# Supplementary material
Source: PubMed Central journal article supplement (PMC5821190)
Supplement: jciinsight-3-97843-s001.pdf [file jciinsight-3-97843-s001.pdf]

# Sup. Figure-1

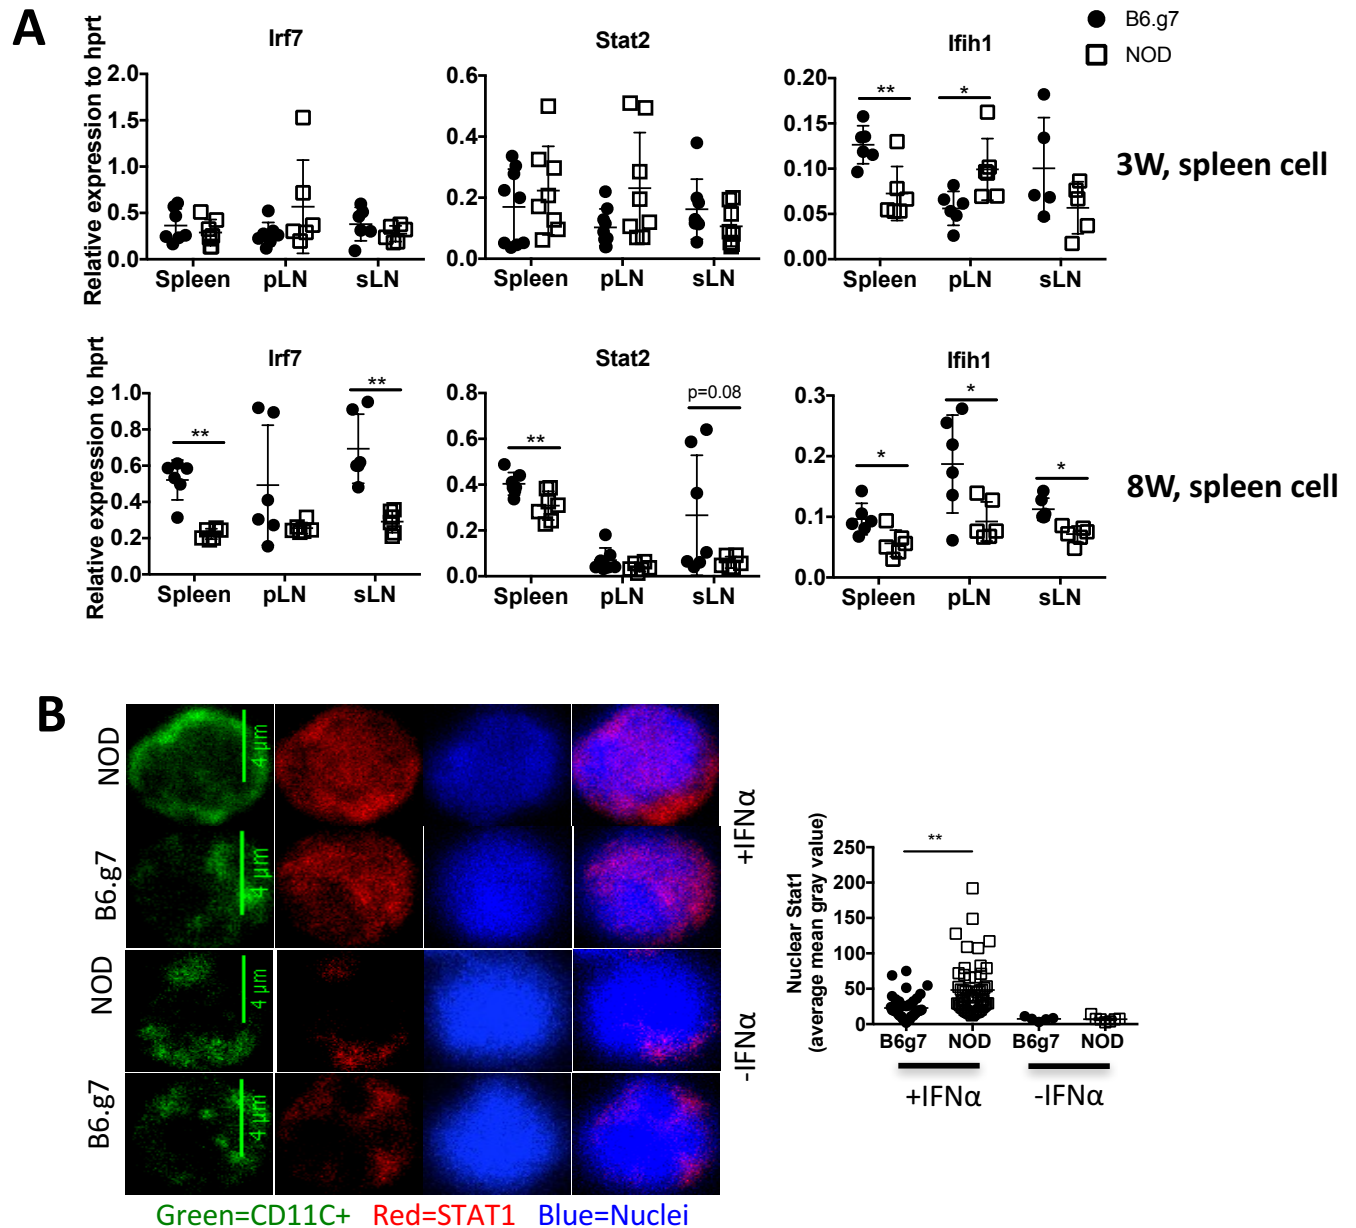

## Sup. Figure-1. Comparison of 3 and 8 week IFN-I-dependent gene expression and signaling

A. IFN-I-related gene expression measured in spleen, pLN and sLN NOD and B6.g7 mice at 3 and 8W by qPCR. B. Spleen cells from NOD and B6.g7 (3w old) mice were stimulated with IFN- $\alpha$  for 30mins, fixed and stained with the indicated antibodies. Nuclear STAT1 localization was determined by confocal microscopy. Images (60X) were quantified to determine nuclear STAT1 levels within CD11C+ cells. Data were representative of 2 independent experiments where cells were pooled from 3 mice. p-values were calculated using 't' test by comparing NOD and B6.g7 strains.

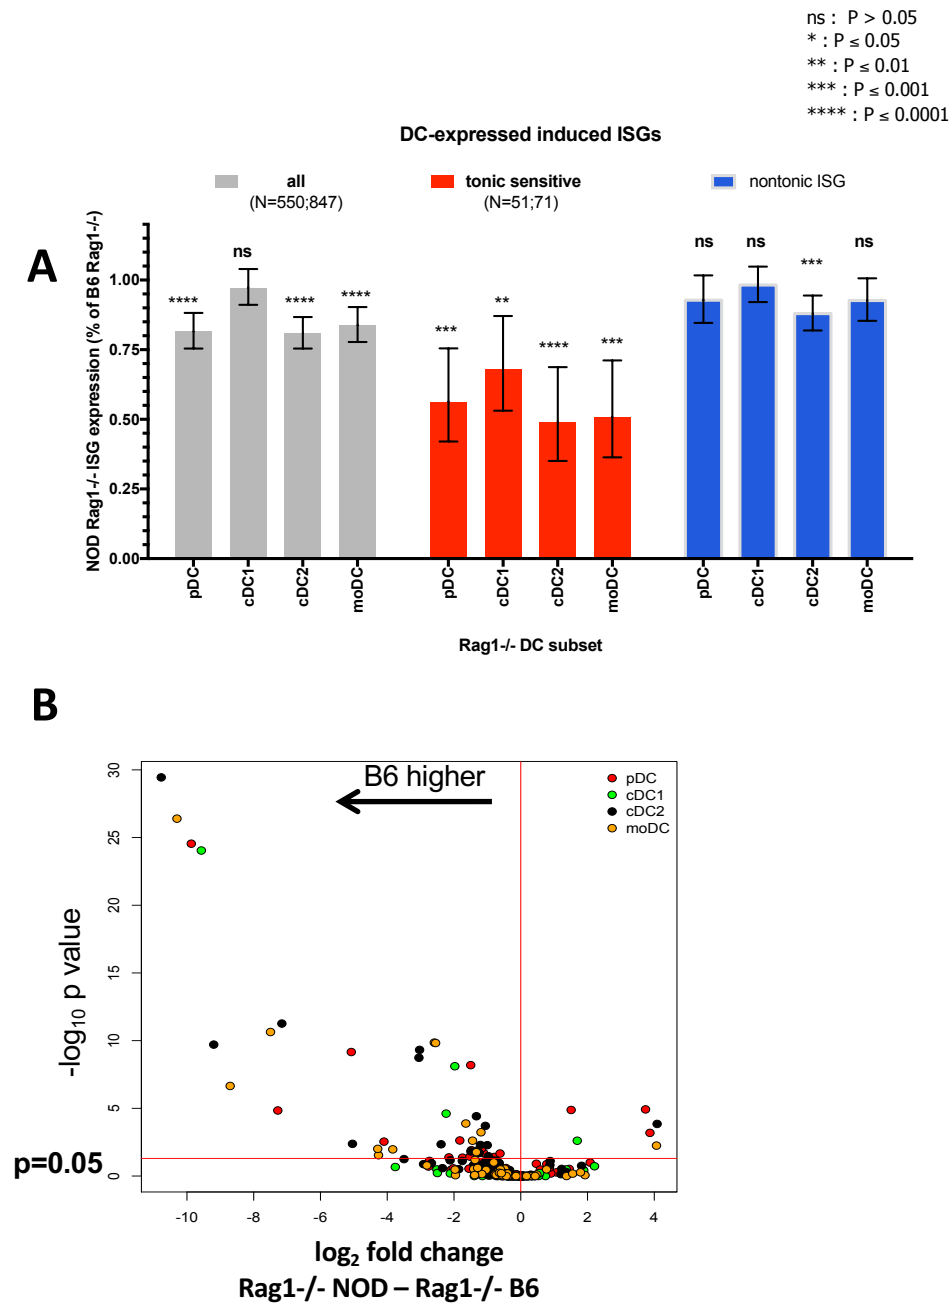

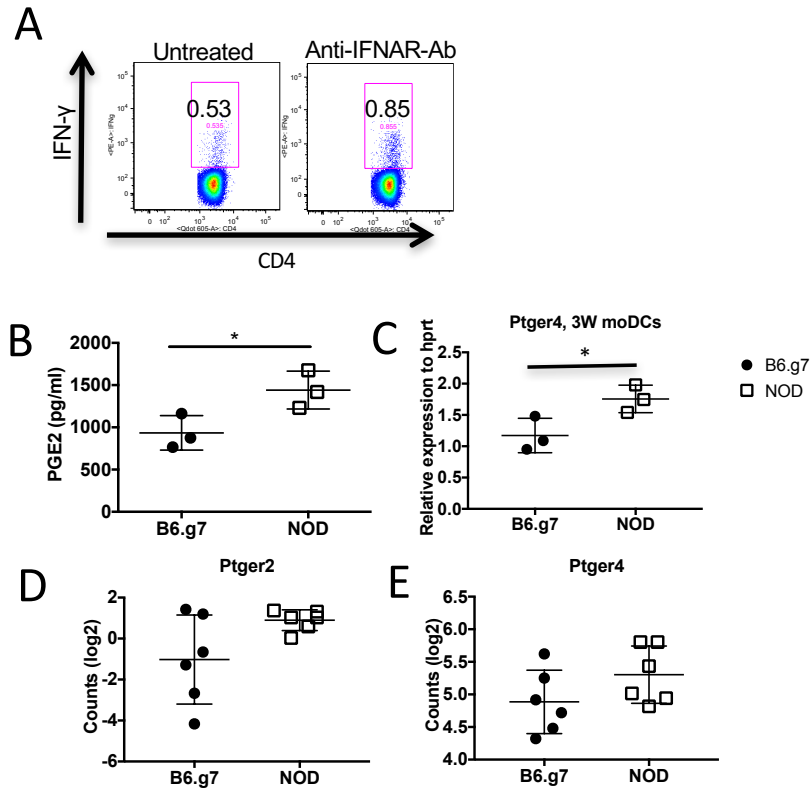

**Supp. Figure-3.** A. Representative flow cytometry data plot of CD4<sup>+</sup>IFN- $\gamma$ <sup>+</sup> T cells from PLN collected from NOD mice after in vivo with or without anti-IFNAR-Ab treatment from 6-8 weeks. Cells were stimulated with PMA+ionomycin for 6h (last 4 with brefeldin). B. Secreted PGE2 levels measured by ELISA after culturing total spleen cells for 12h. C. Transcript levels of Ptger4 in sorted moDCs from 3W old NOD and B6.g7. D. Baseline expression of Ptger2 and Ptger4 in sorted splenic moDCs from 8W old NOD and B6.g7 mice. Data show normalized counts (log2) from RNAseq experiment. Graph shows mean $\pm$ SD for each of the experiments, performed with 3 mice per group and showing representative of 2 independent experiments. p-values were calculated using 't' test by comparing NOD and B6.g7 strains.

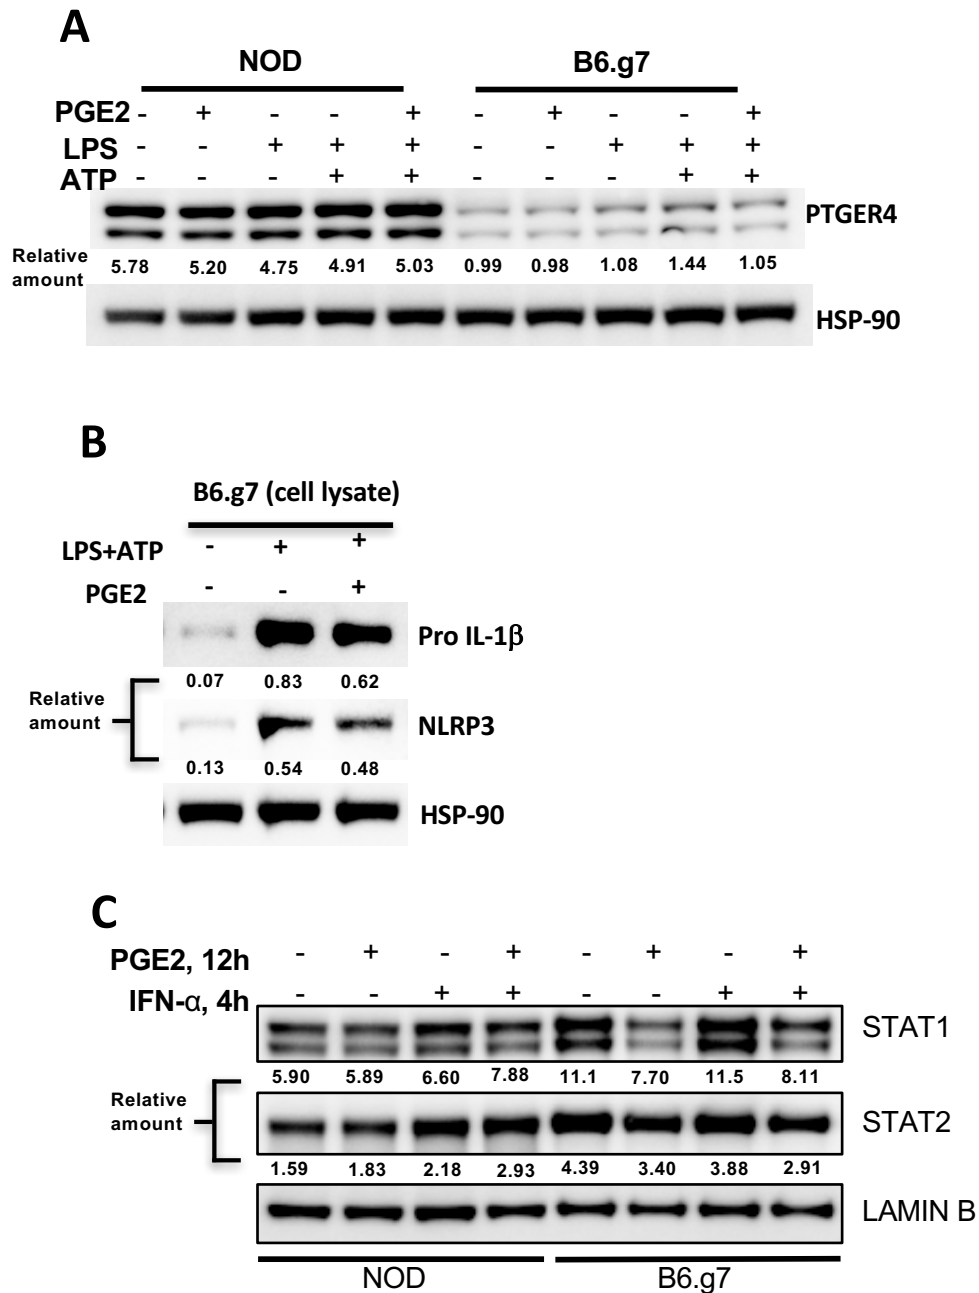

**Supp. Figure-4.** A. PGE2 stimulation does alter PTGER4 expression. Spleen cells from 8W old NOD or B6.g7 mice were stimulated with PGE2 (1μM). After 4h LPS stimulation, PGE2 was added to the culture for 30mins followed by ATP stimulation for 1h. Cells lysates were analyzed by western blotting for PTGER4. B. PGE2-EP4 driven signals were anti-inflammatory in B6.g7 mice. Stimulation was performed as described in (A) with or without PGE2 (1μM). Cells lysates were analyzed by western blotting for IL-1β and NLRP3. C. PGE2-pretreatment and IFN-α-Induced STAT1 and STAT2 levels. Spleen cells were taken from NOD and B6.g7 mice and pulsed with PGE2 (1μM) for 12h followed by IFN-α stimulation for 4h in low serum medium. Cells lysates were analyzed by western blotting for STAT1 and STAT2 expression. Data were representative of two independent experiments with pooled cells from 3 mice in each group.

|               | pDC              |         | cDC1             |         | cDC2             |         | moDC             |         | monocyte         |         |               |                |                    |
|---------------|------------------|---------|------------------|---------|------------------|---------|------------------|---------|------------------|---------|---------------|----------------|--------------------|
|               | B6g7_PBS NOD_PBS |         | B6g7_PBS NOD_PBS |         | B6g7_PBS NOD_PBS |         | B6g7_PBS NOD_PBS |         | B6g7_PBS NOD_PBS |         |               |                |                    |
|               | AvgExpr          | AvgExpr | AvgExpr          | AvgExpr | AvgExpr          | AvgExpr | AvgExpr          | AvgExpr | AvgExpr          | AvgExpr |               |                |                    |
| gene.name     | AvgExpr          | AvgExpr | AvgExpr          | AvgExpr | AvgExpr          | AvgExpr | AvgExpr          | AvgExpr | AvgExpr          | AvgExpr | EntrezGene.id | HUGO.gene.name | transcriptid_long  |
| Zfp85         | 1.461            | 1.407   | 0.760            | 1.275   | 1.353            | 1.470   | 1.878            | 1.509   | 2.094            | 2.325   | 22746         | NA             | NM_001001130_13_-1 |
| Scap          | 5.449            | 5.516   | 4.862            | 4.936   | 5.119            | 5.500   | 4.162            | 4.353   | 3.786            | 3.893   | 235623        | SCAP           | NM_001001144_9_+1  |
| Zfp458        | 0.963            | 2.009   | 0.113            | 1.455   | 0.889            | 1.961   | 1.041            | 0.882   | 0.221            | 1.457   | 238690        | ZNF43          | NM_001001152_13_-1 |
| Taf9b         | 0.698            | -0.730  | 0.972            | 0.129   | 0.179            | -0.553  | -2.504           | -3.410  | -3.232           | -2.978  | 407786        | TAF9B          | NM_001001176_X_-1  |
| BC051142      | 0.722            | 0.536   | -0.338           | 0.233   | 0.047            | 0.148   | -3.301           | -3.910  | -4.981           | -4.981  | 407788        | NA             | NM_001001177_17_+1 |
| Ccdc148       | -0.999           | -2.069  | -1.804           | -0.812  | -0.972           | -0.651  | -1.346           | -0.198  | -2.858           | -1.201  | 227933        | CCDC148        | NM_001001178_2_-1  |
| Zfp941        | -2.948           | -2.583  | -0.471           | 0.122   | -3.657           | -3.075  | -3.677           | -1.744  | -4.981           | -2.867  | 407812        | NA             | NM_001001180_7_-1  |
| BC031181      | 8.016            | 8.108   | 7.081            | 6.993   | 6.985            | 7.066   | 6.708            | 6.644   | 5.792            | 5.656   | 407819        | C18orf32       | NM_001001181_18_+1 |
| Baz2b         | 6.248            | 6.311   | 6.991            | 6.596   | 7.657            | 7.727   | 6.896            | 6.538   | 6.099            | 5.962   | 407823        | BAZ2B          | NM_001001182_2_-1  |
| Tmem204       | -1.596           | -2.087  | -1.155           | -1.189  | 0.519            | -1.093  | -0.783           | -2.541  | -1.051           | -1.867  | 407831        | TMEM204        | NM_001001183_17_-1 |
| Primpol       | 4.018            | 4.161   | 4.440            | 4.587   | 4.763            | 4.704   | 4.479            | 4.146   | 3.787            | 3.906   | 408022        | PRIMPOL        | NM_001001184_8_-1  |
| Zfp456        | 3.170            | 2.696   | 2.164            | 2.526   | 2.725            | 3.282   | 1.987            | 2.516   | 1.885            | 2.742   | 408065        | NA             | NM_001001186_13_-1 |
| Zfp738        | 2.633            | 2.788   | 3.655            | 3.181   | 3.371            | 3.313   | 3.575            | 3.095   | 3.137            | 3.495   | 408068        | ZNF729         | NM_001001187_13_-1 |
| Dis3l         | 2.337            | 2.577   | 2.816            | 2.609   | 3.212            | 2.373   | 2.753            | 2.832   | 4.115            | 3.959   | 213550        | DIS3L          | NM_001001295_9_-1  |
| Thnsl1        | 0.099            | 0.950   | -2.212           | -0.913  | -2.439           | -2.055  | -1.429           | -3.218  | -1.768           | -1.538  | 208967        | THNSL1         | NM_001001297_2_+1  |
| Itga8         | -4.981           | -4.981  | 5.451            | 5.043   | -2.191           | 1.104   | 2.429            | 3.104   | 3.353            | 3.149   | 241226        | ITGA8          | NM_001001309_2_-1  |
| Pramel4       | -3.834           | -1.767  | -2.184           | -3.412  | -2.776           | -3.172  | -3.188           | -3.566  | -3.728           | -4.502  | 347710        | NA             | NM_001001319_4_+1  |
| Tbx10         | -4.981           | -4.981  | -4.964           | -4.954  | -4.981           | -4.981  | -4.980           | -4.979  | -4.981           | -4.981  | 109575        | TBX10          | NM_001001320_19_+1 |
| Slc35d2       | 4.061            | 4.576   | 4.674            | 5.195   | 3.942            | 4.543   | 3.732            | 4.286   | 3.819            | 3.822   | 70484         | SLC35D2        | NM_001001321_13_-1 |
| Adamts13      | -4.178           | -4.981  | -4.937           | -1.370  | -4.847           | -4.648  | -4.930           | -4.771  | -4.981           | -4.691  | 279028        | ADAMTS13       | NM_001001322_2_+1  |
| St5           | -4.981           | -1.887  | -3.279           | -2.121  | -3.720           | -3.890  | -2.085           | -3.456  | -4.981           | -4.981  | 76954         | ST5            | NM_001001326_7_-1  |
| Vkorc1l1      | 0.288            | -1.288  | 1.346            | 0.273   | -1.657           | -1.116  | -2.140           | -1.976  | 0.507            | 0.423   | 69568         | VKORC1L1       | NM_001001327_5_+1  |
| Hexdc         | -0.149           | -0.524  | -0.039           | 0.132   | -1.008           | -1.069  | -0.998           | -0.955  | -0.426           | -1.210  | 238023        | HEXDC          | NM_001001333_11_+1 |
| Plekha8       | -2.308           | 0.786   | -4.792           | -4.799  | -4.855           | -4.928  | -3.645           | -4.334  | -4.120           | -4.108  | 231999        | PLEKHA8        | NM_001001335_6_+1  |
| Cyp2c44       | -2.280           | -0.197  | -4.975           | -4.862  | -4.508           | -4.536  | -4.497           | -4.969  | -4.981           | -2.367  | 226143        | NA             | NM_001001446_19_-1 |
| Zscan22       | -0.736           | -2.628  | -1.666           | -1.696  | -1.287           | -3.301  | -1.013           | -4.765  | -0.139           | -3.707  | 232878        | ZSCAN22        | NM_001001447_7_+1  |
| Ttyh1         | -2.711           | -4.981  | -4.981           | -4.978  | -3.618           | -3.445  | -4.961           | -4.971  | -4.981           | -4.981  | 57776         | TTYH1          | NM_001001454_7_+1  |
| Atp8b1        | -4.981           | -4.981  | -4.969           | -3.443  | -4.875           | -4.395  | -4.132           | -4.874  | -4.981           | -4.981  | 54670         | ATP8B1         | NM_001001488_18_-1 |
| Mfsd4b5       | -4.981           | -4.981  | -3.248           | -4.945  | -4.130           | -4.918  | -3.619           | -4.916  | -4.190           | -4.227  | 215928        | NA             | NM_001001489_10_-1 |
| Tpm4          | 7.571            | 7.666   | 8.372            | 8.462   | 8.633            | 8.521   | 8.651            | 8.634   | 8.686            | 8.763   | 326618        | NA             | NM_001001491_8_+1  |
| Lca5l         | 3.945            | 4.872   | -4.989           | -3.722  | -4.069           | -2.774  | -3.099           | -4.393  | -4.981           | -4.981  | 385668        | LCA5L          | NM_001001492_16_-1 |
| Wdr83os       | 7.011            | 6.946   | 5.878            | 5.768   | 5.755            | 5.721   | 6.150            | 6.050   | 5.332            | 5.086   | 414077        | WDR83OS        | NM_001001493_8_+1  |
| Tnip3         | -2.739           | -4.981  | 1.343            | 1.898   | 0.026            | -0.182  | 2.724            | 3.871   | 2.837            | 3.957   | 414084        | TNIP3          | NM_001001495_6_+1  |
| Gja6          | -0.895           | -2.681  | -2.112           | -2.744  | -3.392           | -4.510  | -4.978           | -2.098  | -4.981           | -1.254  | 414089        | NA             | NM_001001496_X_-1  |
| Chpf          | -2.020           | -4.009  | -1.449           | -2.090  | -0.285           | -2.119  | -1.775           | -1.057  | -4.583           | -4.833  | 74241         | CHPF           | NM_001001565_1_-1  |
| Chpf          | 0.580            | 1.233   | 3.583            | 3.660   | 2.162            | 2.469   | 0.812            | 2.226   | -0.328           | -1.149  | 74241         | CHPF           | NM_001001566_1_-1  |
| Dab2ip        | -4.599           | -4.981  | -4.901           | -3.379  | -3.620           | -3.362  | -4.881           | -4.957  | -4.981           | -4.981  | 69601         | DAB2IP         | NM_001001602_2_+1  |
| Whsc1l1       | -4.422           | -4.521  | -1.363           | -4.904  | -3.088           | -4.892  | -2.100           | -1.955  | -4.507           | -4.894  | 234135        | WHSC1L1        | NM_001001735_8_+1  |
| Zfp950        | 3.624            | 3.364   | 2.905            | 1.649   | 3.258            | 2.255   | 3.444            | 2.024   | 3.122            | 1.549   | 414758        | NA             | NM_001001737_19_-1 |
| Itprlp        | 4.410            | 4.816   | 4.156            | 4.190   | 5.178            | 4.856   | 4.781            | 4.526   | 5.982            | 5.593   | 414801        | ITPRIP         | NM_001001738_19_-1 |
| Zfp239        | -4.475           | -0.841  | -4.789           | -4.810  | -1.530           | -0.246  | -2.070           | -0.322  | -4.867           | -4.850  | 22685         | ZNF239         | NM_001001792_6_+1  |
| Atp11c        | 1.474            | 1.772   | 2.837            | 2.394   | 2.560            | 1.874   | 3.753            | 3.238   | 3.587            | 4.423   | 320940        | ATP11C         | NM_001001798_X_-1  |
| Zfp36l2       | 7.591            | 6.658   | 6.960            | 6.630   | 8.219            | 8.087   | 8.733            | 8.518   | 9.422            | 9.339   | 12193         | ZFP36L2        | NM_001001806_17_-1 |
| Mpzl1         | 1.035            | -1.472  | 0.243            | 0.456   | 0.484            | 0.052   | 0.243            | -2.087  | -0.749           | -1.291  | 68481         | MPZL1          | NM_001001880_1_-1  |
| 251009E07Rik  | 1.185            | 2.051   | 3.215            | 4.314   | 1.250            | 3.529   | 1.371            | 2.671   | 1.645            | 3.609   | 72190         | C3orf70        | NM_001001881_16_-1 |
| Rtel1         | 0.306            | 1.460   | 1.513            | 0.526   | 1.636            | 1.247   | 1.388            | -0.441  | 1.775            | 1.995   | 269400        | RTEL1          | NM_001001882_2_+1  |
| Hecw2         | -0.975           | 0.626   | -0.603           | -0.379  | -0.441           | -0.099  | -1.254           | -2.171  | -2.278           | -3.510  | 329152        | HECW2          | NM_001001883_1_-1  |
| Nckap5l       | 1.155            | 1.537   | 1.903            | 1.481   | 0.474            | 0.375   | 1.410            | 1.021   | 2.641            | 2.245   | 380969        | NCKAP5L        | NM_001001884_15_-1 |
| Tmem151a      | -4.981           | -4.981  | -2.421           | -0.381  | -4.046           | -4.895  | -4.405           | -4.839  | -4.981           | -4.227  | 381199        | TMEM151A       | NM_001001885_19_-1 |
| H2-K1         | 10.410           | 10.090  | 9.696            | 10.046  | 9.589            | 9.483   | 9.661            | 9.599   | 9.176            | 8.231   | 14972         | HLA-A          | NM_001001892_17_-1 |
| Eea1          | 4.412            | 4.455   | 4.880            | 4.892   | 4.744            | 4.610   | 4.665            | 4.750   | 4.175            | 4.658   | 216238        | EEA1           | NM_001001932_10_+1 |
| Utp14b        | -1.541           | -0.273  | -0.285           | -0.026  | 0.527            | -0.808  | 0.574            | 0.818   | 0.977            | 1.296   | 195434        | UTP14C         | NM_001001981_1_+1  |
| A430105119Rik | -1.159           | -2.133  | -4.091           | -3.594  | -4.965           | -3.895  | -3.664           | -4.877  | -0.703           | 0.556   | 214239        | C15orf52       | NM_001001982_2_-1  |
| Pi4ka         | 4.239            | 4.478   | 4.812            | 4.844   | 4.678            | 4.561   | 4.675            | 4.778   | 5.142            | 5.479   | 224020        | PI4KA          | NM_001001983_16_-1 |
| Kdm2a         | 5.067            | 4.749   | 5.394            | 5.380   | 6.116            | 6.025   | 5.886            | 5.678   | 5.891            | 6.095   | 225876        | KDM2A          | NM_001001984_19_-1 |
| Nat8l         | -2.274           | -0.493  | 0.437            | 0.275   | 1.638            | 1.425   | 2.856            | 3.104   | 4.960            | 4.914   | 269642        | NAT8L          | NM_001001985_5_+1  |
| Nol4l         | -3.189           | -4.981  | 2.476            | 2.119   | 0.370            | 0.557   | 1.241            | 1.165   | 0.573            | 1.458   | 329540        | NOL4L          | NM_001001986_2_-1  |
| Gp1bb         | -4.811           | -4.822  | -4.918           | -3.719  | -4.923           | -4.936  | -4.863           | -4.965  | -4.978           | -4.981  | 14724         | GP1BB          | NM_001001999_16_-1 |
| 2610507B11Rik | 5.760            | 5.468   | 6.382            | 6.374   | 6.329            | 6.404   | 6.255            | 6.446   | 7.082            | 7.282   | 72503         | KIAA0100       | NM_001002004_11_+1 |
| Panx2         | -4.981           | -4.981  | -3.517           | -3.769  | -2.732           | -4.721  | -3.239           | -4.168  | -4.394           | -4.981  | 406218        | PANX2          | NM_001002005_15_+1 |
| Zfp948        | 1.417            | 1.929   | 1.563            | 1.386   | 0.812            | 1.045   | 1.560            | 0.998   | 0.905            | 1.768   | 381066        | NA             | NM_001002008_17_+1 |
| Lmna          | -2.571           | -1.010  | 0.166            | 1.821   | -0.992           | 0.833   | -0.518           | 1.969   | 0.802            | 3.701   | 16905         | LMNA           | NM_001002011_3_-1  |
| Hspa2         | 1.229            | 1.798   | -2.757           | 0.394   | -1.712           | -2.899  | -0.294           | -1.578  | -1.568           | -0.613  | 15512         | HSPA2          | NM_001002012_12_+1 |
| Rpl17         | 8.683            | 8.776   | 9.462            | 9.175   | 8.952            | 8.886   | 9.170            | 9.066   | 7.883            | 7.709   | 319195        | RPL17          | NM_001002239_18_+1 |
| Tmem158       | -0.773           | -1.744  | 0.270            | 0.800   | 3.228            | 3.200   | 1.750            | 0.946   | 0.211            | -0.446  | 72309         | TMEM158        | NM_001002267_9_-1  |
| Adgrg6        | -2.739           | -4.981  | 0.659            | 0.557   | 3.766            | 3.200   | 3.373            | 2.513   | 0.839            | 1.584   | 215798        | ADGRG6         | NM_001002268_10_-1 |
| Tro           | -4.981           | -4.981  | -4.750           | -4.969  | -4.806           | -4.945  | -4.981           | -4.981  | -4.981           | -4.981  | 56191         | TRO            | NM_001002272_X_-1  |

|               |        |        |        |        |        |        |        |        |        |        |        |            |                     |
|---------------|--------|--------|--------|--------|--------|--------|--------|--------|--------|--------|--------|------------|---------------------|
| Smg6          | 5.059  | 4.837  | 4.777  | 4.587  | 5.521  | 5.632  | 5.104  | 4.795  | 4.126  | 4.165  | 103677 | SMG6       | NM_001002764_11_+_1 |
| Rab44         | -1.902 | -4.981 | -4.750 | -3.607 | -3.879 | -1.515 | 2.309  | 1.138  | 5.104  | 4.965  | 442827 | RAB44      | NM_001002786_17_+_1 |
| Ccin          | -4.981 | -4.981 | -4.696 | -4.530 | -4.981 | -4.981 | -4.527 | -4.945 | -4.981 | -4.981 | 442829 | CCIN       | NM_001002787_4_+_1  |
| Pram1         | -0.540 | -1.635 | -0.415 | 0.337  | 5.240  | 5.520  | 4.686  | 4.039  | 5.757  | 5.500  | 378460 | PRAM1      | NM_001002842_17_+_1 |
| Fbxl12        | 1.300  | 1.217  | -0.233 | -0.812 | 1.180  | 1.146  | -0.618 | 0.312  | 0.607  | -0.527 | 30843  | FBXL12     | NM_001002846_9_-_1  |
| Al413582      | 6.972  | 6.937  | 6.229  | 6.092  | 6.443  | 6.440  | 6.859  | 6.577  | 5.941  | 5.661  | 106672 | NA         | NM_001002895_17_-_1 |
| Bfsp2         | 3.337  | 2.370  | 2.042  | 2.134  | 2.251  | -0.176 | 1.516  | 1.060  | -2.746 | -2.389 | 107993 | BFSP2      | NM_001002896_9_-_1  |
| Atg9b         | -1.914 | -0.671 | 2.233  | 2.666  | -2.652 | -2.619 | -1.549 | 0.420  | 0.629  | 0.245  | 213948 | ATG9B      | NM_001002897_5_-_1  |
| Sirpb1a       | 1.559  | 0.082  | 1.752  | 1.051  | 8.445  | 8.485  | 8.605  | 8.214  | 6.253  | 6.625  | 320832 | SIRPB1     | NM_001002898_3_-_1  |
| Penk          | -4.981 | -0.824 | -4.781 | -1.591 | -4.975 | -4.863 | -1.234 | -3.943 | 0.540  | -0.277 | 18619  | PENK       | NM_001002927_4_-_1  |
| Nup85         | 4.780  | 4.989  | 5.211  | 5.098  | 5.429  | 5.318  | 5.054  | 5.018  | 4.094  | 3.967  | 445007 | NUP85      | NM_001002929_11_+_1 |
| Try5          | -1.365 | -2.139 | -4.974 | -3.726 | -4.935 | -4.798 | -4.853 | -4.807 | -4.981 | -2.993 | 103964 | PRSS3      | NM_001003405_6_-_1  |
| Zfp457        | -4.981 | -2.878 | -4.701 | -2.845 | -4.913 | -3.215 | -3.927 | -3.432 | -4.981 | -2.525 | 431706 | ZNF93      | NM_001003666_13_-_1 |
| Osopl8        | 4.920  | 5.043  | 4.938  | 4.736  | 5.535  | 5.625  | 6.024  | 5.540  | 5.739  | 6.361  | 237542 | OSBP18     | NM_001003717_10_+_1 |
| Ralgapa1      | 3.830  | 2.690  | 3.775  | 4.037  | 3.667  | 3.766  | 2.621  | 2.688  | 1.289  | 2.116  | 56784  | RALGAPA1   | NM_001003719_12_-_1 |
| Erbp2         | -2.280 | -2.883 | -2.343 | -2.430 | -2.235 | -1.339 | -2.553 | -3.088 | -2.598 | -3.855 | 13866  | ERBB2      | NM_001003817_11_+_1 |
| Masp2         | -4.981 | -1.511 | -4.966 | -2.999 | -4.893 | -3.390 | -4.949 | -2.482 | -4.981 | -2.664 | 17175  | MASP2      | NM_001003893_4_+_1  |
| Tardbp        | 0.249  | -1.088 | -1.364 | 0.018  | -2.659 | -3.906 | -1.008 | -3.808 | -2.493 | -2.003 | 230908 | TARDBP     | NM_001003898_4_-_1  |
| Tardbp        | 2.861  | 2.600  | 2.619  | 2.094  | 2.021  | 2.063  | 2.342  | 1.761  | 0.188  | 1.310  | 230908 | TARDBP     | NM_001003899_4_-_1  |
| Cltc          | 6.498  | 6.546  | 7.399  | 7.386  | 7.507  | 7.408  | 7.554  | 7.586  | 8.100  | 8.451  | 67300  | CLTC       | NM_001003908_11_-_1 |
| Ankib1        | 3.292  | 3.788  | 2.798  | 2.560  | 2.027  | 2.487  | 2.230  | 2.035  | 1.214  | 1.354  | 70797  | ANKIB1     | NM_001003909_5_-_1  |
| Ttc41         | 1.059  | 1.018  | -2.455 | -2.566 | -2.778 | -2.918 | -3.163 | -1.416 | -0.832 | -1.511 | 103220 | NA         | NM_001003910_10_+_1 |
| Adamts7       | -3.563 | -3.267 | -4.938 | -3.862 | -3.572 | -4.951 | -4.944 | -4.535 | -3.925 | -4.981 | 108153 | ADAMTS7    | NM_001003911_9_+_1  |
| Arhgef11      | 3.474  | 3.813  | 3.728  | 3.944  | 2.857  | 2.446  | 3.513  | 3.445  | 4.669  | 4.807  | 213498 | ARHGEF11   | NM_001003912_3_+_1  |
| Mars          | 4.894  | 4.969  | 5.297  | 5.113  | 5.375  | 5.272  | 5.574  | 5.533  | 5.373  | 5.059  | 216443 | MARS       | NM_001003913_10_-_1 |
| Zc4h2         | 0.380  | 0.942  | -0.330 | 1.120  | 1.958  | 2.685  | 2.100  | 2.413  | 0.994  | 2.321  | 245522 | ZC4H2      | NM_001003916_X_-_1  |
| Atg9a         | 2.307  | -1.651 | 2.247  | 1.257  | 0.727  | 1.781  | 1.237  | 2.052  | 4.366  | 3.429  | 245860 | ATG9A      | NM_001003917_1_-_1  |
| Usp7          | 5.801  | 6.039  | 6.074  | 6.162  | 5.802  | 5.927  | 6.073  | 5.891  | 6.047  | 6.159  | 252870 | USP7       | NM_001003918_16_-_1 |
| Ddx11         | 0.180  | 0.944  | 1.728  | 1.796  | 2.483  | 1.738  | 2.314  | 1.704  | 1.202  | 0.916  | 320209 | DDX11      | NM_001003919_17_+_1 |
| Brsk1         | -4.981 | -4.981 | -2.374 | -3.522 | -1.948 | -3.315 | -2.128 | -2.536 | -2.642 | -2.106 | 381979 | BRSK1      | NM_001003920_7_+_1  |
| Rtn3          | -1.586 | 0.279  | -0.481 | -0.760 | -0.481 | 0.406  | -0.182 | 0.488  | 0.535  | 0.951  | 20168  | RTN3       | NM_001003933_19_-_1 |
| Rtn3          | -3.677 | -2.110 | -1.538 | -1.940 | -2.919 | -2.904 | -1.413 | -2.697 | -0.209 | -0.270 | 20168  | RTN3       | NM_001003934_19_-_1 |
| Ttc41         | -3.112 | -1.941 | -2.207 | -2.127 | -2.823 | -3.333 | -3.140 | -2.414 | -2.022 | -2.334 | 103220 | NA         | NM_001003939_10_+_1 |
| Pid1          | 1.674  | -0.630 | 7.842  | 7.477  | 6.394  | 5.234  | 7.418  | 6.873  | 8.282  | 7.462  | 98496  | PID1       | NM_001003948_1_-_1  |
| Tmem259       | 4.872  | 4.817  | 4.284  | 4.139  | 4.262  | 4.272  | 4.766  | 4.685  | 4.651  | 4.676  | 216157 | TMEM259    | NM_001003949_10_-_1 |
| Rab3ip        | 5.637  | 5.580  | 3.554  | 3.462  | 3.925  | 3.991  | 3.302  | 3.291  | 2.713  | 2.641  | 216363 | RAB3IP     | NM_001003950_10_-_1 |
| Kdm2b         | 2.111  | 1.645  | 5.149  | 4.952  | 5.020  | 4.498  | 3.058  | 2.696  | 2.388  | 2.876  | 30841  | KDM2B      | NM_001003953_5_-_1  |
| Rab11fip5     | -4.981 | -1.293 | -2.079 | -1.875 | -4.752 | -4.774 | -0.939 | -2.467 | 1.102  | 1.143  | 52055  | RAB11FIP5  | NM_001003955_6_-_1  |
| Dnmt3b        | -4.546 | -4.648 | -2.445 | -4.838 | -4.691 | -2.329 | -4.207 | -2.408 | -2.997 | -4.870 | 13436  | DNMT3B     | NM_001003960_2_+_1  |
| Dnmt3b        | -4.640 | -4.688 | -4.565 | -4.930 | -4.886 | -4.944 | -4.541 | -4.452 | -4.787 | -4.963 | 13436  | DNMT3B     | NM_001003961_2_+_1  |
| Dnmt3b        | -3.807 | -2.693 | -4.330 | -3.641 | -4.387 | -4.894 | -4.759 | -4.543 | -4.367 | -4.740 | 13436  | DNMT3B     | NM_001003963_2_+_1  |
| Senp7         | -0.838 | -1.329 | -0.123 | -2.249 | -3.235 | -2.147 | -2.608 | -4.004 | -1.398 | -4.748 | 66315  | SENP7      | NM_001003972_16_+_1 |
| Senp7         | -0.482 | 0.106  | -0.431 | -0.186 | -0.239 | -0.495 | -1.471 | -0.580 | -0.767 | 0.154  | 66315  | SENP7      | NM_001003973_16_+_1 |
| Crtc1         | 3.978  | 3.853  | 2.586  | 2.942  | 2.828  | 2.955  | 2.548  | 2.281  | 2.460  | 3.030  | 382056 | CRTC1      | NM_001004062_8_-_1  |
| Zfp386        | 1.979  | -0.117 | 2.239  | 2.196  | 1.214  | 0.662  | 1.059  | 1.094  | 1.464  | 1.515  | 56220  | ZNF519     | NM_001004066_12_+_1 |
| Zfp619        | 1.906  | 0.996  | 2.417  | 1.239  | 2.975  | 2.526  | 2.333  | 1.637  | 3.385  | 2.127  | 70227  | ZNF208     | NM_001004139_7_+_1  |
| Ckap2         | -1.164 | -1.693 | 2.416  | 2.969  | 2.975  | 2.529  | 2.533  | 1.845  | 0.778  | 0.881  | 80986  | CKAP2      | NM_001004140_8_-_1  |
| Nlrp1a        | 1.732  | 4.395  | 3.514  | 5.339  | 4.070  | 5.001  | 4.067  | 4.249  | 4.918  | 4.522  | 195046 | NA         | NM_001004142_11_-_1 |
| Usp22         | 5.024  | 5.042  | 7.135  | 6.637  | 5.212  | 5.276  | 5.233  | 5.492  | 5.767  | 5.927  | 216825 | USP22      | NM_001004143_11_-_1 |
| Git1          | 3.670  | 3.698  | 4.616  | 4.402  | 4.580  | 4.264  | 4.312  | 3.923  | 4.775  | 4.857  | 216963 | GIT1       | NM_001004144_11_+_1 |
| Zfp366        | -1.576 | -4.981 | 5.641  | 5.897  | 4.778  | 4.579  | 3.949  | 3.531  | -1.851 | -0.527 | 238803 | ZNF366     | NM_001004149_13_+_1 |
| A4galt        | -0.788 | -4.981 | -1.790 | -2.301 | -1.511 | -1.147 | -1.232 | -0.883 | -4.981 | -4.981 | 239559 | A4GALT     | NM_001004150_15_-_1 |
| Rragb         | 2.599  | 2.166  | 3.131  | 3.110  | 2.877  | 2.826  | 2.579  | 2.374  | 0.586  | 0.096  | 245670 | RRAGB      | NM_001004154_X_+_1  |
| 9930012K11Rik | 0.309  | -1.838 | -0.756 | -1.131 | -1.944 | -2.949 | -1.497 | -1.126 | -1.476 | -2.919 | 268759 | C8orf58    | NM_001004155_14_-_1 |
| Scarf1        | -0.332 | -4.981 | -0.242 | -0.360 | -1.736 | -2.717 | 0.567  | 0.553  | 3.111  | 3.272  | 380713 | SCARF1     | NM_001004157_11_+_1 |
| Clec4b2       | -4.981 | -4.981 | 5.513  | 6.321  | -4.003 | -1.326 | -2.088 | 1.340  | 0.098  | -4.342 | 381809 | NA         | NM_001004159_6_+_1  |
| Gnptab        | 5.598  | 5.877  | 4.596  | 4.478  | 4.898  | 4.914  | 5.013  | 5.333  | 6.060  | 6.219  | 432486 | GNPTAB     | NM_001004164_10_+_1 |
| Sgpp2         | -1.657 | -1.310 | -3.012 | -1.802 | -2.017 | -2.673 | -2.732 | -1.080 | -2.504 | -3.741 | 433323 | SGPP2      | NM_001004173_1_+_1  |
| AA467197      | 1.855  | 1.343  | -0.646 | -4.779 | -1.711 | -2.624 | 1.201  | -0.745 | -0.316 | -2.867 | 433470 | C15orf48   | NM_001004174_2_+_1  |
| Maml3         | 1.581  | 2.069  | 1.169  | 1.058  | 3.226  | 3.245  | 3.227  | 3.304  | 3.939  | 3.846  | 433586 | MAML3      | NM_001004176_3_-_1  |
| Celsr2        | -4.003 | -2.042 | -2.463 | -4.978 | -1.255 | -2.273 | -2.733 | -3.217 | -0.945 | -0.765 | 53883  | CELSR2     | NM_001004177_3_-_1  |
| AA415398      | 1.256  | 1.787  | 0.298  | -0.233 | -0.472 | 0.333  | -0.280 | 0.057  | 0.450  | 0.160  | 433752 | FRG2 FRG2B | NM_001004178_4_-_1  |
| Fam222a       | -1.504 | -0.579 | -4.734 | -4.579 | -3.412 | -4.322 | -2.922 | -3.919 | -3.109 | -4.981 | 433940 | FAM222A    | NM_001004180_5_+_1  |
| Whamm         | 3.780  | 3.914  | 5.183  | 4.656  | 4.008  | 3.588  | 4.126  | 3.288  | 4.456  | 3.424  | 434204 | WHAMM      | NM_001004185_7_+_1  |
| 2610020H08Rik | 0.286  | -0.446 | -0.955 | -0.878 | 0.122  | 0.110  | -0.016 | -0.369 | -1.167 | 0.163  | 434234 | LOC81691   | NM_001004187_7_+_1  |
| Zfp560        | 3.908  | 3.971  | 2.773  | 2.769  | 3.059  | 3.449  | 3.224  | 3.113  | 1.879  | 2.187  | 434377 | ZNF560     | NM_001004190_9_-_1  |
| Gm5617        | 6.172  | 5.625  | 4.291  | 4.051  | 3.906  | 4.073  | 4.345  | 4.092  | 4.008  | 3.945  | 434402 | C11orf71   | NM_001004191_9_+_1  |
| Rhox8         | -2.386 | -3.267 | -3.420 | -4.312 | -1.311 | -3.060 | -1.236 | -3.138 | -1.797 | -2.848 | 434768 | NA         | NM_001004193_X_-_1  |
| Amigo1        | 1.561  | 0.408  | 0.274  | -1.409 | -0.008 | -0.082 | -0.973 | 0.267  | -0.029 | -0.037 | 229715 | AMIGO1     | NM_001004293_3_+_1  |
| Gprasp1       | 1.721  | 1.451  | 0.661  | 0.494  | 1.541  | 1.318  | 1.117  | 0.956  | 1.269  | 1.511  | 67298  | GPRASP1    | NM_001004359_X_+_1  |
| Tpgs2         | 4.874  | 5.323  | 4.257  | 4.450  | 4.493  | 4.580  | 4.159  | 4.589  | 3.566  | 3.830  | 66648  | TPGS2      | NM_001004361_18_-_1 |
| 2610008E11Rik | 3.718  | 3.570  | 3.432  | 3.066  | 3.659  | 3.900  | 3.589  | 3.411  | 3.381  | 4.193  | 72128  | NA         | NM_001004362_10_-_1 |
| Nuak1         | -1.036 | -1.656 | 0.140  | 0.594  | 1.519  | 1.076  | 1.980  | 1.199  | -3.531 | -0.831 | 77976  | NUAK1      | NM_001004363_10_-_1 |
| Asap2         | -1.630 | -2.025 | 4.389  | 3.512  | 3.053  | 0.391  | 1.476  | 0.094  | 0.449  | 1.435  | 211914 | ASAP2      | NM_001004364_12_+_1 |

|               |        |        |        |        |        |        |        |        |        |        |        |          |                     |
|---------------|--------|--------|--------|--------|--------|--------|--------|--------|--------|--------|--------|----------|---------------------|
| Actr3b        | -0.746 | -0.451 | -1.642 | -0.231 | -1.174 | 1.635  | -2.799 | 0.496  | -1.903 | -0.757 | 242894 | ACTR3B   | NM_001004365_5_+_1  |
| Scube3        | -4.981 | -4.981 | -0.875 | -2.517 | -3.609 | -4.115 | -1.243 | -3.596 | -4.981 | -4.981 | 268935 | SCUBE3   | NM_001004366_17_+_1 |
| Pik3r6        | -1.009 | -1.455 | 0.670  | 0.832  | 1.284  | 0.443  | 0.997  | 2.039  | 4.219  | 3.889  | 104709 | PIK3R6   | NM_001004435_11_+_1 |
| Wapl          | 5.449  | 5.985  | 6.411  | 6.329  | 6.521  | 6.621  | 6.123  | 6.058  | 5.897  | 6.075  | 218914 | WAPL     | NM_001004436_14_+_1 |
| Pigu          | 5.768  | 5.865  | 5.248  | 5.093  | 5.145  | 5.103  | 4.990  | 5.091  | 4.675  | 4.306  | 228812 | PIGU     | NM_001004721_2_-_1  |
| Pla2g4c       | -4.981 | -4.981 | -2.771 | -3.435 | -3.922 | -3.418 | -4.622 | -1.925 | -4.126 | -4.981 | 232889 | PLA2G4C  | NM_001004762_7_+_1  |
| Znhit3        | 5.397  | 5.306  | 3.718  | 3.889  | 4.285  | 4.317  | 4.280  | 4.126  | 2.951  | 2.860  | 448850 | ZNHIT3   | NM_001005223_11_-_1 |
| Hps5          | 3.618  | 3.724  | 5.874  | 5.194  | 4.504  | 4.586  | 4.928  | 5.331  | 5.782  | 6.211  | 246694 | HP55     | NM_001005247_7_-_1  |
| Hps5          | 2.339  | 3.460  | 4.119  | 4.588  | 3.152  | 3.307  | 3.403  | 3.563  | 3.709  | 3.507  | 246694 | HP55     | NM_001005248_7_-_1  |
| Ypel2         | 3.210  | 3.033  | 2.526  | 2.087  | 2.292  | 2.092  | 2.886  | 1.638  | 3.549  | 3.434  | 77864  | YPEL2    | NM_001005341_11_-_1 |
| Ypel4         | -4.981 | -2.533 | -4.933 | -2.181 | -4.891 | -2.621 | -4.836 | -2.171 | -4.981 | -4.981 | 241525 | YPEL4    | NM_001005342_2_+_1  |
| Zfp960        | -0.795 | -2.684 | -2.961 | -1.467 | -3.808 | -3.404 | -1.664 | -2.392 | -0.979 | -4.981 | 449000 | NA       | NM_001005358_17_+_1 |
| Spin2c        | -2.178 | -4.981 | -2.096 | -1.710 | -3.947 | -3.231 | -4.498 | -1.438 | -4.981 | -4.981 | 278240 | NA       | NM_001005370_X_+_1  |
| Gprasp1       | 2.460  | 3.178  | 1.951  | 1.285  | 2.091  | 2.566  | 1.350  | 1.502  | 1.689  | 1.418  | 67298  | GPRASP1  | NM_001005385_X_+_1  |
| Ado           | 3.566  | 3.607  | 4.046  | 4.025  | 4.156  | 4.042  | 4.168  | 3.994  | 4.119  | 4.696  | 211488 | ADO      | NM_001005419_10_-_1 |
| Ppp1r26       | -4.981 | -4.981 | -3.462 | -2.050 | -4.571 | -4.462 | -4.064 | -2.980 | -3.750 | -4.981 | 241289 | PPP1R26  | NM_001005420_2_+_1  |
| Amica1        | 8.606  | 8.843  | 7.997  | 8.110  | 7.240  | 7.791  | 6.603  | 7.484  | 5.323  | 8.028  | 270152 | JAML     | NM_001005421_9_+_1  |
| Mreg          | 2.690  | 1.095  | 5.784  | 6.184  | 7.768  | 7.678  | 6.159  | 4.934  | -0.471 | -1.131 | 381269 | MREG     | NM_001005423_1_-_1  |
| Gm996         | -3.189 | -1.003 | -0.637 | -0.693 | 0.696  | 1.696  | -1.505 | -0.442 | -4.981 | -4.981 | 381353 | C9orf172 | NM_001005424_2_-_1  |
| Zcwpw1        | 3.609  | 3.029  | 0.085  | -1.531 | 2.108  | 2.126  | 1.413  | 1.045  | 0.902  | -0.046 | 381678 | ZCWPW1   | NM_001005426_5_+_1  |
| Iqsec2        | 2.188  | 2.456  | 0.224  | 0.541  | -1.010 | -0.960 | 0.401  | 1.216  | 1.894  | 2.144  | 245666 | IQSEC2   | NM_001005475_X_+_1  |
| Olfr111       | -4.981 | -4.981 | -4.582 | -2.979 | -0.954 | 1.380  | -2.148 | -0.796 | -4.981 | -4.981 | 545205 | OR5V1    | NM_001005485_17_+_1 |
| Txlna         | 3.825  | 4.296  | 3.837  | 4.029  | 4.507  | 4.626  | 4.269  | 4.700  | 4.401  | 4.432  | 109658 | TXLNA    | NM_001005506_4_-_1  |
| Smg7          | 3.411  | 3.714  | 4.685  | 4.866  | 4.692  | 4.576  | 4.384  | 4.308  | 4.502  | 4.720  | 226517 | SMG7     | NM_001005507_1_-_1  |
| Arhgap30      | 6.550  | 6.662  | 7.788  | 7.817  | 8.074  | 8.035  | 8.034  | 8.065  | 8.883  | 8.769  | 226652 | ARHGAP30 | NM_001005508_1_+_1  |
| Eif2a         | 5.601  | 5.213  | 5.260  | 4.894  | 4.596  | 4.378  | 4.872  | 4.650  | 5.017  | 4.699  | 229317 | EIF2A    | NM_001005509_3_+_1  |
| Syne2         | 5.634  | 5.703  | 3.338  | 2.611  | 2.953  | 2.603  | 2.925  | 3.368  | 3.539  | 3.255  | 319565 | SYNE2    | NM_001005510_12_+_1 |
| Lmtk3         | -4.981 | -4.981 | -4.861 | -4.969 | -4.601 | -4.897 | -4.356 | -4.747 | -4.981 | -4.981 | 381983 | LMTK3    | NM_001005511_7_+_1  |
| Rsrc2         | 6.809  | 7.026  | 6.259  | 6.212  | 6.428  | 6.576  | 6.430  | 6.249  | 5.538  | 5.621  | 208606 | NA       | NM_001005525_5_-_1  |
| Aebp2         | 2.362  | 1.547  | 4.393  | 3.947  | 5.527  | 5.107  | 5.147  | 4.352  | 4.209  | 4.032  | 11569  | AEBP2    | NM_001005605_6_+_1  |
| Itgb4         | -4.393 | -3.527 | -4.269 | -4.636 | -4.761 | -4.960 | -4.883 | -4.826 | -2.795 | -4.981 | 192897 | ITGB4    | NM_001005608_11_+_1 |
| Phactr1       | -4.981 | -4.981 | -4.977 | -4.916 | -4.981 | -4.981 | -4.981 | -4.981 | -4.981 | -4.981 | 218194 | PHACTR1  | NM_001005740_13_+_1 |
| Phactr1       | -3.563 | -4.981 | -1.773 | -1.806 | -3.671 | -2.954 | -4.204 | -2.729 | -3.394 | -3.386 | 218194 | PHACTR1  | NM_001005748_13_+_1 |
| Parl          | 6.701  | 6.593  | 6.683  | 6.801  | 6.479  | 6.346  | 6.855  | 6.728  | 6.901  | 6.579  | 381038 | PARL     | NM_001005767_16_-_1 |
| Patj          | -2.489 | -0.712 | 0.905  | 1.293  | 1.019  | 0.971  | -0.169 | -0.882 | -2.391 | -2.581 | 12695  | PATJ     | NM_001005784_4_+_1  |
| Patj          | -4.981 | -3.408 | -1.133 | -2.526 | -2.020 | -3.134 | -1.639 | -4.677 | -4.966 | -4.926 | 12695  | PATJ     | NM_001005787_4_+_1  |
| Zfp69         | 0.884  | 4.605  | 0.860  | 2.585  | 1.374  | 3.392  | 1.321  | 3.441  | 0.926  | 3.005  | 381549 | ZFP69    | NM_001005788_4_-_1  |
| Mcoln2        | 2.729  | 2.488  | -1.466 | 0.227  | -2.056 | -2.291 | -1.006 | 1.071  | -4.069 | -2.153 | 68279  | MCOLN2   | NM_001005846_3_+_1  |
| Aga           | 6.666  | 6.770  | 4.985  | 5.245  | 5.167  | 5.359  | 4.523  | 4.769  | 4.166  | 4.602  | 11593  | AGA      | NM_001005847_8_+_1  |
| Ifit3b        | 0.239  | -1.694 | 0.012  | -3.654 | 4.215  | 2.560  | 3.922  | 2.197  | 4.321  | 2.824  | 667370 | IFIT3    | NM_001005858_19_+_1 |
| Rpl34         | 6.983  | 5.473  | 6.899  | 5.798  | 6.501  | 5.586  | 7.027  | 5.751  | 5.865  | 4.764  | 68436  | NA       | NM_001005859_3_-_1  |
| Clec4a4       | 0.485  | -0.543 | 1.086  | 0.259  | 8.207  | 8.409  | 6.769  | 5.445  | 2.674  | 2.557  | 474145 | NA       | NM_001005860_6_+_1  |
| Mtus1         | -4.981 | -4.981 | -4.981 | -4.981 | -4.981 | -4.981 | -4.981 | -4.981 | -4.140 | -4.269 | 102103 | MTUS1    | NM_001005863_8_-_1  |
| Mtus1         | -0.260 | -3.105 | 0.715  | -4.675 | -0.217 | -2.944 | 1.888  | -0.353 | 3.727  | 3.918  | 102103 | MTUS1    | NM_001005864_8_-_1  |
| Mtus1         | -2.243 | -3.494 | 0.826  | 0.456  | 2.790  | 0.482  | 4.129  | 3.808  | 7.592  | 7.569  | 102103 | MTUS1    | NM_001005865_8_-_1  |
| Zmiz2         | 6.076  | 5.967  | 5.112  | 5.394  | 6.430  | 6.171  | 6.310  | 5.179  | 3.764  | 4.265  | 52915  | ZMIZ2    | NM_001005867_11_+_1 |
| Erbin         | -0.009 | -1.132 | 1.666  | 1.986  | -0.020 | 0.258  | 0.819  | 1.802  | 1.215  | 2.647  | 59079  | ERBIN    | NM_001005868_13_-_1 |
| Zbtb9         | 3.321  | 3.302  | 3.637  | 3.585  | 3.448  | 3.525  | 3.879  | 3.697  | 3.927  | 3.799  | 474156 | ZBTB9    | NM_001005916_17_+_1 |
| Epb41l1       | -4.632 | -4.641 | -3.963 | -4.439 | -4.468 | -2.152 | -4.004 | -2.877 | -4.964 | -1.088 | 13821  | EPB41L1  | NM_001006664_2_+_1  |
| Adam22        | -4.981 | -4.981 | -4.336 | -3.448 | -3.916 | -3.507 | -4.728 | -4.626 | -4.981 | -4.603 | 11496  | ADAM22   | NM_001007220_5_-_1  |
| Adam22        | -4.981 | -4.981 | 1.093  | 3.738  | 0.380  | 3.751  | -0.150 | 1.982  | -4.981 | -2.466 | 11496  | ADAM22   | NM_001007221_5_-_1  |
| Zdhhc23       | -3.189 | -0.964 | 0.057  | -0.040 | -2.359 | -1.637 | -1.134 | -1.156 | 0.738  | 1.150  | 332175 | ZDHHC23  | NM_001007460_16_-_1 |
| Spag8         | -3.349 | -4.981 | -3.378 | -4.377 | -3.795 | -4.820 | -4.981 | -4.981 | -4.981 | -4.981 | 433700 | SPAG8    | NM_001007463_4_-_1  |
| Rffl          | 1.029  | 2.100  | 1.465  | 1.238  | 0.205  | 0.541  | 2.243  | 2.284  | 4.362  | 4.200  | 67338  | RFFL     | NM_001007465_11_-_1 |
| Slc7a6os      | 5.172  | 5.265  | 4.580  | 4.695  | 4.394  | 4.616  | 4.396  | 4.450  | 3.983  | 4.060  | 66432  | SLC7A6OS | NM_001007567_8_-_1  |
| Zfp251        | 3.158  | 3.028  | 2.490  | 2.230  | 2.905  | 2.798  | 1.969  | 2.128  | 1.966  | 2.064  | 71591  | ZNF251   | NM_001007568_15_-_1 |
| Slc25a42      | 0.185  | 0.417  | 0.166  | 0.055  | 0.417  | 0.178  | 0.567  | 0.646  | -0.646 | 0.365  | 73095  | SLC25A42 | NM_001007570_8_-_1  |
| D8Ert738e     | 7.422  | 6.770  | 6.487  | 6.311  | 7.135  | 6.704  | 7.250  | 6.669  | 6.624  | 5.988  | 101966 | C19orf53 | NM_001007571_8_-_1  |
| Maneal        | -3.563 | -4.981 | -2.736 | -1.889 | -0.812 | -0.462 | -2.411 | -1.988 | -1.049 | -1.865 | 215090 | MANEAL   | NM_001007573_4_-_1  |
| A830010M20Rik | 3.274  | 3.646  | -1.084 | -0.563 | 1.002  | 1.051  | -0.110 | -0.459 | -1.203 | -0.650 | 231570 | KIAA1107 | NM_001007574_5_+_1  |
| Zfp58         | 3.192  | 3.243  | 3.220  | 2.732  | 3.027  | 2.965  | 3.076  | 2.879  | 2.851  | 3.133  | 238693 | NA       | NM_001007575_13_-_1 |
| Tceanc        | 3.285  | 3.131  | 2.182  | 2.037  | 2.924  | 2.434  | 2.675  | 2.206  | 3.216  | 3.040  | 245695 | TCEANC   | NM_001007577_X_-_1  |
| Armxc6        | 4.100  | 3.711  | 2.254  | 2.125  | 0.537  | -0.298 | 0.028  | 0.628  | -2.946 | -0.108 | 278097 | ARMXC6   | NM_001007578_X_-_1  |
| Trp53rka      | 3.804  | 3.868  | 4.145  | 4.185  | 3.714  | 3.723  | 3.949  | 3.979  | 4.044  | 3.661  | 381406 | TP53RK   | NM_001007581_2_-_1  |
| Akirin2       | 5.574  | 5.921  | 5.286  | 5.260  | 5.840  | 5.625  | 5.739  | 5.789  | 5.573  | 6.082  | 433693 | AKIRIN2  | NM_001007589_4_+_1  |
| Rtn1          | -4.540 | -4.685 | -4.557 | -4.808 | -1.858 | -4.933 | -4.533 | -4.885 | -4.655 | -4.921 | 104001 | RTN1     | NM_001007596_12_-_1 |
| Daam2         | -4.981 | -4.981 | -4.353 | -3.875 | -4.268 | -4.000 | -3.438 | -4.506 | -2.075 | -2.044 | 76441  | DAAM2    | NM_001008231_17_-_1 |
| Asap3         | -4.981 | -1.347 | -0.584 | 0.446  | -1.295 | -0.852 | -0.264 | -0.847 | -4.981 | -2.391 | 230837 | ASAP3    | NM_001008232_4_+_1  |
| Plekhn1       | 0.585  | 1.314  | 3.513  | 4.344  | 1.779  | 2.119  | 0.893  | 1.254  | 1.115  | 1.091  | 231002 | PLEKHN1  | NM_001008233_4_-_1  |
| Bnip2         | 3.670  | 4.281  | 5.324  | 5.525  | 4.936  | 5.353  | 5.108  | 5.851  | 5.578  | 6.342  | 12175  | BNIP2    | NM_001008238_9_+_1  |
| Aox2          | -0.038 | 2.420  | -2.204 | -2.198 | -4.960 | -4.506 | -4.869 | -3.338 | -4.981 | -4.981 | 213043 | NA       | NM_001008419_1_+_1  |
| Nol10         | 2.535  | 1.864  | 3.045  | 2.812  | 3.366  | 3.058  | 2.990  | 2.512  | 3.241  | 3.319  | 217431 | NOL10    | NM_001008421_12_+_1 |
| Scaf1         | 3.157  | 3.251  | 3.784  | 3.648  | 3.970  | 3.606  | 4.000  | 3.620  | 4.592  | 4.613  | 233208 | NA       | NM_001008422_7_-_1  |
| Thoc6         | 4.820  | 4.917  | 4.317  | 4.418  | 4.394  | 4.087  | 4.047  | 4.275  | 3.976  | 3.787  | 386612 | THOC6    | NM_001008425_17_-_1 |

|               |        |        |        |        |        |        |        |        |        |        |        |          |                    |
|---------------|--------|--------|--------|--------|--------|--------|--------|--------|--------|--------|--------|----------|--------------------|
| Teddm1b       | 0.468  | 0.877  | -0.724 | -0.419 | -1.009 | -0.246 | -0.699 | -1.490 | -1.814 | -2.256 | 433365 | TEDDM1   | NM_001008426_1_+1  |
| Zfp975        | 1.899  | 2.450  | 1.804  | 2.654  | 1.791  | 2.140  | 1.131  | 1.424  | 0.886  | 1.672  | 434179 | ZNF14    | NM_001008427_7_-1  |
| P2ry14        | 0.975  | 1.059  | -1.242 | -0.913 | -4.913 | -3.564 | -1.179 | -1.681 | -1.018 | -1.304 | 140795 | P2RY14   | NM_001008497_3_-1  |
| Wdr34         | 2.458  | 2.625  | 1.811  | 2.245  | 1.494  | 2.057  | 1.025  | 1.666  | 0.808  | 0.614  | 71820  | WDR34    | NM_001008498_2_-1  |
| Zfp760        | 1.086  | 1.596  | 1.875  | 1.038  | 2.077  | 1.926  | 2.201  | 2.085  | 1.525  | 2.617  | 240034 | NA       | NM_001008501_17_+1 |
| Bbs12         | -1.398 | 0.548  | 2.134  | 1.935  | -3.243 | -0.302 | 0.016  | 1.603  | 1.073  | 0.126  | 241950 | BBS12    | NM_001008502_3_+1  |
| Zc3h14        | 3.836  | 3.934  | 3.822  | 3.637  | 3.687  | 3.623  | 3.556  | 3.427  | 3.600  | 3.554  | 75553  | ZC3H14   | NM_001008506_12_+1 |
| Adora1        | -4.981 | -4.981 | -4.981 | -4.981 | -4.950 | -4.950 | -4.981 | -4.981 | -4.981 | -4.981 | 11539  | ADORA1   | NM_001008533_1_-1  |
| Mxi1          | -0.136 | -0.845 | 4.400  | 3.820  | 3.569  | 2.209  | 4.042  | 3.589  | 5.778  | 4.802  | 17859  | MXI1     | NM_001008542_19_+1 |
| Mxi1          | 2.347  | 2.071  | 0.194  | -0.315 | -0.796 | 0.186  | 0.743  | 0.529  | -0.921 | 1.783  | 17859  | MXI1     | NM_001008543_19_+1 |
| Tardbp        | -0.270 | 1.369  | -0.340 | 0.601  | -0.123 | -1.167 | -0.757 | -0.645 | -4.981 | -1.074 | 230908 | TARDBP   | NM_001008545_4_-1  |
| Tardbp        | -1.503 | -0.245 | -2.751 | -0.696 | -1.561 | -0.479 | -2.156 | -1.647 | -4.981 | -3.336 | 230908 | TARDBP   | NM_001008546_4_-1  |
| 1700001J03Rik | -2.483 | -3.408 | -2.464 | -4.354 | -3.437 | -4.702 | -4.186 | -4.913 | -3.925 | -4.981 | 69282  | NA       | NM_001008547_5_-1  |
| Pde2a         | -3.817 | -3.261 | -4.322 | -4.688 | -4.566 | -4.881 | -4.419 | -4.741 | -4.136 | -4.238 | 207728 | PDE2A    | NM_001008548_7_+1  |
| Zfp658        | 4.940  | 5.122  | -1.133 | 0.034  | 1.136  | 1.078  | 1.677  | 1.943  | 2.832  | 3.337  | 210104 | NA       | NM_001008549_7_+1  |
| Zfyve26       | 4.098  | 3.929  | 4.754  | 4.760  | 4.452  | 4.391  | 4.206  | 4.342  | 4.450  | 4.640  | 211978 | ZFYVE26  | NM_001008550_12_-1 |
| Il4ra         | 5.002  | 4.964  | 5.606  | 5.684  | 5.801  | 5.728  | 6.057  | 6.021  | 6.662  | 6.860  | 16190  | IL4R     | NM_001008700_7_+1  |
| Dab2          | -3.229 | -4.981 | -3.048 | -2.559 | -4.527 | -3.623 | -4.810 | -4.967 | -4.981 | -3.349 | 13132  | DAB2     | NM_001008702_15_+1 |
| Bud31         | 6.183  | 6.109  | 5.763  | 5.735  | 5.579  | 5.619  | 5.708  | 5.576  | 5.156  | 5.065  | 231889 | NA       | NM_001008705_5_+1  |
| Calm5         | -0.720 | -0.099 | -4.981 | -4.981 | -4.946 | -4.946 | -2.519 | -4.941 | -4.981 | -4.981 | 494124 | NA       | NM_001008706_13_+1 |
| Kbtbd8        | 0.198  | 1.594  | 0.780  | 0.780  | -0.044 | 1.547  | 0.861  | 0.785  | 1.873  | 1.444  | 243574 | KBTBD8   | NM_001008707_6_+1  |
| Whrn          | -1.495 | 0.382  | -3.905 | -3.908 | -3.267 | -3.902 | -3.810 | -2.554 | -4.478 | -4.227 | 73750  | WHRN     | NM_001008791_4_-1  |
| Whrn          | -0.666 | -0.163 | -3.610 | -3.410 | -1.720 | -1.319 | -3.059 | -4.600 | -4.332 | -2.772 | 73750  | WHRN     | NM_001008792_4_-1  |
| Whrn          | -0.654 | -0.947 | -2.668 | -4.076 | -0.416 | -1.570 | -1.261 | -1.750 | -3.851 | -2.381 | 73750  | WHRN     | NM_001008793_4_-1  |
| Adam6b        | -1.340 | -0.285 | -4.946 | -4.430 | -4.980 | -4.932 | -2.978 | -4.364 | -4.981 | -4.981 | 238405 | NA       | NM_001009545_12_+1 |
| Zfp3613       | -4.981 | -4.981 | -2.660 | -2.343 | -4.972 | -3.862 | -4.629 | -4.965 | -4.981 | -4.981 | 333473 | NA       | NM_001009549_X_-1  |
| Unc13d        | 5.012  | 4.854  | 5.151  | 5.077  | 5.336  | 5.209  | 5.092  | 4.820  | 5.728  | 5.432  | 70450  | UNC13D   | NM_001009573_11_-1 |
| Armxc5        | 3.224  | 3.632  | 2.812  | 2.728  | 3.299  | 3.269  | 2.946  | 2.959  | 3.326  | 3.002  | 494468 | ARMCX5   | NM_001009575_X_+1  |
| Sept11        | 6.792  | 6.153  | 4.378  | 3.923  | 6.030  | 5.210  | 5.223  | 5.326  | 6.335  | 5.977  | 52398  | SEPT11   | NM_001009818_5_+1  |
| A3galt2       | -4.981 | -4.981 | -2.508 | -2.579 | -4.832 | -4.499 | -4.955 | -4.968 | -2.598 | -4.981 | 215493 | A3GALT2  | NM_001009819_4_+1  |
| Mief2         | 2.287  | 2.466  | 2.325  | 2.142  | 3.088  | 2.708  | 2.414  | 2.235  | 3.195  | 2.832  | 237781 | MIEF2    | NM_001009927_11_+1 |
| Brsk2         | -4.407 | -4.761 | -4.739 | -4.911 | -4.978 | -4.979 | -4.739 | -4.891 | -4.855 | -4.539 | 75770  | BRSK2    | NM_001009929_7_+1  |
| Brsk2         | -0.938 | -0.639 | -2.584 | -1.544 | -1.350 | -1.189 | -1.487 | -2.773 | -1.925 | -4.951 | 75770  | BRSK2    | NM_001009930_7_+1  |
| Txnip         | 7.127  | 7.188  | 6.191  | 6.209  | 7.152  | 7.146  | 7.280  | 7.223  | 8.224  | 8.022  | 56338  | TXNIP    | NM_001009935_3_+1  |
| Il19          | -4.981 | -4.981 | -4.948 | -4.948 | -4.616 | -4.645 | -4.535 | -4.923 | -3.925 | -4.981 | 329244 | IL19     | NM_001009940_1_-1  |
| Dock11        | 4.693  | 4.794  | 6.322  | 5.977  | 6.407  | 6.205  | 6.236  | 6.225  | 6.631  | 7.114  | 75974  | DOCK11   | NM_001009947_X_+1  |
| Slc25a51      | 5.368  | 5.369  | 4.603  | 4.847  | 5.157  | 5.271  | 5.027  | 5.343  | 4.980  | 5.072  | 230125 | SLC25A51 | NM_001009949_4_-1  |
| Cep44         | 3.836  | 3.826  | 2.989  | 2.868  | 3.224  | 3.182  | 3.312  | 3.001  | 3.047  | 2.854  | 382010 | CEP44    | NM_001009951_8_-1  |
| Slc10a7       | -3.649 | -3.549 | -4.502 | -4.720 | -2.270 | -1.955 | -4.185 | -1.332 | -4.216 | -3.459 | 76775  | SLC10A7  | NM_001009981_8_+1  |
| Ficd          | 2.361  | 2.031  | 1.949  | 1.923  | 1.585  | 1.617  | 2.060  | 1.708  | 3.211  | 2.699  | 231630 | FICD     | NM_001010825_5_+1  |
| Kctd14        | -0.841 | -1.179 | -0.859 | -3.755 | -1.377 | -0.898 | -2.784 | -0.297 | -1.925 | -1.233 | 233529 | KCTD14   | NM_001010826_7_+1  |
| Mdc1          | 3.355  | 3.368  | 2.914  | 3.035  | 3.690  | 3.711  | 3.763  | 3.552  | 3.377  | 3.291  | 240087 | MDC1     | NM_001010833_17_+1 |
| Ppp1r13l      | -3.843 | -1.045 | -1.681 | -0.399 | -1.091 | -2.321 | -2.014 | -1.874 | -0.737 | -0.308 | 333654 | PPP1R13L | NM_001010836_7_+1  |
| Mrps33        | 3.682  | 3.809  | 2.865  | 2.645  | 2.687  | 2.453  | 3.005  | 2.380  | 1.557  | 1.157  | 14548  | MRPS33   | NM_001010930_6_-1  |
| Hrh2          | 2.608  | 3.023  | 2.980  | 2.873  | 2.934  | 2.981  | 2.325  | 2.972  | 2.512  | 2.509  | 15466  | HRH2     | NM_001010973_13_+1 |
| Olfr456       | -2.134 | -0.198 | -4.302 | -4.157 | -4.598 | -4.265 | -4.725 | -4.834 | -4.981 | -3.816 | 259144 | NA       | NM_001011528_6_-1  |
| Xkr7          | -4.981 | -4.981 | -4.981 | -4.981 | -4.980 | -4.969 | -4.053 | -4.923 | -4.981 | -4.981 | 228787 | XKR7     | NM_001011732_2_+1  |
| Olfr115       | -4.981 | -4.981 | -4.981 | -4.981 | -4.917 | -4.950 | -4.981 | -4.981 | -4.981 | -4.981 | 257908 | NA       | NM_001011753_17_-1 |
| Olfr735       | -4.981 | -4.981 | -2.526 | -3.710 | -4.981 | -4.981 | -4.981 | -4.981 | -4.981 | -4.981 | 257909 | OR4Q3    | NM_001011754_14_-1 |
| Olfr212       | -3.563 | -4.981 | -3.214 | -3.984 | -4.255 | -4.814 | -3.419 | -4.104 | -4.981 | -2.696 | 258019 | NA       | NM_001011800_6_+1  |
| Xkr9          | 0.514  | -1.137 | -4.981 | -4.981 | -4.981 | -4.981 | -4.981 | -4.981 | -4.981 | -4.981 | 381246 | XKR9     | NM_001011873_1_+1  |
| Rnase12       | 0.384  | -1.901 | -2.253 | -4.548 | -1.363 | -3.617 | -1.415 | -2.992 | -2.685 | -4.981 | 497106 | RNASE12  | NM_001011875_14_-1 |
| Trex1         | 9.692  | 10.021 | 8.212  | 7.966  | 8.260  | 7.663  | 8.415  | 8.098  | 8.713  | 8.218  | 22040  | TREX1    | NM_001012236_9_-1  |
| Birc5         | -2.800 | -1.909 | -0.213 | 0.233  | 0.295  | -0.203 | 0.735  | -0.464 | -0.036 | -0.257 | 11799  | BIRC5    | NM_001012273_11_+1 |
| Nsrp1         | 6.008  | 5.895  | 5.428  | 5.522  | 5.708  | 5.780  | 5.784  | 5.490  | 4.756  | 4.658  | 237859 | NSRP1    | NM_001012309_11_-1 |
| Slc25a47      | -1.576 | -1.137 | -0.933 | -1.948 | -1.024 | -3.023 | -2.047 | -3.639 | -2.379 | -3.229 | 104910 | SLC25A47 | NM_001012310_12_+1 |
| Pgbd1         | -0.688 | 0.138  | -1.748 | -1.685 | -2.030 | -4.056 | -3.467 | -1.183 | -4.981 | -1.523 | 319207 | PGBD1    | NM_001012311_13_-1 |
| Sctr          | -2.647 | -4.981 | -4.976 | -4.882 | -4.843 | -4.485 | -4.981 | -4.981 | -3.750 | -2.152 | 319229 | SCTR     | NM_001012322_1_+1  |
| Ecm2          | -4.981 | -4.981 | -3.089 | -4.818 | -3.492 | -3.927 | -3.938 | -3.430 | -3.340 | -4.227 | 407800 | ECM2     | NM_001012324_13_+1 |
| Zfp708        | -4.469 | -0.774 | -4.419 | -2.665 | -4.596 | -4.904 | -2.850 | -2.997 | -1.665 | -0.981 | 432769 | NA       | NM_001012325_13_-1 |
| Zbtb18        | 5.070  | 5.092  | 3.305  | 3.412  | 5.204  | 4.731  | 4.889  | 4.261  | 3.898  | 4.157  | 30928  | ZBTB18   | NM_001012330_1_+1  |
| Mdk           | -4.738 | -4.752 | -4.851 | -3.590 | -1.134 | -3.591 | -4.813 | -4.947 | -4.799 | -4.938 | 17242  | MDK      | NM_001012335_2_-1  |
| Mdk           | -2.593 | -4.739 | -3.595 | -1.894 | 2.834  | -0.023 | -2.013 | -4.845 | -4.793 | -4.934 | 17242  | MDK      | NM_001012336_2_-1  |
| Slc2a9        | -0.871 | -2.724 | -2.222 | -2.867 | -3.839 | -2.400 | -2.041 | -4.880 | -0.174 | 0.136  | 117591 | SLC2A9   | NM_001012363_5_-1  |
| Hacd1         | 3.341  | 3.979  | 0.209  | 1.492  | -1.184 | 0.497  | 1.776  | 3.054  | 2.134  | 2.065  | 30963  | HACD1    | NM_001012396_2_-1  |
| AU022252      | 3.625  | 3.810  | 2.690  | 3.090  | 2.721  | 3.106  | 2.612  | 2.983  | 2.111  | 2.765  | 230696 | C1orf50  | NM_001012400_4_-1  |
| Hspb6         | 2.506  | 1.414  | 1.954  | 1.962  | 2.511  | 1.987  | 2.382  | 1.013  | 1.581  | 0.680  | 243912 | HSPB6    | NM_001012401_7_+1  |
| Hs3st6        | -3.189 | -1.918 | -4.968 | -2.652 | -3.677 | 3.797  | -4.937 | -0.189 | -2.598 | -0.830 | 328779 | H3S3T6   | NM_001012402_17_+1 |
| Kctd14        | 3.869  | 1.440  | 3.216  | 2.742  | 1.236  | -4.398 | 2.083  | 1.083  | -1.070 | -3.976 | 233529 | KCTD14   | NM_001012434_7_+1  |
| Zfp708        | -2.157 | -2.805 | -2.666 | -4.171 | -1.544 | -1.850 | -1.807 | -3.554 | -4.025 | -4.173 | 432769 | NA       | NM_001012448_13_-1 |
| Zfp708        | -0.816 | -3.477 | -3.238 | -2.603 | -2.842 | -4.747 | -3.146 | -4.853 | -0.306 | -1.019 | 432769 | NA       | NM_001012449_13_-1 |
| Ankrd6        | -4.981 | -4.981 | -4.762 | -2.752 | -4.826 | -4.941 | -4.952 | -4.981 | -4.933 | -4.835 | 140577 | ANKRD6   | NM_001012450_4_-1  |
| Ankrd6        | -4.981 | -4.981 | -0.579 | -0.439 | -2.610 | -0.968 | -2.984 | -3.283 | -4.030 | -1.328 | 140577 | ANKRD6   | NM_001012451_4_-1  |
| Fut10         | -2.229 | 1.079  | -3.768 | 0.955  | -3.465 | 0.505  | -1.327 | 0.295  | -2.826 | 2.147  | 171167 | FUT10    | NM_001012517_8_+1  |

|               |        |        |        |        |        |        |        |        |        |        |           |          |                    |
|---------------|--------|--------|--------|--------|--------|--------|--------|--------|--------|--------|-----------|----------|--------------------|
| Ehmt1         | -2.284 | 1.265  | -0.126 | 1.111  | 1.927  | 2.722  | -0.416 | -0.186 | 1.988  | 1.591  | 77683     | EHMT1    | NM_001012518_2_-1  |
| Klri1         | -0.861 | 0.299  | 5.991  | 5.941  | 5.496  | 4.346  | 4.421  | 2.449  | -4.190 | -2.647 | 503550    | NA       | NM_001012520_6_-1  |
| Acd           | 6.000  | 5.994  | 5.334  | 5.232  | 5.199  | 5.079  | 4.847  | 5.004  | 4.303  | 4.420  | 497652    | ACD      | NM_001012638_8_-1  |
| AY761185      | -4.981 | -4.981 | -4.871 | -2.710 | -4.800 | 0.301  | -4.796 | 0.013  | -4.981 | -4.981 | 100503970 | NA       | NM_001012640_8_-1  |
| Smim19        | -0.704 | -4.543 | -4.836 | -1.381 | -1.580 | -1.253 | -2.684 | -1.677 | -2.800 | -4.960 | 102032    | SMIM19   | NM_001012667_8_-1  |
| Adcy5         | 1.645  | 1.860  | -4.559 | -4.177 | -4.409 | -4.533 | -4.933 | -4.344 | -4.981 | -3.853 | 224129    | ADCY5    | NM_001012765_16_+1 |
| Ear12         | -4.921 | -4.981 | -4.970 | -4.658 | -4.957 | -1.658 | -4.949 | -4.634 | -4.977 | -4.888 | 503845    | NA       | NM_001012766_14_+1 |
| Zfp787        | 2.499  | 2.331  | 2.950  | 2.692  | 2.712  | 2.472  | 2.771  | 2.543  | 2.873  | 2.928  | 67109     | ZNF787   | NM_001013012_7_-1  |
| Lrrn4cl       | -1.800 | -1.943 | -2.235 | -2.169 | -2.312 | -2.376 | -2.303 | -2.714 | -1.712 | -0.281 | 68852     | LRRN4CL  | NM_001013019_19_+1 |
| Odf3b         | -4.981 | -2.437 | -4.695 | -3.774 | -4.990 | -4.199 | -4.468 | -4.004 | -4.981 | -4.981 | 70113     | ODF3B    | NM_001013022_15_-1 |
| Mterf1a       | 2.667  | 2.305  | 1.875  | 0.540  | 2.229  | 1.418  | 2.063  | 0.881  | 1.485  | 1.270  | 545725    | MTERF1   | NM_001013023_5_-1  |
| Tgfbra1       | 2.821  | 3.095  | 3.619  | 2.728  | 3.854  | 3.185  | 3.898  | 3.405  | 4.728  | 4.472  | 73122     | TGFBRA1  | NM_001013025_1_-1  |
| Ttf2          | 2.073  | 1.914  | 3.094  | 2.863  | 3.554  | 2.929  | 3.627  | 2.731  | 3.590  | 2.893  | 74044     | TF2      | NM_001013026_3_-1  |
| Tmem263       | 4.162  | 4.345  | 3.637  | 3.186  | 3.302  | 2.759  | 2.206  | 2.471  | 1.042  | 2.560  | 103266    | TMEM263  | NM_001013028_10_+1 |
| Ctc1          | 1.713  | 1.856  | 2.129  | 2.368  | 3.400  | 3.615  | 3.323  | 3.548  | 3.006  | 3.514  | 68964     | CTC1     | NM_001013256_11_+1 |
| Npcd          | -4.981 | -4.981 | -0.885 | -3.963 | -1.998 | -3.553 | -2.079 | -4.468 | -2.991 | -2.522 | 504193    | NA       | NM_001013360_15_-1 |
| Npcd          | -4.981 | -4.981 | -3.031 | -3.396 | -3.779 | -4.138 | -4.467 | -4.605 | -4.763 | -2.002 | 504193    | NA       | NM_001013362_15_-1 |
| Osm           | -1.434 | -3.315 | -0.319 | 1.201  | 2.393  | 3.140  | 6.377  | 4.574  | 7.138  | 6.956  | 18413     | OSM      | NM_001013365_11_+1 |
| Wdr91         | 4.533  | 4.565  | 5.489  | 5.666  | 4.254  | 4.703  | 3.882  | 4.049  | 3.513  | 3.462  | 101240    | WDR91    | NM_001013366_6_-1  |
| Prkaa1        | 4.900  | 5.162  | 5.264  | 5.297  | 5.034  | 5.112  | 5.062  | 5.070  | 5.573  | 5.850  | 105787    | PRKAA1   | NM_001013367_15_+1 |
| E2f8          | -1.860 | -2.437 | 1.651  | 2.231  | 2.969  | 2.373  | 2.551  | 2.275  | 2.797  | 2.658  | 108961    | E2F8     | NM_001013368_7_-1  |
| Pfdn4         | -0.814 | -1.613 | -0.651 | 0.180  | -0.987 | 0.870  | -2.217 | 0.740  | -0.561 | -3.133 | 109054    | PFND4    | NM_001013369_2_+1  |
| Sesn1         | 4.786  | 4.899  | 3.501  | 3.999  | 5.475  | 5.846  | 5.039  | 5.757  | 4.914  | 5.668  | 140742    | SES1     | NM_001013370_10_+1 |
| Dtx3l         | 4.975  | 4.327  | 5.885  | 5.617  | 5.766  | 5.134  | 6.130  | 5.790  | 6.950  | 6.796  | 209200    | DTX3L    | NM_001013371_16_-1 |
| Nrp           | 5.447  | 4.725  | 4.609  | 4.218  | 4.142  | 3.626  | 4.225  | 3.257  | 1.342  | 0.290  | 654309    | NA       | NM_001013372_12_-1 |
| Lman2l        | 5.123  | 5.538  | 4.151  | 4.665  | 4.532  | 5.028  | 4.469  | 5.043  | 5.139  | 5.793  | 214895    | LMAN2L   | NM_001013374_1_-1  |
| Utp18         | 5.215  | 5.557  | 5.335  | 5.323  | 5.504  | 5.257  | 5.337  | 5.318  | 4.929  | 4.781  | 217109    | UTP18    | NM_001013375_11_-1 |
| Rpp38         | 4.507  | 4.694  | 2.852  | 2.800  | 3.095  | 2.909  | 2.564  | 2.930  | 1.355  | 1.401  | 227522    | RPP38    | NM_001013376_2_-1  |
| Arhgef39      | 2.821  | 3.188  | 4.377  | 3.934  | 4.087  | 3.562  | 3.516  | 2.361  | 1.863  | 0.936  | 230098    | ARHGEF39 | NM_001013377_4_-1  |
| Usp1l         | 2.353  | 2.287  | 2.124  | 1.262  | 3.216  | 2.230  | 2.599  | 1.010  | 0.672  | 1.097  | 231915    | USP1L    | NM_001013378_5_+1  |
| Zfp930        | 3.981  | 3.532  | 3.669  | 3.502  | 4.100  | 4.017  | 3.822  | 3.529  | 2.648  | 3.141  | 234358    | NA       | NM_001013379_8_+1  |
| Dync1li2      | 4.573  | 4.745  | 5.989  | 5.915  | 4.881  | 4.675  | 5.207  | 5.241  | 5.634  | 5.753  | 234663    | DYNC1LI2 | NM_001013380_8_-1  |
| Rsad1         | 1.249  | 0.476  | 0.465  | -0.836 | 1.067  | -1.014 | 0.959  | -0.532 | -0.504 | -3.853 | 237926    | RSAD1    | NM_001013381_11_-1 |
| Podnl1        | -3.668 | -1.951 | -4.031 | -3.746 | -3.911 | -0.339 | -3.907 | 0.094  | -3.531 | -4.981 | 244550    | PODNL1   | NM_001013384_8_+1  |
| Grm4          | -4.981 | -4.981 | -4.981 | -4.981 | -4.200 | -4.698 | -4.945 | -4.949 | -4.981 | -4.981 | 268934    | GRM4     | NM_001013385_17_-1 |
| Rasl10b       | -4.981 | -4.981 | -4.797 | -2.717 | -2.566 | -4.718 | -4.841 | -4.977 | -3.750 | -2.969 | 276952    | RASL10B  | NM_001013386_11_+1 |
| Zfp182        | 3.896  | 3.693  | 2.800  | 2.367  | 3.023  | 2.963  | 3.193  | 2.122  | 2.786  | 2.500  | 319535    | ZNF182   | NM_001013387_X_-1  |
| Mrs2          | 3.473  | 3.606  | 3.767  | 3.778  | 3.643  | 3.655  | 3.620  | 3.489  | 3.999  | 3.682  | 380836    | MRS2     | NM_001013389_13_-1 |
| Scn4b         | -4.981 | -4.981 | 0.657  | 1.287  | 0.285  | -0.798 | 0.794  | -0.019 | -3.750 | -1.992 | 399548    | SCN4B    | NM_001013390_9_+1  |
| Cpsf6         | 6.356  | 6.600  | 6.540  | 6.610  | 6.427  | 6.512  | 6.344  | 6.522  | 6.087  | 6.465  | 432508    | CPSF6    | NM_001013391_10_-1 |
| Tcaim         | 2.657  | 3.152  | 2.461  | 2.372  | 2.531  | 2.694  | 1.955  | 1.999  | 1.553  | 2.220  | 382117    | TCAIM    | NM_001013405_9_+1  |
| Neurl4        | 1.345  | 1.453  | 2.194  | 1.988  | 1.739  | 1.240  | 1.112  | 1.896  | 2.508  | 2.657  | 216860    | NEURL4   | NM_001013414_11_+1 |
| Ric8b         | 3.243  | 3.385  | 2.840  | 2.441  | 2.962  | 3.163  | 3.330  | 2.150  | 3.220  | 3.412  | 237422    | RIC8B    | NM_001013441_10_+1 |
| Olfr112       | -4.981 | -4.981 | -4.981 | -4.981 | -4.886 | -3.258 | -4.967 | -4.974 | -4.981 | -4.981 | 258096    | NA       | NM_001013575_17_-1 |
| Inip          | 5.363  | 5.332  | 6.315  | 6.315  | 6.199  | 5.929  | 6.208  | 6.039  | 5.582  | 5.682  | 66209     | INIP     | NM_001013577_4_-1  |
| Pard3         | -4.981 | -4.981 | -4.981 | -4.981 | -4.492 | -4.186 | -4.981 | -3.591 | -4.981 | -4.981 | 93742     | PARD3    | NM_001013580_8_+1  |
| Pard3         | -1.969 | -0.677 | -2.576 | -4.220 | -3.181 | -2.683 | -3.220 | -4.025 | -4.981 | -4.981 | 93742     | PARD3    | NM_001013581_8_+1  |
| Vmo1          | -4.981 | -4.981 | -3.901 | -4.942 | -3.737 | -3.968 | -4.037 | -4.497 | -4.981 | -4.981 | 327956    | VMO1     | NM_001013607_11_-1 |
| Ercc6l2       | 3.881  | 4.092  | 3.587  | 3.623  | 3.371  | 3.352  | 3.240  | 3.237  | 3.245  | 3.196  | 76251     | ERCC6L2  | NM_001013608_13_+1 |
| Trim6         | -0.946 | 1.274  | 1.228  | 1.654  | 1.788  | -0.882 | 1.482  | -1.293 | -2.119 | -0.690 | 94088     | TRIM6    | NM_001013616_7_+1  |
| Ddn           | 1.892  | 0.947  | -4.975 | -4.975 | -4.912 | -4.039 | -4.941 | -4.830 | -4.394 | -4.981 | 13199     | DDN      | NM_001013741_15_-1 |
| Zfp57         | -4.751 | -4.981 | -2.260 | -2.278 | -4.068 | -3.552 | -4.974 | -4.977 | -4.981 | -4.981 | 22715     | ZFP57    | NM_001013745_17_+1 |
| Tmem151b      | -4.981 | -4.981 | -3.025 | -3.521 | -0.446 | -0.856 | -2.590 | -3.532 | -4.981 | -4.981 | 210573    | TMEM151B | NM_001013749_17_-1 |
| Syna          | -4.981 | -4.981 | -1.562 | -2.340 | -4.134 | -4.333 | -4.085 | -4.688 | -4.394 | -2.910 | 214292    | NA       | NM_001013751_5_-1  |
| Pcdh17        | -3.843 | -1.944 | -3.253 | -3.943 | -3.267 | -2.968 | -2.704 | -1.571 | -3.115 | -1.026 | 219228    | PCDH17   | NM_001013753_14_+1 |
| 5730409E04Rik | 1.286  | 0.809  | -1.263 | 0.594  | -0.359 | -1.026 | -0.696 | -1.015 | -0.814 | -4.773 | 230757    | C1orf216 | NM_001013755_4_+1  |
| Grhl3         | -0.950 | -0.199 | -4.919 | -2.877 | -2.031 | -3.294 | -4.906 | -2.332 | -4.981 | -4.981 | 230824    | GRHL3    | NM_001013756_4_-1  |
| Rsl1          | 2.919  | 2.586  | 2.488  | 2.603  | 2.584  | 2.663  | 2.665  | 2.428  | 2.021  | 2.686  | 380855    | NA       | NM_001013769_13_+1 |
| Lipo3         | 4.451  | 4.567  | 4.008  | 4.228  | 3.963  | 4.235  | 3.929  | 4.264  | 3.572  | 4.963  | 381236    | NA       | NM_001013770_19_-1 |
| Gm973         | -4.981 | -4.981 | -2.669 | -2.931 | -4.979 | -4.775 | -2.624 | -4.600 | -4.190 | -4.981 | 381260    | KIAA2012 | NM_001013771_1_+1  |
| Nxpe5         | -0.557 | 1.119  | -1.452 | 2.759  | 2.890  | 5.902  | 2.432  | 3.240  | 1.271  | 1.742  | 381680    | NA       | NM_001013773_5_+1  |
| Zfp488        | 2.256  | 1.547  | 2.722  | 2.332  | 3.027  | 2.592  | 2.248  | 2.022  | 2.149  | 2.014  | 382867    | ZNF488   | NM_001013777_14_-1 |
| Tvp23a        | 2.184  | 2.029  | 2.346  | 2.593  | 3.365  | 3.423  | 2.763  | 2.289  | 2.677  | 2.315  | 383103    | TVP23A   | NM_001013778_16_-1 |
| Aim2          | 5.210  | 4.642  | 6.322  | 5.484  | 6.184  | 5.368  | 5.811  | 4.990  | 5.603  | 4.724  | 383619    | AIM2     | NM_001013779_1_+1  |
| Slc25a34      | -3.668 | -4.981 | -4.926 | -4.926 | -4.418 | -4.955 | -4.315 | -4.969 | -4.981 | -4.342 | 384071    | SLC25A34 | NM_001013780_4_-1  |
| Fam71b        | 1.324  | -0.104 | -3.946 | -2.384 | -0.336 | 2.409  | -1.928 | -1.387 | -4.981 | -0.956 | 432552    | FAM71B   | NM_001013783_11_+1 |
| Ccdc92b       | -2.842 | -2.681 | -2.153 | -3.181 | -4.365 | -3.830 | -3.154 | -2.934 | -0.633 | -1.640 | 432582    | CDC92B   | NM_001013784_11_+1 |
| Zscan26       | 4.482  | 4.310  | 3.902  | 3.670  | 4.567  | 4.814  | 4.172  | 3.966  | 2.913  | 3.446  | 432731    | ZSCAN26  | NM_001013786_13_-1 |
| Otulin        | 6.965  | 6.917  | 6.740  | 6.817  | 7.832  | 7.722  | 7.250  | 7.013  | 6.692  | 6.472  | 432940    | OTULIN   | NM_001013792_15_-1 |
| Mettl21c      | -4.981 | -2.344 | -4.205 | -4.980 | -4.392 | -4.988 | -4.644 | -4.188 | -3.373 | -4.981 | 433294    | METTL21C | NM_001013799_1_-1  |
| MacroD2       | -2.409 | -2.445 | -4.957 | -4.580 | -4.976 | -3.988 | -4.978 | -4.976 | -4.981 | -4.981 | 72899     | MACROD2  | NM_001013802_2_+1  |
| Ankrd13c      | 3.123  | 3.696  | 4.163  | 4.284  | 4.134  | 4.367  | 3.844  | 4.313  | 4.298  | 4.740  | 433667    | ANKRD13C | NM_001013806_3_+1  |
| Fam169b       | 5.391  | 5.979  | -1.967 | 0.034  | 1.317  | 1.751  | -0.369 | 2.227  | -2.315 | -1.610 | 434197    | NA       | NM_001013811_7_+1  |
| Mam12         | 2.993  | 2.759  | 2.192  | 1.792  | -1.911 | 0.266  | -0.291 | 1.681  | -0.539 | 0.921  | 270118    | NA       | NM_001013813_9_+1  |

|               |        |        |        |        |        |        |        |        |        |        |        |          |                     |
|---------------|--------|--------|--------|--------|--------|--------|--------|--------|--------|--------|--------|----------|---------------------|
| Sp140         | 7.551  | 6.445  | 6.816  | 5.989  | 6.848  | 6.327  | 6.011  | 5.525  | 6.146  | 5.327  | 434484 | SP140    | NM_001013817_1_+_1  |
| Shf           | -0.328 | -0.879 | -2.079 | -2.890 | -1.278 | -2.530 | -1.417 | -2.325 | -0.235 | 0.015  | 435684 | SHF      | NM_001013829_2_-_1  |
| Gpr31b        | -1.636 | -0.511 | 0.662  | 1.606  | -1.289 | -0.556 | -0.699 | 0.485  | -0.397 | 0.238  | 436440 | GPR31    | NM_001013832_17_-_1 |
| Prkg1         | -4.981 | -4.981 | -4.284 | -4.899 | -4.682 | -4.844 | -4.684 | -4.826 | -4.981 | -4.981 | 19091  | PRKG1    | NM_001013833_19_-_1 |
| Dyrk2         | 3.549  | 2.562  | 2.989  | 2.479  | 3.502  | 2.894  | 3.797  | 3.214  | 4.276  | 4.054  | 69181  | DYRK2    | NM_001014390_10_-_1 |
| Adgrf3        | -4.981 | -4.981 | -1.626 | -0.969 | -0.123 | -0.245 | -1.211 | -3.099 | -4.981 | -3.210 | 381628 | ADGRF3   | NM_001014394_5_-_1  |
| Zfp985        | -3.668 | 3.846  | -4.845 | 2.157  | -2.984 | 2.731  | -4.867 | 2.521  | -4.981 | 3.784  | 433804 | ZNF616   | NM_001014397_4_+_1  |
| Trcg1         | -3.563 | -2.681 | -4.981 | -4.981 | -4.586 | -4.826 | -3.749 | -4.979 | -4.981 | -4.981 | 541610 | NA       | NM_001014398_9_+_1  |
| Abi3bp        | -4.981 | -4.981 | -4.742 | -3.290 | -4.114 | -3.417 | -3.131 | -3.668 | -4.981 | -3.481 | 320712 | NA       | NM_001014399_16_+_1 |
| Abi3bp        | -4.981 | -4.981 | -4.981 | -4.976 | -4.964 | -4.905 | -4.975 | -4.924 | -4.981 | -4.957 | 320712 | NA       | NM_001014422_16_+_1 |
| Abi3bp        | -2.483 | -4.981 | -4.981 | -4.979 | -4.979 | -4.979 | -4.981 | -4.980 | -4.981 | -4.981 | 320712 | NA       | NM_001014423_16_+_1 |
| Abi3bp        | -4.981 | -4.981 | -4.981 | -4.977 | -4.970 | -4.949 | -4.918 | -3.099 | -4.981 | -4.961 | 320712 | NA       | NM_001014424_16_+_1 |
| Scn2b         | 1.307  | 1.012  | 1.760  | 3.046  | 3.255  | 3.902  | 3.283  | 2.809  | -0.478 | 0.027  | 72821  | SCN2B    | NM_001014761_9_+_1  |
| 4930404N11Rik | -1.292 | -2.153 | -1.026 | -1.717 | -1.364 | -1.432 | -0.820 | -2.183 | 0.525  | -0.488 | 432479 | C19orf71 | NM_001014836_10_-_1 |
| Zmynd12       | -1.933 | -4.981 | -4.485 | -4.842 | -4.781 | -4.229 | -4.976 | -4.904 | -4.981 | -4.342 | 332934 | ZMYND12  | NM_001014900_4_+_1  |
| Snx13         | 4.707  | 4.725  | 5.698  | 5.661  | 5.594  | 5.995  | 5.482  | 5.429  | 5.655  | 6.068  | 217463 | SNX13    | NM_001014973_12_+_1 |
| Tll4          | 1.378  | 1.136  | 3.653  | 3.342  | 2.068  | 1.125  | 2.038  | 2.351  | 2.544  | 2.433  | 67534  | TLL4     | NM_001014974_1_+_1  |
| Espl1         | 0.667  | 0.928  | 2.754  | 2.703  | 4.825  | 4.561  | 4.245  | 3.301  | 4.236  | 3.954  | 105988 | ESPL1    | NM_001014976_15_+_1 |
| Wdr7          | 3.641  | 3.784  | 3.497  | 3.646  | 3.916  | 4.015  | 3.932  | 4.043  | 4.785  | 5.229  | 104082 | WDR7     | NM_001014981_18_+_1 |
| Fam189b       | 2.881  | 2.970  | 3.555  | 3.476  | 3.235  | 3.826  | 3.230  | 3.626  | 3.387  | 3.465  | 68521  | FAM189B  | NM_001014995_3_+_1  |
| Cenpj         | 1.928  | 1.699  | 2.320  | 1.954  | 3.098  | 2.662  | 2.576  | 1.939  | 2.533  | 2.039  | 219103 | CENPJ    | NM_001014996_14_-_1 |
| Zfyve28       | 1.521  | 1.009  | -0.516 | -1.003 | 2.022  | 0.914  | 2.044  | 3.241  | 3.901  | 4.676  | 231125 | ZFYVE28  | NM_001015039_5_-_1  |
| Rap1gap2      | 3.389  | 3.574  | 1.341  | 2.024  | 3.900  | 3.628  | 5.329  | 5.177  | 6.756  | 6.699  | 380711 | RAP1GAP2 | NM_001015046_11_-_1 |
| G2e3          | 2.856  | 2.609  | 2.838  | 3.209  | 3.559  | 3.102  | 3.488  | 3.173  | 2.731  | 3.363  | 217558 | G2E3     | NM_001015099_12_+_1 |
| Vprbp         | 3.479  | 3.329  | 1.195  | 1.974  | 1.270  | 1.534  | 1.803  | 2.289  | 1.251  | 1.996  | 321006 | DCAF1    | NM_001015507_9_+_1  |
| E130308A19Rik | 2.889  | 3.397  | 2.204  | 2.196  | 2.092  | 2.209  | 2.221  | 3.054  | 1.798  | 1.745  | 230259 | NA       | NM_001015681_4_+_1  |
| Tyw1          | 4.335  | 4.623  | 4.073  | 4.261  | 4.420  | 4.361  | 4.210  | 4.564  | 4.821  | 4.781  | 100929 | TYW1     | NM_001015876_5_+_1  |
| Taf9          | 3.183  | 3.402  | 2.947  | 3.198  | 3.832  | 3.510  | 2.964  | 2.491  | 2.580  | 2.424  | 108143 | TAf9     | NM_001015889_13_+_1 |
| Ear4          | -4.981 | -3.293 | -4.977 | -4.977 | -4.981 | -4.981 | -4.981 | -4.981 | -4.981 | -4.981 | 53877  | NA       | NM_001017422_14_+_1 |
| Kdm6b         | 4.141  | 4.244  | 4.957  | 4.778  | 5.406  | 5.570  | 5.534  | 5.024  | 4.579  | 4.851  | 216850 | KDM6B    | NM_001017426_11_-_1 |
| Cox17         | 6.823  | 6.664  | 6.849  | 6.745  | 6.626  | 6.843  | 6.750  | 6.321  | 5.120  | 5.056  | 12856  | COX17    | NM_001017429_16_+_1 |
| Btbd11        | -2.274 | -4.981 | -4.189 | -4.936 | -3.517 | -4.645 | -2.437 | -3.411 | -2.871 | -3.498 | 74007  | BTBD11   | NM_001017525_10_+_1 |
| Zscan18       | 1.626  | 2.145  | -0.956 | 0.057  | 0.906  | 1.566  | -0.102 | 0.767  | -1.951 | -0.622 | 232875 | ZSCAN18  | NM_001017955_7_-_1  |
| Lamp2         | 7.086  | 7.095  | 5.244  | 5.495  | 4.570  | 4.867  | 5.862  | 6.255  | 7.508  | 7.482  | 16784  | LAMP2    | NM_001017959_X_-_1  |
| Ddi2          | 4.860  | 4.921  | 4.714  | 4.732  | 5.735  | 5.963  | 5.222  | 5.575  | 6.296  | 6.435  | 68817  | DDI2     | NM_001017966_4_-_1  |
| Zdhhc18       | 2.984  | 3.236  | 3.714  | 3.870  | 3.985  | 4.194  | 4.269  | 4.845  | 4.339  | 4.768  | 503610 | ZDHHC18  | NM_001017968_4_-_1  |
| Foxred2       | 4.435  | 4.686  | 2.388  | 1.414  | 2.979  | 2.594  | 3.456  | 2.917  | 5.314  | 4.941  | 239554 | FOXRED2  | NM_001017983_15_-_1 |
| C2cd3         | 4.137  | 4.419  | 5.018  | 4.987  | 4.711  | 4.387  | 4.383  | 4.428  | 4.866  | 5.164  | 277939 | C2CD3    | NM_001017985_7_+_1  |
| Izumoi        | -0.572 | -1.106 | -3.248 | -4.309 | -3.586 | -4.291 | -4.616 | -4.506 | -2.158 | -2.795 | 73456  | IZUMO1   | NM_001018013_7_+_1  |
| Sp3           | 4.626  | 4.378  | 4.784  | 4.806  | 5.124  | 4.649  | 4.950  | 5.343  | 5.921  | 6.057  | 20687  | SP3      | NM_001018042_2_-_1  |
| Cxx1b         | 3.406  | 3.176  | 5.481  | 5.731  | 3.086  | 2.927  | 2.776  | 4.610  | 2.702  | 3.107  | 553127 | FAM127C  | NM_001018063_X_-_1  |
| Trim15        | -2.739 | -4.981 | -4.178 | -4.389 | -4.853 | -4.367 | -4.521 | -4.923 | -2.450 | -4.139 | 69097  | TRIM15   | NM_001024134_17_-_1 |
| Kbtbd7        | 2.789  | 3.084  | 3.741  | 3.759  | 3.196  | 3.507  | 3.525  | 3.012  | 4.188  | 4.128  | 211255 | KBTBD7   | NM_001024135_14_+_1 |
| Anks6         | 1.581  | 2.164  | -1.437 | 0.365  | 1.122  | 1.478  | -0.957 | -0.818 | -2.736 | -0.585 | 75691  | ANKS6    | NM_001024136_4_-_1  |
| Pla2g4d       | -0.772 | -0.035 | -4.944 | -0.027 | -2.673 | 6.125  | -4.732 | 1.099  | -4.981 | -4.981 | 78390  | PLA2G4D  | NM_001024137_2_-_1  |
| Fbxo10        | -0.251 | 0.483  | 2.327  | 2.468  | 2.617  | 2.279  | 1.620  | 1.800  | 2.427  | 2.722  | 269529 | FBXO10   | NM_001024142_4_-_1  |
| Pla2g4f       | 2.107  | 5.347  | 1.349  | 3.098  | 3.108  | 5.734  | -0.132 | 1.533  | -4.981 | -4.981 | 271844 | PLA2G4F  | NM_001024145_2_-_1  |
| Nufip2        | 5.576  | 5.674  | 6.399  | 6.018  | 6.298  | 6.080  | 6.231  | 6.154  | 6.406  | 6.736  | 68564  | NUFIP2   | NM_001024205_11_+_1 |
| Trappc1       | 6.866  | 6.779  | 6.663  | 6.672  | 6.291  | 6.367  | 6.593  | 6.537  | 6.381  | 6.163  | 245828 | TRAPPC1  | NM_001024206_11_+_1 |
| Gm5431        | -0.239 | 0.354  | 1.672  | 1.296  | 1.929  | 2.566  | 3.699  | 3.900  | 5.260  | 4.797  | 432555 | NA       | NM_001024230_11_-_1 |
| Crls1         | 4.513  | 4.690  | 4.600  | 4.935  | 4.011  | 4.169  | 3.969  | 4.212  | 3.239  | 3.865  | 66586  | CRLS1    | NM_001024385_2_+_1  |
| Add1          | 5.263  | 5.557  | 6.085  | 6.140  | 5.847  | 5.809  | 6.082  | 6.314  | 6.777  | 6.814  | 11518  | ADD1     | NM_001024458_5_+_1  |
| Bcat1         | -1.800 | -3.662 | -4.824 | -1.798 | -4.103 | -1.871 | -4.154 | -2.552 | -4.981 | -4.981 | 12035  | BACAT1   | NM_001024468_6_-_1  |
| Diras2        | 0.229  | 1.275  | -3.198 | -2.850 | -4.172 | -1.100 | -3.641 | -0.017 | -3.491 | -0.635 | 68203  | DIRAS2   | NM_001024474_13_-_1 |
| Cdhr3         | -0.893 | -4.981 | -3.557 | -3.041 | 4.470  | 4.915  | 1.888  | -0.094 | -4.981 | -4.316 | 68764  | CDHR3    | NM_001024478_12_-_1 |
| Dcun1d2       | 2.470  | 2.603  | 2.083  | 1.682  | 1.174  | 1.965  | 0.521  | 1.758  | 1.683  | 2.241  | 102323 | DCUN1D2  | NM_001024504_8_-_1  |
| Brd9          | 5.153  | 4.746  | 4.642  | 4.417  | 5.193  | 4.728  | 5.109  | 4.461  | 4.741  | 4.568  | 105246 | BRD9     | NM_001024508_13_+_1 |
| Fam149b       | 3.656  | 3.396  | 2.232  | 2.378  | 2.163  | 2.461  | 2.410  | 2.267  | 2.547  | 2.887  | 105428 | FAM149B1 | NM_001024512_14_+_1 |
| Larp4         | 4.756  | 4.970  | 5.537  | 5.474  | 5.271  | 5.057  | 5.392  | 5.053  | 5.285  | 5.585  | 207214 | LARP4    | NM_001024526_15_+_1 |
| Snx32         | 2.391  | 2.587  | 1.810  | 1.588  | 2.245  | 2.591  | 1.310  | 1.375  | 2.171  | 2.491  | 225861 | SNX32    | NM_001024560_19_-_1 |
| Cep170b       | 1.782  | 2.092  | 2.433  | 2.199  | 1.290  | 1.132  | 0.506  | 0.287  | -1.080 | -0.044 | 217882 | CEP170B  | NM_001024602_12_+_1 |
| Ankrd28       | 4.047  | 4.335  | 1.208  | 1.893  | 1.716  | 2.356  | 1.759  | 2.192  | 2.550  | 2.594  | 105522 | ANKRD28  | NM_001024604_14_-_1 |
| Pdp2          | 2.860  | 2.533  | 2.889  | 2.550  | 2.509  | 2.100  | 2.660  | 2.354  | 2.498  | 2.526  | 382051 | PDP2     | NM_001024606_8_+_1  |
| Rabl6         | 4.658  | 4.572  | 4.805  | 4.786  | 5.014  | 4.944  | 5.070  | 4.892  | 5.177  | 5.085  | 227624 | RABL6    | NM_001024616_2_-_1  |
| Inpp4b        | 1.548  | 2.727  | -0.004 | 1.065  | 2.278  | 2.024  | 1.434  | 1.627  | 0.723  | 1.692  | 234515 | INPP4B   | NM_001024617_8_+_1  |
| Tsku          | -4.981 | -4.981 | -4.959 | -4.959 | -4.662 | -4.257 | -3.371 | -4.325 | -4.981 | -4.981 | 244152 | TSKU     | NM_001024619_7_-_1  |
| Pcnp          | 6.181  | 6.206  | 6.261  | 5.952  | 6.110  | 5.878  | 6.171  | 5.901  | 5.734  | 5.864  | 76302  | PCNP     | NM_001024622_16_-_1 |
| Cdkl5         | -0.802 | -2.437 | 1.185  | 1.013  | -1.046 | -1.639 | -0.950 | -0.613 | -0.224 | -1.027 | 382253 | CDKL5    | NM_001024624_X_-_1  |
| Zfp873        | 2.756  | 3.066  | 3.184  | 3.290  | 3.325  | 3.084  | 3.204  | 3.042  | 1.598  | 2.739  | 408062 | NA       | NM_001024626_10_+_1 |
| Carmil3       | -4.981 | -4.981 | -0.583 | -1.864 | 1.943  | 1.001  | -0.575 | -2.447 | -3.925 | -4.981 | 268747 | CARMIL3  | NM_001024645_14_+_1 |
| Methig1       | -4.981 | -4.981 | -4.990 | -3.873 | -4.823 | -4.007 | -4.223 | -2.885 | -4.981 | -1.054 | 554292 | NA       | NM_001024672_15_+_1 |
| Ifnl2         | -3.090 | -4.981 | -4.946 | -4.946 | -4.940 | -4.940 | -4.926 | -4.953 | -4.981 | -4.981 | 330496 | IFNL3    | NM_001024673_7_-_1  |
| Cpa2          | -4.981 | -1.370 | 0.726  | 0.561  | -0.370 | -0.767 | -0.294 | -1.888 | -4.394 | -4.342 | 232680 | CPA2     | NM_001024698_6_+_1  |
| Zbtb45        | 2.467  | 2.610  | 2.968  | 3.090  | 3.380  | 2.890  | 3.365  | 3.078  | 3.843  | 3.695  | 232879 | ZBTB45   | NM_001024699_7_-_1  |

|               |        |        |        |        |        |        |        |        |        |        |           |            |                    |
|---------------|--------|--------|--------|--------|--------|--------|--------|--------|--------|--------|-----------|------------|--------------------|
| C1ql4         | -4.981 | -4.981 | -4.609 | -4.317 | -2.870 | -4.311 | -4.515 | -4.934 | -4.981 | -4.981 | 239659    | C1QL4      | NM_001024702_15_-1 |
| Mctp2         | 7.723  | 7.995  | -2.540 | 0.665  | -0.230 | 2.548  | -1.250 | 2.620  | 1.757  | 3.970  | 244049    | MCTP2      | NM_001024703_7_-1  |
| Gm5458        | -4.981 | -4.981 | -4.830 | -4.977 | -4.978 | -4.962 | -4.981 | -4.981 | -4.981 | -4.981 | 432825    | NA         | NM_001024706_14_-1 |
| Gm3696        | 3.010  | 2.168  | 0.609  | -4.051 | -4.946 | -0.764 | -4.962 | -4.489 | -4.981 | -4.940 | 100042149 | NA         | NM_001024712_14_-1 |
| Triobp        | 4.938  | 5.071  | 5.323  | 5.468  | 4.719  | 4.590  | 4.658  | 4.794  | 5.698  | 5.374  | 110253    | TRIOBP     | NM_001024716_15_+1 |
| Gal3st3       | -3.530 | -2.191 | -4.262 | -4.462 | -3.895 | -4.044 | -4.084 | -4.762 | -3.373 | -4.160 | 545276    | GAL3ST3    | NM_001024717_19_+1 |
| Ifi214        | -0.383 | -1.430 | -2.807 | -1.118 | -1.724 | 0.199  | -0.287 | 1.495  | -0.030 | 1.075  | 545384    | IFI16      | NM_001024721_1_-1  |
| Zfp607a       | 2.834  | 3.267  | 2.923  | 3.026  | 3.394  | 3.542  | 3.338  | 3.320  | 3.418  | 3.469  | 545938    | ZNF780A    | NM_001024726_7_+1  |
| C330021F23Rik | 0.902  | 0.501  | 0.994  | 0.619  | 0.528  | -0.086 | 1.128  | 0.265  | 0.063  | 0.038  | 546049    | NA         | NM_001024728_8_+1  |
|               | 2.318  | 2.989  | 1.670  | 1.660  | 1.726  | 1.851  | 1.959  | 1.435  | 0.936  | 1.512  | 100044193 | NA         | NM_001024731_17_+1 |
| Cebpz         | 5.455  | 5.318  | 6.155  | 5.956  | 6.553  | 6.204  | 6.388  | 5.841  | 5.866  | 5.278  | 12607     | CEBPZ      | NM_001024806_17_-1 |
| Adarb1        | -4.045 | -2.957 | -4.436 | -3.267 | -3.707 | -3.842 | -3.435 | -3.922 | -4.137 | -3.165 | 110532    | ADARB1     | NM_001024837_10_-1 |
| Gm128         | -2.134 | -3.267 | -2.219 | -3.757 | -1.521 | -4.071 | -0.506 | -3.858 | -1.589 | -2.923 | 229588    | C1orf56    | NM_001024841_3_-1  |
| Zfp62         | 2.128  | -0.744 | 3.223  | 2.032  | 2.314  | 2.594  | 1.879  | 0.087  | 1.783  | 1.674  | 22720     | ZFP62      | NM_001024846_11_+1 |
| Apol7b        | -4.981 | -4.981 | -1.404 | -1.606 | -3.964 | -1.498 | -3.750 | 0.553  | -4.981 | -1.830 | 278679    | NA         | NM_001024848_15_-1 |
| Gm14325       | 2.417  | 2.875  | 2.838  | 2.884  | 2.792  | 3.122  | 2.951  | 3.135  | 2.577  | 3.218  | 329575    | ZNF442     | NM_001024849_2_-1  |
| Timm9         | 2.479  | 2.314  | 0.558  | 1.263  | 0.261  | 0.291  | 0.899  | 0.681  | -0.363 | 0.540  | 30056     | TIMM9      | NM_001024853_12_-1 |
| Timm9         | 2.548  | 2.485  | 2.157  | 1.727  | 1.369  | 1.332  | 1.500  | 1.664  | 0.908  | 0.881  | 30056     | TIMM9      | NM_001024854_12_-1 |
| Ttbk2         | -2.944 | 2.182  | 2.163  | 2.133  | 1.043  | 2.030  | 0.494  | 1.630  | 1.498  | 2.465  | 140810    | TTBK2      | NM_001024856_2_-1  |
| Ttbk2         | -1.872 | 2.613  | -0.310 | 0.802  | -0.390 | 1.382  | 0.239  | 2.193  | 1.451  | 2.072  | 140810    | TTBK2      | NM_001024857_2_-1  |
| Sept10        | 0.267  | -1.433 | -0.924 | -1.213 | -0.954 | -4.735 | -0.680 | -0.635 | 0.796  | -3.571 | 103080    | SEPT10     | NM_001024910_10_-1 |
| Sept10        | 2.196  | 1.640  | 1.538  | 1.297  | 1.733  | 2.006  | 2.929  | 1.478  | 3.278  | 2.900  | 103080    | SEPT10     | NM_001024911_10_-1 |
| N4bp2         | 2.238  | 2.271  | 3.212  | 3.503  | 3.083  | 3.060  | 2.442  | 2.439  | 2.611  | 3.018  | 333789    | N4BP2      | NM_001024917_5_+1  |
| Rfx4          | -3.843 | -4.890 | -4.751 | -4.958 | -4.971 | -4.971 | -4.981 | -4.981 | -4.981 | -4.981 | 71137     | RFX4       | NM_001024918_10_+1 |
| Bod1          | 4.431  | 3.717  | 3.436  | 3.152  | 3.633  | 3.254  | 3.875  | 3.394  | 3.564  | 3.243  | 69556     | BOD1       | NM_001024919_11_-1 |
| Trp53i13      | 5.595  | 5.791  | 2.940  | 2.567  | 4.432  | 4.687  | 4.137  | 3.495  | 2.999  | 2.439  | 216964    | TP53I13    | NM_001024920_11_-1 |
| DDx49         | 5.878  | 5.739  | 5.233  | 5.239  | 5.101  | 4.940  | 4.958  | 5.065  | 4.914  | 4.674  | 234374    | DDX49      | NM_001024922_8_-1  |
| Cyb5d2        | 3.256  | 3.325  | 2.978  | 3.360  | 3.314  | 3.426  | 3.299  | 3.137  | 3.043  | 2.988  | 192986    | CYB5D2     | NM_001024926_11_-1 |
| Zfp667        | -0.655 | 0.216  | -0.508 | -0.582 | -0.387 | 0.788  | 0.491  | 1.251  | 0.386  | 1.748  | 384763    | ZNF667     | NM_001024928_7_+1  |
| Pilrb2        | 2.941  | -0.052 | 1.514  | 1.548  | 3.869  | 4.561  | 5.571  | 5.962  | 5.698  | 5.878  | 545812    | PILRB      | NM_001024932_5_-1  |
| Qsox1         | 0.995  | 1.789  | 1.134  | 0.207  | 0.234  | -0.725 | 0.656  | 0.403  | 2.506  | 1.951  | 104009    | QSOX1      | NM_001024945_1_-1  |
| Zfp563        | 2.455  | 2.437  | 1.769  | 1.755  | 1.780  | 2.201  | 1.688  | 1.502  | 1.647  | 2.284  | 240068    | ZNF563     | NM_001024950_17_+1 |
| Rc3h1         | 4.326  | 4.540  | 4.318  | 4.245  | 4.437  | 4.391  | 4.440  | 4.377  | 4.022  | 4.470  | 381305    | RC3H1      | NM_001024952_1_+1  |
| Pbx4          | 0.328  | 0.088  | -1.289 | -1.010 | -0.940 | 0.055  | -1.148 | 0.118  | -1.976 | -2.407 | 80720     | PBX4       | NM_001024954_8_+1  |
| Pik3r1        | -4.981 | -4.981 | -2.650 | -1.893 | -2.705 | -1.402 | -4.195 | -1.687 | -2.209 | -2.109 | 18708     | PIK3R1     | NM_001024955_13_-1 |
| Lrig2         | 4.043  | 3.657  | 3.670  | 3.130  | 3.651  | 3.394  | 3.666  | 3.704  | 4.307  | 4.126  | 269473    | LRIG2      | NM_001025067_3_-1  |
| Rhox7a        | -4.981 | -2.681 | -4.495 | -4.958 | -4.113 | -1.921 | -4.876 | -4.818 | -4.981 | -4.981 | 547168    | NA         | NM_001025086_X_+1  |
| Atf2          | 4.021  | 4.041  | 3.621  | 3.463  | 3.590  | 3.779  | 3.551  | 3.720  | 3.822  | 4.090  | 11909     | ATF2       | NM_001025093_2_-1  |
| Arl14ep       | 4.061  | 3.690  | 3.868  | 3.803  | 3.751  | 4.076  | 3.701  | 3.456  | 3.776  | 3.937  | 212772    | ARL14EP    | NM_001025102_2_-1  |
| Cracr2b       | -2.205 | -2.681 | 0.217  | -0.190 | -2.893 | -3.073 | -1.497 | -1.466 | 2.153  | 1.269  | 213573    | CRACR2B    | NM_001025103_7_+1  |
| Ccdc93        | 2.709  | 1.981  | 4.191  | 3.642  | 3.656  | 3.688  | 3.820  | 3.781  | 4.151  | 4.477  | 70829     | CCDC93     | NM_001025156_1_+1  |
| Zfp78         | 1.212  | 1.804  | -0.686 | -0.123 | 0.374  | 0.709  | -0.432 | -0.467 | 0.650  | 1.250  | 330463    | ZNF471     | NM_001025163_7_+1  |
| Cxadr         | -0.344 | -0.156 | -4.903 | -3.706 | -2.439 | -0.381 | -3.782 | -2.963 | -0.913 | -3.855 | 13052     | CXADR      | NM_001025192_16_+1 |
| Mbp           | 4.852  | 5.169  | 6.625  | 6.653  | 6.438  | 6.543  | 6.906  | 6.826  | 8.767  | 8.409  | 17196     | MBP        | NM_001025245_18_+1 |
| Trp53i11      | 6.466  | 6.849  | 2.406  | 2.127  | 3.250  | 3.133  | 2.429  | 3.912  | 0.010  | 0.223  | 277414    | TP53I11    | NM_001025246_2_+1  |
| Vegfa         | -4.981 | -4.542 | -4.528 | -4.870 | -4.741 | -4.192 | -2.252 | -4.215 | -4.704 | -4.454 | 22339     | VEGFA      | NM_001025250_17_-1 |
| Mbp           | -4.981 | -4.794 | -4.789 | -4.792 | -4.957 | -4.976 | -4.299 | -2.746 | -4.924 | -2.378 | 17196     | MBP        | NM_001025251_18_+1 |
| Mbp           | -4.981 | -4.761 | -4.909 | -3.947 | -4.841 | -4.973 | -2.181 | -4.938 | -4.929 | -4.727 | 17196     | MBP        | NM_001025254_18_+1 |
| Mbp           | -4.981 | -4.689 | -3.734 | -2.157 | -4.878 | -4.078 | -2.981 | -1.965 | -4.789 | -1.851 | 17196     | MBP        | NM_001025255_18_+1 |
| Mbp           | -4.981 | -4.563 | -4.683 | -3.671 | -3.122 | -2.325 | -2.589 | -1.420 | -0.701 | -0.003 | 17196     | MBP        | NM_001025256_18_+1 |
| Vegfa         | -4.981 | -2.030 | -4.932 | -2.235 | 1.610  | -0.834 | 2.715  | 0.336  | 1.251  | 1.319  | 22339     | VEGFA      | NM_001025257_17_-1 |
| Mbp           | -4.981 | -4.599 | -2.988 | -4.382 | -1.712 | -4.914 | -2.389 | -4.806 | -1.177 | -0.275 | 17196     | MBP        | NM_001025258_18_+1 |
| Mbp           | -4.981 | -4.056 | -0.666 | -3.417 | -1.902 | -1.773 | -2.120 | -3.760 | 1.443  | -0.200 | 17196     | MBP        | NM_001025259_18_+1 |
| Tpd52         | -1.559 | -0.565 | -4.734 | -4.908 | -2.695 | -4.863 | -1.407 | -4.938 | -1.386 | -1.982 | 21985     | TPD52      | NM_001025261_3_-1  |
| Tpd52         | -2.160 | 1.971  | 0.519  | 1.303  | 4.326  | 5.098  | 2.727  | 2.550  | 1.633  | 2.961  | 21985     | TPD52      | NM_001025262_3_-1  |
| Tpd52         | -0.092 | 1.279  | -0.027 | -1.364 | -0.867 | 0.195  | -2.675 | -0.991 | -2.105 | -0.169 | 21985     | TPD52      | NM_001025263_3_-1  |
| Tpd52         | 4.567  | 4.258  | 2.320  | 2.295  | 2.846  | 2.855  | 3.372  | 3.362  | 4.385  | 4.078  | 21985     | TPD52      | NM_001025264_3_-1  |
| Dffa          | 3.891  | 4.153  | 3.725  | 4.376  | 4.257  | 4.588  | 3.793  | 4.072  | 3.406  | 4.232  | 13347     | DFFA       | NM_001025296_4_+1  |
| Stx3          | 1.996  | -2.823 | 1.343  | -1.941 | 1.077  | -3.740 | 1.457  | -2.907 | 2.018  | -0.581 | 20908     | STX3       | NM_001025307_19_-1 |
| Pja2          | 4.151  | 4.315  | 4.518  | 4.576  | 3.497  | 3.448  | 3.738  | 3.883  | 4.824  | 4.855  | 224938    | PJA2       | NM_001025309_17_-1 |
| St6galnac6    | -2.140 | -1.415 | 1.386  | 1.270  | 2.329  | 1.462  | 1.403  | 1.611  | 3.650  | 3.645  | 50935     | ST6GALNAC6 | NM_001025310_2_+1  |
| St6galnac6    | -4.463 | -0.615 | 0.218  | 1.492  | 1.582  | 1.428  | 2.698  | 2.427  | 3.574  | 3.699  | 50935     | ST6GALNAC6 | NM_001025311_2_+1  |
| Dclre1b       | 1.353  | 0.783  | 0.331  | -0.617 | 0.068  | -0.450 | 0.320  | 0.273  | 1.997  | 1.322  | 140917    | DCLRE1B    | NM_001025312_3_-1  |
| Tapbp         | 8.364  | 8.354  | 8.456  | 8.551  | 7.960  | 8.087  | 7.996  | 8.185  | 8.730  | 8.412  | 21356     | TAPBP      | NM_001025313_17_+1 |
| Klc1          | -2.130 | 0.288  | -3.093 | -2.599 | -1.644 | -3.608 | -4.107 | -4.528 | 0.304  | -1.528 | 16593     | KLC1       | NM_001025358_12_+1 |
| Klc1          | 1.375  | -0.522 | 0.168  | -0.313 | -1.005 | 0.324  | -1.061 | -1.012 | 0.901  | 0.214  | 16593     | KLC1       | NM_001025359_12_+1 |
| Klc1          | 3.468  | 3.456  | 3.536  | 3.724  | 3.314  | 3.268  | 3.479  | 3.623  | 4.596  | 5.425  | 16593     | KLC1       | NM_001025360_12_+1 |
| Klc1          | 1.911  | 2.126  | 2.181  | 2.022  | 2.426  | 1.912  | 0.749  | 1.347  | 3.756  | 3.473  | 16593     | KLC1       | NM_001025361_12_+1 |
| Klc1          | -1.827 | -1.833 | 0.490  | -1.997 | -1.064 | -1.600 | -0.802 | -0.720 | 1.574  | 2.037  | 16593     | KLC1       | NM_001025362_12_+1 |
| Klc1          | -1.898 | 0.307  | 0.459  | -0.355 | -0.113 | -2.574 | -0.204 | -0.926 | -0.013 | 0.436  | 16593     | KLC1       | NM_001025363_12_+1 |
| Rtn2          | -4.981 | -4.981 | -4.943 | -1.832 | -4.656 | -4.405 | -3.762 | -4.311 | -4.981 | -4.981 | 20167     | RTN2       | NM_001025364_7_+1  |
| Miip          | 5.316  | 5.068  | 4.731  | 4.225  | 5.367  | 4.637  | 5.306  | 4.506  | 5.258  | 4.164  | 28010     | MIIP       | NM_001025365_4_-1  |
| Serinc4       | -2.836 | -2.758 | -2.647 | -4.097 | -3.357 | -3.034 | -3.358 | -3.627 | -1.219 | -2.696 | 574418    | SERINC4    | NM_001025371_2_-1  |
| Zfp943        | 4.852  | 5.026  | 4.226  | 3.977  | 4.438  | 4.421  | 4.667  | 4.321  | 4.197  | 4.952  | 74670     | NA         | NM_001025373_17_+1 |

|         |        |        |        |        |        |        |        |        |        |        |        |          |                        |
|---------|--------|--------|--------|--------|--------|--------|--------|--------|--------|--------|--------|----------|------------------------|
| Wdr61   | 4.532  | 4.609  | 4.212  | 4.164  | 4.008  | 3.992  | 4.085  | 3.735  | 3.266  | 3.456  | 66317  | WDR61    | NM_001025375_9_-1      |
| Wdr61   | 3.532  | 3.764  | 3.093  | 3.355  | 2.318  | 3.012  | 2.395  | 2.641  | 1.577  | 2.723  | 66317  | WDR61    | NM_001025376_9_-1      |
| Orc2    | 2.764  | -1.677 | -4.684 | -3.086 | -0.572 | -4.708 | -0.095 | -3.854 | -0.904 | -1.250 | 18393  | ORC2     | NM_001025378_1_-1      |
| Sema3g  | -4.981 | -4.981 | -3.096 | -3.757 | -4.965 | -4.844 | -4.981 | -4.981 | -4.981 | -4.981 | 218877 | SEMA3G   | NM_001025379_14_+1     |
| Fam196b | 2.050  | 1.956  | 2.081  | 2.282  | 2.781  | 2.537  | 2.627  | 1.495  | 2.925  | 2.325  | 574403 | FAM196B  | NM_001025382_11_+1     |
| Gm14685 | -0.011 | -0.398 | -4.981 | -4.981 | -4.769 | -4.923 | -4.981 | -4.981 | -4.981 | -4.476 | 574404 | NA       | NM_001025383_dup1_X_+1 |
| Gm14685 | -1.295 | -1.063 | -4.981 | -4.981 | -4.759 | -4.693 | -4.934 | -4.957 | -4.981 | -4.476 | 574404 | NA       | NM_001025383_X_-1      |
| DXBay18 | -3.718 | -3.590 | -4.981 | -4.981 | -4.926 | -4.976 | -4.981 | -4.981 | -4.981 | -4.827 | 574405 | NA       | NM_001025384_dup1_X_+1 |
| DXBay18 | -4.133 | -3.645 | -4.981 | -4.981 | -4.925 | -4.964 | -4.980 | -4.980 | -4.981 | -4.827 | 574405 | NA       | NM_001025384_X_-1      |
| Eno1b   | 1.121  | 6.273  | 1.432  | 6.786  | 2.281  | 7.920  | 2.736  | 8.281  | 3.835  | 9.070  | 433182 | ENO1     | NM_001025388_18_+1     |
| Eno1b   | 3.317  | -4.039 | 4.325  | -4.525 | 5.929  | -4.717 | 6.394  | -4.585 | 7.543  | -4.232 | 433182 | ENO1     | NM_001025388_4_+1      |
| Sufu    | 1.766  | 2.564  | 2.652  | 2.353  | 2.963  | 2.471  | 2.729  | 2.379  | 3.013  | 2.830  | 24069  | SUFU     | NM_001025391_19_+1     |
| Bclaf1  | 5.419  | 5.582  | 6.130  | 6.257  | 5.790  | 6.291  | 5.602  | 5.783  | 5.524  | 5.950  | 72567  | BCLAF1   | NM_001025392_10_+1     |
| Bclaf1  | 5.700  | 5.599  | 6.044  | 5.572  | 5.660  | 5.220  | 5.378  | 5.185  | 4.773  | 4.953  | 72567  | BCLAF1   | NM_001025393_10_+1     |
| Src     | 1.192  | 1.104  | 1.978  | 2.202  | -0.834 | -1.384 | -2.092 | -1.686 | -2.177 | -1.828 | 20779  | SRC      | NM_001025395_2_+1      |
| Depdc5  | -0.143 | 1.408  | 0.615  | 0.582  | 2.066  | 2.519  | 1.686  | 1.553  | 1.828  | 1.463  | 277854 | DEPDC5   | NM_001025426_5_+1      |
| Hmga1   | 2.070  | 0.655  | 1.027  | -1.084 | 0.742  | 1.110  | 1.008  | 1.068  | 2.339  | -0.015 | 15361  | HMGA1    | NM_001025427_17_+1     |
| Spag9   | -3.663 | -2.597 | -3.496 | -3.168 | -4.263 | -4.560 | -3.520 | -4.566 | -3.985 | -4.190 | 70834  | SPAG9    | NM_001025428_11_+1     |
| Spag9   | -3.644 | -2.579 | -3.386 | -2.986 | -2.267 | -2.151 | -3.252 | -4.527 | -3.971 | -4.142 | 70834  | SPAG9    | NM_001025429_11_+1     |
| Spag9   | 0.212  | 0.777  | 1.136  | 0.361  | 1.212  | 0.353  | 0.618  | -0.549 | 0.575  | 0.238  | 70834  | SPAG9    | NM_001025430_11_+1     |
| Btbd3   | 2.640  | -0.268 | 3.539  | 2.931  | 1.913  | 1.710  | 2.335  | 2.818  | 1.121  | 3.237  | 228662 | NA       | NM_001025431_2_+1      |
| Crebbp  | 5.098  | 5.402  | 5.344  | 5.272  | 5.770  | 5.606  | 5.650  | 5.465  | 5.598  | 5.630  | 12914  | CREBBP   | NM_001025432_16_-1     |
| Camk2d  | 2.745  | 3.333  | 4.461  | 4.421  | 4.550  | 4.702  | 4.428  | 5.030  | 6.694  | 6.825  | 108058 | CAMK2D   | NM_001025438_3_+1      |
| Camk2d  | -2.427 | -0.930 | -1.606 | -4.107 | -2.057 | -0.892 | -0.888 | -0.987 | 0.633  | 0.236  | 108058 | CAMK2D   | NM_001025439_3_+1      |
| Aptx    | 4.849  | 4.970  | 4.547  | 4.359  | 3.810  | 3.564  | 3.873  | 3.539  | 3.313  | 3.533  | 66408  | APTX     | NM_001025444_4_-1      |
| Aptx    | 3.597  | 3.834  | 1.942  | 2.122  | 2.519  | 3.038  | 1.530  | 2.353  | 2.522  | 1.916  | 66408  | APTX     | NM_001025445_4_-1      |
| Sox6    | -4.981 | -2.910 | -4.687 | -3.396 | -4.478 | -0.602 | -4.461 | -4.404 | -3.655 | -4.580 | 20679  | SOX6     | NM_001025559_7_-1      |
| Sox6    | -4.981 | -3.417 | -4.825 | -4.825 | -4.751 | -4.965 | -4.814 | -4.886 | -4.981 | -4.764 | 20679  | SOX6     | NM_001025560_7_-1      |
| Pus1    | -0.246 | 0.327  | -0.119 | -0.178 | -1.166 | -0.620 | -1.032 | -1.548 | -0.562 | -0.305 | 56361  | PUS1     | NM_001025561_5_-1      |
| Pus1    | 3.992  | 3.552  | 4.009  | 4.003  | 3.611  | 3.407  | 3.224  | 3.448  | 3.195  | 2.538  | 56361  | PUS1     | NM_001025562_5_-1      |
| Pde1c   | -4.085 | -4.173 | -4.796 | -4.973 | -4.882 | -4.978 | -4.742 | -4.959 | -4.981 | -4.981 | 18575  | PDE1C    | NM_001025568_6_-1      |
| Prrx1   | -4.981 | -4.981 | -4.938 | -4.938 | -4.995 | -4.822 | -4.968 | -4.734 | -4.981 | -4.981 | 18933  | PRRX1    | NM_001025570_1_-1      |
| Sh2d2a  | -1.671 | -3.070 | -4.026 | -0.491 | -1.220 | 0.547  | -0.395 | 1.935  | -1.932 | -2.911 | 27371  | SH2D2A   | NM_001025571_3_+1      |
| Ankrd12 | 6.722  | 6.785  | 7.000  | 6.738  | 6.066  | 5.945  | 5.858  | 5.678  | 4.631  | 4.664  | 106585 | ANKRD12  | NM_001025572_17_-1     |
| Slc23a4 | 0.935  | 0.507  | 0.525  | -0.912 | -1.363 | -4.202 | -2.183 | -1.897 | -4.981 | -4.981 | 243753 | NA       | NM_001025573_6_-1      |
| Cfhr2   | -4.981 | -4.981 | -4.799 | -4.822 | -4.981 | -4.981 | -4.944 | -4.682 | -4.006 | -2.571 | 545366 | NA       | NM_001025575_1_-1      |
| Ccdc141 | -4.981 | -4.981 | -5.015 | -3.073 | -3.696 | -3.705 | -4.714 | -4.343 | -2.614 | -2.392 | 545428 | CCDC141  | NM_001025576_2_-1      |
| Maf     | 1.191  | -0.384 | 0.708  | 1.248  | 0.609  | 0.138  | 1.440  | 3.099  | 2.418  | 3.786  | 17132  | MAF      | NM_001025577_8_-1      |
| Dram2   | 2.355  | 1.330  | 2.204  | 2.119  | 2.348  | 1.283  | 3.230  | 2.652  | 3.908  | 3.366  | 67171  | DRAM2    | NM_001025582_3_+1      |
| Nr2c2ap | 6.269  | 6.198  | 5.257  | 5.182  | 5.368  | 5.261  | 4.942  | 4.437  | 4.177  | 3.553  | 75692  | NR2C2AP  | NM_001025586_8_+1      |
| Nr2c2ap | 4.935  | 4.567  | 3.718  | 3.567  | 3.812  | 3.413  | 3.402  | 2.934  | 3.059  | 2.136  | 75692  | NR2C2AP  | NM_001025587_8_+1      |
| Rfxank  | 5.011  | 5.007  | 3.266  | 3.429  | 3.963  | 4.062  | 3.902  | 3.495  | 3.599  | 3.451  | 19727  | RFXANK   | NM_001025589_8_-1      |
| Zbtb43  | 2.368  | 2.937  | 2.951  | 2.803  | 3.002  | 2.790  | 3.402  | 3.237  | 3.859  | 4.155  | 71834  | ZBTB43   | NM_001025594_2_-1      |
| Ikzf1   | 5.487  | 5.714  | 5.259  | 5.157  | 6.367  | 6.330  | 5.804  | 5.490  | 5.432  | 5.703  | 22778  | IKZF1    | NM_001025597_11_+1     |
| Trim26  | 4.424  | 5.057  | 4.864  | 4.804  | 4.927  | 4.947  | 4.498  | 4.872  | 4.191  | 4.236  | 22670  | TRIM26   | NM_001025599_17_+1     |
| Cadm1   | 1.743  | 3.413  | 3.290  | 2.915  | -3.863 | -0.760 | -1.615 | 0.267  | -1.123 | -4.445 | 54725  | CADM1    | NM_001025600_9_+1      |
| Il1rl1  | -4.981 | -4.981 | -3.294 | -2.130 | -2.139 | -1.673 | 1.188  | 2.466  | -0.722 | -1.510 | 17082  | IL1RL1   | NM_001025602_1_+1      |
| Gm527   | 0.911  | 1.236  | 1.047  | 0.937  | 0.408  | 0.374  | 0.235  | -0.046 | 0.908  | 1.214  | 217648 | C14orf28 | NM_001025605_12_+1     |
| Tmem171 | -4.981 | -3.408 | -4.265 | -2.448 | -4.570 | -3.064 | -2.186 | -2.869 | -3.043 | -3.449 | 380863 | TMEM171  | NM_001025606_13_-1     |
| Szrd1   | 3.993  | 3.735  | 4.043  | 4.172  | 3.769  | 4.046  | 4.222  | 4.127  | 4.215  | 4.081  | 213491 | SZRD1    | NM_001025608_4_-1      |
| Ms4a7   | -1.718 | -4.981 | -1.279 | -2.368 | -2.242 | -1.473 | 0.792  | 1.958  | 0.007  | -0.128 | 109225 | MS4A7    | NM_001025610_19_-1     |
| Snx22   | 0.357  | 0.323  | 8.103  | 8.297  | 3.539  | 5.011  | 2.942  | 4.754  | 0.266  | 0.462  | 382083 | SNX22    | NM_001025612_9_-1      |
| Otud7b  | -3.979 | -0.560 | -1.772 | -0.479 | -1.351 | -3.482 | -2.062 | -0.580 | -2.703 | -4.454 | 229603 | OTUD7B   | NM_001025613_3_+1      |
| Otud7b  | 3.715  | 3.447  | 2.574  | 2.338  | 1.453  | 1.030  | -0.409 | 1.497  | 0.788  | 0.824  | 229603 | OTUD7B   | NM_001025614_3_+1      |
| Ccdc50  | 3.591  | 3.333  | 3.323  | 3.191  | 3.634  | 3.324  | 4.433  | 3.846  | 4.776  | 4.958  | 67501  | NA       | NM_001025615_16_+1     |
| Cant1   | 2.232  | 2.441  | -0.285 | 2.764  | 1.853  | 1.706  | 1.486  | 2.182  | 2.017  | 3.420  | 76025  | CANT1    | NM_001025617_11_-1     |
| Cant1   | 0.329  | 1.572  | 0.194  | 0.640  | 0.907  | 1.011  | 1.663  | 0.751  | -1.061 | 2.193  | 76025  | CANT1    | NM_001025618_11_-1     |
| Cdc6    | 0.702  | 0.396  | 2.933  | 3.600  | 3.797  | 3.369  | 2.515  | 3.513  | 1.750  | 1.455  | 23834  | CDC6     | NM_001025779_11_+1     |
| Dnm1l   | 4.283  | 4.526  | 5.356  | 5.556  | 5.194  | 4.957  | 5.049  | 4.694  | 3.508  | 4.423  | 74006  | DNM1L    | NM_001025947_16_-1     |
| Dnajc19 | 3.526  | 3.918  | 2.762  | 2.639  | 2.654  | 2.408  | 2.721  | 2.825  | 2.682  | 3.047  | 67713  | DNAJC19  | NM_001026211_3_-1      |
| Ensa    | 5.845  | 6.262  | 6.184  | 6.560  | 6.060  | 6.212  | 6.174  | 6.762  | 6.857  | 7.237  | 56205  | ENSA     | NM_001026212_3_+1      |
| Entpd5  | 0.922  | 1.942  | 2.930  | 3.399  | 2.489  | 2.221  | 1.981  | 3.177  | 2.646  | 3.038  | 12499  | ENTPD5   | NM_001026214_12_-1     |
| Npnt    | -4.981 | -4.981 | -4.874 | -4.942 | -4.971 | -4.970 | -4.975 | -4.969 | -4.981 | -4.981 | 114249 | NPNT     | NM_001029836_3_-1      |
| Pik3cd  | 6.254  | 5.763  | 5.724  | 5.351  | 7.287  | 6.918  | 6.705  | 6.089  | 6.956  | 6.194  | 18707  | PIK3CD   | NM_001029837_4_-1      |
| Slc16a6 | 6.478  | 6.372  | 7.111  | 7.273  | 7.822  | 8.078  | 7.831  | 7.750  | 8.126  | 8.268  | 20491  | SLC16A6  | NM_001029841_15_-1     |
| Slc16a6 | 0.000  | -0.625 | 1.345  | 0.793  | 0.265  | 1.864  | -0.922 | 1.554  | 1.448  | 0.939  | 104681 | SLC16A6  | NM_001029842_11_-1     |
| Vrk1    | 4.483  | 4.021  | 6.213  | 4.603  | 5.542  | 5.258  | 5.395  | 4.999  | 4.137  | 4.434  | 22367  | VRK1     | NM_001029843_12_+1     |
| Vrk1    | 6.093  | 6.108  | 6.740  | 6.558  | 7.383  | 6.896  | 7.337  | 7.051  | 6.829  | 6.523  | 22367  | VRK1     | NM_001029844_12_+1     |
| Mag1l   | -4.981 | -4.981 | -4.978 | -4.978 | -4.981 | -4.981 | -4.932 | -3.529 | -4.981 | -4.955 | 14924  | MAG1L    | NM_001029850_6_-1      |
| Psme2   | 7.715  | 7.539  | 7.857  | 8.156  | 7.313  | 7.268  | 7.244  | 6.916  | 5.247  | 5.766  | 19188  | PSME2    | NM_001029855_14_-1     |
| Atad5   | 1.901  | 2.054  | 3.133  | 3.311  | 4.615  | 3.984  | 3.660  | 3.312  | 2.220  | 2.084  | 237877 | ATAD5    | NM_001029856_11_+1     |
| Pdzd4   | 2.248  | 2.314  | -3.477 | -3.501 | -3.842 | -3.540 | -3.162 | -3.554 | -4.689 | -4.888 | 245469 | PDZD4    | NM_001029868_X_-1      |
| Itgad   | 4.574  | 5.715  | 2.666  | 4.206  | 3.847  | 4.971  | 3.528  | 5.117  | 1.651  | 2.218  | 381924 | ITGAD    | NM_001029872_7_+1      |
| Unc13a  | -0.040 | -1.306 | -1.440 | -2.582 | -1.786 | -1.941 | -0.332 | -2.307 | -2.569 | -3.758 | 382018 | UNC13A   | NM_001029873_8_-1      |

|                |        |        |        |        |        |        |        |        |        |        |               |          |                        |
|----------------|--------|--------|--------|--------|--------|--------|--------|--------|--------|--------|---------------|----------|------------------------|
| Urb2           | 1.389  | 1.792  | 2.026  | 2.508  | 2.297  | 1.872  | 2.254  | 2.105  | 2.664  | 2.878  | 382038        | URB2     | NM_001029876_8_+1      |
| Lonrf2         | -4.981 | -4.981 | -4.952 | -4.952 | -4.917 | -3.861 | -4.981 | -4.981 | -4.981 | -4.981 | 381338        | LONRF2   | NM_001029878_1_-1      |
| Usf3           | 3.722  | 3.836  | 4.494  | 4.328  | 4.013  | 3.965  | 4.271  | 4.213  | 4.707  | 4.610  | 207806        | USF3     | NM_001029889_16_+1     |
| Mex3a          | -2.205 | -2.060 | -1.034 | -1.808 | 0.125  | -0.974 | -0.819 | -3.140 | -4.981 | -4.981 | 72640         | MEX3A    | NM_001029890_3_+1      |
| Ate1           | 1.882  | 2.313  | 2.677  | 2.473  | 2.672  | 2.652  | 2.019  | 1.573  | 1.585  | 1.174  | 11907         | ATE1     | NM_001029895_7_-1      |
| Zswim5         | -4.981 | -4.981 | -4.970 | -3.817 | -3.625 | -4.199 | -4.924 | -4.354 | -4.981 | -4.981 | 74464         | ZSWIM5   | NM_001029912_4_+1      |
| Zmynd15        | 0.806  | -2.600 | 4.334  | 4.783  | 2.529  | 2.533  | 4.283  | 3.228  | -2.295 | -1.010 | 574428        | ZMYND15  | NM_001029929_11_+1     |
| Gm5796         | -1.107 | -2.424 | -2.363 | -4.319 | -4.924 | -1.853 | -4.908 | -4.130 | -4.981 | -4.316 | 545007        | NA       | NM_001029930_14_+1     |
| Zfp114         | -0.402 | -4.981 | -2.764 | -2.645 | -1.291 | -3.200 | -3.457 | -4.848 | -3.690 | -3.241 | 232966        | NA       | NM_001029933_7_+1      |
| Usp32          | 3.447  | 3.049  | 4.744  | 4.399  | 3.902  | 4.186  | 4.301  | 4.283  | 4.715  | 4.502  | 237898        | USP32    | NM_001029934_11_-1     |
| Trim38         | -4.981 | -4.981 | -3.516 | -3.370 | -4.925 | -4.222 | -4.965 | -3.942 | -4.981 | -4.981 | 214158        | TRIM38   | NM_001029935_13_+1     |
| Specc1         | -4.947 | -0.595 | -3.113 | -3.803 | -1.974 | -2.309 | -4.663 | -3.244 | -4.635 | -4.886 | 432572        | SPECC1   | NM_001029936_11_+1     |
| Rilp           | -1.389 | -4.981 | -0.870 | -0.677 | -2.436 | -3.693 | 0.629  | 0.889  | 2.323  | 2.321  | 280408        | RILP     | NM_001029938_11_+1     |
| Gm4788         | -4.981 | -4.981 | -4.980 | -4.980 | -4.981 | -4.981 | -4.981 | -4.980 | -4.879 | -4.815 | 214403        | NA       | NM_001029977_1_-1      |
| Tceal3         | -4.981 | -4.981 | -4.925 | -3.150 | -4.712 | -3.410 | -4.964 | -2.494 | -4.981 | -4.981 | 594844        | TCEAL6   | NM_001029978_X_+1      |
| Safb2          | 5.336  | 5.674  | 5.618  | 5.640  | 6.059  | 5.951  | 5.737  | 5.530  | 5.648  | 5.523  | 224902        | SAFB2    | NM_001029979_17_-1     |
| Sec23ip        | 4.585  | 4.498  | 5.569  | 5.200  | 4.796  | 4.781  | 4.899  | 5.044  | 5.664  | 5.729  | 207352        | SEC23IP  | NM_001029982_7_+1      |
| Man1b1         | 4.728  | 4.230  | 5.402  | 4.898  | 4.291  | 3.776  | 3.937  | 3.725  | 3.818  | 3.439  | 227619        | MAN1B1   | NM_001029983_2_+1      |
| Fcrlb          | -4.981 | -3.315 | 2.846  | -4.473 | -1.565 | -4.559 | -0.596 | -1.960 | -1.543 | -4.981 | 435653        | FCRLB    | NM_001029984_1_-1      |
| Kcp            | -4.981 | -4.981 | -0.093 | 0.765  | -2.517 | -2.221 | -2.401 | -3.104 | -4.981 | -4.981 | 333088        | KCP      | NM_001029985_6_-1      |
| Fat2           | -4.981 | -4.981 | -4.981 | -4.981 | -1.187 | -1.776 | -0.096 | -1.428 | -4.981 | -4.981 | 245827        | FAT2     | NM_001029988_11_-1     |
| Mettl17        | 4.658  | 4.745  | 4.431  | 4.674  | 4.513  | 4.870  | 4.158  | 4.540  | 3.940  | 4.051  | 52535         | METTL17  | NM_001029990_14_+1     |
| Zc3h18         | 2.705  | 2.605  | 3.053  | 3.480  | 3.392  | 3.086  | 2.738  | 3.413  | 4.136  | 4.033  | 76014         | ZC3H18   | NM_001029993_8_+1      |
| Zc3h18         | 3.342  | 3.079  | 3.525  | 3.316  | 3.666  | 3.834  | 3.830  | 3.426  | 4.191  | 4.148  | 76014         | ZC3H18   | NM_001029994_8_+1      |
| Mcat           | 5.041  | 4.783  | 4.402  | 4.515  | 4.378  | 4.508  | 4.207  | 4.211  | 3.761  | 3.463  | 223722        | MCAT     | NM_001030014_15_-1     |
| Ndufs5         | 6.650  | 1.624  | 5.399  | 0.821  | 5.252  | 0.473  | 5.621  | 0.101  | 4.382  | 0.055  | 595136        | NA       | NM_001030274_4_-1      |
| Record_removed | -4.981 | -4.981 | -4.780 | -4.488 | -3.318 | -3.905 | -4.148 | -2.842 | -3.491 | -4.981 | Record_remove | NA       | NM_001030289_9_+1      |
| Olfm4          | -4.981 | -4.981 | -4.985 | -4.810 | -4.974 | -1.497 | -4.851 | -3.895 | 0.256  | -4.981 | 380924        | OLFM4    | NM_001030294_14_+1     |
| Prr7           | -3.099 | -3.315 | -2.194 | -3.429 | -3.419 | -3.430 | -2.463 | -3.465 | -3.925 | -3.011 | 432763        | PRR7     | NM_001030296_13_+1     |
| Dkc1           | 5.954  | 6.066  | 5.816  | 6.083  | 5.386  | 5.603  | 5.212  | 5.843  | 3.847  | 4.193  | 245474        | DKC1     | NM_001030307_X_+1      |
| Abca17         | 1.176  | -4.981 | 1.751  | 0.233  | 0.158  | -4.582 | -2.058 | -4.408 | -2.284 | -4.981 | 381072        | NA       | NM_001031621_17_-1     |
| Gsk3a          | 3.775  | 3.668  | 4.649  | 4.576  | 5.066  | 4.974  | 4.829  | 4.831  | 5.825  | 5.643  | 606496        | GSK3A    | NM_001031667_7_-1      |
| Mrpl41         | 6.265  | 6.150  | 5.605  | 5.525  | 5.383  | 5.523  | 5.375  | 5.309  | 4.254  | 3.997  | 107733        | MRPL41   | NM_001031808_2_-1      |
| Smg1           | 5.203  | 5.153  | 5.652  | 5.572  | 6.197  | 6.121  | 5.721  | 5.518  | 5.180  | 5.438  | 233789        | SMG1     | NM_001031814_7_-1      |
| Bglap2         | -0.774 | -1.409 | -4.863 | -4.975 | -4.978 | -4.978 | -4.981 | -4.981 | -4.981 | -4.981 | 12097         | BGLAP    | NM_001032298_3_-1      |
| Pecam1         | 3.524  | 3.147  | 3.327  | 3.103  | 4.243  | 3.968  | 3.208  | 3.443  | 2.006  | 1.720  | 18613         | PECAM1   | NM_001032378_11_-1     |
| Pear1          | -3.980 | -3.554 | -4.617 | -4.233 | -4.269 | -4.858 | -4.041 | -4.534 | -4.821 | -4.751 | 73182         | PEAR1    | NM_001032413_3_-1      |
| Pear1          | -3.063 | -2.666 | -4.183 | -2.939 | -4.973 | -4.248 | -3.413 | -1.352 | -4.639 | -4.530 | 73182         | PEAR1    | NM_001032414_3_-1      |
| Klhdc9         | 3.325  | 3.460  | 2.171  | 2.037  | 2.660  | 3.381  | 1.976  | 2.111  | 2.221  | 1.350  | 68874         | KLHDC9   | NM_001033039_1_-1      |
| Ccdc189        | 0.903  | 1.517  | 1.231  | 1.603  | 1.244  | 1.772  | 0.754  | 0.942  | 0.477  | 0.887  | 233899        | CCDC189  | NM_001033040_7_-1      |
| Acmsd          | -3.843 | -3.267 | -2.867 | -2.179 | -4.246 | -1.809 | -2.812 | -1.791 | -4.981 | -2.152 | 266645        | ACMSD    | NM_001033041_1_+1      |
| Lrrc14b        | -0.921 | -3.165 | -0.982 | -2.081 | -1.944 | -3.394 | -2.713 | -1.351 | -0.310 | -0.582 | 432779        | LRRC14B  | NM_001033042_13_-1     |
| Rnf17          | 0.105  | -4.981 | -1.420 | -4.049 | -1.585 | -3.156 | -0.844 | -3.317 | -1.585 | -1.865 | 30054         | RNF17    | NM_001033043_14_+1     |
| Cd69           | 8.730  | 8.934  | 3.346  | 4.396  | 5.155  | 5.175  | 5.703  | 6.377  | 3.276  | 3.841  | 12515         | CD69     | NM_001033122_6_-1      |
| Gm14288        | -3.307 | 0.360  | -2.105 | -0.651 | 0.199  | -0.422 | -0.771 | -2.578 | -1.257 | -1.197 | 13999         | NA       | NM_001033123_2_+1      |
| Gm14288        | 3.335  | 0.592  | 1.891  | 0.046  | 0.860  | -0.360 | 0.718  | -1.401 | -0.205 | -3.300 | 13999         | NA       | NM_001033123_dup1_2_-1 |
| Gm14288        | 3.179  | 0.592  | 1.194  | 0.117  | 1.115  | -0.994 | 0.779  | -1.329 | -0.205 | -4.375 | 13999         | NA       | NM_001033123_dup2_2_+2 |
| Ntrk1          | -0.476 | -0.568 | -4.957 | -4.957 | -4.981 | -4.981 | -4.969 | -4.954 | -4.981 | -2.969 | 18211         | NTRK1    | NM_001033124_3_-1      |
| Cd27           | 1.349  | -0.017 | -0.556 | -0.376 | -1.084 | 1.452  | -0.460 | 2.774  | -1.109 | -1.863 | 21940         | CD27     | NM_001033126_6_-1      |
| Bbs1           | 0.514  | -0.099 | -1.523 | -3.383 | -1.957 | -1.769 | -2.697 | -0.689 | -2.934 | -4.165 | 52028         | BBS1     | NM_001033128_19_-1     |
| Commd6         | 7.338  | 7.503  | 6.052  | 5.981  | 5.777  | 5.855  | 5.769  | 5.737  | 5.166  | 5.172  | 66200         | NA       | NM_001033132_14_-1     |
| Rnf149         | 5.881  | 5.824  | 5.825  | 5.511  | 7.740  | 7.741  | 7.835  | 7.498  | 8.272  | 8.267  | 67702         | RNF149   | NM_001033135_1_-1      |
| Rmdn3          | 5.235  | 5.307  | 4.495  | 4.831  | 4.361  | 4.658  | 4.145  | 4.515  | 4.137  | 4.364  | 67809         | RMDN3    | NM_001033136_2_-1      |
| Al846148       | 2.735  | 2.536  | 2.951  | 3.118  | 3.196  | 3.236  | 2.942  | 2.717  | 3.415  | 3.440  | 68229         | C11orf84 | NM_001033139_19_-1     |
| Sdhaf1         | 6.004  | 5.691  | 5.815  | 5.721  | 6.722  | 6.214  | 6.757  | 5.740  | 4.428  | 4.315  | 68332         | SDHAF1   | NM_001033140_7_-1      |
| Ecsr           | -1.174 | -4.981 | -4.951 | -4.002 | -4.455 | -4.343 | -4.727 | -4.037 | -4.981 | -4.981 | 68545         | ECSCR    | NM_001033141_18_-1     |
| Rnf166         | 6.728  | 6.564  | 6.351  | 6.202  | 6.986  | 7.122  | 7.232  | 7.259  | 7.738  | 7.593  | 68718         | RNF166   | NM_001033142_8_-1      |
| 1190002N15Rik  | 5.087  | 5.697  | 4.662  | 4.567  | 3.567  | 3.745  | 3.940  | 4.150  | 4.056  | 4.394  | 68861         | C3orf58  | NM_001033145_9_-1      |
| 1700029J07Rik  | 1.585  | 2.037  | -1.431 | -0.936 | 0.183  | 1.000  | -2.299 | -0.471 | -2.180 | -2.384 | 69479         | C4orf47  | NM_001033148_8_-1      |
| Ttc9           | -4.981 | -0.777 | -4.440 | -4.989 | -1.727 | -2.075 | -2.642 | -3.096 | -4.981 | -4.981 | 69480         | TTC9     | NM_001033149_12_+1     |
| Plekhn2        | 3.155  | 3.282  | 4.213  | 3.951  | 4.114  | 3.991  | 4.258  | 3.933  | 4.039  | 3.690  | 69582         | PLEKHM2  | NM_001033150_4_-1      |
| Dnajb14        | 5.401  | 5.543  | 5.401  | 5.412  | 4.675  | 4.854  | 4.995  | 4.974  | 5.352  | 5.367  | 70604         | DNAJB14  | NM_001033155_3_+1      |
| Fbxo33         | 4.931  | 4.399  | 4.525  | 4.305  | 4.815  | 4.658  | 4.612  | 4.480  | 4.955  | 5.116  | 70611         | FBXO33   | NM_001033156_12_-1     |
| 5730507C01Rik  | -2.121 | -1.294 | -1.337 | -2.672 | -1.747 | -3.228 | -1.752 | -4.028 | -1.434 | -2.264 | 236366        | NA       | NM_001033157_12_+1     |
| Rasl12         | -2.483 | -4.981 | -3.321 | -3.371 | 2.317  | 1.999  | -0.767 | -1.894 | -2.989 | -4.981 | 70784         | RASL12   | NM_001033158_9_+1      |
| Zfp597         | 2.959  | 2.279  | 3.854  | 3.759  | 4.148  | 3.994  | 3.541  | 3.261  | 3.771  | 4.146  | 71063         | ZNF597   | NM_001033159_16_-1     |
| Tradd          | 5.484  | 5.546  | 4.797  | 4.825  | 4.616  | 4.635  | 4.674  | 4.746  | 4.835  | 4.702  | 71609         | TRADD    | NM_001033161_8_-1      |
| Shcbp1l        | -1.681 | -0.387 | -0.252 | -2.419 | -0.365 | -0.145 | -0.040 | -1.884 | -1.250 | -0.777 | 71836         | SHCBP1L  | NM_001033162_1_+1      |
| Ephx3          | -2.842 | -1.773 | -4.053 | -3.231 | -4.727 | -4.763 | -4.510 | -4.950 | -4.981 | -2.208 | 71932         | EPHX3    | NM_001033163_17_-1     |
| 2510002D24Rik  | 5.592  | 5.688  | 4.507  | 4.683  | 5.139  | 5.365  | 4.601  | 4.789  | 2.556  | 2.649  | 72307         | NA       | NM_001033164_16_+1     |
| Dnajc25        | 4.245  | 3.757  | 3.445  | 3.287  | 4.224  | 3.992  | 3.941  | 3.503  | 3.159  | 3.440  | 72429         | DNAJC25  | NM_001033165_4_+1      |
| 2700094K13Rik  | 5.778  | 5.568  | 5.909  | 5.751  | 5.961  | 5.896  | 5.989  | 5.407  | 4.002  | 3.918  | 72657         | SELENOH  | NM_001033166_2_-1      |
| Slc22a23       | 3.039  | 3.277  | 4.245  | 4.199  | 1.712  | 2.163  | 0.953  | 1.862  | -0.064 | 0.248  | 73102         | SLC22A23 | NM_001033167_13_-1     |
| 1700066B19Rik  | 0.563  | -2.997 | -0.230 | -1.707 | -0.168 | -1.240 | -1.065 | -2.162 | -1.734 | -2.094 | 73449         | NA       | NM_001033168_18_+1     |

|               |        |        |        |        |        |        |        |        |        |        |        |           |                     |
|---------------|--------|--------|--------|--------|--------|--------|--------|--------|--------|--------|--------|-----------|---------------------|
| Fam83e        | -2.573 | -4.981 | -4.986 | -4.205 | -3.612 | -3.625 | -2.430 | -4.442 | -4.981 | -3.480 | 73813  | FAM83E    | NM_001033170_7_+_1  |
| Klrg2         | -4.981 | -4.981 | 1.614  | 1.575  | -4.703 | -4.509 | -2.428 | -0.130 | -2.523 | 0.194  | 74253  | KLRG2     | NM_001033171_6_-_1  |
| Rab11fip2     | 4.100  | 3.662  | 3.465  | 2.586  | 3.486  | 3.051  | 3.101  | 2.038  | 2.023  | 1.389  | 74998  | RAB11FIP2 | NM_001033172_19_-_1 |
| Usp31         | 2.009  | 1.581  | 3.224  | 2.499  | 2.270  | 2.086  | 2.632  | 2.509  | 2.904  | 3.051  | 76179  | USP31     | NM_001033173_7_-_1  |
| Osbp          | 4.523  | 4.507  | 5.008  | 5.074  | 4.968  | 4.864  | 5.227  | 5.348  | 6.368  | 6.487  | 76303  | OSBP      | NM_001033174_19_+_1 |
| Cln6          | 3.946  | 4.254  | 3.656  | 3.885  | 2.542  | 3.009  | 3.862  | 4.333  | 5.123  | 5.109  | 76524  | CLN6      | NM_001033175_9_+_1  |
| Slc6a21       | -1.262 | -1.460 | -4.981 | -4.981 | -4.973 | -4.973 | -4.819 | -4.981 | -4.190 | -4.981 | 76713  | NA        | NM_001033176_7_+_1  |
| Tmem181a      | 4.795  | 4.894  | 4.622  | 4.698  | 4.062  | 4.162  | 3.865  | 4.023  | 4.574  | 4.324  | 77106  | TMEM181   | NM_001033178_17_+_1 |
| Jrkl          | 2.413  | 2.380  | 3.443  | 3.215  | 2.982  | 3.094  | 3.041  | 3.003  | 3.473  | 3.849  | 77532  | JRKL      | NM_001033181_9_-_1  |
| Skap1         | -1.947 | -4.409 | -4.284 | -1.460 | -2.433 | -0.197 | -0.625 | 1.579  | -2.453 | -4.883 | 78473  | SKAP1     | NM_001033186_11_+_1 |
| C77080        | -4.183 | -4.108 | -4.701 | -4.946 | -4.714 | -4.937 | -4.742 | -4.935 | -4.500 | -4.817 | 97130  | KIAA1522  | NM_001033189_4_-_1  |
| Fam8a1        | 0.705  | 1.911  | 0.448  | 0.821  | 0.508  | 0.696  | -0.025 | 0.700  | 0.953  | 1.918  | 97863  | FAM8A1    | NM_001033192_13_+_1 |
| Gtf3c3        | 3.132  | 2.993  | 3.475  | 3.651  | 3.600  | 3.580  | 3.395  | 3.575  | 3.900  | 4.205  | 98488  | GTF3C3    | NM_001033194_1_-_1  |
| Znfx1         | 2.607  | 2.241  | 5.276  | 5.083  | 4.732  | 4.345  | 4.819  | 4.316  | 6.398  | 5.802  | 98999  | ZNFX1     | NM_001033196_2_-_1  |
| Ncbp1         | 5.536  | 5.354  | 5.461  | 5.341  | 5.697  | 5.715  | 5.430  | 5.468  | 5.296  | 5.352  | 433702 | NCBP1     | NM_001033201_4_+_1  |
| Usp30         | 2.890  | 3.073  | 2.671  | 2.651  | 2.176  | 2.392  | 2.323  | 1.968  | 2.996  | 2.865  | 100756 | USP30     | NM_001033202_5_+_1  |
| Rpusd3        | 2.582  | 2.708  | 1.072  | 1.597  | 2.281  | 2.057  | 1.504  | 1.686  | 0.791  | 1.011  | 101122 | RPUSD3    | NM_001033204_6_-_1  |
| Zfp575        | -0.721 | 1.186  | -2.082 | -1.868 | -2.593 | -2.626 | -2.676 | -2.528 | -1.780 | -1.824 | 101544 | ZNF575    | NM_001033205_7_-_1  |
| Pwvwp2b       | 0.442  | -1.689 | 1.015  | 0.595  | -3.398 | -4.042 | 0.663  | -0.337 | 2.569  | 2.358  | 101631 | PWWP2B    | NM_001033206_7_+_1  |
| Nlrc5         | 5.240  | 4.288  | 6.575  | 6.610  | 5.395  | 4.811  | 5.650  | 4.907  | 5.251  | 4.483  | 434341 | NLRC5     | NM_001033207_8_+_1  |
| Myzap         | 5.603  | 5.569  | 2.193  | 3.196  | -0.030 | 1.229  | -0.780 | 1.020  | -4.981 | -3.758 | 102371 | MYZAP     | NM_001033208_9_-_1  |
| Xylb          | -1.248 | -1.176 | -0.373 | 0.210  | -0.993 | -0.782 | 0.320  | 0.689  | 0.970  | 1.815  | 102448 | XYLB      | NM_001033209_9_+_1  |
| Pls1          | 2.141  | 2.244  | -1.288 | -0.785 | -3.459 | -3.114 | -1.553 | 0.517  | -0.398 | -0.641 | 102502 | PLS1      | NM_001033210_9_-_1  |
| Rprml         | -4.981 | -4.981 | -4.948 | -4.948 | -4.935 | -3.954 | -4.944 | -3.301 | -3.322 | -4.981 | 104582 | RPRML     | NM_001033212_11_+_1 |
| Ttc7b         | 3.417  | 3.389  | 5.093  | 5.262  | 3.621  | 3.878  | 4.052  | 4.053  | 4.457  | 4.421  | 104718 | TTC7B     | NM_001033213_12_-_1 |
| Prickle1      | -0.903 | 0.133  | -1.129 | -2.822 | -1.394 | -3.794 | -2.752 | -1.124 | -0.777 | -2.447 | 106042 | PRICKLE1  | NM_001033217_15_-_1 |
| Slc45a4       | 2.680  | 3.442  | 3.131  | 3.342  | 4.494  | 4.927  | 4.197  | 4.597  | 3.891  | 4.543  | 106068 | SLC45A4   | NM_001033219_15_-_1 |
| AU021092      | -0.414 | -4.981 | -4.977 | -4.977 | -4.801 | -4.726 | -4.834 | -2.994 | -2.356 | -2.750 | 239691 | C16orf89  | NM_001033220_16_-_1 |
| G6b           | -3.668 | -2.583 | -4.176 | -2.789 | -4.330 | -3.725 | -1.970 | -4.989 | -1.908 | -2.694 | 106722 | C6orf25   | NM_001033221_17_-_1 |
| Pdzd8         | 5.716  | 4.683  | 4.819  | 4.527  | 5.133  | 5.065  | 4.967  | 4.717  | 5.206  | 5.072  | 107368 | PDZD8     | NM_001033222_19_-_1 |
| Lin7a         | -4.981 | -4.981 | -4.855 | -4.881 | -4.976 | -4.966 | -4.645 | -4.831 | -3.563 | -4.981 | 108030 | LIN7A     | NM_001033223_10_+_1 |
| Pnrc1         | 8.699  | 8.800  | 7.787  | 7.763  | 8.215  | 8.367  | 8.301  | 8.178  | 7.443  | 7.533  | 108767 | PNRC1     | NM_001033225_4_-_1  |
| Calr4         | -3.428 | -2.633 | -4.602 | -4.986 | -4.515 | -4.958 | -4.900 | -4.981 | -4.776 | -4.672 | 108802 | NA        | NM_001033226_4_+_1  |
| Itga1         | -4.981 | -1.668 | 3.792  | 3.443  | -4.529 | -3.955 | -0.389 | 1.795  | 4.750  | 4.851  | 109700 | ITGA1     | NM_001033228_13_-_1 |
| Fam195b       | 7.452  | 7.291  | 6.854  | 6.744  | 6.844  | 6.818  | 6.906  | 6.809  | 6.960  | 6.661  | 192173 | MCRIP1    | NM_001033231_11_-_1 |
| Vcpkmt        | 0.079  | 0.679  | 0.345  | 1.278  | 0.105  | 0.048  | 0.154  | -0.012 | -0.611 | 0.720  | 207965 | VCPKMT    | NM_001033236_12_-_1 |
| Yeats2        | 1.898  | 1.082  | 0.834  | 0.764  | 1.545  | 1.075  | 0.870  | 1.572  | 0.511  | 1.588  | 208146 | YEATS2    | NM_001033237_16_+_1 |
| Cblb          | 4.396  | 4.416  | 5.568  | 5.379  | 4.928  | 4.784  | 4.918  | 5.151  | 5.618  | 5.741  | 208650 | CBLB      | NM_001033238_16_+_1 |
| Cln5          | 6.263  | 6.508  | 5.543  | 5.531  | 4.928  | 5.031  | 5.460  | 5.442  | 5.974  | 6.285  | 211286 | CLN5      | NM_001033242_14_+_1 |
| Ccdc114       | -0.387 | -0.907 | -1.365 | -1.078 | -2.379 | -3.846 | -1.651 | -1.270 | -0.098 | 0.395  | 211535 | CCDC114   | NM_001033243_7_+_1  |
| Fancd2        | 2.213  | 1.891  | 1.664  | 1.128  | 2.145  | 1.159  | 1.056  | 0.036  | 1.101  | -0.039 | 211651 | FANCD2    | NM_001033244_6_+_1  |
| Hk3           | -4.448 | -4.336 | 5.010  | 5.072  | -0.482 | 0.411  | 2.788  | 2.452  | 5.676  | 5.537  | 212032 | HK3       | NM_001033245_13_-_1 |
| Cfap44        | -4.981 | -4.981 | -4.952 | -4.952 | -4.546 | -4.835 | -4.958 | -3.819 | -4.190 | 1.463  | 212517 | CFAP44    | NM_001033247_16_+_1 |
| Gm266         | -2.739 | -4.981 | -4.837 | -4.309 | -4.947 | -4.130 | -3.872 | -4.978 | -4.981 | -4.981 | 212539 | NA        | NM_001033248_12_-_1 |
| Zfp583        | 1.533  | 2.282  | -0.311 | 0.983  | 0.858  | 1.500  | 0.344  | -0.005 | -0.692 | 1.017  | 213011 | ZNF583    | NM_001033249_7_-_1  |
| Gpr174        | 0.766  | 1.731  | -4.755 | -1.448 | -4.904 | -4.814 | -2.526 | 0.079  | -4.981 | -4.981 | 213439 | GPR174    | NM_001033251_X_+_1  |
| Plekhg1       | -4.981 | -2.968 | -4.854 | -2.400 | -4.473 | -3.726 | -0.962 | -0.470 | -0.109 | 0.036  | 213783 | PLEKHG1   | NM_001033253_10_+_1 |
| Pak6          | -0.098 | 1.063  | -4.002 | -4.936 | -4.917 | -4.594 | -4.906 | -4.688 | -4.981 | -4.981 | 214230 | PAK6      | NM_001033254_2_+_1  |
| Spata5l1      | 1.046  | -0.612 | 1.750  | 0.526  | 1.590  | 1.052  | 1.712  | -0.160 | 1.993  | 0.354  | 214616 | SPATA5L1  | NM_001033256_2_+_1  |
| Phactr2       | 5.086  | 5.243  | 4.557  | 4.569  | 3.999  | 3.675  | 4.316  | 4.202  | 4.774  | 4.352  | 215789 | PHACTR2   | NM_001033257_10_-_1 |
| Arfgef3       | -4.981 | -4.981 | -1.702 | -0.918 | -0.585 | -2.304 | -1.414 | -2.123 | -3.196 | -2.647 | 215821 | ARFGEF3   | NM_001033258_10_-_1 |
| Mcu           | 1.272  | 2.391  | 2.464  | 2.766  | 2.618  | 2.952  | 2.834  | 2.736  | 3.201  | 3.226  | 215999 | MCU       | NM_001033259_10_-_1 |
| Stox1         | 0.929  | 0.716  | 1.140  | 0.959  | 0.077  | -0.330 | -0.835 | -2.192 | -4.981 | -4.981 | 216021 | STOX1     | NM_001033260_10_-_1 |
| Zfc3h1        | 5.068  | 5.030  | 6.243  | 6.177  | 6.574  | 6.182  | 5.795  | 5.638  | 5.461  | 5.492  | 216345 | ZFC3H1    | NM_001033261_10_+_1 |
| March9        | 0.246  | 0.475  | -2.243 | -1.896 | -1.604 | -3.439 | -3.110 | -3.138 | -4.981 | -4.981 | 216438 | MARCH9    | NM_001033262_10_-_1 |
| Agap2         | -1.396 | -2.528 | -2.536 | -2.591 | -2.657 | -3.339 | -2.560 | -2.914 | -3.746 | -3.695 | 216439 | AGAP2     | NM_001033263_10_+_1 |
| Gls2          | -4.981 | -4.144 | -4.434 | -3.023 | -4.704 | -4.691 | -4.380 | -3.417 | -4.598 | -4.981 | 216456 | GLS2      | NM_001033264_10_+_1 |
| Gm525         | 0.233  | -0.978 | -4.028 | -4.250 | -4.954 | -4.896 | -4.972 | -4.600 | -4.981 | -4.981 | 217071 | C17orf67  | NM_001033266_11_+_1 |
| Qrich2        | -3.668 | -4.981 | -1.368 | -2.457 | -3.500 | -4.600 | -1.933 | -4.965 | -2.267 | -4.981 | 217341 | QRICH2    | NM_001033267_11_-_1 |
| Fam120a       | 5.852  | 5.855  | 6.407  | 6.429  | 6.166  | 6.203  | 6.371  | 6.385  | 7.069  | 7.253  | 218236 | FAM120A   | NM_001033268_13_-_1 |
| Slc4a7        | 4.825  | 4.454  | 6.334  | 5.681  | 4.468  | 4.509  | 5.127  | 4.964  | 5.248  | 5.387  | 218756 | SLC4A7    | NM_001033270_14_+_1 |
| Tmem55b       | 7.257  | 7.278  | 7.021  | 6.983  | 7.354  | 7.473  | 7.155  | 7.173  | 7.579  | 7.148  | 219024 | TMEM55B   | NM_001033271_14_-_1 |
| Spata13       | 4.503  | 4.811  | 4.546  | 4.500  | 4.861  | 4.923  | 6.030  | 5.758  | 6.170  | 5.782  | 219140 | SPATA13   | NM_001033272_14_+_1 |
| 5031439G07Rik | 6.177  | 6.614  | 7.198  | 7.204  | 7.873  | 8.053  | 7.433  | 7.365  | 8.166  | 7.865  | 223739 | KIAA0930  | NM_001033273_15_-_1 |
|               | 5.898  | 5.551  | 5.360  | 5.296  | 5.666  | 5.704  | 5.762  | 5.620  | 6.106  | 6.239  | 223770 | BRD1      | NM_001033274_15_-_1 |
|               | 4.443  | 4.319  | 5.362  | 5.334  | 5.639  | 5.833  | 5.545  | 5.336  | 5.516  | 5.642  | 223827 | GXYLT1    | NM_001033275_15_-_1 |
|               | 5.069  | 5.005  | 5.519  | 5.518  | 6.457  | 6.349  | 5.668  | 5.603  | 5.976  | 6.061  | 381022 | KMT2D     | NM_001033276_15_-_1 |
| Spryd3        | 4.008  | 3.820  | 4.355  | 4.491  | 4.658  | 4.480  | 4.329  | 4.399  | 5.398  | 5.203  | 223918 | SPRYD3    | NM_001033277_15_-_1 |
| D17Wsu92e     | 4.370  | 4.101  | 5.020  | 4.927  | 4.303  | 4.182  | 4.884  | 4.840  | 6.284  | 5.826  | 224647 | C6orf106  | NM_001033279_17_-_1 |
| BC026585      | 3.587  | 3.870  | 3.142  | 3.919  | 3.034  | 2.628  | 3.054  | 3.373  | 2.012  | 3.173  | 226527 | NA        | NM_001033284_1_+_1  |
| Cdc42bpa      | -0.095 | -0.307 | -3.526 | 0.156  | -0.683 | 0.459  | -3.011 | -0.421 | -3.288 | -0.481 | 226751 | CD42BPB   | NM_001033285_1_+_1  |
| Slc30a10      | -4.981 | -4.981 | -4.961 | -3.837 | -4.986 | -1.929 | -4.941 | -2.284 | -4.981 | -1.368 | 226781 | SLC30A10  | NM_001033286_1_+_1  |
| Sbspon        | 1.102  | 2.598  | -4.695 | -3.862 | -4.905 | -4.900 | -4.974 | -4.128 | -4.981 | -4.316 | 226866 | SBSPON    | NM_001033288_1_-_1  |
| Slc9a2        | 0.451  | -0.473 | -0.121 | -1.583 | 1.363  | 2.294  | -0.151 | -0.858 | -0.293 | -1.914 | 226999 | SLC9A2    | NM_001033289_1_+_1  |

|               |        |        |        |        |        |        |        |        |        |        |               |          |                    |
|---------------|--------|--------|--------|--------|--------|--------|--------|--------|--------|--------|---------------|----------|--------------------|
| Gpr55         | -0.012 | -0.021 | -0.935 | -0.834 | 0.061  | -0.063 | -2.055 | -2.131 | -2.012 | -1.419 | 227326        | GPR55    | NM_001033290_1_-1  |
| Usp40         | 1.995  | 1.095  | 0.243  | -0.645 | 0.950  | -0.142 | 0.781  | -1.283 | -1.344 | 1.653  | 227334        | USP40    | NM_001033291_1_-1  |
| Uap111        | 6.057  | 5.026  | 6.384  | 5.611  | 5.294  | 3.830  | 5.735  | 4.335  | 5.089  | 2.786  | 227620        | UAP111   | NM_001033293_2_-1  |
| Ddx31         | 3.469  | 3.352  | 3.178  | 3.481  | 3.304  | 3.386  | 3.281  | 3.390  | 3.553  | 3.745  | 227674        | DDX31    | NM_001033294_2_+1  |
| Gm561         | 4.383  | 4.376  | 3.331  | 3.332  | 3.209  | 3.428  | 3.643  | 3.336  | 2.685  | 2.305  | 228715        | NA       | NM_001033297_2_+1  |
| Kiz           | 4.587  | 4.682  | 3.428  | 4.083  | 3.106  | 4.075  | 2.842  | 4.322  | 3.929  | 5.190  | 228730        | KIZ      | NM_001033298_2_+1  |
| Zfp217        | 3.383  | 2.774  | 3.194  | 3.205  | 3.854  | 3.041  | 2.726  | 2.693  | 3.413  | 2.998  | 228913        | ZNF217   | NM_001033299_2_-1  |
| Gmps          | 6.156  | 6.211  | 6.150  | 6.153  | 5.996  | 5.743  | 6.073  | 6.096  | 6.215  | 6.208  | 229363        | GMPS     | NM_001033300_3_+1  |
| Fhdc1         | -4.981 | -3.410 | -4.401 | -1.540 | -3.780 | -0.179 | -3.444 | -0.373 | -1.049 | -1.990 | 229474        | FHDC1    | NM_001033301_3_-1  |
| Ciart         | 2.333  | 1.831  | 0.958  | 0.977  | 1.837  | 1.752  | 0.810  | 1.731  | 0.527  | 0.235  | 229599        | CIART    | NM_001033302_3_-1  |
| Ampd1         | -4.981 | -4.981 | -4.228 | -3.561 | -2.409 | -2.961 | -4.189 | -1.449 | -2.351 | -4.981 | 229665        | AMPD1    | NM_001033303_3_+1  |
| 5330417C22Rik | -4.981 | -2.895 | -3.020 | -2.626 | -1.882 | -2.017 | -4.006 | -3.959 | -4.981 | -3.167 | 229722        | KIAA1324 | NM_001033304_3_-1  |
| Ndufb6        | 7.397  | 7.056  | 6.475  | 6.459  | 6.132  | 6.134  | 6.640  | 6.406  | 5.604  | 5.758  | 230075        | NDUFB6   | NM_001033305_4_-1  |
| Shb           | 2.695  | 2.702  | 1.519  | 1.192  | 2.774  | 2.684  | 2.361  | 1.600  | 2.647  | 2.538  | 230126        | SHB      | NM_001033306_4_-1  |
| Themis2       | 5.754  | 5.295  | 7.140  | 7.096  | 8.214  | 8.233  | 7.797  | 7.695  | 8.690  | 8.666  | 230787        | THEMIS2  | NM_001033308_4_-1  |
| Cox18         | 1.750  | 3.364  | 0.409  | 2.864  | 0.414  | 2.795  | 0.992  | 2.816  | 0.894  | 1.751  | 231430        | COX18    | NM_001033310_5_-1  |
| Vsig10        | -2.413 | -1.015 | 3.527  | 3.240  | 4.168  | 3.875  | 3.063  | 1.888  | -0.072 | 0.233  | 231668        | VSIG10   | NM_001033311_5_+1  |
| Fbxl18        | 0.291  | 0.559  | 1.752  | 1.701  | 1.734  | 1.732  | 1.312  | 0.959  | 1.542  | 1.529  | 231863        | FBXL18   | NM_001033312_5_-1  |
| Pdap1         | 5.246  | 5.070  | 5.129  | 5.124  | 5.201  | 5.153  | 5.586  | 5.099  | 4.605  | 4.279  | 231887        | PDAP1    | NM_001033313_5_-1  |
| Ccdc61        | 3.104  | 3.006  | 2.533  | 2.403  | 3.378  | 3.017  | 3.020  | 2.684  | 3.248  | 3.086  | 232933        | CCDC61   | NM_001033314_7_-1  |
| Ffar3         | -4.981 | -4.981 | -4.216 | -3.542 | -2.082 | -0.775 | -2.177 | -4.099 | -3.373 | -4.981 | 233080        | FFAR3    | NM_001033316_7_-1  |
| Cog7          | 4.374  | 4.434  | 3.869  | 4.228  | 4.657  | 4.834  | 4.428  | 4.231  | 4.561  | 4.602  | 233824        | COG7     | NM_001033318_7_-1  |
| Ppfia1        | 4.073  | 4.225  | 4.660  | 4.572  | 4.831  | 4.851  | 4.599  | 4.694  | 5.134  | 4.995  | 233977        | PPFIA1   | NM_001033319_7_-1  |
| Carmil2       | 1.558  | 1.413  | -0.930 | -0.359 | 0.853  | 1.058  | -0.792 | 0.824  | -1.602 | -1.173 | 234695        | CARMIL2  | NM_001033320_8_+1  |
| Tmem231       | 3.618  | 3.883  | 3.416  | 3.499  | 4.431  | 4.436  | 3.464  | 2.332  | -4.981 | -2.208 | 234740        | TMEM231  | NM_001033321_8_-1  |
| Gucy1a2       | -3.843 | -3.315 | -4.690 | -4.225 | -4.380 | -4.869 | -4.802 | -4.499 | -4.981 | -4.981 | 234889        | GUCY1A2  | NM_001033322_9_+1  |
| Record_remove | -4.981 | -4.981 | -4.966 | -4.966 | -4.523 | -3.640 | -3.787 | -3.254 | -4.981 | -4.981 | Record_remove | NA       | NM_001033323_9_+1  |
| Zbtb16        | -3.414 | -4.981 | -2.883 | -3.693 | 1.131  | -2.228 | 2.646  | -0.788 | 3.418  | 1.162  | 235320        | ZBTB16   | NM_001033324_9_-1  |
| Tmem185a      | 4.754  | 4.841  | 3.498  | 3.705  | 3.895  | 3.936  | 3.696  | 3.904  | 4.474  | 4.469  | 236848        | TMEM185A | NM_001033328_X_-1  |
| Arhgef9       | -3.085 | -0.655 | -1.754 | -3.380 | -2.790 | -0.900 | -4.772 | -1.589 | -4.981 | -1.997 | 236915        | ARHGEF9  | NM_001033329_X_-1  |
| Gas2l3        | -1.175 | 1.923  | 1.351  | 0.522  | -0.884 | -2.168 | 0.462  | 0.028  | 2.046  | 2.032  | 237436        | GAS2L3   | NM_001033331_10_-1 |
| Tmtc3         | -4.817 | -1.954 | -0.863 | 2.124  | -1.873 | -0.321 | -3.686 | -1.977 | -0.544 | -4.981 | 237500        | TMTC3    | NM_001033332_10_-1 |
| Serpina3f     | -0.357 | -4.672 | -0.673 | -4.844 | -1.333 | -4.984 | 0.553  | -4.768 | -4.632 | -4.854 | 238393        | NA       | NM_001033335_12_+1 |
| Abcc4         | 2.729  | 1.675  | 3.768  | 3.490  | 3.299  | 2.539  | 3.502  | 3.491  | 5.260  | 5.478  | 239273        | ABCC4    | NM_001033336_14_-1 |
| Ttc38         | 3.566  | 3.219  | 3.784  | 3.610  | 3.739  | 3.842  | 3.538  | 3.559  | 3.715  | 3.709  | 239570        | TTC38    | NM_001033337_15_+1 |
| Mmp25         | -2.573 | -4.981 | 1.276  | 2.990  | 0.163  | 1.949  | 0.218  | 1.162  | -0.613 | -2.759 | 240047        | MMP25    | NM_001033339_17_-1 |
| Zfp407        | 3.142  | 2.903  | 4.131  | 3.759  | 4.198  | 4.014  | 3.561  | 3.402  | 3.951  | 3.941  | 240476        | ZNF407   | NM_001033341_18_-1 |
| Cdc42bpg      | 0.901  | 1.158  | 0.115  | -0.819 | -0.745 | -0.857 | -1.177 | -0.984 | -1.454 | -0.433 | 240505        | CDC42BPG | NM_001033342_19_+1 |
| Sec31b        | -1.199 | -2.365 | -1.075 | -2.410 | -0.575 | -1.963 | -0.606 | -1.479 | 1.595  | 0.455  | 240667        | SEC31B   | NM_001033343_19_-1 |
| Catip         | -3.349 | -2.160 | 0.302  | -0.554 | -4.895 | -4.976 | -2.115 | -2.251 | -1.107 | -0.342 | 241112        | NA       | NM_001033345_1_+1  |
| Lrrc55        | -4.981 | -4.981 | -4.981 | -4.981 | -4.960 | -4.960 | -4.182 | -4.766 | -4.981 | -4.981 | 241528        | LRRC55   | NM_001033346_2_-1  |
| Ralgapa2      | 2.487  | 3.135  | 2.586  | 2.135  | 3.052  | 2.677  | 2.868  | 2.663  | 3.974  | 4.084  | 241694        | RALGAPA2 | NM_001033348_2_-1  |
| Ankub1        | 1.642  | 0.880  | -4.640 | -4.965 | -2.696 | -4.333 | -4.629 | -3.620 | -4.981 | -4.981 | 242037        | ANKUB1   | NM_001033349_3_-1  |
| Bank1         | 2.978  | 0.310  | 3.139  | 4.549  | 4.998  | 6.402  | 4.450  | 6.356  | 2.878  | 3.335  | 242248        | BANK1    | NM_001033350_3_-1  |
| Grin3a        | -4.981 | -3.598 | -3.924 | -4.872 | -4.337 | -4.067 | -4.966 | -3.828 | -4.981 | -4.981 | 242443        | GRIN3A   | NM_001033351_4_-1  |
| Klhl21        | 3.158  | 2.926  | 2.973  | 2.796  | 2.867  | 3.098  | 3.110  | 3.426  | 4.970  | 4.849  | 242785        | KLHL21   | NM_001033352_4_+1  |
| Zfp568        | -1.168 | -0.349 | 0.364  | -2.918 | -2.946 | -0.440 | -1.442 | -0.300 | -0.551 | -3.730 | 243905        | NA       | NM_001033355_7_+1  |
| Ntn5          | -4.981 | -4.981 | -4.883 | -2.990 | -1.064 | -0.599 | -2.877 | -3.359 | -4.981 | -4.981 | 243967        | NTN5     | NM_001033356_7_+1  |
| Gm614         | -2.388 | -4.981 | -4.099 | -4.059 | -0.952 | -2.564 | -2.762 | -3.328 | -2.077 | -1.991 | 245536        | CXorf65  | NM_001033362_X_-1  |
| Dpcr1         | -4.981 | -4.981 | -3.786 | -3.282 | -4.445 | -4.928 | -4.981 | -4.981 | -4.981 | -4.981 | 268949        | DPCR1    | NM_001033366_17_-1 |
| Nlrc4         | -0.727 | -2.336 | 2.490  | 2.335  | 4.155  | 3.773  | 3.579  | 3.235  | 3.726  | 3.460  | 268973        | NLRC4    | NM_001033367_17_-1 |
| Acvr1c        | -4.981 | -3.534 | -4.843 | -4.184 | -3.199 | -3.211 | -2.581 | -4.780 | -4.981 | -4.981 | 269275        | ACVR1C   | NM_001033369_2_-1  |
| Lrrc36        | -4.981 | -4.981 | -4.508 | -3.318 | -4.907 | -3.841 | -4.562 | -3.562 | -2.174 | -2.788 | 270091        | LRRC36   | NM_001033371_8_+1  |
| A230046K03Rik | 6.175  | 6.342  | 6.819  | 6.593  | 6.727  | 6.740  | 6.482  | 6.478  | 6.352  | 6.747  | 319277        | KIAA1033 | NM_001033375_10_+1 |
| A430078G23Rik | 0.730  | 0.881  | 0.950  | 0.192  | 2.251  | 1.784  | 2.587  | 2.397  | 3.677  | 3.534  | 319493        | NA       | NM_001033378_8_+1  |
| Dcp1b         | 3.607  | 3.857  | 3.205  | 3.374  | 3.488  | 3.406  | 3.460  | 3.368  | 3.376  | 3.427  | 319618        | DCP1B    | NM_001033379_6_+1  |
| Itprlpl2      | 2.304  | 2.264  | 5.059  | 4.713  | 3.192  | 3.119  | 3.880  | 3.918  | 4.273  | 4.518  | 319622        | ITPR1PL2 | NM_001033380_7_-1  |
| Cacna2d4      | 3.857  | 4.015  | -2.089 | -1.404 | -1.993 | -0.680 | -1.952 | -0.557 | -1.992 | -2.228 | 319734        | CACNA2D4 | NM_001033382_6_+1  |
| Zfp865        | 1.255  | 0.942  | 0.757  | 0.221  | 1.192  | 1.006  | 0.626  | 0.292  | 1.352  | 1.460  | 319748        | ZNF865   | NM_001033383_7_+1  |
| Tbc1d32       | 2.169  | 1.956  | 2.686  | 1.986  | 2.737  | 1.822  | 2.728  | 2.197  | 1.583  | 2.070  | 544696        | TBC1D32  | NM_001033385_10_-1 |
| Fubp3         | 1.627  | 1.119  | 0.826  | 1.528  | 1.808  | 0.282  | 0.665  | 0.965  | 2.374  | 2.932  | 320267        | FUBP3    | NM_001033389_2_+1  |
| Ipcef1        | -4.981 | -2.513 | -0.100 | -1.166 | -3.672 | -3.998 | -3.188 | -3.588 | -0.750 | -4.006 | 320495        | IPCEF1   | NM_001033391_10_-1 |
| Tmem104       | 2.693  | 1.570  | 3.235  | 2.747  | 3.879  | 3.120  | 4.745  | 4.183  | 6.668  | 6.049  | 320534        | TMEM104  | NM_001033393_11_+1 |
| Tmem88b       | -3.506 | -2.811 | -3.956 | -1.784 | -4.200 | -4.211 | -4.522 | -4.277 | -3.738 | -3.621 | 320587        | TMEM88B  | NM_001033394_4_-1  |
| Gfod1         | 2.559  | 3.580  | 3.396  | 3.163  | 2.585  | 2.996  | 1.421  | 2.001  | 1.554  | 1.466  | 328232        | GFOD1    | NM_001033399_13_-1 |
| Trem12        | 4.447  | -2.681 | 0.992  | 1.097  | -0.657 | 0.362  | 1.559  | 1.492  | 2.951  | 1.554  | 328833        | TREML2   | NM_001033405_17_+1 |
| Rbm44         | -2.013 | -4.981 | -0.487 | -3.270 | -0.225 | -4.918 | -0.216 | -4.895 | -1.973 | -4.981 | 329207        | RBM44    | NM_001033408_1_+1  |
| Lgr6          | -4.981 | -4.981 | -4.941 | -3.938 | -4.452 | -4.788 | -4.953 | -4.359 | -3.109 | -4.227 | 329252        | LGR6     | NM_001033409_1_-1  |
| Gm826         | -4.981 | -4.981 | -4.821 | -4.973 | -4.678 | -3.930 | -4.849 | -4.117 | -4.981 | -4.981 | 329554        | NA       | NM_001033411_2_-1  |
| Gm829         | 3.598  | 3.688  | -4.981 | -4.981 | -4.971 | -4.663 | -4.940 | -3.689 | -4.981 | -4.981 | 329839        | NA       | NM_001033412_4_+1  |
| Gal3st4       | 2.477  | 1.431  | 0.101  | 0.502  | 2.457  | 2.461  | 2.202  | 1.824  | 2.015  | 1.493  | 330217        | GAL3ST4  | NM_001033416_5_-1  |
| Ceacam16      | 1.684  | 1.100  | -0.647 | -0.548 | 3.731  | 4.287  | 0.989  | 0.759  | -1.816 | -1.537 | 330483        | CEACAM16 | NM_001033419_7_-1  |
| Dock1         | -3.843 | -1.645 | 0.457  | 2.599  | 0.739  | 2.604  | 3.017  | 3.592  | 5.072  | 5.542  | 330662        | DOCK1    | NM_001033420_7_+1  |
| Thoc2         | 6.105  | 6.309  | 6.776  | 6.713  | 6.844  | 6.844  | 6.739  | 6.671  | 6.432  | 6.740  | 331401        | THOC2    | NM_001033422_X_-1  |

|                |        |        |        |        |        |        |        |        |        |        |                 |           |                          |
|----------------|--------|--------|--------|--------|--------|--------|--------|--------|--------|--------|-----------------|-----------|--------------------------|
| Zscan10        | -4.981 | -4.981 | -4.981 | -4.975 | -4.981 | -4.981 | -4.935 | -4.510 | -4.981 | -4.981 | 332221          | ZSCAN10   | NM_001033425_17_+_1      |
| Trim75         | -4.981 | -4.981 | -3.124 | -2.471 | -3.382 | -4.394 | -4.871 | -4.704 | -4.981 | -4.981 | 333307          | NA        | NM_001033429_8_-_1       |
| Kdm7a          | 4.268  | 4.619  | 6.776  | 6.653  | 6.825  | 6.762  | 7.092  | 7.072  | 8.243  | 8.752  | 338523          | KDM7A     | NM_001033430_6_-_1       |
| Nlrp12         | -4.981 | -4.981 | -4.903 | -4.133 | -4.953 | -2.472 | -4.027 | -1.801 | -1.363 | -0.688 | 378425          | NLRP12    | NM_001033431_7_-_1       |
| Heca           | 2.593  | 3.418  | 4.445  | 4.528  | 4.279  | 4.370  | 4.476  | 4.779  | 5.231  | 5.517  | 380629          | HECA      | NM_001033432_10_-_1      |
| Tmem102        | -4.981 | -4.981 | -2.016 | -1.051 | -4.160 | -4.349 | -4.935 | -4.523 | -4.981 | -3.337 | 380705          | TMEM102   | NM_001033433_11_-_1      |
| Milr1          | 5.681  | 5.834  | 3.830  | 3.600  | 4.819  | 4.893  | 4.950  | 4.955  | 5.654  | 5.579  | 380732          | NA        | NM_001033435_11_+_1      |
| Atxn7l1        | 4.113  | 3.784  | 4.253  | 4.069  | 4.046  | 4.380  | 3.840  | 3.944  | 5.035  | 4.755  | 380753          | ATXN7L1   | NM_001033436_12_+_2      |
| Lsmem1         | -4.981 | -4.981 | -4.816 | -3.716 | -4.927 | -3.536 | -2.701 | -2.192 | -4.981 | -4.981 | 380755          | LSMEM1    | NM_001033437_12_-_1      |
| Lrch1          | 3.408  | 4.210  | 3.091  | 3.329  | 3.806  | 3.878  | 3.065  | 3.820  | 3.737  | 4.026  | 380916          | LRCH1     | NM_001033439_14_-_1      |
| Alg10b         | 2.212  | 2.753  | 2.488  | 2.177  | 2.031  | 1.932  | 1.872  | 1.450  | 1.863  | 2.047  | 380959          | ALG10     | NM_001033441_15_+_1      |
| Gm1604b        | -4.981 | -4.981 | -4.698 | -4.613 | -4.977 | -4.977 | -4.900 | -4.733 | -2.193 | -4.519 | 381059          | NA        | NM_001033442_17_+_1      |
| Gm1604b        | -4.981 | -4.981 | -4.698 | -4.613 | -4.977 | -4.977 | -4.900 | -4.733 | -2.193 | -4.519 | 381059          | NA        | NM_001033442_dup1_17_-_1 |
| Cdkl4          | -0.413 | -0.622 | -1.655 | -0.744 | -0.720 | -0.315 | -1.288 | -4.120 | -0.199 | -0.202 | 381113          | CDKL4     | NM_001033443_17_-_1      |
| Garem1         | -1.884 | 1.239  | -4.046 | -0.340 | -3.424 | -0.069 | -2.411 | 0.346  | -3.242 | 1.625  | 381126          | GAREM1    | NM_001033445_18_-_1      |
| Gm960          | -2.842 | -4.981 | -4.612 | -4.983 | -4.691 | -4.969 | -4.335 | -4.208 | -4.190 | -2.895 | 381196          | C11orf80  | NM_001033447_19_-_1      |
| Ap5b1          | 2.611  | 2.819  | 2.909  | 2.961  | 3.298  | 3.129  | 2.817  | 2.751  | 4.496  | 4.146  | 381201          | AP5B1     | NM_001033448_19_+_1      |
| Tmem237        | 0.209  | -0.760 | -1.736 | -2.953 | -0.659 | -0.752 | -1.160 | -1.194 | 0.581  | -0.178 | 381259          | TMEM237   | NM_001033449_1_-_1       |
| Ifi211         | 2.886  | 0.461  | 6.998  | 5.503  | 2.523  | 2.378  | 4.968  | 4.174  | 7.419  | 4.874  | 381308          | IFI16     | NM_001033450_1_-_1       |
| Zfp408         | 2.431  | 2.426  | 3.506  | 3.206  | 3.127  | 2.676  | 2.771  | 2.629  | 3.159  | 2.828  | 381410          | ZNF408    | NM_001033451_2_-_1       |
| Pdp1           | 2.918  | 3.448  | 2.713  | 3.133  | 1.609  | 1.770  | 2.106  | 1.864  | 3.003  | 3.225  | 381511          | PDP1      | NM_001033453_4_-_1       |
| Nom1           | 4.219  | 4.449  | 4.921  | 4.986  | 4.813  | 4.845  | 4.558  | 4.668  | 4.975  | 4.621  | 433864          | NOM1      | NM_001033457_5_+_1       |
| Gm1673         | -3.668 | -4.981 | -2.655 | -2.183 | -2.479 | -3.978 | 0.196  | 1.756  | 3.310  | 3.586  | 381633          | NA        | NM_001033458_5_+_1       |
| Record_removed | -4.981 | -4.981 | -3.076 | -2.934 | -4.820 | -3.451 | -4.960 | -4.934 | -4.981 | -4.981 | Record_removeNA |           | NM_001033459_5_+_1       |
| Tatdn2         | 1.489  | 1.527  | 1.523  | 0.810  | 1.695  | 1.721  | 1.537  | 0.860  | 1.626  | 0.902  | 381801          | TATDN2    | NM_001033463_6_+_1       |
| Cracr2a        | 1.079  | 1.554  | -0.186 | -0.880 | -0.228 | -0.800 | -0.853 | -1.050 | 0.697  | -0.113 | 381812          | CRACR2A   | NM_001033464_6_+_1       |
| 6430531B16Rik  | -3.843 | -1.612 | 1.831  | 1.950  | 0.308  | 0.556  | -0.284 | -1.023 | -1.183 | -2.250 | 381933          | NA        | NM_001033465_7_-_1       |
| Zbtb2          | 3.401  | 3.709  | 3.002  | 2.871  | 3.289  | 3.241  | 3.184  | 3.349  | 4.329  | 4.456  | 381990          | ZBTB2     | NM_001033466_10_-_1      |
| Adgrg5         | 0.077  | 3.561  | 2.338  | 2.088  | 4.101  | 5.747  | 2.250  | 3.724  | -2.057 | 4.123  | 382045          | ADGRG5    | NM_001033468_8_+_1       |
| Foxr1          | 5.037  | 5.427  | -0.524 | -0.549 | 1.881  | 2.244  | 0.064  | -0.725 | -1.950 | -1.918 | 382074          | FOXR1     | NM_001033469_9_-_1       |
| A830080D01Rik  | 3.624  | 3.637  | 4.018  | 4.017  | 4.067  | 4.148  | 4.170  | 4.240  | 3.602  | 4.309  | 382252          | CXorf23   | NM_001033472_X_+_1       |
| Atxn7l3b       | 7.441  | 7.579  | 7.153  | 7.235  | 7.130  | 7.338  | 7.232  | 7.311  | 7.048  | 7.138  | 382423          | ATXN7L3B  | NM_001033474_10_-_1      |
| Tmed8          | 3.927  | 3.760  | 3.482  | 3.421  | 4.057  | 3.665  | 3.523  | 3.253  | 3.759  | 3.826  | 382620          | TMED8     | NM_001033475_12_-_1      |
| Myrf           | -3.349 | -4.981 | -2.267 | -2.641 | -4.988 | -4.459 | -4.675 | -3.118 | -1.069 | -0.084 | 225908          | MYRF      | NM_001033481_19_-_1      |
| Igap3          | -2.362 | -4.981 | 1.155  | 1.487  | 2.343  | 1.166  | 2.034  | 0.439  | 1.401  | 0.728  | 404710          | IQGAP3    | NM_001033484_3_+_1       |
| Mfsd2b         | -2.388 | 0.482  | -0.590 | 1.993  | 0.344  | 2.120  | -0.178 | 2.453  | 1.320  | 1.114  | 432628          | MFSD2B    | NM_001033488_12_-_1      |
| Rnf207         | -4.981 | -4.981 | -3.918 | -4.167 | -4.150 | -3.109 | -4.963 | -3.720 | -3.738 | -4.981 | 433809          | RNF207    | NM_001033489_4_-_1       |
| Pusl1          | 3.709  | 3.824  | 3.406  | 3.229  | 2.632  | 2.677  | 2.593  | 2.974  | 2.609  | 3.117  | 433813          | PUSL1     | NM_001033490_4_-_1       |
| Adgrf2         | -4.981 | -4.981 | -3.117 | -4.925 | -4.706 | -4.384 | -3.754 | -4.880 | -2.780 | -4.981 | 435529          | ADGRF2    | NM_001033493_17_-_1      |
| Zfp213         | 2.963  | 2.850  | 2.525  | 2.604  | 2.696  | 2.476  | 2.019  | 2.292  | 2.769  | 2.876  | 449521          | ZNF213    | NM_001033496_17_-_1      |
| Gramd2         | -4.981 | -2.437 | 4.240  | 4.214  | -4.977 | -4.483 | -3.898 | -0.089 | -4.394 | -4.981 | 546134          | GRAMD2    | NM_001033498_9_+_1       |
| Kcnk6          | 1.512  | 0.459  | 5.043  | 5.076  | 6.022  | 6.077  | 5.188  | 4.577  | 4.425  | 4.878  | 52150           | KCNK6     | NM_001033525_7_-_1       |
| Usp36          | 2.905  | 2.534  | 3.197  | 2.966  | 3.196  | 3.179  | 3.582  | 3.324  | 4.152  | 3.534  | 72344           | USP36     | NM_001033528_11_-_1      |
| AW146154       | 3.079  | 3.308  | 2.919  | 2.613  | 2.938  | 3.075  | 3.101  | 2.621  | 1.301  | 2.537  | 101835          | NA        | NM_001033530_7_-_1       |
| Klhl32         | -1.309 | -2.491 | -4.976 | -4.976 | -1.870 | -3.087 | -4.110 | -4.793 | -4.981 | -4.981 | 212390          | KLHL32    | NM_001033531_4_-_1       |
| AW554918       | 2.618  | 2.421  | 2.579  | 2.226  | 3.171  | 2.961  | 3.027  | 2.406  | 2.792  | 2.280  | 225289          | KIAA1328  | NM_001033532_18_+_1      |
| Ccdc102a       | 3.454  | 2.518  | 6.161  | 4.541  | 6.446  | 6.003  | 5.944  | 5.247  | 4.246  | 5.455  | 234582          | CCDC102A  | NM_001033533_8_-_1       |
| Layn           | -4.981 | -4.981 | -4.254 | -2.549 | -4.894 | -4.954 | -2.707 | -0.539 | 1.923  | 2.330  | 244864          | LAYN      | NM_001033534_9_-_1       |
| Tnfaip8l3      | -4.981 | -4.981 | -1.733 | -0.734 | -3.688 | -1.825 | -3.372 | -3.999 | -2.351 | -2.305 | 244882          | TNFAIP8L3 | NM_001033535_9_-_1       |
| Rfx7           | 5.347  | 5.123  | 5.780  | 5.565  | 5.722  | 5.715  | 5.102  | 5.123  | 4.364  | 4.583  | 319758          | RFX7      | NM_001033536_9_+_1       |
| Pgap3          | 2.476  | 2.755  | 0.730  | 0.966  | 1.178  | 1.437  | 0.815  | 0.825  | 0.842  | 0.645  | 320655          | PGAP3     | NM_001033537_11_-_1      |
| Bex6           | 2.854  | 0.397  | 1.971  | 1.489  | 7.259  | 7.213  | 6.261  | 5.096  | 2.371  | 1.709  | 328660          | NA        | NM_001033539_16_+_1      |
| Gm5113         | -0.537 | -0.997 | -0.162 | 0.022  | -0.201 | 0.357  | 0.069  | -0.557 | 1.036  | 0.337  | 330503          | NA        | NM_001033540_7_+_1       |
| Gm5127         | -4.981 | -4.981 | -3.703 | -4.181 | -2.620 | -4.242 | -2.171 | -4.942 | -0.911 | -1.783 | 331493          | NA        | NM_001033541_X_+_1       |
| Il20rb         | -1.020 | 0.303  | -0.994 | -1.799 | -1.489 | -2.689 | -0.735 | -1.287 | 0.217  | -0.504 | 213208          | IL20RB    | NM_001033543_9_-_1       |
| Dnaaf3         | 0.592  | -1.799 | 3.036  | 1.024  | 2.944  | 0.777  | 3.278  | 0.401  | 2.307  | 0.800  | 436022          | DNAAF3    | NM_001033548_7_-_1       |
| Lrrc8b         | -0.068 | -0.154 | 0.527  | -0.369 | 0.525  | 0.365  | 2.034  | 1.738  | 4.284  | 4.096  | 433926          | LRRC8B    | NM_001033550_5_+_1       |
| Zdhhc6         | 1.331  | 1.908  | 1.756  | 2.137  | 1.984  | 2.217  | 2.486  | 1.615  | 2.273  | 1.834  | 66980           | ZDHHC6    | NM_001033573_19_-_1      |
| Acsl6          | -4.981 | -4.981 | -4.970 | -4.144 | -2.909 | -4.832 | -4.844 | -3.409 | -4.981 | -4.626 | 216739          | ACSL6     | NM_001033597_11_+_1      |
| Acsl6          | -4.981 | -4.981 | -4.946 | -2.500 | -4.978 | -3.506 | -4.891 | -2.433 | -4.981 | -4.004 | 216739          | ACSL6     | NM_001033598_11_+_1      |
| Acsl6          | -4.981 | -4.981 | -4.938 | -3.398 | -4.864 | -3.204 | -4.954 | -3.005 | -4.981 | -4.947 | 216739          | ACSL6     | NM_001033599_11_+_1      |
| Acsl4          | 4.047  | 3.444  | 3.228  | 2.686  | 2.682  | 0.706  | 2.707  | 2.588  | 2.176  | 0.987  | 50790           | ACSL4     | NM_001033600_X_-_1       |
| Acsl3          | -2.008 | -4.775 | 1.158  | 0.213  | 1.249  | 0.347  | 1.658  | 2.265  | 1.974  | 2.261  | 74205           | ACSL3     | NM_001033606_1_+_1       |
| 231006104Rik   | 3.075  | 3.427  | 2.964  | 2.679  | 2.963  | 2.884  | 2.466  | 2.433  | 2.436  | 2.578  | 69662           | C6orf136  | NM_001033630_17_-_1      |
| Ifitm6         | 0.902  | -0.100 | 4.782  | 4.266  | 7.939  | 7.643  | 8.201  | 7.262  | 8.523  | 7.899  | 213002          | NA        | NM_001033632_7_-_1       |
| Slc2a13        | -4.981 | -4.981 | -2.064 | -4.164 | -1.769 | -2.094 | -4.983 | -4.605 | -4.981 | -4.981 | 239606          | SLC2A13   | NM_001033633_15_-_1      |
| Zyg11b         | 3.608  | 3.869  | 4.532  | 4.332  | 4.249  | 4.151  | 4.294  | 3.874  | 4.469  | 4.536  | 414872          | ZYG11B    | NM_001033634_4_-_1       |
| Prex2          | -2.382 | -3.286 | -1.150 | -2.454 | -2.804 | -3.718 | -2.447 | -3.916 | -3.186 | -2.603 | 109294          | PREX2     | NM_001033636_1_+_1       |
| Pus10          | 2.979  | 2.291  | 2.202  | 2.398  | 2.037  | 2.230  | 2.280  | 2.027  | 2.016  | 2.207  | 74467           | PUS10     | NM_001033654_11_+_1      |
| Dnah1          | -0.200 | -0.752 | -1.105 | -0.603 | -3.695 | -1.564 | -1.841 | -2.017 | -4.981 | -3.758 | 110084          | DNAH1     | NM_001033668_14_-_1      |
| Fbxw10         | 1.882  | 3.535  | 0.914  | 1.894  | 1.305  | 2.429  | 0.618  | 1.942  | 0.772  | 2.116  | 213980          | FBXW10    | NM_001033669_11_+_1      |
| Evi2a          | 6.865  | 7.228  | 5.517  | 5.540  | 6.338  | 6.807  | 5.544  | 5.612  | 5.134  | 5.365  | 14017           | EV12A     | NM_001033711_11_-_1      |
| Mef2a          | 2.030  | 2.679  | -1.462 | -0.946 | -0.417 | 0.049  | -0.245 | -0.364 | 3.628  | 3.464  | 17258           | MEF2A     | NM_001033713_7_-_1       |
| Tmem2          | 2.310  | 1.626  | 1.516  | 1.570  | 2.119  | 0.212  | 2.222  | 2.491  | 3.407  | 3.743  | 83921           | TMEM2     | NM_001033759_19_+_1      |

|               |        |        |        |        |        |        |        |        |        |        |        |                 |                    |
|---------------|--------|--------|--------|--------|--------|--------|--------|--------|--------|--------|--------|-----------------|--------------------|
| 4931408C20Rik | -4.981 | -4.981 | -4.877 | -3.839 | -4.972 | -3.291 | -4.589 | 1.241  | -4.981 | 4.883  | 210940 | NA              | NM_001033764_1_-1  |
| Gm4951        | 1.029  | -4.981 | 0.068  | -2.412 | -0.404 | -2.620 | -0.414 | -1.693 | -0.938 | -2.331 | 240327 | NA              | NM_001033767_18_+1 |
| Pin1rt1       | -4.981 | -3.408 | -4.958 | -4.958 | -4.978 | -4.978 | -4.520 | -4.958 | -4.981 | -4.057 | 241593 | NA              | NM_001033768_2_-1  |
| B020031M17Rik | -1.599 | -2.316 | -4.831 | -3.517 | -4.961 | -4.961 | -4.848 | -4.973 | -4.981 | -4.981 | 333467 | NA              | NM_001033769_13_-1 |
| Gm5544        | -2.647 | -4.981 | -1.986 | -1.867 | -4.050 | -4.258 | -2.853 | -4.230 | -2.905 | -3.459 | 433632 | NA              | NM_001033779_3_+1  |
| I830077J02Rik | 6.500  | 6.521  | 6.360  | 6.285  | 7.922  | 8.246  | 7.073  | 6.771  | 5.808  | 5.950  | 433638 | C1orf162        | NM_001033780_3_-1  |
| Gm5615        | -4.981 | -4.981 | -4.821 | -4.973 | -4.981 | -4.981 | -4.461 | -4.861 | -2.848 | -4.342 | 434396 | NA              | NM_001033783_9_-1  |
| Akap14        | -1.818 | -4.981 | -3.478 | -4.951 | -3.017 | -4.216 | -4.967 | -3.871 | -3.750 | -3.758 | 434756 | AKAP14          | NM_001033785_X_-1  |
| Gm5820        | -4.981 | -4.981 | -4.503 | -3.963 | -2.569 | -3.134 | -2.467 | -1.592 | -1.690 | 0.362  | 545253 | NA              | NM_001033789_18_+1 |
| B020004J07Rik | -4.981 | -4.981 | -4.727 | -4.719 | -4.305 | -4.353 | -4.971 | -4.977 | -4.981 | -4.981 | 545662 | NA              | NM_001033790_4_-1  |
| Tmem253       | -0.518 | -1.399 | -3.120 | -2.991 | -3.243 | -3.666 | -2.899 | -3.984 | -4.394 | -3.797 | 619301 | TMEM253         | NM_001033805_14_+1 |
| Zfp872        | -2.273 | -4.981 | 1.238  | -4.892 | -0.924 | -4.101 | -2.152 | -4.364 | -4.981 | -4.981 | 619310 | NA              | NM_001033813_9_+1  |
| Zfp551        | 0.425  | 0.674  | -1.764 | -0.938 | -2.421 | -0.171 | -1.173 | -1.162 | -4.981 | -0.407 | 619331 | ZNFS51          | NM_001033820_7_-1  |
| Cpne8         | 1.386  | -0.987 | 2.093  | 4.358  | 0.730  | -0.797 | -0.028 | -0.220 | -0.082 | 0.126  | 66871  | CPNE8           | NM_001033851_15_-1 |
| Rps27a        | 5.652  | 5.471  | 5.479  | 6.010  | 5.615  | 6.172  | 5.754  | 5.803  | 4.732  | 4.444  | 78294  | RPS27A          | NM_001033865_11_-1 |
| Smagp         | 0.717  | -1.908 | 4.539  | 4.447  | 4.237  | 4.056  | 3.951  | 3.396  | 2.244  | 1.430  | 207818 | SMAGP           | NM_001033872_15_-1 |
| Ak8           | 5.856  | 6.075  | 0.494  | 0.184  | -2.625 | -2.766 | 0.039  | 0.538  | 2.689  | 2.472  | 68870  | AK8             | NM_001033874_2_+1  |
| Ctrc          | -3.563 | -4.981 | 0.932  | 0.474  | 0.680  | 1.161  | -0.081 | -2.648 | -4.981 | -4.342 | 76701  | CTRC            | NM_001033875_4_-1  |
| Adamts17      | -4.981 | -2.600 | -4.754 | -4.438 | -4.678 | -4.046 | -4.974 | -3.605 | -4.256 | -4.203 | 233332 | ADAMTS17        | NM_001033877_7_+1  |
| Med22         | 2.868  | 2.801  | 0.649  | 0.388  | 0.398  | 0.420  | 0.469  | -1.326 | -1.203 | -1.732 | 20933  | MED22           | NM_001033908_2_-1  |
| Trem14        | 1.858  | 0.166  | 6.038  | 5.875  | 3.780  | 3.181  | 5.209  | 5.696  | 4.974  | 5.554  | 224840 | NA              | NM_001033922_17_+1 |
| Thns12        | 4.555  | 3.199  | 1.454  | -0.337 | -0.793 | -1.828 | -0.660 | -3.433 | -0.877 | -4.981 | 232078 | THNSL2          | NM_001033929_6_-1  |
| Rabgap1       | 0.670  | -0.869 | 1.628  | 0.541  | 1.028  | -0.879 | -0.179 | -1.133 | -0.074 | 0.156  | 227800 | RABGAP1         | NM_001033960_2_+1  |
| Ube3a         | 5.524  | 5.581  | 5.785  | 5.567  | 5.157  | 5.243  | 5.489  | 4.696  | 4.589  | 5.417  | 22215  | UBE3A           | NM_001033962_7_+1  |
| Ak2           | 4.228  | 4.098  | 3.481  | 3.696  | 3.344  | 3.599  | 3.613  | 3.670  | 2.635  | 2.906  | 11637  | AK2             | NM_001033966_4_+1  |
| H2-Eb2        | 4.742  | 3.570  | 3.660  | 4.943  | 6.779  | 7.035  | 5.864  | 4.572  | -1.778 | -1.753 | 381091 | NA              | NM_001033978_17_+1 |
| Ldlrad2       | -3.563 | -4.981 | -4.221 | -4.578 | -4.019 | -4.722 | -4.177 | -4.480 | -4.981 | -4.981 | 435811 | LDLRAD2         | NM_001033979_4_-1  |
| Hbq1b         | -3.843 | 0.213  | -3.398 | 0.943  | -2.054 | 1.242  | -1.987 | 0.764  | -4.190 | -1.737 | 544763 | HBQ1            | NM_001033981_11_+1 |
| Ncoa4         | 5.397  | 5.415  | 5.144  | 5.407  | 5.183  | 5.118  | 5.124  | 5.762  | 5.566  | 5.640  | 27057  | NCOA4           | NM_001033988_14_+1 |
| Il17re        | -4.981 | -4.981 | -4.748 | -3.435 | -4.934 | -2.614 | -4.844 | -3.544 | -4.743 | -4.364 | 57890  | IL17RE          | NM_001034029_6_+1  |
| Limk2         | -4.981 | -4.981 | -4.981 | -4.981 | -4.981 | -4.981 | -4.958 | -4.511 | -4.888 | -4.978 | 16886  | LIMK2           | NM_001034030_11_-1 |
| Il17re        | -4.981 | -4.981 | -4.865 | -4.092 | -4.971 | -4.928 | -4.934 | -4.494 | -4.825 | -4.851 | 57890  | IL17RE          | NM_001034031_6_+1  |
| Rufy4         | -0.511 | -1.567 | -4.068 | -4.315 | -4.996 | -3.060 | -2.397 | -3.888 | -4.056 | -4.393 | 435626 | RUFY4           | NM_001034060_1_+1  |
| Ppp2r1b       | -2.134 | -0.885 | 0.302  | 0.360  | -0.096 | -0.808 | -0.141 | -0.774 | 0.899  | 1.010  | 73699  | PPP2R1B         | NM_001034085_9_+1  |
| Tnfsf13       | -4.852 | -4.981 | -0.667 | -1.397 | -4.254 | -3.198 | -1.027 | 0.031  | 3.421  | 1.261  | 619441 | TNFSF12-TNFSF13 | NM_001034097_11_-1 |
| Shank1        | -3.099 | -2.124 | -3.228 | -2.554 | -0.691 | -0.035 | -1.326 | -0.918 | -3.750 | -2.382 | 243961 | SHANK1          | NM_001034115_7_+1  |
| Ank2          | -4.981 | -4.981 | -3.866 | -2.349 | -3.302 | -4.624 | -3.661 | -4.580 | -4.981 | -4.965 | 109676 | NA              | NM_001034168_3_-1  |
| Fam134b       | 2.126  | 3.107  | 3.960  | 4.148  | 5.131  | 5.348  | 4.197  | 3.464  | 3.881  | 2.506  | 66270  | FAM134B         | NM_001034851_15_+1 |
| Armc2         | -1.093 | -1.031 | -4.967 | -3.338 | -2.764 | -3.870 | -2.688 | -3.203 | -3.109 | -4.981 | 213402 | ARMC2           | NM_001034858_10_-1 |
| Gm4841        | -3.668 | -1.739 | -3.556 | -1.996 | -3.806 | -2.759 | -3.171 | -4.149 | -4.255 | -2.387 | 225594 | NA              | NM_001034859_18_-1 |
| Erich1        | 3.390  | 3.394  | 4.174  | 4.215  | 3.768  | 3.502  | 4.328  | 3.861  | 3.375  | 3.281  | 234086 | ERIC1           | NM_001034862_8_-1  |
| Pnlcd1        | -1.275 | -4.981 | -1.106 | -3.707 | -3.429 | -4.937 | -3.341 | -4.578 | -1.933 | -4.981 | 240023 | PNLCD1          | NM_001034866_17_-1 |
| Pm20d2        | -3.843 | -4.981 | -4.923 | -2.791 | -4.963 | -4.540 | -4.096 | -3.447 | -4.981 | -4.981 | 242377 | PM20D2          | NM_001034867_4_-1  |
| Bpifb4        | -4.981 | -4.981 | -4.981 | -4.981 | -2.628 | -3.667 | -2.672 | -3.912 | -4.981 | -4.981 | 381399 | BPIFB4          | NM_001034875_2_+1  |
| Ccdc24        | -4.981 | -1.518 | -4.388 | -2.513 | -4.977 | -4.682 | -4.981 | -4.981 | -4.981 | -4.981 | 381546 | NA              | NM_001034876_4_-1  |
| Gm5464        | -1.179 | 0.010  | 0.789  | -0.094 | -1.677 | -0.931 | -1.562 | -1.802 | -0.826 | -1.625 | 432870 | NA              | NM_001034881_14_+1 |
| Kbtbd6        | -2.295 | -4.981 | 0.372  | -0.266 | 0.480  | -0.622 | -0.018 | -0.422 | -0.457 | -0.793 | 432879 | KBTBD6          | NM_001034882_14_+1 |
| Pnp1a1        | -2.559 | -4.981 | -4.285 | -4.780 | -4.294 | -4.968 | -4.730 | -4.421 | -1.051 | -4.981 | 433091 | PNPLA1          | NM_001034885_17_+1 |
| Ermard        | -4.981 | -4.981 | -4.187 | -4.083 | -3.941 | -4.969 | -4.512 | -3.492 | 0.455  | 0.098  | 381062 | ERMARD          | NM_001034891_17_+1 |
| Zfr2          | -0.604 | -0.559 | -1.823 | -0.275 | -1.677 | 0.856  | -1.936 | -2.025 | -3.204 | -0.523 | 103406 | ZFR2            | NM_001034895_10_+1 |
| Ms4a15        | -3.668 | -4.981 | -4.941 | -4.941 | -4.013 | -3.753 | -4.753 | -4.973 | -4.981 | -4.981 | 545279 | MS4A15          | NM_001034898_19_-1 |
| Gm16432       | -4.981 | -4.981 | -1.759 | -0.847 | -3.795 | -3.571 | -4.417 | -4.764 | -4.981 | -4.316 | 545391 | NA              | NM_001034899_1_+1  |
| Zfp345        | -3.843 | 0.650  | -2.566 | -0.043 | -2.374 | 0.209  | -2.096 | -1.342 | -4.981 | -0.548 | 545471 | NA              | NM_001034900_2_-1  |
| Mansc4        | 3.037  | 1.325  | -2.441 | -3.648 | -3.895 | -3.808 | -4.380 | -5.005 | -2.434 | -3.797 | 545893 | MANSC4          | NM_001034903_6_-1  |
| Trim43a       | -4.981 | -4.981 | -4.979 | -4.395 | -4.980 | -4.153 | -4.753 | -4.691 | -4.190 | -4.316 | 547109 | NA              | NM_001034906_9_+1  |
| Zc3h12b       | 1.925  | 2.197  | -2.741 | -3.603 | -1.238 | -2.051 | -3.582 | -4.419 | -3.925 | -3.855 | 547176 | ZC3H12B         | NM_001034907_X_+1  |
| Gm6034        | 2.754  | 1.230  | 1.159  | 1.044  | 1.356  | 1.169  | 1.063  | 0.461  | -0.182 | -2.016 | 547347 | NA              | NM_001034909_17_+1 |
| Defb42        | -1.535 | -4.981 | -2.337 | 0.079  | 1.751  | 3.265  | -0.343 | -0.071 | -4.981 | -4.981 | 619548 | NA              | NM_001034910_14_+1 |
| Sorbs1        | -4.626 | -4.981 | -1.384 | -4.906 | -1.842 | -2.489 | -3.033 | -0.850 | -1.993 | -2.512 | 20411  | SORBS1          | NM_001034962_19_-1 |
| Sorbs1        | -4.556 | -2.611 | -1.745 | -2.606 | -2.170 | -1.539 | -0.923 | -1.751 | -0.164 | -2.288 | 20411  | SORBS1          | NM_001034963_19_-1 |
| Sorbs1        | -0.002 | 1.812  | -1.676 | -0.835 | -0.162 | 1.116  | -0.280 | 0.636  | 1.303  | 0.966  | 20411  | SORBS1          | NM_001034964_19_-1 |
| Golm1         | 4.665  | 5.215  | 3.025  | 3.832  | 1.965  | 2.876  | 3.823  | 4.387  | 4.848  | 5.111  | 105348 | GOLM1           | NM_001035122_13_-1 |
| Setd6         | 4.482  | 4.320  | 3.184  | 3.235  | 3.850  | 3.923  | 3.624  | 3.759  | 3.769  | 3.360  | 66083  | SETD6           | NM_001035123_8_+1  |
| Xpo1          | 5.301  | 5.455  | 5.832  | 5.909  | 6.299  | 6.340  | 6.114  | 5.794  | 5.319  | 5.679  | 103573 | XPO1            | NM_001035226_11_+1 |
| St3gal5       | 0.526  | 4.639  | 7.018  | 6.642  | 5.938  | 4.956  | 5.508  | 4.815  | 5.579  | 2.643  | 20454  | ST3GAL5         | NM_001035228_6_+1  |
| Zfp748        | 2.302  | 2.549  | 2.871  | 2.765  | 3.069  | 3.258  | 3.577  | 2.938  | 3.299  | 3.777  | 212276 | NA              | NM_001035231_13_-1 |
| Trpm3         | -2.483 | -4.981 | -4.981 | -4.981 | -4.600 | -4.018 | -3.167 | -4.396 | -4.981 | -2.088 | 226025 | TRPM3           | NM_001035244_19_+1 |
| Trpm3         | -4.981 | -4.981 | -4.398 | -4.981 | -4.027 | -4.698 | -4.961 | -4.971 | -4.981 | -4.227 | 226025 | TRPM3           | NM_001035246_19_+1 |
| Zcchc18       | 4.450  | 4.318  | -0.354 | -2.279 | 0.225  | -0.254 | -2.095 | 0.145  | -3.964 | -1.720 | 66995  | ZCCHC18         | NM_001035509_X_+1  |
| Zcchc18       | 2.797  | 0.985  | -4.809 | -1.612 | -1.992 | -3.348 | -4.612 | -0.931 | -2.989 | -4.970 | 66995  | ZCCHC18         | NM_001035510_X_+1  |
| AU040320      | -3.785 | -1.333 | -2.271 | -2.157 | -2.335 | -2.451 | -2.626 | -4.150 | -1.875 | -4.167 | 100317 | KIAA0319L       | NM_001035525_4_+1  |
| AU040320      | -1.527 | -2.404 | -3.237 | -3.420 | -2.634 | -4.049 | -3.727 | -4.409 | -4.873 | -1.692 | 100317 | KIAA0319L       | NM_001035526_4_+1  |
| Akap2         | 1.429  | 1.560  | 3.685  | 3.746  | 2.701  | 1.285  | 0.248  | 0.652  | -4.981 | -4.281 | 11641  | AKAP2           | NM_001035532_4_+1  |
| Akap2         | -4.456 | -3.492 | -3.974 | -4.513 | -4.872 | -4.967 | -2.585 | -1.750 | -4.981 | -4.214 | 11641  | AKAP2           | NM_001035533_4_+1  |

|               |         |        |        |        |        |        |        |        |        |        |        |                  |                     |
|---------------|---------|--------|--------|--------|--------|--------|--------|--------|--------|--------|--------|------------------|---------------------|
| Ap2b1         | 3.047   | 3.508  | 4.732  | 4.771  | 3.632  | 3.722  | 3.597  | 3.421  | 3.637  | 3.752  | 71770  | NA               | NM_001035854_11_+_1 |
| Nrbf2         | 5.578   | 5.420  | 5.802  | 5.846  | 6.973  | 6.590  | 6.003  | 5.465  | 5.495  | 5.401  | 641340 | NRBF2            | NM_001036293_10_-_1 |
| Atp2b2        | -4.981  | 0.164  | -0.499 | -1.033 | -0.063 | -0.551 | -1.080 | -4.618 | -2.469 | -4.981 | 11941  | ATP2B2           | NM_001036684_6_-_1  |
| B3gnt8        | 4.255   | 4.628  | -0.718 | -0.859 | 1.269  | 1.790  | 1.843  | 1.871  | 3.478  | 3.587  | 232984 | B3GNT8           | NM_001036740_7_+_1  |
| Nacc2         | -1.359  | -3.982 | -2.610 | -4.842 | -3.758 | -4.902 | -4.575 | -3.365 | -1.632 | -2.204 | 67991  | NACC2            | NM_001037098_2_-_1  |
| Cacnb4        | -3.680  | -3.194 | -4.134 | -4.528 | -4.624 | -4.894 | -4.288 | -4.790 | -4.310 | -4.631 | 12298  | CACNB4           | NM_001037099_2_-_1  |
| Ccne2         | -4.471  | -3.471 | -3.788 | -1.506 | -0.442 | -2.869 | -0.253 | -1.918 | -1.114 | -4.424 | 12448  | CCNE2            | NM_001037134_4_+_1  |
| Agap1         | 0.097   | -0.666 | 0.336  | -2.619 | 1.171  | 1.086  | 1.508  | 0.087  | 1.465  | 0.627  | 347722 | AGAP1            | NM_001037136_1_+_1  |
| Gm4925        | 1.634   | 1.050  | -1.818 | -1.647 | -0.540 | -2.408 | -0.928 | -1.754 | -0.662 | -1.637 | 237433 | NA               | NM_001037166_10_-_1 |
| Tomm40l       | 4.696   | 3.719  | 3.973  | 3.932  | 4.238  | 4.002  | 4.149  | 3.759  | 4.094  | 3.382  | 641376 | TOMM40L          | NM_001037170_1_-_1  |
| Nfatc2        | -0.719  | -1.830 | -0.029 | 1.130  | 1.513  | 1.899  | -1.212 | -1.404 | -1.558 | -1.078 | 18019  | NFATC2           | NM_001037177_2_-_1  |
| Nfatc2        | -4.981  | -4.981 | -4.975 | -4.981 | -4.981 | -4.981 | -4.981 | -4.981 | -4.874 | -4.981 | 18019  | NFATC2           | NM_001037178_2_-_1  |
| Samd4         | -4.494  | -4.630 | -4.016 | -4.959 | -3.539 | -4.847 | -4.754 | -3.007 | -4.981 | -4.943 | 74480  | SAMD4A           | NM_001037221_14_+_1 |
| 2700094K13Rik | 3.839   | 3.424  | 3.400  | 3.423  | 3.695  | 3.395  | 3.972  | 3.222  | 2.451  | 1.567  | 72657  | SELENOH          | NM_001037279_2_-_1  |
|               | Alpk2   | -0.652 | -4.981 | 1.364  | 0.750  | 2.458  | 1.960  | 0.364  | -0.444 | -1.532 | -3.758 | 225638           | ALPK2               |
| Piezo1        | 2.090   | 1.119  | 5.578  | 5.700  | 5.194  | 4.899  | 5.430  | 5.317  | 6.055  | 6.233  | 234839 | PIEZO1           | NM_001037298_8_-_1  |
| Fbxo40        | -4.981  | -4.981 | -2.004 | -2.575 | -2.800 | -3.472 | -4.740 | -4.881 | -2.747 | -4.981 | 207215 | FBXO40           | NM_001037321_16_-_1 |
| Cstf3         | 2.521   | 3.176  | 2.983  | 2.902  | 2.605  | 3.087  | 2.413  | 2.677  | 1.257  | 1.258  | 228410 | CSTF3            | NM_001037326_2_+_1  |
| Slc41a3       | -4.608  | -4.186 | -2.848 | -1.731 | -2.411 | -3.629 | 0.297  | -1.295 | -2.635 | -1.165 | 71699  | SLC41A3          | NM_001037493_6_+_1  |
| Oosp2         | -4.981  | -4.981 | -2.845 | -2.648 | -4.955 | -2.872 | -4.973 | -3.780 | -4.981 | -4.981 | 225922 | OOSP2            | NM_001037634_19_-_1 |
| Zfp1          | 4.791   | 4.395  | 3.119  | 2.958  | 3.377  | 3.657  | 3.022  | 2.612  | 2.491  | 2.230  | 22640  | ZFP1             | NM_001037665_8_+_1  |
| Zfp27         | 0.786   | 2.382  | 0.669  | 1.544  | 1.616  | 1.730  | 1.626  | 0.544  | -1.210 | 1.458  | 22689  | ZNF585A          | NM_001037707_7_-_1  |
| Rusc2         | -4.981  | -2.658 | -3.700 | -3.980 | -4.349 | -4.842 | -3.868 | -4.985 | 1.084  | 0.726  | 100213 | RUSC2            | NM_001037709_4_+_1  |
| Cgn           | -4.981  | -4.981 | -4.960 | -4.053 | -4.761 | -4.395 | -3.936 | -4.428 | -4.981 | -4.981 | 70737  | CGN              | NM_001037711_3_-_1  |
| Kcnh6         | -4.981  | -4.981 | -3.086 | -4.987 | -3.359 | -4.914 | -3.424 | -4.796 | -3.823 | -3.210 | 192775 | KCNH6            | NM_001037712_11_+_1 |
| Xaf1          | 5.302   | 4.928  | 4.190  | 3.330  | 5.863  | 5.056  | 6.021  | 5.020  | 5.756  | 4.983  | 327959 | XAF1             | NM_001037713_11_+_1 |
| Slc38a6       | 2.135   | 2.102  | 1.445  | 1.760  | 1.674  | 1.799  | 1.525  | 1.966  | 1.467  | 2.108  | 625098 | SLC38A6          | NM_001037717_12_+_1 |
| Btla          | 4.800   | 5.908  | 7.919  | 8.371  | 4.595  | 4.299  | 5.255  | 5.521  | 4.344  | 1.300  | 208154 | BTLA             | NM_001037719_16_+_1 |
| Adam15        | 1.904   | 0.905  | 1.321  | 1.037  | 1.514  | 2.276  | 3.671  | 4.354  | 6.968  | 7.103  | 11490  | ADAM15           | NM_001037722_3_-_1  |
| Adcy7         | 6.345   | 6.171  | 5.778  | 5.657  | 6.607  | 6.715  | 5.643  | 5.177  | 4.824  | 4.111  | 11513  | ADCY7            | NM_001037723_8_+_1  |
| Adcy7         | 4.796   | 5.723  | 5.512  | 5.360  | 6.342  | 6.413  | 6.349  | 6.484  | 7.083  | 7.028  | 11513  | ADCY7            | NM_001037724_8_+_1  |
| Fam117b       | 4.819   | 4.695  | 5.428  | 5.161  | 4.837  | 4.770  | 5.390  | 5.459  | 7.132  | 6.902  | 72750  | FAM117B          | NM_001037725_1_+_1  |
| Creb1         | 0.332   | -3.939 | 1.253  | 1.163  | -0.004 | 0.072  | 1.016  | 1.617  | 1.915  | 2.584  | 12912  | CREB1            | NM_001037726_1_+_1  |
| Arhgap25      | 4.092   | 4.337  | 5.457  | 5.373  | 5.701  | 5.475  | 5.470  | 5.485  | 6.166  | 5.605  | 232201 | ARHGAP25         | NM_001037727_6_-_1  |
| Arhgef10      | 5.495   | 5.229  | 3.458  | 3.666  | 2.437  | 2.633  | 3.305  | 3.580  | 2.768  | 3.147  | 234094 | ARHGEF10         | NM_001037736_8_+_1  |
| Arnt          | 2.356   | 1.252  | 3.064  | 2.915  | 3.535  | 3.097  | 2.946  | 2.936  | 4.905  | 4.759  | 11863  | ARNT             | NM_001037737_3_+_1  |
| Strip2        | 0.407   | -1.119 | 2.832  | 3.073  | -0.380 | 0.394  | 0.294  | -0.875 | -1.586 | -0.472 | 320609 | STRIP2           | NM_001037740_6_+_1  |
| Gpx4          | 2.943   | 2.946  | 1.330  | 0.728  | 1.731  | 1.652  | 2.098  | 1.564  | 2.442  | 1.609  | 625249 | GPX4             | NM_001037741_10_+_1 |
| Tyw5          | 2.727   | 2.591  | 2.124  | 2.306  | 1.270  | 1.748  | 1.311  | 2.033  | 0.794  | 1.648  | 68736  | TYW5             | NM_001037742_1_-_1  |
| Timm8a2       | -4.981  | -4.981 | -2.618 | -2.029 | -1.113 | -2.286 | -1.693 | -3.395 | -3.925 | -4.981 | 223262 | NA               | NM_001037744_14_+_1 |
| Zfp791        | -4.981  | -4.981 | 1.284  | 1.056  | -0.698 | -1.396 | -4.489 | -2.173 | -2.605 | -3.758 | 244556 | ZNF791           | NM_001037745_8_-_1  |
| Prps113       | 5.603   | 5.690  | 5.676  | 5.715  | 5.716  | 5.761  | 5.462  | 5.448  | 4.373  | 4.811  | 328099 | NA               | NM_001037746_12_+_1 |
| Card9         | 0.464   | 1.267  | 2.190  | 2.314  | 2.864  | 2.908  | 3.070  | 2.684  | 4.306  | 4.221  | 332579 | CARD9            | NM_001037747_2_-_1  |
| Baiap2        | 1.766   | 2.060  | 1.643  | 1.460  | 1.668  | 1.760  | 1.051  | 0.263  | 0.656  | 0.313  | 108100 | BAIAP2           | NM_001037754_11_+_1 |
| Baiap2        | 4.120   | 4.664  | 4.989  | 4.853  | 4.714  | 5.288  | 4.176  | 3.715  | 3.379  | 3.006  | 108100 | BAIAP2           | NM_001037755_11_+_1 |
| Brms1l        | 4.202   | 4.550  | 4.034  | 3.826  | 4.150  | 4.115  | 3.698  | 3.818  | 3.177  | 3.484  | 52592  | BRMS1L           | NM_001037756_12_+_1 |
| Wash1         | 1.744   | 3.060  | 0.322  | 1.328  | 1.743  | 1.364  | 0.564  | 1.508  | 1.992  | 1.723  | 68767  | WASH1            | NM_001037757_17_+_1 |
| Btrc          | 5.383   | 4.668  | 3.907  | 3.098  | 4.304  | 3.729  | 4.018  | 3.610  | 2.986  | 2.682  | 12234  | BTRC             | NM_001037758_19_+_1 |
| Sgk3          | 2.328   | 3.597  | 1.582  | 3.031  | 0.412  | 0.698  | 1.762  | 2.159  | -1.103 | 3.323  | 170755 | C8orf44-SGK3 SGK | NM_001037759_1_+_1  |
| Capzb         | 3.290   | 3.148  | 3.011  | 2.688  | 3.467  | 2.929  | 3.684  | 3.242  | 4.236  | 3.606  | 12345  | CAPZB            | NM_001037761_4_+_1  |
| Zdhhc12       | 3.827   | 4.173  | 3.721  | 3.770  | 3.369  | 3.526  | 3.371  | 3.256  | 3.656  | 3.431  | 66220  | ZDHHC12          | NM_001037762_2_-_1  |
| Rai1          | 5.297   | 5.136  | 2.924  | 2.727  | 2.500  | 2.412  | 2.502  | 1.745  | 0.814  | 1.581  | 19377  | RAI1             | NM_001037764_11_+_1 |
| Cd209b        | -4.981  | -4.981 | -3.833 | -4.319 | 0.071  | -0.172 | 1.753  | 1.244  | -1.516 | -2.630 | 69165  | NA               | NM_001037800_8_-_1  |
| Cd6           | -3.391  | -1.628 | -1.499 | -0.499 | -1.045 | 0.342  | 0.448  | 0.166  | -2.050 | -4.123 | 12511  | CD6              | NM_001037801_19_-_1 |
| Spn           | 3.326   | 3.088  | 0.347  | -0.578 | 0.876  | 0.229  | 2.471  | 2.894  | 2.875  | 2.738  | 20737  | SPN              | NM_001037810_7_-_1  |
| Tmem237       | 1.374   | 2.038  | 1.462  | 1.742  | 1.244  | 2.850  | 0.096  | 2.115  | 0.420  | 2.219  | 381259 | TMEM237          | NM_001037812_1_-_1  |
| Cklf          | 2.164   | 2.238  | 1.655  | 1.147  | 2.128  | 2.340  | 1.525  | 1.585  | 2.207  | 2.184  | 75458  | CKLF             | NM_001037841_8_+_1  |
| Cnot2         | 5.383   | 5.407  | 5.431  | 5.616  | 5.499  | 5.531  | 4.992  | 4.836  | 4.953  | 5.087  | 72068  | CNOT2            | NM_001037846_10_-_1 |
| Cnot2         | 5.202   | 4.893  | 4.790  | 4.605  | 4.581  | 4.300  | 4.621  | 4.938  | 4.699  | 4.638  | 72068  | CNOT2            | NM_001037847_10_-_1 |
| Cnot2         | -0.010  | -1.655 | -1.498 | -0.762 | -1.974 | -2.840 | -2.226 | -2.829 | -1.992 | -2.321 | 72068  | CNOT2            | NM_001037848_10_-_1 |
| Csf1r         | 4.415   | 2.108  | 5.558  | 5.156  | 7.237  | 6.934  | 9.710  | 10.082 | 11.604 | 11.960 | 12978  | CSF1R            | NM_001037859_18_+_1 |
| Atp11c        | 3.824   | 3.200  | 3.539  | 3.273  | 3.651  | 3.726  | 2.332  | 3.026  | 2.346  | 2.756  | 320940 | ATP11C           | NM_001037863_X_-_1  |
| Col28a1       | -4.981  | -4.981 | -4.962 | -4.592 | -4.969 | -4.945 | -4.371 | -4.966 | -4.981 | -1.467 | 213945 | COL28A1          | NM_001037865_6_-_1  |
| Tcf25         | 5.476   | 5.770  | 5.564  | 5.641  | 5.817  | 5.738  | 5.947  | 5.611  | 5.875  | 5.558  | 66855  | TCF25            | NM_001037877_8_+_1  |
| Tcf25         | 5.894   | 5.742  | 6.232  | 6.158  | 5.668  | 6.065  | 6.012  | 6.537  | 6.987  | 6.900  | 66855  | TCF25            | NM_001037878_8_+_1  |
| Dab2          | -4.455  | -4.981 | -0.435 | 0.388  | -4.360 | -2.865 | -1.463 | 0.288  | -4.696 | -2.671 | 13132  | DAB2             | NM_001037905_15_+_1 |
| C130026121Rik | -0.008  | 2.285  | -0.723 | 0.605  | -0.594 | -0.568 | -0.755 | -0.137 | -0.016 | -0.085 | 620078 | NA               | NM_001037909_1_-_1  |
|               | Ccdc107 | 6.666  | 6.574  | 6.487  | 6.384  | 5.380  | 5.788  | 5.391  | 5.315  | 3.553  | 622404 | CCDC107          | NM_001037913_4_+_1  |
| Ccdc17        | 3.382   | 3.514  | 2.353  | 2.742  | 2.788  | 2.880  | 2.315  | 2.151  | 1.479  | 1.233  | 622665 | CCDC17           | NM_001037916_4_+_1  |
| Gm6377        | 6.312   | 6.762  | 9.645  | 9.475  | 10.043 | 10.193 | 8.970  | 8.410  | 5.727  | 6.603  | 622976 | NA               | NM_001037917_X_+_1  |
| Lipt1         | 0.941   | 0.395  | 1.358  | 1.218  | 0.943  | 0.653  | -0.200 | 0.274  | -0.765 | -0.236 | 623661 | LIPT1            | NM_001037918_1_+_1  |
| Gm6460        | -4.981  | -4.981 | -4.972 | -4.972 | -4.598 | -4.380 | -3.362 | 0.172  | -4.981 | -4.981 | 623898 | NA               | NM_001037919_5_+_1  |
| Cks1brt       | -3.528  | -2.600 | -2.509 | -2.756 | -3.452 | -3.855 | -4.    |        |        |        |        |                  |                     |

|          |        |        |        |        |        |        |        |        |        |        |        |          |                     |
|----------|--------|--------|--------|--------|--------|--------|--------|--------|--------|--------|--------|----------|---------------------|
| BC147527 | 8.396  | 8.287  | 4.614  | 4.847  | 6.454  | 6.319  | 6.007  | 5.674  | 6.101  | 5.938  | 625360 | NA       | NM_001037925_13_+_1 |
| Zfp987   | -2.741 | 0.936  | -3.340 | -1.253 | -2.648 | -0.517 | -3.078 | -1.005 | -3.623 | 0.313  | 626316 | ZNF616   | NM_001037926_4_+_1  |
| Gm11992  | -0.683 | -1.201 | -3.901 | -3.617 | -3.908 | 0.956  | -2.416 | -1.731 | -4.981 | -3.853 | 626870 | C7orf57  | NM_001037928_11_+_1 |
| Deptor   | -3.219 | 0.019  | -2.354 | -2.702 | -4.530 | -4.925 | -2.269 | -4.700 | -1.600 | -0.284 | 97998  | DEPTOR   | NM_001037937_15_+_1 |
| Dhrs4    | 4.878  | 4.900  | 4.510  | 4.511  | 4.882  | 4.366  | 4.537  | 4.217  | 4.376  | 3.545  | 28200  | DHRS4    | NM_001037938_14_+_1 |
| Dnajb6   | 4.785  | 4.682  | 5.349  | 5.618  | 4.900  | 4.878  | 5.164  | 5.122  | 5.388  | 5.251  | 23950  | DNAJB6   | NM_001037940_5_+_1  |
| Dnajb6   | 2.475  | 2.903  | 1.841  | 1.927  | 1.929  | 2.141  | 1.770  | 1.352  | 1.269  | 1.054  | 23950  | DNAJB6   | NM_001037941_5_+_1  |
| Dusp22   | 3.860  | 3.948  | 3.764  | 3.991  | 4.902  | 5.009  | 4.953  | 5.148  | 6.433  | 6.376  | 105352 | DUSP22   | NM_001037955_13_+_1 |
| Dyrk1b   | -0.711 | 1.456  | 0.669  | -0.372 | 0.971  | -0.397 | 0.258  | -0.483 | 2.100  | 1.712  | 13549  | DYRK1B   | NM_001037957_7_+_1  |
| Edil3    | -3.993 | -4.981 | -4.978 | -4.924 | -4.981 | -4.981 | -4.975 | -4.978 | -2.397 | -1.511 | 13612  | EDIL3    | NM_001037987_13_+_1 |
| Fer      | 0.353  | -1.693 | -1.653 | 0.075  | 0.279  | 0.599  | 1.579  | 1.409  | -0.297 | 1.877  | 14158  | FER      | NM_001037997_17_+_1 |
| Dbi      | 0.635  | 0.399  | 0.090  | -0.393 | -1.049 | -1.294 | 0.253  | -0.015 | 0.623  | 0.665  | 13167  | DBI      | NM_001037999_1_-_1  |
| Kat2a    | 3.379  | 2.615  | 3.552  | 3.606  | 3.646  | 3.879  | 3.885  | 3.747  | 4.573  | 4.280  | 14534  | KAT2A    | NM_001038010_11_-_1 |
| Gnpda2   | 5.807  | 5.941  | 5.214  | 5.055  | 5.224  | 5.206  | 4.790  | 4.719  | 4.026  | 4.321  | 67980  | GNPDA2   | NM_001038015_5_-_1  |
| Grk6     | 5.766  | 5.792  | 4.709  | 4.926  | 5.353  | 5.102  | 5.766  | 5.781  | 8.144  | 7.765  | 26385  | GRK6     | NM_001038018_13_+_1 |
| Anapc11  | 5.931  | 5.556  | 6.042  | 5.448  | 6.178  | 5.761  | 5.760  | 5.348  | 5.356  | 5.038  | 66156  | ANAPC11  | NM_001038230_11_+_1 |
| Banf1    | 6.568  | 6.278  | 6.456  | 6.449  | 6.637  | 6.524  | 6.673  | 6.381  | 5.297  | 4.700  | 23825  | BANF1    | NM_001038231_19_-_1 |
| Ctsa     | 2.795  | 2.945  | 0.817  | 1.312  | 2.758  | 2.843  | 2.867  | 3.263  | 3.276  | 3.300  | 19025  | CTSA     | NM_001038492_2_+_1  |
| Arsi     | -3.668 | -2.437 | -1.130 | -1.901 | -4.027 | -3.940 | 0.967  | 2.021  | 3.035  | 3.386  | 545260 | ARSI     | NM_001038499_18_+_1 |
| Adar     | 1.900  | 1.331  | 0.721  | 1.175  | 2.329  | 2.410  | 2.000  | 0.195  | 0.947  | 1.568  | 56417  | ADAR     | NM_001038587_3_+_1  |
| Usp14    | 3.076  | 3.494  | 3.985  | 4.305  | 3.540  | 3.282  | 3.650  | 3.184  | 2.858  | 3.249  | 59025  | USP14    | NM_001038589_18_-_1 |
| Cldn19   | -4.981 | -4.981 | -4.714 | -2.657 | -4.980 | -4.964 | -4.975 | -4.873 | -4.981 | -4.981 | 242653 | CLDN19   | NM_001038590_4_+_1  |
| Glrx2    | 5.234  | 5.613  | 4.793  | 5.101  | 4.429  | 4.921  | 4.902  | 5.158  | 4.509  | 4.928  | 69367  | GLRX2    | NM_001038592_1_+_1  |
| Glrx2    | -1.944 | -0.621 | -3.571 | -4.771 | -4.791 | -3.546 | -0.732 | -1.444 | -4.651 | -1.626 | 69367  | GLRX2    | NM_001038593_1_+_1  |
| Glrx2    | -0.933 | -0.907 | -2.908 | -2.224 | -4.867 | -4.110 | -1.874 | -3.685 | -4.535 | -4.831 | 69367  | GLRX2    | NM_001038594_1_+_1  |
| Marveld2 | 1.199  | -4.981 | 3.318  | 2.317  | 1.172  | -0.118 | 0.807  | -1.256 | -4.981 | -4.981 | 218518 | MARVELD2 | NM_001038602_13_-_1 |
| Clec5a   | -3.044 | -4.981 | -1.005 | -1.162 | -1.079 | -1.710 | 1.865  | 2.504  | 3.682  | 4.544  | 23845  | CLEC5A   | NM_001038604_6_-_1  |
| Txn14a   | 7.150  | 6.867  | 7.340  | 7.120  | 7.176  | 7.024  | 7.086  | 7.108  | 7.082  | 7.034  | 27366  | TXNL4A   | NM_001038608_18_+_1 |
| Dach1    | -4.981 | -4.981 | -4.968 | -2.382 | -4.972 | -2.418 | -4.926 | -2.213 | -0.714 | -0.353 | 13134  | DACH1    | NM_001038610_14_-_1 |
| Olfm1    | -4.250 | -4.864 | 2.513  | 3.550  | -1.041 | -0.987 | 3.013  | 3.585  | 3.336  | 3.394  | 56177  | OLFM1    | NM_001038612_2_+_1  |
| Olfm1    | -0.517 | -0.539 | 5.929  | 2.683  | -0.506 | -0.223 | 1.720  | 2.183  | 0.637  | 2.473  | 56177  | OLFM1    | NM_001038613_2_+_1  |
| Olfm1    | -0.570 | -1.563 | 5.108  | 0.838  | -4.498 | -4.468 | -1.578 | -0.240 | -4.476 | -4.637 | 56177  | OLFM1    | NM_001038614_2_+_1  |
| Dnm3     | -4.981 | -4.981 | -4.981 | -4.981 | -4.981 | -4.981 | -3.506 | -0.840 | -4.981 | -4.981 | 103967 | DNM3     | NM_001038619_1_-_1  |
| Rabgap1l | 5.721  | 6.164  | 3.013  | 3.144  | 2.367  | 3.041  | 2.533  | 3.189  | 4.815  | 4.981  | 29809  | RABGAP1L | NM_001038621_1_-_1  |
| Ric3     | -4.981 | -1.569 | -3.438 | -3.165 | -3.004 | -4.027 | -4.015 | -3.421 | -0.676 | -4.981 | 320360 | RIC3     | NM_001038624_7_-_1  |
| Sertad2  | 4.583  | 4.871  | 3.795  | 3.960  | 4.087  | 4.105  | 4.236  | 3.846  | 3.827  | 3.878  | 58172  | SERTAD2  | NM_001038625_11_+_1 |
| Smurf1   | 3.652  | 3.397  | 4.095  | 4.193  | 4.338  | 4.179  | 4.307  | 3.941  | 4.246  | 3.878  | 75788  | SMURF1   | NM_001038627_5_-_1  |
| Stk35    | 0.568  | 1.111  | 1.247  | 1.084  | 0.123  | 0.571  | 1.160  | 2.275  | 2.130  | 2.677  | 67333  | STK35    | NM_001038635_2_+_1  |
| Gng2     | 7.275  | 7.270  | 6.811  | 6.685  | 6.133  | 6.218  | 6.210  | 6.048  | 6.134  | 6.345  | 14702  | GNG2     | NM_001038637_14_-_1 |
| Slx4ip   | -2.608 | 0.511  | 0.288  | 0.857  | -0.945 | 0.784  | 0.555  | 0.069  | -1.628 | 1.498  | 74243  | SLX4IP   | NM_001038641_2_+_1  |
| Ets1     | 3.286  | 4.223  | -1.274 | -1.202 | -0.574 | 0.401  | 0.780  | 2.257  | 0.639  | -0.623 | 23871  | ETS1     | NM_001038642_9_+_1  |
| Slc3a1   | 3.756  | 5.069  | 6.213  | 5.597  | 0.115  | 2.619  | 2.291  | 3.675  | 3.516  | 3.376  | 108116 | SLC3A1   | NM_001038643_7_-_1  |
| Zfp953   | 2.201  | 2.163  | 2.656  | 1.544  | 2.332  | 2.175  | 2.573  | 1.938  | 1.923  | 2.636  | 629016 | NA       | NM_001038651_13_-_1 |
| Slc16a3  | -2.406 | -1.164 | -0.882 | -0.794 | 0.808  | -0.041 | 3.086  | 2.076  | 4.530  | 3.655  | 80879  | SLC16A3  | NM_001038653_11_+_1 |
| Slc16a3  | -2.539 | -2.347 | -0.604 | -1.540 | -1.078 | -1.880 | -0.237 | -0.327 | 3.148  | 2.160  | 80879  | SLC16A3  | NM_001038654_11_+_1 |
| Gng7     | -4.412 | -3.903 | -4.916 | -4.377 | -4.270 | -4.773 | -4.107 | -4.830 | -4.644 | -4.289 | 14708  | GNG7     | NM_001038655_10_-_1 |
| Mapk1    | 6.165  | 6.162  | 5.857  | 6.087  | 5.843  | 6.244  | 5.638  | 5.540  | 5.266  | 5.020  | 26413  | MAPK1    | NM_001038663_16_+_1 |
| Gngt2    | -0.563 | -1.417 | -1.184 | -0.588 | 0.991  | 0.244  | 3.251  | 2.094  | 2.445  | 2.125  | 14710  | GNGT2    | NM_001038664_11_+_1 |
| Kdm3a    | 3.015  | 4.065  | 4.426  | 3.399  | 3.341  | 2.972  | 4.003  | 3.181  | 4.667  | 4.923  | 104263 | KDM3A    | NM_001038695_6_-_1  |
| Rnpc3    | 3.166  | 2.520  | 3.133  | 2.674  | 2.617  | 2.630  | 2.495  | 2.779  | 2.260  | 3.330  | 67225  | RNPC3    | NM_001038696_3_-_1  |
| Elavl4   | -4.981 | -4.981 | -4.892 | -4.934 | -1.658 | -2.794 | -4.673 | -4.002 | -4.981 | -4.981 | 15572  | ELAVL4   | NM_001038698_4_-_1  |
| Fn3k     | -4.981 | -1.163 | -4.927 | -1.106 | -3.628 | -2.450 | -4.916 | -3.973 | -2.659 | -4.981 | 63828  | FN3K     | NM_001038699_11_+_1 |
| Fnbp1    | 5.053  | 4.999  | 8.374  | 8.319  | 6.089  | 6.006  | 6.217  | 6.357  | 6.056  | 5.777  | 14269  | FBNP1    | NM_001038700_2_-_1  |
| Gpr146   | 1.440  | 1.334  | -0.158 | -0.648 | -1.297 | -0.618 | -1.405 | 0.915  | -2.014 | 1.349  | 80290  | GPR146   | NM_001038703_5_+_1  |
| Cdc42se1 | 7.450  | 7.328  | 7.567  | 7.493  | 7.368  | 7.177  | 7.422  | 7.466  | 8.316  | 8.180  | 57912  | CDC42SE1 | NM_001038708_3_+_1  |
| Tmod2    | -3.761 | -4.981 | -2.485 | -3.218 | -2.546 | -1.861 | -4.090 | -3.556 | -4.981 | -4.981 | 50876  | TMOD2    | NM_001038710_9_-_1  |
| P2rx7    | 4.214  | 2.984  | 2.980  | 1.636  | 2.004  | 1.823  | 3.090  | 0.278  | 3.737  | 0.890  | 18439  | P2RX7    | NM_001038839_5_+_1  |
| P2rx7    | -0.568 | 0.061  | -0.742 | -0.221 | -0.932 | 0.618  | 0.267  | 1.228  | -4.074 | 1.185  | 18439  | P2RX7    | NM_001038845_5_+_1  |
| Rcsd1    | 4.325  | 5.096  | 3.799  | 3.734  | 3.437  | 2.426  | 3.243  | 4.236  | 4.871  | 4.483  | 226594 | RCSO1    | NM_001038846_1_-_1  |
| P2rx7    | 3.301  | 3.484  | 1.711  | 1.887  | 0.597  | 1.375  | 1.072  | 1.038  | 1.101  | 1.157  | 18439  | P2RX7    | NM_001038887_5_+_1  |
| Rnf38    | 3.633  | 3.622  | 4.326  | 3.604  | 4.618  | 3.674  | 5.099  | 4.313  | 5.760  | 5.401  | 73469  | RNF38    | NM_001038993_4_-_1  |
| Gm4787   | -0.059 | -0.688 | -1.701 | -1.831 | -1.838 | -1.384 | -2.742 | -1.534 | -0.868 | -2.035 | 214321 | NA       | NM_001038995_12_-_1 |
| Svbp     | 2.990  | 3.486  | -0.072 | -0.969 | -0.219 | -0.653 | -1.086 | -0.700 | -0.218 | -0.521 | 69216  | SVBP     | NM_001038998_4_+_1  |
| Atp8a1   | -0.627 | 1.203  | -0.327 | 1.379  | 1.369  | 1.017  | 1.726  | -0.940 | 0.885  | 0.990  | 11980  | ATP8A1   | NM_001038999_5_-_1  |
| Kif5a    | 2.834  | 2.649  | 3.583  | 3.245  | 0.657  | -0.233 | -0.156 | -0.399 | -1.346 | -0.305 | 16572  | KIF5A    | NM_001039000_10_-_1 |
| Nhlrc4   | -4.981 | -2.353 | -4.898 | -2.923 | -4.605 | -3.693 | -4.958 | -4.779 | -4.394 | -4.227 | 621239 | NHLRC4   | NM_001039038_17_-_1 |
| Kctd21   | 1.403  | 1.408  | 2.093  | 2.046  | 1.357  | 1.469  | 2.465  | 2.336  | 3.512  | 3.930  | 622320 | KCTD21   | NM_001039039_7_+_1  |
| Pigc     | 4.549  | 4.761  | 3.991  | 3.946  | 4.264  | 4.500  | 4.161  | 4.183  | 4.922  | 4.763  | 67292  | PIGC     | NM_001039045_1_+_1  |
| Trim58   | -4.981 | -3.408 | -4.975 | -2.181 | -4.000 | -2.838 | -4.952 | -2.324 | -3.531 | -2.867 | 216781 | TRIM58   | NM_001039047_11_+_1 |
| Pkib     | -1.010 | -3.477 | -0.481 | -0.988 | -1.030 | -0.553 | -2.836 | -4.966 | -4.333 | -4.597 | 18768  | PKIB     | NM_001039050_10_+_1 |
| Pkib     | 7.573  | 8.033  | 8.168  | 8.097  | 7.081  | 7.365  | 6.206  | 5.713  | 4.187  | 3.311  | 18768  | PKIB     | NM_001039051_10_+_1 |
| Pkib     | 0.356  | -0.684 | 0.225  | -2.799 | -3.203 | -4.874 | -4.373 | -4.808 | 2.792  | 3.727  | 18768  | PKIB     | NM_001039052_10_+_1 |
| Pkib     | 0.474  | -3.642 | -1.343 | -2.133 | -2.309 | -2.641 | -4.389 | -3.929 | 1.028  | 1.920  | 18768  | PKIB     | NM_001039053_10_+_1 |
| Klhl15   | -4.908 | -4.736 | -3.702 | -2.809 | -4.414 | -4.858 | -3.080 | -3.846 | -4.942 | -4.893 | 236904 | KLHL15   | NM_001039059_X_+_1  |

|          |        |        |        |        |        |        |        |        |        |        |        |          |                        |
|----------|--------|--------|--------|--------|--------|--------|--------|--------|--------|--------|--------|----------|------------------------|
| Klh15    | 1.473  | 1.518  | 0.126  | 0.668  | 1.065  | 1.697  | 1.290  | 0.293  | 1.071  | 0.386  | 236904 | KLHL15   | NM_001039060_X_+1      |
| Klh15    | 1.273  | 1.198  | -0.590 | 0.367  | 1.257  | 0.762  | 0.360  | 0.693  | 1.276  | 0.546  | 236904 | KLHL15   | NM_001039061_X_+1      |
| Prosc    | 0.761  | 1.370  | 2.781  | 2.181  | 2.397  | 2.333  | 2.410  | 2.146  | 1.604  | 1.868  | 114863 | PROSC    | NM_001039077_8_+1      |
| Prosc    | -2.241 | -0.034 | -0.220 | -0.431 | -0.311 | -2.163 | -1.717 | -1.659 | 0.567  | -0.357 | 114863 | PROSC    | NM_001039078_8_+1      |
| Prkc2    | 0.614  | 1.201  | -0.404 | 0.114  | -0.328 | -3.305 | 0.651  | -4.391 | 0.711  | 0.997  | 18762  | PRKC2    | NM_001039079_4_-1      |
| Rbms2    | -4.337 | -3.892 | -4.440 | -2.281 | -4.773 | -4.876 | -4.575 | -4.842 | -4.419 | -4.722 | 56516  | RBMS2    | NM_001039080_10_-1     |
| Mier1    | 4.565  | 4.567  | 4.795  | 4.353  | 4.381  | 4.604  | 4.864  | 4.713  | 5.037  | 5.380  | 71148  | MIER1    | NM_001039081_4_+1      |
| Mrpl1    | 3.440  | 3.636  | 2.987  | 2.898  | 2.937  | 2.974  | 3.059  | 2.667  | 2.359  | 2.762  | 94061  | MRPL1    | NM_001039084_5_+1      |
| Rapgef1  | 3.091  | 3.655  | 2.675  | 2.718  | 3.914  | 3.617  | 2.703  | 2.177  | 2.913  | 2.758  | 107746 | RAPGEF1  | NM_001039086_2_+1      |
| Rapgef1  | -4.238 | -1.039 | -4.402 | -4.798 | -3.576 | -4.802 | -4.300 | -4.913 | -4.608 | -1.182 | 107746 | RAPGEF1  | NM_001039087_2_+1      |
| Seh1l    | 6.117  | 6.045  | 6.287  | 6.114  | 5.995  | 5.719  | 6.074  | 5.824  | 6.014  | 5.774  | 72124  | SEH1L    | NM_001039088_18_+1     |
| Sel1l    | 6.016  | 5.874  | 6.775  | 7.032  | 6.717  | 6.577  | 6.880  | 6.963  | 6.889  | 7.019  | 20338  | SEL1L    | NM_001039089_12_-1     |
| Skil     | 5.586  | 5.191  | 5.297  | 5.201  | 5.021  | 4.981  | 5.398  | 4.770  | 4.685  | 5.479  | 20482  | SKIL     | NM_001039090_3_+1      |
| Tom1l2   | 2.438  | 3.006  | 1.243  | 1.496  | 1.732  | 2.228  | 1.366  | 1.598  | 0.502  | 2.933  | 216810 | TOM1L2   | NM_001039092_11_-1     |
| Tom1l2   | 3.634  | 3.348  | 2.007  | 2.066  | 2.264  | 2.198  | 1.676  | 1.659  | 2.836  | 2.869  | 216810 | TOM1L2   | NM_001039093_11_-1     |
| Negr1    | -1.512 | -4.981 | -4.981 | -4.981 | -4.382 | -4.783 | -4.935 | -4.958 | -4.981 | -4.981 | 320840 | NEGR1    | NM_001039094_3_+1      |
| Rasa4    | -3.675 | -1.620 | 0.290  | -1.636 | 1.654  | 0.272  | 1.189  | 1.775  | -0.181 | 0.836  | 54153  | RASA4    | NM_001039103_5_+1      |
| Kcnrg    | -2.465 | -2.197 | -2.974 | -3.035 | -4.164 | -4.057 | -2.264 | -2.561 | -1.596 | -1.693 | 328424 | KCNRG    | NM_001039105_14_+1     |
| Ddhd1    | 1.346  | 1.169  | 3.521  | 3.185  | 4.817  | 4.294  | 4.019  | 2.718  | 3.832  | 4.067  | 114874 | DDHD1    | NM_001039106_14_-1     |
| Zkscan4  | -2.590 | -0.307 | -2.261 | 1.728  | -2.965 | -0.670 | -1.335 | 1.812  | -0.586 | 2.784  | 544922 | NA       | NM_001039115_13_+1     |
| Defb25   | -4.981 | -2.997 | -2.347 | -2.752 | -0.764 | -1.318 | -0.475 | -2.158 | -2.834 | -3.209 | 654459 | NA       | NM_001039122_2_-1      |
| Asb1     | -0.197 | 2.344  | 1.034  | 2.049  | 1.882  | 1.172  | 1.292  | 2.018  | 2.679  | 2.026  | 65247  | ASB1     | NM_001039126_1_+1      |
| Hnrnpa1  | 2.743  | 3.579  | 2.863  | 4.121  | 2.951  | 3.864  | 2.597  | 3.603  | 1.924  | 2.683  | 15382  | NA       | NM_001039129_15_+1     |
| Scoc     | 4.573  | 1.624  | 3.826  | 2.062  | 2.603  | 0.958  | 3.046  | 1.203  | 1.665  | 0.306  | 56367  | SCOC     | NM_001039137_8_-1      |
| Camk2g   | -0.494 | 1.173  | 0.630  | 0.740  | 1.272  | -0.207 | 1.548  | 1.192  | 1.294  | -1.083 | 12325  | CAMK2G   | NM_001039138_14_-1     |
| Camk2g   | 2.970  | 2.559  | 2.128  | 2.243  | 2.196  | 2.518  | 1.408  | 0.786  | 0.976  | 2.186  | 12325  | CAMK2G   | NM_001039139_14_-1     |
| Morf4l1  | 4.454  | 4.089  | 3.604  | 3.599  | 3.526  | 3.391  | 3.595  | 3.104  | 3.323  | 3.193  | 21761  | MORF4L1  | NM_001039147_9_-1      |
| Cd226    | -2.347 | -2.239 | -3.916 | -2.189 | -3.671 | -4.916 | -1.973 | -4.148 | -1.586 | -2.620 | 225825 | CD226    | NM_001039149_18_+1     |
| Cd44     | 0.282  | -3.470 | -1.141 | -0.949 | -0.548 | -4.188 | -4.225 | -1.093 | -3.557 | -3.783 | 12505  | CD44     | NM_001039150_2_-1      |
| Cd44     | 8.554  | 7.784  | 7.950  | 7.163  | 6.357  | 5.722  | 7.909  | 7.917  | 9.309  | 9.315  | 12505  | CD44     | NM_001039151_2_-1      |
| Tctn1    | 3.343  | 2.858  | 0.984  | 0.725  | 0.531  | 1.263  | 1.346  | 1.017  | 1.167  | 1.033  | 654470 | TCTN1    | NM_001039153_5_-1      |
| Triobp   | -4.981 | -4.981 | -4.509 | -4.966 | -4.963 | -4.800 | -4.967 | -4.974 | -4.981 | -4.981 | 110253 | TRIOBP   | NM_001039155_15_+1     |
| Triobp   | -3.891 | -3.891 | -4.363 | -4.049 | -4.600 | -4.902 | -4.543 | -4.922 | -3.843 | -4.392 | 110253 | TRIOBP   | NM_001039156_15_+1     |
| Ube2j2   | 3.044  | 2.246  | 1.816  | 1.918  | 1.643  | 1.208  | 1.760  | 1.306  | 1.631  | 1.717  | 140499 | UBE2J2   | NM_001039157_4_+1      |
| Ube2j2   | 3.379  | 3.366  | 3.700  | 3.360  | 3.457  | 2.804  | 3.652  | 2.769  | 3.311  | 2.750  | 140499 | UBE2J2   | NM_001039158_4_+1      |
| Ube2j2   | 2.654  | 1.990  | 2.762  | 1.673  | 2.669  | 1.355  | 2.186  | 0.314  | 1.935  | -0.074 | 140499 | UBE2J2   | NM_001039159_4_+1      |
| Gvin1    | 4.249  | 3.916  | 3.992  | 3.421  | 4.494  | 3.667  | 5.735  | 5.123  | 6.326  | 5.837  | 74558  | NA       | NM_001039160_7_-1      |
| Gvin1    | 4.382  | 1.516  | 4.281  | -0.335 | 4.436  | 0.892  | 5.107  | 2.561  | 6.008  | 3.860  | 74558  | NA       | NM_001039160_dup1_7_-2 |
| Clip2    | -1.143 | -0.827 | 1.581  | 1.886  | 0.582  | 0.607  | 0.931  | 0.161  | 0.631  | 1.206  | 269713 | CLIP2    | NM_001039162_5_-1      |
| Eif4e2   | 4.385  | 4.532  | 4.258  | 4.710  | 4.452  | 4.575  | 4.263  | 4.656  | 4.002  | 4.571  | 26987  | EIF4E2   | NM_001039169_1_+1      |
| Eif4e2   | 5.939  | 5.854  | 6.189  | 6.170  | 5.963  | 5.844  | 5.716  | 5.638  | 5.229  | 5.005  | 26987  | EIF4E2   | NM_001039170_1_+1      |
| Dok6     | -4.981 | -4.981 | -4.981 | -4.981 | -4.975 | -4.888 | -4.980 | -4.489 | -3.925 | -2.753 | 623279 | DOK6     | NM_001039173_18_-1     |
| Elov1l   | -1.400 | 0.639  | -1.456 | -0.553 | -2.860 | -1.226 | -3.045 | -1.887 | -1.738 | -0.951 | 54325  | ELOVL1   | NM_001039175_4_+1      |
| Elov1l   | 0.206  | 0.100  | 1.602  | 2.653  | 1.794  | 1.269  | 0.872  | 1.267  | 2.460  | 3.198  | 54325  | ELOVL1   | NM_001039176_4_+1      |
| Bicd2    | 0.821  | 0.458  | 1.933  | 2.143  | 2.067  | 1.286  | 1.390  | 1.549  | 2.876  | 3.059  | 76895  | BICD2    | NM_001039179_13_+1     |
| Bicd2    | 3.424  | 3.615  | 3.456  | 3.725  | 2.928  | 2.959  | 3.809  | 2.945  | 2.899  | 3.723  | 76895  | BICD2    | NM_001039180_13_+1     |
| Cep350   | 5.134  | 5.074  | 6.417  | 5.528  | 6.207  | 5.806  | 5.897  | 5.329  | 5.756  | 5.587  | 74081  | CEP350   | NM_001039184_1_-1      |
| Ceacam1  | 6.112  | 3.325  | 1.977  | -0.822 | 2.947  | 0.020  | 6.042  | 4.382  | 7.762  | 5.911  | 26365  | CEACAM1  | NM_001039185_7_-1      |
| Ceacam1  | 5.999  | 3.265  | 1.506  | -0.647 | 2.608  | 0.147  | 6.083  | 5.347  | 8.120  | 7.128  | 26365  | CEACAM1  | NM_001039186_7_-1      |
| Ceacam1  | 4.013  | 2.174  | -0.170 | -2.621 | 0.197  | -3.120 | 2.595  | 3.074  | 5.504  | 5.375  | 26365  | CEACAM1  | NM_001039187_7_-1      |
| Rreb1    | -1.004 | -3.159 | -3.081 | -2.482 | -3.345 | -4.144 | -1.693 | -4.838 | -4.607 | -0.408 | 68750  | RREB1    | NM_001039188_13_+1     |
| Fars2    | -4.981 | -1.102 | -2.015 | -2.263 | -4.013 | -2.883 | -2.186 | -2.824 | -0.909 | -3.108 | 69955  | FARS2    | NM_001039189_13_+1     |
| Gmfg     | 7.581  | 7.095  | 6.528  | 6.322  | 7.823  | 7.761  | 8.200  | 7.812  | 7.731  | 7.283  | 63986  | GMFG     | NM_001039192_7_+1      |
| Aifm2    | -1.987 | 0.471  | 0.719  | 1.009  | 1.211  | 2.416  | 1.916  | 1.918  | 4.419  | 4.009  | 71361  | AIFM2    | NM_001039194_10_+1     |
| Zfhx2    | 0.872  | 0.967  | 1.137  | 1.142  | 0.462  | 1.079  | 0.722  | 0.974  | 0.761  | 1.279  | 239102 | ZFHX2    | NM_001039198_14_-1     |
| Emc1     | 4.250  | 4.305  | 4.075  | 4.240  | 4.423  | 4.350  | 4.889  | 4.898  | 5.921  | 5.936  | 230866 | EMC1     | NM_001039200_4_+1      |
| Hdhd2    | -0.338 | 0.995  | 0.523  | -0.201 | -0.197 | -0.772 | -0.666 | 0.525  | 0.033  | 1.079  | 76987  | HDHD2    | NM_001039201_18_+1     |
| Hdhd2    | -1.577 | 0.164  | -1.953 | -3.298 | -2.513 | -3.420 | -1.889 | -1.816 | -2.010 | -2.198 | 76987  | HDHD2    | NM_001039202_18_+1     |
| Zfp982   | -2.544 | -1.428 | -4.147 | -2.301 | -3.193 | -1.392 | -2.004 | -1.752 | -4.039 | -2.327 | 195531 | NA       | NM_001039209_4_+1      |
| Mex3c    | 4.504  | 3.707  | 4.639  | 4.231  | 4.008  | 3.959  | 4.071  | 4.277  | 4.736  | 4.915  | 240396 | MEX3C    | NM_001039214_18_+1     |
| Gm6086   | -3.668 | -4.981 | -3.489 | -3.095 | -3.389 | -3.837 | -4.210 | -4.945 | -4.981 | -3.882 | 619597 | GAL3ST2  | NM_001039219_1_+1      |
| Al429214 | 0.754  | 3.034  | -0.500 | 1.333  | 1.850  | 3.556  | 1.293  | 2.473  | -0.733 | 1.746  | 621080 | C8orf48  | NM_001039220_8_+1      |
| Gm14137  | -0.613 | 0.477  | -1.256 | -2.019 | -1.605 | -2.399 | -1.867 | -1.559 | -0.419 | -1.838 | 623781 | C15orf62 | NM_001039223_2_+1      |
| Gm6583   | -3.668 | -3.315 | -1.493 | -1.775 | -3.250 | -4.522 | -4.324 | -3.596 | -1.540 | -1.734 | 625424 | NA       | NM_001039228_5_-1      |
| Zfp951   | 2.355  | 0.105  | 3.280  | 1.163  | 2.774  | 1.176  | 3.029  | -0.037 | 2.513  | 0.841  | 626391 | NA       | NM_001039231_5_-1      |
| Zfp808   | 2.813  | 2.711  | 1.717  | 1.205  | 2.578  | 2.959  | 2.164  | 1.544  | 0.029  | 1.612  | 630579 | NA       | NM_001039239_13_+1     |
| Tmem267  | 2.122  | 2.441  | 1.331  | 1.467  | -0.181 | 0.515  | 0.317  | 0.660  | 0.779  | 0.867  | 633640 | TMEM267  | NM_001039244_13_+1     |
| Kcnd3    | -4.981 | -4.981 | -4.370 | -4.153 | -2.576 | -4.717 | -2.997 | -4.953 | -4.981 | -4.981 | 56543  | KCND3    | NM_001039347_3_+1      |
| Nolc1    | 4.542  | 4.393  | 4.529  | 4.491  | 4.560  | 4.622  | 4.311  | 4.347  | 3.487  | 3.387  | 70769  | NA       | NM_001039351_19_+1     |
| Nolc1    | 2.274  | 1.108  | 2.587  | 0.687  | 1.664  | 2.216  | 1.916  | 0.945  | 1.966  | -0.006 | 70769  | NA       | NM_001039352_19_+1     |
| Nolc1    | 4.005  | 4.370  | 4.145  | 4.420  | 4.499  | 4.344  | 4.298  | 4.270  | 3.913  | 3.405  | 70769  | NA       | NM_001039353_19_+1     |
| Lin7a    | -4.981 | -4.981 | -4.896 | -4.919 | -4.978 | -4.975 | -4.831 | -4.937 | -3.817 | -4.981 | 108030 | LIN7A    | NM_001039354_10_+1     |
| Hmga1    | 2.289  | 1.863  | 1.044  | 1.700  | 1.496  | 1.454  | 2.497  | 1.111  | 2.183  | 1.399  | 15361  | HMGA1    | NM_001039356_17_+1     |
| Tsc2     | 2.487  | 2.391  | 3.019  | 2.254  | 2.329  | 1.875  | 1.928  | 3.070  | 3.953  | 3.199  | 22084  | TSC2     | NM_001039363_17_-1     |

|               |        |        |        |        |        |        |        |        |        |        |        |          |                    |
|---------------|--------|--------|--------|--------|--------|--------|--------|--------|--------|--------|--------|----------|--------------------|
| Polr2k        | 3.790  | 3.382  | 2.742  | 2.172  | 2.257  | 1.820  | 3.236  | 2.140  | 2.232  | 1.330  | 17749  | POLR2K   | NM_001039368_15_+1 |
| Slc22a15      | -0.072 | 2.127  | 2.301  | 2.515  | 1.230  | 1.525  | 2.244  | 2.131  | 3.763  | 3.654  | 242126 | SLC22A15 | NM_001039371_3_-1  |
| Mtctp1        | 1.421  | 0.289  | 0.724  | 0.249  | 0.842  | 0.666  | 0.688  | 0.454  | 0.714  | 1.305  | 17763  | CMC4     | NM_001039373_X_-1  |
| Pde4dip       | -3.238 | -3.991 | -2.831 | -2.726 | 1.190  | -0.353 | -1.409 | -1.075 | -4.124 | -4.196 | 83679  | PDE4DIP  | NM_001039376_3_-1  |
| Vgf           | -3.668 | -4.981 | -4.987 | -4.190 | -4.221 | -4.417 | -4.804 | -4.846 | -4.981 | -4.981 | 381677 | VGf      | NM_001039385_5_+1  |
| Nsmf          | 0.677  | 1.364  | 1.218  | 0.406  | -0.224 | 0.575  | -2.009 | -0.926 | 1.945  | 1.406  | 56876  | NSMF     | NM_001039386_2_+1  |
| Nsmf          | 2.037  | 1.064  | 1.216  | 1.764  | 1.153  | 0.091  | -0.195 | 1.402  | 3.114  | 3.020  | 56876  | NSMF     | NM_001039387_2_+1  |
| Wdr37         | 0.835  | -0.321 | -2.802 | 0.549  | -0.213 | -1.703 | -3.559 | -1.814 | 0.130  | -1.207 | 207615 | WDR37    | NM_001039388_13_-1 |
| Wdr37         | 3.628  | 3.699  | 3.364  | 2.409  | 3.022  | 2.151  | 3.086  | 2.719  | 3.511  | 3.410  | 207615 | WDR37    | NM_001039389_13_-1 |
| Pkig          | 6.599  | 6.369  | 1.695  | 2.001  | 2.027  | 2.682  | 3.053  | 3.793  | 2.920  | 2.955  | 18769  | PKIG     | NM_001039390_2_+1  |
| Pkig          | 7.293  | 7.354  | 3.796  | 3.990  | 4.085  | 4.134  | 4.785  | 4.974  | 4.765  | 4.594  | 18769  | PKIG     | NM_001039391_2_+1  |
| Tmsb10        | 1.615  | 1.934  | 3.129  | 2.943  | 2.421  | 2.280  | 2.898  | 2.518  | 4.194  | 3.448  | 19240  | NA       | NM_001039392_6_-1  |
| Rab43         | 4.730  | 4.679  | 8.844  | 8.787  | 7.432  | 7.340  | 7.578  | 7.381  | 6.870  | 6.708  | 69834  | RAB43    | NM_001039394_6_-1  |
| Trim46        | 0.716  | -0.302 | -1.952 | -3.000 | -1.999 | -2.675 | -2.195 | -2.923 | -1.258 | -3.497 | 360213 | TRIM46   | NM_001039466_3_-1  |
| Kif21b        | 4.560  | 4.418  | 5.121  | 4.711  | 5.240  | 4.794  | 5.172  | 4.860  | 5.524  | 4.638  | 16565  | KIF21B   | NM_001039472_1_+1  |
| Tcerg1        | 4.890  | 5.022  | 5.311  | 5.229  | 5.337  | 5.190  | 5.258  | 5.036  | 4.657  | 4.596  | 56070  | TCERG1   | NM_001039474_18_+1 |
| Lrif1         | 3.956  | 3.072  | 2.532  | 2.476  | 1.556  | 1.855  | 2.244  | 1.396  | -0.981 | 2.122  | 321000 | LRIF1    | NM_001039478_3_+1  |
| Klhl20        | 2.860  | 2.830  | 3.746  | 3.368  | 3.536  | 3.528  | 3.786  | 4.043  | 4.415  | 4.799  | 226541 | KLHL20   | NM_001039482_1_-1  |
| Tmco1         | 8.061  | 8.023  | 6.504  | 6.578  | 6.644  | 6.764  | 7.069  | 6.924  | 6.458  | 6.785  | 68944  | TMCO1    | NM_001039483_1_+1  |
| Kcnj10        | 0.884  | 0.173  | 0.323  | 0.322  | 0.387  | 0.424  | 0.731  | 2.881  | -0.633 | -0.122 | 16513  | KCNJ10   | NM_001039484_1_+1  |
| Lrif1         | 2.838  | 3.133  | 4.034  | 3.768  | 3.101  | 3.105  | 2.659  | 3.052  | 2.825  | 3.842  | 321000 | LRIF1    | NM_001039488_3_+1  |
| Plekhn3       | 7.121  | 7.382  | 6.679  | 6.546  | 7.214  | 6.939  | 6.495  | 6.251  | 6.779  | 6.581  | 241075 | PLEKHM3  | NM_001039493_1_-1  |
| Tex40         | -4.981 | -4.981 | -4.828 | -4.528 | -4.978 | -4.978 | -4.968 | -4.210 | -4.981 | -3.131 | 67077  | TEX40    | NM_001039494_19_-1 |
| Lipe          | 2.352  | 2.740  | 3.892  | 4.299  | 4.358  | 5.017  | 3.803  | 3.996  | 4.685  | 4.545  | 16890  | LIPE     | NM_001039507_7_-1  |
| Pnkd          | -2.279 | -2.891 | -0.881 | -2.758 | -0.013 | 0.527  | -0.865 | -0.806 | 0.604  | -0.784 | 56695  | PNKD     | NM_001039509_1_+1  |
| Adora1        | -4.981 | -4.981 | -4.875 | -4.972 | -4.942 | -4.969 | -4.938 | -4.972 | -4.711 | -4.924 | 11539  | ADORA1   | NM_001039510_1_-1  |
| Ivns1abp      | 5.808  | 4.791  | 6.852  | 6.498  | 5.977  | 6.044  | 5.210  | 5.535  | 4.915  | 5.250  | 117198 | IVNS1ABP | NM_001039511_1_+1  |
| Ivns1abp      | 3.878  | 2.991  | 3.934  | 2.939  | 3.650  | 2.772  | 3.433  | 2.977  | -1.516 | 0.120  | 117198 | IVNS1ABP | NM_001039512_1_+1  |
| Dhps          | 5.557  | 5.845  | 5.081  | 5.263  | 4.990  | 5.139  | 4.928  | 5.006  | 4.296  | 4.462  | 330817 | DHPS     | NM_001039514_8_+1  |
| Arl4a         | 5.642  | 5.631  | 3.769  | 3.736  | 3.270  | 3.696  | 2.587  | 2.854  | 2.368  | 2.513  | 11861  | ARL4A    | NM_001039515_12_-1 |
| Gtf2a2        | 7.530  | 7.458  | 7.150  | 6.771  | 7.126  | 7.144  | 7.057  | 6.736  | 5.696  | 5.690  | 235459 | GTF2A2   | NM_001039519_9_+1  |
| Dnm2          | 3.492  | 3.496  | 3.821  | 4.044  | 4.429  | 4.042  | 4.467  | 4.429  | 5.959  | 5.640  | 13430  | DNM2     | NM_001039520_9_+1  |
| Rrn3          | 4.168  | 4.156  | 4.438  | 4.479  | 4.456  | 4.232  | 4.296  | 4.408  | 4.673  | 4.646  | 106298 | RRN3     | NM_001039521_16_+1 |
| Leo1          | 5.172  | 5.270  | 4.146  | 4.589  | 4.391  | 4.684  | 4.101  | 4.415  | 3.550  | 4.183  | 235497 | LEO1     | NM_001039522_9_+1  |
| Parp14        | 4.198  | 3.856  | 5.153  | 4.542  | 6.115  | 5.101  | 6.440  | 5.466  | 6.527  | 6.349  | 547253 | PARP14   | NM_001039530_16_-1 |
| Zfp784        | 4.143  | 4.022  | 2.241  | 2.396  | 2.479  | 2.808  | 2.116  | 2.036  | 2.235  | 2.720  | 654801 | ZNF784   | NM_001039532_7_-1  |
| Pdxdc1        | 2.878  | 2.752  | 3.218  | 2.506  | 2.918  | 2.063  | 1.706  | 1.962  | 3.295  | 3.393  | 94184  | PDXDC1   | NM_001039533_16_-1 |
| Pstk          | 4.934  | 4.671  | 3.049  | 3.560  | 3.153  | 3.352  | 3.609  | 3.425  | 2.794  | 2.871  | 214580 | PSTK     | NM_001039534_7_+1  |
| Pigl          | 1.483  | 1.321  | 1.699  | 1.419  | 1.930  | 1.866  | 1.864  | 1.750  | 2.466  | 2.116  | 327942 | PIGL     | NM_001039536_11_+1 |
| Lif           | -4.981 | -4.981 | -4.299 | -2.770 | -4.540 | -4.904 | -1.913 | -4.780 | 0.920  | 0.639  | 16878  | LIF      | NM_001039537_11_+1 |
| Mlf1          | -4.650 | -4.260 | -4.793 | -4.877 | -4.217 | -4.955 | -4.808 | -4.970 | -4.981 | -4.863 | 17349  | MLF1     | NM_001039543_3_+1  |
| Myo6          | 2.512  | 2.129  | 3.303  | 4.743  | 2.039  | 3.762  | -0.069 | 0.987  | -0.448 | -4.981 | 17920  | MYO6     | NM_001039546_9_+1  |
| Cnnm3         | -2.773 | -3.565 | -3.113 | -0.494 | -1.646 | -1.247 | -2.049 | -1.420 | -0.118 | 1.141  | 94218  | CNNM3    | NM_001039551_1_+1  |
| Ermard        | 4.636  | 4.810  | 4.158  | 4.431  | 4.319  | 4.389  | 3.892  | 4.165  | 4.085  | 4.028  | 381062 | ERMARD   | NM_001039552_17_+1 |
| 4930467E23Rik | -4.981 | -4.981 | -4.934 | -4.975 | -4.970 | -4.980 | -4.979 | -4.980 | -4.981 | -4.981 | 626415 | NA       | NM_001039553_8_+1  |
| Angptl7       | 6.537  | 6.962  | -2.079 | 0.628  | -2.515 | 3.586  | -3.928 | 3.632  | -4.981 | 1.125  | 654812 | ANGPTL7  | NM_001039554_4_-1  |
| Rad54b        | -4.981 | -2.349 | 1.351  | 0.966  | 2.218  | 0.606  | 1.122  | -0.144 | 0.261  | -1.412 | 623474 | RAD54B   | NM_001039556_4_+1  |
| Mroh8         | -2.647 | -4.981 | -2.011 | -2.574 | -3.653 | -3.870 | -4.286 | -3.970 | -3.251 | -2.909 | 629499 | MROH8    | NM_001039557_2_-1  |
| Smco3         | -0.990 | -4.981 | -2.338 | -4.249 | -2.358 | -2.962 | -1.778 | -4.276 | -0.866 | -2.804 | 654818 | SMCO3    | NM_001039558_6_-1  |
| Gcnt7         | -0.009 | 0.121  | 0.098  | 0.064  | 0.989  | -0.058 | 0.100  | -0.650 | 1.181  | 1.171  | 654821 | GCNT7    | NM_001039560_2_-1  |
| Ankrd37       | 2.030  | 2.620  | -0.855 | -0.619 | 1.509  | 1.436  | 1.357  | 1.755  | 0.829  | 1.285  | 654824 | ANKRD37  | NM_001039562_8_-1  |
| Defb30        | -4.981 | -4.981 | -4.939 | -4.465 | -2.892 | -4.191 | -4.951 | -4.930 | -4.981 | -4.981 | 73670  | NA       | NM_001039566_14_-1 |
| Evi5l         | 2.298  | 2.717  | 2.579  | 2.058  | 2.944  | 2.853  | 2.377  | 2.219  | 1.851  | 1.893  | 213027 | NA       | NM_001039578_8_+1  |
| Abca3         | -0.198 | 2.435  | 3.567  | 4.579  | 3.693  | 4.011  | 2.428  | 3.527  | 5.471  | 4.976  | 27410  | ABCA3    | NM_001039581_17_+1 |
| Glyctk        | 2.053  | 2.060  | -0.082 | -0.482 | 0.793  | 0.150  | 0.269  | -0.391 | 0.380  | -0.314 | 235582 | GLYCTK   | NM_001039586_9_-1  |
| 1700015E13Rik | -3.028 | -4.981 | -3.915 | -4.551 | -4.451 | -4.764 | -2.926 | -4.936 | -1.309 | -4.981 | 76925  | C1orf111 | NM_001039593_1_+1  |
| Edem3         | 4.558  | 5.181  | 3.596  | 3.467  | 3.840  | 3.945  | 3.659  | 3.898  | 4.581  | 5.003  | 66967  | EDEM3    | NM_001039644_1_+1  |
| Asphd1        | -4.981 | -4.981 | -4.981 | -4.981 | -4.862 | -3.277 | -4.969 | -4.975 | -4.981 | -4.981 | 233879 | NA       | NM_001039645_7_-1  |
| Gbp10         | 1.835  | 3.111  | -0.476 | -0.801 | -1.306 | -2.846 | -2.700 | -2.631 | -3.891 | -3.289 | 626578 | GBP6     | NM_001039646_5_-1  |
| Gbp11         | -4.981 | -3.679 | -4.975 | -4.642 | -4.513 | -4.805 | -3.501 | -3.659 | -4.981 | -4.981 | 634650 | GBP6     | NM_001039647_5_-1  |
| Gm20767       | -1.302 | -1.373 | -0.402 | -3.575 | -4.965 | -4.084 | -4.941 | -4.910 | -4.981 | -3.758 | 639910 | NA       | NM_001039648_13_+1 |
| Oprm1         | -4.981 | -4.981 | -4.981 | -4.981 | -4.981 | -4.981 | -4.981 | -4.981 | -4.981 | -4.981 | 18390  | OPRM1    | NM_001039652_10_+1 |
| Rasgrf1       | -4.981 | -4.981 | -4.981 | -4.981 | -4.919 | -4.563 | -4.974 | -4.978 | -4.981 | -4.981 | 19417  | RASGRF1  | NM_001039655_9_+1  |
| Mtl5          | -2.154 | -1.648 | 0.068  | -0.457 | -0.313 | -1.338 | 1.149  | 0.915  | 2.709  | 1.502  | 17771  | TESMIN   | NM_001039657_19_+1 |
| Mtl5          | -4.981 | -3.408 | -3.542 | -2.506 | -4.578 | -4.138 | -2.855 | -3.000 | -1.371 | -1.100 | 17771  | TESMIN   | NM_001039658_19_+1 |
| Iffo1         | 3.728  | 4.056  | 2.819  | 2.279  | 2.529  | 2.496  | 3.150  | 2.591  | 3.904  | 3.430  | 320678 | IFFO1    | NM_001039669_6_+1  |
| Slc39a2       | -4.981 | -2.137 | -2.910 | -4.614 | -1.985 | -4.431 | -3.496 | -4.259 | -4.981 | -4.316 | 214922 | SLC39A2  | NM_001039676_14_+1 |
| Slc30a2       | -1.694 | -4.981 | -2.776 | -3.638 | -4.895 | -4.840 | -4.961 | -3.228 | -4.981 | -4.981 | 230810 | SLC30A2  | NM_001039677_4_+1  |
| Mks1          | 3.373  | 3.759  | 3.144  | 3.009  | 3.566  | 3.625  | 3.054  | 2.930  | 3.271  | 2.575  | 380718 | MKS1     | NM_001039684_11_+1 |
| Arhgap12      | 4.480  | 4.516  | 3.757  | 4.153  | 3.250  | 3.105  | 3.776  | 3.840  | 4.148  | 4.368  | 75415  | ARHGAP12 | NM_001039692_18_-1 |
| Pkd1l3        | -4.452 | -4.036 | -4.486 | -4.756 | -4.794 | -4.943 | -4.202 | -4.656 | -4.226 | -4.588 | 244646 | PKD1L3   | NM_001039700_8_+1  |
| Il1rn         | -2.388 | -4.981 | -4.211 | 0.578  | 2.490  | 2.045  | 5.231  | 5.843  | 3.299  | 4.542  | 16181  | IL1RN    | NM_001039701_2_+1  |
| Coq10b        | 5.616  | 6.015  | 5.550  | 5.478  | 6.268  | 6.000  | 5.703  | 5.287  | 4.467  | 4.471  | 67876  | COQ10B   | NM_001039710_1_+1  |
| Tmem120b      | 1.271  | 2.207  | 3.226  | 3.466  | 4.135  | 3.715  | 3.223  | 3.015  | -0.685 | 0.908  | 330189 | TMEM120B | NM_001039723_5_+1  |

|          |        |        |        |        |        |        |        |        |        |        |        |          |                    |
|----------|--------|--------|--------|--------|--------|--------|--------|--------|--------|--------|--------|----------|--------------------|
| Fdx1l    | 5.380  | 5.212  | 4.606  | 4.455  | 4.439  | 4.444  | 4.559  | 4.469  | 3.671  | 3.254  | 68165  | FDX1L    | NM_001039824_9_-1  |
| Strn4    | 3.816  | 4.137  | 4.745  | 4.668  | 4.712  | 4.517  | 4.524  | 4.812  | 5.444  | 5.371  | 97387  | STRN4    | NM_001039878_7_+1  |
| Map2     | -3.953 | -3.843 | -4.922 | -4.046 | -4.757 | -4.899 | -4.679 | -4.767 | -4.981 | -4.981 | 17756  | MAP2     | NM_001039934_1_+1  |
| Asxl1    | 4.574  | 4.513  | 5.268  | 5.001  | 5.692  | 5.687  | 5.328  | 5.337  | 6.133  | 5.642  | 228790 | ASXL1    | NM_001039939_2_+1  |
| Zfp606   | -1.454 | -1.013 | -0.625 | -1.266 | 0.082  | -1.720 | -0.277 | -0.739 | 0.299  | -0.608 | 67370  | ZNF606   | NM_001039951_7_+1  |
| Ahnak    | 4.400  | 3.864  | 1.189  | 0.503  | -2.096 | -1.223 | 2.145  | 2.890  | 4.871  | 3.969  | 66395  | AHNAK    | NM_001039959_19_+1 |
| Zfp869   | 5.071  | 4.876  | 4.253  | 3.987  | 4.421  | 4.465  | 4.381  | 4.233  | 4.209  | 4.221  | 66869  | ZNF91    | NM_001039965_8_-1  |
| Zfp869   | 3.636  | 3.461  | 2.803  | 2.195  | 3.338  | 3.340  | 3.265  | 2.653  | 3.183  | 2.961  | 66869  | ZNF91    | NM_001039967_8_-1  |
| Sco1     | 3.858  | 3.548  | 3.342  | 3.481  | 3.162  | 2.918  | 3.439  | 3.197  | 3.505  | 3.261  | 52892  | SCO1     | NM_001040026_11_+1 |
| Nynrin   | -4.981 | -0.178 | -4.978 | -2.952 | -4.845 | -3.728 | -1.526 | 1.011  | 2.142  | 3.607  | 277154 | NYNRIN   | NM_001040072_14_+1 |
| Sytl2    | -4.981 | -4.981 | -4.981 | -4.981 | -4.980 | -4.979 | -4.892 | -2.923 | -4.981 | -4.981 | 83671  | SYTL2    | NM_001040085_7_+1  |
| Sytl2    | -4.981 | -4.981 | -4.950 | -4.160 | -4.980 | -4.968 | -4.331 | -4.817 | -4.426 | -4.981 | 83671  | SYTL2    | NM_001040087_7_+1  |
| Sytl2    | -4.981 | -4.981 | -4.981 | -4.981 | -4.967 | -4.715 | -3.520 | -4.398 | -3.835 | -4.981 | 83671  | SYTL2    | NM_001040088_7_+1  |
| Aak1     | 2.185  | 2.267  | 1.893  | 1.376  | 2.244  | 2.511  | 1.574  | 2.878  | 2.702  | 3.546  | 269774 | AAK1     | NM_001040106_6_+1  |
| Arap1    | 1.804  | 1.703  | 5.706  | 5.751  | 0.828  | 3.027  | 4.709  | 5.132  | 6.782  | 6.783  | 69710  | ARAP1    | NM_001040111_7_+1  |
| Arap1    | 5.403  | 5.179  | 2.012  | 0.633  | 2.957  | 2.897  | 2.140  | 3.104  | 4.274  | 3.450  | 69710  | ARAP1    | NM_001040112_7_+1  |
| Tmem141  | 1.352  | 1.105  | 3.671  | 3.756  | 4.074  | 3.223  | 4.033  | 3.611  | 2.638  | 2.975  | 51875  | TMEM141  | NM_001040130_2_-1  |
| Eif4g2   | 5.685  | 6.451  | 4.842  | 6.524  | 5.194  | 5.953  | 5.939  | 6.761  | 6.105  | 7.731  | 13690  | EIF4G2   | NM_001040131_7_-1  |
| Pdzd9    | -3.065 | -4.870 | -4.761 | -4.970 | -4.971 | -4.860 | -4.031 | -4.960 | -4.981 | -4.977 | 67983  | PDZD9    | NM_001040136_7_-1  |
| Pdzd9    | -4.981 | -2.537 | -4.361 | -4.984 | -4.471 | -4.320 | -4.270 | -4.977 | -4.981 | -3.747 | 67983  | PDZD9    | NM_001040137_7_-1  |
| Ddx17    | 5.663  | 5.660  | 5.343  | 5.111  | 5.228  | 5.613  | 5.232  | 4.697  | 4.311  | 4.517  | 67040  | DDX17    | NM_001040187_15_-1 |
| Nadk2    | 2.543  | 2.720  | 4.600  | 4.519  | 3.810  | 3.646  | 3.801  | 4.168  | 4.052  | 4.727  | 68646  | NADK2    | NM_001040395_15_+1 |
| Selt     | 6.734  | 6.549  | 5.561  | 5.585  | 5.318  | 5.435  | 5.691  | 5.232  | 5.091  | 5.091  | 69227  | SELENOT  | NM_001040396_3_+1  |
| Filip1l  | -0.613 | -4.665 | -1.603 | -3.572 | -0.713 | -1.277 | -1.471 | -3.347 | -4.873 | -1.992 | 78749  | FILIP1L  | NM_001040397_16_+1 |
| Setd1b   | 3.689  | 3.895  | 2.872  | 3.122  | 4.486  | 4.230  | 3.992  | 3.108  | 3.571  | 3.362  | 208043 | NA       | NM_001040398_5_+1  |
| Larp1b   | 2.512  | 2.643  | 4.386  | 4.286  | 3.044  | 2.865  | 3.170  | 3.166  | 3.064  | 2.826  | 214048 | NA       | NM_001040399_3_+1  |
| Tet2     | 4.605  | 4.686  | 5.991  | 5.912  | 6.907  | 6.775  | 6.507  | 6.271  | 5.935  | 6.341  | 214133 | TET2     | NM_001040400_3_-1  |
| Flot2    | 4.863  | 4.784  | 4.769  | 4.768  | 4.640  | 4.622  | 4.734  | 4.758  | 7.237  | 6.743  | 14252  | FLOT2    | NM_001040403_11_+1 |
| Thsd4    | -4.981 | -4.981 | -4.981 | -4.981 | -4.981 | -4.981 | -4.981 | -4.981 | -4.981 | -4.981 | 207596 | THSD4    | NM_001040426_9_-1  |
| Tacc3    | 2.111  | 2.241  | 4.810  | 4.937  | 5.321  | 4.662  | 4.919  | 4.389  | 3.696  | 3.157  | 21335  | TACC3    | NM_001040435_5_+1  |
| Shroom4  | -4.981 | -4.981 | -2.880 | -4.717 | -4.959 | -4.489 | -4.912 | -4.586 | -4.981 | -4.981 | 208431 | SHROOM4  | NM_001040459_X_+1  |
| Dear1    | -4.981 | -4.981 | -2.820 | -4.924 | -4.078 | -4.901 | -4.976 | -3.920 | -4.981 | -4.981 | 654362 | NA       | NM_001040461_3_-1  |
| Clmn     | -4.981 | -2.299 | -4.627 | -3.349 | -2.408 | 0.489  | -3.403 | -1.148 | -1.987 | 3.213  | 94040  | CLMN     | NM_001040682_12_-1 |
| Med15    | 2.277  | 2.922  | 2.874  | 2.357  | 3.159  | 3.514  | 2.814  | 3.148  | 3.851  | 4.382  | 94112  | NA       | NM_001040683_16_-1 |
| Hsd3b7   | 1.330  | 0.932  | 2.557  | 2.856  | -0.491 | 0.592  | 1.796  | 0.446  | 1.635  | 2.161  | 101502 | HSD3B7   | NM_001040684_7_+1  |
| Zfp692   | 2.303  | 2.163  | 1.304  | 1.671  | 1.541  | 2.381  | 1.683  | 1.270  | 1.276  | 2.584  | 103836 | ZNF692   | NM_001040686_11_+1 |
| Rap1gds1 | 1.914  | 1.793  | 3.929  | 4.316  | 4.480  | 4.544  | 4.132  | 4.958  | 5.667  | 6.251  | 229877 | RAP1GDS1 | NM_001040690_3_-1  |
| Ung      | -0.716 | -1.630 | -2.771 | -4.275 | -1.399 | -1.960 | -4.759 | -2.999 | -4.047 | -4.553 | 22256  | UNG      | NM_001040691_5_+1  |
| Slc6a18  | -4.981 | -4.981 | -4.798 | -4.975 | -4.961 | -4.979 | -4.973 | -4.970 | -4.981 | -4.981 | 22598  | SLC6A18  | NM_001040692_13_-1 |
| Uevld    | 2.550  | 2.713  | 2.533  | 2.745  | 2.883  | 2.523  | 3.463  | 3.556  | 3.234  | 3.956  | 54122  | UEVLD    | NM_001040695_7_-1  |
| Nlrp1b   | -0.420 | -2.799 | 3.932  | -2.256 | 4.319  | -0.831 | 3.600  | -1.859 | 3.175  | 0.668  | 637515 | NLRP1    | NM_001040696_11_-1 |
| Mtmr7    | -2.542 | -2.107 | -2.139 | -2.519 | -2.540 | -3.218 | -2.987 | -3.190 | -1.771 | -2.398 | 54384  | MTMR7    | NM_001040699_8_-1  |
| BC051019 | -4.981 | -4.981 | -4.996 | -4.395 | -4.518 | -4.280 | -4.247 | -3.301 | -4.981 | -3.142 | 57355  | C11orf16 | NM_001040700_7_-1  |
| Pex10    | 3.344  | 3.481  | 2.001  | 2.782  | 2.759  | 2.918  | 2.530  | 2.351  | 2.073  | 2.163  | 668173 | PEX10    | NM_001042407_4_+1  |
| Txn14a   | 2.050  | -0.179 | 2.905  | 1.841  | 1.408  | 1.143  | 1.719  | 0.535  | 1.125  | 1.216  | 27366  | TXNL4A   | NM_001042408_18_+1 |
| P3h1     | -3.863 | -1.994 | -1.068 | -1.241 | -4.584 | -3.491 | -2.435 | -4.501 | -2.004 | -0.789 | 56401  | P3H1     | NM_001042411_4_+1  |
| Cabyr    | -4.803 | -4.981 | -4.878 | -4.971 | -4.934 | -4.980 | -4.974 | -4.978 | -4.786 | -4.928 | 71132  | CABYR    | NM_001042418_18_+1 |
| Cabyr    | -4.981 | -4.981 | -4.966 | -4.966 | -4.506 | -4.973 | -4.964 | -4.973 | -4.981 | -4.981 | 71132  | CABYR    | NM_001042419_18_+1 |
| Cabyr    | -4.131 | -4.981 | -4.318 | -4.488 | -4.194 | -3.686 | -4.975 | -4.977 | -4.372 | -4.262 | 71132  | CABYR    | NM_001042420_18_+1 |
| Kntc1    | -3.349 | -2.137 | 1.335  | 1.370  | 2.444  | 1.127  | 1.443  | 0.912  | -0.096 | -0.712 | 208628 | KNTC1    | NM_001042421_5_+1  |
| Zhx1     | 3.838  | 3.211  | 4.516  | 4.027  | 3.810  | 3.600  | 3.547  | 3.623  | 4.310  | 4.742  | 22770  | ZHX1     | NM_001042438_15_-1 |
| Snca     | -0.090 | 2.586  | 1.260  | 3.771  | 0.284  | 4.152  | 0.785  | 3.846  | 0.154  | 1.970  | 20617  | SNCA     | NM_001042451_6_-1  |
| Golga7   | 7.611  | 7.550  | 7.602  | 7.602  | 7.494  | 7.596  | 7.478  | 7.445  | 7.357  | 7.885  | 57437  | GOLGA7   | NM_001042484_8_-1  |
| Tmem183a | 2.097  | 2.211  | 3.262  | 3.029  | 1.787  | 1.716  | 2.713  | 1.891  | 3.111  | 2.800  | 57439  | TMEM183A | NM_001042485_1_-1  |
| Dlgap4   | 0.001  | 1.183  | 5.531  | 5.233  | 3.471  | 3.540  | 3.261  | 3.138  | 3.847  | 4.050  | 228836 | DLGAP4   | NM_001042487_2_+1  |
| Dlgap4   | 5.134  | 4.781  | 6.317  | 6.502  | 6.154  | 6.095  | 5.756  | 5.263  | 5.010  | 5.078  | 228836 | DLGAP4   | NM_001042488_2_+1  |
| Hvcn1    | 5.789  | 5.879  | 1.893  | 1.780  | 5.123  | 5.525  | 4.279  | 3.813  | 2.801  | 0.860  | 74096  | HVCN1    | NM_001042489_5_+1  |
| Anapc5   | 6.666  | 6.933  | 5.783  | 5.976  | 5.811  | 6.007  | 5.489  | 5.869  | 6.161  | 6.060  | 59008  | ANAPC5   | NM_001042491_5_-1  |
| Rabl3    | 4.043  | 3.745  | 3.728  | 3.534  | 3.638  | 3.418  | 3.144  | 3.050  | 2.975  | 2.965  | 67657  | RABL3    | NM_001042499_16_+1 |
| Fam133b  | 4.842  | 4.810  | 4.328  | 4.278  | 4.795  | 4.780  | 4.855  | 4.271  | 3.676  | 3.689  | 68152  | FAM133B  | NM_001042501_5_+1  |
| Txnrd1   | 3.204  | 2.836  | 4.965  | 5.311  | 4.685  | 4.915  | 4.776  | 5.011  | 4.991  | 4.884  | 50493  | TXNRD1   | NM_001042513_10_+1 |
| Txnrd1   | -4.396 | -3.911 | 2.505  | 2.176  | 2.289  | 2.093  | 2.721  | 2.272  | 2.691  | 2.491  | 50493  | TXNRD1   | NM_001042514_10_+1 |
| Txnrd1   | -4.755 | -4.410 | -0.547 | -0.650 | -0.557 | -0.394 | 0.440  | -0.231 | -0.052 | 1.654  | 50493  | TXNRD1   | NM_001042523_10_+1 |
| Blm      | 1.532  | 0.887  | 1.696  | 0.183  | 1.886  | 1.245  | 1.655  | 0.880  | 1.858  | 0.692  | 12144  | BLM      | NM_001042527_7_-1  |
| Cacna1b  | -4.395 | -4.981 | -2.622 | -4.240 | -3.953 | -4.743 | -4.975 | -4.804 | -4.981 | -1.284 | 12287  | CACNA1B  | NM_001042528_2_-1  |
| Capg     | 6.700  | 5.353  | -1.985 | 0.707  | -0.889 | 2.411  | 2.721  | 4.191  | 6.987  | 5.129  | 12332  | CAPG     | NM_001042534_6_+1  |
| Akap1    | -2.246 | -0.894 | -0.556 | 0.226  | -1.715 | -1.654 | -0.910 | 0.076  | 1.148  | 1.998  | 11640  | AKAP1    | NM_001042541_11_-1 |
| Rpf2     | 0.555  | 1.205  | 1.225  | 1.299  | -0.530 | 0.406  | -1.029 | 0.015  | -0.023 | -0.599 | 67239  | RPF2     | NM_001042556_10_-1 |
| Map2k7   | -3.889 | -3.560 | -2.477 | -3.800 | -3.251 | -4.272 | -2.074 | -4.255 | -1.931 | -3.381 | 26400  | MAP2K7   | NM_001042557_8_+1  |
| Apaf1    | 2.574  | 0.348  | 4.082  | 2.800  | 3.415  | 2.918  | 4.089  | 3.075  | 5.039  | 4.090  | 11783  | APAF1    | NM_001042558_10_-1 |
| Cd27     | -4.844 | -3.007 | -2.699 | -2.708 | -2.964 | -3.545 | -3.343 | -4.893 | -4.415 | -2.813 | 21940  | CD27     | NM_001042564_6_-1  |
| Wsb1     | 1.121  | 2.681  | 2.379  | 2.440  | 2.102  | 2.180  | 2.792  | 3.308  | 3.978  | 4.720  | 78889  | WSB1     | NM_001042565_11_-1 |
| Cd63     | -4.539 | -3.798 | -2.655 | -1.500 | -4.767 | -1.468 | -2.120 | -2.809 | -0.837 | -4.958 | 12512  | CD63     | NM_001042580_10_+1 |
| Arrdc3   | 5.479  | 5.972  | 4.564  | 4.802  | 4.205  | 4.364  | 4.979  | 5.266  | 6.353  | 6.416  | 105171 | ARRDC3   | NM_001042591_13_+1 |

|           |        |        |        |        |        |        |        |        |        |        |        |          |                        |
|-----------|--------|--------|--------|--------|--------|--------|--------|--------|--------|--------|--------|----------|------------------------|
| Arrdc4    | 3.622  | 3.910  | 5.448  | 5.196  | 4.906  | 4.526  | 4.953  | 4.517  | 6.115  | 5.913  | 66412  | ARRDC4   | NM_001042592_7_-1      |
| Hbs1l     | 0.253  | 0.355  | 0.530  | -0.074 | -1.829 | -0.343 | 0.719  | -0.543 | 0.958  | 1.266  | 56422  | HBS1L    | NM_001042593_10_+1     |
| Cd74      | 9.568  | 9.735  | 12.571 | 12.778 | 12.635 | 12.977 | 12.761 | 12.856 | 8.175  | 8.403  | 16149  | CD74     | NM_001042605_18_+1     |
| Sstr2     | -0.997 | -2.857 | -4.819 | -4.493 | -4.693 | -4.596 | -4.966 | -4.138 | -4.981 | -4.981 | 20606  | SSTR2    | NM_001042606_11_+1     |
| Ryk       | -4.350 | -4.307 | -2.215 | -4.546 | -4.744 | 0.017  | -4.511 | -1.653 | -4.762 | -0.923 | 20187  | RYK      | NM_001042607_9_+1      |
| Sepp1     | 4.669  | 3.796  | 1.844  | 1.663  | 1.421  | 0.580  | 2.272  | 2.740  | 2.976  | 4.395  | 20363  | SELENOP  | NM_001042613_15_+1     |
| Sepp1     | -0.854 | 0.711  | -1.513 | -1.217 | -2.254 | -3.036 | -2.031 | 0.983  | 1.755  | 1.010  | 20363  | SELENOP  | NM_001042614_15_+1     |
| Htra3     | -4.981 | -4.981 | -4.966 | -4.966 | -4.983 | -4.174 | -3.375 | 0.476  | -2.605 | -0.359 | 78558  | HTRA3    | NM_001042615_5_-1      |
| Cadps     | -4.981 | -4.981 | -4.960 | -4.831 | -3.419 | -4.523 | -4.981 | -4.981 | -4.533 | -4.981 | 27062  | CADPS    | NM_001042617_14_-1     |
| Dhx15     | 1.220  | 0.785  | 0.714  | 0.453  | 0.861  | 0.372  | 0.717  | 0.329  | 1.636  | 1.846  | 13204  | DHX15    | NM_001042620_5_-1      |
| Phc1      | 5.098  | 4.577  | 2.292  | 1.667  | 5.272  | 4.957  | 2.957  | 1.370  | 1.446  | 1.195  | 13619  | PHC1     | NM_001042623_6_-1      |
| Clk1      | 6.214  | 6.458  | 6.320  | 6.055  | 6.650  | 6.804  | 6.217  | 6.207  | 5.001  | 5.818  | 12747  | CLK1     | NM_001042634_1_-1      |
| Dcun1d2   | 1.124  | 1.246  | 1.339  | 0.147  | 0.517  | -0.631 | 0.690  | 0.322  | 0.614  | 0.729  | 102323 | DCUN1D2  | NM_001042649_8_-1      |
| Dcun1d2   | 2.298  | 2.623  | 3.099  | 3.219  | 2.825  | 2.703  | 3.070  | 2.902  | 3.367  | 3.593  | 102323 | DCUN1D2  | NM_001042650_8_-1      |
| Dcun1d2   | -4.326 | -1.391 | -0.327 | 0.593  | 0.102  | -1.796 | -0.307 | -0.204 | -0.248 | 1.010  | 102323 | DCUN1D2  | NM_001042651_8_-1      |
| Nusap1    | -1.813 | -0.908 | -0.078 | -0.266 | 1.767  | -0.647 | 0.563  | -0.215 | -0.759 | -4.942 | 108907 | NUSAP1   | NM_001042652_2_+1      |
| Oip5      | -0.792 | -0.623 | 1.935  | 1.375  | 2.724  | 1.919  | 2.180  | 1.694  | 0.323  | -1.218 | 70645  | OIP5     | NM_001042653_2_-1      |
| Tbc1d17   | 6.055  | 6.137  | 5.073  | 5.023  | 5.318  | 5.406  | 5.516  | 5.575  | 5.955  | 5.701  | 233204 | TBC1D17  | NM_001042655_7_-1      |
| Fzd5      | -1.811 | -0.885 | -0.252 | -0.072 | -0.886 | -2.077 | -1.224 | -2.194 | -2.353 | -1.047 | 14367  | FZD5     | NM_001042659_1_-1      |
| Smad7     | 3.693  | 4.030  | 3.636  | 3.197  | 5.143  | 4.486  | 4.317  | 4.150  | 2.607  | 3.145  | 17131  | SMAD7    | NM_001042660_18_+1     |
| Mterf1b   | 1.433  | 3.218  | 0.237  | 1.515  | 1.369  | 2.617  | 0.946  | 2.049  | 1.060  | 2.428  | 208595 | MTERF1   | NM_001042670_5_+1      |
| Gpcpd1    | 5.158  | 4.981  | 3.380  | 3.225  | 3.845  | 4.220  | 4.204  | 3.970  | 4.399  | 4.200  | 74182  | GPCPD1   | NM_001042672_2_-1      |
| Fancc     | -1.357 | -1.802 | -1.579 | -2.093 | -0.279 | -0.689 | -0.443 | -2.011 | 0.531  | -0.786 | 14088  | FANCC    | NM_001042673_13_-1     |
| Rbpms     | 3.027  | 0.464  | 2.271  | 1.506  | 2.644  | 0.662  | 5.078  | 4.595  | 5.661  | 5.458  | 19663  | RBPMS    | NM_001042674_8_-1      |
| Rbpms     | 1.525  | -0.466 | 1.285  | -0.157 | 2.013  | 0.106  | 3.779  | 2.702  | 3.257  | 2.684  | 19663  | RBPMS    | NM_001042675_8_-1      |
| Syne3     | 0.843  | -0.556 | -1.080 | -1.839 | -1.533 | -1.889 | 1.441  | 0.463  | 4.060  | 3.484  | 212073 | SYNE3    | NM_001042699_12_-1     |
| Ilf3      | 3.344  | 3.715  | 2.781  | 2.965  | 3.453  | 3.766  | 2.878  | 2.956  | 0.630  | 2.018  | 16201  | ILF3     | NM_001042707_9_+1      |
| Ilf3      | 0.644  | 0.249  | 0.689  | 0.646  | 1.189  | -0.227 | 0.110  | -0.465 | 0.298  | 1.106  | 16201  | ILF3     | NM_001042708_9_+1      |
| Ilf3      | 0.670  | 0.618  | 1.147  | 1.279  | 1.351  | 1.232  | 0.876  | 1.466  | -0.397 | 0.516  | 16201  | ILF3     | NM_001042709_9_+1      |
| Prss57    | 4.986  | 3.526  | 3.447  | 2.898  | 1.548  | 1.060  | 1.218  | 2.162  | 2.025  | -3.683 | 73106  | PRSS57   | NM_001042710_10_-1     |
| Amy2a5    | -1.178 | -3.847 | -4.105 | -4.480 | -4.958 | -4.032 | -4.324 | -3.934 | -4.981 | -2.261 | 109959 | AMY2B    | NM_001042711_3_-1      |
| Amy2a5    | -1.178 | -0.935 | -4.105 | -4.480 | -4.958 | -4.032 | -4.324 | -3.934 | -4.981 | -2.261 | 109959 | AMY2B    | NM_001042711_dup1_3_-2 |
| Amy2a5    | -1.178 | -0.935 | -4.105 | -4.480 | -4.958 | -4.032 | -4.324 | -3.934 | -4.981 | -2.261 | 109959 | AMY2B    | NM_001042711_dup2_3_-3 |
| Amy2a5    | -1.178 | -0.935 | -4.105 | -4.480 | -4.958 | -4.032 | -4.324 | -3.934 | -4.981 | -2.261 | 109959 | AMY2B    | NM_001042711_dup3_3_-4 |
| Ankdd1b   | 0.906  | 0.977  | 0.107  | -1.447 | 0.514  | 0.182  | 0.043  | -0.220 | -0.550 | 0.209  | 271144 | ANKDD1B  | NM_001042714_13_-1     |
| Ddhd1     | 1.437  | -2.649 | 1.149  | 1.186  | 3.840  | 3.201  | 2.953  | -0.173 | 1.340  | 2.680  | 114874 | DDHD1    | NM_001042719_14_-1     |
| Rarg      | -0.711 | -0.032 | 1.015  | 0.154  | 3.065  | 1.829  | 3.698  | 3.359  | 5.324  | 5.333  | 19411  | RARG     | NM_001042727_15_-1     |
| Mast2     | -2.022 | -3.670 | -0.476 | 0.027  | -1.411 | -2.017 | 1.205  | -0.412 | 0.998  | 1.169  | 17776  | MAST2    | NM_001042743_4_-1      |
| Neo1      | 1.186  | 0.014  | -0.938 | 0.419  | 1.395  | 3.190  | 0.906  | 1.262  | -0.712 | -0.559 | 18007  | NEO1     | NM_001042752_9_-1      |
| Slc22a18  | -4.064 | -4.981 | -4.339 | -4.753 | -4.549 | -4.877 | -4.319 | -4.787 | -4.364 | -4.799 | 18400  | SLC22A18 | NM_001042760_7_+1      |
| Sema3b    | -4.981 | -4.393 | -4.968 | -4.933 | -4.978 | -4.960 | -4.978 | -4.946 | -4.845 | -4.981 | 20347  | SEMA3B   | NM_001042779_9_-1      |
| Dnnt      | 7.883  | 6.856  | -4.890 | -2.747 | -3.994 | -3.743 | -2.859 | -2.541 | -4.032 | -4.981 | 21673  | DNNT     | NM_001043228_19_+1     |
| Cd22      | -3.841 | 3.085  | 1.186  | 4.527  | 7.327  | 7.536  | 6.412  | 6.588  | 2.368  | 2.106  | 12483  | CD22     | NM_001043317_7_-1      |
| Eml1      | -4.981 | -4.981 | -4.976 | -4.940 | -4.981 | -4.980 | -4.978 | -4.973 | -4.981 | -4.981 | 68519  | EML1     | NM_001043335_12_+1     |
| Eml1      | -4.981 | -4.981 | -4.802 | -3.579 | -4.984 | -2.634 | -4.790 | -1.347 | -4.981 | -4.981 | 68519  | EML1     | NM_001043336_12_+1     |
| Map6      | -4.981 | -4.981 | -3.128 | -4.375 | -3.764 | -4.452 | -3.309 | -2.978 | -3.864 | -4.981 | 17760  | MAP6     | NM_001043355_7_+1      |
| Cacna1i   | -4.981 | -4.981 | -4.691 | -2.295 | -4.488 | -2.754 | -4.608 | -0.099 | -4.981 | -2.601 | 239556 | CACNA1I  | NM_001044308_15_+1     |
| Rad17     | 5.097  | 5.006  | 4.652  | 4.595  | 4.620  | 4.718  | 4.480  | 4.440  | 4.493  | 4.720  | 19356  | RAD17    | NM_001044371_13_-1     |
| Ubtf      | 4.649  | 4.561  | 2.729  | 3.604  | 3.913  | 3.455  | 4.011  | 3.024  | 4.468  | 4.177  | 21429  | UBTF     | NM_001044383_11_-1     |
| Timp1     | -2.273 | -4.981 | -4.886 | -4.627 | -4.957 | -4.957 | -4.831 | -2.527 | -4.780 | -4.945 | 21857  | TIMP1    | NM_001044384_X_+1      |
| Zfx       | 5.002  | 4.537  | 5.245  | 5.108  | 4.973  | 5.146  | 4.980  | 4.848  | 4.803  | 5.186  | 22764  | ZFX      | NM_001044386_X_-1      |
| Clpx      | 1.707  | 2.241  | 2.391  | 2.759  | 2.812  | 2.052  | 2.200  | 1.957  | 2.227  | 2.774  | 270166 | CLPX     | NM_001044389_9_+1      |
| Zfp2      | -3.715 | 0.298  | -4.614 | -3.595 | -4.885 | -2.575 | -4.025 | -3.962 | -4.981 | -4.465 | 22678  | ZFP2     | NM_001044697_11_-1     |
| Zfp2      | -1.993 | -2.110 | -4.583 | -2.228 | -4.683 | -1.259 | -3.985 | -2.634 | -4.816 | -4.138 | 22678  | ZFP2     | NM_001044698_11_-1     |
| Zfp2      | -1.318 | -1.108 | -4.957 | -2.227 | -3.148 | -3.637 | -2.982 | -1.990 | -1.911 | -1.431 | 22678  | ZFP2     | NM_001044700_11_-1     |
| Zscan21   | -3.235 | 2.618  | -3.782 | 2.568  | -2.599 | 2.499  | -3.102 | 2.109  | -0.548 | 2.690  | 22697  | ZSCAN21  | NM_001044703_5_+1      |
| Zscan21   | 2.720  | 1.103  | 3.089  | 1.042  | 2.034  | 0.657  | 2.236  | 0.471  | 1.895  | 0.456  | 22697  | ZSCAN21  | NM_001044704_5_+1      |
| Zscan21   | -1.929 | 2.905  | -2.517 | 2.276  | -0.718 | 1.670  | -1.034 | 1.641  | -1.574 | 2.001  | 22697  | ZSCAN21  | NM_001044705_5_+1      |
| Zfp41     | 0.823  | 0.985  | 0.823  | 0.372  | 1.710  | 1.460  | 0.806  | 1.123  | 0.539  | 1.353  | 22701  | ZFP41    | NM_001044718_15_+1     |
| D17Wsu92e | 1.760  | 3.251  | 2.134  | 2.261  | 1.761  | 1.248  | 2.395  | 1.877  | 3.757  | 2.917  | 224647 | C6orf106 | NM_001044719_17_-1     |
| Abcc9     | -4.981 | -4.981 | -4.949 | -4.694 | -4.853 | -4.854 | -4.519 | -4.818 | -4.436 | -4.531 | 20928  | ABCC9    | NM_001044720_6_-1      |
| Slc7a2    | -4.981 | -3.562 | -2.582 | -3.419 | -2.047 | -4.903 | -2.868 | -3.679 | -1.086 | -2.023 | 11988  | SLC7A2   | NM_001044740_8_+1      |
| Cacnb3    | 1.585  | -3.267 | 6.572  | 6.961  | 6.189  | 6.190  | 4.314  | 3.448  | -3.322 | -3.797 | 12297  | CACNB3   | NM_001044741_15_+1     |
| Gcdh      | 3.297  | 4.163  | 2.926  | 3.194  | 3.033  | 3.085  | 2.936  | 3.244  | 1.721  | 2.169  | 270076 | GCDH     | NM_001044744_8_-1      |
| Zfp68     | 4.442  | 3.115  | 3.097  | 2.829  | 3.235  | 1.796  | 3.156  | 2.160  | 2.919  | 2.419  | 24135  | NA       | NM_001044747_5_-1      |
| Hsd11b1   | 2.975  | 1.612  | -3.726 | -0.159 | -3.449 | -0.680 | 3.810  | 2.594  | 4.925  | 3.671  | 15483  | HSD11B1  | NM_001044751_1_-1      |
| Rbak      | 2.435  | 2.838  | 2.691  | 2.348  | 2.727  | 2.583  | 2.730  | 2.251  | 3.989  | 3.198  | 57782  | RBAK     | NM_001045482_5_-1      |
| Mapk1ip1  | 4.945  | 4.726  | 3.410  | 3.737  | 3.509  | 3.724  | 3.406  | 3.520  | 3.356  | 3.376  | 69546  | NA       | NM_001045483_7_-1      |
| Mef2b     | -0.492 | -0.801 | -3.463 | -2.847 | -2.317 | -1.020 | -4.356 | -0.500 | -3.925 | -2.684 | 17259  | MEF2B    | NM_001045484_8_+1      |
| Zfp180    | 2.105  | 3.057  | 3.910  | 2.942  | 1.813  | 1.867  | 3.304  | 1.851  | 4.636  | 4.088  | 210135 | ZNF180   | NM_001045486_7_+1      |
| Mfge8     | 3.076  | 2.751  | 1.587  | 2.446  | 2.756  | 3.049  | 3.193  | 2.821  | 3.621  | 3.292  | 17304  | MFGE8    | NM_001045489_7_-1      |
| Raph1     | 2.236  | 3.301  | 1.773  | 2.341  | 1.874  | 2.131  | 3.103  | 3.468  | 3.741  | 3.867  | 77300  | RAPH1    | NM_001045513_1_-1      |
| Akna      | 5.246  | 5.637  | 7.248  | 7.030  | 7.282  | 7.492  | 7.141  | 7.209  | 8.020  | 7.808  | 100182 | AKNA     | NM_001045514_4_-1      |
| Synj1     | 4.025  | 4.539  | 5.586  | 5.752  | 5.556  | 5.807  | 5.661  | 5.302  | 5.958  | 5.767  | 104015 | SYNJ1    | NM_001045515_16_-1     |

|               |        |        |        |        |        |        |        |        |        |        |        |          |                    |
|---------------|--------|--------|--------|--------|--------|--------|--------|--------|--------|--------|--------|----------|--------------------|
| Proca1        | -3.843 | -2.681 | -2.037 | -2.297 | -3.838 | -4.084 | -3.969 | -3.142 | -1.816 | -3.459 | 216974 | PROCA1   | NM_001045516_11_+1 |
| Clint1        | 6.637  | 6.643  | 7.285  | 7.164  | 7.221  | 7.245  | 7.431  | 7.460  | 8.223  | 8.241  | 216705 | CLINT1   | NM_001045520_11_+1 |
| Bahd1         | 2.950  | 2.693  | 3.321  | 3.102  | 3.321  | 3.102  | 3.257  | 2.839  | 3.214  | 3.291  | 228536 | BAHD1    | NM_001045523_2_+1  |
| Cep126        | -2.573 | -0.710 | -4.017 | -4.515 | -2.520 | -2.625 | -4.482 | -4.904 | -3.925 | -3.210 | 234915 | CEP126   | NM_001045524_9_-1  |
| Cyb5d1        | 1.267  | 0.339  | 1.176  | 0.567  | 1.035  | 0.574  | 1.061  | 0.066  | 1.767  | 1.547  | 327951 | CYB5D1   | NM_001045525_11_-1 |
| Scimp         | 8.902  | 9.138  | 7.168  | 6.937  | 6.662  | 6.766  | 5.954  | 5.377  | 1.205  | 0.924  | 327957 | SCIMP    | NM_001045526_11_-1 |
| Hsf5          | -4.981 | -4.981 | -2.611 | -4.314 | -3.506 | -4.537 | -4.391 | -4.782 | -4.981 | -4.981 | 327992 | HSF5     | NM_001045527_11_+1 |
| Fkbp15        | 5.278  | 5.201  | 6.014  | 6.041  | 6.272  | 6.422  | 6.097  | 6.057  | 6.825  | 6.863  | 338355 | FKBP15   | NM_001045528_4_-1  |
| Morc3         | 5.690  | 5.852  | 6.119  | 5.999  | 6.464  | 6.251  | 6.513  | 6.337  | 7.044  | 7.125  | 338467 | MORC3    | NM_001045529_16_+1 |
| Ccnj1         | -4.981 | -4.981 | -4.871 | -3.682 | -3.916 | -3.719 | -4.969 | -4.175 | -4.981 | -4.342 | 380694 | NA       | NM_001045530_11_+1 |
| March4        | -4.981 | -4.981 | -4.952 | -4.952 | -4.861 | -4.775 | -4.976 | -4.904 | -3.635 | -3.754 | 381270 | MARCH4   | NM_001045533_1_-1  |
| Zzef1         | 4.873  | 4.859  | 5.120  | 5.174  | 5.338  | 5.413  | 5.054  | 4.900  | 5.414  | 5.019  | 195018 | ZZEF1    | NM_001045536_11_+1 |
| Gm12185       | -2.520 | -2.522 | 1.417  | 1.454  | 1.486  | 1.132  | 1.218  | 0.195  | 0.095  | 0.805  | 620913 | NA       | NM_001045540_11_-1 |
| Gm12253       | 4.273  | 2.949  | -4.244 | -4.559 | -4.950 | -4.906 | -4.724 | -4.188 | -4.981 | -4.981 | 624860 | NA       | NM_001045542_11_+1 |
| Heatr9        | -4.981 | -4.981 | -1.072 | -1.054 | -1.032 | -1.907 | -2.076 | -2.367 | -4.981 | -4.981 | 629303 | HEATR9   | NM_001045543_11_-1 |
| Zfp868        | -0.537 | 2.881  | 0.627  | 1.356  | 1.128  | 1.568  | 1.127  | 1.047  | 0.372  | 0.990  | 234362 | NA       | NM_001045553_8_-1  |
| Tulp2         | -3.737 | -4.981 | -4.897 | -4.745 | -4.815 | -4.911 | -4.479 | -4.897 | -4.981 | -4.621 | 56734  | TULP2    | NM_001045555_7_+1  |
| Pick1         | 2.187  | 2.512  | 3.641  | 3.674  | 3.615  | 3.825  | 3.304  | 3.111  | 2.991  | 2.873  | 18693  | PICK1    | NM_001045558_15_+1 |
| Zfp952        | 3.777  | 3.352  | 3.268  | 3.125  | 3.563  | 3.234  | 3.281  | 3.008  | 3.239  | 3.448  | 240067 | NA       | NM_001045559_17_+1 |
| Rbm15         | 1.263  | 1.673  | 1.792  | 1.643  | 2.299  | 2.163  | 2.030  | 1.846  | 2.613  | 2.506  | 229700 | RBM15    | NM_001045807_3_-1  |
| Nelfe         | 4.359  | 4.229  | 5.207  | 5.313  | 5.059  | 5.244  | 4.543  | 3.816  | 2.683  | 2.314  | 27632  | NELFE    | NM_001045863_17_+1 |
| Nelfe         | 2.485  | 1.694  | 3.826  | 3.775  | 4.465  | 4.691  | 3.561  | 2.675  | 0.988  | 0.713  | 27632  | NELFE    | NM_001045864_17_+1 |
| Mink1         | 1.900  | -2.478 | 0.151  | 0.925  | 3.192  | 3.609  | 2.681  | 0.955  | 2.594  | 2.797  | 50932  | MINK1    | NM_001045959_11_+1 |
| Mink1         | -3.696 | -2.923 | -0.448 | -2.121 | -1.462 | 0.932  | -0.172 | -1.415 | 0.519  | 0.892  | 50932  | MINK1    | NM_001045964_11_+1 |
| Snrpa         | 3.000  | 3.006  | 2.958  | 3.443  | 3.321  | 3.438  | 2.655  | 2.688  | 2.113  | 2.358  | 53607  | NA       | NM_001046637_7_-1  |
| Net1          | 7.378  | 7.791  | 6.693  | 6.827  | 1.985  | 2.466  | 4.021  | 4.756  | 2.794  | 2.351  | 56349  | NET1     | NM_001047159_13_-1 |
| Dph3          | 1.638  | 2.091  | 2.168  | 1.822  | 1.711  | 0.607  | 2.763  | 2.480  | 2.512  | 1.942  | 105638 | DPH3     | NM_001047433_14_-1 |
| Pard6a        | 3.762  | 3.303  | 2.424  | 1.849  | 2.148  | 2.039  | 1.429  | 0.844  | 0.827  | 1.005  | 56513  | PARD6A   | NM_001047435_8_+1  |
| Pard6a        | 3.011  | 2.326  | 1.886  | 1.522  | 1.682  | 1.444  | 1.209  | 1.320  | 1.673  | 0.628  | 56513  | PARD6A   | NM_001047436_8_+1  |
| Ttc21b        | 1.845  | 2.258  | 1.877  | 2.442  | 2.244  | 2.413  | 0.506  | 1.495  | 0.543  | 1.090  | 73668  | TTC21B   | NM_001047604_2_-1  |
| 1110017D15Rik | -2.841 | -4.981 | -4.578 | -4.925 | -4.981 | -4.981 | -4.679 | -4.981 | -4.981 | -4.981 | 73721  | C9orf24  | NM_001048005_4_-1  |
| Agtpbbp1      | -4.981 | -4.368 | -4.572 | -2.145 | -4.935 | -2.694 | -2.506 | -4.953 | -4.653 | -4.413 | 67269  | AGTPBBP1 | NM_001048008_13_-1 |
| Dusp16        | 2.191  | 0.934  | 3.011  | 2.312  | 3.198  | 2.965  | 3.541  | 2.310  | 1.636  | 0.146  | 70686  | DUSP16   | NM_001048054_6_-1  |
| Rpl38         | 5.692  | 5.533  | 6.041  | 5.992  | 5.473  | 5.723  | 6.067  | 5.949  | 4.538  | 4.312  | 67671  | RPL38    | NM_001048057_11_+1 |
| Rpl38         | -3.982 | -4.169 | 4.617  | 2.955  | 4.562  | 2.619  | 0.883  | 4.219  | 0.964  | 2.401  | 67671  | RPL38    | NM_001048058_11_+1 |
| Idnk          | 6.051  | 6.045  | 5.348  | 5.398  | 5.355  | 5.565  | 5.616  | 5.361  | 4.641  | 4.482  | 75731  | IDNK     | NM_001048060_13_+1 |
| Hnrrnpab      | 7.081  | 7.599  | 7.554  | 7.896  | 7.610  | 7.662  | 7.056  | 7.384  | 6.117  | 6.268  | 15384  | HNRNPAB  | NM_001048061_11_-1 |
| Mon1b         | 2.026  | 1.710  | 2.176  | 2.450  | 1.321  | 1.780  | 1.263  | 1.705  | 2.466  | 1.968  | 270096 | MON1B    | NM_001048143_8_+1  |
| Syce1l        | -4.981 | -4.981 | -4.974 | -4.973 | -4.904 | -4.957 | -4.933 | -4.957 | -4.917 | -4.947 | 668110 | SYCE1L   | NM_001048145_8_+1  |
| Azi2          | 0.283  | 1.497  | 0.004  | 1.144  | -0.233 | -0.026 | -0.333 | 0.297  | 0.629  | 0.945  | 27215  | AZI2     | NM_001048146_9_+1  |
| Zgpat         | 3.940  | 4.171  | 3.993  | 3.999  | 4.276  | 4.098  | 3.468  | 3.534  | 3.570  | 3.556  | 229007 | ZGPAT    | NM_001048148_2_+1  |
| Nfyc          | 2.395  | 1.710  | -1.703 | -0.027 | -1.418 | -0.233 | 0.681  | -1.707 | -3.701 | -2.961 | 18046  | NFYC     | NM_001048168_4_-1  |
| Adam28        | -4.362 | -4.077 | -4.547 | -4.753 | -4.691 | -3.895 | -4.641 | -4.737 | -4.296 | -3.058 | 13522  | ADAM28   | NM_001048175_14_-1 |
| Cerkl         | 1.755  | 1.218  | 0.413  | -0.689 | 1.369  | 0.740  | 0.964  | 0.170  | 1.053  | 0.687  | 228094 | CERKL    | NM_001048176_2_-1  |
| Jak2          | 3.041  | 4.394  | 1.207  | 1.244  | 3.456  | 2.469  | 3.663  | 1.625  | 0.904  | -0.093 | 16452  | JAK2     | NM_001048177_19_+1 |
| Ghr           | -4.981 | -4.981 | -4.786 | -3.976 | -3.561 | -4.863 | -4.395 | -4.889 | -4.981 | -3.652 | 14600  | GHR      | NM_001048178_15_-1 |
| Ccl27a        | 2.493  | 2.475  | 0.451  | -0.223 | -0.730 | -2.936 | 0.019  | -0.583 | -0.570 | 0.749  | 20301  | NA       | NM_001048179_4_-1  |
| Agbl5         | -3.619 | -1.287 | -2.261 | -3.459 | -1.135 | -4.674 | -2.427 | -1.050 | -2.063 | -4.650 | 231093 | AGBL5    | NM_001048192_5_+1  |
| Zfp455        | 1.923  | 2.257  | 2.163  | 1.489  | 1.586  | 1.571  | 2.111  | 1.268  | 1.857  | 2.274  | 218311 | NA       | NM_001048204_13_+1 |
| Gypc          | 4.708  | 4.636  | 5.655  | 5.947  | 6.386  | 6.156  | 5.635  | 5.627  | 5.373  | 5.008  | 71683  | GYPC     | NM_001048207_18_-1 |
| Med14         | 3.875  | 4.257  | 5.070  | 4.730  | 4.632  | 4.598  | 4.530  | 4.560  | 4.686  | 5.459  | 26896  | MED14    | NM_001048208_X_-1  |
| Dbndd2        | -0.136 | -0.832 | -1.398 | -2.677 | -3.778 | -3.577 | -2.382 | -0.031 | -0.428 | -4.183 | 52840  | DBNDD2   | NM_001048227_2_+1  |
| Dbndd2        | -1.745 | 0.548  | 1.146  | -0.396 | -1.030 | -4.384 | -2.536 | -0.159 | -0.611 | -0.969 | 52840  | DBNDD2   | NM_001048228_2_+1  |
| Dbndd2        | -1.900 | 0.650  | 0.542  | -0.883 | -4.192 | -4.305 | -2.976 | -0.562 | -2.197 | 0.207  | 52840  | DBNDD2   | NM_001048229_2_+1  |
| Smim15        | 6.432  | 6.565  | 5.410  | 5.366  | 5.169  | 5.280  | 5.451  | 5.442  | 5.045  | 5.527  | 75616  | SMIM15   | NM_001048250_13_+1 |
| Tnpo1         | 1.062  | -1.086 | -0.604 | 0.215  | -0.484 | -1.953 | 0.368  | -0.872 | -0.095 | 1.801  | 238799 | TNPO1    | NM_001048267_13_-1 |
| Usp33         | -2.196 | -3.699 | -1.461 | -4.233 | -4.086 | -3.612 | -1.816 | -4.199 | 0.523  | -4.046 | 170822 | USP33    | NM_001076676_3_+1  |
| Gm9733        | -1.718 | -0.301 | 0.543  | 0.304  | 6.037  | 6.511  | 7.021  | 7.371  | 7.792  | 8.078  | 751864 | NA       | NM_001076679_3_-1  |
| Lyrn9         | 2.737  | 2.945  | 2.705  | 2.918  | 3.018  | 3.904  | 2.826  | 2.933  | 2.494  | 2.827  | 66274  | LYRM9    | NM_001076681_11_+1 |
| Cbx5          | 3.214  | 3.605  | 3.801  | 4.303  | 5.208  | 5.047  | 4.594  | 4.420  | 2.898  | 3.267  | 12419  | CBX5     | NM_001076789_15_-1 |
| Zfp874b       | 2.084  | 2.414  | 1.891  | 2.113  | 1.626  | 2.086  | 2.357  | 2.932  | 2.864  | 3.196  | 408067 | NA       | NM_001076791_13_-1 |
| Bsg           | 8.588  | 8.657  | 7.683  | 8.012  | 7.550  | 7.811  | 7.443  | 7.952  | 7.524  | 7.482  | 12215  | BSG      | NM_001077184_10_+1 |
| Fcgr2b        | 4.867  | 6.046  | 6.295  | 2.395  | 2.726  | 2.441  | 5.387  | 5.384  | 4.383  | 3.244  | 14130  | FCGR2B   | NM_001077189_1_-1  |
| Abi1          | 5.208  | 5.173  | 5.549  | 5.494  | 5.152  | 5.253  | 5.325  | 5.408  | 5.250  | 5.947  | 11308  | ABI1     | NM_001077190_2_-1  |
| Abi1          | 4.598  | 4.616  | 5.403  | 5.484  | 4.814  | 5.102  | 5.251  | 5.556  | 6.123  | 6.442  | 11308  | ABI1     | NM_001077192_2_-1  |
| Abi1          | 5.925  | 5.961  | 6.361  | 6.219  | 5.849  | 5.910  | 6.137  | 6.280  | 6.368  | 7.224  | 11308  | ABI1     | NM_001077193_2_-1  |
| Hs6st2        | -4.981 | -4.981 | -4.948 | -4.951 | -4.948 | -4.975 | -4.979 | -4.977 | -4.981 | -4.752 | 50786  | HS6ST2   | NM_001077202_X_-1  |
| BC003331      | -0.099 | -0.560 | -0.347 | 0.038  | 0.289  | -1.437 | 0.645  | -0.355 | -0.787 | 0.312  | 226499 | C1orf27  | NM_001077237_1_-1  |
| Ap2a1         | 3.675  | 3.774  | 4.377  | 4.384  | 4.397  | 4.304  | 4.406  | 4.628  | 5.541  | 5.374  | 11771  | AP2A1    | NM_001077264_7_-1  |
| Hnrrnpd       | 5.846  | 5.611  | 6.039  | 6.089  | 6.463  | 6.200  | 6.021  | 5.867  | 6.040  | 5.768  | 11991  | HNRNPd   | NM_001077265_5_-1  |
| Hnrrnpd       | 5.082  | 5.293  | 5.543  | 5.404  | 5.280  | 5.212  | 5.231  | 5.074  | 5.771  | 5.310  | 11991  | HNRNPd   | NM_001077266_5_-1  |
| Hnrrnpd       | 3.687  | 3.846  | 4.077  | 3.943  | 3.656  | 3.557  | 3.567  | 3.502  | 4.271  | 3.859  | 11991  | HNRNPd   | NM_001077267_5_-1  |
| Gsta3         | -4.798 | -4.981 | -4.947 | -4.958 | -4.858 | -4.956 | -4.885 | -4.969 | -4.981 | -4.867 | 14859  | GSTA3    | NM_001077353_1_+1  |
| C77370        | -4.981 | -4.981 | -4.950 | -3.532 | -4.675 | -4.922 | -4.957 | -4.041 | -4.981 | -4.981 | 245555 | KIAA2022 | NM_001077354_X_-1  |

|         |        |        |        |        |        |        |        |        |        |        |        |         |                    |
|---------|--------|--------|--------|--------|--------|--------|--------|--------|--------|--------|--------|---------|--------------------|
| Git2    | -1.846 | -3.047 | -3.954 | -1.115 | -3.427 | -4.663 | -3.180 | -4.550 | -4.495 | -4.729 | 26431  | GIT2    | NM_001077359_5_-1  |
| Git2    | 3.867  | 4.391  | 4.756  | 4.797  | 4.932  | 4.824  | 4.984  | 4.651  | 4.870  | 4.935  | 26431  | GIT2    | NM_001077360_5_-1  |
| Fhl1    | -4.981 | -4.981 | -4.978 | -3.108 | -4.716 | -4.971 | -4.183 | -4.966 | -4.879 | -4.965 | 14199  | FHL1    | NM_001077361_X+1   |
| Fhl1    | -3.956 | -4.877 | -4.704 | -4.538 | -4.649 | -4.862 | -4.499 | -4.699 | -4.144 | -4.144 | 14199  | FHL1    | NM_001077362_X+1   |
| Ptbp1   | 5.285  | 5.128  | 5.645  | 5.959  | 5.542  | 5.668  | 5.326  | 5.685  | 5.528  | 5.778  | 19205  | PTBP1   | NM_001077363_10+1  |
| Tsc22d3 | -0.723 | -1.576 | 1.315  | 1.420  | 1.323  | 0.523  | 2.077  | 3.068  | 4.336  | 4.447  | 14605  | TSC22D3 | NM_001077364_X-1   |
| Ldb2    | -4.981 | -4.981 | -4.978 | -4.978 | -4.949 | -4.351 | -4.975 | -4.977 | -4.981 | -4.981 | 16826  | LDB2    | NM_001077398_5_-1  |
| Nrp2    | -4.981 | -3.499 | -4.311 | -3.727 | -2.452 | -4.304 | -0.747 | -1.672 | -0.682 | 0.015  | 18187  | NRP2    | NM_001077403_1+1   |
| Nrp2    | -4.981 | -3.421 | -4.149 | -3.465 | -1.904 | -3.802 | -0.661 | -0.521 | -0.343 | 0.599  | 18187  | NRP2    | NM_001077404_1+1   |
| Nrp2    | -4.981 | -2.304 | -1.972 | -1.608 | -2.367 | -2.870 | 0.121  | -0.779 | -0.922 | -0.261 | 18187  | NRP2    | NM_001077405_1+1   |
| Nrp2    | -4.186 | -4.981 | -2.414 | -1.330 | -1.716 | -2.128 | 0.082  | 0.608  | 1.026  | 1.183  | 18187  | NRP2    | NM_001077406_1+1   |
| Nrp2    | -4.076 | -4.981 | -1.813 | -0.236 | -0.080 | -1.015 | 0.982  | 0.547  | 0.950  | 2.008  | 18187  | NRP2    | NM_001077407_1+1   |
| Gimap8  | 0.853  | -0.484 | -4.529 | -1.557 | -2.813 | 0.728  | -1.425 | 1.309  | -2.577 | -2.107 | 243374 | GIMAP8  | NM_001077410_6+1   |
| Gba     | 7.179  | 7.236  | 6.607  | 6.857  | 6.388  | 6.574  | 6.542  | 6.624  | 6.493  | 6.373  | 14466  | GBA     | NM_001077411_3+1   |
| Pik3r1  | 5.275  | 5.321  | 6.038  | 6.118  | 5.948  | 6.009  | 5.388  | 5.367  | 4.922  | 5.005  | 18708  | PIK3R1  | NM_001077495_13_-1 |
| Evi2b   | 1.039  | 2.535  | 8.745  | 8.595  | 8.081  | 8.267  | 7.860  | 7.900  | 8.217  | 8.251  | 216984 | EV12B   | NM_001077496_11_-1 |
| Gnas    | -0.992 | -2.224 | -4.521 | -3.681 | -3.792 | -4.551 | -2.839 | -4.397 | -1.845 | -4.009 | 14683  | GNAS    | NM_001077507_2+1   |
| Tnfrsf9 | -0.449 | -0.343 | 1.578  | 1.611  | 2.400  | 2.067  | 0.453  | -0.327 | -4.981 | -2.306 | 21942  | TNFRSF9 | NM_001077508_4+1   |
| Tnfrsf9 | -4.845 | -2.207 | 1.590  | 1.570  | 3.169  | 2.212  | 1.577  | 0.376  | -2.989 | -4.819 | 21942  | TNFRSF9 | NM_001077509_4+1   |
| Gnas    | 9.316  | 9.257  | 7.852  | 8.199  | 7.457  | 7.510  | 7.397  | 8.043  | 8.346  | 8.458  | 14683  | GNAS    | NM_001077510_2+1   |
| Slc1a2  | -4.404 | -4.170 | -4.371 | -4.940 | -4.970 | -4.970 | -4.620 | -4.557 | -4.981 | -4.865 | 20511  | SLC1A2  | NM_001077514_2+1   |
| Slc1a2  | -1.134 | -1.905 | -4.973 | -4.236 | -4.814 | -4.721 | -1.932 | -0.863 | -4.981 | -3.033 | 20511  | SLC1A2  | NM_001077515_2+1   |
| Nme2    | 6.983  | 6.789  | 6.486  | 6.287  | 6.469  | 6.368  | 6.881  | 6.624  | 6.516  | 6.135  | 18103  | NME2    | NM_001077529_11_-1 |
| Shroom3 | -1.736 | -4.981 | -1.988 | -3.975 | -3.190 | -4.881 | -4.348 | -4.862 | -2.378 | -4.981 | 27428  | SHROOM3 | NM_001077595_5+1   |
| Shroom3 | -3.065 | -4.981 | -3.475 | -4.508 | -4.459 | -4.434 | -4.743 | -4.939 | -3.797 | -4.981 | 27428  | SHROOM3 | NM_001077596_5+1   |
| Vwa9    | 5.018  | 5.222  | 5.815  | 5.898  | 5.606  | 5.675  | 5.161  | 5.260  | 5.350  | 5.547  | 69882  | VWA9    | NM_001077631_9+1   |
| Pigw    | 1.314  | 0.319  | 1.457  | 0.906  | 0.352  | -0.389 | 0.825  | 0.846  | 1.020  | 1.243  | 70325  | PIGW    | NM_001077636_11_-1 |
| Prmt2   | 0.968  | 2.611  | 0.802  | 1.376  | -0.297 | 1.523  | 0.764  | -0.034 | -1.136 | 0.965  | 15468  | PRMT2   | NM_001077638_10_-1 |
| Urgcp   | 3.236  | 2.242  | 2.906  | 2.642  | 2.752  | 2.702  | 2.824  | 2.755  | 3.835  | 3.011  | 72046  | URGCP   | NM_001077661_11_-1 |
| Ccdc173 | 2.246  | 2.706  | -1.776 | -2.356 | 0.953  | 2.055  | -0.021 | -0.385 | -1.488 | -1.891 | 75051  | CCDC173 | NM_001077684_2_-1  |
| Lrba    | -0.073 | 0.811  | 0.665  | 1.033  | 1.581  | 0.331  | -1.667 | -1.595 | -0.184 | -1.573 | 80877  | LRBA    | NM_001077687_3+1   |
| Lrba    | -2.635 | -3.088 | 0.024  | -0.223 | 0.618  | -1.361 | -3.272 | -4.861 | -2.336 | 0.022  | 80877  | LRBA    | NM_001077688_3+1   |
| Dysf    | -4.565 | -4.415 | -4.918 | -4.961 | -4.893 | -4.961 | -4.883 | -4.878 | -4.981 | -4.877 | 26903  | DYSF    | NM_001077694_6+1   |
| Hdac5   | 3.607  | 3.843  | 2.500  | 2.226  | 2.421  | 2.907  | 3.183  | 3.704  | 5.051  | 4.769  | 15184  | HDAC5   | NM_001077696_11_-1 |
| Fmn1l   | 4.730  | 4.649  | 6.445  | 6.195  | 6.836  | 6.435  | 6.861  | 6.867  | 8.378  | 8.223  | 57778  | NA      | NM_001077698_11+1  |
| Ptpn6   | 3.044  | 2.282  | 2.857  | 3.030  | 3.028  | 2.594  | 2.171  | 1.257  | 2.930  | 2.024  | 15170  | PTPN6   | NM_001077705_6_-1  |
| Shprh   | 3.834  | 4.093  | 4.458  | 4.303  | 4.328  | 4.507  | 3.918  | 4.253  | 4.131  | 4.476  | 268281 | SHPRH   | NM_001077707_10+1  |
| Slc39a7 | 5.940  | 5.632  | 5.055  | 5.182  | 4.624  | 4.812  | 5.109  | 5.014  | 5.144  | 5.317  | 14977  | SLC39A7 | NM_001077709_17_-1 |
| Stag2   | 3.474  | 2.771  | 4.078  | 3.954  | 3.946  | 3.137  | 2.987  | 3.256  | 2.861  | 3.454  | 20843  | STAG2   | NM_001077712_X+1   |
| Sdhaf3  | 3.146  | 3.091  | 2.350  | 2.266  | 2.159  | 2.425  | 2.073  | 1.991  | 0.844  | 1.036  | 71238  | SDHAF3  | NM_001077713_6+1   |
| Srsf1   | 5.809  | 5.528  | 5.588  | 5.389  | 6.070  | 6.128  | 5.829  | 5.825  | 5.097  | 5.623  | 110809 | SRSF1   | NM_001078167_11+1  |
| Henmt1  | -4.981 | -2.681 | 0.364  | 0.458  | -4.832 | -2.874 | -3.700 | -4.391 | -4.394 | -4.981 | 66715  | HENMT1  | NM_001078646_3+1   |
| Tmem134 | 7.243  | 6.890  | 6.947  | 6.753  | 6.586  | 6.442  | 6.747  | 6.425  | 6.257  | 5.701  | 66990  | TMEM134 | NM_001078649_19+1  |
| Zbtb33  | 1.982  | 1.504  | 1.163  | 1.393  | 1.796  | -0.031 | 0.825  | -0.040 | 1.167  | 1.736  | 56805  | ZBTB33  | NM_001079513_X+1   |
| Syne1   | 1.783  | 1.940  | 6.041  | 5.670  | 4.502  | 4.523  | 3.959  | 3.296  | 2.456  | 1.610  | 64009  | SYNE1   | NM_001079686_10_-1 |
| Slc12a1 | -4.981 | -4.981 | -4.971 | -3.398 | -4.981 | -4.981 | -4.935 | -4.700 | -4.981 | -4.981 | 20495  | SLC12A1 | NM_001079690_2+1   |
| Srsf5   | 8.882  | 9.114  | 8.429  | 8.581  | 8.678  | 8.950  | 8.288  | 8.616  | 8.377  | 8.487  | 20384  | NA      | NM_001079694_12+1  |
| Srsf5   | 7.234  | 7.385  | 6.046  | 6.109  | 6.599  | 6.698  | 6.479  | 6.461  | 6.608  | 6.386  | 20384  | NA      | NM_001079695_12+1  |
| Glyr1   | 5.173  | 5.156  | 6.124  | 5.989  | 6.174  | 5.857  | 6.310  | 6.200  | 7.103  | 7.022  | 74022  | GLYR1   | NM_001079814_16_-1 |
| Tcf7l1  | -4.981 | -4.981 | -3.361 | -4.044 | -1.945 | -3.819 | -3.252 | -4.543 | -4.421 | -4.639 | 21415  | TCF7L1  | NM_001079822_6_-1  |
| Hnrnp33 | 5.616  | 5.651  | 4.915  | 5.090  | 5.697  | 5.898  | 4.940  | 4.664  | 3.418  | 3.752  | 432467 | HNRNP33 | NM_001079824_10_-1 |
| Trim33  | 4.398  | 2.341  | 3.461  | 3.244  | 3.779  | 3.123  | 3.164  | 2.669  | 3.299  | 2.810  | 94093  | TRIM33  | NM_001079830_3+1   |
| Gpc6    | -3.505 | -4.981 | -4.065 | -4.567 | -4.872 | -4.739 | -4.201 | -4.471 | -3.778 | -4.981 | 23888  | GPC6    | NM_001079844_14+1  |
| Adgrg2  | -3.938 | -4.981 | -4.723 | -4.645 | -4.960 | -4.972 | -4.903 | -4.867 | -4.666 | -4.981 | 237175 | ADGRG2  | NM_001079847_X+1   |
| Adgrg2  | -3.344 | -4.981 | -4.585 | -4.236 | -4.934 | -4.955 | -4.863 | -4.532 | -4.548 | -4.981 | 237175 | ADGRG2  | NM_001079848_X+1   |
| Paip1   | 3.220  | 2.861  | 2.452  | 1.600  | 1.894  | 1.253  | 1.206  | -0.128 | -0.135 | 1.394  | 218693 | PAIP1   | NM_001079849_13+1  |
| Adgrg2  | -4.008 | -4.981 | -4.752 | -4.682 | -4.967 | -4.976 | -4.914 | -4.926 | -4.697 | -4.981 | 237175 | ADGRG2  | NM_001079857_X+1   |
| Hoxb3   | -4.981 | -3.479 | -4.907 | -4.957 | -4.596 | -4.952 | -4.762 | -4.838 | -2.234 | -4.303 | 15410  | HOXB3   | NM_001079869_11+1  |
| Gas2l3  | -1.290 | 3.218  | 2.086  | 1.051  | -1.104 | -2.414 | 1.501  | 0.654  | 1.831  | 2.421  | 237436 | GAS2L3  | NM_001079876_10_-1 |
| Bcl11b  | -4.643 | -4.402 | -4.975 | -1.428 | -4.920 | -4.943 | -0.931 | -0.730 | -4.346 | -1.270 | 58208  | BCL11B  | NM_001079883_12_-1 |
| Repin1  | -3.582 | -0.065 | -0.861 | 0.937  | -2.729 | 0.621  | -3.036 | -0.444 | 1.804  | 1.704  | 58887  | REPIN1  | NM_001079901_6+1   |
| Repin1  | -0.371 | -1.420 | 1.284  | -1.642 | -2.651 | 0.923  | -1.214 | -1.845 | 0.256  | 1.116  | 58887  | REPIN1  | NM_001079902_6+1   |
| Repin1  | 0.335  | -1.140 | -1.105 | 0.484  | -3.201 | -1.035 | -1.692 | 0.290  | 2.095  | 0.310  | 58887  | REPIN1  | NM_001079903_6+1   |
| Repin1  | -4.659 | -3.861 | -2.429 | -2.159 | -1.413 | -2.306 | -1.675 | 0.151  | -0.639 | 0.199  | 58887  | REPIN1  | NM_001079904_6+1   |
| Repin1  | -4.314 | -0.948 | -0.988 | -3.042 | -2.359 | -0.629 | -0.312 | -0.903 | -2.388 | -4.579 | 58887  | REPIN1  | NM_001079905_6+1   |
| Fgfr1   | 0.975  | 1.624  | 1.712  | -2.274 | 0.115  | 1.119  | 0.597  | 1.045  | -2.043 | -4.899 | 14182  | FGFR1   | NM_001079908_8+1   |
| Fgfr1   | 3.732  | 3.274  | 3.374  | 2.462  | 1.552  | 2.601  | 2.756  | 3.536  | -0.627 | -2.066 | 14182  | FGFR1   | NM_001079909_8+1   |
| Ccdc154 | -4.981 | -4.981 | -4.954 | -4.378 | -4.480 | -4.954 | -4.960 | -4.971 | -1.195 | -4.227 | 207209 | CCDC154 | NM_001079929_17+1  |
| Trim72  | -3.668 | -4.981 | -4.981 | -3.971 | -4.973 | -4.949 | -3.534 | -3.142 | -4.981 | -2.750 | 434246 | TRIM72  | NM_001079932_7+1   |
| Med1    | 1.740  | 2.704  | 3.691  | 4.660  | 3.245  | 4.538  | 2.140  | 3.489  | 3.659  | 4.379  | 19014  | MED1    | NM_001080118_11_-1 |
| Casp8   | 5.240  | 5.579  | 3.067  | 3.156  | 3.576  | 4.006  | 3.940  | 4.328  | 4.788  | 4.903  | 12370  | CASP8   | NM_001080126_1+1   |
| Rnps1   | 4.298  | 3.599  | 3.900  | 4.025  | 3.374  | 3.940  | 3.306  | 3.480  | 2.874  | 3.038  | 19826  | RNPS1   | NM_001080127_17+1  |
| Rnps1   | 6.008  | 5.552  | 6.291  | 5.609  | 6.536  | 5.612  | 6.239  | 5.334  | 6.087  | 4.871  | 19826  | RNPS1   | NM_001080128_17+1  |
| Tmpo    | 5.570  | 5.606  | 7.791  | 8.004  | 7.850  | 7.895  | 7.317  | 7.485  | 8.265  | 8.553  | 21917  | TMPO    | NM_001080129_10_-1 |

|               |        |        |        |        |        |        |        |        |        |        |           |           |                    |
|---------------|--------|--------|--------|--------|--------|--------|--------|--------|--------|--------|-----------|-----------|--------------------|
| Tmpo          | 1.553  | 2.836  | 4.683  | 4.295  | 4.716  | 4.367  | 4.214  | 4.209  | 4.048  | 5.144  | 21917     | TMPO      | NM_001080130_10_-1 |
| Tmpo          | 0.556  | 0.356  | 2.500  | 2.553  | 2.644  | 1.831  | 2.499  | 1.560  | 2.370  | 3.977  | 21917     | TMPO      | NM_001080131_10_-1 |
| Tmpo          | 1.858  | 2.138  | 3.512  | 3.365  | 3.210  | 3.514  | 3.557  | 2.875  | 3.262  | 3.921  | 21917     | TMPO      | NM_001080132_10_-1 |
| Cenpm         | 0.875  | -0.020 | 0.558  | 0.472  | 1.840  | 1.163  | 0.991  | -0.420 | 0.157  | -2.324 | 66570     | CENPM     | NM_001080158_15_-1 |
| Fam65b        | -3.848 | -4.244 | -3.945 | -4.868 | -4.980 | -4.981 | -4.981 | -4.981 | -4.981 | -4.981 | 193385    | FAM65B    | NM_001080381_13_+1 |
| Clta          | 7.396  | 7.457  | 7.385  | 7.609  | 7.068  | 7.202  | 7.080  | 7.176  | 7.139  | 7.060  | 12757     | CLTA      | NM_001080384_4_+1  |
| Clta          | -2.121 | -1.794 | -4.098 | -2.213 | -4.657 | -2.347 | -3.962 | -4.909 | -4.981 | -4.759 | 12757     | CLTA      | NM_001080385_4_+1  |
| Clta          | 3.636  | 3.476  | 3.620  | 3.818  | 2.786  | 3.104  | 3.094  | 3.022  | 2.763  | 2.792  | 12757     | CLTA      | NM_001080386_4_+1  |
| Srsf10        | 5.120  | 5.489  | 5.692  | 5.576  | 5.753  | 5.586  | 5.788  | 5.494  | 5.072  | 5.315  | 14105     | SRSF10    | NM_001080387_4_+1  |
| Mark2         | 3.152  | 3.220  | 4.031  | 4.474  | 4.721  | 4.178  | 4.381  | 4.367  | 5.649  | 5.640  | 13728     | MARK2     | NM_001080388_19_-1 |
| Mark2         | 1.315  | 2.593  | 2.175  | 1.975  | 1.938  | 3.135  | 3.057  | 2.610  | 2.922  | 2.733  | 13728     | MARK2     | NM_001080389_19_-1 |
| Mark2         | 2.681  | 2.119  | 1.235  | 2.649  | 3.142  | 3.429  | 1.875  | 1.974  | 3.027  | 2.830  | 13728     | MARK2     | NM_001080390_19_-1 |
| Usp6nl        | 3.046  | 2.866  | 4.388  | 4.570  | 5.608  | 5.614  | 4.702  | 4.376  | 4.305  | 4.461  | 98910     | USP6NL    | NM_001080548_2_+1  |
| Gsg1          | 0.549  | -0.048 | 1.990  | -0.328 | 3.707  | 2.880  | 3.260  | 1.078  | -3.823 | 0.846  | 14840     | GSG1      | NM_001080552_6_-1  |
| Gsg1          | -4.668 | -4.470 | -4.783 | -4.934 | -4.919 | -4.964 | -4.765 | -4.945 | -4.944 | -4.927 | 14840     | GSG1      | NM_001080553_6_-1  |
| Vamp1         | 3.160  | 3.236  | 2.383  | 2.463  | 2.723  | 2.857  | 2.584  | 2.490  | 3.769  | 3.835  | 22317     | VAMP1     | NM_001080557_6_+1  |
| Btaf1         | 4.623  | 4.746  | 5.279  | 5.121  | 5.437  | 5.265  | 5.062  | 5.091  | 4.950  | 5.166  | 107182    | BTA1F1    | NM_001080706_19_+1 |
| Fam65c        | -4.981 | -2.600 | -4.977 | -4.425 | -4.970 | -4.970 | -4.888 | -4.533 | -4.981 | -4.981 | 69553     | FAM65C    | NM_001080708_2_-1  |
| Dfnb59        | 0.028  | -0.918 | 1.550  | 0.881  | -3.153 | -2.672 | -2.735 | -4.311 | -1.536 | -3.098 | 381375    | DFNB59    | NM_001080711_2_+1  |
| Vamp5         | -2.833 | -4.981 | -0.806 | -1.371 | -0.687 | -0.505 | -0.540 | -1.043 | -2.355 | -2.342 | 53620     | VAMP5     | NM_001080742_6_-1  |
| Grk4          | 1.073  | 0.934  | 1.479  | 1.311  | 1.307  | 1.091  | 0.944  | 1.084  | 0.924  | 2.020  | 14772     | GRK4      | NM_001080743_5_+1  |
| Gtf2i         | -2.486 | 2.039  | -1.952 | -1.436 | -3.056 | -2.344 | -1.842 | -2.033 | -3.985 | -4.278 | 14886     | GTF2I     | NM_001080746_5_-1  |
| Gtf2i         | -0.058 | -2.439 | -1.977 | -1.719 | -0.981 | -0.561 | -2.943 | -3.700 | -3.844 | -4.233 | 14886     | GTF2I     | NM_001080747_5_-1  |
| Gtf2i         | 3.770  | 0.034  | 1.191  | 2.495  | 1.002  | 1.327  | 1.527  | 2.406  | 1.247  | 0.224  | 14886     | GTF2I     | NM_001080748_5_-1  |
| Gtf2i         | 4.317  | 4.075  | 2.763  | 2.851  | 1.791  | 2.430  | 2.944  | 3.513  | 3.092  | 2.808  | 14886     | GTF2I     | NM_001080749_5_-1  |
| Ambra1        | 3.536  | 3.429  | 4.734  | 4.548  | 4.795  | 4.685  | 4.355  | 4.065  | 4.940  | 4.843  | 228361    | AMBRA1    | NM_001080754_2_+1  |
| Zzz3          | 4.556  | 4.434  | 5.006  | 4.878  | 4.812  | 4.713  | 4.806  | 4.835  | 4.839  | 5.204  | 108946    | ZZZ3      | NM_001080755_3_+1  |
| Uhrf1bp1      | 1.077  | 2.112  | 2.253  | 2.287  | 1.683  | 1.021  | 2.155  | 1.742  | 2.961  | 2.718  | 224648    | UHRF1BP1  | NM_001080769_17_+1 |
| Pdpk1         | 3.286  | 3.862  | 2.403  | 2.743  | 3.030  | 2.747  | 1.131  | 2.180  | 1.525  | 1.029  | 18607     | PDPK1     | NM_001080773_17_-1 |
| Myo1c         | 4.215  | 3.877  | 3.713  | 4.079  | 4.694  | 4.359  | 4.494  | 3.861  | 4.582  | 3.835  | 17913     | MYO1C     | NM_001080774_11_+1 |
| Myo1c         | 1.916  | 2.093  | 3.072  | 3.087  | 2.255  | 2.562  | 3.679  | 4.214  | 5.754  | 5.940  | 17913     | MYO1C     | NM_001080775_11_+1 |
| Gm1123        | -1.403 | -2.681 | -4.422 | -3.475 | -2.897 | -3.920 | -3.563 | -2.154 | -1.872 | -0.822 | 382097    | NA        | NM_001080776_9_-1  |
| Ret           | -4.981 | -4.981 | -3.508 | -3.889 | 1.481  | 2.022  | 0.081  | -0.443 | -3.750 | -3.459 | 19713     | RET       | NM_001080780_6_-1  |
| Ash2l         | -2.792 | -2.625 | -3.642 | -2.753 | -1.090 | -1.847 | -2.835 | -0.844 | -3.553 | 1.231  | 23808     | ASH2L     | NM_001080793_8_-1  |
| G3bp2         | -0.192 | -1.349 | -0.133 | 0.017  | -0.651 | -0.971 | -1.062 | -0.690 | 0.711  | -0.268 | 23881     | G3BP2     | NM_001080794_5_-1  |
| G3bp2         | 6.366  | 6.287  | 7.290  | 7.236  | 6.738  | 6.709  | 6.896  | 6.981  | 7.537  | 7.731  | 23881     | G3BP2     | NM_001080795_5_-1  |
| G3bp2         | 2.643  | 1.745  | 3.371  | 2.958  | 2.521  | 1.980  | 1.931  | 2.590  | 3.716  | 2.515  | 23881     | G3BP2     | NM_001080796_5_-1  |
| G3bp2         | 0.938  | 0.700  | 1.029  | -2.022 | 1.326  | 0.276  | 0.406  | -0.015 | 0.269  | 0.988  | 23881     | G3BP2     | NM_001080797_5_-1  |
| Aff1          | 2.244  | 2.667  | 3.905  | 3.294  | 0.248  | 1.085  | 0.612  | 1.177  | 0.789  | 0.649  | 17355     | AFF1      | NM_001080798_5_+1  |
| Ccdc64        | -1.857 | -2.087 | -2.860 | -2.335 | -1.593 | -2.586 | -4.188 | -2.463 | -1.374 | -2.895 | 75665     | BICDL1    | NM_001080808_5_-1  |
| Bpifa6        | -4.981 | -4.981 | -4.280 | -2.284 | 0.971  | 2.081  | -1.100 | -2.645 | -4.981 | -4.981 | 545477    | NA        | NM_001080811_2_+1  |
| Cib3          | -1.275 | -4.981 | -4.447 | -4.515 | -1.188 | -1.605 | -2.278 | -4.420 | -3.461 | -3.449 | 234421    | CIB3      | NM_001080812_8_-1  |
| Rab11fip1     | 0.283  | -4.981 | 4.601  | 4.204  | 3.158  | 3.123  | 2.666  | 2.715  | 3.589  | 3.317  | 75767     | RAB11FIP1 | NM_001080813_8_-1  |
| Fat3          | -4.981 | -1.991 | -2.305 | -1.060 | -4.204 | -2.092 | -3.884 | -4.789 | -4.190 | -4.981 | 270120    | FAT3      | NM_001080814_9_-1  |
| Prdm10        | -0.561 | -0.816 | 0.055  | 0.101  | 0.649  | 0.325  | -0.028 | 0.103  | 1.705  | 1.754  | 382066    | PRDM10    | NM_001080817_9_+1  |
| Cdc14a        | 3.253  | 5.479  | 5.686  | 4.992  | 5.549  | 5.127  | 4.899  | 4.364  | 4.144  | 3.782  | 229776    | CDC14A    | NM_001080818_3_-1  |
| Arid1a        | 6.226  | 6.433  | 6.174  | 6.323  | 6.888  | 6.777  | 6.665  | 6.485  | 6.131  | 6.366  | 93760     | ARID1A    | NM_001080819_4_-1  |
| Cass4         | -0.353 | -3.113 | -1.509 | -3.015 | 3.070  | 2.386  | 1.940  | 1.720  | 2.342  | 2.103  | 320664    | CASS4     | NM_001080820_2_+1  |
| Znrf3         | 1.861  | 0.972  | -0.998 | -1.452 | -0.639 | -1.713 | -0.725 | 1.117  | -0.767 | -1.689 | 407821    | ZNRF3     | NM_001080924_11_-1 |
| Rapgef1l      | -0.735 | -0.611 | -1.688 | -2.750 | -1.421 | -3.548 | -2.131 | -1.400 | -0.631 | -0.824 | 268480    | RAPGEFL1  | NM_001080925_11_+1 |
| Lrp8          | 7.493  | 6.830  | 0.647  | 0.897  | 4.805  | 5.249  | 3.685  | 3.495  | 2.033  | 2.670  | 16975     | LRP8      | NM_001080926_4_+1  |
| Rbpj          | 3.474  | 3.090  | 6.055  | 5.452  | 4.868  | 4.525  | 5.385  | 4.573  | 5.462  | 4.925  | 19664     | RBPJ      | NM_001080927_5_+1  |
| Rbpj          | -3.826 | -3.991 | -1.369 | -3.326 | -1.194 | -4.619 | -0.647 | -2.010 | 3.118  | 1.663  | 19664     | RBPJ      | NM_001080928_5_+1  |
| Cdr2l         | -2.105 | -3.267 | -1.163 | -1.148 | -3.203 | -2.839 | -1.979 | -1.419 | -1.057 | -2.015 | 237988    | CDR2L     | NM_001080929_11_+1 |
| Atxn1l        | 1.991  | 2.155  | 2.791  | 2.832  | 2.475  | 2.426  | 2.552  | 2.110  | 2.961  | 3.024  | 52335     | ATXN1L    | NM_001080930_8_-1  |
| Med13         | 5.740  | 5.491  | 5.656  | 5.373  | 5.853  | 5.626  | 5.482  | 5.322  | 5.059  | 5.315  | 327987    | MED13     | NM_001080931_11_-1 |
| Foxk2         | 3.444  | 3.415  | 4.249  | 4.178  | 4.442  | 4.168  | 4.209  | 3.834  | 4.293  | 4.396  | 68837     | FOXK2     | NM_001080932_11_+1 |
| Slc16a5       | -4.981 | -1.693 | -3.184 | -3.131 | -3.634 | -3.391 | -2.908 | -0.945 | -4.981 | -1.689 | 217316    | SLC16A5   | NM_001080934_11_+1 |
| B230217C12Rik | 2.682  | 0.480  | 4.326  | 3.900  | 5.119  | 4.912  | 4.481  | 3.050  | -0.088 | -1.037 | 68127     | NA        | NM_001080935_11_+1 |
|               | 3.807  | 3.981  | 3.891  | 3.653  | 3.835  | 4.017  | 3.724  | 3.976  | 3.615  | 3.923  | 72807     | NA        | NM_001080941_13_-1 |
| Atp8b4        | -1.316 | -0.678 | 4.096  | 4.300  | 5.606  | 5.499  | 5.353  | 5.316  | 6.847  | 6.795  | 241633    | ATP8B4    | NM_001080944_2_-1  |
| Larp4         | -3.464 | -3.304 | -2.753 | -4.339 | -3.526 | -4.675 | -3.796 | -4.824 | -0.713 | -0.971 | 207214    | LARP4     | NM_001080948_15_+1 |
| Ttc5          | 6.231  | 6.367  | 6.186  | 6.398  | 6.286  | 6.538  | 6.058  | 6.057  | 5.658  | 5.737  | 219022    | TTC5      | NM_001080949_14_-1 |
| Sp2           | 2.312  | 2.319  | 3.647  | 2.468  | 3.947  | 3.183  | 3.743  | 3.609  | 5.074  | 4.799  | 78912     | SP2       | NM_001080964_11_-1 |
| Aurkc         | -4.981 | -3.315 | -4.589 | -3.559 | -4.268 | -4.967 | -4.556 | -4.925 | -3.925 | -2.943 | 20871     | AURKC     | NM_001080965_7_+1  |
| Aurkc         | -4.981 | -4.981 | -4.981 | -4.981 | -4.981 | -4.981 | -4.981 | -4.981 | -4.981 | -4.981 | 20871     | AURKC     | NM_001080966_7_+1  |
| Tmsb15b2      | -2.016 | -4.981 | -4.922 | -2.623 | -4.097 | -4.131 | -4.579 | -4.970 | -2.664 | -4.981 | 100034363 | NA        | NM_001080967_X_-1  |
| Golga2        | 4.328  | 4.396  | 4.125  | 3.932  | 4.075  | 3.547  | 3.690  | 3.432  | 4.372  | 4.051  | 99412     | GOLGA2    | NM_001080968_2_+1  |
| Thg1l         | 2.434  | 4.267  | 2.697  | 4.483  | 1.767  | 3.666  | 1.440  | 3.450  | 1.447  | 2.432  | 66628     | THG1L     | NM_001080969_11_-1 |
| Tubb1         | -0.181 | -4.981 | -0.741 | -0.266 | 0.095  | -0.631 | 0.021  | -1.386 | 2.554  | 2.031  | 545486    | TUBB1     | NM_001080971_2_+1  |
| Sri           | 9.046  | 8.766  | 8.791  | 8.590  | 8.990  | 8.895  | 8.773  | 8.489  | 7.889  | 7.696  | 109552    | SRI       | NM_001080974_5_+1  |
| Rsbnl1        | 5.544  | 5.288  | 4.838  | 4.639  | 5.050  | 5.197  | 4.952  | 4.515  | 3.946  | 4.048  | 242860    | RSBN1L    | NM_001080977_5_-1  |
| Ddx23         | 2.819  | 2.570  | 3.173  | 3.053  | 2.863  | 2.913  | 2.372  | 2.420  | 1.960  | 1.953  | 74351     | DDX23     | NM_001080981_15_-1 |
| Ddias         | 1.267  | 1.419  | 0.803  | 1.610  | 1.635  | 0.884  | 0.962  | 1.138  | 0.448  | 0.534  | 74041     | DDIAS     | NM_001080995_7_-1  |

|                |        |        |        |        |        |        |        |        |        |        |               |          |                     |
|----------------|--------|--------|--------|--------|--------|--------|--------|--------|--------|--------|---------------|----------|---------------------|
| Trmt2a         | 6.519  | 6.804  | 6.097  | 6.105  | 6.307  | 6.238  | 6.029  | 5.924  | 5.598  | 5.625  | 15547         | TRMT2A   | NM_001080999_16_+_1 |
| Trmt2a         | 4.054  | 4.138  | 2.664  | 2.368  | 3.295  | 2.201  | 2.305  | 2.136  | 1.744  | 1.990  | 15547         | TRMT2A   | NM_001081000_16_+_1 |
| Brca2          | -0.938 | -0.396 | 0.149  | 1.487  | 1.828  | 1.778  | 0.808  | -0.264 | -3.436 | -3.044 | 12190         | BRC2A    | NM_001081001_5_+_1  |
| Record_removed | 4.936  | 4.704  | 5.471  | 5.297  | 4.718  | 4.399  | 5.596  | 5.174  | 4.682  | 4.512  | Record_remove | NA       | NM_001081005_2_+_1  |
| Etl4           | -4.981 | -4.981 | -4.958 | -4.891 | -4.979 | -4.818 | -4.951 | -4.476 | -4.981 | -1.590 | 208618        | KIAA1217 | NM_001081006_2_+_1  |
| Zfp382         | 1.916  | 2.168  | 2.447  | 2.043  | 3.039  | 2.257  | 1.770  | 1.855  | 1.322  | 1.684  | 233060        | ZNF382   | NM_001081007_7_+_1  |
| Parp8          | 5.431  | 5.507  | 6.606  | 7.166  | 6.086  | 5.790  | 5.887  | 5.684  | 5.889  | 5.666  | 52552         | PARP8    | NM_001081009_13_+_1 |
| Srgap2         | 3.844  | 3.152  | 5.164  | 5.014  | 3.946  | 3.520  | 4.707  | 4.992  | 6.141  | 6.267  | 14270         | SRGAP2   | NM_001081011_1_+_1  |
| Ccdc171        | 3.140  | 3.004  | 3.619  | 3.525  | 3.426  | 3.552  | 2.851  | 2.708  | 2.358  | 2.170  | 320226        | CCDC171  | NM_001081012_4_+_1  |
| Rlf            | 4.235  | 4.505  | 4.354  | 4.366  | 4.615  | 4.591  | 4.284  | 4.040  | 4.748  | 4.643  | 109263        | RLF      | NM_001081013_4_+_1  |
| Zc3h7b         | 2.039  | 1.695  | 1.949  | 1.508  | 2.404  | 2.218  | 2.006  | 1.310  | 0.353  | 0.283  | 20286         | ZC3H7B   | NM_001081016_15_+_1 |
| Gm12657        | 2.070  | 2.092  | 2.245  | 1.929  | 2.592  | 2.553  | 2.462  | 1.977  | 2.189  | 1.941  | 667250        | H3F3C    | NM_001081019_4_+_1  |
| Adamts6        | 0.449  | 0.763  | -0.378 | -0.525 | -0.334 | -1.252 | -1.619 | -0.493 | 1.063  | 1.129  | 108154        | ADAMTS6  | NM_001081020_13_+_1 |
| Zfp780b        | 2.392  | 2.794  | 2.101  | 1.972  | 2.593  | 2.608  | 2.685  | 2.196  | 2.470  | 2.822  | 338354        | ZNF780B  | NM_001081021_7_+_1  |
| D430042009Rik  | 1.550  | -0.182 | 2.036  | 1.512  | 1.634  | 1.564  | 1.193  | 1.587  | 2.978  | 2.612  | 233865        | KIAA0556 | NM_001081022_7_+_1  |
| Cacna1s        | 0.598  | 0.332  | -0.983 | -0.213 | 0.501  | -0.061 | -2.366 | -3.466 | -4.633 | -4.981 | 12292         | CACNA1S  | NM_001081023_1_+_1  |
| Record_removed | 4.135  | 4.202  | 5.196  | 4.953  | 5.322  | 4.648  | 5.412  | 4.930  | 5.327  | 4.970  | Record_remove | NA       | NM_001081024_14_+_1 |
| Sipa1l3        | 0.754  | 0.307  | 4.102  | 3.978  | 3.830  | 3.467  | 3.928  | 3.744  | 4.652  | 4.683  | 74206         | SIPA1L3  | NM_001081028_7_+_1  |
| Tmem243        | 5.402  | 4.476  | 5.986  | 5.866  | 5.230  | 5.126  | 5.647  | 5.856  | 6.136  | 5.716  | 652925        | TMEM243  | NM_001081029_5_+_1  |
| Sbf1           | 4.563  | 4.357  | 5.579  | 5.273  | 5.602  | 5.680  | 4.797  | 4.309  | 2.975  | 2.222  | 77980         | SBF1     | NM_001081030_15_+_1 |
| Gm8909         | -0.117 | -0.471 | -0.122 | -0.063 | -0.095 | -1.211 | -0.524 | -1.768 | -0.419 | -1.254 | 667977        | HLA-A    | NM_001081032_17_+_1 |
| Pde11a         | -4.981 | -4.981 | -4.763 | -2.720 | -4.975 | -4.975 | -4.972 | -4.249 | -4.981 | -4.981 | 241489        | PDE11A   | NM_001081033_2_+_1  |
| Fbxo11         | 5.167  | 4.888  | 4.681  | 4.478  | 4.878  | 4.799  | 4.600  | 3.894  | 3.667  | 4.072  | 225055        | FBXO11   | NM_001081034_17_+_1 |
| Srgap1         | -3.483 | -3.776 | -4.144 | -4.573 | -4.688 | -4.795 | -4.333 | -4.657 | -4.981 | -3.544 | 117600        | SRGAP1   | NM_001081037_10_+_1 |
| Btdb16         | 0.347  | 1.338  | -1.094 | -1.246 | 1.520  | 1.843  | 0.822  | -0.053 | -4.981 | -3.311 | 330660        | BTBD16   | NM_001081038_7_+_1  |
| Dock9          | -3.073 | -3.565 | -3.544 | -2.769 | -2.703 | -3.535 | -1.904 | -2.376 | -4.306 | -4.320 | 105445        | DOCK9    | NM_001081039_14_+_1 |
| Coq10a         | 4.759  | 4.478  | 3.845  | 3.595  | 3.739  | 3.911  | 3.866  | 3.910  | 4.514  | 4.342  | 210582        | COQ10A   | NM_001081040_10_+_1 |
| Vps51          | 5.391  | 5.409  | 5.630  | 5.416  | 5.211  | 5.185  | 5.423  | 5.440  | 6.376  | 6.290  | 68505         | VPS51    | NM_001081041_19_+_1 |
| Ptpn23         | 2.949  | 2.966  | 3.376  | 3.300  | 3.338  | 3.275  | 2.909  | 2.815  | 2.122  | 2.150  | 104831        | PTPN23   | NM_001081043_9_+_1  |
| Kansl1         | 4.679  | 4.478  | 5.088  | 5.039  | 5.542  | 5.479  | 5.511  | 5.346  | 6.039  | 6.110  | 76719         | KANSL1   | NM_001081045_11_+_1 |
| Efcab3         | -4.981 | -4.981 | -3.846 | -4.638 | -4.968 | -4.881 | -4.968 | -4.975 | -4.981 | -4.981 | 70894         | EFCAB3   | NM_001081046_11_+_1 |
| Cnksr1         | -4.981 | -4.981 | -3.397 | -4.957 | -4.884 | -4.964 | -3.974 | -2.712 | -4.981 | -4.981 | 194231        | CNKSRI   | NM_001081047_4_+_1  |
| Kmt2a          | 5.044  | 4.754  | 5.550  | 5.397  | 5.786  | 5.707  | 5.279  | 5.144  | 4.703  | 4.757  | 214162        | KMT2A    | NM_001081049_9_+_1  |
| Pard3b         | -3.843 | -0.149 | -1.576 | -0.878 | 2.726  | 1.122  | 0.203  | -0.364 | -0.734 | -1.056 | 72823         | PARD3B   | NM_001081050_1_+_1  |
| Nhs            | -4.009 | -4.981 | -4.981 | -4.981 | -4.961 | -4.692 | -4.873 | -4.323 | -4.981 | -3.330 | 195727        | NHS      | NM_001081052_X_+_1  |
| Qrsl1          | 4.507  | 4.939  | 4.116  | 4.211  | 4.270  | 4.101  | 3.623  | 3.771  | 3.451  | 2.941  | 76563         | QRL1     | NM_001081054_10_+_1 |
| Trappc10       | 4.390  | 4.368  | 4.240  | 4.144  | 4.482  | 4.598  | 4.926  | 4.494  | 4.914  | 4.906  | 216131        | TRAPPC10 | NM_001081055_10_+_1 |
| Xpot           | 3.396  | 3.345  | 4.254  | 4.268  | 4.636  | 4.568  | 4.530  | 4.459  | 4.881  | 4.933  | 73192         | XPOT     | NM_001081056_10_+_1 |
| Tecpr2         | -1.679 | -1.266 | 0.325  | 0.033  | -0.797 | -1.278 | -0.452 | -1.457 | 0.492  | 0.789  | 104859        | TECP2    | NM_001081057_12_+_1 |
| Cdk13          | 1.263  | 2.620  | 2.463  | 2.080  | 2.651  | 2.749  | 1.798  | 2.090  | 3.644  | 2.807  | 69562         | CDK13    | NM_001081058_13_+_1 |
| Mcur1          | 5.064  | 4.950  | 5.852  | 5.608  | 5.791  | 5.702  | 5.914  | 5.799  | 6.366  | 6.389  | 76137         | MCUR1    | NM_001081059_13_+_1 |
| Bdp1           | 4.969  | 5.054  | 5.119  | 5.061  | 5.281  | 5.307  | 5.182  | 4.865  | 4.408  | 4.549  | 544971        | BDP1     | NM_001081061_13_+_1 |
| Ccno           | -3.563 | -2.583 | -4.125 | -4.285 | -4.379 | -4.278 | -3.801 | -3.080 | -0.565 | -0.837 | 218630        | CENO     | NM_001081062_13_+_1 |
| Pdzd2          | 0.730  | 0.994  | 0.750  | 1.073  | -0.468 | 0.055  | -0.142 | -1.121 | -0.028 | 0.277  | 68070         | PDZD2    | NM_001081064_15_+_1 |
| Zfp707         | 3.548  | 3.370  | 2.183  | 2.176  | 2.782  | 2.975  | 2.659  | 2.286  | 2.509  | 2.755  | 69020         | ZNF707   | NM_001081065_15_+_1 |
| Dennd3         | 3.728  | 2.513  | 4.315  | 3.655  | 6.882  | 6.516  | 5.537  | 4.557  | 3.189  | 4.413  | 105841        | DENND3   | NM_001081066_15_+_1 |
| Ltn1           | 4.868  | 5.102  | 5.102  | 4.860  | 4.980  | 4.859  | 4.883  | 4.840  | 5.356  | 5.412  | 78913         | LTN1     | NM_001081068_16_+_1 |
| Rgs11          | -3.668 | -2.137 | 1.595  | 2.360  | 2.512  | 2.956  | 1.480  | 0.681  | -1.134 | -2.243 | 50782         | RGS11    | NM_001081069_17_+_1 |
| Pdia2          | -3.090 | -4.981 | -3.403 | -1.084 | -3.601 | -0.443 | -2.894 | -0.780 | -4.394 | -3.510 | 69191         | PDIA2    | NM_001081070_17_+_1 |
| Lclat1         | 1.370  | 1.836  | 0.886  | 0.809  | -0.975 | 0.641  | 0.616  | 0.401  | 0.139  | 1.522  | 225010        | LCLAT1   | NM_001081071_17_+_1 |
| Cep76          | 1.411  | 1.731  | 2.026  | 2.624  | 2.394  | 2.536  | 2.254  | 2.964  | 2.629  | 3.105  | 225659        | CEP76    | NM_001081073_18_+_1 |
| Fra10ac1       | 4.941  | 5.179  | 3.984  | 4.139  | 4.390  | 4.203  | 4.287  | 3.890  | 2.848  | 2.976  | 70567         | FRA10AC1 | NM_001081075_19_+_1 |
| Gucy2g         | -4.981 | -4.981 | -4.908 | -1.069 | -4.971 | -4.971 | -4.753 | -4.564 | -4.981 | -4.981 | 73707         | NA       | NM_001081076_19_+_1 |
| Cwf19l1        | 3.895  | 4.119  | 4.364  | 4.212  | 4.301  | 4.305  | 3.657  | 3.842  | 3.612  | 3.563  | 72502         | CWF19L1  | NM_001081077_19_+_1 |
| Lct            | -4.981 | -2.600 | -3.880 | -3.939 | -3.936 | -4.545 | -4.968 | -4.271 | -4.981 | -4.981 | 226413        | LCT      | NM_001081078_1_+_1  |
| Ogfrl1         | 6.558  | 7.014  | 6.657  | 6.912  | 7.600  | 7.246  | 7.380  | 6.702  | 7.242  | 7.194  | 70155         | OGFRL1   | NM_001081079_1_+_1  |
| Phf3           | 4.807  | 4.702  | 5.147  | 5.028  | 5.459  | 5.362  | 5.392  | 5.220  | 5.500  | 5.349  | 213109        | PHF3     | NM_001081080_1_+_1  |
| Gls            | 3.287  | 3.687  | 3.949  | 4.128  | 3.242  | 3.261  | 3.309  | 3.334  | 3.445  | 3.978  | 14660         | GLS      | NM_001081081_1_+_1  |
| Armc3          | -0.967 | -0.634 | -3.627 | -4.200 | -4.068 | -4.623 | -3.062 | -4.135 | -1.778 | -3.300 | 70882         | ARMC3    | NM_001081083_2_+_1  |
| Cubn           | -1.611 | -3.267 | -4.111 | -3.312 | -4.673 | -4.041 | -4.651 | -4.959 | -3.738 | -4.316 | 65969         | CUBN     | NM_001081084_2_+_1  |
| Sapcd2         | -4.981 | -1.347 | -0.124 | 0.456  | 0.127  | -0.657 | 0.603  | -1.570 | -2.313 | -2.347 | 72080         | SAPCD2   | NM_001081085_2_+_1  |
| Ppig           | 7.037  | 6.975  | 6.306  | 6.183  | 6.263  | 6.315  | 6.457  | 6.201  | 5.805  | 5.985  | 228005        | PIIG     | NM_001081086_2_+_1  |
| Klhl41         | -0.854 | -4.981 | -3.286 | -4.638 | -3.311 | -4.153 | -3.532 | -4.199 | -1.291 | -0.484 | 228003        | KLHL41   | NM_001081087_2_+_1  |
| Gpat2          | -4.981 | -1.523 | -2.901 | -1.528 | -2.430 | -1.260 | -4.370 | -1.673 | -1.755 | -2.023 | 215456        | GPAT2    | NM_001081089_2_+_1  |
| Esf1           | 5.317  | 5.018  | 4.788  | 4.915  | 4.935  | 4.951  | 5.097  | 4.833  | 3.899  | 4.054  | 66580         | ESF1     | NM_001081090_2_+_1  |
| Cep152         | 2.979  | 3.163  | 4.511  | 3.753  | 3.511  | 3.116  | 3.258  | 2.870  | 3.125  | 2.294  | 99100         | CEP152   | NM_001081091_2_+_1  |
| Taf4           | 4.556  | 4.542  | 3.873  | 3.693  | 4.052  | 4.037  | 3.903  | 3.648  | 4.075  | 4.044  | 228980        | TAFA     | NM_001081092_2_+_1  |
| Arfp1          | 4.806  | 5.139  | 5.076  | 5.015  | 4.736  | 4.537  | 4.799  | 4.807  | 5.355  | 5.722  | 99889         | ARFIP1   | NM_001081093_3_+_1  |
| Znhit6         | 4.984  | 4.790  | 4.310  | 4.595  | 4.328  | 4.563  | 4.033  | 3.999  | 2.581  | 2.864  | 229937        | ZNHIT6   | NM_001081094_3_+_1  |
| Zfp362         | 4.552  | 4.222  | 3.395  | 3.427  | 4.703  | 4.684  | 4.103  | 3.886  | 3.739  | 3.313  | 230761        | ZNF362   | NM_001081098_4_+_1  |
| Aunip          | -4.981 | -2.681 | 0.309  | 0.465  | 1.396  | -0.389 | 0.195  | -0.170 | -0.576 | -2.138 | 69885         | AUNIP    | NM_001081099_4_+_1  |
| Morn1          | 0.864  | 0.571  | 3.768  | 3.722  | 0.543  | 0.010  | -0.057 | 0.072  | -0.605 | -1.431 | 76866         | MORN1    | NM_001081100_4_+_1  |
| Uvssa          | 4.326  | 4.556  | 3.596  | 3.389  | 3.979  | 3.992  | 3.643  | 3.503  | 3.446  | 3.537  | 71101         | UVSSA    | NM_001081101_5_+_1  |
| Whsc1          | 2.016  | 2.059  | 3.544  | 3.779  | 3.570  | 3.025  | 3.032  | 3.263  | 3.293  | 3.498  | 107823        | WHSC1    | NM_001081102_5_+_1  |

|               |        |        |        |        |        |        |        |        |        |        |        |          |                     |
|---------------|--------|--------|--------|--------|--------|--------|--------|--------|--------|--------|--------|----------|---------------------|
| Stim2         | 4.154  | 4.315  | 4.623  | 4.594  | 5.399  | 5.470  | 5.096  | 4.784  | 5.675  | 5.746  | 116873 | STIM2    | NM_001081103_5_+_1  |
| Rhoh          | 6.632  | 6.690  | 3.996  | 4.677  | 5.316  | 5.508  | 5.059  | 5.827  | 3.832  | 4.203  | 74734  | RHOH     | NM_001081105_5_+_1  |
| Helq          | 3.902  | 3.944  | 2.509  | 2.480  | 3.701  | 3.590  | 2.774  | 2.914  | 2.806  | 2.836  | 191578 | HELQ     | NM_001081107_5_-_1  |
| Lamtor4       | 6.878  | 6.425  | 5.033  | 4.969  | 5.226  | 5.183  | 5.814  | 5.804  | 6.395  | 5.817  | 66096  | LAMTOR4  | NM_001081108_5_+_1  |
| Lmtk2         | 4.209  | 4.262  | 4.441  | 4.497  | 5.337  | 5.493  | 4.686  | 4.197  | 3.651  | 3.162  | 231876 | LMTK2    | NM_001081109_5_+_1  |
| Cd8a          | 7.381  | 5.708  | 9.399  | 8.986  | 0.379  | 1.107  | 2.384  | 3.063  | -1.216 | -0.376 | 12525  | CD8A     | NM_001081110_6_+_1  |
| Tmf1          | 5.369  | 5.556  | 5.879  | 5.752  | 5.750  | 5.875  | 5.350  | 5.480  | 5.072  | 5.332  | 232286 | TMF1     | NM_001081111_6_-_1  |
| Ankrd26       | 3.151  | 3.483  | 2.412  | 2.253  | 3.072  | 3.005  | 2.232  | 2.168  | 1.602  | 1.872  | 232339 | ANKRD26  | NM_001081112_6_-_1  |
| Ipo8          | 3.904  | 4.159  | 4.379  | 4.313  | 4.573  | 4.802  | 4.497  | 4.551  | 4.494  | 5.057  | 320727 | IPO8     | NM_001081113_6_-_1  |
| Clip3         | -3.189 | -2.883 | -4.945 | -4.318 | -2.294 | -2.357 | -2.136 | -3.483 | -4.981 | -4.981 | 76686  | CLIP3    | NM_001081114_7_+_1  |
| Nccrp1        | -2.620 | -2.239 | 0.314  | 0.405  | 0.787  | 3.259  | 0.633  | 1.244  | -0.854 | -1.239 | 233038 | NCCRP1   | NM_001081115_7_-_1  |
| Arhgef17      | -4.981 | -4.981 | -1.312 | -0.631 | -1.794 | -3.682 | -3.486 | -2.287 | -1.904 | -2.124 | 207212 | ARHGEF17 | NM_001081116_7_-_1  |
| Mki67         | 1.486  | 2.134  | 5.452  | 5.740  | 6.410  | 6.098  | 5.414  | 5.177  | 3.906  | 3.619  | 17345  | MKI67    | NM_001081117_7_-_1  |
| Phrf1         | 4.301  | 4.118  | 5.110  | 5.101  | 5.220  | 5.098  | 5.222  | 5.096  | 5.539  | 5.665  | 101471 | PHRF1    | NM_001081118_7_+_1  |
| Abhd13        | 3.714  | 3.810  | 4.096  | 4.027  | 3.831  | 3.805  | 3.945  | 4.230  | 4.897  | 4.776  | 68904  | ABHD13   | NM_001081119_8_+_1  |
| Fam89a        | 2.112  | -2.883 | 1.835  | 2.725  | 3.303  | 2.969  | 0.898  | 0.294  | 1.380  | 0.437  | 69627  | FAM89A   | NM_001081120_8_-_1  |
| Jhy           | -4.981 | 0.133  | -4.899 | -0.092 | -4.932 | 0.747  | -4.938 | 0.742  | -4.981 | -4.981 | 70989  | C11orf63 | NM_001081121_9_-_1  |
| Cep63         | 0.821  | 0.618  | 0.469  | 0.661  | 3.182  | 1.921  | 0.168  | 0.033  | 0.501  | 0.967  | 28135  | CEP63    | NM_001081122_9_-_1  |
| Gpr161        | -4.981 | -2.848 | -2.813 | -2.214 | -0.276 | -0.499 | -3.515 | -3.284 | -4.578 | -4.239 | 240888 | GPR161   | NM_001081126_1_+_1  |
| Adamts14      | -4.981 | -4.981 | -4.522 | -2.975 | -2.485 | -3.256 | -1.952 | -3.003 | -1.616 | -4.981 | 237360 | ADAMTS14 | NM_001081127_10_-_1 |
| Mtr           | 2.264  | 2.395  | 2.845  | 3.252  | 3.904  | 4.031  | 3.652  | 3.542  | 4.228  | 4.347  | 238505 | MTR      | NM_001081128_13_-_1 |
| Dhtkd1        | -2.178 | -2.600 | -4.966 | -4.966 | -3.523 | -1.755 | -3.997 | -4.752 | -4.981 | -4.981 | 209692 | DHTKD1   | NM_001081131_2_-_1  |
| Upf2          | 4.210  | 4.105  | 4.557  | 4.776  | 5.221  | 5.240  | 4.926  | 4.619  | 4.170  | 4.172  | 326622 | UPF2     | NM_001081132_2_+_1  |
| Kif16b        | 3.253  | 3.316  | 3.792  | 3.977  | 3.809  | 3.610  | 3.649  | 3.561  | 4.067  | 4.094  | 16558  | KIF16B   | NM_001081133_2_-_1  |
| Kcng1         | -2.559 | -1.670 | -3.775 | -4.974 | -4.568 | -2.815 | -3.305 | -3.447 | -4.981 | -4.981 | 241794 | KCNG1    | NM_001081134_2_-_1  |
| Prrg3         | -4.981 | -4.981 | -3.764 | -2.531 | -4.099 | -4.122 | -4.804 | -4.971 | -4.981 | -4.981 | 208748 | PRRG3    | NM_001081135_X_+_1  |
| Ankrd35       | -2.105 | -1.159 | 0.221  | -0.346 | 3.141  | 1.406  | 0.877  | -1.767 | -4.981 | -4.342 | 213121 | ANKRD35  | NM_001081139_3_+_1  |
| Gabbr2        | -4.981 | -4.981 | -4.065 | -4.147 | -4.977 | -4.977 | -3.730 | -4.586 | -2.505 | -2.923 | 242425 | GABBR2   | NM_001081141_4_-_1  |
| Gnat3         | -4.981 | -4.981 | -1.743 | -2.064 | -4.981 | -4.981 | -4.976 | -4.969 | -3.043 | -3.209 | 242851 | GNAT3    | NM_001081143_5_+_1  |
| Zfp518b       | 0.059  | 0.554  | -1.968 | -2.527 | -1.725 | -4.011 | -2.636 | -2.437 | -0.637 | -4.713 | 100515 | ZNF518B  | NM_001081144_5_-_1  |
| Tigd2         | 5.561  | 5.385  | 4.113  | 4.019  | 4.351  | 4.640  | 4.470  | 4.694  | 4.182  | 4.358  | 68140  | TIGD2    | NM_001081145_6_+_1  |
| Kat6a         | 5.546  | 5.555  | 5.884  | 5.714  | 6.209  | 6.145  | 5.583  | 5.490  | 5.490  | 5.334  | 244349 | KAT6A    | NM_001081149_8_+_1  |
| Lonrf1        | 0.074  | 0.050  | 0.717  | 0.299  | 1.189  | 1.931  | 1.122  | 1.698  | 2.829  | 3.568  | 244421 | LONRF1   | NM_001081150_8_-_1  |
| Gan           | 0.244  | 0.996  | 0.686  | 0.391  | 0.387  | 0.043  | 0.138  | -1.229 | 0.663  | 0.221  | 209239 | GAN      | NM_001081151_8_+_1  |
| Npat          | 3.082  | 3.305  | 3.930  | 3.771  | 4.001  | 3.490  | 3.902  | 3.234  | 3.599  | 3.568  | 244879 | NPAT     | NM_001081152_9_+_1  |
| Marf1         | 3.091  | 2.829  | 2.969  | 3.167  | 3.417  | 3.407  | 2.892  | 2.682  | 2.428  | 2.440  | 223989 | KIAA0430 | NM_001081154_16_-_1 |
| Rap1gap       | -1.858 | -1.170 | -0.728 | -0.303 | -3.751 | -2.818 | -2.959 | -2.913 | -1.431 | -1.686 | 110351 | RAP1GAP  | NM_001081155_4_+_1  |
| Cluh          | 3.331  | 3.458  | 3.651  | 3.730  | 3.740  | 3.645  | 4.094  | 4.231  | 5.259  | 4.736  | 74148  | CLUH     | NM_001081158_11_+_1 |
| Mdga1         | 1.081  | 1.613  | -0.140 | -0.422 | -1.549 | -1.722 | -0.283 | 0.088  | 1.585  | 1.438  | 74762  | MDGA1    | NM_001081160_17_-_1 |
| Fam171a1      | -0.946 | -3.783 | -4.862 | -2.131 | -4.883 | -4.882 | -4.877 | -3.534 | -1.319 | 0.691  | 269233 | FAM171A1 | NM_001081161_2_+_1  |
| Slc4a11       | -4.981 | -4.981 | -4.739 | -1.612 | -3.775 | -0.309 | -4.796 | -1.605 | -1.087 | 0.331  | 269356 | SLC4A11  | NM_001081162_2_-_1  |
| Chsy1         | 3.238  | 3.350  | 5.194  | 4.752  | 4.947  | 4.092  | 4.542  | 5.045  | 5.836  | 6.321  | 269941 | CHSY1    | NM_001081163_7_+_1  |
| Otud4         | 3.023  | 4.210  | 4.211  | 3.627  | 3.696  | 4.240  | 4.296  | 3.637  | 3.642  | 3.602  | 73945  | OTUD4    | NM_001081164_8_+_1  |
| Phf21b        | -3.327 | -4.981 | -4.424 | -3.203 | -2.064 | -4.101 | -3.538 | -3.999 | -4.508 | -3.203 | 271305 | PHF21B   | NM_001081166_15_-_1 |
| B3gnt6        | -2.273 | -4.981 | -3.016 | -4.131 | -2.382 | -3.093 | -1.816 | -1.309 | 0.119  | 0.622  | 272411 | B3GNT6   | NM_001081167_7_-_1  |
| Sap30l        | 4.476  | 4.750  | 4.070  | 4.246  | 3.880  | 3.797  | 4.069  | 4.013  | 4.173  | 4.071  | 50724  | SAP30L   | NM_001081168_11_+_1 |
| Pacs2         | 2.776  | 3.536  | 4.552  | 4.243  | 4.637  | 4.401  | 4.968  | 5.065  | 6.326  | 6.383  | 217893 | PACS2    | NM_001081170_12_+_1 |
| Lama5         | -4.981 | -4.981 | -4.975 | -4.870 | -4.530 | -3.754 | -2.850 | -4.854 | -4.981 | -4.981 | 16776  | LAMA5    | NM_001081171_2_-_1  |
| Lrch2         | -4.981 | -4.981 | -4.911 | -4.022 | -4.209 | -3.501 | -4.983 | -3.918 | -4.981 | -4.981 | 210297 | LRCH2    | NM_001081173_X_-_1  |
| Rsg1          | -0.953 | -4.981 | -4.782 | -4.970 | -2.010 | -4.937 | -1.331 | -4.957 | -1.256 | -4.981 | 76166  | RSG1     | NM_001081174_4_-_1  |
| Itpkb         | 1.253  | 0.914  | 1.774  | 1.533  | 2.300  | 2.300  | 1.976  | 2.143  | 2.897  | 2.818  | 320404 | ITPKB    | NM_001081175_1_+_1  |
| Polr3g        | 2.602  | 2.589  | 3.643  | 3.372  | 3.380  | 3.562  | 2.393  | 2.436  | 1.789  | 1.475  | 67486  | POLR3G   | NM_001081176_13_-_1 |
| Kif13b        | 1.858  | 0.140  | 2.469  | 2.375  | 2.670  | 2.153  | 2.430  | 1.496  | 2.600  | 2.199  | 16554  | KIF13B   | NM_001081177_14_+_1 |
| Adgrf5        | -0.778 | -4.981 | -0.027 | 0.610  | -4.618 | -4.855 | -3.909 | -2.907 | -4.981 | -2.572 | 224792 | ADGRF5   | NM_001081178_17_+_1 |
| Heatr5b       | 2.852  | 3.119  | 3.228  | 3.434  | 3.422  | 3.537  | 3.433  | 3.335  | 3.896  | 4.248  | 320473 | HEATR5B  | NM_001081179_17_-_1 |
| 9430016H08Rik | 5.566  | 5.596  | 4.903  | 4.783  | 4.673  | 4.678  | 4.734  | 4.377  | 4.051  | 4.049  | 68115  | C2orf47  | NM_001081181_1_+_1  |
| Atp8b2        | 4.743  | 4.472  | 5.135  | 5.108  | 4.784  | 4.948  | 5.024  | 5.449  | 5.599  | 5.789  | 54667  | ATP8B2   | NM_001081182_3_-_1  |
| 1110037F02Rik | 4.626  | 4.750  | 4.872  | 4.925  | 5.066  | 5.085  | 4.740  | 4.939  | 5.301  | 5.544  | 66185  | KIAA1429 | NM_001081183_4_+_1  |
| Focad         | 1.743  | 1.932  | 2.523  | 2.535  | 1.309  | 1.983  | 2.435  | 2.503  | 3.065  | 3.273  | 230393 | FOCAD    | NM_001081184_4_+_1  |
| Tmem52b       | -4.981 | -1.355 | -2.624 | -4.951 | -0.922 | -4.651 | -2.604 | -4.479 | -4.981 | -4.316 | 330428 | TMEM52B  | NM_001081186_6_+_1  |
| Htra4         | -4.981 | -4.981 | -4.941 | -4.854 | -4.614 | -5.006 | -4.876 | -4.338 | -4.981 | -4.981 | 330723 | HTRA4    | NM_001081187_8_-_1  |
| Exosc7        | 6.129  | 6.156  | 5.506  | 5.647  | 5.770  | 5.866  | 5.630  | 5.536  | 4.387  | 4.042  | 66446  | EXOSC7   | NM_001081188_9_+_1  |
| Uprrt         | 0.126  | 1.039  | 0.847  | 0.402  | 0.834  | 0.166  | 0.382  | -1.509 | 0.559  | 0.855  | 331487 | UPRRT    | NM_001081189_X_+_1  |
| Gabbr3        | -2.233 | -4.981 | -4.821 | -4.973 | -3.611 | -4.811 | -4.968 | -4.975 | -4.981 | -4.981 | 328699 | GABRR3   | NM_001081190_16_+_1 |
| Emi5          | 2.194  | 2.111  | 4.280  | 4.039  | 4.365  | 4.166  | 2.442  | 1.293  | 0.238  | 0.497  | 319670 | EML5     | NM_001081191_12_-_1 |
| Lemd3         | 3.313  | 3.395  | 3.806  | 3.509  | 3.835  | 3.665  | 3.905  | 3.660  | 3.981  | 4.191  | 380664 | LEM3     | NM_001081193_10_-_1 |
| Kcnh4         | -4.981 | -4.981 | -3.538 | -4.644 | -1.543 | -3.133 | -1.549 | -3.800 | -4.981 | -4.981 | 380728 | KCNH4    | NM_001081194_11_-_1 |
| Arid4a        | 6.874  | 6.946  | 8.139  | 7.789  | 8.034  | 8.112  | 7.596  | 7.283  | 6.835  | 6.726  | 238247 | ARID4A   | NM_001081195_12_+_1 |
| Hnrnpul2      | 4.614  | 4.931  | 4.964  | 5.109  | 4.771  | 4.971  | 4.745  | 4.507  | 3.985  | 4.202  | 68693  | HNRNPUL2 | NM_001081196_19_+_1 |
| Mamdc4        | -1.549 | -0.996 | -1.595 | -2.842 | -0.582 | -1.065 | -1.073 | -2.612 | -1.608 | -1.601 | 381352 | MAMDC4   | NM_001081199_2_-_1  |
| Dpy19l4       | 2.200  | 2.771  | 3.405  | 3.396  | 1.982  | 2.182  | 1.809  | 2.390  | 2.073  | 3.169  | 381510 | DPY19L4  | NM_001081201_4_-_1  |
| Sbno1         | 5.557  | 5.221  | 6.397  | 6.304  | 6.803  | 6.601  | 6.294  | 5.984  | 6.134  | 6.154  | 243272 | SBNO1    | NM_001081203_5_-_1  |
| B3glct        | 1.934  | 1.931  | 1.334  | 3.001  | 0.650  | 0.801  | 1.028  | 2.418  | 1.993  | 3.081  | 381694 | B3GLCT   | NM_001081204_5_+_1  |
| Nipal1        | -3.028 | -2.895 | 3.164  | 2.684  | 1.907  | -0.062 | 0.933  | -2.286 | -2.012 | -1.609 | 70701  | NIPAL1   | NM_001081205_5_+_1  |

|               |        |        |        |        |        |        |        |        |        |        |        |          |                     |
|---------------|--------|--------|--------|--------|--------|--------|--------|--------|--------|--------|--------|----------|---------------------|
| Dgki          | -0.582 | 0.716  | -2.683 | -2.506 | -2.858 | -4.094 | -2.089 | -1.848 | -2.086 | -3.233 | 320127 | DGKI     | NM_001081206_6_-_1  |
| Mrpl44        | 5.112  | 4.788  | 4.787  | 4.732  | 4.475  | 4.219  | 4.510  | 4.430  | 4.463  | 4.214  | 69163  | MRPL44   | NM_001081210_1_+_1  |
| Ptafr         | 4.143  | 4.927  | 4.192  | 4.881  | 3.949  | 4.187  | 4.838  | 5.665  | 4.436  | 5.968  | 19204  | PTAFR    | NM_001081211_4_+_1  |
| Irs2          | 5.486  | 5.275  | 5.177  | 5.218  | 6.731  | 6.801  | 5.832  | 6.079  | 5.687  | 5.585  | 384783 | IRS2     | NM_001081212_8_-_1  |
| Ermp1         | 3.710  | 4.001  | 4.592  | 4.913  | 4.813  | 4.900  | 4.491  | 4.649  | 5.158  | 5.487  | 226090 | ERMP1    | NM_001081213_19_-_1 |
| Pprc1         | 1.882  | 1.873  | 3.931  | 3.805  | 3.976  | 3.706  | 3.763  | 3.458  | 3.638  | 3.604  | 226169 | PPRC1    | NM_001081214_19_+_1 |
| Phip          | 6.244  | 6.519  | 6.429  | 6.613  | 7.144  | 7.182  | 6.603  | 6.543  | 5.937  | 6.217  | 83946  | PHIP     | NM_001081216_9_-_1  |
| Zfp174        | -0.098 | 0.611  | -1.231 | -0.844 | 0.023  | 0.211  | -0.242 | -2.129 | -0.439 | -0.678 | 385674 | ZNF174   | NM_001081217_16_+_1 |
| Hcfc2         | 1.218  | 2.228  | 3.046  | 3.149  | 3.231  | 3.131  | 2.342  | 3.063  | 3.168  | 2.924  | 67933  | HCFC2    | NM_001081218_10_+_1 |
| Gpr179        | -4.981 | -4.981 | -4.983 | -4.457 | -2.321 | -4.014 | -3.208 | -4.643 | -4.981 | -4.981 | 217143 | GPR179   | NM_001081220_11_-_1 |
| Ercc6         | 4.445  | 4.406  | 3.898  | 4.184  | 3.938  | 4.268  | 3.502  | 3.921  | 3.657  | 3.626  | 319955 | ERCC6    | NM_001081221_14_+_1 |
| Esco1         | 5.900  | 6.094  | 6.308  | 5.961  | 6.873  | 6.947  | 6.216  | 5.933  | 5.580  | 6.123  | 77805  | ESCO1    | NM_001081222_18_-_1 |
| Rbbp8         | 2.609  | 2.284  | 5.550  | 5.391  | 4.701  | 4.537  | 4.657  | 4.629  | 5.204  | 5.359  | 225182 | RBBP8    | NM_001081223_18_+_1 |
| Fam178a       | 5.495  | 5.935  | 4.827  | 4.768  | 5.143  | 5.098  | 5.210  | 5.310  | 5.280  | 5.797  | 226151 | SLF2     | NM_001081225_19_+_1 |
| 2310009B15Rik | 3.888  | 3.585  | 4.043  | 3.765  | 3.042  | 2.857  | 3.756  | 3.202  | 3.393  | 3.141  | 69549  | C1orf53  | NM_001081226_1_-_1  |
| Stum          | -4.981 | -1.141 | -4.327 | -4.426 | -2.652 | -3.803 | -3.277 | -4.179 | -4.981 | -3.758 | 381310 | STUM     | NM_001081227_1_-_1  |
| Ttc30a2       | -4.981 | -1.123 | -4.134 | -2.414 | -3.827 | -2.347 | -4.962 | -3.431 | -4.981 | -1.655 | 620631 | NA       | NM_001081228_2_-_1  |
| Tsc22d2       | 4.251  | 4.446  | 4.532  | 4.229  | 4.693  | 4.712  | 4.445  | 4.118  | 4.935  | 4.762  | 72033  | TSC22D2  | NM_001081229_3_+_1  |
| Map9          | 0.994  | 0.478  | 0.438  | -0.018 | 0.181  | 1.567  | -2.773 | -0.899 | -4.981 | -4.981 | 213582 | MAP9     | NM_001081230_3_+_1  |
| Lhfp13        | -4.981 | -4.981 | -4.971 | -4.805 | -4.957 | -4.946 | -4.745 | -4.864 | -4.981 | -4.311 | 269629 | LHFPL3   | NM_001081231_5_+_1  |
| D5Erttd579e   | 5.357  | 4.050  | 4.419  | 3.413  | 4.539  | 3.940  | 4.186  | 3.620  | 4.179  | 4.393  | 320661 | KIAA0232 | NM_001081232_5_-_1  |
| Pigg          | 1.770  | 1.993  | 1.939  | 1.675  | 1.701  | 1.644  | 1.066  | 1.249  | 1.690  | 1.957  | 433931 | PIGG     | NM_001081234_5_+_1  |
| Mn1           | 2.483  | 2.106  | -4.753 | -4.277 | 0.127  | 0.060  | -2.904 | -2.077 | -4.981 | -4.981 | 433938 | MN1      | NM_001081235_5_+_1  |
| 2410131K14Rik | 4.591  | 4.348  | 3.524  | 3.712  | 3.997  | 4.004  | 3.930  | 3.356  | 3.553  | 3.439  | 76792  | C12orf49 | NM_001081236_5_+_1  |
| Klh42         | 5.302  | 4.967  | 2.694  | 2.294  | 2.515  | 2.083  | 2.159  | 2.982  | 3.427  | 2.883  | 232539 | KLHL42   | NM_001081237_6_+_1  |
| Palb2         | -1.732 | -4.678 | 2.531  | 2.268  | 2.381  | 2.508  | 1.982  | 1.165  | 1.693  | 0.940  | 233826 | PALB2    | NM_001081238_7_-_1  |
| Lilra5        | 0.202  | -0.068 | -1.682 | 0.897  | 0.063  | 1.498  | 4.758  | 6.272  | 3.225  | 4.582  | 232801 | LILRA5   | NM_001081239_7_+_1  |
| Prmt9         | 4.021  | 4.472  | 3.822  | 3.902  | 3.713  | 4.135  | 3.737  | 3.722  | 4.462  | 4.259  | 102182 | PRMT9    | NM_001081240_8_+_1  |
| Fam65a        | 3.845  | 3.710  | 3.436  | 3.447  | 3.946  | 3.673  | 3.893  | 3.617  | 4.025  | 3.818  | 75687  | FAM65A   | NM_001081241_8_+_1  |
| Tln2          | -3.525 | -2.519 | -3.755 | 0.306  | 0.194  | 4.520  | -4.459 | -0.641 | -2.345 | 0.292  | 70549  | TLN2     | NM_001081242_9_-_1  |
| Filip1        | -3.349 | -1.612 | -3.197 | 0.061  | -4.160 | -1.115 | -3.992 | -0.790 | -1.367 | -1.600 | 70598  | FILIP1   | NM_001081243_9_-_1  |
| Polr3a        | 4.008  | 3.897  | 4.111  | 4.128  | 4.328  | 4.376  | 4.475  | 4.154  | 4.427  | 4.283  | 218832 | POLR3A   | NM_001081247_14_-_1 |
| Vcan          | -4.981 | -4.981 | -4.902 | -4.182 | -4.950 | -4.950 | -4.770 | -3.174 | 3.781  | 4.776  | 13003  | VCAN     | NM_001081249_13_-_1 |
| Myh13         | 4.115  | 2.734  | -4.981 | -4.981 | -4.981 | -4.981 | -4.981 | -4.981 | -4.981 | -4.981 | 544791 | MYH13    | NM_001081250_11_+_1 |
| Pbrm1         | 6.990  | 7.046  | 6.970  | 7.054  | 7.287  | 7.239  | 7.124  | 7.086  | 6.943  | 7.191  | 66923  | PBRM1    | NM_001081251_14_+_1 |
| Uggt2         | 0.902  | 1.333  | -1.862 | -1.198 | -1.473 | -0.512 | -1.774 | -0.415 | -3.373 | -0.178 | 66435  | UGGT2    | NM_001081252_14_-_1 |
| Fbxo43        | -4.981 | -4.981 | -4.535 | -4.777 | -3.590 | -4.486 | -4.747 | -4.738 | -4.981 | -4.094 | 78803  | FBXO43   | NM_001081253_15_-_1 |
| Fam186b       | -4.981 | -4.981 | -4.198 | -4.328 | -3.441 | -3.524 | -4.975 | -2.542 | -3.351 | -4.227 | 545136 | FAM186B  | NM_001081254_15_-_1 |
| Lrch3         | 5.306  | 5.409  | 5.816  | 5.641  | 5.934  | 5.907  | 5.683  | 5.318  | 5.417  | 5.599  | 70144  | LRCH3    | NM_001081255_16_+_1 |
| Kdm3b         | 5.468  | 5.517  | 6.233  | 6.295  | 6.537  | 6.586  | 6.361  | 6.117  | 5.827  | 5.888  | 277250 | KDM3B    | NM_001081256_18_+_1 |
| Hpse2         | -4.981 | -2.681 | -4.981 | -4.981 | -4.772 | -4.960 | -4.974 | -4.978 | -4.981 | -4.981 | 545291 | HPSE2    | NM_001081257_19_-_1 |
| Mfsd7b        | 2.964  | 2.886  | 4.551  | 4.322  | 6.915  | 7.058  | 6.190  | 5.872  | 6.848  | 6.852  | 226844 | FLVC1    | NM_001081259_1_-_1  |
| Tnks1bp1      | 0.579  | -0.376 | 0.043  | -0.436 | 0.239  | 0.032  | 0.646  | 0.278  | 1.674  | 1.790  | 228140 | TNKS1BP1 | NM_001081260_2_+_1  |
| Erich6        | -4.981 | -2.895 | -2.774 | -3.499 | -2.950 | -3.428 | -4.227 | -3.418 | -2.060 | -3.480 | 545527 | ERIC6    | NM_001081262_3_-_1  |
| Slc44a5       | -4.981 | -4.981 | -4.966 | -3.986 | 3.077  | 2.830  | 3.089  | 1.909  | -4.981 | -4.981 | 242259 | SLC44A5  | NM_001081263_3_+_1  |
| Alg6          | 3.156  | 2.812  | 2.389  | 2.331  | 2.781  | 2.539  | 2.661  | 2.445  | 2.329  | 2.455  | 320438 | ALG6     | NM_001081264_4_+_1  |
| Dnaaf5        | 2.692  | 2.208  | 2.609  | 1.858  | 2.110  | 2.335  | 2.135  | 2.469  | 3.043  | 3.054  | 433956 | DNAAF5   | NM_001081265_5_+_1  |
| Ccdc142       | 1.055  | 1.429  | 2.343  | 1.748  | 2.796  | 2.729  | 2.517  | 2.508  | 3.067  | 2.811  | 243510 | CCDC142  | NM_001081266_6_+_1  |
| Rsf1          | 5.441  | 5.745  | 5.550  | 5.543  | 5.855  | 6.179  | 5.598  | 5.487  | 4.715  | 5.114  | 233532 | RSF1     | NM_001081267_7_+_1  |
| Prss53        | -4.981 | -0.487 | -2.452 | -1.312 | -1.777 | -1.727 | -1.881 | -1.796 | -0.974 | -1.278 | 330657 | PRSS53   | NM_001081268_7_-_1  |
| Whsc111       | 3.326  | 3.621  | 3.300  | 3.219  | 4.042  | 3.853  | 3.927  | 3.667  | 4.575  | 4.374  | 234135 | WHSC111  | NM_001081269_8_+_1  |
| Dscaml1       | -1.695 | -4.981 | 2.939  | 3.642  | 1.426  | 1.074  | 1.381  | -0.919 | -4.981 | -4.981 | 114873 | DSCAML1  | NM_001081270_9_+_1  |
| Ldlrad1       | -2.388 | -4.981 | -4.464 | -3.299 | -3.588 | -4.812 | -2.255 | -5.028 | -2.936 | -4.227 | 546840 | LDLRAD1  | NM_001081272_4_+_1  |
| Pgd           | 4.735  | 4.458  | 5.515  | 5.175  | 5.216  | 5.078  | 6.182  | 6.115  | 8.849  | 8.242  | 110208 | PGD      | NM_001081274_4_-_1  |
| Cfap126       | 2.637  | 1.283  | 1.179  | -1.358 | 0.985  | -1.202 | 1.657  | 0.799  | 1.537  | -0.985 | 75472  | CFAP126  | NM_001081275_1_+_1  |
| Ak5           | -0.673 | 0.279  | -2.427 | -2.365 | -4.263 | -4.873 | -4.487 | -4.348 | -1.911 | -4.981 | 229949 | AK5      | NM_001081277_3_-_1  |
| Tbc1d4        | 3.070  | 2.787  | 8.039  | 7.752  | 9.736  | 9.609  | 8.056  | 6.733  | 2.345  | 2.755  | 210789 | TBC1D4   | NM_001081278_14_-_1 |
| Mfhas1        | 3.049  | 3.266  | 2.617  | 3.579  | 2.867  | 3.516  | 2.510  | 3.700  | 3.171  | 4.302  | 52065  | MFHAS1   | NM_001081279_8_+_1  |
| Nlrc3         | -4.981 | -4.981 | -4.336 | -2.334 | -4.540 | -2.154 | -2.708 | 0.087  | -4.981 | -1.547 | 268857 | NLRC3    | NM_001081280_16_-_1 |
| Trim55        | -0.222 | 0.201  | -4.735 | -4.969 | -4.691 | -4.965 | -4.981 | -4.981 | -4.981 | -4.981 | 381485 | TRIM55   | NM_001081281_3_+_1  |
| Ibtk          | 4.483  | 4.481  | 4.609  | 4.856  | 4.707  | 4.691  | 4.775  | 5.080  | 6.622  | 6.723  | 108837 | IBTK     | NM_001081282_9_-_1  |
| Fat1          | -4.981 | -4.981 | -4.981 | -4.981 | -4.402 | -2.734 | -4.975 | -3.820 | -4.981 | -4.981 | 14107  | FAT1     | NM_001081286_8_+_1  |
| Mpp7          | 1.026  | 0.974  | 2.018  | 2.318  | 2.039  | 2.039  | 1.614  | 1.843  | 1.418  | 2.727  | 75739  | MPP7     | NM_001081287_18_-_1 |
| Taf2          | 3.778  | 3.814  | 4.249  | 4.330  | 4.345  | 4.233  | 4.226  | 4.116  | 4.574  | 4.721  | 319944 | TA2F2    | NM_001081288_15_-_1 |
| Fam217b       | 0.596  | 0.406  | -0.347 | -0.813 | 0.244  | 0.067  | 0.857  | 0.316  | 2.494  | 2.121  | 71532  | FAM217B  | NM_001081289_2_+_1  |
| Prrc2c        | 6.796  | 6.918  | 7.143  | 7.034  | 7.066  | 7.137  | 6.743  | 6.568  | 5.720  | 5.814  | 226562 | PRRC2C   | NM_001081290_1_-_1  |
| Ccdc88b       | 5.433  | 5.379  | 6.198  | 6.085  | 7.030  | 7.094  | 6.451  | 5.869  | 5.488  | 5.310  | 78317  | CCDC88B  | NM_001081291_19_-_1 |
| Rprd2         | 3.657  | 3.915  | 3.766  | 3.573  | 4.443  | 3.922  | 4.326  | 3.716  | 4.304  | 3.640  | 75137  | RPRD2    | NM_001081293_3_-_1  |
| Prr19         | -4.981 | -4.981 | -4.610 | -3.918 | -4.977 | -4.977 | -4.981 | -4.981 | -4.981 | -4.981 | 623131 | PRR19    | NM_001081294_7_+_1  |
| Arhgef26      | -3.563 | -3.315 | -3.866 | -3.156 | -3.655 | -3.629 | -3.612 | -3.876 | -3.242 | -3.855 | 622434 | ARHGEF26 | NM_001081295_3_+_1  |
| Adgrl2        | 2.792  | 1.811  | -1.113 | -2.583 | -0.468 | -1.837 | -1.553 | -1.377 | 1.078  | 0.239  | 99633  | ADGRL2   | NM_001081298_3_-_1  |
| Tshz1         | 3.144  | 2.812  | 4.717  | 4.404  | 2.869  | 3.202  | 3.103  | 3.330  | 3.730  | 3.924  | 110796 | TSHZ1    | NM_001081300_18_-_1 |
| Trio          | 3.018  | 2.550  | 4.475  | 4.681  | 3.152  | 3.033  | 3.710  | 3.487  | 4.650  | 4.729  | 223435 | TRIO     | NM_001081302_15_-_1 |
| Atf6          | 6.019  | 5.999  | 6.264  | 6.040  | 6.706  | 6.818  | 6.877  | 7.010  | 7.417  | 7.668  | 226641 | ATF6     | NM_001081304_1_-_1  |

|                |        |        |        |        |        |        |        |        |        |        |               |           |                     |
|----------------|--------|--------|--------|--------|--------|--------|--------|--------|--------|--------|---------------|-----------|---------------------|
| Ptprz1         | -4.981 | -3.315 | -4.961 | -4.525 | -4.844 | -4.954 | -4.799 | -4.768 | -3.738 | -3.459 | 19283         | PTPRZ1    | NM_001081306_6_+_1  |
| Ppp1r12b       | 0.898  | 1.445  | 2.087  | 1.564  | 1.241  | 1.197  | 0.587  | 1.376  | 0.829  | 1.596  | 329251        | NA        | NM_001081307_1_-_1  |
| Taok3          | 1.058  | -0.400 | 1.712  | 1.222  | -0.002 | 1.029  | 0.331  | 0.163  | 1.935  | 1.786  | 330177        | TAOK3     | NM_001081308_5_+_1  |
| Pik3r4         | 3.482  | 3.668  | 3.848  | 3.963  | 4.043  | 4.452  | 3.872  | 4.630  | 5.052  | 4.961  | 75669         | PIK3R4    | NM_001081309_9_+_1  |
| Tmem236        | -4.981 | -4.981 | -3.848 | -4.980 | -3.831 | -4.940 | -3.168 | -2.934 | -1.324 | -1.512 | 625286        | TMEM236   | NM_001081310_2_+_1  |
| Tmco2          | -1.252 | -0.105 | -4.981 | -4.981 | -4.980 | -4.969 | -4.981 | -4.981 | -4.981 | -4.981 | 69469         | TMCO2     | NM_001081312_4_-_1  |
| Brpf3          | 2.786  | 3.581  | 2.068  | 3.165  | 3.199  | 3.767  | 2.796  | 3.493  | 2.794  | 3.463  | 268936        | BRPF3     | NM_001081315_17_+_1 |
| Dsel           | 1.094  | 0.945  | 0.966  | 0.988  | -0.421 | 1.082  | -0.353 | 1.022  | -1.086 | 1.512  | 319901        | DSEL      | NM_001081316_1_-_1  |
| Ric1           | 2.156  | 2.774  | 3.503  | 3.580  | 4.381  | 4.108  | 3.656  | 3.265  | 3.268  | 3.440  | 226089        | RIC1      | NM_001081319_19_+_1 |
| Cyb561d1       | 3.557  | 3.271  | 3.579  | 3.754  | 3.931  | 3.972  | 3.796  | 3.487  | 4.717  | 4.240  | 72023         | CYB561D1  | NM_001081320_3_-_1  |
| Pds5a          | 3.506  | 3.334  | 4.497  | 4.612  | 4.978  | 4.886  | 4.549  | 4.550  | 5.234  | 5.515  | 71521         | PDS5A     | NM_001081321_5_-_1  |
| Myo5c          | -1.071 | -1.435 | -2.824 | -4.958 | -2.731 | -4.754 | -4.151 | -3.380 | -2.351 | -4.981 | 208943        | MYO5C     | NM_001081322_9_+_1  |
| Mphosph9       | 1.001  | 2.431  | 1.494  | 0.622  | 1.946  | 2.027  | 1.211  | 0.366  | -0.162 | -0.117 | 269702        | MPHOSPH9  | NM_001081323_5_-_1  |
| Neto2          | -2.647 | -2.160 | -1.322 | -1.185 | -0.727 | -0.498 | -0.975 | -2.127 | -0.012 | -0.017 | 74513         | NETO2     | NM_001081324_8_-_1  |
| Agl            | 3.830  | 3.404  | 4.045  | 3.877  | 4.402  | 4.278  | 4.430  | 4.125  | 4.710  | 4.835  | 77559         | AGL       | NM_001081326_3_-_1  |
| Hs3st2         | -0.046 | -1.805 | -0.782 | -0.104 | -0.756 | -0.626 | -0.563 | 0.914  | -0.783 | -2.452 | 195646        | H3S3T2    | NM_001081327_7_+_1  |
| Chsy3          | -4.981 | -4.981 | 0.874  | 2.551  | -1.409 | 1.048  | -2.280 | -0.299 | -4.981 | -1.431 | 78923         | CHSY3     | NM_001081328_18_+_1 |
| Zkscan2        | -4.981 | -4.981 | -3.558 | -3.160 | -4.981 | -4.981 | -4.968 | -4.975 | -4.981 | -4.981 | 210162        | ZKSCAN2   | NM_001081329_7_-_1  |
| Dnah2          | -2.164 | -2.239 | 0.288  | -0.088 | 3.317  | 4.259  | 2.970  | 2.879  | 3.147  | 3.204  | 327954        | DNAH2     | NM_001081330_11_-_1 |
| D7Erdt443e     | -1.504 | -0.513 | -4.794 | -4.934 | -2.163 | -2.020 | -3.489 | -4.934 | -4.981 | -4.981 | 71007         | C10orf90  | NM_001081331_7_-_1  |
| Sic9a5         | -1.227 | -0.391 | -1.318 | -1.303 | 0.034  | 0.107  | -0.922 | -0.621 | -2.519 | -2.730 | 277973        | SLC9A5    | NM_001081332_8_+_1  |
| Plekhg4        | -2.362 | -2.349 | -0.367 | -0.557 | -4.770 | -4.679 | -1.511 | -2.951 | -1.591 | -1.518 | 102075        | PLEKHG4   | NM_001081333_8_+_1  |
| Cul9           | 3.488  | 3.695  | 3.372  | 3.164  | 3.308  | 3.310  | 2.720  | 2.698  | 3.218  | 2.794  | 78309         | CUL9      | NM_001081335_17_-_1 |
| Dgkh           | -1.627 | -4.981 | 1.582  | 2.090  | -0.339 | 0.700  | 2.160  | 2.570  | 4.088  | 4.108  | 380921        | DGKH      | NM_001081336_14_-_1 |
| Sipa1l2        | 1.294  | 2.015  | 0.799  | 0.671  | 1.198  | 0.514  | 1.288  | 1.326  | 4.273  | 3.519  | 244668        | SIP1L2    | NM_001081337_8_-_1  |
| L3mbt1l        | -4.981 | -4.981 | -4.155 | -4.987 | -4.908 | -3.933 | -4.936 | -3.944 | -3.925 | -4.981 | 241764        | L3MBT1L   | NM_001081338_2_+_1  |
| Setd2          | 6.177  | 5.995  | 6.042  | 5.800  | 6.744  | 6.662  | 6.216  | 5.968  | 5.871  | 6.050  | 235626        | SETD2     | NM_001081340_9_+_1  |
| Scaper         | 4.420  | 4.441  | 5.621  | 5.317  | 5.425  | 5.719  | 4.592  | 4.263  | 2.969  | 3.463  | 244891        | SCAPER    | NM_001081341_9_-_1  |
| Adgrd1         | -4.981 | -3.315 | -4.981 | -4.981 | -1.215 | -2.710 | -3.394 | -2.805 | -3.750 | -4.981 | 243277        | ADGRD1    | NM_001081342_5_+_1  |
| 3110043O21Rik  | 2.985  | 2.800  | 6.294  | 6.213  | 4.565  | 4.600  | 4.811  | 4.728  | 5.067  | 5.043  | 73205         | C9orf72   | NM_001081343_4_-_1  |
| Stxbp5         | 2.833  | 3.444  | 3.505  | 3.703  | 2.564  | 2.693  | 2.856  | 3.100  | 3.899  | 4.217  | 78808         | STXBP5    | NM_001081344_10_-_1 |
| Chd2           | 5.575  | 5.629  | 5.203  | 5.193  | 5.973  | 6.033  | 5.231  | 5.085  | 4.279  | 4.117  | 244059        | CHD2      | NM_001081345_7_-_1  |
| Rtkn2          | -4.981 | -2.883 | -2.622 | -3.254 | -1.097 | -1.821 | -1.086 | -2.453 | -0.358 | -2.993 | 170799        | RTKN2     | NM_001081346_10_+_1 |
| Rhobtb1        | -4.035 | -4.021 | 0.572  | -0.542 | -3.142 | -3.827 | -2.584 | -1.765 | -4.981 | -4.537 | 69288         | RHOBTB1   | NM_001081347_10_+_1 |
| Sic43a1        | -4.341 | -0.284 | -4.586 | 0.859  | -3.844 | 1.291  | -3.190 | 0.340  | -4.771 | -4.789 | 72401         | SLC43A1   | NM_001081349_2_+_1  |
| Cped1          | -1.331 | -2.997 | -4.904 | -3.324 | -3.713 | -4.041 | -2.077 | -1.309 | 1.865  | 2.920  | 214642        | CPED1     | NM_001081351_6_+_1  |
| Ttc37          | 2.744  | 2.836  | 3.354  | 4.110  | 3.600  | 5.650  | 3.498  | 4.653  | 3.733  | 4.446  | 218343        | TTC37     | NM_001081352_13_+_1 |
| 22100408121Rik | 2.651  | 2.723  | 0.952  | 0.937  | 1.506  | 1.457  | 0.603  | -0.110 | -0.148 | 0.130  | 72371         | KIAA0825  | NM_001081353_13_+_1 |
| Maml1          | -4.862 | -4.337 | -2.262 | -3.763 | -4.092 | -2.943 | -4.908 | -3.054 | -4.176 | -2.334 | 333639        | NA        | NM_001081354_X_+_1  |
| Prdm2          | 2.442  | 2.148  | 3.970  | 3.711  | 3.001  | 2.915  | 2.570  | 2.543  | 2.886  | 2.436  | 110593        | PRDM2     | NM_001081355_4_-_1  |
| Vma21          | 6.219  | 6.128  | 6.116  | 6.221  | 5.593  | 5.602  | 5.889  | 5.734  | 5.319  | 5.677  | 67048         | NA        | NM_001081356_X_+_1  |
| Ubr5           | 3.604  | 4.011  | 4.024  | 4.063  | 4.394  | 4.019  | 3.895  | 3.673  | 4.145  | 4.327  | 70790         | UBR5      | NM_001081359_15_-_1 |
| Camsap2        | 3.272  | 3.590  | 3.257  | 3.440  | 2.984  | 3.406  | 3.486  | 3.516  | 4.291  | 3.935  | 67886         | CAMSAP2   | NM_001081360_1_-_1  |
| Trrap          | 4.868  | 4.988  | 4.934  | 5.083  | 5.193  | 5.110  | 5.036  | 4.831  | 5.042  | 5.289  | 100683        | TRRAP     | NM_001081362_5_+_1  |
| Cenpf          | -0.351 | 0.252  | 3.274  | 3.385  | 4.372  | 3.825  | 3.732  | 2.645  | 1.301  | 0.688  | 108000        | CENPF     | NM_001081363_1_-_1  |
| Arhgap21       | 4.359  | 4.529  | 4.782  | 4.377  | 1.629  | 2.118  | 2.749  | 3.159  | 3.163  | 3.541  | 71435         | ARHGAP21  | NM_001081364_2_-_1  |
| Cystm1         | 0.722  | -0.552 | 4.314  | 4.179  | 0.410  | 1.874  | -0.543 | 0.188  | -2.195 | -3.210 | 66060         | NA        | NM_001081365_18_+_1 |
| Tbccd1         | 3.658  | 3.763  | 3.643  | 3.680  | 3.426  | 3.485  | 3.386  | 3.707  | 4.033  | 3.894  | 70573         | TBCCD1    | NM_001081368_16_-_1 |
| Dmxl1          | 5.022  | 4.898  | 4.934  | 4.507  | 4.553  | 4.597  | 4.334  | 4.519  | 3.653  | 4.337  | 240283        | DMXL1     | NM_001081371_18_+_1 |
| Cep164         | 5.325  | 5.061  | 3.563  | 3.095  | 3.945  | 4.227  | 4.052  | 3.642  | 3.292  | 3.309  | 214552        | CEP164    | NM_001081373_9_-_1  |
| Record_removed | 2.756  | 2.780  | 1.008  | 1.378  | 1.822  | 1.920  | 0.895  | 0.736  | 0.401  | 0.285  | Record_remove | NA        | NM_001081374_7_-_1  |
| Chd5           | -4.981 | -4.981 | -4.836 | -4.910 | -4.574 | -4.963 | -4.762 | -4.739 | -3.343 | -4.397 | 269610        | CHD5      | NM_001081376_4_+_1  |
| Kidins220      | 5.215  | 5.213  | 5.658  | 5.177  | 5.538  | 5.113  | 5.445  | 5.298  | 5.723  | 5.836  | 77480         | KIDINS220 | NM_001081378_12_+_1 |
| Ankrd11        | 6.514  | 6.526  | 6.635  | 6.413  | 7.098  | 7.092  | 6.916  | 6.772  | 7.013  | 6.861  | 77087         | ANKRD11   | NM_001081379_8_-_1  |
| Elp6           | 3.183  | 3.398  | 2.815  | 3.194  | 3.008  | 2.743  | 2.429  | 2.565  | 1.887  | 1.740  | 72341         | ELP6      | NM_001081381_9_+_1  |
| Zfp777         | 2.648  | 2.550  | 2.651  | 2.502  | 2.845  | 2.824  | 2.478  | 2.623  | 3.398  | 2.858  | 72306         | ZNF777    | NM_001081382_6_-_1  |
| Kmt2c          | 5.672  | 5.756  | 6.142  | 6.136  | 7.101  | 7.114  | 6.296  | 5.981  | 5.850  | 5.897  | 231051        | KMT2C     | NM_001081383_5_-_1  |
| Ctcf1          | -1.628 | -1.149 | -1.683 | -1.188 | -1.698 | -1.462 | -1.767 | -1.927 | -0.272 | -1.522 | 664799        | CTCF1     | NM_001081387_2_-_1  |
| Palld          | -4.981 | -4.981 | -4.715 | -4.096 | -4.763 | -4.943 | -4.981 | -4.981 | -4.981 | -4.981 | 72333         | PALLD     | NM_001081390_8_-_1  |
| Mdn1           | 4.247  | 3.722  | 4.268  | 4.009  | 4.796  | 4.796  | 4.017  | 3.880  | 2.669  | 2.219  | 100019        | MDN1      | NM_001081392_4_+_1  |
| Tmem248        | -3.162 | -2.452 | -3.810 | -4.016 | -4.459 | -4.817 | -3.758 | -4.075 | -3.355 | -0.580 | 71667         | TMEM248   | NM_001081394_5_+_1  |
| Amotl1         | -1.467 | -3.267 | -1.268 | -0.214 | -2.297 | -2.605 | -3.894 | -2.814 | -4.981 | -4.981 | 75723         | AMOTL1    | NM_001081395_9_-_1  |
| Tbc1d31        | 2.364  | 3.070  | 3.079  | 3.007  | 3.065  | 2.783  | 2.647  | 3.015  | 3.624  | 3.834  | 210544        | TBC1D31   | NM_001081396_15_+_1 |
| 1810013L24Rik  | 4.307  | 4.202  | 5.075  | 5.111  | 4.848  | 4.697  | 4.679  | 4.703  | 5.086  | 5.669  | 69053         | C16orf72  | NM_001081400_16_+_1 |
| Adamts3        | -4.981 | -4.981 | -1.210 | -1.635 | -1.319 | -1.437 | -2.618 | -1.845 | -1.660 | -0.251 | 330119        | ADAMTS3   | NM_001081401_5_-_1  |
| Wdr70          | 3.975  | 3.823  | 3.680  | 3.517  | 3.682  | 3.632  | 3.586  | 3.594  | 3.749  | 3.389  | 545085        | WDR70     | NM_001081402_15_-_1 |
| Klh14          | -4.981 | -4.981 | -4.870 | -2.534 | -4.950 | -1.809 | -4.798 | -0.005 | -4.394 | -4.981 | 225266        | KLHL14    | NM_001081403_18_-_1 |
| Lrr1           | -4.981 | -0.866 | 0.691  | 0.703  | 1.856  | 0.616  | 1.377  | 0.437  | -0.649 | -1.783 | 69706         | LRR1      | NM_001081406_12_+_1 |
| Plb1           | -4.981 | -4.981 | 0.039  | 1.790  | -3.807 | 0.188  | -4.704 | -3.470 | -4.981 | -4.981 | 665270        | PLB1      | NM_001081407_5_+_1  |
| Phf20l1        | 6.103  | 5.859  | 5.502  | 5.299  | 5.982  | 5.902  | 6.055  | 5.839  | 6.718  | 6.702  | 239510        | PHF20L1   | NM_001081409_15_+_1 |
| Sclt1          | 3.853  | 3.552  | 3.646  | 3.637  | 4.028  | 4.087  | 3.534  | 3.433  | 2.209  | 2.173  | 67161         | SCLT1     | NM_001081411_3_-_1  |
| Bcr            | 5.090  | 4.743  | 1.285  | 1.424  | 1.128  | 1.017  | 1.792  | 1.212  | 3.749  | 3.407  | 110279        | BCR       | NM_001081412_10_+_1 |
| Unc13b         | -4.146 | -3.569 | -2.015 | -2.622 | -4.502 | -4.747 | -4.523 | -4.787 | -4.362 | -4.068 | 22249         | UNC13B    | NM_001081413_4_+_1  |
| Grm5           | 1.651  | 0.739  | -3.086 | -4.987 | -3.654 | -4.996 | -3.224 | -4.449 | -3.433 | -4.981 | 108071        | GRM5      | NM_001081414_7_+_1  |

|                |                |        |        |        |        |        |        |        |        |        |        |               |          |                     |
|----------------|----------------|--------|--------|--------|--------|--------|--------|--------|--------|--------|--------|---------------|----------|---------------------|
|                | Samd1          | 1.127  | 0.858  | 2.377  | 2.577  | 2.856  | 2.937  | 2.728  | 2.719  | 2.388  | 3.069  | 666704        | SAMD1    | NM_001081415_8_+_1  |
|                | Fndc1          | -4.981 | -4.981 | -0.255 | 1.492  | -4.063 | -4.714 | -1.786 | -1.127 | -4.981 | -4.981 | 68655         | NA       | NM_001081416_17_-_1 |
|                | Gltscr1        | 2.287  | 1.950  | 2.410  | 1.576  | 2.888  | 2.206  | 2.559  | 1.875  | 3.407  | 2.970  | 243842        | GLTSCR1  | NM_001081418_7_-_1  |
|                | Dip2a          | -0.988 | 0.194  | 3.300  | 2.911  | 2.096  | 1.906  | 2.362  | 1.396  | 3.059  | 3.354  | 64451         | DIP2A    | NM_001081419_10_-_1 |
|                | Fam206a        | 3.809  | 3.880  | 4.084  | 4.158  | 4.069  | 4.274  | 3.870  | 4.183  | 3.952  | 4.097  | 230234        | FAM206A  | NM_001081420_4_+_1  |
|                | Galnt16        | -4.981 | -4.981 | -4.135 | -4.942 | -2.836 | -1.207 | -4.981 | -4.981 | -3.738 | -4.981 | 108760        | GALNT16  | NM_001081421_12_+_1 |
|                | Bod1l          | 6.942  | 7.076  | 6.383  | 6.280  | 7.170  | 7.177  | 6.794  | 6.558  | 5.888  | 5.768  | 665775        | BOD1L1   | NM_001081422_5_-_1  |
|                | TtlI5          | 2.064  | 1.824  | 2.175  | 2.563  | 3.822  | 3.936  | 2.223  | 2.166  | 2.161  | 2.382  | 320244        | TTL5     | NM_001081423_12_+_1 |
|                | Chrna10        | -4.981 | -3.315 | -4.979 | -4.979 | -4.888 | -4.953 | -4.981 | -4.981 | -4.981 | -1.767 | 504186        | CHRNA10  | NM_001081424_7_-_1  |
|                | Dip2c          | 2.472  | 2.505  | 1.008  | 1.186  | 0.026  | 1.647  | -1.600 | 0.601  | -2.008 | 0.882  | 208440        | DIP2C    | NM_001081426_13_+_1 |
|                | Flnb           | 2.403  | 2.359  | 4.846  | 4.644  | 5.150  | 4.801  | 4.811  | 3.960  | 1.222  | 1.123  | 286940        | FLNB     | NM_001081427_14_+_1 |
|                | Fam184a        | 0.720  | 1.294  | -1.642 | -1.598 | -1.358 | -0.500 | -2.839 | -2.228 | -4.981 | -4.981 | 75906         | FAM184A  | NM_001081428_10_-_1 |
|                | Ccdc15         | 1.515  | 0.965  | 1.087  | 0.446  | 1.343  | 0.950  | 0.909  | 1.009  | 0.203  | -0.512 | 245902        | CCDC15   | NM_001081429_9_-_1  |
| Record_removed | Record_removed | 4.312  | 4.336  | 4.295  | 4.288  | 4.056  | 3.798  | 4.414  | 3.993  | 4.188  | 4.645  | Record_remove | NA       | NM_001081430_14_+_1 |
|                | Zscan25        | -1.926 | -1.235 | -2.629 | -1.595 | -2.606 | -2.681 | -2.731 | -3.506 | -2.008 | -3.816 | 666311        | ZSCAN25  | NM_001081431_5_+_1  |
|                | Ankrd44        | 5.516  | 5.849  | 6.466  | 6.140  | 6.884  | 6.975  | 6.994  | 7.020  | 7.522  | 7.935  | 329154        | ANKRD44  | NM_001081433_1_-_1  |
|                | Osbpl7         | 2.710  | 2.848  | 3.173  | 3.147  | 3.412  | 2.783  | 3.141  | 2.265  | 3.178  | 2.767  | 71240         | OSBPL7   | NM_001081434_11_+_1 |
|                | Fbxo47         | -0.214 | -0.619 | -1.939 | -2.599 | -2.231 | -3.248 | -2.072 | -4.427 | -2.605 | -2.759 | 72973         | FBXO47   | NM_001081435_11_-_1 |
|                | Ino80d         | 2.406  | 2.856  | 2.400  | 1.455  | 2.568  | 2.456  | 1.268  | 1.274  | 2.282  | 2.747  | 227195        | INO80D   | NM_001081436_1_-_1  |
|                | Wdr86          | -1.503 | -2.997 | 4.911  | 5.052  | 3.391  | 2.606  | 2.595  | 1.650  | -3.471 | -4.981 | 269633        | WDR86    | NM_001081441_5_-_1  |
|                | Ncam1          | -2.013 | 1.985  | -4.911 | -4.652 | -4.168 | -2.133 | -3.423 | -1.452 | 1.582  | 1.186  | 17967         | NCAM1    | NM_001081445_9_-_1  |
|                | Iqck           | -0.877 | 1.039  | -2.334 | -1.602 | -1.321 | -0.265 | -1.520 | -1.850 | -2.834 | -4.981 | 434232        | IQCK     | NM_001081446_7_+_1  |
|                | Vmn2r84        | -2.842 | -2.437 | -4.512 | -4.879 | -3.200 | -3.561 | -4.743 | -4.953 | -4.981 | -4.981 | 625068        | NA       | NM_001081448_10_-_1 |
|                | Nin            | 3.578  | 3.243  | 3.794  | 3.415  | 4.345  | 4.072  | 4.777  | 4.662  | 6.419  | 6.340  | 18080         | NIN      | NM_001081453_12_-_1 |
|                | Furin          | 1.979  | 1.732  | 3.332  | 2.880  | 2.130  | 2.262  | 2.938  | 2.241  | 4.959  | 4.880  | 18550         | FURIN    | NM_001081454_7_-_1  |
|                | Plcd4          | -3.189 | -3.315 | -4.925 | -4.615 | -4.478 | -4.718 | -4.658 | -4.949 | -3.584 | -2.885 | 18802         | PLCD4    | NM_001081456_1_+_1  |
|                | Ppp2r5c        | 4.920  | 4.222  | 5.174  | 5.048  | 5.222  | 4.972  | 6.019  | 5.455  | 6.975  | 6.555  | 26931         | NA       | NM_001081457_12_+_1 |
|                | Ppp2r5c        | 4.380  | 4.828  | 5.052  | 5.026  | 4.847  | 4.661  | 4.918  | 4.389  | 3.554  | 2.900  | 26931         | NA       | NM_001081458_12_+_1 |
|                | Sh2b1          | -4.175 | -4.291 | -3.993 | -4.824 | -3.897 | -4.054 | -4.009 | -3.837 | -4.615 | -4.660 | 20399         | SH2B1    | NM_001081459_7_-_1  |
|                | Gtf2ird1       | -4.818 | -2.105 | -0.116 | 0.394  | -1.393 | 0.313  | -0.418 | -1.759 | -2.374 | -0.801 | 57080         | GTF2IRD1 | NM_001081462_5_-_1  |
|                | Gtf2ird1       | -1.643 | -4.304 | 0.973  | -0.665 | -0.924 | 0.465  | -1.457 | 0.313  | -1.783 | -0.593 | 57080         | GTF2IRD1 | NM_001081463_5_-_1  |
|                | Gtf2ird1       | -3.247 | -3.199 | 0.260  | -3.142 | -0.971 | -2.116 | -1.158 | 0.553  | 0.349  | 1.038  | 57080         | GTF2IRD1 | NM_001081464_5_-_1  |
|                | Gtf2ird1       | -2.141 | -0.616 | 0.835  | 0.101  | -1.979 | 0.250  | -2.089 | -1.428 | -2.975 | -4.504 | 57080         | GTF2IRD1 | NM_001081465_5_-_1  |
|                | Gtf2ird1       | -0.952 | -0.625 | -1.154 | -1.120 | -2.646 | -0.442 | -1.183 | -1.464 | 0.087  | 0.213  | 57080         | GTF2IRD1 | NM_001081466_5_-_1  |
|                | Gtf2ird1       | -4.949 | -3.068 | -1.827 | -1.873 | -2.426 | -1.998 | -1.790 | -4.698 | -4.484 | -2.299 | 57080         | GTF2IRD1 | NM_001081467_5_-_1  |
|                | Gtf2ird1       | -4.239 | -1.659 | -2.021 | -0.830 | -2.471 | -4.766 | -2.331 | -3.703 | -4.488 | -4.563 | 57080         | GTF2IRD1 | NM_001081468_5_-_1  |
|                | Gtf2ird1       | -4.413 | 0.423  | 0.551  | 1.075  | -0.635 | -1.474 | -0.140 | -4.655 | -4.352 | -2.166 | 57080         | GTF2IRD1 | NM_001081469_5_-_1  |
|                | Gtf2ird1       | -4.429 | -3.346 | 0.717  | -0.508 | -2.215 | -0.137 | -0.388 | -2.014 | -4.237 | -0.571 | 57080         | GTF2IRD1 | NM_001081470_5_-_1  |
|                | Zxdb           | 4.471  | 5.025  | 3.515  | 3.188  | 3.247  | 2.699  | 2.923  | 3.008  | 3.108  | 3.298  | 668166        | ZXDB     | NM_001081473_X_+_1  |
|                | Nasp           | 4.972  | 5.213  | 4.957  | 4.977  | 5.499  | 5.312  | 5.249  | 5.133  | 3.901  | 3.848  | 50927         | NASP     | NM_001081475_4_-_1  |
|                | Brwd3          | 2.018  | 1.904  | 2.484  | 2.385  | 2.295  | 2.376  | 1.933  | 1.729  | 2.136  | 2.531  | 382236        | BRWD3    | NM_001081477_X_-_1  |
|                | Fbxo9          | 3.878  | 4.515  | 2.510  | 2.628  | 2.308  | 2.947  | 2.769  | 2.564  | 3.333  | 3.399  | 71538         | FBXO9    | NM_001081490_9_-_1  |
|                | Tbc1d8b        | 2.445  | 2.942  | 3.027  | 2.666  | 3.165  | 2.950  | 2.615  | 2.259  | 1.792  | 3.090  | 245638        | TBC1D8B  | NM_001081499_X_+_1  |
|                | Rcan1          | 3.390  | 4.051  | 3.358  | 3.001  | 3.582  | 3.989  | 3.131  | 3.381  | 4.330  | 4.315  | 54720         | RCAN1    | NM_001081549_16_-_1 |
|                | Camta1         | -3.659 | -4.981 | -2.312 | -2.618 | -0.343 | -1.394 | -3.417 | -4.302 | -2.452 | -2.982 | 100072        | CAMTA1   | NM_001081557_4_-_1  |
|                | Gm6592         | -4.981 | -4.981 | -4.977 | -4.425 | -4.564 | -4.928 | -4.809 | -4.841 | -4.981 | -4.981 | 625480        | NA       | NM_001081564_X_+_1  |
|                | Pik3r6         | -1.821 | -2.255 | 1.974  | 3.362  | 3.945  | 3.770  | 3.221  | 4.232  | 6.553  | 6.484  | 104709        | PIK3R6   | NM_001081566_11_+_1 |
|                | Mapk10         | -3.914 | -3.245 | -4.262 | -3.834 | -4.960 | -4.885 | -4.986 | -3.203 | -4.981 | -4.981 | 26414         | MAPK10   | NM_001081567_5_-_1  |
|                | Dgcr14         | 3.823  | 3.293  | 3.174  | 3.154  | 3.013  | 3.133  | 2.668  | 2.899  | 3.449  | 2.977  | 27886         | DGCR14   | NM_001081633_16_-_1 |
|                | Ccnd3          | 1.768  | 1.288  | 2.706  | 1.745  | 3.345  | 3.872  | 2.981  | 3.130  | 3.348  | 2.449  | 12445         | CCND3    | NM_001081635_17_+_1 |
|                | Ccnd3          | 3.081  | 2.716  | 2.250  | 2.390  | 3.876  | 4.442  | 3.399  | 3.486  | 3.253  | 2.879  | 12445         | CCND3    | NM_001081636_17_+_1 |
|                | Xlr4a          | 4.246  | 2.279  | 3.312  | 1.398  | 4.169  | 2.563  | 3.850  | 1.747  | 1.582  | 1.067  | 434794        | NA       | NM_001081642_X_-_1  |
|                | Xlr3b          | 4.203  | 3.468  | 3.904  | 2.891  | 3.737  | 2.833  | 3.706  | 2.904  | 3.445  | 3.176  | 574437        | NA       | NM_001081643_X_+_1  |
|                | Rgs3           | -0.373 | -2.895 | -2.031 | -1.352 | -4.974 | -4.974 | -3.491 | -1.250 | 0.242  | -0.662 | 50780         | RGS3     | NM_001081650_4_+_1  |
|                | Rab42          | -2.948 | -4.981 | -1.233 | -1.718 | -4.938 | -3.137 | -1.693 | -1.888 | -3.373 | -1.974 | 242681        | RAB42    | NM_001081651_4_-_1  |
|                | Nacad          | -4.981 | -2.883 | -3.115 | -3.747 | -4.333 | -2.596 | -1.249 | -2.805 | -0.572 | -3.209 | 192950        | NA       | NM_001081652_11_-_1 |
|                | Tex264         | 5.955  | 6.216  | 3.704  | 4.465  | 3.148  | 4.103  | 3.702  | 4.799  | 4.137  | 4.586  | 21767         | TEX264   | NM_001081654_9_-_1  |
|                | Dact3          | -0.878 | -0.299 | -0.924 | -0.273 | 1.711  | 0.928  | 0.170  | -0.575 | -1.563 | -1.530 | 629378        | DACT3    | NM_001081655_7_+_1  |
|                | Neurl1b        | 0.172  | -1.972 | 3.787  | 3.020  | 1.285  | -0.692 | 2.167  | 2.387  | 1.286  | 2.610  | 240055        | NEURL1B  | NM_001081656_17_+_1 |
|                | Nup62cl        | -4.981 | -4.981 | -4.140 | -4.984 | -4.783 | -4.426 | -4.981 | -4.981 | -4.981 | -4.981 | 279706        | NA       | NM_001081668_X_-_1  |
|                | Cldn34b2       | -3.563 | -4.981 | -4.970 | -4.970 | -2.842 | -4.987 | -3.028 | -4.945 | -3.531 | -4.981 | 73347         | NA       | NM_001081671_X_-_1  |
|                | Zfp800         | 5.734  | 5.299  | 6.175  | 6.000  | 6.326  | 6.293  | 6.059  | 5.762  | 5.177  | 5.390  | 627049        | ZNF800   | NM_001081678_6_-_1  |
|                | Tomt           | -1.195 | -1.234 | -0.130 | -1.058 | -0.455 | -1.859 | -0.939 | -2.091 | -0.185 | -0.484 | 791260        | LRTOMT   | NM_001081679_7_-_1  |
|                | Zfp72          | -0.485 | -0.442 | -0.998 | -0.589 | -0.570 | -0.692 | -0.783 | -0.653 | -0.527 | 0.124  | 238722        | ZNF502   | NM_001081680_13_-_1 |
|                | Gnb1l          | -0.423 | 1.404  | -0.332 | -1.877 | -0.053 | -1.095 | -0.813 | 0.692  | -0.068 | -0.952 | 13972         | GNB1L    | NM_001081682_16_+_1 |
|                | Zbtb21         | 1.943  | 2.590  | 2.153  | 1.845  | 1.819  | 1.391  | 1.800  | 1.935  | 3.142  | 3.067  | 114565        | ZBTB21   | NM_001081684_16_-_1 |
|                | Zbtb21         | 2.673  | 3.098  | 2.503  | 2.662  | 1.729  | 1.384  | 1.697  | 1.306  | 2.886  | 2.620  | 114565        | ZBTB21   | NM_001081685_16_-_1 |
|                | Gm5150         | 1.175  | 0.292  | 0.063  | 0.451  | 3.597  | 3.924  | 4.962  | 5.768  | 5.453  | 6.419  | 381484        | NA       | NM_001081687_3_-_1  |
|                | Tmprss9        | -3.668 | -2.681 | -3.068 | -3.912 | -4.957 | -4.779 | -4.468 | -4.880 | -4.394 | -4.227 | 432478        | TMPRSS9  | NM_001081688_10_+_1 |
|                | Dnmt3l         | -4.981 | -4.981 | -4.981 | -4.981 | -4.965 | -4.690 | -4.981 | -4.981 | -4.981 | -4.919 | 54427         | DNMT3L   | NM_001081695_10_+_1 |
|                | Gm7609         | 3.228  | 4.717  | 2.385  | 3.708  | 2.059  | 3.674  | 1.002  | 3.635  | -1.142 | 3.768  | 665378        | NA       | NM_001081746_1_+_1  |
|                | Zfp664         | 4.695  | 4.614  | 4.520  | 4.657  | 4.329  | 4.622  | 4.075  | 4.124  | 3.105  | 3.629  | 269704        | ZNF664   | NM_001081750_5_+_1  |
|                | Nckap5         | -4.981 | -4.981 | 0.082  | -1.473 | -4.981 | -4.981 | -4.915 | -3.600 | -4.981 | -4.981 | 210356        | NCKAP5   | NM_001081756_1_-_1  |
|                | Akap17b        | 2.054  | 1.988  | 3.315  | 3.471  | 1.835  | 2.145  | 1.495  | 1.749  | 0.695  | 1.468  | 338351        | NA       | NM_001081956_X_-_1  |

|               |        |        |        |        |        |        |        |        |        |        |           |          |                     |
|---------------|--------|--------|--------|--------|--------|--------|--------|--------|--------|--------|-----------|----------|---------------------|
| Wfdc17        | 5.415  | 4.776  | 4.564  | 3.778  | 5.178  | 4.648  | 7.975  | 8.247  | 9.319  | 8.916  | 100034251 | NA       | NM_001081957_11_+_1 |
| Klc1          | 2.437  | 2.724  | 3.211  | 2.870  | 3.145  | 2.592  | 3.299  | 3.042  | 4.782  | 4.706  | 16593     | KLC1     | NM_001081959_12_+_1 |
| Clasp2        | 2.218  | 3.011  | -1.879 | -0.315 | -0.360 | 2.039  | -0.774 | 0.725  | -4.234 | 0.466  | 76499     | CLASP2   | NM_001081960_9_+_1  |
| Sap25         | 3.182  | 3.403  | 3.175  | 2.757  | 4.140  | 4.077  | 4.238  | 4.049  | 3.703  | 3.819  | 751865    | SAP25    | NM_001081962_5_+_1  |
| 9430020K01Rik | -2.483 | -0.547 | -0.707 | -0.038 | -1.535 | -0.146 | -0.378 | 0.176  | 0.940  | 1.257  | 240185    | KIAA1462 | NM_001081963_18_+_1 |
| Apol8         | -2.647 | -4.981 | -4.970 | -4.254 | -3.258 | -4.527 | -4.976 | -3.671 | -4.981 | -3.498 | 239552    | APOL2    | NM_001081970_15_+_1 |
| Mfap1b        | 5.716  | 5.913  | 5.679  | 5.597  | 5.955  | 5.958  | 5.840  | 5.857  | 5.839  | 5.716  | 100034361 | MFAP1    | NM_001081975_2_+_1  |
| Rnf144a       | 2.522  | 1.205  | -4.193 | -1.773 | -0.643 | 0.001  | 2.759  | 1.353  | 4.971  | 2.978  | 108089    | RNF144A  | NM_001081977_12_+_1 |
| Amelx         | -2.367 | -4.762 | -4.980 | -4.981 | -4.688 | -1.354 | -3.605 | -4.923 | -4.981 | -4.981 | 11704     | AMELY    | NM_001081978_X_+_1  |
| Mecp2         | 1.889  | 2.145  | 0.978  | 1.031  | 2.051  | 1.872  | 1.453  | 1.961  | 1.394  | 1.473  | 17257     | MECP2    | NM_001081979_X_+_1  |
| Nfix          | -2.580 | -4.981 | -0.784 | -1.125 | -1.752 | -1.231 | -0.579 | -0.364 | 1.060  | 0.270  | 18032     | NFIX     | NM_001081981_8_+_1  |
| Nfix          | 0.001  | -0.106 | 3.252  | 3.515  | 3.296  | 3.783  | 4.575  | 4.362  | 4.549  | 4.526  | 18032     | NFIX     | NM_001081982_8_+_1  |
| Tmsb15b1      | 4.075  | 3.646  | 3.256  | 3.097  | 3.517  | 3.443  | 3.349  | 2.567  | -0.455 | -0.424 | 666244    | NA       | NM_001081983_X_+_1  |
| Popdc2        | -4.981 | -3.408 | -4.861 | -1.943 | -2.646 | -0.965 | -3.308 | -1.090 | -4.639 | -2.844 | 64082     | PODPC2   | NM_001081984_16_+_1 |
| Slc25a53      | 2.357  | 2.461  | 1.792  | 1.340  | 2.219  | 1.672  | 0.981  | 1.096  | 0.284  | 0.199  | 67062     | SLC25A53 | NM_001082412_X_+_1  |
| Sh3d19        | 0.001  | 1.288  | -0.367 | 1.582  | -0.210 | 0.987  | -0.638 | 2.295  | 0.812  | 3.357  | 27059     | SH3D19   | NM_001082414_3_+_1  |
| Ndor1         | 3.977  | 4.163  | 4.413  | 4.121  | 4.579  | 4.471  | 4.774  | 4.550  | 5.285  | 4.809  | 78797     | NDOR1    | NM_001082476_2_+_1  |
| Efr3b         | -3.843 | -1.756 | -2.399 | -3.205 | -1.303 | -2.936 | -2.280 | -4.420 | -3.373 | -4.981 | 668212    | EFR3B    | NM_001082483_12_+_1 |
| Snx27         | 3.041  | 3.315  | 2.678  | 3.142  | 2.872  | 3.002  | 2.607  | 2.931  | 3.814  | 4.508  | 76742     | SNX27    | NM_001082484_3_+_1  |
| Zfp266        | 3.587  | 2.900  | 3.649  | 3.417  | 3.597  | 3.700  | 3.401  | 3.266  | 3.249  | 3.761  | 77519     | ZNF266   | NM_001082485_9_+_1  |
| Pigyl         | 5.474  | 5.444  | 5.121  | 4.856  | 4.897  | 4.897  | 5.145  | 4.919  | 4.285  | 4.212  | 66268     | PIGY     | NM_001082532_9_+_1  |
| Sppl2c        | -4.981 | -4.981 | -4.981 | -4.981 | -4.979 | -4.979 | -4.968 | -4.226 | -4.981 | -4.981 | 237958    | SPPL2C   | NM_001082535_11_+_1 |
| Mkl1          | -0.170 | 1.432  | 1.002  | 1.657  | 2.003  | 1.901  | 2.138  | 1.244  | 1.853  | 2.270  | 223701    | MKL1     | NM_001082536_15_+_1 |
| Stfa2         | -4.981 | -4.981 | -0.779 | -0.854 | -4.937 | -3.328 | -4.862 | -3.258 | -4.981 | -4.981 | 20862     | NA       | NM_001082545_16_+_1 |
| BC100530      | -4.981 | -4.981 | -4.584 | -3.395 | -4.733 | -1.918 | -5.002 | -1.162 | -3.531 | -4.981 | 100034684 | NA       | NM_001082546_16_+_1 |
| Gm5483        | -4.981 | -4.981 | -4.706 | -4.706 | -4.887 | -1.790 | -4.929 | -1.197 | -2.871 | -3.527 | 433016    | CSTA     | NM_001082547_16_+_1 |
| Spint2        | 8.747  | 8.553  | 7.953  | 8.073  | 7.881  | 8.068  | 6.763  | 6.146  | 1.504  | 0.008  | 20733     | SPINT2   | NM_001082548_7_+_1  |
| Trim21        | 2.462  | 1.003  | 1.965  | 1.626  | 1.456  | 0.630  | 2.095  | 1.088  | 3.324  | 2.694  | 20821     | TRIM21   | NM_001082552_7_+_1  |
| Rab27b        | -2.012 | -4.981 | -4.944 | -2.332 | -4.246 | -3.586 | -3.855 | -4.962 | -4.910 | -1.009 | 80718     | RAB27B   | NM_001082553_18_+_1 |
| Itgam         | -1.717 | -1.983 | 0.208  | 0.426  | 5.128  | 4.459  | 6.365  | 6.989  | 8.619  | 8.621  | 16409     | ITGAM    | NM_001082960_7_+_1  |
| Snrpn         | -3.880 | -4.194 | -4.932 | -4.958 | -4.892 | -4.925 | -4.964 | -4.891 | -4.981 | -4.981 | 20646     | SNRPN    | NM_001082961_7_+_1  |
| Snrpn         | -4.231 | -4.478 | -4.963 | -4.977 | -4.938 | -4.961 | -4.972 | -4.943 | -4.981 | -4.981 | 20646     | SNRPN    | NM_001082962_7_+_1  |
| Neurl2        | 3.457  | 2.917  | 0.631  | 0.435  | 3.177  | 3.243  | 2.795  | 2.655  | 3.258  | 2.978  | 415115    | NEURL2   | NM_001082974_2_+_1  |
| Sdr39u1       | 5.460  | 5.289  | 4.653  | 4.697  | 4.774  | 4.868  | 3.722  | 3.727  | 2.837  | 2.865  | 654795    | SDR39U1  | NM_001082975_14_+_1 |
| Tc2n          | -1.035 | -2.616 | -2.028 | -4.663 | -2.397 | -4.216 | -2.419 | -3.861 | -3.392 | -3.392 | 74413     | TC2N     | NM_001082976_12_+_1 |
| Pja1          | 4.833  | 5.393  | 4.304  | 5.256  | 4.053  | 5.291  | 3.938  | 4.838  | 4.281  | 4.722  | 18744     | PJA1     | NM_001083110_X_+_1  |
| Pphln1        | 1.133  | 2.704  | 1.631  | 1.456  | 2.691  | 2.298  | 2.344  | 1.352  | 1.526  | 2.370  | 223828    | PPHLN1   | NM_001083114_15_+_1 |
| Terf2         | 2.076  | 1.627  | 1.872  | 1.566  | 2.162  | 1.936  | 1.816  | 1.597  | 1.823  | 1.404  | 21750     | TERF2    | NM_001083118_8_+_1  |
| Ptpru         | -4.981 | -4.981 | -4.981 | -4.981 | -4.835 | -4.814 | -4.980 | -4.969 | -3.179 | -3.038 | 19273     | PTPRU    | NM_001083119_4_+_1  |
| Enah          | -4.981 | -4.282 | -2.059 | -4.628 | -2.640 | -2.547 | -1.978 | -1.354 | -3.593 | -1.695 | 13800     | ENAH     | NM_001083120_1_+_1  |
| Enah          | -4.981 | -1.952 | 0.650  | 1.234  | -1.764 | -4.169 | -2.077 | -0.453 | -2.819 | -3.245 | 13800     | ENAH     | NM_001083121_1_+_1  |
| Lig1          | -2.480 | -0.650 | 0.264  | 0.340  | -0.385 | 0.900  | 0.546  | 0.755  | 0.402  | -0.868 | 16881     | LIG1     | NM_001083188_7_+_1  |
| Gbp7          | 1.346  | -0.575 | 0.059  | 1.938  | 4.012  | 4.105  | 3.636  | 4.660  | 5.101  | 5.103  | 229900    | GBP7     | NM_001083312_3_+_1  |
| St7           | -4.838 | -4.746 | -4.228 | -1.002 | -2.770 | -0.860 | 0.125  | 0.018  | 0.803  | -0.185 | 64213     | ST7      | NM_001083315_6_+_1  |
| Pdgfra        | -4.981 | -4.981 | -4.983 | -3.563 | -4.963 | -4.761 | -4.948 | -4.816 | -4.981 | -4.981 | 18595     | PDGFRA   | NM_001083316_5_+_1  |
| Slc35a4       | 4.991  | 4.669  | 4.474  | 4.016  | 4.196  | 4.088  | 4.939  | 4.466  | 5.061  | 4.736  | 67843     | SLC35A4  | NM_001083317_18_+_1 |
| Etv3          | 1.709  | 2.941  | 5.486  | 5.339  | 5.557  | 5.397  | 4.936  | 4.621  | 3.784  | 4.383  | 27049     | ETV3     | NM_001083318_3_+_1  |
| Ubp1          | 3.278  | 4.245  | 4.447  | 4.398  | 4.973  | 4.949  | 4.373  | 4.508  | 5.708  | 5.391  | 22221     | UBP1     | NM_001083319_9_+_1  |
| Klrlk1        | 3.669  | 3.221  | 6.764  | 6.819  | 4.051  | 4.917  | 6.852  | 7.132  | 3.465  | 4.254  | 27007     | NA       | NM_001083322_6_+_1  |
| Mtg2          | 2.022  | 1.327  | 0.682  | 0.098  | 0.995  | 0.451  | 0.954  | -0.330 | 1.016  | 0.709  | 52856     | MTG2     | NM_001083328_2_+_1  |
| Mtg2          | -0.493 | -1.054 | 0.328  | -0.654 | 1.013  | 0.283  | 0.887  | 0.332  | 0.339  | 0.128  | 52856     | MTG2     | NM_001083329_2_+_1  |
| Nup88         | 0.996  | -1.017 | 1.412  | 0.288  | 0.916  | 0.287  | 0.662  | 0.718  | 1.616  | 0.984  | 19069     | NUP88    | NM_001083331_11_+_1 |
| Bin1          | 5.416  | 5.807  | 5.261  | 5.368  | 6.939  | 7.031  | 6.426  | 6.520  | 4.425  | 4.987  | 30948     | BIN1     | NM_001083334_18_+_1 |
| Mboat2        | -4.981 | -2.995 | -4.059 | -0.948 | -1.690 | -2.008 | -3.955 | -0.985 | -3.630 | -2.537 | 67216     | MBOAT2   | NM_001083341_12_+_1 |
| Ptchd3        | -4.981 | -4.981 | -4.969 | -4.969 | -4.983 | -4.863 | -4.225 | -4.949 | -4.981 | -4.981 | 242748    | DISP3    | NM_001083342_4_+_1  |
| Tns3          | 4.099  | 4.283  | 5.465  | 5.129  | 5.759  | 5.654  | 5.197  | 4.813  | 4.482  | 4.453  | 319939    | TNS3     | NM_001083587_11_+_1 |
| Cacna1d       | -0.412 | 0.953  | -4.239 | -3.708 | -4.817 | -4.909 | -3.936 | -2.521 | -3.842 | -4.260 | 12289     | CACNA1D  | NM_001083616_14_+_1 |
| Ttll9         | -4.981 | -4.981 | 0.658  | -4.026 | -3.627 | -4.951 | -2.800 | -4.830 | -4.981 | -3.480 | 74711     | TTL9     | NM_001083618_2_+_1  |
| Greb1l        | -2.030 | -1.435 | -2.991 | -2.220 | -3.902 | -2.333 | -2.608 | -3.983 | -4.190 | -4.342 | 381157    | GREB1L   | NM_001083628_18_+_1 |
| Rusc1         | -4.981 | -2.226 | -1.502 | -1.301 | -2.282 | -4.456 | -2.081 | -4.972 | -4.981 | -2.938 | 72296     | RUSC1    | NM_001083807_3_+_1  |
| Rusc1         | 4.528  | 4.562  | 4.418  | 4.268  | 4.717  | 4.709  | 4.343  | 4.241  | 3.869  | 3.919  | 72296     | RUSC1    | NM_001083808_3_+_1  |
| Slc43a1       | -1.319 | 0.764  | -2.771 | 0.673  | -1.683 | 1.880  | -1.471 | 2.465  | -0.615 | 0.275  | 72401     | SLC43A1  | NM_001083809_2_+_1  |
| Prr5l         | 1.337  | 0.695  | 4.393  | 5.110  | 2.218  | 3.086  | 4.996  | 5.180  | 5.296  | 5.597  | 72446     | PRR5L    | NM_001083810_2_+_1  |
| 1600012H06Rik | -3.319 | -1.153 | 1.002  | 0.895  | 0.787  | 0.916  | 0.469  | -0.144 | 1.738  | 1.196  | 67912     | C6orf120 | NM_001083880_17_+_1 |
| 1600012H06Rik | -0.917 | 1.979  | 1.457  | 2.414  | 0.525  | -0.758 | 1.525  | 0.382  | 2.392  | 1.377  | 67912     | C6orf120 | NM_001083881_17_+_1 |
| 1600012H06Rik | 4.430  | 4.080  | 3.845  | 3.692  | 3.103  | 3.737  | 3.525  | 4.061  | 4.203  | 4.117  | 67912     | C6orf120 | NM_001083882_17_+_1 |
| Pars2         | -1.091 | -0.869 | -1.952 | -0.625 | -0.740 | -1.957 | -2.588 | -1.200 | -0.796 | -0.481 | 230577    | PARS2    | NM_001083887_4_+_1  |
| Ndufv3        | 6.749  | 6.445  | 6.206  | 6.089  | 6.109  | 5.938  | 6.355  | 5.970  | 5.283  | 4.847  | 78330     | NDUFV3   | NM_001083891_17_+_1 |
| Liph          | -4.419 | -4.981 | -4.880 | -4.784 | -4.307 | -4.219 | -3.814 | -3.243 | -3.134 | -1.628 | 239759    | LIPH     | NM_001083894_16_+_1 |
| MPzl1         | 1.916  | -0.062 | 2.077  | 2.050  | 2.659  | 2.268  | 1.365  | 1.911  | -0.690 | -4.654 | 68481     | MPZL1    | NM_001083897_1_+_1  |
| Mfsd14b       | 3.321  | 3.468  | 4.517  | 3.873  | 3.858  | 4.174  | 3.959  | 3.641  | 4.655  | 5.323  | 66631     | MFSD14B  | NM_001083901_13_+_1 |
| Slc12a8       | -0.993 | -0.614 | -0.427 | -0.039 | -4.882 | -3.459 | -3.634 | -4.612 | -2.810 | -3.753 | 171286    | SLC12A8  | NM_001083902_16_+_1 |
| Sbsn          | 1.022  | -0.447 | -1.319 | -4.101 | 0.790  | -2.377 | 0.415  | -3.397 | 0.275  | -3.013 | 282619    | SBSN     | NM_001083903_7_+_1  |
| Nr3c2         | 2.335  | 1.427  | -3.380 | -2.614 | -1.380 | 0.532  | -3.940 | -1.499 | -4.981 | -3.131 | 110784    | NR3C2    | NM_001083906_8_+_1  |

|               |        |        |        |        |        |        |        |        |        |        |           |           |                         |
|---------------|--------|--------|--------|--------|--------|--------|--------|--------|--------|--------|-----------|-----------|-------------------------|
| Plekhhg2      | -0.007 | 0.465  | 1.197  | 0.766  | 1.113  | 1.815  | 2.069  | 1.027  | 2.429  | 2.355  | 101497    | PLEKHG2   | NM_001083912_7_-1       |
| Kdf1          | -4.981 | -4.981 | -4.402 | -4.549 | -4.843 | -4.925 | -4.981 | -4.941 | -4.981 | -4.981 | 69073     | KDF1      | NM_001083916_4_+1       |
| Scn3b         | -4.981 | -4.981 | -4.923 | -3.180 | -4.910 | -4.494 | -4.814 | -4.798 | -2.498 | -4.981 | 235281    | SCN3B     | NM_001083917_9_+1       |
| Zfp991        | 3.945  | 4.611  | 2.773  | 3.620  | 3.048  | 3.557  | 3.922  | 3.900  | 3.313  | 3.828  | 666532    | ZNF616    | NM_001083918_4_+2       |
| Zfp991        | 4.211  | 1.798  | 3.659  | 0.775  | 4.133  | 0.510  | 4.680  | 1.446  | 4.057  | 2.268  | 666532    | ZNF616    | NM_001083918_dup1_4_+1  |
| Rbck1         | 6.721  | 6.608  | 6.966  | 6.791  | 7.176  | 7.056  | 6.983  | 6.914  | 7.314  | 7.010  | 24105     | RBCK1     | NM_001083921_2_-1       |
| Wbp1          | 3.986  | 4.011  | 3.989  | 3.960  | 3.216  | 3.320  | 3.222  | 2.445  | 2.208  | 2.044  | 22377     | WBP1      | NM_001083922_6_-1       |
| Wbp1          | 3.990  | 3.683  | 4.101  | 4.344  | 3.750  | 3.935  | 3.282  | 3.018  | 2.656  | 2.230  | 22377     | WBP1      | NM_001083923_6_-1       |
| Oas1b         | -0.581 | -1.327 | -0.667 | -2.065 | 2.205  | 1.610  | 1.299  | 0.431  | 2.062  | 0.570  | 23961     | NA        | NM_001083925_5_+1       |
| Tle3          | 3.134  | 2.084  | 2.647  | 2.445  | 2.412  | 2.761  | 2.825  | 1.047  | 3.750  | 3.832  | 21887     | TLE3      | NM_001083927_9_+1       |
| Tle3          | 3.416  | 2.512  | 2.794  | 3.328  | 3.676  | 2.869  | 3.139  | 3.255  | 4.331  | 4.336  | 21887     | TLE3      | NM_001083928_9_+1       |
| Myom1         | -2.323 | 0.100  | -3.326 | -0.656 | -1.470 | -2.243 | -3.444 | -2.577 | -4.304 | -4.680 | 17929     | MYOM1     | NM_001083934_17_+1      |
| Pth1r         | -2.745 | -3.542 | -2.090 | -2.997 | -3.169 | -3.683 | -3.321 | -3.894 | -3.689 | -3.191 | 19228     | PTH1R     | NM_001083935_9_-1       |
| Pth1r         | -4.275 | -4.032 | -4.058 | -3.551 | -4.684 | -4.894 | -4.380 | -4.670 | -4.416 | -4.380 | 19228     | PTH1R     | NM_001083936_9_-1       |
| Slc35a2       | 4.069  | 3.917  | 3.708  | 3.898  | 3.896  | 3.652  | 3.775  | 4.014  | 4.653  | 4.609  | 22232     | NA        | NM_001083937_X_+1       |
| Rnaset2a      | 10.299 | 10.833 | 8.571  | 9.928  | 7.749  | 8.923  | 7.894  | 9.083  | 7.930  | 8.546  | 100037283 | RNASET2   | NM_001083938_17_-1      |
| Rsph3b        | 4.479  | 3.587  | 4.492  | 3.030  | 3.136  | 1.985  | 3.553  | 2.501  | 3.785  | 2.434  | 100037282 | RSPH3     | NM_001083945_17_-1      |
| Hba-a2        | 5.212  | 9.061  | 6.478  | 10.204 | 6.812  | 11.072 | 6.975  | 10.641 | 4.953  | 8.918  | 110257    | HBA1 HBA2 | NM_001083955_11_+1      |
| Hba-a2        | 4.739  | 1.603  | 5.998  | 2.574  | 5.963  | 4.090  | 5.879  | 1.335  | 4.203  | 0.443  | 110257    | HBA1 HBA2 | NM_001083955_dup1_11_+1 |
| Car1          | -1.853 | -3.355 | -2.950 | -1.588 | -4.592 | -1.059 | -2.882 | -2.581 | -4.723 | -4.305 | 12346     | CA1       | NM_001083957_3_-1       |
| Zfp655        | 4.681  | 4.683  | 4.022  | 3.861  | 3.462  | 3.434  | 3.459  | 3.253  | 3.179  | 3.172  | 72611     | ZNF655    | NM_001083958_5_+1       |
| Spo11         | -3.967 | -4.981 | -4.319 | -3.382 | -4.747 | -4.956 | -4.827 | -4.864 | -4.868 | -4.981 | 26972     | SPO11     | NM_001083959_2_+1       |
| Spo11         | -2.618 | -4.981 | -0.998 | -0.935 | -3.918 | -3.829 | -4.728 | -4.784 | -4.655 | -4.981 | 26972     | SPO11     | NM_001083960_2_+1       |
| Tcf4          | 8.535  | 8.828  | 4.813  | 4.908  | 4.845  | 4.732  | 4.620  | 5.111  | 4.891  | 4.853  | 21413     | TCF4      | NM_001083967_18_+1      |
| Arid1b        | 4.890  | 4.548  | 5.589  | 5.355  | 5.570  | 5.136  | 5.407  | 5.033  | 5.826  | 5.656  | 239985    | ARID1B    | NM_001083955_17_+1      |
| Mcc           | -0.761 | -0.532 | -2.354 | -0.447 | 1.087  | 1.415  | 0.134  | 0.192  | -0.520 | 0.570  | 328949    | MCC       | NM_001085373_18_-1      |
| Mcc           | -3.055 | -1.118 | -1.032 | -1.293 | -4.938 | -1.217 | -2.974 | -1.406 | -4.981 | -2.242 | 328949    | MCC       | NM_001085374_18_-1      |
| Pappa2        | -4.981 | -2.883 | -4.817 | -3.444 | -0.542 | -0.486 | -4.369 | -4.898 | -4.981 | -2.452 | 23850     | PAPPA2    | NM_001085376_1_-1       |
| Myh7b         | -3.843 | -4.981 | -2.584 | -0.783 | -4.147 | -4.580 | -4.845 | -1.362 | -3.823 | -3.435 | 668940    | MYH7B     | NM_001085378_2_+1       |
| Anxa9         | -1.850 | -3.557 | -3.334 | -3.876 | -4.048 | -4.711 | -4.179 | -4.364 | -4.535 | -4.905 | 71790     | ANXA9     | NM_001085383_3_-1       |
| 1600014C10Rik | -1.418 | -3.950 | -1.646 | -0.569 | -0.707 | -0.448 | -1.197 | -1.301 | 3.217  | 3.954  | 72244     | C19orf12  | NM_001085385_7_+1       |
| Dusp5         | 5.265  | 5.528  | 4.918  | 5.267  | 6.041  | 6.026  | 5.641  | 4.723  | 5.277  | 4.391  | 240672    | DUSP5     | NM_001085390_19_+1      |
| Sdccag3       | 4.280  | 4.270  | 4.119  | 4.579  | 3.983  | 4.365  | 4.056  | 4.117  | 4.261  | 4.844  | 68112     | SDCCAG3   | NM_001085407_2_-1       |
| Sdccag3       | 5.175  | 5.457  | 5.377  | 5.228  | 5.619  | 5.345  | 5.420  | 5.277  | 5.844  | 5.709  | 68112     | SDCCAG3   | NM_001085408_2_-1       |
| Steap3        | -4.931 | -4.981 | -4.740 | -4.911 | -4.865 | -2.649 | -4.365 | -3.070 | -4.779 | -2.298 | 68428     | STEAP3    | NM_001085409_1_-1       |
| Nadk2         | -4.381 | 0.012  | 1.370  | 0.008  | -1.005 | -3.782 | 0.084  | -0.794 | 0.784  | 0.692  | 68646     | NADK2     | NM_001085410_15_+1      |
| Zfp467        | 1.899  | 2.431  | 1.860  | 2.914  | 3.425  | 3.231  | 3.244  | 2.928  | 3.582  | 3.966  | 68910     | ZNF467    | NM_001085415_6_-1       |
| Zfp467        | 0.289  | -0.001 | -0.090 | -0.071 | -0.362 | -0.192 | 0.987  | -4.767 | 0.566  | 1.122  | 68910     | ZNF467    | NM_001085416_6_-1       |
| Zfp467        | 3.895  | 3.711  | 1.327  | 2.200  | 3.210  | 3.262  | 3.453  | 2.828  | 3.163  | 3.143  | 68910     | ZNF467    | NM_001085417_6_-1       |
| Gm13102       | -3.934 | -2.000 | -2.715 | -3.562 | -3.317 | -3.782 | -3.470 | -3.211 | -3.864 | -4.542 | 100041077 | NA        | NM_001085419_4_+1       |
| Tspyl5        | -3.099 | -1.668 | -1.883 | 0.333  | 0.508  | 2.058  | -2.174 | -0.883 | -4.981 | -4.981 | 239364    | TSPYL5    | NM_001085421_15_-1      |
| Smcr8         | 3.347  | 3.779  | 3.851  | 4.055  | 4.104  | 4.144  | 3.989  | 3.716  | 4.120  | 4.352  | 237782    | SMCR8     | NM_001085440_11_+1      |
| Ctnnd1        | -0.813 | -4.072 | -0.427 | -3.525 | -4.708 | -3.687 | -1.617 | -4.614 | -2.130 | -2.455 | 12388     | CTNND1    | NM_001085448_2_-1       |
| Ctnnd1        | -4.742 | -1.260 | 2.042  | 1.856  | -0.675 | 0.073  | 0.441  | 1.563  | 3.232  | 4.123  | 12388     | CTNND1    | NM_001085449_2_-1       |
| Ctnnd1        | -3.215 | -3.951 | 2.043  | 1.576  | -2.148 | -1.411 | 1.388  | -0.381 | 2.969  | 3.840  | 12388     | CTNND1    | NM_001085450_2_-1       |
| Ctnnd1        | 0.013  | -1.722 | 2.738  | 2.547  | -0.337 | 0.004  | 1.718  | 3.215  | 4.382  | 5.171  | 12388     | CTNND1    | NM_001085453_2_-1       |
| Acin1         | 2.855  | 1.033  | 0.338  | -1.665 | -0.524 | -0.461 | -0.151 | 0.587  | -1.498 | -1.921 | 56215     | ACIN1     | NM_001085472_14_-1      |
| Acin1         | 4.318  | 3.222  | 4.007  | 3.014  | 4.281  | 4.210  | 4.027  | 3.643  | 2.955  | 2.625  | 56215     | ACIN1     | NM_001085473_14_-1      |
| Fam229a       | -4.981 | -4.981 | -4.561 | -4.159 | -4.890 | -4.772 | -4.763 | -4.892 | -3.738 | -4.981 | 68233     | FAM229A   | NM_001085491_4_+1       |
| Rere          | 5.030  | 4.686  | 5.189  | 4.965  | 5.458  | 5.754  | 5.430  | 5.325  | 5.798  | 5.672  | 68703     | RERE      | NM_001085492_4_+1       |
| Ndufaf6       | 4.270  | 3.845  | 4.779  | 4.448  | 3.417  | 3.430  | 3.313  | 3.251  | 2.553  | 2.254  | 76947     | NDUFAF6   | NM_001085493_4_-1       |
| Arfgef2       | 4.500  | 4.476  | 4.282  | 4.053  | 4.783  | 4.829  | 4.164  | 3.859  | 4.180  | 4.282  | 99371     | ARFGEF2   | NM_001085495_2_+1       |
| Slc25a43      | 0.134  | -1.018 | 1.604  | 2.062  | 0.365  | 0.298  | 1.018  | 1.237  | 1.935  | 2.351  | 194744    | SLC25A43  | NM_001085497_X_+1       |
| Chmp6         | 5.843  | 5.569  | 5.106  | 5.273  | 4.989  | 4.967  | 5.191  | 5.121  | 5.442  | 5.058  | 208092    | CHMP6     | NM_001085498_11_+1      |
| Cisd3         | 4.194  | 3.082  | 4.052  | 3.645  | 2.179  | 1.668  | 3.331  | 2.864  | 2.892  | 2.258  | 217149    | CISD3     | NM_001085500_11_+1      |
| Ppp1r3d       | 0.814  | 0.363  | -0.653 | -0.641 | -0.075 | 0.064  | 0.210  | 0.848  | 2.834  | 2.811  | 228966    | PPP1R3D   | NM_001085501_2_-1       |
| Gm572         | -4.981 | -1.773 | -4.327 | -4.952 | -4.194 | -4.281 | -4.970 | -4.734 | -4.981 | -4.981 | 230909    | C1orf127  | NM_001085505_4_+1       |
| Zbtb34        | -2.189 | 0.750  | 2.352  | 1.075  | 1.541  | 1.358  | 0.368  | -0.031 | 3.689  | 3.352  | 241311    | ZBTB34    | NM_001085507_2_-1       |
| Tmem8b        | 2.369  | 2.112  | 1.094  | 0.966  | 1.357  | 1.696  | 0.319  | 0.488  | -0.242 | 0.341  | 242409    | TMEM8B    | NM_001085508_4_+1       |
| Myom3         | -2.573 | -4.981 | -4.970 | -4.970 | -4.842 | -4.921 | -4.933 | -4.957 | -4.981 | -4.981 | 242702    | MYOM3     | NM_001085509_4_+1       |
| Al464131      | -4.981 | -2.437 | -3.150 | -2.376 | -4.907 | -4.124 | -4.838 | -3.121 | -3.181 | -0.403 | 329828    | KIAA1161  | NM_001085515_4_-1       |
| Gm14085       | -2.042 | -3.267 | -3.623 | -2.137 | -2.462 | -0.491 | -0.883 | 1.544  | -1.324 | 3.086  | 381417    | NA        | NM_001085518_2_+1       |
| Zfp992        | 2.683  | 2.713  | 1.711  | 0.207  | 2.018  | 0.995  | 2.385  | 0.643  | 3.011  | 2.186  | 433791    | ZNF616    | NM_001085522_4_+1       |
| Fam205a2      | -3.818 | -3.267 | -4.401 | -3.398 | -4.413 | -4.428 | -4.787 | -4.817 | -4.166 | -4.981 | 545611    | FAM205A   | NM_001085530_4_+1       |
| Fam205a2      | -3.818 | -3.267 | -4.346 | -3.498 | -4.413 | -4.428 | -4.787 | -4.817 | -4.166 | -4.981 | 545611    | FAM205A   | NM_001085530_dup1_4_+2  |
| Fam205a2      | -3.818 | -3.267 | -4.346 | -3.498 | -4.413 | -4.428 | -4.787 | -4.817 | -4.166 | -4.981 | 545611    | FAM205A   | NM_001085530_dup2_4_-1  |
| Gm13276       | -4.938 | -3.148 | -3.830 | -4.599 | -4.961 | -4.968 | -4.608 | -4.146 | -3.192 | -2.644 | 545649    | NA        | NM_001085532_4_+1       |
| Gm13275       | -0.721 | -0.020 | -3.926 | -4.755 | -4.727 | -3.340 | -4.518 | -4.307 | -4.849 | -2.287 | 545652    | NA        | NM_001085533_4_+1       |
| Gm13275       | -2.483 | -2.151 | -3.986 | -4.945 | -4.899 | -4.916 | -4.855 | -4.962 | -4.096 | -4.223 | 545652    | NA        | NM_001085533_dup1_4_+1  |
| Gm14393       | -4.981 | -3.191 | -3.129 | -4.184 | -4.267 | -4.895 | -4.774 | -4.865 | -3.998 | -4.981 | 664987    | NA        | NM_001085546_2_-1       |
| Trabd2b       | -1.442 | -4.981 | 3.079  | 2.722  | -4.960 | -4.877 | -4.891 | -3.812 | -4.981 | -4.981 | 666048    | TRABD2B   | NM_001085549_4_+1       |
| Tcp11         | -2.443 | -4.981 | -3.920 | -3.959 | -3.965 | -4.311 | -4.274 | -4.302 | -1.322 | -2.532 | 21463     | TCP11     | NM_001085555_17_-1      |
| Mpz13         | 1.824  | 1.331  | 2.527  | 2.516  | 2.168  | 2.096  | 1.552  | 1.420  | 0.265  | 2.070  | 319742    | MPZ13     | NM_001093749_9_+1       |
| Ptchd1        | -1.169 | 0.870  | 1.857  | 1.905  | 4.975  | 5.334  | 4.892  | 4.707  | 1.692  | 2.558  | 211612    | PTCHD1    | NM_001093750_X_-1       |

|               |        |        |        |        |        |        |        |        |        |        |           |           |                         |
|---------------|--------|--------|--------|--------|--------|--------|--------|--------|--------|--------|-----------|-----------|-------------------------|
| Srsf11        | 7.125  | 7.081  | 7.676  | 7.594  | 7.211  | 7.145  | 7.020  | 6.877  | 6.406  | 6.605  | 69207     | SRSF11    | NM_001093752_3_-1       |
| Srsf11        | 6.002  | 6.164  | 7.686  | 7.450  | 6.983  | 7.076  | 6.727  | 6.234  | 5.554  | 5.317  | 69207     | SRSF11    | NM_001093753_3_-1       |
| Dennd2d       | 4.616  | 3.925  | 4.047  | 4.244  | 2.834  | 2.558  | 2.066  | 3.116  | 0.649  | 0.422  | 72121     | DENND2D   | NM_001093754_3_+1       |
| Ogfod1        | -4.386 | -4.076 | -4.748 | -4.813 | -4.697 | -3.792 | -1.785 | -4.852 | -3.876 | -4.544 | 270086    | OGFOD1    | NM_001093757_8_+1       |
| Trappc13      | 3.931  | 4.139  | 3.934  | 3.817  | 3.661  | 3.558  | 3.362  | 3.190  | 4.222  | 4.186  | 66975     | TRAPPC13  | NM_001093759_13_-1      |
| Trappc13      | 3.285  | 4.133  | 3.911  | 3.962  | 3.490  | 3.514  | 3.907  | 3.836  | 3.931  | 4.349  | 66975     | TRAPPC13  | NM_001093760_13_-1      |
| Myadm         | 0.117  | -1.139 | 2.135  | 2.660  | 2.949  | 2.976  | 2.377  | 0.922  | 3.222  | 2.963  | 50918     | MYADM     | NM_001093764_7_+1       |
| Myadm         | 2.144  | 4.071  | 3.766  | 3.529  | 5.477  | 5.834  | 4.637  | 5.430  | 6.792  | 7.322  | 50918     | MYADM     | NM_001093765_7_+1       |
| Myadm         | 3.616  | 3.841  | 6.801  | 6.815  | 6.701  | 6.889  | 7.039  | 7.078  | 8.219  | 8.230  | 50918     | MYADM     | NM_001093766_7_+1       |
| Myt1l         | -4.981 | -4.981 | -4.978 | -4.743 | -4.906 | -4.953 | -4.981 | -4.941 | -4.981 | -4.981 | 17933     | MYT1L     | NM_001093775_12_+1      |
| Myt1l         | -4.981 | -4.981 | -4.974 | -4.017 | -4.774 | -4.969 | -4.985 | -4.787 | -4.981 | -4.981 | 17933     | MYT1L     | NM_001093776_12_+1      |
| Myt1l         | -4.981 | -4.981 | -4.978 | -4.729 | -4.902 | -4.952 | -4.982 | -4.938 | -4.981 | -4.981 | 17933     | MYT1L     | NM_001093778_12_+1      |
| C1s1          | -4.981 | -1.737 | -2.552 | -4.984 | -4.975 | -3.945 | -4.274 | -4.950 | -4.981 | -4.981 | 50908     | C1S       | NM_001097617_6_-1       |
| Trerf1        | -3.980 | 0.273  | 2.963  | 2.852  | 3.606  | 3.280  | 2.970  | 1.818  | 2.502  | 2.124  | 224829    | TRERF1    | NM_001097623_17_+1      |
| Ccnyl1        | 1.122  | 2.687  | 3.250  | 3.220  | 1.050  | 2.401  | 1.717  | 2.653  | 2.200  | 3.222  | 227210    | CCNYL1    | NM_001097644_1_+1       |
| Hist1h2bq     | -2.360 | -2.243 | -0.814 | -0.481 | -1.148 | -0.318 | -0.542 | -2.349 | -1.927 | -1.550 | 665596    | HIST1H2BH | NM_001097979_13_-1      |
| Hist1h2bq     | -2.574 | -1.027 | -1.016 | -0.347 | -0.695 | -1.792 | -1.510 | -1.473 | -0.868 | -2.933 | 665596    | HIST1H2BH | NM_001097979_dup1_13_+1 |
| Asap2         | -1.887 | -2.359 | 0.484  | -1.922 | -4.214 | -1.030 | -1.802 | -2.290 | -1.703 | -4.273 | 211914    | ASAP2     | NM_001098168_12_+1      |
| Hic1          | -1.560 | -4.981 | 3.162  | 1.421  | 4.581  | 4.395  | 2.849  | 1.505  | -0.603 | -0.722 | 15248     | HIC1      | NM_001098203_11_-1      |
| Bhlhb9        | 4.696  | 4.516  | 2.747  | 3.062  | 3.904  | 4.121  | 2.837  | 3.235  | 0.615  | 1.173  | 70237     | BHLHB9    | NM_001098222_X_+1       |
| Adam22        | 1.040  | -0.624 | 3.355  | 3.960  | 4.300  | 4.540  | 3.921  | 3.189  | 0.654  | -3.491 | 11496     | ADAM22    | NM_001098225_5_-1       |
| Tead3         | -4.981 | -4.981 | -4.538 | -4.710 | -4.971 | -4.971 | -4.989 | -4.990 | -4.981 | -4.981 | 21678     | TEAD3     | NM_001098226_17_-1      |
| Sdcbp         | 8.559  | 8.254  | 8.454  | 8.351  | 8.209  | 7.910  | 8.710  | 8.834  | 9.317  | 9.417  | 53378     | SDCBP     | NM_001098227_4_+1       |
| Pdp1          | -3.529 | -2.557 | -3.836 | -4.281 | -4.316 | -4.825 | -1.682 | -2.110 | -4.068 | -4.249 | 381511    | PDP1      | NM_001098230_4_-1       |
| Pdp1          | 0.435  | 0.715  | 0.148  | -1.858 | -0.778 | -2.560 | -1.208 | -0.838 | -3.260 | -0.659 | 381511    | PDP1      | NM_001098231_4_-1       |
| Purg          | 0.440  | 0.163  | 1.155  | -0.086 | 1.007  | 0.052  | 0.011  | 0.047  | 1.088  | 1.068  | 75029     | PURG      | NM_001098233_8_+1       |
| Zbtb3         | -0.680 | -0.889 | 0.882  | 1.271  | 1.281  | 0.910  | -0.981 | -0.147 | 0.488  | 0.633  | 75291     | ZBTB3     | NM_001098237_19_+1      |
| Ttl2          | -4.981 | -4.981 | -4.948 | -4.288 | -4.896 | -3.223 | -4.918 | -4.759 | -4.981 | -4.981 | 100216474 | TTL2      | NM_001098267_17_-1      |
| Tmem176a      | -0.562 | -2.635 | 2.539  | 2.336  | 3.276  | 3.418  | 4.556  | 4.550  | 0.680  | 0.795  | 66058     | TMEM176A  | NM_001098271_6_+1       |
| Sp3           | 6.145  | 6.625  | 4.498  | 4.632  | 4.643  | 5.127  | 5.178  | 5.007  | 6.329  | 6.781  | 20687     | SP3       | NM_001098425_2_-1       |
| Grsf1         | 5.192  | 5.116  | 5.214  | 5.297  | 5.008  | 4.953  | 4.837  | 4.855  | 5.631  | 5.627  | 231413    | GRSF1     | NM_001098476_5_-1       |
| Pwwp2b        | -2.555 | -0.985 | -2.546 | -2.594 | -3.985 | -4.103 | -1.492 | -0.427 | 0.961  | 1.251  | 101631    | PWWP2B    | NM_001098636_7_+1       |
| Klrc2         | -4.981 | -3.404 | -4.957 | -4.093 | -4.414 | -3.331 | -4.600 | -3.360 | -3.320 | -4.981 | 16642     | NA        | NM_001098669_6_-1       |
| Yy2           | 2.467  | 2.424  | 2.534  | 2.230  | 2.031  | 2.261  | 1.816  | 1.837  | 2.368  | 2.388  | 100073351 | YY2       | NM_001098723_X_-1       |
| Tox2          | -1.376 | -1.051 | -2.345 | -1.061 | 0.047  | -0.697 | -1.334 | -1.764 | -2.946 | -4.342 | 269389    | TOX2      | NM_001098799_2_+1       |
| Pthr2         | 4.908  | 4.441  | 4.517  | 4.311  | 4.404  | 4.350  | 4.599  | 4.452  | 3.357  | 3.214  | 217057    | PTRH2     | NM_001098810_11_+1      |
| Atxn7l3       | -2.997 | 1.240  | 1.592  | 2.053  | 2.239  | 2.246  | 0.398  | 1.712  | 1.926  | 1.211  | 217218    | ATXN7L3   | NM_001098836_11_-1      |
| Atxn7l3       | 2.759  | 2.446  | 3.079  | 2.829  | 3.117  | 3.050  | 3.480  | 2.835  | 3.798  | 4.051  | 217218    | ATXN7L3   | NM_001098837_11_-1      |
| Gm13277       | -0.498 | -4.981 | -3.866 | -4.614 | -4.945 | -4.748 | -4.619 | -4.925 | -4.499 | -4.981 | 545650    | NA        | NM_001098840_4_+1       |
| Gm13278       | -2.678 | -4.498 | -4.125 | -4.279 | -4.738 | -4.965 | -4.616 | -4.948 | -4.499 | -4.937 | 545651    | NA        | NM_001098841_4_+1       |
| Gm13278       | -4.981 | -4.498 | -4.125 | -4.279 | -4.738 | -4.965 | -4.616 | -4.948 | -4.499 | -4.937 | 545651    | NA        | NM_001098841_dup1_4_+1  |
| Ly6c2         | 13.068 | 10.226 | 5.555  | 3.777  | 1.590  | 1.066  | 3.755  | 3.476  | 11.067 | 8.106  | 100041546 | NA        | NM_001099217_15_-1      |
| Tekt5         | -4.981 | -4.981 | -4.936 | -4.171 | -4.962 | -4.939 | -4.754 | -4.973 | -4.981 | -4.342 | 70426     | TEKT5     | NM_001099275_16_-1      |
| Pik3c2b       | -3.381 | -3.208 | 0.219  | -0.419 | -1.776 | 0.235  | -0.417 | 1.544  | -0.461 | -1.179 | 240752    | PIK3C2B   | NM_001099276_1_+1       |
| Zfp541        | -2.071 | -4.981 | -4.932 | -4.932 | -3.641 | -3.695 | -3.934 | -3.216 | 0.832  | 0.407  | 666528    | ZNF541    | NM_001099277_7_+1       |
| Arhgap44      | -1.699 | -1.752 | -2.208 | -2.725 | -4.289 | -4.067 | -3.605 | -4.391 | -2.419 | -4.395 | 216831    | ARHGAP44  | NM_001099288_11_-1      |
| Scn2a         | -4.981 | 0.181  | -4.981 | -4.981 | -4.441 | -4.956 | -4.955 | -4.866 | -4.981 | -3.882 | 110876    | SCN2A     | NM_001099298_2_+1       |
| Gm14391       | 0.890  | 0.525  | -2.459 | -0.725 | -1.486 | -0.859 | -0.914 | -0.283 | -4.069 | -1.749 | 665001    | ZNF442    | NM_001099308_2_-1       |
| Gm14391       | 0.524  | 1.419  | -2.123 | -0.378 | -0.213 | 0.376  | -0.831 | -2.093 | -3.936 | 0.169  | 665001    | ZNF442    | NM_001099308_dup1_2_+1  |
| Tmem35b       | 5.767  | 5.459  | 4.355  | 4.616  | 4.546  | 5.216  | 4.426  | 4.485  | 3.058  | 3.211  | 100039968 | TMEM35B   | NM_001099319_4_+1       |
| Gm14305       | 2.073  | 2.379  | 1.660  | 1.057  | 1.959  | 1.414  | 1.121  | 0.808  | 0.426  | 0.294  | 100043387 | ZNF442    | NM_001099327_2_+1       |
| Zfp831        | 0.867  | -1.015 | -1.402 | -0.635 | 3.339  | 2.883  | 1.564  | 1.399  | 0.714  | -0.564 | 100043757 | ZNF831    | NM_001099328_2_+1       |
| Gm13305       | -1.717 | 1.735  | -2.045 | 2.648  | -4.361 | -1.743 | -4.328 | -1.524 | -3.276 | 0.084  | 100042555 | IL11RA    | NM_001099348_4_-1       |
| Gm13305       | -3.207 | 0.248  | -2.814 | 0.634  | -4.917 | -1.767 | -4.447 | -2.141 | -4.413 | -0.870 | 100042555 | IL11RA    | NM_001099348_dup1_4_-2  |
| Gm14308       | -1.818 | 0.586  | -1.578 | -0.952 | -0.433 | 0.118  | -1.284 | -1.443 | -2.558 | -0.137 | 100043381 | ZNF442    | NM_001099349_2_-1       |
| Gm14308       | -1.533 | -1.848 | -2.477 | -2.972 | -3.380 | -3.625 | -1.960 | -3.969 | -2.558 | -2.468 | 100043381 | ZNF442    | NM_001099349_dup1_2_-2  |
| Gm14308       | -1.335 | 0.124  | -0.268 | 0.030  | -0.736 | -0.728 | 0.094  | 0.047  | -0.539 | -0.180 | 100043381 | ZNF442    | NM_001099349_dup2_2_+1  |
| Gm14308       | -1.533 | -1.848 | -1.889 | -2.942 | -2.930 | -3.045 | -2.944 | -3.837 | -2.558 | -2.446 | 100043381 | ZNF442    | NM_001099349_dup3_2_+2  |
| Gm14308       | -1.655 | -2.119 | -2.583 | -3.450 | -3.559 | -3.674 | -2.699 | -4.051 | -2.558 | -3.072 | 100043381 | ZNF442    | NM_001099349_dup4_2_-3  |
| Gm14308       | -1.655 | -2.039 | -2.580 | -3.337 | -3.506 | -3.058 | -2.749 | -4.050 | -2.558 | -3.072 | 100043381 | ZNF442    | NM_001099349_dup5_2_-4  |
| Rapgef2       | 3.609  | 3.843  | 3.592  | 3.632  | 3.681  | 3.315  | 3.558  | 3.035  | 3.887  | 3.933  | 76089     | RAPGEF2   | NM_001099624_3_-1       |
| Atad2b        | 5.349  | 5.105  | 5.861  | 5.553  | 5.280  | 5.087  | 5.234  | 5.126  | 5.656  | 5.994  | 320817    | ATAD2B    | NM_001099628_12_+1      |
| Sh2d5         | 2.959  | 2.949  | 2.657  | 2.186  | -1.591 | -1.626 | -0.376 | -0.713 | -1.239 | -2.935 | 230863    | SH2D5     | NM_001099631_4_+1       |
| Rnf39         | -4.981 | -4.981 | -1.334 | -2.990 | -1.936 | -2.103 | -1.536 | -3.351 | -2.834 | -3.386 | 386454    | RNF39     | NM_001099632_17_+1      |
| Dnah9         | -4.981 | -3.315 | -4.981 | -4.981 | -4.839 | -4.823 | -4.969 | -4.975 | -4.190 | -4.981 | 237806    | DNAH9     | NM_001099633_11_-1      |
| Myof          | -0.014 | -1.505 | 2.315  | 4.770  | -0.272 | 1.967  | 2.180  | 3.917  | 3.833  | 6.054  | 226101    | MYOF      | NM_001099634_19_-1      |
| Pnmal2        | -0.266 | 0.876  | -4.928 | -4.017 | -4.344 | -4.683 | -3.836 | -4.912 | -4.981 | -4.981 | 434128    | PNMAL2    | NM_001099636_7_+1       |
| Cep170        | 4.343  | 4.482  | 5.464  | 4.899  | 5.425  | 5.008  | 5.697  | 5.248  | 6.020  | 6.127  | 545389    | CEP170    | NM_001099637_1_-1       |
| Npw           | -4.981 | -4.981 | -4.695 | -3.652 | -4.266 | -3.515 | -4.861 | -3.075 | -4.981 | -4.981 | 381073    | NPW       | NM_001099664_17_-1      |
| 1810022K09Rik | 7.102  | 7.023  | 6.347  | 6.176  | 6.263  | 6.356  | 6.736  | 6.318  | 5.412  | 5.411  | 69126     | C8orf59   | NM_001099674_3_-1       |
| Tomm5         | 7.117  | 7.069  | 6.640  | 6.465  | 5.962  | 6.194  | 6.434  | 6.331  | 5.425  | 5.249  | 68512     | NA        | NM_001099675_4_-1       |
| Fbxo39        | -3.563 | -4.981 | -4.080 | -4.345 | -4.260 | -4.961 | -3.640 | -3.991 | -0.361 | -1.896 | 628100    | FBXO39    | NM_001099688_11_+1      |
| Dnajc28       | 1.292  | 0.803  | 0.669  | 0.648  | 1.745  | 1.555  | 1.740  | 1.912  | 1.913  | 2.169  | 246738    | DNAJC28   | NM_001099738_16_-1      |
| Pklr          | -4.981 | -2.668 | -4.792 | -0.442 | -4.249 | -4.737 | -3.331 | 0.448  | -4.981 | -2.279 | 18770     | PKLR      | NM_001099779_3_+1       |

|                |        |        |        |        |        |        |        |        |        |        |           |          |                         |
|----------------|--------|--------|--------|--------|--------|--------|--------|--------|--------|--------|-----------|----------|-------------------------|
| D3Ertd751e     | 1.278  | 1.254  | 1.595  | 1.299  | 2.234  | 1.592  | 1.742  | 1.568  | 1.083  | 1.096  | 73852     | C4orf33  | NM_001099785_3_+1       |
| Trmt61a        | -4.349 | -3.976 | -4.004 | -1.048 | -4.502 | -0.087 | -3.944 | -1.094 | -4.588 | 0.839  | 328162    | TRMT61A  | NM_001099792_12_+1      |
| Trmt61a        | 1.913  | 1.916  | 2.107  | 1.389  | 2.319  | 0.479  | 1.371  | 1.373  | 1.636  | -0.751 | 328162    | TRMT61A  | NM_001099793_12_+1      |
| Smim24         | 5.638  | 5.711  | 2.289  | 2.084  | 2.365  | 2.515  | 2.175  | 2.102  | 1.447  | 1.370  | 72273     | SMIM24   | NM_001099917_10_+1      |
| Srp54b         | 6.334  | 5.896  | 6.386  | 6.117  | 6.392  | 5.828  | 6.197  | 5.597  | 5.696  | 5.310  | 665155    | SRP54    | NM_001100109_12_+1      |
| Srp54b         | -4.901 | -2.068 | -4.942 | -4.968 | -4.870 | -3.985 | -4.790 | -4.124 | -4.865 | -4.967 | 665155    | SRP54    | NM_001100109_dup1_12_+1 |
| Srp54c         | 6.248  | 6.163  | 6.415  | 6.342  | 6.653  | 6.485  | 6.246  | 6.243  | 5.709  | 5.908  | 100101806 | NA       | NM_001100110_12_+1      |
| 1700047117Rik2 | 4.815  | 4.025  | 5.603  | 4.700  | 5.486  | 4.215  | 5.323  | 3.850  | 4.164  | 3.347  | 100101807 | NA       | NM_001100116_12_+1      |
| 1700047117Rik2 | 2.716  | 1.950  | 3.627  | 1.707  | 2.532  | 1.927  | 2.836  | 0.580  | 2.217  | 1.068  | 100101807 | NA       | NM_001100116_dup1_12_+1 |
| Cyp4f37        | -2.499 | -2.204 | -1.321 | -0.744 | 4.343  | 4.116  | 2.888  | 2.803  | 0.591  | 1.925  | 677156    | NA       | NM_001100187_17_+1      |
| Otof           | -2.136 | -4.981 | 0.467  | -0.662 | -2.487 | -2.243 | -0.963 | -0.052 | 2.360  | 2.252  | 83762     | OTOF     | NM_001100395_5_-1       |
| Gm14430        | -1.818 | 0.586  | -1.578 | -0.952 | -0.433 | 0.118  | -1.284 | -1.443 | -2.558 | -0.137 | 627914    | NA       | NM_001100415_2_-1       |
| Gm14430        | -1.533 | -1.848 | -2.477 | -2.972 | -3.380 | -3.625 | -1.960 | -3.969 | -2.558 | -2.468 | 627914    | NA       | NM_001100415_dup1_2_-2  |
| Gm14430        | -1.335 | 0.124  | -0.268 | 0.030  | -0.736 | -0.728 | 0.094  | 0.047  | -0.539 | -0.180 | 627914    | NA       | NM_001100415_dup2_2_+1  |
| Gm14430        | -1.533 | -1.848 | -1.889 | -2.942 | -2.930 | -3.045 | -2.944 | -3.837 | -2.558 | -2.446 | 627914    | NA       | NM_001100415_dup3_2_+2  |
| Gm14430        | -1.655 | -2.119 | -2.583 | -3.450 | -3.559 | -3.674 | -2.699 | -4.051 | -2.558 | -3.072 | 627914    | NA       | NM_001100415_dup4_2_-3  |
| Gm14430        | -1.655 | -2.039 | -2.580 | -3.337 | -3.506 | -3.058 | -2.749 | -4.050 | -2.558 | -3.072 | 627914    | NA       | NM_001100415_dup5_2_-4  |
| TMUSG00000016  | 0.844  | 1.613  | 0.234  | 1.294  | 0.569  | 2.671  | -0.791 | 0.325  | -3.687 | 1.151  | 668030    | NA       | NM_001100416_2_-1       |
| TMUSG00000016  | 1.408  | 1.291  | -0.093 | -1.298 | -2.461 | -2.716 | 0.688  | -0.703 | -3.720 | -2.078 | 668030    | NA       | NM_001100416_dup1_2_-2  |
| TMUSG00000016  | 1.702  | 3.290  | 0.359  | 2.037  | 1.123  | 1.659  | 1.363  | 1.713  | -1.647 | 1.257  | 668030    | NA       | NM_001100416_dup2_2_+1  |
| TMUSG00000016  | 1.615  | 1.496  | -0.647 | -1.150 | -1.705 | -2.383 | -2.326 | -3.042 | -3.687 | -1.838 | 668030    | NA       | NM_001100416_dup3_2_+2  |
| TMUSG00000016  | 1.279  | 0.361  | -0.612 | -1.629 | -2.416 | -2.482 | -2.852 | -3.565 | -3.687 | -3.113 | 668030    | NA       | NM_001100416_dup4_2_-3  |
| TMUSG00000016  | 1.279  | 0.823  | -0.554 | -1.488 | -2.410 | -2.487 | -3.102 | -3.572 | -3.687 | -3.113 | 668030    | NA       | NM_001100416_dup5_2_-4  |
| Taf4b          | 1.898  | 1.728  | 3.283  | 2.864  | 2.801  | 3.125  | 2.747  | 3.055  | 2.214  | 2.845  | 72504     | TAF4B    | NM_001100449_18_+1      |
| Msl2           | 4.602  | 4.219  | 4.889  | 4.462  | 4.772  | 4.506  | 4.780  | 4.862  | 5.258  | 5.511  | 77853     | MSL2     | NM_001100451_9_+1       |
| Gltscl1        | 3.925  | 3.381  | 3.312  | 3.361  | 4.399  | 4.461  | 3.910  | 3.942  | 4.990  | 4.936  | 210982    | GLTSCR1L | NM_001100452_17_-1      |
| Wfikkn1        | 0.949  | 0.465  | 0.248  | -0.049 | -0.211 | 0.390  | -0.617 | -0.794 | 0.793  | -0.180 | 215001    | WFIKKN1  | NM_001100454_17_-1      |
| Fam169a        | -3.116 | -2.871 | -3.384 | -3.779 | -4.058 | -3.446 | -3.147 | -4.376 | -2.903 | -3.276 | 320557    | FAM169A  | NM_001100458_13_+1      |
| Zbtb42         | 0.186  | 0.392  | 1.997  | 2.039  | 1.049  | 0.439  | 2.092  | 1.432  | 3.359  | 3.673  | 382639    | ZBTB42   | NM_001100460_12_+1      |
| Tmem221        | 7.069  | 7.419  | 2.609  | 2.473  | 1.467  | 1.773  | 1.660  | 1.724  | -0.023 | 1.432  | 434325    | TMEM221  | NM_001100462_8_-1       |
| Rc3h2          | 3.243  | 3.819  | 4.410  | 4.108  | 4.527  | 4.474  | 3.638  | 4.126  | 4.341  | 5.066  | 319817    | RC3H2    | NM_001100591_2_-1       |
| Gm2002         | -1.367 | -1.541 | -4.991 | -3.668 | -4.953 | -4.953 | -4.981 | -4.980 | -4.981 | -4.981 | 100038993 | IL11RA   | NM_001100596_4_-1       |
| Gm2002         | -1.930 | -3.879 | -4.976 | -4.218 | -4.978 | -4.978 | -4.981 | -4.980 | -4.981 | -4.981 | 100038993 | IL11RA   | NM_001100596_dup1_4_-2  |
| Adat3          | 2.933  | 2.859  | 2.288  | 2.370  | 1.723  | 1.740  | 1.684  | 1.834  | 2.595  | 2.154  | 100113398 | ADAT3    | NM_001100606_10_+1      |
| Psmg4          | 5.654  | 5.421  | 5.064  | 5.131  | 4.230  | 4.365  | 4.842  | 4.616  | 3.624  | 3.609  | 69666     | PSMG4    | NM_001101430_13_+1      |
| Zcchc24        | 5.537  | 5.459  | 3.126  | 2.510  | 3.169  | 3.151  | 3.724  | 4.624  | 6.916  | 7.114  | 71918     | ZCCHC24  | NM_001101433_14_-1      |
| Cyp4f17        | -0.417 | 1.014  | -1.226 | 0.291  | -0.363 | 0.709  | -0.769 | 0.130  | -0.170 | -0.587 | 208285    | NA       | NM_001101445_17_+1      |
| Akap5          | 1.121  | 1.550  | 0.484  | 0.108  | 1.691  | 1.685  | -0.135 | -0.227 | -0.953 | -1.843 | 238276    | AKAP5    | NM_001101471_12_+1      |
| F830016B08Rik  | -0.921 | -1.014 | -1.838 | -1.537 | -3.764 | -1.838 | -4.084 | -2.902 | -2.216 | -2.412 | 240328    | NA       | NM_001101475_18_+1      |
| D3ErtD254e     | 2.176  | 2.144  | 2.311  | 2.388  | 2.308  | 2.413  | 2.135  | 2.287  | 2.337  | 3.043  | 241944    | ZNF267   | NM_001101478_3_+1       |
| Mrap2          | -4.981 | -4.981 | -4.251 | -4.222 | -3.391 | -4.695 | -4.159 | -3.625 | -4.981 | -4.981 | 244958    | MRAP2    | NM_001101482_9_+1       |
| Slc35g2        | -2.647 | -0.505 | -2.229 | -2.111 | -3.718 | -2.779 | -2.112 | -2.952 | -1.639 | -2.172 | 245020    | SLC35G2  | NM_001101483_9_-1       |
| Zfp703         | 0.871  | -0.601 | 1.550  | 1.441  | 1.740  | 0.934  | 2.395  | 2.050  | 3.345  | 3.445  | 353310    | ZNF703   | NM_001101502_8_+1       |
| Tmem240        | -3.843 | -2.587 | -3.743 | -3.720 | -3.666 | -4.223 | -3.219 | -3.939 | -2.519 | -2.426 | 381582    | TMEM240  | NM_001101506_4_+1       |
| Clec2l         | 2.558  | 2.394  | 0.097  | -0.298 | -4.811 | -2.766 | -3.139 | -1.121 | -4.981 | -4.981 | 665180    | CLEC2L   | NM_001101507_6_+1       |
| Gpr25          | -0.924 | 0.324  | -4.971 | -2.328 | 1.225  | -0.005 | -1.858 | -2.619 | -4.981 | -4.981 | 383563    | GPR25    | NM_001101516_1_-1       |
| Ccdc8          | -4.981 | -4.981 | -3.398 | -4.878 | -1.705 | -2.909 | -3.136 | -3.627 | -4.981 | -4.981 | 434130    | CCDC8    | NM_001101535_7_+1       |
| Cldn20         | -4.981 | -4.981 | -4.604 | -4.022 | -4.370 | -2.949 | -3.121 | -2.759 | -0.729 | -4.981 | 621628    | CLDN20   | NM_001101560_17_+1      |
| Rpl32l         | -1.656 | -0.838 | -1.457 | -2.122 | -1.918 | -3.030 | -1.486 | -2.955 | -1.481 | -2.772 | 621697    | RPL32    | NM_001101561_10_+1      |
| Cyp4f40        | -4.981 | -4.981 | -4.981 | -4.981 | -2.175 | -1.606 | -4.669 | -4.314 | -4.981 | -4.981 | 631304    | CYP4F11  | NM_001101588_17_+1      |
| Isoc2a         | 0.353  | 1.310  | 1.518  | 0.996  | 0.244  | 0.035  | 0.263  | 0.513  | 0.203  | -0.220 | 664994    | ISOC2    | NM_001101598_7_+1       |
| Gm7616         | -4.981 | -4.981 | -4.738 | -4.620 | -4.972 | -4.806 | -4.851 | -4.922 | -4.981 | -4.981 | 665389    | NA       | NM_001101600_9_+1       |
| Ifit1bl1       | -2.713 | -2.397 | 0.558  | -0.664 | 3.002  | 1.462  | 2.358  | 1.212  | 3.542  | 2.677  | 667373    | IFIT1    | NM_001101605_19_-1      |
| Gm8817         | -2.362 | -3.315 | -1.726 | -2.063 | 1.017  | 0.381  | 0.292  | -1.891 | -2.425 | -3.853 | 667794    | NA       | NM_001101606_X_-1       |
| Klra8          | -4.924 | -4.643 | -4.946 | -4.871 | -4.938 | -4.975 | -4.849 | -4.873 | -4.610 | -4.803 | 16639     | NA       | NM_001101620_6_-1       |
| Cd300ld4       | -4.981 | -4.981 | -4.785 | -4.979 | -4.948 | -4.974 | -4.956 | -4.979 | -4.955 | -4.934 | 100043123 | CD300LD  | NM_001101656_11_-1      |
| Cd300ld4       | -4.981 | -1.249 | -4.904 | -3.644 | -4.924 | -4.462 | -0.958 | -0.196 | -2.964 | -1.291 | 100043123 | CD300LD  | NM_001101656_dup1_11_-1 |
| Cd300ld5       | -4.981 | -1.249 | -4.904 | -3.644 | -4.924 | -4.462 | -0.958 | -0.196 | -2.964 | -1.291 | 100043125 | CD300LD  | NM_001101657_11_-1      |
| Cd300ld5       | -4.981 | -4.981 | -4.785 | -4.979 | -4.948 | -4.974 | -4.956 | -4.979 | -4.955 | -4.934 | 100043125 | CD300LD  | NM_001101657_dup1_11_-1 |
| Gm14434        | -1.818 | 0.586  | -1.578 | -0.952 | -0.433 | 0.118  | -1.284 | -1.443 | -2.558 | -0.137 | 668039    | ZNF442   | NM_001101804_2_-1       |
| Gm14434        | -1.533 | -1.848 | -2.477 | -2.972 | -3.380 | -3.625 | -1.960 | -3.969 | -2.558 | -2.468 | 668039    | ZNF442   | NM_001101804_dup1_2_-2  |
| Gm14434        | -1.335 | 0.124  | -0.268 | 0.030  | -0.736 | -0.728 | 0.094  | 0.047  | -0.539 | -0.180 | 668039    | ZNF442   | NM_001101804_dup2_2_+1  |
| Gm14434        | -1.533 | -1.848 | -1.889 | -2.942 | -2.930 | -3.045 | -2.944 | -3.837 | -2.558 | -2.446 | 668039    | ZNF442   | NM_001101804_dup3_2_+2  |
| Gm14434        | -1.655 | -2.119 | -2.583 | -3.450 | -3.559 | -3.674 | -2.699 | -4.051 | -2.558 | -3.072 | 668039    | ZNF442   | NM_001101804_dup4_2_-3  |
| Gm14434        | -1.655 | -2.039 | -2.580 | -3.337 | -3.506 | -3.058 | -2.749 | -4.050 | -2.558 | -3.072 | 668039    | ZNF442   | NM_001101804_dup5_2_-4  |
| Dab2           | -3.621 | -4.981 | -1.903 | -3.774 | -3.571 | -4.067 | -1.843 | -2.432 | -2.800 | -3.983 | 13132     | DAB2     | NM_001102400_15_+1      |
| Acp5           | 3.294  | 3.832  | 4.544  | 5.665  | 6.210  | 7.013  | 5.912  | 6.578  | 3.840  | 5.665  | 11433     | NA       | NM_001102404_9_-1       |
| Acp5           | -4.054 | -3.398 | -4.128 | 1.484  | -0.530 | 2.932  | -1.723 | 1.796  | -4.263 | 1.039  | 11433     | NA       | NM_001102405_9_-1       |
| Rbm8a          | 6.511  | 6.473  | 5.916  | 6.013  | 5.839  | 5.882  | 6.226  | 6.169  | 5.298  | 4.993  | 60365     | RBM8A    | NM_001102407_3_+1       |
| Slc2a9         | -4.486 | -1.058 | -2.268 | -3.612 | -0.547 | -2.041 | -1.995 | -2.111 | 1.818  | 1.423  | 117591    | SLC2A9   | NM_001102414_5_-1       |
| Slc2a9         | -3.563 | -2.387 | -3.130 | -3.183 | -2.757 | -2.761 | -1.080 | -2.196 | -2.725 | -4.923 | 117591    | SLC2A9   | NM_001102415_5_-1       |
| Stx16          | 3.294  | 3.114  | 4.415  | 3.915  | 4.221  | 4.477  | 3.896  | 3.988  | 3.902  | 3.951  | 228960    | STX16    | NM_001102423_2_+1       |
| Stx16          | 2.656  | 2.293  | 2.542  | 3.429  | 2.746  | 3.449  | 2.703  | 2.800  | 2.566  | 3.113  | 228960    | STX16    | NM_001102424_2_+1       |
| Stx16          | 3.690  | 1.680  | 3.981  | 2.104  | 2.361  | 2.931  | 4.090  | 2.046  | 2.713  | 3.762  | 228960    | STX16    | NM_001102425_2_+1       |

|          |        |        |        |        |        |        |        |        |        |        |           |         |                        |
|----------|--------|--------|--------|--------|--------|--------|--------|--------|--------|--------|-----------|---------|------------------------|
| Arfgef1  | 5.435  | 5.277  | 6.208  | 5.876  | 6.276  | 6.129  | 6.035  | 5.876  | 5.967  | 6.271  | 211673    | ARFGEF1 | NM_001102430_1_-1      |
| Acbd5    | 2.001  | 2.536  | 2.344  | 2.205  | 1.997  | 1.337  | 2.193  | -0.356 | 0.903  | 3.442  | 74159     | ACBD5   | NM_001102436_2_+1      |
| Acbd5    | 4.482  | 4.625  | 4.136  | 3.916  | 3.640  | 4.126  | 3.642  | 4.115  | 5.081  | 5.057  | 74159     | ACBD5   | NM_001102437_2_+1      |
| Acbd5    | 3.537  | 4.122  | 4.025  | 3.743  | 3.032  | 3.646  | 3.408  | 4.131  | 3.877  | 4.303  | 74159     | ACBD5   | NM_001102438_2_+1      |
| Add1     | -0.013 | -1.017 | -1.357 | -2.066 | -1.560 | -2.210 | -1.467 | -1.851 | -0.110 | 0.112  | 11518     | ADD1    | NM_001102444_5_+1      |
| Alas2    | -4.615 | -3.112 | -1.339 | 1.380  | -0.589 | 1.929  | -0.845 | 1.290  | -1.508 | 1.014  | 11656     | ALAS2   | NM_001102446_X_+1      |
| Aplp2    | 4.312  | 4.280  | 5.901  | 6.071  | 5.862  | 5.973  | 6.397  | 6.737  | 8.028  | 8.214  | 11804     | APLP2   | NM_001102455_9_-1      |
| Aplp2    | 1.654  | -2.198 | 2.223  | 1.299  | 2.077  | 1.172  | 3.092  | 2.481  | 3.797  | 4.084  | 11804     | APLP2   | NM_001102456_9_-1      |
| Azin1    | 3.734  | 3.965  | 3.783  | 3.902  | 3.463  | 3.708  | 3.673  | 3.569  | 3.938  | 3.796  | 54375     | AZIN1   | NM_001102458_15_-1     |
| Calml4   | -1.681 | -4.981 | -4.978 | -4.750 | -4.991 | -4.991 | -4.251 | -4.620 | -0.865 | -0.390 | 75600     | CALML4  | NM_001102468_9_+1      |
| Cnnm2    | 1.957  | 1.227  | 0.791  | 1.026  | 0.892  | 1.143  | 1.220  | 1.332  | 1.102  | 1.589  | 94219     | CNNM2   | NM_001102471_19_+1     |
| Prrt2    | -3.349 | -3.408 | -2.576 | -3.460 | -0.892 | -0.622 | -1.020 | -0.801 | 0.086  | 0.222  | 69017     | PRRT2   | NM_001102563_7_-1      |
| Alkbh1   | 4.988  | 4.841  | 5.224  | 4.971  | 4.786  | 4.890  | 4.446  | 4.707  | 4.092  | 4.088  | 211064    | ALKBH1  | NM_001102565_12_-1     |
| Smyd4    | 2.699  | 3.116  | 2.334  | 2.207  | 3.197  | 3.082  | 2.375  | 2.424  | 0.892  | 1.532  | 319822    | SMYD4   | NM_001102611_11_+1     |
| Phldb3   | 0.264  | -0.146 | -0.422 | 0.476  | -0.058 | 0.882  | 0.303  | 0.323  | -0.029 | 0.465  | 232970    | PHLDB3  | NM_001102613_7_+1      |
| Kif19a   | -4.981 | -4.981 | 0.886  | 1.624  | -3.203 | -2.224 | -0.275 | 0.022  | -0.890 | 0.666  | 286942    | KIF19   | NM_001102615_11_+1     |
| Nt5c3b   | 5.157  | 5.291  | 4.364  | 4.635  | 4.011  | 4.093  | 3.595  | 4.050  | 1.643  | 2.302  | 68106     | NT5C3B  | NM_001102650_11_-1     |
| Kbtbd8   | 0.513  | -0.307 | -0.225 | -1.117 | 0.453  | -1.517 | 0.812  | -0.199 | -0.065 | 1.184  | 243574    | KBTBD8  | NM_001102670_6_+1      |
| Zfp980   | -4.981 | -1.807 | -4.913 | -2.089 | -4.977 | -3.397 | -4.676 | -3.020 | -4.981 | -2.311 | 100041379 | ZNF616  | NM_001103158_4_+1      |
| Scap     | 5.554  | 5.193  | 4.186  | 4.084  | 4.060  | 3.537  | 4.003  | 3.535  | 3.671  | 3.492  | 235623    | SCAP    | NM_001103162_9_+1      |
| Pcbp2    | 6.038  | 5.523  | 6.076  | 5.746  | 5.825  | 5.338  | 5.836  | 5.111  | 4.948  | 4.428  | 18521     | PCBP2   | NM_001103165_15_+1     |
| Pcbp2    | 5.357  | 4.634  | 5.417  | 4.900  | 4.836  | 4.404  | 5.085  | 4.129  | 3.961  | 3.844  | 18521     | PCBP2   | NM_001103166_15_+1     |
| Zglp1    | -4.981 | -4.981 | -4.962 | -4.592 | -4.963 | -4.263 | -3.975 | -4.762 | -3.491 | -4.981 | 100009600 | ZGLP1   | NM_001103168_9_-1      |
| Myo15    | -3.026 | -4.981 | -4.888 | -3.979 | -3.683 | -4.863 | -3.769 | -4.923 | -2.108 | -4.486 | 17910     | MYO15A  | NM_001103171_11_+1     |
| Abli1    | -0.877 | -3.382 | -4.642 | -0.432 | -4.836 | -2.347 | -2.608 | -2.950 | -4.465 | -4.873 | 226251    | ABLIM1  | NM_001103177_19_-1     |
| Abli1    | 5.536  | 1.807  | -0.393 | 0.444  | 0.160  | 2.269  | 1.728  | 3.861  | 0.026  | 1.302  | 226251    | ABLIM1  | NM_001103178_19_-1     |
| Brwd1    | 3.972  | 3.699  | 3.992  | 3.582  | 4.246  | 3.968  | 4.112  | 3.783  | 3.936  | 3.790  | 93871     | BRWD1   | NM_001103179_16_-1     |
| Tulp4    | 1.388  | 2.481  | -1.929 | -1.230 | 0.109  | -0.140 | 0.761  | 0.420  | -0.510 | -0.247 | 68842     | TULP4   | NM_001103181_17_+1     |
| Lin9     | 2.504  | 2.640  | 2.652  | 2.256  | 2.775  | 2.057  | 2.863  | 2.331  | 2.490  | 2.472  | 72568     | LIN9    | NM_001103182_1_+1      |
| Rai2     | 4.446  | 5.004  | -3.532 | -2.846 | -4.915 | -3.513 | -4.902 | -4.450 | -3.109 | -3.039 | 24004     | RAI2    | NM_001103367_X_+1      |
| Gpr35    | 6.262  | 6.264  | 6.311  | 6.319  | 7.163  | 7.119  | 6.897  | 6.916  | 7.739  | 7.712  | 64095     | GPR35   | NM_001104529_1_+1      |
| Med7     | 4.744  | 4.884  | 5.472  | 4.964  | 3.535  | 3.601  | 3.887  | 3.010  | 2.867  | 3.004  | 66213     | MED7    | NM_001104530_11_+1     |
| Vmn2r90  | -4.981 | -4.981 | -0.289 | -2.517 | -3.945 | -4.524 | -3.082 | -3.009 | -4.981 | -4.981 | 626942    | NA      | NM_001104539_17_+1     |
| Vmn2r96  | -4.981 | -3.408 | -4.148 | -4.515 | -4.051 | -2.998 | -3.649 | -2.715 | -4.981 | -4.981 | 433070    | NA      | NM_001104547_17_+1     |
| Med7     | 3.012  | 2.395  | 2.816  | 3.084  | 2.697  | 2.478  | 2.568  | 1.910  | 2.174  | 2.125  | 66213     | MED7    | NM_001104556_11_+1     |
| Med7     | 1.057  | 0.278  | 7.415  | 3.475  | 1.051  | -0.361 | 1.076  | -0.091 | 0.853  | -0.254 | 66213     | MED7    | NM_001104557_11_+1     |
| Rdx      | 5.236  | 5.552  | 5.689  | 5.513  | 5.467  | 5.401  | 5.414  | 5.542  | 5.164  | 5.898  | 19684     | RDX     | NM_001104616_9_+1      |
| Rdx      | 4.204  | 4.491  | 4.126  | 4.116  | 4.146  | 4.163  | 3.757  | 3.151  | 1.541  | 1.800  | 19684     | RDX     | NM_001104617_9_+1      |
| Vmn2r55  | -4.981 | -3.267 | -4.925 | -4.396 | -4.130 | -4.957 | -4.149 | -4.947 | -4.981 | -4.981 | 100042499 | NA      | NM_001104645_7_-1      |
| AW209491 | 0.253  | 2.068  | 0.264  | 1.737  | 1.076  | 1.679  | 1.213  | 1.324  | 1.439  | 1.721  | 105351    | C7orf25 | NM_001104646_13_+1     |
| Vmn2r46  | -4.126 | -4.981 | -4.972 | -4.972 | -4.980 | -4.787 | -4.549 | -4.947 | -4.981 | -4.473 | 100042894 | NA      | NM_001105076_7_-1      |
| Vmn2r46  | -4.126 | -4.981 | -4.972 | -4.972 | -4.980 | -4.787 | -4.549 | -4.947 | -4.981 | -4.473 | 100042894 | NA      | NM_001105076_dup1_7_-2 |
| Tfe3     | 1.134  | 0.684  | 2.057  | 1.966  | 1.506  | 0.899  | 1.685  | 1.634  | 2.272  | 3.619  | 209446    | TFE3    | NM_001105196_X_+1      |
| Tfe3     | 3.320  | 2.527  | 3.618  | 4.229  | 3.624  | 3.481  | 4.162  | 4.513  | 5.475  | 5.677  | 209446    | TFE3    | NM_001105197_X_+1      |
| Cyp26c1  | -4.981 | -4.981 | -4.972 | -4.972 | -4.085 | -4.977 | -4.962 | -4.972 | -4.981 | -4.981 | 546726    | CYP26C1 | NM_001105201_19_+1     |
| Zfp938   | 3.426  | 3.671  | 2.165  | 2.766  | 2.544  | 2.691  | 2.765  | 2.387  | 0.880  | 2.151  | 237411    | NA      | NM_001105557_10_-1     |
| Gm11545  | -4.981 | -4.981 | 4.997  | 5.563  | 2.882  | 3.472  | 2.342  | 2.037  | -1.900 | -2.391 | 217122    | NA      | NM_001105561_11_-1     |
| Dtymk    | 5.625  | 5.395  | 4.461  | 4.578  | 5.086  | 5.135  | 4.697  | 4.623  | 3.309  | 3.015  | 21915     | DTYMK   | NM_001105667_1_-1      |
| Kif21a   | -4.981 | -4.428 | -4.971 | -4.913 | -4.762 | -4.912 | -4.965 | -4.956 | -4.981 | -4.873 | 16564     | KIF21A  | NM_001109040_15_-1     |
| Kif21a   | -4.981 | -4.070 | -4.975 | -4.804 | -4.765 | -4.880 | -4.949 | -4.944 | -4.981 | -4.755 | 16564     | KIF21A  | NM_001109041_15_-1     |
| Kif21a   | -4.981 | -1.761 | -4.984 | -2.695 | -3.644 | -2.594 | -4.847 | -4.917 | -4.981 | -3.259 | 16564     | KIF21A  | NM_001109042_15_-1     |
| Cdk12    | 2.264  | 2.198  | 2.743  | 2.160  | 2.930  | 2.005  | 2.759  | 2.143  | 2.509  | 2.917  | 69131     | CDK12   | NM_001109626_11_+1     |
| Cdk12    | 3.218  | 3.134  | 3.844  | 3.514  | 3.695  | 3.585  | 3.351  | 3.199  | 3.359  | 3.250  | 69131     | CDK12   | NM_001109628_11_+1     |
| Gas7     | 6.180  | 6.437  | -4.421 | -0.515 | -4.784 | -0.991 | -0.342 | 2.637  | 6.142  | 5.993  | 14457     | GAS7    | NM_001109657_11_+1     |
| Bach2    | 3.154  | 3.373  | 2.577  | 1.591  | 2.001  | 1.879  | 3.365  | 3.353  | 2.319  | 1.302  | 12014     | BACH2   | NM_001109661_4_+1      |
| Kazn     | -2.948 | -1.991 | 2.087  | 2.608  | 0.129  | -1.023 | -1.028 | 0.418  | -3.750 | -1.359 | 71529     | KAZN    | NM_001109684_4_-1      |
| Kazn     | -3.169 | -4.773 | -2.413 | 0.444  | 0.596  | 1.438  | -0.122 | -0.194 | -4.950 | -3.838 | 71529     | KAZN    | NM_001109685_4_-1      |
| Ehmt1    | 4.038  | 4.378  | 3.101  | 2.759  | 3.372  | 4.214  | 3.178  | 2.374  | 0.993  | 0.711  | 77683     | EHMT1   | NM_001109686_2_-1      |
| Ehmt1    | 2.481  | 2.942  | 2.559  | 1.828  | 2.473  | 1.720  | 3.026  | 2.127  | 1.530  | 1.932  | 77683     | EHMT1   | NM_001109687_2_-1      |
| C2cd5    | 0.886  | -0.458 | 0.324  | -2.584 | 0.217  | 0.960  | -0.521 | -1.576 | 0.917  | 0.099  | 74741     | C2CD5   | NM_001109688_6_-1      |
| Phf21a   | 2.692  | 3.085  | 2.321  | 2.401  | 4.046  | 3.961  | 3.716  | 3.438  | 3.629  | 3.413  | 192285    | PHF21A  | NM_001109690_2_+1      |
| Phf21a   | 1.933  | 2.122  | 1.579  | -0.688 | 2.328  | 2.354  | 1.905  | 1.570  | 2.864  | 2.725  | 192285    | PHF21A  | NM_001109691_2_+1      |
| Cnbp     | 6.711  | 6.532  | 6.141  | 5.781  | 6.122  | 5.642  | 6.018  | 5.465  | 5.382  | 4.594  | 12785     | CNBP    | NM_001109745_6_-1      |
| Cnbp     | 8.993  | 9.021  | 8.503  | 8.475  | 8.507  | 8.481  | 8.367  | 8.259  | 7.400  | 7.267  | 12785     | CNBP    | NM_001109746_6_-1      |
| Cenpw    | 2.209  | 1.815  | 3.377  | 3.291  | 3.352  | 3.014  | 3.323  | 2.778  | 0.688  | 0.100  | 66311     | CENPW   | NM_001109747_10_-1     |
| Tomm40   | 0.450  | 0.834  | 0.743  | 1.248  | -0.072 | 0.102  | 0.475  | -0.015 | 0.266  | 0.468  | 53333     | TOMM40  | NM_001109748_7_-1      |
| Dgcr2    | 3.414  | 4.086  | 3.878  | 3.502  | 4.156  | 3.518  | 3.885  | 3.962  | 4.547  | 4.347  | 13356     | DGCR2   | NM_001109750_16_-1     |
| Dlg4     | -0.939 | -1.747 | -2.236 | -2.677 | -1.811 | -3.431 | -1.975 | -2.265 | -1.963 | -1.464 | 13385     | DLG4    | NM_001109752_11_+1     |
| Sv2b     | -1.918 | 1.378  | -4.974 | -4.974 | -4.862 | -4.334 | -4.446 | -0.257 | -4.981 | -3.178 | 64176     | SV2B    | NM_001109753_7_-1      |
| Adcy7    | 3.456  | 3.654  | 2.977  | 3.110  | 3.975  | 4.347  | 5.045  | 4.978  | 5.640  | 6.595  | 11513     | ADCY7   | NM_001109756_8_+1      |
| Atp7a    | 2.855  | 3.568  | 3.909  | 3.307  | 2.459  | 3.507  | 3.758  | 2.591  | 4.802  | 5.629  | 11977     | ATP7A   | NM_001109757_X_+1      |
| Fam71a   | -3.090 | -4.981 | 1.008  | 1.531  | 1.835  | 2.019  | 2.140  | 1.378  | 0.242  | 0.928  | 619288    | FAM71A  | NM_001109759_1_-1      |
| Capn3    | 1.430  | -4.981 | -1.473 | -1.522 | -1.587 | -3.387 | -1.935 | -2.415 | -2.001 | -4.966 | 12335     | CAPN3   | NM_001109761_2_+1      |
| Ttyh1    | -1.812 | -4.810 | -4.987 | -4.274 | -4.186 | -4.288 | -4.972 | -3.869 | -2.598 | -4.981 | 57776     | TTYH1   | NM_001109765_7_+1      |

|         |        |        |        |        |        |        |        |        |        |        |           |         |                    |
|---------|--------|--------|--------|--------|--------|--------|--------|--------|--------|--------|-----------|---------|--------------------|
| Cbfa2t3 | 2.193  | 1.159  | 2.737  | 1.944  | 3.364  | 2.937  | 3.351  | 1.916  | 2.990  | 3.878  | 12398     | CBFA2T3 | NM_001109873_8_-1  |
| Trpc2   | -2.501 | -0.477 | -2.089 | -3.649 | -0.977 | -3.188 | -2.132 | -3.650 | -2.363 | -2.277 | 22064     | NA      | NM_001109897_7_+1  |
| Rnft2   | -1.163 | -0.778 | -1.297 | -1.360 | -0.777 | -0.359 | -2.255 | -3.946 | -2.420 | -4.981 | 269695    | RNFT2   | NM_001109902_5_-1  |
| Stau1   | 4.250  | 4.239  | 4.892  | 4.591  | 4.818  | 4.406  | 5.088  | 4.827  | 5.534  | 5.050  | 20853     | STAU1   | NM_001109905_2_-1  |
| Stau1   | 4.226  | 4.325  | 4.311  | 4.556  | 3.953  | 4.220  | 3.852  | 4.312  | 4.548  | 5.136  | 20853     | STAU1   | NM_001109906_2_-1  |
| Srrt    | 2.608  | 3.131  | 4.016  | 4.188  | 3.813  | 3.661  | 3.016  | 3.805  | 2.628  | 2.828  | 83701     | SRRT    | NM_001109909_5_-1  |
| Srrt    | 2.368  | 2.523  | 2.800  | 3.052  | 3.163  | 3.319  | 2.812  | 2.446  | 1.895  | 2.948  | 83701     | SRRT    | NM_001109910_5_-1  |
| Hnrnpm  | 6.710  | 6.716  | 7.200  | 7.306  | 7.344  | 7.100  | 7.120  | 7.132  | 7.171  | 7.252  | 76936     | HNRNPM  | NM_001109913_17_-1 |
| Apold1  | -1.171 | -4.981 | -3.009 | -4.610 | -2.279 | -2.747 | -1.353 | -2.329 | -4.981 | -1.786 | 381823    | APOLD1  | NM_001109914_6_+1  |
| Sec61g  | 4.992  | 4.500  | 4.071  | 3.633  | 2.328  | 2.292  | 3.026  | 3.205  | 2.807  | 2.497  | 20335     | SEC61G  | NM_001109971_11_-1 |
| Sec61g  | 3.564  | 3.050  | 3.095  | 2.563  | 2.034  | 1.786  | 2.516  | 2.170  | 1.971  | 1.605  | 20335     | SEC61G  | NM_001109972_11_-1 |
| Synpo   | -3.566 | -2.883 | -1.820 | -3.052 | -2.843 | -4.456 | -3.274 | -4.086 | -4.981 | -2.969 | 104027    | SYNPO   | NM_001109975_18_-1 |
| Nos1ap  | 1.809  | 0.717  | -0.054 | -0.925 | 0.260  | -0.923 | 1.714  | 0.045  | 2.323  | 0.937  | 70729     | NA      | NM_001109985_1_-1  |
| Nrep    | -2.805 | -4.981 | -4.262 | -4.626 | -4.694 | -3.370 | -3.261 | -1.087 | -4.433 | -4.748 | 27528     | NREP    | NM_001109988_18_-1 |
| Nrep    | -2.754 | -4.981 | -1.204 | -2.205 | -3.022 | -4.358 | -3.621 | -1.785 | -3.414 | -3.516 | 27528     | NREP    | NM_001109989_18_-1 |
| Col18a1 | -4.981 | -4.981 | -4.898 | -4.956 | -4.971 | -4.977 | -4.960 | -4.978 | -4.981 | -4.981 | 12822     | COL18A1 | NM_001109991_10_-1 |
| Ptpn11  | 4.526  | 4.495  | 4.997  | 5.349  | 4.507  | 5.269  | 4.630  | 5.073  | 4.055  | 4.481  | 19247     | PTPN11  | NM_001109992_5_-1  |
| Tmem141 | 1.611  | 0.824  | 3.487  | 3.847  | 4.359  | 3.586  | 3.796  | 3.699  | 3.193  | 3.097  | 51875     | TMEM141 | NM_001109993_2_-1  |
| Eftud2  | 2.084  | 1.202  | 1.399  | 2.638  | 2.240  | 2.451  | 0.784  | 2.124  | 3.271  | 2.964  | 20624     | EFTUD2  | NM_001109995_11_-1 |
| Apoc1   | 2.045  | -2.349 | -0.147 | -1.684 | 1.348  | -3.028 | 2.031  | 2.194  | 3.703  | 3.572  | 11812     | NA      | NM_001110009_7_-1  |
| Tmtc3   | 1.977  | 1.932  | 4.107  | 5.235  | 1.605  | 2.985  | 1.676  | 3.293  | 3.193  | 4.034  | 237500    | TMTC3   | NM_001110013_10_-1 |
| Wdr36   | 4.192  | 4.109  | 4.600  | 4.645  | 4.401  | 4.197  | 4.144  | 4.470  | 4.489  | 4.576  | 225348    | WDR36   | NM_001110015_18_+1 |
| Wdr36   | 0.458  | 1.154  | -0.703 | 1.435  | -0.210 | 0.996  | -0.980 | 0.722  | 2.057  | 0.716  | 225348    | WDR36   | NM_001110016_18_+1 |
| Dzip3   | 1.824  | 2.491  | 2.597  | 2.244  | 2.213  | 2.027  | 0.505  | 1.037  | -0.216 | 1.148  | 224170    | DZIP3   | NM_001110017_16_-1 |
| Banp    | 1.870  | 2.863  | 2.625  | 2.642  | 3.737  | 3.406  | 2.732  | 2.181  | 1.462  | 1.939  | 53325     | BANP    | NM_001110100_8_+1  |
| Lsm2    | 4.717  | 4.630  | 4.725  | 4.616  | 4.808  | 4.559  | 4.693  | 4.474  | 3.602  | 3.463  | 27756     | LSM2    | NM_001110101_17_+1 |
| Ppih    | 2.260  | 2.032  | 1.288  | 1.252  | 1.512  | 1.589  | 1.595  | 1.123  | 0.831  | -0.104 | 66101     | PIIH    | NM_001110129_4_-1  |
| Ppih    | -0.753 | -1.260 | -2.226 | -2.876 | -3.226 | -3.586 | -3.272 | -1.870 | -3.466 | -4.981 | 66101     | PIIH    | NM_001110130_4_-1  |
| Atp2a2  | 2.933  | 3.306  | 5.803  | 5.863  | 3.646  | 3.572  | 2.638  | 4.734  | 6.705  | 7.182  | 11938     | ATP2A2  | NM_001110140_5_-1  |
| Cul4b   | 0.874  | 0.762  | 0.980  | 0.939  | 0.548  | 0.102  | 0.676  | 0.372  | 1.485  | 1.661  | 72584     | CUL4B   | NM_001110142_X_-1  |
| Ssb     | 7.716  | 7.709  | 7.494  | 7.402  | 7.611  | 7.586  | 7.666  | 7.387  | 6.569  | 6.833  | 20823     | SSB     | NM_001110145_2_+1  |
| Prg4    | -0.391 | -0.781 | -0.093 | -0.249 | -0.645 | -0.648 | -0.509 | -1.215 | -0.108 | -0.045 | 96875     | NA      | NM_001110146_1_-1  |
| Tnk2    | -4.981 | -4.981 | -4.203 | -4.940 | -3.966 | -4.883 | -3.759 | -4.961 | -2.346 | -1.993 | 51789     | TNK2    | NM_001110147_16_+1 |
| Mgat1   | 0.391  | -0.037 | 1.299  | 0.510  | 0.729  | 0.715  | 1.090  | 1.110  | 3.299  | 3.493  | 17308     | MGAT1   | NM_001110148_11_+1 |
| Mgat1   | 6.529  | 6.551  | 3.237  | 3.876  | 2.769  | 2.982  | 4.007  | 3.735  | 4.762  | 4.369  | 17308     | MGAT1   | NM_001110149_11_+1 |
| Mgat1   | 6.042  | 5.958  | 4.862  | 4.437  | 4.446  | 4.343  | 3.981  | 4.840  | 4.875  | 4.927  | 17308     | MGAT1   | NM_001110150_11_+1 |
| Pfdn4   | 4.684  | 4.787  | 4.604  | 4.742  | 4.718  | 4.663  | 4.746  | 4.236  | 3.270  | 3.466  | 109054    | PFDN4   | NM_001110152_2_+1  |
| Nxt1    | 3.191  | 3.766  | 2.525  | 2.445  | 2.646  | 2.963  | 1.833  | 2.241  | 1.246  | 1.445  | 56488     | NXT1    | NM_001110159_2_+1  |
| Lrrc61  | 3.531  | 2.990  | 2.728  | 2.908  | 2.864  | 3.038  | 3.085  | 2.794  | 4.028  | 3.518  | 243371    | LRRC61  | NM_001110160_6_+1  |
| Cdca2   | -4.658 | -0.247 | 1.512  | 1.181  | 2.104  | 1.683  | 1.609  | 0.219  | 0.213  | 0.006  | 108912    | CDCA2   | NM_001110162_14_-1 |
| Inpp5d  | 3.435  | 3.986  | 5.267  | 5.611  | 4.521  | 4.200  | 4.446  | 3.882  | 5.447  | 5.386  | 16331     | INPP5D  | NM_001110192_1_+1  |
| Inpp5d  | 5.114  | 4.821  | 6.621  | 6.498  | 5.949  | 5.959  | 5.883  | 5.799  | 5.456  | 5.714  | 16331     | INPP5D  | NM_001110193_1_+1  |
| Echdc1  | 1.360  | 0.894  | 2.018  | 2.887  | 0.159  | 0.553  | 0.862  | 0.207  | -0.198 | 0.176  | 52665     | ECHDC1  | NM_001110195_10_+1 |
| Rnf146  | 3.269  | 3.097  | 3.088  | 2.712  | 2.845  | 3.174  | 3.051  | 2.943  | 2.612  | 2.806  | 68031     | RNF146  | NM_001110196_10_-1 |
| Rnf146  | 2.683  | 1.749  | 2.722  | 2.434  | 1.099  | 1.705  | 1.956  | 1.610  | 2.992  | 1.902  | 68031     | RNF146  | NM_001110197_10_-1 |
| Rnf146  | 1.596  | 2.356  | 2.101  | 1.676  | 1.448  | 0.948  | -0.354 | 0.583  | 0.446  | 2.538  | 68031     | RNF146  | NM_001110198_10_-1 |
| Yif1b   | 6.226  | 6.092  | 5.760  | 5.808  | 5.506  | 5.232  | 5.335  | 5.130  | 4.705  | 4.256  | 77254     | YIF1B   | NM_001110201_7_+1  |
| Acvr1   | -4.820 | -4.611 | -4.037 | -4.953 | -4.958 | -3.199 | -3.107 | -4.879 | -1.382 | -1.805 | 11477     | ACVR1   | NM_001110204_2_-1  |
| Acvr1   | 0.577  | 2.022  | 2.354  | 2.712  | 1.585  | 1.270  | 1.225  | 1.753  | 1.985  | 3.004  | 11477     | ACVR1   | NM_001110205_2_-1  |
| Akt2    | 2.986  | 3.548  | 3.848  | 4.456  | 3.565  | 4.139  | 2.805  | 3.758  | 4.114  | 4.766  | 11652     | AKT2    | NM_001110208_7_+1  |
| Lnpk1   | 2.519  | 3.077  | 3.171  | 1.968  | 2.144  | 2.053  | 1.841  | 1.677  | 2.487  | 2.286  | 69605     | LNPK    | NM_001110209_2_-1  |
| Anxa6   | 5.108  | 4.876  | 7.677  | 7.640  | 7.386  | 6.851  | 6.357  | 6.634  | 6.466  | 6.907  | 11749     | ANXA6   | NM_001110211_11_-1 |
| Gigyf2  | 0.889  | 2.073  | 2.748  | 3.023  | 3.132  | 2.666  | 2.450  | 1.941  | 2.075  | 2.922  | 227331    | GIGYF2  | NM_001110212_1_+1  |
| Dclre1c | 2.837  | 2.470  | 0.732  | -0.362 | 0.747  | 0.638  | 1.275  | 0.878  | 1.702  | 1.037  | 227525    | DCLRE1C | NM_001110214_2_+1  |
| Cbx5    | 2.733  | 2.462  | 1.660  | 1.116  | 0.419  | 1.252  | 2.285  | 0.534  | -3.615 | -0.699 | 12419     | CBX5    | NM_001110216_15_-1 |
| Ppm1h   | 6.591  | 5.947  | 4.951  | 4.787  | 3.717  | 3.850  | 5.005  | 4.688  | 5.148  | 5.141  | 319468    | PPM1H   | NM_001110218_10_+1 |
| Kcnj13  | -1.945 | -1.481 | -1.502 | -2.529 | -1.584 | -3.335 | -2.230 | -3.559 | -1.383 | -3.855 | 100040591 | KCNJ13  | NM_001110227_1_-1  |
| Celf2   | 5.644  | 5.989  | 5.213  | 5.013  | 5.571  | 5.559  | 5.417  | 5.146  | 4.614  | 4.887  | 14007     | CELF2   | NM_001110228_2_-1  |
| Celf2   | 5.876  | 5.811  | 6.142  | 6.179  | 6.050  | 5.770  | 5.969  | 5.774  | 5.497  | 5.479  | 14007     | CELF2   | NM_001110229_2_-1  |
| Celf2   | 2.818  | 3.106  | 2.557  | 2.119  | 2.597  | 2.475  | 2.418  | 2.180  | 1.948  | 2.108  | 14007     | CELF2   | NM_001110230_2_-1  |
| Celf2   | 2.356  | 2.291  | 3.591  | 3.637  | 3.332  | 3.546  | 3.104  | 2.513  | 2.011  | 2.532  | 14007     | CELF2   | NM_001110231_2_-1  |
| Celf2   | 3.317  | 3.607  | 3.074  | 2.641  | 3.138  | 3.039  | 2.959  | 2.736  | 2.395  | 2.572  | 14007     | CELF2   | NM_001110232_2_-1  |
| Bex3    | 1.640  | 2.289  | 1.251  | 1.260  | 1.259  | 1.201  | 0.081  | 0.698  | -2.658 | -1.466 | 12070     | BEX3    | NM_001110233_X_+1  |
| Bex3    | 4.184  | 3.956  | 3.498  | 3.590  | 3.553  | 3.510  | 3.302  | 2.846  | 0.911  | 0.124  | 12070     | BEX3    | NM_001110234_X_+1  |
| Acp1    | 5.827  | 5.285  | 4.688  | 4.501  | 4.763  | 4.517  | 4.669  | 4.288  | 4.559  | 3.896  | 11431     | ACP1    | NM_001110239_12_-1 |
| Ndufaf8 | 5.596  | 5.323  | 4.910  | 5.002  | 4.668  | 4.806  | 5.032  | 4.579  | 3.598  | 3.194  | 208501    | NDUFAF8 | NM_001110242_11_+1 |
| Hmbs    | 0.471  | 3.386  | -3.778 | 4.981  | 1.581  | 5.430  | 1.851  | 5.357  | 0.203  | 2.573  | 15288     | HMBS    | NM_001110251_9_-1  |
| Hpn     | -4.325 | -4.981 | -4.891 | -3.693 | -4.092 | -4.955 | -0.794 | -0.763 | 1.836  | 1.325  | 15451     | HPN     | NM_001110252_7_-1  |
| Fyco1   | 5.034  | 4.414  | 4.136  | 3.742  | 5.201  | 5.367  | 4.691  | 4.420  | 4.885  | 4.884  | 17281     | FYCO1   | NM_001110253_9_-1  |
| Zfp945  | 5.576  | 5.283  | 4.196  | 3.721  | 4.115  | 4.214  | 4.132  | 3.703  | 1.981  | 2.703  | 240041    | NA      | NM_001110254_17_-1 |
| Ttk     | -4.981 | -4.981 | -2.014 | -1.116 | -2.525 | -2.652 | -2.135 | -2.383 | -2.362 | -2.003 | 22137     | TTK     | NM_001110265_9_+1  |
| Vegfa   | -4.849 | -4.714 | -4.753 | -4.942 | -4.849 | -4.967 | -2.943 | -4.937 | -4.964 | -4.882 | 22339     | VEGFA   | NM_001110266_17_-1 |
| Vegfa   | -3.115 | -4.558 | -4.076 | -4.888 | -0.273 | -4.804 | -0.788 | -4.845 | -4.616 | -3.299 | 22339     | VEGFA   | NM_001110267_17_-1 |
| Vegfa   | -3.448 | -3.533 | -3.350 | -3.109 | -2.304 | -3.241 | 0.840  | -2.692 | -3.129 | -1.141 | 22339     | VEGFA   | NM_001110268_17_-1 |

|           |        |        |        |        |        |        |        |        |        |        |        |           |                       |
|-----------|--------|--------|--------|--------|--------|--------|--------|--------|--------|--------|--------|-----------|-----------------------|
| Abhd14a   | 2.690  | -1.623 | -2.388 | -4.867 | -1.309 | -4.951 | -1.465 | -4.886 | -0.680 | -4.896 | 68644  | ABHD14A   | NM_001110271_9_-1     |
| Abhd14a   | 1.341  | -0.120 | -3.441 | -3.546 | -4.902 | -4.991 | -1.703 | -3.994 | -3.495 | -3.933 | 68644  | ABHD14A   | NM_001110272_9_-1     |
| Slc14a2   | -4.981 | -4.981 | -4.945 | -4.945 | -1.845 | -0.777 | -3.592 | -3.718 | -4.981 | -4.981 | 27411  | SLC14A2   | NM_001110273_18_-1    |
| Its1      | 4.617  | 5.365  | 0.855  | 1.719  | 0.928  | 1.635  | 1.514  | 2.165  | 2.972  | 3.541  | 16443  | ITSN1     | NM_001110275_16_+1    |
| Its1      | 1.388  | 1.658  | -1.775 | -1.209 | -1.950 | -1.353 | -1.282 | -1.060 | -0.228 | 0.152  | 16443  | ITSN1     | NM_001110276_16_+1    |
| Ap1m2     | 2.306  | 0.072  | -3.103 | -4.127 | -1.838 | -2.797 | -2.439 | -2.127 | -3.248 | -4.965 | 11768  | AP1M2     | NM_001110300_9_-1     |
| Keap1     | 2.045  | 1.563  | 1.702  | 1.601  | 1.561  | 1.168  | 1.673  | 0.134  | 2.930  | 1.833  | 50868  | KEAP1     | NM_001110305_9_-1     |
| Keap1     | 1.334  | 1.397  | 1.773  | 1.180  | 1.517  | 0.775  | 1.542  | -0.320 | 2.863  | 1.898  | 50868  | KEAP1     | NM_001110306_9_-1     |
| Keap1     | 4.966  | 4.518  | 4.988  | 5.053  | 4.581  | 4.494  | 4.689  | 4.900  | 5.701  | 5.419  | 50868  | KEAP1     | NM_001110307_9_-1     |
| Zfp426    | 3.449  | 3.528  | 3.114  | 2.826  | 3.420  | 3.579  | 3.258  | 2.910  | 3.173  | 3.475  | 235028 | ZNF426    | NM_001110309_9_-1     |
| Snx12     | 4.054  | 4.471  | 4.383  | 4.389  | 3.882  | 3.828  | 3.950  | 4.380  | 4.407  | 4.695  | 55988  | SNX12     | NM_001110310_X_-1     |
| Snx12     | 0.938  | 1.795  | 0.370  | -0.336 | 1.127  | -0.168 | 0.721  | -0.165 | 0.573  | -0.148 | 55988  | SNX12     | NM_001110311_X_-1     |
| Kif1a     | -2.660 | -2.635 | -0.631 | 0.452  | -1.799 | -2.658 | -3.649 | -3.194 | -4.981 | -1.787 | 16560  | KIF1A     | NM_001110315_1_-1     |
| Cd72      | 5.695  | 3.696  | 1.167  | -0.290 | 5.234  | 3.378  | 4.190  | 3.332  | -4.438 | 1.685  | 12517  | CD72      | NM_001110320_4_-1     |
| Cd72      | 5.537  | -0.589 | -0.136 | -3.914 | 4.711  | -0.662 | 3.696  | -1.590 | -4.679 | -4.971 | 12517  | CD72      | NM_001110321_4_-1     |
| Cd72      | 4.021  | 0.033  | -0.502 | -3.596 | 4.287  | -0.230 | 2.771  | -2.491 | -2.815 | -4.981 | 12517  | CD72      | NM_001110322_4_-1     |
| Klra7     | -4.981 | -1.298 | -4.989 | -2.590 | -4.617 | -4.037 | -2.361 | -4.770 | -2.742 | -4.981 | 16638  | NA        | NM_001110323_6_-1     |
| Dmtf1     | 5.239  | 5.036  | 4.821  | 4.329  | 5.054  | 4.930  | 4.916  | 4.560  | 4.904  | 4.668  | 23857  | DMTF1     | NM_001110327_5_-1     |
| Fiz1      | 0.319  | 1.830  | 1.958  | 1.740  | 1.919  | 0.983  | -0.760 | 1.016  | 2.380  | 1.568  | 23877  | FIZ1      | NM_001110328_7_-1     |
| Fiz1      | 2.641  | 2.388  | 3.163  | 3.117  | 3.002  | 2.864  | 3.556  | 3.022  | 3.484  | 4.103  | 23877  | FIZ1      | NM_001110329_7_-1     |
| Fiz1      | 3.683  | 3.586  | 3.220  | 3.303  | 2.877  | 2.479  | 2.481  | 3.224  | 4.030  | 3.182  | 23877  | FIZ1      | NM_001110330_7_-1     |
| Eci2      | 5.956  | 5.729  | 4.923  | 4.782  | 5.058  | 5.024  | 4.581  | 4.523  | 4.118  | 4.180  | 23986  | ECI2      | NM_001110331_13_-1    |
| Gprc5c    | 1.466  | 2.448  | 5.643  | 5.136  | 0.295  | 2.669  | 0.585  | 2.464  | 2.090  | 1.619  | 70355  | GPRC5C    | NM_001110337_11_+1    |
| Gprc5c    | -0.388 | -0.550 | 0.582  | 0.169  | -1.206 | -2.379 | -4.383 | -0.694 | -2.199 | -2.434 | 70355  | GPRC5C    | NM_001110338_11_+1    |
| Sin3a     | 2.364  | 1.248  | 0.799  | 1.629  | 1.394  | 1.961  | 2.557  | 1.555  | 2.292  | 2.392  | 20466  | SIN3A     | NM_001110350_9_+1     |
| Sin3a     | 3.736  | 4.144  | 4.398  | 4.183  | 4.821  | 4.638  | 4.724  | 4.496  | 4.865  | 4.785  | 20466  | SIN3A     | NM_001110351_9_+1     |
| Tmem87a   | 2.009  | 4.051  | 1.172  | 4.621  | 1.502  | 3.832  | 0.953  | 3.964  | 1.517  | 5.077  | 211499 | TMEM87A   | NM_001110496_2_-1     |
| Tmem87a   | 0.779  | 2.844  | 1.051  | 1.552  | 1.087  | 1.627  | 0.172  | 0.546  | -0.404 | 0.682  | 211499 | TMEM87A   | NM_001110497_2_-1     |
| Ifnar2    | 9.135  | 9.401  | 6.235  | 6.236  | 6.914  | 6.803  | 7.212  | 7.272  | 6.867  | 6.894  | 15976  | IFNAR2    | NM_001110498_16_+1    |
| Canx      | 3.583  | 3.060  | 3.090  | 3.325  | 2.516  | 2.345  | 2.626  | 3.293  | 3.416  | 3.739  | 12330  | CANX      | NM_001110499_11_-1    |
| Canx      | 5.545  | 5.360  | 4.978  | 5.252  | 4.330  | 4.296  | 4.819  | 4.678  | 4.654  | 5.603  | 12330  | CANX      | NM_001110500_11_-1    |
| Capn1     | -0.426 | 3.128  | 0.979  | 3.364  | 2.364  | 3.805  | 2.276  | 2.873  | 2.642  | 3.878  | 12333  | CAPN1     | NM_001110504_19_-1    |
| Amy1      | -0.467 | -1.231 | -3.921 | -4.530 | -3.416 | -4.772 | -3.040 | -4.101 | -1.260 | -3.229 | 11722  | AMY2A     | NM_001110505_3_-1     |
| Efcab12   | -1.081 | -4.981 | -4.241 | -4.978 | -2.911 | -4.366 | -3.507 | -4.542 | -4.981 | -2.480 | 212516 | EFCAB12   | NM_001110506_6_-1     |
| Zfp703    | -3.998 | -3.592 | -2.360 | -2.499 | -2.495 | -4.389 | -1.948 | -0.792 | -4.552 | 0.456  | 353310 | ZNF703    | NM_001110508_8_+1     |
| Mettl8    | 1.710  | -1.102 | -0.954 | -0.560 | -0.979 | -1.681 | -1.081 | -1.435 | -0.048 | -0.328 | 228019 | METTL8    | NM_001110512_2_-1     |
| Psmg4     | 4.535  | 4.421  | 3.841  | 3.619  | 3.107  | 3.070  | 3.971  | 3.524  | 3.425  | 3.095  | 69666  | PSMG4     | NM_001110515_13_+1    |
| Samd11    | -2.716 | -1.683 | -3.397 | 1.063  | -4.325 | 1.955  | -2.879 | 2.243  | -4.153 | 0.985  | 231004 | SAMD11    | NM_001110516_4_-1     |
| Ifit1b1   | -4.619 | -4.278 | 1.460  | 1.046  | 3.564  | 2.395  | 2.697  | 0.751  | 2.752  | 1.700  | 667373 | IFIT1     | NM_001110517_19_-1    |
| Hist1h2br | -2.360 | -2.243 | -0.814 | -0.481 | -1.148 | -0.318 | -0.542 | -2.349 | -1.927 | -1.550 | 665622 | HIST1H2BH | NM_001110555_13_-1    |
| Hist1h2br | -2.574 | -1.027 | -1.016 | -0.347 | -0.695 | -1.792 | -1.510 | -1.473 | -0.868 | -2.933 | 665622 | HIST1H2BH | NM_001110555_dup13_+1 |
| Adam11    | 6.533  | 3.329  | 4.105  | 3.008  | 6.342  | 4.866  | 4.506  | 1.035  | -1.283 | -2.680 | 11488  | ADAM11    | NM_001110778_11_+1    |
| Syn1      | -2.368 | -4.981 | -3.440 | -4.171 | -3.135 | -4.392 | -3.276 | -2.384 | -1.697 | -3.085 | 20964  | SYN1      | NM_001110780_X_-1     |
| Ank1      | -4.981 | -4.211 | -4.937 | -4.770 | -4.944 | -4.977 | -4.889 | -4.751 | -4.919 | -4.620 | 11733  | ANK1      | NM_001110783_8_+1     |
| Xlr3a     | 0.589  | 1.961  | 0.675  | 1.253  | -0.280 | 0.619  | -0.095 | 0.922  | -2.260 | 1.080  | 22445  | NA        | NM_001110784_X_-1     |
| Sf1       | 4.514  | 4.494  | 4.831  | 5.290  | 5.412  | 4.718  | 4.785  | 4.738  | 5.107  | 5.217  | 22668  | NA        | NM_001110791_19_+1    |
| Anxa7     | 6.857  | 6.994  | 7.058  | 7.035  | 5.339  | 5.556  | 5.711  | 6.142  | 6.572  | 6.740  | 11750  | ANXA7     | NM_001110794_14_-1    |
| Capn12    | -1.951 | -2.293 | -1.992 | -2.251 | -2.802 | -1.209 | -2.434 | -3.492 | -3.568 | -3.627 | 60594  | CAPN12    | NM_001110807_7_+1     |
| Gpatch4   | 3.996  | 3.704  | 3.723  | 3.543  | 3.618  | 2.868  | 3.385  | 2.922  | 2.299  | 1.621  | 66614  | GPATCH4   | NM_001110809_3_+1     |
| Foxp4     | 1.022  | -0.373 | -1.931 | 0.941  | 0.934  | 0.799  | 0.794  | -2.400 | -0.507 | -0.453 | 74123  | FOXP4     | NM_001110824_17_-1    |
| Foxp4     | 1.973  | 1.833  | 2.466  | 1.575  | 3.114  | 2.206  | 2.454  | 1.759  | 1.286  | 1.697  | 74123  | FOXP4     | NM_001110825_17_-1    |
| Ddx6      | 3.834  | 3.730  | 4.456  | 4.346  | 4.267  | 3.776  | 3.998  | 3.292  | 3.567  | 3.491  | 13209  | DDX6      | NM_001110826_9_+1     |
| Rbfox2    | -4.981 | -4.981 | -4.964 | -4.811 | -4.976 | -4.965 | -3.973 | -4.504 | -4.981 | -4.906 | 93686  | RBFOX2    | NM_001110827_15_-1    |
| Rbfox2    | -4.981 | -4.981 | -4.959 | -4.959 | -4.978 | -4.694 | -4.527 | -4.577 | -4.981 | -2.852 | 93686  | RBFOX2    | NM_001110828_15_-1    |
| Rbfox2    | -4.981 | -4.981 | -4.981 | -4.981 | -4.981 | -4.981 | -4.506 | -4.443 | -4.981 | -4.868 | 93686  | RBFOX2    | NM_001110829_15_-1    |
| Rbfox2    | -4.981 | -4.981 | -4.958 | -4.958 | -4.976 | -4.443 | -4.489 | -4.425 | -4.981 | -2.374 | 93686  | RBFOX2    | NM_001110830_15_-1    |
| Dnpep     | 4.156  | 4.106  | 3.228  | 3.297  | 2.523  | 2.275  | 2.997  | 3.110  | 3.914  | 3.809  | 13437  | DNPEP     | NM_001110831_1_-1     |
| Nfya      | 1.764  | 0.922  | 1.823  | 1.988  | 1.850  | 1.559  | 1.111  | 1.247  | -0.028 | 0.632  | 18044  | NFYA      | NM_001110832_17_-1    |
| Prr5l     | 1.555  | 0.863  | 6.553  | 1.112  | 5.344  | -1.521 | 2.843  | -0.310 | -2.698 | -2.290 | 72446  | PRR5L     | NM_001110849_2_-1     |
| Crem      | -0.631 | 0.997  | -3.072 | -0.701 | -2.087 | -2.257 | -1.334 | -4.330 | -4.333 | -0.235 | 12916  | CREM      | NM_001110850_18_-1    |
| Crem      | 1.153  | 1.856  | -0.606 | 0.368  | 0.301  | 0.048  | -0.220 | -1.032 | -0.427 | 1.009  | 12916  | CREM      | NM_001110851_18_-1    |
| Crem      | 0.812  | 0.818  | -0.316 | -0.876 | -0.531 | -2.192 | 0.424  | -1.221 | 0.515  | -0.150 | 12916  | CREM      | NM_001110852_18_-1    |
| Crem      | -4.210 | -3.408 | -4.976 | -4.875 | -3.713 | -4.916 | -3.796 | -4.956 | -4.954 | -4.977 | 12916  | CREM      | NM_001110853_18_-1    |
| Crem      | 3.567  | 3.812  | 1.438  | 2.000  | 0.737  | 1.450  | -0.043 | 1.198  | -4.267 | 0.227  | 12916  | CREM      | NM_001110854_18_-1    |
| Crem      | 4.260  | 5.665  | 2.002  | 1.787  | 2.415  | 2.383  | 1.729  | 2.189  | -1.650 | -0.983 | 12916  | CREM      | NM_001110855_18_-1    |
| Crem      | -0.707 | 1.309  | -1.628 | -2.490 | -0.100 | -0.600 | -3.849 | -4.713 | -0.037 | -0.101 | 12916  | CREM      | NM_001110856_18_-1    |
| Crem      | -0.232 | -0.567 | -3.338 | -4.040 | -4.917 | -4.495 | -3.735 | -3.366 | -4.611 | -3.228 | 12916  | CREM      | NM_001110857_18_-1    |
| Crem      | -1.835 | -0.384 | -4.695 | -3.933 | -4.238 | -3.790 | -3.829 | -3.619 | -3.852 | -4.838 | 12916  | CREM      | NM_001110858_18_-1    |
| Crem      | -2.475 | -1.143 | -4.972 | -3.724 | -4.784 | -4.021 | -3.224 | -4.702 | -4.945 | -4.970 | 12916  | CREM      | NM_001110859_18_-1    |
| Nav2      | -0.197 | 3.250  | -4.765 | -3.060 | -3.898 | -3.461 | -4.348 | -2.214 | -0.115 | -2.065 | 78286  | NAV2      | NM_001111016_7_+1     |
| Serac1    | 0.600  | 1.042  | -0.579 | 0.973  | 0.024  | 0.163  | -0.481 | 0.316  | 0.712  | 0.924  | 321007 | SERAC1    | NM_001111017_17_-1    |
| Runx1     | 2.370  | 1.427  | 4.839  | 4.408  | 3.197  | 3.123  | 3.714  | 3.792  | 3.582  | 3.587  | 12394  | RUNX1     | NM_001111021_16_-1    |
| Runx1     | 1.234  | 1.463  | 3.834  | 3.178  | 2.124  | 1.955  | 2.163  | 2.348  | 2.210  | 1.793  | 12394  | RUNX1     | NM_001111022_16_-1    |
| Runx1     | 3.215  | 3.471  | 2.535  | 2.522  | 2.748  | 3.637  | 4.171  | 4.332  | 4.807  | 5.066  | 12394  | RUNX1     | NM_001111023_16_-1    |

|               |        |        |        |        |        |        |        |        |        |        |           |           |                    |
|---------------|--------|--------|--------|--------|--------|--------|--------|--------|--------|--------|-----------|-----------|--------------------|
| Pigx          | 3.870  | 4.076  | 2.584  | 2.661  | 2.987  | 3.130  | 3.469  | 2.957  | 3.205  | 2.704  | 72084     | PIGX      | NM_001111025_16_-1 |
| Runx1t1       | -4.981 | -1.494 | -4.957 | -4.957 | -4.488 | -4.823 | -4.963 | -4.713 | -4.981 | -4.499 | 12395     | RUNX1T1   | NM_001111026_4_+1  |
| Runx1t1       | -4.981 | -3.807 | -4.967 | -4.967 | -4.768 | -4.936 | -4.974 | -4.342 | -4.981 | -4.801 | 12395     | RUNX1T1   | NM_001111027_4_+1  |
| Kctd9         | 1.110  | 2.189  | 2.647  | 2.637  | 1.590  | 0.498  | 1.866  | 0.885  | 2.689  | 2.457  | 105440    | KCTD9     | NM_001111028_14_+1 |
| Zfp661        | 1.762  | 1.658  | 0.728  | 0.756  | -0.035 | 0.530  | -0.259 | -0.186 | 0.963  | 1.015  | 72180     | ZN2F      | NM_001111029_2_-1  |
| Acvr1c        | -4.981 | -4.513 | -1.455 | -3.055 | -2.358 | -2.097 | -4.036 | -4.968 | -4.981 | -4.981 | 269275    | ACVR1C    | NM_001111030_2_-1  |
| Serpinh1      | 2.681  | 2.282  | -4.460 | -4.900 | -4.932 | -4.265 | -4.760 | -4.833 | -4.746 | -4.981 | 12406     | SERPINH1  | NM_001111043_7_-1  |
| Serpinh1      | 3.189  | 2.825  | -3.313 | -2.760 | -4.966 | -2.919 | -3.570 | -3.661 | -4.042 | -4.981 | 12406     | SERPINH1  | NM_001111044_7_-1  |
| Cd151         | -0.218 | -0.886 | 0.268  | -0.187 | -0.308 | -0.373 | -0.146 | -2.020 | 1.615  | 1.559  | 12476     | CD151     | NM_001111049_7_+1  |
| Cd151         | 0.379  | -0.170 | -2.544 | -1.859 | -4.783 | -4.876 | -2.775 | -3.313 | -4.470 | -3.923 | 12476     | CD151     | NM_001111050_7_+1  |
| Dcl1k1        | -3.179 | -4.981 | -4.570 | -3.821 | -4.888 | -4.968 | -2.285 | -3.109 | -4.981 | -4.981 | 13175     | DCLK1     | NM_001111053_3_+1  |
| Cd33          | 2.240  | 1.247  | -0.081 | -0.976 | -0.063 | -0.382 | 0.173  | 0.756  | 3.440  | 2.246  | 12489     | NA        | NM_001111058_7_-1  |
| Cd34          | -4.774 | -4.530 | -1.090 | -1.274 | -0.030 | 0.144  | -2.346 | -2.148 | -1.672 | -2.251 | 12490     | CD34      | NM_001111059_1_+1  |
| Cd59a         | -2.277 | 0.990  | -4.599 | -0.556 | -2.374 | -3.572 | -4.963 | -3.539 | -4.940 | -4.872 | 12509     | NA        | NM_001111060_2_+1  |
| Comt          | 5.959  | 5.725  | 4.769  | 5.074  | 4.867  | 5.492  | 5.276  | 5.894  | 6.192  | 6.264  | 12846     | COMT      | NM_001111062_16_-1 |
| Comt          | 3.441  | 4.650  | 1.901  | 2.331  | 3.381  | 2.839  | 3.484  | 3.362  | 3.836  | 3.899  | 12846     | COMT      | NM_001111063_16_-1 |
| Reps1         | 3.608  | 3.210  | 3.601  | 3.339  | 3.827  | 3.233  | 3.970  | 3.415  | 4.358  | 4.205  | 19707     | REPS1     | NM_001111065_10_+1 |
| Fkbp8         | 6.881  | 6.758  | 6.624  | 6.702  | 6.883  | 6.811  | 6.685  | 6.737  | 6.885  | 6.794  | 14232     | FKBP8     | NM_001111066_8_+1  |
| Fxyd5         | 0.602  | 0.136  | 2.442  | 2.204  | 2.202  | 1.462  | 3.885  | 3.546  | 5.064  | 4.406  | 18301     | FXYD5     | NM_001111073_7_-1  |
| Cdc25b        | -0.612 | 0.518  | 0.850  | 1.796  | 2.074  | 2.316  | 2.144  | 2.420  | 2.317  | 1.913  | 12531     | CDC25B    | NM_001111075_2_+1  |
| Zfp182        | 2.771  | 2.597  | 2.213  | 1.638  | 2.484  | 2.050  | 2.562  | 1.899  | 2.390  | 3.183  | 319535    | ZN2F182   | NM_001111077_X_-1  |
| Uhrf1         | -0.562 | -0.781 | 1.635  | 1.936  | 3.134  | 3.262  | 0.328  | 0.355  | 1.361  | 0.425  | 18140     | UHRF1     | NM_001111078_17_+1 |
| Uhrf1         | -4.208 | -3.848 | 1.930  | 1.123  | 2.088  | 0.104  | 1.611  | 1.964  | -1.198 | -2.216 | 18140     | UHRF1     | NM_001111079_17_+1 |
| Uhrf1         | -0.137 | -0.416 | 0.490  | 0.298  | 0.647  | -0.151 | -2.473 | -0.802 | -0.881 | -0.966 | 18140     | UHRF1     | NM_001111080_17_+1 |
| Btnl1         | -4.981 | -4.981 | -3.249 | -3.079 | -2.096 | -2.786 | -3.056 | -2.993 | -4.981 | -4.981 | 100038862 | NA        | NM_001111094_17_+1 |
| Lyn           | 7.610  | 7.817  | 8.169  | 8.097  | 8.624  | 8.712  | 8.722  | 8.988  | 9.431  | 9.947  | 17096     | LYN       | NM_001111096_4_+1  |
| Cdkn1a        | -2.905 | -4.689 | -2.230 | -0.586 | -4.945 | -4.979 | -0.868 | -1.506 | -0.523 | -4.882 | 12575     | CDKN1A    | NM_001111099_17_+1 |
| Lipa          | 1.506  | 2.387  | 4.664  | 4.742  | 3.149  | 3.430  | 3.452  | 4.189  | 4.145  | 4.831  | 16889     | LIPA      | NM_001111100_19_-1 |
| Lmna          | 1.191  | 1.831  | 1.168  | 3.434  | 0.008  | 2.894  | 1.792  | 4.150  | 3.017  | 4.996  | 16905     | LMNA      | NM_001111102_3_-1  |
| Uba3          | 4.401  | 4.645  | 3.152  | 3.778  | 3.123  | 3.317  | 3.608  | 3.159  | 3.637  | 4.340  | 22200     | UBA3      | NM_001111106_6_-1  |
| Zfp322a       | 3.013  | -2.688 | 3.181  | -2.254 | 2.745  | -4.164 | 2.374  | -3.864 | 2.242  | -3.252 | 218100    | ZN2F322   | NM_001111107_13_-1 |
| Cmah          | 6.853  | 8.283  | -4.036 | 4.782  | -3.114 | 3.922  | -0.422 | 5.722  | -4.165 | 3.676  | 12763     | NA        | NM_001111110_13_+1 |
| Atg16l2       | 3.130  | 2.764  | 4.803  | 4.788  | 3.627  | 3.511  | 3.607  | 3.986  | 3.731  | 3.536  | 73683     | ATG16L2   | NM_001111111_7_-1  |
| Ccnb1ip1      | -4.981 | -4.981 | -4.224 | -1.417 | -5.022 | -3.890 | -4.827 | -0.523 | -4.981 | -4.981 | 239083    | CCNB1IP1  | NM_001111119_14_-1 |
| Ccdc6         | 4.042  | 4.460  | 4.123  | 4.244  | 4.122  | 4.364  | 3.612  | 3.843  | 3.228  | 3.437  | 76551     | CCDC6     | NM_001111121_10_+1 |
| Lrrc10b       | -0.683 | -3.408 | -4.962 | -4.962 | -4.968 | -4.968 | -4.981 | -4.981 | -4.190 | -4.981 | 278795    | LRRC10B   | NM_001111140_19_-1 |
| Sprtn         | 0.896  | 1.869  | 1.355  | 0.716  | 1.166  | 0.929  | 1.121  | 0.411  | 1.436  | 0.969  | 244666    | SPRNT     | NM_001111141_8_+1  |
| Lrrc73        | -4.981 | -2.133 | -2.761 | -2.416 | -4.739 | -3.204 | -3.588 | -4.020 | -4.981 | -3.853 | 224813    | LRRC73    | NM_001111142_17_+1 |
| Ncoa7         | 2.443  | 2.166  | 8.353  | 8.054  | 3.750  | 3.940  | 4.171  | 4.283  | 3.653  | 2.706  | 211329    | NCOA7     | NM_001111267_10_-1 |
| Stau2         | 1.017  | 1.339  | -0.737 | 0.542  | 1.566  | 2.207  | -0.410 | -0.058 | -1.887 | -0.593 | 29819     | STAU2     | NM_001111272_1_-1  |
| Igf1          | -0.560 | -1.265 | -4.670 | -4.824 | -2.809 | -4.767 | -4.122 | -3.266 | -4.698 | -4.698 | 16000     | IGF1      | NM_001111274_10_+1 |
| Igf1          | 2.428  | 1.453  | 2.091  | 1.850  | 2.634  | 1.571  | 2.470  | 3.170  | -0.160 | 1.380  | 16000     | IGF1      | NM_001111275_10_+1 |
| Igf1          | -4.182 | -1.707 | -4.639 | -3.109 | -1.855 | -3.068 | -4.343 | -4.892 | -4.700 | -4.586 | 16000     | IGF1      | NM_001111276_10_+1 |
| Eif2b3        | 4.558  | 4.564  | 3.705  | 3.973  | 4.066  | 4.341  | 3.726  | 4.355  | 3.173  | 3.135  | 108067    | EIF2B3    | NM_001111277_4_+1  |
| Wdfy1         | 5.420  | 5.461  | 4.809  | 5.187  | 3.411  | 3.742  | 3.866  | 4.770  | 5.220  | 5.444  | 69368     | WDFY1     | NM_001111279_1_-1  |
| Sco2          | 3.064  | 3.163  | 2.021  | 1.884  | 1.016  | 1.288  | 1.323  | 1.551  | 1.777  | 1.262  | 100126824 | SCO2      | NM_001111288_15_-1 |
| Caprin1       | 5.958  | 5.733  | 6.938  | 7.012  | 6.273  | 6.207  | 6.109  | 6.285  | 6.320  | 7.112  | 53872     | CAPRIN1   | NM_001111289_2_-1  |
| Caprin1       | 1.740  | 0.240  | 3.603  | 1.536  | 2.190  | 2.352  | 2.484  | 2.174  | 1.890  | 2.074  | 53872     | CAPRIN1   | NM_001111290_2_-1  |
| Caprin1       | 3.020  | 3.706  | 3.698  | 3.180  | 3.661  | 3.521  | 3.599  | 3.245  | 4.067  | 2.713  | 53872     | CAPRIN1   | NM_001111291_2_-1  |
| Caprin1       | 3.438  | 3.371  | 4.829  | 4.586  | 3.798  | 3.343  | 3.259  | 3.403  | 4.284  | 4.027  | 53872     | CAPRIN1   | NM_001111292_2_-1  |
| Tbc1d9        | 1.260  | -4.805 | 7.321  | 6.231  | 7.537  | 6.926  | 6.322  | 4.535  | 4.241  | 3.561  | 71310     | TBC1D9    | NM_001111304_8_+1  |
| Lrrfip1       | 6.501  | 6.657  | 7.106  | 6.978  | 7.503  | 7.303  | 7.494  | 7.183  | 8.087  | 7.623  | 16978     | LRRFIP1   | NM_001111311_1_+1  |
| Lrrfip1       | 2.593  | 3.056  | 2.256  | 1.900  | 2.993  | 2.902  | 3.088  | 2.227  | 2.837  | 2.420  | 16978     | LRRFIP1   | NM_001111312_1_+1  |
| Ptprc         | 8.382  | 8.453  | 4.900  | 4.537  | 5.239  | 5.670  | 4.577  | 6.063  | 3.363  | 3.527  | 19264     | PTPRC     | NM_001111316_1_-1  |
| Idh1          | -0.770 | 0.804  | 0.128  | 1.427  | -1.526 | -4.693 | -0.937 | 1.255  | 2.792  | 2.256  | 15926     | IDH1      | NM_001111320_1_-1  |
| Nedd9         | 4.809  | 4.667  | 6.177  | 6.278  | 6.410  | 6.115  | 6.715  | 7.302  | 8.065  | 8.087  | 18003     | NEDD9     | NM_001111324_13_-1 |
| Kcnp3         | -0.866 | -4.981 | 0.645  | -2.888 | 1.441  | -0.201 | 0.597  | -2.548 | -1.408 | -4.866 | 56461     | KCNIP3    | NM_001111331_2_-1  |
| Cyth1         | -2.991 | -2.988 | 0.818  | 1.250  | 0.492  | -1.674 | -0.123 | -0.826 | 0.807  | 1.591  | 19157     | CYTH1     | NM_001112699_11_-1 |
| Cyth1         | 4.048  | 4.050  | 5.427  | 5.524  | 3.718  | 3.156  | 4.337  | 4.642  | 6.116  | 5.548  | 19157     | CYTH1     | NM_001112700_11_-1 |
| Cyth2         | 4.879  | 4.884  | 4.208  | 4.206  | 4.239  | 4.181  | 3.968  | 4.142  | 4.532  | 4.204  | 19158     | CYTH2     | NM_001112701_7_-1  |
| Tnni1         | -0.700 | -4.981 | -1.535 | -2.345 | -0.949 | -3.869 | -4.877 | -4.098 | -4.981 | -4.981 | 21952     | TNNI1     | NM_001112702_1_+1  |
| Abl1          | 2.465  | 3.104  | 2.908  | 2.492  | 2.791  | 2.971  | 3.135  | 2.678  | 4.580  | 4.622  | 11350     | ABL1      | NM_001112703_2_+1  |
| Tlk2          | 3.685  | 3.281  | 3.425  | 3.654  | 3.183  | 3.192  | 3.487  | 3.584  | 4.133  | 3.957  | 24086     | TLK2      | NM_001112705_11_+1 |
| Grk6          | 4.026  | 4.174  | 3.634  | 2.792  | 3.250  | 3.664  | 2.954  | 4.390  | 3.600  | 2.670  | 26385     | GRK6      | NM_001112711_13_+1 |
| Ralgapa1      | 3.445  | 4.458  | 4.748  | 4.393  | 4.985  | 5.182  | 4.580  | 4.664  | 4.815  | 4.873  | 56784     | RALGAPA1  | NM_001112714_12_-1 |
| Ifitm1        | -4.195 | -1.221 | -1.082 | 2.101  | 7.323  | 6.549  | 6.232  | 3.531  | -1.067 | -1.029 | 68713     | NA        | NM_001112715_7_+1  |
| Ubr5          | 3.400  | 2.943  | 3.998  | 3.970  | 4.704  | 4.646  | 3.915  | 3.944  | 3.457  | 3.857  | 70790     | UBR5      | NM_001112721_15_-1 |
| Arhgef10l     | 1.256  | 1.180  | -3.369 | -4.149 | -4.445 | -4.326 | 0.964  | 1.173  | 3.656  | 3.310  | 72754     | ARHGEF10L | NM_001112722_4_-1  |
| Arhgef10l     | 4.021  | 5.078  | -1.294 | 0.649  | 0.459  | 0.112  | 5.059  | 5.219  | 7.208  | 7.205  | 72754     | ARHGEF10L | NM_001112723_4_-1  |
| Zfp607b       | 1.256  | 0.727  | -0.389 | -1.566 | 0.061  | 0.906  | -0.630 | -0.011 | -0.595 | -0.941 | 112415    | ZN2F780A  | NM_001112731_7_+1  |
| 9930012K11Rik | -0.991 | -0.112 | -0.927 | -0.931 | -2.274 | -1.220 | -1.103 | -0.513 | -2.348 | -1.883 | 268759    | C8orf58   | NM_001112735_14_-1 |
| Atp5c1        | 1.527  | 1.006  | 0.337  | 0.868  | 0.055  | 0.091  | 0.348  | 0.253  | -0.229 | 0.362  | 11949     | ATP5C1    | NM_001112738_2_-1  |
| Kcnc1         | -4.981 | -4.981 | -4.979 | -3.682 | -2.999 | -4.902 | -4.949 | -3.388 | -2.834 | -4.227 | 16502     | KCNC1     | NM_001112739_7_+1  |
| Arhgef16      | -4.981 | 0.530  | -4.712 | 0.807  | -4.842 | 1.159  | -4.882 | -1.392 | -4.981 | -3.480 | 230972    | ARHGEF16  | NM_001112744_4_-1  |

|         |        |        |        |        |        |        |        |        |        |        |           |             |                     |
|---------|--------|--------|--------|--------|--------|--------|--------|--------|--------|--------|-----------|-------------|---------------------|
| Bicd1   | 0.877  | 2.667  | 0.020  | 0.954  | 0.236  | 1.412  | -0.722 | -0.143 | -3.378 | -1.505 | 12121     | BICD1       | NM_001112796_6_+_1  |
| Slc8a1  | 1.157  | 1.406  | 2.076  | 1.860  | 2.763  | 3.111  | 2.391  | 2.201  | 0.735  | 2.870  | 20541     | SLC8A1      | NM_001112798_17_-_1 |
| Zfp78   | -1.167 | -0.378 | -1.821 | -3.570 | -1.981 | -2.817 | 0.138  | -4.082 | -1.148 | -1.140 | 330463    | ZNFX471     | NM_001112805_7_+_1  |
| Cacna1g | -4.981 | -4.981 | -4.953 | -4.043 | -3.331 | -3.207 | -4.925 | -4.486 | -4.981 | -4.981 | 12291     | CACNA1G     | NM_001112813_11_-_1 |
| Bub1    | -2.403 | -4.981 | 1.033  | 1.254  | 2.289  | 1.268  | 2.240  | 1.155  | 0.569  | -0.942 | 12235     | BUB1        | NM_001113179_2_-_1  |
| Khdc1b  | -4.981 | -4.981 | -4.668 | -4.950 | -3.410 | -4.954 | -3.390 | -4.929 | -3.373 | -4.981 | 98582     | KHDC1L      | NM_001113187_1_+_1  |
| Fxr1    | 3.128  | 3.173  | 2.920  | 3.225  | 3.435  | 3.354  | 2.829  | 2.947  | 3.168  | 3.238  | 14359     | FXR1        | NM_001113188_3_+_1  |
| Fxr1    | 3.888  | 4.173  | 4.230  | 4.347  | 3.836  | 4.213  | 3.885  | 3.600  | 3.766  | 4.131  | 14359     | FXR1        | NM_001113189_3_+_1  |
| Mitf    | 2.523  | 3.110  | 1.838  | 1.521  | 0.681  | 1.528  | 1.887  | 2.320  | 2.993  | 3.306  | 17342     | MITF        | NM_001113198_6_+_1  |
| Naca    | 1.225  | 1.151  | 1.771  | 1.716  | 1.937  | 1.717  | 1.089  | 1.305  | 0.727  | 0.492  | 17938     | NACA        | NM_001113199_10_+_1 |
| Ncam1   | -4.860 | -4.437 | -4.981 | -4.981 | -4.976 | -4.981 | -4.977 | -4.980 | -4.777 | -4.953 | 17967     | NCAM1       | NM_001113204_9_-_1  |
| Nfib    | -3.978 | -4.333 | -4.981 | -4.861 | -4.976 | -4.962 | -4.872 | -4.912 | -4.544 | -4.877 | 18028     | NFIB        | NM_001113209_4_-_1  |
| Nfib    | -3.898 | -4.292 | -4.981 | -4.846 | -4.975 | -4.955 | -4.864 | -4.903 | -4.519 | -4.867 | 18028     | NFIB        | NM_001113210_4_-_1  |
| Nemp1   | 1.599  | 2.292  | 2.550  | 1.714  | 2.482  | 1.932  | 2.464  | 2.029  | 3.153  | 2.641  | 210035    | NEMP1       | NM_001113211_10_+_1 |
| Odf2    | 4.118  | 4.360  | 4.223  | 4.561  | 4.694  | 4.726  | 4.798  | 4.715  | 4.936  | 4.681  | 18286     | ODF2        | NM_001113213_2_+_1  |
| Odf2    | -2.908 | -4.755 | -4.886 | -4.837 | -4.848 | -4.970 | -4.294 | -3.921 | -4.439 | -3.208 | 18286     | ODF2        | NM_001113214_2_+_1  |
| Fcrl5   | -4.981 | 1.296  | -3.502 | 0.816  | -2.900 | 1.461  | -4.503 | 3.352  | -4.981 | -0.408 | 329693    | FCRL5       | NM_001113238_3_+_1  |
| Chn1    | -4.981 | -4.981 | -4.963 | -2.001 | -4.875 | -2.879 | -4.981 | -4.981 | -4.981 | -4.981 | 108699    | CHN1        | NM_001113246_2_-_1  |
| Sin3b   | 8.219  | 8.355  | 7.306  | 7.248  | 7.098  | 7.263  | 7.176  | 7.273  | 6.802  | 6.509  | 20467     | SIN3B       | NM_001113248_8_+_1  |
| Fam214a | 4.826  | 5.131  | 1.987  | 2.736  | 2.639  | 3.058  | 2.630  | 3.186  | 3.864  | 2.208  | 235493    | FAM214A     | NM_001113283_9_+_1  |
| Msr1    | -1.540 | -4.981 | -1.393 | -1.916 | -3.606 | -1.862 | 2.413  | 4.335  | 5.924  | 6.533  | 20288     | MSR1        | NM_001113326_8_-_1  |
| Fam131b | -4.981 | -4.870 | -3.629 | -4.209 | -2.065 | -1.888 | -3.148 | -4.052 | -4.981 | -4.981 | 76156     | FAM131B     | NM_001113327_6_-_1  |
| Shc1    | -4.620 | 0.039  | 3.626  | 3.315  | 2.100  | 2.796  | 1.491  | 1.650  | 2.419  | 2.930  | 20416     | SHC1        | NM_001113331_3_+_1  |
| Gatad2a | 3.727  | 3.225  | 3.911  | 4.099  | 4.283  | 4.315  | 4.534  | 4.276  | 5.861  | 5.310  | 234366    | GATAD2A     | NM_001113346_8_-_1  |
| Xkr5    | -2.842 | -4.981 | -2.910 | -1.133 | -1.157 | -3.166 | -0.762 | -3.151 | 1.124  | -2.967 | 319581    | XKR5        | NM_001113350_8_-_1  |
| Synj2   | 0.135  | -1.019 | -1.188 | -1.503 | -3.120 | -2.334 | -0.906 | -0.798 | -1.150 | -1.481 | 20975     | SYNJ2       | NM_001113351_17_+_1 |
| Synj2   | -4.812 | -4.757 | -4.036 | -3.930 | -2.637 | -2.471 | -0.842 | -1.094 | 0.509  | -0.083 | 20975     | SYNJ2       | NM_001113352_17_+_1 |
| Synj2   | -4.828 | -4.981 | -3.662 | -3.624 | -4.603 | -4.838 | -3.621 | -3.410 | 0.569  | 1.269  | 20975     | SYNJ2       | NM_001113353_17_+_1 |
| Phf8    | 4.260  | 4.010  | 4.386  | 4.563  | 4.556  | 4.624  | 4.846  | 4.805  | 5.606  | 5.977  | 320595    | PHF8        | NM_001113354_X_+_1  |
| Vps26a  | -3.241 | -0.582 | -0.948 | -1.038 | -2.981 | -2.898 | -3.772 | -0.670 | -3.850 | 0.311  | 30930     | VPS26A      | NM_001113355_10_-_1 |
| C1rb    | -3.563 | -2.883 | -4.975 | -4.870 | -4.979 | -4.830 | -4.969 | -4.837 | -4.981 | -1.574 | 667277    | C1R         | NM_001113356_6_+_1  |
| Dad1    | 8.830  | 8.985  | 7.600  | 7.456  | 7.505  | 7.901  | 7.905  | 7.825  | 7.243  | 6.844  | 13135     | DAD1        | NM_001113358_14_-_1 |
| Tbc1d14 | -3.494 | -3.010 | -3.670 | -4.188 | -4.452 | -4.807 | -2.548 | -2.690 | -3.496 | -3.913 | 100855    | TBC1D14     | NM_001113362_5_-_1  |
| Tbc1d14 | 3.759  | 3.411  | 1.046  | 1.067  | 1.154  | 1.628  | 1.956  | 2.010  | 2.527  | 1.400  | 100855    | TBC1D14     | NM_001113364_5_-_1  |
| Boll    | -4.981 | -4.981 | -4.735 | -4.848 | -4.901 | -4.967 | -4.936 | -4.961 | -4.981 | -4.981 | 75388     | BOLL        | NM_001113367_1_-_1  |
| Ceacam2 | -2.665 | 4.661  | -4.916 | 0.478  | -3.757 | 1.073  | -3.732 | 5.787  | -2.662 | 8.359  | 26367     | CEACAM1     | NM_001113368_7_-_1  |
| Ceacam2 | -4.981 | -4.981 | -4.896 | -4.952 | -4.708 | -3.795 | -4.216 | -4.800 | -3.468 | -4.510 | 26367     | CEACAM1     | NM_001113369_7_-_1  |
| Mocs2   | 3.335  | 2.200  | 2.692  | 2.303  | 2.542  | 2.244  | 3.004  | 2.621  | 2.503  | 2.733  | 17434     | MOC2        | NM_001113374_13_+_1 |
| Mocs2   | -2.784 | 0.540  | -2.188 | -3.297 | -2.676 | -4.146 | -1.429 | -4.094 | -1.509 | -4.981 | 17434     | MOC2        | NM_001113375_13_+_1 |
| Lrrc32  | -1.549 | -2.997 | 0.806  | -0.332 | -2.710 | -3.504 | -2.509 | -3.651 | -4.981 | -4.981 | 434215    | LRRC32      | NM_001113379_7_+_1  |
| Gls     | 6.162  | 6.255  | 6.456  | 6.308  | 6.250  | 6.337  | 6.080  | 6.018  | 6.105  | 6.669  | 14660     | GLS         | NM_001113383_1_-_1  |
| Mfsd4b5 | -3.090 | -2.162 | -4.281 | -4.523 | -3.342 | -4.280 | -4.238 | -4.239 | -3.322 | -3.853 | 215928    | NA          | NM_001113385_10_-_1 |
| Lifr    | 5.524  | 5.867  | 0.372  | 0.367  | 0.269  | 0.065  | 1.438  | 2.345  | 4.728  | 4.126  | 16880     | LIFR        | NM_001113386_15_+_1 |
| Mfsd4b5 | -3.090 | -2.583 | -4.175 | -4.372 | -4.587 | -3.938 | -2.403 | -1.774 | -1.719 | -1.449 | 215928    | NA          | NM_001113388_10_-_1 |
| Dyrk1a  | 4.528  | 4.549  | 4.225  | 3.961  | 4.323  | 3.980  | 4.379  | 4.238  | 4.399  | 4.572  | 13548     | DYRK1A      | NM_001113389_16_+_1 |
| Cd247   | 0.630  | -2.160 | 0.629  | 1.186  | 0.091  | 3.042  | -0.856 | 3.054  | 0.036  | -1.194 | 12503     | CD247       | NM_001113391_1_+_1  |
| Eaf2    | 3.225  | 3.225  | -1.251 | 0.015  | -3.170 | -0.846 | 1.271  | 4.150  | -2.426 | -2.976 | 106389    | EAF2        | NM_001113401_16_-_1 |
| Eaf2    | -1.668 | -4.981 | -3.946 | -4.888 | -4.977 | -4.981 | -4.924 | -3.970 | -4.981 | -4.981 | 106389    | EAF2        | NM_001113405_16_-_1 |
| Ldb1    | 5.301  | 5.460  | 4.910  | 4.929  | 5.274  | 5.368  | 5.442  | 5.523  | 5.624  | 5.354  | 16825     | LDB1        | NM_001113408_19_-_1 |
| Fggy    | 4.950  | 6.277  | 0.168  | 2.752  | 0.350  | 2.687  | -0.272 | 2.708  | 1.024  | 3.132  | 75578     | FGGY        | NM_001113412_4_+_1  |
| Rnf13   | 7.908  | 8.498  | 5.648  | 5.803  | 6.672  | 6.820  | 6.762  | 6.906  | 6.538  | 7.428  | 24017     | RNF13       | NM_001113413_3_+_1  |
| Epb41l5 | -3.843 | -1.953 | -1.421 | -2.907 | -3.390 | -3.102 | -3.426 | -2.949 | -4.981 | -4.981 | 226352    | EPB41L5     | NM_001113416_1_-_1  |
| Thrb    | -3.229 | -4.981 | -4.450 | -2.949 | -2.944 | -2.994 | -2.728 | -2.351 | -4.981 | -0.915 | 21834     | THRB        | NM_001113417_14_+_1 |
| Gm21949 | -4.981 | -4.981 | -4.981 | -4.978 | -4.979 | -4.979 | -4.981 | -4.981 | -4.981 | -4.981 | 100505386 | IQCJ-SCHIP1 | NM_001113419_3_+_1  |
| Schip1  | -4.981 | -1.721 | -3.768 | -4.100 | -4.957 | -4.616 | -4.811 | -4.967 | -2.112 | -3.022 | 30953     | SCHIP1      | NM_001113420_3_+_1  |
| Schip1  | -4.981 | -4.981 | -4.979 | -4.949 | -4.975 | -4.975 | -4.980 | -4.980 | -4.981 | -4.981 | 30953     | SCHIP1      | NM_001113421_3_+_1  |
| Slain2  | 3.602  | 3.636  | 4.009  | 4.292  | 4.547  | 4.476  | 4.441  | 4.288  | 4.889  | 5.262  | 75991     | SLAIN2      | NM_001113423_5_+_1  |
| Amn1    | 4.376  | 4.277  | 3.493  | 3.268  | 3.464  | 3.421  | 3.227  | 2.912  | 2.687  | 2.486  | 232566    | AMN1        | NM_001113424_6_-_1  |
| Tec     | 2.980  | 3.873  | 2.426  | 2.865  | 4.681  | 3.534  | 4.479  | 4.226  | 4.530  | 5.112  | 21682     | TEC         | NM_001113460_5_-_1  |
| Tec     | 2.571  | -2.566 | 0.320  | -4.643 | 2.620  | -4.670 | 2.763  | -4.600 | 4.041  | -4.742 | 21682     | TEC         | NM_001113461_5_-_1  |
| Tec     | 1.289  | 0.166  | -1.246 | 0.800  | -0.246 | -1.190 | 0.680  | 0.201  | 2.945  | 1.738  | 21682     | TEC         | NM_001113464_5_-_1  |
| Vmn2r29 | -4.783 | -4.981 | -4.839 | -4.973 | -3.168 | -4.787 | -3.831 | -4.532 | -4.981 | -4.981 | 76229     | NA          | NM_001113468_7_-_1  |
| Ctdsp2  | 3.430  | 3.228  | 5.253  | 4.478  | 4.104  | 3.430  | 4.318  | 4.016  | 5.773  | 5.437  | 52468     | CTDSP2      | NM_001113470_10_+_1 |
| Lair1   | 9.513  | 9.643  | 3.363  | 3.450  | 6.757  | 6.888  | 6.626  | 6.383  | 5.568  | 5.990  | 52855     | LAIR1       | NM_001113474_7_-_1  |
| Frrs1   | -1.713 | -1.018 | -1.416 | -1.548 | -2.275 | -2.129 | -2.255 | -0.104 | 0.571  | -0.674 | 20321     | FRRS1       | NM_001113478_3_+_1  |
| Sept9   | 0.267  | -2.101 | 2.575  | 3.865  | 3.757  | 0.399  | 3.971  | 3.455  | 0.685  | 1.072  | 53860     | SEPT9       | NM_001113486_11_+_1 |
| Sept9   | -4.501 | -4.428 | -1.118 | -0.281 | -2.219 | -1.953 | -3.213 | -3.579 | -4.350 | -4.694 | 53860     | SEPT9       | NM_001113487_11_+_1 |
| Sept9   | 5.513  | 5.435  | 4.532  | 4.886  | 4.707  | 4.768  | 5.649  | 5.717  | 7.530  | 7.113  | 53860     | SEPT9       | NM_001113488_11_+_1 |
| Itga9   | -0.434 | -1.220 | -2.984 | -3.033 | -2.775 | -2.800 | -2.404 | -2.173 | -1.109 | -4.981 | 104099    | ITGA9       | NM_001113514_9_+_1  |
| Col2a1  | -4.981 | -4.981 | -4.248 | -4.953 | -4.259 | -4.677 | -4.954 | -4.539 | -3.627 | -4.981 | 12824     | COL2A1      | NM_001113515_15_-_1 |
| Arhgef7 | -1.955 | -1.432 | 0.315  | -0.232 | -0.073 | -1.034 | -2.482 | -1.181 | -1.504 | -0.640 | 54126     | ARHGEF7     | NM_001113517_8_+_1  |
| Arhgef7 | -3.827 | -3.491 | -1.610 | -0.718 | -4.466 | -3.328 | -4.098 | -2.772 | -2.540 | -1.471 | 54126     | ARHGEF7     | NM_001113518_8_+_1  |
| Isg20   | 2.910  | 3.119  | -0.115 | 3.775  | 1.617  | 4.533  | 1.412  | 3.805  | 1.530  | 0.979  | 57444     | ISG20       | NM_001113527_7_+_1  |
| Csf1    | 0.730  | 0.176  | -0.634 | -0.952 | -1.669 | -1.301 | 1.910  | 0.763  | -3.204 | -1.331 | 12977     | CSF1        | NM_001113529_3_-_1  |

|                |        |        |        |        |        |        |        |        |        |        |               |          |                    |
|----------------|--------|--------|--------|--------|--------|--------|--------|--------|--------|--------|---------------|----------|--------------------|
| Csf1           | -3.497 | -0.836 | -2.621 | -2.526 | -3.849 | -4.533 | -0.690 | -4.473 | -3.173 | -4.965 | 12977         | CSF1     | NM_001113530_3_-1  |
| Wtap           | 5.513  | 2.622  | 5.636  | 2.842  | 5.405  | 1.125  | 5.485  | 2.091  | 5.243  | -2.820 | 60532         | WTAP     | NM_001113532_17_-1 |
| Wtap           | 5.064  | 6.380  | 3.410  | 5.905  | 3.288  | 5.718  | 3.295  | 5.716  | 2.496  | 6.181  | 60532         | WTAP     | NM_001113533_17_-1 |
| Lima1          | -0.847 | 0.187  | 3.214  | 2.716  | 0.525  | -0.285 | -0.251 | 0.145  | -0.829 | -4.617 | 65970         | LIMA1    | NM_001113545_15_-1 |
| Ltbp4          | -2.329 | -4.981 | -4.446 | -4.963 | -3.623 | -4.888 | -4.499 | -4.022 | -4.981 | -4.981 | 108075        | LTBP4    | NM_001113549_7_-1  |
| 4833420G17Rik  | 5.169  | 5.494  | 5.388  | 5.286  | 5.234  | 5.285  | 5.431  | 5.495  | 5.411  | 5.769  | 67392         | C5orf34  | NM_001113550_13_+1 |
| Irak2          | 0.119  | 0.653  | -0.711 | -0.842 | -1.848 | -1.068 | -0.513 | -1.672 | 0.468  | -0.039 | 108960        | IRAK2    | NM_001113553_6_+1  |
| Nudcd1         | 2.763  | 2.801  | 2.934  | 2.853  | 2.930  | 2.874  | 2.529  | 2.379  | 1.639  | 1.586  | 67429         | NUDCD1   | NM_001113554_15_-1 |
| A530064D06Rik  | 4.858  | 6.216  | -0.934 | 3.626  | 0.873  | 2.757  | 1.105  | 3.454  | 3.207  | 4.637  | 328830        | NA       | NM_001113556_17_-1 |
| Sox5           | -4.981 | -4.981 | -4.981 | -4.981 | -4.981 | -4.935 | -4.746 | -4.720 | -4.981 | -4.981 | 20678         | SOX5     | NM_001113559_6_-1  |
| Glo1           | 2.666  | -4.981 | 3.084  | -4.192 | 2.991  | -2.879 | 2.437  | -4.533 | 2.281  | -4.981 | 109801        | GLO1     | NM_001113560_17_-1 |
| Cutc           | 4.836  | 4.456  | 4.577  | 4.245  | 4.685  | 4.193  | 4.474  | 4.019  | 4.054  | 3.496  | 66388         | CUTC     | NM_001113562_19_+1 |
| Stat5b         | 4.803  | 4.397  | 5.117  | 5.006  | 5.701  | 5.521  | 5.697  | 5.749  | 7.101  | 7.010  | 20851         | STAT5B   | NM_001113563_11_-1 |
| Serbp1         | 5.259  | 4.858  | 4.555  | 4.775  | 4.820  | 4.854  | 4.544  | 4.624  | 3.701  | 3.979  | 66870         | SERBP1   | NM_001113564_6_+1  |
| Serbp1         | 6.723  | 6.668  | 6.483  | 6.590  | 6.492  | 6.500  | 6.548  | 6.471  | 6.088  | 6.027  | 66870         | SERBP1   | NM_001113565_6_+1  |
| Serbp1         | 5.904  | 6.034  | 5.755  | 5.877  | 5.853  | 5.917  | 5.721  | 5.834  | 5.215  | 5.316  | 66870         | SERBP1   | NM_001113566_6_+1  |
| Stxbp1         | 0.384  | 0.105  | -4.406 | -4.585 | -4.658 | -4.869 | -4.163 | -4.786 | -4.406 | -4.608 | 20910         | STXBP1   | NM_001113569_2_-1  |
| Brd3           | 5.583  | 5.871  | 5.010  | 4.940  | 5.267  | 5.227  | 5.438  | 5.080  | 5.381  | 5.172  | 67382         | BRD3     | NM_001113573_2_-1  |
| Brd3           | 2.914  | 2.198  | 0.836  | 0.547  | 1.086  | 0.618  | 1.899  | 1.548  | 2.629  | 1.765  | 67382         | BRD3     | NM_001113574_2_-1  |
| Mageb16        | -4.981 | -4.981 | -4.925 | -4.361 | -4.933 | -3.321 | -4.981 | -4.981 | -4.981 | -4.981 | 71967         | MAGEB16  | NM_001113734_X_-1  |
| Pabpc1l        | -3.668 | -1.499 | -3.029 | -1.881 | -3.947 | -3.739 | -3.878 | -4.584 | 0.855  | 0.282  | 381404        | PABPC1L  | NM_001114079_2_+1  |
| Nde1           | 1.475  | 1.282  | 1.275  | 0.827  | 1.408  | 0.469  | 1.094  | 0.735  | 0.377  | 1.138  | 67203         | NDE1     | NM_001114085_16_+1 |
| Pdlim7         | -4.917 | -4.981 | 2.075  | 1.983  | -0.982 | 0.113  | -1.192 | 0.139  | 0.646  | 0.261  | 67399         | PDLM7    | NM_001114087_13_-1 |
| Pdlim7         | -1.805 | -2.060 | 3.828  | 3.850  | 0.137  | 1.593  | 1.212  | 1.549  | 2.288  | 2.368  | 67399         | PDLM7    | NM_001114088_13_-1 |
| Smarcc2        | 0.154  | 1.395  | 0.697  | 1.626  | 0.994  | 0.284  | 0.762  | -0.433 | 2.009  | 2.408  | 68094         | SMARCC2  | NM_001114096_10_+1 |
| Smarcc2        | 4.253  | 3.954  | 5.341  | 5.394  | 5.307  | 5.295  | 5.244  | 5.492  | 6.330  | 6.342  | 68094         | SMARCC2  | NM_001114097_10_+1 |
| Syt3           | -4.981 | -2.494 | -1.142 | -0.869 | -3.494 | -3.068 | -4.411 | -1.030 | -0.302 | 0.096  | 20981         | SYT3     | NM_001114116_7_+1  |
| Qrich1         | 3.902  | 3.082  | 3.254  | 3.318  | 3.168  | 3.370  | 2.882  | 3.282  | 4.349  | 4.459  | 69232         | QRICH1   | NM_001114119_9_+1  |
| Dab2ip         | -4.590 | -4.869 | -0.906 | 0.219  | 3.952  | 4.207  | 2.922  | 2.030  | -1.613 | -0.359 | 69601         | DAB2IP   | NM_001114124_2_+1  |
| Dab2ip         | -1.832 | -0.161 | -4.937 | -2.951 | -3.354 | -2.648 | -3.594 | -4.924 | -4.981 | -2.470 | 69601         | DAB2IP   | NM_001114125_2_+1  |
| Ppp4r1         | 2.636  | 2.865  | 4.258  | 3.674  | 3.602  | 3.400  | 3.943  | 4.512  | 6.080  | 5.795  | 70351         | PPP4R1   | NM_001114131_17_+1 |
| Tcf20          | -2.108 | 0.497  | -3.413 | -1.898 | 0.083  | -0.448 | -2.462 | -4.417 | -3.542 | -0.881 | 21411         | TCF20    | NM_001114140_15_-1 |
| Fam189a2       | -3.189 | -1.363 | -4.966 | -4.665 | -4.981 | -4.981 | -3.646 | -3.791 | -1.180 | -3.142 | 381217        | FAM189A2 | NM_001114174_19_-1 |
| Slc25a53       | 6.192  | 5.934  | -1.742 | -2.522 | 0.231  | 0.628  | -1.893 | -0.248 | -4.981 | -4.981 | 67062         | SLC25A53 | NM_001114179_X_-1  |
| Stox2          | 0.338  | 0.844  | -4.766 | -4.879 | -4.971 | -4.980 | -4.801 | -1.642 | -0.728 | -2.620 | 71069         | STOX2    | NM_001114311_8_-1  |
| Shtn1          | 0.652  | 1.370  | 7.180  | 7.396  | 5.306  | 5.000  | 5.199  | 5.368  | 2.596  | 5.330  | 71653         | SHTN1    | NM_001114312_19_-1 |
| Cdhr5          | 0.278  | 0.198  | -4.949 | -4.429 | -4.960 | -4.960 | -4.760 | -4.846 | -4.981 | -4.981 | 72040         | CDHR5    | NM_001114322_7_-1  |
| Ccpg1          | 6.890  | 6.992  | 5.963  | 5.657  | 5.743  | 6.218  | 6.226  | 6.165  | 6.970  | 6.998  | 72278         | CCPG1    | NM_001114328_9_+1  |
| Slc16a10       | 1.708  | 2.192  | -0.368 | 0.691  | -0.405 | 1.152  | 2.807  | 3.137  | 4.339  | 4.877  | 72472         | SLC16A10 | NM_001114332_10_-1 |
| Grm1           | -4.981 | -4.981 | -2.879 | -4.822 | -4.596 | -3.873 | -3.611 | -4.921 | -4.981 | -4.981 | 14816         | GRM1     | NM_001114333_10_-1 |
| Rps6kb1        | 5.841  | 5.945  | 5.526  | 5.399  | 5.605  | 5.422  | 5.351  | 5.310  | 5.214  | 5.193  | 72508         | RPS6KB1  | NM_001114334_11_-1 |
| Pank1          | 3.798  | 3.860  | 3.874  | 3.690  | 2.434  | 2.452  | 2.430  | 2.699  | 2.026  | 2.258  | 57535         | PANK1    | NM_001114339_19_-1 |
| Clasp2         | 1.749  | 1.878  | 3.941  | 4.089  | 4.347  | 4.580  | 3.709  | 4.393  | 4.228  | 4.962  | 76499         | CLASP2   | NM_001114347_9_+1  |
| Eml4           | 5.617  | 5.428  | 5.352  | 4.841  | 5.972  | 5.508  | 5.736  | 5.258  | 5.301  | 4.806  | 78798         | EML4     | NM_001114361_17_+1 |
| Eml4           | -1.980 | 0.213  | -2.689 | -2.443 | 0.978  | -0.062 | 0.671  | 0.356  | 1.487  | 0.833  | 78798         | EML4     | NM_001114362_17_+1 |
| Nedd4l         | 3.912  | 2.864  | 4.703  | 4.563  | 3.985  | 3.814  | 3.950  | 4.117  | 4.221  | 4.477  | 83814         | NEDD4L   | NM_001114386_18_+1 |
| Zmym4          | 3.798  | 3.843  | 4.106  | 3.655  | 4.456  | 4.126  | 4.276  | 3.586  | 3.492  | 3.536  | 67785         | ZMYM4    | NM_001114399_4_-1  |
| Pced1a         | 0.829  | 1.733  | 1.541  | 1.781  | 1.712  | 2.171  | 1.887  | 2.516  | 2.876  | 2.903  | 319513        | PCED1A   | NM_001114541_2_-1  |
| Record_removed | -1.495 | -0.844 | -3.693 | -4.189 | -2.744 | -4.143 | -2.488 | -3.490 | -3.242 | -4.316 | Record_remove | NA       | NM_001114545_5_+1  |
| Ehbp1l1        | 5.348  | 5.675  | 6.893  | 6.762  | 6.644  | 6.655  | 6.783  | 6.622  | 7.467  | 7.169  | 114601        | NA       | NM_001114595_19_-1 |
| Ehbp1l1        | -3.554 | -2.674 | -1.104 | 1.112  | -1.731 | -2.843 | -2.496 | -1.101 | -0.394 | 0.993  | 114601        | NA       | NM_001114596_19_-1 |
| Ehbp1l1        | 0.887  | 1.933  | 3.678  | 3.435  | 3.408  | 3.219  | 3.514  | 3.398  | 5.722  | 5.475  | 114601        | NA       | NM_001114597_19_-1 |
| Ino80d         | 3.553  | 3.748  | 4.187  | 4.130  | 4.405  | 4.265  | 4.324  | 4.013  | 3.802  | 3.826  | 227195        | INO80D   | NM_001114609_1_-1  |
| Jmjd7          | 3.886  | 3.788  | 2.636  | 3.578  | 3.117  | 3.057  | 3.118  | 2.832  | 2.699  | 2.193  | 433466        | JMJD7    | NM_001114637_2_+1  |
| Scfd2          | 3.711  | 4.013  | 3.553  | 3.119  | 2.956  | 2.890  | 2.766  | 3.182  | 3.933  | 3.361  | 212986        | SCFD2    | NM_001114660_5_-1  |
| Mfsd4a         | -4.981 | -4.981 | -2.639 | -1.695 | -4.041 | -4.832 | -4.932 | -3.340 | -4.981 | -4.981 | 213006        | MFSD4A   | NM_001114662_1_-1  |
| Plcl1          | 0.079  | -0.548 | 1.178  | 1.157  | 0.975  | 1.553  | 2.614  | 2.941  | 2.084  | 3.560  | 227120        | PLCL1    | NM_001114663_1_+1  |
| Iqsec2         | -4.830 | -0.454 | -2.933 | -3.081 | -3.321 | -3.401 | -4.810 | -3.032 | -2.693 | -4.967 | 245666        | IQSEC2   | NM_001114664_X_+1  |
| Fnbp1l         | -4.981 | -4.981 | -4.438 | -4.722 | -4.625 | -4.856 | -4.153 | -2.286 | -4.607 | -1.812 | 214459        | NA       | NM_001114665_3_-1  |
| 9930111J21Rik1 | 4.107  | 4.368  | 5.962  | 5.482  | 6.847  | 5.922  | 6.357  | 6.325  | 7.459  | 7.429  | 667214        | NA       | NM_001114679_11_-1 |
| Fam208a        | 2.152  | 0.952  | 2.212  | 2.182  | 2.077  | 2.473  | -1.524 | 0.309  | -1.144 | 2.118  | 218850        | FAM208A  | NM_001114879_14_+1 |
| U2surp         | 6.279  | 6.413  | 6.353  | 6.428  | 6.727  | 6.807  | 6.739  | 6.602  | 5.896  | 5.983  | 67958         | U2SURP   | NM_001114977_9_-1  |
| Lin54          | 3.342  | 3.211  | 2.275  | 1.910  | 2.930  | 2.255  | 1.466  | 2.303  | 2.810  | 0.321  | 231506        | LIN54    | NM_001115010_5_-1  |
| Kmt5c          | 3.279  | 4.172  | 3.873  | 4.181  | 4.119  | 3.565  | 4.345  | 3.860  | 4.351  | 4.807  | 232811        | KMT5C    | NM_001115018_7_+1  |
| H2-M5          | -4.981 | -4.981 | 1.104  | 0.451  | -1.282 | -1.243 | -3.945 | -2.946 | -4.981 | -3.758 | 240095        | NA       | NM_001115075_17_-1 |
| Tssc4          | 4.055  | 3.588  | 3.766  | 3.840  | 3.278  | 3.187  | 3.576  | 3.655  | 2.994  | 3.033  | 56844         | TSSC4    | NM_001115085_7_+1  |
| Fancf          | 2.519  | 2.656  | 1.552  | 2.003  | 2.338  | 2.448  | 2.377  | 2.219  | 2.038  | 2.175  | 100040608     | FANCF    | NM_001115087_7_-1  |
| Zbtb44         | 3.891  | 4.116  | 4.895  | 4.784  | 4.409  | 4.108  | 4.942  | 4.654  | 5.218  | 5.700  | 235132        | ZBTB44   | NM_001115130_9_+1  |
| Ncaph2         | 6.518  | 6.296  | 6.803  | 6.745  | 6.270  | 6.267  | 6.261  | 6.095  | 5.830  | 5.644  | 52683         | NCAPH2   | NM_001115132_15_+1 |
| Uspl1          | 1.955  | 1.599  | 1.404  | 1.992  | 2.202  | 1.569  | 1.726  | 0.948  | 1.739  | 2.158  | 231915        | USPL1    | NM_001115149_5_+1  |
| Uspl1          | 3.448  | 2.883  | 1.593  | 2.956  | 0.682  | 1.743  | 1.270  | 2.279  | 3.250  | 3.563  | 231915        | USPL1    | NM_001115150_5_+1  |
| Uspl1          | 3.250  | 3.554  | 2.862  | 2.716  | 1.757  | 2.816  | 2.658  | 2.129  | 2.543  | 2.468  | 231915        | USPL1    | NM_001115151_5_+1  |
| Uspl1          | 1.696  | 1.356  | 2.224  | 1.297  | 2.903  | 1.940  | 1.783  | -0.301 | 0.474  | 1.411  | 231915        | USPL1    | NM_001115153_5_+1  |
| Samd3          | -2.164 | -4.981 | -4.176 | -4.098 | -4.974 | -3.226 | -2.175 | -3.975 | -2.957 | -4.981 | 268288        | SAMD3    | NM_001115154_10_+1 |

|               |        |        |        |        |        |        |        |        |        |        |           |          |                          |
|---------------|--------|--------|--------|--------|--------|--------|--------|--------|--------|--------|-----------|----------|--------------------------|
| Phlpp2        | 4.434  | 4.790  | 1.864  | 1.508  | 2.286  | 2.519  | 1.764  | 1.755  | 1.412  | 1.970  | 244650    | PHLPP2   | NM_001122594_8_+_1       |
| A630033H20Rik | 0.363  | 2.706  | 1.225  | 0.775  | 0.851  | 0.887  | 0.457  | 1.389  | 2.981  | 3.661  | 213438    | NA       | NM_001122595_X_+_1       |
| A630033H20Rik | -4.072 | 0.321  | -4.021 | -4.747 | -1.769 | -1.254 | -1.769 | 2.973  | 3.980  | 4.411  | 213438    | NA       | NM_001122596_X_+_1       |
| Dazap1        | 1.600  | 2.351  | 0.886  | 1.937  | 1.621  | 1.661  | 1.236  | 0.050  | 1.348  | 1.451  | 70248     | NA       | NM_001122604_10_+_1      |
| Dazap1        | -4.498 | 1.001  | 0.582  | 0.440  | 0.975  | -2.199 | 0.618  | -0.544 | 1.175  | 0.144  | 70248     | NA       | NM_001122605_10_+_1      |
| Galnt9        | -4.981 | -4.981 | -4.855 | -1.394 | -2.689 | -2.549 | 2.958  | 4.490  | 6.112  | 6.648  | 231605    | GALNT9   | NM_001122639_5_+_1       |
| Arhgap17      | 3.483  | 3.791  | 3.212  | 2.893  | 2.071  | 2.100  | 2.690  | 3.013  | 4.257  | 4.343  | 70497     | ARHGAP17 | NM_001122640_7_+_1       |
| Arhgap17      | 6.100  | 6.541  | 5.364  | 5.317  | 4.770  | 5.074  | 5.158  | 5.487  | 6.193  | 6.704  | 70497     | ARHGAP17 | NM_001122641_7_+_1       |
| Arhgap17      | 6.527  | 6.733  | 5.815  | 5.965  | 5.253  | 5.758  | 5.197  | 5.747  | 6.013  | 6.360  | 70497     | ARHGAP17 | NM_001122642_7_+_1       |
| Arhgap17      | 3.074  | 2.863  | 1.099  | 1.574  | 0.317  | 0.196  | 0.345  | -0.192 | 2.014  | 3.262  | 70497     | ARHGAP17 | NM_001122643_7_+_1       |
| Suds3         | 2.102  | 3.906  | 1.646  | 3.410  | 1.366  | 3.766  | 2.289  | 3.632  | 1.285  | 4.001  | 71954     | SUDS3    | NM_001122666_5_+_1       |
| Mkl2          | 2.999  | 2.818  | 3.793  | 3.709  | 3.581  | 3.654  | 3.495  | 3.493  | 2.433  | 2.849  | 239719    | MKL2     | NM_001122667_16_+_1      |
| Zcchc2        | 0.463  | 0.903  | 1.639  | 1.553  | 2.307  | 0.355  | 2.384  | 1.081  | 3.780  | 3.613  | 227449    | ZCCHC2   | NM_001122675_1_+_1       |
| Zcchc2        | 3.507  | 3.594  | 3.301  | 3.141  | 4.357  | 3.824  | 4.431  | 3.934  | 4.473  | 4.275  | 227449    | ZCCHC2   | NM_001122676_1_+_1       |
| Nectin4       | 3.145  | 2.781  | 0.800  | -0.050 | 1.524  | 1.830  | 1.845  | 1.116  | 2.963  | 1.908  | 71740     | NECTIN4  | NM_001122680_1_+_1       |
| Bdh1          | 1.830  | 2.376  | 2.529  | 3.038  | 1.183  | 1.851  | 0.122  | 1.573  | -2.305 | -1.489 | 71911     | BDH1     | NM_001122683_16_+_1      |
| Rhbdd1        | -4.081 | -3.818 | -3.026 | -4.652 | -4.813 | -4.924 | -4.444 | -4.843 | -4.282 | -4.491 | 76867     | RHBDD1   | NM_001122685_1_+_1       |
| Tnrc18        | 1.552  | 1.595  | 3.460  | 3.419  | 3.877  | 3.750  | 3.664  | 3.625  | 4.148  | 4.379  | 231861    | TNRC18   | NM_001122730_5_+_1       |
| Kit           | 1.355  | -0.337 | 5.556  | 5.381  | 6.371  | 6.288  | 5.081  | 4.564  | 0.781  | -1.795 | 16590     | KIT      | NM_001122733_5_+_1       |
| Igf2          | -3.800 | -4.981 | -4.968 | -4.968 | -4.904 | -1.836 | -4.966 | -4.952 | -4.981 | -4.981 | 16002     | IGF2     | NM_001122736_7_+_1       |
| Igf2          | -3.345 | -4.981 | -4.962 | -4.962 | -4.925 | -3.239 | -4.962 | -4.944 | -4.981 | -4.981 | 16002     | IGF2     | NM_001122737_7_+_1       |
| Kansl1l       | 3.546  | 3.609  | 1.169  | 1.472  | 1.781  | 0.896  | 0.969  | 1.058  | 0.772  | 1.738  | 68691     | KANSL1L  | NM_001122738_1_+_1       |
| Inpp1l        | 2.872  | 3.869  | 1.694  | 3.369  | 1.875  | 3.290  | 2.117  | 3.425  | 3.545  | 4.614  | 16332     | INPPL1   | NM_001122739_7_+_1       |
| Txk           | -1.408 | -4.981 | -2.109 | -1.101 | -0.108 | 0.124  | -3.285 | 1.092  | -1.762 | -2.094 | 22165     | TXK      | NM_001122754_5_+_1       |
| Corin         | -4.981 | -2.997 | -2.099 | -2.841 | -4.716 | -3.047 | -2.052 | -2.353 | -1.308 | -1.092 | 53419     | CORIN    | NM_001122756_5_+_1       |
| Pcdh7         | -4.981 | -4.981 | -3.577 | -4.932 | -4.981 | -4.981 | -4.968 | -4.734 | -4.981 | -4.981 | 54216     | PCDH7    | NM_001122758_5_+_1       |
| Pde7a         | 5.744  | 5.800  | 4.675  | 4.670  | 5.327  | 5.108  | 4.573  | 4.809  | 3.935  | 3.366  | 18583     | PDE7A    | NM_001122759_3_+_1       |
| Sirt2         | 5.060  | 5.305  | 5.094  | 5.235  | 4.867  | 4.547  | 4.856  | 5.043  | 5.841  | 5.826  | 64383     | SIRT2    | NM_001122765_7_+_1       |
| Sirt2         | 0.973  | -2.522 | 2.441  | 1.922  | 1.469  | 1.248  | -0.474 | -1.741 | 1.336  | 0.256  | 64383     | SIRT2    | NM_001122766_7_+_1       |
| 2310022A10Rik | -0.215 | -0.863 | -1.798 | -2.763 | -0.350 | -0.481 | 0.380  | -1.437 | 0.603  | 1.158  | 66367     | C19orf47 | NM_001122767_7_+_1       |
| Lrrc8d        | 3.247  | 3.522  | 3.530  | 3.899  | 3.860  | 3.935  | 4.363  | 4.542  | 6.807  | 6.398  | 231549    | LRRC8D   | NM_001122768_5_+_1       |
| Klh125        | 2.694  | 3.147  | 1.395  | 1.363  | 2.027  | 2.245  | 2.341  | 2.435  | 3.809  | 3.591  | 207952    | KLHL25   | NM_001122780_7_+_1       |
| Pnpla6        | 3.206  | 3.509  | 3.269  | 2.998  | 3.371  | 3.484  | 3.360  | 2.878  | 2.842  | 2.940  | 50767     | PNPLA6   | NM_001122818_8_+_1       |
| Ap3m2         | 1.702  | -2.134 | -0.776 | -1.992 | 0.864  | -1.885 | 0.156  | -1.926 | 1.177  | -2.178 | 64933     | AP3M2    | NM_001122820_8_+_1       |
| Wrn           | 0.795  | 0.059  | 1.092  | -0.966 | 0.693  | -0.408 | -0.347 | -1.180 | 1.810  | 1.082  | 22427     | WRN      | NM_001122822_8_+_1       |
| Upf1          | 2.163  | 0.229  | 0.833  | 2.964  | 2.118  | 1.362  | 2.578  | 1.628  | 3.375  | 3.926  | 19704     | UPF1     | NM_001122829_8_+_1       |
| Klh126        | 1.418  | 1.935  | 2.485  | 1.751  | 1.645  | 2.080  | 2.304  | 1.095  | 2.697  | 2.239  | 234378    | KLHL26   | NM_001122830_8_+_1       |
| Eps15l1       | 3.405  | 3.379  | 4.119  | 4.230  | 4.198  | 3.964  | 3.875  | 3.948  | 4.010  | 4.699  | 13859     | EPS15L1  | NM_001122832_8_+_1       |
| Tnpo2         | 0.495  | 1.024  | 2.283  | 1.840  | 0.404  | 0.813  | 1.029  | 1.270  | 0.375  | 1.278  | 212999    | TNPO2    | NM_001122843_8_+_1       |
| Pard3         | -4.981 | -4.981 | -4.981 | -4.981 | -4.981 | -4.981 | -4.981 | -4.981 | -4.981 | -4.981 | 93742     | PARD3    | NM_001122850_8_+_1       |
| Faim          | 0.732  | 1.883  | -0.131 | -0.724 | -0.024 | -0.711 | -0.772 | -0.398 | -0.159 | -0.275 | 23873     | FAIM     | NM_001122851_9_+_1       |
| Ubl7          | 5.439  | 5.315  | 4.185  | 3.980  | 4.252  | 4.028  | 4.207  | 4.290  | 5.005  | 4.731  | 69459     | UBL7     | NM_001122873_9_+_1       |
| Epha7         | -4.981 | -4.981 | -4.929 | -4.209 | -4.900 | -4.976 | -3.886 | -4.975 | -2.998 | -3.124 | 13841     | EPHA7    | NM_001122889_4_+_1       |
| Fyn           | 4.016  | 3.831  | 0.816  | 1.405  | 0.398  | -0.387 | -0.189 | 0.581  | 0.812  | -0.023 | 14360     | FYN      | NM_001122892_10_+_1      |
| Fyn           | 5.719  | 5.628  | 1.974  | 0.460  | 1.631  | 0.565  | 2.540  | 1.873  | 1.165  | 1.024  | 14360     | FYN      | NM_001122893_10_+_1      |
| Nab2          | -2.062 | -1.347 | 1.804  | 1.335  | 0.110  | 0.478  | 1.487  | 0.680  | 1.245  | 1.446  | 17937     | NAB2     | NM_001122952_4_+_1       |
| Hp1bp3        | 2.362  | 1.164  | 2.155  | 1.665  | 1.519  | 1.672  | 1.642  | 1.210  | 2.492  | 1.594  | 15441     | HP1BP3   | NM_001122896_4_+_1       |
| Hp1bp3        | 4.105  | 4.623  | 3.766  | 4.240  | 3.691  | 3.206  | 3.430  | 3.533  | 4.039  | 3.629  | 15441     | HP1BP3   | NM_001122897_4_+_1       |
| Lepr          | -1.203 | -1.948 | -1.558 | -1.528 | -1.348 | -0.501 | -1.099 | -1.744 | -0.790 | -0.833 | 16847     | LEPR     | NM_001122899_4_+_1       |
| Tfap2a        | -4.859 | -4.726 | -4.931 | -4.951 | -4.953 | -4.938 | -4.927 | -4.971 | -4.955 | -4.951 | 21418     | TFAP2A   | NM_001122948_13_+_1      |
| Mpl           | -4.890 | -4.764 | -4.482 | -4.946 | -4.977 | -4.977 | -4.897 | -4.816 | -1.355 | -4.768 | 17480     | MPL      | NM_001122949_4_+_1       |
| Hoxa10        | -4.981 | -4.981 | -4.953 | -4.358 | -4.227 | -3.568 | -4.980 | -4.719 | -4.981 | -4.981 | 15395     | HOXA10   | NM_001122950_6_+_1       |
| Nfia          | 1.012  | 0.496  | -0.650 | -1.177 | 0.101  | -2.061 | 0.171  | -1.654 | -0.139 | 1.200  | 18027     | NFIA     | NM_001122952_4_+_1       |
| Nfia          | -4.482 | -4.336 | -3.880 | -2.674 | -4.679 | -1.999 | -3.311 | -4.809 | -3.368 | -1.681 | 18027     | NFIA     | NM_001122953_4_+_1       |
| Pla2g5        | -4.981 | -4.981 | -4.839 | -4.582 | -4.981 | -4.981 | -4.981 | -4.981 | -4.981 | -4.981 | 18784     | PLA2G5   | NM_001122954_4_+_1       |
| Rad54l        | -3.198 | -2.123 | 2.323  | 2.206  | 2.515  | 1.990  | 1.327  | 1.776  | 1.571  | -0.114 | 19366     | RAD54L   | NM_001122958_4_+_1       |
| Rad54l        | -2.207 | -0.672 | -0.284 | -0.046 | 0.745  | 0.519  | 0.038  | 0.327  | -3.902 | -4.853 | 19366     | RAD54L   | NM_001122959_4_+_1       |
| Ccdc53        | 4.140  | 3.541  | 3.796  | 3.560  | 3.089  | 3.043  | 3.371  | 3.127  | 2.989  | 2.790  | 67282     | CCDC53   | NM_001122960_10_+_1      |
| Gpbbp1        | 3.602  | 4.169  | 5.949  | 6.012  | 5.103  | 5.104  | 5.407  | 5.431  | 5.648  | 5.943  | 73274     | GPBP1    | NM_001122963_13_+_1      |
| Casp8ap2      | 4.870  | 4.696  | 4.717  | 4.695  | 5.252  | 5.130  | 4.886  | 4.812  | 4.410  | 4.673  | 26885     | CASP8AP2 | NM_001122978_4_+_1       |
| Ccnc          | 2.665  | 3.384  | 3.238  | 3.037  | 2.735  | 2.684  | 3.141  | 2.725  | 2.998  | 3.624  | 51813     | CCNC     | NM_001122982_4_+_1       |
| Cdc14b        | 6.041  | 6.466  | -0.444 | 1.870  | 0.719  | 0.043  | 1.284  | 1.171  | 2.703  | 3.183  | 218294    | CDC14B   | NM_001122989_13_+_1      |
| Gmeb1         | 1.522  | 0.561  | 0.362  | -0.044 | 0.508  | 0.974  | 1.021  | -0.124 | 0.369  | 1.296  | 56809     | GMEB1    | NM_001122992_4_+_1       |
| B3galt5       | -4.270 | -0.988 | -4.979 | -4.981 | -4.981 | -4.981 | -4.980 | -4.971 | -4.981 | -4.981 | 93961     | B3GALT5  | NM_001122993_16_+_1      |
| Dnmt3b        | -0.825 | -1.314 | 0.083  | -0.506 | 0.408  | -0.347 | 0.659  | -1.946 | 0.605  | 0.191  | 13436     | DNMT3B   | NM_001122997_2_+_1       |
| Tiam2         | -4.981 | -4.981 | -1.669 | -4.948 | -2.154 | -4.925 | 0.576  | -2.680 | 2.896  | -1.560 | 24001     | TIAM2    | NM_001122998_17_+_1      |
| Eif4a2        | 6.500  | 6.398  | 5.526  | 5.396  | 5.545  | 5.503  | 5.846  | 5.618  | 5.092  | 5.442  | 13682     | EIF4A2   | NM_001123037_16_+_1      |
| Eif4a2        | 6.887  | 6.829  | 6.852  | 6.775  | 6.766  | 6.862  | 6.840  | 6.840  | 7.126  | 7.369  | 13682     | EIF4A2   | NM_001123038_16_+_1      |
| Qser1         | 1.491  | 1.540  | 3.318  | 2.905  | 2.044  | 0.657  | 2.489  | 2.391  | 3.111  | 3.380  | 99003     | QSER1    | NM_001123327_2_+_1       |
| Gm3448        | -1.196 | -4.981 | -3.971 | -4.625 | -2.798 | -4.927 | -2.693 | -4.693 | -4.559 | -4.583 | 100041639 | TCTE3    | NM_001123367_17_+_1      |
| Gm3448        | -2.765 | -4.981 | -1.715 | -4.453 | -2.771 | -4.598 | -2.571 | -4.720 | -2.494 | -3.796 | 100041639 | TCTE3    | NM_001123367_dup1_17_+_2 |
| Gm3448        | -3.938 | -4.981 | -4.119 | -4.670 | -4.965 | -4.854 | -4.752 | -4.825 | -4.452 | -4.361 | 100041639 | TCTE3    | NM_001123367_dup2_17_+_3 |
| Gm3417        | -2.765 | -4.981 | -1.715 | -4.453 | -2.771 | -4.598 | -2.571 | -4.720 | -2.494 | -3.796 | 100041586 | TCTE3    | NM_001123368_17_+_2      |
| Gm3417        | -3.938 | -4.981 | -4.119 | -4.670 | -4.965 | -4.854 | -4.752 | -4.825 | -4.452 | -4.361 | 100041586 | TCTE3    | NM_001123368_dup1_17_+_3 |

|               |        |        |        |        |        |        |        |        |        |        |           |          |                         |
|---------------|--------|--------|--------|--------|--------|--------|--------|--------|--------|--------|-----------|----------|-------------------------|
| Gm3417        | -1.196 | -4.981 | -3.971 | -4.625 | -2.798 | -4.927 | -2.693 | -4.693 | -4.559 | -4.583 | 100041586 | TCTE3    | NM_001123368_dup2_17_-1 |
| 9030025P20Rik | 4.063  | 3.809  | 2.957  | 3.008  | 2.920  | 3.017  | 2.739  | 2.896  | 2.702  | 2.559  | 100041574 | NA       | NM_001123370_17_+1      |
| Pnp2          | -0.288 | -1.206 | 0.730  | -0.547 | 2.029  | -1.726 | 1.803  | -0.877 | 2.314  | -0.011 | 667034    | PNP      | NM_001123371_14_+1      |
| Gm3435        | 2.977  | 1.336  | 3.357  | 0.984  | 2.558  | 0.377  | 2.539  | 0.535  | 2.665  | 1.157  | 100041621 | NA       | NM_001123372_17_+1      |
| Il1r1         | -3.888 | -4.981 | -3.997 | 0.641  | -1.443 | 1.488  | -3.073 | 1.090  | -4.604 | -4.256 | 16177     | IL1R1    | NM_001123382_1_+1       |
| Cdyl          | 3.947  | 4.389  | 3.892  | 3.845  | 4.338  | 4.538  | 4.264  | 3.975  | 4.493  | 4.427  | 12593     | CDYL     | NM_001123386_13_+1      |
| Fam178b       | -1.563 | -0.621 | -4.981 | -4.981 | -4.981 | -4.981 | -4.981 | -4.981 | -4.981 | -4.981 | 381337    | FAM178B  | NM_001126046_1_-1       |
| Sema4c        | 2.492  | 2.224  | 0.900  | -0.411 | -1.516 | -4.774 | -1.208 | -2.093 | -4.551 | -4.874 | 20353     | SEMA4C   | NM_001126047_1_-1       |
| Naip2         | 2.915  | 3.160  | 3.400  | 3.132  | 3.558  | 3.759  | 4.807  | 4.922  | 6.345  | 6.490  | 17948     | NAIP     | NM_001126182_13_-1      |
| Mboat4        | -0.246 | -1.218 | -3.201 | -4.579 | -4.291 | -3.903 | -4.454 | -4.386 | -4.981 | -1.995 | 234155    | MBOAT4   | NM_001126314_8_+1       |
| Prnd          | -4.031 | -4.981 | -4.959 | -3.419 | -3.186 | -2.981 | -4.034 | -4.907 | -4.981 | -4.981 | 26434     | PRND     | NM_001126338_2_+1       |
| Mroh7         | -1.884 | -4.981 | -4.981 | -4.981 | -4.921 | -4.882 | -2.715 | -4.868 | -4.981 | -3.855 | 381538    | MROH7    | NM_001126487_4_-1       |
| Ptpn2         | 2.146  | 3.074  | 3.203  | 3.360  | 3.318  | 3.259  | 2.715  | 2.724  | 2.150  | 2.458  | 19255     | PTPN2    | NM_001127177_18_-1      |
| Zfp534        | -4.981 | 1.577  | -4.917 | 0.131  | -3.916 | 0.474  | -4.923 | -0.517 | -4.981 | -0.250 | 100503584 | ZNF616   | NM_001127188_4_-1       |
| Zfp984        | 5.752  | 4.595  | 4.617  | 4.008  | 4.934  | 4.098  | 5.094  | 4.026  | 4.870  | 4.333  | 100041677 | ZNF616   | NM_001127189_4_-1       |
| Snx16         | -0.261 | 1.157  | 0.958  | 0.407  | 1.132  | 0.900  | -0.947 | 0.202  | -0.757 | 0.117  | 74718     | SNX16    | NM_001127191_3_-1       |
| Trp53         | 3.302  | 3.653  | 3.395  | 3.788  | 3.650  | 3.692  | 3.141  | 3.543  | 2.479  | 2.956  | 22059     | TP53     | NM_001127233_11_+1      |
| Trp63         | -4.981 | -4.981 | -4.981 | -4.981 | -4.411 | -2.467 | -4.937 | -3.785 | -4.981 | -4.981 | 22061     | TP63     | NM_001127259_16_+1      |
| Trp63         | -4.981 | -4.981 | -4.981 | -4.981 | -3.560 | -3.442 | -4.981 | -4.981 | -4.981 | -4.981 | 22061     | TP63     | NM_001127260_16_+1      |
| Trp63         | -4.981 | -3.408 | -4.981 | -4.981 | -3.061 | -4.745 | -4.964 | -4.552 | -4.981 | -4.981 | 22061     | TP63     | NM_001127261_16_+1      |
| Trp63         | -4.981 | -4.981 | -4.965 | -4.965 | -4.896 | -1.148 | -3.652 | -4.888 | -4.981 | -4.981 | 22061     | TP63     | NM_001127262_16_+1      |
| Trp63         | -4.981 | -4.981 | -4.981 | -4.981 | -4.966 | -4.743 | -4.978 | -4.973 | -4.981 | -4.981 | 22061     | TP63     | NM_001127263_16_+1      |
| Trp63         | -4.981 | -4.981 | -4.974 | -4.974 | -3.866 | 0.216  | -4.865 | -4.512 | -4.981 | -4.981 | 22061     | TP63     | NM_001127264_16_+1      |
| Trp63         | -4.981 | -4.981 | -4.981 | -4.981 | -4.933 | -2.695 | -4.980 | -4.670 | -4.981 | -4.981 | 22061     | TP63     | NM_001127265_16_+1      |
| Gucy2c        | 0.202  | -1.418 | 0.800  | -0.352 | -0.415 | -4.739 | 0.004  | -4.493 | -3.365 | -4.124 | 14917     | GUCY2C   | NM_001127318_6_-1       |
| Erccl         | 0.481  | -2.756 | -1.263 | -4.914 | -1.292 | -4.799 | -0.670 | -4.555 | -0.538 | -2.151 | 13870     | ERCC1    | NM_001127324_7_+1       |
| Pparg         | -1.325 | -4.686 | 1.100  | 1.316  | -1.537 | -1.179 | 3.483  | 3.656  | 2.830  | 3.218  | 19016     | PPARG    | NM_001127330_6_+1       |
| Aldh7a1       | 1.842  | 1.411  | 1.497  | 1.135  | 1.063  | 1.114  | 0.320  | 0.468  | 0.632  | -0.208 | 110695    | ALDH7A1  | NM_001127338_18_-1      |
| Acrbp         | 0.860  | 0.838  | 1.289  | 1.262  | 1.152  | 1.272  | 1.710  | 1.552  | 1.387  | 2.130  | 54137     | ACRBP    | NM_001127340_6_+1       |
| Ndufaf2       | 4.797  | 4.817  | 3.766  | 3.924  | 3.473  | 3.565  | 3.762  | 3.464  | 1.725  | 2.023  | 75597     | NDUFAF2  | NM_001127346_13_-1      |
| Snx10         | 3.673  | 3.662  | 4.658  | 4.454  | 5.565  | 5.572  | 5.564  | 4.650  | 5.621  | 6.078  | 71982     | SNX10    | NM_001127348_6_+1       |
| Snx10         | 2.508  | 1.920  | 6.352  | 6.171  | 5.957  | 5.653  | 5.502  | 5.633  | 6.360  | 6.472  | 71982     | SNX10    | NM_001127349_6_+1       |
| Sirt3         | 5.558  | 4.953  | 3.243  | 3.048  | 3.651  | 3.948  | 3.905  | 3.707  | 4.039  | 3.402  | 64384     | SIRT3    | NM_001127351_7_-1       |
| Adgb          | -3.843 | -4.981 | -0.096 | -0.007 | -1.175 | -1.811 | -0.060 | 0.341  | -0.716 | -1.605 | 215772    | ADGB     | NM_001127353_10_-1      |
| Eif2b4        | 0.939  | -0.501 | 1.108  | 1.262  | 1.893  | 2.075  | 2.206  | 1.746  | 2.018  | 1.216  | 13667     | EIF2B4   | NM_001127355_5_-1       |
| Eif2b4        | 3.733  | 3.917  | 2.748  | 3.167  | 2.707  | 2.700  | 3.107  | 2.623  | 2.758  | 2.872  | 13667     | EIF2B4   | NM_001127356_5_-1       |
| Inpp5a        | 4.660  | 4.194  | 3.265  | 3.280  | 3.428  | 3.472  | 3.187  | 3.397  | 4.775  | 4.643  | 212111    | INPP5A   | NM_001127363_7_+1       |
| Dnajb6        | 2.051  | 2.658  | 1.734  | 1.972  | 1.432  | 1.376  | 0.302  | 0.276  | 1.353  | 1.703  | 23950     | DNAJB6   | NM_001127367_5_+1       |
| Wisp3         | -4.981 | -4.981 | -4.936 | -4.531 | -4.227 | -4.559 | -4.209 | -4.663 | -4.190 | -2.993 | 327743    | WISP3    | NM_001127376_10_-1      |
| Rbm47         | 4.739  | 5.181  | 5.084  | 5.479  | 4.773  | 5.327  | 4.308  | 4.298  | 4.431  | 4.978  | 245945    | RBM47    | NM_001127382_5_-1       |
| Meioc         | -2.075 | -4.981 | -4.977 | -4.300 | -4.829 | -4.571 | -3.813 | -4.900 | -2.310 | -2.982 | 268491    | MEIOC    | NM_001127576_11_+1      |
| Tspan32       | -1.872 | -1.259 | -4.333 | 0.840  | -0.154 | 2.380  | 2.881  | 4.166  | 2.714  | 2.893  | 27027     | TSPAN32  | NM_001128080_7_+1       |
| Tspan32       | -1.096 | -2.385 | -2.467 | -0.064 | -1.053 | 1.876  | 2.295  | 3.895  | 3.201  | 3.809  | 27027     | TSPAN32  | NM_001128081_7_+1       |
| Tspan32       | -4.887 | -1.750 | -2.904 | -1.245 | -4.769 | -4.128 | 0.877  | 1.296  | 1.695  | 1.601  | 27027     | TSPAN32  | NM_001128082_7_+1       |
| Arhgap21      | -0.527 | 0.125  | -1.412 | 0.957  | -2.148 | -4.661 | -0.805 | -0.786 | -3.673 | -3.612 | 71435     | ARHGAP21 | NM_001128084_2_-1       |
| Anks1b        | -4.981 | -4.981 | -4.981 | -4.981 | -4.564 | -4.901 | -4.376 | -4.966 | -4.981 | -4.981 | 77531     | ANKS1B   | NM_001128086_10_+1      |
| Atp13a3       | 3.434  | 3.731  | 2.787  | 2.701  | 3.830  | 3.447  | 3.165  | 4.089  | 4.056  | 5.012  | 224088    | ATP13A3  | NM_001128094_16_-1      |
| Atp13a3       | 3.906  | 3.508  | 3.560  | 3.319  | 3.352  | 3.368  | 4.359  | 3.430  | 5.151  | 5.009  | 224088    | ATP13A3  | NM_001128096_16_-1      |
| Cd200r3       | -4.845 | -4.827 | -4.865 | -4.969 | -4.959 | -4.455 | 1.027  | -4.346 | -4.981 | -4.981 | 74603     | NA       | NM_001128132_16_+1      |
| Cd200r3       | -0.579 | -2.353 | -1.782 | -3.162 | -1.924 | -2.846 | -1.193 | -3.568 | -4.981 | -4.981 | 74603     | NA       | NM_001128133_16_+1      |
| Cecr2         | 1.016  | 2.679  | -2.382 | 0.140  | -0.077 | 1.251  | -0.084 | 1.410  | -0.588 | -0.087 | 330409    | CECR2    | NM_001128151_6_+1       |
| Cyld          | 0.404  | -2.574 | 1.264  | -0.968 | -2.483 | -0.323 | -1.720 | -1.597 | -4.064 | -4.251 | 74256     | CYLD     | NM_001128170_8_+1       |
| Cyld          | 4.273  | 4.968  | 4.933  | 4.972  | 5.741  | 5.189  | 4.820  | 4.583  | 4.787  | 4.740  | 74256     | CYLD     | NM_001128171_8_+1       |
| Dlgap1        | -4.981 | -4.981 | -3.219 | -3.175 | -4.525 | -3.227 | -4.981 | -4.981 | -3.461 | -4.981 | 224997    | DLGAP1   | NM_001128180_17_+1      |
| Dlgap1        | -4.981 | -4.981 | -3.425 | -4.929 | -4.807 | -3.113 | -3.802 | -4.611 | -3.738 | -4.981 | 224997    | DLGAP1   | NM_001128181_17_+1      |
| Dock9         | -4.164 | -4.451 | -4.241 | -4.742 | -3.922 | -4.968 | -4.381 | -3.192 | -4.789 | -4.817 | 105445    | DOCK9    | NM_001128307_14_-1      |
| Dock9         | -4.100 | -4.409 | -3.049 | -3.314 | -3.787 | -4.955 | -4.341 | -2.955 | -4.762 | -4.790 | 105445    | DOCK9    | NM_001128308_14_-1      |
| Gpank1        | 2.908  | 2.247  | 2.249  | 2.304  | 2.559  | 2.334  | 1.971  | 1.720  | 2.414  | 2.338  | 81845     | GPANK1   | NM_001128597_17_+1      |
| Mthfs1        | 5.999  | 6.676  | 6.134  | 6.460  | 6.645  | 6.933  | 6.900  | 6.855  | 5.399  | 5.853  | 100039707 | MTHFS    | NM_001128601_9_-1       |
| Psen2         | 4.218  | 4.075  | 4.188  | 4.383  | 3.182  | 3.383  | 3.939  | 4.480  | 5.165  | 4.673  | 19165     | PSEN2    | NM_001128605_1_-1       |
| Epb41         | -3.606 | 0.729  | 2.859  | 2.289  | 2.661  | 2.129  | 2.138  | 2.725  | 2.012  | 2.045  | 269587    | EPB41    | NM_001128606_4_-1       |
| Epb41         | 2.810  | 3.342  | 5.046  | 4.977  | 4.414  | 4.677  | 4.849  | 4.957  | 5.837  | 5.643  | 269587    | EPB41    | NM_001128607_4_-1       |
| Dedd          | 3.837  | 3.199  | 3.289  | 2.846  | 3.419  | 3.453  | 3.563  | 2.928  | 3.035  | 3.279  | 21945     | DEDD     | NM_001128609_1_+1       |
| Igsf9b        | -4.981 | -4.981 | -4.981 | -4.981 | -4.948 | -4.823 | -4.981 | -4.981 | -4.981 | -4.981 | 235086    | IGSF9B   | NM_001129787_9_+1       |
| Cep250        | 0.740  | -0.363 | 1.500  | -0.636 | 2.122  | 0.781  | 1.391  | -0.752 | 1.847  | -2.184 | 16328     | CEP250   | NM_001129999_2_+1       |
| Cep250        | 1.283  | -0.307 | 3.316  | 1.712  | 3.278  | 0.648  | 2.585  | -1.334 | 3.742  | 1.552  | 16328     | CEP250   | NM_001130000_2_+1       |
| Gspt1         | 4.044  | 4.549  | 4.497  | 4.551  | 4.280  | 4.307  | 4.253  | 4.411  | 4.146  | 4.244  | 14852     | GSPT1    | NM_001130008_16_-1      |
| Drosha        | -0.734 | -2.444 | -1.491 | -0.105 | -1.232 | -4.093 | -0.483 | -3.556 | -2.586 | -1.750 | 14000     | DROSHA   | NM_001130149_15_+1      |
| Arhgef1       | 3.852  | 4.007  | 4.770  | 4.456  | 5.569  | 5.222  | 5.545  | 5.439  | 7.702  | 7.058  | 16801     | ARHGEF1  | NM_001130150_7_+1       |
| Arhgef1       | 3.208  | 3.071  | 4.271  | 4.439  | 3.939  | 3.369  | 4.949  | 5.246  | 7.609  | 7.075  | 16801     | ARHGEF1  | NM_001130151_7_+1       |
| Arhgef1       | 0.567  | -0.663 | 1.512  | 3.122  | 2.569  | 2.959  | 3.571  | 3.392  | 4.310  | 3.610  | 16801     | ARHGEF1  | NM_001130152_7_+1       |
| Arhgef1       | 5.304  | 5.031  | 5.356  | 5.042  | 6.161  | 6.173  | 6.185  | 6.208  | 7.462  | 6.795  | 16801     | ARHGEF1  | NM_001130153_7_+1       |
| Oxr1          | -2.908 | 1.308  | 0.787  | -0.443 | -3.064 | -4.720 | -0.992 | -0.795 | 1.673  | 1.930  | 170719    | OXR1     | NM_001130163_15_+1      |
| Oxr1          | 6.010  | 5.829  | 4.074  | 4.264  | 4.349  | 4.443  | 3.973  | 3.814  | -1.006 | 1.369  | 170719    | OXR1     | NM_001130164_15_+1      |

|               |        |        |        |        |        |        |        |        |        |        |        |          |                    |
|---------------|--------|--------|--------|--------|--------|--------|--------|--------|--------|--------|--------|----------|--------------------|
| Oxr1          | 2.559  | 1.390  | 3.618  | 3.030  | 2.452  | 1.484  | 4.880  | 4.250  | 6.820  | 6.401  | 170719 | OXR1     | NM_001130165_15_+1 |
| Oxr1          | -4.387 | -4.121 | 0.690  | -3.117 | -1.825 | -1.282 | -2.574 | -2.826 | 0.654  | -1.774 | 170719 | OXR1     | NM_001130166_15_+1 |
| Zfp207        | 4.920  | 4.529  | 4.748  | 4.792  | 4.739  | 4.867  | 4.047  | 3.919  | 4.718  | 3.751  | 22680  | ZNF207   | NM_001130169_11_+1 |
| Zfp207        | 0.122  | 1.061  | 1.236  | 0.641  | 1.224  | -0.042 | 1.616  | 0.758  | -0.020 | 1.343  | 22680  | ZNF207   | NM_001130170_11_+1 |
| Zfp207        | 6.640  | 6.995  | 7.432  | 7.492  | 6.909  | 6.859  | 6.999  | 7.027  | 6.629  | 7.105  | 22680  | ZNF207   | NM_001130171_11_+1 |
| Tnnt2         | -4.430 | -3.769 | -4.292 | -4.577 | -4.546 | -4.872 | -4.960 | -4.831 | -4.981 | -4.981 | 21956  | TNNT2    | NM_001130174_1_+1  |
| Tnnt2         | -4.354 | -3.621 | -4.208 | -4.468 | -4.548 | -4.858 | -4.958 | -4.805 | -4.981 | -4.981 | 21956  | TNNT2    | NM_001130175_1_+1  |
| Tnnt2         | -4.981 | -4.837 | -2.033 | -2.953 | -2.387 | -2.113 | -4.984 | -4.905 | -4.981 | -4.981 | 21956  | TNNT2    | NM_001130176_1_+1  |
| Tnnt2         | -4.490 | -3.887 | -4.415 | -4.674 | -4.559 | -4.919 | -4.962 | -4.861 | -4.981 | -4.981 | 21956  | TNNT2    | NM_001130177_1_+1  |
| Tnnt2         | -4.981 | -4.981 | -4.785 | -4.933 | -4.913 | -4.941 | -4.980 | -4.980 | -4.981 | -4.981 | 21956  | TNNT2    | NM_001130178_1_+1  |
| Tnnt2         | -4.981 | -4.981 | -4.776 | -4.929 | -4.905 | -4.950 | -4.979 | -4.980 | -4.981 | -4.981 | 21956  | TNNT2    | NM_001130179_1_+1  |
| Tnnt2         | -4.981 | -3.534 | -4.739 | -4.587 | -4.897 | -4.817 | -4.978 | -4.980 | -4.981 | -4.981 | 21956  | TNNT2    | NM_001130180_1_+1  |
| Tnnt2         | -4.981 | -4.981 | -4.720 | -4.391 | -4.870 | -4.931 | -4.977 | -4.979 | -4.981 | -4.981 | 21956  | TNNT2    | NM_001130181_1_+1  |
| Jade1         | 4.704  | 4.727  | 0.689  | 0.166  | 1.756  | 0.778  | 1.637  | 1.474  | 1.164  | 1.893  | 269424 | JADE1    | NM_001130184_3_+1  |
| Jade1         | 1.922  | 0.842  | -0.584 | -0.226 | 0.143  | 1.606  | 0.261  | 0.665  | -2.395 | 0.212  | 269424 | JADE1    | NM_001130185_3_+1  |
| Jade1         | 3.283  | 2.809  | 0.942  | 0.135  | 1.667  | 0.238  | 0.879  | 2.211  | 1.660  | 1.223  | 269424 | JADE1    | NM_001130186_3_+1  |
| Smarcd2       | 4.765  | 4.746  | 5.170  | 5.339  | 5.614  | 5.776  | 5.504  | 5.729  | 6.352  | 6.384  | 83796  | SMARCD2  | NM_001130187_11_-1 |
| Sgce          | -0.041 | -4.184 | -4.963 | -4.929 | -4.972 | -4.968 | -4.977 | -4.975 | -4.981 | -4.917 | 20392  | SGCE     | NM_001130188_6_-1  |
| Sgce          | -4.465 | -4.793 | -4.980 | -4.963 | -4.929 | -4.734 | -4.947 | -4.923 | -4.981 | -4.981 | 20392  | SGCE     | NM_001130189_6_-1  |
| Sgce          | -2.087 | -4.255 | -4.981 | -4.974 | -4.966 | -4.952 | -4.970 | -4.962 | -4.981 | -4.981 | 20392  | SGCE     | NM_001130190_6_-1  |
| Sgce          | -4.643 | -4.822 | -4.980 | -4.971 | -4.958 | -4.919 | -4.965 | -4.954 | -4.981 | -4.981 | 20392  | SGCE     | NM_001130191_6_-1  |
| Arf1          | -0.270 | 1.156  | 0.973  | 1.080  | 0.859  | 0.645  | 0.523  | 1.163  | 1.304  | 2.266  | 11840  | ARF1     | NM_001130408_11_-1 |
| Ptk2          | 0.030  | -0.489 | 0.161  | -0.743 | 1.349  | 0.579  | -1.838 | -1.284 | -4.828 | -1.610 | 14083  | PTK2     | NM_001130409_15_-1 |
| Lpin1         | 0.093  | -2.679 | 1.865  | -1.803 | 1.928  | -4.606 | 1.723  | -4.373 | 2.076  | -4.133 | 14245  | LPIN1    | NM_001130412_12_-1 |
| Hdac6         | 3.106  | 3.190  | 3.909  | 4.128  | 3.584  | 3.349  | 2.817  | 2.757  | 2.950  | 3.285  | 15185  | HDAC6    | NM_001130416_X_-1  |
| Hpca          | -4.981 | -4.981 | -4.972 | -4.975 | -4.978 | -4.977 | -4.980 | -4.978 | -4.981 | -4.965 | 15444  | HPCA     | NM_001130419_4_-1  |
| Hras          | 4.675  | 4.771  | 4.004  | 4.416  | 3.863  | 3.763  | 3.820  | 3.736  | 4.101  | 4.000  | 15461  | HRAS     | NM_001130443_7_-1  |
| Hras          | 1.487  | 2.041  | 1.674  | 1.231  | 0.660  | 1.126  | 0.426  | 0.411  | 1.630  | 1.237  | 15461  | HRAS     | NM_001130444_7_-1  |
| Nfe2l1        | -0.926 | 1.276  | 3.828  | 4.523  | 2.992  | 3.876  | 2.722  | 1.926  | 3.026  | 4.088  | 18023  | NFE2L1   | NM_001130450_11_-1 |
| Nfe2l1        | 0.966  | 1.919  | -1.423 | 0.007  | 1.437  | -0.173 | -0.868 | -1.211 | 1.568  | -0.798 | 18023  | NFE2L1   | NM_001130451_11_-1 |
| Nfe2l1        | 2.018  | 0.881  | -1.505 | -1.155 | 0.641  | -1.994 | -0.858 | -0.470 | 1.517  | 1.591  | 18023  | NFE2L1   | NM_001130452_11_-1 |
| Nfe2l1        | -0.298 | 0.679  | -2.477 | -0.236 | 0.167  | -1.168 | -1.658 | -2.744 | 0.504  | -2.166 | 18023  | NFE2L1   | NM_001130453_11_-1 |
| Nfe2l1        | 0.714  | -0.273 | -2.821 | -3.346 | -0.466 | -3.304 | -1.937 | -2.455 | 0.290  | -3.250 | 18023  | NFE2L1   | NM_001130454_11_-1 |
| Sema6b        | -3.284 | -4.981 | -0.847 | -2.095 | -1.848 | -2.054 | -2.609 | -2.341 | -2.420 | -4.053 | 20359  | SEMA6B   | NM_001130456_17_-1 |
| Tbfg4         | 1.825  | 3.247  | 1.429  | 3.426  | 0.852  | 2.946  | -1.053 | 3.189  | 1.363  | 2.925  | 21379  | TBRG4    | NM_001130457_11_-1 |
| Tcn2          | 4.954  | 5.354  | 2.914  | 3.651  | 3.266  | 3.590  | 4.546  | 4.853  | 6.393  | 6.236  | 21452  | TCN2     | NM_001130458_11_-1 |
| Tcn2          | 1.337  | 1.755  | 0.381  | 1.410  | -0.659 | 0.173  | 2.990  | 1.171  | 2.984  | 2.940  | 21452  | TCN2     | NM_001130459_11_-1 |
| Tpst1         | 0.247  | 0.824  | 4.636  | 4.321  | 3.895  | 3.134  | 4.205  | 4.344  | 4.654  | 4.086  | 22021  | TPST1    | NM_001130476_5_+1  |
| Srrm1         | 5.483  | 5.294  | 4.174  | 3.355  | 4.109  | 4.767  | 4.258  | 3.837  | 2.208  | 1.982  | 51796  | NA       | NM_001130477_4_-1  |
| Nucb2         | 9.685  | 9.753  | 5.934  | 6.178  | 3.653  | 4.181  | 4.455  | 5.342  | 5.094  | 5.698  | 53322  | NUCB2    | NM_001130479_7_+1  |
| Rpl35a        | 5.591  | 4.677  | 5.801  | 5.358  | 5.381  | 4.909  | 5.704  | 5.107  | 4.311  | 3.597  | 57808  | RPL35A   | NM_001130484_16_+1 |
| Rpl35a        | 8.462  | 7.136  | 8.711  | 7.696  | 8.434  | 7.700  | 8.774  | 7.669  | 7.695  | 6.788  | 57808  | RPL35A   | NM_001130485_16_+1 |
| Ace2          | -4.981 | -4.981 | -4.128 | -4.538 | -4.949 | -4.930 | -4.979 | -4.980 | -4.981 | -4.981 | 70008  | ACE2     | NM_001130513_X_+1  |
| Hexim2        | 0.459  | 0.508  | 0.056  | -1.648 | -0.110 | -1.598 | -1.429 | -0.422 | -0.446 | -4.249 | 71059  | HEXIM2   | NM_001130515_11_+1 |
| Hexim2        | -2.933 | -0.111 | -2.502 | -1.044 | -0.838 | -1.043 | -3.704 | -3.542 | -2.487 | -0.958 | 71059  | HEXIM2   | NM_001130516_11_+1 |
| Lzts2         | 0.728  | 0.731  | 0.607  | 0.059  | -2.321 | -2.630 | -2.932 | -2.687 | -2.703 | -3.081 | 226154 | LZTS2    | NM_001130525_19_+1 |
| Lzts2         | 2.591  | 2.266  | 0.380  | 0.631  | -1.316 | -1.828 | -0.918 | -0.494 | -2.088 | -1.193 | 226154 | LZTS2    | NM_001130526_19_+1 |
| Zkscan17      | 0.849  | 2.449  | 1.937  | 0.815  | 1.420  | 0.758  | 0.871  | -0.029 | 1.381  | -0.107 | 268417 | ZNF496   | NM_001130529_11_-1 |
| Kars          | 1.461  | 3.275  | 3.008  | 3.046  | 2.545  | 3.183  | 2.582  | 2.380  | 2.802  | 2.686  | 85305  | KARS     | NM_001130868_8_-1  |
| Gfap          | -4.981 | -4.981 | -4.985 | -3.696 | -4.916 | -4.391 | -4.956 | -4.969 | -4.981 | -4.444 | 14580  | GFAP     | NM_001131020_11_-1 |
| Pttg1         | 6.655  | 3.584  | 6.046  | 5.227  | 6.520  | 5.359  | 6.263  | 4.478  | 5.279  | 2.833  | 30939  | PTTG1    | NM_001131054_11_-1 |
| Rfesd         | 3.958  | 4.842  | 2.056  | 3.027  | 2.617  | 3.625  | 2.365  | 3.166  | 1.642  | 2.555  | 218341 | RFESD    | NM_001131068_13_-1 |
| Rfesd         | 0.685  | 0.453  | -0.177 | -0.108 | -0.198 | -0.853 | 0.297  | -2.027 | 0.150  | -1.373 | 218341 | RFESD    | NM_001131069_13_-1 |
| Nol4l         | -4.881 | -4.981 | -3.367 | 0.116  | -2.885 | -3.307 | -1.361 | -1.933 | -1.179 | 0.530  | 329540 | NOL4L    | NM_001134300_2_-1  |
| Iqsec1        | 2.120  | 1.654  | 3.073  | 3.046  | 2.515  | 1.910  | 0.579  | 2.231  | 2.115  | 2.245  | 232227 | IQSEC1   | NM_001134383_6_-1  |
| Iqsec1        | 3.895  | 3.430  | 4.267  | 4.500  | 3.680  | 3.431  | 3.046  | 2.754  | 2.931  | 2.465  | 232227 | IQSEC1   | NM_001134384_6_-1  |
| Gpr160        | 1.400  | 0.626  | -1.754 | -3.993 | -2.819 | -1.141 | 0.327  | 0.061  | 2.806  | 2.142  | 71862  | GPR160   | NM_001134385_3_+1  |
| Gpr160        | -3.822 | -4.026 | -2.602 | -3.237 | -2.227 | -2.111 | -0.719 | -4.872 | -0.238 | -0.936 | 71862  | GPR160   | NM_001134386_3_+1  |
| Apobec1       | 5.193  | 3.246  | 3.133  | 2.787  | 6.391  | 5.649  | 7.223  | 6.965  | 8.292  | 7.794  | 11810  | APOBEC1  | NM_001134391_6_-1  |
| Megf11        | -1.385 | -1.668 | -1.953 | -2.241 | -1.409 | -4.215 | -3.200 | -4.199 | -2.569 | -4.227 | 214058 | MEGF11   | NM_001134399_9_+1  |
| Cdv3          | 1.957  | 1.572  | 0.394  | 0.586  | -2.073 | -1.598 | -0.027 | -0.597 | -1.287 | -1.149 | 321022 | CDV3     | NM_001134426_9_-1  |
| Cdv3          | 3.443  | 3.193  | 1.873  | 2.546  | 2.318  | 2.251  | 1.815  | 2.312  | 2.773  | 3.292  | 321022 | CDV3     | NM_001134427_9_-1  |
| Nxpe3         | 3.274  | 3.335  | 1.993  | 1.953  | 3.985  | 4.194  | 2.860  | 2.734  | 1.562  | 1.625  | 385658 | NXPE3    | NM_001134457_16_-1 |
| Il9r          | 2.743  | 0.383  | -2.643 | -0.808 | 0.995  | 0.816  | -2.171 | 1.583  | -3.373 | -2.497 | 16199  | IL9R     | NM_001134458_11_-1 |
| Prickle2      | -4.492 | -4.981 | -4.713 | -4.906 | -4.971 | -4.795 | -4.981 | -4.981 | -4.981 | -4.053 | 243548 | PRICKLE2 | NM_001134459_6_-1  |
| Dennd6a       | 6.411  | 6.565  | 3.914  | 4.093  | 4.092  | 4.135  | 4.767  | 4.943  | 5.476  | 5.866  | 211922 | DENND6A  | NM_001134465_14_+1 |
| Vcan          | -4.981 | -4.981 | -4.978 | -4.978 | -4.629 | -4.977 | -4.954 | -4.407 | -3.874 | -1.853 | 13003  | VCAN     | NM_001134474_13_-1 |
| Vcan          | -4.981 | -4.981 | -4.203 | -4.982 | -4.942 | -3.572 | -3.970 | -3.368 | 2.172  | 0.975  | 13003  | VCAN     | NM_001134475_13_-1 |
| Plcx2         | 2.651  | 2.870  | 2.544  | 2.047  | 2.430  | 2.233  | 2.091  | 2.430  | 1.256  | 2.257  | 433022 | PLCX2    | NM_001134480_16_-1 |
| Tomm5         | 3.984  | 3.417  | 3.352  | 3.410  | 2.552  | 2.954  | 2.870  | 3.062  | 2.266  | 2.054  | 68512  | NA       | NM_001134646_4_-1  |
| Ost4          | 6.782  | 6.681  | 6.210  | 6.101  | 5.524  | 5.904  | 6.163  | 6.068  | 5.297  | 5.436  | 67695  | NA       | NM_001134692_5_-1  |
| 2810006K23Rik | 4.507  | 4.200  | 3.373  | 3.332  | 3.590  | 3.507  | 3.762  | 3.376  | 2.911  | 2.869  | 72650  | C12orf65 | NM_001134717_5_+1  |
| Tdrd5         | -4.981 | -4.981 | -4.981 | -4.981 | -4.980 | -4.980 | -4.981 | -4.981 | -4.981 | -2.452 | 214575 | TDRD5    | NM_001134741_1_-1  |
| Ccdc62        | 2.230  | 1.510  | 0.896  | 0.593  | 1.453  | 0.600  | 0.121  | -0.296 | -0.622 | -1.634 | 208908 | CCDC62   | NM_001134767_5_+1  |

|               |        |        |        |        |        |        |        |        |        |        |        |          |                    |
|---------------|--------|--------|--------|--------|--------|--------|--------|--------|--------|--------|--------|----------|--------------------|
| Osbpl9        | 4.532  | 3.239  | 5.154  | 4.706  | 4.134  | 3.700  | 4.420  | 3.772  | 4.870  | 3.143  | 100273 | OSBPL9   | NM_001134791_4_-1  |
| Apol7e        | -4.981 | -4.981 | 0.202  | -3.812 | -0.812 | -4.537 | -1.588 | -4.924 | -1.715 | -3.660 | 666348 | NA       | NM_001134802_15_+1 |
| Lpgat1        | 5.787  | 6.110  | 5.266  | 5.439  | 4.677  | 5.016  | 4.251  | 4.969  | 5.641  | 6.057  | 226856 | LPGAT1   | NM_001134829_1_+1  |
| AU019823      | 1.578  | 2.423  | 1.717  | 1.162  | 2.701  | 2.369  | 1.753  | 2.499  | 0.820  | 2.001  | 270156 | C11orf57 | NM_001134902_9_-1  |
| PPP2R2C       | 3.097  | 3.155  | 4.260  | 4.443  | 3.479  | 3.192  | 3.922  | 4.346  | 5.695  | 5.451  | 26931  | NA       | NM_001135001_12_+1 |
| Zfp266        | 2.355  | 3.826  | 2.956  | 2.919  | 3.178  | 2.819  | 3.105  | 3.130  | 3.109  | 3.566  | 77519  | ZNF266   | NM_001135019_9_-1  |
| Klf14         | -4.981 | -4.981 | -4.628 | -4.980 | -4.953 | -4.953 | -4.962 | -4.972 | -4.981 | -4.981 | 619665 | KLF14    | NM_001135093_6_-1  |
| IL34          | 0.357  | 0.495  | -4.962 | -4.962 | -4.906 | -4.919 | -4.940 | -3.951 | -4.981 | -4.981 | 76527  | IL34     | NM_001135100_8_-1  |
| Dnaja3        | 4.991  | 4.948  | 4.806  | 4.805  | 4.781  | 4.854  | 4.716  | 4.972  | 5.131  | 4.748  | 83945  | DNAJA3   | NM_001135112_16_+1 |
| Gm12250       | 2.584  | 1.001  | 2.302  | 1.968  | 3.908  | 2.832  | 4.666  | 3.591  | 5.038  | 4.006  | 631323 | NA       | NM_001135115_11_+1 |
| Slc39a8       | -0.122 | -0.542 | 0.273  | 0.492  | -0.148 | -0.522 | 0.383  | 0.122  | -0.878 | 0.387  | 67547  | SLC39A8  | NM_001135149_3_+1  |
| Slc39a8       | -4.475 | -1.185 | -0.945 | -1.746 | -2.650 | -1.045 | -2.797 | -1.621 | -0.475 | -1.067 | 67547  | SLC39A8  | NM_001135150_3_+1  |
| Slc39a14      | 4.226  | 4.118  | -0.526 | -0.454 | -1.251 | -0.913 | -0.467 | -1.055 | -1.223 | -3.800 | 213053 | SLC39A14 | NM_001135151_14_-1 |
| Slc39a14      | 1.277  | -0.082 | -1.738 | -1.004 | -1.753 | -0.372 | 0.617  | -0.389 | -3.648 | -1.048 | 213053 | SLC39A14 | NM_001135152_14_-1 |
| Asap2         | -3.676 | -3.354 | -4.017 | -4.611 | -4.669 | -4.802 | -3.827 | -4.700 | -4.086 | -4.774 | 211914 | ASAP2    | NM_001135192_12_+1 |
| Ccdc36        | 2.890  | 2.699  | -0.711 | -0.204 | -2.992 | -2.513 | -3.351 | -3.362 | -4.218 | -3.260 | 434438 | CCDC36   | NM_001135198_9_-1  |
| Sos2          | 3.566  | 3.628  | 4.001  | 3.863  | 4.041  | 3.666  | 4.550  | 4.397  | 5.782  | 5.657  | 20663  | SOS2     | NM_001135559_12_-1 |
| 1190007I07Rik | 4.219  | 2.322  | 3.401  | 2.018  | 3.356  | 1.707  | 3.207  | 1.915  | 1.445  | 0.183  | 544717 | C12orf73 | NM_001135567_10_-1 |
| 1190007I07Rik | 1.645  | 1.918  | 1.470  | 1.725  | 0.665  | 1.822  | 0.023  | 1.340  | -0.391 | 0.225  | 544717 | C12orf73 | NM_001135568_10_-1 |
| 1190007I07Rik | -1.652 | -0.257 | -2.099 | 0.070  | -2.045 | -0.832 | -4.903 | -1.078 | -1.504 | -1.123 | 544717 | C12orf73 | NM_001135569_10_-1 |
| Smim13        | 3.706  | 3.679  | 2.666  | 3.091  | 2.476  | 3.128  | 3.143  | 3.545  | 4.731  | 5.396  | 108934 | SMIM13   | NM_001135577_13_+1 |
| 3110062M04Rik | 0.432  | 0.777  | 1.048  | 2.104  | 0.727  | 0.632  | -0.019 | 0.721  | 1.050  | 1.505  | 78412  | C7orf49  | NM_001135611_6_-1  |
| Ptprj         | 0.784  | 0.923  | 1.819  | 0.867  | 1.041  | 0.912  | 0.837  | 1.307  | 3.575  | 2.958  | 19271  | PTPRJ    | NM_001135657_2_-1  |
| Sh3kbp1       | 5.700  | 5.622  | 4.639  | 5.065  | 5.827  | 5.701  | 6.334  | 6.525  | 7.920  | 7.944  | 58194  | SH3KBP1  | NM_001135727_X_+1  |
| Sh3kbp1       | -1.807 | -4.434 | -4.254 | -4.854 | -3.489 | -4.802 | -0.234 | -3.134 | -1.561 | -1.449 | 58194  | SH3KBP1  | NM_001135728_X_+1  |
| Ate1          | 4.668  | 4.973  | 4.593  | 4.578  | 4.359  | 4.531  | 4.764  | 4.500  | 4.007  | 4.436  | 11907  | ATE1     | NM_001136054_7_-1  |
| Cd82          | 5.038  | 4.982  | 4.609  | 4.986  | 5.067  | 5.769  | 5.162  | 5.121  | 3.317  | 3.005  | 12521  | CD82     | NM_001136055_2_-1  |
| Crmp1         | -4.630 | -4.015 | -4.975 | -4.921 | -4.981 | -4.978 | -4.944 | -4.891 | -4.981 | -4.981 | 12933  | CRMP1    | NM_001136058_5_+1  |
| Ednrb         | -3.028 | -4.981 | -4.633 | -3.870 | -4.945 | -4.945 | -4.975 | -4.971 | 0.587  | 1.760  | 13618  | EDNRB    | NM_001136061_14_-1 |
| Eno3          | 2.812  | 2.817  | 4.759  | 5.992  | 6.152  | 7.345  | 6.342  | 6.379  | 5.692  | 5.132  | 13808  | ENO3     | NM_001136062_11_+1 |
| Gfra4         | -4.981 | -0.326 | -4.987 | -2.840 | -4.896 | -4.021 | -4.974 | -2.501 | -4.981 | -3.479 | 14588  | GFR4     | NM_001136063_2_-1  |
| Bscl2         | 5.715  | 5.613  | 4.494  | 4.408  | 4.936  | 4.860  | 4.743  | 4.614  | 3.962  | 4.291  | 14705  | BSC2     | NM_001136064_19_+1 |
| Hipk2         | -3.706 | -3.680 | -0.268 | -4.520 | -0.514 | -4.678 | -3.228 | -1.836 | -0.977 | 0.152  | 15258  | HIPK2    | NM_001136065_6_-1  |
| Hmox2         | 7.922  | 8.053  | 7.093  | 6.874  | 7.382  | 6.038  | 6.974  | 6.497  | 6.765  | 6.405  | 15369  | HMOX2    | NM_001136066_16_+1 |
| Ikbkg         | 0.259  | -2.800 | -0.342 | 0.531  | -0.079 | -0.110 | 0.833  | 0.096  | 0.898  | -0.155 | 16151  | IKBK     | NM_001136067_X_+1  |
| Klrc1         | 0.697  | -2.770 | -3.663 | -1.879 | 0.133  | -0.023 | -0.160 | 0.262  | -1.047 | -2.969 | 16641  | KLRC1    | NM_001136068_6_-1  |
| Ldha          | 0.601  | -4.387 | 0.313  | -0.139 | 0.029  | -0.013 | -0.735 | 0.534  | 0.057  | -0.005 | 16828  | LDHA     | NM_001136069_7_+1  |
| Eif2d         | 5.859  | 5.735  | 4.939  | 5.099  | 4.842  | 5.151  | 4.799  | 5.045  | 4.610  | 4.545  | 16865  | EIF2D    | NM_001136070_1_+1  |
| Lsp1          | 10.335 | 10.482 | 10.429 | 10.430 | 10.831 | 10.643 | 10.369 | 10.015 | 10.083 | 9.489  | 16985  | LSP1     | NM_001136071_7_+1  |
| Nfatc2        | 1.930  | 2.254  | 4.034  | 3.548  | 4.269  | 4.094  | 3.537  | 2.915  | 3.130  | 3.918  | 18019  | NFATC2   | NM_001136073_2_-1  |
| Numb          | -4.547 | -4.428 | -3.689 | -4.058 | -4.730 | -3.475 | -4.738 | -4.670 | -3.579 | -4.683 | 18222  | NUMB     | NM_001136075_12_-1 |
| P4ha2         | -4.981 | -3.066 | -4.978 | -3.831 | -4.229 | -3.323 | -4.964 | -4.457 | -4.981 | -2.678 | 18452  | P4HA2    | NM_001136076_11_+1 |
| Enpp2         | -4.030 | -4.332 | -4.656 | -4.687 | -4.733 | -3.389 | -4.529 | -4.818 | -4.981 | -4.793 | 18606  | ENPP2    | NM_001136077_15_-1 |
| Ptger4        | 5.421  | 5.890  | 4.874  | 4.793  | 4.747  | 4.488  | 4.866  | 4.980  | 5.279  | 5.328  | 19219  | PTGER4   | NM_001136079_15_-1 |
| Ssrp1         | 6.044  | 6.094  | 5.867  | 6.264  | 6.556  | 6.389  | 6.268  | 6.374  | 6.250  | 6.074  | 20833  | SSRP1    | NM_001136081_2_+1  |
| Timeless      | 2.317  | 1.938  | -0.068 | 0.469  | 3.013  | 1.339  | 1.313  | 1.005  | 1.735  | 0.070  | 21853  | TIMELESS | NM_001136082_10_+1 |
| Uba1          | 6.379  | 6.252  | 7.263  | 7.347  | 7.226  | 7.072  | 7.319  | 7.498  | 8.127  | 8.065  | 22201  | UBA1     | NM_001136085_X_+1  |
| Dpysl3        | -3.011 | -4.981 | -4.378 | -4.737 | -3.375 | -1.954 | -3.028 | -2.132 | -4.981 | -2.031 | 22240  | DPYSL3   | NM_001136086_18_-1 |
| Slc6a18       | -4.981 | -4.981 | -4.626 | -4.966 | -4.926 | -4.972 | -4.951 | -4.946 | -4.981 | -4.981 | 22598  | SLC6A18  | NM_001136087_13_-1 |
| Poli          | 3.299  | 3.572  | 2.629  | 2.672  | 3.022  | 3.313  | 2.033  | 2.119  | -0.118 | 1.195  | 26447  | POLI     | NM_001136090_18_-1 |
| Tcirg1        | 7.280  | 7.441  | 6.701  | 6.671  | 7.344  | 7.177  | 7.141  | 7.035  | 7.802  | 7.669  | 27060  | TCIRG1   | NM_001136091_19_-1 |
| Abl2          | 3.375  | 3.258  | 2.658  | 2.459  | 2.907  | 2.694  | 2.964  | 2.414  | 2.433  | 2.069  | 11352  | ABL2     | NM_001136104_1_+1  |
| C2cd4d        | -4.981 | -4.981 | -4.981 | -4.981 | -4.664 | -4.685 | -4.941 | -4.711 | -4.981 | -4.981 | 271944 | C2CD4D   | NM_001136117_3_+1  |
| Hsbp1l1       | -3.668 | -4.981 | -1.707 | -2.162 | -4.309 | -4.959 | -4.465 | -3.922 | -4.394 | -1.140 | 66255  | HSBP1L1  | NM_001136181_18_-1 |
| Acsl3         | -3.361 | -1.716 | -4.827 | -3.921 | -4.970 | -4.976 | -4.958 | -4.979 | -3.095 | -4.552 | 74205  | ACSL3    | NM_001136222_1_+1  |
| Utp14b        | -1.992 | -0.626 | -3.664 | -3.152 | -3.472 | -2.606 | -4.293 | -4.792 | -4.217 | -4.481 | 195434 | UTP14C   | NM_001136226_1_+1  |
| Rtkn          | -4.981 | -4.981 | -0.761 | -0.700 | -3.821 | -2.949 | -2.437 | -1.487 | -1.332 | -1.930 | 20166  | RTKN     | NM_001136227_6_+1  |
| Kctd14        | 3.625  | 1.198  | 3.628  | 2.850  | 0.932  | -0.378 | 2.028  | 1.384  | -0.282 | -2.559 | 233529 | KCTD14   | NM_001136235_7_+1  |
| Fcrl1         | -0.210 | -0.506 | 2.214  | 3.206  | 3.053  | 3.617  | 3.166  | 3.411  | -0.517 | -0.127 | 229499 | FCRL1    | NM_001136236_3_+1  |
| Chdh          | 1.666  | 2.801  | -4.552 | -4.940 | -4.967 | -4.963 | -3.676 | -4.827 | -4.617 | -4.769 | 218865 | CHDH     | NM_001136240_14_+1 |
| Tom1          | -0.970 | 0.843  | -2.542 | -3.682 | -4.902 | -4.926 | -0.348 | -4.952 | -0.838 | 0.219  | 21968  | TOM1     | NM_001136259_8_+1  |
| Slc4a4        | -4.981 | -4.981 | -4.978 | -4.978 | -4.954 | -3.603 | -3.471 | -4.938 | -4.981 | -4.417 | 54403  | SLC4A4   | NM_001136260_5_+1  |
| Inafm1        | 3.222  | 2.492  | 2.491  | 2.106  | 2.849  | 2.754  | 2.651  | 2.173  | 2.442  | 1.912  | 66300  | INAFM1   | NM_001136270_7_-1  |
| Ccdc9         | -0.394 | -0.834 | 0.908  | 0.287  | 0.809  | 0.142  | 0.961  | 0.485  | 1.601  | 1.136  | 243846 | CCDC9    | NM_001136471_7_-1  |
| Gcnt1         | 2.558  | 2.378  | 1.996  | -0.910 | 1.670  | 0.460  | 2.664  | 1.042  | 3.072  | 3.264  | 14537  | GCNT1    | NM_001136484_19_-1 |
| Zfp935        | 0.350  | 2.157  | 1.265  | 1.072  | 0.720  | 0.795  | 0.928  | -0.154 | -0.214 | 1.464  | 71508  | NA       | NM_001136496_13_-1 |
| Usp51         | -4.981 | -4.981 | -4.964 | -3.563 | -2.763 | -4.080 | -3.758 | -4.179 | -4.981 | -3.229 | 635253 | USP51    | NM_001137547_X_+1  |
| Dnlz          | 1.611  | 1.459  | 0.931  | 0.383  | 0.844  | 0.627  | 0.661  | 0.998  | 1.191  | 0.447  | 52838  | DNLZ     | NM_001139503_2_-1  |
| Dnlz          | 3.027  | 2.672  | 1.709  | 2.002  | 1.724  | 2.239  | 1.736  | 1.811  | 1.459  | 1.383  | 52838  | DNLZ     | NM_001139504_2_-1  |
| Nr4a2         | -0.502 | 0.293  | 2.483  | 1.247  | 3.069  | 2.478  | 2.402  | 1.028  | 2.062  | 1.763  | 18227  | NR4A2    | NM_001139509_2_-1  |
| Raly          | 0.772  | 0.313  | 1.023  | -0.538 | -0.578 | 0.296  | 0.725  | 1.148  | 2.057  | 0.915  | 19383  | RALY     | NM_001139511_2_+1  |
| Raly          | 3.579  | 3.713  | 3.794  | 3.992  | 3.397  | 3.202  | 3.984  | 3.755  | 3.911  | 4.285  | 19383  | RALY     | NM_001139512_2_+1  |
| Raly          | 1.676  | 2.265  | 2.094  | 1.643  | 1.341  | 0.999  | 1.745  | 1.068  | 1.850  | 1.806  | 19383  | RALY     | NM_001139513_2_+1  |
| Rbl1          | 3.206  | 3.317  | 3.574  | 3.385  | 3.851  | 3.214  | 3.389  | 3.012  | 2.807  | 2.682  | 19650  | RBL1     | NM_001139516_2_-1  |

|               |        |        |        |        |        |        |        |        |        |        |           |          |                          |
|---------------|--------|--------|--------|--------|--------|--------|--------|--------|--------|--------|-----------|----------|--------------------------|
| Zbp1          | 4.597  | 3.516  | 4.539  | 4.041  | 4.878  | 3.956  | 5.875  | 4.963  | 6.267  | 5.290  | 58203     | ZBP1     | NM_001139519_2_-_1       |
| Samhd1        | 6.865  | 6.908  | 7.792  | 7.965  | 8.142  | 8.721  | 8.435  | 8.731  | 9.854  | 9.949  | 56045     | SAMHD1   | NM_001139520_2_-_1       |
| Lrfn1         | -3.090 | -4.981 | -1.895 | -2.263 | -2.017 | -2.985 | -0.144 | -0.208 | 2.440  | 1.773  | 80749     | LRFN1    | NM_001141921_7_+_1       |
| Pln           | -4.070 | -3.694 | -4.284 | -2.305 | -4.694 | -4.858 | -4.451 | -4.878 | -4.458 | -4.557 | 18821     | NA       | NM_001141927_10_+_1      |
| Ctnnbip1      | -4.757 | -1.845 | -3.781 | -4.948 | -4.890 | -2.986 | -4.784 | -3.020 | -4.313 | -2.240 | 67087     | CTNNBIP1 | NM_001141930_4_+_1       |
| Rbms1         | 5.644  | 5.664  | 6.560  | 6.429  | 5.403  | 5.011  | 6.395  | 6.600  | 7.690  | 7.567  | 56878     | RBMS1    | NM_001141931_2_-_1       |
| Rbms1         | 4.287  | 4.479  | 4.797  | 4.954  | 4.458  | 4.247  | 5.001  | 4.888  | 5.411  | 5.493  | 56878     | RBMS1    | NM_001141932_2_-_1       |
| Mkks          | 3.530  | 3.834  | 2.671  | 2.693  | 2.610  | 2.915  | 2.439  | 2.682  | 2.073  | 1.981  | 59030     | MKKS     | NM_001141946_2_-_1       |
| Nmi           | 4.551  | 3.337  | 4.799  | 4.259  | 4.874  | 3.662  | 4.484  | 3.322  | 4.060  | 2.996  | 64685     | NMI      | NM_001141948_2_-_1       |
| Nmi           | 4.254  | 4.553  | 5.105  | 5.733  | 4.869  | 5.537  | 5.045  | 4.737  | 4.456  | 4.096  | 64685     | NMI      | NM_001141949_2_-_1       |
| Tmem80        | 3.292  | 3.199  | 1.634  | 1.999  | 2.479  | 2.649  | 2.171  | 1.900  | 1.818  | 1.557  | 71448     | TMEM80   | NM_001141950_7_+_1       |
| Naa20         | 6.346  | 6.313  | 5.437  | 5.406  | 5.435  | 5.336  | 5.697  | 5.661  | 5.153  | 5.085  | 67877     | NAA20    | NM_001141965_2_+_1       |
| Tmem230       | 3.065  | 4.326  | 1.539  | 1.052  | 1.024  | 1.969  | -0.618 | 1.883  | -1.661 | -1.044 | 70612     | TMEM230  | NM_001141971_2_-_1       |
| Tpx2          | 0.050  | -1.007 | 1.024  | 1.156  | 2.401  | 1.348  | 1.658  | -0.723 | -0.317 | -2.552 | 72119     | TPX2     | NM_001141975_2_+_1       |
| Tpx2          | -0.855 | -1.666 | 2.252  | 2.877  | 3.156  | 1.232  | 2.257  | 2.578  | 1.297  | 0.676  | 72119     | TPX2     | NM_001141976_2_+_1       |
| Tpx2          | -4.033 | -0.452 | 1.567  | 1.158  | 0.635  | 1.428  | 0.193  | 0.128  | -4.525 | -4.341 | 72119     | TPX2     | NM_001141977_2_+_1       |
| Tpx2          | -0.120 | -1.160 | 3.216  | 3.163  | 4.057  | 3.958  | 3.029  | 1.398  | 0.320  | 1.125  | 72119     | TPX2     | NM_001141978_2_+_1       |
| Rbm43         | 4.043  | 4.094  | 3.174  | 3.686  | 4.814  | 4.753  | 4.467  | 3.805  | 4.475  | 4.195  | 71684     | RBM43    | NM_001141981_2_-_1       |
| Rbm43         | 3.328  | 1.760  | 0.969  | -0.039 | 1.271  | 1.705  | 1.375  | 2.787  | 2.866  | 2.448  | 71684     | RBM43    | NM_001141982_2_-_1       |
| Golga7b       | -4.981 | -4.981 | -4.571 | -4.735 | -2.661 | -4.099 | -3.807 | -4.997 | -4.981 | -4.570 | 71146     | GOLGA7B  | NM_001141983_19_+_1      |
| Myo9b         | 2.577  | 3.212  | 3.409  | 3.446  | 4.747  | 4.653  | 4.173  | 3.557  | 4.349  | 4.076  | 17925     | MYO9B    | NM_001142322_8_+_1       |
| Myo9b         | 4.597  | 4.074  | 4.803  | 4.546  | 6.048  | 5.882  | 5.446  | 4.820  | 5.182  | 5.472  | 17925     | MYO9B    | NM_001142323_8_+_1       |
| Lmo2          | 6.991  | 7.076  | 5.533  | 5.801  | 6.480  | 6.822  | 6.520  | 6.256  | 5.985  | 6.113  | 16909     | LMO2     | NM_001142335_2_+_1       |
| Lmo2          | 4.021  | 4.164  | 0.850  | 2.079  | 2.769  | 2.960  | 2.608  | 1.519  | 2.794  | 1.464  | 16909     | LMO2     | NM_001142336_2_+_1       |
| Lmo2          | 3.659  | 4.178  | 1.371  | 2.817  | 1.284  | 3.196  | 1.871  | 3.249  | 1.557  | 1.450  | 16909     | LMO2     | NM_001142337_2_+_1       |
| Alg12         | 3.715  | 3.219  | 2.767  | 2.939  | 3.074  | 2.477  | 2.758  | 2.705  | 3.226  | 3.249  | 223774    | ALG12    | NM_001142357_15_-_1      |
| Gm14124       | -3.478 | -1.379 | -4.667 | -2.028 | -3.046 | -2.494 | -4.220 | -3.225 | -3.351 | -1.703 | 100216455 | NA       | NM_001142410_2_+_1       |
| Zfp937        | 1.350  | 2.566  | 1.152  | 2.918  | 3.020  | 2.768  | 2.788  | 2.266  | 0.769  | 2.574  | 245174    | NA       | NM_001142411_2_+_1       |
| Sap18b        | 7.501  | 7.466  | 6.844  | 6.882  | 6.985  | 7.026  | 7.256  | 7.022  | 6.167  | 6.074  | 100041953 | SAP18    | NM_001142441_14_+_1      |
| Gm9992        | -4.981 | -4.981 | -4.753 | -3.415 | -4.694 | -3.797 | -4.933 | -4.285 | -4.190 | -3.498 | 667055    | UNC93A   | NM_001142539_17_-_1      |
| Vipas39       | 5.055  | 5.119  | 5.247  | 4.911  | 4.975  | 5.025  | 4.699  | 4.774  | 5.002  | 4.965  | 104799    | VIPAS39  | NM_001142580_12_-_1      |
| Vipas39       | -4.227 | 1.477  | -0.601 | -4.802 | -0.584 | -0.918 | -0.981 | -3.652 | 1.103  | -4.730 | 104799    | VIPAS39  | NM_001142581_12_-_1      |
| Fbrsl1        | 3.044  | 2.483  | 3.129  | 2.925  | 4.920  | 4.669  | 4.417  | 3.115  | 4.065  | 3.757  | 381668    | FBRS1    | NM_001142642_5_-_1       |
| Nemp2         | 3.547  | 4.445  | 3.046  | 3.783  | 3.532  | 4.316  | 2.465  | 3.515  | 2.615  | 3.545  | 227094    | NEMP2    | NM_001142647_1_+_1       |
| Arpp19        | 6.944  | 6.814  | 6.821  | 6.746  | 7.134  | 6.826  | 7.325  | 6.819  | 5.931  | 5.854  | 59046     | ARPP19   | NM_001142655_9_+_1       |
| Chid1         | 5.231  | 5.166  | 4.494  | 4.788  | 3.815  | 4.252  | 3.966  | 4.701  | 4.700  | 4.921  | 68038     | CHID1    | NM_001142681_7_-_1       |
| Tpgs2         | 2.150  | -2.690 | -2.647 | -0.040 | -3.785 | -4.641 | -2.320 | -4.301 | -3.258 | -2.245 | 66648     | TPGS2    | NM_001142697_18_-_1      |
| Tpgs2         | -1.341 | -3.038 | -3.840 | -4.454 | -4.583 | -3.858 | -4.703 | -4.928 | -4.060 | -3.373 | 66648     | TPGS2    | NM_001142698_18_-_1      |
| Hmha1         | 6.614  | 6.625  | 7.950  | 7.838  | 8.546  | 8.459  | 8.688  | 8.629  | 9.702  | 9.550  | 70719     | ARHGAP45 | NM_001142701_10_+_1      |
| Cfb           | -4.688 | -4.981 | -4.669 | -4.883 | -1.588 | -3.827 | 0.138  | -0.057 | 0.439  | 1.045  | 14962     | CFB      | NM_001142706_17_-_1      |
| 1110065P20Rik | 3.782  | 3.487  | 3.266  | 3.418  | 3.224  | 3.629  | 3.373  | 3.157  | 2.908  | 2.641  | 68920     | NA       | NM_001142727_4_-_1       |
| Lrrc9         | -4.981 | -4.981 | -4.981 | -4.981 | -4.966 | -4.658 | -4.981 | -4.981 | -4.981 | -4.981 | 78257     | NA       | NM_001142728_12_+_1      |
| Lrrc9         | -1.520 | -2.077 | -4.177 | -2.675 | -4.478 | -2.827 | -4.957 | -3.525 | -4.981 | -2.407 | 78257     | NA       | NM_001142729_12_+_1      |
| Kctd1         | -0.799 | -1.244 | -0.286 | -0.255 | -1.383 | -1.861 | -1.612 | -1.096 | -0.780 | -0.476 | 106931    | KCTD1    | NM_001142731_18_-_1      |
| TtlI3         | -0.845 | 0.320  | 0.276  | -0.929 | -0.401 | -1.215 | -0.092 | -1.217 | 1.416  | 0.196  | 101100    | TTLI3    | NM_001142732_6_+_1       |
| Gm8994        | -4.981 | -4.981 | -3.357 | -4.280 | -4.701 | -4.651 | -4.715 | -4.961 | -3.589 | -4.981 | 668137    | NA       | NM_001142734_6_+_1       |
| Atat1         | 2.118  | 2.797  | 2.792  | 2.626  | 3.161  | 3.129  | 2.724  | 2.924  | 1.782  | 2.438  | 73242     | ATAT1    | NM_001142744_17_-_1      |
| Atat1         | -4.854 | -4.981 | -4.622 | -2.895 | -4.680 | -4.815 | -3.173 | -4.782 | -4.817 | -3.445 | 73242     | ATAT1    | NM_001142745_17_-_1      |
| Fam188b       | -0.931 | 0.325  | -1.803 | -1.423 | -4.247 | -2.877 | -4.815 | -1.749 | -0.648 | 0.580  | 330323    | FAM188B  | NM_001142781_6_+_1       |
| Tmem150b      | -4.981 | -4.981 | 2.519  | 2.394  | 3.309  | 3.168  | 3.271  | 2.768  | 2.559  | 2.086  | 330460    | TMEM150B | NM_001142792_7_-_1       |
| Slc6a8        | -3.515 | -3.646 | -3.465 | -4.087 | -3.096 | -2.600 | -2.645 | -4.321 | -4.981 | -3.635 | 102857    | SLC6A8   | NM_001142809_X_+_1       |
| Slc6a8        | -3.412 | -3.252 | -3.341 | -3.113 | -3.575 | -2.752 | -3.175 | -4.071 | -4.981 | -3.102 | 102857    | SLC6A8   | NM_001142810_X_+_1       |
| Plod2         | 2.548  | 2.629  | -4.449 | -4.862 | -4.608 | -4.947 | -4.595 | -4.963 | -4.981 | -4.981 | 26432     | PLOD2    | NM_001142916_9_+_1       |
| Tcf7l2        | -1.069 | -1.374 | -2.958 | -2.066 | -3.442 | -3.023 | -2.707 | -2.774 | -3.960 | -0.998 | 21416     | TCF7L2   | NM_001142918_19_+_1      |
| Tcf7l2        | -3.079 | -2.413 | -1.988 | -0.958 | -1.702 | -2.483 | -1.158 | -3.107 | 0.229  | -1.049 | 21416     | TCF7L2   | NM_001142919_19_+_1      |
| Tcf7l2        | 3.801  | 3.819  | 3.506  | 3.224  | 2.977  | 3.256  | 3.020  | 2.565  | 1.703  | 1.912  | 21416     | TCF7L2   | NM_001142920_19_+_1      |
| Tcf7l2        | 2.548  | 0.718  | 1.172  | 0.801  | -0.311 | -0.817 | 1.576  | -0.349 | 0.027  | 1.620  | 21416     | TCF7L2   | NM_001142921_19_+_1      |
| Tcf7l2        | 1.064  | -0.027 | -0.208 | -0.039 | 0.626  | 1.217  | 1.227  | 0.613  | 1.192  | 1.598  | 21416     | TCF7L2   | NM_001142922_19_+_1      |
| Tcf7l2        | 3.598  | 3.446  | 3.206  | 2.999  | 1.822  | 2.499  | 2.665  | 2.365  | 1.483  | 1.428  | 21416     | TCF7L2   | NM_001142923_19_+_1      |
| Tcf7l2        | -4.798 | -3.661 | -1.936 | -3.603 | -2.653 | -4.151 | -4.156 | -4.116 | -4.733 | -0.793 | 21416     | TCF7L2   | NM_001142924_19_+_1      |
| Moap1         | 2.967  | 3.000  | 2.700  | 1.658  | 2.722  | 2.837  | 2.586  | 1.347  | 0.823  | 1.390  | 64113     | MOAP1    | NM_001142937_12_-_1      |
| AK010878      | 4.806  | 4.910  | 4.043  | 3.683  | 3.873  | 3.973  | 4.037  | 4.015  | 3.364  | 3.286  | 100233175 | GON7     | NM_001142938_12_-_1      |
| Gm20604       | 1.299  | 2.343  | 3.419  | 3.495  | 2.601  | 2.492  | 1.371  | 2.993  | 3.244  | 3.024  | 100859931 | NA       | NM_001142939_12_-_1      |
| Zfp949        | 3.387  | 3.733  | 3.488  | 3.459  | 3.547  | 3.080  | 3.616  | 3.411  | 3.386  | 3.670  | 71640     | NA       | NM_001142943_9_+_1       |
| Pogk          | 1.562  | 1.629  | 0.662  | -0.981 | 1.239  | 1.453  | 0.815  | 0.436  | 1.489  | 0.608  | 71592     | POGK     | NM_001142948_1_-_1       |
| Nars          | 6.424  | 6.414  | 7.150  | 6.747  | 6.513  | 6.169  | 6.512  | 6.575  | 6.519  | 6.067  | 70223     | NARS     | NM_001142950_18_-_1      |
| Fam46c        | 5.676  | 4.775  | 6.532  | 6.776  | 6.070  | 6.082  | 4.867  | 5.286  | 0.740  | 1.865  | 74645     | FAM46C   | NM_001142952_3_-_1       |
| Zfp955b       | 3.552  | 3.082  | 3.052  | 2.636  | 3.364  | 2.758  | 3.200  | 2.835  | 3.367  | 3.172  | 100043468 | NA       | NM_001142957_17_+_1      |
| Bcl2l15       | -4.981 | -1.144 | -3.821 | -0.337 | -3.662 | 3.827  | -3.745 | 1.457  | -3.088 | -2.976 | 229672    | BCL2L15  | NM_001142959_3_+_1       |
| Bcl2l15       | -3.189 | -2.883 | -2.319 | -2.823 | 1.302  | 2.491  | 0.332  | 0.115  | -4.130 | -3.999 | 229672    | BCL2L15  | NM_001142960_3_+_1       |
| Gm10778       | 2.890  | 2.970  | 2.354  | 2.806  | 3.196  | 2.895  | 3.047  | 2.832  | 2.881  | 2.992  | 100233208 | NA       | NM_001142963_10_+_1      |
| Gm10778       | -3.807 | -3.349 | -2.658 | -1.567 | -2.315 | -4.479 | -2.819 | -4.151 | -3.892 | -2.634 | 100233208 | NA       | NM_001142963_dup1_10_+_1 |
| Mpped2        | -4.981 | -4.981 | -4.981 | -4.981 | -4.811 | -4.964 | -4.981 | -4.981 | -4.948 | -4.981 | 77015     | MPPED2   | NM_001143683_2_+_1       |
| Apol11b       | -4.981 | -4.981 | -1.442 | -0.630 | -2.897 | -0.836 | -1.904 | -0.933 | -2.659 | -2.993 | 328563    | NA       | NM_001143686_15_-_1      |

|               |        |        |        |        |        |        |        |        |        |        |           |              |                     |
|---------------|--------|--------|--------|--------|--------|--------|--------|--------|--------|--------|-----------|--------------|---------------------|
| H2-Q4         | 4.991  | 4.334  | 4.665  | 4.843  | 4.590  | 4.313  | 4.508  | 4.141  | 4.012  | 3.079  | 15015     | HLA-A        | NM_001143689_17_+_1 |
| Lrrc27        | -2.842 | -4.981 | -3.050 | -4.940 | -4.737 | -4.643 | -3.747 | -4.352 | -2.076 | -4.981 | 76612     | LRRC27       | NM_001143755_7_+_1  |
| Syce1         | -0.470 | -0.302 | -2.169 | -1.877 | -1.624 | -3.073 | -2.650 | -2.444 | -2.871 | -4.316 | 74075     | SYCE1        | NM_001143765_7_-_1  |
| Ctc1          | -0.038 | -0.018 | 1.516  | 1.042  | 3.029  | 2.897  | 2.048  | 2.404  | 2.949  | 1.871  | 68964     | CTC1         | NM_001143790_11_+_1 |
| Fam196a       | -4.981 | -1.991 | -1.512 | -1.025 | -2.131 | 0.356  | 0.388  | 0.243  | 0.978  | 1.395  | 627214    | FAM196A      | NM_001143802_7_-_1  |
| Grm5          | -1.227 | -1.726 | -4.651 | -4.990 | -4.702 | -4.985 | -4.508 | -4.947 | -4.088 | -4.981 | 108071    | GRM5         | NM_001143834_7_+_1  |
| Pde2a         | -4.143 | -3.809 | -3.872 | -2.172 | -2.478 | -0.151 | -1.796 | 1.279  | 2.237  | 3.203  | 207728    | PDE2A        | NM_001143848_7_+_1  |
| Pde2a         | 0.358  | 1.712  | 0.538  | 1.763  | 1.783  | 3.463  | 0.652  | 5.482  | 4.218  | 6.647  | 207728    | PDE2A        | NM_001143849_7_+_1  |
| Ppfia4        | 6.707  | 8.341  | 6.334  | 7.135  | 6.790  | 7.530  | 6.516  | 7.391  | 5.682  | 7.573  | 68507     | NA           | NM_001144855_1_-_1  |
| Spg20         | 0.460  | -1.215 | 0.310  | 0.794  | -1.132 | -0.192 | -0.949 | 0.016  | 0.583  | 0.358  | 229285    | NA           | NM_001144987_3_+_1  |
| Spg20         | 2.255  | 2.228  | 2.144  | 0.537  | 1.054  | 0.689  | 1.354  | 1.636  | 2.102  | 1.912  | 229285    | NA           | NM_001144988_3_+_1  |
| Gm13889       | -3.563 | -4.981 | -3.044 | -3.383 | -4.307 | -3.448 | -4.161 | -2.570 | -3.925 | -3.209 | 620695    | C11orf96     | NM_001145034_2_-_1  |
| Btbd18        | -4.981 | -4.981 | -3.632 | -3.974 | -3.777 | -4.843 | -4.100 | -3.511 | -4.981 | -2.763 | 100270744 | BTBD18       | NM_001145100_2_+_1  |
| Ube2ql1       | -0.507 | -4.981 | -4.243 | -4.955 | -2.608 | -4.971 | -3.700 | -4.933 | -4.981 | -4.981 | 76980     | UBE2QL1      | NM_001145162_13_-_1 |
| Tgtp2         | 5.971  | 4.457  | 6.331  | 5.583  | 6.987  | 6.314  | 7.159  | 6.272  | 5.760  | 4.153  | 100039796 | NA           | NM_001145164_11_-_1 |
| 150009L16Rik  | 0.067  | 0.227  | -1.186 | -1.227 | -1.085 | -1.752 | -2.669 | -3.120 | -4.981 | -4.981 | 69784     | NA           | NM_001145198_10_+_1 |
| Hbs1l         | 4.521  | 4.121  | 4.520  | 4.119  | 3.571  | 3.244  | 3.604  | 3.634  | 3.972  | 4.193  | 56422     | HBS1L        | NM_001145209_10_+_1 |
| 6430550D23Rik | -0.551 | 1.556  | -1.563 | -1.527 | -4.945 | -1.535 | -2.266 | -0.728 | -2.590 | -1.898 | 320095    | C20orf173    | NM_001145351_2_-_1  |
| 6430550D23Rik | -2.362 | -4.890 | -1.767 | -3.733 | -3.505 | -2.918 | -4.168 | -4.967 | -3.502 | -2.632 | 320095    | C20orf173    | NM_001145352_2_-_1  |
| Gm9047        | -4.981 | -2.340 | -3.758 | -4.217 | -4.755 | -4.222 | -4.968 | -3.668 | -2.720 | -3.758 | 668210    | LOC100130705 | NM_001145360_6_+_1  |
| Sult6b2       | -3.843 | -3.267 | -4.937 | -4.465 | -3.405 | -4.156 | -4.923 | -4.349 | -4.981 | -4.981 | 330440    | NA           | NM_001145390_6_-_1  |
| Kcnt1         | -4.981 | -4.981 | -4.978 | -4.933 | -4.930 | -4.915 | -4.972 | -4.781 | -4.981 | -4.981 | 227632    | KCNT1        | NM_001145403_2_+_1  |
| Smim20        | 7.559  | 7.649  | 5.691  | 5.564  | 6.028  | 6.075  | 5.970  | 5.881  | 5.760  | 5.278  | 66278     | SMIM20       | NM_001145433_5_+_1  |
| Arhgef33      | -0.261 | -0.145 | -2.518 | -3.603 | -2.899 | -3.364 | -2.026 | -3.402 | -3.322 | -4.227 | 381112    | ARHGEF33     | NM_001145452_17_+_1 |
| Borcs8        | 5.977  | 5.898  | 5.128  | 5.344  | 5.089  | 5.195  | 5.219  | 4.826  | 4.147  | 4.228  | 72368     | BORCS8       | NM_001145552_8_+_1  |
| Rfx8          | -0.427 | 2.579  | -4.971 | -4.971 | -4.966 | -4.966 | -4.903 | -4.158 | -4.981 | -4.981 | 619289    | RFX8         | NM_001145660_1_-_1  |
| 2210408121Rik | -4.981 | -1.322 | -1.932 | -0.450 | -1.961 | -1.601 | -3.727 | -0.037 | -0.532 | -0.532 | 72371     | KIAA0825     | NM_001145676_13_+_1 |
| Zkscan3       | 4.711  | 5.187  | 4.330  | 4.847  | 4.697  | 4.951  | 4.502  | 4.784  | 4.288  | 4.347  | 72739     | ZKSCAN3      | NM_001145778_13_-_1 |
| Kif2a         | 3.217  | 3.305  | 4.224  | 4.983  | 3.302  | 3.556  | 3.198  | 3.738  | 3.298  | 3.890  | 16563     | KIF2A        | NM_001145779_13_-_1 |
| Use1          | 2.864  | 2.983  | 2.796  | 2.683  | 2.489  | 2.366  | 2.094  | 1.888  | 0.773  | 0.009  | 67023     | USE1         | NM_001145780_8_+_1  |
| Acbd6         | 2.245  | 1.548  | 1.648  | 1.136  | 1.553  | 0.895  | 1.040  | 0.425  | 0.483  | 0.653  | 72482     | ACBD6        | NM_001145781_1_+_1  |
| Ctla2a        | -3.987 | -0.828 | -0.624 | -0.607 | -1.828 | -1.158 | -1.328 | 0.783  | -0.008 | 0.554  | 13024     | NA           | NM_001145799_13_-_1 |
| Igsf9         | 2.626  | 1.851  | 1.879  | 1.983  | -0.341 | -1.120 | 0.475  | 0.848  | -1.286 | -0.902 | 93842     | IGSF9        | NM_001145800_1_+_1  |
| Ctla2b        | 0.340  | -0.708 | 5.215  | 5.367  | -1.120 | -1.330 | 0.026  | -0.140 | -0.891 | -0.391 | 13025     | NA           | NM_001145801_13_-_1 |
| Mak           | -4.981 | -2.493 | -4.950 | -4.244 | -4.418 | -4.933 | -4.977 | -4.922 | -4.914 | -1.423 | 17152     | MAK          | NM_001145802_13_-_1 |
| Mak           | -4.981 | -4.724 | -4.980 | -4.962 | -4.937 | -4.946 | -4.980 | -4.981 | -4.816 | -1.861 | 17152     | MAK          | NM_001145803_13_-_1 |
| Nucks1        | 3.572  | 3.522  | 3.741  | 3.675  | 3.791  | 3.686  | 3.528  | 3.371  | 3.178  | 3.305  | 98415     | NUCKS1       | NM_001145804_1_+_1  |
| Gpd2          | 3.074  | 2.857  | 3.797  | 3.600  | 3.758  | 3.653  | 3.974  | 2.768  | 2.836  | 3.090  | 14571     | GPD2         | NM_001145820_2_+_1  |
| Ggta1         | -0.621 | 0.650  | 2.246  | 2.722  | 2.236  | 2.294  | 3.395  | 2.343  | 3.371  | 3.632  | 14594     | NA           | NM_001145821_2_-_1  |
| Hipk3         | 2.892  | 3.479  | 3.337  | 2.036  | 2.480  | 2.976  | 3.299  | 1.284  | 3.706  | 4.061  | 15259     | HIPK3        | NM_001145824_2_-_1  |
| Specc1l       | -3.572 | -3.129 | -1.114 | -2.655 | -3.208 | -1.636 | -1.892 | -1.247 | -3.880 | -4.107 | 74392     | SPECC1L      | NM_001145826_10_+_1 |
| Stk40         | -4.533 | -4.294 | -0.743 | -2.692 | -0.632 | -0.197 | -0.510 | -1.532 | 1.027  | 0.980  | 74178     | STK40        | NM_001145827_4_+_1  |
| Plcb1         | -3.242 | -4.981 | -4.791 | -3.308 | -4.871 | -3.280 | -1.910 | -0.093 | 5.496  | 5.683  | 18795     | PLCB1        | NM_001145830_2_+_1  |
| Kifc3         | -2.565 | -0.468 | -3.826 | -3.620 | -2.287 | -2.765 | -1.714 | -0.927 | 2.698  | 3.005  | 16582     | KIFC3        | NM_001145831_8_-_1  |
| Kifc3         | -2.151 | 0.229  | -1.067 | -2.335 | -3.666 | -1.659 | 0.402  | -0.632 | 1.663  | 2.222  | 16582     | KIFC3        | NM_001145832_8_-_1  |
| Ralgds        | 0.372  | -0.618 | -3.022 | -1.397 | -2.143 | -1.241 | -1.949 | -2.900 | -2.446 | -4.623 | 19730     | RALGDS       | NM_001145834_2_+_1  |
| Ralgds        | -1.942 | -0.068 | 0.474  | 1.115  | 2.428  | 2.142  | 2.554  | 2.700  | 1.784  | 0.819  | 19730     | RALGDS       | NM_001145835_2_+_1  |
| Ralgds        | 1.719  | 0.345  | 0.404  | 0.656  | 1.289  | 0.352  | 2.077  | 2.332  | -2.033 | 1.058  | 19730     | RALGDS       | NM_001145836_2_+_1  |
| Lrp4          | -0.502 | -0.069 | -3.970 | -4.616 | -4.680 | -4.520 | -2.836 | -2.558 | 0.613  | -0.461 | 228357    | LRP4         | NM_001145857_2_+_1  |
| Sh3bp2        | 5.295  | 4.887  | 4.548  | 4.669  | 5.101  | 5.056  | 5.750  | 5.896  | 6.642  | 6.599  | 24055     | SH3BP2       | NM_001145858_5_+_1  |
| Sh3bp2        | -2.234 | -4.665 | -3.766 | -3.573 | -2.563 | -1.421 | -2.600 | -4.873 | -4.502 | -1.959 | 24055     | SH3BP2       | NM_001145859_5_+_1  |
| Gm14139       | -4.981 | -1.005 | -4.943 | -1.376 | -4.880 | -1.391 | -4.982 | -2.280 | -4.981 | -2.230 | 100271882 | NA           | NM_001145863_2_+_1  |
| Adtrp         | -3.344 | -2.791 | -4.564 | -4.836 | -4.607 | -4.873 | -4.167 | -4.722 | -4.060 | -4.475 | 109254    | ADTRP        | NM_001145875_13_-_1 |
| Slc25a44      | -2.060 | 0.826  | 1.184  | 0.242  | 0.310  | 0.577  | 1.414  | 1.429  | 2.328  | 1.974  | 229517    | SLC25A44     | NM_001145876_3_-_1  |
| Slc25a44      | 2.100  | 1.172  | 1.290  | 1.833  | 1.484  | 1.223  | 1.944  | 1.208  | 2.971  | 2.800  | 229517    | SLC25A44     | NM_001145877_3_-_1  |
| Zfp790        | 1.437  | 1.565  | 1.925  | 0.942  | 0.449  | 1.404  | 0.335  | 0.795  | 1.267  | -0.016 | 233056    | ZNF790       | NM_001145880_7_+_1  |
| Zfp212        | 1.030  | 1.414  | 1.274  | -1.539 | 0.345  | 0.996  | 1.049  | 0.853  | 1.148  | 0.629  | 232784    | ZNF212       | NM_001145881_6_+_1  |
| Itgb5         | 2.171  | 1.012  | 1.620  | 2.219  | 2.040  | 1.633  | 5.080  | 6.474  | 6.800  | 7.814  | 16419     | ITGB5        | NM_001145884_16_+_1 |
| Ddx4          | -3.775 | -4.981 | -4.339 | -4.689 | -4.525 | -3.789 | -4.703 | -4.801 | -3.974 | -4.528 | 13206     | DDX4         | NM_001145885_13_-_1 |
| Tiam1         | -4.058 | -3.139 | -0.827 | 0.197  | 0.205  | -2.050 | -1.256 | -1.436 | 1.503  | 2.504  | 21844     | TIAM1        | NM_001145886_16_-_1 |
| Tiam1         | -3.563 | -1.577 | -1.637 | -3.262 | -4.941 | -3.568 | -3.873 | -3.592 | 0.262  | -1.987 | 21844     | TIAM1        | NM_001145887_16_-_1 |
| Zfat          | -0.623 | -0.019 | 0.208  | 0.267  | -0.733 | -0.555 | -0.602 | -0.757 | 0.796  | 1.728  | 380993    | ZFAT         | NM_001145888_15_-_1 |
| Nat8f4        | -4.981 | -4.981 | -3.650 | -4.973 | -4.973 | -3.183 | -2.626 | -4.961 | -4.948 | -4.981 | 75541     | NA           | NM_001145895_6_-_1  |
| Gse1          | -4.270 | -4.123 | 0.291  | -0.664 | 0.498  | 0.563  | -0.613 | -0.052 | 1.410  | 0.456  | 382034    | GSE1         | NM_001145896_8_+_1  |
| Gse1          | -4.015 | -4.015 | -3.481 | -4.662 | -4.865 | -3.408 | -3.929 | -4.832 | -3.722 | 0.588  | 382034    | GSE1         | NM_001145897_8_+_1  |
| BC052040      | -3.916 | -4.101 | -3.495 | -4.694 | -2.806 | -4.861 | -4.409 | -4.864 | -4.752 | -2.125 | 399568    | C15orf41     | NM_001145898_2_+_1  |
| Slc15a2       | -1.051 | -4.981 | -2.174 | -4.900 | -1.218 | -4.781 | -2.442 | -4.588 | -4.981 | -4.981 | 57738     | SLC15A2      | NM_001145899_16_-_1 |
| Btbd6         | 2.535  | 2.102  | 2.311  | 2.170  | 2.226  | 2.187  | 0.919  | 1.754  | 0.839  | 1.795  | 399566    | BTBD6        | NM_001145900_12_+_1 |
| Arhgap1       | 2.898  | 2.415  | 3.125  | 2.935  | 2.738  | 1.483  | 3.691  | 2.986  | 3.978  | 4.319  | 228359    | ARHGAP1      | NM_001145902_2_+_1  |
| Ythdf3        | 4.059  | 4.377  | 5.434  | 5.305  | 5.016  | 5.192  | 5.206  | 4.868  | 4.928  | 6.438  | 229096    | YTHDF3       | NM_001145919_3_+_1  |
| Runx2         | 7.212  | 7.262  | 2.849  | 2.934  | 2.737  | 2.860  | 3.490  | 3.517  | 3.367  | 3.164  | 12393     | RUNX2        | NM_001145920_17_-_1 |
| Arhgef40      | -3.954 | -4.981 | 0.441  | 0.974  | -0.474 | -0.972 | -0.629 | 0.542  | -2.908 | -4.981 | 268739    | ARHGEF40     | NM_001145921_14_+_1 |
| Arhgef40      | -3.814 | -4.981 | -4.557 | -4.922 | -4.775 | -3.635 | -4.725 | -4.460 | -2.092 | -4.981 | 268739    | ARHGEF40     | NM_001145922_14_+_1 |
| Msantd3       | -4.873 | -4.981 | -4.774 | -3.991 | -4.926 | -4.970 | -4.840 | -3.343 | 0.519  | -0.540 | 66665     | MSANTD3      | NM_001145924_4_+_1  |

|               |        |        |        |        |        |        |        |        |        |        |        |          |                     |
|---------------|--------|--------|--------|--------|--------|--------|--------|--------|--------|--------|--------|----------|---------------------|
| Msantd3       | -3.496 | -4.981 | -0.713 | -2.016 | -2.998 | -2.123 | -0.874 | -0.766 | -0.916 | -0.665 | 66665  | MSANTD3  | NM_001145925_4_+_1  |
| Pianp         | -4.049 | -0.800 | 1.918  | 1.587  | -4.862 | -0.002 | -2.161 | -0.004 | -4.139 | -1.034 | 319352 | PIANP    | NM_001145926_6_+_1  |
| Pianp         | -3.772 | 0.970  | 4.420  | 3.878  | -4.722 | 2.466  | -0.135 | 2.749  | -2.884 | 1.011  | 319352 | PIANP    | NM_001145927_6_+_1  |
| Thap3         | 5.311  | 5.054  | 3.306  | 2.988  | 3.925  | 3.899  | 3.545  | 3.278  | 2.949  | 2.386  | 69876  | THAP3    | NM_001145929_4_-_1  |
| Yeats2        | 0.908  | 2.377  | 3.234  | 3.328  | 2.979  | 2.532  | 2.843  | 1.585  | 2.883  | 3.140  | 208146 | YEATS2   | NM_001145930_16_+_1 |
| Yeats2        | -0.816 | -0.895 | 0.436  | -1.017 | -0.513 | -1.442 | -1.101 | -1.863 | -2.350 | -2.763 | 208146 | YEATS2   | NM_001145931_16_+_1 |
| Zfp691        | -0.439 | 4.243  | -3.502 | -0.425 | -3.203 | 0.113  | -2.599 | -0.256 | -2.094 | 1.263  | 195522 | ZNF691   | NM_001145935_4_-_1  |
| Zfp691        | 0.306  | 3.865  | -1.759 | 0.684  | -3.265 | 0.017  | -1.763 | 0.984  | -0.435 | 1.470  | 195522 | ZNF691   | NM_001145936_4_-_1  |
| Tenm3         | 0.629  | 1.593  | -4.981 | -4.981 | -4.981 | -4.981 | -4.972 | -4.977 | -4.981 | -4.981 | 23965  | TENM3    | NM_001145937_8_-_1  |
| Bace1         | 1.264  | 1.477  | 0.857  | 0.778  | 1.322  | 0.312  | 1.867  | 1.278  | 1.997  | 1.000  | 23821  | BACE1    | NM_001145947_9_+_1  |
| Ttc39a        | 1.944  | 2.935  | 3.674  | 3.766  | -1.117 | 0.740  | -0.535 | -0.768 | -2.001 | -2.729 | 230603 | TTC39A   | NM_001145948_4_+_1  |
| 5730409E04Rik | 1.570  | 0.869  | 1.702  | 1.147  | -0.903 | 0.848  | -0.945 | -0.769 | 0.174  | 0.664  | 230757 | C1orf216 | NM_001145950_4_+_1  |
| Lpp           | -2.640 | 1.893  | -1.970 | -1.011 | -2.734 | 0.569  | 0.413  | 0.720  | -3.680 | -0.635 | 210126 | LPP      | NM_001145952_16_+_1 |
| Lgals3        | 5.132  | 8.041  | 8.931  | 7.802  | 6.311  | 6.360  | 8.114  | 8.109  | 9.792  | 9.289  | 16854  | LGALS3   | NM_001145953_14_+_1 |
| Lpp           | -4.814 | -4.269 | -4.833 | -4.926 | -2.480 | -3.995 | -4.502 | -4.956 | -4.833 | -4.765 | 210126 | LPP      | NM_001145954_16_+_1 |
| Pigv          | -1.340 | -1.494 | -2.484 | -4.689 | -1.113 | -3.810 | 0.258  | -4.639 | 0.557  | -4.645 | 230801 | PIGV     | NM_001145955_4_-_1  |
| Pigv          | 3.466  | 3.222  | 1.859  | 1.296  | 2.758  | 2.624  | 3.102  | 2.092  | 2.763  | 2.216  | 230801 | PIGV     | NM_001145956_4_-_1  |
| Vwa5a         | 3.489  | 3.840  | 3.549  | 4.385  | 3.707  | 3.248  | 3.406  | 4.379  | 5.835  | 6.224  | 67776  | VWA5A    | NM_001145957_9_+_1  |
| Crocc         | 0.038  | -0.039 | 0.630  | 0.022  | 0.650  | -1.372 | 1.050  | -0.872 | 0.881  | 0.164  | 230872 | CROCC    | NM_001145958_4_-_1  |
| Ndrg2         | -1.016 | -1.343 | -1.111 | -1.729 | -2.522 | -1.954 | -2.059 | 0.119  | -0.845 | -0.479 | 29811  | NDRG2    | NM_001145959_14_-_1 |
| Slc37a2       | 1.260  | 1.268  | 0.195  | -2.835 | -4.486 | -2.053 | -0.756 | -3.882 | 0.338  | -1.760 | 56857  | SLC37A2  | NM_001145960_9_-_1  |
| Atg4c         | 1.038  | 0.321  | 0.747  | 0.179  | 2.396  | 1.137  | 3.139  | 1.907  | 4.227  | 4.242  | 242557 | ATG4C    | NM_001145967_4_+_1  |
| Rwdd2a        | 1.993  | 1.989  | 0.289  | -0.078 | 0.206  | -2.002 | 1.286  | -0.251 | 1.251  | 1.530  | 69519  | RWDD2A   | NM_001145968_9_+_1  |
| Rwdd2a        | 3.763  | 3.180  | 1.120  | 0.766  | 1.837  | 1.740  | 2.898  | 2.198  | 4.090  | 3.731  | 69519  | RWDD2A   | NM_001145969_9_+_1  |
| Map7d1        | 6.283  | 6.523  | 4.345  | 4.122  | 5.431  | 5.059  | 5.443  | 5.111  | 5.579  | 5.373  | 245877 | MAP7D1   | NM_001145970_4_-_1  |
| Adgrg5        | 2.896  | 6.463  | 5.738  | 6.353  | 7.448  | 9.122  | 6.488  | 7.830  | 1.868  | 7.749  | 382045 | ADGRG5   | NM_001145972_8_+_1  |
| Parp4         | 3.819  | 3.914  | 4.868  | 4.669  | 4.502  | 4.548  | 4.049  | 3.426  | 3.462  | 3.549  | 328417 | PARP4    | NM_001145978_14_+_1 |
| Gtpbp2        | 3.615  | 4.211  | 3.035  | 2.630  | 3.600  | 2.848  | 3.489  | 3.131  | 2.530  | 2.458  | 56055  | GTPBP2   | NM_001145979_17_+_1 |
| Zfp710        | 3.640  | 2.887  | 5.165  | 5.188  | 4.395  | 4.886  | 5.192  | 4.877  | 5.914  | 5.947  | 209225 | ZNF710   | NM_001145999_7_+_1  |
| Zfp710        | -2.245 | 0.933  | 1.974  | 0.438  | 2.221  | -0.815 | 1.819  | -1.431 | 2.314  | -0.590 | 209225 | ZNF710   | NM_001146000_7_+_1  |
| Pdzk1         | -0.128 | -0.542 | -0.238 | -0.203 | -0.005 | -0.318 | -1.035 | -0.698 | -0.093 | 0.145  | 59020  | PDZK1    | NM_001146001_3_+_1  |
| CSar2         | -4.981 | -3.536 | -3.647 | -1.139 | -0.400 | 0.156  | -0.218 | 0.863  | 1.783  | 2.981  | 319430 | CSAR2    | NM_001146005_7_-_1  |
| Trim12c       | 5.508  | -2.686 | 5.395  | -1.390 | 5.582  | -1.438 | 4.976  | -4.341 | 3.847  | -3.979 | 319236 | TRIM5    | NM_001146007_7_-_1  |
| Fchsd2        | 4.318  | 4.407  | 6.094  | 6.265  | 5.300  | 5.111  | 4.525  | 4.781  | 2.913  | 2.930  | 207278 | FCHSD2   | NM_001146010_7_+_1  |
| R3hcc1        | 2.483  | 3.083  | 1.600  | 2.636  | 1.756  | 1.857  | 1.201  | 1.926  | 0.482  | 1.665  | 71843  | NA       | NM_001146012_14_-_1 |
| Lrrc18        | -4.981 | -4.803 | -2.096 | -3.858 | -4.267 | -3.737 | -4.657 | -4.862 | -3.962 | -4.981 | 67580  | LRRC18   | NM_001146021_14_+_1 |
| Wdfy4         | 4.911  | 4.729  | 9.531  | 9.458  | 8.665  | 8.761  | 7.406  | 7.464  | 5.840  | 6.220  | 545030 | WDFY4    | NM_001146022_14_-_1 |
| Fam98c        | 5.994  | 6.090  | 5.707  | 5.676  | 5.821  | 5.817  | 5.486  | 5.419  | 4.950  | 4.683  | 73833  | FAM98C   | NM_001146023_7_-_1  |
| Zfp444        | 3.759  | 3.443  | 3.155  | 3.035  | 3.451  | 3.667  | 2.806  | 3.078  | 2.110  | 2.754  | 72667  | ZNF444   | NM_001146024_7_+_1  |
| Rnf44         | 2.281  | 2.053  | 3.368  | 2.351  | 3.103  | 3.088  | 3.061  | 2.609  | 2.833  | 2.711  | 105239 | RNF44    | NM_001146025_13_-_1 |
| Rnf44         | -4.169 | -3.671 | -0.180 | -2.843 | -0.713 | -0.217 | -1.625 | -4.333 | 0.413  | 0.881  | 105239 | RNF44    | NM_001146026_13_-_1 |
| Rnf44         | 2.326  | 3.209  | 2.966  | 2.049  | 2.903  | 2.953  | 2.635  | 2.974  | 3.770  | 3.215  | 105239 | RNF44    | NM_001146027_13_-_1 |
| Nrcam         | -4.981 | -3.542 | -4.120 | -4.600 | -2.964 | -3.188 | -4.354 | -4.708 | -3.831 | -4.377 | 319504 | NRCAM    | NM_001146031_12_+_1 |
| Runx2         | 5.362  | 5.042  | -0.094 | -0.192 | 3.243  | 2.756  | 2.450  | 2.457  | -0.636 | 1.086  | 12393  | RUNX2    | NM_001146038_17_-_1 |
| Gfm2          | 0.115  | 1.424  | 1.679  | 1.150  | 1.825  | 1.288  | 0.418  | 1.592  | 1.983  | 2.099  | 320806 | GFM2     | NM_001146043_13_+_1 |
| Fam169a       | -1.727 | -1.791 | -1.789 | -2.326 | -2.580 | -1.047 | -1.355 | -2.705 | -1.290 | -1.635 | 320557 | FAM169A  | NM_001146045_13_+_1 |
| Lrrc49        | -1.296 | 0.113  | -0.699 | -0.149 | -1.688 | -1.060 | -0.895 | -1.161 | 1.058  | 1.149  | 102747 | LRRC49   | NM_001146046_9_-_1  |
| Lrrc49        | -1.211 | -4.308 | -2.718 | -3.123 | -3.771 | -4.506 | -3.290 | -2.253 | -0.880 | 0.353  | 102747 | LRRC49   | NM_001146047_9_-_1  |
| Lrrc1         | 2.675  | 2.712  | 4.641  | 3.659  | 0.035  | -0.345 | 0.816  | 1.959  | -1.033 | 0.000  | 214345 | LRRC1    | NM_001146048_9_-_1  |
| Htatip2       | -0.374 | 1.309  | 0.467  | 0.169  | 0.072  | 0.144  | -0.287 | 0.321  | 0.761  | 0.142  | 53415  | HTATIP2  | NM_001146049_7_+_1  |
| Htatip2       | 3.098  | 3.058  | 1.730  | 2.454  | 1.780  | 1.193  | 1.442  | 2.305  | 1.783  | 2.534  | 53415  | HTATIP2  | NM_001146050_7_+_1  |
| Htatip2       | 3.082  | 3.672  | 2.818  | 3.236  | 2.344  | 2.495  | 2.519  | 2.802  | 3.656  | 3.516  | 53415  | HTATIP2  | NM_001146052_7_+_1  |
| Htatip2       | 2.002  | 2.906  | 1.668  | 2.085  | 1.002  | 0.983  | 1.647  | -0.604 | 1.412  | 1.164  | 53415  | HTATIP2  | NM_001146053_7_+_1  |
| Acot7         | -0.287 | 0.672  | 0.320  | 0.381  | 0.269  | 1.002  | 0.837  | 0.323  | 0.635  | -0.531 | 70025  | ACOT7    | NM_001146057_4_+_1  |
| Acot7         | 2.569  | 1.828  | 4.573  | 4.928  | 6.300  | 6.333  | 5.683  | 4.770  | 4.396  | 4.277  | 70025  | ACOT7    | NM_001146058_4_+_1  |
| Als2cl        | -4.137 | -3.575 | 2.808  | 2.154  | 2.641  | 2.321  | 0.763  | 1.291  | 0.915  | 0.974  | 235633 | ALS2CL   | NM_001146059_9_+_1  |
| Als2cl        | -4.509 | -4.068 | 1.511  | 1.328  | -1.016 | -2.977 | 1.619  | -3.369 | -2.827 | -3.699 | 235633 | ALS2CL   | NM_001146060_9_+_1  |
| Hexdc         | 1.086  | 1.616  | 0.920  | 0.303  | 0.307  | 0.779  | 0.260  | -0.626 | -2.063 | 0.081  | 238023 | HEXDC    | NM_001146073_11_+_1 |
| Fancb         | -4.811 | -0.325 | -0.073 | -0.297 | 0.934  | 0.234  | 0.408  | 0.196  | 0.516  | 1.378  | 237211 | FANCB    | NM_001146081_X_+_1  |
| Fastkd5       | 2.104  | 0.670  | 1.933  | 1.802  | 1.939  | 2.010  | 2.198  | 1.148  | 1.674  | 2.770  | 380601 | FASTKD5  | NM_001146084_2_-_1  |
| Fbxo34        | 2.739  | -2.671 | 1.660  | 1.628  | 2.313  | 2.171  | 1.875  | 0.118  | 2.360  | 2.394  | 78938  | FBXO34   | NM_001146085_14_+_1 |
| Fbxo34        | 1.453  | 3.123  | 3.756  | 3.397  | 2.881  | 2.570  | 2.969  | 3.389  | 4.144  | 3.999  | 78938  | FBXO34   | NM_001146086_14_+_1 |
| Hk1           | 3.505  | 3.666  | 3.915  | 4.077  | 4.559  | 4.555  | 4.724  | 4.810  | 5.931  | 6.003  | 15275  | HK1      | NM_001146100_10_-_1 |
| Smim19        | 5.417  | 5.716  | 4.876  | 4.759  | 4.667  | 4.656  | 4.492  | 4.411  | 3.963  | 4.113  | 102032 | SMIM19   | NM_001146117_8_-_1  |
| Fam49a        | 3.437  | 3.735  | 6.799  | 6.822  | 8.267  | 8.312  | 7.849  | 7.708  | 7.805  | 8.228  | 76820  | FAM49A   | NM_001146119_12_+_1 |
| Psap          | 10.661 | 10.955 | 11.797 | 11.742 | 8.758  | 8.285  | 10.795 | 11.184 | 12.845 | 13.114 | 19156  | PSAP     | NM_001146120_10_+_1 |
| Psap          | 3.310  | 4.227  | 4.361  | 4.144  | 1.209  | 0.181  | 3.594  | 3.047  | 3.413  | 3.728  | 19156  | PSAP     | NM_001146121_10_+_1 |
| Psap          | 7.444  | 7.967  | 8.795  | 8.834  | 5.330  | 4.884  | 7.626  | 7.953  | 8.676  | 8.929  | 19156  | PSAP     | NM_001146122_10_+_1 |
| Psap          | 0.788  | 2.051  | 2.647  | 3.655  | -0.051 | -1.579 | 1.672  | 2.487  | 3.272  | 2.989  | 19156  | PSAP     | NM_001146123_10_+_1 |
| Psap          | 8.061  | 9.038  | 10.171 | 10.193 | 6.767  | 5.541  | 8.885  | 9.709  | 10.575 | 10.815 | 19156  | PSAP     | NM_001146124_10_+_1 |
| Homer3        | 0.820  | 1.939  | -0.236 | 0.277  | 0.970  | 0.413  | 1.289  | 1.359  | 2.387  | 2.319  | 26558  | HOMER3   | NM_001146153_8_+_1  |
| Slc11a2       | -1.717 | -1.609 | 1.491  | 1.148  | 0.324  | 0.849  | 0.985  | 1.175  | 0.696  | 1.016  | 18174  | SLC11A2  | NM_001146161_15_-_1 |
| Rangap1       | 4.056  | 4.537  | 5.084  | 5.297  | 5.425  | 5.543  | 5.239  | 5.340  | 4.481  | 4.710  | 19387  | RANGAP1  | NM_001146174_15_-_1 |
| Max           | 4.528  | 4.715  | 4.866  | 4.259  | 3.893  | 3.564  | 4.213  | 4.079  | 4.358  | 4.459  | 17187  | MAX      | NM_001146176_12_-_1 |

|                |        |        |        |        |        |        |        |        |        |        |               |         |                    |
|----------------|--------|--------|--------|--------|--------|--------|--------|--------|--------|--------|---------------|---------|--------------------|
| Mtss1          | 4.267  | 4.030  | -0.590 | 1.367  | -0.930 | -0.007 | 0.458  | 1.530  | 2.611  | 1.912  | 211401        | MTSS1   | NM_001146180_15_-1 |
| Scin           | -4.981 | -1.306 | 1.364  | 1.540  | 1.980  | 0.792  | -0.489 | -2.160 | -4.981 | -4.981 | 20259         | SCIN    | NM_001146196_12_-1 |
| Record_removed | -3.099 | -3.136 | -4.149 | -4.996 | -4.120 | -4.633 | -3.955 | -4.056 | -4.981 | -4.316 | Record_remove | NA      | NM_001146198_12_-1 |
| Ptpn21         | -2.298 | -1.799 | 0.436  | 0.868  | 0.826  | -1.958 | -1.811 | -4.853 | -1.248 | -0.457 | 24000         | PTPN21  | NM_001146199_12_-1 |
| Pik3cg         | 4.334  | 4.226  | 4.861  | 4.845  | 6.170  | 5.973  | 5.724  | 5.634  | 6.564  | 7.078  | 30955         | PIK3CG  | NM_001146200_12_-1 |
| Pik3cg         | 1.672  | 1.017  | 2.247  | 1.509  | 2.728  | 1.971  | 3.289  | 2.066  | 3.006  | 1.711  | 30955         | PIK3CG  | NM_001146201_12_-1 |
| Mrps10         | 4.831  | 3.289  | 4.220  | 2.828  | 3.710  | 2.764  | 3.930  | 1.999  | 2.988  | 1.688  | 64657         | MRPS10  | NM_001146211_17_+1 |
| Mrps10         | 4.526  | 3.336  | 4.174  | 3.283  | 4.112  | 2.684  | 3.936  | 2.854  | 3.311  | 2.199  | 64657         | MRPS10  | NM_001146212_17_+1 |
| Msh5           | 3.378  | 3.594  | -2.553 | -0.957 | -0.903 | -1.935 | -2.463 | -1.526 | -1.890 | -1.927 | 17687         | MSH5    | NM_001146215_17_-1 |
| Smoc1          | -4.981 | -3.006 | -4.974 | -4.974 | -4.249 | -4.189 | -4.434 | -4.293 | -3.389 | -3.779 | 64075         | SMOC1   | NM_001146217_12_+1 |
| Dpy30          | 0.923  | 1.534  | 0.370  | 0.503  | -0.292 | 0.103  | -1.517 | -0.529 | -0.515 | -0.202 | 66310         | DPY30   | NM_001146222_17_-1 |
| Dpy30          | 6.512  | 6.587  | 5.911  | 6.151  | 5.928  | 6.173  | 6.004  | 5.828  | 4.181  | 4.378  | 66310         | DPY30   | NM_001146223_17_-1 |
| Dpy30          | -4.387 | 0.458  | 0.965  | 1.069  | 1.165  | 0.581  | 0.888  | -0.714 | -0.206 | -0.884 | 66310         | DPY30   | NM_001146224_17_-1 |
| Pdgfrb         | -4.981 | -4.981 | -4.185 | -3.490 | -3.493 | -1.950 | -0.823 | -3.086 | -0.363 | -0.488 | 18596         | PDGFRB  | NM_001146268_18_+1 |
| Iigp1          | -4.355 | -1.216 | -1.309 | -4.774 | -1.572 | -4.107 | -1.342 | -2.534 | -1.879 | -4.822 | 60440         | NA      | NM_001146275_18_+1 |
| Cables1        | 1.062  | -2.755 | -3.193 | -1.120 | -4.619 | -4.524 | -3.025 | -1.624 | 0.915  | 1.575  | 63955         | CABLES1 | NM_001146287_18_+1 |
| Celf4          | -3.795 | -3.691 | -3.371 | -4.256 | -4.401 | -4.798 | -3.675 | -1.438 | -3.914 | -4.035 | 108013        | CELFA   | NM_001146292_18_-1 |
| Celf4          | -0.920 | -3.158 | -1.741 | -2.730 | -1.150 | -3.808 | -1.721 | 0.506  | -3.451 | 0.354  | 108013        | CELFA   | NM_001146293_18_-1 |
| Celf4          | -3.563 | -3.475 | -2.744 | -3.646 | -4.198 | -4.686 | -1.135 | 0.761  | -3.733 | -3.855 | 108013        | CELFA   | NM_001146294_18_-1 |
| Adar           | 3.965  | 3.905  | 3.815  | 2.518  | 4.391  | 2.463  | 4.362  | 3.874  | 5.755  | 4.103  | 56417         | ADAR    | NM_001146296_3_+1  |
| Wac            | 2.926  | 3.056  | 1.582  | 1.567  | 2.668  | 2.218  | 2.090  | 1.622  | 2.770  | 2.703  | 225131        | WAC     | NM_001146298_18_+1 |
| Clnka          | -4.981 | -4.981 | -4.981 | -4.981 | -4.981 | -4.981 | -4.962 | -4.947 | -4.981 | -2.790 | 12733         | CLCNKB  | NM_001146307_4_-1  |
| Dbnl           | 4.776  | 4.211  | 5.207  | 4.907  | 5.190  | 4.611  | 4.708  | 3.658  | 5.052  | 3.855  | 13169         | DBNL    | NM_001146308_11_+1 |
| Dbnl           | 7.726  | 8.134  | 8.207  | 8.729  | 8.062  | 8.531  | 7.481  | 7.801  | 7.807  | 7.580  | 13169         | DBNL    | NM_001146309_11_+1 |
| Cln3           | 4.634  | 4.356  | 5.413  | 5.427  | 5.609  | 5.853  | 5.639  | 5.468  | 5.928  | 5.840  | 12752         | CLN3    | NM_001146311_7_-1  |
| Cnp            | 2.888  | 2.828  | -4.542 | -3.980 | -4.846 | -2.670 | -2.905 | -3.685 | -4.728 | -4.932 | 12799         | CNP     | NM_001146318_11_+1 |
| Hps3           | 1.439  | 3.420  | 2.284  | 1.706  | 3.202  | -0.215 | 1.746  | 2.646  | 1.203  | 0.378  | 12807         | HPS3    | NM_001146323_3_-1  |
| Hps3           | 1.944  | 1.592  | 4.116  | 3.871  | 3.636  | 3.761  | 3.415  | 3.423  | 3.683  | 3.725  | 12807         | HPS3    | NM_001146324_3_-1  |
| Tigit          | 2.050  | 1.986  | -0.896 | -1.319 | -3.120 | -3.052 | -2.577 | -1.076 | -2.878 | -4.078 | 100043314     | TIGIT   | NM_001146325_16_-1 |
| Sbk2           | -4.981 | -3.315 | -4.973 | -4.456 | -3.859 | -3.286 | -4.926 | -4.953 | -4.981 | -4.316 | 381836        | SBK2    | NM_001146329_7_-1  |
| Gpr52          | -2.573 | -1.159 | -3.270 | -3.517 | -4.638 | -4.886 | -4.472 | -4.889 | -4.394 | -4.981 | 620246        | GPR52   | NM_001146330_1_-1  |
| Rnls           | 2.153  | 1.613  | 0.307  | -0.312 | -0.345 | -0.690 | 0.639  | -0.043 | 0.824  | 0.220  | 67795         | RNLS    | NM_001146342_19_-1 |
| Emp3           | 4.955  | 4.848  | 0.362  | -0.612 | 1.996  | 1.157  | 2.095  | 2.521  | 2.727  | 3.273  | 13732         | EMP3    | NM_001146346_7_-1  |
| Eng            | -0.655 | -1.723 | -0.780 | -1.333 | -1.267 | -1.817 | -0.088 | -0.817 | -0.109 | 1.586  | 13805         | ENG     | NM_001146348_2_+1  |
| Rnf217         | -4.981 | -4.981 | 1.047  | 2.248  | -3.332 | -3.262 | -0.424 | 1.116  | 3.348  | 4.084  | 268291        | RNF217  | NM_001146349_10_-1 |
| Eng            | 1.041  | -4.178 | -2.758 | -4.697 | -3.323 | -4.004 | -2.531 | -4.871 | -4.779 | -1.277 | 13805         | ENG     | NM_001146350_2_+1  |
| Ephb6          | -0.902 | 0.913  | -0.832 | -1.130 | -4.549 | -1.917 | -3.161 | -0.217 | -1.692 | -1.955 | 13848         | EPHB6   | NM_001146351_6_+1  |
| Pip5k1c        | 6.635  | 6.475  | 6.694  | 6.636  | 6.514  | 6.386  | 6.730  | 6.383  | 7.552  | 7.159  | 18717         | PIP5K1C | NM_001146687_10_+1 |
| Ezh2           | 3.298  | 2.228  | 3.366  | 3.663  | 3.341  | 2.898  | 3.112  | 2.196  | 1.726  | 1.499  | 14056         | EZH2    | NM_001146689_6_-1  |
| Chpt1          | 3.576  | 3.116  | 2.807  | 2.906  | 1.764  | 1.440  | 2.303  | 2.147  | 3.909  | 3.685  | 212862        | CHPT1   | NM_001146690_10_-1 |
| Nap1l1         | 5.708  | 5.624  | 6.838  | 6.867  | 7.171  | 7.417  | 6.998  | 6.559  | 5.324  | 5.858  | 53605         | NAP1L1  | NM_001146707_10_+1 |
| Fas            | -1.313 | -1.277 | 1.485  | 1.116  | 0.380  | -0.523 | 0.326  | 0.331  | 1.265  | 1.522  | 14102         | FAS     | NM_001146708_19_+1 |
| Ppp1r18        | 5.369  | 5.186  | 5.602  | 5.547  | 5.972  | 5.892  | 5.606  | 5.493  | 6.217  | 6.083  | 76448         | PPP1R18 | NM_001146710_17_+1 |
| Ppp1r18        | 5.180  | 5.295  | 5.480  | 5.699  | 5.712  | 5.458  | 5.397  | 5.441  | 5.940  | 5.499  | 76448         | PPP1R18 | NM_001146711_17_+1 |
| Slc25a2        | -4.981 | -4.981 | -2.543 | -3.571 | -2.973 | -4.803 | -2.232 | -4.293 | -4.981 | -2.019 | 83885         | NA      | NM_001159275_18_-1 |
| Smtn           | -4.509 | -0.065 | -2.451 | -4.428 | -4.445 | -4.871 | -4.810 | -4.946 | -4.389 | -2.966 | 29856         | SMTN    | NM_001159284_11_-1 |
| Morc2a         | 2.106  | 2.340  | 4.507  | 4.223  | 4.101  | 3.965  | 3.818  | 3.119  | 4.170  | 3.850  | 74522         | MORC2   | NM_001159288_11_+1 |
| Bcl11a         | 4.389  | 2.843  | 2.002  | 2.111  | 1.000  | -0.582 | -0.091 | 0.206  | 1.177  | -3.502 | 14025         | BCL11A  | NM_001159289_11_+1 |
| Bcl11a         | 6.247  | 6.500  | 4.588  | 4.169  | 4.490  | 4.873  | 4.048  | 3.951  | 1.393  | 2.410  | 14025         | BCL11A  | NM_001159290_11_+1 |
| Gcsam          | -3.790 | -3.643 | 5.671  | 5.946  | -4.492 | 0.177  | -0.809 | 1.588  | -4.577 | -2.119 | 14525         | GCSAM   | NM_001159297_16_+1 |
| Lgals9         | 7.726  | 7.318  | 5.205  | 4.909  | 6.384  | 5.660  | 6.509  | 6.472  | 8.054  | 6.953  | 16859         | LGALS9B | NM_001159301_11_-1 |
| Cacnb1         | -3.062 | -1.804 | -2.101 | -0.013 | -1.337 | -2.045 | -1.451 | -1.542 | -3.284 | 0.876  | 12295         | CACNB1  | NM_001159319_11_-1 |
| Cacnb1         | -4.526 | -4.614 | -4.838 | -4.891 | -3.397 | -4.964 | -4.816 | -4.561 | -4.620 | -4.636 | 12295         | CACNB1  | NM_001159320_11_-1 |
| Gaa            | 2.116  | 2.152  | 2.531  | 1.757  | 1.169  | 1.793  | 2.394  | 3.284  | 2.917  | 2.574  | 14387         | GAA     | NM_001159324_11_+1 |
| Hgs            | 3.223  | 3.420  | 3.257  | 3.822  | 2.986  | 3.630  | 3.514  | 3.309  | 4.808  | 4.146  | 15239         | HGS     | NM_001159328_11_+1 |
| Gtpbp8         | 0.226  | 0.414  | -0.861 | -0.883 | -0.238 | -0.597 | -0.817 | -0.987 | -2.094 | -4.686 | 66067         | GTPBP8  | NM_001159329_16_-1 |
| N6amt1         | 1.865  | 2.238  | 1.977  | 0.802  | 1.276  | 1.157  | 1.053  | 1.206  | 0.809  | 0.924  | 67768         | N6AMT1  | NM_001159331_16_+1 |
| Casz1          | 0.680  | 0.142  | 0.645  | -0.660 | 0.032  | -1.074 | 0.266  | -2.014 | 0.418  | -1.705 | 69743         | CASZ1   | NM_001159344_4_+1  |
| Fytttd1        | -2.125 | -1.361 | -0.689 | -0.765 | -1.283 | -1.306 | -3.449 | -3.436 | -2.513 | -4.916 | 69823         | FYTDD1  | NM_001159349_16_+1 |
| Ube2v2         | 2.289  | 3.020  | 2.438  | 2.307  | 2.688  | 2.046  | 2.564  | 1.836  | 1.489  | 2.057  | 70620         | UBE2V2  | NM_001159351_16_-1 |
| Magi3          | 2.174  | 2.630  | 1.810  | 0.885  | 2.439  | 1.661  | 1.281  | 0.928  | 1.858  | 1.488  | 99470         | MAGI3   | NM_001159354_3_-1  |
| Dip2b          | 4.451  | 4.509  | 4.977  | 4.949  | 5.613  | 5.589  | 5.341  | 5.176  | 4.992  | 5.227  | 239667        | DIP2B   | NM_001159361_15_+1 |
| Cep97          | 1.097  | 1.373  | -0.600 | -1.590 | 0.125  | -0.087 | -0.571 | -1.024 | -4.950 | -0.904 | 74201         | CEP97   | NM_001159364_16_-1 |
| Cep97          | -4.932 | -1.584 | -2.974 | -3.594 | -2.912 | -2.413 | -4.897 | -4.465 | -3.853 | -3.378 | 74201         | CEP97   | NM_001159365_16_-1 |
| Cep97          | 1.481  | 1.288  | 0.187  | -0.147 | 0.182  | -0.288 | 0.058  | -0.371 | -1.374 | -0.736 | 74201         | CEP97   | NM_001159366_16_-1 |
| Per1           | 3.872  | 3.158  | 2.799  | 2.028  | 2.845  | 3.708  | 3.024  | 2.059  | 2.137  | 2.401  | 18626         | PER1    | NM_001159367_11_+1 |
| Polq           | -2.013 | -1.814 | -0.765 | 0.115  | 0.208  | 0.243  | -0.022 | -0.682 | -1.201 | -2.737 | 77782         | POLQ    | NM_001159369_16_+1 |
| Eif4a1         | -0.919 | -4.636 | -0.219 | -1.094 | -1.249 | -2.186 | -1.531 | -1.292 | -2.109 | -1.654 | 13681         | EIF4A1  | NM_001159375_11_-1 |
| Dusp15         | -4.981 | -4.981 | -4.981 | -4.981 | -4.125 | -4.884 | -4.228 | -4.971 | -4.981 | -4.981 | 252864        | DUSP15  | NM_001159376_2_-1  |
| Gjc1           | -3.279 | -3.544 | -4.993 | -4.609 | -3.229 | -4.909 | -4.080 | -4.954 | -4.981 | -4.981 | 14615         | GJC1    | NM_001159382_11_-1 |
| Gjc1           | -2.373 | -2.909 | -4.066 | -4.153 | -2.912 | -4.694 | -3.406 | -4.959 | -4.981 | -4.981 | 14615         | GJC1    | NM_001159383_11_-1 |
| Mlx            | 3.385  | 2.774  | 2.485  | 2.317  | 1.874  | 1.216  | 1.699  | 1.943  | 3.292  | 3.056  | 21428         | MLX     | NM_001159384_11_+1 |
| Mlx            | 5.970  | 6.235  | 5.238  | 5.451  | 5.114  | 5.279  | 5.026  | 5.356  | 5.338  | 5.352  | 21428         | MLX     | NM_001159385_11_+1 |
| Tnfai1         | 2.371  | 3.524  | 4.066  | 4.402  | 4.072  | 3.666  | 4.179  | 4.084  | 3.883  | 3.817  | 21927         | TNFAIP1 | NM_001159392_11_-1 |

|          |        |        |        |        |        |        |        |        |        |        |        |                 |                     |
|----------|--------|--------|--------|--------|--------|--------|--------|--------|--------|--------|--------|-----------------|---------------------|
| Irf1     | -1.398 | -1.278 | -0.351 | -0.853 | -1.443 | -2.427 | -1.106 | -1.892 | -1.704 | -2.097 | 16362  | IRF1            | NM_001159393_11_+_1 |
| Nfkbiz   | 7.171  | 6.643  | 5.628  | 5.684  | 6.712  | 7.294  | 7.418  | 7.398  | 7.213  | 7.723  | 80859  | NFKBIZ          | NM_001159394_16_-_1 |
| Nfkbiz   | 4.181  | 4.575  | 2.511  | 2.873  | 4.813  | 4.507  | 4.739  | 3.998  | 1.916  | 2.723  | 80859  | NFKBIZ          | NM_001159395_16_-_1 |
| Irf1     | 3.053  | 2.776  | 3.459  | 3.431  | 2.488  | 2.642  | 2.269  | 1.536  | 2.935  | 3.529  | 16362  | IRF1            | NM_001159396_11_+_1 |
| Upp1     | -4.719 | -4.981 | -1.302 | -2.198 | -3.784 | -0.611 | -4.365 | -3.199 | -1.616 | -1.121 | 22271  | UPP1            | NM_001159401_11_+_1 |
| Upp1     | -0.218 | -4.981 | 0.286  | 0.897  | -1.824 | 0.852  | -1.814 | -0.223 | -0.662 | -0.106 | 22271  | UPP1            | NM_001159402_11_+_1 |
| Llg1     | 2.703  | 2.324  | 3.043  | 3.300  | 3.900  | 3.007  | 3.215  | 3.737  | 4.802  | 4.414  | 16897  | LLGL1           | NM_001159404_11_+_1 |
| Llg1     | 1.258  | 1.888  | 0.770  | 2.322  | 0.442  | 2.039  | 0.791  | 0.800  | 2.929  | 3.578  | 16897  | LLGL1           | NM_001159405_11_+_1 |
| B3gnt5   | -4.329 | -4.111 | 0.756  | 1.752  | -2.331 | -1.246 | 0.557  | 1.224  | -4.479 | 0.424  | 108105 | B3GNT5          | NM_001159407_16_+_1 |
| B3gnt5   | -3.460 | -0.471 | 1.612  | 2.799  | -0.854 | 0.191  | -0.830 | 2.426  | -0.585 | -0.749 | 108105 | B3GNT5          | NM_001159408_16_+_1 |
| Guk1     | 5.881  | 5.738  | 5.415  | 5.442  | 4.835  | 5.209  | 5.107  | 5.136  | 4.277  | 4.160  | 14923  | GUK1            | NM_001159410_11_-_1 |
| Irf9     | 3.476  | 3.178  | 3.472  | 3.866  | 3.161  | 2.887  | 3.528  | 3.445  | 3.884  | 3.907  | 16391  | IRF9            | NM_001159417_14_+_1 |
| Irf9     | 6.367  | 6.444  | 6.572  | 6.114  | 6.416  | 5.544  | 6.386  | 6.110  | 6.659  | 6.414  | 16391  | IRF9            | NM_001159418_14_+_1 |
| Sidt1    | -1.977 | -4.981 | -1.251 | -3.047 | -4.252 | -2.420 | -3.519 | -2.783 | -4.462 | -4.572 | 320007 | SIDT1           | NM_001159419_16_-_1 |
| Ccdc58   | 0.045  | -0.471 | -1.066 | -3.230 | -0.188 | -1.136 | -2.205 | -1.831 | -1.617 | -1.542 | 381045 | CCDC58          | NM_001159421_16_+_1 |
| Ccdc58   | 3.318  | 2.837  | 2.814  | 2.875  | 2.223  | 2.430  | 2.886  | 2.477  | 1.458  | 0.939  | 381045 | CCDC58          | NM_001159422_16_+_1 |
| Il12a    | -4.256 | -4.009 | -4.863 | -4.558 | -4.721 | -4.830 | -4.863 | -4.954 | -4.109 | -4.452 | 16159  | IL12A           | NM_001159424_3_+_1  |
| Rab34    | -1.179 | -0.208 | 0.377  | 0.708  | -1.741 | -1.691 | -2.043 | -1.373 | -1.812 | -1.969 | 19376  | RAB34           | NM_001159482_11_+_1 |
| Rpl19    | 3.878  | 3.813  | 2.592  | 3.261  | 2.923  | 2.619  | 4.069  | 3.050  | 1.981  | 2.277  | 19921  | RPL19           | NM_001159483_11_+_1 |
| Mcf2l    | -4.296 | -3.254 | -4.169 | -3.320 | -4.956 | -4.794 | -3.436 | -2.914 | 2.730  | 2.962  | 17207  | MCF2L           | NM_001159485_8_+_1  |
| Mcf2l    | -2.473 | -1.520 | -3.739 | -2.812 | -4.930 | -3.733 | -2.440 | -2.445 | -0.084 | -0.863 | 17207  | MCF2L           | NM_001159486_8_+_1  |
| Rbp4     | -4.981 | -4.981 | -4.981 | -4.981 | -4.981 | -4.981 | -4.981 | -4.981 | -4.981 | -4.981 | 19662  | RBP4            | NM_001159487_19_-_1 |
| Gpatch8  | 4.946  | 4.945  | 5.319  | 5.132  | 5.446  | 5.325  | 5.343  | 5.200  | 5.568  | 5.477  | 237943 | GPATCH8         | NM_001159492_11_-_1 |
| Ppm1b    | 4.044  | 4.632  | 4.695  | 4.862  | 4.960  | 5.116  | 4.660  | 4.773  | 4.383  | 4.717  | 19043  | PPM1B           | NM_001159496_17_+_1 |
| Ppm1b    | 1.071  | 0.863  | 2.146  | 2.007  | 1.571  | 1.401  | 1.664  | 1.424  | 2.873  | 1.620  | 19043  | PPM1B           | NM_001159497_17_+_1 |
| Ppm1b    | 2.163  | 1.944  | 1.537  | 1.623  | 1.574  | 1.454  | 0.643  | 0.850  | 1.046  | 0.320  | 19043  | PPM1B           | NM_001159498_17_+_1 |
| Ddx24    | 1.103  | 1.877  | 1.286  | 2.041  | 1.761  | 1.389  | 2.493  | 1.299  | 1.625  | 1.493  | 27225  | DDX24           | NM_001159502_12_-_1 |
| Tnfsfm13 | -2.061 | -4.981 | -0.114 | -0.794 | -0.999 | -2.933 | 1.613  | 1.867  | 3.630  | 3.533  | 619441 | TNFSF12-TNFSF13 | NM_001159503_11_-_1 |
| Tnfsf13  | 1.549  | -3.674 | 0.041  | -0.002 | -0.746 | -0.045 | 3.114  | 5.219  | 5.472  | 6.217  | 69583  | TNFSF13         | NM_001159505_11_-_1 |
| Grip2    | -1.158 | -0.992 | -1.171 | -0.970 | -0.712 | -1.662 | -1.604 | -2.350 | -1.601 | -1.063 | 243547 | GRIP2           | NM_001159507_6_-_1  |
| Pacsin2  | 4.417  | 4.530  | 5.960  | 5.976  | 6.523  | 5.809  | 6.403  | 6.499  | 7.700  | 7.714  | 23970  | PACSIN2         | NM_001159509_15_-_1 |
| Pacsin2  | 1.102  | 0.811  | 3.365  | 2.790  | 3.068  | 2.025  | 3.544  | 3.512  | 3.735  | 4.343  | 23970  | PACSIN2         | NM_001159510_15_-_1 |
| H2afy    | 7.187  | 6.409  | 8.515  | 8.287  | 8.340  | 7.893  | 8.291  | 8.056  | 7.931  | 7.678  | 26914  | H2AFY           | NM_001159513_13_-_1 |
| H2afy    | 6.864  | 6.455  | 5.810  | 5.597  | 5.501  | 5.552  | 5.155  | 5.218  | 4.025  | 4.806  | 26914  | H2AFY           | NM_001159514_13_-_1 |
| H2afy    | 7.648  | 7.711  | 6.766  | 6.613  | 6.271  | 6.715  | 6.238  | 6.406  | 5.448  | 5.378  | 26914  | H2AFY           | NM_001159515_13_-_1 |
| Qk       | 3.847  | 4.010  | 4.858  | 4.575  | 4.550  | 4.390  | 5.591  | 5.396  | 6.896  | 7.517  | 19317  | QKI             | NM_001159516_17_-_1 |
| Qk       | 5.999  | 6.233  | 6.017  | 6.032  | 6.303  | 6.294  | 6.346  | 6.398  | 6.936  | 7.216  | 19317  | QKI             | NM_001159517_17_-_1 |
| Igfbp7   | -4.981 | -4.981 | -4.716 | -4.967 | -4.904 | -4.943 | -4.785 | -4.900 | -4.981 | -4.946 | 29817  | IGFBP7          | NM_001159518_5_-_1  |
| Pfas     | 2.316  | 3.124  | 2.432  | 2.585  | 3.013  | 3.020  | 2.337  | 2.477  | 1.519  | 1.195  | 237823 | PFAS            | NM_001159519_11_-_1 |
| Plxnb2   | 1.614  | 2.210  | 1.369  | -0.248 | 1.828  | 2.917  | 2.399  | 2.266  | 3.684  | 3.971  | 140570 | PLXNB2          | NM_001159521_15_-_1 |
| Shd      | -4.981 | -2.705 | -4.133 | -4.669 | -4.847 | -4.852 | -4.749 | -4.927 | -4.512 | -4.001 | 20420  | SHD             | NM_001159523_17_+_1 |
| Pex19    | -3.962 | -2.381 | -4.421 | -4.571 | -4.780 | -4.937 | -4.025 | -4.824 | -4.469 | -4.640 | 19298  | PEX19           | NM_001159525_1_+_1  |
| Wdr35    | 0.870  | 1.737  | -0.634 | -1.404 | -1.573 | 0.229  | -0.702 | -1.635 | -0.889 | 0.772  | 74682  | WDR35           | NM_001159527_12_+_1 |
| Cox7a2l  | -0.386 | 1.600  | 0.735  | -0.109 | -0.898 | -1.185 | -0.531 | -4.672 | -0.020 | 0.390  | 20463  | COX7A2L         | NM_001159529_17_-_1 |
| Cacna1c  | -4.981 | -4.981 | -4.980 | -4.980 | -4.306 | -4.741 | -4.980 | -4.979 | -4.981 | -4.981 | 12288  | CACNA1C         | NM_001159533_6_-_1  |
| Cacna1c  | -4.981 | -4.981 | -4.980 | -4.980 | -4.306 | -4.741 | -4.980 | -4.979 | -4.981 | -4.981 | 12288  | CACNA1C         | NM_001159534_6_-_1  |
| Cacna1c  | -4.981 | -4.981 | -4.979 | -4.979 | -4.311 | -4.738 | -4.980 | -4.979 | -4.981 | -4.981 | 12288  | CACNA1C         | NM_001159535_6_-_1  |
| Adcy3    | 0.028  | -0.392 | -3.262 | -2.663 | -2.515 | -4.577 | -4.414 | -4.905 | -4.625 | -3.947 | 104111 | ADCY3           | NM_001159536_12_+_1 |
| Adcy3    | 0.913  | -2.872 | -3.655 | -4.742 | -2.949 | -2.583 | -3.411 | -0.690 | -4.696 | -2.786 | 104111 | ADCY3           | NM_001159537_12_+_1 |
| Fgd2     | 4.553  | 4.131  | 7.024  | 6.907  | 5.205  | 5.373  | 5.664  | 5.485  | 4.471  | 3.994  | 26382  | FGD2            | NM_001159538_17_+_1 |
| Dpp4     | 1.870  | 3.075  | 5.274  | 4.866  | 4.822  | 4.510  | 4.152  | 3.777  | 2.481  | 2.108  | 13482  | DPP4            | NM_001159543_2_-_1  |
| Nr6a1    | -3.074 | -1.826 | -0.439 | -0.624 | -3.637 | -3.789 | -2.298 | -3.226 | -1.342 | 0.041  | 14536  | NR6A1           | NM_001159548_2_-_1  |
| Nr6a1    | -3.043 | -1.635 | -0.983 | -0.866 | -3.544 | -2.631 | -2.026 | -1.297 | -1.212 | -3.081 | 14536  | NR6A1           | NM_001159549_2_-_1  |
| H13      | 5.482  | 5.133  | 4.603  | 4.643  | 4.573  | 4.697  | 4.391  | 4.536  | 4.202  | 4.168  | 14950  | HM13            | NM_001159551_2_+_1  |
| H13      | 1.987  | 2.258  | 1.899  | 1.895  | 1.830  | 1.325  | 1.163  | 1.434  | 2.105  | 2.272  | 14950  | HM13            | NM_001159552_2_+_1  |
| H13      | 3.481  | 3.268  | 3.393  | 2.874  | 2.726  | 2.930  | 2.730  | 2.515  | 2.559  | 2.693  | 14950  | HM13            | NM_001159553_2_+_1  |
| Cd36     | 1.459  | 2.760  | 1.925  | 0.221  | -4.526 | -0.688 | 3.114  | 1.706  | 3.234  | -1.963 | 12491  | CD36            | NM_001159555_5_-_1  |
| Cd36     | 1.704  | 1.927  | 8.109  | 8.728  | -1.556 | 2.031  | 3.558  | 4.704  | 2.394  | 2.853  | 12491  | CD36            | NM_001159556_5_-_1  |
| Cd36     | 1.665  | 1.103  | 6.188  | 6.637  | -2.164 | 0.470  | 1.002  | 3.349  | 0.898  | 0.347  | 12491  | CD36            | NM_001159557_5_-_1  |
| Cd36     | -3.610 | -2.904 | 2.622  | 3.713  | -4.550 | -3.391 | -1.458 | 1.386  | -0.598 | -0.368 | 12491  | CD36            | NM_001159558_5_-_1  |
| Xrcc6bp1 | 3.406  | 4.202  | 2.911  | 3.933  | 2.140  | 3.483  | 2.457  | 3.559  | 2.071  | 3.122  | 68876  | ATP23           | NM_001159559_10_-_1 |
| P2rx6    | -3.797 | -4.981 | -4.975 | -4.017 | -4.980 | -4.842 | -4.960 | -4.408 | -3.302 | -4.981 | 18440  | P2RX6           | NM_001159561_16_+_1 |
| Il1rn    | -4.981 | -4.981 | -1.161 | -2.497 | 1.767  | 0.465  | 4.258  | 4.296  | 2.838  | 3.620  | 16181  | IL1RN           | NM_001159562_2_+_1  |
| Orc3     | 4.289  | 4.364  | 4.410  | 4.661  | 4.601  | 4.435  | 4.355  | 4.015  | 3.936  | 4.701  | 50793  | ORC3            | NM_001159563_4_-_1  |
| Dctn3    | 1.701  | 0.747  | 0.218  | 0.362  | 0.343  | 0.248  | 0.141  | -0.512 | 0.712  | 0.482  | 53598  | DCTN3           | NM_001159565_4_-_1  |
| Ephb4    | -4.981 | -4.981 | -4.797 | -4.663 | -4.853 | -4.689 | -4.973 | -4.060 | -4.981 | -4.981 | 13846  | EPHB4           | NM_001159571_5_+_1  |
| Vsir     | 4.634  | 4.310  | 4.907  | 5.101  | 4.726  | 4.928  | 5.366  | 5.846  | 7.143  | 7.238  | 74048  | C10orf54        | NM_001159572_10_+_1 |
| Fip1l1   | 4.063  | 4.518  | 4.073  | 4.150  | 4.589  | 4.556  | 4.281  | 4.049  | 4.215  | 3.944  | 66899  | NA              | NM_001159573_5_+_1  |
| Fip1l1   | 2.585  | 1.777  | 2.347  | 0.743  | 1.737  | 1.421  | 1.839  | 1.915  | 0.550  | 0.802  | 66899  | NA              | NM_001159574_5_+_1  |
| Lnx1     | -4.717 | -2.281 | -4.799 | -4.948 | -4.741 | -3.451 | -4.906 | -4.964 | -4.725 | -4.916 | 16924  | LNK1            | NM_001159577_5_-_1  |
| Lnx1     | -4.981 | -4.981 | -4.799 | -4.981 | -4.972 | -4.980 | -4.980 | -4.980 | -4.981 | -4.960 | 16924  | LNK1            | NM_001159578_5_-_1  |
| Lnx1     | -3.507 | -3.280 | -3.477 | -4.371 | -4.076 | -4.673 | -3.879 | -4.586 | -3.209 | -3.555 | 16924  | LNK1            | NM_001159579_5_-_1  |
| Lnx1     | -1.998 | -2.482 | -0.966 | -2.495 | -1.378 | -2.505 | -1.214 | -2.465 | -0.465 | -0.387 | 16924  | LNK1            | NM_001159580_5_-_1  |
| Mutyh    | -0.470 | 0.953  | -1.886 | -3.281 | -0.363 | -1.694 | -1.438 | -1.174 | -1.163 | -4.719 | 70603  | MUTYH           | NM_001159581_4_+_1  |

|          |        |        |        |        |        |        |        |        |        |        |        |               |                    |
|----------|--------|--------|--------|--------|--------|--------|--------|--------|--------|--------|--------|---------------|--------------------|
| Fam219a  | 1.717  | 1.533  | 1.057  | 0.686  | 0.663  | -0.113 | 0.305  | -0.049 | 1.215  | 0.912  | 71901  | FAM219A       | NM_001159583_4_-1  |
| Sirt1    | 0.525  | 0.645  | 0.429  | 1.020  | 0.732  | 0.916  | 0.991  | 0.657  | 1.650  | 1.812  | 93759  | SIRT1         | NM_001159589_10_-1 |
| Csnk1g2  | 5.546  | 5.401  | 5.261  | 5.205  | 5.255  | 5.201  | 5.206  | 5.212  | 5.698  | 5.376  | 103236 | CSNK1G2       | NM_001159591_10_+1 |
| Slc20a1  | -3.368 | -2.079 | -0.505 | -0.309 | 0.055  | -1.094 | -0.957 | -0.545 | 0.626  | 0.424  | 20515  | SLC20A1       | NM_001159593_2_+1  |
| Ints8    | 3.881  | 3.565  | 3.778  | 3.558  | 3.557  | 3.296  | 3.552  | 3.485  | 2.998  | 3.702  | 72656  | INTS8         | NM_001159595_4_-1  |
| Axin1    | 4.789  | 4.708  | 5.127  | 4.925  | 5.658  | 5.337  | 5.238  | 5.116  | 6.113  | 5.639  | 12005  | AXIN1         | NM_001159598_17_+1 |
| Nol9     | 3.155  | 3.237  | 4.203  | 4.158  | 3.886  | 3.712  | 3.058  | 4.032  | 4.385  | 4.324  | 74035  | NOL9          | NM_001159599_4_+1  |
| Tmem8c   | -1.378 | -1.627 | -4.981 | -4.981 | -4.981 | -4.981 | -4.981 | -4.981 | -4.981 | -4.981 | 66139  | TMEM8C        | NM_001159602_2_-1  |
| Pum1     | 0.425  | 3.391  | 4.310  | 3.164  | 3.899  | 3.744  | 3.370  | 3.038  | 4.569  | 5.087  | 80912  | PUM1          | NM_001159603_4_+1  |
| Pum1     | 3.202  | 2.795  | 3.220  | 3.741  | 2.752  | 3.487  | 3.440  | 2.597  | 3.332  | 2.818  | 80912  | PUM1          | NM_001159604_4_+1  |
| Pum1     | -3.309 | 1.079  | 1.126  | 0.602  | 1.612  | 0.034  | 0.444  | 1.630  | 2.380  | 2.366  | 80912  | PUM1          | NM_001159605_4_+1  |
| Pum1     | 3.345  | 2.945  | 2.501  | 2.111  | 1.365  | 2.085  | 2.495  | 1.065  | 0.920  | 0.432  | 80912  | PUM1          | NM_001159606_4_+1  |
| Lrrc57   | -0.668 | -0.736 | -4.063 | -2.687 | -1.926 | -2.439 | -3.756 | -2.073 | -4.238 | -1.018 | 66606  | LRRC57        | NM_001159609_2_-1  |
| Lrrc57   | 2.719  | 0.803  | 2.154  | 1.644  | 1.567  | 0.816  | 1.640  | 1.013  | 1.093  | 1.671  | 66606  | LRRC57        | NM_001159610_2_-1  |
| Lrrc57   | 2.515  | 0.734  | 2.304  | 2.133  | 2.468  | 0.829  | 0.733  | 2.490  | 2.843  | 2.964  | 66606  | LRRC57        | NM_001159612_2_-1  |
| Pigp     | 6.425  | 6.125  | 4.781  | 4.430  | 4.303  | 4.329  | 4.645  | 4.059  | 2.086  | 2.273  | 56176  | PIGP          | NM_001159616_16_-1 |
| Pigp     | 1.564  | 1.636  | 0.952  | -0.192 | -0.040 | -0.339 | 0.760  | -0.866 | -3.245 | -2.482 | 56176  | PIGP          | NM_001159617_16_-1 |
| Pigp     | 5.425  | 5.544  | 2.986  | 2.945  | 3.326  | 3.908  | 2.671  | 2.658  | -0.123 | -0.001 | 56176  | PIGP          | NM_001159618_16_-1 |
| Pigp     | 2.620  | 3.567  | 1.403  | 2.297  | 1.708  | 2.195  | 1.084  | 1.469  | 0.204  | 0.629  | 56176  | PIGP          | NM_001159619_16_-1 |
| Pigp     | -2.001 | -2.076 | -4.942 | -3.249 | -4.268 | -3.433 | -3.756 | -3.476 | -4.981 | -4.981 | 56176  | PIGP          | NM_001159620_16_-1 |
| Rnpep    | 1.554  | -1.317 | 3.509  | 3.539  | 2.958  | 2.347  | 3.614  | 3.541  | 4.801  | 5.129  | 215615 | RNPEP         | NM_001159624_1_-1  |
| Hagh     | 2.860  | 1.148  | 0.884  | 1.116  | 1.370  | 1.191  | -1.273 | -0.622 | 0.936  | 1.280  | 14651  | HAGH          | NM_001159626_17_+1 |
| Scmh1    | -4.840 | -4.981 | -1.382 | -1.607 | -0.604 | -2.448 | -0.315 | -2.654 | -0.117 | -0.299 | 29871  | SCMH1         | NM_001159630_4_+1  |
| Nek6     | 4.974  | 4.533  | 3.757  | 3.960  | -0.066 | -0.513 | -0.950 | 1.992  | -0.629 | -1.613 | 59126  | NEK6          | NM_001159631_2_+1  |
| Slc44a1  | 3.409  | 3.239  | 3.069  | 3.444  | 3.636  | 3.738  | 2.780  | 2.121  | 1.952  | 2.183  | 100434 | SLC44A1       | NM_001159633_4_+1  |
| Prrc2b   | 1.573  | 2.156  | 3.263  | 2.890  | 3.573  | 2.921  | 2.691  | 2.901  | 3.949  | 4.261  | 227723 | PRRC2B        | NM_001159634_2_+1  |
| Rbm18    | 2.946  | 1.600  | 2.113  | -1.150 | 1.696  | 0.430  | 1.393  | 0.044  | 1.226  | 2.015  | 67889  | RBM18         | NM_001159635_2_-1  |
| Wdsub1   | -4.550 | -4.314 | -4.886 | -4.955 | -4.952 | -4.977 | -3.287 | -4.944 | -4.788 | -4.934 | 72137  | WDSUB1        | NM_001159636_2_-1  |
| Nadk     | 5.570  | 5.772  | 6.857  | 7.261  | 5.493  | 5.447  | 4.803  | 6.336  | 5.667  | 6.417  | 192185 | NADK          | NM_001159637_4_+1  |
| Them7    | -3.244 | -1.961 | -2.706 | -2.116 | -4.967 | -4.397 | -3.402 | -4.592 | -4.981 | -4.981 | 74088  | NA            | NM_001159638_2_+1  |
| Tasp1    | 2.641  | 1.796  | 0.586  | 0.601  | 1.152  | 1.213  | 0.152  | 1.143  | 0.000  | 0.545  | 75812  | TASP1         | NM_001159640_2_-1  |
| Tasp1    | 1.065  | -0.056 | -1.117 | -2.932 | -1.940 | -1.328 | -1.810 | -3.679 | -4.313 | -3.960 | 75812  | TASP1         | NM_001159641_2_-1  |
| Araf     | 5.509  | 5.811  | 5.034  | 5.106  | 5.147  | 5.403  | 4.816  | 4.794  | 4.255  | 4.403  | 11836  | ARAF          | NM_001159645_X_+1  |
| Dut      | 4.791  | 4.059  | 5.280  | 4.562  | 5.082  | 4.214  | 4.817  | 3.933  | 2.630  | 1.991  | 110074 | DUT           | NM_001159646_2_+1  |
| Cntn1    | -4.250 | -4.981 | -4.793 | -4.643 | -4.824 | -4.862 | -4.966 | -4.774 | -4.981 | -4.981 | 12805  | CNTN1         | NM_001159647_15_+1 |
| Cntn1    | -2.062 | -4.981 | -3.942 | -0.992 | -2.786 | -0.185 | -4.938 | -1.616 | -4.981 | -4.981 | 12805  | CNTN1         | NM_001159648_15_+1 |
| Lax1     | 1.714  | 1.335  | -3.464 | 1.205  | -1.050 | 1.947  | 1.903  | 4.530  | -2.153 | -0.471 | 240754 | LAX1          | NM_001159649_1_-1  |
| Crybb3   | -4.981 | -4.981 | -4.697 | -4.304 | -4.112 | -4.218 | -4.968 | -4.800 | -4.981 | -4.981 | 12962  | CRYBB3        | NM_001159650_5_-1  |
| Gpr62    | -0.200 | 1.393  | -4.981 | -4.981 | -4.985 | -4.555 | -4.959 | -3.167 | -4.394 | -4.981 | 436090 | GPR62         | NM_001159652_9_-1  |
| Proser2  | -1.718 | -4.393 | -0.126 | 1.811  | -4.692 | -4.886 | -4.206 | -4.783 | -4.781 | -3.380 | 227545 | PROSER2       | NM_001159657_2_-1  |
| Aqp12    | -4.083 | -4.981 | -4.046 | -4.258 | -3.220 | -4.551 | -2.773 | -4.123 | -2.238 | -3.822 | 208760 | AQP12A AQP12B | NM_001159658_1_+1  |
| Ppp1r16b | 2.703  | 3.041  | 2.673  | 2.486  | 3.030  | 3.140  | 1.465  | 2.805  | -0.963 | -1.143 | 228852 | PPP1R16B      | NM_001159662_2_+1  |
| Efl1     | 2.487  | 2.330  | 2.496  | 2.963  | 3.129  | 1.972  | 2.444  | 2.055  | 2.869  | 2.790  | 101592 | EFL1          | NM_001159672_7_+1  |
| Zfp217   | 1.995  | 2.728  | 3.579  | 3.038  | 2.798  | 3.314  | 3.632  | 2.975  | 3.314  | 3.166  | 228913 | ZNF217        | NM_001159683_2_-1  |
| Efcc1    | -2.784 | -2.895 | 2.227  | 2.121  | -3.751 | -2.687 | -3.740 | -4.001 | -3.823 | -4.981 | 58229  | EFCC1         | NM_001159697_6_+1  |
| Ly96     | -3.336 | -4.981 | -1.818 | -1.549 | -2.283 | -2.553 | -3.930 | -1.520 | -0.185 | -2.423 | 17087  | LY96          | NM_001159711_1_+1  |
| Prpf31   | -0.278 | -0.791 | -0.627 | 0.232  | -0.678 | -1.365 | -1.499 | -1.225 | -0.075 | -2.238 | 68988  | PRPF31        | NM_001159714_7_+1  |
| Sept2    | 3.118  | 3.368  | 3.605  | 3.850  | 3.043  | 2.595  | 2.976  | 2.614  | 3.219  | 3.430  | 18000  | SEPT2         | NM_001159717_1_+1  |
| Sept2    | 5.472  | 4.890  | 4.949  | 4.574  | 3.984  | 3.440  | 5.058  | 4.062  | 4.017  | 4.110  | 18000  | SEPT2         | NM_001159718_1_+1  |
| Sept2    | 0.818  | -0.418 | 1.775  | -0.040 | 0.066  | 0.602  | 1.040  | 0.458  | 1.213  | 2.090  | 18000  | SEPT2         | NM_001159719_1_+1  |
| Nectin2  | 0.868  | -4.981 | -0.765 | 0.053  | -0.001 | -2.643 | 0.732  | -0.403 | 0.876  | -0.509 | 19294  | NECTIN2       | NM_001159724_7_-1  |
| Rab17    | -3.668 | -2.681 | -4.956 | -4.956 | -3.465 | -2.501 | -4.969 | -4.516 | -4.981 | -3.498 | 19329  | RAB17         | NM_001159725_1_-1  |
| Rab23    | -0.680 | -2.297 | -0.056 | -1.751 | -2.978 | -2.514 | -2.135 | -1.194 | -4.624 | 0.069  | 19335  | RAB23         | NM_001159729_1_+1  |
| St8sia4  | 8.094  | 8.277  | 5.776  | 5.747  | 5.583  | 5.513  | 4.787  | 4.965  | 3.946  | 3.086  | 20452  | ST8SIA4       | NM_001159745_1_-1  |
| Serpinb8 | -2.114 | -4.981 | 0.381  | 0.684  | -3.919 | -4.857 | -1.950 | -0.163 | 1.201  | 1.683  | 20725  | SERPINB8      | NM_001159748_1_+1  |
| Tcea1    | 4.325  | 4.683  | 4.223  | 4.650  | 4.268  | 4.133  | 4.650  | 4.315  | 4.151  | 3.777  | 21399  | TCEA1         | NM_001159750_1_+1  |
| Tcea1    | -0.651 | -1.065 | 0.006  | -1.140 | -0.493 | -2.559 | -1.183 | -0.412 | -0.624 | 0.330  | 21399  | TCEA1         | NM_001159751_1_+1  |
| Ikbkb    | 5.863  | 5.653  | 6.541  | 6.589  | 6.885  | 6.796  | 7.245  | 7.278  | 8.639  | 8.595  | 16150  | IKKBK         | NM_001159774_8_-1  |
| Kctd18   | 3.823  | 3.793  | 2.904  | 2.883  | 3.134  | 3.052  | 2.986  | 2.612  | 3.509  | 3.386  | 51960  | KCTD18        | NM_001159864_1_-1  |
| Kctd18   | -0.002 | 0.907  | -0.009 | -2.849 | -1.225 | 0.386  | 1.141  | -0.861 | -1.738 | -1.413 | 51960  | KCTD18        | NM_001159865_1_-1  |
| Uchl5    | 5.618  | 5.487  | 4.995  | 5.041  | 4.896  | 4.709  | 4.969  | 4.575  | 3.554  | 3.921  | 56207  | UCHL5         | NM_001159866_1_+1  |
| Dnajb2   | 1.419  | 1.731  | 1.067  | 0.892  | 0.908  | 0.799  | -1.119 | 0.462  | 0.537  | 0.668  | 56812  | DNAJB2        | NM_001159883_1_+1  |
| Dnajb2   | 0.754  | 0.449  | -3.076 | -3.249 | -0.964 | -4.029 | -3.506 | -1.503 | -4.712 | -4.981 | 56812  | DNAJB2        | NM_001159884_1_+1  |
| Dnajb2   | 1.875  | 2.811  | 1.580  | 1.648  | 1.299  | 2.503  | 1.621  | 1.372  | 0.227  | 0.204  | 56812  | DNAJB2        | NM_001159885_1_+1  |
| Ociad1   | 1.962  | 1.796  | 1.520  | 0.648  | 0.967  | 0.098  | 1.235  | 0.516  | 1.029  | 0.450  | 68095  | OCIAD1        | NM_001159887_5_+1  |
| Ociad1   | 1.204  | 1.533  | 0.361  | 0.327  | 0.305  | 0.005  | 0.958  | -1.208 | 0.675  | 0.287  | 68095  | OCIAD1        | NM_001159888_5_+1  |
| Ociad1   | 1.709  | 1.896  | 2.280  | 1.896  | 2.208  | 1.630  | 1.953  | 1.145  | 1.998  | 2.346  | 68095  | OCIAD1        | NM_001159889_5_+1  |
| Hopx     | 2.821  | -2.349 | 1.622  | -1.628 | 0.108  | -0.417 | 3.191  | 3.390  | 7.824  | 6.802  | 74318  | HOPX          | NM_001159900_5_-1  |
| Hopx     | -1.364 | -4.981 | -3.196 | -3.580 | -3.730 | -4.356 | -1.305 | -0.344 | 4.334  | 3.753  | 74318  | HOPX          | NM_001159901_5_-1  |
| Klrb1a   | -1.742 | -4.981 | -2.684 | -4.689 | -4.085 | -4.786 | -2.069 | -4.977 | -2.315 | -4.981 | 17057  | KLRB1         | NM_001159902_6_-1  |
| Klrb1c   | -0.663 | -4.981 | -1.468 | -4.777 | -3.165 | -4.148 | 0.549  | -2.709 | -1.399 | -4.981 | 17059  | KLRB1         | NM_001159904_6_-1  |
| Zfand2b  | 5.097  | 4.833  | 4.350  | 4.308  | 4.189  | 3.999  | 4.567  | 4.808  | 5.111  | 5.038  | 68818  | ZFAND2B       | NM_001159905_1_+1  |
| Zfand2b  | 3.617  | 4.373  | 2.689  | 3.213  | 2.703  | 2.791  | 2.565  | 3.189  | 3.643  | 4.116  | 68818  | ZFAND2B       | NM_001159906_1_+1  |
| Tarbp1   | 0.917  | 0.853  | -0.219 | -0.304 | -0.299 | 0.101  | 0.153  | 0.540  | 1.369  | 1.473  | 212728 | TARBP1        | NM_001159907_8_-1  |

|               |        |        |        |        |        |        |        |        |        |        |        |           |                     |
|---------------|--------|--------|--------|--------|--------|--------|--------|--------|--------|--------|--------|-----------|---------------------|
| Zfand2a       | 2.074  | 2.417  | 2.765  | 3.164  | 2.822  | 2.866  | 2.956  | 2.213  | 3.312  | 3.106  | 100494 | ZFAND2A   | NM_001159908_5_-_1  |
| Ccdc85c       | -4.981 | -4.981 | -3.398 | -4.061 | -2.457 | -4.309 | -3.672 | -4.722 | -3.750 | -4.981 | 668158 | CCDC85C   | NM_001159910_12_-_1 |
| Cenpl         | 2.339  | 3.508  | 3.247  | 2.935  | 3.495  | 3.344  | 3.572  | 3.245  | 2.739  | 2.575  | 70454  | CENPL     | NM_001159930_1_+_1  |
| Kctd10        | 4.362  | 3.947  | 4.347  | 3.945  | 2.486  | 2.818  | 3.224  | 3.122  | 5.489  | 5.248  | 330171 | KCTD10    | NM_001159941_5_-_1  |
| Plekhp1       | -4.981 | -4.072 | -1.505 | -0.251 | 0.353  | 0.700  | 0.356  | 1.163  | 5.149  | 5.067  | 213783 | PLEKHP1   | NM_001159942_10_+_1 |
| Als2          | 0.575  | -1.789 | 1.833  | 1.602  | 0.253  | 0.546  | -2.276 | 0.514  | 1.062  | -3.994 | 74018  | ALS2      | NM_001159948_1_-_1  |
| Pde1c         | -4.031 | -4.140 | -4.786 | -4.972 | -4.864 | -4.981 | -4.727 | -4.958 | -4.981 | -4.981 | 18575  | PDE1C     | NM_001159952_6_-_1  |
| Pde1c         | -0.137 | 0.428  | -2.694 | -4.345 | -3.403 | -4.444 | -3.131 | -4.810 | -3.109 | -4.981 | 18575  | PDE1C     | NM_001159953_6_-_1  |
| Pde1c         | -3.824 | -0.263 | -4.933 | -4.978 | -4.981 | -4.981 | -4.827 | -4.966 | -4.981 | -4.981 | 18575  | PDE1C     | NM_001159955_6_-_1  |
| Pde1c         | -0.470 | -4.679 | -4.855 | -4.969 | -4.980 | -4.959 | -3.366 | -4.893 | -4.981 | -4.981 | 18575  | PDE1C     | NM_001159956_6_-_1  |
| Pde1c         | -0.639 | 0.811  | -2.264 | -4.973 | -2.914 | -4.702 | -3.286 | -4.771 | -4.981 | -4.981 | 18575  | PDE1C     | NM_001159957_6_-_1  |
| Pde1c         | -3.690 | -3.940 | -4.747 | -4.973 | -4.863 | -4.665 | -4.676 | -4.954 | -4.981 | -4.981 | 18575  | PDE1C     | NM_001159960_6_-_1  |
| Fbxl5         | 5.703  | 6.022  | 6.195  | 5.894  | 5.516  | 5.600  | 5.633  | 5.832  | 6.622  | 7.046  | 242960 | FBXL5     | NM_001159963_5_-_1  |
| Eps15         | 0.767  | 1.304  | -3.516 | -2.160 | -4.323 | -3.797 | 0.648  | -2.472 | -1.134 | -0.608 | 13858  | EPS15     | NM_001159964_4_+_1  |
| Ralgs2        | 2.457  | 2.433  | 0.119  | 1.921  | 0.034  | 0.712  | -0.259 | 2.940  | 0.272  | -1.440 | 78255  | RALGPS2   | NM_001159965_1_-_1  |
| Ralgs2        | -2.871 | -3.302 | -2.400 | -2.816 | -2.005 | -0.935 | -2.745 | -3.514 | -3.000 | -0.324 | 78255  | RALGPS2   | NM_001159966_1_-_1  |
| Ralgs2        | 5.245  | 4.455  | 2.362  | 3.487  | 1.593  | 3.402  | 2.650  | 4.820  | 3.079  | 1.561  | 78255  | RALGPS2   | NM_001159967_1_-_1  |
| Ralgs2        | 0.593  | -2.103 | -3.772 | -4.022 | -2.720 | -3.156 | -4.057 | -1.336 | -4.645 | -4.912 | 78255  | RALGPS2   | NM_001159968_1_-_1  |
| Sec16b        | -4.981 | -0.922 | -4.146 | -3.679 | -2.694 | -3.595 | -2.013 | -0.804 | -0.044 | 2.200  | 89867  | SEC16B    | NM_001159986_1_+_1  |
| Gnb1          | 6.184  | 6.913  | 6.331  | 7.031  | 6.244  | 6.729  | 6.194  | 6.810  | 6.110  | 6.945  | 14688  | GNB1      | NM_001160016_4_+_1  |
| Gnb1          | 6.442  | 6.671  | 7.192  | 7.863  | 6.651  | 7.233  | 6.753  | 7.479  | 6.461  | 7.644  | 14688  | GNB1      | NM_001160017_4_+_1  |
| Tor1aip1      | 6.478  | 6.304  | 6.802  | 6.510  | 6.661  | 6.488  | 6.794  | 6.592  | 7.321  | 6.841  | 208263 | TOR1AIP1  | NM_001160018_1_-_1  |
| Tor1aip1      | 4.480  | 3.772  | 3.754  | 3.449  | 3.107  | 1.683  | 2.288  | 2.170  | 3.008  | 2.858  | 208263 | TOR1AIP1  | NM_001160019_1_-_1  |
| Ndufs1        | 1.804  | 3.119  | 2.587  | 2.588  | 1.978  | 2.011  | 1.132  | 2.714  | 1.849  | 3.087  | 227197 | NDUFS1    | NM_001160038_1_-_1  |
| Ndufs1        | 3.842  | 3.694  | 3.803  | 3.562  | 3.151  | 3.433  | 2.407  | 3.773  | 3.722  | 3.641  | 227197 | NDUFS1    | NM_001160039_1_-_1  |
| Ndufs1        | 2.943  | 3.690  | 3.728  | 3.414  | 2.911  | 3.585  | 3.726  | 3.794  | 3.828  | 4.253  | 227197 | NDUFS1    | NM_001160040_1_-_1  |
| Exo5          | 1.546  | 1.665  | 0.897  | 1.310  | 0.701  | 0.806  | 0.579  | 1.475  | 0.934  | 1.350  | 73172  | EXO5      | NM_001160043_4_-_1  |
| Cldn10        | -4.954 | -4.981 | -4.974 | -4.974 | -4.981 | -4.981 | -4.981 | -4.981 | -4.981 | -4.981 | 58187  | CLDN10    | NM_001160096_14_+_1 |
| Cldn10        | -3.090 | -4.877 | -4.950 | -4.951 | -4.930 | -4.747 | -3.382 | -4.821 | -4.981 | -4.981 | 58187  | CLDN10    | NM_001160099_14_+_1 |
| Zc3h14        | -4.657 | -1.144 | -4.522 | -2.915 | -2.715 | -3.269 | -1.281 | -1.378 | -4.241 | -3.453 | 75553  | ZC3H14    | NM_001160107_12_+_1 |
| Zc3h14        | -4.981 | -4.981 | -3.264 | -3.509 | -3.381 | -4.358 | -3.721 | -4.630 | -4.981 | -2.182 | 75553  | ZC3H14    | NM_001160108_12_+_1 |
| Smyd1         | -3.393 | -4.981 | -2.990 | -4.718 | -4.942 | -4.937 | -4.714 | -4.991 | -4.981 | -4.649 | 12180  | SMYD1     | NM_001160127_6_-_1  |
| Kcnq5         | -4.981 | -3.796 | -4.085 | -4.940 | -4.898 | -4.700 | -3.806 | -4.393 | -4.981 | -4.981 | 226922 | KCNQ5     | NM_001160139_1_-_1  |
| Tmem9         | -4.487 | -4.260 | -4.781 | -4.892 | -4.909 | -4.960 | -4.775 | -4.936 | -4.620 | -4.881 | 66241  | TMEM9     | NM_001160145_1_+_1  |
| Tmem9         | -0.191 | 1.262  | -3.816 | -4.081 | -0.661 | -2.955 | -3.059 | -2.211 | -3.191 | -3.827 | 66241  | TMEM9     | NM_001160146_1_+_1  |
| Cgref1        | -0.674 | -4.981 | -0.632 | -1.655 | -1.942 | -4.423 | -3.153 | -4.555 | -0.681 | -2.124 | 68567  | CGREF1    | NM_001160149_5_-_1  |
| Tor1aip2      | -0.630 | -0.362 | -0.468 | 0.146  | -0.475 | 1.376  | 1.198  | 1.315  | 1.830  | 1.926  | 240832 | TOR1AIP2  | NM_001160180_1_+_1  |
| Tor1aip2      | -1.813 | -2.734 | 0.608  | -0.595 | -1.639 | -3.745 | -1.485 | -1.892 | 1.912  | -0.709 | 240832 | TOR1AIP2  | NM_001160181_1_+_1  |
| Tor1aip2      | 3.232  | 2.310  | 3.175  | 2.705  | 2.459  | 2.462  | 0.141  | 2.372  | 1.877  | 2.269  | 240832 | TOR1AIP2  | NM_001160182_1_+_1  |
| Blzf1         | 2.183  | 3.184  | 3.629  | 3.058  | 3.388  | 3.740  | 3.472  | 3.453  | 3.520  | 2.901  | 66352  | BLZF1     | NM_001160208_1_-_1  |
| Blzf1         | 4.299  | 4.079  | 2.983  | 3.558  | 2.811  | 2.724  | 2.050  | 2.011  | 2.675  | 3.458  | 66352  | BLZF1     | NM_001160209_1_-_1  |
| Cnih3         | -4.642 | -4.518 | -4.980 | -4.980 | -4.981 | -4.981 | -4.978 | -4.796 | -4.981 | -4.981 | 72978  | CNIH3     | NM_001160211_1_+_1  |
| Cnih3         | -2.408 | -2.583 | -4.973 | -4.973 | -4.976 | -4.976 | -4.944 | -4.567 | -4.981 | -4.981 | 72978  | CNIH3     | NM_001160212_1_+_1  |
| Smek1         | 4.556  | 4.722  | 4.588  | 3.797  | 4.686  | 4.378  | 3.896  | 4.274  | 5.189  | 5.197  | 68734  | PPP4R3A   | NM_001160214_12_-_1 |
| Fcrla         | 8.361  | 8.428  | 5.331  | 2.156  | 0.390  | 2.300  | 0.770  | 4.251  | -3.597 | -1.536 | 98752  | FCRLA     | NM_001160215_1_-_1  |
| Pum2          | 0.348  | -1.910 | 0.511  | 1.399  | 0.979  | 0.970  | -0.081 | 0.163  | 1.650  | -1.700 | 80913  | PUM2      | NM_001160219_12_+_1 |
| Pum2          | -1.178 | -0.357 | -0.742 | -0.004 | -0.225 | 0.964  | 0.390  | 0.628  | 0.233  | 0.103  | 80913  | PUM2      | NM_001160220_12_+_1 |
| Pum2          | 2.381  | 2.046  | 1.175  | 0.958  | 0.462  | 0.360  | 1.008  | 0.834  | 1.132  | 2.307  | 80913  | PUM2      | NM_001160221_12_+_1 |
| Pum2          | 5.074  | 5.280  | 5.110  | 4.989  | 5.250  | 5.194  | 4.991  | 4.566  | 4.267  | 4.486  | 80913  | PUM2      | NM_001160222_12_+_1 |
| Zfp275        | 2.141  | 2.373  | 2.540  | 2.450  | 2.700  | 2.273  | 2.321  | 1.974  | 2.046  | 1.768  | 27081  | ZNF275    | NM_001160229_X_+_1  |
| Fam168b       | 3.862  | 4.522  | 4.180  | 4.271  | 4.352  | 4.618  | 3.157  | 3.742  | 2.921  | 3.031  | 214469 | FAM168B   | NM_001160235_1_-_1  |
| Fam168b       | 4.059  | 2.893  | 3.423  | 3.886  | 4.075  | 3.663  | 2.978  | 2.495  | 3.078  | 3.292  | 214469 | FAM168B   | NM_001160236_1_-_1  |
| Fau           | 5.333  | 5.152  | 5.246  | 5.280  | 5.098  | 4.976  | 5.800  | 4.994  | 4.534  | 4.323  | 14109  | FAU       | NM_001160239_19_+_1 |
| Zfp281        | 3.478  | 3.743  | 3.490  | 2.725  | 3.698  | 3.271  | 3.781  | 3.436  | 4.101  | 3.593  | 226442 | ZNF281    | NM_001160251_1_+_1  |
| Smg7          | 2.993  | -0.237 | 2.192  | 2.139  | 1.648  | 2.277  | 3.083  | 3.027  | 2.914  | 2.175  | 226517 | SMG7      | NM_001160256_1_-_1  |
| Smg7          | -0.525 | 2.308  | 3.048  | 1.432  | 3.558  | 2.717  | 2.298  | 2.050  | 3.303  | 3.353  | 226517 | SMG7      | NM_001160257_1_-_1  |
| Fam78b        | -4.981 | -4.981 | -4.976 | -3.544 | -4.847 | -4.617 | -1.290 | -0.558 | -0.588 | -1.163 | 226610 | FAM78B    | NM_001160261_1_+_1  |
| Fam78b        | -4.981 | -4.981 | -4.980 | -4.942 | -4.671 | -4.832 | 0.315  | 0.803  | 3.304  | 2.405  | 226610 | FAM78B    | NM_001160262_1_+_1  |
| Plekha6       | 0.664  | 1.282  | -1.001 | -2.479 | -4.178 | -4.057 | -1.528 | -1.252 | -0.439 | -0.467 | 240753 | NA        | NM_001160268_1_+_1  |
| Celf2         | -1.869 | 2.414  | -1.751 | -0.539 | -2.080 | -3.462 | -2.090 | -1.998 | 0.594  | -0.488 | 14007  | CELF2     | NM_001160292_2_-_1  |
| Celf2         | 2.544  | 1.509  | 1.314  | -3.442 | 2.342  | 3.197  | 1.086  | 1.696  | -2.615 | 1.588  | 14007  | CELF2     | NM_001160293_2_-_1  |
| Gm4788        | -4.981 | -4.981 | -4.966 | -4.966 | -4.981 | -4.981 | -4.963 | -4.688 | -3.608 | -2.602 | 214403 | NA        | NM_001160304_1_-_1  |
| Serp1nb10     | -2.228 | -4.981 | 0.390  | 0.409  | -2.018 | -0.505 | 0.729  | 2.838  | 2.701  | 3.753  | 241197 | SERP1NB10 | NM_001160307_1_+_1  |
| Nfasc         | -4.981 | -2.648 | -4.873 | -3.882 | -3.669 | -4.940 | -4.560 | -3.708 | -3.652 | -4.964 | 269116 | NFASC     | NM_001160316_1_-_1  |
| Nfasc         | -4.981 | -3.945 | -4.945 | -4.945 | -3.469 | -4.960 | -4.806 | -4.841 | -4.736 | -4.970 | 269116 | NFASC     | NM_001160317_1_-_1  |
| Nfasc         | -4.981 | -4.087 | -4.981 | -4.981 | -4.670 | -4.977 | -4.755 | -3.949 | -4.776 | -4.897 | 269116 | NFASC     | NM_001160318_1_-_1  |
| Ubr4          | 5.804  | 5.627  | 6.048  | 6.171  | 6.302  | 6.378  | 5.978  | 5.939  | 6.216  | 6.166  | 69116  | UBR4      | NM_001160319_4_+_1  |
| Serp2         | 1.177  | 1.165  | -3.466 | -3.757 | -3.640 | -4.059 | -4.979 | -3.936 | -4.981 | -4.981 | 72661  | SERP2     | NM_001160326_14_-_1 |
| Mocs3         | 1.726  | 1.102  | 1.490  | 1.602  | 1.161  | 1.190  | 0.759  | 0.572  | 2.111  | 2.004  | 69372  | MOC3      | NM_001160330_2_+_1  |
| Svip          | 1.246  | 2.597  | 0.378  | 3.729  | 1.801  | 5.682  | 3.489  | 5.774  | 5.339  | 7.363  | 75744  | SVIP      | NM_001160345_7_-_1  |
| Uqcc3         | 6.344  | 6.069  | 5.495  | 5.448  | 5.404  | 5.504  | 5.794  | 5.583  | 4.715  | 4.745  | 107197 | UQCC3     | NM_001160356_19_-_1 |
| A130010J15Rik | -3.434 | -3.451 | -0.393 | -1.744 | -4.657 | -2.966 | -4.441 | -4.254 | -0.397 | -4.158 | 319266 | C1orf74   | NM_001160359_1_+_1  |
| A130010J15Rik | 0.671  | 1.036  | 1.196  | -0.255 | -1.757 | -0.650 | -0.887 | -1.788 | 0.157  | 0.549  | 319266 | C1orf74   | NM_001160360_1_+_1  |
| Ssc4d         | 1.137  | 0.741  | 1.302  | 0.779  | 0.614  | -0.389 | 1.295  | -0.283 | 2.325  | 0.984  | 109267 | SSC4D     | NM_001160366_5_-_1  |

|               |        |        |        |        |        |        |        |        |        |        |        |           |                    |
|---------------|--------|--------|--------|--------|--------|--------|--------|--------|--------|--------|--------|-----------|--------------------|
| Rnf152        | -2.659 | -3.562 | -2.242 | -3.219 | -4.866 | -3.019 | -3.574 | -4.660 | -4.981 | -4.981 | 320311 | RNF152    | NM_001160368_1_-1  |
| A830018L16Rik | -4.981 | -4.981 | -4.922 | -4.922 | -3.876 | -2.528 | -4.932 | -4.392 | -4.981 | -4.981 | 320492 | C8orf34   | NM_001160369_1_+1  |
| Fam46a        | 1.328  | -0.778 | 1.128  | 1.250  | 1.753  | 0.908  | 3.355  | 2.574  | 4.717  | 3.557  | 212943 | FAM46A    | NM_001160378_9_-1  |
| Fam46a        | 5.025  | 4.614  | 4.057  | 2.975  | 4.468  | 3.242  | 6.402  | 6.322  | 7.303  | 6.950  | 212943 | FAM46A    | NM_001160379_9_-1  |
| Ccdc112       | 0.233  | -1.463 | 1.140  | 1.353  | 2.858  | 3.742  | 2.571  | 2.856  | -1.379 | 1.262  | 240261 | CCDC112   | NM_001160399_18_-1 |
| Megf8         | 2.096  | 3.565  | 2.849  | 3.409  | 2.218  | 3.487  | 1.870  | 2.915  | 1.272  | 2.515  | 269878 | MEGF8     | NM_001160400_7_+1  |
| Tm4sf19       | -3.843 | -4.981 | -4.710 | -4.133 | -2.396 | -1.221 | -2.457 | -2.632 | -4.981 | -4.342 | 277203 | TM4SF19   | NM_001160402_16_+1 |
| Galnt1        | 6.463  | 6.824  | 6.590  | 6.879  | 7.619  | 7.957  | 7.102  | 7.228  | 7.430  | 7.625  | 14423  | GALNT1    | NM_001160404_18_+1 |
| Gfi1b         | -4.981 | -4.504 | -4.906 | 1.023  | -2.634 | 0.691  | -0.520 | 1.191  | 0.002  | -1.692 | 14582  | GFI1B     | NM_001160406_2_-1  |
| Gstm4         | 2.379  | 2.419  | 0.481  | 0.591  | 1.299  | 1.901  | 1.526  | 1.111  | 1.414  | 0.224  | 14865  | GSTM4     | NM_001160411_3_-1  |
| Apoec3        | 0.285  | 3.863  | 0.019  | 5.343  | 0.682  | 4.445  | -0.610 | 4.325  | 0.078  | 4.910  | 80287  | APOEC3B   | NM_001160415_15_+1 |
| Cd300lg       | -4.582 | -4.847 | -2.613 | -3.512 | -0.917 | -1.793 | 1.003  | 1.136  | 3.074  | 3.297  | 52685  | CD300LG   | NM_001160711_11_+1 |
| Cd300lg       | -4.400 | -4.553 | -3.325 | -3.341 | -2.614 | -2.761 | 0.126  | 0.271  | 2.263  | 1.610  | 52685  | CD300LG   | NM_001160712_11_+1 |
| Cd300lg       | -2.242 | -4.769 | -1.547 | -2.001 | -1.832 | -2.764 | 1.852  | 1.496  | 4.056  | 3.265  | 52685  | CD300LG   | NM_001160713_11_+1 |
| Pqlc3         | -4.981 | -0.473 | -4.359 | -1.978 | -4.435 | -3.811 | -3.539 | -2.362 | -1.579 | -1.112 | 217430 | PQLC3     | NM_001161111_12_-1 |
| Nol11         | 1.037  | 2.594  | 2.120  | 2.018  | 1.386  | 1.921  | 1.750  | 1.573  | 0.077  | 1.548  | 68979  | NOL11     | NM_001161329_11_-1 |
| Sh3bp5l       | -0.251 | 1.077  | 2.802  | 1.595  | 1.443  | 0.322  | 1.865  | 1.461  | 3.401  | 2.796  | 79566  | SH3BP5L   | NM_001161338_11_+1 |
| Timd2         | 2.740  | 4.334  | -4.936 | -2.549 | -2.735 | -4.586 | -4.962 | -4.980 | -4.981 | -1.986 | 171284 | NA        | NM_001161355_11_-1 |
| Timd2         | -4.786 | -4.598 | -4.940 | -3.907 | -3.116 | -4.033 | -3.953 | -3.891 | -4.981 | -4.634 | 171284 | NA        | NM_001161356_11_-1 |
| Ppp2r3a       | 0.270  | 1.218  | 0.803  | 0.464  | 0.229  | -0.406 | 1.066  | 0.756  | 1.364  | 2.256  | 235542 | PPP2R3A   | NM_001161362_9_-1  |
| Rin3          | 3.824  | 3.581  | 1.082  | 1.851  | 4.637  | 2.070  | 5.047  | 3.983  | 7.002  | 6.199  | 217835 | RIN3      | NM_001161365_12_+1 |
| Tdrd6         | -4.981 | -4.981 | -4.981 | -4.981 | -4.687 | -4.826 | -4.972 | -4.977 | -4.497 | -3.936 | 210510 | TDRD6     | NM_001161366_17_-1 |
| Tdrd6         | -4.981 | -4.981 | -4.981 | -4.981 | -4.646 | -4.735 | -4.970 | -4.976 | -4.452 | -3.826 | 210510 | TDRD6     | NM_001161367_17_-1 |
| Ss18          | 4.313  | 4.860  | 5.468  | 5.625  | 5.218  | 5.400  | 5.271  | 5.614  | 6.285  | 6.231  | 268996 | SS18      | NM_001161369_18_-1 |
| Ss18          | -0.582 | 0.793  | -0.725 | -2.496 | -1.012 | -0.266 | -0.218 | -2.294 | -0.785 | -0.200 | 268996 | SS18      | NM_001161370_18_-1 |
| Ss18          | 0.373  | -0.848 | 1.433  | -0.327 | 1.110  | -0.434 | 0.672  | -0.800 | 1.584  | 1.507  | 268996 | SS18      | NM_001161371_18_-1 |
| F8            | -2.303 | -1.745 | -4.061 | -2.092 | -4.539 | -3.180 | -2.643 | -3.723 | -3.209 | -3.216 | 14069  | F8        | NM_001161373_X_-1  |
| F8            | -2.227 | -1.594 | -3.868 | -2.152 | -4.371 | -3.050 | -2.217 | -1.727 | -2.982 | -2.993 | 14069  | F8        | NM_001161374_X_-1  |
| Grhl1         | -1.313 | -0.769 | -2.086 | -1.632 | -1.936 | -0.508 | -0.587 | 0.324  | -0.504 | 0.571  | 195733 | GRHL1     | NM_001161406_12_+1 |
| Trappc12      | 4.876  | 4.052  | 4.909  | 4.634  | 4.198  | 3.821  | 4.288  | 3.190  | 5.009  | 4.366  | 217449 | TRAPPC12  | NM_001161410_12_-1 |
| Trappc12      | -1.195 | -2.978 | -0.661 | -3.981 | -0.506 | -4.020 | -0.383 | -4.001 | -0.173 | -2.621 | 217449 | TRAPPC12  | NM_001161411_12_-1 |
| Slc3a2        | 2.750  | 2.576  | 4.463  | 4.147  | 2.766  | 2.547  | 2.534  | 2.685  | 1.891  | 1.683  | 17254  | SLC3A2    | NM_001161413_19_-1 |
| Atp5g1        | 4.382  | 4.401  | 4.984  | 5.085  | 4.026  | 4.345  | 4.217  | 4.873  | 2.818  | 2.385  | 11951  | ATP5G1    | NM_001161419_11_-1 |
| Ikbkg         | -3.093 | -3.102 | -3.507 | -1.453 | -1.622 | -1.901 | -1.814 | -1.754 | -2.501 | -1.728 | 16151  | IKBK      | NM_001161421_X_+1  |
| Ikbkg         | 2.294  | 1.411  | 1.206  | 2.062  | 0.738  | -0.340 | 1.496  | 0.082  | -0.162 | 1.249  | 16151  | IKBK      | NM_001161422_X_+1  |
| Ikbkg         | 0.235  | -0.476 | 0.289  | -0.128 | -0.209 | -0.935 | 0.124  | -1.083 | -2.008 | -0.655 | 16151  | IKBK      | NM_001161423_X_+1  |
| Ikbkg         | -2.703 | -1.824 | -1.882 | -1.671 | -2.072 | -2.643 | -3.485 | -2.489 | -3.586 | -2.151 | 16151  | IKBK      | NM_001161424_X_+1  |
| Unc93b1       | 2.230  | 1.637  | 2.193  | 2.759  | -0.283 | -1.169 | -0.255 | 1.296  | 1.309  | 0.771  | 54445  | UNC93B1   | NM_001161428_19_+1 |
| Nxt2          | 1.911  | 1.761  | 1.443  | 1.526  | -0.341 | 1.360  | 0.003  | 0.736  | 0.616  | 2.861  | 237082 | NXT2      | NM_001161430_X_+1  |
| Cbfb          | 3.075  | 1.353  | 0.727  | 0.232  | 1.554  | 0.665  | 2.247  | 0.708  | 1.058  | -0.467 | 12400  | CBFB      | NM_001161456_8_+1  |
| Cbfb          | 1.891  | 0.471  | 0.839  | 1.215  | 2.323  | 1.306  | 1.466  | 0.449  | 0.336  | -0.572 | 12400  | CBFB      | NM_001161457_8_+1  |
| Cbfb          | 5.324  | 5.256  | 6.218  | 6.329  | 6.234  | 6.330  | 6.088  | 5.954  | 5.756  | 6.261  | 12400  | CBFB      | NM_001161458_8_+1  |
| Dctd          | -4.677 | -4.447 | -2.531 | -2.235 | -3.865 | -4.919 | -4.911 | -4.963 | -4.792 | -4.981 | 320685 | CDTD      | NM_001161515_8_+1  |
| Dctd          | -1.232 | 0.317  | -1.326 | -0.896 | -0.131 | 0.140  | -0.685 | 0.305  | -2.354 | -4.981 | 320685 | DCTD      | NM_001161516_8_+1  |
| Cul5          | -3.423 | 0.458  | -0.553 | -4.458 | 0.867  | -0.541 | -4.110 | -0.722 | 0.205  | -4.135 | 75717  | CUL5      | NM_001161618_9_-1  |
| Mpp7          | 0.195  | -0.214 | 0.510  | 0.854  | 0.459  | 0.833  | -0.578 | 0.471  | 0.144  | -0.876 | 75739  | MPP7      | NM_001161620_18_-1 |
| Aoc1          | -4.981 | -4.981 | -4.980 | -4.980 | -4.883 | -4.943 | -4.640 | -4.930 | -4.981 | -4.981 | 76507  | AOC1      | NM_001161621_6_+1  |
| Aoc1          | -4.981 | -4.981 | -4.977 | -4.977 | -4.738 | -4.817 | -4.245 | -4.839 | -4.981 | -4.981 | 76507  | AOC1      | NM_001161622_6_+1  |
| Cdc45         | -1.087 | -4.981 | 0.133  | -0.927 | -0.079 | -0.525 | -0.152 | -0.320 | -0.743 | -1.166 | 12544  | CDC45     | NM_001161623_16_-1 |
| Cdkn1c        | -1.762 | -3.540 | -3.940 | -2.568 | -2.903 | -2.126 | -1.775 | -0.798 | -1.530 | -4.347 | 12577  | NA        | NM_001161624_7_-1  |
| Tmem116       | -2.439 | -1.048 | -2.490 | -3.127 | -4.230 | -4.431 | -3.598 | -3.320 | -2.484 | -3.955 | 77462  | TMEM116   | NM_001161626_5_+1  |
| Tmem116       | -0.113 | 0.854  | -2.178 | -2.709 | -1.593 | -2.859 | -2.190 | -4.940 | -1.387 | -2.227 | 77462  | TMEM116   | NM_001161627_5_+1  |
| Kif26b        | -4.981 | -4.981 | -2.511 | -2.786 | -4.875 | -4.540 | -4.954 | -4.866 | -4.981 | -4.981 | 269152 | KIF26B    | NM_001161665_1_+1  |
| Gcat          | -4.662 | -0.492 | -2.615 | -4.522 | -4.901 | -2.800 | -4.869 | -1.887 | -0.705 | -4.306 | 26912  | GCAT      | NM_001161712_15_+1 |
| Tgm1          | 0.189  | -1.600 | -0.101 | 0.408  | 0.943  | -0.092 | 1.371  | 2.180  | 2.122  | 2.485  | 21816  | TGM1      | NM_001161714_14_-1 |
| Tgm1          | -4.019 | -3.828 | -4.412 | -2.113 | -4.511 | -0.704 | -3.640 | -0.804 | 0.711  | -0.101 | 21816  | TGM1      | NM_001161715_14_-1 |
| Tfeb          | 5.171  | 5.356  | 4.853  | 5.167  | 6.712  | 6.654  | 6.419  | 6.306  | 6.700  | 6.637  | 21425  | TFEB      | NM_001161722_17_+1 |
| Tfeb          | -2.820 | 0.309  | 0.720  | 1.034  | 2.456  | 2.238  | 2.749  | 1.684  | 1.485  | 0.588  | 21425  | TFEB      | NM_001161723_17_+1 |
| Ilk           | 5.692  | 5.704  | 6.258  | 6.559  | 6.424  | 6.471  | 6.074  | 6.288  | 7.432  | 7.078  | 16202  | ILK       | NM_001161724_7_+1  |
| Tap1          | -0.541 | 0.976  | 2.001  | 3.302  | 2.589  | 1.825  | 2.779  | 0.913  | 0.399  | 0.368  | 21354  | TAP1      | NM_001161730_17_+1 |
| Ang           | 2.169  | 3.000  | -2.707 | -3.579 | -2.888 | -2.685 | -0.224 | -1.376 | 2.815  | 1.487  | 11727  | ANG       | NM_001161731_14_+1 |
| Siva1         | -0.709 | 0.741  | -0.074 | -0.142 | 0.179  | -1.116 | 0.793  | 0.083  | 0.358  | 0.239  | 30954  | SIVA1     | NM_001161737_12_+1 |
| Glmn          | -1.480 | -0.094 | -2.275 | -2.719 | -1.748 | -4.703 | -0.613 | -0.450 | -1.401 | -2.684 | 170823 | GLMN      | NM_001161738_5_-1  |
| Glmn          | -4.754 | -4.331 | -4.802 | -4.832 | -4.883 | -4.977 | -4.898 | -4.952 | -1.496 | -4.910 | 170823 | GLMN      | NM_001161739_5_-1  |
| Tnfrsf12a     | -0.201 | -1.001 | -2.216 | -1.982 | -0.401 | -2.567 | -0.924 | -0.278 | 0.181  | -4.826 | 27279  | TNFRSF12A | NM_001161746_17_-1 |
| Palm          | 3.219  | 2.019  | 2.877  | 1.936  | 2.618  | 1.330  | 2.588  | 1.000  | 4.969  | 4.121  | 18483  | PALM      | NM_001161747_10_+1 |
| Fmo5          | 2.541  | 3.595  | 4.427  | 4.311  | 2.113  | 3.516  | 1.439  | 2.435  | 2.109  | 1.752  | 14263  | FMO5      | NM_001161763_3_+1  |
| Fmo5          | 3.705  | 2.708  | 5.320  | 4.249  | 3.293  | 3.836  | 3.132  | 3.186  | 3.500  | 2.014  | 14263  | FMO5      | NM_001161765_3_+1  |
| Galnt6        | 0.184  | 0.909  | 0.580  | 0.160  | 2.628  | 2.415  | 2.316  | 3.324  | 3.738  | 3.433  | 207839 | GALNT6    | NM_001161767_15_-1 |
| Galnt6        | 0.326  | -0.062 | -2.386 | -0.140 | 0.739  | 0.936  | 1.153  | -0.346 | 1.506  | 1.397  | 207839 | GALNT6    | NM_001161768_15_-1 |
| Lmo4          | 3.976  | 5.079  | 4.137  | 5.345  | 3.129  | 3.896  | 4.356  | 4.843  | 4.310  | 5.131  | 16911  | LMO4      | NM_001161769_3_-1  |
| Lmo4          | 1.432  | 1.796  | 1.991  | 3.268  | -0.094 | -0.010 | 1.657  | 1.292  | 1.634  | 1.687  | 16911  | LMO4      | NM_001161770_3_-1  |
| St3gal3       | 2.552  | 2.263  | 1.056  | 1.234  | 1.462  | 0.901  | 1.151  | -0.050 | 1.328  | 0.392  | 20441  | ST3GAL3   | NM_001161774_4_-1  |
| Myh11         | -4.981 | -4.981 | -3.705 | -1.911 | -4.955 | -4.955 | -4.976 | -3.706 | -4.981 | -4.981 | 17880  | MYH11     | NM_001161775_16_-1 |

|               |        |        |        |        |        |        |        |        |        |        |           |           |                     |
|---------------|--------|--------|--------|--------|--------|--------|--------|--------|--------|--------|-----------|-----------|---------------------|
| Trim32        | -0.110 | 0.746  | 0.342  | 0.703  | 1.266  | 0.238  | 0.671  | 0.517  | -0.173 | 0.716  | 69807     | TRIM32    | NM_001161782_4_+_1  |
| Mefv          | -2.559 | -4.981 | 5.038  | 3.656  | 5.424  | 4.753  | 5.591  | 5.215  | 5.767  | 6.299  | 54483     | MEFV      | NM_001161790_16_-_1 |
| Mefv          | -2.415 | -4.981 | 4.873  | 3.822  | 5.674  | 5.064  | 6.308  | 5.846  | 5.552  | 6.330  | 54483     | MEFV      | NM_001161791_16_-_1 |
| Gucy1b3       | -4.981 | -4.981 | -4.978 | -4.839 | -4.765 | -4.772 | -3.355 | -4.797 | -2.437 | -1.971 | 54195     | GUCY1B3   | NM_001161796_3_-_1  |
| Phactr4       | 2.112  | 2.417  | 2.198  | -0.672 | 1.420  | 1.855  | 2.347  | 0.935  | 1.798  | 1.930  | 100169    | PHACTR4   | NM_001161797_4_-_1  |
| Mthfr         | -0.473 | -1.639 | 1.922  | -0.295 | 0.031  | -0.797 | 1.439  | 1.706  | 4.430  | 2.157  | 17769     | MTHFR     | NM_001161798_4_+_1  |
| Klhl7         | -2.911 | 0.572  | -3.271 | -1.912 | -1.981 | -3.689 | -2.016 | -3.898 | -4.079 | -0.618 | 52323     | KLHL7     | NM_001161800_5_+_1  |
| Gm15455       | -4.981 | -2.389 | -4.481 | -4.959 | -4.859 | -4.899 | -3.943 | -4.916 | -4.981 | -4.167 | 433287    | NA        | NM_001161816_1_-_1  |
| Myo1b         | -4.981 | -4.981 | -4.161 | -4.663 | -1.705 | 0.213  | -2.404 | -3.064 | -4.918 | -4.849 | 17912     | MYO1B     | NM_001161817_1_-_1  |
| Zfp639        | 4.703  | 4.690  | 3.674  | 3.549  | 3.689  | 3.619  | 2.969  | 2.997  | 3.910  | 3.852  | 67778     | ZNF639    | NM_001161818_3_+_1  |
| Kdm4a         | 4.302  | 4.483  | 4.123  | 3.625  | 3.769  | 3.248  | 3.280  | 3.767  | 4.043  | 4.026  | 230674    | KDM4A     | NM_001161823_4_-_1  |
| Mtx1          | 1.071  | -0.120 | -0.001 | -0.511 | -0.671 | -1.335 | -1.325 | -0.657 | -0.702 | -2.375 | 17827     | MTX1      | NM_001161824_3_-_1  |
| Pex7          | 2.151  | 0.326  | 1.402  | -0.195 | 1.029  | -1.043 | 0.978  | -0.764 | 0.339  | -2.935 | 18634     | PEX7      | NM_001161825_10_-_1 |
| T2            | -3.349 | -3.408 | -4.950 | -4.734 | -3.880 | -4.942 | -4.043 | -4.078 | -4.981 | -4.981 | 21331     | NA        | NM_001161832_17_+_1 |
| Ptprr         | -4.745 | -4.807 | -4.981 | -4.981 | -4.981 | -4.981 | -4.981 | -4.981 | -4.832 | -4.981 | 19279     | PTPRR     | NM_001161837_10_+_1 |
| Ptprr         | -1.699 | -4.779 | -4.976 | -4.904 | -4.981 | -4.981 | -4.981 | -4.981 | -4.806 | -4.981 | 19279     | PTPRR     | NM_001161838_10_+_1 |
| Ptprr         | -1.288 | -2.160 | -4.940 | -4.940 | -4.979 | -4.955 | -4.960 | -4.971 | -2.288 | -4.981 | 19279     | PTPRR     | NM_001161839_10_+_1 |
| Ptprr         | -4.443 | -4.618 | -4.952 | -4.377 | -4.981 | -4.981 | -4.961 | -4.590 | -4.698 | -4.981 | 19279     | PTPRR     | NM_001161840_10_+_1 |
| Il18r1        | -3.615 | -4.981 | -4.914 | -4.937 | -3.903 | -2.539 | -2.298 | -1.393 | -4.981 | -4.936 | 16182     | IL18R1    | NM_001161842_1_+_1  |
| Il18r1        | -2.147 | -4.981 | -2.920 | -2.543 | -2.604 | -0.160 | -0.386 | -0.407 | -3.679 | -3.855 | 16182     | IL18R1    | NM_001161843_1_+_1  |
| Cblc          | -3.228 | -4.981 | -4.960 | -4.833 | -3.221 | -4.967 | -4.656 | -4.139 | -4.981 | -4.981 | 80794     | CBLC      | NM_001161844_7_-_1  |
| Sgk1          | -4.981 | -4.981 | 2.690  | 3.180  | 3.324  | 3.368  | 3.323  | 3.270  | 2.399  | 3.517  | 20393     | SGK1      | NM_001161845_10_+_1 |
| Sgk1          | -4.491 | -4.324 | -3.138 | -3.828 | -4.896 | -4.959 | -4.673 | -2.013 | -4.678 | -0.371 | 20393     | SGK1      | NM_001161847_10_+_1 |
| Sgk1          | 0.508  | 0.166  | -1.674 | -0.895 | -4.240 | -3.141 | -0.863 | -2.551 | -2.376 | -1.156 | 20393     | SGK1      | NM_001161848_10_+_1 |
| Sgk1          | 0.708  | -3.529 | -0.448 | -0.090 | -0.124 | -1.496 | 1.073  | 2.297  | 2.998  | 4.555  | 20393     | SGK1      | NM_001161849_10_+_1 |
| Sgk1          | -4.429 | -4.255 | 0.308  | 0.075  | -1.724 | -0.951 | 0.538  | 0.323  | 1.693  | 1.879  | 20393     | SGK1      | NM_001161850_10_+_1 |
| Fbxo44        | 1.269  | -4.259 | 0.492  | -4.145 | -0.555 | -1.716 | -0.560 | -2.465 | -4.634 | -2.691 | 230903    | FBXO44    | NM_001161851_4_-_1  |
| Fbxo44        | 0.917  | -2.577 | -0.600 | -1.560 | -0.540 | -2.573 | -0.573 | -4.934 | -4.471 | -4.945 | 230903    | FBXO44    | NM_001161852_4_-_1  |
| Smarcb1       | 5.470  | 5.369  | 5.157  | 5.384  | 5.417  | 5.312  | 5.262  | 5.376  | 4.388  | 4.787  | 20587     | SMARCB1   | NM_001161853_10_-_1 |
| Csde1         | 7.062  | 7.046  | 7.839  | 7.752  | 7.535  | 7.216  | 7.587  | 7.599  | 8.137  | 8.316  | 229663    | CSDE1     | NM_001161854_3_+_1  |
| Ptk2b         | -3.106 | -3.064 | -2.687 | -3.921 | -3.643 | -4.194 | -3.147 | -4.135 | -0.207 | -3.772 | 19229     | PTK2B     | NM_001162365_14_-_1 |
| Ptk2b         | -1.978 | -0.066 | 0.317  | -0.360 | 1.355  | 1.243  | 2.488  | 2.928  | 2.777  | 2.909  | 19229     | PTK2B     | NM_001162366_14_-_1 |
| Miga1         | 2.255  | 3.093  | 1.103  | 1.120  | 1.681  | -0.655 | -1.270 | -0.515 | 0.022  | 0.192  | 215708    | MIGA1     | NM_001162375_3_-_1  |
| Fam166b       | -4.981 | -4.981 | -3.676 | -3.231 | -4.810 | -4.789 | -4.974 | -4.645 | -4.981 | -4.981 | 329831    | FAM166B   | NM_001162381_4_-_1  |
| Pex11b        | 1.483  | 0.808  | -0.775 | -0.525 | -0.226 | -0.369 | -0.835 | -0.680 | -0.609 | -1.389 | 18632     | PEX11B    | NM_001162387_3_+_1  |
| Pex11b        | 0.553  | 0.574  | 1.104  | -0.447 | 1.141  | 0.541  | 1.094  | 1.537  | 2.108  | 1.851  | 18632     | PEX11B    | NM_001162388_3_+_1  |
| Chuk          | 4.413  | 4.497  | 5.424  | 5.648  | 4.615  | 5.007  | 4.317  | 4.195  | 4.125  | 4.194  | 12675     | CHUK      | NM_001162410_19_-_1 |
| Cysltr2       | -3.798 | -0.543 | 1.063  | -0.112 | -1.151 | -1.077 | -1.959 | -1.728 | -1.642 | -2.572 | 70086     | CYSLTR2   | NM_001162412_14_-_1 |
| Nlrp1b        | -3.237 | -0.108 | 0.878  | 2.403  | 0.205  | 2.533  | -0.244 | 2.470  | 0.942  | 4.032  | 637515    | NLRP1     | NM_001162414_11_-_1 |
| Pfkfb2        | 1.741  | 0.993  | 0.169  | 0.128  | 0.764  | -0.856 | -0.904 | 0.037  | 1.224  | 1.128  | 18640     | PFKFB2    | NM_001162415_1_-_1  |
| Pfkfb2        | -4.981 | -4.981 | -4.766 | -4.981 | -4.981 | -4.981 | -4.980 | -4.981 | -4.981 | -4.981 | 18640     | PFKFB2    | NM_001162416_1_-_1  |
| Myef2         | -1.594 | -1.524 | -1.416 | 0.019  | -0.526 | -0.562 | -1.154 | -1.041 | -0.386 | 0.158  | 17876     | MYEF2     | NM_001162417_2_-_1  |
| Myef2         | 1.709  | 0.763  | 2.422  | 2.842  | 2.584  | 2.461  | 2.157  | 2.619  | 1.406  | 1.412  | 17876     | MYEF2     | NM_001162418_2_-_1  |
| Arhgap4       | 1.267  | 1.372  | 0.722  | -2.863 | -0.036 | -1.887 | 0.359  | -1.662 | -2.413 | -0.698 | 171207    | ARHGAP4   | NM_001162423_X_-_1  |
| Arhgap4       | 3.114  | 2.818  | 3.669  | 3.894  | 4.098  | 4.474  | 3.537  | 3.958  | 4.624  | 4.198  | 171207    | ARHGAP4   | NM_001162424_X_-_1  |
| Efn1a         | -3.030 | -4.981 | -3.674 | -2.916 | -4.839 | -4.793 | -4.197 | -4.268 | -4.981 | -4.550 | 13636     | EFNA1     | NM_001162425_3_-_1  |
| Lck           | -3.653 | -3.408 | -2.421 | -3.055 | -0.777 | -1.381 | -1.961 | 0.952  | -1.860 | -0.620 | 16818     | LCK       | NM_001162432_4_-_1  |
| Lck           | 1.389  | -0.204 | -0.712 | 2.187  | 0.912  | 3.168  | 1.798  | 4.809  | -0.626 | 0.963  | 16818     | LCK       | NM_001162433_4_-_1  |
| Dtnb          | -0.501 | -1.457 | -0.920 | -1.509 | -3.068 | -2.967 | -4.702 | -2.615 | -1.504 | -1.782 | 13528     | DTNB      | NM_001162465_12_+_1 |
| Gab2          | 1.995  | 1.577  | 2.037  | 1.831  | 2.580  | 1.223  | 2.813  | 2.891  | 3.310  | 3.669  | 14389     | GAB2      | NM_001162477_7_+_1  |
| Arrdc1        | 6.767  | 7.036  | 6.718  | 6.737  | 6.769  | 6.791  | 6.742  | 6.909  | 7.066  | 7.054  | 215705    | ARRDC1    | NM_001162485_2_-_1  |
| Mroh1         | -1.125 | -1.661 | 0.162  | -0.748 | -2.016 | -2.917 | -0.839 | -4.364 | 0.043  | -0.486 | 223658    | MROH1     | NM_001162489_15_+_1 |
| Mpst          | -3.406 | -2.945 | -4.142 | -4.571 | -4.562 | -4.848 | -4.014 | -4.768 | -3.752 | -4.152 | 246221    | MPST      | NM_001162492_15_+_1 |
| Mpst          | -0.430 | -0.435 | -0.145 | -1.088 | -1.742 | -1.389 | -1.115 | -1.213 | -0.340 | -0.776 | 246221    | MPST      | NM_001162493_15_+_1 |
| Fzd6          | -2.304 | -1.997 | -2.809 | -2.950 | -2.388 | -2.694 | -3.718 | -4.116 | -4.981 | -4.981 | 14368     | FZD6      | NM_001162494_15_+_1 |
| Parvg         | -2.952 | -1.841 | 0.203  | -0.126 | 1.144  | 1.417  | -1.113 | 0.103  | -3.483 | -4.161 | 64099     | PARVG     | NM_001162500_15_+_1 |
| Sqrdl         | 0.501  | 2.276  | 0.940  | 2.392  | 0.439  | 1.370  | 4.159  | 4.565  | 7.030  | 6.765  | 59010     | SQRDL     | NM_001162503_2_+_1  |
| Troap         | -0.622 | -1.219 | -0.999 | 0.293  | -2.019 | -0.043 | -1.023 | -0.374 | -2.030 | -1.045 | 78733     | TROAP     | NM_001162506_15_+_1 |
| Dguok         | 4.625  | 4.751  | 3.672  | 3.758  | 3.881  | 3.854  | 3.587  | 3.167  | 2.093  | 2.546  | 27369     | DGUOK     | NM_001162521_6_-_1  |
| Fam174b       | 0.724  | 1.906  | -1.541 | -1.066 | -2.154 | -1.387 | 0.267  | 0.198  | -4.981 | -1.598 | 100038347 | FAM174B   | NM_001162532_7_+_1  |
| Sh3d21        | -1.617 | 0.301  | -0.722 | -1.856 | 0.022  | -0.250 | -0.206 | -2.898 | -4.967 | -4.976 | 66938     | SH3D21    | NM_001162533_4_-_1  |
| 9330159F19Rik | -4.981 | -4.981 | -4.964 | -4.823 | -4.303 | -4.880 | -4.871 | -4.933 | -4.394 | -4.316 | 212448    | KIAA0408  | NM_001162537_10_+_1 |
| Odf2l         | 0.594  | -1.334 | -1.018 | -2.262 | -1.062 | -1.011 | -1.326 | -2.867 | -4.716 | -4.786 | 52184     | ODF2L     | NM_001162538_3_+_1  |
| Odf2l         | 1.416  | 1.591  | -0.417 | -1.307 | -0.620 | -0.494 | -1.369 | -1.682 | -0.276 | -1.051 | 52184     | ODF2L     | NM_001162539_3_+_1  |
| Stk32c        | -4.981 | -4.981 | 0.603  | 0.138  | 2.691  | 3.119  | 1.320  | -0.487 | -4.981 | -4.981 | 57740     | STK32C    | NM_001162540_7_-_1  |
| Nsmce4a       | 7.443  | 7.727  | 6.751  | 6.792  | 6.851  | 6.715  | 6.833  | 6.792  | 6.393  | 6.195  | 67872     | NSMCE4A   | NM_001162855_7_-_1  |
| Nrip2         | -4.981 | 0.183  | -4.943 | -4.944 | -3.689 | -3.774 | -4.005 | -4.085 | -1.711 | -4.981 | 60345     | NRIP2     | NM_001162858_6_+_1  |
| Rab11fip3     | 1.480  | 1.730  | 2.275  | 1.747  | 1.795  | 1.877  | 1.414  | 1.263  | 0.958  | 1.469  | 215445    | RAB11FIP3 | NM_001162868_17_-_1 |
| Rab11fip3     | -3.684 | -2.745 | -2.299 | -0.866 | 0.854  | -2.227 | -2.563 | -2.024 | -4.161 | -4.469 | 215445    | RAB11FIP3 | NM_001162869_17_-_1 |
| Spast         | 3.291  | 3.545  | 3.410  | 3.505  | 3.437  | 3.209  | 3.496  | 2.489  | 3.283  | 3.848  | 50850     | SPAST     | NM_001162870_17_+_1 |
| Exoc7         | 5.705  | 5.631  | 5.384  | 5.389  | 5.324  | 5.191  | 5.178  | 5.278  | 5.579  | 5.211  | 53413     | EXOC7     | NM_001162872_11_-_1 |
| Apol9a        | -4.981 | -4.981 | -4.379 | -4.948 | -4.933 | -4.933 | -4.917 | -4.888 | -4.981 | -4.981 | 223672    | NA        | NM_001162883_15_-_1 |
| Igsf10        | -1.022 | -0.687 | -4.962 | -3.569 | -4.438 | -4.981 | -3.042 | -4.962 | -4.981 | -4.930 | 242050    | IGSF10    | NM_001162884_3_-_1  |
| 4930523C07Rik | 4.922  | 4.656  | 5.675  | 5.493  | 6.560  | 6.630  | 6.821  | 6.717  | 6.306  | 6.279  | 67647     | KIAA0040  | NM_001162896_1_+_1  |

|               |        |        |        |        |        |        |        |        |        |        |           |               |                    |
|---------------|--------|--------|--------|--------|--------|--------|--------|--------|--------|--------|-----------|---------------|--------------------|
| Tmem217       | -4.981 | -4.763 | -4.980 | -4.981 | -4.966 | -4.966 | -4.981 | -4.981 | -4.981 | -4.981 | 71138     | TMEM217       | NM_001162901_17_-1 |
| Tmem217       | -4.981 | -2.583 | -4.839 | -4.973 | -4.831 | -3.846 | -4.943 | -4.962 | -4.981 | -4.981 | 71138     | TMEM217       | NM_001162902_17_-1 |
| Ccdc71L       | 4.282  | 4.110  | 4.082  | 3.972  | 3.506  | 3.910  | 4.308  | 4.755  | 5.405  | 5.735  | 72123     | CCDC71L       | NM_001162903_12_+1 |
| Mdm1          | 0.253  | 1.255  | 0.559  | 1.747  | 1.563  | 1.303  | 2.257  | 2.483  | 2.277  | 4.403  | 17245     | MDM1          | NM_001162904_10_+1 |
| Mdm1          | 0.771  | 0.595  | 0.468  | -0.132 | 0.039  | 0.550  | 2.478  | 2.465  | 4.285  | 3.741  | 17245     | MDM1          | NM_001162905_10_+1 |
| 2410089E03Rik | 3.180  | 3.366  | 2.956  | 2.760  | 3.438  | 3.353  | 2.956  | 2.698  | 2.921  | 3.256  | 73692     | C5orf42       | NM_001162906_15_+1 |
| Sesn1         | 0.961  | 0.975  | -0.223 | 0.309  | 2.732  | 2.575  | 1.535  | 1.233  | 2.427  | 2.679  | 140742    | SESN1         | NM_001162908_10_+1 |
| Spaca6        | -3.563 | -4.981 | -4.094 | -4.009 | -4.416 | -3.315 | -3.171 | -3.875 | -4.981 | -3.167 | 75202     | NA            | NM_001162909_17_+1 |
| Gm3604        | 2.417  | 2.429  | 1.517  | 1.369  | 2.202  | 1.689  | 1.861  | 0.935  | 0.473  | 2.157  | 100041979 | NA            | NM_001162910_13_-1 |
| Zfp934        | 3.028  | 2.292  | 0.942  | 1.681  | 2.077  | 1.842  | 1.130  | 0.705  | -1.081 | 0.223  | 77117     | NA            | NM_001162911_13_-1 |
| Susd2         | -2.483 | -0.572 | -1.942 | -2.125 | -1.536 | -0.767 | -1.933 | -1.078 | -1.233 | -1.758 | 71733     | SUSD2         | NM_001162913_10_-1 |
| Dennd4a       | 5.325  | 5.118  | 6.188  | 5.752  | 6.664  | 6.700  | 5.936  | 5.812  | 6.345  | 6.453  | 102442    | DENND4A       | NM_001162917_9_+1  |
| Ccdc90b       | 1.380  | -0.185 | 1.347  | -1.005 | -0.401 | -1.854 | 0.022  | -1.589 | -0.940 | -0.987 | 66365     | CCDC90B       | NM_001162918_7_+1  |
| Pgbd1         | -3.717 | -3.655 | -4.718 | -4.654 | -4.517 | -4.843 | -4.939 | -4.856 | -4.981 | -4.808 | 319207    | PGBD1         | NM_001162919_13_-1 |
| Pgbd1         | -0.607 | 0.125  | -2.665 | -2.180 | -0.750 | 0.405  | -2.054 | -3.226 | -4.981 | -4.512 | 319207    | PGBD1         | NM_001162920_13_-1 |
| Zc3h12c       | 7.453  | 7.218  | 5.704  | 5.567  | 3.854  | 4.191  | 3.349  | 3.649  | 2.909  | 3.403  | 244871    | ZC3H12C       | NM_001162921_9_-1  |
| Zfp931        | 1.585  | 1.423  | 0.513  | 0.018  | 0.577  | 0.766  | 0.625  | 0.765  | 1.020  | 1.386  | 353208    | ZNF559-ZNF177 | NM_001162922_2_-1  |
| Rasl12        | -4.981 | -4.981 | -4.970 | -4.970 | -1.134 | -2.817 | -2.597 | -4.927 | -4.981 | -4.342 | 70784     | RASL12        | NM_001162923_9_+1  |
| Pkp3          | 0.779  | 0.685  | -0.808 | -1.658 | -0.903 | -2.275 | -1.427 | -2.993 | -2.057 | -3.122 | 56460     | PKP3          | NM_001162924_7_+1  |
| Nudt17        | -4.145 | -4.387 | 2.166  | 2.412  | 1.949  | 1.970  | 0.859  | -0.018 | -0.537 | -2.361 | 78373     | NUDT17        | NM_001162925_3_-1  |
| Fam84b        | -1.167 | -2.141 | 0.934  | 0.044  | 2.414  | 2.136  | 2.290  | 2.053  | 3.597  | 4.062  | 399603    | FAM84B        | NM_001162926_15_-1 |
| Rmi2          | -0.354 | -0.065 | 1.902  | 1.301  | 2.033  | 1.323  | 1.311  | 0.819  | 0.047  | -0.998 | 223970    | RMI2          | NM_001162932_16_+1 |
| Ifi208        | 1.091  | 0.113  | -1.362 | -0.946 | 2.037  | -0.878 | 2.454  | 1.076  | 3.876  | 0.667  | 100033459 | IFI16         | NM_001162938_1_+1  |
| Aen           | 3.789  | 3.133  | 3.280  | 2.747  | 3.892  | 2.876  | 3.860  | 3.154  | 3.171  | 3.341  | 68048     | AEN           | NM_001162939_7_+1  |
| Mapre2        | -3.316 | -3.339 | -2.065 | -4.354 | -3.331 | -4.973 | -1.526 | -0.530 | -1.104 | -3.079 | 212307    | NA            | NM_001162941_18_+1 |
| Mapre2        | -0.758 | -1.553 | -3.112 | -0.979 | -2.305 | -2.332 | -0.382 | 0.352  | 2.692  | 3.371  | 212307    | NA            | NM_001162942_18_+1 |
| Dchs1         | -1.668 | -4.981 | -4.223 | -4.919 | -2.481 | -3.562 | -1.778 | -4.174 | -4.394 | -4.981 | 233651    | DCHS1         | NM_001162943_7_-1  |
| Mtx3          | 2.348  | 2.305  | 2.047  | 2.027  | 2.186  | 2.289  | 2.141  | 1.409  | 0.696  | 0.588  | 382793    | MTX3          | NM_001162945_13_+1 |
| Pcx           | -0.164 | -0.776 | -0.356 | 0.746  | 0.178  | 0.949  | -0.538 | 0.640  | -2.094 | -1.595 | 18563     | PC            | NM_001162946_19_+1 |
| Nek3          | 0.675  | 1.214  | -0.065 | 0.037  | -2.296 | -2.394 | -1.027 | -1.219 | -4.276 | -1.231 | 23954     | NEK3          | NM_001162947_8_-1  |
| Hif3a         | -4.981 | -4.981 | -4.931 | -4.034 | -4.977 | -4.973 | -4.926 | -4.481 | -4.981 | -3.718 | 53417     | HIF3A         | NM_001162950_7_-1  |
| Gpr15         | -0.656 | -0.156 | -3.288 | -4.831 | -3.075 | -3.063 | -1.015 | 0.080  | 2.620  | 2.212  | 71223     | GPR15         | NM_001162955_16_-1 |
| Ccdc138       | 0.704  | 0.745  | 0.941  | -0.153 | 1.316  | 0.961  | 0.908  | 0.464  | 0.336  | 0.990  | 76138     | CCDC138       | NM_001162956_10_+1 |
| Rsph4a        | -4.981 | -4.981 | -3.272 | -4.243 | -4.783 | -3.178 | -4.974 | -4.885 | -4.981 | -3.386 | 212892    | RSPH4A        | NM_001162957_10_+1 |
| Sgsml         | -4.981 | -4.981 | -4.981 | -4.981 | -4.966 | -4.966 | -4.981 | -4.981 | -4.981 | -4.981 | 52850     | SGSM1         | NM_001162965_5_-1  |
| Aim1l         | -0.057 | -4.981 | -1.863 | -1.359 | -0.683 | -2.958 | -0.989 | -1.517 | -2.953 | -3.181 | 230806    | AIM1L         | NM_001162970_4_+1  |
| Lrrc51        | -0.404 | 0.709  | -1.506 | -2.469 | -2.842 | -3.650 | -2.718 | -2.246 | -2.600 | -2.932 | 69358     | NA            | NM_001162973_7_-1  |
| Lrrc51        | 0.665  | 0.470  | 0.239  | -0.565 | -0.347 | 0.315  | -0.671 | 0.086  | 0.686  | 0.148  | 69358     | NA            | NM_001162974_7_-1  |
| 1700024P16Rik | 4.865  | 4.786  | -4.971 | -4.791 | -4.976 | -4.935 | -4.949 | -4.847 | -4.981 | -4.770 | 242594    | C1orf168      | NM_001162980_4_+1  |
| Phax          | -1.447 | -0.926 | 0.036  | 0.499  | 0.149  | 1.215  | 1.135  | 0.443  | -1.101 | 0.341  | 56698     | PHAX          | NM_001162989_18_+1 |
| Eml2          | 3.924  | 3.851  | 3.822  | 3.353  | 3.846  | 3.822  | 3.347  | 3.588  | 3.981  | 4.087  | 72205     | EML2          | NM_001162996_7_+1  |
| Slim6         | 4.185  | 2.899  | -1.978 | -1.331 | -1.428 | -0.693 | -1.695 | -0.021 | 0.788  | -0.370 | 68528     | NA            | NM_001162998_11_+1 |
| Fnip2         | 1.535  | 2.329  | 5.435  | 4.990  | 0.443  | 0.297  | 2.039  | 2.249  | 3.903  | 3.968  | 329679    | FNIP2         | NM_001162999_3_-1  |
| Pkd2l2        | 0.626  | -0.308 | -1.735 | -1.443 | -0.406 | -1.268 | -1.606 | -2.132 | -0.285 | -0.509 | 53871     | PKD2L2        | NM_001163004_18_+1 |
| Minos1        | 8.563  | 8.287  | 7.807  | 7.700  | 7.767  | 7.772  | 7.822  | 7.560  | 6.571  | 6.428  | 433771    | MINOS1        | NM_001163006_4_-1  |
| Tnik          | -4.981 | -3.462 | -4.692 | -4.029 | -2.682 | -4.556 | -4.490 | -3.779 | -4.230 | -4.508 | 665113    | TNIIK         | NM_001163007_3_+1  |
| Tnik          | -4.981 | -1.501 | -3.179 | -1.364 | 0.549  | 0.657  | -2.148 | 0.421  | -2.225 | -2.427 | 665113    | TNIIK         | NM_001163008_3_+1  |
| Tnik          | -2.842 | -4.981 | -4.706 | -3.042 | -0.623 | -1.078 | -1.760 | -2.432 | -4.981 | -4.977 | 665113    | TNIIK         | NM_001163009_3_+1  |
| Ythdc2        | 3.131  | 3.391  | 3.303  | 2.760  | 3.722  | 3.064  | 3.466  | 2.770  | 4.181  | 4.011  | 240255    | YTHDC2        | NM_001163013_18_+1 |
| Gp6           | -1.321 | -4.981 | -2.382 | -2.880 | -4.538 | -3.607 | -2.949 | -3.333 | -2.088 | -2.275 | 243816    | GP6           | NM_001163014_7_-1  |
| Gprasp2       | -3.358 | -1.268 | -3.506 | -4.464 | -2.695 | -1.897 | -4.358 | -2.982 | -4.981 | -4.981 | 245607    | NA            | NM_001163015_X_+1  |
| Gprasp2       | -0.238 | 0.102  | -2.936 | -2.961 | -2.169 | -0.054 | -3.435 | -4.072 | -4.981 | -4.981 | 245607    | NA            | NM_001163016_X_+1  |
| Gprasp2       | -1.187 | -0.963 | -2.143 | -3.813 | -1.576 | -0.633 | -2.587 | -4.536 | -4.981 | -4.981 | 245607    | NA            | NM_001163017_X_+1  |
| Suz12         | 2.895  | 2.744  | 2.646  | 1.849  | 1.371  | 1.316  | 1.570  | 1.494  | 2.035  | 1.344  | 52615     | SUZ12         | NM_001163018_11_+1 |
| A430005L14Rik | 2.231  | 2.752  | 1.283  | 0.955  | 1.306  | 1.660  | 0.872  | 0.978  | 1.106  | 1.524  | 97159     | C1orf174      | NM_001163019_4_+1  |
| Klhl32        | -4.334 | -2.466 | -4.035 | -3.781 | -3.452 | -4.522 | -4.884 | -4.911 | -4.981 | -4.981 | 212390    | KLHL32        | NM_001163020_4_-1  |
| Mon2          | 1.580  | 1.596  | -0.213 | -0.258 | -0.625 | -2.767 | 0.131  | 0.558  | -4.106 | 0.298  | 67074     | MON2          | NM_001163024_10_-1 |
| Mon2          | 3.424  | 3.290  | 3.030  | 2.617  | 2.338  | 2.587  | 2.130  | 2.438  | 1.399  | 1.922  | 67074     | MON2          | NM_001163025_10_-1 |
| Dnajc13       | 5.627  | 5.547  | 5.049  | 4.825  | 4.647  | 4.515  | 4.762  | 4.862  | 5.540  | 5.923  | 235567    | DNAJC13       | NM_001163026_9_-1  |
| Adgre5        | 6.179  | 7.028  | 8.162  | 8.252  | 8.030  | 8.576  | 8.552  | 9.035  | 9.975  | 10.114 | 26364     | ADGRE5        | NM_001163029_8_-1  |
| Adgre5        | 4.664  | 5.878  | 7.322  | 7.654  | 7.157  | 7.809  | 7.318  | 8.065  | 9.046  | 9.322  | 26364     | ADGRE5        | NM_001163030_8_-1  |
| Adgre5        | 2.362  | -2.227 | 5.252  | -2.139 | 5.070  | 0.689  | 5.468  | -0.623 | 7.162  | 0.961  | 26364     | ADGRE5        | NM_001163031_8_-1  |
| Enoph1        | 0.039  | 0.659  | 0.189  | -0.262 | 0.753  | 0.588  | 0.397  | -0.784 | 0.614  | 0.404  | 67870     | ENOPH1        | NM_001163035_5_+1  |
| Haus8         | 5.129  | 5.294  | 5.978  | 6.282  | 8.717  | 8.578  | 7.402  | 6.444  | 4.881  | 4.972  | 76478     | HAUS8         | NM_001163042_8_-1  |
| Zfp949        | 0.180  | -4.981 | -0.259 | -1.281 | -2.585 | -2.726 | -2.662 | -0.402 | -1.453 | 0.522  | 71640     | NA            | NM_001163061_9_+1  |
| AU041133      | 3.004  | 2.947  | 2.490  | 2.918  | 2.504  | 3.155  | 2.557  | 2.332  | 1.975  | 2.187  | 216177    | NA            | NM_001163064_10_+1 |
| Lcorl         | 2.872  | 3.307  | 3.612  | 2.849  | 3.038  | 2.894  | 3.416  | 2.694  | 2.814  | 3.053  | 209707    | LCORL         | NM_001163073_5_-1  |
| Map3k15       | -0.806 | -4.981 | 0.276  | -0.960 | -2.187 | -1.681 | 2.010  | 2.619  | 4.591  | 5.171  | 270672    | MAP3K15       | NM_001163085_X_+1  |
| Tchh          | -4.981 | -4.981 | -4.981 | -4.981 | -4.721 | -2.916 | -2.773 | -4.948 | 0.539  | 1.378  | 99681     | NA            | NM_001163098_3_+1  |
| Eme2          | 2.937  | 3.344  | 3.179  | 3.390  | 3.088  | 3.279  | 2.542  | 2.720  | 2.409  | 1.698  | 193838    | EME2          | NM_001163102_17_-1 |
| Ppp1r36       | -4.981 | -4.981 | -3.389 | -2.212 | -4.983 | -4.926 | -4.981 | -3.962 | -4.981 | -4.981 | 210762    | PPP1R36       | NM_001163103_12_+1 |
| Cog5          | 3.825  | 3.930  | 3.916  | 3.736  | 4.016  | 4.036  | 3.939  | 3.918  | 3.779  | 3.937  | 238123    | COG5          | NM_001163126_12_+1 |
| Macc1         | -4.981 | -2.239 | -3.357 | -0.987 | -4.919 | -4.919 | -4.968 | -4.951 | -4.981 | -4.981 | 238455    | MACC1         | NM_001163136_12_+1 |
| Card6         | 4.965  | 3.870  | 2.010  | 1.601  | 3.139  | 3.209  | 3.283  | 3.189  | 3.478  | 3.313  | 239319    | CARD6         | NM_001163138_15_-1 |

|               |        |        |        |        |        |        |        |        |        |        |           |           |                    |
|---------------|--------|--------|--------|--------|--------|--------|--------|--------|--------|--------|-----------|-----------|--------------------|
| Pcsk5         | -2.388 | -4.981 | 3.847  | 2.723  | -4.953 | -4.551 | -4.931 | -4.957 | -4.981 | -4.981 | 18552     | PCSK5     | NM_001163144_19_-1 |
|               | -4.981 | -4.981 | -4.930 | -4.930 | -4.764 | -2.086 | -4.373 | -4.959 | -4.981 | -4.981 | 72301     | KIAA1644  | NM_001163145_15_-1 |
| 1810041L15Rik | -3.797 | -3.860 | -2.813 | -4.979 | -2.641 | -3.986 | -4.154 | -4.098 | -0.594 | 0.068  | 14009     | ETV1      | NM_001163154_12_+1 |
| Etv1          | -4.463 | -4.981 | -4.981 | -4.981 | -3.550 | -4.780 | -4.824 | -4.866 | -4.981 | -4.981 | 12830     | COL4A5    | NM_001163155_X_+1  |
| Col4a5        | 3.237  | 3.622  | 2.136  | 2.194  | 3.818  | 3.864  | 3.462  | 3.650  | 3.360  | 2.807  | 13026     | PCYT1A    | NM_001163159_16_+1 |
| Pcyt1a        | 2.403  | 2.879  | 0.841  | 0.305  | 2.770  | 2.888  | 2.119  | 1.274  | 2.825  | 1.682  | 13026     | PCYT1A    | NM_001163160_16_+1 |
| Pcyt1a        | -4.981 | -4.981 | -5.016 | -2.002 | -2.567 | -2.339 | -1.110 | -1.694 | 0.445  | 0.404  | 17474     | CLEC4D    | NM_001163161_6_+1  |
| Clec4d        | 1.144  | -0.387 | 1.176  | 0.243  | -0.449 | -0.365 | -0.508 | -1.050 | -4.554 | 0.555  | 15353     | HMG20B    | NM_001163165_10_-1 |
| Hmg20b        | 3.248  | 2.948  | 1.996  | 2.152  | 3.174  | 2.693  | 3.058  | 2.583  | 3.559  | 3.520  | 15353     | HMG20B    | NM_001163166_10_-1 |
| Hmg20b        | -3.668 | -0.479 | 0.200  | -0.623 | -1.510 | -1.622 | -0.380 | -1.140 | -2.490 | -1.791 | 280411    | LIX1L     | NM_001163170_3_+1  |
| Lix1l         | 0.020  | 1.367  | -4.936 | -4.387 | -4.974 | -3.536 | -4.958 | -3.928 | -4.981 | -4.981 | 380785    | BEGAIN    | NM_001163175_12_-1 |
| Begain        | -3.276 | -4.741 | -4.952 | -4.978 | -4.973 | -4.980 | -4.981 | -4.981 | -4.928 | -4.965 | 27276     | PLEKHB1   | NM_001163182_7_-1  |
| Plekhhb1      | -4.981 | -4.657 | -4.933 | -4.976 | -4.966 | -4.978 | -4.980 | -4.975 | -4.890 | -4.951 | 27276     | PLEKHB1   | NM_001163183_7_-1  |
| Plekhhb1      | -4.981 | -3.994 | -4.739 | -4.902 | -4.839 | -4.926 | -4.957 | -4.864 | -4.521 | -4.791 | 27276     | PLEKHB1   | NM_001163184_7_-1  |
| Plekhhb1      | -4.981 | -3.796 | -4.685 | -4.865 | -4.795 | -4.853 | -4.963 | -4.980 | -4.415 | -4.737 | 27276     | PLEKHB1   | NM_001163185_7_-1  |
| Plekhhb1      | -4.981 | -4.628 | -4.928 | -4.976 | -4.964 | -4.977 | -4.981 | -4.981 | -4.877 | -4.946 | 27276     | PLEKHB1   | NM_001163186_7_-1  |
| Plekhhb1      | -4.981 | -3.810 | -4.694 | -4.869 | -4.799 | -4.860 | -4.964 | -4.980 | -4.429 | -4.743 | 27276     | PLEKHB1   | NM_001163187_7_-1  |
| Enthd1        | -4.981 | -4.981 | -2.097 | -1.772 | -2.769 | -4.096 | -3.111 | -3.730 | -3.322 | -1.766 | 383075    | ENTHD1    | NM_001163189_15_-1 |
| Ly6g6f        | -4.981 | -4.981 | -3.385 | -2.964 | -4.943 | -4.943 | -4.978 | -3.634 | -2.267 | -2.923 | 433099    | LY6G6F    | NM_001163192_17_-1 |
| Fgfr3         | -4.736 | -4.981 | -3.678 | -4.826 | -4.405 | -4.813 | -4.171 | -4.919 | -4.981 | -4.935 | 14184     | FGFR3     | NM_001163215_5_+1  |
| Fgfr3         | -3.306 | -4.981 | -2.850 | -2.046 | -0.322 | -0.922 | -0.378 | -2.477 | -4.981 | -3.598 | 14184     | FGFR3     | NM_001163216_5_+1  |
| Fgfr3         | -4.161 | -4.981 | -4.341 | -1.867 | -2.338 | -2.676 | -3.140 | -4.864 | -4.981 | -4.634 | 14184     | FGFR3     | NM_001163217_5_+1  |
| Fancg         | -1.468 | 3.383  | -0.562 | -0.424 | 0.120  | 1.902  | 0.241  | -0.915 | 0.360  | -0.857 | 60534     | FANCG     | NM_001163233_4_-1  |
| Nqo2          | -1.075 | 1.419  | 0.946  | 1.714  | 0.193  | 0.018  | 0.703  | 0.550  | 2.017  | 2.073  | 18105     | NQO2      | NM_001163239_13_+1 |
| Nqo2          | 3.315  | 3.676  | 4.200  | 4.339  | 2.757  | 2.929  | 3.755  | 3.893  | 5.141  | 5.356  | 18105     | NQO2      | NM_001163241_13_+1 |
| Nqo2          | -3.403 | -3.742 | -3.887 | -4.512 | -1.327 | -4.245 | -3.498 | -4.840 | -3.743 | -3.923 | 18105     | NQO2      | NM_001163242_13_+1 |
| Fis1          | 2.032  | 3.843  | 3.122  | 3.624  | 1.453  | 2.900  | 3.292  | 3.958  | 4.388  | 4.547  | 66437     | FIS1      | NM_001163243_5_+1  |
| Zfp729b       | 3.466  | 3.616  | 3.622  | 3.562  | 3.837  | 3.824  | 3.673  | 3.681  | 3.523  | 4.298  | 100416706 | ZNF729    | NM_001163246_13_-1 |
| Fblim1        | -0.744 | -2.306 | -1.715 | -1.129 | -1.011 | -1.152 | -1.163 | -0.850 | -3.398 | -4.981 | 74202     | FBLM1     | NM_001163256_4_-1  |
| Cmip          | 4.711  | 4.600  | 5.620  | 5.435  | 6.320  | 6.265  | 6.288  | 6.227  | 7.096  | 6.897  | 74440     | CMIP      | NM_001163262_8_+1  |
| Rnf20         | 3.858  | 2.177  | 4.258  | 4.159  | 3.961  | 3.936  | 3.390  | 3.620  | 4.512  | 4.380  | 109331    | RNF20     | NM_001163263_4_+1  |
| Lsm10         | 2.923  | 1.716  | 1.980  | 1.499  | 0.873  | -1.621 | 2.374  | 1.743  | 2.046  | 1.389  | 116748    | LSM10     | NM_001163266_4_+1  |
| Cfap58        | -4.981 | -4.981 | -3.708 | -4.943 | -4.890 | -4.970 | -4.229 | -4.975 | -4.981 | -4.981 | 381229    | CFAP58    | NM_001163267_19_+1 |
| Lpar5         | 2.225  | 2.356  | 2.685  | 2.495  | 2.777  | 2.654  | 3.160  | 3.337  | 4.212  | 4.315  | 381810    | LPAR5     | NM_001163268_6_+1  |
| Lpar5         | -0.849 | -2.124 | 1.608  | 1.397  | 1.322  | -0.081 | -1.302 | -4.706 | -1.975 | -3.324 | 381810    | LPAR5     | NM_001163269_6_+1  |
| Baiap3        | -2.980 | -4.981 | -2.497 | -3.537 | -3.014 | -4.172 | -2.225 | -3.900 | -0.671 | -4.185 | 545192    | BAIAP3    | NM_001163270_17_-1 |
| Med16         | 4.181  | 3.741  | 1.896  | 1.246  | 2.090  | 1.047  | 1.056  | 1.467  | 1.579  | 1.663  | 216154    | MED16     | NM_001163276_10_-1 |
| Gdf1          | -1.537 | -1.782 | -4.968 | -4.968 | -4.978 | -4.753 | -4.981 | -4.981 | -4.981 | -4.981 | 14559     | GDF1      | NM_001163282_8_+1  |
| Zbtb5         | 0.270  | 0.221  | 0.445  | 0.339  | -0.563 | -1.975 | -1.506 | 0.341  | -4.222 | -4.422 | 230119    | ZBTB5     | NM_001163283_4_-1  |
| Zbtb5         | 0.456  | 1.181  | 2.716  | 2.453  | 0.553  | 0.824  | 0.220  | 0.366  | 0.454  | 0.889  | 230119    | ZBTB5     | NM_001163284_4_-1  |
| Susd1         | 2.960  | 2.651  | 2.520  | 1.932  | 1.600  | 0.999  | 1.515  | 2.074  | 1.563  | 1.435  | 634731    | SUSD1     | NM_001163288_4_-1  |
| Coq8a         | -0.376 | 3.342  | 2.178  | 0.881  | 3.318  | 4.190  | 2.907  | 2.573  | 0.790  | 1.269  | 67426     | COQ8A     | NM_001163290_1_-1  |
| Safb          | 5.356  | 5.567  | 5.596  | 5.636  | 5.904  | 6.028  | 5.711  | 5.569  | 5.940  | 5.899  | 224903    | SAFB      | NM_001163300_17_+1 |
| Pex2          | 4.647  | 4.682  | 4.416  | 4.446  | 3.830  | 4.003  | 4.167  | 4.266  | 3.702  | 4.265  | 19302     | PEX2      | NM_001163301_3_-1  |
| Pex2          | 1.459  | -0.781 | -0.942 | -1.309 | -0.667 | -1.116 | 0.160  | 0.684  | 0.094  | -0.407 | 19302     | PEX2      | NM_001163302_3_-1  |
| Pex2          | 2.389  | 2.839  | 1.413  | 0.818  | 0.605  | 0.258  | 0.444  | 1.012  | -0.438 | 1.747  | 19302     | PEX2      | NM_001163305_3_-1  |
| Pex2          | 2.655  | 2.524  | 1.727  | 2.029  | 1.362  | 1.173  | 0.971  | 1.955  | 1.373  | 2.129  | 19302     | PEX2      | NM_001163306_3_-1  |
| Pcgf2         | -4.703 | -3.943 | -4.555 | -4.808 | -4.800 | -4.909 | -4.099 | -4.882 | -4.919 | -4.776 | 22658     | PCGF2     | NM_001163307_11_-1 |
| Pcgf2         | -3.563 | -1.078 | -2.039 | -1.858 | -2.920 | -3.238 | -2.910 | -2.755 | -3.242 | -2.392 | 22658     | PCGF2     | NM_001163308_11_-1 |
| Rit1          | -4.596 | -4.367 | -4.500 | -2.767 | -3.102 | -4.927 | -4.546 | -1.700 | -1.328 | -2.272 | 19769     | RIT1      | NM_001163310_3_+1  |
| Srr           | 2.383  | 2.179  | 1.670  | 2.578  | 1.540  | 0.362  | 0.879  | 0.517  | 1.874  | 1.816  | 27364     | SRR       | NM_001163311_11_-1 |
| Pgap1         | -1.777 | -0.275 | 1.435  | 1.253  | 4.522  | 4.598  | 3.601  | 3.613  | 3.757  | 4.426  | 241062    | PGAP1     | NM_001163314_1_-1  |
| Get4          | -0.210 | 1.270  | 0.787  | -1.461 | 0.100  | -0.796 | -0.626 | -4.070 | -2.473 | -1.521 | 67604     | GET4      | NM_001163316_5_+1  |
| Gm11744       | -4.981 | -1.786 | -4.481 | 0.719  | 0.092  | 3.156  | -1.013 | 2.079  | -4.981 | -1.594 | 100038570 | NA        | NM_001163318_11_+1 |
| Tubgcp6       | 2.936  | 2.965  | 3.073  | 2.788  | 3.947  | 3.204  | 3.418  | 3.187  | 3.989  | 3.952  | 328580    | TUBGCP6   | NM_001163319_15_-1 |
| Cttnbp2nl     | 3.542  | 2.474  | 5.034  | 5.032  | 0.887  | 0.599  | 2.455  | 2.977  | 1.815  | 2.950  | 80281     | CTTNBP2NL | NM_001163332_3_-1  |
| Cttnbp2nl     | -0.486 | -2.564 | 0.004  | -0.901 | -3.397 | -2.985 | -0.704 | -3.116 | -1.450 | -1.036 | 80281     | CTTNBP2NL | NM_001163333_3_-1  |
| Atp2a3        | 5.016  | 5.027  | 3.461  | 3.210  | 5.141  | 4.122  | 3.881  | 4.323  | 6.451  | 5.830  | 53313     | ATP2A3    | NM_001163336_11_+1 |
| Atp2a3        | -1.031 | 1.800  | 0.131  | 1.256  | 0.675  | 0.121  | 2.132  | 0.743  | 2.773  | 1.824  | 53313     | ATP2A3    | NM_001163337_11_+1 |
| Cdc42ep4      | -0.534 | -1.606 | 2.865  | 2.684  | 2.186  | 1.872  | 3.502  | 3.571  | 6.083  | 5.733  | 56699     | CDC42EP4  | NM_001163346_11_-1 |
| Rhot1         | 3.916  | 4.142  | 3.294  | 3.707  | 3.650  | 3.808  | 3.891  | 3.167  | 4.000  | 4.486  | 59040     | RHOT1     | NM_001163354_11_+1 |
| Rhot1         | 3.369  | 2.687  | 3.163  | 2.327  | 3.217  | 3.219  | 3.024  | 2.514  | 3.085  | 2.776  | 59040     | RHOT1     | NM_001163355_11_+1 |
| Fam212b       | -2.541 | -1.041 | -3.799 | -2.401 | -1.723 | -3.725 | -1.494 | -3.181 | -1.935 | -2.668 | 109050    | FAM212B   | NM_001163356_3_+1  |
| Figln1        | -3.986 | -2.571 | 0.659  | -0.085 | 1.819  | 0.986  | 0.991  | 0.902  | -0.265 | -2.418 | 60530     | FIGLN1    | NM_001163359_11_-1 |
| Figln1        | 0.014  | -0.902 | 0.716  | 0.351  | 0.440  | -1.292 | -0.215 | 0.718  | -0.177 | -3.036 | 60530     | FIGLN1    | NM_001163360_11_-1 |
| 2700049A03Rik | 2.893  | 3.169  | 0.587  | 1.505  | 2.314  | 1.974  | 0.999  | 1.897  | 2.699  | 2.451  | 76967     | KIAA0586  | NM_001163378_12_+1 |
| Agpat1        | 1.777  | 1.101  | 2.927  | 2.526  | 2.234  | 2.796  | 1.864  | 2.174  | 1.906  | 2.242  | 55979     | AGPAT1    | NM_001163379_17_+1 |
| Apopt1        | 1.654  | 1.654  | 0.210  | -0.544 | -0.431 | -0.870 | 0.027  | -0.247 | 0.828  | 0.113  | 68020     | APOPT1    | NM_001163388_12_+1 |
| Snx11         | 3.074  | 2.688  | 2.591  | 2.614  | 3.366  | 3.537  | 2.354  | 2.481  | 2.821  | 2.726  | 74479     | SNX11     | NM_001163389_11_-1 |
| Evl           | -1.621 | 0.444  | -0.585 | -0.168 | 0.484  | 0.303  | -0.289 | 0.803  | 0.784  | 0.210  | 14026     | EVL       | NM_001163394_12_+1 |
| Evl           | 2.920  | 3.422  | 4.687  | 4.781  | 3.792  | 3.969  | 4.222  | 3.982  | 2.900  | 3.655  | 14026     | EVL       | NM_001163395_12_+1 |
| Evl           | 5.700  | 5.594  | 6.942  | 7.179  | 6.382  | 6.681  | 6.437  | 6.575  | 5.966  | 5.931  | 14026     | EVL       | NM_001163396_12_+1 |
| Elavl4        | -4.981 | -4.981 | -4.440 | -3.108 | -3.070 | -1.190 | -2.974 | -4.979 | -4.981 | -4.981 | 15572     | ELAVL4    | NM_001163397_4_-1  |
| Elavl4        | -4.981 | -4.981 | -4.935 | -4.975 | -1.941 | -1.436 | -3.197 | -4.894 | -4.981 | -4.981 | 15572     | ELAVL4    | NM_001163399_4_-1  |

|               |        |        |        |        |        |        |        |        |        |        |        |          |                     |
|---------------|--------|--------|--------|--------|--------|--------|--------|--------|--------|--------|--------|----------|---------------------|
| Il11ra1       | 6.338  | 1.521  | 3.945  | 1.791  | 2.516  | -1.943 | 3.410  | 0.592  | 3.229  | 2.011  | 16157  | IL11RA   | NM_001163401_4_+_1  |
| Ppp2r3d       | -0.336 | -0.053 | -0.862 | -1.040 | -1.169 | -1.740 | -0.832 | -0.953 | -0.669 | -0.394 | 19054  | NA       | NM_001163415_9_-_1  |
| Fam172a       | 4.831  | 5.748  | 4.821  | 5.089  | 5.284  | 5.508  | 5.472  | 5.363  | 5.179  | 5.133  | 68675  | FAM172A  | NM_001163419_13_+_1 |
| Fam172a       | -4.920 | -0.468 | -1.507 | -0.594 | -1.711 | 0.242  | -1.938 | -0.617 | -0.086 | -1.650 | 68675  | FAM172A  | NM_001163420_13_+_1 |
| Tatdn3        | -4.892 | -4.981 | -4.798 | -3.441 | -3.687 | -2.828 | -4.871 | -4.966 | -4.843 | -4.966 | 68972  | TATDN3   | NM_001163421_1_-_1  |
| Tatdn3        | 0.548  | -1.703 | 0.268  | -2.802 | 0.756  | -2.878 | -0.432 | -4.869 | -0.636 | -4.816 | 68972  | TATDN3   | NM_001163422_1_-_1  |
| Myeov2        | 7.148  | 7.129  | 7.408  | 7.425  | 7.224  | 7.168  | 7.415  | 7.088  | 6.324  | 6.202  | 66915  | COPS9    | NM_001163425_1_-_1  |
| Pradc1        | 3.106  | 2.944  | 2.823  | 2.922  | 1.973  | 1.860  | 1.671  | 2.811  | 2.152  | 1.320  | 73327  | PRADC1   | NM_001163427_6_-_1  |
| Sirt6         | 2.068  | 2.275  | 0.807  | 1.058  | 0.704  | 0.791  | 0.821  | 0.337  | -0.900 | 1.206  | 50721  | SIRT6    | NM_001163430_10_-_1 |
| Tmem258       | 2.067  | 1.822  | 0.521  | 0.089  | -0.536 | -0.672 | 0.677  | 0.292  | 0.366  | -0.823 | 69038  | TMEM258  | NM_001163431_19_+_1 |
| Clk2          | 2.987  | 2.348  | 3.313  | 3.396  | 2.791  | 2.592  | 3.381  | 2.057  | 2.744  | 2.786  | 12748  | CLK2     | NM_001163432_3_+_1  |
| Samd4         | -1.943 | -2.201 | -3.965 | -3.784 | -3.190 | -2.751 | -2.386 | -3.608 | -4.981 | -3.572 | 74480  | SAMD4A   | NM_001163433_14_+_1 |
| Hspa5         | 9.799  | 9.897  | 10.058 | 10.405 | 9.265  | 9.589  | 9.313  | 10.071 | 8.941  | 9.738  | 14828  | HSPA5    | NM_001163434_2_+_1  |
| Mov10         | -3.616 | 0.193  | -3.538 | -1.505 | -0.962 | -0.167 | -3.509 | -4.575 | -3.793 | -4.105 | 17454  | MOV10    | NM_001163440_3_-_1  |
| Mov10         | 1.533  | 0.437  | 2.209  | 1.450  | 3.623  | 2.907  | 2.909  | 2.153  | 3.024  | 2.710  | 17454  | MOV10    | NM_001163441_3_-_1  |
| Smim10l1      | 6.252  | 5.175  | 4.934  | 4.255  | 5.251  | 4.162  | 5.498  | 4.106  | 4.589  | 4.197  | 381820 | SMIM10L1 | NM_001163445_6_+_1  |
| Mapk8ip3      | 0.615  | -2.492 | -1.952 | -0.535 | 0.377  | 0.041  | -0.852 | 0.030  | 1.095  | 0.368  | 30957  | MAPK8IP3 | NM_001163447_17_-_1 |
| Mapk8ip3      | 3.743  | 4.131  | 2.588  | 2.785  | 3.174  | 3.187  | 3.494  | 2.000  | 2.672  | 2.929  | 30957  | MAPK8IP3 | NM_001163448_17_-_1 |
| Mapk8ip3      | -0.710 | -0.525 | -2.106 | -3.864 | -1.551 | -3.684 | -1.527 | -4.591 | -3.247 | -3.640 | 30957  | MAPK8IP3 | NM_001163449_17_-_1 |
| Mapk8ip3      | 1.398  | 1.677  | 0.812  | -0.173 | 0.741  | 0.404  | 0.223  | -0.900 | 0.267  | -0.725 | 30957  | MAPK8IP3 | NM_001163450_17_-_1 |
| Mapk8ip3      | 0.535  | 0.604  | 0.106  | -0.675 | 0.804  | 0.796  | -1.353 | 1.588  | -1.233 | -1.770 | 30957  | MAPK8IP3 | NM_001163451_17_-_1 |
| Trpc4ap       | 6.656  | 6.388  | 7.711  | 7.810  | 7.153  | 7.097  | 7.101  | 7.340  | 8.175  | 8.356  | 56407  | TRPC4AP  | NM_001163452_2_-_1  |
| Mapk8ip3      | 2.565  | 2.697  | 2.619  | 2.288  | 3.489  | 4.044  | 3.038  | 3.275  | 4.247  | 4.005  | 30957  | MAPK8IP3 | NM_001163453_17_-_1 |
| Prorsd1       | 4.380  | 2.888  | 3.619  | 3.006  | 3.979  | 2.982  | 3.578  | 2.043  | 2.419  | 0.997  | 67939  | NA       | NM_001163454_11_-_1 |
| Tbck          | 4.752  | 4.761  | 4.260  | 4.411  | 4.985  | 4.874  | 4.474  | 4.373  | 3.975  | 4.286  | 271981 | TBCK     | NM_001163455_3_+_1  |
| Cox18         | 3.235  | 3.858  | 2.662  | 3.737  | 2.957  | 3.764  | 2.606  | 3.261  | 1.724  | 2.620  | 231430 | COX18    | NM_001163456_5_-_1  |
| Mttp          | -1.049 | 0.178  | -1.519 | -1.489 | -1.577 | -1.207 | -1.515 | -1.463 | -1.495 | -1.749 | 17777  | MTTP     | NM_001163457_3_-_1  |
| Rpap2         | 1.916  | 1.030  | 1.607  | -0.048 | 1.404  | -2.638 | 1.433  | -0.731 | 1.338  | -0.549 | 231571 | RPAP2    | NM_001163461_5_+_1  |
| Rpap2         | 0.975  | -4.054 | -3.334 | -2.679 | -4.622 | -1.979 | -2.689 | -3.266 | -0.233 | -4.898 | 231571 | RPAP2    | NM_001163462_5_+_1  |
| Abi3          | -3.970 | -3.448 | -4.571 | -2.873 | -1.939 | 0.160  | -0.011 | -4.808 | -1.432 | -4.491 | 66610  | ABI3     | NM_001163464_11_-_1 |
| Rhpn1         | -4.433 | -4.981 | 2.340  | 1.140  | 0.285  | -1.105 | -1.599 | -4.793 | -4.981 | -2.969 | 14787  | RHPN1    | NM_001163465_15_+_1 |
| Phtf1         | 1.797  | 2.528  | 1.927  | 0.374  | 1.644  | 0.066  | -0.091 | 0.915  | 2.027  | 2.135  | 18685  | PHTF1    | NM_001163467_3_+_1  |
| Phtf1         | 1.916  | 2.067  | 2.314  | 1.246  | 2.165  | 1.280  | 1.471  | 1.891  | 0.990  | 0.641  | 18685  | PHTF1    | NM_001163468_3_+_1  |
| Phtf1         | 2.647  | 2.474  | 2.031  | 2.048  | 2.866  | 2.688  | 1.402  | -1.089 | -0.531 | 0.592  | 18685  | PHTF1    | NM_001163469_3_+_1  |
| Traf1         | 3.569  | 3.540  | 6.958  | 6.657  | 5.805  | 5.603  | 5.967  | 5.516  | 7.272  | 6.840  | 231712 | TRAF1    | NM_001163470_5_-_1  |
| Hectd2        | -2.999 | -4.981 | -0.139 | -3.104 | 0.471  | -0.313 | -0.328 | -2.727 | -1.307 | -3.298 | 226098 | HECTD2   | NM_001163471_19_+_1 |
| Cyp2d22       | -4.981 | -3.615 | -3.433 | -3.787 | -4.082 | -4.318 | -3.080 | -2.554 | -3.194 | -3.140 | 56448  | NA       | NM_001163472_15_-_1 |
| 1810010H24Rik | 0.783  | 0.528  | -1.103 | -0.869 | -1.736 | -2.240 | -2.989 | -0.947 | -0.129 | -1.051 | 69066  | C17orf58 | NM_001163473_11_+_1 |
| Zfp746        | 4.226  | 4.260  | 4.601  | 4.115  | 4.691  | 4.211  | 4.699  | 4.062  | 4.852  | 4.792  | 69228  | ZNF746   | NM_001163475_6_-_1  |
| Gins1         | -4.981 | -4.981 | -4.037 | -3.781 | -2.772 | -4.971 | -3.660 | -4.261 | -4.981 | -4.981 | 69270  | GINS1    | NM_001163476_2_+_1  |
| Rabgggtb      | 3.372  | 4.145  | 3.450  | 3.690  | 3.171  | 3.114  | 2.946  | 2.797  | 1.782  | 2.370  | 19352  | RABGGTB  | NM_001163478_3_-_1  |
| Rabgggtb      | 1.414  | -0.001 | -0.288 | -2.658 | -0.562 | -0.998 | -0.939 | -0.544 | 0.527  | -0.068 | 19352  | RABGGTB  | NM_001163479_3_-_1  |
| Neurl1a       | -0.484 | -3.267 | -2.432 | -0.702 | -0.604 | 0.741  | -2.785 | -2.026 | -4.394 | -4.342 | 18011  | NEURL1   | NM_001163480_19_+_1 |
| Fkbp10        | -2.149 | -4.981 | -0.662 | -1.403 | -4.702 | -4.944 | -4.968 | -4.690 | -4.981 | -4.981 | 14230  | FKBP10   | NM_001163481_11_+_1 |
| Rpl30         | 4.285  | 3.215  | 3.759  | 2.234  | 2.666  | 1.282  | 3.437  | 2.438  | 2.156  | 0.270  | 19946  | RPL30    | NM_001163485_15_-_1 |
| Hsd17b13      | -1.469 | -0.310 | -4.738 | -3.340 | -3.852 | -1.589 | -3.423 | -1.839 | -4.981 | -4.981 | 243168 | HSD17B13 | NM_001163486_5_-_1  |
| Pfkm          | 0.619  | 2.172  | 0.768  | 0.540  | 0.489  | 0.778  | -0.333 | 0.691  | 2.108  | 2.458  | 18642  | PFKM     | NM_001163487_15_+_1 |
| Pfkm          | 0.989  | 0.923  | 0.266  | 1.614  | 0.204  | 0.740  | 0.674  | 1.980  | 1.125  | -1.693 | 18642  | PFKM     | NM_001163488_15_+_1 |
| Sema4a        | 1.459  | -0.647 | 6.755  | 6.698  | 2.520  | 1.601  | 5.530  | 6.291  | 8.051  | 7.976  | 20351  | SEMA4A   | NM_001163489_3_-_1  |
| Sema4a        | -3.199 | -3.138 | -0.210 | -0.615 | -4.178 | -4.761 | -1.955 | -1.288 | 0.243  | 0.293  | 20351  | SEMA4A   | NM_001163490_3_-_1  |
| Sema4a        | -1.565 | -2.501 | 3.031  | 3.511  | 0.187  | 0.780  | 2.282  | 2.676  | 3.969  | 3.887  | 20351  | SEMA4A   | NM_001163491_3_-_1  |
| Stard13       | -4.981 | -1.681 | -2.056 | -3.966 | -4.980 | -4.924 | -4.867 | -4.973 | -4.981 | -4.981 | 243362 | STARD13  | NM_001163493_5_-_1  |
| Arhgap19      | -2.950 | 0.854  | 0.293  | -1.286 | -2.147 | -0.981 | -0.461 | -1.695 | 1.611  | 0.922  | 71085  | ARHGA19  | NM_001163495_19_-_1 |
| Cd160         | -3.861 | -3.598 | -4.574 | -4.737 | -4.644 | -4.920 | -4.779 | -4.873 | -4.796 | -4.680 | 54215  | CD160    | NM_001163496_3_-_1  |
| Cd160         | -4.981 | -1.131 | -0.663 | -2.394 | -4.094 | -3.362 | -3.159 | -2.743 | -1.492 | -0.476 | 54215  | CD160    | NM_001163497_3_-_1  |
| Elmsan1       | 2.925  | 3.454  | 3.148  | 2.995  | 4.399  | 3.725  | 4.252  | 3.786  | 5.182  | 4.750  | 238317 | ELMSAN1  | NM_001163501_12_-_1 |
| Elmsan1       | 4.236  | 3.698  | 4.200  | 4.048  | 5.441  | 5.300  | 4.495  | 4.226  | 3.867  | 4.167  | 238317 | ELMSAN1  | NM_001163502_12_-_1 |
| Nr1h4         | -4.834 | -4.342 | -4.981 | -4.981 | -4.981 | -4.981 | -4.981 | -4.980 | -4.981 | -4.981 | 20186  | NR1H4    | NM_001163504_10_-_1 |
| Atl3          | 1.341  | 2.123  | 1.369  | 0.366  | 1.667  | 2.408  | 1.611  | 1.751  | 1.146  | 0.970  | 109168 | ATL3     | NM_001163505_19_+_1 |
| Mmrn1         | -4.981 | -1.831 | -4.064 | -1.917 | -2.916 | -4.430 | -4.404 | -4.069 | -0.009 | -1.359 | 70945  | MMRN1    | NM_001163507_6_+_1  |
| Kcnn4         | 0.882  | -1.542 | 2.233  | -3.601 | 0.738  | -4.115 | 1.509  | -2.949 | 0.778  | -2.582 | 16534  | KCNN4    | NM_001163510_7_+_1  |
| Spata5        | 3.801  | 2.097  | 5.297  | 4.783  | 3.579  | 2.939  | 3.571  | 3.371  | 3.264  | 3.356  | 57815  | SPATA5   | NM_001163511_3_+_1  |
| Rgs12         | 1.457  | -0.302 | 4.645  | 5.234  | 7.446  | 7.602  | 6.134  | 4.911  | -0.803 | -2.163 | 71729  | RGS12    | NM_001163512_5_+_1  |
| Dlg5          | -4.981 | -4.981 | -4.500 | -3.463 | -4.979 | -4.970 | -4.973 | -4.852 | -4.981 | -4.981 | 71228  | DLG5     | NM_001163513_14_-_1 |
| Extl2         | 1.848  | 2.323  | 1.238  | 2.036  | 0.250  | 0.974  | 1.496  | 1.164  | 1.947  | 2.348  | 58193  | EXTL2    | NM_001163514_3_+_1  |
| Extl2         | -4.291 | -3.621 | -1.243 | -1.031 | -0.840 | -2.746 | -0.796 | -1.575 | -1.657 | 0.284  | 58193  | EXTL2    | NM_001163515_3_+_1  |
| Ccdc166       | 2.979  | 2.350  | 2.240  | 2.384  | 2.425  | 2.390  | 1.157  | 1.786  | 1.883  | 1.386  | 223648 | CCDC166  | NM_001163518_15_-_1 |
| Clhc1         | -3.293 | -3.011 | -3.414 | -4.183 | -2.639 | -3.622 | -3.655 | -3.891 | -1.743 | -4.981 | 73324  | CLHC1    | NM_001163521_11_+_1 |
| S100a14       | -4.981 | -4.854 | -4.960 | -4.960 | -4.964 | -4.964 | -4.978 | -4.979 | -4.967 | -4.976 | 66166  | S100A14  | NM_001163525_3_+_1  |
| S100a14       | -4.981 | -2.895 | -4.981 | -4.981 | -4.744 | -4.976 | -4.772 | -4.975 | -4.190 | -3.855 | 66166  | S100A14  | NM_001163526_3_+_1  |
| Itprlp1       | 3.429  | 3.263  | 5.618  | 5.476  | 3.358  | 3.087  | 3.810  | 3.880  | 3.443  | 3.484  | 73338  | ITPRIP1  | NM_001163527_2_-_1  |
| Itprlp1       | -4.017 | -0.520 | -1.271 | -1.958 | -4.474 | -2.130 | -3.008 | -1.671 | -3.696 | -3.178 | 73338  | ITPRIP1  | NM_001163528_2_-_1  |
| Adam33        | -3.116 | -4.981 | -4.967 | -2.163 | -3.741 | -3.619 | -1.853 | -2.587 | -1.005 | -1.204 | 110751 | ADAM33   | NM_001163529_2_-_1  |
| Tmem175       | 0.270  | -4.378 | 0.793  | 0.251  | -0.697 | -0.221 | -0.936 | -0.121 | -0.458 | -0.231 | 72392  | TMEM175  | NM_001163531_5_+_1  |

|               |        |        |        |        |        |        |        |        |        |        |           |           |                     |
|---------------|--------|--------|--------|--------|--------|--------|--------|--------|--------|--------|-----------|-----------|---------------------|
| Tmem175       | 5.246  | 5.196  | 4.263  | 4.209  | 4.353  | 4.502  | 4.512  | 4.452  | 4.282  | 4.559  | 72392     | TMEM175   | NM_001163532_5_+_1  |
| Rsph14        | -4.981 | -4.981 | -4.981 | -4.981 | -4.981 | -4.981 | -4.981 | -4.981 | -4.747 | -4.981 | 71236     | RSPH14    | NM_001163533_10_-_1 |
| Rsph14        | -4.981 | -4.981 | -4.981 | -4.981 | -4.981 | -4.981 | -4.981 | -4.981 | -4.599 | -4.981 | 71236     | RSPH14    | NM_001163534_10_-_1 |
| Rsph14        | -4.981 | -4.981 | -4.981 | -4.981 | -4.981 | -4.981 | -4.981 | -4.981 | -4.549 | -4.981 | 71236     | RSPH14    | NM_001163535_10_-_1 |
| Pgam5         | 4.759  | 4.520  | 4.282  | 4.584  | 4.464  | 4.342  | 4.204  | 4.166  | 4.527  | 4.158  | 72542     | PGAM5     | NM_001163538_5_-_1  |
| 5430427019Rik | 8.220  | 8.320  | 4.964  | 4.596  | 6.052  | 5.983  | 6.092  | 5.895  | 5.182  | 5.586  | 71398     | CXorf21   | NM_001163539_X+_1   |
| Plec          | -4.696 | -4.397 | -2.826 | -4.873 | -4.683 | -4.976 | -4.447 | -1.565 | -0.378 | 0.975  | 18810     | PLEC      | NM_001163540_15_-_1 |
| Plec          | -4.508 | -4.499 | -4.616 | -4.808 | -2.497 | -4.963 | -3.472 | -0.788 | -0.367 | -4.212 | 18810     | PLEC      | NM_001163542_15_-_1 |
| Cyth3         | -4.513 | -4.177 | -4.700 | -4.923 | -4.855 | -4.947 | -4.676 | -4.784 | -4.635 | -4.868 | 19159     | CYTH3     | NM_001163548_5+_1   |
| Plec          | -4.044 | -0.752 | -2.588 | -4.276 | -4.862 | -1.549 | -4.269 | -2.224 | -0.626 | -1.231 | 18810     | PLEC      | NM_001163549_15_-_1 |
| Ap4b1         | 2.533  | 3.024  | 1.392  | 1.203  | 1.864  | 1.300  | 1.596  | 0.728  | 2.370  | 2.547  | 67489     | AP4B1     | NM_001163552_3+_1   |
| Ap4b1         | -0.801 | -3.729 | -3.027 | -2.604 | -0.937 | -1.847 | -0.804 | -1.870 | -1.854 | -4.502 | 67489     | AP4B1     | NM_001163553_3+_1   |
| Pou2f2        | 0.632  | 0.495  | 0.119  | 0.406  | 2.597  | 2.124  | 3.759  | 3.663  | 5.331  | 4.490  | 18987     | POU2F2    | NM_001163554_7_-_1  |
| Pou2f2        | 0.919  | 1.385  | -0.388 | 0.434  | 3.328  | 2.519  | 3.902  | 3.661  | 4.643  | 4.552  | 18987     | POU2F2    | NM_001163555_7_-_1  |
| Pou2f2        | 1.326  | 1.491  | 1.331  | 1.638  | 2.786  | 3.359  | 4.112  | 4.026  | 4.667  | 4.814  | 18987     | POU2F2    | NM_001163556_7_-_1  |
| Ppfibp2       | -1.551 | -1.080 | 2.735  | 2.308  | 0.330  | -1.041 | 0.479  | 0.388  | 1.692  | 2.091  | 19024     | PPFIBP2   | NM_001163557_7+_1   |
| Naf1          | 1.759  | 2.081  | 1.703  | 0.667  | 1.279  | 0.793  | 1.368  | 0.703  | 0.268  | 0.400  | 234344    | NAF1      | NM_001163564_8+_1   |
| Ptpn5         | 0.644  | -0.788 | -4.981 | -4.981 | -4.991 | -3.763 | -4.114 | -3.412 | -4.981 | -4.981 | 19259     | PTPN5     | NM_001163565_7_-_1  |
| Crb2          | -4.981 | -4.981 | -4.981 | -4.981 | -4.885 | -4.950 | -4.981 | -4.981 | -4.036 | -4.081 | 241324    | CRB2      | NM_001163566_2+_1   |
| Fam102b       | 3.777  | 4.425  | 4.786  | 4.704  | 3.980  | 4.597  | 4.547  | 5.044  | 6.168  | 6.550  | 329739    | FAM102B   | NM_001163567_3_-_1  |
| Kif9          | 3.487  | 3.016  | 3.258  | 2.764  | 3.919  | 4.375  | 3.744  | 3.054  | 2.813  | 3.056  | 16578     | KIF9      | NM_001163569_9+_1   |
| Exosc8        | 0.512  | 1.641  | -0.238 | 0.644  | 1.020  | 0.113  | 1.702  | -0.987 | -1.009 | -1.073 | 69639     | EXOSC8    | NM_001163570_3_-_1  |
| Senp3         | 3.900  | 3.775  | 3.813  | 4.014  | 3.926  | 3.672  | 3.906  | 4.145  | 4.268  | 5.008  | 80886     | SENP3     | NM_001163571_11_-_1 |
| Tmem170b      | 4.601  | 4.811  | 5.037  | 4.701  | 5.685  | 5.582  | 5.742  | 5.301  | 5.825  | 5.954  | 621976    | TMEM170B  | NM_001163572_13+_1  |
| Scnm1         | 1.808  | -1.746 | 0.225  | -3.424 | -0.012 | -3.364 | -0.936 | -4.682 | -1.173 | -4.981 | 69269     | SCNM1     | NM_001163573_3_-_1  |
| Tjp1          | -4.981 | -1.868 | -4.622 | -1.641 | -3.522 | -3.732 | -2.564 | -2.437 | -4.981 | -4.981 | 21872     | TJP1      | NM_001163574_7_-_1  |
| Parp10        | 1.676  | 0.328  | 3.100  | 3.495  | 4.669  | 4.569  | 4.202  | 3.645  | 4.803  | 4.243  | 671535    | PARP10    | NM_001163575_15_-_1 |
| Parp10        | -0.816 | 0.443  | 1.502  | 1.140  | 2.022  | 1.897  | 2.343  | 1.961  | 3.503  | 2.870  | 671535    | PARP10    | NM_001163576_15_-_1 |
| Prom1         | -4.981 | -4.981 | -4.980 | -4.972 | -4.980 | -4.981 | -4.973 | -4.930 | -4.891 | -4.974 | 19126     | PROM1     | NM_001163577_5_-_1  |
| Prom1         | -4.981 | -4.981 | -4.979 | -4.869 | -4.976 | -4.981 | -4.917 | -3.828 | -4.874 | -4.975 | 19126     | PROM1     | NM_001163578_5_-_1  |
| Lrrcc1        | 2.684  | 3.737  | 2.249  | 2.109  | 1.980  | 1.962  | 3.001  | 2.524  | 1.015  | 1.671  | 71710     | LRRC1     | NM_001163579_3+_1   |
| Lrrcc1        | 2.100  | 1.932  | 2.438  | 2.011  | 0.636  | 1.042  | -0.404 | 1.095  | 0.320  | 1.491  | 71710     | LRRC1     | NM_001163580_3+_1   |
| Prom1         | -4.981 | -4.981 | -4.963 | -4.635 | -4.746 | -4.969 | -4.661 | -4.972 | -4.911 | -4.981 | 19126     | PROM1     | NM_001163581_5_-_1  |
| Prom1         | -4.981 | -4.981 | -4.980 | -4.447 | -4.919 | -4.977 | -4.821 | -4.597 | -4.768 | -4.981 | 19126     | PROM1     | NM_001163582_5_-_1  |
| Prom1         | -4.981 | -4.981 | -4.981 | -4.974 | -4.981 | -4.981 | -4.981 | -4.981 | -4.963 | -4.981 | 19126     | PROM1     | NM_001163583_5_-_1  |
| Prom1         | -4.981 | -4.981 | -4.943 | -3.863 | -3.715 | -3.084 | -2.301 | -0.934 | 1.503  | -1.962 | 19126     | PROM1     | NM_001163584_5_-_1  |
| Prom1         | -4.981 | -4.981 | -4.956 | -4.453 | -4.960 | -4.373 | -4.868 | -4.530 | -4.928 | -4.960 | 19126     | PROM1     | NM_001163585_5_-_1  |
| Prph          | -4.407 | -2.501 | -1.632 | -2.752 | -2.961 | -4.394 | -3.894 | -4.939 | -4.981 | -4.981 | 19132     | PRPH      | NM_001163588_15+_1  |
| Prph          | -0.639 | -1.393 | 1.649  | 2.720  | -1.191 | -2.108 | -0.634 | -2.483 | -4.981 | -4.981 | 19132     | PRPH      | NM_001163589_15+_1  |
| Stx11         | -3.765 | -3.437 | 2.519  | 3.435  | 1.465  | 2.480  | 2.216  | 3.947  | 4.205  | 5.367  | 74732     | STX11     | NM_001163590_10_-_1 |
| Stx11         | 1.133  | 2.157  | 3.624  | 3.284  | 2.405  | 2.416  | 3.652  | 3.876  | 4.641  | 4.672  | 74732     | STX11     | NM_001163591_10_-_1 |
| Nhsl1         | -3.668 | -2.437 | -1.561 | -0.689 | 1.725  | 1.603  | -1.606 | -2.418 | -4.981 | -3.855 | 215819    | NHSL1     | NM_001163592_10+_1  |
| Plxdc1        | 2.088  | 1.638  | -0.173 | -3.330 | -1.082 | 0.683  | 0.530  | -1.718 | 2.081  | 1.327  | 72324     | PLXDC1    | NM_001163608_11_-_1 |
| Psm8          | 0.995  | 2.453  | 1.616  | 2.802  | 1.009  | 1.692  | 0.922  | 2.098  | 0.487  | 1.460  | 73677     | PSMA8     | NM_001163609_18+_1  |
| Nhsl2         | 0.433  | -0.187 | 1.675  | 1.352  | 3.269  | 3.086  | 4.489  | 4.359  | 7.370  | 7.161  | 100042480 | NHSL2     | NM_001163610_X+_1   |
| 1810011H11Rik | 0.568  | -1.589 | -1.439 | -0.324 | 4.130  | 5.094  | 3.282  | 3.331  | 1.175  | 2.333  | 69069     | C10orf128 | NM_001163616_14+_1  |
| Tars2         | 0.312  | -1.575 | -2.933 | -1.160 | -1.913 | -3.112 | -2.221 | -2.752 | -4.630 | -1.860 | 71807     | TARS2     | NM_001163617_3_-_1  |
| Tars2         | 0.788  | 0.991  | -0.384 | -0.185 | 0.613  | 1.023  | 1.240  | 0.180  | 0.334  | -1.293 | 71807     | TARS2     | NM_001163618_3_-_1  |
| Tars2         | -2.638 | -1.660 | -3.465 | -2.713 | -1.824 | -2.158 | -1.335 | -1.972 | -2.054 | -2.311 | 71807     | TARS2     | NM_001163619_3_-_1  |
| Apol6         | -4.981 | -4.981 | -3.860 | -4.990 | -3.992 | -4.992 | -4.981 | -4.981 | -4.981 | -4.981 | 71939     | APOL6     | NM_001163621_15+_1  |
| Prepl         | 2.727  | 2.975  | 2.625  | 2.935  | 2.663  | 3.304  | 2.726  | 2.886  | 2.736  | 3.290  | 213760    | PREPL     | NM_001163622_17_-_1 |
| Prepl         | 0.651  | 0.317  | -1.526 | -0.133 | 0.814  | 1.067  | -0.191 | 0.599  | 0.704  | 1.303  | 213760    | PREPL     | NM_001163623_17_-_1 |
| Prepl         | -0.556 | -0.423 | -0.051 | -0.686 | 1.290  | 0.546  | -0.728 | -0.839 | -0.998 | -3.787 | 213760    | PREPL     | NM_001163624_17_-_1 |
| Sult6b1       | -0.286 | -1.961 | -2.930 | -2.821 | -1.943 | -3.950 | -1.187 | -3.791 | -0.360 | -3.797 | 73671     | SULT6B1   | NM_001163625_17_-_1 |
| Fam151b       | 3.263  | 3.280  | 1.930  | 1.048  | 1.867  | 1.878  | 2.491  | 2.098  | 3.316  | 3.065  | 73942     | FAM151B   | NM_001163627_13_-_1 |
| Lym5          | 1.743  | 2.816  | -0.017 | 1.646  | -0.298 | 1.240  | -0.416 | 1.454  | 1.077  | 1.164  | 67636     | ETFRF1    | NM_001163628_6+_1   |
| Satb1         | 3.383  | 2.406  | 2.863  | 2.521  | 4.319  | 4.302  | 3.421  | 3.232  | 2.983  | 2.475  | 20230     | SATB1     | NM_001163630_17_-_1 |
| Satb1         | 1.741  | 1.567  | 0.222  | -0.669 | 0.722  | 0.972  | 0.669  | 1.713  | -3.186 | -0.432 | 20230     | SATB1     | NM_001163631_17_-_1 |
| Satb1         | 3.510  | 3.311  | 2.880  | 1.443  | 3.168  | 3.085  | 3.271  | 1.776  | -2.485 | 0.675  | 20230     | SATB1     | NM_001163632_17_-_1 |
| Tnks2         | 5.568  | 5.863  | 6.676  | 6.584  | 6.663  | 6.643  | 6.466  | 6.431  | 6.917  | 7.191  | 74493     | TNKS2     | NM_001163635_19+_1  |
| Jakmp2        | -1.224 | 0.573  | -4.981 | -4.981 | -4.865 | -4.111 | -4.981 | -4.981 | -4.981 | -4.981 | 76217     | JAKMIP2   | NM_001163637_18_-_1 |
| Chn2          | 0.869  | -2.105 | 6.085  | 6.681  | 7.035  | 7.951  | 6.004  | 5.806  | 3.443  | 3.447  | 69993     | CHN2      | NM_001163640_6+_1   |
| Setdb1        | 1.815  | -0.294 | -0.255 | -0.689 | 0.909  | -0.227 | 0.509  | 1.534  | 0.656  | 0.233  | 84505     | SETDB1    | NM_001163641_3_-_1  |
| Setdb1        | 2.572  | 1.817  | 2.650  | 2.219  | 2.551  | 2.076  | 2.405  | 1.715  | 2.567  | 2.453  | 84505     | SETDB1    | NM_001163642_3_-_1  |
| Map3k12       | -3.675 | -3.156 | -0.589 | 0.327  | -1.367 | -1.890 | -3.122 | 0.217  | -1.131 | 0.256  | 26404     | MAP3K12   | NM_001163643_15_-_1 |
| Osblp3        | -1.891 | 1.470  | 4.673  | 4.345  | 3.091  | 2.140  | 3.804  | 1.464  | 3.460  | 1.889  | 71720     | OSBPL3    | NM_001163645_6_-_1  |
| Nkd1          | -4.981 | -2.754 | -4.829 | -4.577 | -1.565 | -2.681 | -4.974 | -4.014 | -4.394 | -3.948 | 93960     | NKD1      | NM_001163660_8+_1   |
| Telo2         | 2.274  | 2.374  | 3.035  | 3.201  | 2.526  | 2.535  | 1.595  | 2.755  | 2.565  | 2.874  | 71718     | TELO2     | NM_001163661_17_-_1 |
| Nucb1         | 7.439  | 7.471  | 7.145  | 7.370  | 6.260  | 6.658  | 6.901  | 7.625  | 7.995  | 8.027  | 18220     | NUCB1     | NM_001163662_7_-_1  |
| Rab6a         | 2.272  | 3.157  | 2.083  | 3.046  | 2.417  | 2.744  | 3.502  | 4.127  | 4.519  | 5.012  | 19346     | RAB6A     | NM_001163663_7+_1   |
| Tnnt3         | -4.666 | -3.813 | -4.422 | -4.898 | -4.905 | -4.879 | -2.717 | -4.909 | -4.576 | -4.887 | 21957     | TNNT3     | NM_001163664_7+_1   |
| Tnnt3         | -4.981 | -2.580 | -4.968 | -4.940 | -4.487 | -4.939 | -4.119 | -4.885 | -4.870 | -4.942 | 21957     | TNNT3     | NM_001163665_7+_1   |
| Tnnt3         | -4.512 | -1.794 | -2.491 | -4.780 | -4.876 | -3.196 | -1.778 | -3.279 | -4.246 | -4.785 | 21957     | TNNT3     | NM_001163666_7+_1   |
| Tnnt3         | -4.612 | -3.390 | -4.199 | -4.859 | -4.899 | -4.832 | -4.285 | -4.840 | -4.472 | -4.851 | 21957     | TNNT3     | NM_001163667_7+_1   |

|               |        |        |        |        |        |        |        |        |        |        |        |           |                     |
|---------------|--------|--------|--------|--------|--------|--------|--------|--------|--------|--------|--------|-----------|---------------------|
| Tnnt3         | -3.680 | -4.017 | -4.301 | -4.630 | -4.606 | -4.892 | -4.583 | -4.755 | -1.150 | -4.551 | 21957  | TNNT3     | NM_001163668_7_+_1  |
| Tnnt3         | -4.406 | -4.191 | -2.310 | -2.672 | -3.219 | -4.951 | -2.893 | -4.855 | -3.508 | -1.989 | 21957  | TNNT3     | NM_001163669_7_+_1  |
| Tnnt3         | 0.352  | -1.712 | -0.354 | -0.984 | -1.184 | -1.484 | -3.873 | -1.435 | -1.039 | -1.546 | 21957  | TNNT3     | NM_001163670_7_+_1  |
| Mapk9         | 1.993  | 1.471  | 2.815  | 2.770  | 2.108  | 1.914  | 1.928  | 1.000  | 2.355  | 2.791  | 26420  | MAPK9     | NM_001163671_11_+_1 |
| Mapk9         | 3.266  | 3.145  | 4.421  | 3.823  | 3.546  | 2.968  | 2.771  | 2.468  | 3.480  | 3.111  | 26420  | MAPK9     | NM_001163672_11_+_1 |
| Abcc4         | -3.061 | 0.594  | -0.135 | 0.188  | -2.541 | -4.279 | -1.663 | -1.019 | 0.862  | 0.459  | 239273 | ABCC4     | NM_001163675_14_-1  |
| Abcc4         | -3.118 | 0.557  | -1.799 | -1.508 | -4.492 | -2.433 | -0.737 | -4.690 | -0.979 | 0.813  | 239273 | ABCC4     | NM_001163676_14_-1  |
| Nosip         | 3.133  | 2.841  | 2.186  | 2.149  | 2.320  | 2.331  | 2.816  | 1.970  | 2.239  | 1.470  | 66394  | NOSIP     | NM_001163684_7_+_1  |
| Naaa          | -3.814 | -0.518 | 5.098  | 5.357  | -1.020 | -0.232 | 1.377  | 2.497  | 2.494  | 2.172  | 67111  | NAAA      | NM_001163687_5_-1   |
| Ptprra        | 6.904  | 6.761  | 7.033  | 6.777  | 6.416  | 6.297  | 6.590  | 6.812  | 7.108  | 7.303  | 19262  | PTPRA     | NM_001163688_2_+_1  |
| Pnpla2        | 5.691  | 5.665  | 6.469  | 6.295  | 5.730  | 5.757  | 5.996  | 5.854  | 6.618  | 6.170  | 66853  | PNPLA2    | NM_001163689_7_+_1  |
| Cacna1h       | -4.981 | -4.981 | -4.963 | -4.962 | -4.941 | -3.839 | -1.881 | -2.193 | -4.981 | -4.035 | 58226  | CACNA1H   | NM_001163691_17_-1  |
| 4932438H23Rik | -2.739 | -3.408 | 1.746  | 1.479  | -0.636 | -1.739 | -0.961 | -3.561 | -4.190 | -4.981 | 74387  | C21orf62  | NM_001163695_16_-1  |
| Nr1h4         | -3.371 | -0.338 | -4.981 | -4.981 | -4.981 | -4.980 | -4.978 | -4.973 | -4.981 | -4.981 | 20186  | NR1H4     | NM_001163700_10_-1  |
| Rpap1         | 3.368  | 3.464  | 3.560  | 3.840  | 3.759  | 4.039  | 3.823  | 3.222  | 3.746  | 3.785  | 68925  | RPAP1     | NM_001163701_2_-1   |
| Fbxo27        | -1.494 | -4.981 | -4.470 | -3.683 | -4.139 | -4.361 | -4.588 | -4.067 | -3.346 | -3.416 | 233040 | FBXO27    | NM_001163702_7_+_1  |
| Dcun1d3       | 1.125  | 1.935  | 3.392  | 2.983  | 2.202  | 1.668  | 2.076  | 2.266  | 3.114  | 2.731  | 233805 | DCUN1D3   | NM_001163703_7_-1   |
| Fbxo6         | 4.203  | 3.354  | 4.141  | 3.394  | 2.939  | 1.926  | 3.079  | 1.636  | 2.877  | 2.006  | 50762  | FBXO6     | NM_001163704_4_-1   |
| Fbxo6         | 5.724  | 6.597  | 5.488  | 6.350  | 4.690  | 5.409  | 4.768  | 5.411  | 4.154  | 4.806  | 50762  | FBXO6     | NM_001163705_4_-1   |
| Fbxo6         | 4.343  | 3.272  | 2.725  | 1.423  | 2.615  | 1.872  | 1.672  | 0.692  | 2.989  | 1.818  | 50762  | FBXO6     | NM_001163706_4_-1   |
| Fbxo6         | 3.876  | 2.689  | 2.761  | 1.833  | 1.282  | 1.249  | 0.940  | 1.029  | 2.160  | 2.375  | 50762  | FBXO6     | NM_001163707_4_-1   |
| Bri3          | 3.705  | 3.430  | 2.598  | 2.515  | 2.983  | 2.568  | 3.741  | 2.648  | 2.921  | 2.675  | 55950  | BR13      | NM_001163709_5_+_1  |
| Tufm          | 2.547  | 1.730  | 1.808  | 1.719  | 1.911  | 1.799  | 1.536  | 0.813  | 1.128  | 0.763  | 233870 | TUFM      | NM_001163713_7_+_1  |
| Tsr3          | -1.144 | 0.429  | -0.296 | 0.481  | -2.585 | -1.309 | -1.292 | -0.691 | -0.917 | -0.113 | 68327  | TSR3      | NM_001163718_17_+_1 |
| Smim1         | 0.104  | -0.630 | -4.674 | 1.569  | -2.802 | 1.568  | -1.704 | 1.780  | -1.940 | -1.263 | 68859  | SMIM1     | NM_001163721_4_-1   |
| Smim1         | -1.235 | -0.658 | -3.762 | -0.254 | -3.279 | -0.068 | -1.940 | -0.015 | -1.494 | -1.637 | 68859  | SMIM1     | NM_001163722_4_-1   |
| Dyx1c1        | -0.649 | -2.336 | -4.122 | -1.706 | -4.317 | -4.664 | -3.863 | -3.779 | -2.440 | -2.385 | 67685  | DYX1C1    | NM_001163725_9_+_1  |
| 4930563E22Rik | -4.981 | -1.293 | -1.628 | -1.936 | -0.024 | 0.196  | -0.504 | -1.600 | -2.175 | -2.120 | 75304  | C17orf100 | NM_001163728_11_+_1 |
| Klhdc3        | 0.141  | -0.798 | 1.417  | 1.319  | 1.485  | -0.410 | 1.103  | 0.689  | 2.198  | 1.316  | 71765  | KLHDC3    | NM_001163729_17_-1  |
| Rrp1b         | -0.962 | -1.959 | -1.410 | -0.281 | -0.217 | -0.218 | -1.438 | 0.168  | 0.698  | 0.186  | 72462  | RRP1B     | NM_001163734_17_+_1 |
| Ccdc167       | 2.262  | 2.068  | 2.752  | 2.241  | 2.306  | 1.857  | 1.948  | 2.273  | 3.397  | 3.468  | 68597  | CCDC167   | NM_001163741_17_-1  |
| Nlrx1         | 1.485  | 1.480  | 2.017  | 2.235  | 2.558  | 2.776  | 3.496  | 3.602  | 5.535  | 5.453  | 270151 | NLRX1     | NM_001163742_9_-1   |
| Nlrx1         | 1.081  | 1.307  | -0.752 | -0.165 | 0.489  | 0.409  | -0.465 | 0.633  | 3.595  | 2.603  | 270151 | NLRX1     | NM_001163743_9_-1   |
| Pgm3          | -4.782 | -1.824 | -2.858 | -3.416 | -4.818 | -4.937 | -3.563 | -3.079 | -2.005 | -2.319 | 109785 | PGM3      | NM_001163746_9_-1   |
| Tmem192       | 3.175  | 2.573  | 1.892  | 1.336  | 0.319  | -0.244 | 1.445  | 0.260  | 1.901  | 1.310  | 73067  | TMEM192   | NM_001163747_8_+_1  |
| Pde9a         | -4.981 | -4.981 | -4.517 | -4.197 | -4.985 | -3.041 | -4.417 | -4.288 | -4.981 | -4.981 | 18585  | PDE9A     | NM_001163748_17_+_1 |
| Camsap3       | 0.572  | 1.704  | -2.190 | -3.890 | -2.421 | -2.913 | -3.102 | -2.431 | -4.981 | -4.478 | 69697  | CAMSAP3   | NM_001163749_8_+_1  |
| Spsb3         | 3.100  | 2.334  | 3.733  | 2.906  | 3.330  | 1.397  | 3.189  | 1.619  | 3.935  | 2.557  | 79043  | SPSB3     | NM_001163750_17_+_1 |
| Spsb3         | 5.316  | 5.558  | 4.538  | 4.733  | 4.756  | 5.070  | 4.482  | 4.587  | 4.906  | 4.893  | 79043  | SPSB3     | NM_001163751_17_+_1 |
| 4930432K21Rik | 1.221  | 0.468  | -2.651 | -1.674 | -0.524 | -1.454 | -1.377 | -2.699 | -2.177 | -1.839 | 74666  | C19orf57  | NM_001163752_8_+_1  |
| Rab37         | -4.981 | -4.981 | -4.975 | -4.975 | -4.981 | -4.981 | -4.950 | -4.966 | -4.981 | -4.969 | 58222  | RAB37     | NM_001163753_11_+_1 |
| Rab3gap2      | 4.424  | 4.904  | 4.384  | 4.770  | 4.721  | 5.256  | 4.793  | 5.004  | 5.130  | 5.317  | 98732  | RAB3GAP2  | NM_001163754_1_+_1  |
| Dhx57         | 4.062  | 3.995  | 4.918  | 4.546  | 5.500  | 4.935  | 5.219  | 4.799  | 4.112  | 4.225  | 106794 | DHX57     | NM_001163759_17_-1  |
| 6430548M08Rik | -2.798 | -4.544 | -4.552 | -3.380 | -4.122 | -4.923 | -3.008 | -4.467 | -2.926 | -4.108 | 234797 | KIAA0513  | NM_001163760_8_+_1  |
| 6430548M08Rik | -1.000 | 0.834  | 1.908  | 1.890  | 3.691  | 3.337  | 5.532  | 5.609  | 7.648  | 7.239  | 234797 | KIAA0513  | NM_001163761_8_+_1  |
| 6430548M08Rik | -4.004 | -1.094 | -1.500 | -1.341 | -2.211 | -3.481 | -0.720 | -0.505 | 1.408  | 1.361  | 234797 | KIAA0513  | NM_001163762_8_+_1  |
| Tcf19         | 1.052  | 1.762  | 3.039  | 2.619  | 2.376  | 2.287  | 1.770  | 2.273  | 1.862  | 1.310  | 106795 | TCF19     | NM_001163763_17_-1  |
| Tcf19         | 3.005  | 2.722  | 4.165  | 4.407  | 3.149  | 2.526  | 2.462  | 2.386  | 2.600  | 1.271  | 106795 | TCF19     | NM_001163764_17_-1  |
| Wdr90         | 1.737  | 1.860  | 3.022  | 2.952  | 2.314  | 2.456  | 2.312  | 1.841  | 1.605  | 1.092  | 106618 | WDR90     | NM_001163766_17_-1  |
| U2af1         | 3.065  | 3.829  | 2.969  | 2.592  | 3.485  | 3.252  | 3.251  | 2.762  | 1.289  | 1.439  | 108121 | NA        | NM_001163769_17_-1  |
| Dxo           | 3.843  | 3.914  | 3.456  | 3.705  | 3.880  | 3.719  | 3.752  | 3.665  | 3.258  | 3.085  | 112403 | DXO       | NM_001163770_17_+_1 |
| Taok2         | 0.093  | 0.025  | 1.199  | 0.695  | 1.449  | 1.096  | 1.057  | 0.525  | 1.298  | 1.822  | 381921 | TAOK2     | NM_001163774_7_-1   |
| Taok2         | 3.843  | 4.006  | 4.281  | 4.293  | 4.829  | 4.815  | 4.590  | 4.547  | 5.276  | 5.265  | 381921 | TAOK2     | NM_001163775_7_-1   |
| Tmprss3       | -4.981 | -4.981 | -4.960 | -4.845 | -4.968 | -4.947 | -4.901 | -4.933 | -4.981 | -4.981 | 140765 | TMPRSS3   | NM_001163776_17_-1  |
| Ick           | 1.213  | 0.700  | 0.456  | -0.745 | -0.772 | 0.444  | 0.564  | -0.424 | 1.473  | -0.127 | 56542  | ICK       | NM_001163780_9_+_1  |
| Orc6          | 2.399  | -4.497 | 0.035  | -4.949 | 0.634  | -3.741 | 0.440  | -2.651 | -4.728 | -1.459 | 56452  | ORC6      | NM_001163791_8_+_1  |
| Fam76a        | 2.846  | 3.287  | 1.193  | 2.017  | 2.372  | 2.438  | 2.998  | 2.938  | 3.813  | 3.600  | 230789 | FAM76A    | NM_001163792_4_-1   |
| C530008M17Rik | -2.647 | -0.235 | -2.983 | -1.094 | -3.624 | -1.131 | -2.476 | -1.530 | -3.373 | -0.455 | 320827 | NA        | NM_001163793_5_+_1  |
| Pdik1l        | 3.835  | 3.549  | 4.053  | 4.165  | 3.874  | 3.833  | 4.041  | 3.831  | 4.234  | 4.445  | 230809 | PD1K1L    | NM_001163794_4_-1   |
| Trem14        | -4.738 | -4.385 | 4.425  | 4.320  | 2.346  | 1.664  | 3.755  | 4.150  | 3.277  | 4.556  | 224840 | NA        | NM_001163795_17_+_1 |
| Trem14        | -0.013 | -4.668 | 4.756  | 4.936  | 1.956  | 1.769  | 3.936  | 3.841  | 4.254  | 4.070  | 224840 | NA        | NM_001163796_17_+_1 |
| Zfp68         | 3.389  | 2.800  | 2.517  | 1.645  | 2.260  | 0.522  | 1.317  | 1.181  | 3.157  | 2.128  | 24135  | NA        | NM_001163797_5_-1   |
| Tescl         | -4.981 | 0.935  | -2.099 | 1.025  | -4.849 | 0.970  | -4.759 | 0.014  | -4.981 | -0.947 | 69301  | NA        | NM_001163810_7_-1   |
| Vav1          | 1.570  | -2.369 | 1.977  | -0.735 | 0.883  | 0.713  | 1.654  | 2.311  | 1.267  | 2.441  | 22324  | VAV1      | NM_001163815_17_+_1 |
| Vav1          | -4.619 | -4.369 | -0.014 | 0.659  | -1.391 | -4.839 | -1.392 | -1.710 | -4.163 | -0.841 | 22324  | VAV1      | NM_001163816_17_+_1 |
| Ppp1r10       | 3.747  | 4.593  | 4.771  | 4.882  | 4.932  | 4.953  | 4.473  | 4.475  | 4.697  | 4.905  | 52040  | PPP1R10   | NM_001163818_17_+_1 |
| Fance         | 3.283  | 2.845  | 2.329  | 1.913  | 2.982  | 1.933  | 2.344  | 1.962  | 2.875  | 2.761  | 72775  | FANCE     | NM_001163819_17_+_1 |
| Fance         | -0.322 | -0.138 | 0.266  | 0.131  | -1.117 | 0.553  | -1.051 | 0.263  | -1.138 | -0.930 | 72775  | FANCE     | NM_001163820_17_+_1 |
| Msl3l2        | 1.847  | 3.334  | 2.349  | 3.504  | 1.907  | 3.083  | 1.845  | 3.250  | 1.283  | 2.837  | 73390  | NA        | NM_001163833_10_+_1 |
| Tbc1d24       | -2.354 | -1.485 | -2.804 | -3.991 | -4.717 | -4.265 | -2.394 | -2.577 | -3.510 | -3.970 | 224617 | TBC1D24   | NM_001163847_17_-1  |
| Tbc1d24       | -3.326 | -2.343 | -3.521 | -1.732 | -3.967 | -3.136 | -2.951 | -1.837 | -3.538 | -4.167 | 224617 | TBC1D24   | NM_001163848_17_-1  |
| Tbc1d24       | -1.167 | -0.066 | -2.163 | -0.722 | -1.611 | -4.335 | 0.088  | -2.592 | -1.223 | -2.999 | 224617 | TBC1D24   | NM_001163849_17_-1  |
| Tbc1d24       | -1.878 | -0.931 | -0.598 | -0.586 | -2.907 | -3.819 | -0.983 | -2.637 | -0.171 | 2.652  | 224617 | TBC1D24   | NM_001163850_17_-1  |
| Tbc1d24       | -2.982 | -0.514 | -0.229 | 0.757  | -0.201 | -1.356 | -2.138 | -0.197 | 1.168  | 1.497  | 224617 | TBC1D24   | NM_001163851_17_-1  |

|           |        |        |        |        |        |        |        |        |        |        |           |          |                        |
|-----------|--------|--------|--------|--------|--------|--------|--------|--------|--------|--------|-----------|----------|------------------------|
| Tbc1d24   | -4.209 | -3.766 | -4.152 | -4.423 | -4.781 | -4.944 | -4.591 | -4.884 | -3.699 | -4.219 | 224617    | TBC1D24  | NM_001163852_17_-1     |
| Tbc1d24   | -3.262 | -2.532 | -1.354 | -0.402 | -2.567 | -2.484 | -3.257 | -1.940 | 0.393  | -0.645 | 224617    | TBC1D24  | NM_001163853_17_-1     |
| BC051142  | -0.507 | -1.426 | -0.891 | -1.264 | -0.917 | 0.056  | -2.689 | -3.459 | -4.981 | -4.981 | 407788    | NA       | NM_001163855_17_+1     |
| Zfp960    | -1.844 | -0.660 | -0.533 | -3.261 | -1.532 | -2.146 | -1.012 | -2.352 | -4.757 | -3.300 | 449000    | NA       | NM_001163919_17_+1     |
| Rpl3l     | 5.277  | 7.077  | -4.983 | -2.208 | -4.818 | -3.784 | -4.764 | -0.711 | -4.981 | -4.981 | 66211     | RPL3L    | NM_001163945_17_+1     |
| Zfp605    | 1.354  | 2.291  | 1.923  | 1.595  | 1.911  | 1.745  | 2.178  | 1.528  | 1.656  | 1.905  | 675812    | ZNF605   | NM_001163996_5_+1      |
| Ly6e      | 5.016  | 2.544  | 5.963  | 3.707  | 3.504  | -1.710 | 4.235  | 1.940  | 5.283  | 3.798  | 17069     | LY6E     | NM_001164036_15_+1     |
| Ly6e      | 2.731  | -0.205 | 2.857  | -0.353 | 0.548  | -4.530 | 0.882  | -2.512 | 1.925  | 0.176  | 17069     | LY6E     | NM_001164037_15_+1     |
| Ly6e      | 11.847 | 10.593 | 10.723 | 10.049 | 9.395  | 5.971  | 9.670  | 9.013  | 10.735 | 9.987  | 17069     | LY6E     | NM_001164038_15_+1     |
| Ly6e      | 10.915 | 9.685  | 9.649  | 8.770  | 8.543  | 4.688  | 8.808  | 7.689  | 9.546  | 8.691  | 17069     | LY6E     | NM_001164039_15_+1     |
| Ly6e      | 10.624 | 8.111  | 9.741  | 8.184  | 8.160  | 4.289  | 8.513  | 7.250  | 9.102  | 7.911  | 17069     | LY6E     | NM_001164040_15_+1     |
| Smad5     | -4.203 | -3.876 | -1.774 | -3.025 | -2.019 | -2.542 | -4.505 | -4.886 | -4.375 | -4.724 | 17129     | SMAD5    | NM_001164041_13_+1     |
| Smad5     | -0.649 | -0.588 | -0.775 | 0.745  | -2.384 | -3.106 | -0.240 | -0.604 | 0.914  | -0.820 | 17129     | SMAD5    | NM_001164042_13_+1     |
| Ccl27a    | -0.435 | 0.621  | -3.891 | -3.833 | -3.419 | -4.199 | -3.904 | -2.937 | -2.719 | -3.376 | 20301     | NA       | NM_001164044_4_-1      |
| Ccl27a    | 1.500  | 0.987  | 0.083  | 0.575  | -0.152 | 1.308  | 0.125  | 0.341  | -0.855 | 0.145  | 20301     | NA       | NM_001164045_4_-1      |
| Gm13306   | -4.981 | -4.981 | -4.960 | -4.591 | -4.977 | -4.962 | -4.974 | -4.834 | -4.981 | -4.981 | 100039863 | CCL27    | NM_001164046_4_+1      |
| Gm13306   | -4.981 | -4.981 | -4.960 | -4.591 | -4.977 | -4.962 | -4.979 | -4.976 | -4.981 | -4.981 | 100039863 | CCL27    | NM_001164046_dup1_4_+2 |
| Pik3cd    | 1.685  | 1.153  | 1.604  | 0.809  | 0.193  | 0.289  | 0.549  | 1.816  | 2.539  | 3.672  | 18707     | PIK3CD   | NM_001164049_4_-1      |
| Pik3cd    | 4.235  | 4.580  | 4.181  | 4.379  | 4.931  | 5.056  | 5.225  | 4.759  | 6.221  | 6.087  | 18707     | PIK3CD   | NM_001164050_4_-1      |
| Pik3cd    | 1.270  | -3.103 | -3.008 | -2.777 | -1.473 | -4.859 | 0.192  | -2.854 | -0.196 | -4.248 | 18707     | PIK3CD   | NM_001164051_4_-1      |
| Pik3cd    | 2.481  | 4.079  | 2.467  | 3.069  | 3.569  | 4.426  | 4.458  | 4.116  | 5.991  | 6.135  | 18707     | PIK3CD   | NM_001164052_4_-1      |
| Pkig      | 6.792  | 7.147  | 0.858  | 2.021  | 1.963  | 2.619  | 2.634  | 3.736  | 2.815  | 2.411  | 18769     | PKIG     | NM_001164053_2_+1      |
| Pkig      | 3.292  | 3.472  | 0.663  | 0.874  | 1.123  | 0.033  | 0.988  | 2.086  | 1.918  | 1.395  | 18769     | PKIG     | NM_001164055_2_+1      |
| Pld1      | -1.982 | 2.644  | -2.315 | -1.805 | -2.514 | -1.965 | 0.075  | 1.830  | 3.743  | 4.103  | 18805     | PLD1     | NM_001164056_3_+1      |
| Pola2     | 2.914  | 2.907  | 4.245  | 4.072  | 3.970  | 3.580  | 3.716  | 3.797  | 2.981  | 2.553  | 18969     | POLA2    | NM_001164057_19_-1     |
| Sell      | 5.921  | 0.882  | 2.221  | -4.839 | -4.782 | -4.826 | -0.933 | -2.700 | 4.313  | -0.141 | 20343     | SELL     | NM_001164059_1_+1      |
| Stat5a    | 3.004  | 3.309  | 4.316  | 4.056  | 4.324  | 3.883  | 4.022  | 3.804  | 4.367  | 4.277  | 20850     | STAT5A   | NM_001164062_11_+1     |
| Tank      | 0.414  | 1.123  | 2.043  | 1.185  | 1.637  | 1.316  | 1.987  | 1.888  | 3.191  | 2.288  | 21353     | TANK     | NM_001164071_2_+1      |
| Tank      | 4.908  | 4.914  | 5.591  | 5.895  | 6.249  | 6.142  | 5.913  | 5.651  | 5.419  | 5.554  | 21353     | TANK     | NM_001164072_2_+1      |
| Tgif1     | 1.093  | -0.725 | 3.041  | 2.840  | 2.166  | 2.082  | 2.325  | 1.840  | 1.413  | 2.134  | 21815     | TGIF1    | NM_001164074_17_-1     |
| Tgif1     | 0.788  | 0.001  | 1.372  | 1.492  | 2.085  | 2.589  | 2.664  | 2.493  | 1.443  | 2.122  | 21815     | TGIF1    | NM_001164075_17_-1     |
| Tgif1     | -1.142 | 0.373  | 2.148  | 1.324  | 1.595  | 1.642  | 2.286  | 1.670  | 2.255  | 2.085  | 21815     | TGIF1    | NM_001164076_17_-1     |
| Tgif1     | 0.018  | -2.393 | 1.940  | 1.916  | 2.294  | 1.996  | 2.329  | 2.414  | 2.631  | 3.211  | 21815     | TGIF1    | NM_001164077_17_-1     |
| Tia1      | 2.251  | 0.245  | 2.257  | 1.000  | 2.702  | 2.458  | 2.136  | 0.205  | 0.615  | 0.041  | 21841     | TIA1     | NM_001164078_6_+1      |
| Tia1      | -0.387 | -0.178 | -0.773 | -0.040 | -0.014 | -2.210 | -0.209 | -3.320 | -0.425 | -4.872 | 21841     | TIA1     | NM_001164079_6_+1      |
| Timeless  | -0.056 | -0.234 | 1.276  | 1.388  | 3.458  | 2.706  | 2.686  | 1.196  | 1.787  | 0.941  | 21853     | TIMELESS | NM_001164080_10_+1     |
| Timeless  | 1.248  | 1.610  | 2.904  | 2.521  | 3.595  | 2.930  | 2.314  | 2.319  | 1.124  | 0.843  | 21853     | TIMELESS | NM_001164081_10_+1     |
| Polr3d    | 2.379  | 2.411  | 0.904  | 1.820  | 1.655  | 1.898  | 1.914  | 1.873  | 1.197  | -0.421 | 67065     | POLR3D   | NM_001164082_14_-1     |
| Homer2    | -4.981 | -4.981 | 3.182  | 2.419  | -4.767 | -4.859 | -3.523 | -2.062 | -4.981 | -4.981 | 26557     | HOMER2   | NM_001164086_7_-1      |
| Homer2    | -4.981 | -4.981 | -3.864 | -3.583 | -4.787 | -4.928 | -3.722 | -4.440 | -4.981 | -4.981 | 26557     | HOMER2   | NM_001164087_7_-1      |
| Cops7a    | 3.688  | 3.604  | 4.050  | 4.358  | 3.521  | 3.844  | 3.205  | 3.387  | 2.657  | 2.722  | 26894     | COPS7A   | NM_001164089_6_-1      |
| Bcap29    | 6.815  | 6.492  | 6.685  | 6.767  | 5.794  | 5.915  | 6.196  | 6.007  | 5.227  | 5.170  | 12033     | BCAP29   | NM_001164090_12_-1     |
| Polr3e    | -3.827 | 0.825  | -1.738 | -2.198 | -2.176 | -4.940 | -1.110 | -3.452 | -1.748 | -4.520 | 26939     | POLR3E   | NM_001164096_7_+1      |
| Add3      | 0.361  | -2.131 | 0.263  | -4.124 | -1.882 | -4.256 | 3.116  | 3.031  | 7.220  | 5.446  | 27360     | ADD3     | NM_001164099_19_+1     |
| Add3      | -1.009 | 3.077  | 3.585  | 5.738  | 4.428  | 5.448  | 3.882  | 4.415  | 4.054  | 4.372  | 27360     | ADD3     | NM_001164100_19_+1     |
| Add3      | 1.104  | 3.647  | 1.486  | 5.857  | 1.876  | 4.065  | 4.721  | 6.381  | 8.211  | 8.864  | 27360     | ADD3     | NM_001164101_19_+1     |
| Ripk3     | -4.109 | -3.897 | -1.215 | 0.348  | -4.505 | -4.707 | -2.521 | -0.725 | -1.418 | -0.123 | 56532     | RIPK3    | NM_001164107_14_-1     |
| Ripk3     | 1.028  | 1.509  | 1.883  | 2.462  | 0.845  | 0.920  | 1.920  | 1.994  | 1.787  | 0.441  | 56532     | RIPK3    | NM_001164108_14_-1     |
| Nfatc1    | -1.938 | -1.223 | -0.657 | -0.277 | -0.412 | 0.809  | -1.188 | 0.998  | -1.625 | -1.309 | 18018     | NFATC1   | NM_001164109_18_-1     |
| Nfatc1    | -3.047 | -2.134 | -2.275 | -2.180 | -1.943 | -0.665 | -2.440 | 0.256  | -1.736 | -1.288 | 18018     | NFATC1   | NM_001164110_18_-1     |
| Nfatc1    | 4.713  | 4.929  | 4.617  | 4.344  | 5.207  | 5.284  | 5.236  | 4.824  | 5.950  | 5.398  | 18018     | NFATC1   | NM_001164111_18_-1     |
| Nfatc1    | 3.426  | 3.214  | 2.772  | 3.290  | 3.861  | 3.677  | 3.729  | 4.169  | 5.571  | 5.469  | 18018     | NFATC1   | NM_001164112_18_-1     |
| Serpinb6a | -2.243 | -4.614 | -4.804 | -2.661 | -3.698 | -4.455 | -0.674 | -4.831 | -4.853 | -1.719 | 20719     | SERPINB6 | NM_001164117_13_-1     |
| Serpinb6a | -0.597 | -2.038 | -0.795 | -1.892 | -0.541 | -1.626 | -0.704 | -0.031 | -1.447 | -3.077 | 20719     | SERPINB6 | NM_001164118_13_-1     |
| Tcf3      | 0.329  | -0.978 | 1.119  | 1.533  | 0.843  | 0.752  | 1.291  | 0.131  | 0.598  | 1.743  | 21423     | TCF3     | NM_001164147_10_-1     |
| Tcf3      | 0.680  | -0.300 | 0.601  | 0.546  | 0.536  | 1.032  | 0.868  | 0.785  | 0.544  | 0.941  | 21423     | TCF3     | NM_001164148_10_-1     |
| Tcf3      | 1.773  | 1.848  | 2.076  | 1.485  | 2.165  | 1.623  | 2.306  | 2.510  | 2.809  | 2.451  | 21423     | TCF3     | NM_001164149_10_-1     |
| Tcf3      | 0.969  | 0.420  | 1.424  | 1.803  | 1.502  | 2.034  | 1.850  | 1.525  | 1.315  | 1.956  | 21423     | TCF3     | NM_001164150_10_-1     |
| Tcf3      | 1.943  | 2.569  | 3.024  | 2.853  | 2.807  | 2.582  | 3.046  | 2.744  | 3.536  | 3.402  | 21423     | TCF3     | NM_001164151_10_-1     |
| Tcf3      | 1.822  | 0.843  | 1.251  | 1.542  | 1.504  | 1.956  | 1.255  | 1.292  | 0.786  | 0.890  | 21423     | TCF3     | NM_001164152_10_-1     |
| Tcf3      | -0.844 | 0.832  | -0.071 | -3.444 | -1.322 | 0.313  | -0.522 | -0.087 | 0.611  | -0.483 | 21423     | TCF3     | NM_001164153_10_-1     |
| Tnfrsf19  | -4.981 | -4.981 | -4.970 | -4.970 | -4.925 | -4.453 | -4.895 | -4.875 | -4.981 | -4.981 | 29820     | TNFRSF19 | NM_001164155_14_-1     |
| Mcrs1     | 2.852  | 1.777  | 2.805  | 2.717  | 3.179  | 2.742  | 3.261  | 2.921  | 4.123  | 3.265  | 51812     | MCRS1    | NM_001164156_15_-1     |
| Ppp6r3    | 3.085  | 4.021  | 2.039  | 2.199  | 2.880  | 2.709  | 2.898  | 2.721  | 3.484  | 2.437  | 52036     | PPP6R3   | NM_001164159_19_-1     |
| Pias2     | 0.508  | -0.816 | -0.104 | -0.590 | -1.355 | -1.539 | -0.151 | -1.130 | -0.453 | -0.015 | 17344     | PIAS2    | NM_001164167_18_+1     |
| Pias2     | 1.454  | 1.874  | 1.132  | 1.623  | 2.061  | 1.717  | 1.901  | 1.995  | 2.161  | 2.317  | 17344     | PIAS2    | NM_001164168_18_+1     |
| Pias2     | 3.552  | 3.665  | 3.211  | 2.978  | 3.354  | 3.265  | 3.065  | 3.410  | 3.282  | 3.124  | 17344     | PIAS2    | NM_001164169_18_+1     |
| Pias2     | -0.226 | -0.201 | -0.510 | 0.564  | 0.905  | 1.031  | 0.911  | 1.037  | 1.124  | -0.052 | 17344     | PIAS2    | NM_001164170_18_+1     |
| Map2k7    | 0.670  | 2.633  | 3.192  | 2.254  | 3.358  | 2.746  | 3.780  | 2.769  | 4.625  | 3.379  | 26400     | MAP2K7   | NM_001164172_8_+1      |
| Cpsf1     | -1.455 | -4.981 | -0.428 | -4.745 | 0.050  | -3.151 | -1.350 | -4.884 | 0.416  | -4.040 | 94230     | CPSF1    | NM_001164173_15_-1     |
| Psmid10   | 3.776  | 4.143  | 2.332  | 2.200  | 2.447  | 2.147  | 2.435  | 1.499  | 1.994  | 0.745  | 53380     | PSMD10   | NM_001164177_X_-1      |
| Lsr       | -0.866 | -4.094 | 5.738  | 5.803  | 2.185  | 1.000  | 3.465  | 3.078  | 4.600  | 3.422  | 54135     | LSR      | NM_001164184_7_-1      |
| Lsr       | -3.843 | -0.338 | 5.818  | 5.840  | 1.257  | 0.370  | 2.427  | 2.976  | 3.980  | 2.708  | 54135     | LSR      | NM_001164185_7_-1      |
| Barhl1    | -4.981 | -4.981 | -4.184 | -4.924 | -4.829 | -4.977 | -4.981 | -4.981 | -4.981 | -4.981 | 54422     | BARHL1   | NM_001164186_2_-1      |

|               |        |        |        |        |        |        |        |        |        |        |        |          |                     |
|---------------|--------|--------|--------|--------|--------|--------|--------|--------|--------|--------|--------|----------|---------------------|
| Nagk          | 4.669  | 4.693  | 5.490  | 5.354  | 3.626  | 3.819  | 3.970  | 3.892  | 3.329  | 3.497  | 56174  | NAGK     | NM_001164187_6_+_1  |
| Mtm1          | -3.651 | -3.182 | -4.081 | -4.520 | -4.570 | -4.921 | -4.321 | -4.695 | -3.781 | -4.172 | 17772  | MTM1     | NM_001164190_X_+_1  |
| Mtm1          | 3.748  | 4.134  | 4.070  | 4.270  | 2.615  | 2.997  | 2.754  | 3.087  | 4.317  | 4.743  | 17772  | MTM1     | NM_001164191_X_+_1  |
| Mtm1          | -3.741 | -3.026 | -0.515 | -4.699 | -0.514 | -3.482 | -1.475 | -4.080 | -4.433 | -4.519 | 17772  | MTM1     | NM_001164192_X_+_1  |
| Mtm1          | -1.439 | -4.981 | -4.192 | -4.970 | -4.367 | -3.475 | -3.330 | -4.783 | -4.981 | -4.981 | 17772  | MTM1     | NM_001164193_X_+_1  |
| Pex3          | 2.075  | 1.013  | 1.634  | 1.743  | 0.472  | 0.296  | -0.286 | -0.483 | -2.082 | -4.877 | 56535  | PEX3     | NM_001164195_10_-_1 |
| Mmp19         | -4.981 | -4.981 | 1.955  | 1.753  | -1.799 | -3.257 | -2.239 | 0.244  | 1.753  | 3.366  | 58223  | MMP19    | NM_001164197_10_+_1 |
| Prkacb        | -3.920 | -3.125 | -1.240 | -0.967 | -1.506 | -2.375 | -1.326 | -1.200 | 0.459  | 0.377  | 18749  | PRKACB   | NM_001164198_3_-_1  |
| Prkacb        | -1.766 | 0.241  | 0.289  | -1.032 | -0.270 | -1.973 | -0.834 | -0.787 | -0.934 | -3.203 | 18749  | PRKACB   | NM_001164199_3_-_1  |
| Prkacb        | 5.843  | 5.801  | 5.769  | 5.757  | 6.385  | 6.494  | 6.153  | 5.849  | 5.899  | 6.149  | 18749  | PRKACB   | NM_001164200_3_-_1  |
| Gm8369        | -2.092 | -3.315 | -1.927 | -1.634 | -1.039 | -1.111 | 0.898  | 0.755  | 0.501  | -0.094 | 666926 | NA       | NM_001164202_19_+_1 |
| Plec          | -4.673 | -4.558 | -4.829 | -4.885 | -4.898 | -4.955 | -4.765 | -4.571 | -3.137 | -4.653 | 18810  | PLEC     | NM_001164203_15_-_1 |
| Tsen34        | 2.625  | 3.658  | 1.796  | 2.162  | 2.741  | 2.975  | 2.214  | 2.264  | 1.688  | 2.320  | 66078  | TSEN34   | NM_001164204_7_+_1  |
| Tsen34        | -4.981 | -0.820 | -2.602 | -3.498 | -1.574 | -1.638 | -2.260 | -3.999 | -1.450 | -0.542 | 66078  | TSEN34   | NM_001164205_7_+_1  |
| Tmem176b      | 3.226  | 3.240  | 3.329  | 3.710  | 5.098  | 5.078  | 5.910  | 5.831  | 2.959  | 3.438  | 65963  | TMEM176B | NM_001164207_6_-_1  |
| Tmem176b      | 5.282  | 5.659  | 7.227  | 7.440  | 9.403  | 9.532  | 10.015 | 10.108 | 7.815  | 8.665  | 65963  | TMEM176B | NM_001164208_6_-_1  |
| Tmem176b      | 3.240  | 2.910  | 4.781  | 5.182  | 6.666  | 7.007  | 7.566  | 7.653  | 4.547  | 5.293  | 65963  | TMEM176B | NM_001164209_6_-_1  |
| Rerg          | -4.981 | -4.981 | -4.980 | -4.980 | -4.977 | -3.767 | -4.981 | -4.981 | -4.437 | -4.981 | 232441 | RERG     | NM_001164212_6_-_1  |
| Rerg          | -4.981 | -4.981 | -4.978 | -4.978 | -4.975 | -4.975 | -4.981 | -4.981 | -3.834 | -4.981 | 232441 | RERG     | NM_001164214_6_-_1  |
| Romo1         | 6.565  | 6.277  | 6.147  | 6.087  | 6.131  | 5.930  | 6.285  | 5.802  | 4.992  | 4.703  | 67067  | ROMO1    | NM_001164216_2_+_1  |
| Romo1         | 2.029  | 1.740  | 1.773  | 1.969  | 1.551  | 1.407  | 2.008  | 1.067  | 0.886  | 0.893  | 67067  | ROMO1    | NM_001164217_2_+_1  |
| Trim13        | -4.026 | -3.549 | -4.141 | -4.571 | -4.649 | -4.867 | -2.940 | -4.672 | -4.166 | -4.318 | 66597  | TRIM13   | NM_001164220_14_+_1 |
| Col4a3bp      | 3.181  | 3.713  | 4.322  | 4.347  | 3.959  | 4.166  | 3.835  | 3.966  | 4.017  | 4.320  | 68018  | COL4A3BP | NM_001164222_13_+_1 |
| Rpa1          | 0.514  | -0.421 | 0.241  | -3.338 | 1.976  | -0.938 | 0.959  | -2.356 | 1.934  | -1.765 | 68275  | RPA1     | NM_001164223_11_-_1 |
| Aspscr1       | 1.626  | 1.911  | 1.390  | 1.615  | 1.520  | 0.767  | 1.790  | 1.020  | 2.884  | 1.856  | 68938  | ASPSCR1  | NM_001164224_11_+_1 |
| Fbxl16        | -3.563 | -4.981 | -4.331 | -4.678 | -2.431 | -3.456 | -4.968 | -3.828 | -4.981 | -4.981 | 214931 | FBXL16   | NM_001164225_17_+_1 |
| Nrf1          | 2.683  | 3.390  | 2.704  | 2.429  | 3.601  | 2.426  | 3.333  | 3.496  | 4.262  | 4.100  | 18181  | NRF1     | NM_001164226_6_+_1  |
| Nrf1          | 2.652  | 2.301  | 2.482  | 2.062  | 2.451  | 2.051  | 2.511  | 2.086  | 2.883  | 2.044  | 18181  | NRF1     | NM_001164227_6_+_1  |
| Nrf1          | -4.895 | -4.981 | -4.900 | -4.960 | -4.965 | -4.973 | -4.980 | -4.980 | -4.846 | -4.966 | 18181  | NRF1     | NM_001164228_6_+_1  |
| Nrf1          | -1.160 | 0.159  | 0.155  | -0.055 | 0.242  | -0.587 | -0.384 | -0.148 | 0.311  | 1.042  | 18181  | NRF1     | NM_001164229_6_+_1  |
| Nrf1          | -0.759 | -4.981 | -4.887 | -4.977 | -4.075 | -4.964 | -2.936 | -4.942 | -3.462 | -4.981 | 18181  | NRF1     | NM_001164230_6_+_1  |
| Pwwp2a        | 3.761  | 3.991  | 3.705  | 3.378  | 3.749  | 3.998  | 3.698  | 3.707  | 3.689  | 3.686  | 70802  | PWWP2A   | NM_001164231_11_+_1 |
| 1700034J05Rik | -4.981 | -1.298 | -3.956 | -4.920 | -4.959 | -4.942 | -4.857 | -4.963 | -4.981 | -4.981 | 73344  | C12orf71 | NM_001164236_6_-_1  |
| Rnf41         | 4.037  | 4.116  | 4.999  | 5.052  | 5.331  | 5.431  | 5.179  | 5.182  | 5.433  | 5.397  | 67588  | RNF41    | NM_001164237_10_+_1 |
| Prpsap2       | 4.355  | 4.907  | 3.708  | 4.219  | 3.937  | 4.443  | 3.901  | 3.431  | 2.813  | 2.892  | 212627 | PRPSAP2  | NM_001164242_11_-_1 |
| Prpsap2       | 3.042  | 2.922  | 2.061  | 1.852  | 0.934  | 1.402  | 1.586  | 0.375  | 1.853  | 1.306  | 212627 | PRPSAP2  | NM_001164243_11_-_1 |
| Prpsap2       | 3.560  | 3.405  | 3.219  | 2.043  | 3.301  | 2.625  | 2.541  | 2.828  | 2.194  | 2.312  | 212627 | PRPSAP2  | NM_001164244_11_-_1 |
| Tpm1          | -4.981 | -4.588 | -4.693 | -4.626 | -4.981 | -4.981 | -4.971 | -4.966 | -4.981 | -4.981 | 22003  | NA       | NM_001164248_9_-_1  |
| Tpm1          | -4.861 | -3.571 | -3.127 | -2.480 | -4.470 | -4.961 | -4.964 | -3.266 | -2.538 | -2.352 | 22003  | NA       | NM_001164249_9_-_1  |
| Tpm1          | -3.465 | -2.001 | -1.150 | -2.582 | -4.979 | -4.757 | -2.473 | -2.744 | -2.131 | -3.135 | 22003  | NA       | NM_001164250_9_-_1  |
| Tpm1          | -4.981 | -4.063 | -4.105 | -4.331 | -4.908 | -3.879 | -4.967 | -4.963 | -4.981 | -4.981 | 22003  | NA       | NM_001164251_9_-_1  |
| Tpm1          | 3.273  | 3.391  | 3.654  | 3.410  | 3.801  | 4.081  | 3.918  | 3.292  | 2.204  | 2.969  | 22003  | NA       | NM_001164252_9_-_1  |
| Tpm1          | 5.142  | 5.104  | 5.234  | 5.281  | 4.897  | 4.946  | 4.875  | 4.856  | 3.655  | 3.335  | 22003  | NA       | NM_001164253_9_-_1  |
| Tpm1          | -2.688 | -1.912 | -2.294 | -2.827 | -1.234 | -3.447 | -4.610 | -3.937 | -3.124 | -3.976 | 22003  | NA       | NM_001164254_9_-_1  |
| Tpm1          | -4.668 | -4.981 | -4.417 | -4.679 | -4.979 | -4.975 | -4.824 | -4.892 | -4.602 | -4.763 | 22003  | NA       | NM_001164255_9_-_1  |
| Tpm1          | -1.669 | -4.981 | -0.506 | -0.904 | 0.031  | -0.161 | -1.531 | -1.145 | -1.105 | -0.815 | 22003  | NA       | NM_001164256_9_-_1  |
| Xrra1         | -4.981 | -4.981 | -3.736 | -4.981 | -4.965 | -4.465 | -4.981 | -4.981 | -4.394 | -4.981 | 446101 | XRR1     | NM_001164258_7_+_1  |
| Fgfrl1        | -0.345 | -0.505 | -2.431 | -2.760 | -4.052 | -1.977 | -1.389 | -2.557 | -1.846 | -2.919 | 116701 | FGFR1    | NM_001164259_5_+_1  |
| Plekhs1       | -4.981 | -4.981 | -4.952 | -4.552 | -1.623 | 1.453  | -2.281 | -1.445 | -4.981 | -4.342 | 226245 | PLEKH51  | NM_001164263_19_+_1 |
| Cpsf7         | 4.259  | 4.217  | 3.414  | 3.179  | 4.128  | 3.783  | 3.890  | 2.507  | 3.954  | 3.628  | 269061 | CPF57    | NM_001164272_19_+_1 |
| Mga           | 4.687  | 4.041  | 3.351  | 2.471  | 3.402  | 2.575  | 3.113  | 2.037  | 1.808  | -1.060 | 29808  | MGA      | NM_001164274_2_+_1  |
| Prrg1         | -3.282 | -4.981 | -2.908 | -3.830 | -1.229 | -2.306 | -2.468 | -3.545 | -4.814 | 0.611  | 546336 | PRRG1    | NM_001164275_X_-_1  |
| Phf11c        | 1.748  | 1.692  | 4.846  | 4.465  | 5.564  | 4.436  | 3.997  | 2.828  | 1.865  | 1.325  | 628705 | PHF11    | NM_001164289_14_-_1 |
| Cuedc2        | 4.672  | 4.278  | 3.802  | 4.086  | 4.352  | 4.227  | 3.495  | 3.283  | 4.330  | 3.959  | 67116  | CUEDC2   | NM_001164290_19_-_1 |
| Cuedc2        | 6.016  | 5.285  | 4.286  | 4.514  | 4.626  | 4.990  | 4.391  | 4.190  | 4.142  | 3.669  | 67116  | CUEDC2   | NM_001164291_19_-_1 |
| Cuedc2        | 4.370  | 4.951  | 3.395  | 3.124  | 4.339  | 3.586  | 3.829  | 3.444  | 3.274  | 3.335  | 67116  | CUEDC2   | NM_001164292_19_-_1 |
| Cuedc2        | 3.685  | 3.302  | 2.432  | 2.490  | 2.567  | 2.608  | 2.715  | 2.466  | 2.933  | 2.576  | 67116  | CUEDC2   | NM_001164293_19_-_1 |
| Cuedc2        | 4.317  | 3.953  | 2.904  | 3.624  | 3.353  | 4.091  | 3.289  | 3.317  | 2.976  | 2.576  | 67116  | CUEDC2   | NM_001164294_19_-_1 |
| Cuedc2        | 3.064  | 3.586  | 2.054  | 2.192  | 3.095  | 2.482  | 2.718  | 2.441  | 2.171  | 2.573  | 67116  | CUEDC2   | NM_001164295_19_-_1 |
| Loxl4         | -2.405 | -1.898 | -3.474 | -3.624 | -2.321 | -2.927 | -3.762 | -3.368 | -1.926 | -0.810 | 67573  | LOXL4    | NM_001164311_19_-_1 |
| Wars          | 4.591  | 4.602  | 4.516  | 4.756  | 5.103  | 4.804  | 4.870  | 4.953  | 5.774  | 5.287  | 22375  | WARS     | NM_001164314_12_-_1 |
| Ccser1        | -2.966 | -1.653 | 2.160  | 2.129  | 0.389  | 0.880  | -0.353 | -0.613 | -4.981 | -3.517 | 232035 | CCSER1   | NM_001164316_6_+_1  |
| Chadl         | -3.028 | -2.349 | -0.201 | -1.099 | -3.008 | -2.811 | -0.833 | -0.986 | 0.187  | -0.984 | 214685 | CHADL    | NM_001164320_15_-_1 |
| Trpm7         | 4.675  | 3.954  | 4.211  | 3.923  | 3.682  | 4.382  | 3.871  | 3.864  | 4.293  | 4.686  | 58800  | TRPM7    | NM_001164325_2_-_1  |
| Phf11b        | 6.782  | 6.561  | 8.155  | 7.737  | 7.600  | 6.959  | 7.804  | 7.004  | 6.529  | 5.094  | 236451 | PHF11    | NM_001164327_14_-_1 |
| Gm6904        | -0.672 | -1.356 | 1.974  | 1.608  | 3.024  | 2.425  | 1.855  | -0.035 | 0.141  | -2.226 | 628693 | NA       | NM_001164329_14_-_1 |
| March5        | 4.931  | 4.646  | 4.525  | 4.551  | 4.414  | 4.197  | 4.290  | 4.228  | 4.886  | 4.530  | 69104  | MARCH5   | NM_001164336_19_+_1 |
| March5        | 2.542  | 2.317  | 2.993  | 2.968  | 2.885  | 2.828  | 2.216  | 2.119  | 2.769  | 2.354  | 69104  | MARCH5   | NM_001164337_19_+_1 |
| Efemp2        | -4.845 | -4.573 | -2.509 | -2.591 | -2.855 | -4.353 | -2.904 | -4.035 | -2.203 | -0.208 | 58859  | EFEMP2   | NM_001164352_19_+_1 |
| Ska1          | -0.852 | -1.917 | 1.785  | -0.506 | 2.526  | -0.588 | 2.083  | -2.546 | 0.594  | -3.031 | 66468  | SKA1     | NM_001164355_18_-_1 |
| Slc25a25      | 2.241  | 2.651  | 4.790  | 4.784  | 4.608  | 4.422  | 4.302  | 4.177  | 3.860  | 4.315  | 227731 | SLC25A25 | NM_001164357_2_-_1  |
| Slc25a25      | -4.885 | -4.981 | -2.596 | -2.087 | -4.000 | -3.291 | -2.942 | -4.009 | -1.468 | -1.607 | 227731 | SLC25A25 | NM_001164358_2_-_1  |
| Erlin1        | 2.522  | 3.246  | 4.208  | 3.949  | 3.492  | 3.052  | 3.500  | 2.482  | 3.592  | 3.312  | 226144 | ERLIN1   | NM_001164359_19_-_1 |
| Erlin1        | 4.227  | 4.895  | 6.728  | 6.478  | 6.136  | 6.067  | 5.694  | 6.004  | 6.343  | 6.734  | 226144 | ERLIN1   | NM_001164360_19_-_1 |

|           |        |        |        |        |        |        |        |        |        |        |           |           |                    |
|-----------|--------|--------|--------|--------|--------|--------|--------|--------|--------|--------|-----------|-----------|--------------------|
| Plekha8   | 0.096  | 1.020  | 2.604  | 3.448  | 1.498  | 2.687  | 0.685  | 2.866  | 1.429  | 3.216  | 231999    | PLEKHA8   | NM_001164361_6_+1  |
| Cep55     | -1.444 | -4.590 | 0.639  | 1.601  | 2.008  | 0.964  | 0.258  | -0.332 | -1.901 | -1.757 | 74107     | CEP55     | NM_001164362_19_+1 |
| Nt5c2     | -4.592 | -4.338 | -3.022 | -3.669 | -3.693 | -2.882 | -2.155 | -2.339 | -4.705 | -4.900 | 76952     | NT5C2     | NM_001164363_19_-1 |
| Nt5c2     | -2.971 | -1.398 | -2.766 | -3.270 | -4.030 | -4.318 | -2.753 | -4.364 | -3.152 | -2.967 | 76952     | NT5C2     | NM_001164365_19_-1 |
| Atp13a2   | 5.245  | 4.444  | 3.917  | 3.731  | 3.450  | 3.397  | 3.093  | 3.395  | 5.884  | 5.331  | 74772     | ATP13A2   | NM_001164366_4_+1  |
| Rab11fip2 | -0.734 | -2.312 | -1.708 | -2.866 | -1.800 | -2.907 | -3.069 | -2.557 | -3.427 | -2.658 | 74998     | RAB11FIP2 | NM_001164367_19_-1 |
| Bcas1     | 1.685  | 1.301  | -2.070 | -0.573 | 2.753  | 2.793  | 1.963  | 1.361  | -0.230 | -0.715 | 76960     | BCAS1     | NM_001164369_2_-1  |
| Mipol1    | 1.777  | 1.883  | 2.095  | 1.455  | 1.688  | 1.444  | 1.267  | 0.327  | -0.236 | -0.928 | 73490     | MIPOL1    | NM_001164370_12_+1 |
| Gm17455   | -4.981 | -4.981 | -4.957 | -3.268 | -4.616 | -4.869 | -4.970 | -2.126 | -3.491 | -2.367 | 100302688 | C10orf105 | NM_001164374_10_+1 |
| Ptpro     | -3.485 | -4.981 | -4.711 | -4.815 | -3.366 | -3.140 | -1.760 | -2.027 | 0.617  | -0.230 | 19277     | PTPRO     | NM_001164401_6_+1  |
| Ptpro     | 3.090  | 3.960  | 2.043  | 2.798  | 5.268  | 6.733  | 5.199  | 6.482  | 5.193  | 7.445  | 19277     | PTPRO     | NM_001164402_6_+1  |
| Ptpro     | 4.378  | 3.917  | 3.699  | 3.239  | 5.440  | 5.883  | 6.822  | 7.149  | 8.696  | 8.769  | 19277     | PTPRO     | NM_001164403_6_+1  |
| Sra1      | -1.048 | -0.373 | -1.910 | -1.779 | -1.432 | -1.051 | -1.488 | -2.884 | -1.106 | -3.343 | 24068     | SRA1      | NM_001164406_18_-1 |
| Cnot4     | 3.557  | 3.812  | 2.974  | 2.413  | 3.514  | 3.249  | 3.103  | 2.904  | 2.514  | 2.535  | 53621     | CNOT4     | NM_001164411_6_-1  |
| Cnot4     | 4.197  | 4.623  | 4.015  | 3.153  | 4.086  | 3.642  | 4.186  | 3.533  | 3.376  | 3.121  | 53621     | CNOT4     | NM_001164412_6_-1  |
| Cnot4     | 3.295  | 2.176  | 3.246  | 3.503  | 2.816  | 3.137  | 2.852  | 2.938  | 3.480  | 3.627  | 53621     | CNOT4     | NM_001164413_6_-1  |
| Cnot4     | 3.266  | 3.539  | 2.832  | 3.305  | 2.658  | 2.360  | 3.181  | 3.014  | 2.680  | 2.665  | 53621     | CNOT4     | NM_001164414_6_-1  |
| Pqlc1     | 3.402  | 4.059  | 5.524  | 5.141  | 4.242  | 4.942  | 4.901  | 5.255  | 6.155  | 6.069  | 66943     | PQLC1     | NM_001164420_18_+1 |
| Pqlc1     | -1.019 | 0.350  | 6.125  | 6.132  | 4.749  | 5.181  | 4.122  | 5.041  | 3.165  | 3.712  | 66943     | PQLC1     | NM_001164421_18_+1 |
| Pqlc1     | -0.415 | 1.933  | 5.381  | 5.526  | 3.693  | 4.667  | 3.791  | 3.669  | 2.818  | 3.605  | 66943     | PQLC1     | NM_001164422_18_+1 |
| Pqlc1     | -4.981 | -4.981 | -2.681 | -2.491 | -3.248 | -3.525 | -3.873 | -3.956 | -3.357 | -3.593 | 66943     | PQLC1     | NM_001164423_18_+1 |
| Pqlc1     | -4.981 | -4.981 | -2.798 | -2.848 | -3.595 | -3.440 | -4.110 | -4.370 | -3.377 | -4.054 | 66943     | PQLC1     | NM_001164424_18_+1 |
| Kcnk13    | -2.585 | -3.085 | -2.812 | -2.065 | -2.294 | -3.825 | -1.681 | -2.017 | -2.101 | -1.329 | 217826    | KCNK13    | NM_001164426_12_+1 |
| Kcnk13    | -3.674 | -3.831 | -3.008 | -1.316 | -4.272 | -4.803 | -3.123 | -0.541 | -4.151 | -0.168 | 217826    | KCNK13    | NM_001164427_12_+1 |
| Mical1    | 1.044  | 0.807  | 0.633  | 0.862  | 1.911  | 1.836  | 1.255  | 1.282  | -3.285 | -0.922 | 171580    | MICAL1    | NM_001164433_10_+1 |
| Ankrd33b  | -1.327 | -4.981 | 3.007  | 3.119  | 3.011  | 2.642  | 1.189  | 0.450  | -3.997 | -1.051 | 67434     | ANKRD33B  | NM_001164441_15_-1 |
| Dpys      | -4.981 | -4.981 | -4.989 | -3.270 | -4.965 | -4.942 | -2.621 | -2.340 | -2.792 | -0.944 | 64705     | DPYS      | NM_001164466_15_-1 |
| Nip7      | -0.889 | -4.981 | -3.732 | -3.110 | -1.790 | -2.392 | -4.949 | -2.614 | -2.048 | -2.491 | 66164     | NIP7      | NM_001164472_8_+1  |
| Ifih1     | 0.418  | -0.058 | 1.269  | 1.651  | 0.607  | 1.648  | 1.859  | 1.379  | -0.345 | 1.648  | 71586     | IFIH1     | NM_001164477_2_-1  |
| Sipa1     | 3.601  | 3.017  | 4.157  | 4.223  | 4.203  | 4.407  | 3.742  | 4.370  | 5.056  | 5.414  | 20469     | SIPA1     | NM_001164480_19_-1 |
| Sipa1     | 2.707  | 2.463  | 3.367  | 2.542  | 3.691  | 3.330  | 3.985  | 3.626  | 3.765  | 3.495  | 20469     | SIPA1     | NM_001164481_19_-1 |
| Sipa1     | 0.493  | 2.560  | 0.070  | 0.646  | 1.088  | 0.654  | 1.661  | 1.285  | 2.421  | 2.431  | 20469     | SIPA1     | NM_001164482_19_-1 |
| Synj1     | 3.509  | 3.351  | 5.291  | 3.927  | 5.180  | 5.299  | 5.246  | 4.592  | 5.473  | 5.598  | 104015    | SYNJ1     | NM_001164483_16_-1 |
| Fam170b   | -4.981 | -4.981 | -4.821 | -4.973 | -4.502 | -4.689 | -4.467 | -4.483 | -4.394 | -2.962 | 105511    | FAM170B   | NM_001164485_14_+1 |
| Wars      | 3.827  | 3.874  | 3.356  | 3.269  | 2.566  | 2.796  | 3.320  | 3.196  | 4.424  | 2.310  | 22375     | WARS      | NM_001164488_12_-1 |
| Klhl29    | -1.652 | -2.895 | -2.780 | -4.053 | -3.773 | -2.897 | -3.292 | -3.230 | -2.549 | -4.342 | 208439    | KLHL29    | NM_001164493_12_-1 |
| Syn3      | -4.896 | -3.315 | -4.779 | -3.679 | -4.681 | -4.186 | -4.420 | -4.939 | -4.981 | -4.981 | 27204     | SYN3      | NM_001164495_10_-1 |
| Papd5     | 3.474  | 3.070  | 3.318  | 2.725  | 3.307  | 3.481  | 3.414  | 3.099  | 2.974  | 4.200  | 214627    | PAPD5     | NM_001164497_8_+1  |
| Papd5     | 3.523  | 3.992  | 3.866  | 3.707  | 3.507  | 2.931  | 3.017  | 3.422  | 4.120  | 3.638  | 214627    | PAPD5     | NM_001164498_8_+1  |
| Papd5     | -1.511 | 2.176  | -0.852 | -0.358 | 1.645  | 0.583  | 0.980  | -0.201 | 1.089  | -1.402 | 214627    | PAPD5     | NM_001164499_8_+1  |
| Akap11    | 5.165  | 5.130  | 5.498  | 5.432  | 4.949  | 5.280  | 4.776  | 4.687  | 3.795  | 3.816  | 219181    | AKAP11    | NM_001164503_14_-1 |
| Serpinb9c | -4.981 | -2.690 | -4.981 | -4.981 | -4.981 | -4.981 | -4.981 | -4.981 | -4.981 | -4.981 | 20707     | NA        | NM_001164524_13_-1 |
| Tstd1     | -2.948 | -0.430 | -0.611 | -1.745 | -0.231 | -1.229 | -1.103 | -2.101 | -0.677 | -1.600 | 226654    | TSTD1     | NM_001164525_1_+1  |
| Zfyve27   | 4.421  | 4.611  | 4.215  | 4.275  | 4.798  | 4.876  | 4.464  | 4.561  | 4.841  | 4.842  | 319740    | ZFYVE27   | NM_001164531_19_+1 |
| Cpsf4l    | -4.981 | -4.981 | -4.884 | -4.977 | -4.978 | -4.978 | -4.962 | -4.978 | -4.797 | -4.969 | 52670     | CPSF4L    | NM_001164532_11_-1 |
| Dap3      | 3.154  | 2.731  | 2.316  | 1.701  | 3.001  | 2.406  | 2.854  | 1.631  | 2.857  | 1.878  | 65111     | DAP3      | NM_001164533_3_-1  |
| Pdzk1ip1  | -4.981 | -4.981 | -1.428 | 0.328  | -3.989 | -1.991 | -4.944 | -3.408 | -4.981 | -4.981 | 67182     | PDZK1IP1  | NM_001164557_4_+1  |
| Pdzk1ip1  | -1.885 | -0.025 | 0.139  | 1.761  | -1.533 | 1.462  | -1.088 | 0.892  | -3.070 | -1.807 | 67182     | PDZK1IP1  | NM_001164558_4_+1  |
| Trmt1     | 3.601  | 1.773  | 3.618  | 2.252  | 3.656  | 2.253  | 3.647  | 2.448  | 3.400  | 1.942  | 212528    | TRMT1     | NM_001164559_8_+1  |
| Trmt1     | 3.431  | 2.155  | 3.165  | 2.011  | 2.611  | 1.677  | 3.124  | 0.694  | 3.125  | 3.031  | 212528    | TRMT1     | NM_001164560_8_+1  |
| Exosc1    | -0.008 | -0.348 | -0.980 | -1.004 | -1.095 | -1.684 | -0.952 | -2.247 | -1.571 | -2.329 | 66583     | EXOSC1    | NM_001164561_19_-1 |
| Sec22c    | 2.436  | 1.491  | 1.873  | 1.295  | 0.950  | 1.630  | 0.656  | 1.590  | 2.997  | 2.448  | 215474    | SEC22C    | NM_001164562_9_-1  |
| Amigo2    | -4.981 | -3.117 | -4.445 | -4.322 | -4.575 | -4.675 | -4.756 | -3.004 | -4.486 | -4.643 | 105827    | AMIGO2    | NM_001164563_15_-1 |
| Egfl7     | -0.353 | -0.392 | -2.032 | -0.355 | -2.058 | -0.838 | -2.980 | -0.376 | -1.550 | -2.629 | 353156    | EGFL7     | NM_001164564_2_+1  |
| Acnat1    | -4.981 | -4.981 | -4.978 | -4.978 | -4.912 | -4.959 | -4.845 | -2.562 | -4.981 | -4.981 | 230161    | NA        | NM_001164565_4_-1  |
| Spats2l   | -2.274 | -4.981 | -4.818 | -4.818 | -3.966 | -4.269 | -3.097 | -4.648 | -4.981 | -4.981 | 67198     | SPATS2L   | NM_001164566_1_+1  |
| Vill      | -1.147 | -4.981 | 4.236  | -4.873 | 4.043  | -4.736 | 4.686  | -4.784 | 6.460  | -3.480 | 22351     | VILL      | NM_001164567_9_+1  |
| Sipa1     | 2.006  | 3.532  | 3.019  | 4.044  | 4.455  | 4.237  | 3.863  | 5.117  | 6.036  | 5.852  | 20469     | SIPA1     | NM_001164568_19_-1 |
| Rffl      | -1.438 | 0.312  | -2.546 | -3.471 | -1.980 | -1.820 | -1.098 | -1.569 | 0.979  | 1.992  | 67338     | RFFL      | NM_001164569_11_-1 |
| Rffl      | 0.311  | -3.244 | -1.481 | -1.915 | -0.851 | -3.173 | -0.636 | -0.437 | 0.972  | 0.396  | 67338     | RFFL      | NM_001164570_11_-1 |
| Rffl      | -1.631 | -3.908 | -1.325 | -1.137 | 0.732  | -0.217 | -2.049 | -0.983 | 3.335  | 2.107  | 67338     | RFFL      | NM_001164571_11_-1 |
| Snrk      | 4.058  | 2.843  | 2.948  | 1.756  | 2.865  | 2.523  | 2.845  | 3.604  | 4.602  | 3.405  | 20623     | SNRK      | NM_001164572_9_+1  |
| Myo1h     | 3.847  | 3.008  | 2.424  | 2.519  | 4.100  | 3.940  | 3.000  | 1.761  | 2.973  | 1.595  | 231646    | MYO1H     | NM_001164573_5_+1  |
| Kbtbd3    | 2.459  | 2.547  | 2.773  | 2.135  | 2.417  | 1.724  | 2.537  | 1.767  | 1.915  | 1.958  | 69149     | KBTBD3    | NM_001164574_9_+1  |
| Zfp169    | 0.273  | 0.601  | 1.705  | 1.721  | 1.273  | 1.882  | 1.493  | 0.966  | 0.749  | 2.164  | 67911     | ZNF169    | NM_001164575_13_-1 |
| Zfp169    | -0.481 | -0.119 | -3.333 | -3.828 | -2.411 | -3.245 | -2.647 | -2.630 | -3.843 | -4.973 | 67911     | ZNF169    | NM_001164576_13_-1 |
| Tsr2      | 2.538  | 2.759  | 2.114  | 2.045  | 1.729  | 1.715  | 1.878  | 1.938  | 0.960  | 0.267  | 69499     | TSR2      | NM_001164578_X_-1  |
| BC030336  | 2.470  | 1.685  | 2.826  | 2.030  | 2.404  | 2.345  | 2.896  | 1.964  | 2.670  | 2.935  | 233812    | C10orf52  | NM_001164580_7_+1  |
| Zfp961    | 3.337  | 2.788  | 3.106  | 2.852  | 4.282  | 3.939  | 3.857  | 3.393  | 3.597  | 3.918  | 234413    | NA        | NM_001164581_8_+1  |
| Dnajc6    | -4.981 | -4.981 | -4.988 | -4.877 | -4.704 | -4.872 | -4.890 | -4.848 | -4.728 | -4.981 | 72685     | DNAJC6    | NM_001164583_4_+1  |
| Dnajc6    | -4.981 | -3.569 | -3.757 | -4.638 | -4.450 | -4.498 | -4.858 | -4.119 | -3.644 | -4.981 | 72685     | DNAJC6    | NM_001164584_4_+1  |
| Dnajc6    | -4.981 | -4.000 | -4.458 | -4.885 | -4.627 | -4.846 | -4.911 | -4.869 | -4.045 | -4.981 | 72685     | DNAJC6    | NM_001164585_4_+1  |
| Pdzn4     | -4.981 | -4.981 | -4.978 | -4.978 | -4.954 | -4.965 | -4.981 | -4.981 | -4.981 | -4.981 | 239618    | PDZRN4    | NM_001164593_15_+1 |
| Pdzn4     | -4.981 | -4.981 | -4.967 | -3.698 | -3.093 | 0.122  | -4.975 | -4.972 | -4.981 | -4.981 | 239618    | PDZRN4    | NM_001164594_15_+1 |

|               |        |        |        |        |        |        |        |        |        |        |           |                   |                        |
|---------------|--------|--------|--------|--------|--------|--------|--------|--------|--------|--------|-----------|-------------------|------------------------|
| Zfp512b       | 4.184  | 4.469  | 4.336  | 4.165  | 4.323  | 4.233  | 3.862  | 3.576  | 3.607  | 3.789  | 269401    | ZNF512B           | NM_001164597_2_-1      |
| Irf2bp2       | 8.943  | 9.023  | 5.959  | 5.965  | 7.319  | 7.380  | 7.232  | 7.155  | 7.128  | 7.432  | 270110    | IRF2BP2           | NM_001164598_8_-1      |
| Puf60         | 4.389  | 4.416  | 4.192  | 3.812  | 4.420  | 4.263  | 4.371  | 3.772  | 2.993  | 3.203  | 67959     | PUF60             | NM_001164600_15_-1     |
| Amigo2        | -4.981 | -1.488 | -3.175 | -1.399 | -4.012 | -2.000 | -4.186 | -0.477 | -2.167 | -4.464 | 105827    | AMIGO2            | NM_001164602_15_-1     |
| Nsmce2        | -0.184 | 1.663  | 0.956  | 1.330  | 0.102  | 0.483  | 0.195  | 0.814  | 0.162  | 1.422  | 68501     | NSMCE2            | NM_001164604_15_+1     |
| Maf1          | 4.482  | 4.313  | 3.200  | 3.524  | 3.678  | 3.746  | 3.646  | 4.022  | 4.256  | 4.849  | 68877     | MAF1              | NM_001164607_15_+1     |
| Maf1          | 5.546  | 5.230  | 5.184  | 5.445  | 4.901  | 4.871  | 4.975  | 5.117  | 5.923  | 5.574  | 68877     | MAF1              | NM_001164608_15_+1     |
| Smpd4         | -3.812 | 0.955  | -2.747 | -0.509 | -3.530 | -4.023 | -1.351 | -1.601 | -0.665 | -4.256 | 77626     | SMPD4             | NM_001164609_16_+1     |
| Smpd4         | 3.526  | 3.487  | 3.736  | 3.662  | 3.938  | 3.919  | 3.710  | 3.383  | 3.899  | 3.720  | 77626     | SMPD4             | NM_001164610_16_+1     |
| Smpd4         | -2.320 | 0.400  | -1.436 | -1.918 | -1.674 | -2.008 | 0.373  | -2.123 | -3.833 | -2.514 | 77626     | SMPD4             | NM_001164611_16_+1     |
| Atp13a4       | -4.981 | -4.981 | -4.981 | -4.981 | -4.981 | -4.981 | -4.823 | -4.976 | -4.981 | -3.590 | 224079    | ATP13A4           | NM_001164612_16_-1     |
| Atp13a4       | -4.981 | -4.981 | -4.981 | -4.981 | -4.981 | -4.981 | -4.032 | -3.648 | -1.810 | -4.462 | 224079    | ATP13A4           | NM_001164613_16_-1     |
| Ccdc159       | -4.083 | -3.695 | -4.582 | -4.256 | -4.276 | -4.933 | -4.967 | -4.956 | -4.684 | -4.981 | 67119     | CCDC159           | NM_001164614_9_+1      |
| Ccdc157       | 0.650  | 0.281  | 0.646  | -0.707 | -0.169 | 0.283  | -0.240 | 0.536  | 0.312  | 0.734  | 216516    | CCDC157           | NM_001164620_11_-1     |
| Rnf14         | 0.148  | 1.666  | 1.830  | 2.261  | 1.097  | 1.521  | 0.250  | 0.995  | 1.450  | 1.706  | 56736     | RNF14             | NM_001164621_18_+1     |
| Rnf14         | 4.498  | 4.475  | 4.129  | 4.715  | 3.953  | 4.486  | 3.331  | 4.476  | 4.704  | 4.991  | 56736     | RNF14             | NM_001164622_18_+1     |
| Zfp809        | 3.699  | 4.374  | 3.553  | 4.115  | 4.117  | 4.241  | 3.123  | 3.583  | 2.787  | 3.467  | 235047    | NA                | NM_001164624_9_+1      |
| Cdpf1         | 1.398  | 1.704  | 0.482  | -0.118 | -0.469 | -0.129 | -0.697 | -0.250 | -1.077 | 0.012  | 72355     | CDPF1             | NM_001164625_15_-1     |
| Cdpf1         | 4.048  | 3.995  | 2.720  | 2.576  | 2.105  | 2.381  | 2.131  | 2.614  | 1.718  | 1.649  | 72355     | CDPF1             | NM_001164626_15_-1     |
| Arhgap8       | -4.981 | -4.981 | -2.675 | 1.077  | -3.557 | -4.414 | -4.978 | -4.513 | -4.981 | -4.981 | 73167     | ARHGAP8 PRR5-AFNM | NM_001164627_15_+1     |
| Arhgap8       | -4.981 | -4.981 | -0.483 | -0.571 | -3.106 | -3.675 | -4.873 | -3.747 | -4.981 | -4.981 | 73167     | ARHGAP8 PRR5-AFNM | NM_001164628_15_+1     |
| Endov         | 3.506  | 3.409  | 3.697  | 3.229  | 3.883  | 3.635  | 3.189  | 2.943  | 3.287  | 2.779  | 338371    | ENDOV             | NM_001164636_11_+1     |
| Slk           | 6.317  | 6.233  | 7.323  | 6.921  | 6.502  | 6.296  | 6.943  | 6.989  | 7.999  | 8.024  | 20874     | SLK               | NM_001164639_19_+1     |
| Apol7a        | -4.981 | -4.981 | -3.035 | -4.957 | -4.996 | -4.996 | -4.920 | -4.950 | -4.981 | -4.981 | 75761     | NA                | NM_001164640_15_-1     |
| Trappc9       | -1.686 | -0.733 | -4.002 | -3.923 | -3.165 | -1.793 | -2.318 | -4.273 | -3.475 | -3.668 | 76510     | TRAPPC9           | NM_001164641_15_-1     |
| Trappc9       | -0.400 | 0.990  | 0.460  | 0.082  | 0.537  | 0.667  | -0.056 | 0.068  | 0.833  | 0.198  | 76510     | TRAPPC9           | NM_001164642_15_-1     |
| Trappc9       | -0.821 | -0.871 | 0.106  | -0.035 | 0.920  | 0.370  | -0.117 | -0.912 | 0.747  | 0.554  | 76510     | TRAPPC9           | NM_001164643_15_-1     |
| 9530053A07Rik | -4.981 | -2.997 | -4.314 | -4.710 | -4.855 | -4.974 | -4.635 | -4.881 | -4.981 | -4.981 | 319482    | NA                | NM_001164655_7_+1      |
| Catsperg1     | -1.108 | -0.245 | 1.253  | 0.917  | 1.321  | 0.789  | -0.291 | -0.743 | 0.445  | -0.268 | 320225    | CATSPERG          | NM_001164658_7_-1      |
| Cyfi1         | 2.690  | 0.627  | -0.240 | 0.559  | 0.353  | 1.439  | 0.964  | 2.317  | 2.339  | 2.883  | 20430     | CYFI1             | NM_001164661_7_+1      |
| Cyfi1         | -1.497 | -0.004 | 0.270  | 0.331  | 1.293  | 0.781  | 0.482  | 0.897  | 1.624  | 0.007  | 20430     | CYFI1             | NM_001164662_7_+1      |
| Soga1         | 4.923  | 5.111  | 3.837  | 3.503  | 3.929  | 3.220  | 4.216  | 4.053  | 2.630  | 3.750  | 320706    | SOGA1             | NM_001164663_2_-1      |
| Dnah6         | -4.981 | -0.553 | -4.022 | -2.666 | -4.655 | -3.093 | -4.976 | -3.988 | -4.981 | -4.981 | 330355    | DNAH6             | NM_001164669_6_-1      |
| Dnaj1         | 1.791  | 2.160  | 2.656  | 2.787  | 2.076  | 1.365  | 1.448  | 1.829  | 1.741  | 1.703  | 15502     | DNAJ1             | NM_001164671_4_+1      |
| Dnaj1         | 2.979  | 2.040  | 1.202  | 1.370  | 0.949  | 1.175  | 0.938  | 0.317  | -0.976 | -0.752 | 15502     | DNAJ1             | NM_001164672_4_+1      |
| Zfp229        | 1.906  | 2.516  | 2.179  | 2.150  | 1.643  | 1.719  | 2.100  | 1.738  | 1.732  | 2.327  | 381067    | NA                | NM_001164676_17_+1     |
| Pdcd6ip       | -3.770 | -3.274 | 2.002  | 0.142  | -0.078 | 0.207  | -0.500 | -1.058 | 1.254  | 2.455  | 18571     | PDCD6IP           | NM_001164677_9_-1      |
| Pdcd6ip       | 1.752  | 1.487  | 3.145  | 3.428  | 1.900  | 2.404  | 2.873  | 2.951  | 3.877  | 3.716  | 18571     | PDCD6IP           | NM_001164678_9_-1      |
| Ano8          | 1.722  | 1.722  | 1.420  | 1.116  | 1.659  | 1.495  | 1.643  | 1.816  | 2.940  | 3.251  | 382014    | ANO8              | NM_001164679_8_-1      |
| Mpp4          | -3.352 | -0.349 | -3.614 | -2.883 | -2.810 | -2.979 | -2.030 | -3.910 | -3.026 | -4.531 | 227157    | MPP4              | NM_001164682_1_-1      |
| Tmem29        | 1.208  | 1.684  | 1.577  | 1.673  | 1.404  | 1.692  | 1.083  | 0.736  | -1.118 | -0.783 | 382245    | NA                | NM_001164683_X_-1      |
| Tmem29        | -4.981 | -2.191 | -3.106 | -4.062 | -2.478 | -3.503 | -4.458 | -4.948 | -4.981 | -4.981 | 382245    | NA                | NM_001164684_X_-1      |
| Tmem29        | 4.868  | 5.106  | 4.528  | 4.768  | 4.614  | 4.904  | 4.439  | 4.093  | 1.973  | 2.371  | 382245    | NA                | NM_001164686_X_-1      |
| Gm6710        | -3.451 | -1.325 | -1.148 | -2.163 | -1.385 | -0.756 | 0.048  | -1.623 | -0.143 | -1.271 | 626832    | ZNF442            | NM_001164689_2_-1      |
| Gm6710        | 1.043  | -0.772 | 0.001  | -1.274 | 0.037  | 0.059  | 0.074  | -2.242 | 0.126  | 0.587  | 626832    | ZNF442            | NM_001164689_dup1_2_+1 |
| Renbp         | 2.666  | 2.522  | 2.804  | 2.873  | 1.567  | 1.211  | 2.099  | 2.330  | 2.479  | 2.553  | 19703     | RENBP             | NM_001164704_X_-1      |
| Hspb2         | -0.641 | -1.566 | -4.926 | -4.926 | -4.972 | -4.835 | -4.981 | -4.981 | -4.981 | -4.981 | 69253     | HSPB2             | NM_001164708_9_-1      |
| Syvn1         | 0.768  | 1.193  | -0.726 | -0.059 | -0.122 | -1.837 | 0.330  | 3.043  | 3.952  | 3.877  | 74126     | SYVN1             | NM_001164709_19_+1     |
| Sh3pxd2a      | 1.972  | 2.065  | 1.423  | 1.339  | 1.819  | 2.223  | 0.062  | 1.011  | 0.284  | -0.474 | 14218     | SH3PXD2A          | NM_001164717_19_-1     |
| Il33          | -4.981 | -4.981 | -4.578 | -4.974 | -4.981 | -4.978 | -4.936 | -4.641 | -4.981 | -4.981 | 77125     | IL33              | NM_001164724_19_+1     |
| Fcrl6         | -4.981 | -4.981 | -4.951 | -4.677 | -2.420 | -1.030 | -4.650 | -3.785 | -4.257 | -4.981 | 677296    | FCRL6             | NM_001164725_1_-1      |
| Gm10406       | -0.209 | -1.100 | -3.257 | -4.234 | -4.890 | -0.960 | -4.970 | -4.509 | -4.981 | -4.981 | 100038847 | NA                | NM_001164727_14_-1     |
| Tomm6         | 1.842  | 1.654  | 2.567  | 1.914  | 2.478  | 2.257  | 2.775  | 1.820  | 1.806  | 1.789  | 66119     | TOMM6             | NM_001164729_17_-1     |
| Mpp6          | 0.445  | 1.308  | 2.423  | 2.707  | 1.166  | 1.067  | 1.776  | 1.462  | 1.012  | 1.143  | 56524     | MPP6              | NM_001164733_6_+1      |
| Mpp6          | -4.806 | -3.733 | -4.618 | -4.890 | -4.779 | -4.946 | -4.662 | -4.904 | -4.302 | -4.835 | 56524     | MPP6              | NM_001164734_6_+1      |
| Crlf2         | 0.706  | -3.996 | -1.316 | -1.832 | -2.946 | -4.711 | 0.276  | -0.590 | 0.711  | -1.093 | 57914     | CRLF2             | NM_001164735_5_-1      |
| Ptp4a2        | 6.501  | 6.384  | 6.834  | 6.957  | 7.451  | 7.303  | 7.401  | 7.385  | 6.364  | 8.039  | 19244     | PTP4A2            | NM_001164745_4_+1      |
| Rarres1       | -4.981 | -4.981 | -4.973 | -3.583 | -1.696 | 0.770  | -3.232 | -0.702 | -3.925 | -4.981 | 109222    | RARRES1           | NM_001164763_3_-1      |
| Robo3         | 4.878  | 5.135  | -3.695 | -2.540 | -2.999 | -4.493 | -3.043 | -2.663 | -4.981 | -4.227 | 19649     | ROBO3             | NM_001164767_9_-1      |
| Fbxw2         | 2.827  | 3.370  | 3.231  | 1.521  | 3.157  | 1.705  | 1.793  | 2.108  | 2.262  | 3.178  | 30050     | FBXW2             | NM_001164768_2_-1      |
| Fbxw2         | 3.098  | 2.921  | 2.695  | 2.562  | 3.076  | 3.013  | 2.942  | 2.790  | 3.393  | 3.436  | 30050     | FBXW2             | NM_001164769_2_-1      |
| Fbxw2         | 2.979  | 3.558  | 3.188  | 2.852  | 2.601  | 3.434  | 3.435  | 2.936  | 3.790  | 3.350  | 30050     | FBXW2             | NM_001164770_2_-1      |
| Fbxw2         | 3.520  | 3.705  | 3.867  | 3.577  | 3.665  | 3.499  | 3.380  | 3.565  | 3.856  | 3.772  | 30050     | FBXW2             | NM_001164772_2_-1      |
| Eomes         | -2.917 | -1.552 | -2.296 | -2.147 | -4.125 | -3.588 | -4.009 | -3.438 | -2.815 | -1.404 | 13813     | EOMES             | NM_001164789_9_+1      |
| Scg3          | -4.981 | -4.981 | -4.981 | -4.981 | -4.331 | -4.791 | -4.965 | -4.902 | -4.981 | -4.981 | 20255     | SCG3              | NM_001164790_9_-1      |
| Zak           | -4.981 | -2.296 | 3.259  | 3.346  | 2.376  | 0.738  | 3.171  | 2.801  | 4.028  | 3.661  | 65964     | ZAK               | NM_001164791_2_+1      |
| Tpbg          | -4.981 | -4.981 | -1.954 | -3.369 | -2.698 | -3.244 | -3.239 | -4.306 | -2.590 | -0.988 | 21983     | TPBG              | NM_001164792_9_+1      |
| Polr2m        | 3.200  | 2.382  | 1.951  | 2.049  | 2.027  | 2.412  | 0.434  | 0.907  | 0.680  | -1.734 | 28015     | POLR2M            | NM_001164793_9_-1      |
| Slc38a10      | -3.205 | -0.430 | 0.122  | -1.662 | -1.891 | -1.941 | -0.302 | -1.073 | 1.266  | -2.714 | 72055     | SLC38A10          | NM_001164798_11_-1     |
| Slc38a10      | 4.612  | 4.366  | 4.658  | 4.783  | 4.580  | 4.405  | 4.803  | 5.077  | 5.971  | 5.897  | 72055     | SLC38A10          | NM_001164799_11_-1     |
| Slc38a10      | 3.803  | 4.049  | 3.217  | 3.350  | 3.357  | 3.001  | 3.534  | 2.608  | 4.399  | 4.591  | 72055     | SLC38A10          | NM_001164800_11_-1     |
| Slc38a10      | -1.316 | -0.405 | -1.117 | -1.628 | -0.611 | -2.145 | -3.164 | -2.292 | -0.416 | -1.146 | 72055     | SLC38A10          | NM_001164801_11_-1     |
| Slc38a10      | 2.529  | 2.677  | 2.890  | 2.330  | 1.671  | 1.724  | 1.015  | 1.679  | 1.817  | 1.459  | 72055     | SLC38A10          | NM_001164802_11_-1     |
| Coro2a        | 6.509  | 6.577  | 6.383  | 6.331  | 6.911  | 6.869  | 6.398  | 6.078  | 6.256  | 5.695  | 107684    | CORO2A            | NM_001164804_4_-1      |

|         |        |        |        |        |        |        |        |        |        |        |           |           |                    |
|---------|--------|--------|--------|--------|--------|--------|--------|--------|--------|--------|-----------|-----------|--------------------|
| Thsd7a  | -4.981 | -4.981 | -4.931 | -3.995 | -4.447 | 0.715  | -4.885 | -4.622 | -4.981 | -4.981 | 330267    | THSD7A    | NM_001164805_6_-1  |
| Bend4   | 3.400  | 2.099  | 2.051  | 0.380  | 4.909  | 3.245  | 3.511  | 1.426  | -0.440 | 0.125  | 666938    | BEND4     | NM_001164806_5_-1  |
| Pet117  | -4.981 | -2.752 | -4.942 | -3.046 | -3.321 | -4.701 | -2.472 | -4.075 | -3.100 | -2.432 | 100048644 | PET117    | NM_001164813_2_+1  |
| Aar2    | 0.684  | 1.569  | -1.814 | 0.102  | -1.424 | -0.135 | -0.972 | 0.486  | -0.873 | 0.307  | 68295     | AAR2      | NM_001164818_2_+1  |
| Slc52a3 | -4.221 | -0.362 | -0.616 | -1.714 | -2.799 | -4.624 | -4.959 | -4.701 | -0.525 | -2.984 | 69698     | SLC52A3   | NM_001164819_2_+1  |
| Slc52a3 | 2.615  | -2.745 | -1.908 | -2.668 | -3.013 | -4.105 | -2.776 | -1.147 | -0.669 | 2.098  | 69698     | SLC52A3   | NM_001164820_2_+1  |
| Tmem42  | -1.271 | -1.691 | -3.719 | -2.382 | -2.622 | -4.160 | -2.989 | -4.490 | -4.981 | -2.694 | 66079     | TMEM42    | NM_001164823_9_+1  |
| Zfyve19 | 0.327  | 0.626  | -0.220 | -0.712 | -0.177 | -1.602 | -0.195 | -2.235 | -0.034 | -1.277 | 72008     | ZFYVE19   | NM_001164827_2_+1  |
| Aste1   | 0.808  | 0.100  | -0.198 | -1.975 | -0.378 | -1.347 | -0.021 | -0.865 | -0.107 | -1.020 | 66595     | ASTE1     | NM_001164828_9_+1  |
| P2rx2   | -4.981 | -4.981 | -4.977 | -4.977 | -4.967 | -4.966 | -4.981 | -4.981 | -4.981 | -4.981 | 231602    | P2RX2     | NM_001164833_5_-1  |
| P2rx2   | -4.981 | -4.981 | -4.965 | -4.965 | -4.989 | -4.429 | -4.975 | -4.978 | -4.981 | -4.981 | 231602    | P2RX2     | NM_001164834_5_-1  |
| Lrrfp2  | 0.284  | -0.817 | -4.172 | -1.076 | -1.750 | -3.203 | -0.317 | -0.878 | 1.200  | 0.180  | 71268     | NA        | NM_001164838_9_+1  |
| Lpin2   | 3.521  | 3.152  | 2.165  | 3.624  | 3.105  | 3.997  | 3.411  | 3.118  | 2.830  | 2.307  | 64898     | LPIN2     | NM_001164885_17_+1 |
| Mia2    | 5.655  | 5.941  | 6.918  | 6.787  | 7.145  | 7.356  | 7.022  | 7.055  | 7.373  | 7.629  | 338320    | MIA2      | NM_001165253_12_+1 |
| Mia2    | -3.451 | 1.452  | 2.242  | 3.362  | 2.213  | 1.749  | 2.563  | 1.173  | 0.853  | 2.194  | 338320    | MIA2      | NM_001165254_12_+1 |
| Dcaf4   | 2.055  | 1.426  | 0.609  | -0.339 | 1.791  | 1.887  | 0.237  | 1.119  | 1.203  | 0.265  | 73828     | DCAF4     | NM_001165256_12_+1 |
| Pr3     | -1.146 | -2.363 | -2.572 | -4.396 | -1.152 | -2.832 | -1.866 | -1.643 | -0.246 | -3.034 | 75210     | PRR3      | NM_001165892_17_-1 |
| Akt1    | -0.443 | -0.483 | 0.430  | -0.508 | -1.363 | -1.548 | 1.072  | -0.156 | 2.286  | 1.050  | 11651     | AKT1      | NM_001165894_12_-1 |
| Ctnnb1  | 6.443  | 6.309  | 7.098  | 6.775  | 6.175  | 6.170  | 6.421  | 6.452  | 6.554  | 6.910  | 12387     | CTNNB1    | NM_001165902_9_+1  |
| Majin   | -2.075 | -4.981 | -4.941 | -4.829 | -4.953 | -4.909 | -4.955 | -4.614 | -2.834 | -4.981 | 622554    | MAJIN     | NM_001165919_19_+1 |
| Ccdc78  | -1.671 | -3.408 | -3.670 | -3.479 | -3.047 | -3.523 | -3.147 | -4.058 | -2.440 | -3.183 | 381077    | CCDC78    | NM_001165929_17_+1 |
| Glt8d1  | 4.830  | 5.038  | 2.364  | 2.610  | 1.977  | 2.180  | 2.412  | 3.260  | 3.550  | 4.087  | 76485     | GLT8D1    | NM_001165930_14_+1 |
| Rgs9    | -4.981 | -4.981 | -1.043 | 0.059  | -4.912 | -4.902 | -1.911 | -2.011 | -4.981 | -2.969 | 19739     | RG9       | NM_001165934_11_-1 |
| Aven    | -1.104 | 0.249  | 0.895  | 0.746  | 0.248  | -1.104 | 0.711  | -1.803 | -0.981 | -0.739 | 74268     | AVEN      | NM_001165935_2_+1  |
| Tshb    | -4.515 | -4.438 | -4.978 | -4.977 | -4.964 | -4.978 | -4.971 | -4.980 | -4.981 | -4.981 | 22094     | TSHB      | NM_001165939_3_-1  |
| Tshb    | -1.950 | -1.118 | -4.990 | -4.532 | -3.003 | -3.378 | -4.224 | -4.684 | -4.981 | -4.981 | 22094     | TSHB      | NM_001165940_3_-1  |
| Nsun6   | -0.518 | 0.873  | 1.164  | 0.459  | 1.201  | 1.638  | 0.983  | 1.131  | -1.065 | 0.248  | 74455     | NSUN6     | NM_001165941_2_-1  |
| Nsun6   | 1.203  | 0.536  | 0.327  | 0.722  | 1.419  | 1.283  | 0.954  | 0.132  | 0.530  | -1.356 | 74455     | NSUN6     | NM_001165942_2_-1  |
| Nsun6   | -4.953 | -2.213 | -4.686 | -4.945 | -3.684 | -4.957 | -1.336 | -4.836 | -3.212 | -4.622 | 74455     | NSUN6     | NM_001165943_2_-1  |
| Pogz    | 2.312  | 2.948  | 0.665  | 1.868  | 2.516  | 2.335  | 1.083  | 1.806  | 0.794  | 1.755  | 229584    | POGZ      | NM_001165948_3_+1  |
| Pias3   | 1.880  | -2.988 | 1.065  | 1.006  | 1.260  | 0.473  | 0.736  | -1.827 | -2.127 | 0.290  | 229615    | PIAS3     | NM_001165949_3_+1  |
| Trim45  | 0.528  | 0.711  | -0.741 | -1.933 | -1.646 | -1.967 | -1.267 | -1.701 | -0.203 | -0.580 | 229644    | TRIM45    | NM_001165952_3_+1  |
| Trim45  | -1.270 | -4.981 | -4.387 | -4.978 | -4.209 | -4.738 | -4.281 | -3.255 | -4.960 | -4.967 | 229644    | TRIM45    | NM_001165953_3_+1  |
| Phc3    | 1.075  | 3.249  | 1.528  | 2.400  | 2.635  | 2.650  | 2.420  | 2.199  | 3.036  | 2.083  | 241915    | PHC3      | NM_001165954_3_-1  |
| Phc3    | 3.682  | 3.341  | 3.288  | 3.157  | 3.273  | 3.751  | 3.483  | 3.448  | 3.757  | 4.365  | 241915    | PHC3      | NM_001165955_3_-1  |
| Phc3    | 1.861  | 1.630  | 1.242  | -1.009 | 1.678  | -2.044 | -0.271 | -0.155 | -1.635 | 0.731  | 241915    | PHC3      | NM_001165956_3_-1  |
| Nme9    | -4.981 | -3.315 | -3.199 | -2.843 | -3.988 | -3.602 | -4.313 | -4.073 | -4.981 | -4.981 | 623534    | NME9      | NM_001165957_9_+1  |
| Fndc7   | -0.555 | 0.421  | 3.025  | 1.915  | 1.818  | 2.041  | -1.364 | 0.499  | -2.734 | -1.868 | 320181    | FND7      | NM_001165965_3_-1  |
| Gm5803  | -3.508 | -4.981 | -4.947 | -4.601 | -4.951 | -4.781 | -4.672 | -4.920 | -4.981 | -4.051 | 545091    | HNRNPA1L2 | NM_001165971_15_-1 |
| Dcaf17  | 4.286  | 3.371  | 3.891  | 3.148  | 3.732  | 3.481  | 3.641  | 3.473  | 3.271  | 3.337  | 75763     | DCAF17    | NM_001165980_2_+1  |
| Dcaf17  | 4.080  | 2.871  | 3.605  | 3.063  | 3.742  | 2.688  | 3.746  | 2.671  | 3.539  | 3.123  | 75763     | DCAF17    | NM_001165981_2_+1  |
| Dcaf17  | 0.455  | 0.110  | -0.055 | 0.494  | 0.448  | 0.212  | 0.005  | -0.046 | -0.358 | 0.409  | 75763     | DCAF17    | NM_001165982_2_+1  |
| Ubp2l   | 3.158  | 3.641  | 4.891  | 5.077  | 4.517  | 4.317  | 3.960  | 4.592  | 4.753  | 4.748  | 74383     | NA        | NM_001165983_3_-1  |
| Ubp2l   | 4.438  | 4.558  | 4.825  | 4.770  | 4.894  | 4.906  | 5.077  | 4.805  | 5.508  | 5.472  | 74383     | NA        | NM_001165984_3_-1  |
| Ubp2l   | -1.817 | -0.234 | 1.679  | 1.261  | 0.784  | 0.837  | 0.592  | 0.608  | 1.919  | 1.932  | 74383     | NA        | NM_001165985_3_-1  |
| Ubp2l   | 4.444  | 4.172  | 5.516  | 5.690  | 4.833  | 5.171  | 4.851  | 5.059  | 4.953  | 5.230  | 74383     | NA        | NM_001165986_3_-1  |
| Ubp2l   | -1.160 | -0.555 | 1.166  | 0.615  | 1.202  | 1.117  | 0.703  | 0.703  | 1.344  | 1.698  | 74383     | NA        | NM_001165987_3_-1  |
| Ubp2l   | 4.625  | 4.738  | 5.267  | 5.227  | 5.177  | 5.071  | 5.017  | 4.998  | 4.621  | 4.876  | 74383     | NA        | NM_001165988_3_-1  |
| Ckap5   | 4.762  | 4.910  | 4.936  | 4.721  | 5.682  | 5.160  | 4.985  | 4.765  | 4.446  | 4.713  | 75786     | CKAP5     | NM_001165989_2_+1  |
| Arfrp1  | -3.653 | -3.401 | -3.567 | -1.476 | -4.365 | -3.398 | -4.013 | -4.730 | -3.710 | -4.290 | 76688     | ARFRP1    | NM_001165991_2_-1  |
| Arfrp1  | -3.248 | 1.616  | 1.420  | 2.040  | 0.010  | -1.059 | 1.486  | 0.603  | 1.657  | 0.642  | 76688     | ARFRP1    | NM_001165992_2_-1  |
| Arfrp1  | -2.083 | -4.537 | -2.374 | -2.726 | -0.586 | -0.359 | -1.038 | -4.652 | -1.659 | -4.867 | 76688     | ARFRP1    | NM_001165995_2_-1  |
| Spopl   | 3.349  | 3.061  | 3.789  | 3.617  | 3.590  | 3.648  | 2.923  | 3.283  | 2.919  | 3.206  | 76857     | SPOPL     | NM_001165997_2_-1  |
| Spopl   | -2.145 | 1.152  | -2.225 | -1.724 | -0.854 | -0.654 | 0.182  | -2.570 | -4.683 | -0.701 | 76857     | SPOPL     | NM_001165998_2_-1  |
| Tmem215 | -0.673 | -4.981 | -4.884 | -3.168 | -3.773 | -4.199 | -4.899 | -1.021 | -4.981 | -4.981 | 320500    | TMEM215   | NM_001166009_4_+1  |
| Arfgap2 | 2.176  | 2.021  | 2.370  | 2.299  | 1.993  | 2.333  | 1.457  | 1.855  | 2.527  | 2.861  | 77038     | ARFGAP2   | NM_001166024_2_+1  |
| Slnf14  | -2.362 | -0.447 | -1.817 | 0.192  | -3.818 | 0.490  | -4.121 | -1.032 | -4.981 | -1.892 | 237890    | SLFN14    | NM_001166028_11_-1 |
| Cfap74  | -0.051 | 0.022  | -1.229 | -1.660 | -1.602 | -0.575 | -1.204 | -1.411 | -0.773 | -1.808 | 544678    | CFAP74    | NM_001166029_4_+1  |
| Mylk4   | -2.990 | -4.981 | -3.814 | -3.715 | -4.113 | -4.195 | -3.647 | -4.309 | -3.738 | -3.342 | 238564    | MYLK4     | NM_001166030_13_-1 |
| Mrps2   | -2.326 | 0.357  | -0.557 | 0.707  | -1.406 | -0.331 | -0.073 | -0.130 | -3.905 | 0.180  | 118451    | MRPS2     | NM_001166031_2_+1  |
| Gtf3c4  | -1.839 | -0.449 | -0.169 | -1.400 | -2.189 | -2.589 | -0.843 | -1.886 | -3.835 | 0.346  | 269252    | GTF3C4    | NM_001166033_2_-1  |
| Ccdc152 | -4.981 | -4.981 | -4.981 | -4.981 | -4.981 | -4.981 | -4.981 | -4.981 | -2.792 | -4.342 | 100039139 | CCDC152   | NM_001166063_15_-1 |
| Syde2   | -0.251 | -4.981 | -3.238 | -4.856 | -4.890 | -2.912 | -3.368 | -4.684 | -4.394 | -4.981 | 214804    | SYDE2     | NM_001166064_3_+1  |
| Gcnt4   | -4.981 | -4.981 | -0.407 | -0.347 | -1.768 | -2.188 | -4.561 | -3.133 | -4.981 | -2.553 | 218476    | GCNT4     | NM_001166065_13_+1 |
| Slc4a5  | -1.327 | -2.997 | -3.246 | -1.327 | -4.303 | -4.041 | -3.103 | -4.443 | -4.981 | -4.316 | 232156    | SLC4A5    | NM_001166067_6_+1  |
| Armc8   | 3.485  | 3.336  | 3.652  | 2.986  | 4.137  | 3.810  | 3.930  | 3.284  | 3.153  | 3.254  | 74125     | ARMC8     | NM_001166138_9_-1  |
| Ccdc74a | -2.842 | -4.981 | -4.626 | -2.981 | -4.581 | -1.429 | -2.941 | -3.021 | -3.738 | -2.580 | 72315     | NA        | NM_001166164_16_+1 |
| Argg    | -4.981 | -4.981 | -4.824 | -4.618 | -3.284 | -3.884 | -2.294 | -2.097 | -1.130 | -3.599 | 74008     | ARSG      | NM_001166177_11_+1 |
| Erv3    | -4.981 | -4.981 | -4.968 | -4.819 | -3.751 | -3.565 | -4.954 | -4.979 | -4.981 | -4.981 | 71995     | NA        | NM_001166206_2_-1  |
| Myh15   | -4.981 | -4.981 | -4.600 | -4.692 | -1.002 | -4.295 | -0.821 | -1.116 | -4.981 | -4.981 | 667772    | MYH15     | NM_001166210_16_+1 |
| Fam129c | 4.895  | 3.654  | 2.536  | 2.648  | 2.808  | 2.767  | 2.093  | 3.079  | 0.070  | 0.612  | 100037278 | FAM129C   | NM_001166213_8_+1  |
| Zfp712  | 1.442  | 1.187  | 1.646  | 0.804  | 2.222  | 1.873  | 1.912  | 1.659  | 2.389  | 2.592  | 78251     | ZNF726    | NM_001166218_13_-1 |
| Mgll    | -4.914 | -2.774 | -3.028 | -2.019 | -4.898 | -3.908 | -4.030 | -4.562 | -4.981 | -4.974 | 23945     | MGLL      | NM_001166249_6_+1  |
| Mgll    | -2.922 | -4.981 | -1.241 | -3.345 | -4.671 | -4.971 | -4.570 | -4.730 | -2.735 | -4.473 | 23945     | MGLL      | NM_001166250_6_+1  |

|               |        |        |        |        |        |        |        |        |        |        |        |           |                     |
|---------------|--------|--------|--------|--------|--------|--------|--------|--------|--------|--------|--------|-----------|---------------------|
| Mgll          | -3.819 | 0.623  | 0.574  | 2.600  | -1.427 | 0.527  | -2.312 | -0.344 | -2.242 | -1.017 | 23945  | MGLL      | NM_001166251_6_+_1  |
| Cspg5         | -4.203 | -3.254 | -4.932 | -4.628 | -4.706 | -4.835 | -4.965 | -4.014 | -4.981 | -4.981 | 29873  | CSPG5     | NM_001166273_9_+_1  |
| Serpina11     | -4.981 | -4.981 | -4.964 | -4.895 | -2.865 | -3.198 | -2.748 | -3.733 | -4.081 | -4.981 | 380780 | SERPINA11 | NM_001166350_12_+_1 |
| 6030458C11Rik | -1.715 | 1.894  | 1.576  | 1.660  | 1.265  | 1.942  | 0.593  | 1.207  | -1.038 | 0.490  | 77877  | C5orf22   | NM_001166360_15_+_1 |
| Fam219b       | 2.907  | 1.938  | 3.325  | 1.910  | 3.574  | 2.950  | 3.758  | 2.106  | 4.004  | 2.589  | 78323  | FAM219B   | NM_001166364_9_+_1  |
| Fam122b       | 1.937  | 1.269  | 1.046  | 1.873  | 1.013  | 1.507  | 1.356  | 1.414  | 2.452  | 2.398  | 78755  | FAM122B   | NM_001166365_X_+_1  |
| Fkbp2         | 7.302  | 7.040  | 5.573  | 5.738  | 4.506  | 4.570  | 5.555  | 5.952  | 4.755  | 4.802  | 14227  | FKBP2     | NM_001166368_19_+_1 |
| Trmt112       | 7.861  | 7.796  | 6.761  | 6.587  | 7.417  | 7.320  | 7.464  | 7.111  | 6.522  | 6.075  | 67674  | TRMT112   | NM_001166370_19_+_1 |
| Zfp638        | 3.577  | 3.483  | 4.335  | 4.148  | 4.169  | 4.377  | 3.506  | 3.865  | 3.526  | 3.887  | 18139  | ZNF638    | NM_001166371_6_+_1  |
| March1        | -4.582 | -4.438 | -4.759 | -4.905 | -4.939 | -4.969 | -4.802 | -4.949 | -4.748 | -4.905 | 72925  | MARCH1    | NM_001166372_8_+_1  |
| March1        | 5.347  | 4.565  | 7.451  | 7.374  | 6.626  | 6.864  | 6.701  | 6.606  | 6.701  | 7.259  | 72925  | MARCH1    | NM_001166375_8_+_1  |
| Ms4a6c        | 4.154  | 4.508  | 4.507  | 4.194  | 6.207  | 5.716  | 6.914  | 6.665  | 6.864  | 6.212  | 73656  | NA        | NM_001166376_19_+_1 |
| Armxc1        | -4.738 | -4.393 | -4.917 | -4.926 | -4.950 | -4.605 | -3.761 | -3.180 | -4.974 | -4.963 | 78248  | ARMCX1    | NM_001166377_X_+_1  |
| Armxc1        | -1.440 | -4.507 | -4.632 | -1.842 | -3.270 | -4.067 | -3.371 | -3.960 | -4.026 | -2.888 | 78248  | ARMCX1    | NM_001166378_X_+_1  |
| Armxc1        | -4.217 | -4.763 | -3.537 | -4.819 | -4.883 | -4.967 | -4.799 | -4.972 | -4.915 | -4.827 | 78248  | ARMCX1    | NM_001166379_X_+_1  |
| Armxc1        | -4.059 | -4.729 | -4.947 | -4.789 | -4.853 | -4.963 | -4.812 | -4.947 | -4.887 | -4.757 | 78248  | ARMCX1    | NM_001166380_X_+_1  |
| Rad52         | 3.156  | 4.032  | 2.377  | 2.762  | 1.634  | 2.248  | 1.260  | 2.553  | 2.229  | 2.103  | 19365  | RAD52     | NM_001166381_6_+_1  |
| Rad52         | -4.345 | -1.531 | -4.395 | -3.588 | -4.669 | -4.853 | -3.068 | -2.513 | -1.814 | -0.269 | 19365  | RAD52     | NM_001166382_6_+_1  |
| Rad52         | 0.677  | 0.869  | -0.454 | 0.218  | -0.784 | -0.618 | -0.288 | -0.337 | 0.743  | 0.677  | 19365  | RAD52     | NM_001166383_6_+_1  |
| Sp4           | 2.707  | 2.621  | -1.107 | 0.618  | -0.025 | 0.267  | 1.101  | -1.474 | -2.575 | -0.486 | 20688  | SP4       | NM_001166385_12_+_1 |
| Ptp4a3        | 1.542  | -3.820 | -0.602 | -0.316 | 3.027  | 0.539  | 2.268  | -1.006 | -4.467 | -0.351 | 19245  | PTP4A3    | NM_001166388_15_+_1 |
| Ptp4a3        | 5.393  | 5.829  | 5.116  | 4.838  | 5.480  | 5.817  | 5.953  | 5.835  | 5.139  | 4.847  | 19245  | PTP4A3    | NM_001166389_15_+_1 |
| Ptp4a3        | -4.981 | -4.981 | -4.972 | -4.972 | -4.979 | -4.979 | -4.830 | -4.965 | -4.981 | -4.981 | 19245  | PTP4A3    | NM_001166390_15_+_1 |
| F13a1         | -4.981 | -1.853 | 0.324  | -0.887 | -3.790 | 0.310  | 2.032  | 1.944  | 6.645  | 6.662  | 74145  | F13A1     | NM_001166391_13_+_1 |
| 4931428F04Rik | -2.111 | -1.010 | -1.062 | -1.191 | 0.417  | -0.203 | 0.180  | -0.157 | 0.154  | -2.511 | 74356  | KIAA0895L | NM_001166394_8_+_1  |
| Armxc2        | 0.171  | -0.300 | 0.986  | -2.182 | -0.259 | -1.082 | -0.583 | -1.359 | -3.170 | -0.043 | 67416  | ARMCX2    | NM_001166397_X_+_1  |
| Armxc2        | 4.392  | 4.086  | 2.747  | 3.467  | 2.939  | 2.787  | 2.107  | 2.477  | 0.387  | 1.351  | 67416  | ARMCX2    | NM_001166398_X_+_1  |
| Rab3a         | 1.763  | 1.985  | 0.752  | 1.532  | 1.228  | 0.833  | 0.692  | 0.137  | 2.511  | 1.500  | 19339  | RAB3A     | NM_001166399_8_+_1  |
| Tnfaip3       | 5.749  | 5.242  | 5.372  | 5.893  | 6.215  | 6.134  | 6.141  | 6.193  | 3.513  | 4.319  | 21929  | TNFAIP3   | NM_001166402_10_+_1 |
| Kif20a        | -4.053 | -3.503 | -1.488 | -1.916 | -1.338 | -2.743 | -2.449 | -4.664 | -4.488 | -4.268 | 19348  | KIF20A    | NM_001166406_18_+_1 |
| Kif20a        | -0.324 | -1.241 | -0.785 | -0.405 | -1.559 | -2.050 | -1.832 | -2.110 | -0.674 | 0.412  | 19348  | KIF20A    | NM_001166407_18_+_1 |
| Rai14         | -1.034 | -2.217 | -2.248 | -2.550 | -1.804 | -2.026 | 1.004  | 1.017  | -0.182 | 1.750  | 75646  | RAI14     | NM_001166408_15_+_1 |
| Rbm3          | 6.633  | 6.295  | 6.575  | 6.148  | 6.096  | 5.864  | 6.093  | 5.753  | 5.553  | 4.621  | 19652  | RBM3      | NM_001166409_X_+_1  |
| Rbm3          | 8.372  | 8.146  | 7.922  | 7.729  | 8.063  | 7.801  | 7.780  | 7.513  | 7.236  | 6.785  | 19652  | RBM3      | NM_001166410_X_+_1  |
| Rbm3          | 7.108  | 6.905  | 6.517  | 6.469  | 6.266  | 5.972  | 6.418  | 5.628  | 5.613  | 5.367  | 19652  | RBM3      | NM_001166411_X_+_1  |
| Arhgef25      | -3.459 | -1.079 | -2.077 | -1.771 | -1.022 | -2.065 | -3.450 | -1.367 | -4.033 | -2.842 | 52666  | ARHGEF25  | NM_001166413_10_+_1 |
| Rfx3          | 1.985  | 2.047  | 2.577  | 1.765  | 1.288  | 2.011  | 2.061  | 1.424  | 1.734  | 2.501  | 19726  | RF3       | NM_001166414_19_+_1 |
| Med23         | 2.466  | 1.632  | 1.108  | 1.466  | 1.827  | 1.323  | 0.784  | 0.418  | 0.327  | 0.636  | 70208  | MED23     | NM_001166416_10_+_1 |
| Hnnpf         | 6.405  | 6.633  | 6.308  | 6.367  | 6.644  | 6.523  | 6.400  | 6.533  | 6.580  | 6.443  | 98758  | HNRNPF    | NM_001166427_6_+_1  |
| Hnnpf         | 3.396  | 3.971  | 3.930  | 3.974  | 3.913  | 4.443  | 3.666  | 3.830  | 3.777  | 3.840  | 98758  | HNRNPF    | NM_001166428_6_+_1  |
| Hnnpf         | 6.597  | 6.189  | 6.412  | 6.472  | 6.406  | 6.508  | 6.677  | 6.857  | 6.347  | 6.554  | 98758  | HNRNPF    | NM_001166429_6_+_1  |
| Hnnpf         | 6.077  | 6.051  | 7.209  | 7.288  | 6.658  | 6.518  | 6.988  | 7.369  | 8.217  | 8.014  | 98758  | HNRNPF    | NM_001166430_6_+_1  |
| Hnnpf         | 2.330  | 1.093  | 1.512  | 2.438  | 1.681  | 2.375  | 2.287  | 1.016  | 2.438  | 1.679  | 98758  | HNRNPF    | NM_001166431_6_+_1  |
| Hnnpf         | 6.416  | 6.579  | 6.285  | 6.454  | 6.598  | 6.556  | 6.262  | 5.910  | 4.143  | 4.049  | 98758  | HNRNPF    | NM_001166432_6_+_1  |
| Tbc1d25       | 1.621  | 2.331  | 2.019  | 2.654  | 2.680  | 2.683  | 1.925  | 3.157  | 2.451  | 2.493  | 209815 | TBC1D25   | NM_001166437_X_+_1  |
| Slc25a14      | -4.727 | -4.500 | -4.556 | -3.612 | -3.926 | -3.989 | -4.884 | -4.926 | -4.622 | -4.545 | 20523  | SLC25A14  | NM_001166440_X_+_1  |
| Pls3          | 4.705  | 4.110  | 2.319  | -0.847 | 2.065  | -1.166 | 2.037  | -1.435 | 1.705  | -1.379 | 102866 | PLS3      | NM_001166453_X_+_1  |
| Pls3          | 2.559  | -1.044 | -0.750 | -1.460 | -1.039 | -2.299 | -2.864 | -1.607 | -3.988 | -2.459 | 102866 | PLS3      | NM_001166454_X_+_1  |
| Slc38a1       | 4.357  | 5.187  | 2.997  | 3.818  | 3.844  | 4.178  | 4.028  | 3.846  | 3.244  | 3.485  | 105727 | SLC38A1   | NM_001166456_15_+_1 |
| Brc3          | 3.919  | 3.850  | 3.668  | 3.463  | 3.318  | 3.146  | 3.342  | 3.254  | 3.292  | 3.597  | 210766 | BRCC3     | NM_001166457_X_+_1  |
| Slc38a1       | 6.344  | 6.674  | 5.152  | 5.389  | 6.082  | 5.578  | 5.797  | 5.483  | 5.873  | 5.616  | 105727 | SLC38A1   | NM_001166458_15_+_1 |
| Brc3          | 6.241  | 6.412  | 5.699  | 5.809  | 5.164  | 5.094  | 5.109  | 5.003  | 3.783  | 3.787  | 210766 | BRCC3     | NM_001166459_X_+_1  |
| Spock1        | -4.981 | -4.981 | -4.444 | -2.355 | -4.981 | -4.981 | -4.978 | -4.928 | -4.981 | -4.981 | 20745  | SPOCK1    | NM_001166463_13_+_1 |
| Spock1        | -4.981 | -4.981 | -4.920 | -4.476 | -4.976 | -4.902 | -4.968 | -4.959 | -4.981 | -4.981 | 20745  | SPOCK1    | NM_001166464_13_+_1 |
| Spock1        | -4.981 | -4.981 | -4.936 | -4.238 | -4.975 | -4.884 | -4.967 | -4.956 | -4.981 | -4.981 | 20745  | SPOCK1    | NM_001166465_13_+_1 |
| Spock1        | -4.981 | -4.981 | -4.601 | -4.341 | -4.981 | -4.981 | -4.978 | -4.937 | -4.981 | -4.981 | 20745  | SPOCK1    | NM_001166466_13_+_1 |
| Vmac          | 3.623  | 3.629  | 0.971  | 1.778  | 1.497  | 1.590  | 2.023  | 1.980  | 2.235  | 1.717  | 106639 | VMAC      | NM_001166474_17_+_1 |
| Hmga1-rs1     | 3.655  | 3.210  | 3.319  | 3.576  | 3.325  | 3.045  | 3.214  | 3.699  | 3.096  | 3.140  | 111241 | HMGA1     | NM_001166476_17_+_1 |
| Hmga1-rs1     | 4.319  | 4.073  | 4.295  | 4.502  | 4.160  | 4.110  | 4.835  | 4.392  | 4.010  | 3.403  | 111241 | HMGA1     | NM_001166477_17_+_1 |
| Ssr4          | 7.755  | 7.565  | 6.565  | 6.473  | 5.815  | 6.101  | 6.393  | 6.724  | 5.777  | 5.513  | 20832  | SSR4      | NM_001166480_X_+_1  |
| Mthfsd        | 4.438  | 4.449  | 3.357  | 3.630  | 3.286  | 3.629  | 2.937  | 3.196  | 2.880  | 3.008  | 234814 | MTHFSD    | NM_001166482_8_+_1  |
| Rasgrp3       | -1.889 | -2.156 | 0.858  | 1.769  | -0.261 | 0.789  | 0.283  | -1.126 | -1.985 | -1.555 | 240168 | RASGRP3   | NM_001166493_17_+_1 |
| Zpbp2         | -0.475 | -0.706 | -4.867 | -2.964 | -4.884 | -4.112 | -3.109 | -2.163 | -4.956 | -4.981 | 69376  | ZPBP2     | NM_001166494_11_+_1 |
| Zpbp2         | -2.698 | 0.485  | -3.390 | -4.966 | -4.030 | -2.672 | -4.960 | -4.269 | -1.579 | -4.915 | 69376  | ZPBP2     | NM_001166495_11_+_1 |
| Zfp983        | 3.822  | 3.960  | 2.579  | 2.660  | 3.346  | 3.359  | 3.114  | 2.817  | 2.884  | 3.499  | 73229  | NA        | NM_001166497_17_+_1 |
| Dennd1b       | 4.555  | 4.650  | 6.664  | 6.373  | 5.125  | 5.269  | 4.921  | 4.869  | 4.559  | 4.803  | 329260 | DENND1B   | NM_001166501_1_+_1  |
| Slc39a11      | 2.575  | 0.266  | 1.538  | 1.033  | 1.038  | 0.122  | 1.548  | 0.965  | 1.657  | 1.785  | 69806  | SLC39A11  | NM_001166503_11_+_1 |
| Sec14l1       | 2.547  | 1.976  | 4.320  | 4.523  | 3.467  | 3.030  | 4.840  | 4.999  | 6.442  | 6.320  | 74136  | SEC14L1   | NM_001166506_11_+_1 |
| Sec14l1       | -4.048 | -4.264 | 0.138  | -0.904 | -2.246 | -4.524 | -0.506 | -1.038 | -0.272 | -1.466 | 74136  | SEC14L1   | NM_001166507_11_+_1 |
| Sfmbt1        | 3.246  | 2.972  | 3.715  | 3.929  | 3.953  | 4.734  | 2.691  | 1.813  | 1.934  | -0.422 | 54650  | SFMBT1    | NM_001166531_14_+_1 |
| Sfmbt1        | 2.014  | 2.402  | 3.975  | 3.717  | 3.754  | 3.478  | 2.171  | 2.526  | 0.679  | 1.887  | 54650  | SFMBT1    | NM_001166532_14_+_1 |
| Hmga1         | -1.270 | 0.342  | 0.030  | 0.980  | -0.644 | -1.246 | 0.116  | -0.944 | 0.699  | 0.245  | 15361  | HMGA1     | NM_001166535_17_+_1 |
| Hmga1         | -4.111 | -0.317 | -2.724 | -3.663 | -2.583 | -3.390 | -1.889 | -3.543 | -0.074 | -2.969 | 15361  | HMGA1     | NM_001166536_17_+_1 |
| Hmga1         | -0.914 | 0.509  | 1.166  | 1.765  | 1.044  | 1.811  | 1.323  | 1.374  | 2.316  | 1.261  | 15361  | HMGA1     | NM_001166537_17_+_1 |







|               |        |        |        |        |        |        |        |        |        |        |        |          |                    |                    |
|---------------|--------|--------|--------|--------|--------|--------|--------|--------|--------|--------|--------|----------|--------------------|--------------------|
| A830010M20Rik | Cdad1  | 2.860  | 2.594  | 2.395  | 2.626  | 2.748  | 2.676  | 2.233  | 2.509  | 2.567  | 2.746  | 71891    | CDADC1             | NM_001168536_14_-1 |
|               | Cdad1  | -4.763 | -0.177 | -2.108 | -1.651 | -2.456 | -1.964 | -2.011 | -0.839 | -0.638 | -0.490 | 71891    | CDADC1             | NM_001168537_14_-1 |
|               | Cdad1  | -1.072 | 0.102  | -1.030 | -2.001 | -2.063 | -1.765 | -1.096 | -2.169 | 0.184  | 0.789  | 71891    | CDADC1             | NM_001168538_14_-1 |
|               | Tsku   | -4.981 | -4.981 | -4.960 | -4.960 | -4.713 | -4.491 | -3.664 | -4.485 | -4.981 | -4.981 | 244152   | TSKU               | NM_001168539_7_-1  |
|               | Tsku   | -4.981 | -4.981 | -4.957 | -4.957 | -4.953 | -4.943 | -4.780 | -4.109 | -4.981 | -4.981 | 244152   | TSKU               | NM_001168540_7_-1  |
|               | Tsku   | -4.981 | -4.981 | -4.981 | -4.981 | -4.978 | -3.945 | -4.942 | -4.979 | -4.981 | -4.981 | 244152   | TSKU               | NM_001168541_7_-1  |
|               | Zfp446 | 0.095  | 1.393  | -3.311 | -4.341 | -4.319 | -2.615 | -3.789 | -4.773 | -4.349 | -4.977 | 231570   | KIAA1107           | NM_001168557_5_+1  |
|               | Zfp446 | -1.249 | 1.069  | -0.833 | -1.010 | 0.073  | -1.175 | -1.632 | -2.284 | -0.959 | -2.371 | 269870   | ZNF446             | NM_001168561_7_+1  |
|               | Zfp446 | -4.625 | -0.282 | -0.567 | -2.005 | 0.000  | -0.137 | 0.085  | 0.267  | 0.718  | 1.232  | 269870   | ZNF446             | NM_001168562_7_+1  |
|               | Ctps2  | 5.428  | 5.515  | 3.695  | 3.983  | 4.475  | 4.100  | 4.702  | 5.138  | 4.742  | 4.864  | 55936    | CTPS2              | NM_001168568_X_+1  |
|               | Ctps2  | -3.478 | 0.064  | -3.610 | -4.667 | -0.933 | -1.572 | -0.880 | 0.162  | 2.273  | 2.908  | 55936    | CTPS2              | NM_001168569_X_+1  |
|               | Ctps2  | -4.824 | -4.647 | -4.630 | -3.718 | -4.907 | -4.341 | -3.465 | -4.784 | -4.750 | -4.939 | 55936    | CTPS2              | NM_001168571_X_+1  |
|               | Brsk1  | -4.981 | -4.981 | -3.083 | -4.370 | -3.161 | -3.507 | -3.093 | -4.213 | -4.394 | -3.210 | 381979   | BRSK1              | NM_001168572_7_+1  |
|               | Nat2   | 3.197  | 4.064  | 3.253  | 3.266  | 2.524  | 2.756  | 2.852  | 2.988  | 2.648  | 3.281  | 17961    | NAT1               | NM_001168577_8_+1  |
|               | Tceal8 | 0.149  | 0.655  | -4.849 | -4.961 | -3.176 | -4.989 | -3.776 | -2.092 | -2.507 | -0.739 | 66684    | TCEAL8             | NM_001168578_X_-1  |
|               | Lonp2  | 1.742  | 2.075  | -3.548 | -0.880 | -4.571 | -1.005 | 1.343  | -3.076 | -0.353 | 1.009  | 66887    | LONP2              | NM_001168591_8_+1  |
|               | Comm6  | 2.425  | 3.085  | 1.528  | 1.840  | 1.148  | 1.552  | 1.454  | 0.879  | 0.077  | 1.231  | 66200    | NA                 | NM_001168592_14_-1 |
|               | Gnl3l  | -1.528 | 1.196  | 0.358  | 1.207  | 0.632  | -0.439 | 1.477  | -2.247 | 0.722  | 0.515  | 237107   | GNL3L              | NM_001168600_X_-1  |
|               | Tifab  | 7.115  | 6.949  | 8.499  | 8.729  | 7.010  | 7.501  | 7.806  | 8.283  | 8.908  | 9.128  | 212937   | TIFAB              | NM_001168615_13_-1 |
|               | Enpp5  | 2.139  | 2.394  | 2.446  | 2.057  | 0.341  | 1.054  | 0.195  | -0.154 | -0.291 | -3.005 | 83965    | ENPP5              | NM_001168620_17_+1 |
| Znrf1         | 2.744  | 2.155  | 0.477  | 1.208  | 1.441  | 1.292  | 1.065  | 0.838  | 2.330  | 2.029  | 170737 | ZNRF1    | NM_001168621_8_+1  |                    |
| Znrf1         | -0.948 | -4.723 | -0.996 | -1.565 | -3.897 | -3.368 | -0.511 | -0.669 | 1.370  | 0.242  | 170737 | ZNRF1    | NM_001168622_8_+1  |                    |
| Znrf1         | -4.759 | -4.766 | -2.659 | -4.626 | -1.992 | -2.568 | -2.867 | -3.691 | -1.355 | -1.360 | 170737 | ZNRF1    | NM_001168623_8_+1  |                    |
| Slc6a18       | -4.981 | -4.981 | -4.362 | -4.937 | -4.851 | -4.954 | -4.899 | -4.898 | -4.981 | -4.981 | 22598  | SLC6A18  | NM_001168643_13_-1 |                    |
| Slc6a18       | -4.981 | -4.981 | -4.490 | -4.954 | -4.886 | -4.965 | -4.928 | -4.921 | -4.981 | -4.981 | 22598  | SLC6A18  | NM_001168644_13_-1 |                    |
| Slc6a18       | -4.981 | -4.981 | -3.331 | -4.774 | -4.284 | -4.825 | -4.448 | -4.519 | -4.981 | -4.981 | 22598  | SLC6A18  | NM_001168645_13_-1 |                    |
| Slc6a18       | -4.981 | -4.981 | -4.763 | -4.974 | -4.955 | -4.978 | -4.969 | -4.967 | -4.981 | -4.981 | 22598  | SLC6A18  | NM_001168646_13_-1 |                    |
| Lrch4         | 5.771  | 5.913  | 6.207  | 6.440  | 7.093  | 7.034  | 7.174  | 7.067  | 7.865  | 7.664  | 231798 | LRCH4    | NM_001168652_5_+1  |                    |
| Socs2         | -4.120 | -4.159 | -0.172 | 0.101  | -1.015 | 0.030  | -1.839 | -2.677 | -4.981 | -4.826 | 216233 | SOC52    | NM_001168655_10_-1 |                    |
| Socs2         | -3.748 | -3.794 | -1.533 | -2.130 | 0.415  | -0.162 | -1.942 | -4.491 | -4.981 | -4.693 | 216233 | SOC52    | NM_001168656_10_-1 |                    |
| Socs2         | 1.032  | -0.916 | 3.183  | 3.272  | 2.016  | 2.334  | 1.360  | 1.112  | -4.981 | -3.011 | 216233 | SOC52    | NM_001168657_10_-1 |                    |
| Ccdc127       | 1.064  | 0.901  | 0.794  | 0.605  | 0.462  | 0.114  | 1.024  | 0.712  | 2.740  | 2.445  | 67433  | CCDC127  | NM_001168658_13_+1 |                    |
| Ccdc127       | 5.344  | 5.179  | 4.978  | 4.478  | 4.456  | 4.460  | 4.665  | 4.623  | 4.938  | 4.899  | 67433  | CCDC127  | NM_001168659_13_+1 |                    |
| Apol9b        | -4.981 | -4.981 | -4.910 | -4.910 | -4.892 | -4.903 | -4.851 | -4.824 | -4.849 | -4.645 | 71898  | NA       | NM_001168660_15_+1 |                    |
| Fam114a2      | 5.391  | 4.401  | 4.319  | 3.710  | 3.911  | 3.323  | 3.790  | 3.120  | 4.010  | 4.486  | 67726  | FAM114A2 | NM_001168667_11_-1 |                    |
| Fam114a2      | 2.173  | 2.115  | 1.539  | 0.441  | 0.687  | 0.993  | 1.138  | -0.188 | 1.117  | 0.689  | 67726  | FAM114A2 | NM_001168668_11_-1 |                    |
| Gtse1         | -3.738 | -3.810 | -1.174 | -1.614 | 1.385  | 0.380  | -0.133 | -1.360 | -0.231 | -0.421 | 29870  | GTSE1    | NM_001168672_15_+1 |                    |
| Tspan8        | -2.455 | -1.243 | -4.896 | -2.691 | -4.391 | -4.202 | -2.813 | -2.181 | -2.340 | -1.843 | 216350 | TSPAN8   | NM_001168679_10_+1 |                    |
| Tspan8        | -4.482 | -0.180 | -4.991 | -0.580 | -2.987 | 0.640  | -3.442 | -0.070 | -4.736 | -1.637 | 216350 | TSPAN8   | NM_001168680_10_+1 |                    |
| Tmcc3         | 2.059  | -0.309 | -3.242 | 0.535  | 1.679  | 2.260  | 1.343  | 0.033  | -4.119 | -4.474 | 319880 | TMCC3    | NM_001168684_10_+1 |                    |
| Endou         | -4.981 | -4.981 | -4.107 | -4.619 | -4.883 | -3.113 | -2.666 | -2.505 | -3.414 | -4.981 | 19011  | ENDOU    | NM_001168693_15_-1 |                    |
| B3gnt2        | 1.505  | 2.212  | 1.852  | 2.027  | 0.908  | 1.273  | 1.513  | 1.512  | 2.775  | 3.588  | 53625  | B3GNT2   | NM_001169114_11_-1 |                    |
| Papd7         | 1.498  | 1.231  | 1.526  | 0.540  | 0.765  | 1.071  | 1.596  | 1.570  | 2.105  | 2.770  | 210106 | PAPD7    | NM_001169131_13_-1 |                    |
| Cd300lf       | 7.213  | 7.107  | 2.303  | 3.737  | 6.904  | 7.501  | 5.427  | 4.958  | 4.873  | 4.139  | 246746 | CD300LF  | NM_001169153_11_-1 |                    |
| Ube2h         | -0.906 | 1.516  | 1.027  | -0.052 | 0.101  | 1.308  | 0.750  | 0.277  | 1.528  | 1.724  | 22214  | UBE2H    | NM_001169576_6_-1  |                    |
| Ube2h         | 2.872  | 1.012  | -4.298 | -2.606 | -4.318 | -4.801 | -0.935 | -1.805 | 2.903  | 1.614  | 22214  | UBE2H    | NM_001169577_6_-1  |                    |
| Clec4a2       | -0.113 | -2.185 | 0.748  | 1.324  | 5.724  | 6.447  | 5.197  | 5.591  | 4.105  | 4.151  | 26888  | CLEC4A   | NM_001170332_6_+1  |                    |
| Clec4a2       | -2.071 | -1.408 | 0.274  | 0.417  | 3.879  | 4.802  | 4.165  | 5.029  | 4.860  | 5.414  | 26888  | CLEC4A   | NM_001170333_6_+1  |                    |
| Mlf2          | 7.659  | 7.594  | 7.419  | 7.794  | 7.317  | 7.463  | 7.227  | 7.373  | 7.223  | 7.209  | 30853  | MLF2     | NM_001170341_6_+1  |                    |
| Cd163         | 1.213  | 0.803  | -0.469 | -1.177 | 0.606  | -0.608 | 1.646  | 2.800  | 1.113  | 1.110  | 93671  | CD163    | NM_001170395_6_+1  |                    |
| Tmem229b      | 7.775  | 7.896  | 5.262  | 5.198  | 4.811  | 4.865  | 4.879  | 4.455  | 5.054  | 4.926  | 268567 | TMEM229B | NM_001170401_12_-1 |                    |
| Slc35b3       | 1.284  | 1.549  | 1.341  | 1.963  | -0.880 | 0.044  | 0.621  | -0.536 | 1.239  | 1.231  | 108652 | SLC35B3  | NM_001170430_13_-1 |                    |
| Slc35b3       | -1.260 | -0.697 | 0.106  | -1.369 | -1.097 | -2.157 | -1.775 | -0.045 | -1.188 | -0.904 | 108652 | SLC35B3  | NM_001170431_13_-1 |                    |
| Ppfibp1       | 0.159  | -2.133 | -0.314 | 0.586  | -1.663 | 1.021  | -0.407 | -1.442 | -4.196 | -1.286 | 67533  | PPFIBP1  | NM_001170433_6_+1  |                    |
| Tada2b        | 2.932  | 2.235  | 2.977  | 3.117  | 2.962  | 2.788  | 3.195  | 3.205  | 4.430  | 4.549  | 231151 | TADA2B   | NM_001170454_5_-1  |                    |
| Borcs5        | -2.251 | -4.079 | -4.400 | -4.754 | -0.655 | -4.836 | -3.488 | -4.707 | -4.296 | -4.717 | 67774  | BORCS5   | NM_001170479_6_+1  |                    |
| Arpc4         | -2.634 | -1.598 | -2.954 | -2.353 | -2.179 | -2.896 | -2.007 | -1.518 | -0.502 | -0.895 | 68089  | ARPC4    | NM_001170485_6_+1  |                    |
| Arpc4         | 0.057  | -0.798 | 0.422  | 0.560  | 0.825  | -0.152 | 0.723  | 0.251  | 2.341  | 2.470  | 68089  | ARPC4    | NM_001170486_6_+1  |                    |
| Tprkb         | 1.817  | 2.530  | 1.149  | 1.463  | -0.010 | 1.168  | 0.797  | 0.900  | 0.432  | 0.324  | 69786  | TPRKB    | NM_001170488_6_+1  |                    |
| Aplf          | -0.381 | 1.546  | 1.712  | 1.795  | 1.506  | 1.231  | 0.509  | 0.881  | 0.640  | 1.206  | 72103  | APLF     | NM_001170489_6_-1  |                    |
| Mef2c         | 7.967  | 8.280  | 5.230  | 5.938  | 6.878  | 7.284  | 6.528  | 7.062  | 6.304  | 6.923  | 17260  | MEF2C    | NM_001170537_13_+1 |                    |
| Btf3          | 9.033  | 8.826  | 9.148  | 8.996  | 8.791  | 8.743  | 8.729  | 8.552  | 7.879  | 7.619  | 218490 | BTF3     | NM_001170540_13_-1 |                    |
| Krit1         | 1.946  | 3.553  | 2.515  | 3.321  | 1.866  | 3.208  | 2.368  | 3.273  | 1.620  | 3.698  | 79264  | KRIT1    | NM_001170552_5_+1  |                    |
| Prkag2        | 4.149  | 4.842  | 1.560  | 1.508  | 2.364  | 1.222  | 1.477  | 0.543  | 0.839  | 1.560  | 108099 | PRKAG2   | NM_001170555_5_-1  |                    |
| Prkag2        | 5.547  | 5.455  | 3.355  | 2.451  | 2.617  | 1.627  | 2.844  | 0.855  | 0.241  | -4.227 | 108099 | PRKAG2   | NM_001170556_5_-1  |                    |
| Sbf1          | 2.993  | 2.483  | 5.570  | 5.539  | 5.522  | 5.010  | 4.961  | 4.292  | 5.681  | 5.585  | 77980  | SBF1     | NM_001170561_15_-1 |                    |
| Depdc5        | 1.995  | 1.020  | 1.688  | 1.859  | 2.964  | 1.831  | 2.059  | 1.267  | 3.200  | 3.001  | 277854 | DEPDC5   | NM_001170567_5_+1  |                    |
| Nfu1          | 2.779  | 1.567  | 3.005  | 0.994  | 3.198  | 0.747  | 2.894  | 0.908  | 2.275  | 0.569  | 56748  | NFU1     | NM_001170591_6_+1  |                    |
| Fcamr         | -4.812 | -4.722 | -4.968 | -4.921 | -4.981 | -4.980 | -4.973 | -4.979 | -4.981 | -4.981 | 64435  | FCAMR    | NM_001170632_1_+1  |                    |
| Rufy4         | -2.954 | -3.629 | -4.801 | -4.713 | -4.864 | -4.788 | -4.151 | -3.289 | -4.684 | -4.638 | 435626 | RUFY4    | NM_001170641_1_+1  |                    |
| Rnf144b       | -1.208 | -0.    |        |        |        |        |        |        |        |        |        |          |                    |                    |

|          |        |        |        |        |        |        |        |        |        |        |           |         |                    |
|----------|--------|--------|--------|--------|--------|--------|--------|--------|--------|--------|-----------|---------|--------------------|
| Dthd1    | -4.981 | -4.981 | -3.587 | -3.252 | 1.416  | 1.123  | 0.071  | -1.993 | -3.750 | -4.227 | 100322896 | DTHD1   | NM_001170705_5_+1  |
| Asb8     | 4.537  | 4.073  | 4.143  | 4.127  | 4.116  | 4.200  | 3.880  | 4.148  | 4.647  | 4.469  | 78541     | ASB8    | NM_001170710_15_-1 |
| Asb8     | -1.780 | -1.171 | -0.658 | 0.575  | -1.780 | -1.276 | -0.065 | -0.478 | 0.985  | 0.788  | 78541     | ASB8    | NM_001170711_15_-1 |
| Wdr59    | 1.792  | 1.688  | 0.998  | 0.892  | 1.115  | 0.864  | 0.373  | 0.425  | 1.219  | 1.886  | 319481    | WDR59   | NM_001170742_8_-1  |
| Wdr59    | -1.520 | -1.280 | -2.564 | -1.486 | -2.516 | -2.637 | -2.519 | -3.880 | -3.935 | -4.447 | 319481    | WDR59   | NM_001170743_8_-1  |
| Ctbp2    | -4.981 | -4.981 | -4.957 | -4.957 | -4.981 | -4.981 | -3.026 | -4.946 | -2.961 | -2.079 | 13017     | CTBP2   | NM_001170744_7_-1  |
| Magi2    | 1.631  | 0.788  | -1.744 | -1.848 | -0.470 | -0.132 | -0.478 | -0.068 | -0.119 | 0.255  | 50791     | MAGI2   | NM_001170745_5_+1  |
| Magi2    | -3.405 | -3.097 | -4.397 | -4.584 | -4.568 | -4.828 | -4.434 | -4.706 | -3.995 | -4.292 | 50791     | MAGI2   | NM_001170746_5_+1  |
| Asb14    | -4.844 | -4.764 | -4.787 | -4.963 | -4.966 | -4.966 | -4.063 | -4.669 | -2.150 | -3.295 | 142687    | ASB14   | NM_001170748_14_+1 |
| Mthfd11  | -4.981 | -4.981 | -4.271 | -4.920 | -4.981 | -4.981 | -4.925 | -4.195 | -4.981 | -4.981 | 270685    | MTHFD11 | NM_001170785_10_+1 |
| Mthfd11  | 1.033  | 2.517  | 1.543  | 1.418  | 1.604  | 0.928  | 1.920  | 0.205  | 1.843  | 2.185  | 270685    | MTHFD11 | NM_001170786_10_+1 |
| Lrrc36   | -4.981 | -4.981 | -4.961 | -3.175 | -4.979 | -4.979 | -4.916 | -4.947 | -4.839 | -4.960 | 270091    | LRRC36  | NM_001170788_8_+1  |
| Lrrc36   | -4.981 | -4.981 | -4.560 | -3.758 | -4.898 | -4.364 | -4.750 | -4.246 | -2.949 | -3.287 | 270091    | LRRC36  | NM_001170789_8_+1  |
| Ipcef1   | -3.668 | -0.582 | 3.508  | 2.920  | 0.509  | -0.301 | 1.918  | 2.160  | 3.363  | 3.056  | 320495    | IPCEF1  | NM_001170800_10_-1 |
| Ipcef1   | -4.981 | -4.626 | 1.305  | 0.189  | -2.155 | -3.365 | -0.775 | 0.874  | 1.027  | 0.038  | 320495    | IPCEF1  | NM_001170801_10_-1 |
| Ipcef1   | -4.981 | -3.136 | -3.301 | -1.656 | -2.177 | -4.121 | -2.836 | -2.526 | -4.648 | -1.811 | 320495    | IPCEF1  | NM_001170802_10_-1 |
| Luc712   | 0.669  | 0.377  | 1.303  | 1.102  | 0.878  | 1.033  | 1.891  | 2.595  | 2.074  | 2.142  | 192196    | LUC712  | NM_001170848_6_+1  |
| Luc712   | 5.639  | 5.763  | 4.850  | 4.678  | 4.942  | 5.094  | 4.632  | 4.429  | 3.787  | 3.946  | 192196    | LUC712  | NM_001170849_6_+1  |
| Klra2    | -4.981 | -4.981 | -4.738 | -4.819 | -4.962 | -4.956 | -1.030 | -4.933 | 2.379  | -2.366 | 16633     | NA      | NM_001170851_6_-1  |
| Mndal    | 7.620  | 6.996  | 4.781  | 4.241  | 6.595  | 7.699  | 6.833  | 7.059  | 7.025  | 7.462  | 100040462 | IFI16   | NM_001170853_1_-1  |
| Trim36   | 3.867  | 4.634  | 3.525  | 3.433  | 4.786  | 4.515  | 4.383  | 4.255  | 4.141  | 4.625  | 28105     | TRIM36  | NM_001170855_18_-1 |
| BC068281 | -0.696 | 0.321  | -0.857 | -0.770 | 0.176  | 0.463  | -0.127 | 0.494  | 1.050  | 0.475  | 238037    | WDPCP   | NM_001170858_12_+1 |
| Ncald    | 4.170  | 4.837  | -2.475 | -4.610 | -1.038 | -1.082 | -1.836 | -0.952 | -4.981 | -4.981 | 52589     | NCALD   | NM_001170866_15_-1 |
| Ncald    | -0.908 | -3.500 | -4.671 | -4.314 | -0.809 | -1.784 | -4.519 | -4.631 | -4.549 | -4.981 | 52589     | NCALD   | NM_001170867_15_-1 |
| Ncald    | -0.990 | -2.943 | -4.123 | -1.955 | 4.250  | 4.426  | 0.047  | -0.770 | -2.015 | -4.981 | 52589     | NCALD   | NM_001170868_15_-1 |
| Pym1     | -1.458 | -0.102 | -0.107 | -0.898 | -1.654 | -0.552 | -1.722 | -1.152 | 0.088  | -1.266 | 78428     | PYM1    | NM_001170869_10_+1 |
| Trim43b  | -3.530 | -2.478 | -1.148 | -2.582 | -0.094 | -0.311 | -2.351 | -2.220 | -4.250 | -2.827 | 666747    | NA      | NM_001170884_9_-1  |
| Trip4    | 2.907  | 2.719  | 2.855  | 2.774  | 2.866  | 2.864  | 2.750  | 2.485  | 3.178  | 3.522  | 56404     | TRIP4   | NM_001170907_9_-1  |
| Prr13    | 9.152  | 9.230  | 7.777  | 7.536  | 7.561  | 7.627  | 7.745  | 7.788  | 8.455  | 8.141  | 66151     | NA      | NM_001170911_15_+1 |
| Trim66   | -3.847 | -3.765 | -4.878 | -4.449 | -4.985 | -4.957 | -4.953 | -4.625 | -3.278 | -4.981 | 330627    | TRIM66  | NM_001170912_7_-1  |
| Trim66   | -4.076 | -3.953 | -4.912 | -4.891 | -4.983 | -4.972 | -4.980 | -4.816 | -4.375 | -4.981 | 330627    | TRIM66  | NM_001170913_7_-1  |
| Olfr1507 | -0.639 | -2.997 | -4.981 | -4.981 | -4.981 | -4.981 | -4.981 | -4.981 | -4.981 | -4.981 | 57269     | NA      | NM_001170918_14_-1 |
| Plppr3   | 1.604  | 1.182  | 1.136  | 0.751  | 1.036  | 0.582  | 0.352  | 0.493  | 1.369  | 1.131  | 216152    | PLPPR3  | NM_001170935_10_-1 |
| Rnmt     | 0.699  | -0.042 | -2.653 | -2.772 | -0.467 | -2.118 | -4.694 | -2.397 | -2.333 | -1.517 | 67897     | RNMT    | NM_001170953_18_+1 |
| A4galt   | -3.713 | -4.981 | -4.417 | -3.820 | -2.973 | -4.631 | -4.162 | -1.331 | -4.981 | -4.981 | 239559    | A4GALT  | NM_001170954_15_-1 |
| Dtwd2    | -4.651 | -0.613 | -3.350 | -0.384 | -1.584 | -1.967 | -1.082 | -2.905 | -0.406 | -0.018 | 68857     | DTWD2   | NM_001170960_18_-1 |
| Wdr33    | 5.962  | 6.206  | 5.287  | 5.155  | 5.650  | 5.820  | 5.511  | 5.272  | 4.448  | 4.854  | 74320     | WDR33   | NM_001170966_18_+1 |
| Wdr33    | 2.313  | 1.700  | 2.093  | 2.550  | 1.527  | 2.661  | 1.829  | 1.750  | 1.712  | 0.698  | 74320     | WDR33   | NM_001170967_18_+1 |
| Wdr33    | 3.397  | 3.598  | 2.320  | 2.467  | 2.630  | 2.731  | 0.428  | 1.971  | 1.712  | 1.718  | 74320     | WDR33   | NM_001170970_18_+1 |
| Dbndd1   | -0.328 | -1.664 | -2.433 | -4.440 | -3.200 | -4.344 | -3.988 | -4.895 | -4.981 | -3.882 | 72185     | DBNDD1  | NM_001170975_8_-1  |
| Dbndd1   | -4.981 | -4.981 | -3.238 | -4.861 | -3.920 | -4.902 | -3.757 | -4.684 | -4.981 | -4.342 | 72185     | DBNDD1  | NM_001170976_8_-1  |
| Abat     | -2.327 | -4.981 | -4.010 | -2.030 | -2.981 | -1.189 | -4.746 | -3.232 | -3.299 | -2.808 | 268860    | ABAT    | NM_001170978_16_+1 |
| Hnrmnp   | -1.217 | -1.665 | 3.002  | 2.632  | 1.900  | 1.525  | 2.458  | 1.855  | 0.809  | 4.084  | 15381     | HNRNPC  | NM_001170981_14_-1 |
| Hnrmnp   | 6.102  | 6.378  | 6.394  | 6.579  | 6.169  | 6.196  | 6.049  | 5.915  | 5.636  | 5.565  | 15381     | HNRNPC  | NM_001170982_14_-1 |
| Hnrmnp   | 6.931  | 6.776  | 6.570  | 6.576  | 6.585  | 6.499  | 6.324  | 6.328  | 5.567  | 5.575  | 15381     | HNRNPC  | NM_001170983_14_-1 |
| Hnrmnp   | 5.711  | 5.684  | 5.299  | 5.223  | 5.094  | 4.847  | 4.898  | 4.914  | 4.551  | 4.361  | 15381     | HNRNPC  | NM_001170984_14_-1 |
| Kirrel   | -4.981 | -4.981 | -4.936 | -3.893 | -4.975 | -4.975 | -4.977 | -4.994 | -4.981 | -4.981 | 170643    | KIRREL  | NM_001170985_3_-1  |
| Ahcyl2   | 3.117  | 3.264  | 6.208  | 6.303  | 5.612  | 5.708  | 5.692  | 5.968  | 6.455  | 6.759  | 74340     | AHCYL2  | NM_001171000_6_+1  |
| Ahcyl2   | 0.653  | 0.513  | 1.201  | -2.095 | -1.106 | 0.018  | -2.724 | -0.797 | 0.336  | 2.352  | 74340     | AHCYL2  | NM_001171001_6_+1  |
| Degs2    | 2.404  | 2.180  | 3.401  | 2.820  | 2.953  | 2.570  | 2.834  | 2.482  | 2.226  | 1.870  | 70059     | DEGS2   | NM_001171002_12_-1 |
| Mgam     | -3.349 | -3.408 | -4.981 | -4.981 | -3.960 | -3.837 | -4.935 | -2.513 | -2.384 | -2.895 | 232714    | MGAM    | NM_001171003_6_+1  |
| Prkd3    | 1.829  | 1.733  | 5.004  | 3.178  | 3.818  | 3.003  | 4.197  | 4.076  | 5.843  | 5.767  | 75292     | PRKD3   | NM_001171004_17_-1 |
| Prkd3    | 3.398  | 3.717  | 0.396  | 2.208  | 0.587  | 3.087  | 2.705  | 2.527  | 2.292  | 0.991  | 75292     | PRKD3   | NM_001171005_17_-1 |
| Nod1     | 2.180  | 1.386  | 4.531  | 3.894  | 6.366  | 5.708  | 5.946  | 3.629  | 6.404  | 4.755  | 107607    | NOD1    | NM_001171007_6_-1  |
| Slc14a1  | -4.477 | -4.410 | -1.383 | -0.196 | 1.118  | 1.239  | -0.117 | -1.241 | -4.660 | -4.900 | 108052    | SLC14A1 | NM_001171010_18_-1 |
| Slc14a1  | 3.374  | 3.651  | 5.063  | 4.736  | 6.788  | 6.638  | 5.295  | 4.515  | 3.393  | 2.968  | 108052    | SLC14A1 | NM_001171011_18_-1 |
| Gm21948  | -4.673 | -4.473 | -2.229 | -2.227 | -0.953 | -1.984 | -1.726 | -0.914 | -1.358 | -0.344 | 100328588 | IL4I1   | NM_001171024_7_+1  |
| Os9      | 6.192  | 6.182  | 5.845  | 6.123  | 5.739  | 5.658  | 6.157  | 6.224  | 6.582  | 6.569  | 216440    | OS9     | NM_001171026_10_-1 |
| Tmbim6   | -1.552 | 0.772  | 0.862  | -0.552 | 0.057  | -1.310 | 0.517  | -1.010 | -2.108 | -4.873 | 110213    | TMBIM6  | NM_001171034_15_+1 |
| Tmbim6   | -3.545 | 0.930  | 1.376  | 2.159  | 2.201  | 2.519  | 1.588  | 1.682  | 2.133  | 2.682  | 110213    | TMBIM6  | NM_001171035_15_+1 |
| Tmbim6   | 1.227  | 0.896  | 0.967  | -0.958 | -0.781 | 0.106  | -0.125 | -2.552 | 0.520  | 0.881  | 110213    | TMBIM6  | NM_001171036_15_+1 |
| Mta3     | -0.018 | 3.386  | 1.787  | 3.116  | 2.417  | 4.333  | 2.121  | 2.873  | 1.915  | 3.245  | 116871    | MTA3    | NM_001171052_17_+1 |
| Mta3     | 4.240  | 4.395  | 3.822  | 4.122  | 4.309  | 4.547  | 3.883  | 3.694  | 4.089  | 3.757  | 116871    | MTA3    | NM_001171053_17_+1 |
| Mta3     | 3.922  | 3.648  | 3.721  | 4.284  | 4.432  | 4.757  | 3.864  | 3.783  | 3.425  | 3.505  | 116871    | MTA3    | NM_001171054_17_+1 |
| Yap1     | -3.563 | -3.875 | -4.967 | -4.617 | -4.964 | -4.858 | -4.909 | -4.750 | -4.981 | -4.666 | 22601     | YAP1    | NM_001171147_9_-1  |
| Mal      | -4.981 | -4.981 | -3.553 | -4.970 | -4.981 | -4.981 | -4.970 | -4.975 | -4.981 | -4.981 | 17153     | MAL     | NM_001171187_2_-1  |
| Obscn    | 4.775  | 3.950  | -4.080 | -4.289 | -4.416 | -4.960 | -4.479 | -4.625 | -4.906 | -4.342 | 380698    | OBSCN   | NM_001171512_11_-1 |
| Mars     | 1.862  | 1.259  | 0.932  | 0.139  | 1.970  | 0.998  | 1.722  | 1.740  | 3.008  | 2.153  | 216443    | MARS    | NM_001171582_10_-1 |
| Actl10   | -4.981 | -4.981 | -4.776 | -4.083 | -4.975 | -4.872 | -4.899 | -4.497 | -4.981 | -3.797 | 70362     | ACTL10  | NM_001171640_2_+1  |
| Bag1     | 6.361  | 6.448  | 6.250  | 6.363  | 5.820  | 5.879  | 5.971  | 6.058  | 5.778  | 5.730  | 12017     | BAG1    | NM_001171739_4_-1  |
| Triqk    | 1.427  | 2.983  | 0.705  | 3.470  | 0.603  | 2.386  | -1.732 | -0.341 | -3.883 | -4.535 | 208820    | TRIQK   | NM_001171801_4_+1  |
| Il11ra1  | -3.983 | -0.436 | -4.194 | -2.325 | -4.689 | -3.045 | -4.543 | -4.772 | -4.572 | -4.844 | 16157     | IL11RA  | NM_001172054_4_+1  |
| Lman1    | 5.110  | 5.139  | 3.897  | 4.081  | 2.886  | 3.388  | 3.518  | 4.144  | 2.954  | 2.903  | 70361     | LMAN1   | NM_001172062_18_-1 |
| Lrrc56   | 0.964  | -0.745 | 0.527  | -1.031 | -0.509 | -0.233 | -0.147 | -0.295 | 1.126  | 1.056  | 70552     | LRRC56  | NM_001172064_7_+1  |

|               |        |        |        |        |        |        |        |        |        |        |           |          |                     |
|---------------|--------|--------|--------|--------|--------|--------|--------|--------|--------|--------|-----------|----------|---------------------|
| Lrrc56        | -1.026 | 0.605  | -1.780 | -0.834 | -0.883 | -1.279 | -1.568 | -1.746 | -0.041 | -4.378 | 70552     | LRRC56   | NM_001172065_7_+_1  |
| Senp8         | 0.597  | 1.245  | 0.473  | 1.122  | 0.697  | 1.354  | 0.508  | -2.428 | -4.433 | -1.110 | 71599     | SENP8    | NM_001172068_9_-_1  |
| Senp8         | -1.241 | 0.475  | 0.594  | -0.137 | -0.363 | 0.030  | -1.984 | -0.866 | -4.026 | -4.384 | 71599     | SENP8    | NM_001172069_9_-_1  |
| Senp8         | -0.028 | -3.375 | 0.259  | -1.101 | 0.052  | -1.224 | -0.165 | -3.657 | -3.886 | -0.448 | 71599     | SENP8    | NM_001172070_9_-_1  |
| Senp8         | 1.146  | -3.504 | 0.914  | -2.324 | -0.767 | -1.423 | -0.530 | 0.191  | -4.011 | -0.871 | 71599     | SENP8    | NM_001172071_9_-_1  |
| Ttc4          | -4.087 | -3.606 | -2.117 | -1.319 | -2.754 | -1.470 | -3.070 | -2.454 | -4.133 | -4.507 | 72354     | TTC4     | NM_001172073_4_-_1  |
| 3110009E18Rik | 0.293  | 0.228  | -1.743 | -1.334 | -1.958 | -1.115 | -0.725 | -1.599 | -0.486 | -0.978 | 73103     | C2orf76  | NM_001172074_1_+_1  |
| Depdc1a       | -4.981 | -4.981 | 0.164  | 0.856  | 0.854  | -0.137 | -0.446 | -0.496 | -1.431 | 0.013  | 76131     | DEPDC1   | NM_001172092_3_+_1  |
| Depdc1a       | -4.981 | -2.349 | 1.629  | 1.381  | 1.531  | 0.836  | 1.297  | -0.139 | -0.585 | -0.064 | 76131     | DEPDC1   | NM_001172093_3_+_1  |
| Kdm4c         | -2.771 | -3.739 | -2.554 | -3.499 | -4.575 | -4.830 | -2.149 | -2.838 | -1.327 | 0.673  | 76804     | KDM4C    | NM_001172095_4_+_1  |
| Cacul1        | 0.716  | 1.403  | 2.166  | 0.978  | 0.409  | 1.056  | 0.550  | 0.769  | 2.125  | 1.781  | 78832     | CACUL1   | NM_001172096_19_-_1 |
| Cacul1        | -3.955 | -4.514 | -2.060 | -4.849 | -4.402 | -4.916 | -2.349 | -4.795 | -4.260 | -2.161 | 78832     | CACUL1   | NM_001172097_19_-_1 |
| Strn3         | 5.725  | 5.882  | 5.553  | 5.303  | 5.368  | 5.360  | 5.577  | 5.642  | 5.728  | 6.048  | 94186     | STRN3    | NM_001172098_12_-_1 |
| Cuedc1        | -0.609 | -0.894 | -0.035 | -0.419 | -1.344 | -3.148 | -1.821 | -2.030 | -3.471 | -1.776 | 103841    | CUEDC1   | NM_001172099_11_+_1 |
| Rnh1          | 7.311  | 7.075  | 7.551  | 7.493  | 6.794  | 6.855  | 7.184  | 7.263  | 8.059  | 7.809  | 107702    | RNH1     | NM_001172100_7_-_1  |
| Rnh1          | 6.553  | 6.903  | 6.559  | 7.010  | 4.329  | 4.422  | 4.688  | 5.240  | 4.776  | 4.961  | 107702    | RNH1     | NM_001172101_7_-_1  |
| Zbtb25        | 1.945  | 1.442  | 0.079  | 0.301  | 0.535  | 0.902  | -0.487 | -0.459 | -1.506 | 0.313  | 109929    | ZBTB25   | NM_001172104_12_-_1 |
| Gramd1c       | -3.345 | -3.551 | -4.355 | -3.570 | -1.916 | -1.672 | -1.130 | -4.696 | -3.270 | -0.715 | 207798    | NA       | NM_001172107_16_-_1 |
| Dhrs7b        | 3.488  | 3.995  | 2.318  | 2.467  | 2.871  | 2.808  | 2.076  | 2.490  | 2.410  | 2.266  | 216820    | DHRS7B   | NM_001172112_11_+_1 |
| Traf7         | 4.766  | 5.064  | 4.859  | 4.917  | 4.932  | 5.007  | 4.982  | 4.935  | 5.466  | 5.104  | 224619    | TRAF7    | NM_001172113_17_-_1 |
| Traf7         | 4.547  | 4.437  | 4.340  | 4.077  | 4.359  | 3.839  | 4.471  | 3.946  | 4.714  | 4.557  | 224619    | TRAF7    | NM_001172114_17_-_1 |
| Hck           | 4.312  | 6.457  | 7.348  | 7.501  | 8.302  | 8.086  | 8.095  | 8.069  | 8.460  | 8.757  | 15162     | HCK      | NM_001172117_2_+_1  |
| Exog          | 1.449  | 0.717  | -0.864 | 0.993  | 1.373  | 1.043  | 1.302  | 1.442  | 2.033  | 1.948  | 208194    | EXOG     | NM_001172136_9_+_1  |
| Aimp2         | 5.155  | 5.267  | 4.747  | 4.824  | 4.641  | 4.550  | 4.491  | 4.530  | 3.661  | 3.175  | 231872    | AIMP2    | NM_001172146_5_-_1  |
| Rbm41         | -3.700 | 0.424  | -2.606 | -0.078 | -4.326 | -4.372 | -1.511 | -3.512 | -3.056 | 0.014  | 237073    | RBM41    | NM_001172147_X_-_1  |
| Rbm41         | -4.981 | -4.981 | -3.399 | -4.464 | -4.930 | -4.930 | -4.098 | -4.585 | -4.981 | -4.981 | 237073    | RBM41    | NM_001172148_X_-_1  |
| Dnase1l1      | 2.501  | 0.690  | 0.990  | 1.542  | -2.613 | -3.141 | 1.645  | 0.652  | 3.089  | 2.942  | 69537     | DNASE1L1 | NM_001172154_X_-_1  |
| Dis3l2        | 1.259  | 1.808  | 1.914  | 0.801  | 1.743  | 1.373  | 1.990  | 1.242  | 1.369  | 1.226  | 208718    | DIS3L2   | NM_001172157_1_+_1  |
| Flrt3         | -4.981 | -4.981 | -4.934 | -4.015 | -1.673 | -4.936 | -1.919 | -4.897 | -4.981 | -4.972 | 71436     | FLRT3    | NM_001172160_2_-_1  |
| Arid5a        | 5.670  | 5.709  | 2.737  | 2.845  | 3.386  | 3.547  | 4.020  | 4.666  | 5.671  | 5.377  | 214855    | ARID5A   | NM_001172205_1_+_1  |
| Arid5a        | 3.676  | 3.511  | 1.950  | 2.231  | 0.815  | 1.933  | 1.642  | 1.093  | 3.213  | 3.263  | 214855    | ARID5A   | NM_001172206_1_+_1  |
| Lrtm2         | -0.135 | -2.634 | -3.468 | -4.445 | -1.357 | -2.169 | -3.284 | -4.828 | -1.656 | -4.981 | 211187    | LRTM2    | NM_001172207_6_-_1  |
| Fam221a       | -0.454 | 0.544  | -1.702 | -2.225 | -2.142 | -1.491 | -2.489 | -1.228 | -0.987 | -1.983 | 231946    | FAM221A  | NM_001172216_6_+_1  |
| Dhrs3         | -0.017 | 2.546  | -0.213 | 2.752  | 2.734  | 3.898  | 1.708  | 3.684  | 2.359  | 3.144  | 20148     | DHRS3    | NM_001172424_4_+_1  |
| Sphk1         | -4.981 | -2.147 | -4.903 | -1.117 | -4.165 | -0.895 | -4.359 | -0.795 | -4.928 | -4.917 | 20698     | SPHK1    | NM_001172472_11_+_1 |
| Sphk1         | -4.981 | -4.852 | -4.015 | -3.682 | -4.921 | -4.724 | -3.934 | -2.872 | -3.389 | -3.367 | 20698     | SPHK1    | NM_001172473_11_+_1 |
| Sphk1         | -4.981 | -4.873 | -4.941 | -1.076 | -3.474 | -0.815 | -4.847 | -2.272 | -4.976 | -2.799 | 20698     | SPHK1    | NM_001172475_11_+_1 |
| Aspn          | -2.508 | -2.292 | -3.967 | -4.199 | -4.547 | -4.124 | -4.871 | -4.978 | -4.981 | -4.981 | 66695     | ASPN     | NM_001172481_13_+_1 |
| Sphk2         | 0.980  | -1.158 | 0.793  | 1.489  | 0.676  | 0.784  | 1.113  | 1.218  | 3.138  | 3.212  | 56632     | SPHK2    | NM_001172561_7_-_1  |
| Mrgpra2a      | -4.981 | -4.981 | -2.728 | -1.959 | -2.522 | -1.193 | -4.161 | -0.056 | -0.367 | -1.451 | 668727    | MRGPRX3  | NM_001172588_7_-_1  |
| Fxyd4         | -4.981 | -3.448 | -4.091 | -3.806 | -0.907 | -3.664 | -3.885 | -4.276 | -4.522 | -4.981 | 108017    | FXYD4    | NM_001173372_6_-_1  |
| LOC100038947  | -0.552 | -2.674 | 0.041  | 1.674  | 6.716  | 6.708  | 8.267  | 8.791  | 9.009  | 9.645  | 100038947 | NA       | NM_001173459_3_-_1  |
| Sirpb1b       | 0.910  | -2.239 | 1.346  | 1.294  | 7.017  | 7.400  | 7.519  | 7.390  | 7.020  | 7.400  | 668101    | SIRPB1   | NM_001173460_3_-_1  |
| Speg          | -4.981 | -4.981 | -4.839 | -4.973 | -4.099 | -3.494 | -4.981 | -4.981 | -4.981 | -4.981 | 11790     | SPEG     | NM_001173477_1_+_1  |
| Mfsd4b3       | -4.981 | -1.910 | -4.796 | -4.971 | -4.982 | -4.814 | -3.674 | -2.718 | -1.806 | -0.050 | 100041085 | NA       | NM_001173500_10_-_1 |
| Map1a         | -4.981 | -4.981 | -4.848 | -4.578 | -4.598 | -3.768 | -4.959 | -3.434 | -3.164 | -1.323 | 17754     | MAP1A    | NM_001173506_2_+_1  |
| Taz           | 3.227  | 3.701  | 2.628  | 3.191  | 2.840  | 2.388  | 2.671  | 2.784  | 3.108  | 2.866  | 66826     | TAZ      | NM_001173547_X_+_1  |
| CSar1         | -4.424 | -4.271 | -4.647 | -4.105 | -1.891 | -4.405 | -0.146 | 2.682  | 4.008  | 4.904  | 12273     | CSAR1    | NM_001173550_7_-_1  |
| Cdc14a        | -4.556 | -0.836 | -4.048 | -3.371 | -4.598 | -4.898 | -4.204 | -4.191 | -4.016 | -4.608 | 229776    | CDC14A   | NM_001173553_3_-_1  |
| Cacna2d2      | -4.145 | -2.993 | -3.552 | -3.774 | -3.832 | -2.261 | -4.958 | -4.164 | -4.981 | -4.084 | 56808     | CACNA2D2 | NM_001174047_9_+_1  |
| Cacna2d2      | -4.065 | -2.676 | -2.968 | -3.774 | -3.228 | -3.060 | -4.980 | -4.622 | -4.981 | -3.982 | 56808     | CACNA2D2 | NM_001174048_9_+_1  |
| Cacna2d2      | -3.533 | -2.569 | -4.087 | -1.633 | -4.008 | -2.141 | -4.961 | -4.140 | -4.981 | -3.921 | 56808     | CACNA2D2 | NM_001174049_9_+_1  |
| Cacna2d2      | -3.551 | -2.606 | -4.159 | -3.066 | -4.165 | -2.375 | -4.965 | -4.219 | -4.981 | -3.943 | 56808     | CACNA2D2 | NM_001174050_9_+_1  |
| Camk2b        | -2.866 | -4.981 | -2.687 | -3.973 | -1.521 | -4.579 | -2.472 | -4.391 | -0.415 | -4.981 | 12323     | CAMK2B   | NM_001174053_11_-_1 |
| Camk2b        | -3.348 | -4.981 | 0.035  | -1.474 | -1.456 | -1.738 | -0.462 | -4.803 | -1.644 | -4.981 | 12323     | CAMK2B   | NM_001174054_11_-_1 |
| Pcbp2         | 4.333  | 3.943  | 4.849  | 4.261  | 4.468  | 3.635  | 4.719  | 3.675  | 3.714  | 3.175  | 18521     | PCBP2    | NM_001174073_15_+_1 |
| Celf4         | 0.931  | -0.229 | 2.584  | 1.820  | 3.346  | 3.351  | 4.563  | 5.196  | 1.431  | 3.193  | 108013    | CELF4    | NM_001174074_18_-_1 |
| Smarca4       | 4.707  | 4.871  | 4.789  | 4.807  | 4.656  | 5.223  | 5.287  | 4.776  | 4.515  | 4.765  | 20586     | SMARCA4  | NM_001174078_9_+_1  |
| Smarca4       | 4.485  | 3.843  | 4.336  | 4.147  | 4.890  | 4.398  | 4.069  | 3.233  | 3.574  | 3.788  | 20586     | SMARCA4  | NM_001174079_9_+_1  |
| Shisa9        | -4.981 | -4.981 | -2.620 | -1.384 | -4.866 | -3.193 | -4.682 | -3.648 | -4.981 | -4.409 | 72555     | SHISA9   | NM_001174086_16_+_1 |
| Map3k9        | 1.922  | 2.241  | 2.939  | 2.579  | 2.319  | 1.964  | 1.463  | 1.887  | 2.617  | 1.848  | 338372    | MAP3K9   | NM_001174107_12_-_1 |
| Gm37013       | -4.981 | -4.136 | -4.974 | -4.867 | -4.979 | -4.979 | -4.978 | -4.915 | -4.981 | -4.981 | 100384868 | NA       | NM_001174154_18_+_1 |
| Rasgrp4       | 2.294  | 1.930  | 4.145  | 4.023  | 3.327  | 3.916  | 3.900  | 3.125  | 4.365  | 4.817  | 233046    | RASGRP4  | NM_001174155_7_+_1  |
| Tmidg3        | -2.401 | -2.960 | -4.846 | -4.591 | -4.476 | -4.936 | -4.924 | -4.907 | -4.981 | -4.950 | 69296     | NA       | NM_001174169_3_+_1  |
| Serpinb2      | -4.019 | -4.981 | 4.097  | 3.733  | 2.712  | 3.641  | 0.875  | 0.512  | -0.230 | -0.187 | 18788     | SERPINB2 | NM_001174170_1_+_1  |
| Rara          | -0.591 | -0.996 | 1.213  | 0.836  | 1.824  | 1.429  | 3.627  | 3.611  | 6.553  | 6.299  | 19401     | RARA     | NM_001176528_11_+_1 |
| Rara          | -0.438 | -0.969 | -2.640 | -2.539 | -2.137 | -0.700 | -0.147 | -0.129 | 2.754  | 1.573  | 19401     | RARA     | NM_001177302_11_+_1 |
| Rara          | -0.285 | 1.741  | 0.798  | -3.311 | -0.641 | -1.858 | -0.185 | -0.424 | 1.637  | 1.423  | 19401     | RARA     | NM_001177303_11_+_1 |
| Aldoa         | 3.536  | 2.987  | 4.136  | 4.687  | 3.220  | 3.216  | 3.928  | 4.213  | 4.692  | 5.003  | 11674     | ALDOA    | NM_001177307_7_-_1  |
| Aldoa         | 6.392  | 6.505  | 5.999  | 6.742  | 4.077  | 4.805  | 5.501  | 5.447  | 5.264  | 4.889  | 11674     | ALDOA    | NM_001177308_7_-_1  |
| Orc4          | 3.172  | 3.526  | 3.153  | 2.725  | 2.694  | 2.466  | 2.728  | 2.749  | 2.258  | 2.367  | 26428     | ORC4     | NM_001177313_2_-_1  |
| Tfpi          | 1.343  | -2.519 | -2.812 | -2.964 | -3.104 | -3.391 | -0.205 | -0.983 | 0.263  | 1.239  | 21788     | TFPI     | NM_001177319_2_-_1  |
| Tfpi          | -3.100 | 0.043  | -0.989 | -2.603 | -2.042 | -2.319 | -0.523 | -0.464 | 0.496  | -1.119 | 21788     | TFPI     | NM_001177320_2_-_1  |
| Sept6         | -3.617 | 1.587  | 2.471  | 1.861  | 1.218  | 0.683  | 0.709  | 1.270  | -1.118 | -0.724 | 56526     | SEPT6    | NM_001177323_X_-_1  |

|                |        |        |        |        |        |        |        |        |        |        |               |           |                          |
|----------------|--------|--------|--------|--------|--------|--------|--------|--------|--------|--------|---------------|-----------|--------------------------|
| Sept6          | -2.001 | -4.981 | -2.795 | -2.818 | -4.962 | -4.216 | -3.234 | -2.274 | -4.972 | -1.801 | 56526         | SEPT6     | NM_001177324_X_-_1       |
| 1700092M07Rik  | -2.620 | -3.267 | -2.475 | -4.280 | -4.059 | -4.692 | -4.261 | -4.702 | -3.351 | -3.882 | 74307         | NA        | NM_001177347_19_+_1      |
| Ifi213         | -0.096 | -1.669 | -3.686 | -4.632 | 1.544  | -4.774 | 1.650  | -4.603 | 2.548  | -4.468 | 623121        | IFI16     | NM_001177349_1_-_1       |
| Ifi213         | 2.635  | -1.616 | 1.175  | -3.161 | 4.294  | -3.398 | 4.403  | -2.860 | 5.058  | -2.872 | 623121        | IFI16     | NM_001177350_1_-_1       |
| Myc            | 0.174  | -1.678 | 2.686  | 3.274  | 3.297  | 3.936  | 3.218  | 4.495  | 1.056  | 1.840  | 17869         | MYC       | NM_001177352_15_+_1      |
| Myc            | -0.891 | -2.261 | 1.292  | 2.009  | 1.702  | 2.540  | 1.356  | 2.747  | -0.500 | -1.047 | 17869         | MYC       | NM_001177353_15_+_1      |
| Myc            | -0.891 | -2.261 | 1.292  | 2.009  | 1.702  | 2.540  | 1.356  | 2.747  | -0.500 | -1.047 | 17869         | MYC       | NM_001177354_15_+_1      |
| Gpr137         | 1.983  | 2.203  | 1.962  | 0.914  | 1.404  | 1.358  | 0.285  | 1.653  | 2.123  | 2.099  | 107173        | GPR137    | NM_001177360_19_-_1      |
| Gpr137         | -1.185 | 0.257  | 0.201  | 0.046  | -0.705 | -1.774 | -0.012 | -0.247 | 0.136  | -0.003 | 107173        | GPR137    | NM_001177361_19_-_1      |
| Gpr137         | 4.309  | 4.560  | 3.884  | 3.897  | 3.625  | 4.259  | 3.592  | 3.508  | 3.497  | 3.779  | 107173        | GPR137    | NM_001177362_19_-_1      |
| Fut7           | -3.955 | -3.528 | -0.828 | -2.139 | 1.635  | -0.504 | 2.006  | 1.272  | 2.397  | 1.951  | 14347         | FUT7      | NM_001177366_2_+_1       |
| Fut7           | -4.459 | -4.133 | -0.869 | -2.406 | 1.901  | -1.779 | 2.487  | 2.028  | 2.407  | 2.902  | 14347         | FUT7      | NM_001177367_2_+_1       |
| Nfkb2          | 5.011  | 4.446  | 6.266  | 6.520  | 6.960  | 6.849  | 6.895  | 6.846  | 6.819  | 7.310  | 18034         | NFKB2     | NM_001177369_19_+_1      |
| Nfkb2          | 1.426  | 0.895  | 1.793  | 2.399  | 3.038  | 3.084  | 3.160  | 2.637  | 3.415  | 2.899  | 18034         | NFKB2     | NM_001177370_19_+_1      |
| Dbn1           | -4.757 | -4.981 | -1.723 | -3.576 | -4.938 | -4.947 | -4.531 | -4.020 | -4.534 | -4.873 | 56320         | DBN1      | NM_001177371_13_-_1      |
| Dbn1           | -1.875 | -4.981 | 4.563  | 4.106  | -1.355 | 0.239  | -0.833 | 0.441  | -3.278 | -3.435 | 56320         | DBN1      | NM_001177372_13_-_1      |
| Klk11          | -4.981 | -4.981 | -4.981 | -4.981 | -4.978 | -4.627 | -4.981 | -4.981 | -4.981 | -4.981 | 56538         | KLK11     | NM_001177373_7_+_1       |
| Ubr2           | 3.411  | 3.503  | 4.843  | 3.761  | 5.115  | 4.683  | 5.217  | 4.062  | 5.396  | 4.698  | 224826        | UBR2      | NM_001177374_17_-_1      |
| Cpeb2          | 1.214  | 1.740  | 2.949  | 2.425  | 1.060  | 1.468  | 0.593  | 1.529  | 2.706  | 3.029  | 231207        | CPEB2     | NM_001177379_5_+_1       |
| Gm13547        | -4.981 | -4.981 | -4.933 | -4.933 | -4.670 | -4.814 | -4.975 | -4.672 | -2.739 | -3.855 | 433416        | NA        | NM_001177392_2_+_1       |
| Zfp971         | 0.677  | 0.042  | 2.105  | 1.722  | 2.702  | 2.098  | 3.254  | 2.955  | 5.452  | 5.909  | 626848        | ZNF442    | NM_001177399_2_+_1       |
| Zfp971         | 4.150  | 3.786  | 3.561  | 2.994  | 3.627  | 2.511  | 3.817  | 3.158  | 4.628  | 4.102  | 626848        | ZNF442    | NM_001177400_2_+_1       |
| Cebpz          | 4.705  | 4.252  | 3.461  | 3.535  | 3.612  | 3.351  | 3.913  | 3.426  | 3.157  | 2.499  | 68554         | NA        | NM_001177402_17_+_1      |
| Cebpz          | 3.854  | 3.655  | 3.433  | 2.530  | 3.246  | 2.952  | 2.855  | 2.467  | 2.490  | 1.609  | 68554         | NA        | NM_001177403_17_+_1      |
| Zfp967         | -3.678 | -2.528 | -4.120 | -4.344 | -4.208 | -4.787 | -3.906 | -3.141 | -2.615 | -4.635 | 100303732     | ZNF442    | NM_001177404_2_+_1       |
| Zfp967         | -3.678 | -2.984 | -4.113 | -4.357 | -4.229 | -3.569 | -4.137 | -4.320 | -3.718 | -2.131 | 100303732     | ZNF442    | NM_001177404_dup1_2_-_1  |
| Zfp967         | -3.678 | -2.984 | -4.108 | -4.615 | -4.421 | -4.865 | -4.139 | -4.320 | -3.803 | -3.362 | 100303732     | ZNF442    | NM_001177404_dup2_2_-_2  |
| Zfp967         | -3.678 | -2.984 | -4.108 | -4.615 | -4.421 | -4.865 | -4.117 | -4.140 | -3.803 | -4.635 | 100303732     | ZNF442    | NM_001177404_dup3_2_+_2  |
| Zfp966         | -3.678 | -2.528 | -4.120 | -4.344 | -4.208 | -4.787 | -3.906 | -3.141 | -2.615 | -4.635 | 667962        | ZNF442    | NM_001177405_2_+_1       |
| Zfp966         | -3.678 | -2.984 | -4.113 | -4.357 | -4.229 | -3.569 | -4.137 | -4.320 | -3.718 | -2.131 | 667962        | ZNF442    | NM_001177405_dup1_2_-_1  |
| Zfp966         | -3.678 | -2.984 | -4.108 | -4.615 | -4.421 | -4.865 | -4.139 | -4.320 | -3.803 | -3.362 | 667962        | ZNF442    | NM_001177405_dup2_2_-_2  |
| Zfp966         | -3.678 | -2.984 | -4.108 | -4.615 | -4.421 | -4.865 | -4.117 | -4.140 | -3.803 | -4.635 | 667962        | ZNF442    | NM_001177405_dup3_2_+_2  |
| Zfp967         | -1.414 | -0.416 | -2.607 | -0.699 | -3.201 | -2.740 | -2.322 | -1.876 | -2.815 | 0.647  | 100303732     | ZNF442    | NM_001177406_2_+_1       |
| Zfp967         | -1.414 | -0.724 | -0.755 | -1.292 | -1.538 | -0.040 | -1.100 | -0.416 | -1.365 | -0.314 | 100303732     | ZNF442    | NM_001177406_dup1_2_-_1  |
| Zfp967         | -1.414 | -1.434 | -2.626 | -0.978 | -3.315 | -3.638 | -2.566 | -3.600 | -2.679 | -2.668 | 100303732     | ZNF442    | NM_001177406_dup2_2_-_2  |
| Zfp967         | -1.414 | -1.434 | -2.477 | -1.087 | -3.138 | -3.698 | -2.509 | -3.196 | -2.831 | -2.734 | 100303732     | ZNF442    | NM_001177406_dup3_2_+_2  |
| Zfp966         | -1.414 | -0.416 | -2.607 | -0.699 | -3.201 | -2.740 | -2.322 | -1.876 | -2.815 | 0.647  | 667962        | ZNF442    | NM_001177407_2_+_1       |
| Zfp966         | -1.414 | -0.724 | -0.755 | -1.292 | -1.538 | -0.040 | -1.100 | -0.416 | -1.365 | -0.314 | 667962        | ZNF442    | NM_001177407_dup1_2_-_1  |
| Zfp966         | -1.414 | -1.434 | -2.626 | -0.978 | -3.315 | -3.638 | -2.566 | -3.600 | -2.679 | -2.668 | 667962        | ZNF442    | NM_001177407_dup2_2_-_2  |
| Zfp966         | -1.414 | -1.434 | -2.477 | -1.087 | -3.138 | -3.698 | -2.509 | -3.196 | -2.831 | -2.734 | 667962        | ZNF442    | NM_001177407_dup3_2_+_2  |
| Gm15319        | -4.981 | -4.981 | -4.738 | -4.952 | -4.878 | -4.869 | -4.973 | -4.977 | -4.981 | -4.981 | 100040599     | NA        | NM_001177408_8_-_1       |
| Usp35          | 2.211  | 1.460  | 3.657  | 3.768  | 4.027  | 4.180  | 3.881  | 2.898  | 2.223  | 2.516  | 244144        | USP35     | NM_001177412_7_-_1       |
| Eid2b          | 3.067  | 3.085  | 2.020  | 2.256  | 2.828  | 2.689  | 2.619  | 2.620  | 2.804  | 2.650  | 434156        | EID2B     | NM_001177427_7_+_1       |
| Aldh3b2        | -4.981 | -1.952 | -4.923 | -2.037 | -4.411 | -3.531 | -4.971 | -2.364 | -4.981 | -4.981 | 621603        | NA        | NM_001177438_19_+_1      |
| Zfp516         | 2.732  | 2.225  | 4.123  | 4.263  | 3.947  | 3.071  | 3.313  | 3.030  | 3.159  | 2.465  | 329003        | ZNF516    | NM_001177464_18_+_1      |
| Gm7030         | -0.328 | -1.080 | -1.605 | -1.550 | -1.707 | -3.405 | -1.542 | -2.436 | -0.317 | -0.863 | 630294        | HLA-F     | NM_001177467_17_-_1      |
| Gm15056        | -3.668 | -1.816 | -4.953 | -3.150 | -3.301 | 1.087  | -1.997 | 2.613  | -4.981 | -4.981 | 100504014     | NA        | NM_001177471_8_-_1       |
| Gm14391        | 1.012  | -0.345 | -0.264 | -2.834 | -0.039 | -3.934 | -0.908 | -3.381 | -0.220 | -2.772 | 665001        | ZNF442    | NM_001177480_2_+_1       |
| Gm14391        | 1.012  | -0.436 | 0.119  | -2.724 | -0.399 | -3.873 | -0.297 | -2.049 | -1.433 | -2.772 | 665001        | ZNF442    | NM_001177480_dup1_2_-_1  |
| Defa30         | -4.981 | -4.981 | -4.976 | -3.674 | -4.938 | -4.153 | -4.896 | -3.040 | -4.981 | -4.981 | 100038927     | NA        | NM_001177485_8_-_1       |
| Zkscan7        | 1.661  | 1.875  | 1.694  | 1.847  | 2.074  | 2.084  | 1.031  | 1.071  | 0.265  | 0.884  | 382118        | ZKSCAN7   | NM_001177505_9_+_1       |
| 4933402N22Rik  | -4.981 | -4.981 | -4.950 | -4.868 | -4.319 | -4.984 | -4.937 | -3.230 | -4.981 | -4.981 | 545732        | NA        | NM_001177510_5_+_1       |
| Gm7102         | -1.232 | -0.259 | -1.244 | -0.044 | -0.943 | -0.333 | -1.698 | -1.648 | -0.692 | -0.810 | 633057        | NA        | NM_001177513_19_-_1      |
| Gml            | -4.981 | -4.981 | -4.864 | -2.746 | -4.914 | -3.481 | -4.942 | -2.404 | -4.981 | -4.981 | 625599        | GML       | NM_001177524_15_-_1      |
| Zfp964         | -4.981 | -1.972 | -1.838 | -1.108 | -0.227 | 0.306  | -1.385 | -2.009 | -4.981 | -2.940 | 636741        | NA        | NM_001177527_8_+_1       |
| Prdm11         | 0.383  | 0.376  | 0.076  | 0.066  | 0.954  | 0.545  | 0.418  | -0.080 | 0.151  | -0.335 | 100042784     | PRDM11    | NM_001177536_2_-_1       |
| Duxbl2         | 3.813  | 1.389  | -4.981 | -4.981 | -4.981 | -4.981 | -4.981 | -4.981 | -4.981 | -4.981 | 100039227     | NA        | NM_001177538_14_+_1      |
| Duxbl2         | 2.617  | -0.338 | -4.981 | -4.981 | -4.981 | -4.981 | -4.981 | -4.981 | -4.981 | -4.981 | 100039227     | NA        | NM_001177538_dup1_14_+_1 |
| Duxbl2         | 2.617  | -0.338 | -4.981 | -4.981 | -4.981 | -4.981 | -4.981 | -4.981 | -4.981 | -4.981 | 100039227     | NA        | NM_001177538_dup2_14_+_1 |
| Duxbl3         | 3.813  | 1.389  | -4.981 | -4.981 | -4.981 | -4.981 | -4.981 | -4.981 | -4.981 | -4.981 | 100039293     | NA        | NM_001177539_14_+_1      |
| Duxbl3         | 2.617  | -0.338 | -4.981 | -4.981 | -4.981 | -4.981 | -4.981 | -4.981 | -4.981 | -4.981 | 100039293     | NA        | NM_001177539_dup1_14_+_1 |
| Duxbl3         | 2.617  | -0.338 | -4.981 | -4.981 | -4.981 | -4.981 | -4.981 | -4.981 | -4.981 | -4.981 | 100039293     | NA        | NM_001177539_dup2_14_+_1 |
| 0610010B08Rik  | 1.202  | 0.431  | 0.713  | 1.001  | 1.939  | 1.250  | 0.917  | 0.526  | 2.008  | 1.419  | 100039060     | NA        | NM_001177543_2_-_1       |
| 0610010B08Rik  | -1.533 | -1.848 | -2.477 | -2.972 | -3.380 | -3.625 | -1.960 | -3.969 | -2.558 | -2.468 | 100039060     | NA        | NM_001177543_dup1_2_-_2  |
| 0610010B08Rik  | -1.335 | 0.124  | -0.268 | 0.030  | -0.736 | -0.728 | 0.094  | 0.047  | -0.539 | -0.180 | 100039060     | NA        | NM_001177543_dup2_2_+_1  |
| 0610010B08Rik  | -1.533 | -1.848 | -1.889 | -2.942 | -2.930 | -3.045 | -2.944 | -3.837 | -2.558 | -2.446 | 100039060     | NA        | NM_001177543_dup3_2_+_2  |
| 0610010B08Rik  | -1.655 | -2.119 | -2.583 | -3.450 | -3.559 | -3.674 | -2.699 | -4.051 | -2.558 | -3.072 | 100039060     | NA        | NM_001177543_dup4_2_-_3  |
| 0610010B08Rik  | -1.655 | -2.039 | -2.580 | -3.337 | -3.506 | -3.058 | -2.749 | -4.050 | -2.558 | -3.072 | 100039060     | NA        | NM_001177543_dup5_2_-_4  |
| Hist1h2ao      | 4.914  | 5.213  | 6.443  | 6.723  | 8.052  | 7.897  | 7.406  | 6.984  | 5.815  | 4.771  | 665433        | HIST1H2AC | NM_001177544_13_+_1      |
| Hist1h2ao      | 4.590  | 4.252  | 5.723  | 6.238  | 7.602  | 7.137  | 7.062  | 6.355  | 5.754  | 4.461  | 665433        | HIST1H2AC | NM_001177544_dup1_13_-_1 |
| Zfp600         | -4.981 | -2.473 | -4.971 | -4.306 | -4.962 | -3.648 | -4.931 | -3.168 | -4.981 | -4.125 | 667666        | ZNF616    | NM_001177545_4_+_1       |
| Zfp600         | -4.981 | -3.996 | -4.978 | -4.847 | -4.975 | -4.927 | -4.955 | -4.829 | -4.981 | -4.778 | 667666        | ZNF616    | NM_001177546_4_+_1       |
| Record_removed | 1.263  | 1.559  | 1.166  | 1.626  | 1.948  | 2.093  | 1.374  | 1.139  | -0.572 | 1.034  | Record_remove | NA        | NM_001177550_2_-_1       |
| Bfar           | 0.608  | -1.506 | -3.174 | -0.404 | -1.655 | -3.985 | -2.545 | -1.512 | -1.802 | -4.961 | 67118         | BFAR      | NM_001177552_16_+_1      |

|                |        |        |        |        |        |        |        |        |        |        |               |           |                        |
|----------------|--------|--------|--------|--------|--------|--------|--------|--------|--------|--------|---------------|-----------|------------------------|
| Gng12          | 2.614  | 2.469  | 2.677  | 1.612  | -2.574 | -1.292 | 1.569  | 1.622  | 2.912  | 2.730  | 14701         | GNG12     | NM_001177556_6_+1      |
| Gng12          | 4.850  | 4.888  | 4.665  | 4.538  | -0.683 | -1.395 | 2.688  | 3.582  | 3.997  | 4.068  | 14701         | GNG12     | NM_001177557_6_+1      |
| Gng12          | 2.637  | 1.969  | 0.932  | 0.726  | -1.126 | -1.372 | -0.348 | 1.359  | 1.055  | 1.141  | 14701         | GNG12     | NM_001177558_6_+1      |
| Gng12          | 3.882  | 3.969  | 3.632  | 3.471  | -1.791 | -2.615 | 1.683  | 2.594  | 3.484  | 1.662  | 14701         | GNG12     | NM_001177559_6_+1      |
| Gng12          | 4.007  | 3.617  | 2.681  | 2.267  | -0.238 | -2.749 | 0.898  | 1.859  | 2.749  | 2.177  | 14701         | GNG12     | NM_001177560_6_+1      |
| Slc10a1        | -1.726 | -2.545 | -2.137 | -2.536 | -2.091 | -2.896 | -2.122 | -4.086 | -1.692 | -1.822 | 20493         | SLC10A1   | NM_001177561_12_-1     |
| Zfp970         | 2.789  | 3.333  | 0.713  | 2.362  | 1.485  | 3.150  | 1.207  | 1.771  | 1.849  | 2.512  | 628308        | ZNF442    | NM_001177568_2_+1      |
| Slc25a13       | 1.473  | 1.227  | 3.429  | 3.762  | 3.268  | 3.161  | 3.622  | 3.449  | 3.499  | 3.955  | 50799         | SLC25A13  | NM_001177572_6_-1      |
| Slc25a22       | 3.907  | 3.829  | 4.158  | 3.977  | 4.286  | 4.060  | 4.161  | 4.079  | 5.075  | 4.623  | 68267         | SLC25A22  | NM_001177576_7_-1      |
| Gm1045         | -4.981 | -4.981 | -4.961 | -4.587 | -4.962 | -4.243 | -4.425 | -3.423 | -4.981 | -4.981 | 381651        | C4orf26   | NM_001177577_5_+1      |
| Gm13308        | -4.588 | -3.988 | -4.691 | -4.710 | -4.972 | -4.972 | -4.965 | -4.957 | -3.533 | -4.513 | 621580        | NA        | NM_001177580_4_+1      |
| Gm13308        | -4.588 | -3.988 | -4.691 | -4.710 | -4.972 | -4.972 | -4.967 | -4.957 | -3.533 | -4.513 | 621580        | NA        | NM_001177580_dup1_4_+2 |
| Gm13308        | -4.588 | -3.988 | -4.691 | -4.710 | -4.972 | -4.972 | -4.967 | -4.957 | -3.533 | -4.513 | 621580        | NA        | NM_001177580_dup2_4_+3 |
| Slc8b1         | 1.422  | 0.171  | 2.850  | 1.900  | -0.432 | -1.049 | 1.100  | -0.523 | 2.749  | 1.494  | 170756        | SLC8B1    | NM_001177594_5_+1      |
| Slc8b1         | 3.187  | 2.283  | 5.768  | 5.546  | 2.460  | 2.427  | 3.476  | 3.583  | 5.031  | 4.436  | 170756        | SLC8B1    | NM_001177595_5_+1      |
| Record_removed | 0.155  | -0.182 | 6.848  | 7.398  | 7.258  | 7.773  | 4.240  | 5.011  | -3.592 | -1.398 | Record_remove | NA        | NM_001177600_1_+1      |
| 0610010K14Rik  | 4.264  | 3.867  | 3.201  | 3.115  | 3.622  | 3.616  | 3.526  | 3.459  | 2.670  | 2.185  | 104457        | C17orf49  | NM_001177601_11_-1     |
| Ak4            | -4.981 | -4.981 | -4.655 | -4.949 | -4.980 | -4.969 | -4.952 | -4.980 | -4.981 | -4.981 | 11639         | AK4       | NM_001177602_4_+1      |
| 0610010K14Rik  | 5.378  | 5.121  | 4.218  | 4.042  | 4.696  | 4.735  | 4.743  | 4.502  | 3.720  | 3.198  | 104457        | C17orf49  | NM_001177603_11_-1     |
| Ak4            | -4.981 | -4.981 | -3.930 | -4.951 | -4.980 | -4.980 | -4.821 | -4.975 | -4.981 | -4.981 | 11639         | AK4       | NM_001177604_4_+1      |
| Ak4            | -4.981 | -4.981 | -3.289 | -4.937 | -4.979 | -4.979 | -4.664 | -4.971 | -4.981 | -4.981 | 11639         | AK4       | NM_001177605_4_+1      |
| 0610010K14Rik  | 2.004  | 2.435  | 1.997  | 0.403  | 2.075  | 1.210  | 2.246  | 0.459  | 1.035  | 1.292  | 104457        | C17orf49  | NM_001177606_11_-1     |
| 0610010K14Rik  | 2.862  | 2.952  | 1.883  | 1.554  | 2.049  | 2.062  | 2.325  | 2.198  | 1.427  | 0.766  | 104457        | C17orf49  | NM_001177607_11_-1     |
| Ube2i          | 3.009  | 2.308  | 3.593  | 2.925  | 3.603  | 2.665  | 3.084  | 2.557  | 2.908  | 2.569  | 22196         | UBE2I     | NM_001177609_17_-1     |
| Ube2i          | 7.928  | 7.669  | 7.853  | 7.950  | 8.408  | 8.155  | 7.978  | 7.820  | 7.421  | 7.083  | 22196         | UBE2I     | NM_001177610_17_-1     |
| Arpp21         | -3.614 | -2.765 | -4.643 | -4.781 | -4.970 | -4.970 | -4.980 | -4.967 | -4.981 | -4.981 | 74100         | ARPP21    | NM_001177615_9_-1      |
| Arpp21         | -2.315 | -3.465 | -4.933 | -4.947 | -4.981 | -4.981 | -4.981 | -4.981 | -4.981 | -4.981 | 74100         | ARPP21    | NM_001177616_9_-1      |
| Arpp21         | -4.981 | -1.647 | -4.859 | -4.974 | -4.908 | -4.977 | -4.981 | -4.981 | -4.981 | -4.981 | 74100         | ARPP21    | NM_001177617_9_-1      |
| Arpp21         | -4.904 | -0.740 | -4.537 | -3.706 | -4.969 | -4.969 | -4.981 | -4.981 | -4.981 | -4.981 | 74100         | ARPP21    | NM_001177618_9_-1      |
| Arpp21         | -0.895 | -0.927 | -4.135 | -4.973 | -4.974 | -4.950 | -4.981 | -4.981 | -4.981 | -4.981 | 74100         | ARPP21    | NM_001177619_9_-1      |
| Arpp21         | -4.490 | -3.472 | -4.389 | -4.524 | -4.964 | -4.964 | -4.977 | -4.913 | -4.981 | -4.981 | 74100         | ARPP21    | NM_001177620_9_-1      |
| Slc5a6         | -0.966 | -4.017 | -1.672 | 0.317  | -2.021 | -3.830 | -0.078 | -1.869 | 0.621  | -1.824 | 330064        | SLC5A6    | NM_001177621_5_-1      |
| Slc5a6         | 0.586  | 1.762  | 0.674  | 1.137  | 0.481  | 1.171  | 0.573  | 1.314  | 0.161  | 1.632  | 330064        | SLC5A6    | NM_001177622_5_-1      |
| Arpp21         | -1.083 | -0.037 | -4.538 | -4.971 | -4.981 | -4.981 | -4.981 | -4.981 | -4.981 | -4.981 | 74100         | ARPP21    | NM_001177623_9_-1      |
| Ect2           | 0.367  | 1.045  | 1.531  | 0.441  | 0.962  | -0.956 | 1.276  | 0.242  | -0.854 | 0.540  | 13605         | ECT2      | NM_001177625_3_-1      |
| Ect2           | -1.817 | -1.162 | 0.736  | 1.656  | 2.285  | 2.107  | 1.753  | 1.677  | 0.926  | 0.613  | 13605         | ECT2      | NM_001177626_3_-1      |
| Slc2a6         | 0.721  | -1.086 | -4.657 | -1.864 | -1.365 | -1.195 | -1.080 | -0.758 | 0.879  | -0.082 | 227659        | SLC2A6    | NM_001177627_2_-1      |
| Slc45a3        | 0.813  | -1.478 | 0.108  | 0.452  | 1.364  | 1.043  | 0.987  | 1.869  | 0.507  | -0.586 | 212980        | SLC45A3   | NM_001177628_1_+1      |
| Grb10          | -4.981 | -4.981 | -4.566 | -3.209 | -3.569 | -4.734 | -4.908 | -4.297 | -4.981 | -3.011 | 14783         | GRB10     | NM_001177629_11_-1     |
| Etl4           | -4.981 | -2.400 | -3.879 | -4.033 | -4.909 | -3.630 | -4.965 | -4.503 | -4.323 | -3.607 | 208618        | KIAA1217  | NM_001177630_2_+1      |
| Etl4           | -4.981 | -4.981 | -4.907 | -3.834 | -4.977 | -4.761 | -4.945 | -4.380 | -4.981 | -0.269 | 208618        | KIAA1217  | NM_001177631_2_+1      |
| Fam149b        | 4.305  | 3.583  | 2.803  | 2.908  | 2.874  | 2.749  | 2.350  | 1.771  | 2.221  | 1.652  | 105428        | FAM149B1  | NM_001177633_14_+1     |
| Sirpa          | 5.019  | 2.354  | 0.476  | -4.555 | 5.867  | 2.599  | 6.052  | 2.969  | 7.004  | 4.157  | 19261         | SIRPA     | NM_001177647_2_+1      |
| Fnbp1          | -1.317 | -3.983 | 0.392  | -2.105 | -2.474 | -3.595 | -2.355 | -2.064 | -1.082 | -0.238 | 14269         | FNBP1     | NM_001177648_2_-1      |
| Fnbp1          | 2.321  | 2.414  | 5.571  | 5.526  | 2.649  | 2.616  | 1.861  | 3.064  | 3.539  | 3.723  | 14269         | FNBP1     | NM_001177649_2_-1      |
| Fnbp1          | -4.647 | -1.567 | 2.519  | 0.560  | -1.648 | -3.018 | -1.458 | -1.210 | 0.415  | 0.603  | 14269         | FNBP1     | NM_001177650_2_-1      |
| Hist1h2be      | -1.301 | 0.310  | 0.162  | -0.237 | -0.323 | -0.881 | -0.979 | -0.561 | -1.840 | -2.531 | 319179        | HIST1H2BF | NM_001177653_13_-1     |
| Nsmf           | -2.527 | -3.685 | -4.465 | -2.201 | -2.277 | -3.304 | -4.344 | -2.559 | -1.187 | -4.560 | 56876         | NSMF      | NM_001177654_2_+1      |
| Nsmf           | -2.565 | 0.306  | -0.307 | 0.142  | -0.619 | -1.092 | -1.000 | -3.059 | -3.977 | 0.399  | 56876         | NSMF      | NM_001177655_2_+1      |
| Grin1          | -4.407 | -3.935 | -4.475 | -4.343 | -4.936 | -4.862 | -4.883 | -4.973 | -4.981 | -4.981 | 14810         | GRIN1     | NM_001177656_2_-1      |
| Grin1          | -3.477 | -2.777 | -1.903 | -2.659 | -4.657 | -3.878 | -4.627 | -4.948 | -4.981 | -4.981 | 14810         | GRIN1     | NM_001177657_2_-1      |
| Mrpl15         | 6.191  | 5.749  | 5.475  | 5.370  | 5.365  | 5.175  | 5.216  | 5.115  | 4.597  | 3.979  | 27395         | MRPL15    | NM_001177658_1_-1      |
| Odf2           | 1.807  | 1.714  | 2.182  | -1.104 | 2.744  | 1.238  | 1.187  | 0.041  | 3.173  | 2.251  | 18286         | ODF2      | NM_001177659_2_+1      |
| Odf2           | 1.393  | 2.001  | 1.098  | 0.460  | 0.933  | 1.155  | 1.182  | 0.647  | 2.020  | 2.026  | 18286         | ODF2      | NM_001177661_2_+1      |
| Tmem267        | -1.265 | -4.981 | -2.857 | -4.974 | -4.727 | -3.845 | -4.952 | -4.967 | -4.626 | -4.878 | 633640        | TMEM267   | NM_001177666_13_+1     |
| Sptan1         | 3.539  | 3.305  | 3.975  | 4.254  | 4.173  | 3.998  | 4.680  | 5.014  | 5.928  | 6.175  | 20740         | SPTAN1    | NM_001177667_2_+1      |
| Sptan1         | 4.753  | 4.955  | 4.367  | 3.982  | 4.302  | 4.380  | 4.323  | 4.446  | 5.066  | 5.118  | 20740         | SPTAN1    | NM_001177668_2_+1      |
| Golph3l        | -4.177 | -2.782 | 0.236  | -2.476 | -0.479 | -1.584 | -3.482 | -1.817 | -1.013 | 1.449  | 229593        | GOLPH3L   | NM_001177669_3_+1      |
| Golph3l        | 0.260  | 0.502  | -0.564 | -1.111 | -0.892 | -2.327 | -0.735 | -1.374 | -1.884 | -4.628 | 229593        | GOLPH3L   | NM_001177670_3_+1      |
| Gpr68          | 0.861  | 0.240  | 1.796  | 1.620  | -0.210 | 0.324  | 2.266  | 0.505  | -0.724 | -0.595 | 238377        | GPR68     | NM_001177673_12_-1     |
| Gpr68          | -0.050 | -0.858 | 3.180  | 3.290  | 4.055  | 3.928  | 4.757  | 3.789  | -0.795 | -0.151 | 238377        | GPR68     | NM_001177674_12_-1     |
| Gal3st1        | -4.981 | -4.981 | -0.261 | -0.296 | 0.490  | 0.870  | -0.211 | -0.688 | -1.763 | -1.355 | 53897         | GAL3ST1   | NM_001177691_11_+1     |
| Ablim2         | -4.981 | -4.647 | -4.925 | -4.886 | -4.917 | -3.871 | -4.838 | -3.716 | -4.481 | -4.823 | 231148        | ABLIM2    | NM_001177696_5_+1      |
| Ablim2         | -4.981 | -4.272 | -4.791 | -4.829 | -4.907 | -4.960 | -4.654 | -4.905 | -4.861 | -4.981 | 231148        | ABLIM2    | NM_001177697_5_+1      |
| Ablim2         | -4.981 | -4.094 | -3.208 | -1.947 | -4.022 | -3.181 | -4.677 | -2.293 | -1.370 | -2.928 | 231148        | ABLIM2    | NM_001177698_5_+1      |
| Ablim2         | -4.981 | -4.067 | -4.729 | -4.592 | -4.466 | -4.937 | -4.518 | -3.930 | -4.773 | -2.923 | 231148        | ABLIM2    | NM_001177699_5_+1      |
| Ablim2         | -4.981 | -2.015 | -1.438 | -2.013 | -4.006 | -4.803 | -2.196 | -3.471 | -1.322 | -3.274 | 231148        | ABLIM2    | NM_001177700_5_+1      |
| Gal3st1        | -4.981 | -4.981 | -4.640 | -4.850 | -4.848 | -4.947 | -4.653 | -4.918 | -4.649 | -4.856 | 53897         | GAL3ST1   | NM_001177703_11_+1     |
| Homez          | 2.246  | 2.186  | 2.357  | 2.862  | 2.168  | 2.552  | 2.022  | 2.222  | 3.633  | 2.844  | 239099        | HOMEZ     | NM_001177705_14_-1     |
| Arfgap1        | 1.177  | 1.359  | 1.933  | 1.605  | 1.581  | 0.781  | 0.852  | 1.047  | 2.233  | 1.186  | 228998        | ARFGAP1   | NM_001177706_2_+1      |
| Arfgap1        | 0.257  | 1.058  | 0.273  | -0.160 | -0.382 | 0.392  | 0.316  | -0.137 | 2.596  | 1.334  | 228998        | ARFGAP1   | NM_001177707_2_+1      |
| Arfgap1        | 1.729  | -0.279 | 1.499  | -0.694 | 1.932  | -1.945 | 1.623  | -2.303 | 2.596  | -0.329 | 228998        | ARFGAP1   | NM_001177708_2_+1      |
| Arfgap1        | -2.439 | -4.058 | -4.338 | -4.588 | -4.772 | -4.849 | -3.010 | -4.616 | -4.482 | -4.895 | 228998        | ARFGAP1   | NM_001177709_2_+1      |
| Arfgap1        | 3.201  | 1.264  | 3.435  | 0.267  | 3.392  | 1.398  | 2.243  | 1.071  | 2.348  | -0.374 | 228998        | ARFGAP1   | NM_001177710_2_+1      |

|         |        |        |        |        |        |        |        |        |        |        |           |         |                    |
|---------|--------|--------|--------|--------|--------|--------|--------|--------|--------|--------|-----------|---------|--------------------|
| Cyp26b1 | -4.981 | -1.925 | -2.065 | -3.655 | -4.974 | -4.842 | -4.981 | -4.981 | -3.493 | -4.981 | 232174    | CYP26B1 | NM_001177713_6_-1  |
| Gm2897  | -1.274 | 1.398  | -1.398 | -1.219 | -4.920 | 1.951  | -4.983 | -3.194 | -4.981 | -4.958 | 100040671 | NA      | NM_001177715_14_+1 |
| Madd    | -2.413 | 0.334  | 0.202  | -0.118 | 0.919  | 1.278  | 1.380  | 1.357  | 2.683  | 3.289  | 228355    | MADD    | NM_001177719_2_-1  |
| Madd    | 3.579  | 3.941  | 4.576  | 4.526  | 5.108  | 4.768  | 5.054  | 5.466  | 5.874  | 6.403  | 228355    | MADD    | NM_001177720_2_-1  |
| Nr1h3   | 3.026  | -0.015 | 1.363  | 1.575  | 2.470  | 1.353  | 4.375  | 5.032  | 2.630  | 3.764  | 22259     | NR1H3   | NM_001177730_2_-1  |
| Mrap2   | -4.981 | -4.981 | -4.966 | -4.971 | -4.953 | -4.968 | -4.975 | -4.970 | -4.981 | -4.981 | 244958    | MRAP2   | NM_001177731_9_+1  |
| Gm10767 | 0.603  | 0.636  | 1.270  | -1.622 | -0.763 | -1.075 | -1.376 | -1.703 | -2.197 | -2.751 | 100038538 | NA      | NM_001177750_13_+1 |
| Tsc22d1 | -1.699 | -4.289 | -2.059 | -3.470 | -4.085 | -4.970 | -3.373 | -4.732 | -4.543 | -4.926 | 21807     | TSC22D1 | NM_001177751_14_+1 |
| Pfkfb3  | 0.920  | 0.396  | 6.010  | 5.553  | 5.137  | 5.096  | 5.404  | 4.006  | 3.271  | 1.588  | 170768    | PFKFB3  | NM_001177752_2_-1  |
| Pfkfb3  | -4.258 | -4.209 | -3.349 | -3.702 | -3.965 | -4.734 | -3.970 | -4.516 | -3.882 | -3.756 | 170768    | PFKFB3  | NM_001177753_2_-1  |
| Pfkfb3  | -3.878 | -3.689 | -0.191 | -0.954 | 1.110  | -3.422 | -0.106 | -3.066 | -2.043 | -2.188 | 170768    | PFKFB3  | NM_001177754_2_-1  |
| Pfkfb3  | 0.160  | -4.003 | 3.713  | 4.086  | 3.384  | 2.600  | 2.828  | 2.242  | 2.099  | 2.395  | 170768    | PFKFB3  | NM_001177755_2_-1  |
| Pfkfb3  | -4.111 | -4.087 | -1.070 | -1.589 | -1.862 | -4.321 | -1.745 | -3.626 | -3.274 | -1.808 | 170768    | PFKFB3  | NM_001177756_2_-1  |
| Pfkfb3  | -4.098 | -3.901 | -3.271 | -3.335 | -3.178 | -4.605 | -3.306 | -4.376 | -3.583 | -3.845 | 170768    | PFKFB3  | NM_001177757_2_-1  |
| Pfkfb3  | 1.172  | 2.245  | 1.661  | 1.535  | 1.532  | 1.632  | 2.076  | 1.541  | 1.672  | 1.334  | 170768    | PFKFB3  | NM_001177758_2_-1  |
| Tnfaip8 | 6.636  | 5.860  | 5.607  | 5.581  | 6.772  | 6.607  | 6.211  | 5.506  | 4.160  | 4.128  | 106869    | TNFAIP8 | NM_001177759_18_+1 |
| Tnfaip8 | 2.060  | 0.786  | 0.913  | -1.257 | 1.170  | -0.605 | 0.985  | -1.717 | 0.343  | -1.534 | 106869    | TNFAIP8 | NM_001177760_18_+1 |
| Rex2    | -4.981 | -0.394 | -4.944 | -0.959 | -4.916 | -1.811 | -4.630 | -2.343 | -4.981 | 0.201  | 100043034 | ZNF616  | NM_001177767_4_+1  |
| Clcc1   | 1.728  | 1.832  | 1.579  | 0.978  | 1.240  | 0.875  | 1.241  | 1.260  | 1.613  | 2.008  | 229725    | CLCC1   | NM_001177770_3_+1  |
| Clcc1   | 0.206  | 0.718  | 0.060  | -0.014 | -0.106 | -1.234 | -0.283 | 0.707  | 1.187  | 0.637  | 229725    | CLCC1   | NM_001177771_3_+1  |
| Fbxw7   | 4.264  | 4.292  | 3.986  | 4.117  | 3.923  | 4.132  | 3.566  | 3.249  | 3.680  | 3.872  | 50754     | FBXW7   | NM_001177773_3_+1  |
| Fbxw7   | 1.626  | 0.099  | 0.271  | -0.739 | 0.588  | -1.174 | -0.051 | -0.803 | -0.645 | -0.810 | 50754     | FBXW7   | NM_001177774_3_+1  |
| H60b    | -3.189 | -0.839 | 0.002  | 1.967  | -0.005 | 1.229  | -0.662 | 0.781  | -0.544 | 1.461  | 667281    | NA      | NM_001177775_10_+1 |
| Ahi1    | 3.590  | 1.413  | -4.882 | -3.708 | -4.981 | -4.981 | -4.972 | -4.980 | -4.981 | -4.967 | 52906     | AHI1    | NM_001177776_10_+1 |
| Dlg3    | -4.981 | -4.981 | -4.981 | -4.981 | -4.980 | -4.980 | -3.830 | -4.826 | -3.783 | -4.457 | 53310     | DLG3    | NM_001177778_X_+1  |
| Dlg3    | 0.176  | 1.023  | -0.679 | -0.651 | -0.012 | -0.006 | -1.924 | -0.160 | 1.089  | 1.885  | 53310     | DLG3    | NM_001177779_X_+1  |
| Dlg3    | 0.224  | 0.933  | -0.813 | -0.623 | -2.826 | -1.295 | -0.622 | -2.066 | -0.344 | -2.508 | 53310     | DLG3    | NM_001177780_X_+1  |
| Gpr174  | 4.144  | 4.921  | -2.396 | -3.129 | -3.643 | 0.100  | -0.694 | 0.705  | -4.981 | -3.855 | 213439    | GPR174  | NM_001177781_X_+1  |
| Gpr174  | 2.047  | 3.726  | -4.941 | -1.382 | -3.530 | -2.261 | -1.141 | 0.375  | -3.925 | -4.981 | 213439    | GPR174  | NM_001177782_X_+1  |
| Dis3l   | -2.631 | -1.935 | 0.520  | -0.055 | -0.162 | -0.742 | -0.669 | 0.296  | 1.275  | 0.660  | 213550    | DIS3L   | NM_001177784_9_-1  |
| Cd44    | 0.891  | 1.068  | -0.232 | 0.066  | -1.780 | -1.092 | -1.425 | -2.150 | 1.510  | 2.043  | 12505     | CD44    | NM_001177785_2_-1  |
| Cd44    | -0.312 | 1.799  | 0.226  | 0.470  | -2.232 | -4.518 | -2.544 | 0.768  | -3.129 | 1.778  | 12505     | CD44    | NM_001177786_2_-1  |
| Cd44    | -2.004 | 2.376  | 2.846  | 2.308  | -0.937 | -0.928 | 1.339  | 2.218  | 3.317  | 3.897  | 12505     | CD44    | NM_001177787_2_-1  |
| Snap23  | -1.660 | -4.536 | -2.565 | -2.111 | -3.561 | -1.338 | -1.194 | -1.899 | -1.203 | -4.878 | 20619     | SNAP23  | NM_001177792_2_+1  |
| Snap23  | 3.252  | 1.858  | 3.473  | 3.432  | 2.825  | 1.938  | 3.338  | 2.881  | 2.832  | 3.631  | 20619     | SNAP23  | NM_001177793_2_+1  |
| Rgs20   | -4.981 | -4.981 | -4.981 | -4.981 | -4.981 | -4.981 | -4.981 | -4.981 | -4.981 | -4.981 | 58175     | RGS20   | NM_001177795_1_-1  |
| Afap112 | -3.602 | -4.981 | -4.896 | -4.979 | -4.981 | -4.977 | -4.846 | -4.980 | -4.981 | -4.981 | 226250    | AFAP112 | NM_001177796_19_-1 |
| Afap112 | -1.669 | -4.981 | -4.695 | -4.882 | -4.971 | -4.885 | -4.026 | -4.959 | -4.981 | -4.981 | 226250    | AFAP112 | NM_001177797_19_-1 |
| Taf6l   | -0.244 | 0.168  | -0.862 | -1.686 | -2.838 | -1.508 | -1.428 | -2.102 | -2.785 | -1.776 | 225895    | TAFL6L  | NM_001177798_19_-1 |
| Capn3   | -4.525 | -4.981 | -4.762 | -3.587 | -3.377 | -4.938 | -4.066 | -4.959 | -4.728 | -2.867 | 12335     | CAPN3   | NM_001177799_2_+1  |
| Sirt3   | 3.055  | 3.080  | 1.585  | 1.567  | 1.937  | 1.580  | 1.514  | 1.660  | 1.652  | 1.749  | 64384     | SIRT3   | NM_001177804_7_-1  |
| Eif2ak4 | -2.152 | -0.487 | 0.500  | -0.211 | 0.784  | -0.119 | 0.728  | -0.587 | 1.943  | -1.974 | 27103     | EIF2AK4 | NM_001177806_2_+1  |
| Rapgef3 | -4.364 | -3.909 | -4.915 | -4.077 | -4.508 | -3.363 | -2.234 | -0.016 | -2.989 | -4.981 | 223864    | RAPGEF3 | NM_001177810_15_-1 |
| Rapgef3 | -3.537 | -3.439 | -4.959 | -3.126 | -3.593 | -3.814 | -2.474 | -3.715 | -4.981 | -4.981 | 223864    | RAPGEF3 | NM_001177811_15_-1 |
| Wbp1l   | 3.580  | 4.185  | 4.860  | 5.208  | 4.448  | 4.117  | 4.893  | 4.953  | 5.819  | 6.039  | 226178    | WBP1L   | NM_001177812_19_+1 |
| Wbp1l   | 2.930  | 2.514  | 0.149  | 1.137  | 0.756  | 1.428  | 1.477  | 0.373  | 0.635  | 0.721  | 226178    | WBP1L   | NM_001177813_19_+1 |
| Smox    | 2.507  | 2.536  | 1.432  | 2.082  | 0.316  | 2.663  | 1.860  | 2.097  | 3.541  | 3.442  | 228608    | SMOX    | NM_001177833_2_+1  |
| Smox    | -4.797 | -4.197 | -4.169 | -3.624 | -4.908 | -3.979 | -4.323 | -3.667 | -1.489 | -1.330 | 228608    | SMOX    | NM_001177834_2_+1  |
| Smox    | 0.541  | 0.707  | -0.824 | 0.326  | -1.921 | -0.607 | -1.541 | -0.172 | 1.903  | 1.283  | 228608    | SMOX    | NM_001177835_2_+1  |
| Smox    | -0.260 | 1.445  | -1.897 | -0.018 | -2.789 | 0.014  | -0.058 | -0.369 | 0.282  | 0.297  | 228608    | SMOX    | NM_001177836_2_+1  |
| Smox    | -1.067 | -4.510 | -4.446 | -3.548 | -4.846 | -4.936 | -3.623 | -4.635 | -4.756 | -2.129 | 228608    | SMOX    | NM_001177837_2_+1  |
| Smox    | -0.157 | 0.342  | -3.147 | -1.600 | -1.502 | 0.773  | -1.247 | 0.770  | 1.818  | 1.117  | 228608    | SMOX    | NM_001177838_2_+1  |
| Smox    | 0.554  | 0.430  | -1.014 | -0.371 | -0.892 | 0.123  | 0.427  | -1.741 | 0.371  | 0.602  | 228608    | SMOX    | NM_001177839_2_+1  |
| Smox    | -0.079 | -4.981 | -2.487 | -2.477 | -4.940 | -1.867 | -3.327 | -2.236 | -0.931 | -3.286 | 228608    | SMOX    | NM_001177840_2_+1  |
| Otub2   | -4.779 | -4.710 | -4.849 | -4.951 | -3.430 | -4.963 | -4.124 | -4.971 | -4.804 | -4.952 | 68149     | OTUB2   | NM_001177841_12_+1 |
| Frmd4a  | 1.296  | 2.282  | 3.094  | 2.638  | 1.030  | -1.636 | 0.582  | -0.255 | -1.056 | 0.556  | 209630    | FRMD4A  | NM_001177843_2_+1  |
| Frmd4a  | 5.132  | 5.002  | 3.977  | 3.174  | 3.124  | 2.836  | 4.363  | 4.064  | 5.342  | 5.055  | 209630    | FRMD4A  | NM_001177844_2_+1  |
| Tirap   | -0.432 | -2.162 | -0.594 | -1.952 | -3.078 | -2.632 | -1.143 | -1.183 | -0.090 | -0.764 | 117149    | TIRAP   | NM_001177845_9_-1  |
| Tirap   | 0.555  | -1.637 | 3.078  | 2.651  | 1.084  | 1.869  | 1.987  | 2.383  | 4.247  | 4.207  | 117149    | TIRAP   | NM_001177846_9_-1  |
| Tirap   | 1.770  | 1.374  | 1.814  | 2.155  | 1.233  | 0.634  | 1.023  | 1.500  | 1.164  | 2.476  | 117149    | TIRAP   | NM_001177847_9_-1  |
| Asph    | 2.495  | 3.568  | 2.726  | 2.650  | -1.129 | 0.481  | 2.247  | 2.850  | 4.826  | 4.782  | 65973     | ASPH    | NM_001177849_4_-1  |
| Asph    | 1.053  | 3.248  | 0.601  | 0.009  | -0.916 | -1.449 | -0.428 | -0.110 | 2.594  | 1.260  | 65973     | ASPH    | NM_001177850_4_-1  |
| Asph    | 5.518  | 5.436  | 2.638  | 2.799  | 0.700  | 0.948  | 2.115  | 2.880  | 3.595  | 4.266  | 65973     | ASPH    | NM_001177851_4_-1  |
| Asph    | 3.630  | 3.654  | -2.113 | -1.981 | -3.624 | -2.933 | -2.332 | -1.726 | -1.185 | 0.138  | 65973     | ASPH    | NM_001177852_4_-1  |
| Asph    | -0.133 | -0.040 | -3.249 | -1.830 | -4.944 | -4.232 | -3.124 | -3.715 | 0.780  | 0.767  | 65973     | ASPH    | NM_001177853_4_-1  |
| Asph    | -4.021 | -3.251 | -4.901 | -4.946 | -4.941 | -4.969 | -3.480 | -4.906 | -4.762 | -4.870 | 65973     | ASPH    | NM_001177854_4_-1  |
| Asph    | -3.448 | -1.688 | -2.187 | -2.966 | -4.244 | -2.870 | -3.031 | -3.816 | -1.246 | -1.729 | 65973     | ASPH    | NM_001177855_4_-1  |
| Asph    | 0.271  | 0.521  | 0.908  | 0.815  | 0.788  | 1.609  | 0.916  | 0.766  | 0.976  | 1.590  | 65973     | ASPH    | NM_001177856_4_-1  |
| Trim43c | -4.981 | -4.981 | -3.793 | -3.830 | -3.344 | -4.730 | -2.371 | -4.956 | -3.565 | -4.227 | 666731    | NA      | NM_001177858_9_+1  |
| Sgol2a  | -2.130 | -4.981 | -4.974 | -4.882 | -4.931 | -4.964 | -1.704 | -2.559 | -0.553 | -4.949 | 68549     | SGO2    | NM_001177867_1_+1  |
| Rreb1   | -3.408 | 2.298  | -1.564 | 0.765  | -1.990 | 0.762  | -2.925 | 0.532  | 0.967  | 0.842  | 68750     | RREB1   | NM_001177868_13_+1 |
| Rreb1   | 1.297  | -0.120 | 2.103  | 2.983  | 1.234  | 2.431  | 1.942  | 2.365  | 4.744  | 5.170  | 68750     | RREB1   | NM_001177869_13_+1 |
| Filip1l | 7.103  | 7.566  | 7.510  | 7.466  | 8.922  | 8.914  | 8.409  | 8.303  | 7.800  | 8.318  | 78749     | FILIP1L | NM_001177871_16_+1 |
| Trim15  | -4.981 | -4.981 | -4.604 | -4.639 | -4.458 | -4.915 | -3.570 | -4.011 | -4.981 | -3.321 | 69097     | TRIM15  | NM_001177872_17_-1 |

|               |        |        |        |        |        |        |        |        |        |        |        |         |                     |
|---------------|--------|--------|--------|--------|--------|--------|--------|--------|--------|--------|--------|---------|---------------------|
| Gps1          | 6.851  | 7.035  | 6.793  | 6.726  | 6.836  | 6.750  | 6.600  | 6.519  | 6.277  | 6.110  | 209318 | GPS1    | NM_001177874_11_+_1 |
| Phka2         | -2.091 | -1.359 | 1.880  | 0.967  | 0.469  | 0.337  | 1.263  | 1.295  | 2.396  | 2.586  | 110094 | PHKA2   | NM_001177878_X_+_1  |
| Phka2         | 1.857  | 2.829  | 3.818  | 3.473  | 1.340  | 1.073  | 2.544  | 2.914  | 4.344  | 4.228  | 110094 | PHKA2   | NM_001177879_X_+_1  |
| Mfap3l        | -4.703 | -4.015 | -4.930 | -4.982 | -4.980 | -4.980 | -4.913 | -4.945 | -4.203 | -4.773 | 71306  | MFAP3L  | NM_001177881_8_+_1  |
| Mfap3l        | -4.442 | -0.543 | -3.318 | -4.908 | -4.937 | -4.927 | -4.677 | -2.805 | -0.342 | -4.257 | 71306  | MFAP3L  | NM_001177882_8_+_1  |
| Whsc1         | 2.933  | 3.680  | 3.446  | 3.306  | 3.619  | 3.105  | 3.199  | 2.864  | 1.924  | 2.547  | 107823 | WHSC1   | NM_001177884_5_+_1  |
| Cacna1g       | -4.981 | -4.981 | -4.960 | -3.697 | -4.155 | -3.439 | -4.903 | -4.248 | -4.981 | -4.981 | 12291  | CACNA1G | NM_001177888_11_-_1 |
| Cacna1g       | -4.981 | -4.981 | -4.933 | -3.466 | -3.056 | -1.453 | -4.883 | -2.677 | -4.981 | -4.981 | 12291  | CACNA1G | NM_001177890_11_-_1 |
| 9830107B12Rik | 3.952  | 5.431  | -4.709 | 3.325  | -4.639 | 2.208  | -4.542 | 3.643  | 1.651  | 5.274  | 328829 | NA      | NM_001177896_17_-_1 |
| 9830107B12Rik | -0.746 | 1.338  | -4.868 | 0.343  | -4.368 | -0.977 | -4.906 | 2.434  | -4.795 | 3.917  | 328829 | NA      | NM_001177897_17_-_1 |
| Skap1         | -4.916 | -1.782 | -1.682 | -4.958 | -1.756 | -2.815 | -3.722 | -3.392 | -1.761 | -2.189 | 78473  | SKAP1   | NM_001177898_11_+_1 |
| Skap1         | 0.302  | -0.695 | -2.747 | 0.726  | -1.501 | 1.842  | 0.983  | 2.912  | -1.379 | -0.092 | 78473  | SKAP1   | NM_001177899_11_+_1 |
| Rd3           | -0.676 | -1.877 | -2.000 | -3.850 | -4.670 | -3.717 | -4.658 | -3.672 | -2.664 | -3.964 | 74023  | RD3     | NM_001177900_1_+_1  |
| Zfp513        | 3.838  | 2.548  | 4.049  | 4.098  | 3.620  | 3.652  | 3.165  | 3.633  | 3.603  | 3.546  | 101023 | ZNF513  | NM_001177901_5_-_1  |
| Zfp518b       | 1.182  | 1.303  | 1.519  | 1.658  | 1.152  | 1.477  | 1.018  | 0.996  | 1.183  | 1.932  | 100515 | ZNF518B | NM_001177902_5_-_1  |
| Eda           | -3.145 | -2.702 | -1.205 | -1.201 | -4.483 | -4.869 | -4.980 | -4.863 | -4.981 | -4.530 | 13607  | NA      | NM_001177937_X_+_1  |
| Eda           | -3.671 | -2.662 | -1.767 | -3.670 | -4.884 | -4.828 | -4.980 | -4.853 | -4.981 | -4.522 | 13607  | NA      | NM_001177938_X_+_1  |
| Eda           | -3.056 | -2.610 | -1.477 | -3.538 | -4.884 | -4.729 | -4.981 | -4.829 | -4.981 | -4.502 | 13607  | NA      | NM_001177939_X_+_1  |
| Eda           | -3.550 | -2.381 | -3.133 | -3.279 | -4.084 | -4.687 | -4.973 | -4.678 | -4.981 | -4.455 | 13607  | NA      | NM_001177940_X_+_1  |
| Eda           | -2.407 | -2.044 | -4.708 | -2.539 | -4.881 | -4.186 | -4.977 | -4.408 | -4.981 | -4.048 | 13607  | NA      | NM_001177941_X_+_1  |
| Eda           | -3.373 | -1.918 | -1.895 | -2.239 | -4.875 | -3.392 | -4.976 | -4.398 | -4.981 | -4.010 | 13607  | NA      | NM_001177942_X_+_1  |
| Eda           | -4.386 | -3.919 | -4.267 | -4.722 | -4.945 | -4.956 | -4.974 | -4.967 | -4.981 | -4.838 | 13607  | NA      | NM_001177943_X_+_1  |
| Eda           | -4.350 | -3.853 | -4.185 | -4.690 | -4.938 | -4.954 | -4.974 | -4.966 | -4.981 | -4.819 | 13607  | NA      | NM_001177944_X_+_1  |
| Aamdc         | 4.245  | 3.881  | 1.532  | 1.440  | 2.697  | 2.791  | 2.553  | 1.907  | 2.059  | 1.301  | 66273  | AAMDC   | NM_001177945_7_-_1  |
| Aamdc         | 2.654  | 2.678  | 1.054  | 0.053  | 0.287  | -0.083 | 0.740  | 0.304  | -0.164 | 0.730  | 66273  | AAMDC   | NM_001177946_7_-_1  |
| Aamdc         | 0.934  | 1.034  | -0.635 | -0.524 | 1.111  | 0.105  | 0.705  | -1.132 | 1.278  | -2.305 | 66273  | AAMDC   | NM_001177947_7_-_1  |
| Rpgr          | 1.154  | -0.058 | -0.987 | -4.422 | 0.326  | -0.364 | -1.442 | -1.360 | -3.487 | -0.677 | 19893  | RPGR    | NM_001177950_X_-_1  |
| Rpgr          | -4.981 | -4.981 | -4.937 | -3.335 | -4.852 | -4.966 | -4.938 | -4.960 | -4.562 | -4.793 | 19893  | RPGR    | NM_001177951_X_-_1  |
| Rpgr          | -0.798 | -0.246 | -4.056 | -0.590 | 0.013  | -1.391 | -1.897 | 0.148  | -4.654 | -1.570 | 19893  | RPGR    | NM_001177952_X_-_1  |
| Rpgr          | -4.981 | -4.981 | -2.824 | -3.891 | -4.522 | -3.780 | -4.774 | -4.951 | -4.981 | -4.981 | 19893  | RPGR    | NM_001177953_X_-_1  |
| Rpgr          | -2.078 | -4.981 | -4.087 | -4.845 | -4.670 | -4.680 | -4.973 | -2.825 | -4.981 | -4.981 | 19893  | RPGR    | NM_001177954_X_-_1  |
| Gpm6b         | -3.715 | -2.971 | -4.765 | -4.969 | -4.353 | -4.825 | -4.891 | -4.847 | -4.976 | -4.981 | 14758  | GPM6B   | NM_001177955_X_+_1  |
| Gpm6b         | 1.125  | 0.769  | -3.447 | -4.876 | 0.209  | -0.116 | -4.601 | -3.000 | -4.981 | -4.934 | 14758  | GPM6B   | NM_001177956_X_+_1  |
| Gpm6b         | -3.252 | -3.012 | -4.953 | -4.976 | -4.047 | -4.646 | -4.941 | -4.977 | -4.978 | -4.981 | 14758  | GPM6B   | NM_001177957_X_+_1  |
| Gpm6b         | -4.817 | -4.635 | -4.939 | -4.977 | -4.965 | -4.973 | -4.192 | -4.923 | -4.970 | -4.981 | 14758  | GPM6B   | NM_001177958_X_+_1  |
| Gpm6b         | -4.483 | -4.248 | -1.107 | -2.153 | -4.893 | -3.812 | -2.207 | -3.498 | -4.981 | -4.883 | 14758  | GPM6B   | NM_001177959_X_+_1  |
| Gpm6b         | -4.784 | -4.626 | -4.901 | -4.952 | -4.962 | -4.970 | -4.410 | -4.901 | -4.975 | -4.981 | 14758  | GPM6B   | NM_001177960_X_+_1  |
| Gpm6b         | 6.737  | 6.194  | 2.973  | 3.242  | 5.871  | 6.673  | 3.570  | 3.303  | -4.981 | -1.330 | 14758  | GPM6B   | NM_001177961_X_+_1  |
| Gpm6b         | 2.848  | 1.245  | -0.340 | 0.305  | 3.278  | 4.042  | -1.083 | 0.562  | -4.858 | -4.981 | 14758  | GPM6B   | NM_001177962_X_+_1  |
| Dcdc2c        | -0.511 | -0.056 | 0.357  | -1.091 | 0.347  | -0.193 | -0.391 | -1.326 | -0.289 | -0.967 | 68511  | DCDC2C  | NM_001177964_12_-_1 |
| Naa10         | 5.961  | 5.639  | 5.221  | 5.392  | 5.444  | 5.443  | 5.300  | 5.419  | 4.763  | 4.367  | 56292  | NAA10   | NM_001177965_X_-_1  |
| Lclat1        | 2.907  | 2.069  | 1.856  | 1.645  | 2.880  | 2.607  | 1.738  | 1.532  | 2.655  | 2.100  | 225010 | LCLAT1  | NM_001177967_17_+_1 |
| Lclat1        | 1.831  | 0.647  | 1.577  | 1.132  | 0.735  | 0.498  | -0.376 | -1.137 | -2.310 | -0.212 | 225010 | LCLAT1  | NM_001177968_17_+_1 |
| Irak1         | 2.110  | 2.228  | 2.349  | 3.103  | 2.733  | 2.387  | 2.486  | 2.821  | 2.588  | 3.054  | 16179  | IRAK1   | NM_001177973_X_-_1  |
| Irak1         | -0.207 | -1.795 | 0.405  | 0.304  | 0.463  | 0.497  | -0.025 | -0.508 | 2.091  | 1.725  | 16179  | IRAK1   | NM_001177974_X_-_1  |
| Irak1         | 5.959  | 6.157  | 6.929  | 6.788  | 6.960  | 7.046  | 6.818  | 6.830  | 6.907  | 6.650  | 16179  | IRAK1   | NM_001177975_X_-_1  |
| Irak1         | -2.948 | -1.050 | -3.835 | -2.066 | -3.051 | -2.777 | -2.700 | -0.603 | 1.660  | -0.606 | 16179  | IRAK1   | NM_001177976_X_-_1  |
| Pde4b         | 5.612  | 5.102  | 7.450  | 7.324  | 8.078  | 7.927  | 7.788  | 7.393  | 6.717  | 6.756  | 18578  | PDE4B   | NM_001177980_4_+_1  |
| Pde4b         | -4.927 | -4.804 | 0.489  | -0.586 | -0.814 | -1.214 | -1.078 | -0.900 | -0.349 | -0.156 | 18578  | PDE4B   | NM_001177981_4_+_1  |
| Pde4b         | -4.849 | -4.392 | -2.650 | -3.096 | -3.408 | -4.569 | -1.620 | -3.489 | -4.038 | 0.672  | 18578  | PDE4B   | NM_001177982_4_+_1  |
| Zmym3         | 1.785  | -0.115 | 0.682  | 0.995  | 1.307  | 1.318  | -0.374 | 0.988  | -1.510 | -0.548 | 56364  | ZMYM3   | NM_001177985_X_-_1  |
| Zmym3         | 2.758  | 2.982  | 2.349  | 2.217  | 2.451  | 2.720  | 2.358  | 2.201  | 2.894  | 2.344  | 56364  | ZMYM3   | NM_001177986_X_-_1  |
| Zmym3         | -0.159 | 1.073  | -0.556 | -4.597 | -4.588 | -4.591 | -2.308 | -3.692 | -2.544 | -3.894 | 56364  | ZMYM3   | NM_001177987_X_-_1  |
| Zmym3         | 2.272  | 1.844  | 0.990  | -0.104 | 1.427  | 0.887  | 0.710  | 0.739  | 1.099  | 0.330  | 56364  | ZMYM3   | NM_001177988_X_-_1  |
| Prdm16        | -3.538 | -4.981 | -1.103 | -3.366 | -0.862 | 0.400  | -1.307 | -1.883 | -0.274 | -2.109 | 70673  | PRDM16  | NM_001177995_4_-_1  |
| Sfxn3         | -1.835 | 0.201  | -1.728 | -0.802 | -3.612 | -2.124 | -0.199 | -1.312 | -0.027 | 1.025  | 94280  | SFXN3   | NM_001178012_19_+_1 |
| Sfxn3         | -4.486 | 1.111  | -0.488 | 0.687  | -2.010 | -0.890 | -2.002 | 0.853  | 0.705  | 2.043  | 94280  | SFXN3   | NM_001178013_19_+_1 |
| Mitf          | -2.614 | -3.837 | -4.383 | -4.878 | -4.834 | -4.899 | -4.634 | -4.165 | -4.705 | -4.756 | 17342  | MITF    | NM_001178049_6_+_1  |
| Txnrd3        | -0.260 | 0.769  | 0.119  | 0.218  | -1.329 | -1.675 | -0.762 | -0.268 | 0.235  | 0.628  | 232223 | TXNRD3  | NM_001178058_6_+_1  |
| Txnrd3        | -4.729 | -4.485 | -4.419 | -3.481 | -4.234 | -2.389 | -2.424 | -2.240 | -4.558 | -4.792 | 232223 | TXNRD3  | NM_001178059_6_+_1  |
| Txnrd3        | -4.729 | -4.485 | -4.419 | -3.481 | -4.234 | -2.389 | -2.424 | -2.240 | -4.558 | -4.792 | 232223 | TXNRD3  | NM_001178060_6_+_1  |
| Tfdp2         | 2.566  | 3.269  | 3.601  | 3.314  | 2.617  | 3.346  | 2.859  | 3.176  | 2.805  | 3.093  | 211586 | TFDP2   | NM_001184706_9_+_1  |
| Tfdp2         | -4.770 | -4.434 | -4.838 | -4.939 | -4.931 | -4.978 | -2.855 | -4.948 | -4.462 | -4.632 | 211586 | TFDP2   | NM_001184708_9_+_1  |
| Tfdp2         | -4.889 | -3.792 | -4.777 | -3.440 | -4.924 | -2.794 | -4.713 | -2.529 | -1.211 | -4.692 | 211586 | TFDP2   | NM_001184709_9_+_1  |
| Tfdp2         | -4.876 | -4.382 | -4.910 | -4.917 | -4.884 | -4.892 | -4.710 | -4.941 | -3.670 | -4.623 | 211586 | TFDP2   | NM_001184710_9_+_1  |
| Tfdp2         | -0.124 | 1.013  | 0.905  | 1.612  | 0.743  | 0.674  | 0.554  | 0.749  | 0.713  | 1.136  | 211586 | TFDP2   | NM_001184711_9_+_1  |
| Wnk1          | 6.083  | 6.134  | 6.115  | 6.050  | 6.815  | 6.684  | 5.975  | 5.664  | 4.361  | 4.655  | 232341 | WNK1    | NM_001185020_6_-_1  |
| Wnk1          | 2.408  | 3.463  | 2.146  | 3.239  | 2.642  | 2.454  | 2.828  | -0.020 | 1.436  | -0.243 | 232341 | WNK1    | NM_001185021_6_-_1  |
| Zpbp          | -3.916 | -1.921 | -4.709 | -4.830 | -2.184 | -4.874 | -4.715 | -4.552 | -4.776 | -4.964 | 53604  | ZBPB    | NM_001185153_11_-_1 |
| Wdr53         | 3.755  | 3.590  | 3.464  | 3.336  | 3.410  | 3.109  | 3.190  | 2.813  | 3.118  | 3.010  | 68980  | WDR53   | NM_001185162_16_+_1 |
| Vegfb         | 2.930  | 3.327  | 2.368  | 2.545  | 1.594  | 1.248  | 1.244  | 1.256  | -0.227 | -1.000 | 22340  | VEGFB   | NM_001185164_19_-_1 |
| Pfdn6         | -0.968 | -0.023 | -0.995 | -0.747 | -2.247 | -3.054 | -0.709 | -1.481 | -2.068 | -1.373 | 14976  | PFDN6   | NM_001185182_17_-_1 |
| Snx7          | -1.867 | 0.421  | -1.810 | -0.659 | -2.396 | -0.601 | -1.440 | -1.339 | -1.718 | -0.206 | 76561  | SNX7    | NM_001190156_3_-_1  |
| Psrc1         | 1.608  | 1.142  | 0.199  | -0.174 | 1.528  | 1.118  | 0.815  | -0.816 | -0.658 | -0.527 | 56742  | PSRC1   | NM_001190161_3_+_1  |

|          |        |        |        |        |        |        |        |        |        |        |           |             |                     |
|----------|--------|--------|--------|--------|--------|--------|--------|--------|--------|--------|-----------|-------------|---------------------|
| Nup35    | -3.324 | -3.247 | -3.187 | -0.998 | -2.270 | -4.596 | -2.952 | -4.585 | -4.054 | -4.297 | 69482     | NUP35       | NM_001190179_2_+_1  |
| Rps27rt  | 9.242  | 9.047  | 9.272  | 8.930  | 9.503  | 9.241  | 9.644  | 9.205  | 8.315  | 7.948  | 100043813 | NA          | NM_001190258_3_-_1  |
| Mrps36   | 3.043  | 2.833  | 2.548  | 2.635  | 2.441  | 2.047  | 2.544  | 2.122  | 1.476  | 1.360  | 66128     | MRPS36      | NM_001190264_13_-_1 |
| Gpr155   | 5.993  | 5.788  | 3.103  | 2.617  | 4.361  | 4.834  | 4.118  | 3.929  | 3.543  | 3.732  | 68526     | GPR155      | NM_001190297_2_-_1  |
| Gm14326  | 2.555  | 1.504  | 2.304  | 2.193  | 2.755  | 2.431  | 3.517  | 2.671  | 3.799  | 4.032  | 665211    | ZNF442      | NM_001190302_2_-_1  |
| Clec4b1  | 1.055  | -0.321 | 0.746  | 1.763  | 3.327  | 4.260  | 5.797  | 7.117  | 3.087  | 4.164  | 69810     | CLEC4C      | NM_001190310_6_+_1  |
| Clec4n   | -4.810 | -4.636 | -4.849 | -3.861 | -3.366 | -2.348 | -0.797 | -0.449 | -0.988 | -2.210 | 56620     | CLEC6A      | NM_001190320_6_+_1  |
| Clec4n   | 2.340  | -0.097 | 0.992  | 1.056  | 2.413  | 3.108  | 2.838  | 3.871  | 1.446  | 3.051  | 56620     | CLEC6A      | NM_001190321_6_+_1  |
| Chchd7   | 3.264  | 3.299  | 2.010  | 1.669  | 1.722  | 1.476  | 1.833  | 1.540  | 2.146  | 1.922  | 66433     | CHCHD7      | NM_001190322_4_+_1  |
| Chchd7   | 2.728  | 2.670  | -0.402 | -0.632 | 0.530  | -0.052 | 0.370  | 0.357  | 0.378  | 0.429  | 66433     | CHCHD7      | NM_001190323_4_+_1  |
| Chchd7   | 2.009  | 1.392  | 0.367  | 0.620  | 0.231  | -0.714 | 1.364  | -0.147 | 0.146  | -0.958 | 66433     | CHCHD7      | NM_001190324_4_+_1  |
| Igl11    | -0.214 | -4.981 | -2.161 | -4.877 | -4.981 | -4.981 | -4.958 | -4.812 | -4.981 | -4.981 | 16136     | IGLL1 IGLL5 | NM_001190325_16_-_1 |
| Trmsb10  | 1.025  | 0.130  | 2.721  | 2.523  | 1.608  | 1.230  | 2.012  | 1.285  | 2.786  | 1.801  | 19240     | NA          | NM_001190327_6_-_1  |
| Frmd7    | 2.613  | 3.193  | -2.397 | -2.705 | -0.434 | -1.497 | 0.987  | 0.569  | 1.946  | 1.760  | 385354    | FRMD7       | NM_001190332_X_-_1  |
| Ccr6     | -2.326 | -4.890 | -3.245 | -1.762 | 3.568  | 2.649  | -0.105 | 0.821  | -4.978 | -4.981 | 12458     | CCR6        | NM_001190333_17_+_1 |
| Ccr6     | 1.105  | 1.815  | -4.889 | -1.459 | 3.765  | 3.521  | 1.080  | 1.533  | -4.830 | -4.962 | 12458     | CCR6        | NM_001190334_17_+_1 |
| Ccr6     | 1.418  | -3.776 | -2.888 | -2.060 | 2.626  | 0.769  | 1.121  | -4.025 | -4.515 | -4.893 | 12458     | CCR6        | NM_001190335_17_+_1 |
| Ccr6     | -3.343 | -3.560 | -4.702 | -2.462 | -3.144 | -4.203 | -1.166 | -4.187 | -3.927 | -3.091 | 12458     | CCR6        | NM_001190336_17_+_1 |
| Ccr6     | 2.061  | -3.812 | -1.725 | -0.640 | 2.831  | 0.433  | 0.015  | 0.201  | -1.626 | -0.753 | 12458     | CCR6        | NM_001190337_17_+_1 |
| Ccr6     | 2.810  | 4.118  | -4.655 | 0.964  | 3.751  | 6.459  | 1.810  | 4.304  | -3.551 | -2.481 | 12458     | CCR6        | NM_001190338_17_+_1 |
| Ccm2     | 3.903  | 3.620  | 2.075  | 0.869  | 2.331  | 0.851  | 2.805  | 2.418  | 3.529  | 1.875  | 216527    | CCM2        | NM_001190343_11_+_1 |
| Ccm2     | 2.669  | 2.322  | 1.399  | 1.168  | 1.553  | 0.749  | 2.182  | 1.379  | 2.458  | 1.814  | 216527    | CCM2        | NM_001190344_11_+_1 |
| Gm4832   | -4.981 | -4.981 | -4.979 | -4.979 | -4.272 | -4.248 | -3.880 | -4.545 | -4.190 | -4.981 | 225058    | NA          | NM_001190356_17_+_1 |
| Naxd     | 5.257  | 5.484  | 4.650  | 4.634  | 4.440  | 4.455  | 4.762  | 4.570  | 4.510  | 4.458  | 69225     | NAXD        | NM_001190357_8_+_1  |
| Ankrd29  | -0.738 | -1.062 | -3.331 | -3.961 | -0.766 | -1.779 | -3.398 | -3.885 | -4.981 | -4.981 | 225187    | ANKRD29     | NM_001190371_18_-_1 |
| Kcng2    | -2.739 | -1.733 | 1.836  | 1.701  | -1.177 | 0.677  | -0.956 | 2.172  | -0.404 | 0.365  | 240444    | KCNQ2       | NM_001190373_18_-_1 |
| Camta2   | -4.091 | -3.392 | -2.664 | -4.720 | -4.604 | -4.898 | -2.284 | -4.794 | -4.168 | -4.339 | 216874    | CAMTA2      | NM_001190376_11_-_1 |
| Camta2   | 3.750  | 3.709  | 5.119  | 5.130  | 5.866  | 5.888  | 5.669  | 5.583  | 6.198  | 6.233  | 216874    | CAMTA2      | NM_001190378_11_-_1 |
| Camta2   | 0.322  | 1.363  | 2.934  | 2.564  | 2.703  | 2.365  | 2.652  | 2.880  | 2.033  | 2.889  | 216874    | CAMTA2      | NM_001190379_11_-_1 |
| Caly     | -4.981 | -4.981 | -4.981 | -4.981 | -4.981 | -4.981 | -4.981 | -4.981 | -4.981 | -4.981 | 68566     | CALY        | NM_001190386_7_-_1  |
| Usp34    | 4.604  | 4.625  | 4.948  | 5.083  | 4.795  | 4.958  | 4.803  | 4.760  | 4.174  | 4.665  | 17847     | USP34       | NM_001190401_11_+_1 |
| Pkib     | -4.169 | -0.796 | -4.137 | -1.141 | -4.850 | -4.921 | -4.776 | -4.944 | -3.981 | -4.280 | 18768     | PKIB        | NM_001190402_10_+_1 |
| Gas2l1   | -4.981 | -4.981 | -4.653 | -4.717 | -4.956 | -4.952 | -3.784 | -4.994 | -1.047 | -1.595 | 78926     | GAS2L1      | NM_001190406_11_-_1 |
| Gas2l1   | -1.712 | 0.413  | 1.788  | 2.403  | 0.472  | 0.301  | 1.073  | 1.621  | 3.561  | 3.745  | 78926     | GAS2L1      | NM_001190408_11_-_1 |
| Magt1    | 7.398  | 7.164  | 7.172  | 7.100  | 6.357  | 6.393  | 6.595  | 6.857  | 6.494  | 7.234  | 67075     | MAGT1       | NM_001190409_X_-_1  |
| Gne      | 6.351  | 5.831  | 4.400  | 4.354  | 4.355  | 4.467  | 4.084  | 4.371  | 4.291  | 4.322  | 50798     | GNE         | NM_001190414_4_-_1  |
| Fau      | 3.165  | 4.600  | 2.741  | 4.415  | 2.725  | 4.265  | 3.200  | 4.319  | 1.987  | 3.996  | 14109     | FAU         | NM_001190436_19_+_1 |
| Abhd11   | 4.729  | 4.820  | 3.543  | 3.984  | 3.534  | 3.830  | 3.785  | 4.241  | 4.514  | 4.208  | 68758     | ABHD11      | NM_001190437_5_+_1  |
| Abcf2    | 0.745  | -0.874 | 1.333  | 1.552  | 1.762  | 0.599  | 0.589  | 0.534  | 1.789  | 0.864  | 27407     | ABCF2       | NM_001190443_5_-_1  |
| Aamp     | 3.389  | 2.773  | 3.255  | 3.169  | 3.228  | 3.081  | 3.169  | 3.341  | 3.421  | 3.377  | 227290    | AAMP        | NM_001190444_1_-_1  |
| Faap20   | 6.154  | 6.239  | 5.002  | 5.111  | 5.380  | 5.403  | 5.324  | 5.097  | 4.573  | 4.320  | 67513     | FAAP20      | NM_001190445_4_+_1  |
| Ddc      | -3.368 | -2.970 | -4.810 | -4.803 | -4.978 | -4.944 | -4.917 | -4.806 | -4.981 | -4.981 | 13195     | DDC         | NM_001190448_11_-_1 |
| Ddah2    | 0.126  | 0.638  | 0.411  | 0.380  | 1.129  | 0.040  | -0.037 | -0.804 | -1.201 | -1.084 | 51793     | DDAH2       | NM_001190449_17_+_1 |
| Dctn2    | 5.490  | 4.881  | 5.120  | 4.923  | 5.018  | 4.979  | 5.051  | 4.552  | 4.910  | 4.267  | 69654     | DCTN2       | NM_001190453_10_+_1 |
| Dctn2    | -1.088 | -3.753 | -2.606 | -4.643 | -1.695 | -0.917 | -1.067 | -1.138 | -0.376 | -4.656 | 69654     | DCTN2       | NM_001190454_10_+_1 |
| Hilpda   | -4.273 | -4.525 | -4.508 | -1.793 | -4.738 | -3.122 | -3.072 | -4.926 | -4.141 | -4.313 | 69573     | HILPDA      | NM_001190461_6_+_1  |
| Dact1    | -4.981 | -4.981 | -4.659 | -4.790 | -4.973 | -4.539 | -4.705 | -4.962 | -1.856 | -4.609 | 59036     | DACT1       | NM_001190466_12_+_1 |
| Dapk3    | 0.191  | 3.082  | 2.458  | 2.861  | 1.100  | 1.578  | 2.084  | 1.802  | 0.497  | -0.194 | 13144     | DAPK3       | NM_001190473_10_+_1 |
| Dapk3    | 5.315  | 5.053  | 5.246  | 5.456  | 4.708  | 4.938  | 4.572  | 4.817  | 4.832  | 4.655  | 13144     | DAPK3       | NM_001190474_10_+_1 |
| Pcsk5    | -4.981 | -4.981 | -2.518 | -3.585 | -4.970 | -4.799 | -4.981 | -4.981 | -4.981 | -4.981 | 18552     | PCSK5       | NM_001190483_19_-_1 |
| Dmpk     | -4.361 | -3.765 | -4.115 | -2.581 | -3.337 | -4.857 | -3.014 | -3.907 | -4.561 | -2.060 | 13400     | DMPK        | NM_001190490_7_+_1  |
| Dmpk     | -0.449 | -1.400 | -1.983 | -2.044 | -2.430 | -1.585 | -1.002 | -1.992 | -2.546 | -4.351 | 13400     | DMPK        | NM_001190491_7_+_1  |
| Dlk1     | -4.981 | -3.805 | -4.981 | -4.981 | -4.975 | -4.975 | -4.981 | -4.981 | -4.981 | -4.981 | 13386     | DLK1        | NM_001190705_12_+_1 |
| Dbf4     | 1.357  | 1.714  | 1.685  | 0.803  | 1.044  | -1.542 | 1.307  | 1.110  | -1.146 | 0.268  | 27214     | DBF4        | NM_001190717_5_-_1  |
| Dcaf12l1 | -4.981 | -4.981 | -4.962 | -4.536 | -4.952 | -2.513 | -4.977 | -4.977 | -4.981 | -4.981 | 245404    | NA          | NM_001190718_X_-_1  |
| Gm20594  | -1.495 | -1.049 | 0.127  | -0.297 | -0.505 | -0.588 | -1.114 | -1.509 | -1.624 | -1.584 | 100463512 | NA          | NM_001190732_6_+_1  |
| Dcun1d4  | -4.330 | -4.048 | -2.688 | -1.166 | -0.170 | -1.447 | -1.292 | -2.269 | 0.555  | -0.079 | 100737    | DCUN1D4     | NM_001190733_5_+_1  |
| Dcun1d4  | 1.412  | -0.155 | 1.034  | -0.111 | 0.111  | -0.550 | 0.652  | -2.131 | 0.855  | -0.580 | 100737    | DCUN1D4     | NM_001190734_5_+_1  |
| Ddx19b   | -3.958 | -3.083 | -2.556 | -4.450 | -3.592 | -4.588 | -1.984 | -3.221 | -0.366 | -2.119 | 234733    | DDX19B      | NM_001190786_8_-_1  |
| Ddx55    | -4.605 | -4.456 | -4.762 | -4.851 | -1.798 | -3.087 | -2.187 | -4.126 | -4.620 | -4.903 | 67848     | DDX55       | NM_001190795_5_+_1  |
| Ddx19b   | -4.524 | -3.758 | -3.948 | -3.044 | -4.669 | -4.955 | -4.162 | -3.772 | -3.803 | -4.260 | 234733    | DDX19B      | NM_001190800_8_-_1  |
| Dnajb11  | 7.579  | 7.679  | 7.178  | 7.624  | 6.687  | 7.040  | 6.842  | 7.498  | 7.042  | 7.228  | 67838     | DNAJB11     | NM_001190804_16_+_1 |
| Dnajb11  | 0.449  | 0.288  | -0.021 | -0.477 | -1.679 | -2.145 | -1.302 | -0.498 | -4.833 | -0.324 | 67838     | DNAJB11     | NM_001190805_16_+_1 |
| Dnajc1   | 2.770  | 3.156  | 3.108  | 2.444  | 3.041  | 2.885  | 2.239  | 2.484  | 2.900  | 2.377  | 13418     | DNAJC1      | NM_001190817_2_-_1  |
| Jak3     | 2.427  | 2.310  | 2.907  | 2.997  | 3.609  | 3.664  | 3.865  | 3.764  | 3.948  | 4.506  | 16453     | JAK3        | NM_001190830_8_+_1  |
| Kat2b    | 3.472  | 2.880  | 4.019  | 3.534  | 3.706  | 3.672  | 4.123  | 3.727  | 4.238  | 4.110  | 18519     | KAT2B       | NM_001190846_17_+_1 |
| Pdlim5   | -4.732 | -4.760 | -3.048 | -4.786 | -3.757 | -4.167 | -4.641 | -4.205 | -4.511 | -4.850 | 56376     | PDLIM5      | NM_001190852_3_-_1  |
| Pdlim5   | -4.842 | -4.769 | -4.899 | -4.956 | -4.942 | -4.604 | -4.470 | -4.935 | -4.981 | -4.977 | 56376     | PDLIM5      | NM_001190853_3_-_1  |
| Pdlim5   | -0.784 | -3.926 | -0.910 | -2.599 | -1.003 | -1.067 | -0.704 | -3.769 | -4.281 | -4.434 | 56376     | PDLIM5      | NM_001190854_3_-_1  |
| Pdlim5   | -4.245 | -4.510 | -4.615 | -1.488 | -2.393 | -4.977 | -4.093 | -2.487 | -1.443 | 0.291  | 56376     | PDLIM5      | NM_001190855_3_-_1  |
| Pdlim5   | -4.594 | -4.620 | -1.666 | -4.537 | -4.529 | -4.908 | -2.013 | -4.919 | -2.376 | -4.673 | 56376     | PDLIM5      | NM_001190856_3_-_1  |
| Pdlim5   | -4.945 | -4.702 | -4.791 | -4.857 | -4.768 | -4.845 | -4.488 | -3.331 | -4.981 | -4.975 | 56376     | PDLIM5      | NM_001190857_3_-_1  |
| Kcne3    | -4.981 | -4.981 | -4.981 | -4.981 | -4.981 | -4.981 | -4.976 | -3.020 | -2.378 | -2.606 | 57442     | KCNE3       | NM_001190869_7_+_1  |
| Kcne3    | -4.981 | -4.981 | -1.442 | -1.615 | -2.302 | -2.974 | 2.241  | 2.337  | 2.203  | 1.728  | 57442     | KCNE3       | NM_001190870_7_+_1  |

|          |        |        |        |        |        |        |        |        |        |        |           |          |                        |
|----------|--------|--------|--------|--------|--------|--------|--------|--------|--------|--------|-----------|----------|------------------------|
| Kcne3    | -4.710 | -4.981 | -2.943 | -2.099 | -3.760 | -2.106 | 1.719  | 2.766  | 1.862  | 2.706  | 57442     | KCNE3    | NM_001190871_7_+1      |
| Kirrel3  | -4.981 | -4.981 | -4.899 | -3.957 | -4.743 | -4.831 | -4.519 | -3.670 | -4.226 | -3.979 | 67703     | KIRREL3  | NM_001190911_9_+1      |
| Kirrel3  | -4.981 | -4.981 | -4.888 | -3.778 | -4.724 | -4.822 | -4.484 | -3.513 | -4.204 | -3.957 | 67703     | KIRREL3  | NM_001190912_9_+1      |
| Kirrel3  | -4.981 | -2.883 | -3.459 | -1.945 | -4.789 | -4.170 | -4.509 | -2.971 | -4.981 | -4.981 | 67703     | KIRREL3  | NM_001190913_9_+1      |
| Kirrel3  | -4.981 | -4.981 | -4.970 | -4.970 | -4.316 | -4.918 | -4.847 | -4.878 | -4.579 | -4.443 | 67703     | KIRREL3  | NM_001190914_9_+1      |
| Kcne3    | -2.729 | -4.981 | -2.313 | -3.652 | -3.148 | -2.834 | 1.600  | 2.128  | 1.470  | -0.718 | 57442     | KCNE3    | NM_001190950_7_+1      |
| Axl      | -2.490 | -3.751 | 1.422  | -1.334 | -0.059 | -1.810 | 1.370  | 2.807  | 2.709  | 1.971  | 26362     | AXL      | NM_001190974_7_+1      |
| Axl      | 2.638  | 2.162  | 1.002  | 1.163  | 1.952  | 1.609  | 2.972  | 3.366  | 1.914  | 0.932  | 26362     | AXL      | NM_001190975_7_+1      |
| Kif17    | -1.007 | -1.499 | 0.158  | -0.295 | 1.937  | 2.384  | 0.162  | -1.032 | -1.884 | -4.981 | 16559     | KIF17    | NM_001190978_4_+1      |
| Lanc1    | 2.902  | 3.485  | -2.652 | 0.383  | -1.722 | 2.530  | -0.527 | 0.256  | -0.074 | -0.825 | 14768     | LANCL1   | NM_001190984_1_+1      |
| Lanc1    | 6.677  | 6.481  | 4.635  | 4.511  | 5.029  | 4.916  | 4.768  | 4.278  | 3.924  | 3.457  | 14768     | LANCL1   | NM_001190985_1_+1      |
| Ndfip2   | 3.788  | 4.604  | 3.788  | 4.088  | 2.973  | 3.272  | 3.058  | 3.673  | 3.237  | 4.351  | 76273     | NDFIP2   | NM_001190989_14_+1     |
| Lins1    | 2.426  | 1.496  | 1.873  | 2.869  | 1.881  | 1.427  | 1.733  | 2.211  | 2.626  | 2.750  | 72635     | LINS1    | NM_001191001_7_+1      |
| Lsm6     | 7.290  | 7.208  | 6.757  | 6.945  | 6.999  | 6.962  | 6.859  | 6.545  | 5.126  | 5.215  | 78651     | LSM6     | NM_001191004_8_+1      |
| G6b      | -4.692 | -4.523 | -4.927 | -3.989 | -2.866 | -4.954 | -4.569 | -2.662 | -0.401 | -0.182 | 106722    | C6orf25  | NM_001191012_17_+1     |
| Ddx43    | -2.483 | -3.408 | 1.250  | 1.803  | -0.351 | 0.653  | -1.709 | -1.179 | -4.981 | -1.778 | 100048658 | DDX43    | NM_001191044_9_+1      |
| Lysmd4   | -1.565 | -0.107 | 0.815  | 0.609  | 0.169  | 0.316  | -0.763 | 0.290  | -0.339 | 1.059  | 75099     | LYSMD4   | NM_001191051_7_+1      |
| Meis1    | -0.107 | 1.340  | 0.188  | 0.102  | 2.277  | 1.759  | 1.136  | 0.962  | 1.950  | 1.752  | 17268     | NA       | NM_001193271_11_+1     |
| Lims1    | -0.571 | -0.047 | 0.417  | 0.279  | -0.621 | -0.154 | -0.543 | -0.539 | 0.365  | -0.305 | 110829    | LIMS1    | NM_001193303_10_+1     |
| Mical2   | -3.092 | -4.981 | -4.333 | -1.564 | -1.713 | -2.170 | -4.155 | -4.602 | -1.586 | -4.813 | 320878    | MICAL2   | NM_001193305_7_+1      |
| Morc4    | -3.843 | -3.267 | -4.932 | -4.386 | -3.996 | -4.756 | -3.905 | -2.893 | -4.981 | -2.750 | 75746     | MORC4    | NM_001193309_X_+1      |
| Cldn7    | -4.981 | -4.813 | -3.357 | -4.455 | -2.943 | -3.693 | -4.308 | -3.679 | -4.981 | -4.981 | 53624     | CLDN7    | NM_001193619_11_+1     |
| Galns    | 1.235  | 0.727  | 0.225  | -0.512 | -0.955 | -1.470 | -2.241 | -1.474 | 1.767  | 1.177  | 50917     | GALNS    | NM_001193645_8_+1      |
| Cldn12   | -3.869 | -3.477 | -3.751 | -2.348 | -4.658 | -3.650 | -2.973 | -3.021 | -3.431 | 1.037  | 64945     | CLDN12   | NM_001193659_5_+1      |
| Cldn12   | -3.422 | -2.995 | -4.039 | -4.426 | -4.526 | -2.502 | -4.300 | -2.983 | -0.492 | -2.835 | 64945     | CLDN12   | NM_001193660_5_+1      |
| Cldn12   | 1.397  | 1.122  | 0.650  | -0.004 | -2.263 | -1.351 | -0.196 | -0.672 | -0.024 | 1.635  | 64945     | CLDN12   | NM_001193661_5_+1      |
| Gm13304  | -4.981 | -4.566 | -4.970 | -4.962 | -4.981 | -4.981 | -4.832 | -4.930 | -4.981 | -4.981 | 100504346 | CCL21    | NM_001193666_4_+1      |
| Gm13304  | -4.981 | -4.566 | -4.966 | -4.904 | -4.981 | -4.981 | -4.631 | -4.916 | -4.981 | -4.981 | 100504346 | CCL21    | NM_001193666_dup1_4_+2 |
| Gm13304  | -4.981 | -4.566 | -4.966 | -4.904 | -4.981 | -4.981 | -4.631 | -4.916 | -4.981 | -4.981 | 100504346 | CCL21    | NM_001193666_dup2_4_+3 |
| Gm13304  | -4.981 | -4.566 | -4.970 | -4.962 | -4.981 | -4.981 | -4.832 | -4.930 | -4.981 | -4.981 | 100504346 | CCL21    | NM_001193666_dup3_4_+4 |
| Gm1987   | -0.663 | -2.681 | -3.623 | -3.289 | -3.909 | -4.988 | -2.308 | -4.045 | -4.057 | -4.981 | 100504362 | CCL21    | NM_001193667_4_+1      |
| Gm10591  | -4.981 | -4.566 | -4.970 | -4.962 | -4.981 | -4.981 | -4.832 | -4.930 | -4.981 | -4.981 | 100504239 | CCL21    | NM_001193668_4_+1      |
| Gm10591  | -4.981 | -4.566 | -4.966 | -4.904 | -4.981 | -4.981 | -4.631 | -4.916 | -4.981 | -4.981 | 100504239 | CCL21    | NM_001193668_dup1_4_+2 |
| Gm10591  | -4.981 | -4.566 | -4.966 | -4.904 | -4.981 | -4.981 | -4.631 | -4.916 | -4.981 | -4.981 | 100504239 | CCL21    | NM_001193668_dup2_4_+3 |
| Gm10591  | -4.981 | -4.566 | -4.970 | -4.962 | -4.981 | -4.981 | -4.832 | -4.930 | -4.981 | -4.981 | 100504239 | CCL21    | NM_001193668_dup3_4_+4 |
| Dlc1     | -1.762 | -0.093 | -1.888 | -1.340 | 2.054  | 4.199  | -2.261 | 0.722  | -4.981 | -4.072 | 50768     | DLC1     | NM_001194940_8_+1      |
| Kat7     | 5.910  | 6.081  | 5.457  | 5.647  | 5.846  | 5.698  | 5.758  | 5.833  | 6.337  | 6.189  | 217127    | KAT7     | NM_001195003_11_+1     |
| Kat7     | 3.542  | 3.717  | 3.523  | 3.471  | 3.300  | 3.550  | 3.211  | 3.204  | 4.414  | 4.245  | 217127    | KAT7     | NM_001195004_11_+1     |
| Ndrgr4   | -4.981 | -3.225 | -4.031 | -4.270 | -4.752 | -4.826 | -4.778 | -4.860 | -4.981 | -4.510 | 234593    | NDRG4    | NM_001195006_8_+1      |
| Nploc4   | 4.607  | 4.767  | 5.088  | 5.448  | 4.955  | 5.076  | 4.499  | 5.256  | 6.453  | 6.374  | 217365    | NPLOC4   | NM_001195023_11_+1     |
| Nuak2    | -4.306 | -3.176 | -2.387 | -2.553 | -0.683 | -2.981 | -2.413 | -2.655 | 0.735  | -1.555 | 74137     | NUAK2    | NM_001195025_1_+1      |
| Pag1     | 4.207  | 3.706  | 1.368  | 1.470  | 3.524  | 3.498  | 4.111  | 3.606  | 4.974  | 4.439  | 94212     | PAG1     | NM_001195031_3_+1      |
| Abhd12b  | -2.268 | -4.981 | -4.988 | -4.988 | -4.981 | -4.981 | -4.981 | -4.981 | -4.981 | -4.981 | 100504285 | ABHD12B  | NM_001195033_12_+1     |
| Pak3     | -4.981 | -4.981 | -4.980 | -4.862 | -4.550 | -4.239 | -4.981 | -4.981 | -4.981 | -4.981 | 18481     | PAK3     | NM_001195046_X_+1      |
| Pak3     | -4.981 | -4.981 | -4.980 | -4.730 | -4.376 | -3.404 | -4.981 | -4.981 | -4.981 | -4.981 | 18481     | PAK3     | NM_001195047_X_+1      |
| Pak3     | -4.981 | -4.981 | -4.979 | -4.933 | -4.755 | -4.813 | -4.981 | -4.981 | -4.981 | -4.981 | 18481     | PAK3     | NM_001195048_X_+1      |
| Pak3     | -4.981 | -4.981 | -4.979 | -4.974 | -4.350 | -3.377 | -4.981 | -4.981 | -4.981 | -4.981 | 18481     | PAK3     | NM_001195049_X_+1      |
| Phactr2  | 5.844  | 5.780  | 5.550  | 5.471  | 5.010  | 4.886  | 5.303  | 4.988  | 4.284  | 4.507  | 215789    | PHACTR2  | NM_001195065_10_+1     |
| Phactr2  | -0.752 | 0.077  | -0.419 | -0.374 | -0.633 | -1.543 | -0.726 | -1.235 | -4.718 | -0.849 | 215789    | PHACTR2  | NM_001195066_10_+1     |
| Klhl3    | -1.814 | -1.918 | -4.981 | -4.981 | -4.868 | -4.263 | -4.971 | -4.656 | -2.871 | -4.981 | 100503085 | KLHL3    | NM_001195075_13_+1     |
| Phc2     | 5.238  | 5.125  | 6.061  | 6.067  | 5.462  | 5.625  | 5.623  | 5.919  | 6.858  | 6.663  | 54383     | PHC2     | NM_001195083_4_+1      |
| Plscr2   | -4.981 | -4.981 | -4.930 | -3.643 | -4.953 | -4.805 | -4.973 | -4.795 | -3.871 | -4.981 | 18828     | NA       | NM_001195084_9_+1      |
| Ppfia1   | -1.543 | 0.142  | -2.297 | -0.552 | -3.205 | -2.146 | -2.039 | -1.477 | -3.543 | -0.711 | 233977    | PPFIA1   | NM_001195086_7_+1      |
| Tmc8     | -4.527 | 1.539  | -2.383 | 0.235  | -1.023 | 1.162  | -0.906 | -0.248 | 2.159  | 0.777  | 217356    | TMC8     | NM_001195088_11_+1     |
| Tmc8     | 2.750  | 4.042  | 0.499  | 2.952  | 1.316  | 3.235  | 1.134  | 2.500  | 2.744  | 2.643  | 217356    | TMC8     | NM_001195089_11_+1     |
| Tmc8     | -4.084 | 1.708  | -2.587 | 0.380  | -4.273 | 0.731  | -4.377 | 0.099  | -4.587 | 0.965  | 217356    | TMC8     | NM_001195090_11_+1     |
| Ccer2    | -4.981 | -4.981 | -2.901 | -3.696 | -4.980 | -4.980 | -4.480 | -4.973 | -3.977 | -4.981 | 100504112 | CCER2    | NM_001195091_7_+1      |
| Cfap73   | -4.981 | -4.981 | -4.981 | -4.981 | -4.524 | -4.896 | -4.962 | -4.972 | -4.981 | -4.981 | 546886    | CFAP73   | NM_001195094_5_+1      |
| Phactr2  | -4.895 | -4.567 | -4.503 | -3.305 | -4.830 | -4.961 | -4.494 | -3.434 | -4.353 | -4.407 | 215789    | PHACTR2  | NM_001195096_10_+1     |
| Phc2     | 2.135  | 1.809  | 2.130  | 1.699  | 0.428  | 0.583  | 0.571  | 1.936  | -0.004 | 0.140  | 54383     | PHC2     | NM_001195130_4_+1      |
| Trmt2a   | 0.726  | 0.262  | 0.091  | -1.646 | -0.896 | -2.763 | -1.425 | -0.594 | -0.971 | -2.027 | 15547     | TRMT2A   | NM_001195205_16_+1     |
| Pet100   | 6.495  | 6.377  | 5.625  | 5.553  | 5.847  | 6.043  | 6.214  | 5.940  | 5.474  | 5.010  | 100503890 | PET100   | NM_001195244_8_+1      |
| Gm3336   | -1.774 | -4.981 | 5.166  | 5.577  | -1.888 | 1.401  | -1.091 | 1.364  | -4.981 | -4.981 | 100502950 | NA       | NM_001195253_8_+1      |
| Tgfb3l   | -0.129 | -0.243 | -1.745 | -1.783 | -1.096 | -1.384 | -1.115 | -1.449 | -1.740 | -2.383 | 100044509 | TGFBR3L  | NM_001195258_8_+1      |
| Pdzd7    | -0.724 | -2.377 | -4.250 | -4.950 | -4.817 | -4.972 | -4.942 | -3.979 | -4.981 | -4.981 | 100503041 | PDZD7    | NM_001195265_19_+1     |
| Cbap     | 0.190  | 1.539  | 0.762  | 0.368  | 0.859  | 1.029  | 0.269  | -0.191 | -1.861 | -3.549 | 100503659 | NA       | NM_001195268_10_+1     |
| Fsd1l    | -1.549 | -0.940 | -1.674 | -0.057 | -3.314 | -2.690 | -2.712 | -1.752 | -2.349 | 0.829  | 319636    | FSD1L    | NM_001195284_4_+1      |
| Kifc1    | -2.273 | -0.831 | -0.995 | -0.615 | 0.407  | -0.282 | 0.147  | -0.613 | -0.662 | -3.506 | 100502766 | KIFC1    | NM_001195298_17_+1     |
| Bbip1    | 5.682  | 5.465  | 4.328  | 4.385  | 4.255  | 4.615  | 4.249  | 4.185  | 3.512  | 3.670  | 100503572 | BBIP1    | NM_001195338_19_+1     |
| Bbip1    | 4.849  | 5.119  | 4.762  | 4.474  | 4.062  | 3.928  | 4.279  | 4.220  | 4.204  | 4.056  | 100503572 | BBIP1    | NM_001195348_19_+1     |
| Commmd7  | 2.644  | 3.319  | 2.061  | 2.388  | 1.812  | 2.041  | 1.794  | 2.130  | 1.812  | 1.496  | 99311     | COMMMD7  | NM_001195390_2_+1      |
| Cngb1    | -4.981 | -4.981 | -4.966 | -4.966 | -4.626 | -4.290 | -4.965 | -4.953 | -2.036 | -4.981 | 333329    | NA       | NM_001195413_8_+1      |
| Hist1h4m | 1.430  | -1.369 | 2.266  | -1.629 | 2.486  | -0.676 | 2.867  | -0.775 | 2.636  | -4.907 | 100041230 | HIST1H4D | NM_001195421_13_+1     |
| Srsf7    | 4.879  | 5.034  | 4.873  | 5.011  | 4.902  | 4.541  | 4.739  | 4.133  | 3.116  | 3.010  | 225027    | SRSF7    | NM_001195485_17_+1     |

|          |        |        |        |        |        |        |        |        |        |        |           |           |                    |
|----------|--------|--------|--------|--------|--------|--------|--------|--------|--------|--------|-----------|-----------|--------------------|
| Srsf7    | 4.698  | 4.546  | 4.850  | 4.680  | 4.919  | 4.769  | 4.626  | 4.397  | 2.957  | 3.485  | 225027    | SRSF7     | NM_001195486_17_-1 |
| Srsf7    | 4.463  | 4.224  | 4.314  | 4.094  | 4.362  | 4.163  | 3.986  | 3.407  | 2.475  | 2.677  | 225027    | SRSF7     | NM_001195487_17_-1 |
| Dclk2    | -3.291 | -4.126 | 0.402  | -0.639 | -4.724 | -3.174 | -3.787 | -2.568 | -4.500 | -1.809 | 70762     | DCLK2     | NM_001195496_3_-1  |
| Dclk2    | -1.392 | -2.313 | -0.764 | 0.239  | -2.365 | -1.498 | -1.645 | -0.672 | -2.224 | -3.676 | 70762     | DCLK2     | NM_001195497_3_-1  |
| Dclk2    | -3.461 | -4.204 | -2.311 | -4.329 | -4.783 | -2.739 | -3.650 | -1.283 | -4.961 | -2.739 | 70762     | DCLK2     | NM_001195498_3_-1  |
| Dclk2    | -3.425 | -4.190 | -1.373 | -3.132 | -4.778 | -2.512 | -4.025 | -4.533 | -4.567 | -2.555 | 70762     | DCLK2     | NM_001195499_3_-1  |
| Dclk2    | -4.981 | -4.981 | -2.736 | -4.890 | -4.493 | -4.659 | -4.327 | -4.932 | -4.225 | -4.981 | 70762     | DCLK2     | NM_001195500_3_-1  |
| Tpbgl    | -4.981 | -3.267 | -1.216 | -0.671 | -2.653 | -1.684 | -2.313 | -2.467 | -1.839 | -2.266 | 100503386 | TPBGL     | NM_001195529_7_-1  |
| Gm5741   | -3.090 | -2.587 | -4.725 | -4.284 | -4.977 | -4.823 | -4.087 | -3.309 | -4.981 | -2.962 | 100503710 | LOC648044 | NM_001195531_8_-1  |
| Smpd5    | 3.568  | 1.121  | -1.303 | -2.601 | 0.085  | -0.763 | -0.655 | -0.444 | -0.680 | -4.316 | 100503915 | SMPD5     | NM_001195537_15_+1 |
| Camta1   | 4.802  | 4.884  | 4.703  | 4.586  | 4.341  | 4.350  | 4.413  | 4.113  | 3.414  | 3.365  | 100072    | CAMTA1    | NM_001195565_4_-1  |
| Arhgap32 | 3.852  | 3.455  | 2.393  | 1.942  | 1.801  | 0.162  | 0.986  | 0.350  | 0.736  | 0.316  | 330914    | ARHGAP32  | NM_001195632_9_+1  |
| Epg5     | 3.538  | 3.851  | 4.250  | 4.017  | 3.907  | 3.711  | 3.579  | 3.442  | 3.945  | 4.049  | 100502841 | EPG5      | NM_001195633_18_+1 |
| Rp1      | -4.981 | -4.981 | -4.981 | -4.981 | -4.981 | -4.981 | -4.981 | -4.981 | -2.657 | -3.386 | 19888     | RP1       | NM_001195662_1_-1  |
| Ccdc170  | -4.981 | -4.981 | -2.120 | -3.231 | -4.669 | -4.532 | -2.090 | -3.020 | -4.394 | -4.981 | 100504234 | CCDC170   | NM_001195672_10_+1 |
| Prr22    | -0.516 | 0.075  | -0.851 | -1.412 | -1.068 | -2.300 | -2.081 | -3.188 | -2.267 | -2.008 | 100504446 | PRR22     | NM_001195673_17_+1 |
| Nuggc    | -4.981 | -4.981 | -2.724 | -4.977 | -3.423 | -3.900 | -3.308 | -1.232 | -4.981 | -4.981 | 100503545 | NUGC      | NM_001195674_14_+1 |
| Gm684    | -4.981 | -4.981 | -4.981 | -4.981 | -4.905 | -4.370 | -4.857 | -3.968 | -4.981 | -4.981 | 100502940 | COLCA2    | NM_001195681_9_-1  |
| Tmem95   | -4.981 | -4.981 | -4.603 | -4.943 | -4.924 | -4.973 | -4.049 | -4.714 | -4.394 | -4.981 | 100503361 | TMEM95    | NM_001195710_11_-1 |
| Dcdc2b   | -3.563 | -4.981 | -4.960 | -4.960 | -3.956 | -4.982 | -3.783 | -4.740 | -2.225 | -3.797 | 100504491 | DCDC2B    | NM_001195730_4_-1  |
| Fam150a  | 3.069  | 5.749  | -4.969 | -4.716 | -4.972 | -4.835 | -4.978 | -4.941 | -4.981 | -4.981 | 620393    | FAM150A   | NM_001195732_1_+1  |
| S100a2   | -2.505 | -3.408 | -4.981 | -4.981 | -4.771 | -4.965 | -4.976 | -4.900 | -4.981 | -4.981 | 628324    | NA        | NM_001195760_3_+1  |
| Lrrc74a  | -0.504 | -1.385 | -4.981 | -4.981 | -4.981 | -4.981 | -4.974 | -4.978 | -4.981 | -4.981 | 627607    | LRRC74A   | NM_001195767_12_+1 |
| Gprc5b   | -4.981 | -4.981 | -3.401 | -2.595 | 0.187  | 0.076  | -1.656 | -1.590 | -4.981 | -4.342 | 64297     | GPRC5B    | NM_001195774_7_-1  |
| Unkl     | 2.288  | 1.320  | 2.495  | 2.319  | 2.427  | 2.289  | 2.183  | 1.811  | 3.243  | 3.544  | 74154     | UNKL      | NM_001197024_17_+1 |
| Vit      | -4.981 | -4.981 | -4.664 | -4.965 | -2.934 | -4.949 | -4.524 | -4.969 | -4.981 | -4.981 | 74199     | VIT       | NM_001197028_17_+1 |
| Fgfr10p  | 3.745  | 4.141  | 1.181  | 1.144  | 1.624  | 1.454  | 1.551  | 1.206  | 2.645  | 1.898  | 75296     | FGFR10P   | NM_001197046_17_+1 |
| Rcc1     | -3.933 | -0.354 | 0.954  | 1.351  | 2.449  | 1.533  | 1.149  | 1.436  | 1.778  | 0.467  | 100088    | RCC1      | NM_001197082_4_-1  |
| Slc4a4   | -4.981 | -4.981 | -4.980 | -4.980 | -4.925 | -4.717 | -4.483 | -4.951 | -4.981 | -4.596 | 54403     | SLC4A4    | NM_001197147_5_+1  |
| Foxp1    | 5.133  | 5.573  | 3.075  | 2.614  | 2.923  | 3.295  | 4.219  | 4.901  | 1.533  | 1.471  | 108655    | NA        | NM_001197321_6_-1  |
| Foxp1    | 6.485  | 6.178  | 3.336  | 3.212  | 5.223  | 4.492  | 5.134  | 5.157  | 5.033  | 4.840  | 108655    | NA        | NM_001197322_6_-1  |
| H2-Q7    | 3.133  | 1.128  | 2.761  | 2.575  | 2.132  | 0.204  | 2.275  | 1.396  | 2.419  | -0.611 | 15018     | HLA-A     | NM_001198560_17_+1 |
| H2-Q7    | 9.011  | 7.620  | 6.928  | 6.950  | 7.158  | 6.679  | 7.197  | 6.375  | 5.926  | 3.711  | 15018     | HLA-A     | NM_001198561_17_+1 |
| Sulf1    | -4.244 | -4.035 | -4.886 | -4.899 | -4.942 | -4.898 | -4.836 | -4.984 | -4.981 | -4.981 | 240725    | SULF1     | NM_001198565_1_+1  |
| Sulf1    | -2.945 | -2.977 | -4.241 | -3.761 | -4.426 | -3.485 | -3.925 | -4.986 | -4.981 | -4.981 | 240725    | SULF1     | NM_001198566_1_+1  |
| Abi2     | 0.777  | 1.549  | -0.019 | -1.685 | -1.536 | -1.441 | -1.446 | -1.013 | -4.956 | -4.975 | 329165    | ABI2      | NM_001198570_1_+1  |
| Abi2     | -4.501 | -3.926 | -3.442 | -4.781 | -4.826 | -4.930 | -3.615 | -4.858 | -4.508 | -4.759 | 329165    | ABI2      | NM_001198571_1_+1  |
| Usp40    | 2.041  | 1.155  | 3.311  | 3.452  | 2.473  | 2.914  | 2.150  | 2.870  | 3.702  | 3.699  | 227334    | USP40     | NM_001198573_1_-1  |
| Map7     | 1.777  | -2.073 | -0.003 | -3.512 | 1.059  | -4.143 | 0.056  | -4.663 | -1.047 | -4.981 | 17761     | MAP7      | NM_001198635_10_+1 |
| Postn    | -3.982 | -3.831 | -4.950 | -0.820 | -4.875 | -4.825 | -3.305 | -4.765 | -4.981 | -4.785 | 50706     | POSTN     | NM_001198765_3_+1  |
| Postn    | -1.522 | 0.118  | -3.250 | 1.275  | -3.572 | 0.569  | -1.889 | 1.926  | -4.981 | -1.532 | 50706     | POSTN     | NM_001198766_3_+1  |
| Aatk     | -4.439 | -4.484 | -4.912 | -3.464 | -4.941 | -4.903 | -4.560 | -2.960 | -1.240 | -4.465 | 11302     | AATK      | NM_001198785_11_-1 |
| Aatk     | 0.233  | -3.076 | -1.447 | -3.103 | -1.731 | -0.380 | -0.583 | 0.345  | 3.857  | 3.522  | 11302     | AATK      | NM_001198787_11_-1 |
| Ccpg1os  | 2.787  | 2.992  | 1.399  | 1.019  | 0.863  | 1.821  | 1.075  | 1.402  | 0.687  | 0.630  | 546143    | C15orf65  | NM_001198789_9_-1  |
| AB124611 | 3.748  | 4.633  | 4.637  | 5.319  | 4.535  | 3.981  | 5.900  | 5.908  | 6.874  | 6.506  | 382062    | C19orf38  | NM_001198794_9_+1  |
| Sfmbt2   | -4.981 | -3.007 | -4.286 | -2.662 | -1.103 | -0.723 | -3.294 | -1.897 | 1.095  | 0.105  | 353282    | SFMBT2    | NM_001198808_2_+1  |
| Sfmbt2   | -4.981 | -3.408 | -3.555 | -0.857 | -2.403 | 0.270  | -3.638 | -2.037 | -1.398 | -1.412 | 353282    | SFMBT2    | NM_001198809_2_+1  |
| App      | -3.303 | 0.213  | -0.438 | 1.057  | -0.016 | 1.780  | 0.037  | 1.774  | 2.894  | 4.097  | 11820     | APP       | NM_001198823_16_-1 |
| App      | -2.538 | 1.609  | 1.749  | 2.235  | 1.741  | 2.728  | 1.843  | 2.389  | 4.109  | 5.035  | 11820     | APP       | NM_001198824_16_-1 |
| App      | 3.989  | 4.777  | 4.925  | 5.735  | 6.792  | 7.090  | 6.510  | 6.632  | 7.985  | 8.325  | 11820     | APP       | NM_001198825_16_-1 |
| App      | 1.908  | 3.238  | 2.787  | 4.541  | 4.788  | 6.176  | 4.127  | 6.004  | 6.524  | 7.261  | 11820     | APP       | NM_001198826_16_-1 |
| Ddr1     | 4.744  | 4.954  | 2.481  | 2.061  | 5.335  | 4.805  | 4.255  | 2.794  | 1.251  | -0.709 | 12305     | DDR1      | NM_001198831_17_-1 |
| Ddr1     | 5.271  | 5.482  | 3.428  | 2.407  | 5.622  | 5.794  | 4.438  | 3.785  | 0.647  | 0.106  | 12305     | DDR1      | NM_001198833_17_-1 |
| Coch     | -1.078 | 1.096  | -0.025 | -1.280 | -1.193 | -1.432 | -0.618 | -2.643 | -0.349 | -3.758 | 12810     | COCH      | NM_001198835_12_+1 |
| Bcar1    | -3.738 | -4.981 | -3.846 | -3.208 | -4.517 | -4.550 | -4.680 | -4.167 | -4.981 | -3.283 | 12927     | BCAR1     | NM_001198839_8_-1  |
| Csrp3    | -4.981 | -4.981 | -4.741 | -3.078 | -3.947 | -3.812 | 0.078  | -4.037 | -4.981 | -4.981 | 13009     | CSRP3     | NM_001198841_7_-1  |
| Ctbp1    | 0.324  | 1.553  | 1.391  | 1.168  | 1.250  | 0.323  | 1.460  | 1.255  | 1.736  | 1.838  | 13016     | CTBP1     | NM_001198859_5_-1  |
| Ctbp1    | 2.114  | 2.451  | 2.941  | 3.297  | 3.196  | 2.687  | 3.061  | 3.264  | 3.923  | 3.987  | 13016     | CTBP1     | NM_001198860_5_-1  |
| Ctbp1    | 5.301  | 5.284  | 5.217  | 5.583  | 5.684  | 5.649  | 5.449  | 5.532  | 6.741  | 6.622  | 13016     | CTBP1     | NM_001198861_5_-1  |
| Dctn1    | -4.515 | -4.354 | -2.721 | -3.805 | -3.370 | -2.932 | -3.350 | -3.897 | -1.833 | -4.887 | 13191     | DCTN1     | NM_001198866_6_+1  |
| Dctn1    | 4.453  | 4.519  | 5.532  | 5.357  | 5.761  | 5.637  | 5.844  | 5.736  | 6.612  | 6.490  | 13191     | DCTN1     | NM_001198867_6_+1  |
| Dync1i2  | -4.454 | -4.385 | -4.633 | -4.876 | -4.900 | -4.967 | -4.725 | -4.940 | -4.781 | -4.796 | 13427     | NA        | NM_001198872_2_+1  |
| Dync1i2  | -4.403 | -4.338 | -4.586 | -4.860 | -4.895 | -4.947 | -4.694 | -4.934 | -4.765 | -2.420 | 13427     | NA        | NM_001198873_2_+1  |
| Dync1i2  | -4.014 | -0.553 | -2.947 | -0.597 | -3.201 | -3.388 | -2.067 | -1.394 | -4.615 | -2.060 | 13427     | NA        | NM_001198874_2_+1  |
| Dync1i2  | -3.496 | -3.566 | -1.957 | -4.351 | -1.899 | -2.790 | -2.519 | -4.676 | -4.273 | -4.598 | 13427     | NA        | NM_001198875_2_+1  |
| Dync1i2  | 3.485  | 3.426  | 4.173  | 3.886  | 4.339  | 4.123  | 4.502  | 3.554  | 3.828  | 3.903  | 13427     | NA        | NM_001198876_2_+1  |
| Dync1i2  | -4.521 | -4.381 | -4.636 | -4.876 | -4.917 | -4.964 | -4.752 | -4.938 | -4.770 | -4.799 | 13427     | NA        | NM_001198877_2_+1  |
| Dync1i2  | -4.479 | -4.333 | -4.592 | -4.857 | -4.899 | -4.951 | -4.726 | -4.932 | -4.753 | -1.952 | 13427     | NA        | NM_001198878_2_+1  |
| Dpp6     | -4.981 | -4.981 | -4.977 | -4.977 | -4.873 | -2.141 | -4.980 | -4.971 | -4.981 | -4.981 | 13483     | DPP6      | NM_001198886_5_+1  |
| Adgrg1   | -2.989 | -0.290 | -2.194 | -1.988 | -3.674 | -2.300 | -1.315 | -4.641 | -3.648 | -3.585 | 14766     | ADGRG1    | NM_001198894_8_+1  |
| Arhgef2  | 1.048  | -3.543 | 1.153  | 2.284  | 5.127  | 5.503  | 4.152  | 3.902  | 0.474  | 1.496  | 16800     | ARHGEF2   | NM_001198911_3_+1  |
| Arhgef2  | -0.567 | -3.732 | -3.314 | -2.339 | 0.671  | 1.789  | -1.311 | -3.224 | -4.129 | -0.904 | 16800     | ARHGEF2   | NM_001198912_3_+1  |
| Arhgef2  | 1.500  | 1.111  | 2.032  | 1.782  | 1.097  | -1.130 | 2.068  | 2.017  | 3.689  | 3.691  | 16800     | ARHGEF2   | NM_001198913_3_+1  |
| Myb      | 1.058  | 1.008  | 0.653  | -0.093 | -0.404 | -1.157 | -4.153 | -1.970 | -1.330 | -4.938 | 17863     | MYB       | NM_001198914_10_-1 |

|           |        |        |        |        |        |        |        |        |        |        |        |           |                    |
|-----------|--------|--------|--------|--------|--------|--------|--------|--------|--------|--------|--------|-----------|--------------------|
| Me1       | -4.981 | -4.981 | -4.092 | -4.543 | -4.773 | -4.856 | -4.948 | -4.821 | -4.981 | -4.336 | 17436  | ME1       | NM_001198933_9_-1  |
| Ralbp1    | 6.273  | 6.517  | 5.934  | 5.952  | 5.683  | 5.479  | 6.368  | 6.280  | 6.282  | 6.434  | 19765  | RALBP1    | NM_001198949_17_-1 |
| Gm7694    | 1.210  | 0.295  | -0.188 | -1.739 | -0.556 | -2.115 | 1.535  | -0.046 | 2.928  | 1.208  | 665574 | C1orf226  | NM_001198955_1_-1  |
| Itsn2     | -4.814 | -4.676 | -4.915 | -4.946 | -2.916 | -3.887 | -4.750 | -3.889 | -2.343 | -4.901 | 20403  | ITSN2     | NM_001198968_12_+1 |
| Itsn2     | 4.275  | 4.788  | 5.309  | 5.300  | 5.386  | 5.639  | 4.611  | 5.116  | 5.002  | 4.656  | 20403  | ITSN2     | NM_001198969_12_+1 |
| BC049352  | 0.325  | -0.493 | 1.600  | 1.416  | 1.106  | 0.584  | 1.476  | 0.955  | 1.978  | 1.649  | 408059 | NA        | NM_001198971_9_+1  |
| Syk       | 4.676  | 6.418  | 5.670  | 6.533  | 7.307  | 8.251  | 7.383  | 8.162  | 8.474  | 9.138  | 20963  | SYK       | NM_001198977_13_+1 |
| Tcof1     | 3.969  | 3.641  | 3.087  | 3.559  | 3.709  | 4.082  | 4.203  | 4.151  | 4.939  | 4.762  | 21453  | TCOF1     | NM_001198984_18_-1 |
| Tjp2      | 0.392  | 1.757  | 3.848  | 3.678  | 3.797  | 3.607  | 3.153  | 3.100  | 3.382  | 3.614  | 21873  | TJP2      | NM_001198985_19_-1 |
| Vdac3     | 2.849  | 2.684  | 1.531  | 1.655  | 1.845  | 1.069  | 2.150  | 1.871  | 2.602  | 2.295  | 22335  | VDAC3     | NM_001198998_8_-1  |
| Golga5    | 5.121  | 5.156  | 4.701  | 4.610  | 4.679  | 4.560  | 4.680  | 4.478  | 4.306  | 4.111  | 27277  | GOLGA5    | NM_001199004_12_+1 |
| Dcaf11    | 5.083  | 5.446  | 5.550  | 5.690  | 5.747  | 5.456  | 5.518  | 5.470  | 6.190  | 5.737  | 28199  | DCAF11    | NM_001199009_14_+1 |
| Angel2    | 3.947  | 4.511  | 3.423  | 3.528  | 2.956  | 3.810  | 3.175  | 3.762  | 3.627  | 3.732  | 52477  | ANGEL2    | NM_001199020_1_+1  |
| Pla2g6    | 1.034  | 0.277  | 1.001  | -1.568 | -1.425 | -1.144 | -2.090 | -1.490 | 0.137  | -0.186 | 53357  | PLA2G6    | NM_001199023_15_-1 |
| Pla2g6    | 1.294  | 1.431  | 0.880  | 2.081  | 0.708  | 1.777  | 1.054  | 0.977  | -0.176 | 1.075  | 53357  | PLA2G6    | NM_001199024_15_-1 |
| Pla2g6    | 0.844  | 0.328  | 0.027  | -1.486 | -4.790 | -2.814 | -2.339 | -3.638 | -4.706 | -4.699 | 53357  | PLA2G6    | NM_001199025_15_-1 |
| Lgals8    | 3.445  | 3.644  | 2.676  | 2.729  | 3.193  | 3.657  | 4.001  | 4.268  | 4.778  | 4.796  | 56048  | LGALS8    | NM_001199043_13_-1 |
| Prrc2a    | 1.979  | 0.075  | 2.016  | 1.427  | 2.819  | 0.718  | 0.787  | 2.196  | 2.702  | 2.542  | 53761  | PRRC2A    | NM_001199044_17_-1 |
| Tubd1     | -3.800 | -3.487 | -3.751 | -4.885 | -4.231 | -4.534 | -4.535 | -4.325 | -3.891 | -2.940 | 56427  | TUBD1     | NM_001199045_11_+1 |
| Tubd1     | 0.663  | 0.889  | -1.562 | -2.079 | -0.637 | -1.089 | -1.016 | -0.788 | -0.396 | 0.107  | 56427  | TUBD1     | NM_001199046_11_+1 |
| Tubd1     | -1.294 | -0.998 | -1.577 | -3.710 | -0.954 | -2.197 | -0.864 | -2.742 | -2.546 | -1.521 | 56427  | TUBD1     | NM_001199047_11_+1 |
| Zfp942    | 4.184  | 4.667  | 4.318  | 4.084  | 4.086  | 4.198  | 4.091  | 3.968  | 4.070  | 4.747  | 73233  | NA        | NM_001199048_17_-1 |
| Rabgef1   | 2.832  | 3.301  | 4.171  | 4.190  | 3.407  | 3.687  | 3.494  | 4.044  | 4.277  | 4.574  | 56715  | RABGEF1   | NM_001199059_5_+1  |
| Wdr12     | -0.483 | -4.111 | 0.537  | 1.228  | 0.480  | 0.314  | -0.368 | 0.669  | -0.483 | 1.686  | 57750  | WDR12     | NM_001199060_1_-1  |
| Wdr12     | 3.831  | 3.943  | 4.653  | 4.892  | 4.407  | 4.314  | 4.229  | 4.081  | 2.996  | 2.619  | 57750  | WDR12     | NM_001199061_1_-1  |
| Wnk1      | 1.651  | 1.493  | 2.852  | 3.255  | 4.040  | 3.171  | 1.132  | 2.518  | 1.682  | 2.147  | 232341 | WNK1      | NM_001199083_6_-1  |
| Wnk1      | -2.336 | -2.236 | 2.552  | 1.711  | 0.793  | 1.705  | 1.125  | -0.716 | -0.148 | 0.411  | 232341 | WNK1      | NM_001199084_6_-1  |
| Trp53inp1 | 4.001  | 2.557  | 3.401  | 2.543  | 2.218  | 2.193  | 3.095  | 4.257  | 4.023  | 4.400  | 60599  | TP53INP1  | NM_001199105_4_+1  |
| Slc29a1   | 4.469  | 3.936  | 1.957  | 3.148  | 4.479  | 4.254  | 4.451  | 4.162  | 3.409  | 3.589  | 63959  | SLC29A1   | NM_001199113_17_-1 |
| Slc29a1   | 0.819  | 2.787  | 1.257  | -1.633 | 0.667  | 0.921  | 0.770  | 2.433  | -0.398 | 1.912  | 63959  | SLC29A1   | NM_001199114_17_-1 |
| Slc29a1   | 0.687  | -0.053 | -3.962 | -2.644 | -1.143 | -0.268 | -3.323 | -4.229 | -3.436 | -0.722 | 63959  | SLC29A1   | NM_001199115_17_-1 |
| Slc29a1   | 5.445  | 5.295  | 3.747  | 3.878  | 5.591  | 5.264  | 5.535  | 5.476  | 4.666  | 4.555  | 63959  | SLC29A1   | NM_001199116_17_-1 |
| Lpin3     | -4.981 | -4.981 | -3.977 | -4.047 | -4.878 | -4.689 | -4.986 | -4.760 | -4.981 | -4.981 | 64899  | LPIN3     | NM_001199118_2_+1  |
| Ghitm     | 3.196  | 1.725  | 3.528  | 3.649  | 3.167  | 3.803  | 3.367  | 3.138  | 1.084  | 1.284  | 66092  | GHITM     | NM_001199122_14_-1 |
| Spc25     | -4.981 | -1.083 | 0.611  | 0.478  | 1.736  | 0.602  | 1.231  | 0.444  | -0.957 | -1.902 | 66442  | SPC25     | NM_001199123_2_-1  |
| Spc25     | -0.053 | 1.728  | 3.013  | 3.144  | 4.197  | 3.791  | 3.908  | 3.211  | 1.310  | 0.812  | 66442  | SPC25     | NM_001199124_2_-1  |
| Macf1     | 5.462  | 5.323  | 4.915  | 4.508  | 6.527  | 6.283  | 5.209  | 5.280  | 5.031  | 5.357  | 11426  | NA        | NM_001199136_4_-1  |
| Macf1     | 6.487  | 6.611  | 4.896  | 4.329  | 6.479  | 6.369  | 6.316  | 6.325  | 6.318  | 6.145  | 11426  | NA        | NM_001199137_4_-1  |
| Zmynd11   | 5.270  | 5.427  | 5.343  | 5.429  | 5.466  | 5.571  | 4.990  | 5.263  | 4.675  | 5.530  | 66505  | ZMYND11   | NM_001199141_13_-1 |
| Gpsm1     | 2.005  | 2.217  | 2.499  | 0.551  | 1.793  | 1.348  | 2.088  | 1.090  | 1.188  | 0.997  | 67839  | GPSM1     | NM_001199146_2_+1  |
| Gpsm1     | -3.946 | -2.953 | -4.529 | -4.612 | -4.609 | -4.847 | -4.394 | -4.799 | -3.444 | -4.447 | 67839  | GPSM1     | NM_001199147_2_+1  |
| Sncaip    | -4.981 | -4.981 | -4.981 | -4.981 | -4.847 | -4.973 | -4.624 | -4.890 | -4.742 | -4.981 | 67847  | SNCAIP    | NM_001199151_18_+1 |
| Sncaip    | -4.981 | -4.981 | -4.981 | -4.981 | -4.609 | -4.962 | -2.491 | -3.982 | -2.340 | -4.981 | 67847  | SNCAIP    | NM_001199153_18_+1 |
| Sncaip    | -4.981 | -4.981 | -4.981 | -4.981 | -4.917 | -4.977 | -4.792 | -4.906 | -4.981 | -4.981 | 67847  | SNCAIP    | NM_001199154_18_+1 |
| Opa1      | 3.309  | 3.210  | 3.525  | 3.445  | 2.674  | 2.719  | 3.544  | 2.852  | 4.627  | 4.301  | 74143  | OPA1      | NM_001199177_16_+1 |
| Slc44a2   | 8.599  | 8.490  | 6.833  | 6.709  | 8.451  | 8.303  | 8.117  | 8.146  | 9.258  | 9.327  | 68682  | SLC44A2   | NM_001199186_9_+1  |
| Ascc1     | 1.687  | 2.337  | -0.289 | 1.390  | 2.558  | 2.607  | 2.753  | 2.329  | 1.543  | 0.725  | 69090  | ASCC1     | NM_001199187_10_+1 |
| Snx5      | 8.144  | 8.223  | 6.330  | 6.531  | 6.326  | 6.667  | 6.314  | 6.276  | 5.636  | 5.588  | 69178  | SNX5      | NM_001199188_2_-1  |
| Spag9     | 0.172  | 0.631  | 2.544  | 1.267  | 0.801  | 2.291  | 2.408  | 1.778  | 0.660  | 0.601  | 70834  | SPAG9     | NM_001199203_11_+1 |
| Spag9     | 4.201  | 4.847  | 5.454  | 4.796  | 5.195  | 4.684  | 4.926  | 4.005  | 4.561  | 4.590  | 70834  | SPAG9     | NM_001199204_11_+1 |
| Spag9     | -1.089 | 0.906  | 0.372  | -0.791 | 0.374  | -1.148 | -0.114 | -1.513 | 0.037  | 0.249  | 70834  | SPAG9     | NM_001199205_11_+1 |
| Eva1c     | -3.189 | -4.654 | -4.921 | -4.873 | -4.167 | -4.951 | -4.955 | -4.949 | -4.981 | -4.342 | 70967  | EVA1C     | NM_001199210_16_+1 |
| Asmt      | -4.981 | -4.981 | -4.973 | -4.973 | -4.932 | -4.817 | -4.981 | -4.981 | -4.981 | -4.473 | 107626 | NA        | NM_001199212_X_+1  |
| Serp1nb12 | -4.981 | -4.981 | -4.143 | -4.932 | -4.817 | -4.945 | -4.781 | -4.963 | -4.981 | -4.363 | 71869  | SERP1NB12 | NM_001199213_1_+1  |
| Agbl1     | 0.766  | -0.148 | -4.884 | -4.884 | -4.958 | -4.507 | -4.101 | -4.430 | -4.981 | -4.981 | 244071 | AGBL1     | NM_001199224_7_+1  |
| Osbp15    | 2.424  | 2.787  | 0.438  | -0.474 | 0.050  | 0.019  | 2.073  | 2.472  | -0.919 | -0.014 | 79196  | OSBPL5    | NM_001199227_7_-1  |
| Sptbn4    | -2.185 | -3.201 | -0.988 | -1.592 | -1.860 | -2.900 | -1.706 | -2.904 | -2.041 | -2.820 | 80297  | SPTBN4    | NM_001199234_7_-1  |
| Sptbn4    | -3.794 | -4.221 | -3.996 | -4.467 | -4.523 | -4.840 | -4.095 | -4.742 | -4.036 | -4.434 | 80297  | SPTBN4    | NM_001199235_7_-1  |
| Sptbn4    | -1.536 | -2.999 | -0.062 | -0.620 | -0.871 | -1.671 | -0.857 | -2.018 | -1.371 | -2.061 | 80297  | SPTBN4    | NM_001199236_7_-1  |
| Kcnp4     | -4.165 | -4.428 | -4.738 | -4.889 | -4.906 | -4.949 | -4.751 | -4.964 | -4.411 | -4.789 | 80334  | KCNIP4    | NM_001199242_5_-1  |
| Kcnp4     | -1.391 | -2.031 | -2.378 | -2.826 | -2.328 | -4.285 | -2.561 | -3.251 | -1.369 | -1.438 | 80334  | KCNIP4    | NM_001199243_5_-1  |
| Kcnp4     | -4.851 | -4.867 | -4.951 | -4.975 | -4.976 | -4.977 | -4.973 | -4.980 | -4.874 | -4.974 | 80334  | KCNIP4    | NM_001199244_5_-1  |
| Kcnp4     | -4.712 | -4.789 | -4.920 | -4.962 | -4.967 | -4.972 | -4.933 | -4.975 | -4.789 | -4.957 | 80334  | KCNIP4    | NM_001199245_5_-1  |
| Maged2    | 1.263  | 2.085  | -0.807 | 0.265  | -0.703 | 0.333  | -1.190 | -0.294 | -1.581 | 0.592  | 80884  | MAGED2    | NM_001199246_X_-1  |
| Kat5      | 4.162  | 3.867  | 3.733  | 3.065  | 4.124  | 3.430  | 3.711  | 3.481  | 3.869  | 4.046  | 81601  | KAT5      | NM_001199247_19_-1 |
| Kat5      | 2.593  | 0.785  | 0.799  | 1.529  | 0.711  | 0.580  | 1.636  | 0.850  | 2.195  | 2.123  | 81601  | KAT5      | NM_001199248_19_-1 |
| Kat5      | -1.588 | -0.567 | -1.084 | -1.453 | -0.409 | -1.362 | -0.931 | -0.648 | 0.317  | 0.336  | 81601  | KAT5      | NM_001199249_19_-1 |
| Epb41l2   | 3.118  | 3.804  | 6.016  | 6.299  | 6.025  | 6.310  | 5.926  | 5.609  | 5.056  | 5.253  | 13822  | EPB41L2   | NM_001199265_10_+1 |
| Aldoa1t1  | -3.694 | -4.981 | -4.270 | -4.776 | -4.598 | -4.844 | -4.979 | -4.975 | -2.584 | -3.067 | 353204 | NA        | NM_001199270_4_-1  |
| Slc19a1   | 1.216  | 2.106  | 0.262  | 1.066  | -2.499 | -0.603 | 0.607  | 0.275  | -1.606 | 0.500  | 20509  | SLC19A1   | NM_001199271_10_+1 |
| Gopc      | 1.120  | 0.695  | 1.273  | 2.154  | 2.624  | 2.860  | 1.680  | 2.329  | 1.617  | 2.242  | 94221  | GOPC      | NM_001199272_10_-1 |
| Mat2b     | 4.198  | 4.400  | 3.725  | 3.884  | 2.939  | 3.177  | 3.312  | 3.543  | 3.707  | 3.429  | 108645 | MAT2B     | NM_001199274_11_-1 |
| Tnip1     | 0.755  | 1.871  | 2.156  | 2.102  | 2.198  | 2.918  | 2.055  | 2.315  | 2.500  | 3.157  | 57783  | TNIP1     | NM_001199275_11_-1 |
| Tnip1     | 4.371  | 3.326  | 3.755  | 3.605  | 4.303  | 3.720  | 4.093  | 4.011  | 4.733  | 4.431  | 57783  | TNIP1     | NM_001199276_11_-1 |

|               |        |        |        |        |        |        |        |        |        |        |           |          |                         |
|---------------|--------|--------|--------|--------|--------|--------|--------|--------|--------|--------|-----------|----------|-------------------------|
| Slc43a2       | 4.291  | 4.831  | 4.334  | 4.137  | 5.900  | 5.886  | 5.991  | 5.959  | 6.180  | 6.606  | 215113    | SLC43A2  | NM_001199283_11_+_1     |
| Slc43a2       | 2.254  | 0.573  | 0.555  | 1.349  | 2.883  | 2.697  | 4.566  | 3.566  | 5.038  | 5.051  | 215113    | SLC43A2  | NM_001199284_11_+_1     |
| Tex14         | -3.004 | -3.440 | -1.066 | -2.280 | -1.486 | -1.794 | -1.141 | -0.894 | -1.083 | -0.945 | 83560     | TEX14    | NM_001199293_11_+_1     |
| Acly          | 4.810  | 5.416  | 5.228  | 5.376  | 5.323  | 5.221  | 5.732  | 5.751  | 7.075  | 7.068  | 104112    | ACLY     | NM_001199296_11_-_1     |
| Atxn1         | -4.981 | -1.887 | -0.135 | -0.742 | -0.786 | -0.493 | -0.526 | -0.175 | -4.459 | -4.066 | 20238     | ATXN1    | NM_001199304_13_-_1     |
| Atxn1         | -4.981 | -3.123 | 0.484  | 0.482  | -3.827 | -2.076 | -3.039 | -1.900 | -1.296 | -0.449 | 20238     | ATXN1    | NM_001199305_13_-_1     |
| Gm14440       | 2.898  | 1.223  | 1.984  | 0.076  | 1.480  | 0.534  | 1.720  | -1.572 | 0.675  | 0.585  | 100503353 | NA       | NM_001199308_2_+_1      |
| Gm14440       | 3.967  | 1.255  | 2.186  | -0.024 | 2.232  | -1.067 | 2.031  | -0.307 | -0.098 | -1.067 | 100503353 | NA       | NM_001199308_dup1_2_-_1 |
| Lig1          | -4.152 | -4.499 | -4.786 | -3.239 | -4.792 | -3.691 | -4.749 | -4.962 | -4.043 | -3.927 | 16881     | LIG1     | NM_001199310_7_+_1      |
| Zfp94         | -2.544 | 1.552  | -2.757 | -0.881 | -1.974 | 0.622  | -2.189 | -1.294 | -4.548 | 0.487  | 22756     | NA       | NM_001199321_7_-_1      |
| Al987944      | 5.168  | 5.203  | 4.738  | 4.903  | 4.696  | 4.782  | 4.387  | 3.874  | 3.462  | 4.045  | 233168    | NA       | NM_001199330_7_-_1      |
| Apoo          | -0.856 | -0.619 | -1.861 | -2.641 | -4.478 | -2.650 | -4.645 | -4.954 | -4.975 | -3.213 | 68316     | APOO     | NM_001199337_X_+_1      |
| Apoo          | -1.884 | 0.111  | -2.292 | -2.568 | -4.824 | -2.776 | -2.682 | -3.222 | -1.809 | -4.947 | 68316     | APOO     | NM_001199338_X_+_1      |
| Apoo          | 0.665  | 0.230  | -3.036 | -1.275 | -1.413 | -2.652 | -1.770 | -2.200 | -1.992 | -4.981 | 68316     | APOO     | NM_001199339_X_+_1      |
| Foxp3         | -4.890 | -4.219 | -4.634 | -1.719 | -4.728 | -3.182 | -4.195 | -0.149 | -4.697 | -4.838 | 20371     | FOXp3    | NM_001199347_X_+_1      |
| Foxp3         | -4.837 | -1.178 | -3.346 | -2.764 | -2.786 | -1.558 | -0.948 | -0.852 | -2.988 | -4.044 | 20371     | FOXp3    | NM_001199348_X_+_1      |
| Cd99l2        | -1.515 | -2.610 | 3.156  | 3.472  | -1.682 | -0.014 | 0.236  | 2.095  | 2.883  | 2.660  | 171486    | CD99L2   | NM_001199349_X_-_1      |
| Rpl34-ps1     | 7.901  | 0.720  | 8.405  | 3.190  | 8.137  | 3.521  | 8.459  | 4.319  | 7.411  | 3.571  | 619547    | NA       | NM_001199350_3_-_1      |
| Pnck          | 1.667  | 2.557  | -4.813 | -4.893 | -4.897 | -4.964 | -4.966 | -4.973 | -4.956 | -4.925 | 93843     | PNCK     | NM_001199351_X_-_1      |
| Pnck          | 6.784  | 7.327  | -0.610 | -0.429 | 0.135  | 1.165  | -2.806 | -1.306 | -3.042 | -2.516 | 93843     | PNCK     | NM_001199352_X_-_1      |
| Tmem164       | -1.520 | 0.096  | -0.149 | 0.080  | 0.126  | 0.689  | 1.525  | 0.244  | 1.327  | 1.273  | 209497    | TMEM164  | NM_001199357_X_+_1      |
| Tmem164       | -0.578 | -0.319 | 0.684  | 0.322  | 0.078  | -0.112 | 2.928  | 3.700  | 5.324  | 5.027  | 209497    | TMEM164  | NM_001199360_X_+_1      |
| Dnmt1         | 3.625  | 3.907  | 4.588  | 3.918  | 4.657  | 4.118  | 4.353  | 4.350  | 4.771  | 4.518  | 13433     | DNMT1    | NM_001199431_9_-_1      |
| Dnmt1         | -3.906 | -2.301 | -2.422 | -2.234 | -2.777 | -2.185 | -1.539 | -0.553 | 2.719  | 0.848  | 13433     | DNMT1    | NM_001199432_9_-_1      |
| Dnmt1         | 0.373  | -4.493 | -0.794 | -1.002 | -2.302 | -2.478 | -2.545 | -0.980 | -0.341 | -0.234 | 13433     | DNMT1    | NM_001199433_9_-_1      |
| 4931406C07Rik | -0.878 | 0.052  | -1.185 | -1.924 | -1.457 | -2.152 | -2.865 | -2.064 | -0.749 | -0.742 | 70984     | C11orf54 | NM_001199484_9_-_1      |
| 4931406C07Rik | 3.319  | 4.372  | 2.105  | 2.262  | 1.308  | 1.761  | 2.392  | 1.032  | 1.095  | 1.575  | 70984     | C11orf54 | NM_001199485_9_-_1      |
| Ei24          | 3.944  | 3.778  | 4.428  | 4.484  | 4.458  | 4.488  | 4.513  | 3.865  | 5.294  | 5.027  | 13663     | EI24     | NM_001199494_9_-_1      |
| Xylb          | -2.950 | -3.601 | -3.043 | -4.389 | -4.123 | -3.110 | -2.192 | -3.817 | -1.314 | -2.693 | 102448    | XYLB     | NM_001199568_9_+_1      |
| Pkn1          | 3.735  | 4.259  | 4.561  | 5.203  | 4.340  | 4.219  | 4.597  | 5.006  | 5.473  | 5.439  | 320795    | PKN1     | NM_001199593_8_-_1      |
| Fkbp8         | 3.198  | 3.269  | 3.076  | 3.420  | 3.029  | 3.208  | 2.691  | 2.427  | 1.930  | 2.204  | 14232     | FKBP8    | NM_001199631_8_+_1      |
| Fbxl13        | -3.058 | -2.376 | -4.269 | -4.682 | -4.896 | -4.937 | -4.978 | -4.873 | -4.981 | -4.981 | 320118    | FBXL13   | NM_001199632_5_-_1      |
| Camkk2        | -1.724 | -1.100 | -3.147 | -4.621 | -4.699 | -4.850 | -3.115 | -1.982 | -0.371 | 0.219  | 207565    | CAMKK2   | NM_001199676_5_-_1      |
| Vps37d        | 0.064  | -0.628 | 0.055  | 0.431  | -2.788 | -3.818 | -2.558 | -2.965 | -3.321 | -4.227 | 194309    | VPS37D   | NM_001199677_5_-_1      |
| Taok3         | 1.989  | 2.143  | 4.517  | 4.575  | 3.258  | 2.843  | 3.383  | 4.043  | 4.605  | 4.846  | 330177    | TAOK3    | NM_001199685_5_+_1      |
| Txlna         | 3.258  | 2.994  | 3.759  | 4.484  | 4.073  | 4.463  | 3.522  | 4.279  | 5.578  | 6.118  | 109658    | TXLNA    | NM_001199695_4_-_1      |
| Adgrb2        | -4.981 | -3.815 | -4.982 | -4.484 | -4.932 | -4.866 | -4.985 | -4.634 | -4.981 | -4.981 | 230775    | ADGRB2   | NM_001199696_4_+_1      |
| Daxx          | -1.310 | -0.593 | 0.800  | 0.462  | 0.302  | 0.590  | 1.735  | 1.090  | 2.858  | 1.560  | 13163     | DAXX     | NM_001199733_17_+_1     |
| Zfp839        | 2.704  | 0.214  | 2.669  | 1.823  | 3.430  | 2.767  | 3.412  | 2.054  | 2.936  | 1.656  | 72805     | ZNF839   | NM_001199785_12_+_1     |
| Ift43         | -0.606 | 0.882  | 2.067  | 2.089  | 0.036  | 1.289  | 0.801  | -0.046 | -0.892 | -0.107 | 76411     | IFT43    | NM_001199843_12_+_1     |
| Pfdn4         | -2.963 | -2.044 | -3.444 | -4.896 | -4.118 | -2.912 | -3.626 | -4.254 | -4.981 | -4.981 | 109054    | PFDN4    | NM_001199902_2_+_1      |
| Fam198a       | -3.189 | -3.408 | -4.978 | -4.652 | -4.211 | -3.430 | -4.898 | -4.448 | -4.981 | -3.687 | 245050    | FAM198A  | NM_001199927_9_+_1      |
| Serpina3i     | -2.851 | -4.981 | -4.255 | -1.808 | -4.948 | -3.871 | -4.925 | -3.767 | -4.981 | -4.184 | 628900    | NA       | NM_001199940_12_+_1     |
| D7Ert443e     | -0.841 | -0.663 | -4.974 | -4.980 | -4.782 | -3.946 | -4.970 | -4.981 | -4.981 | -4.981 | 71007     | C10orf90 | NM_001199941_7_-_1      |
| Serpine3      | -3.028 | -4.981 | -3.006 | -2.796 | -1.571 | -4.027 | -3.613 | -3.788 | -2.088 | -2.307 | 319433    | SERPINE3 | NM_001199945_14_+_1     |
| Dynl1f        | 3.692  | 3.666  | 2.356  | 1.609  | 1.548  | 1.309  | 1.196  | 1.496  | 1.167  | 1.177  | 100040531 | DERNL1   | NM_001199948_17_-_1     |
| Gm9839        | -3.349 | -4.981 | -4.598 | -4.980 | -4.988 | -4.760 | -4.772 | -4.975 | -4.981 | -4.981 | 408192    | NA       | NM_001199956_1_-_1      |
| Ccl27b        | -4.981 | -4.981 | -4.960 | -4.591 | -4.977 | -4.962 | -4.974 | -4.834 | -4.981 | -4.981 | 100040048 | CCL27    | NM_001199959_4_+_1      |
| Ccl27b        | -4.981 | -4.981 | -4.960 | -4.591 | -4.977 | -4.962 | -4.979 | -4.976 | -4.981 | -4.981 | 100040048 | CCL27    | NM_001199959_dup1_4_+_2 |
| Ccl27b        | -2.545 | -2.245 | -4.572 | -4.248 | -4.780 | -4.848 | -4.660 | -4.599 | -4.981 | -3.232 | 100040048 | CCL27    | NM_001199960_4_+_1      |
| Ccl27b        | -4.789 | -2.134 | -4.211 | -4.236 | -4.780 | -4.848 | -4.641 | -4.891 | -4.981 | -3.232 | 100040048 | CCL27    | NM_001199960_dup1_4_+_2 |
| Ccl27b        | -3.975 | -3.678 | -4.518 | -4.214 | -4.964 | -4.923 | -4.961 | -4.498 | -4.651 | -4.580 | 100040048 | CCL27    | NM_001199961_4_+_1      |
| Ccl27b        | -3.975 | -3.678 | -4.518 | -4.214 | -4.964 | -4.923 | -4.961 | -4.498 | -4.651 | -4.580 | 100040048 | CCL27    | NM_001199961_dup1_4_+_2 |
| Gm13306       | -3.975 | -3.678 | -4.518 | -4.214 | -4.964 | -4.923 | -4.961 | -4.498 | -4.651 | -4.580 | 100039863 | CCL27    | NM_001199962_4_+_1      |
| Gm13306       | -3.975 | -3.678 | -4.518 | -4.214 | -4.964 | -4.923 | -4.961 | -4.498 | -4.651 | -4.580 | 100039863 | CCL27    | NM_001199962_dup1_4_+_2 |
| Gm13306       | -2.545 | -2.245 | -4.572 | -4.248 | -4.780 | -4.848 | -4.660 | -4.599 | -4.981 | -3.232 | 100039863 | CCL27    | NM_001199963_4_+_1      |
| Gm13306       | -4.789 | -2.134 | -4.211 | -4.236 | -4.780 | -4.848 | -4.641 | -4.891 | -4.981 | -3.232 | 100039863 | CCL27    | NM_001199963_dup1_4_+_2 |
| Gm2506        | -4.981 | -4.981 | -4.960 | -4.591 | -4.977 | -4.962 | -4.974 | -4.834 | -4.981 | -4.981 | 100039939 | CCL27    | NM_001199965_4_+_1      |
| Gm2506        | -4.981 | -4.981 | -4.960 | -4.591 | -4.977 | -4.962 | -4.979 | -4.976 | -4.981 | -4.981 | 100039939 | CCL27    | NM_001199965_dup1_4_+_2 |
| Gm2506        | -2.545 | -2.245 | -4.572 | -4.248 | -4.780 | -4.848 | -4.660 | -4.599 | -4.981 | -3.232 | 100039939 | CCL27    | NM_001199966_4_+_1      |
| Gm2506        | -4.789 | -2.134 | -4.211 | -4.236 | -4.780 | -4.848 | -4.641 | -4.891 | -4.981 | -3.232 | 100039939 | CCL27    | NM_001199966_dup1_4_+_2 |
| Gm11127       | 7.696  | 7.076  | 7.013  | 7.376  | 6.806  | 6.654  | 6.974  | 6.878  | 6.542  | 5.526  | 100529082 | HLA-F    | NM_001199967_17_-_1     |
| Tac2          | -4.981 | -4.981 | -4.981 | -4.981 | -4.959 | -4.523 | -4.981 | -4.981 | -4.981 | -4.981 | 21334     | TAC3     | NM_001199971_10_+_1     |
| Tti2          | -1.968 | -4.259 | -2.393 | -2.238 | -2.521 | -4.787 | -4.166 | -4.823 | -4.631 | -4.906 | 234138    | TTI2     | NM_001199988_8_+_1      |
| Tmppe         | 3.255  | 3.354  | 3.794  | 4.124  | 4.075  | 4.239  | 4.012  | 4.079  | 4.635  | 4.603  | 100504715 | TMPPE    | NM_001200002_9_+_1      |
| 1700013H16Rik | -4.981 | -4.981 | -2.510 | -2.115 | -3.233 | -4.667 | -4.456 | -4.323 | -4.981 | -4.981 | 75514     | NA       | NM_001200013_X_-_1      |
| Zfp963        | 3.322  | 3.143  | 2.159  | 2.266  | 2.499  | 2.110  | 2.032  | 2.413  | 2.588  | 2.885  | 620419    | ZNF669   | NM_001200023_8_-_1      |
| Pifo          | -4.899 | -4.981 | -4.376 | -4.812 | -4.977 | -4.981 | -4.715 | -4.957 | -4.921 | -4.981 | 100503311 | PIFO     | NM_001200028_3_-_1      |
| Rubcn         | -1.754 | -2.801 | -1.539 | -2.509 | -3.852 | -0.945 | -2.835 | -1.658 | -4.103 | -3.631 | 100502698 | RUBCN    | NM_001200038_16_-_1     |
| 4930415O20Rik | -4.981 | -4.981 | -4.706 | -4.235 | -4.981 | -4.981 | -4.979 | -4.550 | -3.322 | -4.981 | 73863     | NA       | NM_001201322_15_+_1     |
| Krt83         | -4.981 | -4.981 | -4.952 | -3.296 | -4.843 | -2.595 | -3.051 | -3.166 | -1.618 | -3.853 | 100126226 | KRT83    | NM_001201323_15_-_1     |
| 5730507C01Rik | -4.134 | -3.766 | -4.375 | -4.689 | -4.587 | -4.911 | -4.294 | -4.878 | -4.274 | -4.436 | 236366    | NA       | NM_001201330_12_+_1     |
| 2410004P03Rik | 2.646  | 0.865  | -3.597 | -4.961 | -3.060 | -4.888 | -3.235 | -2.771 | 1.379  | 0.265  | 73667     | C2orf50  | NM_001201332_12_-_1     |
| 2410004P03Rik | -0.411 | -0.483 | -3.531 | -4.982 | -3.893 | -4.889 | -3.141 | -2.709 | -4.583 | -0.906 | 73667     | C2orf50  | NM_001201333_12_-_1     |

|               |        |        |        |        |        |        |        |        |        |        |           |          |                     |
|---------------|--------|--------|--------|--------|--------|--------|--------|--------|--------|--------|-----------|----------|---------------------|
| Tmem200b      | -3.843 | -1.793 | -0.630 | -1.407 | -0.715 | -1.327 | -3.035 | -3.457 | -4.981 | -4.981 | 623230    | TMEM200B | NM_001201367_4_+_1  |
| Hbb-bs        | 6.004  | 8.877  | 6.925  | 9.677  | 6.572  | 10.453 | 7.098  | 10.053 | 5.090  | 8.240  | 100503605 | HBB      | NM_001201391_7_-_1  |
| Apbb2         | -1.750 | 0.502  | -4.100 | -4.009 | -4.946 | -4.847 | -4.951 | -4.868 | -4.513 | -4.600 | 11787     | APBB2    | NM_001201413_5_-_1  |
| Apbb2         | -4.598 | -4.197 | -4.708 | -4.765 | -4.949 | -4.712 | -4.979 | -4.690 | -4.520 | -4.981 | 11787     | APBB2    | NM_001201414_5_-_1  |
| Apbb2         | 1.543  | 0.431  | -2.831 | -0.927 | -4.092 | -3.687 | -4.964 | -2.647 | -3.929 | -4.422 | 11787     | APBB2    | NM_001201415_5_-_1  |
| Apbb2         | -2.382 | -0.476 | -4.153 | -3.833 | -4.595 | -4.655 | -3.303 | -4.951 | -4.981 | -4.981 | 11787     | APBB2    | NM_001201416_5_-_1  |
| H2-Q9         | 8.979  | 7.873  | 6.061  | 6.554  | 5.726  | 5.558  | 6.575  | 6.311  | 5.762  | 4.124  | 110558    | NA       | NM_001201460_17_+_1 |
| Papss2        | 0.168  | -2.783 | 3.926  | 4.416  | 4.705  | 4.142  | 4.229  | 3.149  | 3.751  | 4.318  | 23972     | PAPSS2   | NM_001201470_19_+_1 |
| Atp9b         | 0.161  | 1.374  | 1.565  | 2.294  | 1.605  | 2.040  | 1.034  | 0.567  | 2.623  | 2.544  | 50771     | ATP9B    | NM_001201569_18_-_1 |
| Mapk8ip1      | -4.981 | -4.766 | -4.909 | -4.916 | -0.590 | -0.304 | -4.788 | -4.931 | -4.965 | -4.981 | 19099     | MAPK8IP1 | NM_001202445_2_-_1  |
| Mapk8ip1      | -4.981 | -4.684 | -4.899 | -4.920 | -0.747 | -2.188 | -4.631 | -3.455 | -4.948 | -4.981 | 19099     | MAPK8IP1 | NM_001202446_2_-_1  |
| Armxc4        | -1.187 | -2.483 | -2.763 | -3.332 | -3.530 | -3.877 | -3.217 | -3.957 | -4.190 | -4.206 | 100503043 | ARMCX4   | NM_001202500_X_+_1  |
| C1qtnf1       | -3.521 | -4.981 | -3.973 | -4.918 | -4.961 | -4.947 | -4.882 | -4.417 | -4.981 | -4.981 | 56745     | C1QTNF1  | NM_001204129_11_+_1 |
| C1qtnf1       | -1.470 | -4.981 | -3.788 | -4.243 | -4.994 | -3.391 | -4.802 | -4.891 | -4.981 | -4.981 | 56745     | C1QTNF1  | NM_001204130_11_+_1 |
| C1qtnf6       | -4.981 | -4.106 | -3.742 | -4.609 | -4.251 | -4.832 | -4.192 | -3.989 | -3.930 | -4.860 | 72709     | C1QTNF6  | NM_001204152_15_-_1 |
| C1qtnf6       | -4.981 | -2.766 | -3.385 | -3.352 | -4.684 | -3.458 | -1.414 | -2.587 | -1.690 | -0.327 | 72709     | C1QTNF6  | NM_001204153_15_-_1 |
| Tead3         | -4.981 | -4.981 | -4.980 | -4.981 | -4.981 | -4.981 | -4.980 | -4.978 | -4.981 | -4.981 | 21678     | TEAD3    | NM_001204156_17_-_1 |
| Rapgef4       | -4.981 | -4.981 | -4.965 | -4.302 | -4.461 | -4.844 | -4.234 | -4.672 | -4.539 | -4.668 | 56508     | RAPGEF4  | NM_001204165_2_+_1  |
| Rapgef4       | -4.981 | -4.981 | -4.770 | -2.175 | 0.253  | 1.871  | -1.205 | 1.639  | -2.885 | -2.412 | 56508     | RAPGEF4  | NM_001204166_2_+_1  |
| Rapgef4       | -3.563 | -3.267 | -2.049 | -0.557 | -0.485 | 0.749  | -1.477 | 0.732  | -4.257 | -4.981 | 56508     | RAPGEF4  | NM_001204167_2_+_1  |
| Spp1          | -4.255 | -4.259 | -4.511 | -3.249 | -4.771 | -4.970 | -4.361 | -4.890 | -4.423 | -4.965 | 20750     | SPP1     | NM_001204201_5_+_1  |
| Spp1          | -3.915 | -3.280 | -0.237 | -0.028 | -1.567 | -0.492 | -1.294 | -0.492 | -4.272 | -4.732 | 20750     | SPP1     | NM_001204202_5_+_1  |
| Spp1          | 0.261  | -3.618 | -3.173 | -3.105 | -3.131 | -4.951 | -2.541 | -3.000 | -2.879 | -4.795 | 20750     | SPP1     | NM_001204203_5_+_1  |
| Clec12b       | -4.981 | -4.200 | -4.608 | -4.889 | -4.901 | -4.971 | -4.611 | -4.926 | -4.981 | -4.743 | 71183     | CLEC12B  | NM_001204223_6_-_1  |
| Clec16a       | 5.239  | 5.737  | 4.332  | 4.562  | 4.311  | 4.880  | 4.166  | 4.265  | 3.818  | 3.937  | 74374     | CLEC16A  | NM_001204229_16_+_1 |
| Spp1          | -4.352 | 0.671  | 0.102  | 0.811  | -0.143 | -3.035 | -0.932 | -2.231 | -1.114 | -0.217 | 20750     | SPP1     | NM_001204233_5_+_1  |
| Clec1b        | -0.763 | -2.114 | -0.771 | -4.901 | -0.796 | -4.034 | -1.055 | -3.457 | -1.616 | -4.966 | 56760     | CLEC1B   | NM_001204239_6_+_1  |
| Clec4a3       | 2.998  | 1.812  | 1.742  | 1.700  | 5.211  | 5.458  | 8.370  | 8.611  | 8.237  | 8.966  | 73149     | NA       | NM_001204241_6_+_1  |
| Clec10a       | 7.284  | 7.837  | 0.120  | 0.754  | -1.331 | 0.629  | 4.696  | 5.307  | 3.549  | 2.912  | 17312     | CLEC10A  | NM_001204252_11_+_1 |
| Clec1b        | -4.981 | -4.981 | -4.948 | -4.948 | -4.945 | -4.945 | -3.866 | -4.913 | -2.580 | -2.517 | 56760     | CLEC1B   | NM_001204253_6_+_1  |
| Lsm2          | -4.981 | -4.981 | -3.952 | -4.895 | -4.287 | -4.977 | -4.948 | -4.926 | -4.981 | -3.113 | 27756     | LSM2     | NM_001204273_17_+_1 |
| Lsm2          | -2.825 | -4.981 | -3.905 | -4.886 | -4.744 | -3.914 | -3.332 | -4.952 | -4.981 | -2.876 | 27756     | LSM2     | NM_001204274_17_+_1 |
| Hdac7         | -4.062 | -0.746 | -2.681 | -1.775 | -2.457 | -2.236 | -0.822 | -0.074 | 0.436  | 0.329  | 56233     | HDAC7    | NM_001204275_15_-_1 |
| Hdac7         | -4.589 | -2.541 | -2.993 | -4.324 | -1.316 | -3.194 | -3.735 | -2.182 | -2.922 | 0.481  | 56233     | HDAC7    | NM_001204276_15_-_1 |
| Hdac7         | -4.321 | 0.546  | -4.589 | -1.437 | -3.116 | -1.874 | -1.994 | -3.422 | -1.978 | -1.471 | 56233     | HDAC7    | NM_001204277_15_-_1 |
| Hdac7         | 0.014  | -3.549 | -2.233 | -2.646 | -2.661 | -2.994 | -3.847 | -4.751 | -1.431 | -1.465 | 56233     | HDAC7    | NM_001204278_15_-_1 |
| Hdac7         | -3.677 | -3.552 | -3.832 | -3.265 | -4.789 | -1.413 | -2.933 | -4.710 | -4.214 | -4.495 | 56233     | HDAC7    | NM_001204279_15_-_1 |
| Hdac7         | -0.956 | -0.185 | -4.495 | -4.741 | -1.358 | -2.309 | -2.722 | -3.440 | -4.373 | -2.715 | 56233     | HDAC7    | NM_001204280_15_-_1 |
| Hdac7         | 3.068  | 2.735  | 2.174  | 1.184  | 2.624  | 2.020  | 2.652  | 2.509  | 2.923  | 1.870  | 56233     | HDAC7    | NM_001204281_15_-_1 |
| Cyp4f14       | -4.981 | -3.545 | -4.966 | -4.708 | -4.653 | -4.720 | -4.916 | -4.873 | -4.505 | -4.981 | 64385     | CYP4F12  | NM_001204333_17_-_1 |
| Cyp4f14       | -4.981 | -3.494 | -4.965 | -4.686 | -4.599 | -4.508 | -4.903 | -4.811 | -4.177 | -4.981 | 64385     | CYP4F12  | NM_001204334_17_-_1 |
| Cyp4f14       | -4.981 | -4.710 | -4.980 | -4.966 | -4.953 | -4.979 | -4.981 | -4.981 | -4.958 | -4.981 | 64385     | CYP4F12  | NM_001204335_17_-_1 |
| Cyp4f14       | -4.981 | -4.704 | -4.980 | -4.965 | -4.952 | -4.979 | -4.981 | -4.981 | -4.956 | -4.981 | 64385     | CYP4F12  | NM_001204336_17_-_1 |
| Gucy1b2       | -4.981 | -4.981 | -4.939 | -4.864 | -4.746 | -4.979 | -4.602 | -4.713 | -4.981 | -4.981 | 239134    | NA       | NM_001204340_14_-_1 |
| Kcnj11        | -4.981 | -4.981 | -4.981 | -4.981 | -4.917 | -4.796 | -4.981 | -4.981 | -4.981 | -4.981 | 16514     | KCNJ11   | NM_001204411_7_-_1  |
| Myadml2       | -4.873 | -1.747 | -3.885 | -4.488 | -4.422 | -4.351 | -4.936 | -4.509 | -2.167 | -4.634 | 68515     | MYADML2  | NM_001204820_11_-_1 |
| Set           | 4.934  | 5.160  | 6.321  | 6.454  | 6.075  | 6.046  | 6.123  | 6.135  | 6.097  | 6.131  | 56086     | SET      | NM_001204875_2_+_1  |
| 4930558K02Rik | -3.668 | -3.408 | -4.958 | -4.044 | -3.470 | -3.688 | -3.742 | -4.593 | -4.981 | -4.981 | 75368     | C1orf105 | NM_001204905_1_-_1  |
| Recql         | 2.013  | 2.849  | 0.680  | 1.350  | 2.255  | 2.043  | 1.676  | 2.297  | 1.993  | 2.260  | 19691     | RECQL    | NM_001204906_6_-_1  |
| Recql         | -0.226 | -0.165 | 0.569  | -0.468 | 1.234  | -3.249 | 1.253  | -3.087 | 2.026  | -4.742 | 19691     | RECQL    | NM_001204907_6_-_1  |
| Ifi207        | 5.895  | 4.435  | 6.469  | 4.612  | 5.517  | 3.296  | 6.704  | 5.481  | 8.058  | 7.117  | 226691    | IFI16    | NM_001204910_1_-_1  |
| Pthrhd1       | 5.345  | 4.917  | 5.794  | 5.728  | 4.482  | 4.422  | 4.939  | 4.556  | 4.221  | 4.128  | 69709     | PTRHD1   | NM_001204912_12_+_1 |
| Gm20172       | -3.563 | -4.981 | -4.078 | -4.732 | -3.991 | -4.799 | -3.750 | -4.472 | -4.981 | -4.342 | 100504323 | NA       | NM_001204913_1_-_1  |
| Reep2         | -4.981 | -3.106 | -4.456 | -3.264 | -4.536 | -4.307 | -3.633 | -4.647 | -3.507 | -3.980 | 225362    | REEP2    | NM_001204914_18_+_1 |
| Reep3         | -0.805 | -0.880 | -0.058 | 0.139  | 0.946  | 1.232  | 2.105  | 0.673  | 1.815  | 1.810  | 28193     | REEP3    | NM_001204915_10_-_1 |
| H60c          | -4.981 | -4.981 | -4.736 | -3.013 | -4.963 | -3.872 | -4.736 | -4.498 | -4.981 | -1.603 | 670558    | NA       | NM_001204916_10_-_1 |
| Reep6         | -1.901 | -1.347 | -1.560 | -1.061 | -3.602 | -1.217 | -2.085 | 0.028  | -2.822 | -3.853 | 70335     | REEP6    | NM_001204931_10_+_1 |
| Retn          | -2.647 | -4.981 | -0.500 | -3.295 | -1.467 | -2.535 | -1.483 | -1.842 | -3.043 | -4.981 | 57264     | RETN     | NM_001204959_8_+_1  |
| Brd2          | 0.594  | 1.105  | 1.455  | 2.000  | 1.939  | 2.269  | 2.437  | 2.338  | 3.305  | 3.286  | 14312     | BRD2     | NM_001204973_17_-_1 |
| Sars          | 6.620  | 6.699  | 6.156  | 6.262  | 6.388  | 6.393  | 6.252  | 6.440  | 6.350  | 6.088  | 20226     | SARS     | NM_001204979_3_-_1  |
| Cep85l        | 3.399  | 4.000  | 4.192  | 3.697  | 3.942  | 3.687  | 2.772  | 2.926  | 3.627  | 3.586  | 100038725 | CEP85L   | NM_001204983_10_-_1 |
| Jagn1         | 2.595  | 3.062  | 1.590  | 1.711  | 1.512  | 0.900  | 0.134  | 1.937  | 1.096  | 1.063  | 67767     | JAGN1    | NM_001205025_6_+_1  |
| Jarid2        | 3.725  | 3.818  | 5.915  | 5.659  | 5.483  | 5.423  | 5.654  | 5.536  | 6.163  | 6.848  | 16468     | JARID2   | NM_001205043_13_+_1 |
| Jarid2        | 4.047  | 2.943  | 5.161  | 4.805  | 4.095  | 2.656  | 4.398  | 4.697  | 5.890  | 5.777  | 16468     | JARID2   | NM_001205044_13_+_1 |
| Jdp2          | -0.409 | -1.494 | 0.015  | 0.217  | 1.245  | 0.707  | -0.456 | 0.506  | 0.019  | -0.917 | 81703     | JDP2     | NM_001205052_12_+_1 |
| Jdp2          | -0.203 | -1.463 | 2.540  | 3.371  | -0.698 | 0.611  | -0.661 | -1.014 | 0.827  | 0.419  | 81703     | JDP2     | NM_001205053_12_+_1 |
| Aga           | 1.383  | 1.122  | -1.433 | -0.991 | -1.087 | -0.179 | -0.047 | -2.198 | -1.406 | -1.155 | 11593     | AGA      | NM_001205054_8_+_1  |
| Gm14295       | 4.201  | 3.996  | 3.311  | 3.451  | 3.229  | 3.259  | 2.883  | 2.904  | 1.726  | 2.381  | 100039123 | NA       | NM_001205057_2_+_1  |
| Jkamp         | 4.099  | 4.824  | 3.027  | 2.902  | 2.620  | 3.179  | 2.962  | 2.644  | 2.530  | 3.021  | 104771    | JKAMP    | NM_001205067_12_+_1 |
| Jmjd4         | -0.280 | -0.348 | -4.532 | -1.519 | -2.086 | -1.839 | -3.599 | -1.455 | -3.212 | -4.863 | 194952    | JMJD4    | NM_001205068_11_+_1 |
| Josd2         | 1.805  | 3.591  | 0.648  | 2.412  | 0.993  | 2.863  | 1.179  | 2.685  | 0.281  | 1.651  | 66124     | JOSD2    | NM_001205070_7_+_1  |
| Josd2         | 4.642  | 4.473  | 3.873  | 4.061  | 3.629  | 4.462  | 3.599  | 4.265  | 3.163  | 3.266  | 66124     | JOSD2    | NM_001205071_7_+_1  |
| Josd2         | 3.339  | -4.327 | 2.009  | -4.871 | 2.379  | -3.909 | 2.603  | -4.773 | 1.399  | -1.553 | 66124     | JOSD2    | NM_001205072_7_+_1  |
| Josd2         | 0.485  | -4.323 | -2.491 | -4.880 | -3.141 | -4.930 | -2.100 | -4.829 | -4.777 | -4.922 | 66124     | JOSD2    | NM_001205073_7_+_1  |

|                |        |        |        |        |        |        |        |        |        |        |               |                 |                    |
|----------------|--------|--------|--------|--------|--------|--------|--------|--------|--------|--------|---------------|-----------------|--------------------|
| Trim47         | -0.844 | -2.984 | -2.565 | -2.307 | -3.172 | -2.558 | -2.269 | -0.337 | -1.625 | 0.296  | 217333        | TRIM47          | NM_001205081_11_-1 |
| Scarb1         | 2.749  | 2.775  | 3.126  | 3.195  | 2.018  | 2.318  | 3.742  | 4.315  | 5.625  | 5.255  | 20778         | SCARB1          | NM_001205082_5_-1  |
| Scarb1         | 2.243  | 2.841  | 3.843  | 3.757  | 2.785  | 2.804  | 3.672  | 4.029  | 4.332  | 4.302  | 20778         | SCARB1          | NM_001205083_5_-1  |
| Zfp994         | 3.595  | 3.767  | 3.881  | 3.656  | 3.743  | 3.632  | 3.788  | 3.394  | 3.141  | 3.868  | 240038        | NA              | NM_001205095_17_-1 |
| Record_removed | 2.205  | 2.409  | -0.497 | 1.064  | 1.105  | 1.123  | 2.303  | 2.021  | 2.478  | 3.966  | Record_remove | NA              | NM_001205101_4_+1  |
| Yes1           | -4.981 | -2.583 | -2.795 | -1.465 | -4.934 | -4.829 | -3.375 | -3.037 | -3.373 | -2.207 | 22612         | YES1            | NM_001205132_5_+1  |
| Yes1           | -4.981 | -4.981 | -4.850 | -4.468 | -4.968 | -4.869 | -4.081 | -4.965 | -4.981 | -2.616 | 22612         | YES1            | NM_001205133_5_+1  |
| Yipf1          | 1.902  | 1.706  | 0.840  | 1.007  | 0.554  | 0.087  | 1.275  | 0.526  | 0.304  | 0.584  | 230584        | YIPF1           | NM_001205156_4_+1  |
| Yipf2          | 2.619  | 3.445  | 1.980  | 2.076  | 2.368  | 2.277  | 2.304  | 2.781  | 1.939  | 2.125  | 74766         | YIPF2           | NM_001205157_9_-1  |
| Yipf2          | 4.501  | 3.963  | 2.502  | 1.556  | 1.554  | 1.299  | 2.616  | 2.963  | 2.927  | 2.601  | 74766         | YIPF2           | NM_001205158_9_-1  |
| Iffo2          | 2.914  | 2.186  | 1.739  | 1.742  | 2.115  | 1.893  | 1.638  | 1.335  | 1.954  | 1.341  | 212632        | IFFO2           | NM_001205173_4_+1  |
| Abhd4          | 1.248  | -4.266 | 0.840  | 0.506  | 0.888  | -0.385 | 0.260  | -1.497 | 1.438  | -0.854 | 105501        | ABHD4           | NM_001205181_14_+1 |
| Ppp2r2a        | -4.981 | -4.981 | -4.981 | -4.981 | -3.942 | -4.150 | -4.981 | -4.981 | -4.981 | -4.969 | 71978         | PPP2R2A         | NM_001205188_14_-1 |
| Rxrb           | 0.260  | 0.498  | 0.353  | 0.242  | 0.913  | 0.747  | 1.078  | 1.183  | 2.152  | 2.0182 | 20182         | RXRB            | NM_001205214_17_+1 |
| Rxrb           | 2.813  | 2.775  | 2.881  | 3.271  | 3.931  | 3.942  | 3.580  | 3.175  | 3.720  | 3.715  | 20182         | RXRB            | NM_001205215_17_+1 |
| Rxrb           | 3.372  | 2.979  | 4.304  | 3.842  | 4.594  | 4.244  | 4.116  | 3.764  | 4.353  | 4.367  | 20182         | RXRB            | NM_001205216_17_+1 |
| Sorbs2         | -4.981 | -4.981 | -4.972 | -4.683 | -4.916 | -4.672 | -4.769 | -4.595 | -4.981 | -3.829 | 234214        | SORBS2          | NM_001205219_8_+1  |
| Cnot1          | 2.869  | 1.906  | 2.364  | 1.554  | 2.131  | 2.894  | 3.508  | 1.841  | 2.471  | 2.538  | 234594        | CNOT1           | NM_001205226_8_-1  |
| Cyb5r2         | -4.349 | -4.981 | -4.509 | -4.737 | -4.781 | -4.974 | -4.979 | -4.970 | -4.981 | -4.695 | 320635        | CYB5R2          | NM_001205227_7_-1  |
| U2af2          | 2.974  | 2.926  | 3.808  | 3.659  | 3.788  | 3.628  | 3.613  | 3.294  | 3.685  | 3.551  | 22185         | U2AF2           | NM_001205231_7_+1  |
| Nrxn2          | 3.656  | 3.366  | -4.927 | -4.919 | -4.918 | -4.188 | -4.657 | -4.406 | -4.981 | -4.935 | 18190         | NRXN2           | NM_001205234_19_+1 |
| Nrxn2          | 1.017  | 3.317  | -4.805 | -4.046 | -3.818 | -4.968 | -4.528 | -3.784 | -4.981 | -3.444 | 18190         | NRXN2           | NM_001205235_19_+1 |
| Arhgap27       | 6.113  | 5.839  | 4.578  | 4.366  | 4.052  | 3.600  | 4.866  | 4.639  | 5.208  | 4.924  | 544817        | ARHGAP27        | NM_001205236_11_-1 |
| Parp6          | -1.189 | 0.777  | -2.981 | -0.881 | -0.767 | 0.454  | 1.049  | -0.663 | 1.322  | 1.620  | 67287         | PARP6           | NM_001205239_9_+1  |
| Kat6b          | 3.130  | 3.623  | 3.441  | 2.982  | 3.014  | 3.420  | 2.728  | 2.494  | 2.359  | 2.700  | 54169         | NA              | NM_001205241_14_+1 |
| Fasl           | -4.096 | -0.992 | -4.802 | -4.288 | 1.724  | 1.010  | 0.054  | -1.901 | -2.642 | -4.981 | 14103         | FASLG           | NM_001205243_1_-1  |
| Gm9994         | -4.981 | -3.522 | -3.503 | -2.261 | -3.156 | -3.838 | -2.943 | -4.568 | -4.981 | -3.550 | 100041596     | GAL3ST2         | NM_001205249_1_+1  |
| Thsd1          | -1.253 | -0.454 | -2.335 | -4.021 | -3.353 | -2.085 | -1.962 | -4.445 | -4.299 | -4.494 | 56229         | THSD1           | NM_001205253_8_+1  |
| Fgfr3          | -4.713 | -4.981 | -4.689 | -2.338 | -3.302 | -2.920 | -3.851 | -4.927 | -4.981 | -4.928 | 14184         | FGFR3           | NM_001205270_5_+1  |
| Tmem39a        | -2.748 | 1.043  | 1.957  | 2.517  | -4.387 | -4.335 | -4.215 | -4.855 | -4.146 | -0.322 | 67846         | TMEM39A         | NM_001205286_16_+1 |
| Tmem39a        | 0.347  | 1.598  | 2.392  | 2.709  | 0.219  | 0.305  | 0.885  | 0.449  | -2.213 | -0.196 | 67846         | TMEM39A         | NM_001205287_16_+1 |
| Slc12a3        | 0.738  | -0.107 | 0.472  | 1.125  | 0.260  | 0.844  | -2.111 | -3.368 | -3.859 | -4.981 | 20497         | SLC12A3         | NM_001205311_8_+1  |
| Tyk2           | 2.465  | 3.093  | 2.559  | 2.519  | 2.572  | 1.010  | 1.775  | 2.304  | 2.845  | 2.689  | 54721         | TYK2            | NM_001205312_9_-1  |
| Stat1          | 3.954  | 3.922  | 4.770  | 4.413  | 4.432  | 3.666  | 4.447  | 4.349  | 4.213  | 4.240  | 20846         | STAT1           | NM_001205313_1_+1  |
| Stat1          | 4.768  | 4.635  | 5.207  | 5.045  | 5.017  | 4.197  | 4.968  | 4.432  | 5.180  | 4.828  | 20846         | STAT1           | NM_001205314_1_+1  |
| Map4           | 3.211  | 3.114  | 4.519  | 5.146  | 4.309  | 3.875  | 3.267  | 3.982  | 5.213  | 5.671  | 17758         | MAP4            | NM_001205330_9_+1  |
| Map4           | -4.981 | -1.256 | 0.350  | 0.415  | -1.219 | -1.396 | -1.935 | -2.427 | -2.142 | -2.928 | 17758         | MAP4            | NM_001205331_9_+1  |
| Map4           | 4.394  | 4.850  | 5.702  | 5.388  | 4.770  | 5.040  | 4.420  | 4.329  | 4.311  | 3.821  | 17758         | MAP4            | NM_001205332_9_+1  |
| Arhgap8        | -4.981 | -4.981 | -3.793 | -3.546 | -4.528 | -4.632 | -4.974 | -4.846 | -4.981 | -4.981 | 73167         | ARHGAP8 PRR5-AF | NM_001205334_15_+1 |
| Arap3          | -4.981 | -4.340 | -4.201 | -2.200 | -4.465 | -2.365 | -1.521 | -2.173 | 0.029  | -4.158 | 106952        | ARAP3           | NM_001205336_18_-1 |
| Psat1          | 0.014  | -4.078 | -4.475 | -3.708 | -4.869 | -2.811 | -0.743 | -1.185 | 0.414  | -0.302 | 107272        | PSAT1           | NM_001205339_19_-1 |
| Sun2           | 2.698  | 0.455  | 1.694  | 2.896  | 2.137  | 2.186  | 1.279  | 1.193  | 2.404  | 2.396  | 223697        | SUN2            | NM_001205345_15_-1 |
| Sun2           | 1.709  | 2.396  | 2.478  | 1.531  | 1.889  | 1.345  | 2.064  | 1.828  | 0.125  | -0.498 | 223697        | SUN2            | NM_001205346_15_-1 |
| Gramd4         | -0.113 | -0.486 | 1.943  | 0.902  | 2.437  | 1.794  | 3.079  | 2.425  | 4.024  | 3.660  | 223752        | GRAMD4          | NM_001205353_15_+1 |
| Fhdc1          | -4.981 | -2.924 | -4.826 | -4.103 | -4.704 | -0.270 | -4.372 | -2.160 | -3.328 | -2.381 | 229474        | FHDC1           | NM_001205355_3_-1  |
| Dcun1d1        | 5.768  | 5.991  | 5.879  | 5.880  | 5.691  | 5.561  | 5.774  | 5.829  | 5.953  | 6.333  | 114893        | DCUN1D1         | NM_001205361_3_-1  |
| Dcun1d1        | 3.429  | 2.185  | 2.707  | 3.507  | 2.762  | 3.794  | 2.073  | 2.874  | 3.045  | 3.527  | 114893        | DCUN1D1         | NM_001205362_3_-1  |
| Clec9a         | 6.580  | 5.341  | 8.244  | 7.562  | -0.639 | -1.281 | 3.625  | 4.170  | 0.135  | -2.484 | 232414        | CLEC9A          | NM_001205363_6_+1  |
| Clec9a         | 1.322  | 3.075  | 1.642  | 2.073  | -3.460 | -4.956 | -4.659 | -3.470 | -4.884 | -2.840 | 232414        | CLEC9A          | NM_001205364_6_+1  |
| Clec9a         | 4.486  | 3.765  | 6.658  | 5.815  | -2.239 | -1.569 | 1.405  | 2.456  | -0.537 | -4.927 | 232414        | CLEC9A          | NM_001205365_6_+1  |
| Sept7          | 7.257  | 7.470  | 7.176  | 6.956  | 6.666  | 6.667  | 6.865  | 6.589  | 5.694  | 6.330  | 235072        | SEPT7           | NM_001205367_9_+1  |
| Casc4          | -3.596 | -1.240 | -4.610 | -4.625 | -3.140 | -4.921 | -4.706 | -4.863 | -4.657 | -4.893 | 319996        | CASC4           | NM_001205369_2_+1  |
| Casc4          | 0.230  | -2.537 | -3.842 | -0.135 | -2.647 | -1.974 | -3.894 | -1.036 | -4.234 | -4.694 | 319996        | CASC4           | NM_001205370_2_+1  |
| Casc4          | -1.846 | 0.444  | 2.103  | 1.273  | 1.966  | 1.674  | 2.469  | 1.113  | 0.954  | 1.519  | 319996        | CASC4           | NM_001205371_2_+1  |
| Actr3          | 7.209  | 7.207  | 9.454  | 9.673  | 9.252  | 9.157  | 8.969  | 9.063  | 9.377  | 9.663  | 74117         | ACTR3           | NM_001205385_1_-1  |
| Actr3          | 7.833  | 7.827  | 9.948  | 10.147 | 9.695  | 9.631  | 9.460  | 9.684  | 9.957  | 10.149 | 74117         | ACTR3           | NM_001205386_1_-1  |
| Atg16l1        | -4.059 | -3.564 | -3.404 | -4.707 | -4.627 | -4.064 | -4.025 | -4.481 | -4.351 | -4.758 | 77040         | ATG16L1         | NM_001205391_1_+1  |
| Atg16l1        | 3.400  | 3.131  | 3.866  | 3.872  | 3.803  | 3.818  | 4.042  | 3.725  | 4.356  | 4.195  | 77040         | ATG16L1         | NM_001205392_1_+1  |
| Fam234a        | 2.734  | 3.070  | 3.777  | 4.651  | 3.924  | 4.225  | 5.279  | 5.865  | 7.155  | 7.472  | 106581        | FAM234A         | NM_001206335_17_-1 |
| Gsn            | 7.993  | 8.045  | 7.895  | 8.055  | 9.354  | 9.207  | 8.461  | 8.104  | 8.018  | 7.672  | 227753        | GSN             | NM_001206367_2_+1  |
| Gsn            | 3.920  | 2.902  | 2.417  | 1.683  | 3.741  | 2.871  | 3.583  | 2.385  | 3.193  | 2.752  | 227753        | GSN             | NM_001206368_2_+1  |
| Gsn            | 5.422  | 6.275  | 4.915  | 4.392  | 6.029  | 5.675  | 5.170  | 4.695  | 3.866  | 3.658  | 227753        | GSN             | NM_001206369_2_+1  |
| Mavs           | 1.582  | 0.100  | -1.323 | -0.815 | -1.743 | -0.694 | -1.491 | 0.824  | 0.811  | 1.066  | 228607        | MAVS            | NM_001206382_2_+1  |
| Mavs           | 2.227  | 0.732  | -1.172 | -1.362 | 1.412  | -1.235 | 2.247  | 0.308  | 0.263  | 1.445  | 228607        | MAVS            | NM_001206383_2_+1  |
| Mavs           | 3.898  | 4.325  | 3.849  | 3.908  | 3.781  | 3.625  | 3.316  | 3.847  | 4.679  | 4.422  | 228607        | MAVS            | NM_001206385_2_+1  |
| Hk3            | -0.828 | -0.988 | 5.864  | 6.218  | 0.826  | -0.916 | 2.315  | 3.318  | 4.818  | 4.932  | 212032        | HK3             | NM_001206390_13_-1 |
| Hk3            | -0.255 | -2.373 | 1.697  | -2.469 | -1.756 | -0.925 | 0.277  | -0.493 | -4.319 | -1.225 | 212032        | HK3             | NM_001206391_13_-1 |
| Hk3            | -4.042 | -3.593 | -1.427 | -1.671 | -2.003 | -4.931 | -3.869 | -4.733 | -4.165 | -1.461 | 212032        | HK3             | NM_001206392_13_-1 |
| 2610528A11Rik  | -0.289 | -4.981 | -2.633 | -0.255 | 3.023  | 4.620  | 2.486  | 2.204  | -1.506 | -0.008 | 70045         | NA              | NM_001206684_14_-1 |
| Smim18         | -3.668 | -4.981 | -3.327 | -3.738 | -4.327 | -4.061 | -4.704 | -4.649 | -4.190 | -2.895 | 72632         | SMIM18          | NM_001206849_8_-1  |
| Usp44          | -3.090 | -3.315 | -4.979 | -4.979 | -3.881 | -4.053 | -4.958 | -3.318 | -4.981 | -1.912 | 327799        | USP44           | NM_001206851_10_+1 |
| Shisa8         | -4.981 | -1.653 | -2.345 | -3.111 | -2.940 | -2.794 | -2.330 | -1.865 | -2.150 | -4.981 | 435145        | SHISA8          | NM_001207021_15_-1 |
| Figl2          | -4.981 | -4.981 | -4.601 | -3.268 | -4.971 | -4.635 | -4.988 | -4.130 | -3.738 | -2.976 | 668225        | FIGL2           | NM_001214911_15_-1 |
| Rnf223         | -4.981 | -4.981 | -4.200 | -4.857 | -3.893 | -4.394 | -3.458 | -4.962 | -3.109 | -2.965 | 100045778     | RNF223          | NM_001220499_4_+1  |

|               |        |        |        |        |        |        |        |        |        |        |           |               |                         |
|---------------|--------|--------|--------|--------|--------|--------|--------|--------|--------|--------|-----------|---------------|-------------------------|
| Spx           | -4.981 | -4.981 | -2.612 | -2.832 | -3.376 | -5.001 | -2.526 | -4.972 | -4.190 | -4.981 | 319552    | SPX           | NM_001242345_6_+1       |
| Trnt1         | 1.591  | 3.567  | 3.536  | 3.497  | 3.582  | 2.870  | 3.088  | 3.644  | 2.664  | 3.407  | 70047     | TRNT1         | NM_001242358_6_+1       |
| Trnt1         | -0.237 | -1.669 | -0.340 | -0.905 | -0.975 | -2.148 | -0.853 | -1.479 | 0.585  | -0.794 | 70047     | TRNT1         | NM_001242360_6_+1       |
| Fam160a2      | -4.726 | -3.090 | -0.858 | 1.416  | -4.824 | -3.138 | -1.055 | 0.615  | 3.225  | 3.385  | 74349     | FAM160A2      | NM_001242363_7_-1       |
| Fam160a2      | -4.435 | -2.465 | 2.005  | 2.257  | -4.670 | -0.318 | 1.436  | 2.673  | 4.321  | 4.779  | 74349     | FAM160A2      | NM_001242364_7_-1       |
| Fam160a2      | -0.492 | -4.264 | -1.052 | -4.085 | -2.152 | -2.795 | -1.882 | -0.557 | -2.198 | -1.507 | 74349     | FAM160A2      | NM_001242365_7_-1       |
| F10           | -4.981 | -4.981 | -4.122 | -2.426 | -4.896 | -3.103 | 2.288  | 2.565  | 6.956  | 6.619  | 14058     | F10           | NM_001242368_8_+1       |
| Gon4l         | 3.044  | 2.882  | 4.162  | 4.282  | 4.043  | 4.295  | 3.785  | 4.099  | 4.331  | 4.610  | 76022     | GON4L         | NM_001242372_3_+1       |
| Slc4a10       | -3.791 | -3.834 | -3.874 | -4.393 | -4.498 | -4.837 | -4.275 | -4.808 | -4.626 | -4.501 | 94229     | SLC4A10       | NM_001242378_2_+1       |
| Slc4a10       | -2.112 | -2.469 | -1.829 | -2.825 | -2.202 | -3.849 | -2.082 | -4.206 | -3.986 | -3.604 | 94229     | SLC4A10       | NM_001242379_2_+1       |
| Slc4a10       | -3.983 | -4.026 | -4.077 | -4.550 | -4.649 | -4.882 | -4.454 | -4.854 | -4.712 | -4.615 | 94229     | SLC4A10       | NM_001242380_2_+1       |
| Slc4a10       | -3.135 | -3.452 | -3.168 | -3.991 | -3.670 | -4.626 | -3.553 | -4.664 | -4.487 | -4.250 | 94229     | SLC4A10       | NM_001242381_2_+1       |
| Slc4a10       | -3.771 | -3.821 | -3.858 | -4.380 | -4.485 | -4.832 | -4.260 | -4.799 | -4.619 | -4.491 | 94229     | SLC4A10       | NM_001242382_2_+1       |
| Slc4a10       | -2.060 | -2.425 | -1.711 | -2.724 | -2.049 | -3.630 | -1.933 | -4.088 | -3.966 | -3.558 | 94229     | SLC4A10       | NM_001242383_2_+1       |
| Zfp976        | -2.986 | 0.109  | -0.704 | 0.969  | -1.082 | -0.325 | -0.712 | -0.424 | -0.142 | 0.691  | 208111    | ZNF14         | NM_001242388_7_-1       |
| Trip10        | -4.684 | -4.616 | -2.984 | -2.968 | -4.907 | -4.697 | -4.071 | -4.972 | -4.811 | -1.763 | 106628    | TRIP10        | NM_001242389_17_+1      |
| Trip10        | -4.664 | -4.611 | -2.897 | -3.293 | -4.168 | -4.927 | -4.067 | -4.982 | -4.816 | -1.576 | 106628    | TRIP10        | NM_001242390_17_+1      |
| Trip10        | 1.881  | 1.287  | 3.281  | 3.363  | 2.509  | 1.662  | 2.743  | 2.661  | 2.163  | 2.871  | 106628    | TRIP10        | NM_001242391_17_+1      |
| Jmjd1c        | 7.398  | 7.507  | 5.818  | 5.955  | 6.901  | 7.246  | 5.772  | 5.734  | 4.167  | 4.791  | 108829    | JMJD1C        | NM_001242396_10_+1      |
| Miga2         | 2.005  | 1.732  | 1.660  | 1.901  | 2.192  | 2.110  | 1.404  | 2.008  | 2.596  | 2.385  | 108958    | MIGA2         | NM_001242407_2_+1       |
| Srgap1        | -2.828 | -3.426 | -3.964 | -4.252 | -4.239 | -3.996 | -3.371 | -3.536 | -4.981 | -1.902 | 117600    | SRGAP1        | NM_001242411_10_-1      |
| Susd6         | 3.489  | 2.723  | 3.141  | 3.944  | 4.198  | 4.384  | 4.428  | 4.800  | 5.793  | 6.039  | 217684    | SUSD6         | NM_001242419_12_+1      |
| Fam105a       | 6.402  | 6.414  | 8.799  | 8.877  | 9.756  | 9.862  | 9.593  | 9.444  | 8.894  | 9.250  | 223433    | FAM105A       | NM_001242423_15_-1      |
| Fam105a       | 2.654  | 2.736  | 4.828  | 4.869  | 6.043  | 6.095  | 5.787  | 5.551  | 5.058  | 5.241  | 223433    | FAM105A       | NM_001242424_15_-1      |
| Slc37a1       | 3.052  | 2.431  | 3.943  | 4.797  | 3.799  | 4.603  | 3.605  | 4.094  | 3.517  | 4.649  | 224674    | SLC37A1       | NM_001242427_17_+1      |
| Ammecr1l      | 0.522  | -1.102 | -1.019 | -1.090 | -1.280 | -1.947 | -0.424 | -4.871 | -0.515 | 0.344  | 225339    | AMMECR1L      | NM_001242430_18_+1      |
| Ncoa6         | 3.370  | 3.488  | 3.312  | 3.251  | 3.676  | 3.136  | 3.222  | 2.143  | 0.629  | 0.604  | 56406     | NA            | NM_001242558_2_-1       |
| Nit1          | 3.585  | 3.494  | 1.994  | 1.941  | 2.766  | 2.710  | 2.158  | 2.651  | 2.138  | 2.057  | 27045     | NIT1          | NM_001242580_1_-1       |
| Acin1         | 0.700  | 2.106  | -0.055 | -0.103 | -1.858 | 0.474  | -2.115 | -3.529 | -0.306 | -2.373 | 56215     | ACIN1         | NM_001242605_14_-1      |
| Acin1         | -0.411 | 0.691  | 0.657  | 0.251  | 1.224  | 0.523  | 0.131  | 0.516  | -2.824 | -1.173 | 56215     | ACIN1         | NM_001242606_14_-1      |
| Taz           | 1.731  | 1.798  | 2.180  | 1.735  | 1.693  | 0.780  | 1.847  | 1.615  | 1.934  | 1.916  | 66826     | TAZ           | NM_001242615_X_+1       |
| Taz           | 4.659  | 5.162  | 4.993  | 4.659  | 5.171  | 5.046  | 4.833  | 4.642  | 4.057  | 4.250  | 66826     | TAZ           | NM_001242616_X_+1       |
| Fam187b       | -4.981 | -4.981 | -4.962 | -4.962 | -4.981 | -4.981 | -4.891 | -4.971 | -4.981 | -4.981 | 76415     | NA            | NM_001242647_7_+1       |
| Bcl11a        | 7.100  | 7.304  | 5.965  | 5.237  | 6.668  | 6.759  | 6.023  | 5.391  | 3.298  | 4.014  | 14025     | BCL11A        | NM_001242934_11_+1      |
| Gm3317        | -4.007 | -3.759 | -4.181 | -4.808 | -4.929 | -2.969 | -4.064 | -4.748 | -4.981 | -4.981 | 666329    | NA            | NM_001242941_14_+1      |
| Gm3317        | 0.710  | -3.759 | -2.507 | -4.720 | -4.877 | -1.167 | -4.037 | -4.794 | -4.981 | -4.981 | 666329    | NA            | NM_001242941_dup1_14_+1 |
| Zfp973        | -0.582 | -0.253 | 0.417  | -0.259 | -0.497 | 0.180  | 0.255  | -0.097 | 1.877  | 2.072  | 545490    | NA            | NM_001242943_2_+1       |
| Zfp965        | 0.609  | 0.139  | -0.025 | -0.303 | -0.255 | -1.399 | -0.809 | -2.728 | -0.894 | -1.667 | 100503949 | ZNF559-ZNF177 | NM_001242944_2_+1       |
| Gm3264        | -3.661 | -4.981 | -4.532 | -4.987 | -4.982 | -1.776 | -4.976 | -4.526 | -4.981 | -4.981 | 100041306 | NA            | NM_001242945_14_+1      |
| Gm3264        | -4.528 | -4.981 | -4.532 | -4.987 | -4.955 | -4.280 | -4.970 | -4.602 | -4.981 | -4.981 | 100041306 | NA            | NM_001242945_dup1_14_+1 |
| Zfp939        | 0.812  | 0.391  | 0.627  | -0.141 | 1.633  | 1.081  | 0.741  | -0.410 | 0.410  | 0.239  | 233147    | NA            | NM_001243021_7_+1       |
| Gm4070        | 0.885  | 0.522  | -1.184 | 0.261  | 0.914  | 0.262  | 2.513  | 1.793  | 3.918  | 3.568  | 100042856 | NA            | NM_001243039_7_-1       |
| Gm4070        | 0.463  | -1.753 | -0.909 | -2.822 | 1.173  | -2.377 | 1.830  | -1.081 | 3.747  | 1.773  | 100042856 | NA            | NM_001243039_dup1_7_-2  |
| Gm4070        | 2.855  | 3.572  | 3.195  | 2.996  | 3.435  | 3.097  | 5.246  | 4.787  | 6.166  | 5.725  | 100042856 | NA            | NM_001243040_7_-1       |
| Gm4070        | 3.135  | 1.462  | 3.483  | -0.613 | 3.623  | 0.318  | 4.593  | 2.256  | 5.872  | 3.806  | 100042856 | NA            | NM_001243040_dup1_7_-2  |
| Adk           | 3.923  | 4.017  | 4.738  | 4.952  | 2.901  | 3.167  | 3.104  | 3.668  | 2.746  | 2.648  | 11534     | ADK           | NM_001243041_14_+1      |
| Ap1b1         | -4.851 | -4.712 | -2.624 | -2.697 | -2.102 | -3.774 | -4.750 | -2.713 | -1.238 | -2.846 | 11764     | AP1B1         | NM_001243043_11_+1      |
| Ap1b1         | -4.412 | -3.697 | 1.003  | -1.858 | -2.158 | -4.859 | -2.575 | -2.930 | -0.870 | -1.387 | 11764     | AP1B1         | NM_001243044_11_+1      |
| Dlg2          | -4.981 | -2.472 | -4.810 | -4.233 | -4.269 | -4.591 | -3.948 | -4.959 | -4.603 | -4.886 | 23859     | DLG2          | NM_001243046_7_+1       |
| Dlg2          | -4.981 | -4.981 | -4.231 | -2.805 | -4.981 | -4.981 | -4.979 | -4.981 | -3.375 | -2.290 | 23859     | DLG2          | NM_001243047_7_+1       |
| Arntl         | -0.842 | 1.230  | -0.868 | -1.862 | -1.791 | -1.225 | -1.516 | -0.048 | -0.898 | -2.240 | 11865     | ARNTL         | NM_001243048_7_+1       |
| Atp6v0a1      | -4.981 | -0.775 | -2.344 | -0.952 | -2.552 | -1.894 | -1.007 | -2.445 | -0.188 | -0.046 | 11975     | ATP6V0A1      | NM_001243049_11_+1      |
| Atp6v0a1      | 3.260  | 3.692  | 3.912  | 4.091  | 3.449  | 3.415  | 4.463  | 4.528  | 4.919  | 4.857  | 11975     | ATP6V0A1      | NM_001243050_11_+1      |
| Atp6v0a1      | 1.656  | 1.690  | 2.076  | 2.439  | 1.752  | 1.638  | 1.543  | 2.340  | 3.118  | 3.335  | 11975     | ATP6V0A1      | NM_001243051_11_+1      |
| Bcat2         | -4.146 | 0.015  | 1.518  | -0.807 | 0.456  | 0.759  | -0.256 | -1.873 | -4.343 | -0.599 | 12036     | BCAT2         | NM_001243052_7_+1       |
| Bcat2         | 3.328  | 1.937  | 3.457  | 3.572  | 3.862  | 3.803  | 3.761  | 2.979  | 1.673  | 3.009  | 12036     | BCAT2         | NM_001243053_7_+1       |
| Cav1          | -4.193 | -4.981 | -4.954 | -4.753 | -4.812 | -4.922 | -4.916 | -4.950 | -4.981 | -4.789 | 12389     | CAV1          | NM_001243064_6_+1       |
| Zfp433        | 2.409  | 3.764  | 2.876  | 3.072  | 2.750  | 3.037  | 3.170  | 3.336  | 3.123  | 3.455  | 73610     | ZNF433        | NM_001243067_10_+1      |
| Zfp433        | 3.253  | -2.275 | 2.726  | -4.815 | 2.563  | -3.972 | 2.679  | -4.722 | 2.374  | -4.942 | 73610     | ZNF433        | NM_001243067_dup1_10_+1 |
| Cep57l1       | 1.316  | 2.259  | 0.862  | -0.365 | 2.080  | 2.016  | 1.084  | 1.482  | -0.387 | -4.457 | 103268    | CEP57L1       | NM_001243074_10_-1      |
| Cep57l1       | 0.156  | -0.959 | -2.203 | -3.569 | -3.502 | -4.788 | 0.444  | -2.404 | -0.953 | -4.635 | 103268    | CEP57L1       | NM_001243075_10_-1      |
| A630095N17Rik | -4.981 | -4.751 | -4.963 | -4.968 | -4.979 | -4.979 | -4.981 | -4.981 | -4.981 | -4.981 | 381272    | NA            | NM_001243090_1_-1       |
| A630095N17Rik | 1.056  | 0.913  | -3.168 | -3.611 | -4.929 | -4.069 | -4.974 | -4.978 | -4.981 | -4.981 | 381272    | NA            | NM_001243091_1_-1       |
| Gm11837       | -1.665 | -0.160 | 4.543  | 4.951  | -3.356 | -0.774 | -3.105 | -0.559 | -4.981 | -3.165 | 100038514 | C8orf88       | NM_001243100_4_+1       |
| Al182371      | -3.146 | -1.179 | -2.032 | -3.062 | -2.102 | -3.337 | -2.779 | -2.654 | -1.410 | -2.934 | 98870     | NA            | NM_001243102_2_-1       |
| Al182371      | -2.774 | -0.836 | -1.572 | -2.561 | -1.593 | -2.734 | -2.334 | -2.097 | -3.154 | -2.535 | 98870     | NA            | NM_001243103_2_-1       |
| 2010315B03Rik | 2.338  | 2.199  | 2.894  | 2.833  | 3.683  | 3.585  | 3.272  | 3.645  | 2.820  | 3.840  | 630836    | NA            | NM_001243117_9_-1       |
| 2010315B03Rik | 1.969  | 2.135  | 1.604  | 2.404  | 2.402  | 2.503  | 3.234  | 1.556  | 1.905  | 1.827  | 630836    | NA            | NM_001243118_9_-1       |
| 2010315B03Rik | 3.446  | 2.803  | 2.202  | 2.261  | 3.287  | 3.292  | 3.379  | 3.063  | 1.875  | 3.472  | 630836    | NA            | NM_001243119_9_-1       |
| Fam193a       | 3.931  | 4.053  | 4.096  | 3.977  | 4.458  | 4.174  | 4.064  | 3.914  | 4.005  | 3.794  | 231128    | FAM193A       | NM_001243123_5_+1       |
| Tspan2        | 2.689  | 1.941  | 2.677  | 2.792  | 3.301  | 3.147  | 2.217  | 0.736  | 1.139  | 1.732  | 70747     | TSPAN2        | NM_001243132_3_+1       |
| Zfp981        | -3.189 | -3.529 | -4.928 | -3.913 | -4.934 | -1.877 | -4.076 | -3.132 | -4.981 | -4.484 | 100041433 | ZNF616        | NM_001243138_4_+1       |
| Zfp981        | -4.981 | -0.797 | -4.985 | -2.983 | -4.917 | -3.888 | -4.872 | -2.858 | -4.981 | -0.537 | 100041433 | ZNF616        | NM_001243139_4_+1       |
| Alg11         | 1.437  | 3.041  | 1.997  | 1.555  | 2.504  | 1.808  | 1.667  | 1.925  | 2.759  | 3.365  | 207958    | ALG11         | NM_001243161_8_+1       |

|           |        |        |        |        |        |        |        |        |        |        |           |              |                    |
|-----------|--------|--------|--------|--------|--------|--------|--------|--------|--------|--------|-----------|--------------|--------------------|
| Sox5      | -4.981 | -2.591 | -4.981 | -4.981 | -3.752 | -4.050 | -4.550 | -4.132 | -4.981 | -4.981 | 20678     | SOX5         | NM_001243163_6_-1  |
| Gm13288   | -3.553 | -4.981 | -4.981 | -4.981 | -4.981 | -4.981 | -4.267 | -4.931 | -4.981 | -4.981 | 668208    | NA           | NM_001243167_4_+1  |
| Serpinh6a | 5.016  | 4.831  | 3.808  | 3.288  | 3.876  | 3.955  | 4.058  | 3.858  | 3.588  | 3.396  | 20719     | SERPINH6     | NM_001243192_13_-1 |
| Gimap4    | -1.819 | -4.816 | -2.831 | -2.364 | -3.837 | -2.378 | -3.597 | -0.890 | -1.345 | -4.573 | 107526    | GIMAP4       | NM_001243199_6_+1  |
| Gimap4    | -4.957 | -1.593 | -4.140 | -3.173 | -4.752 | -4.954 | -2.869 | -1.375 | -4.853 | -4.510 | 107526    | GIMAP4       | NM_001243200_6_+1  |
| Gimap4    | -4.981 | -4.981 | -2.011 | -1.470 | -2.807 | -0.647 | -1.924 | 0.743  | -3.903 | -3.190 | 107526    | GIMAP4       | NM_001243201_6_+1  |
| Cacfd1    | 2.415  | 1.710  | -0.141 | -0.393 | 0.133  | -1.158 | 0.317  | -0.019 | 1.695  | 1.533  | 381356    | CACFD1       | NM_001243239_2_+1  |
| Cacfd1    | 3.701  | 3.214  | 2.292  | 2.163  | 2.625  | 1.982  | 2.542  | 2.444  | 2.943  | 2.749  | 381356    | CACFD1       | NM_001243240_2_+1  |
| Ncmap     | -4.981 | -3.315 | -4.145 | -4.201 | -4.150 | -3.646 | -3.211 | -3.526 | -3.814 | -4.981 | 230822    | NCMAP        | NM_001243305_4_-1  |
| Ncmap     | -4.981 | -4.981 | -4.981 | -4.981 | -4.981 | -4.981 | -4.981 | -4.981 | -4.981 | -4.981 | 230822    | NCMAP        | NM_001243306_4_-1  |
| Ccdc85b   | -0.415 | 0.441  | -0.843 | -0.505 | -0.926 | -0.762 | -0.469 | -2.256 | 0.291  | -1.401 | 240514    | CCDC85B      | NM_001243307_19_-1 |
| Mif4gd    | 5.205  | 4.728  | 5.706  | 5.680  | 6.297  | 5.924  | 5.886  | 5.771  | 4.641  | 4.397  | 69674     | MIF4GD       | NM_001243584_11_-1 |
| Mif4gd    | -1.342 | -0.368 | -0.236 | -1.351 | 0.302  | 0.651  | 0.183  | -1.577 | -1.207 | -0.709 | 69674     | MIF4GD       | NM_001243586_11_-1 |
| Mif4gd    | -0.922 | -0.447 | 0.999  | 1.179  | 1.744  | 1.458  | 1.298  | 0.843  | -0.291 | 0.662  | 69674     | MIF4GD       | NM_001243587_11_-1 |
| Itch      | 1.706  | 3.537  | 3.952  | 4.529  | 4.517  | 5.811  | 4.104  | 4.656  | 3.938  | 5.123  | 16396     | ITCH         | NM_001243712_2_+1  |
| Jagn1     | 2.839  | 2.479  | 1.385  | 0.965  | 2.122  | 1.202  | 1.222  | 0.013  | 0.250  | 0.153  | 67767     | JAGN1        | NM_001243739_6_+1  |
| C87436    | 5.013  | 5.060  | 4.074  | 4.078  | 4.689  | 4.646  | 4.802  | 4.814  | 4.709  | 4.428  | 232196    | C2orf42      | NM_001243741_6_+1  |
| C87436    | -3.318 | -3.365 | -3.379 | -4.583 | -4.492 | -4.826 | -4.177 | -4.893 | -4.102 | -4.529 | 232196    | C2orf42      | NM_001243742_6_+1  |
| Rassf1    | 2.958  | 3.707  | 1.651  | 0.523  | -2.819 | -1.599 | -0.163 | 1.180  | 1.433  | 1.509  | 56289     | RASSF1       | NM_001243748_9_+1  |
| Pde2a     | -2.716 | 0.399  | -0.751 | 0.894  | 0.935  | 3.124  | 1.569  | 5.190  | 5.542  | 6.525  | 207728    | PDE2A        | NM_001243757_7_+1  |
| Pde2a     | -2.671 | -1.525 | -1.135 | -3.874 | -2.889 | -4.445 | -1.525 | 0.580  | -2.835 | -2.081 | 207728    | PDE2A        | NM_001243758_7_+1  |
| Ciita     | 3.808  | 2.992  | 6.816  | 6.944  | 7.023  | 7.034  | 6.449  | 6.057  | 1.754  | 2.797  | 12265     | CIITA        | NM_001243760_16_+1 |
| Ciita     | 0.926  | 0.259  | 1.201  | 0.366  | 2.981  | 3.254  | 1.089  | 1.113  | 1.294  | 1.506  | 12265     | CIITA        | NM_001243761_16_+1 |
| Clcn5     | 1.509  | 1.869  | -0.081 | -0.286 | -1.866 | -0.820 | -0.161 | -0.589 | 1.480  | 2.149  | 12728     | CLCN5        | NM_001243762_X_-1  |
| Cdc42     | 4.645  | 4.402  | 4.837  | 4.734  | 5.101  | 4.658  | 4.767  | 4.378  | 3.769  | 3.653  | 12540     | NA           | NM_001243769_4_-1  |
| Esrrg     | -4.981 | -4.981 | -4.716 | -4.408 | -0.126 | 2.143  | -4.455 | -3.277 | -4.981 | -4.981 | 26381     | ESRRG        | NM_001243792_1_+1  |
| Fam124a   | -4.981 | -4.981 | -4.978 | -4.008 | -4.961 | -4.961 | -4.962 | -4.947 | -3.750 | -4.981 | 629059    | FAM124A      | NM_001243857_14_+1 |
| BC024978  | -1.140 | -4.507 | -0.392 | -1.779 | -1.246 | -3.118 | -1.239 | -4.156 | -2.355 | -2.043 | 414069    | C19orf54     | NM_001243888_7_+1  |
| Gm14322   | 1.799  | 1.873  | -2.796 | 0.736  | -1.646 | 1.285  | -1.309 | 0.602  | -3.249 | 0.909  | 626802    | NA           | NM_001243903_2_+1  |
| Zfp383    | 0.958  | 1.862  | -0.691 | 0.322  | -0.090 | 0.751  | -0.682 | 0.289  | -0.412 | 1.119  | 73729     | ZNF383       | NM_001243908_7_+1  |
| Trim34b   | -2.807 | 3.263  | -0.200 | 2.584  | -0.200 | 2.851  | -0.991 | 2.024  | -1.346 | 2.650  | 434218    | TRIM6-TRIM34 | NM_001243916_7_+1  |
| Ube2m     | 5.047  | 4.799  | 5.262  | 5.168  | 4.851  | 4.451  | 4.426  | 4.566  | 4.343  | 4.483  | 22192     | UBE2M        | NM_001243968_7_-1  |
| Pax6      | -4.981 | -4.442 | -4.774 | -4.895 | -4.841 | -4.958 | -4.980 | -4.980 | -4.611 | -4.981 | 18508     | PAX6         | NM_001244198_2_+1  |
| Pax6      | -4.981 | -4.593 | -4.844 | -4.934 | -4.903 | -4.968 | -4.980 | -4.981 | -4.711 | -4.981 | 18508     | PAX6         | NM_001244200_2_+1  |
| Pax6      | -4.981 | -4.264 | -4.705 | -4.860 | -4.781 | -4.947 | -4.978 | -4.980 | -4.519 | -4.981 | 18508     | PAX6         | NM_001244201_2_+1  |
| Pax6      | -4.981 | -4.867 | -4.951 | -4.977 | -4.974 | -4.979 | -4.981 | -4.981 | -4.888 | -4.981 | 18508     | PAX6         | NM_001244202_2_+1  |
| B4galnt1  | 0.676  | 0.358  | 0.325  | -2.512 | -0.098 | -1.660 | 0.807  | -1.100 | -0.446 | -0.474 | 14421     | B4GALNT1     | NM_001244617_10_+1 |
| B4galnt1  | 1.908  | 1.932  | 1.030  | 1.434  | 2.696  | 2.581  | 2.532  | 2.942  | 2.883  | 3.016  | 14421     | B4GALNT1     | NM_001244618_10_+1 |
| Gm9573    | -4.981 | -4.981 | -3.261 | -3.481 | -4.130 | -4.962 | -2.297 | -4.247 | -4.981 | -4.981 | 672682    | NA           | NM_001244654_17_-1 |
| St18      | -4.407 | -4.981 | -4.654 | -4.811 | -3.234 | -4.845 | -2.825 | -4.694 | -4.981 | -4.981 | 240690    | ST18         | NM_001244692_1_+1  |
| St18      | -4.058 | -4.981 | -4.040 | -4.654 | -1.717 | -2.102 | -2.185 | -3.447 | -4.981 | -4.981 | 240690    | ST18         | NM_001244693_1_+1  |
| Faiml     | -4.981 | -4.981 | -4.007 | -3.603 | -3.175 | -4.532 | -4.454 | -4.891 | -4.981 | -4.981 | 623459    | NA           | NM_001244762_9_-1  |
| Celf1     | 3.245  | 1.735  | 1.711  | 3.226  | 2.672  | 3.296  | 2.832  | 2.308  | 3.115  | 3.782  | 13046     | NA           | NM_001244891_2_+1  |
| Celf1     | 5.503  | 5.694  | 6.174  | 6.003  | 6.491  | 6.336  | 6.269  | 6.255  | 6.470  | 6.621  | 13046     | NA           | NM_001244903_2_+1  |
| Sall2     | -1.902 | -2.533 | 2.235  | 1.604  | 3.537  | 3.179  | 3.478  | 2.123  | 0.913  | 0.895  | 50524     | SALL2        | NM_001244916_14_-1 |
| Gtf2ird1  | -4.375 | -4.479 | -2.687 | -0.558 | -0.824 | -1.487 | -1.643 | -2.525 | -4.492 | -1.859 | 57080     | GTF2IRD1     | NM_001244936_5_-1  |
| Lcp1      | 3.543  | 0.589  | 6.732  | 5.133  | 7.440  | 6.319  | 7.277  | 5.775  | 6.541  | 5.508  | 18826     | LCP1         | NM_001247984_14_+1 |
| Zkscan8   | 2.451  | 2.539  | 0.207  | 1.124  | 1.750  | 0.299  | 2.112  | 2.383  | 1.966  | 1.508  | 93681     | ZKSCAN8      | NM_001251833_13_-1 |
| Zkscan8   | -0.702 | -2.127 | -1.906 | -2.680 | -1.118 | -1.954 | -1.907 | -1.456 | -2.836 | -2.123 | 93681     | ZKSCAN8      | NM_001251834_13_-1 |
| Ggnbp1    | -0.219 | -0.070 | -3.822 | -2.276 | -1.603 | -1.779 | -0.498 | -1.358 | -2.379 | -1.920 | 70772     | NA           | NM_001251881_17_+1 |
| Gm38425   | -2.151 | -2.895 | -4.970 | -4.970 | -3.959 | -3.191 | -4.338 | -4.644 | -2.834 | -4.342 | 100503280 | NA           | NM_001251890_X_-1  |
| Ly6c1     | 1.854  | 4.816  | -3.684 | -1.705 | -4.368 | -4.058 | -3.394 | -2.569 | -0.483 | 2.459  | 17067     | NA           | NM_001252055_15_-1 |
| Ly6c1     | -3.298 | -1.526 | -4.848 | -4.984 | -4.962 | -4.962 | -4.970 | -4.974 | -0.080 | -1.743 | 17067     | NA           | NM_001252056_15_-1 |
| Ly6c1     | -0.468 | 2.677  | -4.988 | -2.933 | -4.492 | -4.894 | -3.925 | -3.375 | -1.343 | 0.781  | 17067     | NA           | NM_001252057_15_-1 |
| Ly6c1     | -2.504 | -0.725 | -4.964 | -4.957 | -4.977 | -4.987 | -4.922 | -4.952 | -4.814 | -4.941 | 17067     | NA           | NM_001252058_15_-1 |
| Cacna1a   | -0.420 | -1.616 | -1.203 | -0.816 | 0.000  | 0.674  | -0.368 | -1.110 | -0.479 | -0.882 | 12286     | CACNA1A      | NM_001252059_8_+1  |
| Cacna1a   | 0.735  | -2.533 | -1.372 | -1.390 | -1.099 | -4.853 | -1.408 | -1.273 | -1.663 | -2.734 | 12286     | CACNA1A      | NM_001252060_8_+1  |
| Cacna1a   | -3.382 | -0.384 | -3.579 | -4.295 | -4.521 | -4.563 | -3.889 | -2.165 | -4.285 | -3.982 | 12286     | CACNA1A      | NM_001252061_8_+1  |
| Gga3      | 4.602  | 4.738  | 4.817  | 4.658  | 4.693  | 4.794  | 4.586  | 4.300  | 4.083  | 4.427  | 260302    | GGA3         | NM_001252067_11_-1 |
| Dnah7a    | -2.073 | -3.267 | -4.495 | -4.976 | -4.248 | -3.935 | -4.583 | -4.805 | -4.981 | -4.981 | 627872    | DNAH7        | NM_001252070_1_-1  |
| Zswim8    | 2.627  | 1.643  | 2.430  | 1.638  | 1.478  | 2.222  | 1.061  | 2.037  | 1.716  | 0.066  | 268721    | ZSWIM8       | NM_001252081_14_+1 |
| Zswim8    | 1.548  | 1.127  | 0.917  | 2.474  | 0.974  | 0.010  | 1.125  | -0.021 | -2.152 | 1.660  | 268721    | ZSWIM8       | NM_001252082_14_+1 |
| Zfp384    | 3.871  | 3.725  | 4.282  | 4.068  | 4.444  | 4.134  | 4.039  | 4.099  | 4.673  | 4.843  | 269800    | ZNF384       | NM_001252083_6_+1  |
| Rbmxl1    | 5.379  | 5.934  | 5.437  | 5.379  | 5.423  | 5.420  | 5.419  | 5.148  | 3.971  | 3.852  | 19656     | NA           | NM_001252089_8_-1  |
| Etfbkmt   | -0.280 | -0.338 | -4.254 | -4.562 | -4.915 | -4.866 | -3.159 | -3.483 | -4.664 | -1.476 | 320204    | ETFBKMT      | NM_001252094_6_+1  |
| Etfbkmt   | 2.438  | 1.997  | 0.426  | -0.563 | 0.878  | 0.136  | 1.512  | 1.295  | 2.002  | 1.711  | 320204    | ETFBKMT      | NM_001252095_6_+1  |
| Etfbkmt   | -3.931 | -2.902 | -4.172 | -2.482 | -4.132 | -4.822 | -1.697 | -4.744 | -1.190 | -4.655 | 320204    | ETFBKMT      | NM_001252096_6_+1  |
| Etfbkmt   | -4.773 | -2.996 | -2.128 | -4.310 | -4.546 | -2.272 | -1.164 | -3.546 | -2.358 | -0.773 | 320204    | ETFBKMT      | NM_001252097_6_+1  |
| Lrch1     | 5.697  | 5.692  | 5.458  | 5.050  | 5.247  | 5.586  | 4.996  | 4.976  | 5.262  | 5.359  | 380916    | LRCH1        | NM_001252132_14_-1 |
| Tmem106c  | 5.515  | 5.695  | 3.539  | 4.440  | 3.057  | 3.798  | 3.047  | 3.745  | 2.936  | 3.643  | 380967    | TMEM106C     | NM_001252153_15_+1 |
| Epn2      | -4.505 | -4.461 | -4.859 | -4.907 | -4.911 | -4.967 | -4.892 | -4.806 | -4.981 | -4.842 | 13855     | EPN2         | NM_001252188_11_-1 |
| Epn2      | -1.982 | -1.029 | -3.045 | -1.662 | -1.352 | -1.052 | -2.965 | -1.033 | -2.831 | -3.649 | 13855     | EPN2         | NM_001252189_11_-1 |
| Eya1      | -0.524 | 0.400  | -3.671 | -4.860 | -4.027 | -4.938 | -2.595 | -2.640 | -2.370 | -2.467 | 14048     | EYA1         | NM_001252192_1_-1  |
| Amz2      | 4.866  | 4.538  | 3.720  | 4.311  | 3.962  | 4.079  | 3.695  | 3.906  | 3.370  | 3.607  | 13929     | NA           | NM_001252193_11_+1 |

|              |        |        |        |        |        |        |        |        |        |        |        |          |                     |
|--------------|--------|--------|--------|--------|--------|--------|--------|--------|--------|--------|--------|----------|---------------------|
| Map4k4       | -3.853 | -2.861 | -2.236 | 0.472  | -4.383 | -3.375 | -3.171 | -1.650 | -3.661 | -0.894 | 26921  | MAP4K4   | NM_001252200_1_+_1  |
| Map4k4       | 3.475  | 4.133  | 4.362  | 4.376  | 2.722  | 2.716  | 4.013  | 3.742  | 4.716  | 4.203  | 26921  | MAP4K4   | NM_001252201_1_+_1  |
| Map4k4       | 3.861  | 4.030  | 3.310  | 3.200  | 0.679  | 1.694  | 1.138  | 1.142  | 4.024  | 3.533  | 26921  | MAP4K4   | NM_001252202_1_+_1  |
| Kcnj16       | -3.753 | -3.938 | -3.805 | -4.395 | -1.705 | -4.796 | -1.835 | -4.541 | -3.911 | -4.387 | 16517  | KCNJ16   | NM_001252207_11_+_1 |
| Kcnj16       | -3.497 | -3.772 | -3.586 | -3.996 | -4.227 | -4.738 | -3.426 | -4.476 | -3.731 | -4.234 | 16517  | KCNJ16   | NM_001252208_11_+_1 |
| Kcnj16       | -3.394 | -3.668 | 1.397  | -1.750 | 3.936  | 3.865  | 1.620  | 1.411  | -3.637 | -3.836 | 16517  | KCNJ16   | NM_001252209_11_+_1 |
| Kcnj16       | -2.886 | -3.444 | -2.428 | -2.447 | -1.502 | -0.889 | -1.927 | -3.336 | -3.087 | -2.969 | 16517  | KCNJ16   | NM_001252210_11_+_1 |
| Rpl31        | 6.863  | 7.015  | 3.889  | 3.745  | 3.112  | 3.440  | 2.865  | 3.173  | 1.305  | 1.289  | 114641 | RPL31    | NM_001252218_1_+_1  |
| Rpl31        | 7.700  | 7.589  | 5.076  | 5.114  | 4.350  | 4.705  | 4.458  | 4.314  | 2.502  | 2.702  | 114641 | RPL31    | NM_001252219_1_+_1  |
| Nbr1         | -3.896 | 0.048  | 1.843  | 0.201  | 0.788  | 0.627  | 0.021  | 0.910  | 0.954  | 0.697  | 17966  | NBR1     | NM_001252220_11_+_1 |
| Nbr1         | 4.220  | 3.852  | 3.968  | 3.606  | 3.722  | 3.531  | 3.916  | 3.791  | 4.665  | 4.409  | 17966  | NBR1     | NM_001252222_11_+_1 |
| Nbr1         | 3.667  | 1.256  | 3.398  | 2.318  | 3.283  | 2.452  | 2.431  | 0.044  | 4.438  | 4.052  | 17966  | NBR1     | NM_001252223_11_+_1 |
| Nf2          | 0.969  | 0.198  | -0.044 | 0.750  | 1.836  | -0.576 | 0.436  | -0.206 | 0.423  | 2.008  | 18016  | NF2      | NM_001252250_11_-_1 |
| Nf2          | -4.981 | -3.104 | -2.714 | -4.277 | -3.620 | -4.412 | -4.369 | -2.348 | -2.056 | -2.112 | 18016  | NF2      | NM_001252251_11_-_1 |
| Nf2          | -2.385 | -0.264 | 0.438  | -0.336 | 0.489  | -0.805 | -0.342 | -3.825 | -0.858 | 0.396  | 18016  | NF2      | NM_001252252_11_-_1 |
| Nf2          | -4.981 | -1.687 | -1.434 | -2.022 | -1.858 | -1.872 | -1.479 | -0.680 | -2.092 | -3.023 | 18016  | NF2      | NM_001252253_11_-_1 |
| Npm1         | -3.874 | -3.807 | -4.383 | -4.610 | -4.729 | -4.921 | -4.339 | -4.880 | -4.452 | -4.647 | 18148  | NPM1     | NM_001252260_11_-_1 |
| Npm1         | 5.217  | 5.095  | 5.470  | 5.532  | 5.082  | 5.046  | 4.864  | 5.030  | 3.970  | 3.913  | 18148  | NPM1     | NM_001252261_11_-_1 |
| Ica1         | -1.549 | -2.895 | -1.602 | -2.010 | -4.719 | -3.239 | -2.744 | -3.342 | 0.611  | -1.730 | 15893  | ICA1     | NM_001252266_6_-_1  |
| Ogdh         | 1.081  | 1.682  | 1.388  | -0.211 | 0.762  | -0.562 | 1.330  | 0.295  | -1.470 | -2.618 | 18293  | OGDH     | NM_001252282_11_+_1 |
| Ogdh         | 1.019  | 1.046  | 2.290  | 1.714  | 2.123  | 1.918  | 2.890  | 2.876  | 3.157  | 2.502  | 18293  | OGDH     | NM_001252283_11_+_1 |
| Ogdh         | 1.841  | -0.233 | 1.856  | -0.188 | 2.086  | 1.756  | 1.986  | 2.094  | 2.995  | 2.003  | 18293  | OGDH     | NM_001252287_11_+_1 |
| Ogdh         | 2.220  | 1.613  | 3.577  | 3.376  | 3.894  | 4.479  | 3.927  | 3.700  | 5.873  | 5.558  | 18293  | OGDH     | NM_001252288_11_+_1 |
| Mest         | -4.853 | -4.604 | -4.877 | -4.859 | -4.944 | -4.975 | -4.752 | -4.882 | -4.776 | -4.964 | 17294  | MEST     | NM_001252292_6_+_1  |
| Mest         | -3.048 | -0.561 | -2.214 | -2.266 | -2.797 | -3.684 | -1.972 | -2.809 | -2.330 | -4.938 | 17294  | MEST     | NM_001252293_6_+_1  |
| Ncor1        | 5.281  | 4.638  | 5.528  | 5.854  | 5.608  | 5.707  | 5.721  | 5.647  | 5.868  | 6.163  | 20185  | NCOR1    | NM_001252313_11_-_1 |
| Shmt2        | 3.845  | 3.804  | 2.666  | 3.029  | 2.420  | 2.094  | 2.695  | 2.764  | 0.827  | 1.885  | 108037 | SHMT2    | NM_001252316_10_-_1 |
| Pan2         | 3.114  | 2.375  | 4.488  | 4.267  | 4.540  | 4.262  | 3.821  | 3.661  | 4.353  | 4.153  | 103135 | PAN2     | NM_001252326_10_+_1 |
| Pan2         | -0.421 | -4.272 | -1.505 | -1.215 | -1.816 | -0.147 | -0.793 | -2.814 | -0.033 | -0.487 | 103135 | PAN2     | NM_001252327_10_+_1 |
| Sept8        | 1.111  | 0.907  | -0.243 | 2.060  | 1.070  | 1.451  | 0.666  | 2.316  | 1.429  | 2.783  | 20362  | SEPT8    | NM_001252332_11_+_1 |
| Sept8        | 0.821  | 1.102  | 1.111  | 0.886  | 0.444  | 0.395  | 0.453  | 0.512  | 0.987  | 1.614  | 20362  | SEPT8    | NM_001252333_11_+_1 |
| Syt1         | -4.981 | -3.854 | -4.977 | -4.977 | -4.963 | -4.900 | -4.964 | -4.951 | -4.981 | -4.981 | 20979  | SYT1     | NM_001252341_10_-_1 |
| Syt1         | -4.981 | -2.469 | -4.952 | -4.952 | -4.784 | -3.499 | -4.933 | -4.902 | -4.981 | -4.981 | 20979  | SYT1     | NM_001252342_10_-_1 |
| Rundc3a      | -4.981 | -4.981 | -0.499 | -1.272 | -1.324 | -3.823 | -1.557 | -2.936 | -1.521 | -0.606 | 51799  | RUND3A   | NM_001252347_11_+_1 |
| Mybpc1       | -4.981 | -4.981 | -4.528 | -4.718 | -4.935 | -4.967 | -3.871 | -4.236 | -4.981 | -4.981 | 109272 | MYBPC1   | NM_001252372_10_-_1 |
| Nt5c3        | 4.951  | 5.034  | 3.759  | 3.894  | 3.544  | 4.133  | 3.682  | 3.391  | 3.668  | 3.316  | 107569 | NT5C3A   | NM_001252374_6_-_1  |
| Irf5         | 4.775  | 4.901  | 4.929  | 5.295  | 4.185  | 4.161  | 4.514  | 4.695  | 5.882  | 5.892  | 27056  | IRF5     | NM_001252382_6_+_1  |
| Slc25a19     | 2.305  | 3.613  | 1.910  | 3.259  | 2.124  | 2.603  | 2.227  | 2.710  | 1.391  | 2.332  | 67283  | SLC25A19 | NM_001252384_11_-_1 |
| Slc25a19     | 0.294  | 0.289  | -0.763 | -1.351 | -0.068 | -1.947 | -0.454 | -0.250 | -0.096 | -2.848 | 67283  | SLC25A19 | NM_001252394_11_-_1 |
| Slc25a19     | -2.276 | -1.547 | -4.720 | -0.942 | -1.399 | -2.083 | -2.999 | -4.214 | -0.876 | -0.926 | 67283  | SLC25A19 | NM_001252395_11_-_1 |
| Slc25a19     | 1.334  | 0.228  | 0.774  | -1.007 | 1.441  | 0.604  | 1.619  | -4.492 | -0.344 | -3.974 | 67283  | SLC25A19 | NM_001252396_11_-_1 |
| Tle2         | 1.897  | 2.124  | -3.146 | -1.822 | 1.186  | 1.424  | 1.083  | 0.602  | -1.111 | 0.472  | 21886  | TLE2     | NM_001252401_10_+_1 |
| Rpain        | -0.799 | 0.128  | -0.789 | -1.208 | -1.798 | -1.298 | -1.335 | -1.442 | -0.706 | -0.170 | 69723  | RPAIN    | NM_001252413_11_+_1 |
| Rpain        | 1.465  | 2.589  | 0.152  | 0.462  | 0.590  | 1.171  | 0.981  | 1.163  | 1.221  | 1.108  | 69723  | RPAIN    | NM_001252414_11_+_1 |
| Rpain        | -1.328 | 1.099  | -3.731 | -2.449 | -3.842 | -1.351 | -1.639 | -3.202 | -3.225 | -1.440 | 69723  | RPAIN    | NM_001252415_11_+_1 |
| Dlg1         | 1.216  | 2.483  | 2.918  | 1.844  | 2.102  | 1.598  | 1.409  | -0.665 | 1.636  | 2.244  | 13383  | DLG1     | NM_001252433_16_+_1 |
| Dlg1         | -1.668 | -0.172 | 1.181  | 0.803  | -1.110 | -0.343 | 0.472  | -4.372 | -2.053 | -3.014 | 13383  | DLG1     | NM_001252434_16_+_1 |
| Dlg1         | 3.443  | 3.564  | 3.109  | 3.067  | 3.188  | 3.162  | 3.404  | 2.830  | 2.529  | 2.265  | 13383  | DLG1     | NM_001252435_16_+_1 |
| Dlg1         | 2.862  | 3.482  | 3.303  | 2.685  | 3.878  | 4.225  | 2.587  | 1.984  | -0.030 | -4.962 | 13383  | DLG1     | NM_001252436_16_+_1 |
| Mgrn1        | 3.238  | 3.251  | 2.659  | 2.780  | 3.002  | 2.602  | 2.393  | 2.444  | 3.598  | 3.131  | 17237  | MGRN1    | NM_001252437_16_+_1 |
| D16Ertdd472e | 4.015  | 4.350  | 3.054  | 3.235  | 2.975  | 3.031  | 3.147  | 3.065  | 2.607  | 2.868  | 67102  | C21orf91 | NM_001252438_16_-_1 |
| D16Ertdd472e | 3.148  | 3.282  | 2.618  | 2.363  | 2.687  | 2.375  | 2.405  | 2.300  | 1.313  | 0.643  | 67102  | C21orf91 | NM_001252439_16_-_1 |
| D16Ertdd472e | 2.950  | 3.644  | 0.953  | 1.870  | 1.250  | 1.698  | 1.308  | 1.178  | 1.172  | 0.300  | 67102  | C21orf91 | NM_001252440_16_-_1 |
| Phldb2       | -4.981 | -4.981 | -4.976 | -4.943 | -4.981 | -4.953 | -4.576 | -4.950 | -4.981 | -4.981 | 208177 | PHLDB2   | NM_001252442_16_-_1 |
| Tfg          | -4.688 | -4.540 | -1.692 | -1.559 | -3.938 | -4.932 | -1.509 | -2.565 | -0.961 | -2.656 | 21787  | TFG      | NM_001252443_16_-_1 |
| Ppil2        | 5.224  | 5.455  | 5.449  | 5.698  | 5.885  | 5.949  | 5.619  | 5.482  | 5.300  | 5.469  | 66053  | PPIL2    | NM_001252444_16_-_1 |
| Ppil2        | 5.731  | 5.731  | 5.266  | 5.250  | 5.245  | 4.937  | 5.094  | 5.212  | 5.295  | 5.283  | 66053  | PPIL2    | NM_001252445_16_-_1 |
| Vrk2         | 1.454  | 0.571  | 2.250  | 0.699  | 0.707  | 0.270  | 0.767  | -2.287 | 1.112  | -1.013 | 69922  | VRK2     | NM_001252447_11_-_1 |
| Strada       | 0.796  | 0.539  | 1.754  | 0.909  | 1.772  | 1.347  | -1.877 | 1.273  | 1.698  | 1.027  | 72149  | STRADA   | NM_001252448_11_-_1 |
| Strada       | -1.756 | -4.530 | -4.675 | -4.884 | -4.900 | -4.948 | -4.503 | -4.907 | -4.572 | -4.912 | 72149  | STRADA   | NM_001252449_11_-_1 |
| Cldnd1       | 1.580  | -1.064 | -0.767 | -1.540 | -1.735 | -1.813 | -1.094 | -1.736 | -1.810 | -1.752 | 224250 | CLDND1   | NM_001252450_16_+_1 |
| Cldnd1       | 0.462  | -2.140 | -2.364 | -3.060 | -3.473 | -3.260 | -2.537 | -3.381 | -3.045 | -3.381 | 224250 | CLDND1   | NM_001252451_16_+_1 |
| Pou5f1       | -3.843 | -3.267 | -3.915 | -3.943 | -4.061 | -4.592 | -2.981 | -4.446 | -3.022 | -3.882 | 18999  | POU5F1   | NM_001252452_17_+_1 |
| Ptprs        | 5.060  | 6.065  | 4.125  | 4.464  | 2.801  | 3.787  | 3.249  | 2.526  | 2.623  | 1.987  | 19280  | PTPRS    | NM_001252453_17_-_1 |
| Epn1         | -1.581 | -0.755 | -1.395 | -0.923 | -1.916 | -0.370 | -0.290 | -2.680 | 0.323  | -0.566 | 13854  | EPN1     | NM_001252454_7_+_1  |
| Ptprs        | 3.507  | 4.714  | 0.493  | 0.424  | 1.692  | 0.007  | 0.165  | -1.505 | -1.331 | 0.357  | 19280  | PTPRS    | NM_001252455_17_-_1 |
| Ptprs        | 6.631  | 6.155  | 4.123  | 4.151  | 3.382  | 2.808  | 3.348  | 3.472  | 2.237  | 2.815  | 19280  | PTPRS    | NM_001252456_17_-_1 |
| Ddx39b       | 6.306  | 6.104  | 6.121  | 6.219  | 6.406  | 6.466  | 6.091  | 5.986  | 4.927  | 5.092  | 53817  | DDX39B   | NM_001252457_17_+_1 |
| Prkd2        | 2.204  | 1.858  | 2.508  | 2.210  | 4.651  | 4.053  | 3.841  | 4.023  | 2.893  | 2.865  | 101540 | PRKD2    | NM_001252458_7_+_1  |
| Cyfi2        | 0.541  | -0.309 | 0.494  | 1.398  | 1.545  | 2.147  | 2.878  | 2.865  | 2.419  | 3.304  | 76884  | CYFI2    | NM_001252459_11_-_1 |
| Cyfi2        | 0.877  | 0.361  | 2.924  | 2.937  | 1.874  | 2.139  | 2.124  | 1.983  | 2.375  | 2.085  | 76884  | CYFI2    | NM_001252460_11_-_1 |
| Mlst8        | -1.554 | -1.521 | -1.439 | -1.790 | -1.549 | -1.990 | 0.008  | -0.676 | 2.455  | 1.273  | 56716  | MLST8    | NM_001252463_17_-_1 |
| Mlst8        | 1.675  | 0.110  | 3.004  | -0.813 | 2.765  | 0.101  | 1.102  | 0.601  | 2.216  | 0.626  | 56716  | MLST8    | NM_001252464_17_-_1 |
| Mlst8        | -0.023 | 0.148  | -0.626 | -1.109 | 0.055  | -3.579 | -0.584 | -0.459 | 1.841  | -3.672 | 56716  | MLST8    | NM_001252465_17_-_1 |

|               |        |        |        |        |        |        |        |        |        |        |        |          |                     |
|---------------|--------|--------|--------|--------|--------|--------|--------|--------|--------|--------|--------|----------|---------------------|
| Ranbp3        | 3.864  | 3.784  | 4.382  | 4.195  | 3.702  | 3.284  | 3.453  | 2.979  | 3.410  | 3.646  | 71810  | RANBP3   | NM_001252466_17_+_1 |
| Ranbp3        | 1.064  | 1.607  | 0.831  | 0.519  | 1.889  | 1.681  | 1.358  | 0.207  | 1.859  | 1.967  | 71810  | RANBP3   | NM_001252467_17_+_1 |
| Bag6          | -4.038 | -0.894 | -4.261 | -4.607 | -4.436 | -4.688 | -2.804 | -4.327 | -4.668 | -4.695 | 224727 | BAG6     | NM_001252468_17_+_1 |
| Bag6          | 2.555  | 2.530  | 3.025  | 2.682  | 3.112  | 2.838  | 3.315  | 2.781  | 3.697  | 3.628  | 224727 | BAG6     | NM_001252469_17_+_1 |
| Cpt1c         | 0.068  | -0.260 | -2.654 | -1.612 | -1.848 | -2.662 | -2.821 | -2.696 | -2.561 | -2.573 | 78070  | CPT1C    | NM_001252470_7_-_1  |
| Sh3gl1        | 0.863  | 1.367  | 0.860  | 0.285  | 1.055  | -0.605 | -0.379 | -0.589 | 0.927  | -0.297 | 20405  | SH3GL1   | NM_001252471_17_-_1 |
| Cd84          | 1.511  | 1.573  | 0.833  | 1.024  | 2.139  | 0.516  | 2.615  | 2.377  | 4.360  | 3.354  | 12523  | CD84     | NM_001252472_1_+_1  |
| Tjap1         | 0.053  | 1.795  | -1.427 | 1.721  | -1.427 | 2.124  | -3.200 | 2.005  | 1.506  | 3.063  | 74094  | TJAP1    | NM_001252473_17_-_1 |
| Tjap1         | 1.016  | -3.660 | 1.481  | -4.302 | 1.935  | -2.230 | 2.217  | -3.030 | 2.148  | 0.826  | 74094  | TJAP1    | NM_001252474_17_-_1 |
| Tjap1         | 0.761  | -0.008 | 1.665  | -0.919 | 1.887  | 0.401  | 0.639  | -1.072 | 1.778  | -0.163 | 74094  | TJAP1    | NM_001252475_17_-_1 |
| Prmt1         | 5.789  | 5.620  | 5.954  | 6.057  | 5.871  | 5.736  | 5.406  | 5.711  | 4.910  | 4.806  | 15469  | PRMT1    | NM_001252476_7_-_1  |
| Prmt1         | -4.981 | -4.981 | -2.978 | -2.376 | -4.914 | -4.914 | -3.888 | -4.738 | -4.981 | -3.359 | 15469  | PRMT1    | NM_001252477_7_-_1  |
| Slc30a6       | 0.901  | 1.640  | -1.671 | -0.434 | -1.585 | -0.273 | -0.897 | -0.145 | -1.815 | -0.165 | 210148 | SLC30A6  | NM_001252478_17_+_1 |
| Cmtm7         | 4.279  | 4.150  | 1.907  | 2.069  | 0.520  | 0.822  | 2.002  | 2.765  | 3.972  | 3.396  | 102545 | CMTM7    | NM_001252479_9_-_1  |
| March2        | 5.881  | 6.049  | 6.091  | 6.111  | 5.438  | 5.819  | 5.785  | 5.879  | 6.136  | 5.853  | 224703 | MARCH2   | NM_001252480_17_-_1 |
| Smad2         | -0.841 | 0.111  | -1.380 | -1.362 | -0.372 | 0.355  | -2.195 | 0.429  | -0.713 | 1.039  | 17126  | SMAD2    | NM_001252481_18_+_1 |
| Inca1         | -4.535 | -4.790 | -4.639 | -4.925 | -4.895 | -3.986 | -4.821 | -4.962 | -4.934 | -4.791 | 103844 | INCA1    | NM_001252482_11_-_1 |
| Inca1         | -0.910 | -0.020 | -2.743 | -4.823 | -3.643 | -3.188 | -3.845 | -4.957 | -4.877 | -3.244 | 103844 | INCA1    | NM_001252483_11_-_1 |
| Inca1         | 0.855  | -1.089 | -0.815 | -1.084 | 0.220  | -0.868 | -1.179 | -2.848 | -3.750 | -3.386 | 103844 | INCA1    | NM_001252484_11_-_1 |
| Inca1         | -4.926 | -4.981 | -4.518 | -3.277 | -4.128 | -4.976 | -4.967 | -4.717 | -4.981 | -4.976 | 103844 | INCA1    | NM_001252485_11_-_1 |
| Usp33         | 3.522  | 3.170  | 3.764  | 4.019  | 3.116  | 2.887  | 3.566  | 4.165  | 5.064  | 5.173  | 170822 | USP33    | NM_001252486_3_+_1  |
| Catsper3      | -4.869 | -4.981 | -4.914 | -4.966 | -4.972 | -4.978 | -4.961 | -4.978 | -4.944 | -4.969 | 76856  | CATSPER3 | NM_001252487_13_+_1 |
| Catsper3      | -3.090 | -4.981 | -3.463 | -3.411 | -2.347 | -3.201 | -4.410 | -3.317 | -3.189 | -3.498 | 76856  | CATSPER3 | NM_001252488_13_+_1 |
| Osbpl1a       | -4.816 | -4.049 | -4.981 | -4.975 | -4.953 | -4.976 | -4.620 | -4.941 | -3.440 | -4.978 | 64291  | OSBPL1A  | NM_001252489_18_-_1 |
| Osbpl1a       | -2.670 | -4.027 | -4.980 | -4.964 | -4.924 | -4.962 | -4.228 | -4.905 | -2.077 | -4.981 | 64291  | OSBPL1A  | NM_001252490_18_-_1 |
| Osbpl1a       | -4.927 | -4.662 | -3.205 | -2.617 | -4.116 | -4.544 | -4.974 | -4.976 | -4.981 | -4.981 | 64291  | OSBPL1A  | NM_001252491_18_-_1 |
| Osbpl1a       | -4.981 | -4.769 | -4.942 | -4.777 | -4.884 | -4.974 | -4.904 | -3.715 | -4.827 | -4.981 | 64291  | OSBPL1A  | NM_001252492_18_-_1 |
| Osbpl1a       | -3.149 | -4.981 | -4.895 | -4.206 | -2.660 | -3.408 | -4.287 | -4.669 | -3.322 | -1.708 | 64291  | OSBPL1A  | NM_001252493_18_-_1 |
| Rapgef6       | 2.219  | 0.928  | 1.207  | 1.206  | 0.678  | 0.851  | 0.942  | 1.629  | -0.819 | -0.346 | 192786 | RAPGEF6  | NM_001252494_11_+_1 |
| Rbbp8         | -3.727 | -4.490 | -2.095 | -4.901 | -4.925 | -4.972 | -4.625 | -4.954 | -4.278 | -4.517 | 225182 | RBBP8    | NM_001252495_18_+_1 |
| Rapgef6       | 4.832  | 5.294  | 4.419  | 3.478  | 3.707  | 4.050  | 3.855  | 3.931  | 2.059  | 3.365  | 192786 | RAPGEF6  | NM_001252496_11_+_1 |
| Rapgef6       | 0.574  | 1.075  | 2.014  | 2.433  | 1.808  | 1.667  | 1.538  | 1.313  | 0.433  | -0.370 | 192786 | RAPGEF6  | NM_001252497_11_+_1 |
| Rapgef6       | 0.562  | 0.113  | 0.675  | 0.826  | 0.637  | 0.379  | 0.062  | -1.298 | -0.268 | 0.351  | 192786 | RAPGEF6  | NM_001252498_11_+_1 |
| Aftph         | -0.481 | -3.784 | -0.998 | -3.044 | -2.777 | -4.873 | -2.977 | -3.574 | -0.602 | -1.245 | 216549 | AFTPH    | NM_001252503_11_-_1 |
| St6gal1       | 4.050  | 3.613  | 4.580  | 4.204  | 4.794  | 4.939  | 4.536  | 4.346  | 2.379  | 4.099  | 20440  | ST6GAL1  | NM_001252505_16_+_1 |
| St6gal1       | -0.064 | -4.343 | -1.697 | -2.423 | -3.610 | -3.931 | -3.052 | -2.249 | -2.923 | -3.648 | 20440  | ST6GAL1  | NM_001252506_16_+_1 |
| D430019H16Rik | -0.278 | 0.650  | -4.422 | -2.147 | -2.742 | -2.924 | -4.978 | -3.525 | -4.981 | -3.210 | 268595 | NA       | NM_001252508_12_+_1 |
| Ehbp1         | -3.108 | -2.261 | -0.031 | 0.271  | -2.455 | -1.621 | -1.457 | -0.545 | -3.283 | 0.753  | 216565 | EHBP1    | NM_001252515_11_-_1 |
| Hfm1          | -4.981 | -4.981 | -3.875 | -4.556 | -3.673 | -4.120 | -4.635 | -4.953 | -4.981 | -4.149 | 330149 | HFM1     | NM_001252516_5_-_1  |
| Nono          | 4.251  | 4.223  | 4.595  | 4.485  | 3.906  | 3.227  | 4.259  | 2.892  | 3.508  | 3.335  | 53610  | NONO     | NM_001252518_X_+_1  |
| Zfp82         | -0.170 | 0.185  | -3.156 | -3.203 | -0.131 | -2.233 | -4.288 | -0.851 | -0.412 | -4.527 | 330502 | ZFP82    | NM_001252519_7_-_1  |
| Picalm        | 2.310  | 0.637  | 2.116  | 0.818  | 1.020  | 1.095  | 1.955  | 1.642  | 1.649  | 2.404  | 233489 | PICALM   | NM_001252520_7_+_1  |
| Picalm        | 2.439  | 3.648  | 2.324  | 2.497  | 3.136  | 3.303  | 3.597  | 3.579  | 3.737  | 3.936  | 233489 | PICALM   | NM_001252521_7_+_1  |
| Picalm        | 1.951  | 2.793  | 0.348  | 2.570  | 1.169  | 1.144  | -0.053 | 1.344  | 1.918  | 2.848  | 233489 | PICALM   | NM_001252522_7_+_1  |
| Picalm        | 1.670  | 3.137  | -0.272 | 0.251  | -2.765 | -2.226 | -0.483 | -3.596 | -3.340 | -2.150 | 233489 | PICALM   | NM_001252523_7_+_1  |
| Picalm        | 5.682  | 5.512  | 4.997  | 5.057  | 4.966  | 5.435  | 5.751  | 5.652  | 5.760  | 6.259  | 233489 | PICALM   | NM_001252524_7_+_1  |
| Pqbp1         | 3.129  | 3.157  | 2.384  | 2.113  | 2.629  | 2.639  | 1.893  | 2.293  | 1.543  | 2.025  | 54633  | PQBP1    | NM_001252528_X_-_1  |
| Pqbp1         | 6.733  | 6.683  | 5.289  | 5.507  | 5.607  | 5.624  | 5.505  | 5.494  | 4.492  | 4.313  | 54633  | PQBP1    | NM_001252529_X_-_1  |
| Slco2b1       | -4.207 | -4.461 | -0.365 | -2.673 | -0.592 | -1.353 | -0.073 | 0.673  | -1.646 | -4.757 | 101488 | SLCO2B1  | NM_001252530_7_-_1  |
| Slco2b1       | -4.005 | -4.292 | -4.935 | -4.794 | -4.730 | -4.932 | -4.736 | -4.867 | -4.916 | -4.643 | 101488 | SLCO2B1  | NM_001252531_7_-_1  |
| Llg12         | -3.762 | -3.361 | -2.961 | -4.130 | -3.027 | -4.852 | -4.078 | -4.545 | -3.877 | -1.635 | 217325 | LLGL2    | NM_001252532_11_+_1 |
| Cacnb2        | -4.470 | 1.012  | -4.838 | -1.024 | -3.476 | -3.500 | -4.339 | -3.776 | -2.497 | -4.981 | 12296  | CACNB2   | NM_001252533_2_+_1  |
| Ciz1          | 1.585  | 2.373  | 2.307  | 2.625  | 1.686  | 1.586  | 1.761  | 2.211  | 2.809  | 2.337  | 68379  | CIZ1     | NM_001252534_2_+_1  |
| Ciz1          | 0.863  | 1.546  | -1.492 | -0.223 | -0.458 | -2.571 | -0.776 | -1.468 | -1.755 | -0.645 | 68379  | CIZ1     | NM_001252536_2_+_1  |
| Ciz1          | 1.362  | 1.494  | 2.562  | 1.848  | 0.294  | 0.871  | 0.630  | 0.406  | 2.272  | 2.675  | 68379  | CIZ1     | NM_001252537_2_+_1  |
| Ciz1          | 2.869  | 2.536  | 2.613  | 2.885  | 3.357  | 2.909  | 2.938  | 3.205  | 2.768  | 3.035  | 68379  | CIZ1     | NM_001252538_2_+_1  |
| Ndor1         | -4.137 | -3.582 | -4.147 | -4.796 | -4.835 | -3.487 | -4.018 | -4.851 | -4.439 | -4.677 | 78797  | NDOR1    | NM_001252541_2_-_1  |
| Ndor1         | 0.523  | -0.322 | 0.829  | 0.638  | 1.083  | -0.043 | -0.813 | 0.128  | 1.706  | 1.576  | 78797  | NDOR1    | NM_001252542_2_-_1  |
| Sec23b        | 0.680  | 0.667  | -0.043 | 0.422  | -2.567 | -0.422 | 0.342  | 1.090  | 1.080  | 0.759  | 27054  | SEC23B   | NM_001252543_2_+_1  |
| Sec23b        | 5.279  | 5.482  | 5.064  | 5.180  | 4.047  | 4.630  | 4.107  | 4.805  | 5.529  | 5.736  | 27054  | SEC23B   | NM_001252544_2_+_1  |
| Sec23b        | 1.158  | 2.342  | 1.447  | 2.476  | 1.187  | 1.805  | 1.744  | -0.645 | 1.485  | 1.954  | 27054  | SEC23B   | NM_001252545_2_+_1  |
| Sh2d3c        | -4.572 | -0.751 | -1.339 | -1.721 | -2.903 | -3.333 | -1.971 | -1.527 | -4.448 | -0.363 | 27387  | SH2D3C   | NM_001252547_2_+_1  |
| BC017643      | 3.837  | 4.436  | 3.705  | 4.204  | 3.747  | 4.139  | 4.226  | 4.328  | 4.953  | 5.020  | 217370 | C17orf62 | NM_001252548_11_-_1 |
| BC017643      | 4.979  | 5.311  | 4.673  | 4.633  | 4.866  | 4.308  | 4.752  | 4.507  | 4.462  | 4.109  | 217370 | C17orf62 | NM_001252549_11_-_1 |
| BC017643      | 0.474  | 0.706  | -2.553 | -1.869 | -2.273 | 0.731  | 0.454  | -4.722 | -0.471 | -0.104 | 217370 | C17orf62 | NM_001252550_11_-_1 |
| Folr1         | -4.981 | -4.981 | -4.977 | -4.970 | -4.955 | -4.979 | -4.976 | -4.973 | -4.937 | -4.893 | 14275  | FOLR1    | NM_001252552_7_-_1  |
| Folr1         | -4.981 | -4.981 | -4.981 | -4.588 | -4.751 | -4.914 | -4.903 | -4.908 | -4.629 | -4.361 | 14275  | FOLR1    | NM_001252553_7_-_1  |
| Folr1         | -4.981 | -4.981 | -4.975 | -3.274 | -4.088 | -4.396 | -4.823 | -4.830 | -4.076 | -4.102 | 14275  | FOLR1    | NM_001252554_7_-_1  |
| Gstz1         | -1.901 | -4.281 | -2.008 | -4.701 | -2.255 | -3.504 | -4.829 | -4.066 | -1.724 | -4.945 | 14874  | GSTZ1    | NM_001252555_12_+_1 |
| Gstz1         | -0.020 | 0.896  | -0.905 | -2.618 | -1.234 | -2.310 | -0.817 | 0.315  | -0.539 | -2.172 | 14874  | GSTZ1    | NM_001252556_12_+_1 |
| Mllt10        | 3.942  | 3.261  | 3.396  | 3.573  | 4.270  | 4.185  | 3.753  | 3.153  | 3.651  | 2.641  | 17354  | MLLT10   | NM_001252559_2_+_1  |
| Mllt10        | 3.360  | 3.770  | 3.163  | 2.781  | 2.997  | 3.449  | 2.858  | 3.116  | 2.973  | 2.828  | 17354  | MLLT10   | NM_001252561_2_+_1  |
| Rad51b        | -4.981 | -4.981 | -2.327 | -2.703 | -2.172 | -4.410 | -2.765 | -3.258 | -4.981 | -4.316 | 19363  | RAD51B   | NM_001252562_12_+_1 |
| Oprl1         | -4.981 | -4.981 | -1.634 | -4.502 | -3.777 | -4.760 | -2.518 | -4.946 | -3.346 | -4.981 | 18389  | OPRL1    | NM_001252565_2_+_1  |

|               |        |        |        |        |        |        |        |        |        |        |        |            |                     |
|---------------|--------|--------|--------|--------|--------|--------|--------|--------|--------|--------|--------|------------|---------------------|
| Sez6l2        | -4.260 | -0.354 | -4.909 | -4.954 | -3.347 | -3.873 | -3.812 | -4.840 | -4.638 | -4.610 | 233878 | SEZ6L2     | NM_001252566_7_+_1  |
| Sez6l2        | -0.745 | -0.394 | -2.126 | -1.345 | -2.112 | -2.390 | -3.820 | -3.183 | -0.712 | -2.896 | 233878 | SEZ6L2     | NM_001252567_7_+_1  |
| Phyhd1        | -4.981 | -4.981 | -4.870 | -3.173 | -4.967 | -4.954 | -4.917 | -4.900 | -4.808 | -4.678 | 227696 | PHYHD1     | NM_001252568_2_+_1  |
| Serpina1a     | -4.981 | -4.981 | -4.930 | -4.978 | -4.981 | -4.981 | -4.981 | -4.981 | -4.953 | -4.981 | 20700  | SERPINA1   | NM_001252569_12_-_1 |
| Phyhd1        | 2.486  | 0.826  | 0.946  | 0.711  | 0.230  | -0.245 | 1.598  | 1.959  | -0.100 | 0.406  | 227696 | PHYHD1     | NM_001252570_2_+_1  |
| Phyhd1        | -4.802 | -4.750 | -4.928 | -4.929 | -4.779 | -2.672 | -3.356 | -2.991 | -4.750 | -2.601 | 227696 | PHYHD1     | NM_001252571_2_+_1  |
| Cttn          | -1.505 | -2.756 | -1.980 | 0.297  | -1.439 | -0.641 | -1.190 | 0.411  | -1.989 | 0.211  | 13043  | CTTN       | NM_001252572_7_-_1  |
| Slc35c2       | -1.250 | 1.791  | 2.176  | 2.585  | 0.989  | 1.700  | -0.428 | 0.078  | -0.221 | -0.391 | 228875 | SLC35C2    | NM_001252573_2_-_1  |
| Slc35c2       | 3.202  | -1.664 | 3.437  | -0.907 | 2.988  | -0.987 | 2.659  | -0.594 | 0.129  | -3.051 | 228875 | SLC35C2    | NM_001252574_2_-_1  |
| Slc35c2       | 1.816  | 0.263  | 1.313  | -1.237 | -0.507 | -3.660 | 0.758  | -1.905 | 0.610  | -2.305 | 228875 | SLC35C2    | NM_001252575_2_-_1  |
| Klra4         | -0.359 | 1.480  | -1.715 | -4.871 | -4.568 | -5.000 | -1.925 | -4.826 | -3.718 | -4.981 | 16635  | NA         | NM_001252577_6_-_1  |
| Sulf2         | -4.310 | -2.143 | 4.112  | 4.046  | 4.692  | 4.844  | 4.833  | 5.000  | 4.817  | 5.471  | 72043  | SULF2      | NM_001252578_2_-_1  |
| Sulf2         | -2.202 | -2.260 | -0.093 | -0.120 | 1.362  | 0.837  | 1.149  | 0.538  | 2.400  | 2.013  | 72043  | SULF2      | NM_001252579_2_-_1  |
| Usp8          | -1.247 | -4.013 | -0.112 | 0.175  | -0.574 | -1.900 | -1.350 | -2.318 | 0.421  | 0.283  | 84092  | USP8       | NM_001252580_2_+_1  |
| Zfp410        | -1.037 | -1.088 | -2.444 | -2.135 | -1.484 | -1.894 | -2.450 | -2.871 | -1.008 | -0.799 | 52708  | ZNF410     | NM_001252582_12_+_1 |
| Zfp410        | -0.113 | -1.646 | -1.799 | -2.109 | -2.938 | -3.320 | -2.084 | -3.124 | -1.437 | -2.239 | 52708  | ZNF410     | NM_001252583_12_+_1 |
| Zmynd8        | 5.635  | 5.561  | 4.431  | 4.414  | 4.981  | 5.007  | 4.821  | 4.325  | 4.070  | 4.408  | 228880 | ZMYND8     | NM_001252584_2_-_1  |
| Zmynd8        | 4.337  | 3.137  | 2.369  | 2.148  | 1.975  | 1.672  | 1.137  | 1.041  | 2.174  | 1.318  | 228880 | ZMYND8     | NM_001252585_2_-_1  |
| Zmynd8        | 4.632  | 5.612  | 4.145  | 4.713  | 4.560  | 5.513  | 3.996  | 4.648  | 1.536  | 3.158  | 228880 | ZMYND8     | NM_001252587_2_-_1  |
| Tspan4        | 2.676  | 1.449  | 3.399  | 3.281  | 3.472  | 3.296  | 3.979  | 4.059  | 1.702  | 1.320  | 64540  | TSPAN4     | NM_001252588_7_+_1  |
| Cars          | 3.532  | 4.132  | 4.747  | 4.713  | 3.849  | 3.906  | 3.709  | 4.175  | 4.226  | 4.000  | 27267  | CARS       | NM_001252593_7_-_1  |
| Irf7          | 5.621  | 4.788  | 3.975  | 2.646  | 3.520  | 1.891  | 3.875  | 3.212  | 5.040  | 3.571  | 54123  | IRF7       | NM_001252600_7_-_1  |
| Irf7          | 6.722  | 6.216  | 5.070  | 4.020  | 4.857  | 3.610  | 5.524  | 4.497  | 6.239  | 4.953  | 54123  | IRF7       | NM_001252601_7_-_1  |
| Fut8          | -4.335 | 0.148  | -0.933 | -2.225 | -1.566 | -2.543 | -2.209 | -1.761 | -4.458 | -4.739 | 53618  | FUT8       | NM_001252614_12_+_1 |
| Fut8          | -4.828 | -4.538 | -4.534 | -4.961 | -4.723 | -4.925 | -4.959 | -3.467 | -2.705 | -2.008 | 53618  | FUT8       | NM_001252615_12_+_1 |
| Fut8          | 4.132  | 3.990  | 4.638  | 4.343  | 4.417  | 4.141  | 4.285  | 3.722  | 2.979  | 3.601  | 53618  | FUT8       | NM_001252616_12_+_1 |
| Csgalnact1    | -4.981 | -4.981 | -4.878 | -2.269 | -4.954 | -4.979 | -4.894 | -4.960 | -4.951 | -4.981 | 234356 | CSGALNACT1 | NM_001252623_8_-_1  |
| Ptgr2         | 1.265  | 0.335  | -0.268 | 0.291  | -0.379 | -0.209 | 0.938  | 0.421  | 1.451  | 1.473  | 77219  | PTGR2      | NM_001252625_12_+_1 |
| Ptgr2         | 2.226  | 2.660  | 1.786  | 1.165  | 1.449  | 1.415  | 1.392  | 2.020  | 1.873  | 1.496  | 77219  | PTGR2      | NM_001252626_12_+_1 |
| Smn1          | -1.885 | -4.572 | -3.722 | -1.304 | -0.532 | -1.870 | -3.502 | -2.473 | -4.759 | -0.858 | 20595  | SMN1 SMN2  | NM_001252629_13_+_1 |
| Cdh23         | -2.336 | -2.257 | -2.340 | -1.321 | -0.635 | -2.034 | -0.849 | -1.947 | -0.661 | -1.549 | 22295  | CDH23      | NM_001252635_10_-_1 |
| Rhobtb1       | -3.969 | -3.971 | -4.363 | -4.669 | -2.686 | -2.866 | -1.732 | -4.428 | -4.981 | -4.475 | 69288  | RHOBTB1    | NM_001252636_10_+_1 |
| Rhobtb1       | 2.864  | 3.670  | 3.868  | 3.976  | -3.089 | -1.559 | -2.604 | 0.144  | -4.981 | -2.322 | 69288  | RHOBTB1    | NM_001252637_10_+_1 |
| Rhobtb1       | -4.905 | -2.314 | -2.794 | -4.973 | -4.908 | -4.982 | -4.594 | -4.888 | -4.981 | -4.876 | 69288  | RHOBTB1    | NM_001252638_10_+_1 |
| Tbc1d7        | 3.957  | 3.778  | 3.027  | 3.442  | 3.039  | 3.318  | 2.242  | 2.350  | 1.749  | 2.108  | 67046  | TBC1D7     | NM_001252639_13_-_1 |
| Tbc1d7        | -1.724 | -0.221 | -4.957 | -2.509 | -3.284 | -3.551 | -2.374 | -2.340 | -3.327 | -1.394 | 67046  | TBC1D7     | NM_001252640_13_-_1 |
| Hrh1          | 0.494  | 0.172  | 1.349  | 0.613  | 1.784  | 2.455  | 1.180  | 0.805  | -1.793 | -4.391 | 15465  | HRH1       | NM_001252642_6_+_1  |
| Hrh1          | -2.970 | -2.495 | -3.337 | -3.820 | -2.919 | -1.691 | -2.787 | -1.694 | -3.719 | -4.676 | 15465  | HRH1       | NM_001252643_6_+_1  |
| 4833439L19Rik | 2.611  | 2.214  | 1.159  | 1.698  | 2.192  | 1.200  | 0.924  | 2.029  | 1.218  | 2.493  | 97820  | KIAA1191   | NM_001252645_13_-_1 |
| 4833439L19Rik | 4.150  | 4.541  | 4.174  | 4.318  | 4.245  | 4.385  | 4.123  | 4.454  | 5.347  | 5.479  | 97820  | KIAA1191   | NM_001252646_13_-_1 |
| 4833439L19Rik | 1.941  | 1.108  | 1.487  | -0.574 | 1.047  | 0.782  | 0.626  | 0.711  | 2.283  | 1.901  | 97820  | KIAA1191   | NM_001252647_13_-_1 |
| 4833439L19Rik | 0.026  | 2.858  | 2.166  | 1.123  | 2.085  | 1.254  | 1.699  | 2.125  | 2.984  | 3.306  | 97820  | KIAA1191   | NM_001252648_13_-_1 |
| Csf3r         | -1.792 | -3.214 | -1.557 | -0.523 | -0.676 | -1.583 | 1.489  | 1.527  | 1.174  | 2.961  | 12986  | CSF3R      | NM_001252651_4_+_1  |
| Ecm1          | -0.155 | -0.711 | 0.375  | -0.279 | -1.650 | -1.328 | -0.257 | 1.303  | 3.516  | 2.977  | 13601  | ECM1       | NM_001252653_3_-_1  |
| Kcnab2        | -2.549 | -0.223 | -0.176 | -0.423 | 1.019  | 0.921  | -0.037 | 1.061  | 2.468  | 1.366  | 16498  | KCNAB2     | NM_001252654_4_-_1  |
| Kcnab2        | 3.210  | 2.909  | 2.527  | 2.715  | 2.998  | 2.518  | 3.598  | 4.032  | 6.280  | 6.207  | 16498  | KCNAB2     | NM_001252655_4_-_1  |
| Kcnab2        | 1.592  | 1.397  | 0.223  | 0.094  | -0.290 | -0.762 | 0.807  | 0.995  | 3.227  | 3.350  | 16498  | KCNAB2     | NM_001252656_4_-_1  |
| Ldlr          | 4.235  | 4.169  | 1.290  | -0.771 | -0.140 | 0.717  | 1.480  | 0.897  | 0.085  | 0.408  | 16835  | LDLR       | NM_001252658_9_+_1  |
| Ldlr          | 3.248  | 0.485  | -0.875 | -1.417 | 0.156  | -0.153 | 0.803  | 0.530  | 3.011  | 3.137  | 16835  | LDLR       | NM_001252659_9_+_1  |
| Dmtn          | -4.671 | -4.409 | -4.807 | -4.742 | -4.744 | -3.576 | -4.738 | -4.896 | -4.981 | -4.915 | 13829  | DMTN       | NM_001252662_14_-_1 |
| Dmtn          | -4.569 | -4.031 | -4.856 | -4.299 | -4.864 | -4.708 | -4.601 | -4.892 | -4.981 | -4.813 | 13829  | DMTN       | NM_001252663_14_-_1 |
| Dmtn          | -4.304 | -3.849 | -4.759 | -4.681 | -4.687 | -3.493 | -4.498 | -2.796 | -4.981 | -4.753 | 13829  | DMTN       | NM_001252664_14_-_1 |
| Dmtn          | -1.260 | -0.366 | -1.983 | 0.397  | -2.387 | 0.829  | -3.198 | 0.111  | -4.981 | -1.563 | 13829  | DMTN       | NM_001252665_14_-_1 |
| Dmtn          | -3.065 | -1.935 | -4.003 | -2.134 | -3.898 | -2.100 | -2.016 | -2.241 | -4.981 | -3.464 | 13829  | DMTN       | NM_001252666_14_-_1 |
| Dhx30         | 2.689  | 2.494  | 3.634  | 3.587  | 3.991  | 3.983  | 3.424  | 3.899  | 4.087  | 4.192  | 72831  | DHX30      | NM_001252682_9_-_1  |
| Dhx30         | 2.711  | 3.036  | 1.675  | 2.690  | 2.413  | 2.561  | 2.316  | 3.207  | 2.527  | 2.853  | 72831  | DHX30      | NM_001252683_9_-_1  |
| Smc5          | 2.984  | 4.215  | 3.879  | 4.768  | 4.212  | 5.011  | 4.314  | 4.770  | 3.892  | 4.702  | 226026 | SMC5       | NM_001252684_19_-_1 |
| Smc5          | -1.141 | -2.990 | -0.394 | -1.769 | -1.159 | -3.393 | -0.551 | -1.632 | -1.534 | 3.506  | 226026 | SMC5       | NM_001252685_19_-_1 |
| Fam214b       | -0.149 | -4.063 | 0.332  | -1.697 | -1.441 | -0.308 | 0.143  | -0.157 | 2.212  | 2.340  | 230088 | FAM214B    | NM_001253353_4_-_1  |
| Fam214b       | 2.026  | 2.122  | 2.624  | 2.728  | 1.815  | 2.504  | 2.676  | 3.095  | 4.967  | 4.600  | 230088 | FAM214B    | NM_001253354_4_-_1  |
| B4galt2       | -3.823 | -4.981 | -4.652 | -4.974 | -4.802 | -4.963 | -4.915 | -4.839 | -4.696 | -4.981 | 53418  | B4GALT2    | NM_001253381_4_-_1  |
| Zfp82         | -0.864 | -4.981 | -2.189 | -4.986 | -1.051 | -4.970 | -2.388 | -4.854 | -3.569 | -4.981 | 330502 | ZFP82      | NM_001253385_7_-_1  |
| Serinc2       | -4.981 | -4.981 | -3.974 | -3.256 | -4.916 | -4.547 | -3.593 | -2.856 | -4.981 | -4.981 | 230779 | SERINC2    | NM_001253386_4_-_1  |
| Mtfr1         | 1.164  | 1.458  | 1.682  | 0.531  | -0.222 | 0.048  | 0.909  | 1.636  | 1.616  | 1.716  | 67472  | MTFR1      | NM_001253390_3_+_1  |
| Mtfr1         | -4.183 | -3.781 | -4.433 | -4.782 | -4.731 | -2.665 | -4.256 | -3.077 | -4.295 | -4.626 | 67472  | MTFR1      | NM_001253391_3_+_1  |
| Smarcad1      | -4.981 | -4.558 | -1.891 | -4.958 | -4.870 | -4.870 | -4.941 | -4.948 | -3.889 | -4.602 | 13990  | SMARCAD1   | NM_001253392_6_+_1  |
| Slc7a7        | 0.705  | -0.460 | 0.238  | 0.860  | 1.644  | 1.725  | 2.927  | 2.483  | -4.019 | -0.015 | 20540  | SLC7A7     | NM_001253679_14_-_1 |
| Slc7a7        | 3.233  | 0.570  | 4.203  | 4.085  | 4.810  | 5.147  | 4.212  | 5.734  | 5.419  | 7.133  | 20540  | SLC7A7     | NM_001253680_14_-_1 |
| Immt          | 3.062  | 3.027  | 3.571  | 2.863  | 1.870  | 0.922  | 2.572  | 1.522  | 3.316  | 0.298  | 76614  | IMMT       | NM_001253681_6_+_1  |
| Dnajc12       | -0.438 | -1.722 | -0.940 | -2.101 | -2.072 | -4.458 | -2.979 | -1.080 | -1.527 | -4.772 | 30045  | DNAJC12    | NM_001253685_10_+_1 |
| Immt          | 2.065  | -0.873 | 0.301  | 0.224  | 1.592  | 1.422  | 0.631  | 2.382  | 0.244  | 2.506  | 76614  | IMMT       | NM_001253686_6_+_1  |
| Immt          | 5.048  | 5.374  | 4.916  | 5.173  | 4.517  | 4.595  | 4.835  | 5.060  | 5.361  | 5.384  | 76614  | IMMT       | NM_001253687_6_+_1  |
| Immt          | 3.213  | 3.134  | 2.915  | 2.866  | 3.339  | 3.130  | 2.706  | 3.159  | 3.542  | 3.342  | 76614  | IMMT       | NM_001253688_6_+_1  |
| Immt          | -4.357 | -4.228 | -2.403 | -1.167 | -1.682 | -1.391 | -0.174 | -2.109 | -0.568 | -1.558 | 76614  | IMMT       | NM_001253689_6_+_1  |

|               |        |        |        |        |        |        |        |        |        |        |        |          |                     |
|---------------|--------|--------|--------|--------|--------|--------|--------|--------|--------|--------|--------|----------|---------------------|
| Patz1         | 0.515  | -0.324 | 2.524  | 1.967  | 1.493  | 0.969  | 0.482  | 0.651  | 2.189  | 2.379  | 56218  | PATZ1    | NM_001253690_11_+_1 |
| Patz1         | 2.401  | 2.539  | 1.839  | 1.916  | 3.150  | 1.505  | 1.910  | 0.405  | 1.635  | 0.623  | 56218  | PATZ1    | NM_001253691_11_+_1 |
| Elmod3        | 3.186  | 3.014  | 1.977  | 2.283  | 1.751  | 2.360  | 2.480  | 2.548  | 3.039  | 3.256  | 232089 | ELMOD3   | NM_001253692_6_-_1  |
| Zfp219        | -4.260 | -0.397 | -1.131 | -2.639 | -3.696 | -2.586 | -2.187 | -1.310 | -1.110 | -1.982 | 69890  | ZNF219   | NM_001253694_14_-_1 |
| Zfp219        | 1.579  | 2.365  | 1.930  | 1.778  | 2.243  | 2.499  | 2.565  | 1.687  | 2.997  | 3.023  | 69890  | ZNF219   | NM_001253695_14_-_1 |
| Zfp219        | 1.851  | -0.358 | 0.909  | 1.481  | -0.786 | 0.201  | 1.127  | -0.678 | -3.834 | -1.243 | 69890  | ZNF219   | NM_001253696_14_-_1 |
| Elp5          | 2.302  | 3.010  | 1.594  | 0.821  | 0.820  | -0.594 | 0.962  | 0.534  | 1.579  | 1.641  | 54351  | ELP5     | NM_001253700_11_-_1 |
| St7l          | -4.843 | 0.701  | -0.955 | -3.221 | -0.292 | -0.687 | -1.118 | -2.279 | -0.809 | -0.070 | 229681 | ST7L     | NM_001253702_3_+_1  |
| St7l          | -0.310 | 0.054  | 0.139  | -2.249 | -4.877 | -2.209 | -0.856 | -1.254 | 0.390  | 0.100  | 229681 | ST7L     | NM_001253703_3_+_1  |
| Pym1          | -1.030 | -0.443 | -2.158 | 0.477  | 0.020  | -2.610 | -1.129 | -1.395 | 0.200  | -1.480 | 78428  | PYM1     | NM_001253704_10_+_1 |
| Pym1          | -0.786 | -0.120 | 0.041  | 0.043  | -1.002 | -0.845 | -0.316 | -0.232 | 1.090  | 0.764  | 78428  | PYM1     | NM_001253705_10_+_1 |
| Sept6         | 6.236  | 6.104  | 7.674  | 7.768  | 6.642  | 6.365  | 6.235  | 6.211  | 4.797  | 4.600  | 56526  | SEPT6    | NM_001253706_X_-_1  |
| Mbnl1         | 6.610  | 6.588  | 6.214  | 5.923  | 5.750  | 5.772  | 5.920  | 5.930  | 4.089  | 5.425  | 56758  | MBNL1    | NM_001253708_3_+_1  |
| Mbnl1         | 5.213  | 5.736  | 4.648  | 4.564  | 3.843  | 4.034  | 4.183  | 3.553  | 5.494  | 5.734  | 56758  | MBNL1    | NM_001253709_3_+_1  |
| Mbnl1         | -2.418 | 0.120  | -2.657 | -3.136 | -4.352 | -2.390 | -2.339 | -3.041 | -1.687 | 0.867  | 56758  | MBNL1    | NM_001253710_3_+_1  |
| Mbnl1         | 2.744  | 3.533  | 4.171  | 4.326  | 2.898  | 3.670  | 3.037  | 4.059  | 3.898  | 5.297  | 56758  | MBNL1    | NM_001253711_3_+_1  |
| Msra          | 4.407  | 3.993  | 4.352  | 4.573  | 4.289  | 3.983  | 4.924  | 4.762  | 5.065  | 5.335  | 110265 | MSRA     | NM_001253712_14_-_1 |
| Mbnl1         | 8.467  | 8.895  | 8.596  | 8.271  | 7.860  | 8.045  | 7.611  | 7.976  | 8.746  | 8.968  | 56758  | MBNL1    | NM_001253713_3_+_1  |
| Msra          | -2.058 | -4.774 | -3.429 | -0.922 | -4.970 | -3.696 | -1.248 | -3.386 | -2.708 | -1.888 | 110265 | MSRA     | NM_001253714_14_-_1 |
| Msra          | -0.483 | -1.175 | -1.858 | -2.324 | -1.404 | -2.355 | -1.195 | -1.269 | 0.178  | -1.443 | 110265 | MSRA     | NM_001253715_14_-_1 |
| Msra          | 2.118  | 3.044  | 1.753  | 2.529  | 0.667  | -0.115 | 1.857  | 2.807  | 2.761  | 2.400  | 110265 | MSRA     | NM_001253716_14_-_1 |
| Atg7          | -3.418 | -2.988 | -2.377 | -2.737 | -1.746 | -4.811 | -3.915 | -4.584 | -3.256 | -0.148 | 74244  | ATG7     | NM_001253717_6_+_1  |
| Atg7          | 0.027  | -2.606 | 1.193  | 0.409  | 2.189  | 2.074  | 1.741  | 1.885  | 3.550  | 3.350  | 74244  | ATG7     | NM_001253718_6_+_1  |
| Ints9         | 0.593  | -0.696 | -1.981 | 0.367  | -0.437 | -0.838 | -1.844 | -1.033 | -0.492 | 0.573  | 210925 | INTS9    | NM_001253731_14_+_1 |
| Pdlim2        | 3.818  | 4.796  | 5.310  | 5.712  | 4.241  | 4.702  | 3.679  | 4.342  | 4.322  | 4.097  | 213019 | PDILIM2  | NM_001253736_14_-_1 |
| Fcer2a        | 0.161  | 0.191  | -2.822 | -1.748 | -0.987 | -2.667 | -1.627 | 0.522  | -2.227 | -2.682 | 14128  | FCER2    | NM_001253737_8_-_1  |
| Tpm3          | 8.685  | 8.035  | 9.524  | 9.254  | 9.625  | 9.218  | 9.194  | 8.852  | 9.379  | 8.905  | 59069  | TPM3     | NM_001253738_3_+_1  |
| Fcer2a        | -4.210 | -0.933 | -4.426 | -2.699 | -4.609 | -4.905 | -2.683 | -2.983 | -3.361 | -3.578 | 14128  | FCER2    | NM_001253739_8_-_1  |
| Tpm3          | 2.992  | 2.529  | 3.853  | 2.515  | 3.998  | 2.705  | 3.329  | 2.593  | 3.494  | 2.715  | 59069  | TPM3     | NM_001253740_3_+_1  |
| Fcer2a        | -3.862 | -3.192 | -4.486 | -4.888 | -3.195 | -4.950 | -3.991 | -4.816 | -1.212 | -4.950 | 14128  | FCER2    | NM_001253743_8_-_1  |
| Fcer2a        | -4.819 | -2.263 | -3.308 | -3.951 | -3.310 | -1.523 | -3.223 | -2.799 | -1.818 | -4.955 | 14128  | FCER2    | NM_001253745_8_-_1  |
| Fcer2a        | -4.760 | -2.459 | -3.418 | -3.860 | -4.052 | -2.956 | -3.229 | -4.889 | -1.818 | -4.954 | 14128  | FCER2    | NM_001253746_8_-_1  |
| Fcer2a        | -0.776 | -2.510 | -3.755 | -4.902 | -3.575 | -2.998 | -4.210 | -1.413 | -2.781 | -1.509 | 14128  | FCER2    | NM_001253747_8_-_1  |
| Fdps          | 6.058  | 6.123  | 3.473  | 3.181  | 1.020  | 1.821  | 2.467  | 3.018  | 2.505  | 2.829  | 110196 | FDPS     | NM_001253751_3_-_1  |
| Zmym5         | 3.173  | 3.682  | 3.394  | 2.159  | 2.829  | 2.843  | 3.310  | 2.525  | 3.374  | 3.477  | 219105 | ZMYM5    | NM_001253752_14_-_1 |
| Zmym5         | 3.589  | 2.546  | 3.966  | 4.201  | 3.900  | 3.791  | 3.350  | 3.883  | 3.074  | 4.059  | 219105 | ZMYM5    | NM_001253753_14_-_1 |
| Tdrd3         | 1.200  | 1.517  | 1.938  | 1.424  | 1.723  | 1.269  | 1.557  | 1.043  | 1.589  | 1.856  | 219249 | TDRD3    | NM_001253755_14_+_1 |
| Anp32e        | 4.063  | 3.422  | 3.418  | 3.291  | 3.471  | 3.230  | 3.213  | 3.071  | 2.126  | 2.011  | 66471  | NA       | NM_001253757_3_+_1  |
| Anp32e        | -4.981 | -4.981 | -0.728 | -0.771 | -0.700 | -2.317 | -1.317 | -2.669 | -2.230 | -4.962 | 66471  | NA       | NM_001253758_3_+_1  |
| Enox1         | -3.825 | -0.044 | -4.534 | -4.926 | -4.957 | -4.944 | -4.973 | -4.381 | -4.981 | -4.580 | 239188 | ENOX1    | NM_001253759_14_+_1 |
| Dgkh          | -4.981 | -4.981 | -4.601 | -2.931 | -3.398 | -3.463 | -2.134 | -1.244 | -1.642 | -0.547 | 380921 | DGKH     | NM_001253766_14_-_1 |
| Ssx2ip        | -2.025 | -4.248 | -0.265 | -4.737 | -3.188 | -4.746 | -3.780 | -4.870 | -4.558 | -4.864 | 99167  | SSX2IP   | NM_001253768_3_+_1  |
| Ssx2ip        | 1.507  | 1.720  | 1.506  | 2.112  | -0.713 | 1.054  | -1.731 | 0.708  | 0.613  | 2.136  | 99167  | SSX2IP   | NM_001253769_3_+_1  |
| Ssx2ip        | -1.972 | 1.094  | -1.737 | -2.072 | -1.891 | -0.565 | 0.497  | -1.926 | -0.512 | -1.091 | 99167  | SSX2IP   | NM_001253770_3_+_1  |
| Prlr          | -2.286 | -4.981 | -4.867 | -4.975 | -4.965 | -4.961 | -4.966 | -2.331 | -4.981 | -4.981 | 19116  | PRLR     | NM_001253782_15_+_1 |
| Def8          | -0.888 | 0.110  | -2.130 | -2.301 | -1.390 | 0.300  | -3.503 | -3.223 | -0.831 | -1.030 | 23854  | DEF8     | NM_001253783_8_+_1  |
| Def8          | 1.513  | 0.389  | 0.847  | 1.637  | -2.480 | 0.140  | -1.525 | -1.672 | 2.408  | 2.023  | 23854  | DEF8     | NM_001253784_8_+_1  |
| 1110017D15Rik | -4.981 | -4.981 | -4.980 | -4.555 | -4.760 | -4.639 | -4.981 | -4.981 | -3.750 | -4.981 | 73721  | C9orf24  | NM_001253788_4_-_1  |
| Tarbp2        | 1.797  | 1.934  | 0.620  | -0.140 | 0.278  | -0.610 | 0.798  | 0.703  | -0.033 | 0.612  | 21357  | TARBP2   | NM_001253795_15_+_1 |
| Slc12a4       | -0.723 | 0.748  | -1.654 | -0.562 | -0.863 | -0.567 | -1.880 | -0.754 | -2.816 | -3.614 | 20498  | SLC12A4  | NM_001253804_8_-_1  |
| Ywhaz         | 2.839  | 2.516  | 2.729  | 2.592  | 1.798  | 2.027  | 1.575  | 2.079  | 2.952  | 2.625  | 22631  | YWHAZ    | NM_001253805_15_-_1 |
| Ywhaz         | 8.339  | 8.428  | 8.955  | 9.093  | 8.368  | 8.415  | 8.693  | 9.086  | 9.541  | 9.707  | 22631  | YWHAZ    | NM_001253806_15_-_1 |
| Ywhaz         | 7.196  | 7.792  | 8.068  | 8.079  | 7.558  | 7.373  | 7.787  | 8.045  | 8.051  | 8.713  | 22631  | YWHAZ    | NM_001253807_15_-_1 |
| Racgap1       | 4.190  | 3.405  | 4.244  | 4.176  | 4.500  | 3.725  | 4.417  | 4.220  | 6.038  | 5.758  | 26934  | RACGAP1  | NM_001253808_15_-_1 |
| Racgap1       | 2.454  | 2.252  | 0.671  | 1.417  | 1.582  | 0.808  | 1.737  | 0.680  | 2.415  | 2.590  | 26934  | RACGAP1  | NM_001253809_15_-_1 |
| Elp3          | 4.493  | 4.328  | 4.042  | 4.314  | 2.874  | 3.676  | 2.748  | 3.882  | 3.636  | 4.091  | 74195  | ELP3     | NM_001253812_14_-_1 |
| Ano6          | -2.052 | 2.189  | 2.401  | 3.043  | 2.316  | 2.501  | 2.783  | 2.452  | 3.933  | 4.461  | 105722 | ANO6     | NM_001253813_15_+_1 |
| Ankle2        | 5.606  | 5.657  | 5.876  | 5.511  | 5.712  | 5.547  | 5.832  | 5.771  | 7.020  | 6.770  | 71782  | ANKLE2   | NM_001253814_5_+_1  |
| Tmem184b      | 1.067  | 0.615  | 1.897  | 0.799  | 2.211  | 1.220  | 2.776  | 1.685  | 2.951  | 2.420  | 223693 | TMEM184B | NM_001253817_15_-_1 |
| Tmem184b      | -3.678 | -2.935 | -1.404 | -4.524 | -2.109 | -1.101 | -2.698 | -4.191 | 0.023  | -0.550 | 223693 | TMEM184B | NM_001253819_15_-_1 |
| Tmem184b      | 2.266  | -0.671 | 0.897  | 0.700  | 1.641  | 1.277  | 2.080  | 0.605  | 1.550  | 0.855  | 223693 | TMEM184B | NM_001253820_15_-_1 |
| Atp2c1        | 2.935  | -2.720 | -0.565 | 0.887  | -0.768 | -1.098 | 1.385  | 0.093  | 2.452  | 2.452  | 235574 | ATP2C1   | NM_001253831_9_-_1  |
| Fibp          | 4.547  | 4.862  | 4.291  | 4.448  | 4.019  | 4.047  | 3.925  | 3.886  | 3.471  | 3.448  | 58249  | FIBP     | NM_001253832_19_+_1 |
| Atp2c1        | 1.331  | 2.428  | 2.207  | 4.076  | 0.332  | 1.968  | 2.572  | 3.653  | 2.755  | 5.395  | 235574 | ATP2C1   | NM_001253834_9_-_1  |
| Atp2c1        | -0.075 | 0.085  | 1.520  | 1.698  | 0.280  | -0.446 | 0.642  | 0.951  | 3.930  | 3.332  | 235574 | ATP2C1   | NM_001253836_9_-_1  |
| Prpf19        | 1.957  | 1.026  | 2.501  | 2.368  | 1.864  | 1.602  | 2.272  | 2.327  | 2.043  | 1.795  | 28000  | PRPF19   | NM_001253843_19_+_1 |
| Prpf19        | -4.820 | -4.708 | -4.794 | -4.933 | -4.966 | -4.976 | -4.852 | -4.936 | -4.806 | -4.952 | 28000  | PRPF19   | NM_001253844_19_+_1 |
| Cbll1         | 4.088  | 3.753  | 4.140  | 3.956  | 4.108  | 3.955  | 4.378  | 4.267  | 4.415  | 4.440  | 104836 | CBLL1    | NM_001253847_12_-_1 |
| Cbll1         | 0.552  | 0.056  | -0.187 | -0.068 | -0.577 | -0.664 | 0.247  | -0.842 | -0.794 | 0.439  | 104836 | CBLL1    | NM_001253848_12_-_1 |
| Tmem52        | -4.981 | -1.314 | -4.176 | -2.657 | -4.937 | -2.357 | -3.110 | -2.610 | -4.981 | -4.981 | 69671  | TMEM52   | NM_001253856_4_+_1  |
| Tet1          | 2.065  | 1.812  | 0.518  | 0.314  | 2.070  | 0.155  | 0.370  | 0.472  | -2.950 | -2.440 | 52463  | TET1     | NM_001253857_10_-_1 |
| Tmem52        | -4.981 | -4.981 | -2.843 | -3.965 | -4.201 | -3.478 | -4.879 | -3.039 | -4.981 | -4.981 | 69671  | TMEM52   | NM_001253858_4_+_1  |
| Tcf12         | 4.061  | 4.673  | 2.643  | 1.779  | 1.074  | 0.863  | 0.871  | 2.477  | 3.353  | 3.037  | 21406  | TCF12    | NM_001253862_9_-_1  |
| Tcf12         | -3.324 | -3.580 | -4.309 | -4.593 | -4.123 | -1.968 | -3.980 | -4.396 | -4.434 | -4.343 | 21406  | TCF12    | NM_001253863_9_-_1  |

|                |        |        |        |        |        |        |        |        |        |        |                 |          |                     |
|----------------|--------|--------|--------|--------|--------|--------|--------|--------|--------|--------|-----------------|----------|---------------------|
| Tcf12          | 4.442  | 3.574  | 1.069  | 1.240  | 1.103  | 2.297  | 2.421  | 2.343  | 2.056  | 2.800  | 21406           | TCF12    | NM_001253864_9_-_1  |
| Tcf12          | 1.680  | 2.062  | -1.443 | 0.855  | -1.244 | -3.004 | -2.683 | -0.603 | 0.405  | 1.390  | 21406           | TCF12    | NM_001253865_9_-_1  |
| Tmem205        | 2.144  | 1.591  | -0.564 | -1.759 | -0.159 | -0.481 | 1.145  | -0.122 | 1.508  | -0.455 | 235043          | TMEM205  | NM_001253867_9_-_1  |
| Tmem205        | 2.955  | 3.050  | 1.498  | 1.767  | -0.276 | 0.790  | 1.307  | 0.616  | 2.532  | 1.604  | 235043          | TMEM205  | NM_001253868_9_-_1  |
| Tmem205        | -2.565 | 2.414  | 1.908  | 1.976  | -0.506 | -0.951 | 1.402  | 0.335  | -0.242 | 0.432  | 235043          | TMEM205  | NM_001253869_9_-_1  |
| Tmem205        | -0.192 | -4.003 | -4.607 | -4.879 | -4.824 | -4.878 | -4.584 | -4.713 | -2.507 | -4.930 | 235043          | TMEM205  | NM_001253870_9_-_1  |
| Itgal          | 5.826  | 5.214  | 5.333  | 5.087  | 5.055  | 4.562  | 6.481  | 6.440  | 7.670  | 7.697  | 16408           | ITGAL    | NM_001253872_7_+_1  |
| Itgal          | 5.960  | 5.909  | 5.979  | 5.817  | 4.660  | 4.815  | 6.761  | 7.044  | 8.420  | 8.459  | 16408           | ITGAL    | NM_001253873_7_+_1  |
| Itgal          | 3.344  | 1.557  | 2.877  | 2.029  | 2.378  | 1.751  | 3.661  | 3.409  | 4.624  | 4.806  | 16408           | ITGAL    | NM_001253874_7_+_1  |
| Mtf2           | 4.211  | 4.089  | 3.612  | 3.502  | 4.272  | 4.046  | 4.004  | 3.276  | 3.147  | 2.725  | 17765           | MTF2     | NM_001253877_5_+_1  |
| Mtf2           | -0.151 | -0.938 | -0.283 | -1.056 | -1.204 | -1.489 | -3.147 | -1.337 | -2.195 | -0.898 | 17765           | MTF2     | NM_001253878_5_+_1  |
| Mtf2           | -0.524 | 0.248  | -2.412 | -0.110 | 0.938  | 0.579  | -0.829 | -0.204 | -4.122 | -0.192 | 17765           | MTF2     | NM_001253879_5_+_1  |
| Mtf2           | -2.299 | -4.867 | -4.739 | -4.330 | -2.423 | -4.760 | -2.329 | -4.877 | -1.671 | -4.911 | 17765           | MTF2     | NM_001253880_5_+_1  |
| Pkm            | 4.728  | 4.734  | 3.099  | 3.157  | 4.829  | 4.517  | 4.794  | 4.963  | 5.951  | 5.598  | 18746           | PKM      | NM_001253883_9_+_1  |
| Apbb1          | -4.981 | -4.981 | -4.723 | -4.971 | -3.527 | -4.968 | -4.579 | -4.932 | -4.553 | -4.423 | 11785           | APBB1    | NM_001253885_7_-_1  |
| Apbb1          | -4.981 | -4.981 | -3.432 | -4.919 | -2.092 | -4.966 | -2.619 | -1.590 | 0.170  | 1.472  | 11785           | APBB1    | NM_001253886_7_-_1  |
| Apbb1          | -1.596 | -2.997 | -4.075 | -3.828 | -2.043 | -4.441 | -2.765 | -4.798 | -0.997 | -4.704 | 11785           | APBB1    | NM_001253887_7_-_1  |
| Tssk4          | -4.431 | -1.620 | -3.126 | -1.940 | -3.278 | -4.743 | -2.946 | -3.076 | -2.320 | -3.318 | 71099           | TSSK4    | NM_001253888_14_+_1 |
| Tssk4          | -3.629 | -4.780 | -1.754 | -1.925 | -3.517 | -2.961 | -2.759 | -1.790 | -3.323 | -3.470 | 71099           | TSSK4    | NM_001253889_14_+_1 |
| Prkar1b        | 0.487  | -2.324 | -1.492 | -0.742 | -0.444 | -0.941 | -0.713 | 1.027  | -0.877 | 0.026  | 19085           | PRKAR1B  | NM_001253890_5_-_1  |
| Slc4a2         | 2.294  | 2.412  | 2.257  | 2.815  | 2.156  | 2.125  | 2.592  | 2.941  | 3.481  | 3.321  | 20535           | SLC4A2   | NM_001253892_5_+_1  |
| Dnm2           | 5.344  | 5.428  | 5.871  | 5.936  | 6.213  | 5.864  | 6.445  | 6.113  | 7.136  | 6.824  | 13430           | DNM2     | NM_001253893_9_+_1  |
| Dnm2           | 2.879  | 3.212  | 3.345  | 3.612  | 3.606  | 3.665  | 3.307  | 3.686  | 5.000  | 5.310  | 13430           | DNM2     | NM_001253894_9_+_1  |
| Ecsit          | 4.121  | 2.544  | 3.205  | 2.869  | 3.496  | 1.917  | 2.880  | 1.832  | 2.607  | 2.091  | 26940           | ECSIT    | NM_001253897_9_-_1  |
| Ecsit          | 0.912  | 4.832  | -4.425 | 3.610  | -0.532 | 3.533  | 0.210  | 3.858  | -1.063 | 3.326  | 26940           | ECSIT    | NM_001253898_9_-_1  |
| Ncor2          | -1.529 | -0.819 | 1.412  | 1.562  | 0.156  | 0.719  | 1.551  | 1.766  | 4.457  | 4.265  | 20602           | NCOR2    | NM_001253904_5_-_1  |
| Ncor2          | 0.425  | 1.427  | 1.946  | 1.697  | 2.172  | 1.556  | 2.745  | 2.092  | 3.379  | 3.155  | 20602           | NCOR2    | NM_001253905_5_-_1  |
| Sez6l          | -4.416 | -4.981 | -4.569 | -4.849 | -4.420 | -4.687 | -4.753 | -4.833 | -4.981 | -4.981 | 56747           | SEZ6L    | NM_001253916_5_-_1  |
| Sez6l          | -1.790 | -4.981 | -2.235 | -3.591 | 1.889  | 3.801  | -2.727 | -2.034 | -4.981 | -4.981 | 56747           | SEZ6L    | NM_001253917_5_-_1  |
| Akt1s1         | 1.075  | -0.840 | 1.067  | 0.617  | 1.613  | 0.515  | 1.566  | 0.522  | 2.002  | 1.698  | 67605           | AKT1S1   | NM_001253920_7_+_1  |
| Record_removed | -4.981 | -3.408 | 0.864  | 0.580  | -2.025 | 0.365  | 1.544  | 1.963  | 3.070  | 3.259  | Record_removeNA |          | NM_001254730_4_+_1  |
| BC017643       | 3.493  | 3.224  | 3.015  | 3.003  | 2.740  | 1.969  | 2.431  | 2.388  | 3.842  | 4.517  | 217370          | C17orf62 | NM_001254735_11_-_1 |
| E030030I06Rik  | -1.764 | -0.887 | -1.028 | -2.599 | -1.068 | -3.693 | -1.928 | -2.715 | -0.787 | -0.797 | 319887          | NA       | NM_001254744_10_-_1 |
| E030030I06Rik  | -0.735 | -1.178 | 0.812  | -1.556 | 1.347  | -1.830 | 1.291  | -1.577 | 1.131  | -0.089 | 319887          | NA       | NM_001254745_10_-_1 |
| IL15           | 0.355  | -0.710 | 4.366  | 3.441  | 2.443  | 1.286  | 3.040  | 1.225  | 3.423  | 2.162  | 16168           | IL15     | NM_001254747_8_-_1  |
| Echdc2         | -4.981 | -4.981 | -3.365 | -2.066 | -4.686 | -2.168 | -4.982 | -2.783 | -4.981 | -4.981 | 52430           | ECHDC2   | NM_001254754_4_+_1  |
| Rnf128         | -4.981 | -2.660 | -3.830 | -4.577 | -4.947 | -4.662 | -4.954 | -4.209 | -4.981 | -4.966 | 66889           | RNF128   | NM_001254761_X_+_1  |
| Mospd3         | 5.326  | 5.172  | 5.494  | 5.332  | 4.731  | 4.516  | 4.999  | 5.109  | 5.678  | 5.332  | 68929           | MOSPD3   | NM_001254762_5_-_1  |
| BC035044       | 7.550  | 7.694  | 8.678  | 8.740  | 7.844  | 7.740  | 7.457  | 7.242  | 6.329  | 6.006  | 232406          | NA       | NM_001254946_6_-_1  |
| Zfp850         | 0.848  | 1.045  | 2.108  | 1.287  | 2.106  | 2.253  | 2.312  | 1.991  | 1.953  | 2.528  | 100043772       | NA       | NM_001254951_7_-_1  |
| Ankrd66        | -4.981 | -4.981 | -4.104 | -4.986 | -3.877 | -3.519 | -2.579 | -0.917 | 0.462  | 1.458  | 100043332       | ANKRD66  | NM_001254953_17_-_1 |
| Btbd8          | -0.405 | -0.267 | -1.596 | -1.994 | -0.193 | -1.010 | -0.655 | -1.804 | -1.809 | -2.923 | 100503185       | BTBD8    | NM_001255991_5_+_1  |
| Bbs12          | -0.648 | 1.486  | 0.296  | 1.030  | 0.688  | 1.235  | -0.284 | 0.554  | -2.048 | 0.735  | 241950          | BBS12    | NM_001255992_3_+_1  |
| Ubox5          | 2.050  | 2.602  | 2.919  | 2.778  | 2.122  | 2.663  | 1.904  | 2.643  | 2.091  | 1.941  | 140629          | UBOX5    | NM_001255993_2_-_1  |
| Ubox5          | 1.900  | -0.065 | 1.243  | 2.182  | 1.868  | 0.406  | 2.719  | 0.421  | 3.239  | 2.295  | 140629          | UBOX5    | NM_001255994_2_-_1  |
| Cacna1c        | -3.966 | -3.446 | -4.644 | -4.390 | -4.370 | -4.199 | -4.536 | -4.619 | -4.981 | -3.658 | 12288           | CACNA1C  | NM_001255997_6_-_1  |
| Cacna1c        | -4.142 | -3.686 | -4.759 | -3.985 | -4.699 | -4.893 | -4.672 | -4.785 | -4.981 | -4.163 | 12288           | CACNA1C  | NM_001255998_6_-_1  |
| Cacna1c        | -3.966 | -3.446 | -4.644 | -4.390 | -4.370 | -4.199 | -4.536 | -4.619 | -4.981 | -3.658 | 12288           | CACNA1C  | NM_001255999_6_-_1  |
| Cacna1c        | -4.981 | -4.981 | -4.976 | -4.575 | -4.536 | -4.478 | -4.980 | -4.979 | -4.981 | -4.981 | 12288           | CACNA1C  | NM_001256000_6_-_1  |
| Cacna1c        | -4.981 | -4.981 | -4.980 | -4.687 | -3.688 | -4.025 | -4.980 | -4.979 | -4.981 | -4.981 | 12288           | CACNA1C  | NM_001256001_6_-_1  |
| Cacna1c        | -4.981 | -4.981 | -4.983 | -4.904 | -4.783 | -4.911 | -4.980 | -4.980 | -4.981 | -4.981 | 12288           | CACNA1C  | NM_001256002_6_-_1  |
| Gbp4           | 2.112  | 2.363  | 1.521  | 1.574  | 2.639  | 2.281  | 3.026  | 1.792  | -0.599 | -4.404 | 17472           | GBP4     | NM_001256005_5_-_1  |
| Bmp8a          | -4.981 | -4.981 | -4.703 | -4.295 | -1.837 | -1.082 | -3.029 | -4.682 | -4.543 | -4.683 | 12163           | BMP8A    | NM_001256019_4_-_1  |
| Otud4          | 4.378  | 4.164  | 4.451  | 4.439  | 4.549  | 4.229  | 4.224  | 4.247  | 3.832  | 4.906  | 73945           | OTUD4    | NM_001256033_8_+_1  |
| Hsf4           | -4.981 | -4.981 | -4.962 | -4.981 | -4.063 | -4.290 | -4.892 | -4.967 | -4.941 | -4.908 | 26386           | HSF4     | NM_001256042_8_+_1  |
| Hsf4           | -4.981 | -4.981 | -4.740 | -4.874 | -4.796 | -4.756 | -4.443 | -3.842 | -4.162 | -4.981 | 26386           | HSF4     | NM_001256044_8_+_1  |
| Maml1d1        | -4.780 | -3.425 | -1.834 | 0.187  | -4.294 | -3.562 | -4.111 | -3.115 | -0.923 | -0.508 | 333639          | NA       | NM_001256048_X_+_1  |
| Rslcan18       | -3.563 | -0.055 | -1.012 | -1.160 | -1.005 | -2.045 | -3.071 | -1.892 | -0.909 | -0.156 | 432770          | NA       | NM_001256052_13_-_1 |
| Eif3j2         | 5.584  | 5.070  | 5.339  | 4.847  | 4.942  | 4.574  | 5.504  | 5.052  | 4.960  | 4.859  | 100042807       | EIF3J    | NM_001256055_2_+_1  |
| Ccdc149        | -4.981 | -4.981 | -2.679 | -2.491 | -4.992 | -4.992 | -3.134 | -4.934 | -3.242 | -4.981 | 100503884       | CCDC149  | NM_001256059_5_-_1  |
| Gm5141         | 3.681  | 3.254  | 2.839  | 2.520  | 3.225  | 3.012  | 3.317  | 2.803  | 1.448  | 2.077  | 380850          | NA       | NM_001256065_13_-_1 |
| Myo7a          | -3.702 | -3.617 | -4.279 | -4.651 | -2.892 | -4.901 | -2.799 | -3.388 | 0.784  | 0.655  | 17921           | MYO7A    | NM_001256081_7_-_1  |
| Myo7a          | 1.120  | 0.786  | -0.884 | -1.231 | -0.990 | -1.010 | 1.468  | 0.864  | 3.673  | 3.016  | 17921           | MYO7A    | NM_001256082_7_-_1  |
| Myo7a          | 1.782  | 1.424  | -0.245 | -0.499 | -0.272 | -0.153 | 2.184  | 1.697  | 4.367  | 3.684  | 17921           | MYO7A    | NM_001256083_7_-_1  |
| Rnf6           | 2.896  | 3.903  | 2.601  | 2.712  | 1.671  | 3.058  | 0.717  | 0.655  | 3.455  | 4.485  | 74132           | RNF6     | NM_001256085_5_-_1  |
| Rnf6           | 0.537  | -0.531 | -2.200 | 0.012  | -3.042 | -1.948 | -0.516 | -0.184 | -0.209 | 1.369  | 74132           | RNF6     | NM_001256086_5_-_1  |
| Rnf6           | 1.658  | 2.518  | 1.344  | 1.504  | 0.759  | 1.871  | 1.995  | 1.673  | 1.079  | 3.459  | 74132           | RNF6     | NM_001256087_5_-_1  |
| Dtx2           | 3.901  | 3.579  | 3.144  | 2.821  | 2.344  | 1.739  | 2.776  | 2.597  | 3.345  | 2.913  | 74198           | DTX2     | NM_001256096_5_+_1  |
| Dtx2           | -0.786 | 0.355  | -2.965 | -2.800 | -4.724 | -2.139 | -1.969 | -2.742 | -1.657 | -4.824 | 74198           | DTX2     | NM_001256097_5_+_1  |
| Dtx2           | 3.475  | 3.826  | 2.235  | 2.160  | 2.401  | 2.171  | 2.467  | 0.785  | 2.730  | 2.589  | 74198           | DTX2     | NM_001256098_5_+_1  |
| Mtif3          | 2.632  | 1.103  | 3.023  | 3.268  | 1.970  | 1.882  | 0.951  | 0.448  | 1.239  | 2.035  | 76366           | MTIF3    | NM_001256100_5_-_1  |
| Mtif3          | 3.241  | 3.691  | 3.805  | 3.750  | 2.060  | 2.818  | 2.572  | 2.513  | 1.952  | 2.194  | 76366           | MTIF3    | NM_001256101_5_-_1  |
| Mtif3          | 3.864  | 3.782  | 4.029  | 4.227  | 3.042  | 3.267  | 2.975  | 3.296  | 3.413  | 2.952  | 76366           | MTIF3    | NM_001256102_5_-_1  |
| Slc10a3        | 3.988  | 3.587  | 3.935  | 2.881  | 3.133  | 2.807  | 3.479  | 3.121  | 2.451  | 3.211  | 214601          | SLC10A3  | NM_001256104_X_-_1  |

|               |        |        |        |        |        |        |        |        |        |        |           |          |                         |
|---------------|--------|--------|--------|--------|--------|--------|--------|--------|--------|--------|-----------|----------|-------------------------|
| Mib2          | 2.240  | 0.910  | 2.453  | 0.770  | 2.549  | 1.892  | 2.806  | 2.679  | 3.927  | 3.661  | 76580     | MIB2     | NM_001256107_4_-1       |
| Mib2          | 2.704  | 1.238  | 0.511  | -0.469 | 1.138  | -0.181 | 1.801  | -0.116 | 0.371  | 0.411  | 76580     | MIB2     | NM_001256108_4_-1       |
| Mtfr1l        | 4.530  | 4.631  | 4.389  | 4.127  | 4.891  | 4.217  | 4.844  | 4.213  | 5.235  | 4.222  | 76824     | MTFR1L   | NM_001256112_4_-1       |
| Sun1          | -3.684 | -2.273 | -1.824 | 0.882  | -0.935 | -0.352 | 1.070  | -0.454 | 1.471  | 1.776  | 77053     | SUN1     | NM_001256115_5_+1       |
| Sun1          | -0.181 | 0.738  | 0.073  | -3.958 | -0.965 | -0.002 | 0.794  | -1.372 | 2.124  | 1.790  | 77053     | SUN1     | NM_001256116_5_+1       |
| Sun1          | -3.062 | -1.527 | -2.549 | -3.686 | -2.872 | 0.452  | -2.910 | -4.566 | 0.021  | 0.365  | 77053     | SUN1     | NM_001256117_5_+1       |
| Sun1          | 3.705  | 3.350  | 1.487  | 1.214  | 1.058  | 0.729  | 1.508  | -0.143 | -1.414 | 0.349  | 77053     | SUN1     | NM_001256118_5_+1       |
| Nipa2         | 4.468  | 3.778  | 4.977  | 4.984  | 4.809  | 4.422  | 5.042  | 4.850  | 5.549  | 5.850  | 93790     | NIPA2    | NM_001256130_7_-1       |
| Nipa2         | 1.317  | 0.066  | 2.096  | 0.101  | 1.453  | 0.054  | 2.503  | 0.364  | 3.542  | 2.088  | 93790     | NIPA2    | NM_001256131_7_-1       |
| Nipa2         | -0.649 | -1.771 | 0.537  | 0.157  | -0.814 | -2.104 | -1.261 | -2.986 | -1.434 | 1.188  | 93790     | NIPA2    | NM_001256132_7_-1       |
| Nipa2         | -1.973 | -2.206 | -2.061 | -1.341 | -3.461 | -3.790 | -1.081 | -3.777 | -0.082 | 0.307  | 93790     | NIPA2    | NM_001256133_7_-1       |
| Fsbp          | -4.460 | -4.981 | -0.492 | -2.820 | -1.631 | -3.579 | -2.717 | -4.704 | -2.045 | -4.765 | 100503583 | FSBP     | NM_001256142_4_+1       |
| Rad54b        | -3.471 | -4.981 | -1.006 | -1.199 | 0.179  | -1.022 | -0.716 | -1.637 | -3.388 | -4.471 | 623474    | RAD54B   | NM_001256145_4_+1       |
| 9430069107Rik | -3.843 | -4.981 | -2.738 | -4.361 | -4.076 | -4.478 | -4.931 | -4.686 | -1.893 | -2.638 | 77358     | NA       | NM_001256161_15_-1      |
| Eif4g3        | 4.598  | 4.899  | 5.996  | 5.824  | 5.832  | 6.085  | 5.987  | 6.049  | 6.169  | 6.153  | 230861    | EIF4G3   | NM_001256195_4_+1       |
| Eif4g3        | 1.560  | 0.569  | 2.784  | 2.412  | 2.517  | 2.000  | 2.816  | 2.547  | 4.564  | 4.522  | 230861    | EIF4G3   | NM_001256198_4_+1       |
| Rap1gap       | -4.791 | -3.357 | -2.189 | -3.475 | -3.792 | -3.884 | -1.928 | -3.708 | -3.045 | -1.490 | 110351    | RAP1GAP  | NM_001256218_4_+1       |
| E030018B13Rik | -2.099 | -4.981 | -4.474 | -3.842 | -2.905 | -4.200 | -2.763 | -3.842 | -2.379 | -2.000 | 381994    | NA       | NM_001256311_7_+1       |
| Prdm2         | 5.162  | 4.945  | 5.260  | 5.205  | 5.293  | 5.172  | 4.922  | 4.892  | 4.636  | 4.569  | 110593    | PRDM2    | NM_001256380_4_-1       |
| Agap3         | -4.981 | -3.251 | -0.712 | -0.574 | -2.858 | -2.922 | -2.349 | -2.349 | -0.168 | -1.353 | 213990    | AGAP3    | NM_001256431_5_+1       |
| Gm4724        | -1.818 | 0.586  | -1.578 | -0.952 | -0.433 | 0.118  | -1.284 | -1.443 | -2.558 | -0.137 | 100043915 | ZNF442   | NM_001256480_2_-1       |
| Gm4724        | -1.533 | -1.848 | -2.477 | -2.972 | -3.380 | -3.625 | -1.960 | -3.969 | -2.558 | -2.468 | 100043915 | ZNF442   | NM_001256480_dup1_2_-2  |
| Gm4724        | -1.335 | 0.124  | -0.268 | 0.030  | -0.736 | -0.728 | 0.094  | 0.047  | -0.539 | -0.180 | 100043915 | ZNF442   | NM_001256480_dup2_2_+1  |
| Gm4724        | -1.533 | -1.848 | -1.889 | -2.942 | -2.930 | -3.045 | -2.944 | -3.837 | -2.558 | -2.446 | 100043915 | ZNF442   | NM_001256480_dup3_2_+2  |
| Gm4724        | -1.655 | -2.119 | -2.583 | -3.450 | -3.559 | -3.674 | -2.699 | -4.051 | -2.558 | -3.072 | 100043915 | ZNF442   | NM_001256480_dup4_2_-3  |
| Gm4724        | -1.655 | -2.039 | -2.580 | -3.337 | -3.506 | -3.058 | -2.749 | -4.050 | -2.558 | -3.072 | 100043915 | ZNF442   | NM_001256480_dup5_2_-4  |
| 9030624G23Rik | -2.336 | -1.595 | -2.013 | -2.564 | -2.350 | -3.208 | -2.964 | -3.499 | -1.230 | -1.816 | 66808     | NA       | NM_001256489_12_-1      |
| Zfp995        | 3.394  | 3.284  | 3.179  | 3.088  | 3.099  | 2.896  | 3.447  | 2.891  | 2.749  | 3.490  | 70081     | NA       | NM_001256493_17_-1      |
| Gm10408       | -4.185 | -4.981 | -4.972 | -4.962 | -4.838 | -4.849 | -4.847 | -4.951 | -4.476 | -4.503 | 100041840 | NA       | NM_001256501_14_+1      |
| Gm10408       | -4.077 | -4.981 | -4.976 | -4.969 | -4.777 | -4.725 | -4.844 | -4.948 | -4.403 | -4.430 | 100041840 | NA       | NM_001256501_dup1_14_+1 |
| Al837181      | 0.347  | 1.990  | 0.666  | 0.702  | 0.518  | -0.190 | 0.473  | 0.612  | 2.393  | 1.124  | 107242    | C11orf68 | NM_001256515_19_+1      |
| Zfp672        | 1.540  | 2.531  | 0.927  | 1.683  | -0.257 | 1.473  | 1.256  | 1.473  | 2.507  | 2.856  | 319475    | ZNF672   | NM_001256516_11_-1      |
| Zfp672        | 1.286  | 2.066  | 0.471  | 1.208  | 0.713  | 1.352  | 0.276  | 0.493  | 0.424  | 2.152  | 319475    | ZNF672   | NM_001256517_11_-1      |
| Zfp672        | 0.958  | -1.532 | -0.220 | 0.740  | -0.487 | -2.069 | -0.919 | -0.445 | 1.431  | 1.270  | 319475    | ZNF672   | NM_001256518_11_-1      |
| Zfp672        | -4.357 | -4.268 | -0.547 | -2.462 | -1.671 | -4.782 | -0.724 | -3.220 | -1.116 | -3.908 | 319475    | ZNF672   | NM_001256519_11_-1      |
| Zfp672        | -4.163 | -2.849 | -0.612 | -4.440 | 0.381  | -2.344 | -3.086 | -4.659 | -0.207 | -2.875 | 319475    | ZNF672   | NM_001256520_11_-1      |
| C330006A16Rik | 4.063  | 3.701  | 3.073  | 2.397  | 2.321  | 3.335  | 2.769  | 2.435  | 2.061  | 2.119  | 109299    | C9orf69  | NM_001256521_2_-1       |
| C330006A16Rik | 4.188  | 4.391  | 2.590  | 2.998  | 3.294  | 2.236  | 2.444  | 3.029  | 2.908  | 2.597  | 109299    | C9orf69  | NM_001256522_2_-1       |
| Gm3488        | -4.007 | -3.759 | -4.181 | -4.808 | -4.929 | -2.969 | -4.064 | -4.748 | -4.981 | -4.981 | 100041735 | NA       | NM_001256885_14_+1      |
| Gm3488        | 0.710  | -3.759 | -2.507 | -4.720 | -4.877 | -1.167 | -4.037 | -4.794 | -4.981 | -4.981 | 100041735 | NA       | NM_001256885_dup1_14_+1 |
| Gm3500        | -2.082 | -4.981 | -4.703 | -3.696 | -4.882 | -0.161 | -4.975 | -3.778 | -4.981 | -4.981 | 100041678 | NA       | NM_001256886_14_-1      |
| Gm3500        | -2.723 | -0.662 | -3.506 | -3.403 | -4.470 | 0.317  | -4.976 | -4.559 | -4.981 | -4.981 | 100041678 | NA       | NM_001256886_dup1_14_-2 |
| Rpl31-ps12    | 1.654  | 2.249  | 0.389  | -0.015 | -0.288 | -0.666 | -0.299 | -0.398 | -0.625 | -0.491 | 665562    | NA       | NM_001258458_16_-1      |
| Zfp811        | -4.981 | -3.504 | -4.258 | -3.480 | -4.629 | -3.884 | -3.677 | -3.242 | -3.879 | -2.457 | 240063    | NA       | NM_001267583_17_-1      |
| Cant1         | 3.246  | 3.936  | 2.793  | 2.830  | 2.876  | 2.973  | 3.249  | 3.658  | 2.719  | 2.310  | 76025     | CANT1    | NM_001267591_11_-1      |
| Cant1         | -4.623 | 0.105  | -2.516 | -0.112 | -2.300 | -0.651 | -1.818 | -0.463 | -0.136 | 0.771  | 76025     | CANT1    | NM_001267592_11_-1      |
| Ankzf1        | 2.360  | 1.878  | 1.720  | 1.340  | 1.600  | 0.511  | 1.304  | -0.124 | 1.181  | 0.428  | 52231     | ANKZF1   | NM_001267620_1_+1       |
| Gfi1          | -0.617 | -0.688 | -2.582 | -1.280 | 0.836  | -0.740 | 0.319  | 0.829  | 0.309  | -4.981 | 14581     | GFI1     | NM_001267621_5_-1       |
| Ttc28         | 0.283  | 2.772  | 0.009  | 2.215  | 0.736  | 2.148  | 0.371  | 2.058  | 0.058  | 1.530  | 209683    | TTC28    | NM_001267622_5_+1       |
| Dpf3          | -4.981 | -4.981 | -2.082 | -0.800 | -3.210 | -1.504 | -3.234 | -1.756 | -2.857 | -1.427 | 70127     | DPF3     | NM_001267626_12_-1      |
| Ctss          | 7.479  | 7.281  | 6.500  | 6.323  | 6.833  | 6.578  | 7.677  | 7.245  | 7.805  | 7.470  | 13040     | CTSS     | NM_001267695_3_+1       |
| LOC100861978  | -3.975 | -3.678 | -4.518 | -4.214 | -4.964 | -4.923 | -4.961 | -4.498 | -4.651 | -4.580 | 100861978 | NA       | NM_001267702_4_+1       |
| LOC100861978  | -3.975 | -3.678 | -4.662 | -4.509 | -4.964 | -4.923 | -4.980 | -4.979 | -4.651 | -4.580 | 100861978 | NA       | NM_001267702_dup1_4_+2  |
| LOC100861978  | -2.545 | -2.245 | -4.572 | -4.248 | -4.780 | -4.848 | -4.660 | -4.599 | -4.981 | -3.232 | 100861978 | NA       | NM_001267703_4_+1       |
| LOC100861978  | -4.789 | -2.134 | -4.211 | -4.236 | -4.780 | -4.848 | -4.641 | -4.891 | -4.981 | -3.232 | 100861978 | NA       | NM_001267703_dup1_4_+2  |
| LOC100861978  | -4.981 | -4.981 | -4.960 | -4.591 | -4.977 | -4.962 | -4.974 | -4.834 | -4.981 | -4.981 | 100861978 | NA       | NM_001267704_4_+1       |
| LOC100861978  | -4.981 | -4.981 | -4.960 | -4.591 | -4.977 | -4.962 | -4.979 | -4.976 | -4.981 | -4.981 | 100861978 | NA       | NM_001267704_dup1_4_+2  |
| Eef2k         | 2.280  | 0.365  | 0.326  | 0.127  | 2.208  | 1.892  | 1.456  | 0.705  | -4.215 | -2.068 | 13631     | EEF2K    | NM_001267710_7_+1       |
| Eef2k         | -3.786 | -3.493 | -1.139 | -3.701 | -0.174 | -1.093 | 0.657  | 0.046  | -1.453 | -1.853 | 13631     | EEF2K    | NM_001267711_7_+1       |
| Pex2          | 3.546  | 3.583  | 2.604  | 2.427  | 1.862  | 0.910  | 2.570  | 2.416  | 3.147  | 2.162  | 19302     | PEX2     | NM_001267714_3_-1       |
| Pex2          | 5.369  | 5.348  | 4.786  | 4.853  | 4.575  | 4.490  | 4.635  | 4.585  | 5.188  | 5.055  | 19302     | PEX2     | NM_001267715_3_-1       |
| Nrep          | -4.981 | -4.981 | 0.159  | -0.673 | -1.839 | -3.404 | -2.828 | -1.877 | -2.808 | -2.581 | 27528     | NREP     | NM_001267717_18_-1      |
| Asb13         | -4.819 | -4.807 | -2.337 | -3.991 | -2.641 | -4.954 | -0.524 | -3.870 | -2.682 | -2.313 | 142688    | ASB13    | NM_001267724_13_+1      |
| Igip          | 0.594  | 1.332  | 1.198  | 1.210  | 0.893  | 0.608  | 0.997  | 0.175  | 0.284  | 0.620  | 109169    | IGIP     | NM_001267796_18_+1      |
| H2-L          | 3.028  | 2.870  | 2.903  | 3.033  | 2.787  | 2.214  | 3.062  | 2.601  | 3.653  | 2.685  | 14980     | NA       | NM_001267808_17_+1      |
| Zdbf2         | -4.981 | -4.981 | -4.970 | -3.676 | -4.979 | -4.235 | -4.981 | -4.981 | -4.981 | -4.981 | 73884     | ZDBF2    | NM_001267872_1_+1       |
| Ptprc         | 5.483  | 5.758  | 5.761  | 5.754  | 6.048  | 7.011  | 6.829  | 7.442  | 7.810  | 9.135  | 19264     | PTPRC    | NM_001268286_1_-1       |
| Gm21541       | -4.981 | -4.566 | -4.970 | -4.962 | -4.981 | -4.981 | -4.832 | -4.930 | -4.981 | -4.981 | 100862177 | CCL21    | NM_001270360_4_+1       |
| Gm21541       | -4.981 | -4.566 | -4.966 | -4.904 | -4.981 | -4.981 | -4.631 | -4.916 | -4.981 | -4.981 | 100862177 | CCL21    | NM_001270360_dup1_4_+2  |
| Gm21541       | -4.981 | -4.566 | -4.966 | -4.904 | -4.981 | -4.981 | -4.631 | -4.916 | -4.981 | -4.981 | 100862177 | CCL21    | NM_001270360_dup2_4_+3  |
| Gm21541       | -4.981 | -4.566 | -4.970 | -4.962 | -4.981 | -4.981 | -4.832 | -4.930 | -4.981 | -4.981 | 100862177 | CCL21    | NM_001270360_dup3_4_+4  |
| Gm20878       | -2.632 | -1.864 | -3.442 | -4.730 | -4.919 | -4.807 | -4.304 | -4.939 | -3.675 | -4.487 | 100041579 | NA       | NM_001270431_4_+1       |
| Gm20878       | -2.632 | -1.864 | -3.442 | -4.730 | -4.919 | -4.807 | -4.882 | -4.914 | -3.675 | -4.487 | 100041579 | NA       | NM_001270431_dup1_4_+2  |
| Gm20878       | -2.632 | -1.864 | -3.442 | -4.730 | -4.919 | -4.807 | -4.882 | -4.914 | -3.675 | -4.487 | 100041579 | NA       | NM_001270431_dup2_4_+3  |

|                |        |        |        |        |        |        |        |        |        |        |                 |         |                         |
|----------------|--------|--------|--------|--------|--------|--------|--------|--------|--------|--------|-----------------|---------|-------------------------|
| Gm21586        | -2.632 | -1.864 | -3.442 | -4.730 | -4.919 | -4.807 | -4.304 | -4.939 | -3.675 | -4.487 | 100862247       | NA      | NM_001270432_4_+1       |
| Gm21586        | -2.632 | -1.864 | -3.442 | -4.730 | -4.919 | -4.807 | -4.882 | -4.914 | -3.675 | -4.487 | 100862247       | NA      | NM_001270432_dup1_4_+2  |
| Gm21586        | -2.632 | -1.864 | -3.442 | -4.730 | -4.919 | -4.807 | -4.882 | -4.914 | -3.675 | -4.487 | 100862247       | NA      | NM_001270432_dup2_4_+3  |
| Ccdc30         | -4.981 | -3.489 | -4.981 | -4.981 | -4.966 | -4.966 | -4.981 | -4.981 | -4.981 | -4.981 | 73332           | NA      | NM_001270435_4_-1       |
| Ccdc30         | -1.763 | -4.981 | -3.554 | -3.481 | -3.390 | -4.888 | -4.977 | -3.022 | -4.538 | -3.387 | 73332           | NA      | NM_001270446_4_-1       |
| Mical3         | 0.555  | 0.606  | 2.450  | 3.060  | 4.394  | 3.881  | 3.028  | 1.758  | -0.068 | 0.305  | 194401          | MICAL3  | NM_001270475_6_-1       |
| Gm19345        | -0.259 | -0.911 | -2.406 | -1.963 | 1.948  | 1.787  | -0.634 | -1.516 | -4.981 | -3.209 | 100502736       | NA      | NM_001270495_dup2_14_-1 |
| Tmem254b       | 8.123  | 6.165  | 4.713  | 4.056  | 4.567  | 3.737  | 4.330  | 3.733  | 3.748  | 3.398  | 100039257       | NA      | NM_001270495_14_-1      |
| Tmem254b       | 4.521  | 3.043  | 2.134  | 0.445  | 1.577  | 0.263  | 1.888  | 0.486  | 0.998  | 1.097  | 100039257       | NA      | NM_001270495_dup1_14_-2 |
| Tmem254b       | 7.777  | 6.242  | 2.134  | 0.445  | 1.598  | 0.273  | 1.880  | 0.592  | 0.998  | 1.097  | 100039257       | NA      | NM_001270495_dup2_14_-3 |
| Tmem254b       | 2.693  | 1.076  | -0.750 | -2.599 | -2.784 | -2.848 | -1.669 | -3.180 | -4.553 | -3.251 | 100039257       | NA      | NM_001270496_14_-1      |
| Tmem254b       | -1.289 | -2.153 | -3.321 | -4.506 | -4.165 | -4.565 | -4.119 | -4.805 | -4.611 | -4.471 | 100039257       | NA      | NM_001270496_dup1_14_-2 |
| Tmem254b       | 1.524  | -1.803 | -3.321 | -4.506 | -4.165 | -4.565 | -4.119 | -4.787 | -4.611 | -4.471 | 100039257       | NA      | NM_001270496_dup2_14_-3 |
| Tmem254c       | 6.014  | 4.209  | 3.040  | 1.559  | 1.834  | 1.726  | 1.972  | 1.519  | 2.774  | 1.547  | 100039192       | NA      | NM_001270498_14_-1      |
| Tmem254c       | 2.435  | 0.669  | 0.600  | -2.424 | -0.885 | -2.851 | -0.440 | -2.508 | -0.188 | -1.520 | 100039192       | NA      | NM_001270498_dup1_14_-2 |
| Tmem254c       | 5.856  | 4.538  | 0.600  | -2.424 | -0.907 | -2.855 | -0.445 | -2.299 | -0.188 | -1.520 | 100039192       | NA      | NM_001270498_dup2_14_-3 |
| Tmem254c       | 3.168  | 1.697  | -1.364 | -3.065 | -1.288 | -4.648 | -1.727 | -4.963 | -1.437 | -0.320 | 100039192       | NA      | NM_001270499_14_-1      |
| Tmem254c       | -1.763 | -1.787 | -3.588 | -4.853 | -3.344 | -4.900 | -3.983 | -4.961 | -2.742 | -2.963 | 100039192       | NA      | NM_001270499_dup1_14_-2 |
| Tmem254c       | 2.318  | -1.603 | -3.588 | -4.853 | -3.344 | -4.900 | -3.983 | -4.960 | -2.742 | -2.963 | 100039192       | NA      | NM_001270499_dup2_14_-3 |
| Plac9b         | -3.265 | -4.981 | -4.976 | -4.976 | -4.959 | -4.959 | -4.977 | -4.979 | -4.981 | -4.981 | 100039246       | NA      | NM_001270503_14_-1      |
| Plac9b         | -3.265 | -4.981 | -4.976 | -4.976 | -4.959 | -4.959 | -4.977 | -4.979 | -4.981 | -4.981 | 100039246       | NA      | NM_001270503_dup1_14_-2 |
| Plac9b         | -3.265 | -4.981 | -4.976 | -4.976 | -4.959 | -4.959 | -4.977 | -4.979 | -4.981 | -4.981 | 100039246       | NA      | NM_001270503_dup2_14_-3 |
| Bin2           | 7.093  | 7.323  | 7.582  | 7.606  | 8.402  | 8.242  | 8.483  | 8.681  | 9.683  | 9.685  | 668218          | BIN2    | NM_001270537_15_-1      |
| Gm21119        | -4.981 | -4.981 | -4.389 | -4.931 | -4.772 | -4.968 | -4.968 | -4.975 | -4.981 | -4.981 | 100861668       | NA      | NM_001270553_8_+1       |
| Gm21119        | -4.981 | -4.981 | -3.787 | -4.909 | -4.861 | -4.975 | -4.977 | -4.979 | -4.981 | -4.981 | 100861668       | NA      | NM_001270553_dup1_8_+2  |
| Prob1          | -0.841 | -2.681 | -3.709 | -3.104 | -4.916 | -3.854 | -4.099 | -2.701 | -4.981 | -4.981 | 381148          | PROB1   | NM_001270646_18_-1      |
| Ifitm7         | -4.981 | -4.981 | -4.590 | -4.530 | -4.975 | -4.975 | -4.973 | -4.967 | -4.264 | -4.981 | 74482           | NA      | NM_001270718_16_-1      |
| Iba57          | -4.981 | -4.981 | -4.434 | -4.796 | -4.735 | -4.898 | -4.987 | -4.641 | -3.922 | -4.981 | 216792          | IBA57   | NM_001270791_11_-1      |
| Gm5795         | -4.981 | -4.981 | -4.969 | -4.969 | -4.973 | -4.844 | -4.981 | -4.981 | -4.981 | -4.981 | 544990          | NA      | NM_001270806_14_+2      |
| Gm5795         | -4.981 | -4.981 | -4.969 | -4.969 | -4.973 | -4.844 | -4.981 | -4.981 | -4.981 | -4.981 | 544990          | NA      | NM_001270806_dup1_14_+3 |
| Gm5795         | -4.981 | -4.981 | -4.969 | -4.969 | -4.973 | -4.844 | -4.981 | -4.981 | -4.981 | -4.981 | 544990          | NA      | NM_001270806_dup2_14_+4 |
| LOC100861615   | -0.587 | -0.099 | -3.294 | -2.427 | -4.872 | 3.229  | -4.767 | -2.940 | -4.981 | -4.330 | 100861615       | NA      | NM_001270812_14_-1      |
| Gm3558         | -1.455 | -1.383 | -3.637 | -4.165 | -4.463 | 1.189  | -4.979 | -4.107 | -4.981 | -4.981 | 100041874       | NA      | NM_001270842_14_-1      |
| Asxl2          | 5.409  | 5.098  | 5.703  | 5.505  | 5.201  | 5.321  | 4.821  | 5.018  | 4.482  | 4.473  | 75302           | ASXL2   | NM_001270988_12_+1      |
| Adam9          | 2.586  | -2.076 | 3.433  | -1.120 | 3.778  | -2.435 | 4.422  | -0.097 | 5.828  | -1.075 | 11502           | ADAM9   | NM_001270996_8_-1       |
| Gfra4          | -4.981 | -4.981 | -4.951 | -2.803 | -3.978 | -4.327 | -4.949 | -3.347 | -4.981 | -4.981 | 14588           | GFRA4   | NM_001271001_2_-1       |
| Gfra4          | -4.981 | -4.981 | -4.965 | -4.671 | -4.763 | -4.920 | -4.963 | -4.804 | -4.981 | -4.981 | 14588           | GFRA4   | NM_001271002_2_-1       |
| H2-T-ps        | 6.518  | 6.319  | 6.036  | 6.125  | 6.399  | 6.366  | 5.905  | 5.713  | 4.528  | 3.903  | 667803          | HLA-E   | NM_001271005_17_-1      |
| Ube2w          | -4.981 | 0.382  | -1.814 | -1.419 | -2.011 | -1.965 | -2.210 | -3.084 | -3.023 | -4.017 | 66799           | UBE2W   | NM_001271016_1_-1       |
| Ube2w          | 1.688  | 1.357  | 1.424  | 0.756  | 0.999  | -0.210 | 1.274  | 0.433  | 1.065  | 0.883  | 66799           | UBE2W   | NM_001271017_1_-1       |
| SiglecF        | -2.609 | -4.981 | -4.213 | -2.025 | -1.209 | -1.456 | -2.504 | -3.870 | -4.235 | -3.292 | 233186          | SIGLEC8 | NM_001271019_7_+1       |
| Ate1           | 2.182  | 3.263  | 3.326  | 2.846  | 2.599  | 2.518  | 2.787  | 2.062  | 1.709  | 1.423  | 11907           | ATE1    | NM_001271343_7_-1       |
| Fbxw11         | 1.721  | -2.041 | -1.637 | -1.054 | 1.561  | 0.616  | -1.507 | 0.283  | 0.772  | 1.367  | 103583          | FBXW11  | NM_001271347_11_+1      |
| Fbxw11         | 3.409  | 3.575  | 4.482  | 4.475  | 4.165  | 4.308  | 4.118  | 3.344  | 5.296  | 5.171  | 103583          | FBXW11  | NM_001271348_11_+1      |
| Fbxw11         | 3.423  | 4.565  | 4.569  | 4.539  | 4.232  | 3.809  | 4.788  | 4.580  | 4.790  | 5.223  | 103583          | FBXW11  | NM_001271349_11_+1      |
| Flcn           | -2.473 | -2.873 | -4.393 | -0.080 | -4.418 | -0.925 | -4.124 | -2.535 | -4.340 | 0.501  | 216805          | FLCN    | NM_001271356_11_-1      |
| Flcn           | 4.067  | 4.463  | 3.796  | 3.755  | 4.163  | 3.894  | 4.505  | 4.537  | 4.262  | 5.146  | 216805          | FLCN    | NM_001271357_11_-1      |
| Arrb2          | 0.715  | -0.848 | 1.501  | 1.363  | 2.306  | 2.060  | 2.404  | 1.994  | 2.732  | 2.942  | 216869          | ARRB2   | NM_001271358_11_+1      |
| Arrb2          | -2.740 | -0.319 | -3.909 | -3.351 | -2.237 | -0.953 | -1.523 | -2.335 | 1.669  | 0.466  | 216869          | ARRB2   | NM_001271359_11_+1      |
| Arrb2          | 2.094  | 1.039  | 0.715  | 0.970  | 1.564  | 1.102  | 2.209  | 1.119  | 3.305  | 2.454  | 216869          | ARRB2   | NM_001271360_11_+1      |
| Dyrk1b         | -1.445 | -3.321 | -4.307 | -4.663 | -3.240 | -4.924 | -4.617 | -1.038 | -0.112 | -3.943 | 13549           | DYRK1B  | NM_001271370_7_+1       |
| Milr1          | -2.218 | 0.273  | -3.608 | -4.913 | -3.007 | -3.314 | -3.663 | -4.832 | -4.826 | -1.764 | 380732          | NA      | NM_001271372_11_+1      |
| Milr1          | -2.634 | -1.504 | -4.934 | -4.975 | -3.201 | -3.483 | -4.865 | -2.892 | -3.064 | -4.981 | 380732          | NA      | NM_001271373_11_+1      |
| Milr1          | 2.388  | 2.030  | 0.804  | 0.148  | 1.576  | 0.048  | 2.384  | 1.204  | 3.374  | 2.771  | 380732          | NA      | NM_001271374_11_+1      |
| Milr1          | 2.397  | 2.402  | 1.417  | 0.877  | 1.929  | 1.741  | 1.595  | 2.090  | 2.999  | 2.740  | 380732          | NA      | NM_001271375_11_+1      |
| Hdac9          | 2.249  | 1.770  | 2.558  | 3.280  | 2.212  | 2.964  | 1.363  | 1.811  | 3.178  | 3.861  | 79221           | HDAC9   | NM_001271386_12_-1      |
| Ankra2         | 3.614  | 3.415  | 3.136  | 2.882  | 3.188  | 2.837  | 3.203  | 3.090  | 3.687  | 3.082  | 68558           | ANKRA2  | NM_001271388_13_+1      |
| Ankra2         | 1.629  | 1.229  | 0.667  | -0.192 | 1.195  | 0.015  | 0.856  | 0.095  | 0.449  | 0.038  | 68558           | ANKRA2  | NM_001271389_13_+1      |
| Ankra2         | 0.044  | 0.823  | 0.057  | -0.368 | -0.315 | -0.230 | 0.493  | -0.203 | 0.047  | 0.250  | 68558           | ANKRA2  | NM_001271390_13_+1      |
| Ankra2         | 0.070  | 1.010  | 0.050  | -0.812 | -0.308 | 0.580  | 0.307  | -1.323 | -1.919 | 0.085  | 68558           | ANKRA2  | NM_001271391_13_+1      |
| Ankra2         | -2.484 | -4.981 | -3.756 | -4.933 | -2.923 | -3.967 | -3.385 | -4.934 | -4.769 | -2.405 | 68558           | ANKRA2  | NM_001271392_13_+1      |
| Capg           | 3.798  | 1.225  | -4.656 | -0.948 | -4.893 | 0.024  | -4.589 | 1.669  | 3.942  | 2.449  | 12332           | CAPG    | NM_001271395_6_+1       |
| Nol8           | 4.288  | 4.304  | 4.220  | 4.442  | 4.222  | 4.569  | 4.166  | 3.910  | 2.631  | 3.237  | 70930           | NOL8    | NM_001271397_13_+1      |
| Ephx2          | -1.225 | -3.585 | -4.593 | -4.862 | -2.598 | -4.928 | -2.803 | -4.813 | -4.913 | -4.940 | 13850           | EPHX2   | NM_001271402_14_-1      |
| Ephx2          | -1.769 | 0.145  | -0.692 | -2.212 | -4.561 | -3.634 | -4.817 | -4.936 | -4.325 | -3.297 | 13850           | EPHX2   | NM_001271403_14_-1      |
| CapzB          | 1.641  | 2.226  | 1.924  | 1.574  | 2.617  | 3.072  | 1.369  | 1.683  | 2.324  | 2.990  | 12345           | CAPZB   | NM_001271405_4_+1       |
| Record_removed | 3.723  | 2.645  | 3.879  | 3.388  | 3.591  | 2.655  | 3.143  | 2.883  | 2.209  | 2.714  | Record_removeNA |         | NM_001271406_4_+1       |
| Sorbs3         | -4.685 | -4.981 | -4.958 | -4.965 | -4.957 | -4.408 | -2.920 | -2.606 | -4.981 | -1.810 | 20410           | SORBS3  | NM_001271407_14_-1      |
| Sorbs3         | -3.526 | -4.981 | -4.434 | -4.610 | -4.919 | -4.348 | -2.931 | -3.588 | -4.981 | -4.843 | 20410           | SORBS3  | NM_001271408_14_-1      |
| Sorbs3         | -0.423 | 0.084  | 0.520  | 1.605  | -3.240 | -2.439 | -0.746 | -0.642 | -1.933 | -2.847 | 20410           | SORBS3  | NM_001271409_14_-1      |
| Nfam1          | 6.357  | 6.358  | 7.043  | 7.106  | 8.298  | 8.173  | 8.566  | 8.539  | 9.921  | 9.757  | 74039           | NFAM1   | NM_001271411_15_-1      |
| Nfam1          | 0.635  | 1.247  | 0.265  | 0.231  | 1.845  | 2.130  | 1.891  | 2.310  | 4.386  | 4.270  | 74039           | NFAM1   | NM_001271412_15_-1      |
| Nfam1          | -3.820 | -3.546 | -1.868 | -3.063 | -2.611 | -2.424 | -1.229 | -2.008 | 0.774  | -0.198 | 74039           | NFAM1   | NM_001271413_15_-1      |
| Nfam1          | -1.294 | -0.115 | -0.058 | -0.692 | 0.309  | 0.060  | -1.206 | -0.988 | 2.240  | 1.375  | 74039           | NFAM1   | NM_001271414_15_-1      |

|           |        |        |        |        |        |        |        |        |        |        |        |          |                     |
|-----------|--------|--------|--------|--------|--------|--------|--------|--------|--------|--------|--------|----------|---------------------|
| Capg      | -0.798 | -4.145 | -4.765 | -4.896 | -4.918 | -4.964 | -4.658 | -4.836 | -1.967 | -4.832 | 12332  | CAPG     | NM_001271415_6_+_1  |
| Ly6a      | 4.135  | 7.615  | -1.907 | 3.833  | -2.097 | 0.883  | -2.552 | 0.223  | -4.397 | -2.777 | 110454 | NA       | NM_001271416_15_-_1 |
| Ly6a      | 7.246  | 10.915 | 2.122  | 7.204  | -1.139 | 2.667  | -0.343 | 4.508  | -4.376 | 1.735  | 110454 | NA       | NM_001271417_15_-_1 |
| Ly6a      | 4.725  | 9.058  | -1.799 | 5.150  | -2.248 | 2.009  | -3.850 | 2.877  | -1.470 | -1.960 | 110454 | NA       | NM_001271418_15_-_1 |
| Ly6a      | 11.301 | 9.402  | 6.000  | 5.762  | 2.760  | 1.139  | 5.278  | 3.266  | 3.146  | 0.616  | 110454 | NA       | NM_001271419_15_-_1 |
| Ephx2     | -3.817 | -3.180 | -4.290 | -4.649 | -4.850 | -4.949 | -4.893 | -4.959 | -4.721 | -4.739 | 13850  | EPHX2    | NM_001271421_14_-_1 |
| Ager      | -4.053 | -4.981 | -4.270 | -3.125 | -2.829 | -3.747 | -3.612 | -4.919 | -4.354 | -4.966 | 11596  | AGER     | NM_001271422_17_+_1 |
| Ager      | -3.284 | -4.981 | -4.307 | -4.823 | -4.895 | -3.633 | -0.732 | -4.982 | -1.988 | -4.958 | 11596  | AGER     | NM_001271423_17_+_1 |
| Ager      | -4.721 | -4.981 | -4.343 | -4.966 | -3.735 | -3.848 | -4.739 | -4.961 | -4.893 | -2.277 | 11596  | AGER     | NM_001271424_17_+_1 |
| Cd82      | 3.209  | 3.315  | 3.869  | 3.654  | 4.016  | 4.361  | 3.331  | 3.310  | 2.714  | 2.479  | 12521  | CD82     | NM_001271430_2_-_1  |
| Cd82      | 3.885  | 4.720  | 4.687  | 3.647  | 4.532  | 3.397  | 4.228  | 3.606  | 2.763  | 1.202  | 12521  | CD82     | NM_001271431_2_-_1  |
| Cd82      | -4.608 | -4.386 | -4.731 | -3.548 | -2.596 | -3.070 | -4.596 | -4.939 | -4.731 | -4.918 | 12521  | CD82     | NM_001271432_2_-_1  |
| Haghl     | 4.825  | 4.148  | 4.124  | 3.068  | 4.607  | 4.546  | 4.473  | 3.661  | 4.316  | 3.150  | 68977  | HAGHL    | NM_001271433_17_-_1 |
| Haghl     | -0.835 | -1.423 | -1.109 | -1.274 | -0.898 | -1.473 | -2.268 | -2.449 | -0.521 | -0.939 | 68977  | HAGHL    | NM_001271434_17_-_1 |
| Haghl     | -0.557 | -1.430 | -1.988 | -0.095 | -0.133 | -0.507 | -0.231 | -0.443 | 0.206  | 0.765  | 68977  | HAGHL    | NM_001271435_17_-_1 |
| Haghl     | 0.891  | 0.868  | -0.018 | 0.323  | 0.154  | 1.078  | 0.083  | 0.527  | -1.176 | -0.457 | 68977  | HAGHL    | NM_001271436_17_-_1 |
| Haghl     | 3.108  | 3.373  | 1.122  | 2.986  | 2.343  | 3.745  | 2.024  | 2.601  | 0.989  | 2.289  | 68977  | HAGHL    | NM_001271437_17_-_1 |
| Ndufs8    | 8.391  | 8.148  | 7.519  | 7.486  | 7.295  | 7.244  | 7.648  | 7.585  | 7.007  | 6.798  | 225887 | NDUFS8   | NM_001271443_19_-_1 |
| Ndufs8    | 2.629  | 2.732  | 1.418  | 0.676  | 0.619  | 0.065  | 1.199  | 0.380  | 0.063  | 0.582  | 225887 | NDUFS8   | NM_001271444_19_-_1 |
| Ly6a      | 0.881  | 8.220  | -4.123 | 4.845  | -4.526 | 0.374  | -4.115 | 1.918  | -4.315 | -1.034 | 110454 | NA       | NM_001271446_15_-_1 |
| Enox2     | 2.261  | 2.940  | -2.877 | 3.317  | 3.759  | 3.732  | 3.942  | 3.047  | 3.329  | 2.670  | 209224 | ENOX2    | NM_001271447_X_-_1  |
| Enox2     | 0.618  | -4.196 | 0.293  | 0.149  | -1.035 | -0.424 | -1.190 | -3.024 | -1.636 | -2.277 | 209224 | ENOX2    | NM_001271448_X_-_1  |
| Enox2     | -3.452 | -3.570 | -3.341 | 0.122  | -0.210 | -3.668 | -4.297 | -4.274 | -4.187 | -4.190 | 209224 | ENOX2    | NM_001271449_X_-_1  |
| Enox2     | -0.641 | -4.228 | -0.599 | 0.962  | 0.885  | 0.392  | -0.309 | 0.071  | -0.264 | -0.201 | 209224 | ENOX2    | NM_001271450_X_-_1  |
| Enox2     | 2.041  | 2.101  | 3.116  | 2.071  | 2.444  | 2.763  | 2.536  | 1.832  | 2.584  | 2.912  | 209224 | ENOX2    | NM_001271451_X_-_1  |
| Tnlp1     | -4.036 | 0.630  | -1.099 | -3.009 | 0.898  | 0.371  | 0.100  | -1.754 | 1.090  | 1.396  | 57783  | TNIP1    | NM_001271455_11_-_1 |
| Tnlp1     | 3.314  | 2.982  | 3.578  | 4.080  | 4.031  | 4.786  | 4.126  | 4.282  | 4.300  | 4.604  | 57783  | TNIP1    | NM_001271456_11_-_1 |
| Cd82      | 5.116  | 3.217  | 5.050  | 5.849  | 6.504  | 6.781  | 5.485  | 5.077  | 2.824  | 2.380  | 12521  | CD82     | NM_001271461_2_-_1  |
| Cd82      | 1.019  | 0.681  | 0.293  | 0.104  | 0.174  | 0.561  | 0.061  | 0.311  | -0.552 | -0.829 | 12521  | CD82     | NM_001271462_2_-_1  |
| Gfm2      | 1.181  | 1.998  | 1.994  | 1.019  | 1.698  | 0.894  | 0.821  | -1.259 | 0.987  | 1.393  | 320806 | GFM2     | NM_001271463_13_+_1 |
| Gfm2      | -0.559 | 0.251  | -0.360 | -2.576 | -1.717 | -1.043 | -0.121 | -4.737 | -0.182 | -1.700 | 320806 | GFM2     | NM_001271464_13_+_1 |
| Gfm2      | -4.340 | -1.132 | -4.569 | -4.737 | -4.828 | -2.029 | -3.829 | -4.841 | -4.411 | -4.655 | 320806 | GFM2     | NM_001271465_13_+_1 |
| Gabpb1    | 1.245  | -0.588 | -1.904 | 1.056  | -0.474 | -2.155 | -1.051 | -1.149 | -1.523 | 1.291  | 14391  | GABPB1   | NM_001271467_2_-_1  |
| Gabpb1    | 4.337  | 4.106  | 3.974  | 3.746  | 4.619  | 4.466  | 4.346  | 4.310  | 3.999  | 3.867  | 14391  | GABPB1   | NM_001271468_2_-_1  |
| Gabpb1    | -4.747 | -4.981 | -4.910 | -3.438 | -4.600 | -4.922 | -3.971 | -4.952 | -4.981 | -4.981 | 14391  | GABPB1   | NM_001271469_2_-_1  |
| Gabpb1    | 0.096  | 0.925  | 0.909  | -0.118 | 1.520  | 1.503  | 0.820  | 0.911  | 0.419  | -0.301 | 14391  | GABPB1   | NM_001271470_2_-_1  |
| Scube1    | -3.990 | -3.587 | -4.955 | -4.695 | -4.773 | -4.962 | -4.618 | -4.946 | -4.981 | -4.981 | 64706  | SCUBE1   | NM_001271472_15_-_1 |
| Scube1    | -0.420 | -0.324 | -4.920 | -4.594 | -4.939 | -2.983 | -3.071 | -4.732 | -4.981 | -4.981 | 64706  | SCUBE1   | NM_001271473_15_-_1 |
| Pglyrp2   | -2.617 | -4.763 | -4.372 | -1.251 | 3.344  | 3.936  | 1.683  | 0.344  | -4.978 | -4.942 | 57757  | PGLYRP2  | NM_001271476_17_-_1 |
| Pglyrp2   | -4.836 | -4.535 | -3.086 | -4.967 | -4.923 | -1.530 | -4.823 | -4.460 | -4.971 | -4.955 | 57757  | PGLYRP2  | NM_001271477_17_-_1 |
| Pglyrp2   | -1.805 | -4.202 | -2.825 | -1.485 | 2.282  | 3.119  | -1.388 | 0.530  | -4.922 | -4.851 | 57757  | PGLYRP2  | NM_001271478_17_-_1 |
| Pglyrp2   | -1.365 | -0.516 | -4.028 | -3.408 | -2.254 | -2.189 | -2.953 | -3.460 | -2.989 | -2.965 | 57757  | PGLYRP2  | NM_001271479_17_-_1 |
| Rtn3      | -0.997 | -3.907 | -2.160 | -1.934 | -0.182 | -0.473 | -0.331 | -1.473 | 0.292  | -0.414 | 20168  | RTN3     | NM_001271486_19_-_1 |
| Rtn3      | -4.104 | -3.819 | -2.565 | -0.475 | -0.650 | -2.407 | -1.589 | -1.382 | -4.356 | 0.322  | 20168  | RTN3     | NM_001271487_19_-_1 |
| Tfe3      | -3.964 | 0.416  | 1.686  | -1.041 | 1.502  | 1.422  | 2.074  | 1.067  | 4.003  | 3.769  | 209446 | TFE3     | NM_001271489_X_+_1  |
| Tfe3      | -4.645 | -0.828 | -0.130 | -1.038 | -0.074 | 1.403  | 0.124  | 0.151  | -0.186 | -0.811 | 209446 | TFE3     | NM_001271490_X_+_1  |
| Tfe3      | -1.007 | -2.002 | -1.369 | -2.735 | 0.425  | -2.619 | 0.263  | 0.784  | 2.029  | 0.255  | 209446 | TFE3     | NM_001271491_X_+_1  |
| Gabpb1    | -2.578 | -4.981 | -1.341 | -2.623 | -1.616 | -2.631 | -2.153 | -2.612 | -1.428 | -2.166 | 14391  | GABPB1   | NM_001271492_2_-_1  |
| Chka      | 2.734  | 2.701  | 4.580  | 4.382  | 6.057  | 5.765  | 5.249  | 3.971  | 3.034  | 2.924  | 12660  | CHKA     | NM_001271496_19_+_1 |
| Il15ra    | -3.754 | -0.023 | -0.387 | 0.618  | -0.587 | -0.501 | 0.200  | 0.324  | -0.948 | -2.128 | 16169  | IL15RA   | NM_001271497_2_+_1  |
| Il15ra    | -1.510 | -1.717 | 1.992  | 2.557  | 1.250  | 0.587  | 0.634  | 1.072  | 0.635  | 1.128  | 16169  | IL15RA   | NM_001271498_2_+_1  |
| Il15ra    | -4.485 | -4.464 | -0.484 | 0.506  | -4.718 | -3.516 | -0.400 | -3.330 | -1.073 | -1.892 | 16169  | IL15RA   | NM_001271499_2_+_1  |
| Il15ra    | -0.792 | -1.964 | 0.803  | 0.064  | -0.889 | -0.937 | -1.921 | -1.428 | 1.013  | 0.395  | 16169  | IL15RA   | NM_001271500_2_+_1  |
| Il15ra    | -2.074 | -1.931 | -1.196 | -2.975 | -2.017 | -2.379 | -1.659 | -4.606 | -0.754 | -1.394 | 16169  | IL15RA   | NM_001271501_2_+_1  |
| Crem      | -0.643 | -2.848 | -4.822 | -1.901 | -4.364 | -3.731 | -4.461 | -3.531 | -4.406 | -4.816 | 12916  | CREM     | NM_001271503_18_-_1 |
| Crem      | 0.614  | -1.808 | -0.948 | 0.153  | -1.124 | -3.176 | -2.450 | -1.741 | 0.603  | -0.691 | 12916  | CREM     | NM_001271504_18_-_1 |
| Crem      | -1.059 | 0.204  | -2.649 | -1.743 | -4.936 | -2.190 | -3.684 | -1.565 | -4.757 | -0.178 | 12916  | CREM     | NM_001271505_18_-_1 |
| Crem      | 0.186  | 0.225  | -2.707 | -3.638 | -4.874 | -4.292 | -3.351 | -4.895 | -4.751 | -0.878 | 12916  | CREM     | NM_001271506_18_-_1 |
| Lsp1      | -2.175 | -4.981 | -3.512 | -2.087 | -2.329 | -2.752 | -3.601 | -4.358 | -4.969 | -3.998 | 16985  | LSP1     | NM_001271508_7_+_1  |
| Lsp1      | 9.693  | 9.864  | 9.579  | 9.791  | 9.867  | 9.850  | 9.514  | 9.310  | 9.378  | 9.064  | 16985  | LSP1     | NM_001271509_7_+_1  |
| Lsp1      | 7.021  | 7.143  | 6.893  | 7.080  | 7.294  | 7.197  | 6.966  | 6.528  | 6.609  | 6.001  | 16985  | LSP1     | NM_001271510_7_+_1  |
| D17Wsu92e | 0.453  | 0.752  | 1.134  | 1.522  | 0.527  | -4.476 | 1.862  | 2.013  | 3.476  | 1.493  | 224647 | C6orf106 | NM_001271511_17_-_1 |
| Lsp1      | 1.295  | 1.731  | 1.810  | 1.631  | 1.727  | 1.171  | 1.286  | 0.437  | 1.106  | 0.164  | 16985  | LSP1     | NM_001271523_7_+_1  |
| Orc2      | 1.404  | 2.417  | 1.954  | 0.485  | 2.203  | 1.442  | 1.907  | 1.439  | 1.565  | 1.037  | 18393  | ORC2     | NM_001271526_1_-_1  |
| Insig2    | -3.742 | -3.047 | 0.979  | -1.439 | -1.749 | -4.889 | -2.483 | -4.425 | -2.951 | -4.239 | 72999  | INSIG2   | NM_001271531_1_-_1  |
| Insig2    | -4.667 | -4.676 | -1.708 | -1.283 | -4.915 | -4.932 | -2.365 | -4.802 | -0.441 | -4.940 | 72999  | INSIG2   | NM_001271532_1_-_1  |
| Myh14     | -4.458 | -3.039 | -4.881 | -4.824 | -4.972 | -4.979 | -4.976 | -4.973 | -4.981 | -4.981 | 71960  | MYH14    | NM_001271538_7_-_1  |
| Myh14     | -1.079 | -0.766 | -4.826 | -4.635 | -4.956 | -4.977 | -4.971 | -4.957 | -4.981 | -4.981 | 71960  | MYH14    | NM_001271540_7_-_1  |
| Cnot7     | 2.996  | 2.271  | 0.627  | -0.822 | 2.292  | 1.558  | 0.448  | -1.783 | 0.632  | 0.896  | 18983  | CNOT7    | NM_001271542_8_-_1  |
| Cnot7     | -1.327 | -0.143 | -0.282 | 1.064  | -0.800 | -0.896 | 0.421  | -1.611 | -0.127 | 0.173  | 18983  | CNOT7    | NM_001271543_8_-_1  |
| Slc4a9    | -4.981 | -4.981 | -4.614 | -4.835 | -4.981 | -4.981 | -4.981 | -4.981 | -4.981 | -4.981 | 240215 | SLC4A9   | NM_001271544_18_+_1 |
| Slc4a9    | -4.981 | -4.981 | -4.431 | -4.709 | -4.981 | -4.981 | -4.981 | -4.981 | -4.981 | -4.981 | 240215 | SLC4A9   | NM_001271545_18_+_1 |
| Slc4a9    | -4.981 | -4.981 | -4.272 | -4.603 | -4.981 | -4.981 | -4.981 | -4.981 | -4.981 | -4.981 | 240215 | SLC4A9   | NM_001271546_18_+_1 |
| Slc4a9    | -4.981 | -4.981 | -2.801 | -2.901 | -4.981 | -4.981 | -4.960 | -4.450 | -4.981 | -4.981 | 240215 | SLC4A9   | NM_001271547_18_+_1 |

|               |        |        |        |        |        |        |        |        |        |        |           |          |                    |
|---------------|--------|--------|--------|--------|--------|--------|--------|--------|--------|--------|-----------|----------|--------------------|
| Aire          | -4.899 | -4.981 | -1.775 | -4.790 | -0.498 | -1.260 | -2.933 | -4.290 | -4.981 | -4.981 | 11634     | AIRE     | NM_001271549_10_-1 |
| Aire          | -4.895 | -4.981 | -4.923 | -4.926 | -2.035 | -1.943 | -4.664 | -4.674 | -4.981 | -4.981 | 11634     | AIRE     | NM_001271550_10_-1 |
| Aire          | -4.893 | -4.981 | -2.125 | -2.644 | -4.510 | -2.755 | -4.598 | -4.535 | -4.981 | -4.981 | 11634     | AIRE     | NM_001271551_10_-1 |
| Aire          | -4.692 | -4.981 | -2.842 | -1.959 | -2.912 | -2.690 | -3.864 | -4.745 | -4.981 | -4.981 | 11634     | AIRE     | NM_001271552_10_-1 |
| Aire          | -4.684 | -4.981 | -3.028 | -3.301 | -2.670 | -4.717 | -4.922 | -4.813 | -4.981 | -4.981 | 11634     | AIRE     | NM_001271553_10_-1 |
| Aire          | -4.657 | -4.981 | -4.769 | -3.457 | -3.262 | -4.815 | -4.912 | -4.727 | -4.981 | -4.981 | 11634     | AIRE     | NM_001271554_10_-1 |
| Aire          | -4.644 | -4.981 | -4.683 | -4.811 | -2.947 | -4.765 | -4.910 | -4.564 | -4.981 | -4.981 | 11634     | AIRE     | NM_001271555_10_-1 |
| Aire          | -3.679 | -4.981 | -4.359 | -4.673 | -4.329 | -3.670 | -2.853 | -4.599 | -4.981 | -4.981 | 11634     | AIRE     | NM_001271556_10_-1 |
| Aire          | -3.604 | -4.981 | -4.446 | -4.690 | -4.268 | -4.840 | -4.545 | -4.485 | -4.981 | -4.981 | 11634     | AIRE     | NM_001271557_10_-1 |
| Aire          | -3.099 | -4.981 | -4.278 | -4.648 | -3.654 | -3.253 | -4.318 | -4.967 | -4.981 | -4.981 | 11634     | AIRE     | NM_001271558_10_-1 |
| Aire          | -2.998 | -4.981 | -4.085 | -4.650 | -3.480 | -4.715 | -3.904 | -4.971 | -4.981 | -4.981 | 11634     | AIRE     | NM_001271559_10_-1 |
| Armc3         | 2.139  | 2.333  | -1.785 | -3.007 | -1.334 | -2.091 | -0.406 | -2.071 | 1.264  | -0.323 | 70882     | ARMC3    | NM_001271563_2_+1  |
| Armc3         | 3.241  | 3.416  | -0.705 | -1.947 | -0.103 | -0.653 | 0.817  | -0.665 | 2.293  | 0.748  | 70882     | ARMC3    | NM_001271564_2_+1  |
| Armc3         | 2.254  | 1.771  | -2.345 | -3.285 | -0.503 | -1.569 | 0.545  | -0.702 | 0.817  | -0.535 | 70882     | ARMC3    | NM_001271565_2_+1  |
| Cdc7          | -4.281 | -0.327 | -2.498 | -0.644 | -0.376 | 0.048  | -1.661 | -0.462 | -1.268 | -4.783 | 12545     | CDC7     | NM_001271566_5_+1  |
| Cdc7          | 2.419  | 1.201  | 1.617  | 0.423  | 2.675  | 2.174  | 1.266  | 1.182  | 0.030  | -0.913 | 12545     | CDC7     | NM_001271567_5_+1  |
| Cdc7          | -0.493 | 0.130  | -2.000 | -2.612 | 0.580  | -0.805 | 0.623  | -0.923 | -4.481 | -4.634 | 12545     | CDC7     | NM_001271568_5_+1  |
| 1700065D16Rik | -4.981 | -4.981 | -3.591 | -4.027 | -3.820 | -4.876 | -4.491 | -3.987 | -4.394 | -4.981 | 73410     | NA       | NM_001271569_9_-1  |
| Sec1          | -1.395 | -4.981 | 0.305  | 0.325  | 2.599  | 3.335  | 0.301  | -0.647 | -4.190 | -4.981 | 56546     | NA       | NM_001271578_7_-1  |
| Phc1          | 2.479  | 1.800  | 0.254  | -0.505 | 3.815  | 3.242  | 0.801  | 0.918  | -1.595 | 0.277  | 13619     | PHC1     | NM_001271579_6_-1  |
| 4930426D05Rik | -1.709 | -4.981 | -4.850 | -2.825 | -4.322 | -1.515 | -2.132 | 0.381  | -4.981 | -3.882 | 74644     | NA       | NM_001271580_18_+1 |
| Smim10l1      | -1.429 | -0.365 | -1.257 | -0.934 | -0.941 | -1.337 | -0.775 | -2.071 | -2.941 | -1.558 | 381820    | SMIM10L1 | NM_001271582_6_+1  |
| Smim10l1      | -0.471 | -2.708 | -1.898 | -2.687 | -1.722 | -2.024 | -2.098 | -4.577 | -2.142 | -2.732 | 381820    | SMIM10L1 | NM_001271583_6_+1  |
| Dnajc5        | 3.763  | 4.234  | 4.115  | 3.837  | 4.064  | 3.624  | 3.656  | 3.578  | 5.017  | 4.285  | 13002     | DNAJC5   | NM_001271584_2_+1  |
| Dnajc5        | 0.429  | 1.616  | -0.823 | 2.350  | 0.142  | 0.651  | 0.066  | 2.199  | 2.991  | 2.462  | 13002     | DNAJC5   | NM_001271585_2_+1  |
| 4930451G09Rik | -1.004 | 0.410  | -2.889 | -1.686 | -1.169 | -0.097 | -3.135 | -1.454 | -4.394 | -1.629 | 74684     | NA       | NM_001271586_16_+1 |
| Eps8          | -3.619 | 1.260  | -0.653 | -2.297 | 0.114  | -1.871 | -0.892 | -3.325 | 0.853  | -4.464 | 13860     | EPS8     | NM_001271587_6_-1  |
| Eps8          | -1.602 | 4.280  | -3.565 | -0.037 | -0.420 | 0.441  | 0.478  | -1.846 | 1.839  | 1.524  | 13860     | EPS8     | NM_001271588_6_-1  |
| Eps8          | -0.593 | 5.004  | -1.149 | -0.556 | -3.598 | -1.522 | -1.628 | -1.234 | -4.438 | -2.316 | 13860     | EPS8     | NM_001271589_6_-1  |
| Rpl37rt       | -0.702 | -1.161 | 1.042  | 0.508  | 0.411  | -0.867 | 0.766  | -1.532 | -1.977 | -0.537 | 100502825 | NA       | NM_001271590_5_-1  |
| Rpl37rt       | 0.719  | 0.813  | 0.212  | -0.472 | -0.654 | -1.290 | 0.094  | -0.456 | 0.925  | -0.662 | 100502825 | NA       | NM_001271591_5_-1  |
| Eps8          | -3.663 | 2.275  | 4.701  | -2.781 | 5.367  | -1.211 | 5.359  | -3.321 | 5.801  | -4.472 | 13860     | EPS8     | NM_001271595_6_-1  |
| Sort1         | 4.378  | 3.810  | 2.964  | 3.785  | 3.561  | 3.987  | 3.262  | 2.240  | 4.867  | 5.492  | 20661     | SORT1    | NM_001271599_3_+1  |
| Ncaph2        | 3.415  | 3.666  | 3.352  | 2.563  | 2.485  | 2.158  | 2.494  | 2.158  | 1.834  | 1.789  | 52683     | NCAPH2   | NM_001271600_15_+1 |
| Ncaph2        | 4.200  | 4.356  | 4.549  | 4.865  | 3.939  | 4.029  | 4.014  | 3.994  | 4.043  | 3.360  | 52683     | NCAPH2   | NM_001271601_15_+1 |
| Socs1         | -0.748 | -0.762 | -0.567 | 0.711  | -0.115 | -0.750 | -2.260 | -2.562 | -0.726 | -2.024 | 12703     | SOCS1    | NM_001271603_16_-1 |
| Ackr3         | -2.339 | -4.826 | -4.980 | -4.964 | -4.952 | -3.665 | -4.722 | -3.417 | -4.949 | -4.981 | 12778     | ACKR3    | NM_001271607_1_+1  |
| Fen1          | 2.018  | 1.968  | 2.090  | 2.620  | 2.521  | 1.525  | 1.878  | 1.530  | 2.011  | 0.352  | 14156     | FEN1     | NM_001271614_19_-1 |
| Fen1          | 4.433  | 4.279  | 3.777  | 4.074  | 4.121  | 3.894  | 3.899  | 3.915  | 3.414  | 2.864  | 14156     | FEN1     | NM_001271615_19_-1 |
| Runx2         | -1.866 | -1.781 | -0.123 | -2.371 | 0.854  | 2.072  | 1.025  | -0.048 | -4.217 | -4.085 | 12393     | RUNX2    | NM_001271627_17_-1 |
| Runx2         | 6.719  | 6.606  | 2.027  | 1.757  | 0.970  | 2.205  | 2.867  | 2.208  | 2.988  | 3.023  | 12393     | RUNX2    | NM_001271630_17_-1 |
| Runx2         | -4.354 | -1.431 | -4.297 | -4.712 | -3.676 | -4.837 | -4.411 | -2.701 | -4.308 | -4.480 | 12393     | RUNX2    | NM_001271631_17_-1 |
| Ifi47         | -1.206 | -0.230 | -4.467 | -3.575 | -4.803 | -3.666 | -2.632 | -4.682 | -1.162 | -1.798 | 15953     | NA       | NM_001271676_11_+1 |
| Ifi47         | -1.679 | -1.550 | -1.836 | -3.990 | 0.677  | 0.081  | -0.232 | -0.492 | 2.681  | 2.036  | 15953     | NA       | NM_001271677_11_+1 |
| Wnk3          | -3.337 | -4.981 | -4.968 | -4.968 | -4.978 | -4.899 | -4.981 | -4.976 | -4.727 | -4.981 | 279561    | WNK3     | NM_001271678_X_+1  |
| Wnk3          | -1.092 | -4.981 | -4.948 | -4.948 | -4.984 | -4.506 | -4.979 | -4.954 | -4.496 | -4.981 | 279561    | WNK3     | NM_001271679_X_+1  |
| Pgf           | 0.108  | 1.101  | -0.653 | -0.842 | -2.598 | -0.870 | -2.202 | -0.060 | -3.242 | -0.701 | 18654     | PGF      | NM_001271705_12_-1 |
| Lrrn3         | -4.404 | -4.610 | -3.964 | -4.761 | -4.604 | -4.854 | -4.555 | -4.229 | -3.481 | -4.623 | 16981     | LRRN3    | NM_001271708_12_-1 |
| Lrrn3         | -4.113 | -4.544 | -2.998 | -4.548 | -3.880 | -3.922 | -3.316 | -2.104 | -1.348 | -4.459 | 16981     | LRRN3    | NM_001271709_12_-1 |
| Surf1         | -0.257 | 0.401  | -1.746 | -3.251 | -2.324 | -3.092 | -1.132 | -2.846 | -1.822 | -1.532 | 20930     | SURF1    | NM_001271724_2_-1  |
| Trim2         | -3.871 | -4.981 | -1.286 | -2.702 | -4.869 | -2.611 | -4.174 | -3.131 | -2.114 | -4.981 | 80890     | TRIM2    | NM_001271725_3_-1  |
| Trim2         | -4.034 | -4.981 | -3.572 | -3.787 | -4.895 | -3.696 | -4.317 | -4.350 | -3.113 | -4.981 | 80890     | TRIM2    | NM_001271726_3_-1  |
| Trim2         | -4.625 | -4.981 | -0.510 | -0.161 | 1.500  | 1.856  | -0.555 | -1.234 | -3.895 | -4.342 | 80890     | TRIM2    | NM_001271727_3_-1  |
| Trim2         | -4.263 | -4.981 | -4.096 | -4.587 | -4.029 | -4.716 | -4.484 | -4.829 | -3.962 | -4.981 | 80890     | TRIM2    | NM_001271728_3_-1  |
| Tk1           | -4.264 | -1.132 | -1.071 | -0.539 | 1.962  | -1.011 | -0.504 | -1.072 | -4.400 | -4.819 | 21877     | TK1      | NM_001271729_11_-1 |
| Xbp1          | 6.601  | 6.980  | 6.391  | 6.013  | 4.849  | 4.717  | 6.220  | 6.210  | 7.511  | 6.931  | 22433     | XBP1     | NM_001271730_11_+1 |
| Dnmt3b        | -3.937 | -4.835 | -4.106 | -4.809 | -4.786 | -4.865 | -4.138 | -4.328 | -4.654 | -4.953 | 13436     | DNMT3B   | NM_001271744_2_+1  |
| Dnmt3b        | -2.576 | -4.715 | -2.198 | -4.776 | -4.713 | -0.408 | -1.050 | -1.797 | -3.202 | -4.706 | 13436     | DNMT3B   | NM_001271745_2_+1  |
| Dnmt3b        | -2.509 | -2.586 | -3.775 | -3.546 | -4.538 | -4.803 | -4.665 | -4.570 | -0.398 | -4.763 | 13436     | DNMT3B   | NM_001271746_2_+1  |
| Dnmt3b        | 1.560  | -0.117 | 0.655  | -1.331 | 0.418  | -1.569 | 0.176  | -0.255 | 1.043  | 0.548  | 13436     | DNMT3B   | NM_001271747_2_+1  |
| Dnmt3a        | 4.273  | 3.650  | 4.878  | 5.020  | 5.735  | 5.975  | 4.566  | 4.317  | 2.060  | 2.345  | 13435     | DNMT3A   | NM_001271753_12_+1 |
| Wnt5b         | -4.981 | -4.981 | -4.611 | -4.679 | -4.981 | -4.981 | -4.399 | -4.923 | -4.753 | -4.764 | 22419     | WNT5B    | NM_001271757_6_-1  |
| Wnt5b         | -4.981 | -4.981 | -3.456 | -2.696 | -4.970 | -4.970 | -1.948 | -3.314 | -2.639 | -3.273 | 22419     | WNT5B    | NM_001271758_6_-1  |
| Adra1a        | -4.981 | -4.981 | -4.981 | -4.981 | -4.949 | -4.508 | -4.943 | -4.962 | -4.981 | -4.342 | 11549     | ADRA1A   | NM_001271760_14_+1 |
| Tpm3          | 6.262  | 5.534  | 6.966  | 6.642  | 7.335  | 6.764  | 7.001  | 6.277  | 7.160  | 6.163  | 59069     | TPM3     | NM_001271764_3_+1  |
| Gpr35         | 1.901  | 1.969  | 3.308  | 3.771  | 3.241  | 3.943  | 3.042  | 0.544  | 1.569  | 1.900  | 64095     | GPR35    | NM_001271766_1_+1  |
| Bhlhe41       | -4.280 | -4.981 | -4.948 | -4.453 | -4.937 | -4.901 | -4.551 | -1.533 | -4.394 | -3.751 | 79362     | NA       | NM_001271768_6_-1  |
| Skil          | -2.379 | 0.357  | -4.318 | -2.241 | -3.742 | -3.385 | -1.160 | -1.420 | -1.382 | -1.879 | 20482     | SKIL     | NM_001271772_3_+1  |
| C8g           | -2.942 | -4.981 | -0.542 | -2.696 | -0.716 | -1.423 | -1.879 | -2.042 | 0.308  | -0.125 | 69379     | C8G      | NM_001271777_2_-1  |
| Rchy1         | 4.639  | 4.380  | 2.466  | 1.905  | 2.239  | 1.473  | 1.766  | 1.583  | 2.929  | 2.526  | 68098     | RCHY1    | NM_001271797_5_-1  |
| Agpr          | -4.944 | -4.981 | -2.907 | -4.963 | -4.974 | -4.981 | -4.888 | -4.971 | -4.981 | -4.976 | 11604     | AGRP     | NM_001271806_8_-1  |
| Aqp9          | -4.802 | -4.981 | -2.572 | -4.836 | -2.915 | -4.777 | -3.123 | -3.439 | -4.569 | -4.930 | 64008     | AQP9     | NM_001271843_9_-1  |
| Add2          | -4.981 | -3.683 | -4.810 | -4.429 | -4.729 | -4.951 | -4.954 | -4.746 | -4.879 | -4.372 | 11519     | ADD2     | NM_001271857_6_+1  |
| Add2          | -4.981 | -3.669 | -4.809 | -4.422 | -4.726 | -4.951 | -4.953 | -4.741 | -4.879 | -4.363 | 11519     | ADD2     | NM_001271858_6_+1  |

|          |        |        |        |        |        |        |        |        |        |        |        |         |                      |
|----------|--------|--------|--------|--------|--------|--------|--------|--------|--------|--------|--------|---------|----------------------|
| Add2     | -4.981 | -2.127 | -4.289 | -0.978 | -3.249 | -3.038 | -4.562 | -1.476 | -4.687 | -2.232 | 11519  | ADD2    | NM_001271859_6_+_1   |
| Add2     | -4.981 | -4.981 | -4.959 | -4.797 | -4.902 | -4.960 | -4.974 | -4.946 | -4.953 | -4.736 | 11519  | ADD2    | NM_001271860_6_+_1   |
| Add2     | -4.981 | -4.981 | -4.523 | 0.808  | -2.306 | 1.052  | -2.178 | 1.113  | -0.830 | -0.494 | 11519  | ADD2    | NM_001271861_6_+_1   |
| Ano10    | -4.167 | -4.393 | -2.261 | -2.605 | -4.627 | -2.345 | -3.838 | -4.756 | -0.816 | -2.329 | 102566 | ANO10   | NM_001271873_9_-_1   |
| Ano7     | -4.981 | -4.981 | -3.178 | -4.920 | -3.907 | -2.883 | -3.564 | -3.279 | -4.945 | -4.464 | 404545 | ANO7    | NM_001271884_1_+_1   |
| Acox1    | -0.804 | 0.462  | 2.258  | 1.838  | 2.418  | 2.026  | 2.938  | 1.870  | 3.589  | 2.723  | 11430  | ACOX1   | NM_001271898_11_-_1  |
| B3gnt9   | -0.507 | -4.006 | -4.952 | -4.965 | -4.896 | -4.964 | -4.858 | -4.944 | -4.641 | -2.832 | 97440  | B3GNT9  | NM_001271915_8_-_1   |
| Eya2     | -4.981 | -3.267 | -3.730 | -2.738 | -4.730 | -3.701 | -3.625 | -4.495 | -1.911 | -4.981 | 14049  | EYA2    | NM_001271962_2_+_1   |
| Eya2     | -4.981 | -4.668 | -4.918 | -4.911 | -4.974 | -4.974 | -4.767 | -4.948 | -4.691 | -4.981 | 14049  | EYA2    | NM_001271963_2_+_1   |
| Fut1     | -4.981 | -4.981 | -3.168 | -3.122 | -4.973 | -4.973 | -3.515 | -3.283 | -4.981 | -4.981 | 14343  | FUT1    | NM_001271981_7_+_1   |
| Fut2     | -4.981 | -4.981 | -4.915 | -4.915 | -4.938 | -4.937 | -4.722 | -4.852 | -4.981 | -4.981 | 14344  | FUT2    | NM_001271993_7_-_1   |
| Sema6c   | -4.887 | -4.827 | -4.981 | -4.981 | -4.981 | -4.981 | -4.979 | -4.981 | -4.960 | -4.973 | 20360  | SEMA6C  | NM_001272024_3_+_1   |
| Arvcf    | -4.387 | -4.234 | -4.744 | -4.827 | -3.947 | -4.965 | -4.595 | -4.917 | -4.842 | -4.944 | 11877  | ARVCF   | NM_001272028_16_+_1  |
| Arvcf    | -4.528 | -4.493 | -1.040 | -1.090 | -4.714 | -2.972 | -4.603 | -3.636 | -4.717 | -4.919 | 11877  | ARVCF   | NM_001272029_16_+_1  |
| Arvcf    | -4.212 | -4.185 | -4.595 | -4.702 | -3.291 | -4.954 | -4.556 | -4.919 | -4.550 | -4.825 | 11877  | ARVCF   | NM_001272030_16_+_1  |
| Arvcf    | -1.753 | -1.132 | -4.081 | -3.202 | -2.210 | -3.162 | -2.352 | -3.954 | -1.948 | -4.668 | 11877  | ARVCF   | NM_001272031_16_+_1  |
| Arvcf    | -0.027 | -0.332 | -2.029 | -1.192 | -0.195 | -0.849 | -0.578 | -0.224 | 1.224  | 1.605  | 11877  | ARVCF   | NM_001272032_16_+_1  |
| AA414768 | 1.592  | 1.938  | -1.233 | -2.234 | -2.136 | -1.488 | -0.170 | 0.404  | 2.304  | 2.306  | 245350 | NA      | NM_001272033_X_+_1   |
| Slc33a1  | -0.590 | -4.981 | -0.220 | -1.948 | -2.444 | -2.240 | -3.615 | -2.197 | -1.050 | -1.549 | 11416  | SLC33A1 | NM_001272035_3_-_1   |
| Acta1    | -4.981 | -4.981 | -4.965 | -4.940 | -4.922 | -4.977 | -4.971 | -4.975 | -4.866 | -4.914 | 11459  | ACTA1   | NM_001272041_8_-_1   |
| Ada      | 1.846  | 1.838  | -0.305 | -0.510 | 1.225  | 0.067  | 1.235  | 0.466  | -0.004 | 0.703  | 11486  | ADA     | NM_001272052_2_-_1   |
| Numb     | -4.254 | -3.866 | -1.618 | -0.180 | -2.059 | -0.787 | -2.437 | -1.289 | 1.290  | 0.746  | 18222  | NUMB    | NM_001272055_12_-_1  |
| Numb     | 2.242  | 0.967  | 3.401  | 2.250  | 0.078  | 0.593  | 2.382  | 2.259  | 3.918  | 4.330  | 18222  | NUMB    | NM_001272056_12_-_1  |
| Trim24   | 3.903  | 3.293  | 2.478  | 1.556  | 3.038  | 2.439  | 2.388  | 1.518  | 2.475  | 1.863  | 21848  | TRIM24  | NM_001272064_6_+_1   |
| Abhd10   | 2.704  | 2.003  | 2.936  | 2.354  | 2.436  | 1.950  | 2.251  | 1.941  | 2.449  | 1.641  | 213012 | ABHD10  | NM_001272070_16_-_1  |
| Trim24   | 4.052  | 4.585  | 1.790  | 2.404  | 2.138  | 2.718  | 2.790  | 2.311  | 2.029  | 1.812  | 21848  | TRIM24  | NM_001272076_6_+_1   |
| Trem2    | -4.981 | -4.981 | -4.874 | -4.824 | -4.981 | -4.981 | -2.496 | 0.722  | 2.578  | 3.155  | 83433  | TREM2   | NM_001272078_17_+_1  |
| Tysnd1   | -4.763 | -0.802 | -0.872 | -1.546 | -1.132 | 0.048  | -1.755 | -1.231 | -0.343 | 1.187  | 71767  | TYSND1  | NM_001272090_10_+_1  |
| Tysnd1   | -2.160 | -4.858 | -1.241 | -3.079 | -0.797 | -2.480 | -1.361 | -1.250 | 0.889  | -0.138 | 71767  | TYSND1  | NM_001272091_10_+_1  |
| Tysnd1   | -2.406 | -4.981 | -4.859 | -4.970 | -4.972 | -3.741 | -4.779 | -4.233 | -1.008 | -1.179 | 71767  | TYSND1  | NM_001272092_10_+_1  |
| Fabp5    | -4.981 | -4.981 | -4.914 | -3.547 | -2.447 | -4.151 | -2.670 | -4.065 | -2.682 | -4.981 | 16592  | FABP5   | NM_001272097_3_+_1   |
| Fabp5    | -4.981 | -4.981 | -3.308 | -2.471 | -0.835 | -2.046 | 1.033  | -1.013 | -1.093 | -0.292 | 16592  | FABP5   | NM_001272098_3_+_1   |
| Cp       | -4.981 | -4.981 | -1.180 | -0.354 | -1.952 | -1.729 | -1.341 | -1.492 | -1.096 | -0.077 | 12870  | CP      | NM_0012726248_3_+_1  |
| Cp       | -1.630 | -1.595 | 0.504  | 0.295  | -0.965 | -0.785 | 0.358  | -0.648 | -2.234 | -0.636 | 12870  | CP      | NM_0012726250_3_+_1  |
| Hpn      | -0.057 | -4.981 | -2.299 | -0.448 | -2.777 | -1.008 | -1.740 | 0.361  | -0.633 | -1.236 | 15451  | HPN     | NM_0012726269_7_-_1  |
| Cyld     | 3.056  | 2.983  | 3.371  | 2.216  | 3.400  | 2.577  | 3.267  | 0.642  | 2.216  | 0.249  | 74256  | CYLD    | NM_0012726279_8_+_1  |
| Aip      | 7.043  | 7.045  | 6.748  | 6.792  | 7.262  | 7.110  | 7.142  | 7.098  | 7.275  | 6.815  | 11632  | AIP     | NM_0012726284_19_-_1 |
| Eno3     | -1.127 | -0.974 | -0.487 | 1.546  | 1.131  | 2.961  | 2.368  | 2.026  | 1.353  | -0.222 | 13808  | ENO3    | NM_0012726285_11_+_1 |
| Brat1    | 1.106  | 1.216  | 2.353  | 1.855  | 2.192  | 1.627  | 2.222  | 1.981  | 3.387  | 3.291  | 231841 | BRAT1   | NM_0012726287_5_+_1  |
| Aes      | 3.926  | 3.939  | 3.493  | 3.677  | 3.802  | 3.562  | 3.524  | 3.362  | 3.567  | 3.327  | 14797  | AES     | NM_0012726288_10_+_1 |
| Wwp1     | -4.981 | -1.926 | -1.570 | -3.525 | -3.933 | -1.845 | -2.037 | -2.554 | -4.743 | -4.896 | 107568 | WWP1    | NM_0012726292_4_-_1  |
| Ednrb    | -2.335 | -4.981 | -4.335 | -2.145 | -4.329 | -4.719 | -2.999 | -3.822 | -0.204 | 1.351  | 13618  | EDNRB   | NM_0012726296_14_-_1 |
| Avpr2    | -3.448 | -4.981 | -4.438 | -4.809 | -4.180 | -4.551 | -2.461 | -4.013 | -2.843 | -1.233 | 12000  | AVPR2   | NM_0012726298_X_+_1  |
| Avpr2    | -4.981 | -4.981 | -3.378 | -4.115 | -3.666 | -3.475 | -3.011 | -3.091 | -2.046 | -4.972 | 12000  | AVPR2   | NM_0012726299_X_+_1  |
| Ampd3    | 3.715  | 4.096  | 5.118  | 5.115  | 5.362  | 5.138  | 4.592  | 4.991  | 6.989  | 6.712  | 11717  | AMPD3   | NM_0012726301_7_+_1  |
| Cdkl2    | -4.981 | -4.299 | -4.157 | -3.001 | -3.713 | -1.691 | -4.885 | -3.808 | -4.632 | -2.649 | 53886  | CDKL2   | NM_0012726315_5_-_1  |
| Uba1     | 0.161  | -0.193 | -3.435 | -0.749 | -2.240 | -1.449 | -2.467 | 0.504  | 1.382  | 0.457  | 22201  | UBA1    | NM_0012726316_X_+_1  |
| Uba1     | 0.484  | 1.122  | -2.096 | -0.501 | 0.164  | -0.808 | 0.328  | 0.250  | -2.889 | 0.908  | 22201  | UBA1    | NM_0012726317_X_+_1  |
| Cyhr1    | 3.873  | 3.644  | 3.515  | 3.548  | 3.165  | 3.076  | 3.727  | 3.490  | 4.682  | 4.131  | 54151  | CYHR1   | NM_0012726321_15_-_1 |
| Cyhr1    | 2.685  | 1.455  | -1.181 | -3.289 | -1.396 | -0.735 | -1.023 | -2.172 | -1.476 | -1.444 | 54151  | CYHR1   | NM_0012726322_15_-_1 |
| Ms4a2    | -4.981 | -4.981 | -4.975 | -4.893 | -3.815 | -3.580 | -1.384 | -4.098 | -4.981 | -4.981 | 14126  | MS4A2   | NM_0012726328_19_-_1 |
| Ms4a2    | -4.981 | -4.981 | -4.940 | -3.874 | -4.720 | -3.760 | -2.242 | -4.325 | -4.981 | -4.981 | 14126  | MS4A2   | NM_0012726329_19_-_1 |
| Ms4a2    | -4.981 | -4.981 | -4.976 | -4.907 | -4.275 | -4.937 | 0.012  | -3.883 | -4.981 | -4.981 | 14126  | MS4A2   | NM_0012726330_19_-_1 |
| Zbtb34   | 2.221  | 1.834  | 2.091  | 2.472  | 2.334  | 1.633  | 2.693  | 3.298  | 4.034  | 3.987  | 241311 | ZBTB34  | NM_0012726332_2_-_1  |
| Cyhr1    | 3.943  | 3.656  | 3.011  | 2.606  | 3.089  | 3.075  | 2.855  | 2.616  | 2.865  | 2.385  | 54151  | CYHR1   | NM_0012726333_15_-_1 |
| Cyhr1    | -4.058 | -3.803 | -2.839 | -4.741 | -0.843 | -1.997 | -4.417 | -3.106 | -1.137 | -4.705 | 54151  | CYHR1   | NM_0012726334_15_-_1 |
| Cyhr1    | 1.308  | 1.210  | 0.903  | -0.236 | 0.550  | -0.493 | 0.818  | -1.873 | 0.737  | 0.236  | 54151  | CYHR1   | NM_0012726335_15_-_1 |
| Dnm1l    | 2.871  | 3.710  | 3.186  | 3.910  | 3.591  | 4.000  | 3.373  | 3.476  | 2.171  | 3.456  | 74006  | DNM1L   | NM_0012726340_16_-_1 |
| Dnm1l    | 1.342  | -0.489 | 2.043  | 1.353  | -0.004 | 0.140  | 0.716  | 0.549  | 2.113  | 1.879  | 74006  | DNM1L   | NM_0012726341_16_-_1 |
| Epc1     | 4.735  | 4.508  | 2.603  | 2.668  | 3.200  | 3.512  | 3.378  | 3.058  | 2.792  | 2.482  | 13831  | EPC1    | NM_0012726350_18_-_1 |
| Grin3a   | -4.981 | -3.879 | -4.573 | -4.908 | -4.840 | -4.846 | -4.980 | -4.642 | -4.981 | -4.981 | 242443 | GRIN3A  | NM_0012726355_4_-_1  |
| Setmar   | 0.518  | -4.809 | -2.110 | -1.837 | -4.938 | -2.298 | -3.407 | -2.669 | -1.804 | -0.543 | 74729  | NA      | NM_0012726356_6_+_1  |
| Kcnp12   | -2.075 | -4.981 | -4.978 | -4.970 | -3.097 | -4.644 | -3.126 | -3.400 | -2.250 | -2.391 | 80906  | KCNIP2  | NM_0012726358_19_-_1 |
| Camsap1  | 1.637  | 2.372  | 3.474  | 3.232  | 3.158  | 2.995  | 2.701  | 2.632  | 2.464  | 2.865  | 227634 | CAMSAP1 | NM_0012726359_2_-_1  |
| Camsap1  | 0.545  | 0.571  | -1.598 | -1.311 | -1.316 | -1.156 | -0.184 | -1.661 | -0.139 | -0.718 | 227634 | CAMSAP1 | NM_0012726360_2_-_1  |
| Camsap1  | -0.281 | -0.265 | -2.279 | -2.207 | -2.268 | -2.254 | -1.116 | -2.457 | -0.960 | -1.553 | 227634 | CAMSAP1 | NM_0012726361_2_-_1  |
| Whrn     | -0.605 | 0.383  | -2.568 | -4.814 | -0.243 | -0.732 | -2.432 | -1.203 | -3.109 | -1.716 | 73750  | WHRN    | NM_0012726371_4_-_1  |
| Spns2    | -0.303 | -2.542 | -0.807 | -0.397 | 0.060  | -0.777 | 0.161  | -0.531 | -0.156 | -0.194 | 216892 | SPNS2   | NM_0012726383_11_-_1 |
| Ube2d2b  | -2.362 | -1.255 | -4.950 | -4.843 | -4.247 | -4.880 | -4.169 | -4.574 | -4.394 | -1.639 | 73318  | UBE2D4  | NM_0012726397_5_+_1  |
| Ms4a7    | -4.981 | -4.842 | -4.981 | -4.981 | -4.605 | -4.810 | -3.378 | -4.115 | -4.981 | -3.335 | 109225 | MS4A7   | NM_0012726398_19_-_1 |
| Ippk     | -4.798 | -4.438 | -4.386 | -3.704 | -3.657 | -3.768 | -1.792 | -3.723 | -1.277 | -1.777 | 75678  | IPPK    | NM_0012726399_13_+_1 |
| Lef1     | -2.128 | -2.679 | -4.957 | -2.694 | -4.655 | -4.219 | -2.099 | -1.663 | -4.957 | -3.892 | 16842  | LEF1    | NM_0012726402_3_+_1  |
| Lef1     | -1.894 | -1.064 | -3.016 | -0.718 | -2.486 | -0.083 | -1.054 | 2.549  | -0.628 | -0.514 | 16842  | LEF1    | NM_0012726403_3_+_1  |
| Nup88    | 4.398  | 4.126  | 4.921  | 4.886  | 5.027  | 4.637  | 4.371  | 3.957  | 4.314  | 3.860  | 19069  | NUP88   | NM_0012726406_11_-_1 |

|                |        |        |        |        |        |        |        |        |        |        |                 |            |                    |
|----------------|--------|--------|--------|--------|--------|--------|--------|--------|--------|--------|-----------------|------------|--------------------|
| Fn1            | -4.789 | -4.981 | -4.808 | -4.780 | -4.941 | -4.853 | -2.521 | -2.241 | 6.378  | 6.610  | 14268           | FN1        | NM_001276408_1_-1  |
| Fn1            | -4.758 | -4.981 | -4.779 | -1.519 | -4.945 | -1.659 | -2.705 | -1.582 | 6.842  | 7.132  | 14268           | FN1        | NM_001276409_1_-1  |
| Fn1            | -4.644 | -4.981 | -3.111 | -1.608 | -3.138 | -0.586 | -0.196 | 3.541  | 10.012 | 10.260 | 14268           | FN1        | NM_001276410_1_-1  |
| Fn1            | -4.561 | -4.981 | -1.458 | -3.278 | -2.818 | -0.639 | 0.835  | 3.753  | 10.513 | 10.786 | 14268           | FN1        | NM_001276411_1_-1  |
| Fn1            | -4.542 | -4.981 | -4.567 | -3.109 | -4.882 | -2.589 | -3.191 | -3.768 | 3.916  | 4.647  | 14268           | FN1        | NM_001276412_1_-1  |
| Fn1            | -3.724 | -4.981 | -2.850 | -2.114 | -4.640 | -1.161 | 0.544  | 3.029  | 7.642  | 8.372  | 14268           | FN1        | NM_001276413_1_-1  |
| Cass4          | -0.967 | -0.170 | -1.584 | -1.656 | 2.069  | 2.700  | 1.563  | 0.432  | 0.110  | 1.674  | 320664          | CASS4      | NM_001276422_2_+1  |
| Cass4          | -0.590 | 0.228  | -1.147 | -2.740 | 3.476  | 3.240  | 1.798  | 0.423  | 2.533  | -0.726 | 320664          | CASS4      | NM_001276423_2_+1  |
| St6galnac4     | 5.711  | 5.416  | 5.252  | 5.655  | 4.979  | 4.809  | 4.875  | 5.330  | 4.909  | 4.785  | 20448           | ST6GALNAC4 | NM_001276425_2_+1  |
| Acyl1          | 3.200  | 3.533  | -2.603 | -1.741 | -2.190 | -0.235 | -1.429 | 0.565  | -1.843 | -2.251 | 109652          | ACY1       | NM_001276442_9_-1  |
| Gpr155         | 0.879  | -0.090 | -0.830 | -1.885 | -0.381 | -1.094 | 0.270  | -2.214 | 1.544  | -0.668 | 68526           | GPR155     | NM_001276443_2_-1  |
| Gpr155         | -3.676 | 0.074  | -0.197 | -1.070 | -2.190 | -4.347 | -3.494 | -3.293 | -4.354 | -4.430 | 68526           | GPR155     | NM_001276444_2_-1  |
| Tlr1           | -4.619 | -4.384 | 2.776  | 3.720  | 5.170  | 5.147  | 4.687  | 5.094  | 3.276  | 4.651  | 21897           | TLR1       | NM_001276445_5_-1  |
| Alad           | 2.077  | 0.250  | 1.180  | 3.036  | 1.036  | 2.837  | 0.693  | 4.060  | 0.907  | 1.281  | 17025           | ALAD       | NM_001276446_4_-1  |
| Slc17a5        | -0.368 | -4.014 | -4.371 | -4.776 | -4.793 | -4.199 | -2.678 | -4.824 | -4.497 | -4.713 | 235504          | SLC17A5    | NM_001276452_9_-1  |
| Slc19a2        | 1.231  | 0.321  | 0.791  | 1.152  | 1.095  | 0.687  | 0.014  | 1.390  | 1.805  | 1.820  | 116914          | SLC19A2    | NM_001276455_1_+1  |
| Asap1          | -2.016 | -3.948 | 4.130  | 4.224  | 4.926  | 4.921  | 4.631  | 4.230  | 5.339  | 5.206  | 13196           | ASAP1      | NM_001276461_15_-1 |
| Asap1          | -1.074 | 0.535  | 3.536  | 3.219  | 2.091  | 1.734  | 2.930  | 3.475  | 2.628  | 2.932  | 13196           | ASAP1      | NM_001276462_15_-1 |
| Asap1          | 2.692  | 2.015  | 6.950  | 6.859  | 7.160  | 6.962  | 7.214  | 6.755  | 7.866  | 7.590  | 13196           | ASAP1      | NM_001276463_15_-1 |
| Vps13d         | 3.801  | 3.550  | 3.222  | 2.631  | 3.735  | 3.805  | 3.768  | 3.052  | 3.506  | 3.029  | 230895          | VPS13D     | NM_001276465_4_-1  |
| Cited1         | -4.913 | -4.981 | -3.795 | -4.862 | -4.963 | -4.026 | -4.772 | -4.975 | -4.981 | -4.981 | 12705           | CITED1     | NM_001276466_X_-1  |
| Asap1          | -2.384 | -3.970 | 1.446  | -0.054 | 2.464  | 2.034  | 2.170  | -0.650 | 0.127  | -0.126 | 13196           | ASAP1      | NM_001276467_15_-1 |
| Cited1         | -3.668 | -4.981 | -4.583 | -4.585 | -3.561 | -4.343 | -4.964 | -4.552 | -4.981 | -4.981 | 12705           | CITED1     | NM_001276473_X_-1  |
| Cited1         | -4.981 | -4.981 | -4.981 | -4.981 | -4.981 | -4.981 | -4.981 | -4.981 | -4.981 | -4.981 | 12705           | CITED1     | NM_001276474_X_-1  |
| Dag1           | -3.524 | -0.461 | -3.792 | -4.236 | -0.839 | -2.214 | -3.586 | -1.854 | -0.712 | -4.311 | 13138           | DAG1       | NM_001276481_9_-1  |
| Dag1           | 2.947  | 3.567  | 2.110  | 0.945  | -0.203 | 0.200  | -0.077 | 0.323  | 2.848  | 3.702  | 13138           | DAG1       | NM_001276482_9_-1  |
| Dag1           | 0.892  | -0.694 | -1.204 | -0.540 | 0.669  | -2.960 | -2.125 | 0.504  | -0.416 | -0.618 | 13138           | DAG1       | NM_001276485_9_-1  |
| Dag1           | 3.439  | 3.429  | -0.428 | 1.206  | 0.647  | 1.717  | 1.841  | 2.192  | 1.991  | 2.379  | 13138           | DAG1       | NM_001276486_9_-1  |
| Dag1           | -3.954 | -3.448 | -4.351 | -4.552 | -4.724 | -4.910 | -4.357 | -4.770 | -4.256 | -4.568 | 13138           | DAG1       | NM_001276492_9_-1  |
| Dag1           | 1.652  | -0.113 | -0.362 | -0.653 | -2.088 | -1.881 | 0.403  | 0.213  | -1.346 | 1.249  | 13138           | DAG1       | NM_001276493_9_-1  |
| Record_removed | 0.930  | -2.204 | -3.307 | -2.601 | -2.780 | -4.356 | -3.184 | -3.109 | -3.708 | -4.059 | Record_removeNA |            | NM_001276494_9_-1  |
| Vps13d         | 0.559  | 2.348  | 0.881  | 2.419  | 2.121  | 3.553  | 1.176  | 1.959  | 0.646  | 1.591  | 230895          | VPS13D     | NM_001276502_4_-1  |
| Arc            | -2.417 | -2.566 | 2.498  | 2.393  | -0.856 | -1.405 | -1.212 | -2.287 | -2.830 | -3.816 | 11838           | ARC        | NM_001276684_15_-1 |
| Nxf1           | 5.827  | 5.819  | 5.660  | 5.850  | 5.776  | 6.243  | 5.158  | 5.797  | 5.724  | 5.940  | 53319           | NXF1       | NM_001276704_19_+1 |
| Ackr2          | -4.206 | -4.981 | -4.669 | -4.647 | -4.969 | -4.919 | -4.614 | -4.756 | -4.981 | -4.559 | 59289           | ACKR2      | NM_001276719_9_+1  |
| Brsk2          | -4.217 | -4.740 | -4.637 | -4.874 | -4.978 | -4.980 | -4.646 | -4.852 | -4.848 | -4.373 | 75770           | BRSK2      | NM_001276763_7_+1  |
| Dst            | 2.717  | 2.840  | -2.210 | 0.641  | 1.692  | 2.239  | 1.031  | 2.170  | -2.725 | -1.032 | 13518           | NA         | NM_001276764_1_+1  |
| Zc3h11a        | 5.537  | 5.679  | 5.588  | 5.727  | 5.903  | 6.017  | 5.590  | 5.652  | 5.156  | 5.566  | 70579           | ZC3H11A    | NM_001276767_1_-1  |
| Fer1l5         | -1.243 | -1.494 | -3.194 | -4.079 | -1.902 | -2.702 | -2.188 | -2.351 | 0.131  | 0.068  | 100534273       | FER1L5     | NM_001277076_1_+1  |
| Gas7           | -4.521 | -4.155 | -3.434 | -2.110 | -4.103 | -4.945 | -1.834 | 0.460  | -3.514 | -0.179 | 14457           | GAS7       | NM_001277079_11_+1 |
| Gas7           | 0.507  | -1.681 | -2.449 | -3.934 | -4.175 | -3.445 | -2.503 | -2.559 | 0.460  | -0.391 | 14457           | GAS7       | NM_001277080_11_+1 |
| Nfyc           | -1.856 | 0.342  | -2.032 | -0.678 | -0.823 | -2.453 | -1.420 | -2.856 | 0.163  | -2.120 | 18046           | NFYC       | NM_001277095_4_-1  |
| Pkig           | 1.592  | 1.959  | -1.549 | -1.751 | -3.310 | -3.745 | -2.187 | -1.885 | -1.486 | -2.273 | 18769           | PKIG       | NM_001277096_2_+1  |
| Add3           | -0.494 | -2.698 | 1.215  | -3.702 | 0.443  | -2.507 | 2.355  | 0.863  | 3.246  | 1.387  | 27360           | ADD3       | NM_001277100_19_+1 |
| Cops5          | 1.898  | 2.366  | 2.018  | 0.672  | 0.750  | -0.589 | 0.416  | 0.685  | 0.887  | 0.127  | 26754           | COPS5      | NM_001277101_1_-1  |
| Crif3          | 4.566  | 4.518  | 4.071  | 3.553  | 5.014  | 4.484  | 4.855  | 4.414  | 5.265  | 4.590  | 54394           | CRIF3      | NM_001277106_11_-1 |
| Rpl22          | -2.434 | -2.701 | 0.145  | -0.638 | -0.920 | 0.394  | 0.602  | -4.146 | -0.713 | -3.444 | 19934           | RPL22      | NM_001277113_4_+1  |
| Rpl22          | -0.642 | -0.161 | -0.406 | -0.231 | -0.616 | -1.891 | -0.312 | -1.576 | -0.346 | -1.572 | 19934           | RPL22      | NM_001277114_4_+1  |
| Rbpj           | 3.927  | 3.775  | 4.270  | 2.430  | 3.912  | 2.655  | 3.490  | 2.799  | 3.921  | 2.992  | 19664           | RBPJ       | NM_001277116_5_+1  |
| Hnrrnpr        | 5.263  | 5.441  | 4.841  | 5.111  | 5.188  | 5.241  | 5.322  | 4.738  | 4.566  | 4.461  | 74326           | HNRNPR     | NM_001277121_4_+1  |
| Hnrrnpr        | 2.500  | 2.391  | 3.056  | 3.222  | 3.084  | 2.569  | 2.211  | 2.105  | 2.741  | 2.863  | 74326           | HNRNPR     | NM_001277122_4_+1  |
| Hnrrnpr        | 3.171  | 4.426  | 3.284  | 4.132  | 3.669  | 3.697  | 4.006  | 4.088  | 3.379  | 4.048  | 74326           | HNRNPR     | NM_001277123_4_+1  |
| Gm867          | -4.981 | -2.616 | -4.911 | -3.543 | -4.900 | -4.060 | -4.601 | -4.282 | -4.981 | -3.461 | 333670          | C22orf15   | NM_001277132_10_-1 |
| Chd7           | 5.043  | 5.321  | 6.082  | 6.235  | 6.367  | 6.602  | 5.651  | 5.827  | 5.006  | 4.985  | 320790          | CHD7       | NM_001277149_4_+1  |
| Fam205a1       | -4.981 | -4.981 | -4.967 | -4.733 | -4.966 | -4.979 | -4.977 | -4.911 | -4.272 | -4.981 | 433698          | FAM205A    | NM_001277167_4_-1  |
| Gm1966         | 3.508  | 2.588  | 4.385  | 3.297  | 7.254  | 5.581  | 7.145  | 5.253  | 7.465  | 6.774  | 434223          | NA         | NM_001277179_7_-1  |
| Gm1966         | 0.439  | 0.086  | 0.471  | 2.184  | 4.073  | 1.997  | 4.146  | 2.469  | 4.602  | 3.759  | 434223          | NA         | NM_001277180_7_-1  |
| Gm1966         | -1.491 | 0.933  | 1.307  | 0.841  | 4.040  | 3.842  | 2.984  | 3.286  | 3.194  | 3.597  | 434223          | NA         | NM_001277181_7_-1  |
| Gm1966         | -2.735 | -3.159 | 1.185  | 0.598  | 3.983  | 3.188  | 4.224  | 3.145  | 3.542  | 3.575  | 434223          | NA         | NM_001277182_7_-1  |
| Gm1966         | -0.371 | 0.283  | 2.730  | 2.673  | 5.644  | 5.702  | 5.105  | 4.854  | 5.140  | 5.016  | 434223          | NA         | NM_001277183_7_-1  |
| Dlgap4         | -2.284 | -1.073 | 0.012  | -0.411 | -0.624 | -0.819 | -1.662 | -3.052 | -1.283 | -0.917 | 228836          | DLGAP4     | NM_001277186_2_+1  |
| Dlgap4         | -4.981 | -4.981 | -4.952 | -4.952 | -4.981 | -4.981 | -4.981 | -4.981 | -4.981 | -4.981 | 228836          | DLGAP4     | NM_001277187_2_+1  |
| Szrd1          | 1.468  | 1.775  | 1.979  | 2.124  | 1.733  | 1.167  | 2.213  | 1.574  | 2.466  | 1.565  | 213491          | SZRD1      | NM_001277195_4_-1  |
| Clec2f         | 1.395  | -0.553 | -0.743 | -0.353 | 0.325  | -0.355 | -0.797 | -0.440 | -1.297 | -0.121 | 435921          | CLEC2A     | NM_001277202_6_+1  |
| Crk            | 1.986  | 3.104  | 3.644  | 3.359  | 2.490  | 2.537  | 3.409  | 3.607  | 4.826  | 5.327  | 12928           | CRK        | NM_001277219_11_+1 |
| Crk            | -4.981 | -4.866 | -4.892 | -3.723 | -3.302 | -2.936 | -2.539 | -3.335 | -1.784 | -0.913 | 12928           | CRK        | NM_001277221_11_+1 |
| Zbtb24         | -0.638 | -2.859 | -0.571 | -1.199 | -3.619 | -1.943 | 0.044  | -0.217 | -0.453 | -3.038 | 268294          | ZBTB24     | NM_001277229_10_+1 |
| Zbtb24         | 4.110  | 4.028  | 2.976  | 2.983  | 3.364  | 3.385  | 3.000  | 2.744  | 3.145  | 2.798  | 268294          | ZBTB24     | NM_001277230_10_+1 |
| Crkl           | 0.002  | 0.010  | -2.194 | -1.807 | -2.086 | -2.178 | -1.574 | -2.822 | -1.580 | -0.536 | 12929           | CRKL       | NM_001277231_16_+1 |
| Hoxa9          | 1.823  | 1.485  | -3.704 | -4.334 | -3.732 | -2.808 | -4.946 | -3.924 | -4.981 | -4.981 | 15405           | HOXA9      | NM_001277238_6_-1  |
| Zmat4          | -4.981 | -4.981 | -3.964 | -4.978 | -4.702 | -4.944 | -4.723 | -4.628 | -4.981 | -4.981 | 320158          | ZMAT4      | NM_001277239_8_+1  |
| Acvrl1         | -3.498 | -3.032 | -2.690 | -3.427 | -3.409 | -4.794 | -3.126 | -4.507 | -3.282 | -3.077 | 11482           | ACVRL1     | NM_001277255_15_+1 |
| Spred1         | -1.474 | -4.981 | 0.925  | -0.847 | -0.024 | -0.208 | -0.254 | -0.413 | 0.382  | -1.041 | 114715          | SPRED1     | NM_001277256_2_+1  |
| Acvrl1         | -1.167 | -1.632 | 3.568  | 3.692  | 2.348  | 0.603  | 0.057  | 0.576  | 0.670  | 2.156  | 11482           | ACVRL1     | NM_001277257_15_+1 |

|                |        |        |        |        |        |        |        |        |        |        |                 |          |                    |
|----------------|--------|--------|--------|--------|--------|--------|--------|--------|--------|--------|-----------------|----------|--------------------|
| Acvrl1         | -0.072 | 0.063  | 1.499  | 1.542  | -1.300 | -1.569 | 0.157  | 0.278  | -3.411 | -2.222 | 11482           | ACVRL1   | NM_001277258_15_+1 |
| Acvrl1         | -4.133 | -3.083 | -2.905 | -4.672 | -4.720 | -4.929 | -2.819 | -4.880 | -1.281 | -4.466 | 11482           | ACVRL1   | NM_001277259_15_+1 |
| Tbxa2r         | 6.619  | 6.807  | -0.878 | -0.278 | -4.637 | -0.465 | -1.522 | 1.415  | -2.485 | -2.750 | 21390           | TBXA2R   | NM_001277265_10_+1 |
| Adam17         | -3.349 | -2.606 | -3.050 | -3.820 | -4.147 | -2.566 | -2.333 | -2.811 | -1.277 | -4.183 | 11491           | ADAM17   | NM_001277266_12_-1 |
| Fanc1          | -4.740 | -4.666 | -4.742 | -3.485 | -2.301 | -3.617 | -4.762 | -3.253 | -1.944 | -4.888 | 67030           | FANCL    | NM_001277273_11_+1 |
| Ank1           | -4.780 | -0.845 | -2.189 | -1.180 | -4.741 | -4.851 | -4.805 | -2.136 | -2.358 | -1.247 | 11733           | ANK1     | NM_001277280_8_+1  |
| Ank1           | -1.997 | -3.093 | -3.299 | 0.089  | -1.299 | 1.870  | -2.500 | -2.033 | -4.621 | -1.254 | 11733           | ANK1     | NM_001277281_8_+1  |
| Ank1           | -3.718 | -3.418 | -4.466 | -0.305 | -3.629 | -1.195 | -4.213 | 0.370  | -4.713 | -3.527 | 11733           | ANK1     | NM_001277284_8_+1  |
| Ank1           | -4.868 | -4.079 | -4.907 | -4.796 | -4.928 | -4.971 | -4.876 | -3.993 | -4.799 | -4.693 | 11733           | ANK1     | NM_001277286_8_+1  |
| Ank1           | -4.981 | -4.191 | -4.968 | -4.818 | -4.942 | -4.977 | -4.889 | -4.837 | -4.826 | -4.597 | 11733           | ANK1     | NM_001277289_8_+1  |
| Adck1          | 1.910  | 2.204  | 2.293  | 1.973  | 2.167  | 1.853  | 0.925  | 1.123  | 2.009  | 1.846  | 72113           | ADCK1    | NM_001277296_12_+1 |
| Adck1          | 3.662  | 3.951  | 3.175  | 2.351  | 2.882  | 1.500  | 3.136  | 1.445  | 2.555  | 2.446  | 72113           | ADCK1    | NM_001277297_12_+1 |
| Record_removed | -4.981 | -4.981 | -4.981 | -4.981 | -4.976 | -4.580 | -3.474 | -4.974 | -1.219 | -3.088 | Record_removeNA |          | NM_001277305_11_+1 |
| Mea1           | 0.476  | 2.286  | -1.504 | 0.572  | -0.789 | -0.113 | -1.114 | 0.665  | -1.270 | 0.176  | 17256           | MEA1     | NM_001277309_17_+1 |
| Mea1           | 5.951  | 5.862  | 5.491  | 5.329  | 5.334  | 4.919  | 5.416  | 5.014  | 4.710  | 4.231  | 17256           | MEA1     | NM_001277310_17_+1 |
| Mea1           | 0.028  | 0.448  | -0.380 | -1.341 | -1.981 | -1.896 | -0.942 | -2.266 | -1.029 | -0.859 | 17256           | MEA1     | NM_001277311_17_+1 |
| Mea1           | -0.590 | -0.424 | 0.197  | -2.264 | -4.535 | -4.806 | -0.676 | -4.677 | -3.988 | -4.352 | 17256           | MEA1     | NM_001277312_17_+1 |
| Fam134b        | -2.034 | -4.590 | -0.109 | 0.400  | 1.191  | 0.971  | 0.142  | 0.123  | 0.214  | -1.438 | 66270           | FAM134B  | NM_001277315_15_+1 |
| Fam134b        | -2.007 | -1.728 | -1.955 | -0.418 | -0.236 | -0.245 | -1.366 | -3.156 | -0.895 | -2.613 | 66270           | FAM134B  | NM_001277316_15_+1 |
| Fam134b        | -0.273 | -0.255 | 0.058  | -0.763 | -0.610 | 0.165  | 1.647  | -0.884 | -1.486 | -0.571 | 66270           | FAM134B  | NM_001277317_15_+1 |
| Fam134b        | 2.380  | 2.277  | 2.868  | 2.107  | 1.082  | 2.154  | 3.030  | 2.607  | 1.296  | 2.084  | 66270           | FAM134B  | NM_001277318_15_+1 |
| Ilf3           | 0.852  | 0.684  | -0.948 | -2.319 | -1.108 | -0.442 | -0.908 | -1.062 | -4.415 | -1.623 | 16201           | ILF3     | NM_001277321_9_+1  |
| Ilf3           | 2.923  | 1.137  | 2.249  | 1.544  | 2.551  | 1.426  | 2.595  | 2.027  | 2.094  | 0.892  | 16201           | ILF3     | NM_001277322_9_+1  |
| Sox6           | -4.981 | -3.345 | -4.769 | 1.288  | -4.659 | 0.768  | -4.772 | 0.805  | -4.981 | -1.937 | 20679           | SOX6     | NM_001277326_7_-1  |
| Sox6           | -4.981 | -3.538 | -4.832 | -4.725 | -4.782 | -4.793 | -4.842 | -4.895 | -4.714 | -4.799 | 20679           | SOX6     | NM_001277327_7_-1  |
| Sox6           | -4.981 | -1.496 | -4.032 | -2.946 | -2.694 | -2.865 | -3.629 | -2.552 | -4.981 | -2.876 | 20679           | SOX6     | NM_001277328_7_-1  |
| Pex5           | -1.159 | -0.008 | 0.392  | 0.553  | -1.280 | -1.525 | -0.577 | -1.475 | 0.185  | -0.230 | 19305           | PEX5     | NM_001277330_6_-1  |
| Tdrd5          | -4.981 | -4.981 | -4.981 | -4.981 | -4.864 | -2.631 | -4.954 | -4.968 | -4.981 | -4.981 | 214575          | TDRD5    | NM_001277730_1_-1  |
| Cav2           | -0.918 | -0.865 | -4.365 | -3.548 | -4.540 | -3.201 | -3.462 | -2.940 | -2.528 | -1.491 | 12390           | CAV2     | NM_001277756_6_+1  |
| Pex5           | 2.100  | 1.588  | 0.922  | 1.487  | 0.031  | 1.313  | 0.011  | 1.721  | 2.551  | 3.025  | 19305           | PEX5     | NM_001277805_6_-1  |
| Tmem216        | 3.865  | 3.820  | 1.789  | 1.532  | 1.574  | 2.102  | 1.440  | 1.983  | 1.104  | 0.772  | 68642           | TMEM216  | NM_001277860_19_-1 |
| Tmem216        | 3.275  | 3.116  | 1.337  | 0.964  | 2.053  | 1.717  | 0.282  | 0.551  | 0.615  | -1.426 | 68642           | TMEM216  | NM_001277861_19_-1 |
| Dazl           | -3.740 | -3.315 | -3.581 | -4.486 | -4.233 | -3.388 | -3.357 | -4.948 | -3.842 | -4.981 | 13164           | DAZ2     | NM_001277863_17_-1 |
| Mphosph9       | 0.904  | -1.268 | 0.546  | 1.284  | -1.061 | -0.139 | 0.901  | 0.775  | -0.259 | -3.993 | 269702          | MPHOSPH9 | NM_001277867_5_-1  |
| Tpm2           | 0.884  | 2.216  | 1.304  | 0.610  | 0.882  | 1.934  | -1.070 | -2.124 | -4.863 | -4.981 | 22004           | NA       | NM_001277875_4_-1  |
| Tpm2           | 1.578  | 2.194  | 3.290  | 2.086  | 2.921  | 2.699  | 0.972  | -0.676 | -0.880 | -2.145 | 22004           | NA       | NM_001277876_4_-1  |
| Prkaca         | -0.631 | -1.384 | -3.846 | -1.337 | 0.083  | -3.330 | -1.850 | -4.410 | -4.261 | -4.326 | 18747           | PRKACA   | NM_001277898_8_+1  |
| Tnnt1          | -4.680 | -3.811 | -4.809 | -4.683 | -4.808 | -4.908 | -4.280 | -4.758 | -4.077 | -4.434 | 21955           | TNNT1    | NM_001277903_7_-1  |
| Tnnt1          | -3.986 | -1.822 | -3.411 | -2.738 | -3.396 | -3.612 | -1.596 | -1.467 | 0.132  | -0.475 | 21955           | TNNT1    | NM_001277904_7_-1  |
| Ecel1          | -4.981 | -4.981 | -4.963 | -4.784 | -3.240 | -3.557 | -4.945 | -4.920 | -4.981 | -4.981 | 13599           | ECEL1    | NM_001277925_1_-1  |
| Casp8          | 1.904  | 3.613  | 0.086  | 0.892  | 0.839  | 2.081  | 0.153  | 2.595  | 2.210  | 2.831  | 12370           | CASP8    | NM_001277926_1_+1  |
| Lamb3          | -2.632 | -1.846 | -1.694 | -3.790 | -1.969 | -3.104 | -1.859 | -3.973 | -4.981 | -2.782 | 16780           | LAMB3    | NM_001277928_1_+1  |
| Casp9          | -0.921 | -2.044 | -2.957 | -4.193 | -2.688 | -4.033 | -1.634 | -4.330 | -4.034 | -4.365 | 12371           | CASP9    | NM_001277932_4_+1  |
| Rad51d         | -4.002 | -3.797 | -4.207 | -4.657 | -4.499 | -4.928 | -4.225 | -2.870 | -4.267 | -4.209 | 19364           | RAD51D   | NM_001277938_11_-1 |
| Rad51d         | 2.188  | 2.542  | 2.835  | 2.824  | 2.350  | 2.420  | 1.703  | 2.066  | 1.679  | 1.570  | 19364           | RAD51D   | NM_001277939_11_-1 |
| Rad51d         | -0.429 | -0.746 | -2.130 | -1.038 | -1.276 | -1.321 | -1.618 | -1.569 | -1.571 | -4.762 | 19364           | RAD51D   | NM_001277941_11_-1 |
| Rad51d         | -4.380 | -1.373 | -3.259 | -4.875 | -4.846 | -4.957 | -4.570 | -4.903 | -4.603 | -1.382 | 19364           | RAD51D   | NM_001277942_11_-1 |
| Apoc2          | -1.799 | -4.981 | -3.012 | -2.810 | -1.164 | -4.362 | 6.405  | 3.261  | 7.836  | 4.392  | 11813           | APOC2    | NM_001277944_7_-1  |
| Sh3gl3         | -4.981 | -4.981 | -1.898 | -0.946 | -4.891 | -4.976 | -4.858 | -3.660 | -4.981 | -4.981 | 20408           | SH3GL3   | NM_001277954_7_+1  |
| Sh3gl3         | -4.981 | -4.981 | -4.633 | -4.756 | -4.980 | -4.745 | -2.528 | -3.898 | -4.981 | -4.981 | 20408           | SH3GL3   | NM_001277955_7_+1  |
| Taf1a          | 2.006  | 2.747  | 1.475  | 1.095  | 1.823  | 1.743  | 1.361  | 1.356  | 1.811  | -0.879 | 21339           | TAF1A    | NM_001277957_1_+1  |
| Taf1a          | -1.337 | -4.275 | -4.897 | -4.902 | -3.363 | -4.167 | -4.908 | -4.955 | -4.602 | -4.802 | 21339           | TAF1A    | NM_001277958_1_+1  |
| Taf1a          | 0.808  | 1.275  | 1.839  | 1.831  | 1.805  | 1.437  | 0.796  | 1.383  | 0.965  | 1.219  | 21339           | TAF1A    | NM_001277959_1_+1  |
| Ly9            | 0.591  | 2.054  | -0.710 | 0.454  | 0.565  | 2.537  | -2.942 | 0.819  | 0.250  | 0.690  | 17085           | LY9      | NM_001277968_1_-1  |
| Itga6          | -0.908 | -1.723 | -0.542 | 0.039  | -2.374 | -0.370 | -2.297 | -2.523 | -4.313 | -2.814 | 16403           | ITGA6    | NM_001277970_2_+1  |
| Snap91         | -4.981 | -4.981 | -4.981 | -4.981 | -4.981 | -4.981 | -4.981 | -4.981 | -4.981 | -4.981 | 20616           | SNAP91   | NM_001277982_9_-1  |
| Snap91         | -4.981 | -4.981 | -4.981 | -4.981 | -4.928 | -4.626 | -4.981 | -4.981 | -4.981 | -4.981 | 20616           | SNAP91   | NM_001277983_9_-1  |
| Snap91         | -4.981 | -4.981 | -4.264 | -2.150 | -4.192 | -1.443 | -4.253 | -4.698 | -4.981 | -3.210 | 20616           | SNAP91   | NM_001277985_9_-1  |
| Snap91         | -4.981 | -4.981 | -4.981 | -4.981 | -4.981 | -4.981 | -4.981 | -4.981 | -4.981 | -4.981 | 20616           | SNAP91   | NM_001277986_9_-1  |
| Meis3          | -0.303 | 0.783  | -1.021 | -0.053 | 0.568  | 1.092  | -1.520 | -0.069 | -0.960 | -1.466 | 17537           | MEIS3    | NM_001277988_7_+1  |
| Meis3          | 0.589  | -1.270 | -3.377 | -1.465 | -0.885 | -1.081 | -2.725 | -2.334 | -1.310 | -1.745 | 17537           | MEIS3    | NM_001277989_7_+1  |
| Stk16          | 3.196  | 3.027  | 3.379  | 2.683  | 2.889  | 2.714  | 3.204  | 3.107  | 3.616  | 3.519  | 20872           | STK16    | NM_001277992_1_+1  |
| Farsb          | 0.682  | 1.887  | 1.807  | 2.802  | 1.941  | 1.990  | 1.891  | 3.268  | 1.036  | 2.345  | 23874           | FARSB    | NM_001278075_1_-1  |
| Ube2t          | 1.465  | 1.512  | 2.046  | 2.290  | 1.936  | 2.271  | 0.997  | 1.870  | -1.506 | -1.045 | 67196           | UBE2T    | NM_001278115_1_+1  |
| Hbb-b1         | 6.622  | 9.403  | 7.531  | 10.428 | 8.017  | 11.470 | 7.754  | 10.969 | 6.516  | 9.037  | 15129           | NA       | NM_001278161_7_-1  |
| Phi1d1         | 5.189  | 5.064  | 4.635  | 4.837  | 4.531  | 4.538  | 4.760  | 4.582  | 4.122  | 4.153  | 68845           | PIH1D1   | NM_001278207_7_+1  |
| Disp1          | -1.696 | -0.846 | -1.051 | -2.265 | 0.120  | -0.693 | -1.819 | -0.676 | -0.010 | -4.639 | 68897           | DISP1    | NM_001278218_1_-1  |
| Disp1          | 0.318  | 0.386  | -0.965 | -0.708 | 0.008  | -0.575 | -0.168 | -0.604 | -0.741 | -0.819 | 68897           | DISP1    | NM_001278219_1_-1  |
| Disp1          | -4.708 | -4.866 | -4.824 | -4.916 | -4.914 | -4.095 | -4.921 | -4.981 | -1.740 | -4.769 | 68897           | DISP1    | NM_001278220_1_-1  |
| Dmc1           | -4.843 | -4.981 | -2.945 | -4.972 | -2.358 | -4.901 | -3.192 | -4.768 | -2.213 | -4.981 | 13404           | DMC1     | NM_001278226_15_-1 |
| Prnp           | 4.328  | 3.985  | 5.226  | 5.066  | 5.755  | 5.383  | 4.439  | 4.634  | 3.966  | 4.681  | 19122           | PRNP     | NM_001278256_2_+1  |
| Prnd           | -4.422 | -4.981 | -4.974 | -4.852 | -4.851 | -4.184 | -4.463 | -4.933 | -4.981 | -4.981 | 26434           | PRND     | NM_001278257_2_+1  |
| Prn            | -4.981 | -4.981 | -4.929 | -4.912 | -4.971 | -4.973 | -4.930 | -4.978 | -4.981 | -4.981 | 111368          | PRND     | NM_001278258_2_+1  |
| Prn            | -4.857 | -4.981 | -4.976 | -4.964 | -4.971 | -4.977 | -4.854 | -4.965 | -4.981 | -4.981 | 111368          | PRND     | NM_001278259_2_+1  |

|          |        |        |        |        |        |        |        |        |        |        |           |                 |                     |
|----------|--------|--------|--------|--------|--------|--------|--------|--------|--------|--------|-----------|-----------------|---------------------|
| Fyb      | 7.559  | 7.431  | 6.321  | 6.187  | 8.515  | 8.842  | 6.905  | 6.497  | 3.654  | 4.944  | 23880     | FYB             | NM_001278269_15_+_1 |
| Gm44504  | -3.332 | -2.656 | -0.790 | -4.052 | -3.378 | -4.611 | -3.699 | -2.330 | -4.981 | -3.002 | 100169864 | UBL4A           | NM_001278271_X_-_1  |
| Gm44504  | 2.361  | 3.251  | 2.211  | 2.303  | 0.696  | 0.963  | 1.720  | 0.616  | -4.981 | -2.668 | 100169864 | UBL4A           | NM_001278272_X_-_1  |
| Rcn2     | 0.199  | 0.577  | 1.186  | -0.210 | -0.190 | -1.620 | -0.120 | -2.554 | 0.160  | -2.146 | 26611     | RCN2            | NM_001278274_9_+_1  |
| Ndufv2   | -0.663 | 1.280  | -0.096 | -0.698 | -1.312 | -1.526 | -2.044 | -1.142 | -1.532 | -2.585 | 72900     | NDUFV2          | NM_001278415_17_-_1 |
| Rab18    | 0.562  | -0.431 | -2.421 | -1.877 | -4.767 | -0.826 | -0.597 | -1.129 | -4.566 | -1.603 | 19330     | RAB18           | NM_001278447_18_+_1 |
| Prnd     | -3.243 | -4.981 | -4.967 | -4.232 | -3.182 | -3.589 | -3.023 | -4.887 | -4.981 | -4.981 | 26434     | PRND            | NM_001278520_2_+_1  |
| Rgag4    | 0.620  | 0.511  | 2.342  | 1.857  | 1.857  | 1.795  | 2.635  | 2.752  | 1.789  | 1.936  | 331474    | RGAG4           | NM_001278534_X_-_1  |
| Cryaa    | -4.981 | -4.592 | -4.979 | -4.951 | -4.975 | -4.975 | -4.959 | -4.975 | -4.903 | -4.922 | 12954     | CRYAA LOC102724 | NM_001278569_17_+_1 |
| Cryaa    | -4.981 | -1.276 | -4.889 | -3.852 | -4.809 | -0.329 | -4.318 | -2.781 | -3.750 | -3.098 | 12954     | CRYAA LOC102724 | NM_001278570_17_+_1 |
| Pomc     | -4.836 | -4.671 | -4.894 | -4.964 | -4.965 | -4.975 | -4.873 | -4.966 | -4.888 | -4.969 | 18976     | POMC            | NM_001278581_12_+_1 |
| Pomc     | -4.703 | -4.493 | -4.828 | -4.942 | -4.939 | -4.968 | -4.805 | -4.953 | -4.810 | -4.951 | 18976     | POMC            | NM_001278582_12_+_1 |
| Pomc     | -4.569 | -4.330 | -4.762 | -4.908 | -4.905 | -4.959 | -4.731 | -4.937 | -4.745 | -4.928 | 18976     | POMC            | NM_001278583_12_+_1 |
| Pomc     | 1.514  | 1.650  | -0.267 | 0.576  | 1.879  | 2.247  | 1.169  | 0.431  | -2.445 | -2.088 | 18976     | POMC            | NM_001278584_12_+_1 |
| Tnf      | -4.783 | -4.006 | -3.437 | -3.062 | -4.839 | -2.996 | -1.661 | -4.943 | -4.646 | -4.866 | 21926     | TNF             | NM_001278601_17_-_1 |
| Kbtbd12  | -0.408 | 1.771  | 0.560  | 1.774  | -3.220 | -2.660 | -4.458 | -1.431 | -4.981 | -4.316 | 74589     | KBTBD12         | NM_001278671_6_-_1  |
| Dennd2d  | -3.345 | 0.570  | -1.686 | -2.838 | -0.745 | -1.464 | -2.556 | -1.864 | -4.669 | -4.875 | 72121     | DENND2D         | NM_001278941_3_+_1  |
| Ctc1     | 1.350  | 0.749  | 0.603  | 0.929  | 1.992  | 1.762  | 2.861  | 1.820  | 3.446  | 2.587  | 68964     | CTC1            | NM_001281464_11_+_1 |
| Ctc1     | -3.037 | 0.107  | 0.773  | -0.012 | 0.241  | 0.603  | -0.075 | 0.351  | 1.185  | 1.329  | 68964     | CTC1            | NM_001281465_11_+_1 |
| Mroh2a   | -1.740 | -4.981 | -3.175 | -3.987 | -1.546 | -3.438 | 0.020  | -2.639 | -0.898 | -2.751 | 100040766 | MROH2A          | NM_001281466_1_+_1  |
| Psmc2b   | 4.204  | 3.990  | 4.923  | 4.989  | 5.659  | 5.100  | 5.530  | 5.096  | 5.277  | 5.191  | 621823    | NA              | NM_001281472_11_-_1 |
| Dgkh     | -4.981 | -4.981 | -4.760 | -3.830 | -3.482 | -4.965 | -3.619 | -3.152 | -1.955 | -4.842 | 380921    | DGKH            | NM_001281794_14_-_1 |
| Slc25a44 | 0.801  | 1.899  | 1.505  | 0.406  | 1.153  | 0.349  | 2.154  | 0.702  | 1.931  | 1.528  | 229517    | SLC25A44        | NM_001281795_3_-_1  |
| Def8     | 0.979  | 0.330  | 0.956  | 0.036  | -1.188 | -0.347 | -0.189 | -0.798 | 2.369  | 2.805  | 23854     | DEF8            | NM_001281803_8_+_1  |
| Plcx1    | 0.553  | 1.279  | 0.794  | 0.506  | 1.364  | 0.847  | 1.037  | 0.402  | 1.219  | 0.871  | 403178    | NA              | NM_001281812_5_+_1  |
| Sec23b   | 2.837  | 3.631  | 0.547  | 0.664  | 0.227  | -0.043 | 1.923  | -0.324 | -3.096 | -3.971 | 27054     | SEC23B          | NM_001281816_2_+_1  |
| Specc1   | -0.029 | -0.151 | 4.499  | 2.507  | 5.847  | 4.369  | 4.723  | 3.693  | 4.221  | 4.080  | 432572    | SPECC1          | NM_001281818_11_+_1 |
| Ace      | -4.981 | -4.981 | -2.274 | -2.679 | -1.327 | -1.286 | 5.740  | 5.903  | 6.116  | 6.309  | 11421     | ACE             | NM_001281819_11_+_1 |
| Phyhd1   | -2.353 | -2.574 | -3.436 | -2.168 | -4.202 | -4.783 | -3.232 | -4.017 | -3.630 | -4.127 | 227696    | PHYHD1          | NM_001281829_2_+_1  |
| Ifi27l2a | 0.972  | -1.697 | -3.106 | -3.762 | -1.408 | -3.022 | -0.697 | -1.544 | 1.131  | -0.065 | 76933     | NA              | NM_001281830_12_-_1 |
| S100a9   | -2.075 | -2.219 | -0.109 | 4.776  | 0.389  | 7.495  | 3.784  | 8.249  | 9.785  | 2.391  | 20202     | S100A9          | NM_001281852_3_-_1  |
| Aoah     | -0.773 | -4.981 | -3.859 | -4.945 | -3.948 | -4.980 | -2.555 | -2.784 | 1.401  | -1.637 | 27052     | AOAH            | NM_001281854_13_+_1 |
| Cysltr1  | -1.700 | -4.527 | 1.633  | 1.969  | -1.309 | -1.294 | 0.883  | 1.960  | 2.667  | 2.429  | 58861     | CYSLTR1         | NM_001281859_X_-_1  |
| Cysltr1  | -2.918 | -2.895 | -0.685 | 0.628  | -4.903 | -3.258 | -0.133 | 0.204  | -0.458 | 1.205  | 58861     | CYSLTR1         | NM_001281862_X_-_1  |
| Pbdc1    | 4.115  | 4.449  | 3.923  | 3.992  | 3.392  | 3.382  | 3.283  | 3.067  | 2.181  | 2.307  | 67683     | PBDC1           | NM_001281871_X_+_1  |
| Sema4d   | 4.737  | 5.848  | 4.889  | 4.597  | 7.352  | 7.288  | 7.031  | 6.552  | 8.424  | 7.809  | 20354     | SEMA4D          | NM_001281880_13_-_1 |
| Zmynd8   | 0.767  | -3.188 | -2.050 | -1.786 | -3.034 | -4.025 | -3.639 | -1.924 | -2.280 | 0.261  | 228880    | ZMYND8          | NM_001281926_2_-_1  |
| Gria3    | 0.599  | -0.179 | -2.441 | -3.648 | -4.415 | -4.939 | -1.409 | -2.121 | -2.950 | -2.322 | 53623     | GRIA3           | NM_001281929_X_+_1  |
| Pcsk7    | 3.511  | 3.831  | 3.813  | 3.735  | 3.807  | 3.884  | 3.640  | 3.821  | 3.731  | 3.666  | 18554     | PCSK7           | NM_001281934_9_+_1  |
| Crtam    | -2.599 | -4.981 | -4.838 | -4.042 | -4.752 | -2.704 | -3.839 | -2.183 | -1.649 | -4.006 | 54698     | CRTAM           | NM_001281954_9_-_1  |
| Csmd2    | -4.981 | -4.981 | -3.839 | -4.828 | -3.334 | -4.605 | -3.411 | -4.872 | -4.394 | -4.981 | 329942    | CSMD2           | NM_001281955_4_+_1  |
| Itk      | -1.959 | -0.734 | -3.617 | -2.786 | -4.103 | -3.357 | -3.305 | -4.273 | -2.115 | -1.543 | 16428     | ITK             | NM_001281965_11_-_1 |
| Itk      | -1.544 | -0.351 | -4.544 | -2.223 | -4.477 | -4.365 | -1.865 | -3.002 | -4.450 | -3.031 | 16428     | ITK             | NM_001281966_11_-_1 |
| Itk      | -4.981 | -4.981 | -4.954 | -4.954 | -4.129 | -2.496 | -2.638 | -1.280 | -4.473 | -4.981 | 16428     | ITK             | NM_001281967_11_-_1 |
| Itk      | -0.949 | 0.327  | -2.276 | -1.658 | -3.256 | -3.785 | -1.490 | -1.261 | -1.201 | -2.549 | 16428     | ITK             | NM_001281968_11_-_1 |
| Ankrd10  | 3.101  | 4.211  | 1.993  | 2.431  | 3.253  | 3.157  | 2.006  | 2.166  | 1.883  | 1.327  | 102334    | ANKRD10         | NM_001281974_8_-_1  |
| Ankrd10  | 2.142  | 1.879  | 0.889  | 0.670  | 0.250  | 0.475  | -0.517 | -0.862 | -0.566 | -0.548 | 102334    | ANKRD10         | NM_001281975_8_-_1  |
| Ctla4    | -1.469 | 0.508  | -2.293 | -1.170 | -2.827 | -3.088 | -3.035 | -2.972 | -4.981 | -2.163 | 12477     | CTLA4           | NM_001281976_1_+_1  |
| Invs     | -0.446 | 0.199  | -0.185 | -0.166 | 0.611  | 0.314  | 0.814  | 0.646  | 0.846  | 1.261  | 16348     | INVS            | NM_001281977_4_+_1  |
| Invs     | -4.105 | -3.827 | -4.235 | -1.938 | -3.885 | -2.882 | -4.246 | -3.084 | -4.354 | -4.756 | 16348     | INVS            | NM_001281978_4_+_1  |
| Lrmp     | 0.426  | 3.226  | 3.166  | 3.953  | 0.558  | 0.125  | 1.161  | 1.701  | -0.357 | 0.549  | 16970     | LRMP            | NM_001281980_6_+_1  |
| Lrmp     | 2.893  | 3.244  | 3.293  | 2.976  | 3.416  | 2.794  | 3.637  | 2.335  | 3.463  | 3.086  | 16970     | LRMP            | NM_001281981_6_+_1  |
| Rasal1   | -1.730 | -4.981 | -1.435 | -0.868 | 1.485  | 1.814  | -0.245 | 0.174  | -4.981 | -4.981 | 19415     | RASAL1          | NM_001281999_5_+_1  |
| Rbl2     | -0.508 | -2.541 | -1.265 | -0.263 | -0.348 | -4.900 | -1.768 | -4.596 | 1.471  | -3.786 | 19651     | RBL2            | NM_001282000_8_+_1  |
| Rbl2     | -2.314 | -1.195 | 1.024  | -3.627 | 0.579  | -1.892 | -0.447 | -3.447 | -0.265 | 0.854  | 19651     | RBL2            | NM_001282001_8_+_1  |
| Cnga3    | -4.981 | -4.981 | -4.984 | -4.984 | -1.842 | -4.829 | -2.514 | -4.950 | -4.981 | -4.981 | 12790     | CNGA3           | NM_001282010_1_+_1  |
| Prr3     | 0.291  | 0.600  | 0.809  | -0.618 | 1.517  | 0.156  | 0.646  | 0.634  | 1.224  | 1.178  | 75210     | PRR3            | NM_001282012_17_-_1 |
| Prr3     | 0.487  | 2.705  | 1.978  | 1.152  | 1.823  | 2.059  | 1.421  | 0.932  | -0.167 | 0.793  | 75210     | PRR3            | NM_001282013_17_-_1 |
| P2ry1    | -1.705 | -2.587 | -1.369 | -1.577 | -2.416 | -3.086 | 0.412  | 0.685  | 2.251  | 3.606  | 18441     | P2RY1           | NM_001282016_3_+_1  |
| Psmd4    | 6.358  | 6.300  | 6.094  | 6.086  | 6.025  | 6.192  | 6.057  | 5.904  | 5.612  | 5.190  | 19185     | PSMD4           | NM_001282017_3_-_1  |
| Vasp     | 0.776  | -3.041 | 2.222  | 2.016  | 2.855  | 1.992  | 2.654  | 1.994  | 2.095  | 2.325  | 22323     | VASP            | NM_001282021_7_-_1  |
| Vasp     | -3.751 | -1.825 | -2.356 | -2.259 | -1.754 | -2.664 | -3.753 | -2.414 | -2.724 | -1.287 | 22323     | VASP            | NM_001282022_7_-_1  |
| Prr3     | 2.120  | 0.149  | 0.883  | -0.188 | -0.504 | 0.662  | 0.247  | 1.552  | 1.494  | -0.888 | 75210     | PRR3            | NM_001282024_17_-_1 |
| Prr3     | 0.219  | 0.454  | 0.102  | -0.466 | -0.694 | -0.509 | -0.250 | -2.114 | -1.144 | -0.257 | 75210     | PRR3            | NM_001282025_17_-_1 |
| Gm14326  | 1.673  | 2.127  | 1.507  | 0.802  | 1.809  | 1.132  | 1.300  | 0.842  | 1.297  | 1.080  | 665211    | ZNF442          | NM_001282028_2_-_1  |
| Hax1     | 0.724  | 0.294  | -0.307 | -1.466 | -0.415 | 0.254  | -0.195 | -2.424 | -0.935 | -0.823 | 23897     | HAX1            | NM_001282032_3_-_1  |
| Sh3glb1  | 0.319  | 0.110  | -0.472 | 0.160  | 0.256  | -0.381 | 0.498  | -1.094 | 0.256  | -0.207 | 54673     | SH3GLB1         | NM_001282037_3_-_1  |
| Pmm1     | -4.862 | -1.272 | -3.962 | -4.442 | -4.962 | -4.973 | -4.517 | -4.809 | -4.794 | -4.893 | 29858     | PMM1            | NM_001282040_15_-_1 |
| Pmm1     | -4.932 | -4.099 | -4.657 | -4.075 | -4.969 | -4.970 | -4.715 | -4.692 | -4.958 | -4.954 | 29858     | PMM1            | NM_001282041_15_-_1 |
| Sh3glb1  | 6.523  | 6.479  | 7.056  | 7.056  | 7.239  | 7.239  | 7.216  | 7.088  | 7.394  | 7.089  | 54673     | SH3GLB1         | NM_001282042_3_-_1  |
| Schip1   | -4.981 | -4.981 | -4.951 | -4.631 | -4.974 | -4.973 | -4.980 | -4.979 | -4.981 | -3.758 | 30953     | SCHIP1          | NM_001282044_3_+_1  |
| Schip1   | -4.981 | -4.981 | -4.932 | -3.563 | -4.963 | -4.823 | -4.945 | -4.265 | -4.981 | -4.981 | 30953     | SCHIP1          | NM_001282045_3_+_1  |
| Gak      | 1.919  | 3.142  | 1.929  | 2.341  | 3.179  | 1.888  | 2.400  | 2.267  | 3.069  | 2.283  | 231580    | GAK             | NM_001282051_5_-_1  |
| Gak      | 1.110  | 1.154  | -0.724 | -2.161 | -0.482 | -1.739 | 0.253  | -1.625 | 1.751  | 0.003  | 231580    | GAK             | NM_001282052_5_-_1  |

|          |        |        |        |        |        |        |        |        |        |        |           |          |                    |
|----------|--------|--------|--------|--------|--------|--------|--------|--------|--------|--------|-----------|----------|--------------------|
| Msh4     | -3.727 | -1.663 | -4.220 | -4.922 | -4.928 | -4.978 | -4.962 | -4.972 | -4.981 | -4.981 | 55993     | MSH4     | NM_001282054_3_-1  |
| Ddx46    | 6.234  | 6.197  | 6.560  | 6.288  | 6.644  | 6.634  | 6.690  | 6.532  | 6.418  | 6.333  | 212880    | DDX46    | NM_001282055_13_+1 |
| Cyb561a3 | 7.383  | 7.461  | 4.658  | 5.139  | 4.802  | 5.237  | 3.794  | 2.868  | 1.286  | -1.510 | 225912    | CYB561A3 | NM_001282064_19_+1 |
| Cyb561a3 | 6.690  | 6.812  | 4.477  | 4.772  | 4.596  | 4.815  | 3.736  | 3.813  | 2.667  | 2.578  | 225912    | CYB561A3 | NM_001282065_19_+1 |
| Cyb561a3 | 9.990  | 10.113 | 7.102  | 7.474  | 7.237  | 7.470  | 6.403  | 6.313  | 4.192  | 4.175  | 225912    | CYB561A3 | NM_001282067_19_+1 |
| Deaf1    | 2.385  | 2.700  | -1.594 | -4.787 | -0.215 | -1.889 | -1.593 | -1.418 | -2.475 | 0.653  | 54006     | DEAF1    | NM_001282072_7_-1  |
| Deaf1    | 2.251  | 1.576  | 1.690  | 0.624  | 0.825  | 1.392  | 1.174  | 1.316  | 2.278  | 2.247  | 54006     | DEAF1    | NM_001282073_7_-1  |
| Deaf1    | 1.468  | 1.333  | 0.145  | -1.236 | -1.828 | -1.786 | -1.207 | -1.624 | 0.266  | -0.683 | 54006     | DEAF1    | NM_001282076_7_-1  |
| Gtf2a2   | -0.094 | 0.423  | 0.017  | -0.101 | 0.191  | -0.251 | 0.077  | -2.656 | -1.295 | -0.271 | 235459    | GTF2A2   | NM_001282083_9_+1  |
| Gtf2a2   | 0.084  | -0.172 | -1.006 | -1.836 | -0.469 | -0.747 | -1.038 | -1.831 | -0.433 | -0.753 | 235459    | GTF2A2   | NM_001282084_9_+1  |
| Trpc6    | -3.423 | -3.264 | -4.168 | -3.953 | -3.389 | -3.842 | -4.027 | -4.199 | -3.599 | -4.162 | 22068     | TRPC6    | NM_001282087_9_+1  |
| Tomt     | -2.476 | -2.217 | -1.644 | -3.045 | -2.534 | -3.767 | -2.292 | -3.815 | -1.799 | -2.183 | 791260    | LRTOMT   | NM_001282088_7_-1  |
| Wac      | 5.287  | 5.691  | 5.397  | 5.185  | 5.410  | 5.527  | 5.574  | 5.541  | 5.927  | 6.158  | 225131    | WAC      | NM_001282093_18_+1 |
| Tjp3     | -0.970 | -3.539 | -1.777 | -0.294 | 0.194  | -2.594 | -0.276 | -4.925 | -2.883 | 0.176  | 27375     | TJP3     | NM_001282095_10_-1 |
| Tjp3     | 2.964  | 3.180  | 3.026  | 2.636  | 2.175  | 2.785  | 2.297  | 1.994  | 1.175  | 1.191  | 27375     | TJP3     | NM_001282096_10_-1 |
| Slc10a7  | -4.459 | -4.228 | -4.669 | -4.547 | -4.508 | -3.557 | -1.837 | -2.208 | -4.312 | -1.638 | 76775     | SLC10A7  | NM_001282108_8_+1  |
| Slc10a7  | -4.689 | -4.061 | -3.011 | -4.829 | -4.826 | -4.935 | -4.349 | -4.846 | -1.677 | -4.397 | 76775     | SLC10A7  | NM_001282109_8_+1  |
| Mtif2    | -4.916 | -4.571 | -2.659 | -2.305 | -2.055 | -2.987 | -4.951 | -2.185 | -1.692 | -1.028 | 76784     | MTIF2    | NM_001282118_11_+1 |
| Mtif2    | 0.252  | 0.471  | -0.084 | 0.228  | -0.003 | 0.230  | 0.468  | 0.365  | 0.815  | 1.663  | 76784     | MTIF2    | NM_001282119_11_+1 |
| Mtif2    | -0.432 | -1.582 | -1.025 | -1.474 | 0.119  | 0.981  | -2.005 | -0.848 | -0.003 | -0.121 | 76784     | MTIF2    | NM_001282120_11_+1 |
| Brpf1    | 2.599  | 2.076  | 3.274  | 3.379  | 3.854  | 3.077  | 3.817  | 3.288  | 5.109  | 5.448  | 78783     | BRPF1    | NM_001282126_6_+1  |
| Brpf1    | 2.502  | 1.681  | 2.998  | 3.499  | 3.617  | 2.634  | 3.771  | 3.385  | 4.859  | 5.080  | 78783     | BRPF1    | NM_001282127_6_+1  |
| Brpf1    | 2.547  | 3.009  | 4.218  | 4.058  | 4.181  | 4.696  | 4.479  | 4.852  | 6.031  | 5.817  | 78783     | BRPF1    | NM_001282128_6_+1  |
| Gm15816  | -4.981 | -4.981 | -4.957 | -4.957 | -4.963 | -2.977 | -4.976 | -4.904 | -4.981 | -4.981 | 101056408 | NA       | NM_001282148_8_-1  |
| Mroh6    | -4.981 | -4.981 | -3.485 | -3.980 | -4.692 | -4.976 | -4.936 | -4.152 | -4.981 | -3.855 | 223645    | MROH6    | NM_001282443_15_-1 |
| Magoh    | 6.292  | 6.393  | 6.173  | 6.100  | 6.154  | 6.095  | 6.308  | 6.019  | 4.748  | 4.706  | 17149     | MAGOH    | NM_001282737_4_+1  |
| Fancc    | -3.007 | -0.547 | 0.674  | -2.844 | 1.015  | -0.625 | 0.145  | -3.202 | 0.446  | -4.898 | 14088     | FANCC    | NM_001282942_13_-1 |
| Ccne2    | -3.463 | 0.875  | 1.854  | 1.947  | 2.335  | 1.925  | 1.166  | 2.008  | 1.569  | -0.808 | 12448     | CCNE2    | NM_001282943_4_+1  |
| Adora1   | -4.981 | -4.981 | -4.885 | -4.973 | -4.948 | -4.971 | -4.946 | -4.974 | -4.732 | -4.934 | 11539     | ADORA1   | NM_001282945_1_-1  |
| Apaf1    | -0.725 | 1.823  | -1.000 | -0.888 | -1.002 | -2.430 | -2.592 | -2.865 | -0.409 | 1.468  | 11783     | APAF1    | NM_001282947_10_-1 |
| Cd63     | -4.746 | -4.384 | 2.238  | 1.917  | 2.038  | 2.409  | 2.162  | 0.245  | -4.953 | -4.977 | 12512     | CD63     | NM_001282966_10_+1 |
| Elk3     | 1.450  | 2.309  | -1.361 | 0.512  | 2.235  | 3.084  | 1.957  | 2.202  | 2.068  | 2.271  | 13713     | ELK3     | NM_001282967_10_-1 |
| Naca     | 1.222  | -0.352 | 0.017  | 0.545  | 0.570  | 0.718  | 0.317  | -1.053 | -1.420 | -2.384 | 17938     | NACA     | NM_001282976_10_+1 |
| Cacnb1   | -1.238 | -3.832 | -1.363 | -0.507 | -0.179 | -0.561 | 0.087  | -0.038 | 0.427  | 0.241  | 12295     | CACNB1   | NM_001282977_11_-1 |
| Cacnb1   | 0.564  | 1.119  | 0.418  | -0.720 | -0.032 | -0.659 | 1.083  | -0.355 | 0.584  | 0.135  | 12295     | CACNB1   | NM_001282978_11_-1 |
| Pcnt     | 4.231  | 4.073  | 4.491  | 4.436  | 4.977  | 5.047  | 4.464  | 4.614  | 4.871  | 4.443  | 18541     | NA       | NM_001282992_10_-1 |
| Rad17    | 1.465  | 1.120  | -0.736 | -0.501 | 0.480  | 0.324  | -0.450 | -0.216 | 1.224  | 0.021  | 19356     | RAD17    | NM_001283011_13_-1 |
| Ptbp1    | -3.171 | 1.055  | -0.279 | 0.629  | -1.723 | 0.077  | -0.307 | -0.436 | 0.769  | 0.353  | 19205     | PTBP1    | NM_001283013_10_+1 |
| Spin1    | 3.883  | 2.998  | -0.291 | -0.064 | 0.085  | 0.675  | 0.010  | 0.152  | 1.692  | 0.945  | 20729     | SPIN1    | NM_001283028_13_+1 |
| Spin1    | 3.833  | 4.807  | 2.282  | 0.613  | 2.931  | 2.966  | 2.594  | 2.053  | 3.241  | 2.728  | 20729     | SPIN1    | NM_001283029_13_+1 |
| Spin1    | -0.599 | -4.102 | -4.385 | -4.800 | -4.685 | -2.861 | -4.517 | -4.809 | -4.025 | -4.327 | 20729     | SPIN1    | NM_001283030_13_+1 |
| Abl1     | 0.682  | -1.233 | 0.929  | 0.846  | 1.272  | 0.222  | -2.814 | 0.849  | 0.352  | 0.199  | 11350     | ABL1     | NM_001283045_2_+1  |
| Abl1     | 0.587  | -2.962 | -1.270 | -1.931 | -2.308 | -0.774 | -0.833 | 1.096  | 0.540  | 0.958  | 11350     | ABL1     | NM_001283046_2_+1  |
| Abl1     | 0.726  | -2.599 | -0.530 | -0.556 | -1.015 | -2.555 | -0.708 | 0.135  | 1.393  | -0.739 | 11350     | ABL1     | NM_001283047_2_+1  |
| Tmipo    | 2.516  | 3.248  | 4.719  | 4.518  | 4.846  | 4.232  | 4.396  | 4.236  | 3.620  | 5.530  | 21917     | TMPO     | NM_001283048_10_-1 |
| Ewsr1    | 6.319  | 6.322  | 6.349  | 6.817  | 7.077  | 6.761  | 6.403  | 6.462  | 6.454  | 6.215  | 14030     | NA       | NM_001283061_11_-1 |
| Ewsr1    | 3.101  | 3.870  | 2.109  | 2.654  | 3.710  | 4.300  | 3.699  | 3.451  | 1.400  | 1.066  | 14030     | NA       | NM_001283062_11_-1 |
| Ewsr1    | 5.040  | 5.220  | 5.486  | 5.410  | 5.977  | 5.938  | 5.508  | 5.632  | 5.760  | 6.053  | 14030     | NA       | NM_001283063_11_-1 |
| Homer1   | 0.238  | 0.014  | 0.776  | 0.958  | 1.056  | 1.075  | 0.652  | 1.257  | 2.631  | 2.646  | 26556     | HOMER1   | NM_001284189_13_+1 |
| Srsf10   | 3.487  | 2.905  | 3.845  | 4.152  | 3.967  | 3.831  | 3.572  | 3.734  | 3.003  | 3.439  | 14105     | SRSF10   | NM_001284195_4_+1  |
| Srsf10   | 3.849  | 3.700  | 3.159  | 3.720  | 3.270  | 3.243  | 3.425  | 3.062  | 1.851  | 3.172  | 14105     | SRSF10   | NM_001284196_4_+1  |
| Dnmt3l   | -4.981 | -4.981 | -4.949 | -4.949 | -4.499 | -4.919 | -4.970 | -4.957 | -4.981 | -2.047 | 54427     | DNMT3L   | NM_001284197_10_+1 |
| Dnmt3l   | -4.981 | -4.981 | -4.981 | -4.981 | -4.981 | -4.981 | -4.981 | -4.981 | -4.981 | -4.981 | 54427     | DNMT3L   | NM_001284198_10_+1 |
| Dnmt3l   | -4.981 | -4.981 | -4.980 | -4.976 | -4.970 | -4.976 | -4.958 | -4.976 | -4.981 | -4.956 | 54427     | DNMT3L   | NM_001284199_10_+1 |
| Dnmt3l   | -4.981 | -4.981 | -4.962 | -4.361 | -4.474 | -4.876 | -4.232 | -4.936 | -4.981 | -2.875 | 54427     | DNMT3L   | NM_001284200_10_+1 |
| Agtppbp1 | 0.833  | 0.343  | 1.921  | 1.219  | 1.314  | 1.282  | 1.467  | 1.028  | 1.899  | 1.956  | 67269     | AGTPBP1  | NM_001284218_13_-1 |
| Agtppbp1 | -0.579 | -4.256 | 2.128  | 0.567  | 0.130  | -0.269 | 0.206  | 0.879  | 2.514  | 2.113  | 67269     | AGTPBP1  | NM_001284219_13_-1 |
| Agtppbp1 | -4.981 | -0.596 | -1.666 | -0.661 | -1.791 | -2.828 | -3.184 | -2.111 | -4.856 | -2.394 | 67269     | AGTPBP1  | NM_001284221_13_-1 |
| Flot2    | -4.306 | -1.245 | -3.389 | -3.158 | -4.614 | -1.470 | -2.901 | -1.542 | 0.848  | 0.942  | 14252     | FLOT2    | NM_001284227_11_+1 |
| Flot2    | -3.346 | 0.177  | 1.042  | 0.545  | 0.781  | -0.523 | 1.484  | -0.933 | 1.469  | 1.100  | 14252     | FLOT2    | NM_001284228_11_+1 |
| Nasp     | -4.837 | -4.870 | -4.853 | -4.931 | -2.403 | -2.835 | -4.852 | -3.689 | -4.630 | -2.485 | 50927     | NASP     | NM_001284229_4_-1  |
| Hdac5    | 2.606  | 2.607  | -2.364 | -1.149 | -1.223 | -0.314 | 0.210  | -0.567 | 1.992  | 2.373  | 15184     | HDAC5    | NM_001284248_11_-1 |
| Hdac5    | -3.334 | 2.027  | -2.302 | -1.652 | -0.237 | -0.497 | -0.137 | 0.852  | 2.651  | 1.311  | 15184     | HDAC5    | NM_001284249_11_-1 |
| Hdac5    | -4.718 | -4.804 | -1.183 | -4.474 | -2.020 | -1.342 | -3.265 | -4.239 | -1.790 | -4.346 | 15184     | HDAC5    | NM_001284250_11_-1 |
| Ryk      | -3.219 | -1.335 | -2.845 | -2.050 | -2.758 | -4.094 | -3.191 | -2.218 | -3.301 | -2.782 | 20187     | RYK      | NM_001284258_9_+1  |
| Tmem201  | 1.959  | 1.613  | 1.221  | 1.350  | 2.254  | 2.261  | 1.549  | 1.981  | -0.002 | -0.538 | 230917    | TMEM201  | NM_001284270_4_-1  |
| Ttk      | -2.273 | -3.315 | -1.563 | -4.891 | -4.943 | -2.876 | -2.060 | -4.642 | -1.790 | -4.971 | 22137     | TTK      | NM_001284272_9_+1  |
| Tmem201  | -1.908 | -0.669 | -3.050 | -4.191 | -2.767 | -4.716 | -2.855 | -4.769 | -1.898 | -1.113 | 230917    | TMEM201  | NM_001284273_4_-1  |
| Rnf146   | 6.096  | 6.368  | 6.118  | 6.074  | 5.596  | 5.767  | 5.669  | 5.729  | 5.634  | 5.739  | 68031     | RNF146   | NM_001284279_10_-1 |
| Aifm2    | -0.946 | -0.997 | -0.384 | 0.406  | -0.354 | 0.773  | 0.789  | 0.069  | 1.342  | 2.196  | 71361     | AIFM2    | NM_001284300_10_+1 |
| Ube2j2   | -4.981 | -4.981 | -2.607 | -3.593 | -4.251 | -4.643 | -4.526 | -4.969 | -1.843 | -3.643 | 140499    | UBE2J2   | NM_001284312_4_+1  |
| Ube2j2   | 0.871  | 1.347  | 0.242  | 0.731  | -0.644 | -0.939 | -1.403 | 1.060  | 0.699  | 1.504  | 140499    | UBE2J2   | NM_001284314_4_+1  |
| Ncoa4    | -0.449 | -0.370 | -2.025 | 0.071  | -2.306 | -2.107 | -0.150 | -1.688 | -4.443 | -0.819 | 27057     | NCOA4    | NM_001284319_14_+1 |
| Syncrip  | 1.769  | 3.315  | 3.277  | 3.003  | 2.848  | 2.689  | 3.261  | 3.116  | 2.494  | 3.401  | 56403     | SYNCRIP  | NM_001284328_9_-1  |

|               |        |        |        |        |        |        |        |        |        |        |        |          |                     |
|---------------|--------|--------|--------|--------|--------|--------|--------|--------|--------|--------|--------|----------|---------------------|
| Lin7a         | -4.981 | -4.981 | -4.981 | -4.981 | -4.981 | -4.981 | -4.979 | -4.981 | -4.812 | -4.981 | 108030 | LIN7A    | NM_001284329_10_+_1 |
| Shisa5        | 5.641  | 4.879  | 5.528  | 5.186  | 6.243  | 6.036  | 7.167  | 7.256  | 7.863  | 7.578  | 66940  | SHISA5   | NM_001284332_9_+_1  |
| Gas2l3        | 1.065  | 0.786  | -1.570 | -1.087 | -0.352 | -0.548 | -1.010 | -1.915 | -4.803 | -3.627 | 237436 | GAS2L3   | NM_001284344_10_-_1 |
| Atp8a1        | 1.125  | 0.977  | -0.702 | 0.966  | -0.900 | 0.569  | 1.433  | -0.047 | -0.169 | -0.054 | 11980  | ATP8A1   | NM_001284345_5_-_1  |
| Dph3          | -1.141 | -1.910 | -2.626 | -2.454 | -3.660 | -2.769 | -2.027 | -2.420 | -2.711 | -2.045 | 105638 | DPH3     | NM_001284346_14_-_1 |
| Shprh         | -0.193 | 1.045  | -0.070 | 0.478  | 1.277  | 1.026  | 0.236  | -0.706 | -0.950 | -0.368 | 268281 | SHPRH    | NM_001284354_10_+_1 |
| Nprl3         | -1.091 | -0.413 | -4.869 | -3.495 | -4.934 | -2.889 | -4.788 | -2.181 | -2.089 | -4.914 | 17168  | NPRL3    | NM_001284359_11_-_1 |
| Nprl3         | 2.566  | 2.740  | 1.046  | 0.822  | 1.923  | 0.842  | 1.763  | -0.771 | 1.547  | 0.263  | 17168  | NPRL3    | NM_001284360_11_-_1 |
| Atf2          | 3.739  | 4.016  | 3.676  | 3.115  | 3.550  | 3.492  | 3.452  | 3.599  | 3.689  | 3.909  | 11909  | ATF2     | NM_001284369_2_-_1  |
| Atf2          | -4.868 | -4.528 | -4.863 | -4.961 | -4.644 | -4.895 | -4.804 | -4.940 | -4.673 | -4.899 | 11909  | ATF2     | NM_001284370_2_-_1  |
| Atf2          | -0.024 | -0.597 | 0.620  | 0.056  | 1.022  | -0.090 | 0.521  | 0.923  | 0.937  | 0.207  | 11909  | ATF2     | NM_001284371_2_-_1  |
| Atf2          | -4.628 | -4.036 | -4.766 | -4.892 | -4.308 | -4.856 | -4.668 | -4.910 | -4.606 | -4.826 | 11909  | ATF2     | NM_001284372_2_-_1  |
| Atf2          | 2.940  | 3.027  | 2.912  | 2.735  | 2.854  | 2.471  | 2.938  | 2.699  | 2.356  | 3.459  | 11909  | ATF2     | NM_001284373_2_-_1  |
| Atf2          | -4.281 | -3.952 | -2.454 | -3.514 | -1.971 | -4.761 | 0.510  | -2.451 | -0.422 | -0.630 | 11909  | ATF2     | NM_001284374_2_-_1  |
| Atf2          | -1.802 | -0.625 | -4.694 | -4.892 | -3.641 | -1.730 | -4.063 | -3.101 | -1.200 | -1.615 | 11909  | ATF2     | NM_001284376_2_-_1  |
| Adra1b        | -4.239 | -3.075 | -4.963 | -4.674 | -4.545 | -4.662 | -4.968 | -4.751 | -4.981 | -4.981 | 11548  | ADRA1B   | NM_001284380_11_-_1 |
| Adra1b        | -4.617 | -4.089 | -4.976 | -4.926 | -4.929 | -4.964 | -4.981 | -4.981 | -4.981 | -4.981 | 11548  | ADRA1B   | NM_001284381_11_-_1 |
| 3830406C13Rik | 3.629  | 4.490  | 3.107  | 3.478  | 3.299  | 3.265  | 2.995  | 2.955  | 2.571  | 2.984  | 218734 | C3orf14  | NM_001284383_14_+_1 |
| 3830406C13Rik | 2.592  | 1.500  | 1.424  | 1.075  | 1.626  | 1.607  | -0.688 | 0.506  | -0.755 | 0.313  | 218734 | C3orf14  | NM_001284384_14_+_1 |
| 3830406C13Rik | 3.353  | 3.491  | 2.104  | 2.567  | 1.821  | 2.557  | 1.672  | 1.184  | 0.895  | 1.297  | 218734 | C3orf14  | NM_001284385_14_+_1 |
| 3830406C13Rik | 0.030  | 1.534  | -0.747 | -0.252 | 1.238  | -0.265 | -0.203 | 0.787  | 0.046  | -0.646 | 218734 | C3orf14  | NM_001284386_14_+_1 |
| 3830406C13Rik | 2.075  | 2.354  | 1.428  | 2.020  | 0.568  | 1.643  | 1.904  | 1.895  | 1.267  | 1.863  | 218734 | C3orf14  | NM_001284387_14_+_1 |
| Sept4         | 4.894  | 5.342  | 1.178  | 0.980  | 0.013  | 1.532  | -1.191 | 0.103  | -1.633 | -4.740 | 18952  | SEPT4    | NM_001284392_11_+_1 |
| Gngt2         | 5.484  | 4.968  | 3.394  | 3.377  | 6.135  | 6.130  | 7.235  | 6.794  | 6.686  | 6.151  | 14710  | GNGT2    | NM_001284393_11_+_1 |
| Sept4         | -4.981 | -4.981 | -4.966 | -4.695 | -4.805 | -4.875 | -4.948 | -4.965 | -4.981 | -4.981 | 18952  | SEPT4    | NM_001284394_11_+_1 |
| Gngt2         | 3.419  | 2.183  | 3.395  | 3.956  | 6.348  | 6.550  | 8.051  | 7.933  | 7.476  | 7.155  | 14710  | GNGT2    | NM_001284397_11_+_1 |
| Sept4         | 3.419  | 3.900  | 0.554  | -0.181 | -1.904 | 0.604  | -3.144 | -1.929 | -2.923 | -2.833 | 18952  | SEPT4    | NM_001284398_11_+_1 |
| Ddhd1         | -2.347 | -1.858 | 0.025  | 1.301  | 2.334  | 2.849  | 1.662  | 0.164  | -0.401 | 2.039  | 114874 | DDHD1    | NM_001284399_14_-_1 |
| P2rx7         | -3.885 | -0.454 | -3.776 | -4.177 | -4.513 | -1.431 | -1.483 | 0.709  | -2.597 | -1.854 | 18439  | P2RX7    | NM_001284402_5_+_1  |
| Casp3         | 3.719  | 3.398  | 5.650  | 5.556  | 4.822  | 4.418  | 4.852  | 4.752  | 5.154  | 5.296  | 12367  | CASP3    | NM_001284409_8_+_1  |
| Bcl2l11       | 0.782  | 1.017  | -0.836 | -0.814 | 1.032  | 0.031  | 0.318  | 0.639  | 1.519  | 1.918  | 12125  | BCL2L11  | NM_001284410_2_+_1  |
| Vps25         | 2.367  | 3.040  | 1.995  | 1.093  | 1.392  | 1.695  | 1.058  | 1.080  | 0.617  | 0.460  | 28084  | VPS25    | NM_001284411_11_+_1 |
| Vps25         | 1.503  | 1.848  | 1.203  | 1.331  | 0.767  | 1.007  | -0.029 | 0.386  | 0.812  | 1.108  | 28084  | VPS25    | NM_001284412_11_+_1 |
| Vps25         | 1.090  | 0.624  | 0.443  | -0.197 | -0.184 | -0.948 | -0.194 | -1.034 | -0.693 | -0.988 | 28084  | VPS25    | NM_001284414_11_+_1 |
| Smtm          | -4.739 | -4.398 | -3.876 | -3.911 | -3.879 | -3.280 | -2.934 | -3.127 | -4.297 | -4.776 | 29856  | SMTM     | NM_001284427_11_-_1 |
| Smtm          | -4.628 | -3.841 | -4.707 | -4.767 | -4.692 | -4.935 | -4.809 | -3.141 | -4.549 | -4.418 | 29856  | SMTM     | NM_001284428_11_-_1 |
| Smtm          | -4.373 | -1.553 | -4.685 | -4.601 | -4.463 | -4.779 | -3.807 | -4.768 | -3.845 | -4.483 | 29856  | SMTM     | NM_001284429_11_-_1 |
| Cask          | -3.188 | -2.877 | -1.862 | -4.333 | -3.111 | -4.619 | -0.909 | -4.409 | -4.196 | -4.390 | 12361  | CASK     | NM_001284503_X_-_1  |
| Cask          | 1.754  | 1.290  | 2.437  | 1.485  | 2.776  | 2.199  | 2.374  | 2.646  | 3.260  | 3.035  | 12361  | CASK     | NM_001284504_X_-_1  |
| Cask          | -2.408 | 0.250  | 2.302  | 1.749  | 2.979  | 1.932  | 3.398  | 2.653  | 4.638  | 4.835  | 12361  | CASK     | NM_001284505_X_-_1  |
| Plxnb2        | 3.643  | 4.735  | 2.361  | 1.143  | 3.549  | 3.881  | 5.145  | 4.532  | 6.374  | 6.063  | 140570 | PLXNB2   | NM_001284506_15_-_1 |
| Cmah          | 2.305  | 3.598  | -4.375 | -0.069 | -4.662 | -1.439 | -3.623 | 0.490  | -4.420 | -0.992 | 12763  | NA       | NM_001284519_13_+_1 |
| Cmah          | 5.739  | 6.268  | -0.220 | 3.274  | 0.138  | 3.783  | -0.320 | 3.967  | 1.718  | 1.788  | 12763  | NA       | NM_001284520_13_+_1 |
| Larp4         | -3.543 | -3.418 | -4.178 | -4.604 | -3.037 | -4.917 | -4.069 | -4.859 | -0.693 | -1.478 | 207214 | LARP4    | NM_001284521_15_+_1 |
| Larp4         | -3.460 | -3.386 | -3.058 | -4.386 | -3.492 | -3.624 | -2.331 | -4.800 | -3.593 | -0.882 | 207214 | LARP4    | NM_001284522_15_+_1 |
| Larp4         | 4.682  | 4.079  | 4.962  | 4.823  | 4.751  | 5.092  | 4.667  | 4.770  | 4.611  | 5.025  | 207214 | LARP4    | NM_001284523_15_+_1 |
| Chit1         | -4.981 | -4.981 | -4.981 | -4.981 | -4.968 | -4.968 | -4.923 | -4.886 | -3.677 | -4.981 | 71884  | CHIT1    | NM_001284524_1_+_1  |
| Chit1         | -4.981 | -3.841 | -4.981 | -4.981 | -4.843 | -4.901 | -4.954 | -4.768 | -3.075 | -4.640 | 71884  | CHIT1    | NM_001284525_1_+_1  |
| Calu          | 2.214  | 2.886  | -0.760 | -0.266 | 0.039  | 1.858  | 0.861  | 1.607  | -0.406 | 0.736  | 12321  | CALU     | NM_001285412_6_+_1  |
| Smagp         | -4.301 | -4.269 | -3.161 | -1.720 | -2.327 | -2.826 | -3.860 | -3.813 | -4.949 | -4.860 | 207818 | SMAGP    | NM_001285413_15_-_1 |
| Smagp         | -1.961 | -1.362 | -0.634 | -3.156 | -4.530 | -4.824 | -2.726 | -4.611 | -4.770 | -2.407 | 207818 | SMAGP    | NM_001285414_15_-_1 |
| Esd           | 3.398  | 3.201  | 2.251  | 2.589  | 1.746  | 2.333  | 1.798  | 1.895  | 2.981  | 2.705  | 13885  | ESD      | NM_001285423_14_+_1 |
| Cacnb4        | -0.646 | -0.699 | -2.046 | -2.697 | -3.167 | -3.164 | -2.638 | -3.470 | -3.640 | -3.745 | 12298  | CACNB4   | NM_001285426_2_-_1  |
| Cacnb4        | -3.455 | -3.494 | -4.262 | -4.650 | 0.830  | 2.221  | -0.292 | -1.993 | -4.437 | -4.395 | 12298  | CACNB4   | NM_001285427_2_-_1  |
| Cacnb4        | 1.821  | 1.619  | 0.518  | 0.097  | -1.669 | -2.840 | -0.418 | -0.566 | -2.564 | -1.775 | 12298  | CACNB4   | NM_001285428_2_-_1  |
| Eef1d         | -0.942 | -0.803 | -1.298 | 0.168  | -0.600 | -4.509 | -0.157 | -0.460 | -0.144 | -0.401 | 66656  | EEF1D    | NM_001285429_15_-_1 |
| Eef1d         | 3.882  | 3.125  | 2.349  | 2.627  | 1.675  | 1.829  | 1.161  | 1.887  | 0.457  | 1.831  | 66656  | EEF1D    | NM_001285430_15_-_1 |
| Eef1d         | -3.464 | 0.783  | -1.438 | -1.166 | -4.596 | -0.215 | -2.385 | -1.862 | -2.601 | -3.774 | 66656  | EEF1D    | NM_001285431_15_-_1 |
| Eef1d         | 6.194  | 6.160  | 5.730  | 5.882  | 5.402  | 5.516  | 5.440  | 5.639  | 4.701  | 4.682  | 66656  | EEF1D    | NM_001285432_15_-_1 |
| Eef1d         | 2.619  | 1.592  | 1.934  | 1.600  | 1.100  | 1.723  | 1.151  | -0.088 | 0.314  | 0.860  | 66656  | EEF1D    | NM_001285433_15_-_1 |
| Eef1d         | 0.175  | 1.268  | -0.219 | 0.822  | 0.242  | 0.039  | 0.529  | 0.661  | 0.527  | -0.669 | 66656  | EEF1D    | NM_001285434_15_-_1 |
| Adamtsl5      | -4.981 | -2.600 | -4.975 | -3.145 | -4.942 | -4.102 | -4.590 | -3.647 | -4.981 | -4.981 | 66548  | ADAMTSL5 | NM_001285435_10_-_1 |
| Rangrf        | -4.981 | -4.981 | -4.981 | -4.981 | -4.951 | -4.951 | -4.981 | -4.981 | -4.950 | -4.956 | 57785  | RANGRF   | NM_001285441_11_-_1 |
| Rangrf        | -2.162 | -4.981 | -3.438 | -2.696 | -4.422 | -3.454 | -4.118 | -3.170 | -4.835 | -4.975 | 57785  | RANGRF   | NM_001285442_11_-_1 |
| Rangrf        | -4.981 | -4.981 | -3.815 | -4.935 | -4.972 | -4.979 | -4.899 | -4.973 | -4.811 | -4.955 | 57785  | RANGRF   | NM_001285443_11_-_1 |
| Cbfa2t2       | 1.170  | -2.574 | -3.194 | -2.817 | -3.529 | -4.114 | -2.640 | -4.645 | -1.118 | -2.572 | 12396  | CBFA2T2  | NM_001285446_2_+_1  |
| Tmem33        | 3.721  | 4.169  | 3.587  | 3.507  | 2.828  | 3.359  | 3.294  | 3.929  | 2.897  | 3.820  | 67878  | TMEM33   | NM_001285452_5_+_1  |
| Bad           | 5.485  | 5.578  | 4.634  | 4.661  | 3.969  | 4.183  | 4.372  | 4.642  | 4.728  | 4.755  | 12015  | BAD      | NM_001285453_19_+_1 |
| Gfra1         | -3.668 | -4.981 | -4.608 | -4.314 | -4.957 | -4.957 | -4.947 | -4.798 | -4.981 | -4.981 | 14585  | GFRA1    | NM_001285457_19_-_1 |
| Fmn1          | -4.981 | -4.981 | -4.981 | -4.981 | -4.948 | -3.655 | -4.959 | -4.944 | -4.981 | -4.981 | 14260  | FMN1     | NM_001285458_2_+_1  |
| Fmn1          | -2.073 | -4.981 | 3.637  | 3.703  | 3.271  | 4.270  | 2.624  | 4.096  | 2.386  | 4.694  | 14260  | FMN1     | NM_001285459_2_+_1  |
| Carf          | -4.541 | -1.858 | -2.083 | -0.896 | -0.362 | 0.605  | -2.659 | -2.490 | -1.858 | -0.094 | 241066 | CARF     | NM_001285463_1_+_1  |
| Dennd6a       | -4.457 | -4.088 | -4.749 | -4.895 | -4.848 | -3.013 | -3.571 | -4.886 | -2.052 | -4.737 | 211922 | DENND6A  | NM_001285466_14_+_1 |
| Dennd6a       | -4.396 | -1.429 | -4.698 | -4.873 | -3.472 | -4.905 | -4.658 | -4.951 | -4.608 | -4.692 | 211922 | DENND6A  | NM_001285467_14_+_1 |

|          |        |        |        |        |        |        |        |        |        |        |        |          |                     |
|----------|--------|--------|--------|--------|--------|--------|--------|--------|--------|--------|--------|----------|---------------------|
| Carf     | 0.859  | -4.108 | -0.779 | -0.759 | -2.099 | -0.747 | 0.475  | 0.155  | 0.845  | 1.002  | 241066 | CARF     | NM_001285473_1_+_1  |
| Hp1bp3   | 2.244  | 1.986  | 1.711  | 2.388  | 2.069  | 2.271  | 1.038  | 1.032  | 2.194  | 2.212  | 15441  | HP1BP3   | NM_001285478_4_+_1  |
| Hp1bp3   | 2.792  | 2.830  | 2.034  | 2.633  | 2.263  | 1.868  | 1.634  | 2.311  | 2.296  | 1.298  | 15441  | HP1BP3   | NM_001285479_4_+_1  |
| Hp1bp3   | 0.943  | -1.528 | -2.815 | -4.827 | -4.580 | -1.831 | -1.019 | -1.404 | -0.002 | -0.336 | 15441  | HP1BP3   | NM_001285480_4_+_1  |
| Hp1bp3   | 3.112  | 2.838  | 2.562  | 3.300  | 2.758  | 2.549  | 2.383  | 2.136  | 1.961  | 2.204  | 15441  | HP1BP3   | NM_001285481_4_+_1  |
| Mknk1    | 2.547  | 2.209  | 1.539  | 2.789  | 0.871  | 1.912  | 1.143  | 1.605  | 3.176  | 3.256  | 17346  | MKNK1    | NM_001285487_4_+_1  |
| Mknk1    | -3.164 | -0.350 | -0.512 | -0.283 | -3.950 | -2.414 | -1.697 | -1.693 | 0.310  | 0.894  | 17346  | MKNK1    | NM_001285488_4_+_1  |
| Nap1l4   | 6.045  | 6.193  | 6.600  | 6.562  | 6.962  | 6.946  | 6.548  | 6.458  | 6.301  | 6.057  | 17955  | NAP1L4   | NM_001285489_7_-_1  |
| Nap1l4   | 0.564  | -0.113 | 1.018  | 1.255  | 1.154  | 1.466  | 1.292  | -2.598 | 1.717  | -0.731 | 17955  | NAP1L4   | NM_001285490_7_-_1  |
| Gnb1l    | -1.770 | -3.543 | -4.438 | -0.713 | -0.787 | -0.454 | -2.583 | -2.164 | -1.182 | -4.887 | 13972  | GNB1L    | NM_001285491_16_+_1 |
| Gnb1l    | -4.888 | -2.245 | -2.835 | -4.722 | -4.822 | -2.002 | -4.757 | -3.410 | -2.547 | -4.981 | 13972  | GNB1L    | NM_001285493_16_+_1 |
| Gnb1l    | -4.753 | -1.983 | -3.615 | -4.849 | -4.897 | -4.964 | -3.191 | -4.816 | -4.725 | -4.925 | 13972  | GNB1L    | NM_001285494_16_+_1 |
| Mpl      | -4.607 | -4.981 | -4.259 | -4.790 | -4.972 | -4.964 | -1.659 | -3.354 | -2.523 | -1.310 | 17480  | MPL      | NM_001285496_4_-_1  |
| Mpl      | -2.091 | -3.408 | -3.429 | -3.461 | -3.692 | -3.506 | -3.124 | -3.492 | -4.845 | -3.032 | 17480  | MPL      | NM_001285497_4_-_1  |
| Tead2    | -4.367 | -4.074 | -4.450 | -4.836 | -4.872 | -4.961 | -4.688 | -4.910 | -4.554 | -4.832 | 21677  | TEAD2    | NM_001285498_7_+_1  |
| Tead2    | -0.426 | -0.367 | -1.329 | -1.467 | -1.785 | -1.596 | -0.980 | -2.525 | -0.544 | -1.990 | 21677  | TEAD2    | NM_001285500_7_+_1  |
| Nde1     | 2.607  | 2.016  | 3.100  | 3.025  | 3.138  | 3.334  | 2.851  | 2.645  | 2.881  | 3.015  | 67203  | NDE1     | NM_001285503_16_+_1 |
| Nde1     | 0.928  | 0.273  | -0.286 | -3.895 | -0.970 | -1.341 | -2.203 | -0.988 | 0.629  | -0.237 | 67203  | NDE1     | NM_001285504_16_+_1 |
| Rps6ka1  | -1.872 | 1.199  | -1.882 | -0.125 | -1.190 | 0.099  | -0.700 | -1.364 | 0.060  | -3.985 | 20111  | RPS6KA1  | NM_001285505_4_-_1  |
| Rps6ka1  | 7.724  | 7.960  | 6.965  | 6.778  | 7.810  | 7.569  | 7.660  | 7.591  | 8.695  | 8.446  | 20111  | RPS6KA1  | NM_001285506_4_-_1  |
| Cops2    | 4.836  | 4.797  | 4.662  | 4.398  | 4.060  | 3.498  | 4.130  | 4.373  | 3.812  | 4.238  | 12848  | NA       | NM_001285507_2_-_1  |
| Cnot6l   | 3.834  | 4.484  | 3.575  | -0.062 | 3.631  | 3.888  | 3.676  | 2.837  | 3.242  | 3.102  | 231464 | CNOT6L   | NM_001285511_5_-_1  |
| Cops2    | -4.320 | -0.119 | -0.888 | -0.923 | -0.208 | -0.996 | -1.540 | -0.440 | -4.129 | 0.681  | 12848  | NA       | NM_001285512_2_-_1  |
| Cops2    | -1.816 | -1.843 | -2.048 | -0.333 | -0.540 | -3.286 | -2.596 | -1.401 | -1.128 | -2.388 | 12848  | NA       | NM_001285513_2_-_1  |
| Cnot6l   | 1.773  | 2.667  | 0.573  | -0.262 | 1.215  | 1.637  | 1.384  | 2.087  | 1.788  | 2.003  | 231464 | CNOT6L   | NM_001285514_5_-_1  |
| Nr1h2    | 4.096  | 4.395  | 5.398  | 5.283  | 5.033  | 5.091  | 4.794  | 4.529  | 5.159  | 5.056  | 22260  | NR1H2    | NM_001285517_7_-_1  |
| Nr1h2    | 3.000  | 3.997  | 3.926  | 4.297  | 3.222  | 3.694  | 3.671  | 4.196  | 4.663  | 4.527  | 22260  | NR1H2    | NM_001285518_7_-_1  |
| Nr1h2    | 4.031  | 3.575  | 3.404  | 4.085  | 3.929  | 3.866  | 3.703  | 3.572  | 4.584  | 4.285  | 22260  | NR1H2    | NM_001285519_7_-_1  |
| St3gal3  | -1.577 | 1.683  | -0.277 | 0.699  | 0.536  | 0.485  | -0.877 | -0.323 | 1.136  | 1.442  | 20441  | ST3GAL3  | NM_001285520_4_-_1  |
| St3gal3  | -0.098 | -1.020 | 0.173  | 0.001  | -2.643 | -1.627 | -0.224 | -1.869 | -4.313 | -1.731 | 20441  | ST3GAL3  | NM_001285521_4_-_1  |
| Tle1     | 0.376  | -0.136 | 0.665  | -0.423 | -0.277 | -1.175 | 1.330  | -2.767 | 1.337  | 0.999  | 21885  | TLE1     | NM_001285529_4_-_1  |
| Tle1     | -0.029 | -3.876 | 0.034  | -1.657 | -0.621 | -0.578 | -0.131 | -0.147 | 0.697  | 1.187  | 21885  | TLE1     | NM_001285530_4_-_1  |
| Tle1     | 4.055  | 3.902  | 3.618  | 3.264  | 2.940  | 2.891  | 3.885  | 3.961  | 3.861  | 4.149  | 21885  | TLE1     | NM_001285531_4_-_1  |
| Tle1     | 1.237  | 1.813  | 0.797  | 0.336  | -0.202 | -1.439 | 0.351  | -0.222 | 1.551  | 1.396  | 21885  | TLE1     | NM_001285532_4_-_1  |
| Serpinh1 | -3.690 | 1.536  | -3.964 | -4.948 | -4.969 | -4.950 | -4.856 | -4.914 | -4.874 | -4.981 | 12406  | SERPINH1 | NM_001285776_7_-_1  |
| Gls2     | -4.981 | -1.869 | -2.895 | -3.745 | -3.571 | -3.151 | -3.326 | -3.860 | -1.788 | -4.981 | 216456 | GLS2     | NM_001285777_10_+_1 |
| Gls2     | -4.981 | -4.340 | -4.735 | -4.619 | -4.865 | -4.948 | -4.506 | -3.685 | -4.715 | -4.981 | 216456 | GLS2     | NM_001285779_10_+_1 |
| Thoc7    | 1.324  | 2.566  | 2.660  | 2.282  | 1.985  | 2.790  | 1.585  | 1.733  | 0.259  | 1.476  | 66231  | THOC7    | NM_001285780_14_-_1 |
| Pars2    | -1.651 | -1.969 | -0.770 | -2.207 | -2.499 | -2.126 | -2.284 | -2.759 | -2.095 | -1.923 | 230577 | PARS2    | NM_001285783_4_+_1  |
| Pars2    | -1.428 | 0.969  | 0.003  | 0.615  | -1.198 | 0.731  | -2.510 | -3.131 | -1.013 | -1.091 | 230577 | PARS2    | NM_001285784_4_+_1  |
| Arhgap9  | 0.403  | 0.381  | 3.685  | 4.438  | 6.950  | 7.093  | 4.795  | 4.443  | 0.330  | 0.866  | 216445 | ARHGAP9  | NM_001285785_10_+_1 |
| Ildr1    | -4.981 | -4.981 | 3.262  | 2.814  | -2.698 | -1.736 | -1.993 | -4.206 | -2.079 | -4.758 | 106347 | ILDR1    | NM_001285788_16_+_1 |
| Ildr1    | -4.981 | -4.981 | 0.542  | -0.238 | -0.745 | -0.382 | -1.684 | -2.809 | -2.053 | -2.828 | 106347 | ILDR1    | NM_001285791_16_+_1 |
| Wnt11    | -4.981 | -4.981 | -2.700 | -4.929 | -1.636 | -0.688 | 0.534  | -3.528 | -1.897 | -2.160 | 22411  | WNT11    | NM_001285792_7_+_1  |
| B4galt4  | -3.893 | 2.229  | 2.947  | 3.008  | 1.277  | -0.059 | 2.070  | 1.216  | 1.709  | 0.590  | 56375  | B4GALT4  | NM_001285793_16_+_1 |
| Wnt11    | -4.981 | -4.981 | -2.461 | -2.701 | 0.642  | -1.461 | -0.344 | -1.795 | -4.858 | -3.080 | 22411  | WNT11    | NM_001285794_7_+_1  |
| Wnt11    | -4.981 | -4.981 | -1.561 | -2.655 | -1.595 | -1.912 | -0.342 | -3.055 | -3.284 | -3.855 | 22411  | WNT11    | NM_001285795_7_+_1  |
| Zfp27    | 0.342  | -1.490 | -1.608 | -0.147 | -0.224 | -3.414 | -1.028 | -3.970 | -1.532 | -4.784 | 22689  | ZNF585A  | NM_001285797_7_-_1  |
| Zfp27    | -1.316 | -2.133 | -2.883 | -1.431 | -1.907 | -0.902 | -1.334 | -0.532 | -1.641 | -4.796 | 22689  | ZNF585A  | NM_001285798_7_-_1  |
| Polr1e   | -4.793 | -0.795 | -4.809 | -3.321 | -4.940 | -3.673 | -4.845 | -4.963 | -4.820 | -4.963 | 64424  | POLR1E   | NM_001285800_4_+_1  |
| Chchd7   | 0.144  | -1.019 | -1.519 | -0.757 | -2.124 | -1.872 | -0.604 | -1.722 | -0.374 | -2.572 | 66433  | CHCHD7   | NM_001285804_4_+_1  |
| Zbtb20   | 3.325  | 2.991  | 2.644  | 2.812  | 3.424  | 2.629  | 2.635  | 2.362  | 2.357  | 2.815  | 56490  | ZBTB20   | NM_001285805_16_+_1 |
| Grk3     | 3.809  | -3.684 | 5.219  | 2.860  | 6.680  | 4.875  | 6.571  | 4.177  | 5.252  | 3.044  | 320129 | GRK3     | NM_001285806_5_-_1  |
| Tmem53   | -4.893 | -4.729 | -4.980 | -4.980 | -4.981 | -4.980 | -4.960 | -4.979 | -3.328 | -4.933 | 68777  | TMEM53   | NM_001285812_4_+_1  |
| Tmem53   | -4.981 | -4.846 | -4.981 | -4.981 | -4.981 | -4.981 | -4.981 | -4.981 | -4.965 | -4.968 | 68777  | TMEM53   | NM_001285814_4_+_1  |
| Tmem53   | -4.981 | -4.862 | -4.981 | -4.981 | -4.981 | -4.981 | -4.981 | -4.981 | -4.968 | -4.971 | 68777  | TMEM53   | NM_001285815_4_+_1  |
| Tmem53   | -2.812 | -2.564 | -4.981 | -4.978 | -4.959 | -4.328 | -4.193 | -4.927 | -4.960 | -3.583 | 68777  | TMEM53   | NM_001285816_4_+_1  |
| Snrpa    | 4.138  | 3.977  | 4.650  | 4.438  | 4.342  | 3.835  | 3.763  | 3.750  | 3.474  | 3.430  | 53607  | NA       | NM_001285825_7_-_1  |
| Ppil3    | 1.213  | 1.995  | 1.188  | 0.386  | 1.413  | 1.350  | 0.325  | -0.008 | 0.598  | 0.625  | 70225  | PPIL3    | NM_001285826_1_-_1  |
| Ppil3    | 4.538  | 5.039  | 4.296  | 4.316  | 4.363  | 4.264  | 4.170  | 3.930  | 3.254  | 3.526  | 70225  | PPIL3    | NM_001285827_1_-_1  |
| Far1     | -0.731 | -3.916 | 1.656  | 0.891  | -1.541 | -0.237 | 0.346  | -0.707 | 1.133  | 0.990  | 67420  | FAR1     | NM_001285831_7_+_1  |
| Osgpl1   | 3.966  | 3.980  | 3.355  | 3.227  | 3.300  | 3.412  | 3.441  | 3.425  | 2.506  | 2.696  | 72085  | OSGEPL1  | NM_001285839_1_+_1  |
| Paqr7    | -4.288 | -3.920 | -4.401 | -4.836 | -1.246 | -4.022 | -3.561 | -4.877 | -0.667 | -4.781 | 71904  | PAQR7    | NM_001285845_4_+_1  |
| Paqr7    | -3.994 | -3.551 | -4.222 | -4.737 | -4.864 | -4.941 | -4.490 | -4.291 | -4.105 | -0.999 | 71904  | PAQR7    | NM_001285846_4_+_1  |
| Paqr7    | -3.721 | 0.013  | -1.624 | -0.159 | -1.924 | -0.338 | -2.190 | -0.497 | 1.740  | 1.039  | 71904  | PAQR7    | NM_001285847_4_+_1  |
| Paqr7    | -2.468 | 0.251  | -1.343 | -2.476 | -4.629 | -1.693 | -1.986 | -3.352 | 1.058  | -0.786 | 71904  | PAQR7    | NM_001285849_4_+_1  |
| Sgip1    | -4.936 | -4.708 | -4.918 | -4.968 | -4.936 | -4.980 | -4.864 | -4.968 | -4.981 | -4.975 | 73094  | SGIP1    | NM_001285852_4_+_1  |
| Matk     | 3.179  | 2.907  | 4.183  | 4.047  | 3.894  | 4.687  | 4.433  | 4.455  | 3.438  | 3.020  | 17179  | MATK     | NM_001285853_10_+_1 |
| Matk     | 5.119  | 5.245  | 6.015  | 5.969  | 6.511  | 6.915  | 6.552  | 6.512  | 5.017  | 5.392  | 17179  | MATK     | NM_001285854_10_+_1 |
| Matk     | -4.312 | -4.100 | -4.499 | -4.773 | -4.804 | -4.939 | -3.188 | -4.923 | -4.582 | -1.909 | 17179  | MATK     | NM_001285855_10_+_1 |
| Sgip1    | -4.551 | -3.744 | -3.402 | -4.785 | -3.361 | -4.879 | -4.410 | -4.781 | -4.981 | -4.831 | 73094  | SGIP1    | NM_001285859_4_+_1  |
| Sgip1    | -4.358 | -3.321 | -4.259 | -4.603 | -3.936 | -4.780 | -4.192 | -4.599 | -4.981 | -4.750 | 73094  | SGIP1    | NM_001285860_4_+_1  |
| Sgip1    | -2.465 | -1.411 | -2.021 | -2.513 | -1.440 | -1.613 | -1.607 | -1.428 | -4.981 | -4.456 | 73094  | SGIP1    | NM_001285862_4_+_1  |
| Pphln1   | 0.105  | -3.500 | -0.793 | 0.162  | -0.221 | -2.139 | -0.561 | -1.371 | -1.474 | -1.323 | 223828 | PPHLN1   | NM_001285863_15_+_1 |

|               |        |        |        |        |        |        |        |        |        |        |        |          |                     |
|---------------|--------|--------|--------|--------|--------|--------|--------|--------|--------|--------|--------|----------|---------------------|
| Pphln1        | -3.376 | -1.723 | 0.346  | -2.216 | -2.174 | -0.466 | -2.727 | -4.753 | 0.619  | -3.732 | 223828 | PPHLN1   | NM_001285864_15_+_1 |
| C77080        | -3.821 | -3.676 | -4.449 | -4.900 | -4.624 | -4.894 | -4.535 | -4.858 | -4.150 | -4.617 | 97130  | KIAA1522 | NM_001285865_4_-_1  |
| C77080        | -3.638 | -3.458 | -4.304 | -4.872 | -4.526 | -4.861 | -4.435 | -4.811 | -4.040 | -4.538 | 97130  | KIAA1522 | NM_001285866_4_-_1  |
| C77080        | -2.071 | -1.472 | -2.286 | -3.657 | -1.279 | -1.977 | -2.569 | -2.388 | -1.800 | -2.882 | 97130  | KIAA1522 | NM_001285867_4_-_1  |
| Trim3         | 4.359  | 4.059  | 3.314  | 3.451  | 1.712  | 2.043  | 3.256  | 3.641  | 4.610  | 5.078  | 55992  | TRIM3    | NM_001285870_7_-_1  |
| Trim3         | -1.111 | -0.431 | -2.194 | -4.876 | -2.585 | -4.888 | -2.535 | -3.368 | -0.255 | -1.149 | 55992  | TRIM3    | NM_001285871_7_-_1  |
| Pafah2        | -3.159 | -3.262 | -4.588 | -4.804 | -4.516 | -4.814 | -4.302 | -4.355 | -3.440 | -3.999 | 100163 | PAFAH2   | NM_001285872_4_+_1  |
| Trim3         | -1.194 | -1.887 | -1.603 | -2.562 | -4.430 | -3.675 | -4.927 | -2.669 | -4.981 | -1.039 | 55992  | TRIM3    | NM_001285873_7_-_1  |
| Pafah2        | 0.163  | -0.988 | -2.643 | -1.822 | -1.629 | -1.150 | -2.213 | -0.838 | 0.569  | 0.052  | 100163 | PAFAH2   | NM_001285874_4_+_1  |
| Pafah2        | -3.722 | -4.110 | -2.889 | -4.902 | -3.605 | -4.348 | -4.456 | -3.856 | -4.608 | -1.985 | 100163 | PAFAH2   | NM_001285875_4_+_1  |
| Pafah2        | -1.343 | -1.335 | -1.663 | -2.296 | -2.169 | -4.934 | -0.472 | -4.864 | 0.113  | -1.424 | 100163 | PAFAH2   | NM_001285877_4_+_1  |
| D630023F18Rik | -4.981 | -4.981 | -4.056 | -4.973 | -4.714 | -3.894 | -4.863 | -4.671 | -2.045 | -2.946 | 98303  | C2orf80  | NM_001285881_1_-_1  |
| D630023F18Rik | -4.981 | -4.981 | -2.706 | -3.956 | -2.728 | -4.299 | -0.800 | -3.803 | -1.140 | -2.404 | 98303  | C2orf80  | NM_001285882_1_-_1  |
| Med15         | -3.843 | -0.769 | -0.210 | -1.705 | -1.588 | -2.411 | -1.228 | -2.334 | 1.266  | -0.499 | 94112  | NA       | NM_001285884_16_-_1 |
| Zmym6         | 3.259  | 3.430  | 2.110  | 2.079  | 2.761  | 2.660  | 2.863  | 2.782  | 3.447  | 3.850  | 100177 | ZMYM6    | NM_001285885_4_+_1  |
| Med15         | 0.323  | -3.786 | 0.799  | 1.387  | 0.884  | 1.084  | 1.960  | 1.461  | 2.683  | 2.220  | 94112  | NA       | NM_001285886_16_-_1 |
| Zmym6         | 2.931  | 1.606  | 1.369  | -0.678 | -0.165 | -0.498 | 1.456  | -0.913 | -1.056 | -0.725 | 100177 | ZMYM6    | NM_001285887_4_+_1  |
| Zmym6         | -2.805 | -3.394 | -2.757 | -4.366 | -3.381 | -3.281 | -2.290 | -4.758 | -2.005 | -4.122 | 100177 | ZMYM6    | NM_001285888_4_+_1  |
| Pde1b         | 0.921  | 0.511  | 5.224  | 5.954  | 1.377  | 1.733  | 1.415  | 1.471  | -3.605 | -4.365 | 18574  | PDE1B    | NM_001285890_15_+_1 |
| Sae1          | -1.516 | -2.705 | -2.095 | -1.596 | -3.074 | -2.832 | -2.756 | -3.567 | -1.506 | -2.672 | 56459  | SAE1     | NM_001285891_7_-_1  |
| Sae1          | -0.333 | 0.043  | -2.714 | -2.080 | -2.103 | -3.214 | -1.279 | -1.956 | -3.706 | -0.974 | 56459  | SAE1     | NM_001285892_7_-_1  |
| Vps8          | 4.123  | 4.013  | 3.405  | 3.585  | 3.046  | 3.324  | 3.671  | 4.132  | 5.022  | 5.099  | 209018 | VPS8     | NM_001285893_16_+_1 |
| Vps8          | -3.563 | -3.966 | -3.458 | -4.512 | -2.435 | -2.313 | -0.712 | -2.700 | -1.754 | -0.540 | 209018 | VPS8     | NM_001285894_16_+_1 |
| Calr4         | -0.819 | 0.028  | -3.475 | -4.982 | -4.981 | -4.976 | -4.398 | -4.980 | -4.514 | -3.921 | 108802 | NA       | NM_001285895_4_+_1  |
| Calr4         | -2.252 | -1.442 | -4.336 | -4.989 | -4.981 | -4.980 | -4.809 | -4.979 | -4.644 | -4.501 | 108802 | NA       | NM_001285896_4_+_1  |
| Calr4         | -4.730 | -4.501 | -4.962 | -4.980 | -4.981 | -4.981 | -4.980 | -4.981 | -4.974 | -4.967 | 108802 | NA       | NM_001285897_4_+_1  |
| Calr4         | -4.745 | -4.521 | -4.963 | -4.980 | -4.981 | -4.981 | -4.981 | -4.981 | -4.975 | -4.969 | 108802 | NA       | NM_001285898_4_+_1  |
| Eri3          | 1.315  | 1.589  | -0.014 | -0.013 | 0.112  | -0.412 | 0.181  | -0.257 | 1.133  | 0.822  | 140546 | ERI3     | NM_001285899_4_+_1  |
| Eri3          | 5.515  | 5.680  | 4.221  | 4.209  | 4.418  | 4.114  | 4.198  | 4.305  | 4.120  | 3.958  | 140546 | ERI3     | NM_001285901_4_+_1  |
| Eri3          | 4.045  | 4.139  | 2.415  | 1.288  | 2.873  | 2.918  | 2.831  | 2.007  | 2.065  | 0.393  | 140546 | ERI3     | NM_001285902_4_+_1  |
| Pih1d1        | -4.285 | -3.831 | -2.777 | -4.595 | -4.750 | -4.943 | -1.738 | -4.866 | -4.605 | -4.885 | 68845  | PIH1D1   | NM_001285904_7_+_1  |
| Cd2bp2        | 1.035  | 0.537  | 2.541  | 1.858  | 2.633  | 2.544  | 2.772  | 1.894  | 2.247  | 2.736  | 70233  | CD2BP2   | NM_001285905_7_-_1  |
| Cd2bp2        | 1.582  | 0.037  | 1.065  | 1.728  | 1.138  | 1.278  | 1.830  | 1.666  | 1.359  | -0.483 | 70233  | CD2BP2   | NM_001285906_7_-_1  |
| Cd2bp2        | -0.965 | -0.947 | 0.786  | 0.289  | 0.006  | 1.431  | 1.793  | 0.225  | 0.981  | -0.066 | 70233  | CD2BP2   | NM_001285907_7_-_1  |
| Gng2          | 2.699  | 3.640  | 2.888  | 2.393  | 1.999  | 1.915  | 1.839  | 1.118  | 2.425  | 1.832  | 14702  | GNG2     | NM_001285908_14_-_1 |
| Gng2          | -4.431 | -4.167 | -3.413 | -4.903 | -4.850 | -3.762 | -4.610 | -4.958 | -0.724 | -4.639 | 14702  | GNG2     | NM_001285909_14_-_1 |
| Gng2          | -0.767 | -1.499 | 0.115  | -0.645 | -1.451 | -1.803 | -0.740 | -0.640 | 0.248  | 0.558  | 14702  | GNG2     | NM_001285910_14_-_1 |
| Gng2          | 0.784  | -0.707 | 1.094  | -2.375 | 0.512  | -1.498 | -0.068 | -4.220 | -2.307 | -0.802 | 14702  | GNG2     | NM_001285911_14_-_1 |
| Dapk1         | -4.981 | 0.158  | 0.041  | 0.859  | -1.587 | 0.252  | -0.648 | 1.650  | 0.976  | 2.928  | 69635  | DAPK1    | NM_001285917_13_+_1 |
| Mfn2          | -2.201 | -3.116 | -4.089 | -4.609 | -4.451 | -4.898 | -0.206 | -4.896 | -4.155 | -4.365 | 170731 | MFN2     | NM_001285920_4_-_1  |
| Mfn2          | -1.356 | -2.957 | -1.549 | -4.570 | -4.212 | -4.877 | -3.326 | -4.886 | -1.101 | -4.280 | 170731 | MFN2     | NM_001285921_4_-_1  |
| Mfn2          | 2.027  | 2.287  | 1.754  | 2.198  | 1.438  | 0.343  | 1.635  | -0.491 | 2.652  | 3.090  | 170731 | MFN2     | NM_001285922_4_-_1  |
| Mfn2          | 2.027  | 1.568  | 0.933  | 1.266  | 1.577  | 1.215  | 1.795  | 1.149  | 1.781  | 1.666  | 170731 | MFN2     | NM_001285923_4_-_1  |
| Dock10        | 7.199  | 7.011  | 7.894  | 7.487  | 9.168  | 8.935  | 8.472  | 7.922  | 7.003  | 6.198  | 210293 | DOCK10   | NM_001285927_1_-_1  |
| Dhx34         | 0.733  | 0.733  | -2.641 | -0.796 | 0.546  | 1.852  | -1.389 | 1.200  | -0.090 | 1.443  | 71723  | DHX34    | NM_001285931_7_-_1  |
| Dhx34         | -0.251 | -3.637 | -0.177 | -1.675 | 2.770  | 1.995  | 1.713  | 0.871  | 1.002  | -4.224 | 71723  | DHX34    | NM_001285932_7_-_1  |
| Kctd9         | 0.157  | -0.047 | 0.387  | 0.203  | 0.145  | 0.279  | 0.776  | -0.198 | 1.124  | 0.638  | 105440 | KCTD9    | NM_001285933_14_+_1 |
| Zdbf2         | -4.981 | -4.981 | -4.983 | -4.644 | -4.980 | -4.944 | -4.981 | -4.981 | -4.981 | -4.981 | 73884  | ZDBF2    | NM_001285936_1_+_1  |
| Zdbf2         | -4.981 | -4.981 | -4.986 | -4.413 | -4.979 | -4.927 | -4.981 | -4.981 | -4.981 | -4.981 | 73884  | ZDBF2    | NM_001285937_1_+_1  |
| Fez2          | -2.047 | -1.917 | -2.076 | -2.227 | -2.102 | -1.368 | -1.295 | -2.484 | -0.506 | -2.428 | 225020 | FEZ2     | NM_001285940_17_-_1 |
| Eif3k         | 0.204  | -2.043 | -1.131 | -1.779 | -2.759 | -2.180 | -1.393 | -2.949 | -4.981 | -2.086 | 73830  | EIF3K    | NM_001285942_7_-_1  |
| Eif3k         | -4.981 | -1.799 | -1.698 | -2.580 | -4.097 | -4.780 | -3.908 | -2.572 | -2.541 | -2.774 | 73830  | EIF3K    | NM_001285943_7_-_1  |
| Zranb3        | 0.552  | 0.209  | 0.012  | 0.969  | -2.224 | 2.265  | 0.089  | 3.054  | 0.214  | 1.072  | 226409 | ZRANB3   | NM_001285945_1_-_1  |
| Fez2          | -4.981 | -2.465 | -4.258 | -4.165 | -3.724 | -4.844 | -4.907 | -4.903 | -2.709 | -2.917 | 225020 | FEZ2     | NM_001285946_17_-_1 |
| Cyp39a1       | -4.981 | -4.981 | -3.435 | -3.647 | -3.113 | -3.287 | -3.632 | -3.224 | -4.925 | -4.824 | 56050  | CYP39A1  | NM_001285947_17_+_1 |
| Cyp39a1       | -3.027 | -4.981 | -3.601 | -4.424 | -3.587 | -2.144 | -0.943 | -4.771 | -0.444 | -0.749 | 56050  | CYP39A1  | NM_001285948_17_+_1 |
| Fez2          | -3.587 | -4.981 | -4.967 | -4.967 | -4.951 | -4.625 | -4.657 | -4.726 | -4.981 | -4.981 | 225020 | FEZ2     | NM_001285949_17_-_1 |
| 1700024P16Rik | 1.221  | 1.571  | -4.973 | -4.922 | -4.980 | -4.970 | -4.978 | -4.978 | -4.981 | -4.897 | 242594 | C1orf168 | NM_001285952_4_+_1  |
| 1700024P16Rik | -3.327 | 2.721  | -4.967 | -3.532 | -4.979 | -3.983 | -4.477 | -3.571 | -4.981 | -4.454 | 242594 | C1orf168 | NM_001285953_4_+_1  |
| Lyrn1         | 0.775  | 2.645  | 2.072  | 1.475  | 0.728  | 0.873  | 1.396  | 1.187  | 1.692  | 1.385  | 73919  | LYRM1    | NM_001285959_7_+_1  |
| Lyrn1         | 2.966  | 2.215  | 1.247  | 0.594  | 0.815  | 0.563  | 0.792  | 0.104  | 1.548  | 1.747  | 73919  | LYRM1    | NM_001285960_7_+_1  |
| Lyrn1         | 0.282  | 1.566  | 1.002  | 1.319  | -1.168 | 0.635  | -0.022 | -0.035 | -1.622 | 1.075  | 73919  | LYRM1    | NM_001285961_7_+_1  |
| Skp2          | -4.180 | -3.385 | -1.129 | -4.515 | -1.285 | -4.892 | -2.007 | -3.593 | -1.208 | -4.586 | 27401  | SKP2     | NM_001285980_15_-_1 |
| Banp          | 1.271  | 2.036  | 1.508  | 1.233  | 2.658  | 2.996  | 2.375  | 2.075  | 1.849  | 2.159  | 53325  | BANP     | NM_001285981_8_+_1  |
| Fam173a       | 1.201  | 0.723  | 0.818  | -0.159 | 0.195  | 0.348  | 1.046  | -0.062 | -0.201 | -0.399 | 214917 | FAM173A  | NM_001285982_17_-_1 |
| Banp          | 1.652  | 2.044  | 1.746  | 1.577  | 3.120  | 2.980  | 2.950  | 2.447  | 1.275  | 2.200  | 53325  | BANP     | NM_001285983_8_+_1  |
| Fam173a       | 1.201  | 0.723  | 0.818  | -0.159 | 0.195  | 0.348  | 1.046  | -0.062 | -0.201 | -0.399 | 214917 | FAM173A  | NM_001285984_17_-_1 |
| Cdc27         | 0.271  | 1.097  | 1.124  | -0.124 | 1.489  | 1.537  | -0.281 | 0.913  | 1.684  | 2.541  | 217232 | CDC27    | NM_001285988_11_-_1 |
| Cdc27         | 3.446  | 2.060  | 2.820  | 3.511  | 3.366  | 3.119  | 2.905  | 3.298  | 2.956  | 2.846  | 217232 | CDC27    | NM_001285989_11_-_1 |
| Cdc27         | -2.480 | 0.926  | -1.204 | -0.521 | -0.014 | 0.080  | -0.267 | -1.154 | 0.619  | -0.732 | 217232 | CDC27    | NM_001285990_11_-_1 |
| Tbc1d5        | 1.027  | 0.390  | 1.596  | 0.202  | 1.186  | -0.217 | -0.504 | 0.759  | 0.866  | -0.208 | 72238  | TBC1D5   | NM_001285991_17_-_1 |
| Scoc          | 0.941  | 1.383  | 0.829  | 0.814  | -1.697 | -0.150 | 0.256  | 0.164  | 0.320  | 0.299  | 56367  | SCOC     | NM_001285992_8_-_1  |
| Tbc1d5        | -4.122 | -3.866 | -4.237 | -3.261 | -3.301 | -4.966 | -4.467 | -3.038 | -2.685 | -3.613 | 72238  | TBC1D5   | NM_001285993_17_-_1 |
| Enpp2         | -3.570 | -3.806 | -4.289 | -4.326 | -4.167 | -0.816 | -4.063 | -4.587 | -4.223 | -4.917 | 18606  | ENPP2    | NM_001285994_15_-_1 |

|          |        |        |        |        |        |        |        |        |        |        |        |          |                    |
|----------|--------|--------|--------|--------|--------|--------|--------|--------|--------|--------|--------|----------|--------------------|
| Enpp2    | -4.505 | -4.275 | -4.604 | -4.699 | -2.369 | -1.906 | -4.471 | -4.777 | -4.981 | -4.945 | 18606  | ENPP2    | NM_001285995_15_-1 |
| Prc1     | -1.279 | -0.200 | -0.704 | -1.225 | -3.095 | -2.208 | -0.520 | -0.527 | -0.738 | -3.452 | 233406 | PRC1     | NM_001285997_7_+1  |
| Prc1     | -0.454 | -0.521 | 1.694  | 2.514  | 3.150  | 3.073  | 3.035  | 2.063  | 1.289  | 1.245  | 233406 | PRC1     | NM_001285998_7_+1  |
| Plekhg5  | 0.876  | 1.748  | 1.245  | 1.887  | 2.655  | 1.949  | 1.544  | -0.054 | -0.796 | -1.099 | 269608 | PLEKHG5  | NM_001285999_4_+1  |
| Scyl3    | 1.710  | 0.126  | 0.363  | -0.180 | 1.345  | 0.167  | 0.912  | 1.497  | 1.621  | 0.933  | 240880 | SCYL3    | NM_001286002_1_+1  |
| Scyl3    | 2.172  | 1.320  | 2.138  | 2.148  | 2.197  | 1.288  | 1.365  | 1.846  | 2.874  | 2.785  | 240880 | SCYL3    | NM_001286003_1_+1  |
| Unk      | 1.057  | 2.168  | 2.258  | 0.837  | 1.980  | 2.352  | 2.108  | 1.992  | 2.782  | 1.449  | 217331 | UNK      | NM_001286006_11_+1 |
| Tubgcp2  | 3.488  | 3.033  | 3.362  | 3.357  | 3.433  | 3.266  | 3.336  | 3.109  | 4.269  | 3.650  | 74237  | TUBGCP2  | NM_001286007_7_-1  |
| Tubgcp2  | -4.981 | -0.235 | 1.232  | 0.109  | -0.033 | -0.555 | -0.380 | -0.939 | 0.184  | -0.208 | 74237  | TUBGCP2  | NM_001286009_7_-1  |
| Tubgcp2  | -1.292 | 1.252  | 1.116  | -0.647 | 0.958  | -0.465 | 1.302  | 0.610  | -0.517 | 0.537  | 74237  | TUBGCP2  | NM_001286011_7_-1  |
| Dlk2     | -4.863 | -4.981 | -4.939 | -4.978 | -4.932 | -4.972 | -4.918 | -4.969 | -4.981 | -4.843 | 106565 | DLK2     | NM_001286013_17_+1 |
| Klrk1    | -3.563 | -0.795 | 3.266  | 2.175  | 1.018  | 1.468  | 2.255  | 2.376  | -4.234 | -3.988 | 27007  | NA       | NM_001286018_6_-1  |
| Dlk2     | -3.843 | -4.981 | -4.268 | -4.104 | -3.895 | -3.838 | -3.211 | -3.519 | -4.981 | -1.157 | 106565 | DLK2     | NM_001286028_17_+1 |
| Dhx32    | -4.009 | -3.579 | -4.354 | -4.751 | -4.631 | -4.901 | -4.496 | -4.835 | -4.372 | -4.561 | 101437 | DHX32    | NM_001286030_7_-1  |
| Dhx32    | 0.422  | 1.286  | 0.541  | -0.501 | -1.449 | -0.212 | -1.740 | -0.197 | -1.362 | 0.731  | 101437 | DHX32    | NM_001286031_7_-1  |
| Dhx32    | -0.062 | 0.210  | -1.450 | -1.452 | -0.722 | 0.435  | -0.831 | -1.494 | -4.350 | -0.550 | 101437 | DHX32    | NM_001286032_7_-1  |
| Stx2     | 1.307  | 2.094  | 1.643  | 2.820  | 0.004  | 1.812  | 0.813  | 3.126  | 2.188  | 3.464  | 13852  | STX2     | NM_001286033_5_-1  |
| Stx2     | -4.135 | -0.590 | -0.445 | 0.369  | -0.465 | -1.649 | -2.886 | -0.290 | 0.812  | 0.741  | 13852  | STX2     | NM_001286034_5_-1  |
| Ncf1     | 2.491  | 2.172  | 2.134  | 1.537  | 1.915  | 1.541  | 1.251  | 1.730  | 3.137  | 3.477  | 17969  | NCF1     | NM_001286037_5_-1  |
| Klc3     | -4.324 | -4.024 | -4.730 | -3.345 | -4.857 | -4.961 | -4.890 | -4.952 | -4.981 | -4.981 | 232943 | KLC3     | NM_001286038_7_-1  |
| Klc3     | -0.518 | -0.475 | -1.835 | -2.141 | -1.582 | -2.910 | -2.568 | -3.032 | -4.981 | -4.981 | 232943 | KLC3     | NM_001286039_7_-1  |
| Anks1    | -4.834 | -4.825 | -4.873 | -4.953 | -4.937 | -4.952 | -4.834 | -4.971 | -4.738 | -4.907 | 224650 | ANKS1A   | NM_001286040_17_+1 |
| Anks1    | 1.228  | 1.595  | 2.339  | 2.029  | 1.946  | 1.763  | 1.589  | 2.634  | 3.298  | 3.135  | 224650 | ANKS1A   | NM_001286041_17_+1 |
| Entpd5   | -3.002 | 0.278  | -1.391 | -3.803 | -2.760 | -4.663 | -0.799 | -4.556 | 0.843  | -2.220 | 12499  | ENTPD5   | NM_001286049_12_-1 |
| Entpd5   | -0.466 | -2.919 | -1.693 | -3.746 | -3.842 | -4.844 | -1.400 | -4.547 | -0.217 | -3.533 | 12499  | ENTPD5   | NM_001286058_12_-1 |
| Angpt1   | 0.616  | 0.315  | -1.521 | -3.990 | -0.465 | -1.122 | 0.246  | -1.769 | -0.936 | -0.209 | 11600  | ANGPT1   | NM_001286062_15_-1 |
| Grk6     | 1.043  | 1.592  | -0.493 | -2.368 | -1.720 | 0.918  | -0.931 | -1.490 | 1.526  | 1.188  | 26385  | GRK6     | NM_001286063_13_+1 |
| Grk6     | 0.446  | 2.121  | -1.611 | -2.759 | -0.435 | -1.655 | 2.067  | -2.041 | 2.816  | 2.022  | 26385  | GRK6     | NM_001286064_13_+1 |
| Grk6     | 0.233  | 2.158  | -1.336 | -2.003 | 0.446  | -0.351 | 0.675  | 0.405  | 2.423  | 2.536  | 26385  | GRK6     | NM_001286065_13_+1 |
| Grk6     | -0.398 | 0.355  | -1.164 | -0.344 | -1.580 | -1.156 | -1.085 | 0.199  | 1.925  | 1.614  | 26385  | GRK6     | NM_001286066_13_+1 |
| Nin      | -4.371 | -3.584 | 0.465  | -0.116 | 1.341  | -0.526 | -1.434 | 0.609  | 1.548  | 2.730  | 18080  | NIN      | NM_001286079_12_-1 |
| Nin      | 0.707  | -3.951 | -1.192 | -1.649 | -1.070 | -0.915 | -0.696 | -0.689 | 0.453  | 1.438  | 18080  | NIN      | NM_001286080_12_-1 |
| Hpca     | -4.981 | -4.981 | -4.935 | -4.966 | -4.970 | -4.962 | -4.976 | -4.972 | -4.981 | -4.894 | 15444  | HPCA     | NM_001286081_4_-1  |
| Hpca     | -4.981 | -4.981 | -4.417 | -4.451 | -4.897 | -4.774 | -4.963 | -4.949 | -4.981 | -4.445 | 15444  | HPCA     | NM_001286083_4_-1  |
| Fam65b   | -0.761 | -1.021 | 0.600  | -2.775 | 4.391  | 2.406  | 3.456  | 3.746  | 5.375  | 4.308  | 193385 | FAM65B   | NM_001286100_13_+1 |
| Fam65b   | 0.352  | 0.016  | -3.106 | -2.607 | -2.294 | -0.156 | -1.245 | -1.076 | -2.465 | -0.753 | 193385 | FAM65B   | NM_001286101_13_+1 |
| Traf3    | 1.187  | -1.888 | -2.061 | -0.154 | -0.076 | -0.464 | 0.606  | 0.396  | 1.951  | 1.323  | 22031  | TRAF3    | NM_001286122_12_+1 |
| Nfib     | -4.415 | -4.114 | -4.982 | -4.771 | -4.919 | -3.835 | -4.824 | -4.856 | -4.432 | -4.810 | 18028  | NFIB     | NM_001286127_4_-1  |
| Nfib     | -1.055 | -3.557 | -4.985 | -4.429 | -4.927 | -4.866 | -4.698 | -4.642 | -4.142 | -4.651 | 18028  | NFIB     | NM_001286131_4_-1  |
| P3h1     | -2.090 | -3.972 | -2.901 | -4.508 | -3.346 | -3.740 | -2.148 | -3.591 | -0.566 | -4.698 | 56401  | P3H1     | NM_001286148_4_+1  |
| Zfp322a  | -2.205 | -4.118 | 0.316  | -4.576 | 0.844  | -4.647 | 0.152  | -4.622 | 1.028  | -4.183 | 218100 | ZNF322   | NM_001286155_13_-1 |
| Zfp322a  | 0.782  | -3.554 | -0.222 | -0.679 | -1.292 | 1.343  | 0.224  | 0.615  | 0.792  | 0.392  | 218100 | ZNF322   | NM_001286156_13_-1 |
| Mllt3    | -4.981 | -2.516 | -4.982 | -4.927 | -4.962 | -4.571 | -4.952 | -4.928 | -4.981 | -4.968 | 70122  | MLLT3    | NM_001286158_4_-1  |
| Rbpms    | -4.981 | -4.189 | -4.821 | -4.975 | -4.798 | -3.815 | -4.961 | -4.488 | -0.535 | -4.894 | 19663  | RBPMs    | NM_001286168_8_-1  |
| Lox      | -4.981 | -4.981 | -4.981 | -4.981 | -4.981 | -4.981 | -4.979 | -4.883 | -4.467 | -4.152 | 16948  | LOX      | NM_001286181_18_-1 |
| Lox      | -4.981 | -4.981 | -4.981 | -4.981 | -4.981 | -4.981 | -4.957 | -3.991 | -3.505 | -3.099 | 16948  | LOX      | NM_001286182_18_-1 |
| Terf2    | -4.295 | -3.678 | -2.310 | -0.673 | -0.809 | -1.671 | 0.449  | -1.430 | -4.741 | -2.349 | 21750  | TERF2    | NM_001286200_8_-1  |
| Timm9    | 4.190  | 4.273  | 2.813  | 3.327  | 3.377  | 3.323  | 3.110  | 3.122  | 2.307  | 1.767  | 30056  | TIMM9    | NM_001286203_12_-1 |
| Ash2l    | -1.219 | -1.719 | -2.520 | -0.913 | -2.543 | -0.683 | -1.289 | -4.068 | -2.238 | -1.369 | 23808  | ASH2L    | NM_001286207_8_-1  |
| Zfp386   | 2.441  | 1.355  | 1.807  | 1.857  | 0.291  | 0.541  | 1.238  | 1.739  | 0.959  | 1.057  | 56220  | ZNF519   | NM_001286214_12_+1 |
| Fuom     | -4.981 | -2.269 | -4.159 | -2.464 | -3.454 | -4.993 | -2.282 | -2.895 | -3.209 | -1.366 | 69064  | FUOM     | NM_001286217_7_-1  |
| Fuom     | -4.981 | -4.981 | -4.980 | -4.981 | -4.981 | -4.981 | -4.959 | -4.944 | -4.981 | -4.981 | 69064  | FUOM     | NM_001286218_7_-1  |
| Mier1    | -0.919 | -3.880 | -1.059 | -3.482 | -2.418 | -0.871 | -2.441 | -3.319 | -1.575 | -0.585 | 71148  | MIER1    | NM_001286221_4_+1  |
| Mier1    | 2.085  | -0.028 | 1.633  | 1.020  | 0.948  | 0.908  | 0.683  | 0.488  | 1.711  | 0.918  | 71148  | MIER1    | NM_001286222_4_+1  |
| Mier1    | 2.485  | 2.381  | 3.291  | 2.732  | 3.026  | 2.595  | 2.955  | 2.412  | 3.409  | 3.343  | 71148  | MIER1    | NM_001286223_4_+1  |
| Cacnb3   | -4.553 | -4.616 | -2.826 | -3.235 | -2.960 | -4.915 | -2.704 | -4.940 | -4.687 | -4.875 | 12297  | CACNB3   | NM_001286226_15_+1 |
| Nadk2    | -2.740 | -2.211 | 0.258  | 0.523  | -0.917 | -2.828 | -2.286 | -1.391 | 0.846  | -0.855 | 68646  | NADK2    | NM_001286253_15_+1 |
| Nadk2    | -3.279 | -3.404 | 0.501  | 0.609  | -1.309 | -0.718 | -1.640 | -2.758 | 1.347  | -0.386 | 68646  | NADK2    | NM_001286255_15_+1 |
| Nfat5    | 0.680  | 0.745  | 1.976  | 1.532  | 2.758  | 1.818  | 0.763  | 1.446  | -1.283 | 0.052  | 54446  | NFAT5    | NM_001286260_8_+1  |
| Ralgapa1 | -2.364 | -2.528 | -3.597 | -4.181 | -3.783 | -1.205 | -2.014 | -2.693 | -1.262 | -4.423 | 56784  | RALGAPA1 | NM_001286263_12_-1 |
| Bcl11b   | -2.123 | -1.991 | -4.970 | -0.534 | -2.401 | -3.848 | -1.176 | -1.395 | -4.835 | -4.948 | 58208  | BCL11B   | NM_001286343_12_-1 |
| Pard6a   | 2.759  | 2.697  | 2.123  | 1.551  | 1.907  | 1.512  | 0.999  | 1.119  | 1.584  | 1.108  | 56513  | PARD6A   | NM_001286344_8_+1  |
| Pard6a   | -4.736 | -1.671 | -2.728 | -4.944 | -2.793 | -2.686 | -1.569 | -4.272 | -4.806 | -2.793 | 56513  | PARD6A   | NM_001286345_8_+1  |
| Eml1     | -4.981 | -4.981 | -4.950 | -4.719 | -4.979 | -4.943 | -4.945 | -4.867 | -4.981 | -4.981 | 68519  | EML1     | NM_001286346_12_+1 |
| Eml1     | -4.981 | -4.981 | -4.931 | -4.438 | -4.978 | -4.799 | -4.865 | -4.358 | -4.981 | -4.981 | 68519  | EML1     | NM_001286347_12_+1 |
| Ldb2     | -4.981 | -4.981 | -4.978 | -4.978 | -4.958 | -4.602 | -4.977 | -4.978 | -4.981 | -4.981 | 16826  | LDLB2    | NM_001286348_5_-1  |
| Tcf25    | -0.797 | -0.483 | -1.654 | -0.872 | -0.015 | -0.779 | -1.525 | -0.881 | 0.007  | -0.060 | 66855  | TCF25    | NM_001286362_8_+1  |
| Tcf25    | -0.657 | -0.449 | -1.318 | 0.032  | -0.358 | -0.578 | -1.105 | -0.240 | 1.154  | 1.095  | 66855  | TCF25    | NM_001286363_8_+1  |
| Ghr      | -4.981 | -4.981 | -4.119 | -4.949 | -4.819 | -4.837 | -4.756 | -4.942 | -3.738 | -3.131 | 14600  | GHR      | NM_001286370_15_-1 |
| Stox2    | -4.609 | -4.357 | -4.822 | -4.942 | -4.972 | -4.980 | -4.813 | -4.955 | -4.731 | -3.659 | 71069  | STOX2    | NM_001286376_8_-1  |
| Vkorc1l1 | 1.159  | 1.462  | 2.582  | 1.595  | 0.848  | 0.043  | 0.149  | 0.239  | 0.228  | 0.013  | 69568  | VKORC1L1 | NM_001286382_5_+1  |
| Cklf     | 3.034  | 2.951  | 2.497  | 2.034  | 3.500  | 3.321  | 3.365  | 2.691  | 2.418  | 2.083  | 75458  | CKLF     | NM_001286383_8_+1  |
| Kars     | 3.278  | 2.395  | 1.783  | 1.394  | 1.923  | 1.522  | 0.600  | 1.073  | 0.798  | 1.353  | 85305  | KARS     | NM_001286384_8_-1  |
| Zfp821   | -1.209 | 0.098  | 0.214  | 1.294  | 0.781  | 0.757  | -1.089 | 0.857  | 2.159  | 0.874  | 75871  | ZNF821   | NM_001286391_8_+1  |

|          |        |        |        |        |        |        |        |        |        |        |           |          |                    |
|----------|--------|--------|--------|--------|--------|--------|--------|--------|--------|--------|-----------|----------|--------------------|
| Zfp821   | 1.474  | 1.051  | 1.924  | 1.381  | 1.312  | 1.248  | 1.394  | 1.263  | 1.729  | 2.090  | 75871     | ZNF821   | NM_001286393_8_+1  |
| Dao      | -4.981 | -4.551 | -4.591 | -4.061 | -0.573 | 0.101  | -2.852 | -4.876 | -4.934 | -4.981 | 13142     | DAO      | NM_001286396_5_+1  |
| Dao      | -4.981 | -2.583 | -3.017 | -3.455 | -0.245 | -1.300 | -2.260 | -2.418 | -4.394 | -4.981 | 13142     | DAO      | NM_001286397_5_+1  |
| Elf1     | 7.137  | 7.420  | 6.449  | 6.561  | 7.229  | 7.377  | 6.969  | 7.009  | 6.295  | 6.571  | 13709     | ELF1     | NM_001286411_14_+1 |
| Elf1     | 2.431  | 3.024  | 2.580  | 2.358  | 2.832  | 2.503  | 3.055  | 2.868  | 3.323  | 3.421  | 13709     | ELF1     | NM_001286412_14_+1 |
| Mtus1    | -4.981 | -4.981 | -4.981 | -4.981 | -4.976 | -4.885 | -4.981 | -4.981 | -0.387 | -1.708 | 102103    | MTUS1    | NM_001286413_8_-1  |
| Fer      | -4.981 | -4.981 | -4.872 | -4.872 | -4.483 | -4.195 | -4.778 | -4.233 | -4.419 | -2.930 | 14158     | FER      | NM_001286415_17_+1 |
| Rbfox2   | -4.981 | -4.981 | -4.967 | -4.967 | -4.980 | -4.967 | -4.980 | -4.981 | -4.981 | -4.375 | 93686     | RBFOX2   | NM_001286418_15_-1 |
| Rbfox2   | -4.981 | -4.981 | -4.981 | -4.981 | -4.979 | -4.979 | -4.981 | -4.981 | -4.981 | -3.766 | 93686     | RBFOX2   | NM_001286419_15_-1 |
| Otof     | -4.185 | -4.981 | -4.936 | -4.760 | -4.931 | -4.979 | -4.385 | -4.960 | -4.733 | -2.746 | 83762     | OTOF     | NM_001286421_5_-1  |
| Fut10    | -4.490 | 1.611  | -3.234 | -0.139 | -4.516 | -1.929 | -4.680 | -0.274 | -0.587 | 0.966  | 171167    | FUT10    | NM_001286422_8_+1  |
| Fut10    | -2.159 | 1.407  | -2.510 | 0.476  | -1.909 | -0.023 | -1.451 | 0.042  | -0.112 | 1.351  | 171167    | FUT10    | NM_001286424_8_+1  |
| Fut10    | -3.314 | -4.497 | -4.216 | -1.418 | -2.565 | -3.107 | -2.646 | -2.621 | -4.888 | -2.898 | 171167    | FUT10    | NM_001286425_8_+1  |
| Scf2     | -4.856 | -4.273 | -2.394 | -4.839 | -2.728 | -4.609 | -4.491 | -4.146 | -0.931 | -4.837 | 212986    | SCFD2    | NM_001286437_5_-1  |
| Rtn1     | -4.981 | -4.981 | -3.196 | -4.955 | -2.514 | -4.976 | -3.897 | -4.380 | -4.981 | -4.978 | 104001    | RTN1     | NM_001286448_12_-1 |
| Gatad2a  | 3.314  | 1.086  | 2.211  | 0.269  | 1.764  | 3.250  | 1.401  | 1.269  | 2.278  | 1.862  | 234366    | GATAD2A  | NM_001286450_8_-1  |
| Daam1    | -4.424 | -1.108 | -0.592 | -0.006 | -1.964 | -2.275 | 0.878  | -0.408 | 2.119  | 2.423  | 208846    | DAAM1    | NM_001286452_12_+1 |
| Pkd1l3   | -4.357 | -3.908 | -4.340 | -4.682 | -4.734 | -4.934 | -4.102 | -4.548 | -3.899 | -4.518 | 244646    | PKD1L3   | NM_001286454_8_+1  |
| Btrc     | 0.850  | 2.499  | -4.560 | 0.482  | -1.169 | 0.985  | -1.753 | -0.476 | -1.650 | 1.386  | 12234     | BTRC     | NM_001286465_19_+1 |
| Btrc     | -4.601 | -4.411 | -4.917 | -4.942 | -4.307 | -4.921 | -4.021 | -4.966 | -2.895 | -4.938 | 12234     | BTRC     | NM_001286466_19_+1 |
| Arhgap24 | -4.798 | -2.466 | -4.961 | -4.961 | -4.982 | -3.572 | -3.751 | -4.731 | -4.431 | -3.174 | 231532    | ARHGAP24 | NM_001286468_5_+1  |
| Xkr5     | -4.981 | -4.981 | -3.970 | -4.971 | -4.960 | -3.773 | -3.472 | -3.974 | -2.770 | -4.981 | 319581    | XKR5     | NM_001286469_8_-1  |
| Syce1l   | -4.981 | -4.981 | -4.937 | -4.672 | -4.023 | -4.847 | -4.223 | -2.822 | -4.190 | -3.855 | 668110    | SYCE1L   | NM_001286494_8_+1  |
| Tex264   | 3.482  | 3.344  | 0.488  | 2.210  | 0.092  | 1.197  | -0.781 | 2.075  | 2.000  | 2.499  | 21767     | TEX264   | NM_001286498_9_-1  |
| Pdyn     | -4.981 | -4.981 | -3.935 | -0.884 | -4.912 | -4.423 | -4.369 | -4.974 | -4.981 | -4.981 | 18610     | PDYN     | NM_001286502_2_-1  |
| Azi2     | 2.424  | 2.272  | 1.888  | 1.722  | 1.051  | 1.420  | 1.853  | 2.169  | 2.770  | 3.012  | 27215     | AZI2     | NM_001286507_9_+1  |
| Azi2     | 0.812  | -0.771 | -0.308 | -2.138 | -1.850 | -1.283 | -1.870 | -4.946 | -0.673 | -4.353 | 27215     | AZI2     | NM_001286508_9_+1  |
| Ahnak    | 3.722  | 4.093  | 1.406  | 0.805  | -4.862 | -1.813 | 1.463  | 2.826  | 4.043  | 3.617  | 66395     | AHNAK    | NM_001286518_19_+1 |
| Fbxl12   | 3.636  | 3.596  | 2.278  | 1.794  | 2.615  | 3.026  | 2.318  | 2.153  | 1.305  | 0.847  | 30843     | FBXL12   | NM_001286529_9_-1  |
| Fbxl12   | 1.900  | 2.545  | 2.492  | 2.730  | 2.733  | 2.126  | 2.326  | 2.262  | 2.581  | 2.121  | 30843     | FBXL12   | NM_001286530_9_-1  |
| Sigmar1  | -0.494 | 0.126  | -0.985 | 0.057  | -2.082 | -2.185 | -2.447 | -1.603 | 0.811  | -0.030 | 18391     | SIGMAR1  | NM_001286538_4_-1  |
| Sigmar1  | 0.268  | 1.768  | -1.852 | -0.827 | -1.311 | -1.681 | -1.036 | -0.485 | -1.001 | -0.247 | 18391     | SIGMAR1  | NM_001286539_4_-1  |
| Sigmar1  | -4.820 | -1.275 | -2.603 | -1.880 | -3.844 | -2.704 | -3.813 | -3.694 | -0.410 | -1.268 | 18391     | SIGMAR1  | NM_001286540_4_-1  |
| Sigmar1  | 0.154  | 1.132  | -1.051 | -1.350 | -2.088 | -3.870 | -4.424 | -1.935 | -0.288 | -2.207 | 18391     | SIGMAR1  | NM_001286541_4_-1  |
| Sigmar1  | -4.637 | -4.339 | -4.456 | -4.881 | -4.817 | -4.969 | -4.538 | -3.620 | -4.795 | -4.932 | 18391     | SIGMAR1  | NM_001286542_4_-1  |
| Stx3     | -4.299 | -4.662 | -1.290 | -4.928 | -4.868 | -4.955 | -2.703 | -3.357 | -4.645 | -2.216 | 20908     | STX3     | NM_001286543_19_-1 |
| Ccp1     | 4.606  | 4.689  | 4.356  | 4.509  | 3.760  | 4.251  | 4.640  | 5.162  | 6.430  | 6.311  | 72278     | CCPG1    | NM_001286544_9_+1  |
| Ccp1     | 1.922  | 1.519  | 0.914  | 1.027  | 0.762  | 1.568  | 0.609  | 0.587  | 2.272  | 1.997  | 72278     | CCPG1    | NM_001286545_9_+1  |
| Ccp1     | 2.988  | 2.525  | 0.675  | 0.975  | 2.551  | 1.682  | 2.429  | 1.213  | 3.210  | 2.617  | 72278     | CCPG1    | NM_001286546_9_+1  |
| Sigmar1  | 0.571  | 2.661  | -0.119 | 1.827  | -0.647 | 0.026  | -0.233 | 0.771  | -0.482 | -0.953 | 18391     | SIGMAR1  | NM_001286551_4_-1  |
| Nrap     | -4.981 | -4.981 | -4.979 | -4.414 | -3.994 | -4.384 | -4.981 | -4.981 | -4.981 | -4.981 | 18175     | NRAP     | NM_001286552_19_-1 |
| Ppp2r1b  | -0.979 | 0.394  | 1.046  | 0.817  | 0.874  | 0.989  | 1.516  | 0.965  | 2.305  | 2.424  | 73699     | PPP2R1B  | NM_001286553_9_+1  |
| Mtl5     | -4.537 | -4.303 | -4.497 | -4.682 | -4.771 | -4.956 | -4.572 | -3.936 | -3.925 | -4.531 | 17771     | TESMIN   | NM_001286557_19_+1 |
| Mtl5     | -3.955 | -3.475 | -2.391 | -2.568 | -3.885 | -4.630 | -3.189 | -3.986 | -0.113 | -1.176 | 17771     | TESMIN   | NM_001286558_19_+1 |
| Ergic2   | -4.720 | -1.068 | -4.817 | -3.519 | -4.932 | -4.963 | -3.258 | -2.883 | -1.281 | -0.930 | 67456     | ERGIC2   | NM_001286560_6_-1  |
| Eml4     | -1.568 | -1.393 | -3.210 | -3.522 | -4.908 | -4.908 | -4.944 | -4.960 | -0.683 | -4.693 | 78798     | EML4     | NM_001286567_17_+1 |
| Ehmt2    | 1.276  | 2.088  | 2.265  | 0.807  | 2.040  | 1.796  | 2.311  | 1.417  | 2.503  | 1.821  | 110147    | EHMT2    | NM_001286573_17_+1 |
| Ehmt2    | 3.432  | 3.186  | 4.026  | 4.683  | 4.268  | 4.372  | 4.007  | 4.114  | 4.590  | 5.183  | 110147    | EHMT2    | NM_001286575_17_+1 |
| C2cd5    | -1.311 | -2.654 | -3.292 | -3.137 | -4.757 | -3.978 | -1.033 | -1.850 | -3.712 | -0.823 | 74741     | C2CD5    | NM_001286578_6_-1  |
| Fam131b  | -4.981 | -2.061 | -4.075 | -4.076 | 0.220  | -0.329 | -1.808 | -2.946 | -4.981 | -4.981 | 76156     | FAM131B  | NM_001286584_6_-1  |
| Clasp2   | -4.647 | -3.755 | -2.558 | -4.717 | -4.968 | -4.980 | -3.587 | -3.878 | -4.797 | -4.981 | 76499     | CLASP2   | NM_001286599_9_+1  |
| Clasp2   | -1.460 | -0.827 | -2.472 | -3.414 | -3.318 | -3.298 | -2.857 | -2.838 | -3.837 | -4.261 | 76499     | CLASP2   | NM_001286600_9_+1  |
| Clasp2   | -2.530 | -0.548 | -0.828 | 0.220  | -1.813 | -0.737 | -2.112 | -3.990 | -4.664 | 0.052  | 76499     | CLASP2   | NM_001286601_9_+1  |
| Clasp2   | -1.840 | -0.602 | -3.733 | -2.449 | -3.641 | -3.488 | -3.593 | -4.041 | -4.706 | -4.357 | 76499     | CLASP2   | NM_001286602_9_+1  |
| Clasp2   | 0.358  | -1.043 | -1.605 | -0.133 | 0.132  | -0.335 | -1.407 | -2.213 | -1.684 | -1.026 | 76499     | CLASP2   | NM_001286603_9_+1  |
| Fam118b  | -4.081 | -3.797 | -4.458 | -4.707 | -4.751 | -4.873 | -4.452 | -2.215 | -4.498 | -4.724 | 109229    | FAM118B  | NM_001286604_9_-1  |
| Sigmar1  | -4.891 | -2.498 | -2.142 | -3.389 | -4.945 | -4.973 | -2.539 | -3.215 | -2.286 | -4.564 | 18391     | SIGMAR1  | NM_001286605_4_-1  |
| Banf1    | 2.098  | 1.519  | 1.434  | 1.579  | 1.519  | 1.160  | 1.295  | 0.884  | 0.493  | -0.034 | 23825     | BANF1    | NM_001286608_19_-1 |
| Arhgap25 | 0.424  | 1.467  | 1.661  | 0.826  | 0.934  | 0.554  | -0.133 | -0.343 | 1.729  | 0.931  | 232201    | ARHGAP25 | NM_001286610_6_-1  |
| Scn3b    | -4.981 | -4.981 | -4.979 | -4.952 | -4.918 | -4.397 | -4.799 | -4.724 | -2.247 | -4.981 | 235281    | SCN3B    | NM_001286614_9_+1  |
| Terf1    | 1.179  | 1.281  | 1.887  | 0.937  | 1.694  | 0.969  | 1.137  | 0.849  | 0.334  | 0.944  | 21749     | TERF1    | NM_001286628_1_+1  |
| Gimap8   | -0.246 | 1.597  | -3.294 | -1.678 | -4.324 | -0.948 | -0.423 | -1.111 | -3.490 | -4.975 | 243374    | GIMAP8   | NM_001286629_6_+1  |
| Brd4     | 4.147  | 4.428  | 4.196  | 4.412  | 4.604  | 4.496  | 4.426  | 4.390  | 4.723  | 4.259  | 57261     | NA       | NM_001286630_17_-1 |
| Atl2     | 0.392  | 0.966  | 0.192  | -0.048 | 0.239  | -1.172 | -0.071 | 0.202  | 2.025  | 1.820  | 56298     | ATL2     | NM_001286647_17_-1 |
| Tmem176b | 2.742  | 2.791  | 4.506  | 4.781  | 6.408  | 6.522  | 7.158  | 7.446  | 4.715  | 5.755  | 65963     | TMEM176B | NM_001286651_6_-1  |
| Tmem176b | 3.474  | 3.946  | 3.262  | 3.288  | 4.833  | 4.855  | 5.903  | 5.815  | 2.171  | 3.304  | 65963     | TMEM176B | NM_001286652_6_-1  |
| Rcan2    | -4.981 | -1.649 | -4.961 | -4.980 | -4.980 | -4.970 | -4.980 | -4.955 | -4.981 | -4.981 | 53901     | RCAN2    | NM_001286653_17_+1 |
| Rcan2    | 1.655  | -0.155 | -4.829 | -4.973 | -3.736 | -3.819 | -4.971 | -4.765 | -4.981 | -4.981 | 53901     | RCAN2    | NM_001286654_17_+1 |
| Pdpk1    | 3.996  | 4.327  | 2.825  | 3.080  | 3.107  | 2.971  | 3.064  | 3.006  | 3.779  | 3.750  | 18607     | PDPK1    | NM_001286662_17_-1 |
| Ssbp1    | 6.375  | 6.110  | 4.505  | 4.364  | 4.798  | 4.792  | 4.703  | 4.446  | 4.105  | 4.038  | 381760    | SSBP1    | NM_001286663_6_+1  |
| Ssbp1    | 6.375  | 6.110  | 4.505  | 4.364  | 4.798  | 4.792  | 4.703  | 4.446  | 4.105  | 4.038  | 381760    | SSBP1    | NM_001286664_6_+1  |
| Slc8a1   | -4.981 | -4.981 | -2.866 | -1.305 | -1.239 | -1.225 | -2.478 | -3.124 | -1.017 | -1.580 | 20541     | SLC8A1   | NM_001286684_17_-1 |
| Lr1f1    | 1.655  | 2.331  | 0.773  | 1.046  | 1.330  | 1.602  | 1.250  | 0.764  | 2.395  | 1.590  | 321000    | LRIF1    | NM_001286685_3_+1  |
| Xndc1    | 2.363  | 2.475  | 1.560  | 1.321  | 2.837  | 2.250  | 2.272  | 1.808  | 0.053  | -0.479 | 102443350 | NA       | NM_001286689_7_+1  |

|                |        |        |        |        |        |        |        |        |        |        |                 |          |                     |
|----------------|--------|--------|--------|--------|--------|--------|--------|--------|--------|--------|-----------------|----------|---------------------|
| Xndc1          | -0.649 | 0.486  | -1.824 | -0.805 | 0.029  | 0.160  | -0.732 | -0.156 | -0.267 | 0.346  | 102443350       | NA       | NM_001286690_7_+_1  |
| Tsc2           | -1.265 | 1.497  | -0.971 | -2.049 | -0.336 | -1.629 | -0.744 | -1.129 | 1.530  | -2.182 | 22084           | TSC2     | NM_001286713_17_-_1 |
| Tsc2           | 0.340  | -2.495 | -3.740 | -3.987 | -3.489 | -4.452 | -4.018 | -4.369 | -4.214 | -3.398 | 22084           | TSC2     | NM_001286714_17_-_1 |
| Tsc2           | 2.057  | 2.159  | 1.855  | 2.688  | 2.138  | 1.137  | 1.035  | 2.298  | 2.817  | 2.599  | 22084           | TSC2     | NM_001286716_17_-_1 |
| Tsc2           | 2.924  | 2.894  | 3.842  | 3.900  | 3.678  | 3.766  | 4.181  | 3.176  | 4.435  | 4.302  | 22084           | TSC2     | NM_001286718_17_-_1 |
| Tsc2           | 0.218  | 0.158  | -1.306 | 0.400  | -0.687 | -0.234 | -0.370 | -1.298 | 0.223  | 0.808  | 22084           | TSC2     | NM_001286720_17_-_1 |
| Trim26         | 1.178  | 2.361  | 1.666  | 1.516  | 1.887  | 0.941  | 0.889  | 0.034  | 0.882  | 0.573  | 22670           | TRIM26   | NM_001286726_17_+_1 |
| Trim26         | 5.338  | 4.684  | 5.283  | 5.621  | 5.047  | 5.083  | 5.051  | 4.870  | 5.298  | 5.305  | 22670           | TRIM26   | NM_001286727_17_+_1 |
| Glccl1         | 5.096  | 5.561  | 3.275  | 2.110  | 3.250  | 2.356  | 3.102  | 1.334  | 2.183  | 1.668  | 170772          | GLCCI1   | NM_001286728_6_+_1  |
| Glccl1         | 5.812  | 5.723  | 3.121  | 2.842  | 2.822  | 2.565  | 1.701  | 2.780  | -0.131 | 2.683  | 170772          | GLCCI1   | NM_001286729_6_+_1  |
| Pacsin1        | 5.435  | 5.829  | -3.589 | -1.519 | -4.069 | -0.716 | -2.377 | -2.339 | -4.981 | -4.516 | 23969           | PACSIN1  | NM_001286743_17_+_1 |
| Pacsin1        | 5.250  | 5.610  | 0.184  | 0.392  | -1.669 | -1.977 | -4.805 | -0.269 | -4.981 | -2.560 | 23969           | PACSIN1  | NM_001286744_17_+_1 |
| Cd27           | -4.648 | -4.752 | -4.866 | -1.014 | -2.486 | -3.767 | -3.153 | -3.089 | -2.533 | -2.022 | 21940           | CD27     | NM_001286753_6_-_1  |
| Tiam2          | -4.981 | -4.981 | -2.670 | -5.002 | -2.422 | -4.960 | 1.395  | -3.064 | 3.674  | -0.575 | 24001           | TIAM2    | NM_001286757_17_+_1 |
| Tiam2          | -0.618 | -0.394 | 0.823  | -1.090 | 0.593  | -1.443 | 3.824  | 0.213  | 5.513  | 1.125  | 24001           | TIAM2    | NM_001286758_17_+_1 |
| Rap1gds1       | 0.557  | 0.376  | 2.294  | 2.626  | 3.258  | 2.717  | 3.383  | 1.774  | 4.381  | 4.103  | 229877          | RAP1GDS1 | NM_001286759_3_-_1  |
| Magi1          | -4.981 | -4.981 | -4.978 | -4.978 | -4.981 | -4.981 | -4.981 | -4.971 | -4.981 | -4.955 | 14924           | MAGI1    | NM_001286784_6_-_1  |
| Magi1          | -4.981 | -4.981 | -4.971 | -4.782 | -4.979 | -4.979 | -4.974 | -4.978 | -4.981 | -4.981 | 14924           | MAGI1    | NM_001286786_6_-_1  |
| Camk2a         | 0.249  | -1.577 | -2.217 | -3.541 | 0.956  | 0.895  | 0.251  | -2.027 | -2.598 | -2.902 | 12322           | CAMK2A   | NM_001286809_18_+_1 |
| Usp11          | -4.145 | 0.416  | -2.651 | -4.586 | -1.066 | -0.434 | -3.161 | -2.449 | -3.928 | -4.547 | 231915          | USPL1    | NM_001286824_5_+_1  |
| Usp11          | 0.573  | 2.346  | 0.598  | 0.873  | 0.434  | -0.474 | 0.951  | -0.270 | 1.312  | 0.421  | 231915          | USPL1    | NM_001286825_5_+_1  |
| Etv3           | -0.033 | -4.010 | 4.933  | 4.187  | 5.131  | 4.043  | 4.423  | 1.575  | 2.879  | 0.976  | 27049           | ETV3     | NM_001286844_3_+_1  |
| Gpatch4        | -1.473 | 0.480  | 0.107  | 0.884  | -1.500 | 0.805  | -1.135 | 0.365  | -3.382 | -0.895 | 66614           | GPATCH4  | NM_001286857_3_+_1  |
| Rnaseh1        | 3.771  | 3.936  | 3.896  | 3.490  | 3.385  | 3.499  | 3.511  | 3.080  | 3.418  | 2.831  | 19819           | RNASEH1  | NM_001286865_12_+_1 |
| Jund           | 6.911  | 7.049  | 6.730  | 6.671  | 7.006  | 7.303  | 6.928  | 7.147  | 7.094  | 6.852  | 16478           | JUND     | NM_001286944_8_+_1  |
| Pla2g12a       | -0.614 | -4.981 | -1.422 | -4.962 | -1.465 | -1.958 | -0.982 | -4.883 | -2.045 | -4.973 | 66350           | PLA2G12A | NM_001286948_3_+_1  |
| Dnajc19        | 0.891  | 0.280  | 1.089  | 0.850  | 0.437  | 0.511  | 0.834  | 1.461  | 0.542  | 0.779  | 67713           | DNAJC19  | NM_001286972_3_-_1  |
| Dnajc19        | 0.386  | 0.214  | -0.973 | -0.844 | -0.419 | -0.738 | 0.598  | -0.472 | -0.790 | -0.887 | 67713           | DNAJC19  | NM_001286973_3_-_1  |
| Mkks           | 4.889  | 4.484  | 4.366  | 3.878  | 4.147  | 3.364  | 4.347  | 3.097  | 3.629  | 2.611  | 59030           | MKKS     | NM_001286981_2_-_1  |
| Mkks           | -4.981 | -3.133 | -3.113 | -4.923 | -4.933 | -4.605 | -4.955 | -3.271 | -3.195 | -4.981 | 59030           | MKKS     | NM_001286983_2_-_1  |
| Dram2          | 2.696  | 2.969  | 2.290  | 2.505  | 2.828  | 3.100  | 3.130  | 3.316  | 3.595  | 4.231  | 67171           | DRAM2    | NM_001286986_3_+_1  |
| Dram2          | -1.352 | -4.083 | 0.167  | -1.479 | -0.714 | -3.745 | -1.694 | -1.028 | 1.234  | 0.852  | 67171           | DRAM2    | NM_001286987_3_+_1  |
| Gpr160         | -1.956 | -0.677 | -4.506 | -4.928 | -4.948 | -4.705 | -2.385 | -2.406 | -4.239 | -1.379 | 71862           | GPR160   | NM_001286994_3_+_1  |
| Gpr160         | 1.280  | -1.919 | -3.520 | -4.796 | -0.875 | -4.082 | -0.985 | -1.141 | 1.460  | 1.389  | 71862           | GPR160   | NM_001286995_3_+_1  |
| Gpr160         | 3.587  | 3.364  | -0.544 | -2.711 | -4.848 | -1.937 | 0.254  | 0.605  | 2.169  | 1.830  | 71862           | GPR160   | NM_001286996_3_+_1  |
| Rnpc3          | 1.070  | -1.162 | -1.456 | -2.720 | 0.624  | -0.981 | -0.812 | -2.808 | 1.276  | -0.109 | 67225           | RNPC3    | NM_001287015_3_-_1  |
| Vegfa          | -4.981 | -4.540 | -4.524 | -4.869 | -4.736 | -4.177 | -2.158 | -4.081 | -4.702 | -4.449 | 22339           | VEGFA    | NM_001287056_17_-_1 |
| Vegfa          | -4.981 | -4.337 | -2.927 | -4.775 | 1.855  | -0.341 | 1.816  | -0.845 | 0.065  | 0.837  | 22339           | VEGFA    | NM_001287057_17_-_1 |
| Vegfa          | -4.981 | -1.903 | -4.932 | -2.136 | 1.695  | -0.728 | 2.799  | 0.432  | 1.323  | 1.404  | 22339           | VEGFA    | NM_001287058_17_-_1 |
| Tspear         | -1.011 | 0.226  | -1.050 | -0.914 | -2.129 | -2.062 | -3.164 | -2.558 | -4.981 | -3.853 | 252974          | TSPEAR   | NM_001287074_10_+_1 |
| 4933434E20Rik  | -0.565 | 0.948  | -0.712 | -0.514 | -0.482 | -1.435 | -1.051 | -1.141 | -0.539 | 0.521  | 99650           | C1orf43  | NM_001287086_3_+_1  |
| 4933434E20Rik  | -3.716 | -3.247 | -4.150 | -4.528 | -2.447 | -4.870 | -4.228 | -4.747 | -4.102 | -4.417 | 99650           | C1orf43  | NM_001287087_3_+_1  |
| Amigo1         | -0.607 | -2.032 | -3.633 | -3.356 | -3.136 | -3.270 | -4.562 | -4.801 | -3.345 | -2.898 | 229715          | AMIGO1   | NM_001287093_3_+_1  |
| Npnt           | -4.981 | -4.981 | -4.936 | -4.964 | -4.980 | -4.933 | -4.975 | -4.978 | -4.981 | -4.981 | 114249          | NPNT     | NM_001287101_3_-_1  |
| Npnt           | -4.981 | -4.981 | -4.924 | -4.960 | -4.960 | -4.273 | -4.934 | -4.956 | -4.981 | -4.981 | 114249          | NPNT     | NM_001287102_3_-_1  |
| Npnt           | -4.981 | -4.981 | -2.710 | -4.518 | -4.535 | -2.122 | -4.971 | -3.767 | -4.981 | -4.981 | 114249          | NPNT     | NM_001287103_3_-_1  |
| P2ry14         | 7.042  | 7.143  | 6.562  | 6.260  | -1.512 | -1.803 | 1.176  | 3.216  | -4.091 | -4.578 | 140795          | P2RY14   | NM_001287119_3_-_1  |
| P2ry14         | 7.516  | 7.797  | 6.728  | 6.310  | -2.704 | -0.963 | 0.771  | 2.216  | -2.757 | -2.691 | 140795          | P2RY14   | NM_001287120_3_-_1  |
| P2ry14         | -3.996 | -3.559 | -0.557 | -2.660 | -4.959 | -4.975 | -4.938 | -4.928 | -4.869 | -4.976 | 140795          | P2RY14   | NM_001287121_3_-_1  |
| P2ry14         | 1.876  | 0.966  | 2.571  | 1.693  | -4.959 | -4.971 | -4.445 | -0.371 | -4.775 | -4.947 | 140795          | P2RY14   | NM_001287122_3_-_1  |
| P2ry14         | 1.419  | 1.527  | 2.050  | 1.433  | -4.973 | -4.976 | -4.515 | -4.862 | -4.825 | -4.966 | 140795          | P2RY14   | NM_001287123_3_-_1  |
| P2ry14         | 1.056  | 1.487  | 2.400  | -0.302 | -4.779 | -2.908 | -0.950 | -3.728 | -2.286 | -0.789 | 140795          | P2RY14   | NM_001287124_3_-_1  |
| Zzz3           | 2.802  | 3.515  | 2.279  | 2.442  | 2.737  | 2.937  | 2.683  | 2.106  | 2.154  | 2.635  | 108946          | ZZZ3     | NM_001287139_3_+_1  |
| Nup98          | 3.813  | 3.512  | 4.485  | 4.600  | 4.551  | 4.412  | 3.918  | 4.456  | 4.250  | 4.703  | 269966          | NUP98    | NM_001287164_7_-_1  |
| Nup98          | 1.862  | 1.878  | 2.654  | 2.419  | 2.916  | 2.124  | 2.755  | 1.680  | 3.190  | 2.944  | 269966          | NUP98    | NM_001287165_7_-_1  |
| Nup98          | 1.450  | 2.619  | 3.245  | 3.726  | 3.270  | 3.201  | 2.741  | 3.284  | 2.901  | 3.083  | 269966          | NUP98    | NM_001287166_7_-_1  |
| Nup98          | 0.241  | -0.088 | 1.355  | -0.109 | 0.921  | 1.136  | 0.807  | 0.255  | 0.334  | -0.554 | 269966          | NUP98    | NM_001287167_7_-_1  |
| Sct            | -1.170 | -4.981 | -2.738 | -4.802 | -4.941 | -4.932 | -4.897 | -3.893 | -4.981 | -4.981 | 20287           | NA       | NM_001287171_7_-_1  |
| Alpl           | -4.981 | -4.981 | -1.213 | -0.026 | -4.612 | -4.435 | -4.058 | -3.366 | -4.471 | -4.571 | 11647           | ALPL     | NM_001287172_4_-_1  |
| Record_removed | -4.981 | -4.981 | -4.452 | -4.668 | -4.980 | -4.971 | -4.947 | -4.915 | -4.862 | -4.919 | Record_removeNA | NA       | NM_001287176_4_-_1  |
| Kif14          | -4.981 | -1.756 | 0.634  | 0.954  | 1.692  | 0.927  | 0.401  | -0.152 | -0.713 | -1.019 | 381293          | KIF14    | NM_001287179_1_+_1  |
| Atf4           | 8.043  | 8.018  | 7.020  | 7.114  | 7.220  | 7.650  | 7.088  | 7.219  | 6.673  | 6.776  | 11911           | ATF4     | NM_001287180_15_+_1 |
| BC030499       | -3.668 | -4.981 | -2.508 | -3.575 | -2.698 | -2.612 | -3.063 | -3.381 | -4.981 | -2.384 | 216976          | SGK494   | NM_001287206_11_+_1 |
| Cd209b         | -4.981 | -4.981 | -4.980 | -4.964 | -3.796 | -1.604 | -0.995 | 0.953  | -1.548 | -4.838 | 69165           | NA       | NM_001287211_8_-_1  |
| Fxyd5          | 6.956  | 6.257  | 6.916  | 6.317  | 5.449  | 4.488  | 7.709  | 7.532  | 8.443  | 7.834  | 18301           | FXDY5    | NM_001287213_7_-_1  |
| Fxyd5          | 6.629  | 6.015  | 6.583  | 5.834  | 5.125  | 4.635  | 7.148  | 7.127  | 7.989  | 7.368  | 18301           | FXDY5    | NM_001287217_7_-_1  |
| Mst1r          | -4.981 | -4.981 | -4.915 | -1.064 | -4.945 | -0.947 | -2.502 | -0.138 | 0.592  | -0.430 | 19882           | MST1R    | NM_001287261_9_+_1  |
| Gck            | -4.981 | -4.981 | -4.975 | -4.862 | -3.736 | -2.073 | -4.912 | -3.700 | -4.981 | -4.981 | 103988          | GCK      | NM_001287386_11_-_1 |
| Tal1           | -4.981 | -1.944 | -5.013 | -1.133 | -2.733 | -1.406 | -3.363 | -0.775 | -3.333 | -2.184 | 21349           | TAL1     | NM_001287388_4_+_1  |
| Csf2rb2        | 7.085  | 6.522  | 3.214  | 2.647  | 3.360  | 2.497  | 4.624  | 3.268  | 3.285  | 2.765  | 12984           | CSF2RB   | NM_001287389_15_-_1 |
| Cebpa          | 0.058  | -1.102 | -0.975 | -1.482 | -0.799 | -1.712 | 0.745  | 0.598  | 2.573  | 2.587  | 12606           | CEBPA    | NM_001287514_7_+_1  |
| Cebpa          | 0.058  | -1.102 | -0.975 | -1.482 | -0.799 | -1.712 | 0.745  | 0.598  | 2.573  | 2.587  | 12606           | CEBPA    | NM_001287515_7_+_1  |
| Cebpa          | 0.058  | -1.102 | -0.975 | -1.482 | -0.799 | -1.712 | 0.745  | 0.598  | 2.573  | 2.587  | 12606           | CEBPA    | NM_001287521_7_+_1  |
| Cebpa          | 0.058  | -1.102 | -0.975 | -1.482 | -0.799 | -1.712 | 0.745  | 0.598  | 2.573  | 2.587  | 12606           | CEBPA    | NM_001287523_7_+_1  |

|               |        |        |        |        |        |        |        |        |        |        |           |         |                     |
|---------------|--------|--------|--------|--------|--------|--------|--------|--------|--------|--------|-----------|---------|---------------------|
| Arhgap6       | -0.316 | -1.002 | -4.943 | -4.957 | -2.552 | -2.804 | -4.084 | -4.960 | -4.903 | -4.882 | 11856     | ARHGAP6 | NM_001287530_X_+_1  |
| Rpl34         | 1.278  | 1.092  | 1.207  | 0.947  | 1.121  | 0.924  | 1.416  | 0.320  | 0.853  | -0.580 | 68436     | NA      | NM_001287581_3_-_1  |
| Cebpb         | 4.252  | 3.498  | 0.954  | 2.089  | 3.456  | 4.215  | 7.092  | 7.183  | 9.573  | 9.400  | 12608     | CEBPB   | NM_001287738_2_+_1  |
| Cebpb         | 4.252  | 3.498  | 0.954  | 2.089  | 3.456  | 4.215  | 7.092  | 7.183  | 9.573  | 9.400  | 12608     | CEBPB   | NM_001287739_2_+_1  |
| Fhl1          | -1.415 | -4.853 | -1.712 | -1.074 | -1.866 | -1.899 | -1.767 | -1.764 | -1.046 | -0.027 | 14199     | FHL1    | NM_001287800_X_+_1  |
| Fmn1          | -4.905 | -4.844 | -3.934 | -3.535 | -4.046 | -3.135 | -4.759 | -3.116 | -4.981 | -3.504 | 14260     | FMN1    | NM_001287817_2_+_1  |
| Fmn1          | -3.563 | -3.267 | -4.981 | -4.981 | -4.981 | -4.981 | -4.798 | -4.964 | -4.981 | -4.981 | 14260     | FMN1    | NM_001287818_2_+_1  |
| Adh5          | 1.759  | 1.149  | 1.155  | -0.706 | -0.744 | 0.246  | 1.485  | -0.868 | -1.773 | -0.317 | 11532     | ADH5    | NM_001288578_3_+_1  |
| Mdm2          | 3.533  | 4.380  | 3.586  | 3.073  | 3.208  | 2.792  | 2.418  | 2.626  | 3.598  | 3.683  | 17246     | MDM2    | NM_001288586_10_-_1 |
| Atg9a         | 2.075  | 1.423  | 1.523  | 0.920  | 1.939  | 0.907  | 1.506  | 1.721  | 4.301  | 3.289  | 245860    | ATG9A   | NM_001288612_1_-_1  |
| Atg9a         | -0.607 | -0.059 | 0.750  | -2.028 | -0.082 | -1.719 | 2.267  | -1.088 | 2.338  | 2.083  | 245860    | ATG9A   | NM_001288613_1_-_1  |
| Gsta3         | -4.884 | -4.981 | -4.980 | -4.981 | -4.420 | -4.975 | -4.939 | -4.972 | -4.981 | -4.934 | 14859     | GSTA3   | NM_001288617_1_+_1  |
| Arid3a        | 3.073  | 3.775  | 2.703  | 0.298  | 1.562  | 1.279  | 2.606  | 2.433  | 4.663  | 3.878  | 13496     | ARID3A  | NM_001288625_10_+_1 |
| Arid3a        | -3.325 | -1.513 | -4.137 | -3.867 | -3.994 | -2.636 | -3.995 | -4.557 | -3.604 | -3.709 | 13496     | ARID3A  | NM_001288626_10_+_1 |
| Emp1          | -2.779 | -3.822 | -4.657 | -4.057 | -4.879 | -4.841 | -4.096 | -4.623 | -4.086 | -1.500 | 13730     | EMP1    | NM_001288627_6_+_1  |
| Emp1          | -3.897 | -3.694 | -4.824 | -4.750 | -1.826 | -4.448 | -2.391 | -4.816 | -2.113 | -2.071 | 13730     | EMP1    | NM_001288628_6_+_1  |
| Klrc1         | -4.708 | -1.797 | -3.640 | -2.857 | -4.899 | -4.027 | -4.122 | -4.229 | -4.964 | -4.977 | 16641     | KLRC1   | NM_001288664_6_-_1  |
| 4933428G20Rik | -3.668 | -4.981 | -4.044 | -4.984 | -4.977 | -4.739 | -3.102 | -4.461 | -1.538 | -2.997 | 100141474 | NA      | NM_001289118_11_-_1 |
| Fam110a       | 3.504  | 0.407  | 0.974  | -0.457 | 0.975  | -1.342 | 0.583  | -1.504 | -0.492 | -2.054 | 73847     | FAM110A | NM_001289150_2_-_1  |
| Fam110a       | 0.643  | -1.751 | -2.414 | -3.331 | -2.195 | -1.514 | -0.603 | -4.284 | -2.968 | -3.910 | 73847     | FAM110A | NM_001289151_2_-_1  |
| Pira6         | 2.810  | 1.087  | 1.883  | 0.132  | 5.271  | 1.857  | 4.096  | 4.225  | 5.142  | 5.817  | 18729     | NA      | NM_001289428_7_-_1  |
| Cipc          | -3.973 | -3.870 | -3.932 | -4.268 | -4.429 | -3.928 | -3.989 | -3.794 | -4.094 | -2.341 | 217732    | CIPC    | NM_001289429_12_+_1 |
| Cipc          | 1.045  | -1.526 | 0.849  | 0.109  | 0.118  | -2.487 | 1.294  | -0.234 | 1.619  | 2.033  | 217732    | CIPC    | NM_001289430_12_+_1 |
| Cipc          | -4.283 | -1.156 | -4.579 | -4.777 | -2.906 | -2.175 | -2.265 | -3.137 | -1.765 | -1.132 | 217732    | CIPC    | NM_001289431_12_+_1 |
| Cipc          | -3.779 | -3.612 | -2.231 | -1.609 | -2.992 | 0.593  | -2.356 | -2.230 | -0.839 | 0.214  | 217732    | CIPC    | NM_001289432_12_+_1 |
| Ccdc50        | -1.850 | -0.193 | -0.132 | -1.006 | -1.937 | -0.286 | 0.181  | -0.021 | -0.174 | 0.459  | 67501     | NA      | NM_001289436_16_+_1 |
| Kansl2        | 3.725  | 3.970  | 3.514  | 2.419  | 3.796  | 3.969  | 3.611  | 3.436  | 2.625  | 3.383  | 69612     | KANSL2  | NM_001289437_15_-_1 |
| Kansl2        | -0.126 | -0.117 | 0.887  | -0.567 | 0.547  | 0.168  | -0.128 | 0.810  | 1.460  | 2.528  | 69612     | KANSL2  | NM_001289438_15_-_1 |
| Kansl2        | -4.336 | -0.725 | -2.089 | -4.478 | -2.233 | -4.837 | -1.999 | -0.532 | -0.364 | -2.403 | 69612     | KANSL2  | NM_001289439_15_-_1 |
| Kansl2        | 0.880  | 2.663  | 2.713  | 2.456  | 2.687  | 2.578  | 2.408  | 2.213  | 3.147  | 2.865  | 69612     | KANSL2  | NM_001289440_15_-_1 |
| Grap2         | 4.211  | 3.774  | 3.164  | 2.937  | 3.334  | 2.201  | 3.684  | 3.481  | 0.494  | -0.311 | 17444     | GRAP2   | NM_001289442_15_+_1 |
| Tnk2          | 1.078  | 0.838  | 0.212  | -0.040 | 1.455  | 0.934  | 0.412  | 0.704  | -0.315 | -1.672 | 51789     | TNK2    | NM_001289443_16_+_1 |
| Atp9a         | -4.398 | -4.091 | -4.653 | -4.897 | -4.866 | -4.953 | -4.700 | -4.915 | -4.856 | -4.891 | 11981     | ATP9A   | NM_001289445_2_-_1  |
| Atp9a         | -0.078 | 1.768  | -0.549 | -2.559 | -0.511 | -0.781 | -0.738 | 0.831  | -1.432 | -1.447 | 11981     | ATP9A   | NM_001289446_2_-_1  |
| Rad1          | 3.523  | 3.400  | 3.245  | 3.007  | 3.394  | 2.839  | 3.038  | 3.064  | 2.503  | 2.553  | 19355     | RAD1    | NM_001289447_15_+_1 |
| Rad1          | 0.289  | -0.177 | 0.904  | 0.636  | 0.879  | 0.376  | -0.258 | -0.636 | 0.008  | -0.906 | 19355     | RAD1    | NM_001289448_15_+_1 |
| Cdl1d2        | -2.389 | -3.208 | -1.891 | -1.777 | -2.843 | -4.731 | -2.755 | -3.308 | -4.981 | -4.008 | 12480     | NA      | NM_001289449_3_+_1  |
| Kcnab1        | -4.981 | -4.981 | -2.530 | -2.507 | -2.059 | -2.876 | -2.018 | -4.542 | -4.981 | -4.981 | 16497     | KCNAB1  | NM_001289450_3_+_1  |
| Trem1         | -2.004 | -4.981 | -4.954 | -2.104 | -3.551 | -4.551 | -4.359 | -4.973 | -3.163 | -4.788 | 71326     | TREML1  | NM_001289451_17_+_1 |
| Fut7          | -4.641 | -4.380 | -4.325 | -1.224 | 0.688  | 0.699  | 1.917  | 1.314  | 2.248  | 1.954  | 14347     | FUT7    | NM_001289453_2_+_1  |
| Fut7          | -4.533 | -4.225 | -3.806 | -4.035 | -3.071 | -4.879 | -1.645 | 0.112  | -3.327 | 1.388  | 14347     | FUT7    | NM_001289454_2_+_1  |
| Fut7          | -4.336 | -3.987 | -4.477 | -0.765 | 0.251  | -0.517 | 1.442  | 1.184  | 0.357  | 0.133  | 14347     | FUT7    | NM_001289455_2_+_1  |
| Fut7          | -1.656 | -1.856 | -1.212 | -1.136 | 0.271  | -0.295 | 0.953  | 0.272  | -0.596 | 0.798  | 14347     | FUT7    | NM_001289456_2_+_1  |
| Trem1         | -1.494 | -1.841 | -3.763 | -1.201 | -2.672 | -3.405 | -1.732 | -3.025 | -0.514 | -0.567 | 71326     | TREML1  | NM_001289457_17_+_1 |
| Hgf           | -4.719 | -4.645 | -4.864 | -4.975 | -4.421 | -2.471 | 0.866  | 0.186  | 2.804  | 3.172  | 15234     | HGF     | NM_001289458_5_+_1  |
| Hgf           | -4.699 | -4.623 | -4.854 | -4.975 | -4.012 | -4.796 | -1.271 | -1.504 | -3.562 | -4.291 | 15234     | HGF     | NM_001289459_5_+_1  |
| Hgf           | -4.981 | -4.981 | -4.911 | -4.022 | -3.122 | -2.727 | 1.052  | 1.058  | 1.508  | 1.194  | 15234     | HGF     | NM_001289460_5_+_1  |
| Hgf           | -1.940 | -3.267 | -3.444 | -4.979 | -4.179 | -4.785 | -0.495 | -1.535 | 1.604  | 1.588  | 15234     | HGF     | NM_001289461_5_+_1  |
| Cd84          | 1.418  | -0.186 | -0.378 | 0.162  | -0.006 | 0.974  | 0.264  | 1.872  | 4.614  | 4.605  | 12523     | CD84    | NM_001289470_1_+_1  |
| Klf10         | -4.981 | -4.981 | -4.972 | -4.972 | -4.898 | -4.898 | -4.140 | -3.545 | 0.580  | -0.057 | 21847     | KLF10   | NM_001289471_15_-_1 |
| Pitpnm2       | -2.213 | -1.016 | -2.354 | -2.151 | -2.725 | -3.487 | -4.115 | -2.292 | -4.981 | -4.981 | 19679     | PITPNM2 | NM_001289472_5_-_1  |
| Erbin         | 5.132  | 4.850  | 5.662  | 5.266  | 4.182  | 4.705  | 3.980  | 5.111  | 5.231  | 5.601  | 59079     | ERBIN   | NM_001289473_13_-_1 |
| Erbin         | 4.282  | 4.915  | 5.967  | 5.159  | 4.766  | 4.361  | 4.888  | 4.116  | 4.453  | 5.479  | 59079     | ERBIN   | NM_001289474_13_-_1 |
| Erbin         | -2.455 | 0.084  | 0.328  | 0.313  | -0.245 | 1.019  | -0.470 | -0.609 | 1.007  | -0.494 | 59079     | ERBIN   | NM_001289475_13_-_1 |
| Psm1a7        | 1.123  | 1.027  | 1.663  | 1.545  | 1.337  | 1.382  | 1.379  | 1.188  | 2.190  | 1.871  | 26444     | PSMA7   | NM_001289476_2_-_1  |
| Papss1        | 3.770  | 0.458  | 2.411  | 1.052  | 3.242  | -0.402 | 3.695  | 0.047  | 3.761  | -0.839 | 23971     | PAPSS1  | NM_001289477_3_+_1  |
| Papss1        | 1.284  | -4.034 | 1.193  | -4.449 | 0.545  | -4.476 | -0.748 | -4.440 | 3.453  | -4.816 | 23971     | PAPSS1  | NM_001289478_3_+_1  |
| Papss1        | -4.531 | -2.022 | -4.790 | -4.950 | -2.178 | -4.922 | -2.671 | -4.793 | -4.584 | -1.723 | 23971     | PAPSS1  | NM_001289479_3_+_1  |
| Sh3yl1        | -3.273 | -4.687 | -2.391 | -1.686 | -3.214 | -2.895 | -1.844 | -4.900 | -3.733 | -1.639 | 24057     | SH3YL1  | NM_001289480_12_+_1 |
| Zscan10       | -4.981 | -4.981 | -4.980 | -4.966 | -4.981 | -4.981 | -4.981 | -4.981 | -4.981 | -4.981 | 332221    | ZSCAN10 | NM_001289481_17_+_1 |
| Zscan10       | -4.981 | -4.795 | -4.978 | -4.175 | -4.855 | -4.974 | -3.764 | -4.536 | -4.981 | -4.981 | 332221    | ZSCAN10 | NM_001289482_17_+_1 |
| Zscan10       | -4.981 | -2.895 | -4.975 | -4.862 | -4.717 | -4.614 | -4.972 | -4.838 | -4.981 | -4.981 | 332221    | ZSCAN10 | NM_001289483_17_+_1 |
| Zscan10       | -4.981 | -4.851 | -4.976 | -4.908 | -4.981 | -4.981 | -4.981 | -4.981 | -4.981 | -4.981 | 332221    | ZSCAN10 | NM_001289484_17_+_1 |
| Exoc3l4       | -4.785 | -4.434 | 1.172  | 2.029  | -2.527 | -1.895 | -4.584 | -4.936 | -4.720 | -4.850 | 74190     | EXOC3L4 | NM_001289487_12_+_1 |
| Exoc3l4       | -4.258 | -3.480 | 1.525  | 2.363  | -4.496 | -2.852 | -1.940 | -0.262 | -3.949 | -0.374 | 74190     | EXOC3L4 | NM_001289488_12_+_1 |
| Exoc3l4       | -2.927 | -1.539 | 1.207  | 2.109  | -1.473 | -1.321 | -0.389 | -1.152 | 0.287  | -1.929 | 74190     | EXOC3L4 | NM_001289489_12_+_1 |
| Oard1         | 4.820  | 4.681  | 3.095  | 3.335  | 4.301  | 4.023  | 3.973  | 3.644  | 2.803  | 2.468  | 106821    | OARD1   | NM_001289490_17_+_1 |
| Oard1         | 5.138  | 5.198  | 3.992  | 4.091  | 4.555  | 4.483  | 4.515  | 3.415  | 3.261  | 3.152  | 106821    | OARD1   | NM_001289491_17_+_1 |
| Gbp3          | -4.218 | -4.208 | -4.719 | -4.819 | -4.553 | -4.779 | -3.376 | -4.708 | -1.770 | -4.801 | 55932     | GBP4    | NM_001289492_3_+_1  |
| Gbp3          | 4.175  | 2.964  | 2.571  | 7.194  | 3.108  | 4.730  | 4.693  | 6.907  | 5.888  | 6.731  | 55932     | GBP4    | NM_001289493_3_+_1  |
| Txk           | -3.285 | -4.981 | -3.882 | -4.973 | -1.986 | -2.066 | -2.515 | -4.801 | -3.851 | -4.370 | 22165     | TXK     | NM_001289494_5_-_1  |
| Txk           | -2.803 | -4.981 | -3.864 | -3.014 | -3.990 | -4.711 | -4.535 | -4.914 | -3.312 | -3.620 | 22165     | TXK     | NM_001289495_5_-_1  |
| Adgrf4        | -4.981 | -4.981 | -4.567 | -4.948 | -4.104 | -4.935 | -4.397 | -4.945 | -4.423 | -4.981 | 78249     | ADGRF4  | NM_001289499_17_-_1 |
| Adgrf4        | -4.981 | -4.981 | -4.181 | -4.915 | -3.381 | -4.902 | -3.896 | -4.917 | -3.946 | -4.981 | 78249     | ADGRF4  | NM_001289500_17_-_1 |

|            |        |        |        |        |        |        |        |        |        |        |        |            |                    |
|------------|--------|--------|--------|--------|--------|--------|--------|--------|--------|--------|--------|------------|--------------------|
| Adgrf4     | -4.981 | -4.981 | -4.869 | -4.968 | -4.582 | -4.955 | -4.727 | -4.969 | -4.596 | -4.981 | 78249  | ADGRF4     | NM_001289501_17_-1 |
| Ispd       | -4.876 | -4.388 | -4.725 | -4.971 | -4.936 | -4.542 | -4.228 | -4.966 | -4.981 | -4.981 | 75847  | ISPD       | NM_001289502_12_+1 |
| Ispd       | -0.509 | 0.258  | -2.194 | -4.407 | -0.440 | -1.821 | -1.279 | -2.280 | -0.997 | -2.557 | 75847  | ISPD       | NM_001289503_12_+1 |
| Ispd       | 2.027  | 2.338  | 0.835  | -0.286 | -0.089 | -0.314 | -0.847 | -0.400 | -0.418 | 0.415  | 75847  | ISPD       | NM_001289504_12_+1 |
| Dcstamp    | -4.919 | -4.981 | -1.653 | -1.446 | -2.851 | -3.985 | -4.440 | -3.256 | -4.862 | -4.941 | 75766  | DCSTAMP    | NM_001289506_15_+1 |
| Tfr2       | -4.981 | -4.981 | -4.851 | -2.648 | -4.722 | -2.824 | -4.777 | -1.549 | -4.853 | -4.443 | 50765  | TFR2       | NM_001289507_5_+1  |
| Dcstamp    | -4.788 | -4.981 | -1.862 | -0.584 | -2.211 | -0.135 | -3.149 | -1.853 | -4.689 | -2.287 | 75766  | DCSTAMP    | NM_001289508_15_+1 |
| Tfr2       | -4.981 | -4.981 | -4.942 | -4.643 | -4.736 | -4.849 | -4.818 | -4.771 | -4.879 | -4.534 | 50765  | TFR2       | NM_001289509_5_+1  |
| Tecpr2     | 0.914  | 0.629  | 2.366  | 2.338  | 0.915  | 1.163  | 1.203  | 1.494  | 3.064  | 2.961  | 104859 | TECPR2     | NM_001289510_12_+1 |
| Tfr2       | -4.981 | -4.981 | -4.224 | 0.395  | -2.002 | 0.571  | -1.892 | 1.595  | -3.641 | -0.772 | 50765  | TFR2       | NM_001289511_5_+1  |
| Dcstamp    | -3.563 | -4.981 | -0.864 | 0.579  | -1.827 | -2.409 | -2.954 | -3.214 | -3.022 | -3.700 | 75766  | DCSTAMP    | NM_001289512_15_+1 |
| Dcstamp    | -4.861 | -4.981 | -2.543 | 0.149  | -4.924 | -3.351 | -4.656 | -4.960 | -4.776 | -4.738 | 75766  | DCSTAMP    | NM_001289513_15_+1 |
| Tbc1d1     | -2.090 | -4.981 | -0.280 | -1.348 | 0.125  | -0.768 | 2.443  | 1.985  | 5.309  | 4.585  | 57915  | TBC1D1     | NM_001289514_5_+1  |
| Poli       | 0.100  | 0.726  | 0.668  | 0.409  | 0.296  | 1.355  | -1.078 | -0.211 | 0.177  | -0.954 | 26447  | POLI       | NM_001289515_18_-1 |
| Poli       | 0.084  | 0.401  | -4.153 | -0.962 | -1.154 | -1.316 | 0.336  | -0.355 | -1.462 | -4.650 | 26447  | POLI       | NM_001289516_18_-1 |
| Anapc5     | -4.366 | -3.994 | -4.035 | -4.821 | -4.727 | -3.291 | -4.578 | -4.089 | -4.305 | -2.689 | 59008  | ANAPC5     | NM_001289517_5_-1  |
| Anapc5     | -4.326 | -3.951 | -3.531 | -4.773 | -4.676 | -2.649 | -4.527 | -3.200 | -4.230 | -2.037 | 59008  | ANAPC5     | NM_001289518_5_-1  |
| Anapc5     | 3.279  | 3.737  | 2.441  | 3.139  | 2.839  | 2.432  | 2.541  | 2.450  | 2.402  | 2.198  | 59008  | ANAPC5     | NM_001289519_5_-1  |
| Anapc5     | 2.684  | 3.057  | 2.156  | 1.990  | 1.525  | 0.846  | 1.895  | 2.082  | 2.431  | 2.025  | 59008  | ANAPC5     | NM_001289520_5_-1  |
| Zeb2       | 0.437  | 0.239  | -1.001 | 1.216  | 0.989  | 0.567  | 2.150  | 2.009  | 4.731  | 5.847  | 24136  | ZEB2       | NM_001289521_2_-1  |
| Cad        | 1.286  | -0.603 | -1.877 | -4.693 | -1.208 | -2.709 | -1.749 | -2.937 | -3.977 | -4.408 | 69719  | CAD        | NM_001289522_5_+1  |
| Cad        | 0.136  | 2.148  | -2.115 | -4.633 | -2.057 | -1.913 | -2.459 | -3.561 | -4.001 | -4.495 | 69719  | CAD        | NM_001289523_5_+1  |
| Lrrc40     | 0.340  | -1.506 | 1.790  | 1.250  | -0.776 | -0.975 | 0.603  | -1.175 | -1.541 | -0.059 | 67144  | LRRC40     | NM_001289524_3_+1  |
| Lrrc40     | 1.693  | -1.555 | 2.419  | 2.510  | 2.353  | 1.407  | 1.474  | 1.244  | 0.059  | 0.607  | 67144  | LRRC40     | NM_001289525_3_+1  |
| Tcerg1     | 3.743  | 4.585  | 4.471  | 4.678  | 4.622  | 4.686  | 4.281  | 4.411  | 3.725  | 3.966  | 56070  | TCERG1     | NM_001289526_18_+1 |
| Ankib1     | 3.334  | 3.028  | 4.315  | 3.783  | 3.083  | 3.291  | 2.939  | 2.786  | 4.006  | 3.889  | 70797  | ANKIB1     | NM_001289527_5_-1  |
| Ankib1     | 2.541  | 0.249  | -0.902 | -4.079 | -1.201 | -0.621 | -0.764 | -1.484 | -0.722 | -3.605 | 70797  | ANKIB1     | NM_001289528_5_-1  |
| Ankib1     | 2.317  | 1.146  | -1.160 | -2.982 | -3.007 | -4.557 | -0.516 | -3.509 | -1.885 | -4.489 | 70797  | ANKIB1     | NM_001289529_5_-1  |
| Cndp2      | 2.759  | 2.795  | 1.445  | 3.412  | 3.643  | 2.555  | 4.174  | 4.601  | 6.704  | 6.385  | 66054  | CNDP2      | NM_001289531_18_-1 |
| Fhl2       | -4.981 | -4.981 | -4.323 | -4.706 | -4.998 | -3.110 | -2.626 | -4.198 | -2.288 | -4.981 | 14200  | FHL2       | NM_001289533_1_-1  |
| Stx18      | 0.893  | -0.056 | 0.086  | 0.682  | 0.690  | -0.228 | -0.278 | 0.603  | -0.029 | 1.457  | 71116  | STX18      | NM_001289535_5_+1  |
| Stx18      | 0.353  | 1.535  | -3.123 | -1.021 | -0.514 | -0.424 | -1.282 | -0.073 | -4.761 | -1.405 | 71116  | STX18      | NM_001289536_5_+1  |
| Sh2b1      | -1.725 | -1.623 | -2.693 | -3.387 | -3.749 | -4.831 | -1.362 | -4.807 | -4.813 | -2.302 | 20399  | SH2B1      | NM_001289538_7_-1  |
| Sh2b1      | 4.723  | 3.029  | 3.039  | 3.315  | 3.209  | 3.173  | 2.840  | 2.478  | 3.744  | 3.815  | 20399  | SH2B1      | NM_001289539_7_-1  |
| Sh2b1      | -3.772 | 1.254  | -2.967 | -1.715 | -3.055 | -0.304 | -1.200 | 0.080  | -4.357 | -1.273 | 20399  | SH2B1      | NM_001289540_7_-1  |
| Sh2b1      | 1.620  | 3.060  | -1.066 | 0.237  | 0.436  | 0.290  | 1.757  | 0.841  | 1.806  | -1.413 | 20399  | SH2B1      | NM_001289541_7_-1  |
| Sh2b1      | -4.383 | -4.297 | -4.663 | -4.880 | -4.559 | -4.748 | -3.739 | -4.872 | -4.667 | -4.837 | 20399  | SH2B1      | NM_001289542_7_-1  |
| Brap       | -0.700 | -2.360 | -1.613 | -2.265 | -3.963 | -1.814 | -1.801 | -1.263 | 0.625  | -1.407 | 72399  | BRAP       | NM_001289543_5_+1  |
| Brap       | -1.060 | -0.944 | -2.484 | -2.748 | -1.329 | -0.799 | -0.659 | -1.974 | -1.503 | -1.504 | 72399  | BRAP       | NM_001289544_5_+1  |
| Atxn7l2    | 1.795  | 1.218  | 1.769  | 1.442  | 2.583  | 2.118  | 2.193  | 1.559  | 2.451  | 2.376  | 72522  | ATXN7L2    | NM_001289545_3_-1  |
| St6galnac6 | -3.938 | -3.476 | -3.721 | -1.503 | -4.082 | -4.187 | -1.555 | -0.009 | -1.451 | -1.254 | 50935  | ST6GALNAC6 | NM_001289547_2_+1  |
| St6galnac6 | -1.677 | -1.118 | 0.375  | 0.573  | 1.084  | 0.641  | 1.630  | 1.636  | 2.907  | 2.808  | 50935  | ST6GALNAC6 | NM_001289548_2_+1  |
| St6galnac6 | -4.594 | -4.341 | -0.809 | 0.223  | 0.402  | -0.837 | 0.798  | 1.010  | 2.459  | 2.272  | 50935  | ST6GALNAC6 | NM_001289549_2_+1  |
| Tgfb1i1    | -3.978 | -4.213 | -4.243 | -3.458 | -4.691 | -3.558 | -4.682 | -4.177 | -4.379 | -4.596 | 21804  | TGFB1I1    | NM_001289550_7_+1  |
| Tgfb1i1    | -4.164 | -2.060 | -4.290 | -3.329 | -4.768 | -4.873 | -4.727 | -4.065 | -4.367 | -4.580 | 21804  | TGFB1I1    | NM_001289551_7_+1  |
| Tgfb1i1    | -1.584 | -1.157 | -1.657 | -2.501 | -2.695 | -3.171 | -4.890 | -3.190 | -2.658 | -2.576 | 21804  | TGFB1I1    | NM_001289552_7_+1  |
| Tgfb1i1    | -2.920 | -2.477 | -2.540 | -4.096 | -3.966 | -3.926 | -2.808 | -4.420 | -3.699 | -3.658 | 21804  | TGFB1I1    | NM_001289553_7_+1  |
| Styxl1     | -4.981 | -4.981 | -3.961 | -4.706 | -2.957 | -3.333 | -3.590 | -4.802 | -4.981 | -4.981 | 76571  | STYXL1     | NM_001289554_5_-1  |
| Styxl1     | -4.981 | -4.981 | -3.887 | -4.657 | -2.456 | -2.837 | -3.264 | -4.779 | -4.981 | -4.981 | 76571  | STYXL1     | NM_001289555_5_-1  |
| Styxl1     | -2.413 | -4.775 | -3.423 | -3.364 | -4.928 | -4.965 | -4.128 | -4.973 | -4.981 | -4.981 | 76571  | STYXL1     | NM_001289556_5_-1  |
| Styxl1     | -4.981 | -3.315 | -4.032 | -3.971 | -1.323 | -1.537 | -2.931 | -3.887 | -4.981 | -4.981 | 76571  | STYXL1     | NM_001289557_5_-1  |
| Pomgnt2    | -4.588 | -4.981 | -4.779 | -4.877 | -4.913 | -4.969 | -4.898 | -4.950 | -4.981 | -4.793 | 215494 | POMGNT2    | NM_001289558_9_-1  |
| Pomgnt2    | -4.098 | -4.981 | -4.265 | -3.126 | -4.747 | -4.918 | -4.022 | -3.778 | -4.981 | -4.267 | 215494 | POMGNT2    | NM_001289559_9_-1  |
| Pomgnt2    | -4.576 | -4.981 | -4.770 | -4.872 | -4.910 | -4.969 | -4.895 | -4.948 | -4.981 | -4.784 | 215494 | POMGNT2    | NM_001289560_9_-1  |
| Mpv17l     | -4.616 | -0.918 | -4.667 | -4.863 | -4.855 | -4.317 | -4.734 | -4.930 | -4.718 | -4.925 | 93734  | MPV17L     | NM_001289561_16_+1 |
| Mpv17l     | -0.673 | 0.704  | 1.765  | 1.101  | 0.812  | 0.713  | 1.014  | 1.500  | 0.178  | 0.024  | 93734  | MPV17L     | NM_001289562_16_+1 |
| Mpv17l     | 2.442  | 1.519  | 3.271  | 2.803  | 1.888  | 1.673  | 1.928  | 1.159  | 0.743  | 0.767  | 93734  | MPV17L     | NM_001289563_16_+1 |
| Mpv17l     | -1.978 | -2.157 | -1.669 | -2.391 | -2.940 | -3.473 | -2.776 | -3.866 | -3.034 | -3.460 | 93734  | MPV17L     | NM_001289565_16_+1 |
| Mpv17l     | -4.540 | -4.366 | -4.705 | -4.883 | -4.895 | -4.958 | -4.743 | -4.936 | -4.706 | -4.917 | 93734  | MPV17L     | NM_001289567_16_+1 |
| Sass6      | -2.276 | -4.253 | -4.548 | -4.835 | -1.164 | -2.030 | -0.223 | -2.186 | -4.496 | -4.787 | 72776  | SASS6      | NM_001289568_3_+1  |
| Rpap2      | -1.015 | 0.193  | 0.206  | -1.393 | 0.257  | -0.897 | 0.675  | -0.624 | 0.658  | 0.181  | 231571 | RPAP2      | NM_001289569_5_+1  |
| Rpap2      | -0.753 | -1.869 | -0.750 | -2.238 | -2.552 | -1.422 | -2.497 | -2.271 | -0.350 | -1.770 | 231571 | RPAP2      | NM_001289570_5_+1  |
| Sass6      | -2.456 | -3.858 | -3.124 | -2.958 | -3.309 | -4.956 | -4.804 | -4.030 | -4.332 | -4.535 | 72776  | SASS6      | NM_001289571_3_+1  |
| Spata7     | -0.035 | -3.808 | -1.729 | -2.189 | -1.137 | -1.958 | -1.659 | -2.946 | -2.380 | -3.604 | 104871 | SPATA7     | NM_001289572_12_+1 |
| Spata7     | -0.677 | -1.195 | -3.344 | -4.773 | -3.082 | -4.629 | -3.408 | -2.031 | -2.004 | -4.981 | 104871 | SPATA7     | NM_001289573_12_+1 |
| Spata7     | -0.387 | 1.200  | -0.914 | -1.336 | -3.118 | -1.235 | -3.903 | -3.509 | -4.899 | -2.717 | 104871 | SPATA7     | NM_001289574_12_+1 |
| Tsc1       | -1.647 | 1.528  | -1.506 | -0.455 | -1.078 | -0.386 | 0.613  | -2.020 | -1.275 | -0.137 | 64930  | TSC1       | NM_001289575_2_+1  |
| Tsc1       | 2.211  | 2.562  | 2.257  | 2.435  | 2.174  | 2.281  | 2.587  | 2.016  | 3.054  | 2.904  | 64930  | TSC1       | NM_001289576_2_+1  |
| Chfr       | 3.900  | 4.120  | 4.518  | 4.747  | 4.667  | 4.704  | 4.485  | 4.774  | 5.660  | 5.857  | 231600 | CHFR       | NM_001289577_5_+1  |
| Chfr       | -4.174 | -0.124 | 0.574  | 1.328  | 0.024  | 1.790  | 0.429  | 0.697  | 0.493  | 1.214  | 231600 | CHFR       | NM_001289578_5_+1  |
| Chfr       | 2.445  | 0.028  | 3.444  | 1.474  | 3.146  | 1.199  | 2.226  | 1.496  | 4.304  | 2.631  | 231600 | CHFR       | NM_001289579_5_+1  |
| Chfr       | 0.292  | -4.336 | 1.144  | -0.214 | 1.700  | 0.912  | 1.032  | -0.647 | 1.083  | 0.720  | 231600 | CHFR       | NM_001289580_5_+1  |
| Liph       | -4.952 | -4.981 | -4.953 | -4.888 | -4.718 | -4.887 | -4.506 | -4.901 | -4.358 | -4.358 | 239759 | LIPH       | NM_001289581_16_-1 |
| Liph       | -4.381 | -4.981 | -4.795 | -4.790 | -4.587 | -4.249 | -4.282 | -4.078 | -2.761 | -4.673 | 239759 | LIPH       | NM_001289582_16_-1 |

|               |        |        |        |        |        |        |        |        |        |        |        |          |                     |
|---------------|--------|--------|--------|--------|--------|--------|--------|--------|--------|--------|--------|----------|---------------------|
| Sytl2         | -4.981 | -4.981 | -4.981 | -4.981 | -4.981 | -4.981 | -4.923 | -4.949 | -4.981 | -4.981 | 83671  | SYTL2    | NM_001289583_7_+_1  |
| Sytl2         | -4.981 | -4.981 | -4.981 | -4.981 | -4.980 | -4.980 | -4.659 | -4.961 | -4.981 | -4.981 | 83671  | SYTL2    | NM_001289584_7_+_1  |
| Sytl2         | -4.981 | -4.981 | -4.980 | -4.966 | -4.981 | -4.980 | -4.613 | -4.904 | -4.661 | -4.981 | 83671  | SYTL2    | NM_001289585_7_+_1  |
| Sytl2         | -4.981 | -4.981 | -4.978 | -4.934 | -4.981 | -4.978 | -4.505 | -4.874 | -4.566 | -4.981 | 83671  | SYTL2    | NM_001289586_7_+_1  |
| Glycam1       | -4.981 | -4.981 | -4.981 | -4.979 | -4.979 | -4.981 | -4.981 | -4.980 | -4.981 | -4.981 | 14663  | NA       | NM_001289587_15_-_1 |
| Radil         | -4.376 | -2.751 | -4.827 | -4.777 | -4.138 | -4.300 | -4.785 | -4.754 | -4.981 | -4.981 | 231858 | RADIL    | NM_001289588_5_-_1  |
| Zfp12         | 2.620  | 2.583  | 2.900  | 2.091  | 2.826  | 2.791  | 2.342  | 2.739  | 3.771  | 3.962  | 231866 | ZNF12    | NM_001289589_5_+_1  |
| Zfp12         | -3.702 | 1.813  | -0.014 | 0.760  | 0.428  | -1.273 | -0.361 | -0.643 | 1.848  | 2.280  | 231866 | ZNF12    | NM_001289590_5_+_1  |
| Tmem173       | 4.293  | 3.658  | 1.996  | 1.732  | 4.067  | 3.154  | 3.196  | 1.872  | 3.838  | 2.490  | 72512  | TMEM173  | NM_001289591_18_-_1 |
| Tmem173       | 2.578  | 1.715  | -1.327 | -1.157 | 0.981  | 0.469  | 0.322  | 0.287  | 1.096  | -0.389 | 72512  | TMEM173  | NM_001289592_18_-_1 |
| Kynu          | 5.057  | 5.176  | 4.336  | 4.558  | 4.720  | 4.627  | 3.742  | 3.607  | 1.320  | 1.262  | 70789  | KYNU     | NM_001289593_2_+_1  |
| Kynu          | -0.175 | 0.339  | -1.211 | -1.994 | -0.595 | -0.586 | -2.229 | -4.371 | -4.981 | -3.361 | 70789  | KYNU     | NM_001289594_2_+_1  |
| Slc25a40      | 2.335  | 2.620  | 2.008  | 2.031  | 2.320  | 2.455  | 2.325  | 1.621  | 0.767  | 1.394  | 319653 | SLC25A40 | NM_001289595_5_+_1  |
| Slc25a40      | 0.902  | -1.040 | -0.252 | 0.403  | -0.691 | -2.332 | -2.106 | -0.501 | -1.758 | 0.111  | 319653 | SLC25A40 | NM_001289596_5_+_1  |
| Txndc5        | 2.535  | -1.948 | -0.764 | 0.160  | -4.033 | -1.029 | 1.006  | 1.779  | 1.267  | 0.762  | 105245 | TXNDC5   | NM_001289598_13_-_1 |
| Txndc5        | 0.652  | 2.449  | 2.013  | 2.595  | 2.943  | 1.526  | 0.753  | 1.843  | 1.398  | 1.356  | 105245 | TXNDC5   | NM_001289599_13_-_1 |
| Pear1         | -2.156 | -2.028 | -3.055 | -1.568 | -4.951 | -2.506 | -2.133 | -1.509 | -4.515 | -4.035 | 73182  | PEAR1    | NM_001289600_3_-_1  |
| Pear1         | -4.483 | -4.188 | -4.857 | -4.843 | -4.978 | -4.978 | -3.015 | -3.658 | -4.927 | -4.916 | 73182  | PEAR1    | NM_001289601_3_-_1  |
| Psd2          | -3.638 | -4.003 | -4.983 | -4.789 | -4.813 | -4.863 | -4.809 | -4.747 | -3.611 | -4.630 | 74002  | PSD2     | NM_001289602_18_+_1 |
| Tfcp2         | -0.435 | -2.608 | -0.151 | -2.250 | 0.307  | -3.101 | -3.210 | -2.265 | -0.854 | -3.874 | 21422  | TFCP2    | NM_001289603_15_-_1 |
| Klra3         | -4.981 | 0.128  | 1.235  | -2.937 | 1.043  | -2.619 | -0.751 | -2.629 | -1.372 | -2.352 | 16634  | NA       | NM_001289604_6_-_1  |
| Klra3         | -4.981 | -4.635 | 1.097  | -3.847 | 0.856  | -3.677 | -2.242 | -4.794 | -3.972 | -4.539 | 16634  | NA       | NM_001289605_6_-_1  |
| Brd8          | 4.293  | 4.180  | 4.251  | 4.267  | 4.388  | 4.753  | 4.579  | 4.139  | 3.224  | 3.315  | 78656  | BRD8     | NM_001289606_18_-_1 |
| Brd8          | 3.518  | 2.504  | 2.126  | 2.768  | 2.782  | 3.732  | 2.787  | 2.768  | 2.146  | 2.120  | 78656  | BRD8     | NM_001289607_18_-_1 |
| Tasp1         | 3.166  | 3.366  | 2.082  | 1.764  | 1.855  | 2.089  | 1.557  | 1.146  | 1.082  | 1.091  | 75812  | TASP1    | NM_001289611_2_-_1  |
| Zap70         | -4.981 | -4.981 | -3.638 | -2.887 | -4.001 | -1.569 | -2.028 | -2.870 | -4.981 | -4.342 | 22637  | ZAP70    | NM_001289612_1_+_1  |
| Celf3         | -4.981 | -4.981 | -4.964 | -4.964 | -4.981 | -4.981 | -4.981 | -4.981 | -4.981 | -4.981 | 78784  | CELF3    | NM_001289613_3_+_1  |
| Btn2a2        | -4.163 | -4.981 | -4.937 | -3.039 | -0.932 | -1.485 | -3.406 | -3.248 | -4.981 | -4.981 | 238555 | BTN2A2   | NM_001289614_13_-_1 |
| Btn2a2        | -2.776 | -4.981 | -4.385 | -3.630 | -0.281 | -2.320 | -2.879 | -3.351 | -4.981 | -4.981 | 238555 | BTN2A2   | NM_001289615_13_-_1 |
| Celf3         | -4.626 | -4.251 | -4.866 | -4.971 | -4.889 | -4.975 | -4.808 | -4.938 | -4.264 | -4.802 | 78784  | CELF3    | NM_001289616_3_+_1  |
| Zyx           | 2.188  | 2.999  | 1.700  | 1.931  | 0.990  | 1.618  | 2.866  | 2.627  | 3.803  | 3.488  | 22793  | ZYX      | NM_001289617_6_+_1  |
| Zyx           | 1.810  | 1.548  | 0.148  | -0.009 | -0.868 | -0.980 | 0.380  | -0.004 | 1.610  | 1.030  | 22793  | ZYX      | NM_001289618_6_+_1  |
| Zyx           | 4.661  | 4.890  | 3.855  | 3.946  | 4.569  | 4.157  | 4.753  | 4.331  | 5.123  | 5.420  | 22793  | ZYX      | NM_001289619_6_+_1  |
| Celf3         | -4.240 | -3.649 | -4.620 | -4.914 | -4.276 | -4.958 | -4.372 | -4.048 | -3.643 | -2.285 | 78784  | CELF3    | NM_001289620_3_+_1  |
| Mynn          | 2.000  | 1.431  | 2.029  | 2.350  | 1.808  | 1.646  | 0.914  | 1.952  | 2.169  | 2.884  | 80732  | MYNN     | NM_001289621_3_+_1  |
| Mynn          | 1.381  | 1.888  | 1.529  | 1.242  | 0.871  | 0.870  | 0.752  | 0.880  | 1.566  | 1.590  | 80732  | MYNN     | NM_001289622_3_+_1  |
| Mynn          | -0.830 | -1.027 | 0.029  | -0.678 | -1.533 | -1.713 | -1.460 | -0.798 | -0.470 | 0.034  | 80732  | MYNN     | NM_001289623_3_+_1  |
| St7           | -0.295 | -0.465 | -2.566 | -1.139 | -2.414 | -3.547 | -1.489 | -3.783 | -0.634 | 0.427  | 64213  | ST7      | NM_001289624_6_+_1  |
| St7           | -1.909 | -0.374 | -4.715 | -3.554 | -4.279 | -4.633 | -4.589 | -3.132 | -1.201 | -4.758 | 64213  | ST7      | NM_001289625_6_+_1  |
| St7           | 3.989  | 4.796  | 1.804  | 2.287  | 2.145  | 2.355  | 2.195  | 2.761  | 3.156  | 2.926  | 64213  | ST7      | NM_001289626_6_+_1  |
| St7           | -3.361 | -2.522 | -4.712 | -3.075 | -4.595 | -3.763 | -4.567 | -4.455 | -4.312 | -2.381 | 64213  | ST7      | NM_001289627_6_+_1  |
| St7           | -0.459 | 2.033  | -2.572 | 1.018  | -1.822 | 0.300  | -2.161 | 0.572  | -0.485 | 0.038  | 64213  | ST7      | NM_001289629_6_+_1  |
| Mgme1         | -0.231 | -4.402 | 0.059  | -0.216 | -4.897 | -0.410 | -0.067 | -0.967 | -2.263 | -0.864 | 74528  | MGME1    | NM_001289630_2_+_1  |
| Mgme1         | 0.819  | 2.670  | -0.141 | 1.406  | 1.583  | 0.306  | 2.272  | 2.990  | 2.494  | 2.781  | 74528  | MGME1    | NM_001289631_2_+_1  |
| Zfp180        | 1.141  | -3.905 | -1.044 | -1.803 | 1.177  | 0.585  | -1.076 | -0.410 | 1.729  | 0.976  | 210135 | ZNF180   | NM_001289634_7_+_1  |
| Zfp180        | 2.543  | 2.116  | 0.546  | 1.219  | 0.481  | 1.330  | 1.560  | 2.491  | 1.961  | 2.872  | 210135 | ZNF180   | NM_001289637_7_+_1  |
| Zfp180        | -3.253 | -2.956 | -3.808 | -2.889 | -3.190 | -4.735 | -3.459 | -4.566 | -3.279 | -4.319 | 210135 | ZNF180   | NM_001289640_7_+_1  |
| Zfp180        | -3.186 | -3.089 | -0.347 | -3.939 | -1.693 | -4.710 | -3.269 | -4.348 | -3.915 | -4.291 | 210135 | ZNF180   | NM_001289641_7_+_1  |
| Pxylp1        | 0.309  | -1.731 | -3.665 | -4.536 | -3.840 | -4.923 | -4.152 | -3.753 | -2.845 | -2.920 | 235534 | PXYLP1   | NM_001289645_9_-_1  |
| Pxylp1        | -3.741 | -2.929 | -0.142 | 0.248  | -1.451 | -2.985 | -1.270 | -0.953 | 1.543  | -1.396 | 235534 | PXYLP1   | NM_001289646_9_-_1  |
| Pxylp1        | 4.901  | 4.866  | 2.274  | 2.774  | 3.204  | 2.401  | 3.555  | 2.864  | 3.510  | 3.139  | 235534 | PXYLP1   | NM_001289647_9_-_1  |
| Stard6        | -3.003 | -2.789 | -1.953 | -2.483 | -4.005 | -4.505 | -2.342 | -4.170 | -4.178 | -4.196 | 170461 | STARD6   | NM_001289648_18_+_1 |
| Stard6        | 0.229  | -0.645 | 0.025  | 0.430  | -0.500 | -0.533 | -0.954 | -0.700 | -3.010 | -1.585 | 170461 | STARD6   | NM_001289649_18_+_1 |
| Stard6        | -3.684 | -3.185 | -2.880 | -3.270 | -4.448 | -2.369 | -4.520 | -4.643 | -4.347 | -4.434 | 170461 | STARD6   | NM_001289650_18_+_1 |
| Gid8          | 2.924  | 3.109  | 2.011  | 2.232  | 1.719  | -0.196 | -0.062 | 1.703  | 1.572  | 0.761  | 76425  | GID8     | NM_001289651_2_+_1  |
| Gid8          | 5.704  | 6.067  | 5.969  | 5.811  | 5.508  | 5.657  | 5.422  | 5.540  | 5.193  | 5.311  | 76425  | GID8     | NM_001289652_2_+_1  |
| Fhod3         | -4.981 | -4.981 | -4.969 | -4.969 | -3.174 | -4.475 | -4.972 | -3.422 | -4.981 | -3.480 | 225288 | FHOD3    | NM_001289654_18_+_1 |
| Agbl3         | -4.874 | -1.555 | -3.688 | -4.539 | -4.531 | -4.588 | -4.292 | -4.623 | -4.529 | -4.542 | 76223  | AGBL3    | NM_001289656_6_+_1  |
| Agbl3         | -0.017 | -0.571 | -1.229 | -2.873 | -3.561 | -3.936 | -3.875 | -3.080 | -2.793 | -2.943 | 76223  | AGBL3    | NM_001289657_6_+_1  |
| Agbl3         | 2.618  | 2.473  | 1.572  | 0.888  | 0.749  | 1.162  | 0.934  | 0.376  | 0.108  | -0.151 | 76223  | AGBL3    | NM_001289658_6_+_1  |
| 2810474019Rik | 3.921  | 3.550  | 4.042  | 3.990  | 4.625  | 4.513  | 4.075  | 3.526  | 3.529  | 4.065  | 67246  | KIAA1551 | NM_001289661_6_+_1  |
| 2810474019Rik | 3.723  | 3.847  | 3.508  | 3.676  | 4.500  | 4.024  | 4.046  | 4.189  | 4.292  | 2.745  | 67246  | KIAA1551 | NM_001289662_6_+_1  |
| Tmem241       | 3.723  | 3.708  | 2.501  | 2.479  | 3.009  | 2.735  | 2.942  | 2.716  | 3.549  | 3.145  | 338363 | TMEM241  | NM_001289666_18_-_1 |
| Tmem241       | -4.841 | -4.867 | -3.405 | -3.315 | -4.408 | -4.962 | -4.833 | -3.982 | -4.765 | -4.928 | 338363 | TMEM241  | NM_001289667_18_-_1 |
| Sidt2         | -1.829 | 0.377  | -0.092 | 0.234  | 1.874  | 0.697  | 1.348  | 0.631  | 4.152  | 4.125  | 214597 | SIDT2    | NM_001289668_9_-_1  |
| Arhgap33      | 0.100  | -0.515 | -1.699 | -3.322 | 0.266  | -1.380 | -0.854 | -1.021 | -2.225 | -0.861 | 233071 | ARHGAP33 | NM_001289670_7_-_1  |
| Kctd17        | -4.919 | -4.753 | -4.840 | -4.952 | -3.009 | -4.944 | -4.740 | -4.378 | -4.829 | -4.700 | 72844  | KCTD17   | NM_001289671_15_+_1 |
| Kctd17        | -4.876 | -4.417 | -4.454 | -4.842 | -3.810 | -1.736 | -4.362 | -3.268 | -2.311 | -1.076 | 72844  | KCTD17   | NM_001289672_15_+_1 |
| Kctd17        | 2.095  | 1.393  | 2.228  | 2.194  | 2.171  | 1.966  | 2.283  | 1.766  | 2.206  | 1.691  | 72844  | KCTD17   | NM_001289673_15_+_1 |
| Pacsin3       | -4.981 | -3.710 | -2.934 | -3.274 | -4.214 | -4.687 | -3.947 | -4.391 | -4.619 | -4.516 | 80708  | PAC3IN3  | NM_001289677_2_+_1  |
| Pacsin3       | -3.362 | -3.688 | -1.832 | -3.249 | -4.114 | -3.337 | -3.765 | -4.363 | -4.613 | -4.507 | 80708  | PAC3IN3  | NM_001289678_2_+_1  |
| Arntl2        | -3.826 | -3.991 | -4.977 | -4.977 | -4.597 | -4.289 | -4.894 | -4.709 | -3.863 | -4.740 | 272322 | ARNTL2   | NM_001289679_6_+_1  |
| Arntl2        | -3.861 | -4.084 | -4.972 | -4.972 | -4.620 | -4.117 | -4.894 | -4.714 | -3.892 | -4.751 | 272322 | ARNTL2   | NM_001289680_6_+_1  |
| Arntl2        | -1.564 | -2.781 | -4.310 | -4.989 | -2.501 | -4.391 | -4.186 | -3.697 | -2.632 | -4.458 | 272322 | ARNTL2   | NM_001289681_6_+_1  |

|               |        |        |        |        |        |        |        |        |        |        |        |            |                    |
|---------------|--------|--------|--------|--------|--------|--------|--------|--------|--------|--------|--------|------------|--------------------|
| Arhgap33      | -3.136 | -2.818 | -4.269 | -3.263 | -1.384 | -4.748 | -2.747 | -4.592 | -4.364 | -4.389 | 233071 | ARHGAP33   | NM_001289682_7_-1  |
| Prrg1         | -4.400 | -4.981 | -4.246 | -4.670 | -1.951 | -4.821 | -4.625 | -4.893 | -4.888 | -4.040 | 546336 | PRRG1      | NM_001289683_X_-1  |
| Jade3         | -3.816 | -2.903 | -4.077 | -4.486 | -4.388 | -4.869 | -4.131 | -4.871 | -4.230 | -4.598 | 382207 | JADE3      | NM_001289684_X_+1  |
| Arhgef3       | -0.969 | -4.433 | 0.546  | 1.426  | 2.183  | 1.404  | 1.445  | -0.015 | -3.797 | -4.124 | 71704  | ARHGEF3    | NM_001289686_14_+1 |
| Arhgef3       | 3.910  | 3.951  | 3.003  | 2.769  | 4.558  | 4.346  | 5.602  | 5.850  | 7.186  | 7.130  | 71704  | ARHGEF3    | NM_001289687_14_+1 |
| Arhgef3       | -4.580 | -0.212 | -3.111 | -3.610 | -1.013 | -3.439 | -0.632 | -1.786 | -0.466 | -0.043 | 71704  | ARHGEF3    | NM_001289688_14_+1 |
| Zfp740        | 3.411  | 2.553  | 3.997  | 3.139  | 4.389  | 3.890  | 3.818  | 3.192  | 4.819  | 4.523  | 68744  | NA         | NM_001289690_15_+1 |
| Zfp740        | 3.759  | 3.311  | 3.419  | 4.152  | 3.854  | 4.526  | 4.435  | 4.828  | 5.811  | 5.850  | 68744  | NA         | NM_001289691_15_+1 |
| Ntn5          | -4.981 | -4.981 | -4.921 | -4.821 | -4.971 | -4.980 | -4.921 | -4.977 | -4.981 | -4.981 | 243967 | NTN5       | NM_001289692_7_+1  |
| Ntn5          | -4.981 | -4.981 | -3.061 | -4.473 | -0.690 | -0.114 | -2.103 | -3.565 | -4.981 | -4.981 | 243967 | NTN5       | NM_001289693_7_+1  |
| Zfp740        | 2.225  | 1.257  | 1.047  | 1.080  | 2.680  | 2.013  | 2.658  | 1.229  | 2.678  | 1.115  | 68744  | NA         | NM_001289694_15_+1 |
| Zfp740        | -1.092 | 3.322  | 2.901  | 1.765  | 2.584  | 2.243  | 3.417  | 2.614  | 2.972  | 3.987  | 68744  | NA         | NM_001289695_15_+1 |
| Zc4h2         | -3.798 | -2.674 | -4.593 | -4.675 | -4.834 | -4.969 | -2.377 | -4.938 | -4.822 | -4.785 | 245522 | ZC4H2      | NM_001289696_X_-1  |
| Zc4h2         | -4.955 | -1.421 | -2.375 | -4.663 | -3.482 | -4.872 | -3.680 | -2.473 | -4.630 | -4.782 | 245522 | ZC4H2      | NM_001289697_X_-1  |
| Prrt3         | -2.493 | -0.644 | -3.797 | -4.282 | -4.345 | -4.694 | -3.864 | -4.652 | -3.350 | -4.124 | 210673 | PRRT3      | NM_001289699_6_-1  |
| Prrt3         | 3.021  | 2.455  | -0.345 | -0.851 | -0.652 | -0.366 | -0.650 | -1.415 | -1.900 | -0.965 | 210673 | PRRT3      | NM_001289700_6_-1  |
| Pde4dip       | -3.506 | -4.193 | -3.515 | -3.782 | 1.058  | -1.453 | -2.860 | -4.003 | -4.290 | -4.370 | 83679  | PDE4DIP    | NM_001289701_3_-1  |
| Pde4dip       | -0.977 | -3.568 | -0.052 | 0.691  | 3.208  | 3.507  | 2.038  | 1.085  | -1.713 | -1.803 | 83679  | PDE4DIP    | NM_001289702_3_-1  |
| Cflar         | 2.094  | 2.548  | 4.397  | 4.088  | 3.609  | 3.711  | 3.163  | 3.471  | 3.278  | 4.057  | 12633  | CFLAR      | NM_001289704_1_+1  |
| Clec2i        | 1.438  | -3.816 | 0.320  | -4.690 | 0.129  | -3.221 | 0.324  | -4.881 | 2.470  | 0.817  | 93675  | NA         | NM_001289706_6_+1  |
| Clec2i        | 4.696  | 2.204  | 3.467  | 3.230  | 4.338  | 3.041  | 4.456  | 2.936  | 5.609  | 5.174  | 93675  | NA         | NM_001289707_6_+1  |
| Clec2i        | 2.558  | 1.240  | -0.473 | 0.996  | 1.023  | 0.783  | -0.087 | -1.974 | 1.492  | 1.453  | 93675  | NA         | NM_001289708_6_+1  |
| Sh3glb2       | 2.213  | 1.481  | 1.471  | 1.648  | 0.952  | 1.631  | 0.694  | 0.986  | 1.998  | 2.316  | 227700 | SH3GLB2    | NM_001289709_2_-1  |
| Sh3glb2       | -4.727 | -1.968 | -1.197 | -2.360 | -1.576 | -2.423 | -0.202 | -1.605 | 0.239  | -1.448 | 227700 | SH3GLB2    | NM_001289710_2_-1  |
| L3mbtl2       | -4.896 | -4.981 | -3.528 | -4.908 | -4.897 | -4.968 | -4.725 | -4.739 | -4.783 | -4.844 | 214669 | L3MBTL2    | NM_001289711_15_+1 |
| L3mbtl2       | -3.458 | 0.929  | -1.013 | -0.503 | -0.255 | -1.146 | -0.297 | -3.181 | 0.826  | -4.364 | 214669 | L3MBTL2    | NM_001289712_15_+1 |
| Bcl2l1        | 0.024  | -4.168 | 0.206  | 0.639  | 1.286  | -0.474 | -0.778 | -1.914 | 0.307  | -1.352 | 12048  | BCL2L1     | NM_001289716_2_-1  |
| Bcl2l1        | -3.347 | -2.237 | -2.970 | -3.798 | -2.132 | -4.717 | -3.168 | -4.445 | -3.690 | -4.445 | 12048  | BCL2L1     | NM_001289717_2_-1  |
| Ampd2         | 2.067  | 2.728  | 1.933  | 2.356  | 1.924  | 2.238  | 2.288  | 1.281  | 2.849  | 2.260  | 109674 | AMPD2      | NM_001289719_3_-1  |
| Ampd2         | -1.725 | 0.092  | 0.392  | 1.926  | 1.655  | 1.210  | 1.467  | 1.269  | 3.352  | 3.007  | 109674 | AMPD2      | NM_001289720_3_-1  |
| Wipf1         | 3.786  | 1.673  | 2.553  | 2.602  | 4.376  | 3.948  | 3.422  | 3.152  | 2.959  | 2.612  | 215280 | WIPF1      | NM_001289722_2_-1  |
| Wipf1         | 4.403  | 4.716  | 5.131  | 5.113  | 5.730  | 5.857  | 5.594  | 5.200  | 5.371  | 6.243  | 215280 | WIPF1      | NM_001289723_2_-1  |
| Slbp          | 0.700  | 2.272  | 0.032  | 1.408  | 1.302  | 1.151  | 0.222  | -0.240 | 0.107  | -0.099 | 20492  | SLBP       | NM_001289724_5_-1  |
| Slbp          | 2.978  | 1.909  | 2.416  | 2.413  | 2.306  | 1.425  | 2.540  | 2.586  | 2.445  | 1.780  | 20492  | SLBP       | NM_001289725_5_-1  |
| Gapdh         | 8.154  | 8.371  | 8.755  | 9.261  | 8.883  | 8.949  | 8.674  | 8.930  | 8.717  | 8.634  | 14433  | GAPDH      | NM_001289726_6_-1  |
| Tmem255a      | -0.005 | 0.635  | 0.242  | -2.218 | -1.604 | -1.137 | 0.021  | -0.536 | -2.672 | -1.137 | 245386 | TMEM255A   | NM_001289727_X_-1  |
| Tmem255a      | -2.225 | -2.765 | -3.195 | -3.723 | -3.094 | -2.837 | -4.911 | -4.419 | -4.981 | -3.962 | 245386 | TMEM255A   | NM_001289728_X_-1  |
| Xpnpep2       | -4.981 | -4.200 | -4.394 | -4.908 | -4.933 | -4.965 | -4.881 | -4.965 | -4.871 | -4.838 | 170745 | XPNPEP2    | NM_001289729_X_+1  |
| Dach2         | -4.981 | -4.981 | -4.954 | -4.579 | -4.369 | -4.968 | -4.840 | -4.968 | -4.981 | -3.955 | 93837  | DACH2      | NM_001289732_X_+1  |
| Dach2         | -4.981 | -4.981 | -4.977 | -4.956 | -4.890 | -4.982 | -4.958 | -4.972 | -4.981 | -4.769 | 93837  | DACH2      | NM_001289734_X_+1  |
| Nxf2          | -2.379 | -4.830 | -4.881 | -4.837 | -1.827 | -2.062 | -1.767 | -3.022 | -3.160 | -2.251 | 83454  | NXF2 NXF2B | NM_001289735_X_-1  |
| Nxf2          | -0.528 | -1.624 | -3.667 | -2.859 | -0.646 | -2.372 | -1.309 | -1.016 | -3.191 | -2.569 | 83454  | NXF2 NXF2B | NM_001289736_X_-1  |
| 6820408C15Rik | -2.536 | -2.892 | -3.419 | -2.990 | -4.937 | -4.535 | -4.938 | -4.294 | -4.091 | -4.981 | 228778 | C20orf96   | NM_001289738_2_+1  |
| Bcl2l1        | -4.981 | -4.981 | -4.981 | -4.981 | -4.972 | -4.972 | -4.981 | -4.981 | -4.981 | -4.981 | 12048  | BCL2L1     | NM_001289739_2_-1  |
| Mturn         | 0.079  | 0.666  | -0.826 | 1.000  | -0.513 | 0.163  | 0.777  | 1.579  | -0.737 | 1.234  | 68235  | NA         | NM_001289740_6_+1  |
| Mturn         | -1.193 | -4.873 | -3.578 | -4.521 | -3.666 | -4.188 | -2.204 | -4.967 | -2.420 | -2.533 | 68235  | NA         | NM_001289741_6_+1  |
| Lrrc4c        | -4.858 | -4.981 | -4.975 | -4.975 | -4.981 | -4.981 | -4.979 | -4.978 | -4.981 | -4.981 | 241568 | LRRC4C     | NM_001289742_2_+1  |
| Lrrc4c        | -4.662 | -4.981 | -4.970 | -4.970 | -4.977 | -4.981 | -4.975 | -4.971 | -4.981 | -4.981 | 241568 | LRRC4C     | NM_001289743_2_+1  |
| Lrrc4c        | -1.813 | -3.558 | -1.620 | -2.836 | -2.518 | -4.603 | -1.661 | -4.889 | -4.981 | -4.981 | 241568 | LRRC4C     | NM_001289744_2_+1  |
| Tgm6          | -4.911 | -4.981 | -4.875 | -4.827 | -4.890 | -4.891 | -4.912 | -3.883 | -4.981 | -4.975 | 241636 | TGM6       | NM_001289747_2_+1  |
| Tgm6          | -4.851 | -4.981 | -3.893 | -3.657 | -3.792 | -4.912 | -4.939 | -4.976 | -4.981 | -4.965 | 241636 | TGM6       | NM_001289748_2_+1  |
| Tgm6          | -3.189 | -4.981 | -4.071 | -4.649 | -3.827 | -0.480 | -2.385 | -2.561 | -4.981 | -2.609 | 241636 | TGM6       | NM_001289749_2_+1  |
| Rnf32         | -4.981 | -4.981 | -4.968 | -4.738 | -4.981 | -4.979 | -4.977 | -4.787 | -4.981 | -4.981 | 56874  | RNF32      | NM_001289757_5_+1  |
| Rarb          | -4.842 | -4.757 | -4.918 | -4.975 | -4.971 | -4.980 | -4.981 | -4.981 | -4.981 | -4.973 | 218772 | RARB       | NM_001289760_14_-1 |
| Rarb          | -4.790 | -4.701 | -4.898 | -4.972 | -4.624 | -4.965 | -4.981 | -4.981 | -4.969 | -4.967 | 218772 | RARB       | NM_001289761_14_-1 |
| Rarb          | -1.419 | -2.126 | -2.133 | -4.251 | -4.327 | -4.934 | -3.661 | -4.929 | -4.822 | -2.084 | 218772 | RARB       | NM_001289762_14_-1 |
| Spink2        | -4.981 | -2.681 | -4.886 | -3.669 | -4.951 | -4.839 | -4.977 | -3.408 | -4.715 | -4.946 | 69982  | NA         | NM_001289764_5_-1  |
| Zap70         | -4.477 | -3.899 | -4.921 | -4.455 | -4.924 | -4.926 | -4.842 | -4.968 | -4.981 | -4.981 | 22637  | ZAP70      | NM_001289765_1_+1  |
| Zap70         | -4.078 | -3.059 | -4.873 | -3.687 | -4.599 | -4.309 | -4.349 | -1.816 | -4.981 | -4.981 | 22637  | ZAP70      | NM_001289766_1_+1  |
| Spink2        | -4.981 | -4.875 | -4.981 | -4.978 | -4.981 | -4.981 | -4.401 | -4.937 | -3.325 | -4.981 | 69982  | NA         | NM_001289767_5_-1  |
| Spink2        | -4.981 | -4.834 | -4.980 | -4.975 | -4.981 | -4.981 | -4.981 | -4.980 | -4.981 | -0.731 | 69982  | NA         | NM_001289768_5_-1  |
| Exoc1         | -3.990 | -3.474 | -3.865 | -1.240 | -0.830 | -1.189 | -1.738 | 0.212  | -1.277 | -4.595 | 69940  | EXOC1      | NM_001289770_5_+1  |
| Exoc1         | 4.369  | 4.448  | 5.123  | 4.916  | 5.120  | 5.042  | 4.919  | 4.900  | 5.229  | 5.190  | 69940  | EXOC1      | NM_001289771_5_+1  |
| Rufy3         | 2.493  | 3.011  | 4.131  | 4.207  | 5.085  | 5.108  | 4.486  | 4.468  | 4.871  | 5.023  | 52822  | RUFY3      | NM_001289774_5_+1  |
| Rufy3         | -0.409 | -0.467 | 0.858  | 0.406  | 2.311  | 2.027  | 1.411  | 0.815  | 2.088  | 1.673  | 52822  | RUFY3      | NM_001289775_5_+1  |
| Rufy3         | -4.409 | -4.592 | -4.749 | -4.964 | -4.714 | -2.707 | -4.726 | -4.914 | -4.058 | -4.303 | 52822  | RUFY3      | NM_001289776_5_+1  |
| Rufy3         | -2.077 | -4.388 | -3.882 | -3.317 | -2.141 | -3.384 | -4.910 | -4.965 | -4.467 | -1.471 | 52822  | RUFY3      | NM_001289777_5_+1  |
| Pus7          | -4.186 | -0.825 | -2.555 | -4.248 | -4.504 | -4.629 | -2.986 | -4.308 | -4.387 | -4.452 | 78697  | PUS7       | NM_001289780_5_-1  |
| Pus7          | -4.698 | -4.466 | -4.798 | -3.184 | -4.966 | -4.971 | -4.761 | -4.959 | -4.660 | -4.931 | 78697  | PUS7       | NM_001289781_5_-1  |
| Cryab         | 2.203  | 1.557  | 1.901  | 1.456  | -0.444 | -0.894 | 0.605  | 0.429  | 1.226  | 0.083  | 12955  | CRYAB      | NM_001289782_9_+1  |
| Cryab         | -3.120 | -2.412 | -3.018 | -3.248 | -4.360 | -4.891 | -2.922 | -4.352 | -3.469 | -0.528 | 12955  | CRYAB      | NM_001289784_9_+1  |
| Cryab         | -0.937 | 0.157  | -0.237 | -4.638 | -2.925 | -4.892 | -2.387 | -1.660 | -1.181 | -1.448 | 12955  | CRYAB      | NM_001289785_9_+1  |
| Asic1         | -4.832 | -4.808 | -4.849 | -4.956 | -1.768 | 0.070  | -4.820 | -2.902 | -4.804 | -4.945 | 11419  | ASIC1      | NM_001289791_15_+1 |
| Hadhb         | -2.562 | 0.561  | -0.544 | 0.005  | -1.184 | -2.766 | -2.656 | -4.277 | -0.809 | -0.862 | 231086 | HADHB      | NM_001289798_5_+1  |

|              |        |        |        |        |        |        |        |        |        |        |           |          |                     |
|--------------|--------|--------|--------|--------|--------|--------|--------|--------|--------|--------|-----------|----------|---------------------|
| Hadhb        | 4.507  | 4.517  | 4.391  | 4.439  | 2.942  | 3.356  | 3.037  | 3.463  | 3.855  | 3.704  | 231086    | HADHB    | NM_001289799_5_+_1  |
| Poln         | -2.097 | -4.981 | -3.620 | -2.966 | -2.215 | -4.738 | -2.085 | -4.112 | -1.535 | -4.976 | 272158    | NA       | NM_001289803_5_-_1  |
| Poln         | -2.741 | -3.315 | -2.832 | -2.859 | -2.415 | -3.830 | -1.768 | -3.312 | -4.981 | -2.608 | 272158    | NA       | NM_001289804_5_-_1  |
| Ccdc63       | -0.899 | -2.177 | -3.314 | -4.641 | -4.349 | -4.630 | -4.652 | -4.867 | -4.025 | -4.981 | 330188    | CCDC63   | NM_001289809_5_-_1  |
| Ccdc63       | -4.520 | -4.387 | -4.759 | -4.927 | -4.899 | -4.944 | -4.977 | -4.981 | -4.894 | -4.981 | 330188    | CCDC63   | NM_001289811_5_-_1  |
| Dgcr6        | 4.789  | 4.026  | 1.774  | 2.131  | 1.418  | 1.315  | 1.598  | 1.732  | 0.443  | 0.243  | 13353     | NA       | NM_001289813_16_+_1 |
| Dgcr6        | 6.020  | 5.820  | 3.768  | 3.921  | 2.767  | 3.262  | 2.530  | 3.289  | 2.328  | 2.996  | 13353     | NA       | NM_001289814_16_+_1 |
| Ovol3        | -1.404 | -1.660 | -3.095 | -2.954 | -3.484 | -3.674 | -2.645 | -3.466 | -2.616 | -3.077 | 381867    | OVOL3    | NM_001289817_7_-_1  |
| Clock        | 3.924  | 3.659  | 3.785  | 3.374  | 3.762  | 3.638  | 3.948  | 3.683  | 3.803  | 4.527  | 12753     | CLOCK    | NM_001289826_5_-_1  |
| Nanog        | -4.613 | -4.384 | -4.769 | -4.912 | -3.926 | -4.921 | -4.900 | -4.959 | -4.742 | -4.923 | 71950     | NANOG    | NM_001289828_6_+_1  |
| Nanog        | -2.197 | -1.970 | -3.112 | -3.493 | -2.898 | -3.469 | -3.478 | -3.914 | -3.509 | -3.558 | 71950     | NANOG    | NM_001289830_6_+_1  |
| Nanog        | -0.474 | -0.619 | -1.451 | -1.416 | -0.812 | -0.939 | -1.686 | -2.137 | -2.514 | -1.904 | 71950     | NANOG    | NM_001289831_6_+_1  |
| Zfp473       | -4.154 | -4.760 | -4.615 | -4.231 | -2.926 | -2.571 | -4.170 | -4.305 | -4.981 | -4.957 | 243963    | ZNF473   | NM_001289836_7_-_1  |
| Zfp473       | -3.528 | -4.739 | -4.940 | -3.376 | -3.324 | -2.311 | -3.507 | -4.907 | -4.981 | -4.952 | 243963    | ZNF473   | NM_001289837_7_-_1  |
| Zfp473       | -4.981 | -3.979 | -4.917 | -4.674 | -4.678 | -4.948 | -4.966 | -3.750 | -4.981 | -4.405 | 243963    | ZNF473   | NM_001289838_7_-_1  |
| Zfp473       | -4.981 | -2.407 | -4.705 | -3.964 | -3.249 | -4.842 | -4.963 | -4.719 | -4.981 | -1.936 | 243963    | ZNF473   | NM_001289839_7_-_1  |
| Palb2        | -2.238 | -3.350 | -4.087 | -3.385 | -1.700 | -2.533 | -3.256 | -2.139 | -1.287 | -3.085 | 233826    | PALB2    | NM_001289842_7_-_1  |
| Palb2        | -1.428 | -0.100 | -3.650 | -3.688 | -4.633 | -2.509 | -0.753 | -2.500 | -3.997 | -4.910 | 233826    | PALB2    | NM_001289843_7_-_1  |
| Palb2        | -0.886 | -4.981 | -1.626 | -0.603 | -1.167 | -4.884 | -2.564 | -2.368 | -2.736 | -3.968 | 233826    | PALB2    | NM_001289844_7_-_1  |
| Palb2        | -0.854 | -2.681 | -0.285 | -3.374 | -1.008 | -2.533 | -0.527 | -4.030 | -2.596 | -4.963 | 233826    | PALB2    | NM_001289845_7_-_1  |
| Cox6b2       | -4.365 | -4.861 | -2.550 | -0.766 | -2.615 | -1.882 | -1.389 | 0.547  | -1.623 | -1.001 | 333182    | COX6B2   | NM_001289848_7_-_1  |
| Cox6b2       | -2.562 | -3.186 | -2.633 | -2.828 | -2.476 | -2.706 | -1.009 | -2.284 | -1.421 | -1.407 | 333182    | COX6B2   | NM_001289849_7_-_1  |
| Cox6b2       | -2.408 | -0.799 | -0.612 | -0.898 | -0.986 | -0.185 | 0.491  | 0.777  | 0.011  | -0.361 | 333182    | COX6B2   | NM_001289850_7_-_1  |
| Eps15l1      | 0.943  | 1.373  | 1.980  | 1.833  | 2.011  | 2.272  | 1.889  | 1.691  | 2.869  | 2.714  | 13859     | EPS15L1  | NM_001289859_8_-_1  |
| Per3         | -1.426 | -1.059 | 0.579  | -0.432 | 0.535  | -1.245 | -1.447 | 0.267  | -1.746 | -1.266 | 18628     | PER3     | NM_001289877_4_-_1  |
| Per3         | -3.223 | -2.986 | -3.808 | -4.330 | -1.563 | -0.793 | -2.414 | -3.435 | -3.719 | -4.849 | 18628     | PER3     | NM_001289878_4_-_1  |
| Tns1         | 5.305  | 5.287  | 3.232  | 3.066  | 5.275  | 6.013  | 3.780  | 3.946  | -0.598 | 0.645  | 21961     | TNS1     | NM_001289895_1_-_1  |
| Csnk1e       | 2.966  | 1.733  | 1.672  | 2.295  | 2.775  | 2.395  | 1.423  | 1.518  | 3.130  | 2.539  | 27373     | CSNK1E   | NM_001289898_15_-_1 |
| Csnk1e       | 2.341  | 2.077  | 2.418  | 2.547  | 2.399  | 2.403  | 2.655  | 2.846  | 4.245  | 3.815  | 27373     | CSNK1E   | NM_001289899_15_-_1 |
| Zfp189       | -0.018 | -2.169 | 1.766  | 0.180  | -0.934 | -1.698 | -0.401 | -2.372 | -0.980 | 1.456  | 230162    | ZNF189   | NM_001289901_4_+_1  |
| Cd83         | 1.129  | 1.236  | 7.189  | 6.842  | 6.971  | 6.948  | 6.459  | 5.574  | 1.450  | 1.687  | 12522     | CD83     | NM_001289915_13_+_1 |
| Rora         | 2.440  | 6.905  | 0.115  | 0.314  | 3.008  | 2.337  | 2.468  | 1.589  | 2.428  | 2.679  | 19883     | RORA     | NM_001289916_9_+_1  |
| E2f3         | 2.370  | 0.912  | 1.590  | 1.111  | 0.898  | -0.195 | 1.337  | -0.486 | 1.533  | 1.345  | 13557     | E2F3     | NM_001289920_13_-_1 |
| 201011101Rik | 1.508  | 2.199  | 1.634  | 0.495  | 1.119  | 1.243  | 0.972  | 0.971  | 3.089  | 3.839  | 72061     | C9orf3   | NM_001289924_13_+_1 |
| Egr3         | -3.891 | -3.215 | -0.550 | -1.951 | -0.812 | 0.378  | -3.693 | -4.508 | -3.324 | -4.343 | 13655     | EGR3     | NM_001289925_14_+_1 |
| 201011101Rik | 3.069  | 3.284  | 1.741  | 1.692  | 1.738  | 1.174  | 2.196  | 2.241  | 2.331  | 2.442  | 72061     | C9orf3   | NM_001289926_13_+_1 |
| Egr3         | 0.790  | 0.456  | 3.355  | 3.128  | 4.669  | 5.883  | 2.672  | 1.884  | -3.312 | -2.105 | 13655     | EGR3     | NM_001289927_14_+_1 |
| Ache         | -3.458 | -3.422 | -3.937 | -1.846 | -4.105 | -3.078 | -2.431 | -1.965 | -3.211 | -2.671 | 11423     | ACHE     | NM_001290010_5_+_1  |
| Pemt         | 1.142  | 0.865  | 1.545  | 2.604  | -0.855 | -2.082 | -1.337 | -1.190 | -0.912 | -0.585 | 18618     | PEMT     | NM_001290011_11_-_1 |
| Pemt         | -0.235 | -1.750 | -1.540 | 1.536  | -2.622 | -2.274 | -1.959 | -2.678 | -4.970 | -3.225 | 18618     | PEMT     | NM_001290012_11_-_1 |
| Pemt         | -4.514 | -3.927 | 0.625  | 1.855  | -4.972 | -2.990 | -2.506 | -1.185 | -4.906 | -4.921 | 18618     | PEMT     | NM_001290013_11_-_1 |
| Pemt         | -4.981 | -4.981 | -4.943 | -4.943 | -4.975 | -4.975 | -4.964 | -4.946 | -4.981 | -4.977 | 18618     | PEMT     | NM_001290014_11_-_1 |
| Rbm4         | 2.358  | 2.120  | 3.033  | 3.312  | 2.870  | 3.014  | 2.573  | 2.743  | 2.863  | 3.413  | 19653     | RBM4     | NM_001290122_19_-_1 |
| Rbm4         | -0.326 | -0.967 | -0.046 | 0.268  | -0.392 | -1.312 | -1.310 | -0.588 | -1.465 | -0.662 | 19653     | RBM4     | NM_001290123_19_-_1 |
| Rbm4         | 2.459  | 2.692  | 2.229  | 1.774  | 1.795  | 1.351  | 1.736  | 1.164  | 1.276  | 1.612  | 19653     | RBM4     | NM_001290124_19_-_1 |
| Rbm4         | 3.026  | 2.673  | 2.341  | 2.123  | 2.302  | 1.669  | 1.795  | 1.367  | 1.449  | 0.753  | 19653     | RBM4     | NM_001290125_19_-_1 |
| Gm21992      | 2.789  | 2.336  | 1.328  | 0.557  | 1.601  | 1.038  | 0.950  | 1.326  | -0.352 | 0.286  | 102902673 | NA       | NM_001290127_19_-_1 |
| Gm21992      | -4.819 | -4.981 | -4.978 | -4.978 | -4.974 | -4.981 | -4.936 | -4.975 | -4.956 | -4.971 | 102902673 | NA       | NM_001290128_19_-_1 |
| Ccdc169      | -4.981 | -4.981 | -4.932 | -4.932 | -4.981 | -4.981 | -4.981 | -4.981 | -3.738 | -4.981 | 320604    | CCDC169  | NM_001290138_3_+_1  |
| Ccdc169      | -4.792 | -4.981 | -4.938 | -4.973 | -4.961 | -4.971 | -4.981 | -4.981 | -4.981 | -4.981 | 320604    | CCDC169  | NM_001290141_3_+_1  |
| Snx29        | -4.981 | -4.981 | -3.609 | -4.827 | -4.966 | -4.888 | -4.964 | -4.951 | -4.981 | -4.981 | 74478     | SNX29    | NM_001290148_16_+_1 |
| Nudt7        | -0.655 | -0.072 | -4.360 | -2.207 | -2.893 | -0.818 | -1.574 | -2.817 | -0.667 | -0.845 | 67528     | NUDT7    | NM_001290180_8_+_1  |
| Nudt7        | 0.483  | 0.555  | 0.827  | 1.002  | 0.939  | 0.445  | 0.082  | 0.696  | 2.198  | 2.292  | 67528     | NUDT7    | NM_001290181_8_+_1  |
| Nudt7        | 0.799  | 0.663  | -0.764 | -0.808 | -0.278 | -0.460 | -0.191 | -1.527 | -0.051 | 0.021  | 67528     | NUDT7    | NM_001290182_8_+_1  |
| Ddit3        | 0.193  | 1.340  | -1.153 | 0.345  | 0.392  | -0.438 | 0.167  | 1.053  | 0.438  | 1.119  | 13198     | DDIT3    | NM_001290183_10_+_1 |
| Marc1        | -4.981 | -4.981 | -2.830 | -4.831 | -0.750 | -0.759 | -2.180 | -4.552 | -4.190 | -2.082 | 66112     | MARC1    | NM_001290273_1_-_1  |
| Amot         | -4.981 | -4.981 | -3.747 | -4.600 | -3.819 | -3.739 | -4.959 | -4.716 | -3.235 | -4.981 | 27494     | AMOT     | NM_001290274_X_-_1  |
| Rcor3        | 4.173  | 4.614  | 1.668  | 1.513  | 1.615  | 1.861  | 1.998  | 1.091  | 2.529  | 1.845  | 214742    | NA       | NM_001290278_1_-_1  |
| Rcor3        | 0.065  | 0.369  | 0.020  | -0.812 | -1.776 | -0.844 | -1.391 | -1.995 | -0.808 | -4.880 | 214742    | NA       | NM_001290279_1_-_1  |
| Rcor3        | -0.057 | 1.204  | 0.242  | 0.838  | -0.629 | 0.292  | 0.468  | 0.758  | 1.024  | 1.295  | 214742    | NA       | NM_001290280_1_-_1  |
| Rcor3        | 2.485  | 2.134  | 0.206  | 1.104  | 0.806  | 1.352  | 1.090  | 0.509  | 1.381  | 1.044  | 214742    | NA       | NM_001290282_1_-_1  |
| Pld6         | -4.946 | -4.839 | -4.920 | -2.137 | -4.903 | -3.810 | -4.887 | -4.406 | -4.981 | -4.967 | 194908    | NA       | NM_001290283_11_-_1 |
| Samd15       | 0.709  | 0.870  | -0.560 | -2.281 | -1.762 | -2.167 | -1.767 | -3.142 | -4.981 | -2.094 | 238333    | SAMD15   | NM_001290288_12_+_1 |
| Shisa7       | -0.274 | -0.712 | -4.445 | -4.856 | -4.981 | -4.981 | -4.951 | -4.966 | -4.981 | -4.981 | 23813     | SHISA7   | NM_001290291_7_-_1  |
| Plppr2       | -4.307 | -2.895 | -2.649 | -2.692 | -1.694 | -1.766 | -2.020 | -4.344 | -2.089 | -0.979 | 235044    | PLPPR2   | NM_001290299_9_+_1  |
| Nrde2        | 2.998  | 2.937  | 3.124  | 3.221  | 3.554  | 3.281  | 3.429  | 3.111  | 3.962  | 3.551  | 217827    | NRDE2    | NM_001290303_12_-_1 |
| Wnk2         | -4.981 | -4.981 | -4.981 | -4.981 | -4.981 | -4.981 | -4.981 | -4.981 | -4.113 | -2.391 | 75607     | WNK2     | NM_001290311_13_-_1 |
| Wnk2         | -4.981 | -4.981 | -4.981 | -4.981 | -4.879 | -4.975 | -4.980 | -4.950 | -4.263 | -3.791 | 75607     | WNK2     | NM_001290313_13_-_1 |
| Vsig10l      | 0.317  | 0.512  | -0.521 | -1.286 | 1.348  | 0.374  | 0.627  | 0.465  | 1.802  | 1.714  | 75690     | VSIG10L  | NM_001290316_7_+_1  |
| Slc26a8      | -4.981 | -4.981 | -4.953 | -4.358 | -3.598 | -4.902 | -3.704 | -4.625 | -2.569 | -4.981 | 224661    | SLC26A8  | NM_001290320_17_-_1 |
| Cacna1c      | -4.981 | -4.981 | -4.897 | -4.565 | -4.971 | -4.415 | -4.974 | -4.976 | -4.981 | -4.981 | 12288     | CACNA1C  | NM_001290335_6_-_1  |
| Prickle4     | -4.981 | -4.981 | -3.376 | -3.796 | -4.005 | -4.154 | -1.572 | -4.385 | -3.738 | -3.098 | 381104    | PRICKLE4 | NM_001290337_17_-_1 |
| Zfand4       | -0.846 | -1.026 | -2.801 | -2.214 | -0.807 | -0.389 | -0.128 | -3.413 | 0.923  | 0.021  | 67492     | ZFAND4   | NM_001290338_6_+_1  |
| Zfand4       | -0.345 | 1.288  | 0.208  | -0.201 | -0.047 | 0.204  | -0.316 | -0.559 | 0.044  | 0.866  | 67492     | ZFAND4   | NM_001290339_6_+_1  |

|           |        |        |        |        |        |        |        |        |        |        |        |           |                    |
|-----------|--------|--------|--------|--------|--------|--------|--------|--------|--------|--------|--------|-----------|--------------------|
| Map4k3    | 3.123  | 3.466  | 1.862  | 1.981  | 3.121  | 3.281  | 3.567  | 3.460  | 3.570  | 3.980  | 225028 | MAP4K3    | NM_001290345_17_-1 |
| Plcb3     | 2.372  | 3.053  | 2.824  | 3.085  | 1.841  | 1.780  | 3.077  | 3.441  | 4.987  | 5.202  | 18797  | PLCB3     | NM_001290349_19_-1 |
| Zfp37     | -4.981 | -4.367 | -4.634 | -4.025 | -4.844 | -4.943 | -4.922 | -4.898 | -4.981 | -4.981 | 22696  | ZFP37     | NM_001290350_4_-1  |
| Zfp37     | -4.981 | -4.313 | -4.630 | -4.827 | -4.766 | -4.913 | -4.855 | -3.866 | -4.981 | -4.981 | 22696  | ZFP37     | NM_001290351_4_-1  |
| Zfp37     | -4.981 | -3.547 | -3.145 | -4.035 | -2.568 | -3.713 | -4.844 | -3.691 | -4.981 | -4.981 | 22696  | ZFP37     | NM_001290353_4_-1  |
| Aifm1     | -4.729 | -1.635 | -2.908 | -2.621 | -2.768 | -2.719 | -3.524 | -2.972 | -1.327 | -2.535 | 26926  | AIFM1     | NM_001290364_X_-1  |
| Asph      | 2.858  | 3.362  | -0.517 | -1.148 | -0.834 | -2.901 | -2.399 | -1.940 | -0.648 | 2.211  | 65973  | ASPH      | NM_001290367_4_-1  |
| Nmt2      | -1.160 | -0.426 | 0.108  | -1.041 | -0.290 | -0.507 | 0.369  | -0.307 | 0.164  | 0.146  | 18108  | NMT2      | NM_001290368_2_+1  |
| Nmt2      | 2.470  | 2.992  | 0.713  | 2.084  | -0.058 | 0.936  | 0.280  | -0.636 | 1.243  | 1.421  | 18108  | NMT2      | NM_001290369_2_+1  |
| Nmt2      | 1.589  | -0.169 | 2.290  | 1.224  | 1.618  | 0.521  | 0.565  | 2.718  | 0.822  | 0.944  | 18108  | NMT2      | NM_001290370_2_+1  |
| Amelx     | -2.470 | -2.153 | -4.817 | -4.875 | -4.948 | -4.871 | -4.918 | -4.948 | -4.981 | -4.981 | 11704  | AMELY     | NM_001290371_X_-1  |
| Rgs20     | -4.981 | -4.981 | -4.498 | -4.972 | -4.584 | -4.553 | -4.981 | -4.981 | -4.485 | -4.459 | 58175  | RGS20     | NM_001290372_1_-1  |
| Camk1d    | -4.391 | -1.488 | 0.345  | -1.971 | -2.433 | -4.867 | -0.634 | -4.865 | -0.274 | 0.437  | 227541 | CAMK1D    | NM_001290374_2_-1  |
| Camk1d    | 3.279  | 2.928  | 4.115  | 2.988  | 2.422  | 2.259  | 3.547  | 3.514  | 3.660  | 2.858  | 227541 | CAMK1D    | NM_001290375_2_-1  |
| Camk1d    | 1.695  | 0.136  | 1.870  | 0.417  | -1.390 | -2.904 | 1.990  | 0.730  | 5.171  | 5.445  | 227541 | CAMK1D    | NM_001290376_2_-1  |
| Oscar     | -4.981 | -4.981 | -4.975 | -4.975 | -4.927 | -3.798 | -4.924 | -4.504 | -4.981 | -2.773 | 232790 | OSCAR     | NM_001290377_7_-1  |
| Ap1s2     | 4.664  | 5.094  | 5.390  | 5.515  | 6.659  | 6.892  | 7.104  | 7.166  | 8.033  | 8.456  | 108012 | AP1S2     | NM_001290378_X_+1  |
| Ap1s2     | -1.545 | -4.367 | -0.909 | -3.437 | -3.461 | -1.116 | -1.945 | -4.940 | -2.444 | -0.323 | 108012 | AP1S2     | NM_001290379_X_+1  |
| Hist1h2bc | 0.063  | -0.401 | -0.263 | -0.202 | 0.888  | 0.239  | -0.806 | -1.154 | -0.413 | -1.722 | 68024  | HIST1H2BI | NM_001290380_13_+1 |
| Tfpt      | 3.476  | 3.524  | 2.856  | 3.175  | 3.266  | 3.076  | 3.140  | 3.041  | 3.219  | 3.061  | 69714  | TFPT      | NM_001290381_7_-1  |
| Esrp1     | -1.976 | -4.981 | -4.945 | -4.777 | -4.981 | -4.981 | -4.981 | -4.981 | -4.981 | -4.981 | 207920 | ESRP1     | NM_001290383_4_-1  |
| Arhgef9   | -1.571 | -1.418 | 2.184  | 2.219  | -0.915 | -0.068 | -1.418 | -0.513 | -4.981 | -4.648 | 236915 | ARHGEF9   | NM_001290384_X_-1  |
| Arhgef9   | -4.699 | -0.915 | -3.474 | -4.236 | -1.314 | 0.323  | -4.623 | -2.182 | -3.925 | -2.057 | 236915 | ARHGEF9   | NM_001290385_X_-1  |
| Pdp1      | 0.435  | 0.715  | -0.472 | -1.687 | -0.778 | -2.560 | -0.913 | -0.794 | 1.471  | -0.659 | 381511 | PDP1      | NM_001290387_4_-1  |
| Atp1b4    | -4.981 | -4.981 | -4.396 | -4.417 | -4.953 | -4.346 | -4.557 | -3.985 | -2.627 | -2.427 | 67821  | ATP1B4    | NM_001290389_X_+1  |
| Pdp1      | -1.578 | -1.170 | -2.365 | -0.979 | -2.988 | -4.253 | -2.640 | -3.045 | -3.763 | -2.677 | 381511 | PDP1      | NM_001290391_4_-1  |
| Awat2     | -4.981 | -4.981 | -4.981 | -4.981 | -4.095 | -4.726 | -4.886 | -4.826 | -4.981 | -4.981 | 245532 | AWAT2     | NM_001290395_X_-1  |
| Mybl1     | -4.981 | -1.843 | -2.308 | -1.243 | -2.058 | -1.704 | -4.726 | -3.674 | -4.321 | -4.460 | 17864  | MYBL1     | NM_001290397_1_-1  |
| Cstf2     | 2.518  | 3.029  | 2.021  | 2.465  | 2.223  | 2.026  | 1.379  | 1.879  | 2.441  | 2.393  | 108062 | CSTF2     | NM_001290398_X_+1  |
| Cstf2     | 3.076  | 2.966  | 1.942  | 2.096  | 2.259  | 2.257  | 1.227  | 1.706  | 2.054  | 1.369  | 108062 | CSTF2     | NM_001290399_X_+1  |
| Dlg3      | -4.981 | -4.981 | -4.981 | -4.981 | -4.971 | -4.971 | -4.955 | -4.976 | -1.727 | -2.802 | 53310  | DLG3      | NM_001290402_X_+1  |
| Sapcd2    | -4.981 | -4.574 | -1.358 | -4.624 | -0.673 | -3.355 | -1.145 | -1.616 | -1.890 | -2.517 | 72080  | SAPCD2    | NM_001290407_2_+1  |
| Rdh13     | 2.298  | 1.262  | 0.221  | 0.018  | 0.088  | 0.301  | 1.078  | 1.870  | 0.284  | -1.546 | 108841 | RDH13     | NM_001290409_7_-1  |
| Rdh13     | -3.834 | -0.823 | -2.421 | -1.957 | -3.914 | -3.241 | -2.908 | -1.916 | -3.911 | -1.691 | 108841 | RDH13     | NM_001290411_7_-1  |
| Traf2     | 2.715  | 1.429  | 2.479  | 2.650  | 3.784  | 3.497  | 2.835  | 2.893  | 2.356  | 1.767  | 22030  | TRAF2     | NM_001290413_2_-1  |
| Fgf13     | -4.981 | -4.981 | -2.280 | -2.483 | -3.498 | -4.315 | -4.806 | -4.138 | -4.981 | -2.787 | 14168  | FGF13     | NM_001290414_X_-1  |
| Fgf13     | -4.981 | -1.460 | -2.018 | -2.684 | -3.703 | -3.316 | -4.124 | -3.270 | -4.981 | -2.705 | 14168  | FGF13     | NM_001290415_X_-1  |
| Eps8l1    | -3.092 | -4.981 | -3.569 | -4.945 | -1.967 | -4.824 | -3.565 | -4.888 | -3.823 | -4.758 | 67425  | EPS8L1    | NM_001290416_7_+1  |
| Snacp4    | -3.912 | -3.432 | -2.441 | 0.379  | -0.471 | -2.602 | -0.348 | -1.895 | 0.727  | 0.891  | 227644 | SNAPC4    | NM_001290419_2_-1  |
| Ccnc      | -4.957 | -0.565 | -3.368 | -0.336 | -4.475 | -1.409 | -1.202 | -2.517 | -0.854 | -1.797 | 51813  | CCNC      | NM_001290420_4_+1  |
| Flna      | 2.138  | 1.199  | 4.802  | 4.873  | 4.633  | 4.815  | 5.821  | 6.277  | 7.028  | 7.462  | 192176 | FLNA      | NM_001290421_X_-1  |
| Ccnc      | 1.947  | 2.008  | -0.315 | -0.818 | 1.307  | 0.636  | 1.258  | 0.891  | 1.922  | 1.635  | 51813  | CCNC      | NM_001290422_4_+1  |
| Il11      | -4.981 | -4.981 | -3.937 | -3.819 | -3.930 | -4.774 | -2.898 | -3.472 | -2.832 | -3.746 | 16156  | IL11      | NM_001290423_7_-1  |
| Fmr1      | 4.303  | 4.909  | 4.239  | 3.882  | 4.062  | 4.104  | 4.222  | 3.593  | 3.996  | 4.156  | 14265  | FMR1      | NM_001290424_X_+1  |
| Usp45     | 2.922  | 2.533  | 2.592  | 2.877  | 2.356  | 2.832  | 1.969  | 1.947  | 3.658  | 3.770  | 77593  | USP45     | NM_001290425_4_+1  |
| Zfp865    | 4.774  | 4.286  | 2.453  | 1.646  | 2.691  | 2.221  | 2.287  | 1.838  | 1.608  | 0.940  | 319748 | ZNF865    | NM_001290426_7_+1  |
| Ccdc106   | -0.985 | -0.552 | -1.791 | -1.126 | -1.680 | 0.950  | -1.039 | 0.482  | -0.994 | 1.700  | 232821 | CCDC106   | NM_001290429_7_+1  |
| Ftsj1     | 4.505  | 4.128  | 3.506  | 3.876  | 3.416  | 3.494  | 3.329  | 3.606  | 3.117  | 3.538  | 54632  | FTSJ1     | NM_001290430_X_-1  |
| Ccdc106   | -3.960 | -3.751 | -4.334 | -4.606 | -4.662 | -4.862 | -4.298 | -4.763 | -4.221 | -4.320 | 232821 | CCDC106   | NM_001290432_7_+1  |
| Epha7     | -4.981 | -4.981 | -4.766 | -4.934 | -4.499 | -4.845 | -3.791 | -4.693 | -4.967 | -2.175 | 13841  | EPHA7     | NM_001290434_4_+1  |
| Zscan22   | -4.077 | -1.022 | -0.080 | -1.952 | -0.104 | -2.154 | -2.053 | -0.622 | -0.464 | -4.257 | 232878 | ZSCAN22   | NM_001290436_7_+1  |
| Inpp5e    | 1.399  | 0.621  | 0.984  | 0.515  | 1.967  | 0.430  | -0.898 | 1.345  | 0.480  | 1.057  | 64436  | INPP5E    | NM_001290437_2_-1  |
| Zscan22   | -2.147 | 0.426  | -0.363 | -0.550 | -1.348 | -0.681 | 0.116  | -1.013 | 0.635  | 1.276  | 232878 | ZSCAN22   | NM_001290438_7_+1  |
| Zscan22   | 1.519  | -0.392 | 0.785  | 1.300  | 1.132  | 1.973  | 0.019  | 0.709  | 1.312  | 1.180  | 232878 | ZSCAN22   | NM_001290440_7_+1  |
| Zscan22   | 0.317  | -2.908 | 1.376  | -4.169 | 1.128  | -1.085 | -0.204 | -1.395 | 1.267  | -3.628 | 232878 | ZSCAN22   | NM_001290441_7_+1  |
| Zscan22   | 2.219  | 2.267  | 1.272  | 2.098  | 1.164  | -0.350 | 1.643  | 1.292  | 1.151  | 2.253  | 232878 | ZSCAN22   | NM_001290442_7_+1  |
| Spaca1    | -1.987 | -4.981 | -4.905 | -4.957 | -2.975 | -4.975 | -3.639 | -4.968 | -3.485 | -4.962 | 67652  | SPACA1    | NM_001290443_4_-1  |
| Adgrg2    | -3.960 | -4.981 | -4.732 | -4.658 | -4.965 | -4.976 | -4.905 | -4.872 | -4.685 | -4.981 | 237175 | ADGRG2    | NM_001290445_X_+1  |
| Adgrg2    | -4.184 | -4.981 | -4.830 | -4.770 | -4.974 | -4.978 | -4.942 | -4.951 | -4.767 | -4.981 | 237175 | ADGRG2    | NM_001290446_X_+1  |
| Nfx1      | 5.436  | 5.132  | 4.895  | 4.659  | 5.010  | 5.217  | 5.372  | 5.043  | 5.000  | 4.497  | 74164  | NFX1      | NM_001290448_4_+1  |
| Nfx1      | 1.618  | 2.044  | 2.979  | 3.131  | 3.028  | 2.178  | 1.842  | 2.662  | 2.881  | 3.262  | 74164  | NFX1      | NM_001290449_4_+1  |
| Gria3     | -0.125 | -4.408 | -1.257 | -0.696 | 0.045  | -1.582 | -0.585 | -1.349 | -0.744 | -1.412 | 53623  | GRIA3     | NM_001290451_X_+1  |
| Mzf1      | -0.523 | -0.551 | -3.064 | -1.985 | -2.622 | -3.180 | -3.696 | -2.188 | -4.770 | -1.911 | 109889 | MZF1      | NM_001290452_7_-1  |
| Mzf1      | -4.630 | -4.454 | -4.862 | -4.927 | -3.269 | -4.940 | -4.697 | -4.969 | -4.544 | -4.661 | 109889 | MZF1      | NM_001290453_7_-1  |
| Ubap1     | 2.115  | 1.598  | 1.498  | 1.345  | 1.195  | 1.834  | 1.391  | 1.564  | 3.077  | 2.277  | 67123  | UBAP1     | NM_001290454_4_+1  |
| Gripap1   | 0.018  | 0.315  | -0.345 | 1.667  | 0.246  | 1.194  | 0.882  | 1.201  | 1.835  | 2.569  | 54645  | GRIPAP1   | NM_001290455_X_+1  |
| Relb      | 4.780  | 4.146  | 6.889  | 6.764  | 8.809  | 8.559  | 7.959  | 6.960  | 5.306  | 5.739  | 19698  | RELB      | NM_001290457_7_-1  |
| Zfp428    | -4.373 | -4.383 | -3.131 | -4.052 | -3.777 | -4.786 | -3.001 | -3.552 | -4.680 | -2.551 | 232969 | ZNF428    | NM_001290461_7_+1  |
| Spag8     | -2.362 | -4.981 | -3.039 | -3.474 | -3.225 | -4.611 | -4.748 | -4.883 | -4.394 | -4.981 | 433700 | SPAG8     | NM_001290462_4_-1  |
| Adamts13  | -2.827 | -4.981 | -5.008 | -2.638 | -4.928 | -0.833 | -4.823 | -2.381 | -4.981 | -4.383 | 279028 | ADAMTS13  | NM_001290463_2_+1  |
| Adamts13  | -0.481 | -1.116 | 0.827  | -0.984 | 1.446  | -1.748 | -0.641 | -1.938 | -0.548 | -1.354 | 279028 | ADAMTS13  | NM_001290464_2_+1  |
| Adamts13  | 1.503  | 0.569  | 0.899  | 0.166  | 0.949  | 0.988  | 1.514  | 0.606  | 1.467  | 0.743  | 279028 | ADAMTS13  | NM_001290465_2_+1  |
| Hist1h2bp | -1.111 | -1.587 | -2.553 | -1.060 | -0.660 | -1.244 | -1.706 | -0.973 | -1.082 | -0.976 | 319188 | HIST1H2BO | NM_001290466_13_+1 |
| Hs6st2    | -4.981 | -4.981 | -4.925 | -4.924 | -4.827 | -4.004 | -4.977 | -4.973 | -4.981 | -3.274 | 50786  | HS6ST2    | NM_001290467_X_-1  |

|           |        |        |        |        |        |        |        |        |        |        |        |           |                     |
|-----------|--------|--------|--------|--------|--------|--------|--------|--------|--------|--------|--------|-----------|---------------------|
| Hs6st2    | -4.981 | -4.981 | -4.747 | -4.728 | -4.685 | -4.905 | -4.974 | -4.963 | -4.981 | -4.981 | 50786  | HS6ST2    | NM_001290468_X_-_1  |
| Atp1a3    | 5.811  | 5.365  | 3.147  | 2.550  | 4.148  | 3.387  | 6.299  | 6.342  | 8.927  | 8.573  | 232975 | ATP1A3    | NM_001290469_7_-_1  |
| CltA      | 2.425  | 2.331  | 2.378  | 2.035  | 1.152  | 1.484  | 1.744  | 0.458  | 0.918  | 0.757  | 12757  | CLTA      | NM_001290470_4_+_1  |
| Rnf185    | 4.506  | 4.515  | 3.626  | 3.662  | 3.601  | 3.293  | 3.427  | 3.774  | 4.021  | 4.504  | 193670 | RNF185    | NM_001290472_11_-_1 |
| Rnf185    | 1.516  | 2.312  | 1.652  | 1.796  | 0.954  | -0.312 | 1.861  | 1.432  | 2.203  | 1.412  | 193670 | RNF185    | NM_001290473_11_-_1 |
| Tdrd7     | 0.784  | -0.791 | -0.929 | -0.451 | -0.287 | -0.746 | -0.193 | -0.568 | 0.194  | 0.482  | 100121 | TDRD7     | NM_001290475_4_+_1  |
| Klhl13    | -4.981 | -4.283 | -4.981 | -4.981 | -4.973 | -4.973 | -4.981 | -4.977 | -4.981 | -4.981 | 67455  | KLHL13    | NM_001290476_X_-_1  |
| Klhl4     | -3.729 | -3.158 | -4.128 | -4.954 | -4.858 | -4.926 | -4.971 | -3.030 | -4.981 | -4.981 | 237010 | KLHL4     | NM_001290477_X_+_1  |
| Klhl4     | -0.382 | -0.405 | -4.974 | -4.974 | -4.234 | -4.158 | -4.975 | -3.855 | -4.981 | -4.981 | 237010 | KLHL4     | NM_001290478_X_+_1  |
| Rxra      | 0.382  | 1.356  | 2.381  | 2.424  | 0.742  | 0.111  | 2.178  | 2.750  | 4.412  | 5.543  | 20181  | RXRA      | NM_001290481_2_+_1  |
| Rxra      | -1.392 | -0.421 | 0.370  | 0.247  | -1.304 | -2.297 | 0.707  | 0.516  | 2.476  | 3.408  | 20181  | RXRA      | NM_001290482_2_+_1  |
| Gtf3c5    | -0.503 | -0.694 | -1.124 | -4.439 | -0.235 | -2.264 | -1.463 | -0.722 | 0.284  | -0.997 | 70239  | GTF3C5    | NM_001290484_2_-_1  |
| Lamp2     | -0.154 | -0.725 | -0.647 | 0.285  | -0.859 | -2.166 | -1.932 | -1.939 | -0.503 | 0.218  | 16784  | LAMP2     | NM_001290485_X_-_1  |
| Lpar1     | -4.981 | -1.881 | -3.614 | -2.066 | -3.124 | -3.305 | -1.411 | -2.203 | -4.642 | -1.702 | 14745  | LPAR1     | NM_001290486_4_-_1  |
| Atp5sl    | 5.115  | 5.623  | 3.402  | 4.211  | 4.097  | 4.875  | 3.863  | 4.490  | 4.058  | 4.502  | 66349  | ATP5SL    | NM_001290487_7_+_1  |
| Med27     | -1.394 | -1.174 | -3.085 | -2.760 | -3.515 | -3.514 | -2.392 | -2.871 | -2.353 | -4.921 | 68975  | MED27     | NM_001290489_2_+_1  |
| Rhbdd3    | 0.263  | 0.858  | -0.662 | -1.111 | -2.083 | -1.536 | -1.624 | -0.438 | -0.904 | -1.407 | 279766 | RHBDD3    | NM_001290491_11_+_1 |
| Rhbdd3    | 0.138  | -1.109 | -0.126 | -1.172 | -3.830 | -1.513 | -1.807 | -1.889 | -0.130 | -0.990 | 279766 | RHBDD3    | NM_001290492_11_+_1 |
| Rhbdd3    | 0.647  | 0.920  | 0.498  | 0.054  | -0.906 | 0.303  | 0.545  | 0.257  | -0.280 | 0.481  | 279766 | RHBDD3    | NM_001290493_11_+_1 |
| Trub2     | 2.125  | 2.202  | 1.492  | 1.283  | 2.017  | 0.995  | 1.194  | 0.942  | 2.653  | 2.084  | 227682 | TRUB2     | NM_001290495_2_-_1  |
| Trub2     | 0.350  | 0.100  | -2.361 | -2.153 | -0.317 | -0.042 | -0.346 | -4.680 | 0.642  | 0.460  | 227682 | TRUB2     | NM_001290496_2_-_1  |
| Tmem91    | -4.981 | -1.049 | -1.753 | -4.799 | -0.898 | 0.750  | -2.514 | -1.714 | -2.340 | -3.295 | 320208 | TMEM91    | NM_001290497_7_-_1  |
| Tmem91    | -4.981 | -2.963 | -2.515 | -4.213 | -2.036 | -3.173 | -2.032 | -2.709 | -3.831 | -3.108 | 320208 | TMEM91    | NM_001290498_7_-_1  |
| Ttc14     | 3.451  | 3.665  | 2.526  | 1.448  | 3.046  | 2.939  | 2.222  | 1.323  | 2.615  | 2.469  | 67120  | TTC14     | NM_001290500_3_+_1  |
| Znrf3     | 1.966  | 1.426  | -0.890 | -2.214 | -0.823 | -0.709 | -2.682 | -0.872 | -1.598 | -1.050 | 407821 | ZNRF3     | NM_001290501_11_-_1 |
| Ttc14     | 5.661  | 5.855  | 5.165  | 5.210  | 5.618  | 5.879  | 5.503  | 5.418  | 4.837  | 5.195  | 67120  | TTC14     | NM_001290502_3_+_1  |
| Zer1      | 3.642  | 3.523  | 3.709  | 3.348  | 3.759  | 3.846  | 3.779  | 3.907  | 4.727  | 4.639  | 227693 | ZER1      | NM_001290503_2_-_1  |
| Mid1      | -1.512 | -3.419 | -4.128 | -2.364 | -4.552 | -4.710 | -1.355 | -1.917 | -1.091 | -4.411 | 17318  | MID1      | NM_001290504_X_+_1  |
| Mid1      | 0.788  | 1.002  | 0.074  | -2.537 | 1.993  | 2.366  | 1.298  | 0.275  | -3.711 | 0.214  | 17318  | MID1      | NM_001290505_X_+_1  |
| Mid1      | -1.012 | -4.667 | -0.356 | -1.995 | -0.139 | -1.697 | 0.013  | 0.135  | -1.542 | -1.443 | 17318  | MID1      | NM_001290506_X_+_1  |
| Dolpp1    | -1.032 | -0.556 | -0.537 | -1.687 | -0.976 | -1.275 | -0.321 | -2.198 | -1.348 | 0.055  | 57170  | DOLPP1    | NM_001290508_2_+_1  |
| Dolpp1    | -1.444 | 0.441  | -4.746 | -4.920 | -4.843 | -2.282 | -3.019 | -4.923 | 0.211  | -1.349 | 57170  | DOLPP1    | NM_001290509_2_+_1  |
| BC024978  | -3.014 | -0.809 | -3.770 | -1.041 | -1.759 | -1.675 | -1.597 | -3.655 | -1.720 | -4.981 | 414069 | C19orf54  | NM_001290511_7_+_1  |
| Mid1      | 0.163  | -4.890 | -4.712 | -4.361 | -4.797 | -4.833 | -0.322 | -2.920 | -2.313 | -4.934 | 17318  | MID1      | NM_001290512_X_+_1  |
| BC024978  | -0.533 | 0.063  | -0.151 | -0.156 | -0.881 | -0.938 | -1.527 | -0.355 | -0.623 | -0.121 | 414069 | C19orf54  | NM_001290513_7_+_1  |
| Mospd1    | 5.872  | 6.125  | 6.305  | 6.052  | 3.418  | 3.909  | 3.993  | 4.402  | 4.513  | 4.456  | 70380  | MOSPD1    | NM_001290514_X_-_1  |
| Slc31a2   | -3.613 | -1.715 | -3.788 | -4.197 | -3.252 | -4.571 | -4.253 | -4.706 | -3.929 | -3.570 | 20530  | SLC31A2   | NM_001290518_4_+_1  |
| Wdr31     | -4.125 | -3.991 | -4.851 | -4.792 | -4.824 | -4.930 | -4.977 | -4.981 | -4.981 | -4.981 | 71354  | WDR31     | NM_001290521_4_-_1  |
| Wdr31     | -2.041 | -1.364 | -4.233 | -3.634 | -3.686 | -4.497 | -4.951 | -4.966 | -4.981 | -4.981 | 71354  | WDR31     | NM_001290522_4_-_1  |
| Mospd2    | 2.237  | 2.651  | 4.207  | 4.337  | 1.384  | 1.709  | 2.036  | 2.352  | 3.433  | 4.339  | 76763  | MOSPD2    | NM_001290523_X_-_1  |
| Mospd2    | 2.018  | 0.416  | 4.219  | 4.099  | 2.620  | 2.580  | 3.142  | 3.593  | 3.939  | 4.518  | 76763  | MOSPD2    | NM_001290524_X_-_1  |
| BlvrB     | 2.681  | 2.068  | -0.289 | 0.466  | 0.134  | 0.901  | -0.331 | 0.773  | -2.054 | -1.297 | 233016 | BLVRB     | NM_001290525_7_+_1  |
| Nhs       | -4.385 | -4.981 | -4.981 | -4.981 | -4.905 | -3.454 | -4.977 | -4.761 | -4.981 | -4.545 | 195727 | NHS       | NM_001290526_X_-_1  |
| Psip1     | 4.499  | 4.193  | 4.808  | 4.866  | 5.388  | 5.530  | 4.721  | 4.552  | 2.904  | 3.129  | 101739 | PSIP1     | NM_001290527_4_-_1  |
| Map3k10   | 1.976  | 1.712  | 1.935  | 1.959  | 1.705  | 1.696  | 1.641  | 1.713  | 2.829  | 2.939  | 269881 | MAP3K10   | NM_001290528_7_-_1  |
| Hist1h2be | -1.512 | -3.475 | -0.539 | -2.240 | -0.239 | -3.266 | -0.557 | -3.359 | -0.244 | -2.877 | 319179 | HIST1H2BF | NM_001290530_13_-_1 |
| Nxt2      | -3.647 | -0.250 | 2.182  | 3.450  | -1.227 | 1.897  | 2.273  | 2.183  | 2.956  | 4.351  | 237082 | NXT2      | NM_001290532_X_+_1  |
| Nxt2      | -4.107 | -3.922 | -1.060 | -1.017 | -3.151 | -2.917 | -3.245 | -3.401 | -1.967 | -1.866 | 237082 | NXT2      | NM_001290533_X_+_1  |
| Ogt       | 6.225  | 6.170  | 5.527  | 6.036  | 5.335  | 5.615  | 5.434  | 5.728  | 6.089  | 6.571  | 108155 | OGT       | NM_001290535_X_+_1  |
| Otud5     | 4.076  | 4.335  | 4.210  | 4.377  | 3.609  | 3.942  | 4.024  | 4.555  | 4.454  | 4.531  | 54644  | NA        | NM_001290536_X_+_1  |
| Otud5     | 5.514  | 5.516  | 4.890  | 5.141  | 5.088  | 5.238  | 5.001  | 4.970  | 4.189  | 4.276  | 54644  | NA        | NM_001290537_X_+_1  |
| Pdzd4     | 4.180  | 4.442  | -0.103 | -1.384 | -1.319 | -1.565 | -1.350 | -2.068 | -1.624 | -0.996 | 245469 | PDZD4     | NM_001290540_X_-_1  |
| Acer2     | -0.462 | -4.542 | -3.005 | -3.883 | -3.670 | -3.090 | -2.518 | -3.546 | -1.588 | -2.512 | 230379 | ACER2     | NM_001290541_4_+_1  |
| Plekkg2   | -4.574 | -3.769 | -2.047 | -2.270 | -0.593 | -1.953 | -2.651 | -2.633 | -0.711 | -0.433 | 101497 | PLEKHG2   | NM_001290542_7_-_1  |
| Acer2     | -4.981 | -4.981 | -4.968 | -4.638 | -3.987 | -4.326 | -3.655 | -4.213 | -2.343 | -2.481 | 230379 | ACER2     | NM_001290543_4_+_1  |
| Aftph     | 1.337  | 2.328  | 2.556  | 2.353  | 2.557  | 2.555  | 2.099  | 1.070  | 2.998  | 2.527  | 216549 | AFTPH     | NM_001290545_11_-_1 |
| Phf6      | -4.771 | -1.511 | -3.380 | -1.611 | -0.994 | -2.785 | -4.611 | -1.264 | -0.150 | -1.321 | 70998  | PHF6      | NM_001290546_X_+_1  |
| Fubp3     | 3.259  | 3.394  | 2.870  | 2.832  | 3.049  | 2.994  | 2.814  | 2.687  | 3.610  | 3.424  | 320267 | FUBP3     | NM_001290548_2_+_1  |
| Tek       | -4.981 | -4.337 | -4.972 | -4.972 | -4.896 | -4.947 | -4.969 | -4.900 | -4.981 | -4.981 | 21687  | TEK       | NM_001290549_4_+_1  |
| Gmfg      | -2.959 | -4.981 | -3.563 | -2.488 | -2.911 | -3.110 | -2.320 | -3.002 | -0.767 | -3.302 | 63986  | GMFG      | NM_001290550_7_+_1  |
| Tek       | -4.981 | -3.426 | -4.953 | -4.953 | -4.237 | -2.872 | -4.883 | -2.562 | -4.981 | -4.981 | 21687  | TEK       | NM_001290551_4_+_1  |
| Swi5      | 3.655  | 2.792  | 2.728  | 2.455  | 1.693  | 1.900  | 1.248  | 1.275  | -0.168 | -1.912 | 72931  | SWI5      | NM_001290552_2_-_1  |
| Pja1      | 3.084  | 3.090  | 1.386  | 2.557  | 1.808  | 2.184  | 1.988  | 2.420  | 3.015  | 2.682  | 18744  | PJA1      | NM_001290555_X_-_1  |
| Pja1      | 2.808  | 3.471  | 2.711  | 3.575  | 1.826  | 2.859  | 2.128  | 3.096  | 1.808  | 2.758  | 18744  | PJA1      | NM_001290556_X_-_1  |
| Slc25a25  | 0.957  | -3.967 | -0.557 | 0.227  | -2.887 | 0.238  | -0.650 | 0.016  | 1.281  | 1.430  | 227731 | SLC25A25  | NM_001290558_2_-_1  |
| Plp1      | -0.092 | -0.507 | -0.698 | -0.959 | -0.492 | -1.021 | -0.019 | -0.724 | -1.661 | -4.198 | 18823  | PLP1      | NM_001290561_X_+_1  |
| Plp1      | -2.989 | -3.159 | -3.791 | -3.723 | -3.458 | -3.315 | -3.653 | -4.184 | -3.685 | -4.981 | 18823  | PLP1      | NM_001290562_X_+_1  |
| Ttc16     | -1.945 | -1.292 | -4.080 | -4.968 | -4.574 | -4.840 | -3.740 | -4.631 | -4.245 | -2.554 | 338348 | TTC16     | NM_001290563_2_-_1  |
| Ttc16     | -4.827 | -4.591 | -4.976 | -4.976 | -4.965 | -4.980 | -4.605 | -4.971 | -4.981 | -4.927 | 338348 | TTC16     | NM_001290564_2_-_1  |
| Syne4     | -3.843 | -4.981 | -2.883 | -3.868 | -2.456 | -3.414 | -2.634 | -4.442 | -4.829 | -2.137 | 233066 | SYNE4     | NM_001290565_7_+_1  |
| Ttc16     | -1.261 | -1.275 | -4.955 | -4.955 | -4.579 | -4.955 | -4.971 | -4.976 | -4.981 | -1.992 | 338348 | TTC16     | NM_001290566_2_-_1  |
| Ttc16     | -3.940 | -3.283 | -4.985 | -4.985 | -4.793 | -4.969 | -4.977 | -4.979 | -4.981 | -4.170 | 338348 | TTC16     | NM_001290567_2_-_1  |
| Ift74     | -4.712 | -4.763 | -0.090 | -1.505 | -3.397 | -0.538 | -1.664 | -3.432 | -4.867 | -4.808 | 67694  | IFT74     | NM_001290568_4_+_1  |
| Lin37     | 3.534  | 3.332  | 2.489  | 1.926  | 2.252  | 1.931  | 1.607  | 2.052  | 2.088  | 1.023  | 75660  | LIN37     | NM_001290569_7_-_1  |

|          |        |        |        |        |        |        |        |        |        |        |        |          |                    |
|----------|--------|--------|--------|--------|--------|--------|--------|--------|--------|--------|--------|----------|--------------------|
| Ralgps1  | -4.244 | 0.874  | -0.565 | -1.731 | -1.247 | -2.602 | -3.965 | -4.540 | -4.308 | 0.391  | 241308 | RALGPS1  | NM_001290570_2_-1  |
| Ralgps1  | 3.616  | 3.661  | 0.995  | 0.801  | 1.861  | 2.077  | 1.593  | 1.684  | 1.682  | 1.721  | 241308 | RALGPS1  | NM_001290572_2_-1  |
| Kmt2b    | 2.729  | 2.375  | 3.554  | 3.555  | 5.087  | 5.159  | 4.400  | 3.861  | 3.748  | 3.637  | 75410  | KMT2B    | NM_001290573_7_-1  |
| Ppp1r3f  | -1.305 | -0.490 | -1.837 | -1.369 | -2.065 | 0.026  | -1.285 | -1.589 | -1.645 | -1.759 | 54646  | PPP1R3F  | NM_001290574_X_-1  |
| Pbx3     | -2.373 | -0.277 | 0.377  | -0.044 | 0.091  | -0.786 | 1.877  | 1.253  | 2.593  | 1.436  | 18516  | PBX3     | NM_001290576_2_-1  |
| Eqtn     | -3.668 | -4.981 | -3.487 | -3.345 | -3.428 | -4.804 | -3.602 | -4.906 | -4.981 | -4.981 | 67753  | EQTN     | NM_001290623_4_-1  |
| Prickle3 | 4.998  | 5.060  | 4.893  | 4.569  | 4.968  | 4.926  | 4.582  | 4.546  | 4.642  | 4.182  | 54630  | PRICKLE3 | NM_001290624_X_+1  |
| Mapkap1  | -0.344 | 0.119  | 0.585  | 1.396  | -1.469 | -0.931 | 0.404  | -1.158 | -1.119 | 1.589  | 227743 | MAPKAP1  | NM_001290625_2_+1  |
| Mapkap1  | -0.024 | 0.602  | 0.700  | 0.632  | -0.046 | -0.530 | 0.601  | -0.803 | 1.339  | 1.745  | 227743 | MAPKAP1  | NM_001290626_2_+1  |
| Atp4a    | 1.542  | 2.702  | -1.828 | 0.822  | 0.185  | 0.885  | -2.183 | -1.460 | -4.166 | -2.506 | 11944  | ATP4A    | NM_001290627_7_+1  |
| Vps54    | 4.648  | 4.405  | 3.520  | 3.276  | 3.465  | 3.034  | 3.587  | 3.425  | 5.072  | 4.613  | 245944 | VPS54    | NM_001290628_11_+1 |
| Rbm41    | 1.142  | 1.298  | -0.635 | -0.975 | 1.239  | 0.041  | 0.879  | 0.373  | -0.376 | 0.634  | 237073 | RBM41    | NM_001290630_X_-1  |
| Gapdhs   | -3.821 | -2.664 | -3.006 | -3.960 | -2.931 | -4.166 | -4.174 | -3.858 | -4.981 | -3.360 | 14447  | GAPDHS   | NM_001290631_7_-1  |
| Reps2    | -4.981 | -4.981 | -4.980 | -4.418 | -4.458 | -2.535 | -3.089 | -0.623 | -2.178 | 0.077  | 194590 | REPS2    | NM_001290633_X_-1  |
| Ugp2     | 5.563  | 5.699  | 5.585  | 5.624  | 5.664  | 5.719  | 5.930  | 6.163  | 6.706  | 7.271  | 216558 | UGP2     | NM_001290634_11_-1 |
| Cntrl    | -1.483 | -0.409 | -0.718 | -0.838 | -0.160 | -0.782 | -0.222 | -0.947 | -0.056 | -0.609 | 26920  | CNTRL    | NM_001290635_2_+1  |
| Dock7    | -1.220 | -1.175 | 1.729  | 0.953  | 1.604  | 1.295  | 0.610  | 0.389  | 2.314  | 2.239  | 67299  | DOCK7    | NM_001290636_4_-1  |
| Dab2ip   | -2.106 | -1.545 | -2.540 | -1.184 | 3.895  | 4.998  | 1.749  | 1.235  | -2.272 | -4.968 | 69601  | DAB2IP   | NM_001290637_2_+1  |
| Dab2ip   | -0.677 | -4.981 | -4.958 | -4.959 | -3.160 | -4.968 | -4.981 | -4.981 | -4.981 | -4.972 | 69601  | DAB2IP   | NM_001290639_2_+1  |
| Dab2ip   | -4.536 | -4.981 | -4.980 | -4.976 | -4.192 | -4.596 | -4.732 | -4.974 | -4.981 | -4.977 | 69601  | DAB2IP   | NM_001290640_2_+1  |
| Dab2ip   | -1.005 | -4.981 | -2.208 | -2.107 | 2.497  | 3.116  | 1.627  | 0.181  | -3.496 | -4.955 | 69601  | DAB2IP   | NM_001290641_2_+1  |
| Rc3h2    | 3.199  | 2.909  | 3.886  | 3.247  | 2.787  | 2.543  | 3.450  | 2.913  | 1.998  | 2.633  | 319817 | RC3H2    | NM_001290642_2_-1  |
| Rp2      | 5.011  | 4.713  | 4.234  | 4.425  | 4.188  | 4.349  | 3.192  | 4.247  | 4.245  | 4.054  | 19889  | RP2      | NM_001290643_X_+1  |
| Rp2      | 3.335  | 2.343  | 1.450  | 1.899  | 2.694  | 2.326  | 1.342  | 2.337  | 2.201  | 2.845  | 19889  | RP2      | NM_001290644_X_+1  |
| C8a      | 2.045  | 1.948  | -4.981 | -4.981 | -4.969 | -4.743 | -4.942 | -3.773 | -4.981 | -3.953 | 230558 | C8A      | NM_001290645_4_-1  |
| Lhx2     | -4.981 | -4.981 | -3.937 | -4.414 | -1.810 | -2.673 | -3.099 | -4.901 | -4.981 | -4.981 | 16870  | LHX2     | NM_001290646_2_+1  |
| Insl5    | -4.981 | -4.981 | -4.288 | -2.715 | -4.688 | -4.965 | -4.981 | -4.981 | -4.981 | -4.981 | 23919  | INSL5    | NM_001290648_4_-1  |
| Golga1   | -2.687 | -4.440 | -4.827 | -1.336 | -2.957 | -2.746 | -4.721 | -4.938 | -2.633 | -2.021 | 76899  | GOLGA1   | NM_001290649_2_-1  |
| Scml2    | -4.315 | -3.805 | -4.595 | -4.824 | -4.560 | -3.751 | -4.971 | -4.888 | -4.763 | -4.819 | 107815 | NA       | NM_001290651_X_+1  |
| Scml2    | -2.891 | -0.568 | -4.425 | -1.669 | -1.114 | -2.070 | -4.900 | -2.214 | -3.184 | -2.291 | 107815 | NA       | NM_001290652_X_+1  |
| Ahsa2    | 1.950  | 2.888  | 1.848  | 1.530  | 0.793  | 0.481  | 1.774  | 1.317  | 2.052  | 0.931  | 268390 | NA       | NM_001290654_11_-1 |
| Ahsa2    | 1.075  | 1.456  | 0.680  | 0.410  | 0.289  | -0.034 | -1.464 | 0.387  | 0.622  | -0.257 | 268390 | NA       | NM_001290655_11_-1 |
| Mbd5     | -0.735 | -4.981 | -1.423 | -2.118 | -1.563 | -1.999 | -1.045 | -0.143 | 0.591  | -0.199 | 109241 | MBD5     | NM_001290656_2_+1  |
| Pomgnt1  | -1.064 | -3.161 | -4.308 | -4.506 | -4.050 | -3.264 | -1.761 | -3.135 | -4.588 | -4.670 | 68273  | POMGNT1  | NM_001290658_4_+1  |
| Tanc1    | 0.461  | 1.983  | 1.973  | 2.166  | -1.929 | -1.625 | -1.695 | -1.490 | 0.326  | -4.689 | 66860  | TANC1    | NM_001290659_2_+1  |
| Cd302    | 4.094  | 2.591  | 3.512  | 3.673  | 5.094  | 4.957  | 6.119  | 6.391  | 7.450  | 7.450  | 66205  | CD302    | NM_001290660_2_-1  |
| Sh3kbp1  | -4.901 | -4.872 | -4.929 | -4.963 | -4.925 | -3.080 | -1.290 | -4.349 | -2.891 | -4.981 | 58194  | SH3KBP1  | NM_001290661_X_+1  |
| Kif2c    | -1.262 | -2.687 | -4.223 | -4.829 | -4.911 | -2.346 | -3.804 | -2.603 | -4.922 | -0.530 | 73804  | KIF2C    | NM_001290662_4_-1  |
| Sh3kbp1  | -0.194 | 0.310  | -2.559 | -1.521 | -2.432 | -2.695 | -0.439 | 0.082  | 1.865  | 1.532  | 58194  | SH3KBP1  | NM_001290664_X_+1  |
| Csrnp3   | -4.552 | -4.981 | -4.940 | -4.821 | -4.981 | -4.981 | -4.816 | -4.961 | -4.981 | -4.861 | 77771  | CSRNP3   | NM_001290665_2_+1  |
| Csrnp3   | -3.733 | -4.981 | -4.734 | -4.236 | -4.945 | -4.965 | -4.037 | -4.862 | -4.981 | -4.451 | 77771  | CSRNP3   | NM_001290666_2_+1  |
| Chac2    | -2.631 | 0.268  | 0.412  | 0.942  | 0.288  | 1.451  | -1.520 | 0.300  | -0.080 | -0.114 | 68044  | CHAC2    | NM_001290667_11_-1 |
| Ttc21b   | -0.360 | -0.765 | -3.497 | -2.672 | -1.208 | -1.054 | -0.636 | -0.032 | -1.936 | -0.508 | 73668  | TTC21B   | NM_001290669_2_-1  |
| Cpeb4    | 3.152  | 2.825  | 2.241  | 2.710  | 3.617  | 3.496  | 1.832  | 2.552  | 3.128  | 3.063  | 67579  | CPEB4    | NM_001290676_11_+1 |
| Cpeb4    | 2.872  | 3.202  | 3.902  | 3.408  | 2.885  | 3.776  | 3.282  | 2.820  | 3.322  | 4.046  | 67579  | CPEB4    | NM_001290678_11_+1 |
| Tmem14a  | 0.171  | 0.774  | -0.340 | -1.175 | 1.892  | -0.040 | 0.358  | -0.794 | -0.846 | -0.779 | 75712  | TMEM14A  | NM_001290679_1_+1  |
| Nsg2     | -1.449 | -0.089 | -4.557 | -3.530 | -3.648 | -4.015 | -3.417 | -2.642 | -4.225 | -2.865 | 18197  | HMP19    | NM_001290680_11_+1 |
| Nsg2     | -1.010 | 0.360  | -4.313 | -3.244 | -3.268 | -3.665 | -3.183 | -2.129 | -4.182 | -2.451 | 18197  | HMP19    | NM_001290681_11_+1 |
| Kcnc3    | -4.090 | -4.981 | -4.268 | -4.716 | -4.484 | -4.845 | -4.442 | -4.831 | -4.804 | -4.396 | 16504  | KCNC3    | NM_001290682_7_+1  |
| Smap1    | -4.561 | -4.862 | -4.920 | -4.966 | -4.973 | -4.980 | -4.019 | -4.866 | -4.751 | -4.552 | 98366  | SMAP1    | NM_001290683_1_-1  |
| Med8     | 2.620  | 2.363  | 2.937  | 2.392  | 2.313  | 1.986  | 2.602  | 1.981  | 2.828  | 1.769  | 80509  | MED8     | NM_001290688_4_+1  |
| Naa60    | 3.037  | 3.335  | 1.981  | 2.139  | 2.968  | 2.902  | 3.386  | 2.697  | 3.871  | 4.059  | 74763  | NAA60    | NM_001290689_16_+1 |
| Col9a1   | -4.981 | -4.981 | -4.981 | -4.981 | -4.966 | -4.803 | -4.936 | -4.906 | -4.981 | -4.981 | 12839  | COL9A1   | NM_001290691_1_+1  |
| Akt1s1   | 1.188  | -0.035 | 0.692  | 0.176  | -0.017 | -0.378 | 0.667  | 0.073  | 1.258  | 0.794  | 67605  | AKT1S1   | NM_001290694_7_+1  |
| Akt1s1   | 2.629  | 2.776  | 1.787  | 1.674  | 1.651  | 1.073  | 1.763  | 1.253  | 0.914  | 0.743  | 67605  | AKT1S1   | NM_001290695_7_+1  |
| Foxj3    | 2.280  | 3.764  | 3.343  | 3.505  | 3.394  | 3.807  | 3.507  | 3.283  | 3.631  | 3.515  | 230700 | FOXJ3    | NM_001290696_4_+1  |
| Nudcd2   | 1.430  | 1.235  | 0.060  | 1.036  | -0.119 | -0.991 | -0.618 | -0.488 | -0.875 | 0.597  | 52653  | NUDCD2   | NM_001290697_11_+1 |
| Synj2    | 0.673  | 1.320  | 1.782  | 1.543  | -1.589 | -2.742 | -1.066 | -0.448 | 0.994  | 0.474  | 20975  | SYNJ2    | NM_001290698_17_+1 |
| Zfp451   | 0.650  | 1.239  | -1.866 | -3.501 | -2.767 | -3.192 | -2.327 | -4.790 | -4.135 | 0.287  | 98403  | ZNF451   | NM_001290699_1_-1  |
| Zfp451   | 1.801  | 1.872  | 2.504  | 2.936  | 2.295  | 2.294  | 2.417  | 2.147  | 2.676  | 2.863  | 98403  | ZNF451   | NM_001290700_1_-1  |
| Meaf6    | 3.287  | 3.560  | 4.447  | 4.492  | 4.323  | 4.028  | 3.921  | 3.954  | 3.389  | 3.171  | 70088  | MEAF6    | NM_001290701_4_+1  |
| Slc25a14 | 0.428  | -0.556 | -1.415 | -1.375 | -1.633 | -3.726 | -3.382 | -2.208 | -0.710 | -0.196 | 20523  | SLC25A14 | NM_001290703_X_+1  |
| Slc25a14 | -1.497 | -0.636 | -1.017 | -1.501 | -0.661 | -1.023 | -2.186 | -0.415 | -0.810 | -2.139 | 20523  | SLC25A14 | NM_001290704_X_+1  |
| Slc25a14 | 3.248  | 3.102  | 2.562  | 2.590  | 2.289  | 1.952  | 1.973  | 2.130  | 2.644  | 2.091  | 20523  | SLC25A14 | NM_001290705_X_+1  |
| Pde10a   | -2.227 | -1.098 | -4.716 | -3.566 | -4.465 | -4.741 | -4.391 | -4.803 | -3.307 | -4.981 | 23984  | PDE10A   | NM_001290707_17_+1 |
| Ebf1     | -4.848 | -4.981 | -4.363 | -0.695 | -1.499 | 0.551  | -0.283 | 1.927  | -2.159 | -1.507 | 13591  | EBF1     | NM_001290709_11_+1 |
| Ebf1     | -4.981 | -4.981 | -1.562 | -4.015 | -1.281 | -2.412 | -1.139 | -3.576 | -3.010 | -4.917 | 13591  | EBF1     | NM_001290710_11_+1 |
| Ebf1     | -4.043 | -4.981 | -4.734 | -3.129 | -4.808 | -2.337 | -3.670 | -4.664 | -4.128 | -4.626 | 13591  | EBF1     | NM_001290711_11_+1 |
| Tcp1     | 3.920  | 4.207  | 4.260  | 4.075  | 4.149  | 3.331  | 3.854  | 3.720  | 1.792  | 1.859  | 21454  | TCP1     | NM_001290712_17_+1 |
| Stag2    | 3.324  | 3.675  | 3.792  | 4.008  | 3.904  | 4.108  | 3.793  | 4.091  | 4.782  | 5.936  | 20843  | STAG2    | NM_001290713_X_+1  |
| Adgrb2   | -4.981 | -4.314 | -4.974 | -4.775 | -4.973 | -4.963 | -4.980 | -4.897 | -4.981 | -4.981 | 230775 | ADGRB2   | NM_001290714_4_+1  |
| Adgrb2   | -4.981 | -3.023 | -4.959 | -3.640 | -4.775 | -3.554 | -4.906 | -1.997 | -4.981 | -4.981 | 230775 | ADGRB2   | NM_001290715_4_+1  |
| Suv39h1  | 3.227  | 3.247  | 4.100  | 3.259  | 3.680  | 3.004  | 2.349  | 2.419  | 3.751  | 2.846  | 20937  | SUV39H1  | NM_001290716_X_-1  |
| Syt14    | -4.196 | -4.795 | -4.695 | -3.348 | -4.944 | -4.819 | -4.904 | -4.785 | -3.151 | -4.959 | 27359  | SYTL4    | NM_001290717_X_-1  |

|           |        |        |        |        |        |        |        |        |        |        |        |           |                     |
|-----------|--------|--------|--------|--------|--------|--------|--------|--------|--------|--------|--------|-----------|---------------------|
| Syt14     | -3.513 | -4.778 | -3.865 | -3.890 | -4.903 | -4.076 | -4.637 | -4.345 | -1.639 | -4.953 | 27359  | SYTL4     | NM_001290718_X_-_1  |
| Tsga10    | 0.133  | 0.052  | -3.078 | -4.126 | -2.201 | -2.619 | -1.460 | -0.456 | 1.162  | 0.142  | 211484 | TSGA10    | NM_001290720_1_-_1  |
| Tsga10    | -2.718 | -2.204 | -4.969 | -2.667 | -3.277 | -4.079 | -2.484 | -4.713 | -1.359 | -2.066 | 211484 | TSGA10    | NM_001290721_1_-_1  |
| Ppp1r8    | -0.301 | -0.359 | 0.601  | -0.865 | 1.313  | 0.713  | 1.130  | -0.434 | 0.960  | 1.296  | 100336 | PPP1R8    | NM_001290725_4_-_1  |
| Arid5a    | -4.038 | -3.710 | -4.057 | -4.532 | -4.533 | -4.920 | -4.555 | -4.870 | -4.040 | -4.471 | 214855 | ARID5A    | NM_001290726_1_+_1  |
| Arid5a    | -2.625 | 0.940  | -2.589 | -1.437 | 0.459  | -0.420 | -0.187 | -2.252 | -0.566 | 1.132  | 214855 | ARID5A    | NM_001290727_1_+_1  |
| Taf1      | 4.526  | 4.515  | 4.582  | 4.530  | 4.583  | 4.579  | 4.324  | 4.641  | 4.395  | 4.591  | 270627 | TAF1      | NM_001290729_X_+_1  |
| Osbpl6    | -4.513 | -4.040 | -4.329 | -4.691 | -4.873 | -4.951 | -4.934 | -4.912 | -4.245 | -4.701 | 99031  | OSBPL6    | NM_001290733_2_+_1  |
| Osbpl6    | -2.077 | -2.688 | -0.276 | -1.120 | -2.659 | -3.804 | -3.604 | -3.874 | -0.853 | -2.076 | 99031  | OSBPL6    | NM_001290734_2_+_1  |
| Unkl      | -0.011 | -0.214 | -0.319 | 0.149  | 0.299  | -0.464 | -0.311 | 0.457  | 1.317  | -1.090 | 74154  | UNKL      | NM_001290736_17_+_1 |
| Thg1l     | -2.003 | -1.987 | -2.230 | -2.837 | -2.556 | -3.518 | -3.371 | -3.413 | -2.940 | -0.821 | 66628  | THG1L     | NM_001290737_11_-_1 |
| Taz       | -0.175 | -1.609 | -3.018 | -0.965 | -0.182 | -1.748 | -4.354 | -3.028 | -1.653 | -4.697 | 66826  | TAZ       | NM_001290738_X_+_1  |
| Cwc22     | 3.159  | 2.172  | 2.211  | 1.803  | 2.597  | 2.949  | 2.278  | 0.592  | 3.118  | 2.756  | 80744  | CWC22     | NM_001290740_2_-_1  |
| Cnot6     | 4.913  | 4.705  | 4.915  | 4.851  | 4.871  | 4.744  | 5.007  | 4.810  | 4.316  | 4.742  | 104625 | CNOT6     | NM_001290741_11_-_1 |
| Gpn2      | 1.160  | 1.832  | 0.722  | 0.740  | 0.292  | -0.227 | 0.092  | 0.336  | 0.210  | 0.199  | 100210 | GP2N      | NM_001290742_4_+_1  |
| Ppp1r1c   | -4.981 | -4.981 | -4.830 | -4.973 | -4.845 | -4.806 | -4.981 | -4.981 | -4.981 | -4.981 | 75276  | PPP1R1C   | NM_001290744_2_+_1  |
| Nckap1    | -0.819 | -0.044 | -2.932 | -1.847 | -3.407 | -3.676 | -2.653 | -4.551 | -2.336 | -4.780 | 50884  | NCKAP1    | NM_001290745_2_-_1  |
| Rnf130    | 4.587  | 4.324  | 3.490  | 3.552  | 4.550  | 4.548  | 4.582  | 4.421  | 4.955  | 5.026  | 59044  | RNF130    | NM_001290749_11_+_1 |
| Rnf130    | 0.898  | 0.671  | 0.529  | 0.860  | 1.766  | 1.911  | 1.993  | 1.426  | 2.010  | 2.420  | 59044  | RNF130    | NM_001290750_11_+_1 |
| Tmx2      | 2.411  | 2.750  | 0.887  | 1.638  | 2.095  | 2.190  | 0.060  | 1.671  | -1.279 | -2.066 | 66958  | TMX2      | NM_001290751_2_-_1  |
| Ephb2     | 0.167  | -0.876 | 0.889  | -4.571 | -2.483 | -4.715 | -4.636 | -4.296 | -4.981 | -4.488 | 13844  | EPHB2     | NM_001290753_4_-_1  |
| Tlr7      | 1.626  | 1.912  | -4.742 | -4.916 | -0.025 | 0.522  | 0.215  | 0.420  | 1.896  | 1.771  | 170743 | TLR7      | NM_001290755_X_-_1  |
| Tlr7      | 3.100  | 4.286  | -1.604 | -4.731 | 2.970  | 3.017  | 3.421  | 1.265  | 4.475  | 4.313  | 170743 | TLR7      | NM_001290756_X_-_1  |
| Tlr7      | 5.478  | 5.185  | -0.389 | -1.174 | 3.584  | 3.858  | 3.978  | 3.954  | 4.888  | 5.527  | 170743 | TLR7      | NM_001290757_X_-_1  |
| Tlr7      | 2.423  | 0.257  | -4.737 | -4.807 | 1.291  | -0.986 | -1.477 | 1.356  | 1.845  | 2.338  | 170743 | TLR7      | NM_001290758_X_-_1  |
| Tbc1d9b   | -2.087 | 0.323  | -2.240 | -3.317 | -1.658 | -3.689 | -2.193 | -4.270 | -3.732 | -4.088 | 76795  | TBC1D9B   | NM_001290759_11_+_1 |
| Tbc1d9b   | -1.384 | 0.420  | 1.165  | 0.133  | 2.089  | 0.490  | 0.405  | 0.361  | 2.092  | 2.079  | 76795  | TBC1D9B   | NM_001290760_11_+_1 |
| Nmral1    | 5.739  | 6.558  | 4.807  | 5.300  | 4.996  | 4.356  | 4.493  | 4.759  | 3.929  | 3.614  | 67824  | NMRAL1    | NM_001290761_16_-_1 |
| Nmral1    | 2.261  | 3.106  | 1.252  | 0.495  | 1.463  | 0.944  | 0.507  | 0.944  | 0.388  | -0.056 | 67824  | NMRAL1    | NM_001290762_16_-_1 |
| Nmral1    | 0.841  | 1.572  | -0.701 | -0.795 | -0.221 | -1.609 | -0.877 | -0.847 | -0.796 | -1.588 | 67824  | NMRAL1    | NM_001290763_16_-_1 |
| Pnkp      | 4.964  | 4.364  | 3.580  | 3.954  | 4.392  | 4.415  | 4.406  | 4.703  | 5.643  | 4.933  | 59047  | PNKP      | NM_001290764_7_+_1  |
| Slc39a13  | 2.225  | 1.782  | 2.166  | 1.564  | 1.771  | 2.432  | 2.379  | 1.489  | 2.359  | 2.138  | 68427  | SLC39A13  | NM_001290765_2_-_1  |
| Pnkp      | 2.136  | 2.351  | 2.302  | 1.882  | 2.971  | 2.225  | 2.365  | 2.188  | 4.003  | 2.726  | 59047  | PNKP      | NM_001290766_7_+_1  |
| Pnkp      | -4.751 | 0.804  | -0.967 | -1.472 | 0.121  | -0.708 | -1.695 | -1.792 | 0.516  | -0.103 | 59047  | PNKP      | NM_001290767_7_+_1  |
| Sqstm1    | 5.417  | 5.424  | 6.534  | 6.533  | 5.570  | 5.540  | 5.963  | 5.576  | 5.835  | 5.100  | 18412  | SQSTM1    | NM_001290769_11_-_1 |
| Tro       | -4.981 | -4.981 | -4.290 | -4.954 | -4.231 | -4.879 | -4.981 | -4.981 | -4.981 | -4.981 | 56191  | TRO       | NM_001290770_X_-_1  |
| Large2    | -0.761 | -1.365 | -4.546 | -3.911 | -2.818 | -2.405 | -4.762 | -4.929 | -4.809 | -4.981 | 228366 | LARGE2    | NM_001290773_2_-_1  |
| Large2    | -2.266 | -1.806 | -3.812 | -2.572 | -1.347 | -3.324 | -2.793 | -4.302 | -4.436 | -4.981 | 228366 | LARGE2    | NM_001290774_2_-_1  |
| Large2    | -1.777 | -4.394 | -4.903 | -3.214 | -3.556 | -3.614 | -4.948 | -4.965 | -4.956 | -4.981 | 228366 | LARGE2    | NM_001290775_2_-_1  |
| Txlng     | -0.710 | 1.430  | 0.567  | 0.849  | 0.093  | 0.459  | 0.453  | -0.091 | 0.006  | 1.795  | 353170 | TXLNG     | NM_001290776_X_-_1  |
| Txlng     | -2.681 | -0.184 | -0.460 | 0.316  | -1.561 | -1.524 | -2.149 | -2.735 | -3.041 | -3.088 | 353170 | TXLNG     | NM_001290777_X_-_1  |
| Txlng     | 2.957  | 2.566  | 2.989  | 2.930  | 2.962  | 2.797  | 2.103  | 2.181  | 1.697  | 1.792  | 353170 | TXLNG     | NM_001290778_X_-_1  |
| Zfp879    | -2.208 | -1.038 | -4.979 | -4.940 | -4.962 | -4.705 | -4.584 | -4.912 | -4.981 | -4.227 | 214779 | ZNF879    | NM_001290779_11_-_1 |
| Vma21     | 0.950  | 1.426  | 0.044  | 0.375  | -0.700 | -0.670 | 0.330  | -0.999 | 0.153  | -0.285 | 67048  | NA        | NM_001290780_X_+_1  |
| Vma21     | 2.292  | 3.624  | 0.276  | 0.310  | -1.288 | -2.019 | -2.347 | -2.368 | -2.066 | -0.942 | 67048  | NA        | NM_001290781_X_+_1  |
| Accs      | 1.489  | 1.816  | 2.127  | 1.028  | 1.170  | 0.778  | 0.803  | 1.901  | 2.030  | 2.235  | 329470 | ACC5      | NM_001290782_2_-_1  |
| Wdr13     | 3.918  | 3.335  | 1.992  | 0.400  | 2.009  | 2.353  | 0.794  | 2.255  | 3.097  | 2.613  | 73447  | WDR13     | NM_001290783_X_-_1  |
| Ldlrad3   | -1.919 | -0.008 | -2.783 | -1.092 | -3.181 | -2.438 | -0.380 | -0.002 | 2.815  | 3.012  | 241576 | LDLRAD3   | NM_001290784_2_-_1  |
| Sec24a    | 1.165  | 1.845  | 1.179  | 1.195  | 0.095  | 1.532  | 0.075  | 0.150  | -3.731 | 1.703  | 77371  | SEC24A    | NM_001290785_11_-_1 |
| Aqr       | -1.179 | -2.605 | 0.706  | -2.390 | 0.985  | -2.179 | 1.098  | -0.863 | 1.810  | -0.420 | 11834  | AQR       | NM_001290788_2_-_1  |
| Shroom1   | -4.981 | -4.981 | -0.834 | -1.154 | -4.539 | -4.332 | -2.758 | -3.002 | -2.821 | -1.008 | 71774  | SHROOM1   | NM_001290789_11_+_1 |
| Plcb2     | 2.085  | 4.076  | 1.814  | 3.532  | 1.700  | 3.962  | 2.616  | 3.154  | 2.287  | 3.235  | 18796  | PLCB2     | NM_001290790_2_-_1  |
| Wdr45     | 4.247  | 4.589  | 3.566  | 3.628  | 3.121  | 3.188  | 3.509  | 3.996  | 4.539  | 4.340  | 54636  | WDR45     | NM_001290792_X_+_1  |
| Wdr45     | 4.536  | 3.943  | 2.752  | 2.467  | 2.642  | 2.236  | 2.449  | 2.709  | 2.843  | 3.559  | 54636  | WDR45     | NM_001290794_X_+_1  |
| Wdr45     | 1.432  | 1.071  | -0.150 | 0.053  | -0.893 | -0.522 | -0.224 | -0.263 | 1.535  | 0.491  | 54636  | WDR45     | NM_001290795_X_+_1  |
| Ppp1r14d  | -4.981 | -4.981 | -4.960 | -4.962 | -4.945 | -4.945 | -4.968 | -4.975 | -4.981 | -4.981 | 72112  | PPP1R14D  | NM_001290796_2_-_1  |
| Inpp4a    | 4.162  | 2.855  | 2.525  | 2.455  | -0.012 | 1.948  | 1.033  | 1.960  | 3.884  | 5.390  | 269180 | INPP4A    | NM_001290797_1_+_1  |
| Inpp4a    | -0.986 | -1.810 | -2.230 | -1.155 | -3.037 | -4.120 | -2.673 | -2.488 | -1.909 | -0.663 | 269180 | INPP4A    | NM_001290798_1_+_1  |
| Inpp4a    | -0.712 | -1.562 | -2.559 | -2.712 | -4.407 | -2.927 | -2.789 | -2.157 | -3.180 | -1.219 | 269180 | INPP4A    | NM_001290799_1_+_1  |
| Tyro3     | -4.981 | -4.981 | -4.981 | -4.981 | -4.944 | -4.944 | -4.981 | -4.981 | -4.981 | -4.981 | 22174  | TYRO3     | NM_001290800_2_+_1  |
| Mgat4a    | 2.961  | 3.187  | 1.587  | -0.664 | 2.993  | 2.468  | 3.075  | 2.744  | 1.369  | 1.396  | 269181 | MGAT4A    | NM_001290801_1_-_1  |
| Cd37      | 4.823  | 5.089  | 3.561  | 3.798  | 3.954  | 3.993  | 3.880  | 3.793  | 3.441  | 3.098  | 12493  | CD37      | NM_001290802_7_-_1  |
| Arhgef10l | -3.321 | -2.837 | -4.243 | -4.723 | -4.763 | -4.873 | -3.672 | -4.387 | -1.976 | -2.474 | 72754  | ARHGEF10L | NM_001290803_4_-_1  |
| Cd37      | 5.083  | 4.913  | 4.064  | 3.774  | 4.290  | 3.916  | 3.893  | 3.791  | 3.243  | 3.019  | 12493  | CD37      | NM_001290804_7_-_1  |
| Kif3a     | 4.224  | 4.476  | 2.806  | 3.494  | 2.310  | 3.350  | 1.852  | 2.728  | 2.312  | 2.988  | 16568  | KIF3A     | NM_001290805_11_+_1 |
| Kif3a     | 0.637  | -1.436 | -1.353 | -3.663 | 0.187  | -2.089 | -1.827 | -2.926 | -4.039 | -3.914 | 16568  | KIF3A     | NM_001290806_11_+_1 |
| Haus2     | -3.694 | -3.684 | -0.613 | -4.678 | -2.118 | -4.177 | -1.719 | -4.717 | -0.299 | -2.862 | 66296  | HAUS2     | NM_001290807_2_+_1  |
| Haus2     | 1.300  | -0.342 | 1.009  | 1.456  | 0.973  | -1.157 | 0.979  | 0.327  | 1.544  | 0.941  | 66296  | HAUS2     | NM_001290808_2_+_1  |
| Mrto4     | 5.176  | 5.104  | 4.911  | 5.050  | 5.069  | 5.039  | 5.004  | 4.994  | 4.500  | 4.098  | 69902  | MRT04     | NM_001290810_4_-_1  |
| Adal      | 2.390  | 1.443  | 0.729  | 0.473  | 1.094  | 1.114  | 1.683  | 1.368  | 1.172  | 1.712  | 75894  | ADAL      | NM_001290811_2_+_1  |
| Adal      | -4.981 | -0.117 | -0.850 | -2.207 | -2.433 | -1.956 | -0.964 | -2.063 | -0.719 | -1.227 | 75894  | ADAL      | NM_001290812_2_+_1  |
| Ablim1    | 0.633  | -1.921 | -4.510 | -2.558 | -4.855 | -3.293 | -2.360 | -2.387 | -4.664 | -4.951 | 226251 | ABLIM1    | NM_001290813_19_-_1 |
| Aff3      | 5.430  | 4.803  | 3.958  | 3.760  | 1.426  | 2.385  | 0.226  | 2.691  | -0.440 | -1.785 | 16764  | AFF3      | NM_001290814_1_-_1  |
| Ablim1    | 0.053  | -2.285 | -4.526 | -2.989 | -4.867 | -3.816 | -2.814 | -2.988 | -4.684 | -4.953 | 226251 | ABLIM1    | NM_001290815_19_-_1 |

|            |        |        |        |        |        |        |        |        |        |        |        |          |                    |
|------------|--------|--------|--------|--------|--------|--------|--------|--------|--------|--------|--------|----------|--------------------|
| Ablim1     | 4.318  | 1.484  | -1.913 | -1.498 | 0.164  | 1.793  | -0.121 | 3.464  | -1.085 | -0.678 | 226251 | ABLIM1   | NM_001290816_19_-1 |
| Sparc      | 0.231  | -0.766 | -1.622 | -2.778 | -3.633 | -1.467 | -2.316 | -1.458 | -2.352 | -2.979 | 20692  | SPARC    | NM_001290817_11_-1 |
| Adrbk1     | 6.689  | 6.624  | 7.038  | 6.977  | 7.331  | 7.276  | 7.492  | 7.356  | 8.319  | 8.092  | 110355 | NA       | NM_001290818_19_-1 |
| Zscan29    | 5.360  | 4.859  | 4.216  | 4.100  | 4.096  | 3.738  | 3.955  | 4.154  | 4.537  | 4.677  | 99334  | ZSCAN29  | NM_001290819_2_-1  |
| Zscan29    | 4.058  | 3.735  | 3.166  | 3.117  | 3.139  | 3.214  | 2.951  | 3.060  | 3.754  | 3.596  | 99334  | ZSCAN29  | NM_001290820_2_-1  |
| Bscl2      | 7.330  | 7.522  | 5.665  | 5.709  | 5.698  | 5.657  | 5.994  | 6.179  | 7.019  | 6.918  | 14705  | BSCL2    | NM_001290823_19_+1 |
| Tubgcp4    | 2.254  | 3.234  | 3.107  | 2.868  | 3.012  | 2.401  | 2.824  | 2.886  | 3.359  | 3.418  | 51885  | TUBGCP4  | NM_001290824_2_+1  |
| Col17a1    | 1.893  | 4.160  | -4.745 | -4.760 | 1.871  | 4.592  | 0.288  | 1.865  | -4.959 | -4.415 | 12821  | NA       | NM_001290825_19_-1 |
| Cpeb3      | -4.669 | -3.179 | -4.844 | -4.950 | -2.839 | -2.159 | -4.095 | -3.577 | -4.651 | -1.582 | 208922 | CPEB3    | NM_001290826_19_-1 |
| Cpeb3      | -4.003 | -4.226 | -4.193 | -3.550 | -4.893 | -4.834 | -4.125 | -2.282 | -2.266 | -1.329 | 208922 | CPEB3    | NM_001290827_19_-1 |
| Cpeb3      | -3.967 | -4.214 | -4.037 | -3.611 | -2.865 | -4.871 | -3.785 | -2.818 | -3.847 | -0.110 | 208922 | CPEB3    | NM_001290828_19_-1 |
| Cpeb3      | -1.653 | -3.428 | -2.288 | -1.134 | -3.915 | -1.232 | -2.409 | -0.980 | 0.351  | 0.107  | 208922 | CPEB3    | NM_001290829_19_-1 |
| Trp53bp1   | -0.425 | 3.013  | 1.454  | 1.811  | 2.110  | 1.996  | 1.200  | 1.287  | -0.804 | -0.667 | 27223  | TP53BP1  | NM_001290830_2_-1  |
| Serf2      | 4.072  | 4.283  | 3.790  | 3.542  | 4.137  | 4.007  | 4.077  | 3.539  | 3.228  | 2.793  | 378702 | SERF2    | NM_001290837_2_+1  |
| Myo1b      | -4.981 | -4.981 | -0.519 | 0.348  | 4.839  | 4.591  | 3.270  | 2.056  | -2.117 | -3.961 | 17912  | MYO1B    | NM_001290982_1_-1  |
| Asnsd1     | 4.556  | 4.621  | 4.024  | 4.044  | 4.129  | 4.361  | 3.973  | 2.930  | 2.364  | 2.231  | 70396  | ASNSD1   | NM_001290984_1_-1  |
| Wdr76      | -2.107 | -4.216 | -1.488 | -2.621 | -3.020 | -4.758 | -1.483 | -4.916 | -1.938 | -4.534 | 241627 | WDR76    | NM_001290986_2_+1  |
| Wdr76      | -4.796 | -3.384 | -4.405 | -4.773 | -4.270 | -4.867 | -0.254 | -4.768 | -1.211 | -1.625 | 241627 | WDR76    | NM_001290987_2_+1  |
| Trim11     | 1.606  | -3.045 | 1.374  | -4.564 | 0.487  | -3.492 | -1.067 | -1.955 | 1.221  | -4.683 | 94091  | TRIM11   | NM_001290988_11_+1 |
| Clstn1     | 2.795  | 3.945  | 1.656  | 2.448  | 3.737  | 4.375  | 2.141  | 2.882  | 1.207  | 1.937  | 65945  | CLSTN1   | NM_001290989_4_+1  |
| Lmtk3      | -4.981 | -4.981 | -4.961 | -4.979 | -4.871 | -4.969 | -4.803 | -4.919 | -4.981 | -4.981 | 381983 | LMTK3    | NM_001290990_7_+1  |
| Ctdspl2    | -0.634 | 1.080  | 0.413  | -2.189 | -1.015 | -1.512 | 0.238  | -2.195 | -0.366 | 0.702  | 329506 | CTDSP12  | NM_001290991_2_+1  |
| Ctdspl2    | -1.253 | -0.903 | -1.419 | -1.681 | -0.633 | -1.549 | -4.892 | -2.778 | -4.369 | -0.885 | 329506 | CTDSP12  | NM_001290992_2_+1  |
| Slc30a4    | 4.006  | 1.364  | 1.987  | 1.196  | 1.116  | 1.748  | 2.556  | -0.957 | -0.621 | -0.673 | 22785  | SLC30A4  | NM_001290993_2_-1  |
| Kif1b      | -3.884 | -2.131 | 1.419  | 0.862  | 1.104  | 2.033  | 0.767  | 0.300  | 0.629  | 1.258  | 16561  | KIF1B    | NM_001290995_4_-1  |
| Tulp2      | -1.061 | -4.981 | -4.478 | -3.055 | -1.359 | -2.135 | -1.786 | -2.608 | -2.736 | -2.048 | 56734  | TULP2    | NM_001290996_7_+1  |
| Sema6d     | -4.765 | -4.693 | -4.728 | -3.750 | -4.897 | -4.959 | -4.376 | -4.954 | -4.720 | -4.887 | 214968 | SEMA6D   | NM_001290997_2_+1  |
| Tulp2      | -4.981 | -4.981 | -4.932 | -4.551 | -4.274 | -4.962 | -4.981 | -4.981 | -3.043 | -4.981 | 56734  | TULP2    | NM_001290999_7_+1  |
| Sema6d     | -3.612 | -4.819 | -3.289 | -0.901 | -2.504 | -0.861 | -1.865 | -1.480 | -4.714 | -4.754 | 214968 | SEMA6D   | NM_001291000_2_+1  |
| Tekt5      | -1.224 | -1.961 | -4.799 | -3.702 | -3.056 | -3.820 | -4.978 | -4.914 | -4.981 | -4.981 | 70426  | TEKT5    | NM_001291001_16_-1 |
| Galk2      | 5.565  | 5.249  | 5.046  | 4.989  | 4.551  | 4.529  | 4.611  | 4.532  | 4.442  | 4.529  | 69976  | GALK2    | NM_001291002_2_+1  |
| Astl       | -4.981 | -4.981 | -4.579 | -4.309 | -3.653 | -4.871 | -4.958 | -4.080 | -4.981 | -4.981 | 215095 | ASTL     | NM_001291003_2_+1  |
| H6pd       | -3.614 | 1.066  | -3.622 | -0.524 | -1.221 | -3.393 | -1.515 | -3.379 | 1.708  | 1.875  | 100198 | H6PD     | NM_001291004_4_-1  |
| Kcnip3     | 1.498  | -4.981 | 4.076  | 1.833  | 4.810  | 2.702  | 4.266  | 1.051  | 0.209  | -3.436 | 56461  | KCNIP3   | NM_001291005_2_-1  |
| Tnfrsf25   | -4.981 | -3.633 | -4.305 | -4.094 | -2.189 | -0.652 | -2.843 | -3.256 | -4.981 | -4.642 | 85030  | TNFRSF25 | NM_001291010_4_+1  |
| Nphp1      | 1.779  | 2.170  | 0.709  | 0.492  | -1.217 | -1.024 | -3.198 | -2.297 | -2.263 | -3.779 | 53885  | NPHP1    | NM_001291012_2_-1  |
| Nphp1      | -0.631 | 2.070  | 0.175  | 0.320  | -1.940 | -0.914 | -2.624 | -1.782 | -1.917 | -1.228 | 53885  | NPHP1    | NM_001291013_2_-1  |
| Zkscan17   | 3.646  | 3.327  | 2.751  | 1.596  | 2.117  | 1.446  | 1.969  | -0.713 | 0.743  | 1.449  | 268417 | ZNF496   | NM_001291014_11_-1 |
| Bcl2l11    | 0.714  | 3.086  | 2.566  | 1.999  | -1.382 | -0.465 | -0.497 | 0.789  | 2.126  | 2.550  | 12125  | BCL2L11  | NM_001291016_2_+1  |
| Pdxdc1     | 4.542  | 4.795  | 4.901  | 4.984  | 4.429  | 4.654  | 4.732  | 5.071  | 5.675  | 5.562  | 94184  | PDXDC1   | NM_001291017_16_-1 |
| Sirpa      | -3.561 | -3.087 | -4.281 | -4.540 | -4.485 | -4.807 | -4.103 | -4.618 | -3.666 | -3.932 | 19261  | SIRPA    | NM_001291019_2_+1  |
| Sirpa      | 6.743  | 6.214  | 4.129  | 3.620  | 8.794  | 8.375  | 8.997  | 9.031  | 9.770  | 10.014 | 19261  | SIRPA    | NM_001291020_2_+1  |
| Sirpa      | 0.383  | -1.777 | -4.144 | -4.794 | -1.606 | -4.275 | 0.059  | -4.397 | -3.795 | -0.651 | 19261  | SIRPA    | NM_001291021_2_+1  |
| Sirpa      | 4.977  | 5.690  | 0.587  | 2.261  | 4.446  | 6.628  | 5.214  | 7.179  | 2.580  | 7.080  | 19261  | SIRPA    | NM_001291022_2_+1  |
| Pigq       | -1.560 | -1.116 | -2.031 | -2.529 | -0.735 | -0.699 | -2.196 | -0.399 | 0.557  | -0.793 | 14755  | PIGQ     | NM_001291025_17_-1 |
| Prdm16     | -4.482 | -4.981 | -4.256 | -4.619 | -1.727 | 0.242  | -3.403 | -3.099 | -2.567 | -4.953 | 70673  | PRDM16   | NM_001291026_4_-1  |
| Lzts3      | -4.797 | -4.325 | -2.484 | -3.049 | -2.270 | -1.083 | -4.314 | -2.987 | -4.629 | -0.301 | 241638 | LZTS3    | NM_001291027_2_-1  |
| Lzts3      | -1.793 | -1.897 | -2.193 | -1.084 | -1.412 | -1.352 | -0.812 | -1.251 | -2.280 | -1.220 | 241638 | LZTS3    | NM_001291028_2_-1  |
| Prdm16     | -3.558 | -4.981 | -1.220 | -3.393 | -0.967 | -0.814 | -1.374 | -0.695 | -0.376 | -2.165 | 70673  | PRDM16   | NM_001291029_4_-1  |
| Ap5s1      | 4.125  | 3.202  | 3.019  | 3.374  | 3.249  | 3.238  | 3.252  | 3.289  | 3.441  | 2.891  | 69596  | AP5S1    | NM_001291031_2_+1  |
| Ap5s1      | 0.157  | -0.943 | -1.406 | -1.818 | -1.325 | -1.642 | -3.163 | -3.260 | -0.248 | -0.738 | 69596  | AP5S1    | NM_001291032_2_+1  |
| Mapk7      | 0.765  | 0.847  | 2.723  | 0.577  | 3.264  | 0.134  | 1.741  | 0.394  | 2.027  | 1.756  | 23939  | MAPK7    | NM_001291033_11_-1 |
| Mapk7      | -2.920 | -3.478 | -2.682 | -1.835 | -3.107 | -1.222 | 0.226  | -1.296 | 0.420  | -3.092 | 23939  | MAPK7    | NM_001291034_11_-1 |
| Mapk7      | -0.767 | 0.001  | -0.037 | 0.752  | 1.765  | 1.284  | 1.248  | -0.688 | 2.796  | 1.688  | 23939  | MAPK7    | NM_001291035_11_-1 |
| Mapk7      | 1.514  | 1.425  | 1.284  | -2.688 | 0.884  | 0.335  | 0.268  | -2.006 | 1.117  | -0.943 | 23939  | MAPK7    | NM_001291036_11_-1 |
| Mapk7      | 0.232  | -0.411 | 1.412  | 0.549  | 1.444  | -0.145 | 1.341  | 0.165  | 2.663  | 2.223  | 23939  | MAPK7    | NM_001291037_11_-1 |
| Cds2       | 4.152  | 3.260  | 2.501  | 2.123  | 1.852  | 1.959  | 3.044  | 1.875  | 4.922  | 3.647  | 110911 | CDS2     | NM_001291039_2_+1  |
| Cds2       | 3.297  | 4.052  | 0.776  | 1.312  | 0.955  | 1.805  | 0.853  | 2.065  | 2.759  | 1.867  | 110911 | CDS2     | NM_001291040_2_+1  |
| Tmem220    | 1.551  | 2.028  | 0.210  | 0.943  | 0.124  | 0.673  | 0.633  | 0.768  | 1.888  | 1.205  | 338369 | TMEM220  | NM_001291042_11_+1 |
| Tmem220    | -4.770 | -2.072 | -1.527 | -2.384 | -4.914 | -4.939 | -2.879 | -4.405 | -4.793 | -4.622 | 338369 | TMEM220  | NM_001291043_11_+1 |
| Nudt6      | 3.555  | 4.322  | 3.267  | 3.403  | 2.858  | 3.226  | 2.823  | 2.589  | 2.160  | 1.487  | 229228 | NUDT6    | NM_001291044_3_-1  |
| Grm4       | -4.981 | -4.981 | -4.937 | -4.937 | -3.827 | -2.643 | -4.312 | -4.537 | -4.981 | -4.981 | 268934 | GRM4     | NM_001291045_17_-1 |
| Nudt3      | 0.758  | 0.751  | 0.763  | 0.158  | -0.014 | -1.021 | -0.142 | -0.761 | 0.608  | 0.168  | 56409  | NUDT3    | NM_001291046_17_-1 |
| Ypel1      | -4.253 | -4.156 | -4.580 | -4.870 | -4.751 | -4.955 | -4.740 | -4.890 | -4.417 | -4.664 | 106369 | YPEL1    | NM_001291047_16_+1 |
| D3Ertd751e | 1.079  | 1.167  | -0.395 | -0.787 | 0.637  | 0.588  | 0.281  | -1.302 | -1.658 | -2.242 | 73852  | C4orf33  | NM_001291048_3_+1  |
| Usp43      | -4.981 | -4.981 | -4.981 | -3.891 | -4.981 | -4.981 | -4.962 | -4.590 | -4.981 | -4.981 | 216835 | USP43    | NM_001291049_11_-1 |
| Gpcpd1     | 0.427  | 0.658  | -0.751 | -0.021 | 0.755  | -1.071 | -0.189 | -1.823 | 0.594  | -4.332 | 74182  | GPCPD1   | NM_001291050_2_-1  |
| Gpcpd1     | 1.414  | 2.020  | 0.761  | -0.306 | 0.247  | 0.484  | 1.389  | 0.239  | 1.668  | 1.337  | 74182  | GPCPD1   | NM_001291051_2_-1  |
| Gpcpd1     | 4.567  | 5.107  | 3.895  | 3.953  | 4.050  | 3.850  | 5.072  | 4.867  | 5.405  | 5.984  | 74182  | GPCPD1   | NM_001291052_2_-1  |
| Ypel1      | -1.309 | -2.144 | -2.137 | -1.043 | -2.017 | -2.403 | 0.421  | -0.911 | 0.367  | 0.584  | 106369 | YPEL1    | NM_001291053_16_+1 |
| Mcm8       | 1.504  | 2.015  | 1.372  | 1.800  | 2.441  | 1.340  | 1.700  | 1.134  | -1.759 | -0.324 | 66634  | MCM8     | NM_001291054_2_+1  |
| Lgals8     | 4.202  | 4.024  | 2.473  | 2.582  | 3.832  | 3.908  | 3.534  | 3.440  | 4.533  | 5.154  | 56048  | LGALS8   | NM_001291055_13_-1 |
| Lgals8     | -1.592 | -0.136 | -4.669 | -4.903 | -0.373 | 0.331  | -0.177 | -0.879 | -1.403 | -4.675 | 56048  | LGALS8   | NM_001291057_13_-1 |
| Cd68       | 10.040 | 10.213 | 8.137  | 8.638  | 8.905  | 9.238  | 9.280  | 9.662  | 9.526  | 9.569  | 12514  | CD68     | NM_001291058_11_-1 |

|         |        |        |        |        |        |        |        |        |        |        |           |         |                         |
|---------|--------|--------|--------|--------|--------|--------|--------|--------|--------|--------|-----------|---------|-------------------------|
| Elf2    | 3.699  | 3.447  | 3.234  | 3.230  | 3.264  | 3.069  | 3.371  | 3.293  | 3.212  | 3.451  | 69257     | ELF2    | NM_001291059_3_-1       |
| Lgals8  | -1.639 | -2.828 | -2.516 | -4.518 | -4.386 | -3.336 | -2.123 | -4.456 | -1.989 | -3.521 | 56048     | LGALS8  | NM_001291060_13_-1      |
| Bfsp1   | -3.941 | -4.981 | -4.020 | -4.950 | -4.749 | -4.985 | -2.794 | -1.871 | -0.093 | 0.332  | 12075     | BFSF1   | NM_001291061_2_-1       |
| Elf2    | 4.018  | 3.259  | 3.775  | 3.308  | 3.365  | 3.520  | 3.317  | 2.822  | 2.521  | 2.074  | 69257     | ELF2    | NM_001291062_3_-1       |
| Elf2    | 1.729  | 2.651  | 2.799  | 2.224  | 2.864  | 3.336  | 2.749  | 2.675  | 1.327  | 2.382  | 69257     | ELF2    | NM_001291063_3_-1       |
| SyngR4  | -1.642 | -4.981 | -2.288 | -3.469 | -3.953 | -4.649 | -4.799 | -4.599 | -4.394 | -3.855 | 58867     | SYNGR4  | NM_001291064_7_-1       |
| Adam8   | 0.266  | 0.041  | 8.013  | 7.960  | 7.216  | 6.929  | 5.746  | 5.019  | 4.125  | 4.269  | 11501     | ADAM8   | NM_001291066_7_-1       |
| Polr2a  | 5.271  | 5.186  | 5.550  | 5.316  | 5.918  | 5.718  | 5.759  | 5.449  | 5.917  | 5.578  | 20020     | POLR2A  | NM_001291068_11_-1      |
| Golim4  | 0.516  | -2.785 | 1.719  | 2.418  | 0.764  | 0.003  | 0.479  | 0.473  | 1.940  | 2.135  | 73124     | GOLIM4  | NM_001291069_3_-1       |
| Pfkp    | -1.080 | -1.737 | -2.243 | -0.094 | -1.653 | -4.942 | -0.714 | -0.233 | -0.353 | -4.936 | 56421     | PFKP    | NM_001291071_13_-1      |
| Nsfl1c  | 6.979  | 6.708  | 6.370  | 6.423  | 6.423  | 6.271  | 6.176  | 6.101  | 5.625  | 5.206  | 386649    | NSFL1C  | NM_001291074_2_+1       |
| Gtf2h1  | -3.660 | 2.698  | 1.421  | 2.416  | 1.507  | -0.195 | 0.402  | -0.129 | 1.038  | -0.722 | 14884     | GTF2H1  | NM_001291075_7_+1       |
| Snph    | -3.895 | -3.128 | -4.981 | -4.495 | -4.944 | -3.726 | -4.882 | -2.636 | -4.981 | -4.739 | 241727    | SNPH    | NM_001291076_2_-1       |
| Snph    | 0.046  | 0.500  | -4.892 | -1.208 | -4.478 | -0.353 | -4.786 | -2.745 | -4.981 | -3.590 | 241727    | SNPH    | NM_001291077_2_-1       |
| Dpf2    | 1.820  | 0.325  | 0.794  | 0.793  | 1.281  | 1.988  | 0.482  | 1.137  | 1.904  | 1.997  | 19708     | DPF2    | NM_001291078_19_-1      |
| Drap1   | 3.027  | 0.895  | 3.304  | 1.643  | 2.623  | 1.495  | 3.256  | 0.973  | 2.954  | 1.065  | 66556     | DRAP1   | NM_001291080_19_-1      |
| Gm3383  | -0.671 | -4.810 | -3.553 | -4.969 | -4.648 | -4.809 | -4.980 | -4.979 | -4.981 | -4.981 | 100041515 | NA      | NM_001291093_14_-1      |
| Gm3383  | 0.253  | -4.810 | -3.542 | -4.969 | -4.937 | -4.788 | -4.980 | -4.979 | -4.981 | -4.981 | 100041515 | NA      | NM_001291093_dup1_14_-2 |
| Gm3383  | 1.022  | -3.597 | -1.821 | -4.756 | -3.113 | -2.937 | -4.369 | -4.894 | -4.981 | -4.981 | 100041515 | NA      | NM_001291094_14_-1      |
| Gm3383  | 1.921  | -3.597 | -1.370 | -4.742 | -3.014 | -1.831 | -4.369 | -4.894 | -4.981 | -4.981 | 100041515 | NA      | NM_001291094_dup1_14_-2 |
| Fgf11   | -3.456 | -4.981 | -0.597 | -0.811 | -3.289 | -2.209 | -1.245 | -2.093 | -2.961 | -0.434 | 14166     | FGF11   | NM_001291104_11_-1      |
| E2f1    | 4.455  | 4.472  | 3.001  | 3.115  | 2.707  | 1.922  | 3.198  | 2.993  | 3.853  | 3.632  | 13555     | E2F1    | NM_001291105_2_-1       |
| Dynlrb1 | 2.218  | -0.431 | 0.418  | -3.313 | 0.336  | -2.213 | 1.145  | -2.096 | -0.284 | -2.420 | 67068     | DYNLRB1 | NM_001291108_2_+1       |
| Gss     | 2.304  | 0.514  | -0.260 | 1.432  | -0.058 | -0.436 | 1.904  | 0.971  | 2.380  | 1.262  | 14854     | GSS     | NM_001291111_2_-1       |
| Rbm39   | 6.831  | 6.972  | 6.660  | 6.387  | 6.976  | 7.089  | 6.855  | 6.874  | 6.384  | 6.578  | 170791    | RBM39   | NM_001291114_2_-1       |
| Rbm39   | 0.072  | 0.742  | 0.440  | 0.370  | 0.829  | 0.341  | 0.271  | -0.220 | 1.266  | 1.946  | 170791    | RBM39   | NM_001291115_2_-1       |
| Neurl4  | 1.217  | -0.160 | 0.937  | 0.252  | 0.453  | 0.041  | 1.063  | 1.498  | 1.181  | 1.018  | 216860    | NEURL4  | NM_001291118_11_+1      |
| Neurl4  | 2.777  | 3.036  | 1.891  | 1.950  | 2.472  | 3.022  | 1.993  | 0.901  | 1.402  | 0.793  | 216860    | NEURL4  | NM_001291119_11_+1      |
| Epb41l1 | -4.600 | -4.350 | -4.677 | -4.904 | -4.679 | -4.743 | -4.395 | -4.955 | -4.770 | -4.551 | 13821     | EPB41L1 | NM_001291120_2_+1       |
| Epb41l1 | -4.333 | -4.293 | -4.610 | -4.837 | -4.319 | -4.910 | -3.829 | -3.075 | -4.726 | -0.553 | 13821     | EPB41L1 | NM_001291121_2_+1       |
| Epb41l1 | -0.855 | -1.840 | -1.713 | -1.272 | -2.305 | -0.689 | -1.254 | 0.048  | 0.610  | 0.726  | 13821     | EPB41L1 | NM_001291122_2_+1       |
| Epb41l1 | -1.579 | -1.635 | -1.607 | -1.593 | -3.239 | -0.942 | -1.672 | -1.040 | -1.551 | 0.507  | 13821     | EPB41L1 | NM_001291123_2_+1       |
| Tgif2   | -0.328 | -4.839 | -1.439 | -1.814 | 0.116  | 0.438  | -0.512 | -1.252 | -2.075 | 0.295  | 228839    | TGIF2   | NM_001291124_2_+1       |
| Phf23   | 0.811  | 2.731  | 2.343  | 2.497  | 1.912  | 2.211  | 0.788  | 2.379  | 2.088  | 2.136  | 78246     | PHF23   | NM_001291125_11_+1      |
| Phf23   | 3.856  | 3.596  | 3.355  | 3.028  | 2.362  | 2.514  | 2.905  | 2.518  | 0.650  | -0.690 | 78246     | PHF23   | NM_001291126_11_+1      |
| Phf23   | 2.066  | 2.172  | 2.958  | 3.980  | 2.507  | 2.670  | 2.852  | 3.221  | 4.397  | 4.551  | 78246     | PHF23   | NM_001291127_11_+1      |
| Nnat    | -4.636 | -4.185 | -4.875 | -4.806 | -4.980 | -4.978 | -4.790 | -4.955 | -4.981 | -4.946 | 18111     | NNAT    | NM_001291128_2_+1       |
| Nnat    | -4.571 | -4.067 | -4.893 | -4.935 | -4.980 | -4.976 | -4.764 | -4.952 | -4.981 | -4.934 | 18111     | NNAT    | NM_001291129_2_+1       |
| Nnat    | -4.030 | -3.205 | -4.687 | -4.817 | -4.959 | -4.928 | -4.511 | -4.934 | -4.981 | -4.778 | 18111     | NNAT    | NM_001291130_2_+1       |
| Rprd1b  | 3.503  | 2.919  | 4.043  | 3.429  | 3.760  | 3.632  | 3.685  | 3.723  | 4.073  | 4.118  | 70470     | RPRD1B  | NM_001291134_2_+1       |
| Rprd1b  | -0.186 | 2.179  | 2.093  | 2.330  | 2.531  | 1.414  | 1.499  | 1.166  | 1.820  | 2.178  | 70470     | RPRD1B  | NM_001291135_2_+1       |
| Rprd1b  | 0.330  | -0.444 | 0.094  | -0.235 | 0.589  | 0.374  | 0.694  | -0.003 | 2.063  | 1.049  | 70470     | RPRD1B  | NM_001291136_2_+1       |
| Ralgapb | 2.512  | 2.192  | 1.422  | 1.677  | 1.539  | 1.347  | 0.663  | -0.183 | -1.115 | -0.123 | 228850    | RALGAPB | NM_001291137_2_+1       |
| Ralgapb | 4.175  | 4.179  | 4.743  | 4.271  | 5.177  | 4.991  | 5.080  | 4.239  | 4.876  | 4.945  | 228850    | RALGAPB | NM_001291138_2_+1       |
| Rabep1  | -0.533 | -0.463 | 0.885  | -0.512 | -0.259 | -0.582 | -0.611 | -0.501 | -0.047 | 0.440  | 54189     | RABEP1  | NM_001291141_11_+1      |
| Rabep1  | -1.896 | -4.528 | -1.695 | -3.601 | -4.894 | -2.846 | -3.127 | -2.644 | -4.477 | -4.718 | 54189     | RABEP1  | NM_001291142_11_+1      |
| Rabep1  | 0.821  | -0.798 | 0.569  | 0.961  | -0.202 | 1.037  | 0.317  | 0.947  | -1.186 | -1.231 | 54189     | RABEP1  | NM_001291143_11_+1      |
| Dhx35   | 2.567  | 2.512  | 4.749  | 4.272  | 2.538  | 2.836  | 2.862  | 2.491  | 3.561  | 3.580  | 71715     | DHX35   | NM_001291144_2_+1       |
| Derl2   | 0.093  | 0.127  | 1.014  | 1.343  | -0.642 | -0.434 | -0.115 | -0.180 | 0.199  | -0.226 | 116891    | DERL2   | NM_001291146_11_-1      |
| Derl2   | 0.883  | 2.061  | 0.713  | 0.966  | -0.861 | -2.273 | -0.962 | -0.895 | -0.609 | 0.849  | 116891    | DERL2   | NM_001291147_11_-1      |
| Derl2   | 2.661  | 2.916  | 2.442  | 2.372  | 1.025  | 1.363  | -0.049 | 1.807  | 1.098  | -0.378 | 116891    | DERL2   | NM_001291148_11_-1      |
| Xaf1    | 3.545  | 2.894  | 1.153  | -0.194 | 2.389  | 1.562  | 3.382  | 2.261  | 3.311  | 2.876  | 327959    | XAF1    | NM_001291153_11_+1      |
| Sgk2    | -4.981 | -4.981 | -4.981 | -4.981 | -4.981 | -4.981 | -4.954 | -4.968 | -4.981 | -4.981 | 27219     | SGK2    | NM_001291154_2_+1       |
| Tomm34  | 6.044  | 5.918  | 6.553  | 6.636  | 6.298  | 6.339  | 5.869  | 5.805  | 5.365  | 5.382  | 67145     | TOMM34  | NM_001291155_2_-1       |
| Tlcd2   | 2.195  | 3.520  | 0.629  | 1.254  | -1.304 | 1.377  | -0.666 | -0.393 | -2.228 | -0.675 | 380712    | TLCD2   | NM_001291156_11_+1      |
| Zmynd8  | -2.061 | -4.981 | -2.544 | -1.643 | -2.499 | -1.801 | -1.492 | -1.967 | -1.429 | -0.197 | 228880    | ZMYND8  | NM_001291158_2_-1       |
| Rph3al  | -4.981 | -4.981 | -4.959 | -4.959 | -4.237 | -4.021 | -4.790 | -4.116 | -4.981 | -4.316 | 380714    | RPH3AL  | NM_001291159_11_-1      |
| Stau1   | 1.280  | 1.020  | 0.208  | 0.401  | 0.105  | 0.908  | 0.245  | 1.222  | 1.995  | 1.333  | 20853     | STAU1   | NM_001291160_2_-1       |
| Timm22  | -1.367 | -2.482 | -3.809 | -3.581 | -4.024 | -2.764 | -2.583 | -2.965 | -4.877 | -2.076 | 56322     | TIMM22  | NM_001291161_11_+1      |
| Znfx1   | 3.333  | 3.456  | 2.673  | 3.542  | 3.712  | 3.876  | 3.632  | 3.110  | 3.654  | 3.360  | 98999     | ZNFX1   | NM_001291162_2_-1       |
| Nfatc2  | -3.901 | -4.410 | -4.337 | -4.907 | -4.872 | -4.956 | -4.533 | -4.896 | -4.001 | -4.554 | 18019     | NFATC2  | NM_001291168_2_-1       |
| Nfatc2  | -4.153 | -4.433 | -4.287 | -4.893 | -4.886 | -4.959 | -4.567 | -4.917 | -4.032 | -4.486 | 18019     | NFATC2  | NM_001291169_2_-1       |
| Nfatc2  | -4.431 | -4.661 | -4.497 | -4.958 | -4.954 | -4.968 | -4.837 | -4.960 | -4.439 | -4.844 | 18019     | NFATC2  | NM_001291170_2_-1       |
| Nfatc2  | -4.272 | -4.847 | -4.630 | -4.933 | -4.959 | -4.967 | -4.189 | -4.939 | -4.560 | -4.859 | 18019     | NFATC2  | NM_001291171_2_-1       |
| Nfatc2  | -4.907 | -4.981 | -4.918 | -4.983 | -4.981 | -4.981 | -4.958 | -4.980 | -4.748 | -4.945 | 18019     | NFATC2  | NM_001291172_2_-1       |
| Nfatc2  | -3.801 | -4.852 | -4.598 | -4.865 | -4.951 | -4.964 | -3.855 | -4.903 | -4.557 | -4.878 | 18019     | NFATC2  | NM_001291173_2_-1       |
| Nfatc2  | -4.551 | -4.674 | -4.549 | -4.979 | -4.961 | -4.970 | -4.858 | -4.966 | -4.438 | -4.824 | 18019     | NFATC2  | NM_001291174_2_-1       |
| Nfatc2  | -3.814 | -3.621 | -1.139 | -0.622 | 0.006  | -1.465 | -1.627 | -1.972 | -0.419 | -0.199 | 18019     | NFATC2  | NM_001291175_2_-1       |
| Nfatc2  | -3.279 | -1.763 | -2.630 | -3.180 | -3.606 | -4.042 | -3.556 | -4.890 | -4.517 | -4.800 | 18019     | NFATC2  | NM_001291176_2_-1       |
| Nfatc2  | -2.111 | -2.434 | -0.603 | 0.437  | 0.482  | -0.943 | -0.916 | -0.956 | 0.142  | -1.328 | 18019     | NFATC2  | NM_001291177_2_-1       |
| Nfatc2  | -0.132 | -0.795 | -2.883 | -3.213 | -1.731 | -2.937 | -2.642 | -4.885 | -4.509 | -4.826 | 18019     | NFATC2  | NM_001291178_2_-1       |
| Nfatc2  | -4.659 | -4.981 | -4.653 | -4.614 | -4.689 | -4.960 | -4.827 | -4.953 | -4.539 | -4.894 | 18019     | NFATC2  | NM_001291179_2_-1       |
| Pcsk6   | -4.981 | -4.981 | -3.251 | -1.232 | -4.715 | -4.559 | -4.973 | -4.840 | -4.981 | -3.642 | 18553     | PCSK6   | NM_001291184_7_+1       |
| Aurka   | 0.109  | 0.515  | 2.935  | 3.546  | 4.290  | 3.830  | 3.627  | 3.250  | 2.383  | 2.222  | 20878     | AURKA   | NM_001291185_2_-1       |

|               |        |        |        |        |        |        |        |        |        |        |        |         |                     |
|---------------|--------|--------|--------|--------|--------|--------|--------|--------|--------|--------|--------|---------|---------------------|
| Abr           | 4.937  | 4.258  | 4.871  | 4.767  | 5.252  | 5.528  | 5.599  | 5.209  | 5.063  | 5.414  | 109934 | ABR     | NM_001291186_11_-_1 |
| Ssh2          | 4.799  | 4.987  | 4.443  | 4.364  | 6.171  | 5.974  | 6.512  | 6.487  | 7.736  | 7.445  | 237860 | SSH2    | NM_001291190_11_+_1 |
| Mef2a         | 3.864  | 5.136  | 3.676  | 3.468  | 2.853  | 3.146  | 3.909  | 3.749  | 4.843  | 5.040  | 17258  | MEF2A   | NM_001291191_7_-_1  |
| Mef2a         | 3.864  | 5.136  | 3.676  | 3.468  | 2.853  | 3.146  | 3.909  | 3.749  | 4.843  | 5.040  | 17258  | MEF2A   | NM_001291192_7_-_1  |
| Mef2a         | 5.813  | 6.458  | 5.743  | 5.483  | 5.038  | 5.074  | 5.854  | 5.946  | 7.587  | 7.500  | 17258  | MEF2A   | NM_001291195_7_-_1  |
| Mef2a         | -3.837 | -0.760 | -2.838 | -2.519 | -1.179 | -2.872 | -2.677 | -2.818 | -1.572 | -0.094 | 17258  | MEF2A   | NM_001291196_7_-_1  |
| Tpd52l2       | -0.483 | 1.055  | -1.376 | -1.566 | -1.415 | -0.288 | -1.463 | -0.149 | -1.223 | -0.241 | 66314  | TPD52L2 | NM_001291197_2_+_1  |
| Tpd52l2       | 6.103  | 6.199  | 5.682  | 5.680  | 5.656  | 5.546  | 5.803  | 5.801  | 5.951  | 5.804  | 66314  | TPD52L2 | NM_001291200_2_+_1  |
| Tpd52l2       | -4.763 | -4.241 | -4.718 | -2.807 | -2.206 | -4.718 | -4.681 | -1.356 | -4.656 | -1.485 | 66314  | TPD52L2 | NM_001291201_2_+_1  |
| Tpd52l2       | -4.625 | 1.234  | -1.129 | -1.009 | 0.024  | -1.116 | -2.057 | -0.512 | -4.203 | -1.079 | 66314  | TPD52L2 | NM_001291202_2_+_1  |
| Tpd52l2       | 2.744  | 3.287  | 1.404  | 2.013  | 2.002  | 1.927  | 2.449  | 2.327  | 2.467  | 2.288  | 66314  | TPD52L2 | NM_001291203_2_+_1  |
| Tpd52l2       | -1.195 | -0.321 | -0.356 | -1.999 | -1.614 | -2.726 | -0.768 | -1.330 | -0.397 | -4.981 | 66314  | TPD52L2 | NM_001291204_2_+_1  |
| Rgs19         | 5.149  | 5.275  | 5.504  | 4.916  | 6.142  | 5.896  | 5.423  | 5.101  | 5.425  | 4.748  | 56470  | RGS19   | NM_001291205_2_-_1  |
| Rgs19         | 2.491  | 2.582  | 3.606  | 3.379  | 3.962  | 3.872  | 3.596  | 3.313  | 3.885  | 4.006  | 56470  | RGS19   | NM_001291206_2_-_1  |
| Rgs19         | 5.564  | 5.836  | 4.857  | 4.781  | 4.903  | 4.218  | 4.922  | 4.736  | 5.035  | 5.196  | 56470  | RGS19   | NM_001291207_2_-_1  |
| Rgs19         | 1.273  | 1.144  | 1.057  | 1.239  | 1.578  | 1.129  | 1.640  | 1.333  | 2.558  | 1.707  | 56470  | RGS19   | NM_001291208_2_-_1  |
| Rgs19         | -0.376 | 0.009  | 1.327  | 1.167  | 1.503  | 1.451  | 0.891  | 0.879  | 1.495  | 1.610  | 56470  | RGS19   | NM_001291209_2_-_1  |
| Rgs19         | 4.649  | 3.483  | 2.926  | 2.134  | 2.460  | 2.628  | 2.944  | 2.457  | 2.181  | 1.410  | 56470  | RGS19   | NM_001291210_2_-_1  |
| Pcmdt2        | -3.438 | 0.618  | 0.109  | -0.890 | 0.497  | -0.189 | -0.754 | -0.079 | 1.406  | -0.625 | 245867 | PCMTD2  | NM_001291211_2_+_1  |
| Myo18a        | 0.000  | 0.318  | 0.780  | 1.611  | 0.293  | -0.683 | 0.451  | -1.207 | 0.212  | -2.225 | 360013 | MYO18A  | NM_001291212_11_+_1 |
| Myo18a        | -2.793 | -2.267 | -2.539 | -0.801 | -1.532 | -2.741 | -1.526 | -4.028 | -3.433 | -4.061 | 360013 | MYO18A  | NM_001291213_11_+_1 |
| Myo18a        | 4.774  | 5.099  | 3.057  | 3.947  | 2.896  | 3.193  | 3.550  | 3.628  | 4.420  | 4.102  | 360013 | MYO18A  | NM_001291214_11_+_1 |
| Myo18a        | 0.817  | 0.198  | -1.809 | -0.447 | -3.388 | -0.644 | -0.658 | -2.190 | 1.264  | -3.154 | 360013 | MYO18A  | NM_001291215_11_+_1 |
| Isg20         | -4.981 | -3.048 | -2.447 | -1.899 | 0.502  | 0.471  | 0.437  | -0.859 | 0.540  | -0.360 | 57444  | ISG20   | NM_001291220_7_+_1  |
| Isg20         | 2.623  | -2.210 | 3.010  | -0.023 | 5.018  | 1.689  | 4.098  | 2.827  | 1.989  | -0.750 | 57444  | ISG20   | NM_001291221_7_+_1  |
| Kif7          | -0.668 | 0.394  | -2.781 | -2.079 | -3.138 | -4.015 | -3.099 | -1.377 | -3.960 | -0.238 | 16576  | KIF7    | NM_001291222_7_-_1  |
| Rbm47         | 0.768  | 0.812  | 0.726  | 0.599  | 0.660  | 0.726  | -1.157 | -0.119 | 0.513  | 1.155  | 245945 | RBM47   | NM_001291226_5_-_1  |
| Clip1         | 2.900  | 3.101  | 3.773  | 4.084  | 4.542  | 4.444  | 4.247  | 4.345  | 4.799  | 4.953  | 56430  | CLIP1   | NM_001291229_5_-_1  |
| Cux1          | 1.759  | -3.722 | 1.427  | -0.077 | 0.741  | 0.964  | 1.900  | 2.607  | 4.026  | 3.964  | 13047  | NA      | NM_001291233_5_-_1  |
| Cux1          | 1.618  | 2.495  | 0.978  | -0.677 | 2.200  | 1.636  | 2.261  | 1.234  | 2.342  | 2.619  | 13047  | NA      | NM_001291234_5_-_1  |
| Tlcd1         | -1.482 | -1.240 | -1.440 | -1.725 | -2.632 | -3.652 | -2.488 | -4.651 | -4.674 | -3.986 | 68385  | TLCD1   | NM_001291235_11_+_1 |
| Tlcd1         | -2.255 | -1.839 | -1.883 | -2.551 | -3.872 | -2.232 | -4.850 | -2.220 | -3.784 | -2.192 | 68385  | TLCD1   | NM_001291236_11_+_1 |
| Tlcd1         | -2.095 | -1.877 | -1.982 | -2.139 | -4.929 | -4.945 | -2.600 | -1.785 | -1.195 | -2.137 | 68385  | TLCD1   | NM_001291237_11_+_1 |
| Cux1          | 2.656  | 2.524  | 3.425  | 2.449  | 2.299  | 1.071  | 3.472  | 1.782  | 4.291  | 3.178  | 13047  | NA      | NM_001291238_5_-_1  |
| Cux1          | -4.751 | -4.981 | -3.494 | -4.961 | -3.247 | -4.768 | -1.478 | -4.808 | -4.122 | -4.799 | 13047  | NA      | NM_001291239_5_-_1  |
| Cux1          | -4.770 | -4.855 | -3.721 | -4.939 | -4.621 | -4.848 | -2.787 | -4.897 | -4.240 | -4.832 | 13047  | NA      | NM_001291240_5_-_1  |
| Cct6b         | -0.495 | -1.272 | -2.319 | -3.954 | -2.927 | -4.557 | -4.072 | -2.676 | -4.401 | -4.974 | 12467  | CCT6B   | NM_001291242_11_-_1 |
| Lig3          | 2.152  | 0.959  | 1.965  | 1.993  | 2.080  | 1.843  | 0.675  | 1.501  | 2.997  | 2.809  | 16882  | LIG3    | NM_001291245_11_+_1 |
| Lig3          | 0.867  | 1.816  | 2.144  | 0.132  | 2.104  | -0.436 | 0.841  | 0.308  | 2.693  | 2.134  | 16882  | LIG3    | NM_001291246_11_+_1 |
| Lig3          | 0.975  | 0.353  | 2.261  | 2.182  | 1.069  | -0.216 | 2.007  | 1.275  | 2.175  | 2.126  | 16882  | LIG3    | NM_001291247_11_+_1 |
| Cpsf4         | 3.285  | 3.779  | 2.899  | 2.814  | 3.782  | 3.335  | 3.771  | 3.307  | 3.799  | 3.534  | 54188  | CPSF4   | NM_001291248_5_+_1  |
| Cpsf4         | 3.686  | 3.538  | 3.196  | 2.774  | 3.146  | 2.545  | 2.965  | 3.061  | 3.495  | 2.910  | 54188  | CPSF4   | NM_001291249_5_+_1  |
| Hnf1b         | -4.981 | -4.981 | -4.965 | -4.965 | -3.286 | -4.426 | -4.886 | -4.952 | -4.981 | -4.981 | 21410  | HNFB1B  | NM_001291268_11_+_1 |
| Hnf1b         | -4.981 | -4.981 | -4.718 | -4.938 | -1.949 | -4.544 | -4.809 | -4.759 | -4.981 | -4.981 | 21410  | HNFB1B  | NM_001291269_11_+_1 |
| Mrps23        | -2.077 | -2.773 | -3.139 | -1.980 | -4.008 | -4.662 | -2.068 | -0.746 | -2.652 | -3.795 | 64656  | MRPS23  | NM_001291270_11_+_1 |
| Mrps23        | -0.482 | 0.544  | -0.533 | -0.316 | -1.393 | -0.557 | -1.791 | -0.615 | -1.213 | -0.153 | 64656  | MRPS23  | NM_001291271_11_+_1 |
| Mrps23        | 1.904  | 2.949  | 1.426  | 2.129  | 0.977  | 1.679  | 0.658  | 2.059  | 1.566  | 1.557  | 64656  | MRPS23  | NM_001291272_11_+_1 |
| Mrps23        | -1.906 | -4.750 | -2.744 | -4.068 | -4.908 | -4.951 | -1.547 | -4.857 | -4.690 | -4.941 | 64656  | MRPS23  | NM_001291273_11_+_1 |
| Cib1          | 0.861  | 0.608  | -2.913 | -3.222 | -0.796 | -1.188 | -2.070 | -3.507 | -2.127 | -4.981 | 23991  | CIB1    | NM_001291275_7_-_1  |
| Cib1          | 2.818  | 2.419  | 0.606  | 0.190  | 0.387  | 0.992  | 1.287  | 0.615  | 1.394  | 1.068  | 23991  | CIB1    | NM_001291276_7_-_1  |
| Nmb           | -0.442 | 0.982  | -1.223 | -1.888 | -0.461 | 0.088  | -0.534 | -0.278 | -2.031 | -2.524 | 68039  | NMB     | NM_001291280_7_-_1  |
| Tm6sf1        | 1.810  | 1.780  | 5.142  | 5.175  | 4.492  | 4.772  | 5.812  | 5.836  | 6.023  | 7.278  | 107769 | TM6SF1  | NM_001291282_7_+_1  |
| Hikeshi       | -1.456 | -1.838 | -1.389 | -2.326 | -2.280 | -3.350 | -1.619 | -2.920 | -4.981 | -2.217 | 67669  | HIKESHI | NM_001291286_7_-_1  |
| Hikeshi       | -2.509 | -4.981 | -4.902 | -4.033 | -3.219 | -4.865 | -3.270 | -3.939 | -4.981 | -4.981 | 67669  | HIKESHI | NM_001291287_7_-_1  |
| Hikeshi       | -0.500 | 0.195  | -0.463 | -1.037 | -0.452 | -0.958 | -0.779 | -1.538 | -0.407 | -3.351 | 67669  | HIKESHI | NM_001291288_7_-_1  |
| Hikeshi       | 2.564  | 2.591  | 2.479  | 2.064  | 2.180  | 2.019  | 2.555  | 2.111  | 1.807  | 1.738  | 67669  | HIKESHI | NM_001291289_7_-_1  |
| 2210011C24Rik | -1.783 | -3.408 | -4.288 | -4.354 | -4.269 | -4.609 | -4.751 | -2.941 | -4.981 | -4.981 | 70134  | NA      | NM_001291292_8_-_1  |
| Plekhb1       | -4.981 | -2.437 | -3.690 | -4.436 | -3.987 | -4.192 | -4.884 | -2.530 | -3.394 | -4.479 | 27276  | PLEKHB1 | NM_001291336_7_-_1  |
| Anapc15       | -1.971 | -0.852 | -2.361 | -0.349 | -3.159 | -1.397 | -2.079 | -4.803 | -1.868 | -1.908 | 75430  | NA      | NM_001291348_7_+_1  |
| Anapc15       | -0.053 | 0.573  | -2.385 | -0.117 | -0.068 | -0.851 | -0.409 | -0.740 | -4.320 | -4.142 | 75430  | NA      | NM_001291349_7_+_1  |
| Anapc15       | 3.718  | 3.402  | 3.532  | 3.525  | 2.684  | 2.429  | 2.567  | 2.435  | 1.572  | 1.624  | 75430  | NA      | NM_001291352_7_+_1  |
| Anapc15       | 3.848  | 3.402  | 3.831  | 3.580  | 3.050  | 3.138  | 3.120  | 2.908  | 1.572  | 1.624  | 75430  | NA      | NM_001291353_7_+_1  |
| Art5          | -1.708 | -4.981 | -4.981 | -4.981 | -3.725 | -4.859 | -4.981 | -4.981 | -4.981 | -4.981 | 11875  | ART5    | NM_001291354_7_-_1  |
| Pgap2         | 3.370  | 1.158  | 2.197  | -2.007 | 2.133  | -1.823 | 1.952  | -0.822 | 1.359  | -2.150 | 233575 | NA      | NM_001291358_7_+_1  |
| Dido1         | 1.557  | 1.385  | 1.894  | 1.523  | 2.353  | 2.248  | 1.725  | 1.403  | 2.471  | 1.541  | 23856  | DIDO1   | NM_001291432_2_-_1  |
| Dido1         | 1.047  | 1.988  | 2.390  | 2.022  | 1.554  | 1.852  | 1.519  | 1.522  | 1.677  | 1.907  | 23856  | DIDO1   | NM_001291433_2_-_1  |
| Prkcg         | 2.349  | 3.510  | -0.091 | -1.495 | -1.348 | -0.646 | -1.063 | -1.404 | 1.027  | -0.086 | 18752  | PRKCG   | NM_001291434_7_+_1  |
| Hmgcs1        | 6.422  | 6.438  | 5.239  | 3.936  | 4.577  | 4.147  | 4.726  | 5.337  | 5.103  | 5.754  | 208715 | HMGCS1  | NM_001291439_13_+_1 |
| Rad51c        | -3.170 | -4.372 | -0.349 | -2.047 | -0.081 | 0.720  | -0.437 | -0.659 | -0.768 | -1.231 | 114714 | RAD51C  | NM_001291440_11_-_1 |
| Fbxw10        | 0.641  | 1.941  | -0.393 | -1.768 | -3.209 | -1.209 | -2.143 | -2.686 | -1.587 | -3.918 | 213980 | FBXW10  | NM_001291441_11_+_1 |
| Micu1         | -4.439 | -4.076 | -4.509 | -4.785 | -2.574 | -4.174 | -4.354 | -4.868 | -2.646 | -4.747 | 216001 | MICU1   | NM_001291442_10_+_1 |
| Micu1         | -4.414 | -4.048 | -4.480 | -4.767 | -3.330 | -3.608 | -4.296 | -4.859 | -2.083 | -4.725 | 216001 | MICU1   | NM_001291443_10_+_1 |
| Pacs2         | 1.839  | -0.145 | 0.793  | 1.476  | 1.852  | 1.117  | 1.908  | 2.652  | 3.508  | 3.429  | 217893 | PACS2   | NM_001291444_12_+_1 |
| Pacs2         | -0.142 | -3.256 | -0.912 | -0.217 | -0.330 | -1.035 | -0.259 | -2.113 | 1.117  | 0.701  | 217893 | PACS2   | NM_001291445_12_+_1 |

|          |        |        |        |        |        |        |        |        |        |        |        |         |                    |
|----------|--------|--------|--------|--------|--------|--------|--------|--------|--------|--------|--------|---------|--------------------|
| Foxred1  | 5.429  | 5.036  | 5.038  | 4.965  | 5.450  | 5.016  | 5.190  | 4.866  | 5.403  | 5.158  | 235169 | FOXRED1 | NM_001291448_9_-1  |
| Foxred1  | 0.601  | 0.919  | -1.807 | -2.326 | -0.228 | 0.477  | 0.858  | -1.798 | 0.720  | -1.494 | 235169 | FOXRED1 | NM_001291449_9_-1  |
| Dpysl3   | -1.977 | -4.981 | -4.955 | -4.972 | -4.794 | -2.203 | -4.833 | -3.771 | -4.981 | -4.865 | 22240  | DPYSL3  | NM_001291455_18_-1 |
| Mdk      | -1.824 | -0.642 | -1.631 | -0.591 | 0.840  | 1.236  | -0.559 | -3.251 | -2.653 | -3.155 | 17242  | MDK     | NM_001291481_2_-1  |
| Mdk      | -3.638 | -4.495 | -4.308 | -4.955 | -4.861 | -4.885 | -3.972 | -4.589 | -4.093 | -4.231 | 17242  | MDK     | NM_001291482_2_-1  |
| Mdk      | -4.909 | -4.981 | -4.979 | -4.979 | -4.981 | -4.981 | -4.981 | -4.981 | -3.242 | -4.981 | 17242  | MDK     | NM_001291483_2_-1  |
| Birc2    | 2.470  | 3.695  | 3.815  | 2.994  | 4.939  | 4.390  | 4.184  | 2.914  | 1.166  | 1.227  | 11797  | BIRC2   | NM_001291503_9_-1  |
| Pbx1     | 0.661  | 0.902  | 4.808  | 3.792  | 0.473  | -3.203 | 2.272  | 0.673  | 2.075  | -4.039 | 18514  | PBX1    | NM_001291508_1_-1  |
| Pbx1     | 1.170  | -2.854 | 0.240  | -0.033 | -1.261 | -0.789 | 0.774  | -0.196 | 1.092  | 1.093  | 18514  | PBX1    | NM_001291509_1_-1  |
| Sema3b   | -4.981 | -4.776 | -4.978 | -4.974 | -4.981 | -4.981 | -4.981 | -4.979 | -4.952 | -4.981 | 20347  | SEMA3B  | NM_001291537_9_-1  |
| Sema3b   | -4.981 | -4.772 | -4.978 | -4.973 | -4.981 | -4.981 | -4.981 | -4.979 | -4.950 | -4.981 | 20347  | SEMA3B  | NM_001291538_9_-1  |
| Sema3b   | -4.981 | -4.126 | -4.962 | -4.888 | -4.974 | -4.924 | -4.977 | -4.904 | -4.772 | -4.981 | 20347  | SEMA3B  | NM_001291539_9_-1  |
| Xlr      | 1.504  | 2.329  | 3.165  | 3.903  | 0.173  | 0.706  | 1.885  | 1.221  | 1.305  | 1.731  | 22441  | NA      | NM_001291747_X_-1  |
| Xlr      | -2.633 | -1.923 | -0.618 | 0.320  | -2.158 | -1.507 | -4.283 | -2.660 | -2.147 | -4.089 | 22441  | NA      | NM_001291748_X_-1  |
| Tfdp1    | 4.775  | 4.690  | 4.961  | 5.181  | 5.086  | 4.831  | 4.561  | 4.825  | 5.106  | 5.078  | 21781  | TFDP1   | NM_001291765_8_+1  |
| Tfdp1    | 0.109  | -2.922 | -0.447 | -1.756 | 1.264  | -0.352 | -0.766 | -1.616 | 1.056  | 0.396  | 21781  | TFDP1   | NM_001291766_8_+1  |
| Tfdp1    | 1.644  | 2.093  | 1.760  | 1.281  | 1.270  | 1.051  | 0.939  | 2.301  | 2.175  | 1.944  | 21781  | TFDP1   | NM_001291768_8_+1  |
| Map2k7   | -3.679 | -3.050 | -3.665 | -4.712 | -4.574 | -4.507 | -3.230 | -4.291 | -3.874 | -2.829 | 26400  | MAP2K7  | NM_001291777_8_+1  |
| Map2k7   | -1.989 | -3.536 | -3.964 | -2.908 | -3.770 | -3.996 | -2.975 | -4.124 | -2.972 | -3.451 | 26400  | MAP2K7  | NM_001291778_8_+1  |
| Map2k7   | 4.084  | 3.571  | 2.936  | 3.594  | 3.475  | 3.244  | 2.941  | 2.887  | 3.451  | 3.404  | 26400  | MAP2K7  | NM_001291783_8_+1  |
| Map4k2   | 3.955  | 3.751  | 3.014  | 2.311  | 2.609  | 2.465  | 3.349  | 2.467  | 3.284  | 1.941  | 26412  | MAP4K2  | NM_001291787_19_+1 |
| Dok1     | 0.391  | 1.703  | 1.486  | 2.214  | 1.945  | 1.487  | 2.382  | 1.354  | 2.828  | 2.129  | 13448  | DOK1    | NM_001291799_6_-1  |
| Cdk19    | -1.192 | 3.078  | -1.202 | -0.460 | 1.227  | -2.531 | 0.227  | 1.154  | 1.875  | 2.475  | 78334  | CDK19   | NM_001291816_10_+1 |
| Cdk19    | 3.241  | -0.463 | 2.463  | 2.077  | 1.677  | 1.867  | 2.340  | 2.651  | 3.285  | 1.886  | 78334  | CDK19   | NM_001291817_10_+1 |
| Rhbdf1   | -3.738 | -0.220 | -3.789 | -4.345 | -3.824 | -3.453 | -0.552 | -3.733 | -1.423 | -3.711 | 13650  | RHBDF1  | NM_001291818_11_-1 |
| Alas1    | -4.767 | -4.594 | -4.857 | -2.377 | -2.133 | -3.019 | -2.783 | -3.379 | -4.829 | -0.926 | 11655  | ALAS1   | NM_001291835_9_-1  |
| Aebp1    | -4.981 | -4.981 | -4.445 | -4.886 | -4.984 | -4.883 | -4.801 | -4.959 | -4.981 | -4.981 | 11568  | AEBP1   | NM_001291857_11_+1 |
| Rhoc     | -3.396 | -3.324 | -3.650 | -2.187 | -3.234 | -3.502 | -4.137 | -4.606 | -4.978 | -4.372 | 11853  | RHOC    | NM_001291859_3_+1  |
| Sat1     | 6.372  | 6.534  | 6.882  | 6.585  | 8.319  | 8.958  | 7.787  | 7.971  | 7.242  | 7.911  | 20229  | SAT1    | NM_001291865_X_-1  |
| Adam17   | 0.406  | 2.351  | 2.462  | 2.321  | 1.995  | 2.845  | 2.013  | 2.566  | 2.522  | 2.894  | 11491  | ADAM17  | NM_001291871_12_-1 |
| Adam19   | -2.262 | -2.527 | -0.999 | -0.623 | -0.203 | -2.440 | -0.208 | 0.086  | 2.474  | 3.676  | 11492  | ADAM19  | NM_001291890_11_+1 |
| Adam19   | 4.785  | 5.031  | 5.842  | 5.310  | 4.107  | 4.797  | 2.764  | 3.373  | 0.683  | 1.751  | 11492  | ADAM19  | NM_001291891_11_+1 |
| Lilr4b   | -1.436 | -4.981 | 3.384  | 3.139  | -0.359 | 1.033  | 4.704  | 3.730  | 5.248  | 5.798  | 14727  | LILRB4  | NM_001291892_10_+1 |
| Lilr4b   | -0.133 | 0.389  | -1.099 | 0.388  | -0.130 | -0.108 | 2.594  | 0.880  | 0.336  | 0.391  | 14727  | LILRB4  | NM_001291893_10_+1 |
| Lilr4a   | 1.365  | 0.555  | 3.402  | 3.145  | 2.551  | 3.078  | 5.763  | 6.125  | 7.240  | 7.613  | 14728  | LILRB4  | NM_001291894_10_+1 |
| Adcy9    | 1.206  | 0.344  | -0.098 | -2.041 | -2.052 | -2.946 | -0.631 | -0.112 | 0.344  | -3.422 | 11515  | ADCY9   | NM_001291910_16_-1 |
| Adora1   | -4.981 | -4.981 | -4.016 | -3.408 | -2.952 | -3.068 | -3.254 | -3.608 | -2.259 | -2.850 | 11539  | ADORA1  | NM_001291928_1_-1  |
| Adora1   | -4.981 | -4.981 | -4.407 | -4.541 | -4.022 | -4.339 | -4.418 | -4.570 | -3.574 | -4.129 | 11539  | ADORA1  | NM_001291930_1_-1  |
| Zfp708   | -2.021 | -1.027 | -0.276 | -1.803 | -1.408 | -2.146 | -0.997 | -3.376 | -3.375 | -1.931 | 432769 | NA      | NM_001292066_13_-1 |
| Zfp799   | -1.155 | -1.216 | -0.369 | -1.535 | -0.552 | -1.538 | -1.075 | -1.762 | -2.694 | -1.136 | 240064 | ZNF799  | NM_001293229_17_-1 |
| Clasp1   | -3.673 | -3.310 | -4.048 | -4.382 | -3.463 | -4.792 | -1.852 | -2.389 | -1.142 | -1.264 | 76707  | CLASP1  | NM_001293300_1_+1  |
| Clasp1   | 2.717  | 2.688  | 5.349  | 5.220  | 4.768  | 4.453  | 3.924  | 4.014  | 4.283  | 4.354  | 76707  | CLASP1  | NM_001293301_1_+1  |
| Nme7     | 2.533  | 1.326  | 1.459  | 0.413  | 1.593  | 1.007  | 0.933  | -0.008 | 0.581  | 0.314  | 171567 | NME7    | NM_001293313_1_+1  |
| Cox4i1   | 7.883  | 7.970  | 7.528  | 7.448  | 6.704  | 7.020  | 7.371  | 6.954  | 6.516  | 6.558  | 12857  | COX4I1  | NM_001293559_8_+1  |
| Kyat3    | 0.395  | 2.109  | 3.155  | 3.963  | 1.962  | 2.745  | 1.778  | 2.841  | 1.038  | 1.553  | 229905 | KYAT3   | NM_001293560_3_+1  |
| Unc5c    | -4.981 | -4.981 | -4.981 | -4.981 | -4.537 | -4.644 | -4.980 | -4.969 | -4.981 | -4.981 | 22253  | UNC5C   | NM_001293561_3_+1  |
| Ganab    | 5.783  | 5.824  | 6.233  | 6.296  | 6.236  | 6.192  | 5.932  | 6.294  | 6.826  | 6.831  | 14376  | GANAB   | NM_001293621_19_+1 |
| Ppp3ca   | 5.565  | 5.529  | 5.911  | 5.829  | 5.574  | 5.717  | 6.151  | 6.326  | 6.892  | 7.019  | 19055  | PPP3CA  | NM_001293622_3_+1  |
| Hmgb3    | -4.766 | -3.901 | -1.991 | -3.093 | -4.919 | -2.328 | -2.810 | -0.869 | -4.776 | -4.949 | 15354  | NA      | NM_001293623_X_+1  |
| Hmgb3    | 0.669  | 0.425  | 2.249  | 4.131  | 2.978  | 4.023  | 2.817  | 4.381  | 2.857  | 1.978  | 15354  | NA      | NM_001293624_X_+1  |
| Hmgb3    | 0.113  | -0.627 | 0.163  | -0.417 | -1.756 | 0.052  | -3.343 | -0.651 | -1.512 | 0.226  | 15354  | NA      | NM_001293625_X_+1  |
| Slc37a4  | 2.355  | 1.159  | 2.675  | 2.084  | 2.735  | 2.438  | 2.921  | 2.212  | 3.535  | 3.067  | 14385  | SLC37A4 | NM_001293630_9_+1  |
| Slc37a4  | 3.078  | 3.290  | 2.162  | 2.433  | 2.523  | 2.641  | 2.729  | 3.122  | 3.877  | 3.259  | 14385  | SLC37A4 | NM_001293631_9_+1  |
| Ktn1     | 4.471  | 4.389  | 5.279  | 4.856  | 5.220  | 5.539  | 4.763  | 4.515  | 3.610  | 3.777  | 16709  | NA      | NM_001293635_14_+1 |
| Ktn1     | 3.305  | 3.559  | 3.160  | 3.330  | 3.140  | 3.759  | 3.398  | 3.171  | 2.459  | 2.872  | 16709  | NA      | NM_001293636_14_+1 |
| Nek1     | -4.123 | -3.732 | -4.462 | -1.234 | -3.273 | -3.899 | -4.441 | -1.747 | -0.635 | 0.626  | 18004  | NEK1    | NM_001293637_8_+1  |
| Nek1     | -1.928 | -2.316 | -3.876 | -4.407 | -4.045 | -3.694 | -3.521 | -4.421 | -3.462 | -4.312 | 18004  | NEK1    | NM_001293638_8_+1  |
| Nek1     | 4.038  | 2.214  | 2.463  | -0.281 | -0.197 | 0.136  | 1.038  | -0.171 | 1.003  | 0.137  | 18004  | NEK1    | NM_001293639_8_+1  |
| Ppa2     | 2.854  | 2.855  | 1.847  | 1.513  | 1.120  | 1.027  | 1.384  | 0.877  | 1.724  | 0.434  | 74776  | PPA2    | NM_001293641_3_+1  |
| Ccdc109b | -4.981 | -4.981 | -0.238 | -2.939 | -1.388 | -3.314 | 2.250  | 0.301  | 3.479  | 1.738  | 66815  | MCUB    | NM_001293644_3_-1  |
| Pip5k1c  | -3.066 | -2.713 | 1.293  | -1.460 | -1.579 | -2.043 | -1.440 | -1.654 | -0.681 | -4.306 | 18717  | PIP5K1C | NM_001293646_10_+1 |
| Pip5k1c  | 0.851  | 0.175  | 1.996  | 1.320  | -0.720 | 0.652  | -0.525 | -0.372 | 1.913  | 2.864  | 18717  | PIP5K1C | NM_001293647_10_+1 |
| Plcd1    | -4.981 | -4.981 | -4.572 | -3.406 | -4.651 | -3.362 | -2.536 | -4.825 | -0.814 | -2.560 | 18799  | PLCD1   | NM_001293648_9_-1  |
| PrkcsH   | 5.057  | 4.493  | 3.761  | 3.882  | 3.060  | 3.118  | 3.297  | 3.867  | 3.709  | 3.751  | 19089  | PRKCSH  | NM_001293650_9_+1  |
| PrkcsH   | 4.319  | 3.130  | 3.760  | 2.081  | 3.385  | 0.995  | 3.011  | 1.514  | 3.132  | 0.934  | 19089  | PRKCSH  | NM_001293651_9_+1  |
| Rab7     | 0.607  | 1.448  | 1.225  | 1.223  | 0.263  | 0.223  | 0.891  | 0.697  | 1.020  | 1.408  | 19349  | RAB7A   | NM_001293652_6_-1  |
| Rab7     | 3.941  | 4.341  | 3.565  | 3.719  | 2.124  | 2.573  | 3.014  | 2.232  | 1.543  | 3.941  | 19349  | RAB7A   | NM_001293653_6_-1  |
| Rab7     | 2.827  | 2.437  | 2.254  | 2.993  | 1.830  | 2.244  | 1.729  | 2.450  | 2.110  | 2.827  | 19349  | RAB7A   | NM_001293654_6_-1  |
| Rab7     | -0.494 | -0.241 | -0.921 | 0.111  | 1.463  | -1.795 | 0.237  | -2.905 | 0.483  | 1.062  | 19349  | RAB7A   | NM_001293655_6_-1  |
| Rbm3     | 8.337  | 8.089  | 7.827  | 7.691  | 7.897  | 7.637  | 7.755  | 7.286  | 7.068  | 6.709  | 19652  | RBM3    | NM_001293658_X_-1  |
| Uimc1    | 2.450  | 3.453  | 2.773  | 1.631  | 1.424  | 1.443  | 2.511  | 1.414  | 1.718  | 1.322  | 20184  | UIMC1   | NM_001293660_13_-1 |
| Naxd     | 2.218  | 2.410  | 0.543  | 1.039  | 1.827  | 1.230  | 1.356  | 0.046  | 1.709  | 1.001  | 69225  | NAXD    | NM_001293661_8_+1  |
| Camk2d   | -4.094 | -3.939 | -4.474 | -4.833 | -4.434 | -4.850 | -4.355 | -4.746 | -4.412 | -4.525 | 108058 | CAMK2D  | NM_001293663_3_+1  |
| Camk2d   | -1.175 | -3.700 | 0.558  | 0.517  | 0.387  | -0.764 | 0.491  | -0.846 | 1.686  | 2.256  | 108058 | CAMK2D  | NM_001293664_3_+1  |

|          |        |        |        |        |        |        |        |        |        |        |           |          |                    |
|----------|--------|--------|--------|--------|--------|--------|--------|--------|--------|--------|-----------|----------|--------------------|
| Camk2d   | -4.914 | -2.186 | -1.628 | -3.299 | -3.494 | -4.436 | -3.232 | -3.179 | -0.816 | -1.032 | 108058    | CAMK2D   | NM_001293665_3_+1  |
| Camk2d   | 0.889  | -0.352 | 0.233  | 0.916  | 0.638  | 1.469  | 0.852  | 1.839  | 2.646  | 2.232  | 108058    | CAMK2D   | NM_001293666_3_+1  |
| Atp11a   | -1.136 | 0.979  | 2.275  | 3.876  | 3.376  | 3.446  | 3.302  | 2.446  | 4.432  | 4.662  | 50770     | ATP11A   | NM_001293667_8_+1  |
| Atp11a   | -0.529 | -0.908 | 0.386  | 0.995  | 0.526  | -0.081 | -1.337 | -1.924 | -2.765 | 0.214  | 50770     | ATP11A   | NM_001293668_8_+1  |
| Ctbs     | 4.946  | 4.320  | 4.227  | 3.922  | 4.150  | 4.309  | 4.605  | 4.381  | 4.876  | 4.869  | 74245     | CTBS     | NM_001293672_3_+1  |
| Nptn     | -0.311 | -3.773 | -1.524 | -1.856 | -4.675 | -4.933 | -3.966 | -2.292 | -4.522 | -4.644 | 20320     | NA       | NM_001293673_9_+1  |
| Xlr4b    | 2.577  | 1.073  | -0.928 | 0.036  | 1.141  | 1.203  | 0.036  | -0.117 | 0.171  | 0.436  | 27083     | NA       | NM_001293676_X_+1  |
| Xlr4b    | 2.170  | 0.948  | -0.211 | 0.286  | 1.450  | 1.512  | -0.516 | 0.616  | 0.311  | -0.612 | 27083     | NA       | NM_001293677_X_+1  |
| Xlr4b    | 0.387  | 1.681  | 1.685  | -0.273 | 1.819  | 0.048  | -0.196 | -0.734 | 0.170  | -0.530 | 27083     | NA       | NM_001293678_X_+1  |
| Xlr4b    | 2.864  | 3.856  | 1.849  | 3.000  | 0.159  | 2.653  | 2.394  | 2.752  | 0.620  | 2.074  | 27083     | NA       | NM_001293679_X_+1  |
| Xlr4b    | 3.677  | 3.500  | 3.073  | 3.602  | 3.515  | 4.074  | 3.701  | 3.900  | 1.093  | 2.887  | 27083     | NA       | NM_001293680_X_+1  |
| Zwint    | 6.606  | 6.493  | 5.653  | 5.889  | 6.196  | 5.992  | 5.824  | 5.542  | 5.161  | 4.724  | 52696     | ZWINT    | NM_001293683_10_+1 |
| Zwint    | 3.501  | 3.837  | 2.463  | 2.865  | 2.810  | 2.844  | 2.887  | 2.571  | 2.175  | 2.135  | 52696     | ZWINT    | NM_001293684_10_+1 |
| Vti1a    | -4.981 | -4.981 | -2.775 | -3.081 | -3.754 | -3.158 | -3.528 | -4.831 | -4.575 | -4.822 | 53611     | VTI1A    | NM_001293685_19_+1 |
| Vti1a    | 2.268  | 2.301  | 2.458  | 2.846  | 2.459  | 3.207  | 3.551  | 2.632  | 3.064  | 2.664  | 53611     | VTI1A    | NM_001293686_19_+1 |
| Thsd1    | 0.367  | -0.864 | -2.724 | -2.205 | -0.669 | -2.874 | -1.670 | -2.884 | -0.258 | -0.515 | 56229     | THSD1    | NM_001293688_8_+1  |
| Ido1     | 1.921  | 1.080  | 1.450  | 0.789  | -2.917 | -1.216 | -3.575 | -3.689 | -1.352 | -0.585 | 15930     | IDO1     | NM_001293690_8_-1  |
| Adam32   | -4.981 | -4.981 | -4.012 | -4.498 | -3.882 | -4.955 | -4.956 | -4.933 | -3.022 | -4.899 | 353188    | ADAM32   | NM_001293693_8_-1  |
| Cept1    | 0.287  | 0.767  | 1.225  | -0.532 | 0.926  | 0.120  | 1.000  | -0.359 | 1.372  | 1.421  | 99712     | CEPT1    | NM_001293694_3_-1  |
| Polr3gl  | 3.857  | 5.136  | -0.205 | 0.827  | 0.628  | 0.352  | 0.509  | 1.748  | 1.350  | 2.409  | 69870     | POLR3GL  | NM_001293701_3_-1  |
| Plpp5    | 2.003  | 1.323  | 0.471  | 1.389  | -0.856 | -0.700 | -2.419 | 1.843  | 0.466  | 1.377  | 71910     | PLPP5    | NM_001293703_8_+1  |
| Pip5k1a  | 3.487  | 2.675  | 2.550  | 2.796  | 3.068  | 2.485  | 2.294  | 2.512  | 2.427  | 3.109  | 18720     | PIP5K1A  | NM_001293707_3_-1  |
| Pi4kb    | -0.160 | -2.702 | -0.584 | -1.412 | 1.284  | 1.033  | -3.131 | 0.255  | -4.241 | -4.582 | 107650    | PI4KB    | NM_001293715_3_+1  |
| Pi4kb    | 0.097  | 1.380  | -2.146 | -0.711 | -1.585 | 0.437  | -0.237 | -0.075 | 0.452  | 0.991  | 107650    | PI4KB    | NM_001293716_3_+1  |
| Cgn      | -4.981 | -4.981 | -4.961 | -3.274 | -4.716 | -3.616 | -3.653 | -3.732 | -4.981 | -4.981 | 70737     | CGN      | NM_001293727_3_-1  |
| Tuft1    | 0.021  | 1.171  | 1.027  | 0.994  | 1.234  | 0.285  | 1.203  | -0.016 | 0.605  | 0.632  | 22156     | TUFT1    | NM_001293728_3_-1  |
| Rorc     | -1.995 | -1.777 | -4.993 | -1.618 | -0.157 | 3.304  | -1.004 | 1.183  | -4.981 | -4.981 | 19885     | RORC     | NM_001293734_3_+1  |
| Rab13    | -1.143 | -0.239 | -2.638 | -4.831 | -3.364 | -2.420 | -2.947 | -2.362 | -4.885 | -4.819 | 68328     | RAB13    | NM_001293741_3_+1  |
| Tpm3     | 1.406  | 2.189  | 2.418  | 2.732  | 2.339  | 2.730  | 1.624  | 2.211  | 1.626  | 2.205  | 59069     | TPM3     | NM_001293748_3_+1  |
| Tpm3     | -0.371 | -4.981 | 0.824  | 1.618  | 0.583  | 2.060  | 0.455  | 0.823  | -0.255 | 1.368  | 59069     | TPM3     | NM_001293749_3_+1  |
| Dctn6    | 5.281  | 1.999  | 1.870  | -1.463 | 2.394  | -2.463 | 1.443  | -3.549 | 1.361  | -4.981 | 22428     | DCTN6    | NM_001293757_8_-1  |
| Dctn6    | 8.456  | 8.487  | 4.609  | 4.736  | 4.167  | 4.180  | 4.156  | 4.049  | 3.090  | 2.504  | 22428     | DCTN6    | NM_001293758_8_-1  |
| Dctn6    | 4.377  | 1.265  | 1.341  | -2.206 | 1.927  | -1.570 | 1.515  | -2.687 | 0.659  | -3.005 | 22428     | DCTN6    | NM_001293759_8_-1  |
| Pygo2    | -3.838 | -0.413 | -1.776 | -1.457 | -0.673 | -0.557 | -2.012 | -2.908 | -1.078 | -0.096 | 68911     | PYGO2    | NM_001293763_3_+1  |
| Pygo2    | 3.075  | 2.719  | 4.483  | 4.447  | 3.253  | 3.722  | 3.627  | 3.713  | 4.391  | 4.616  | 68911     | PYGO2    | NM_001293766_3_+1  |
| Pygo2    | 3.273  | 3.485  | 5.065  | 4.981  | 3.963  | 4.114  | 4.251  | 4.277  | 5.177  | 5.131  | 68911     | PYGO2    | NM_001293767_3_+1  |
| Pygo2    | 1.007  | 0.335  | 2.718  | 2.136  | 1.753  | 1.197  | 1.581  | 2.385  | 3.917  | 3.338  | 68911     | PYGO2    | NM_001293768_3_+1  |
| Mfap3l   | -1.894 | -2.265 | -4.942 | -4.965 | -4.294 | -2.914 | -1.777 | -2.779 | -0.327 | -4.329 | 71306     | MFAP3L   | NM_001293769_8_+1  |
| Palld    | -4.981 | -4.981 | -4.956 | -2.846 | -4.837 | -4.946 | -4.940 | -4.961 | -3.752 | -4.981 | 72333     | PALLD    | NM_001293772_8_-1  |
| Palld    | -4.981 | -4.981 | -4.981 | -4.981 | -4.116 | -4.014 | -4.981 | -4.981 | -4.981 | -4.981 | 72333     | PALLD    | NM_001293773_8_-1  |
| Palld    | 1.587  | 1.728  | 1.954  | 2.942  | 0.740  | -0.639 | 1.994  | 2.418  | 1.169  | 1.791  | 72333     | PALLD    | NM_001293774_8_-1  |
| Chtop    | 4.415  | 4.255  | 3.803  | 3.908  | 3.934  | 3.834  | 3.601  | 3.033  | 3.090  | 2.168  | 66511     | NA       | NM_001293776_3_-1  |
| Chtop    | 5.279  | 4.963  | 4.186  | 4.130  | 4.363  | 3.905  | 4.013  | 3.711  | 3.118  | 2.840  | 66511     | NA       | NM_001293777_3_-1  |
| Chtop    | 1.628  | -1.725 | -2.259 | -2.343 | -1.823 | -2.990 | -1.636 | -4.083 | -3.729 | -3.687 | 66511     | NA       | NM_001293778_3_-1  |
| Chtop    | -3.613 | -3.593 | -3.781 | -4.326 | -3.260 | -4.599 | -3.652 | -4.598 | -4.112 | -4.565 | 66511     | NA       | NM_001293779_3_-1  |
| Chtop    | 2.928  | 2.399  | 0.521  | 1.425  | 0.805  | 0.767  | 1.704  | -0.123 | -0.159 | 1.880  | 66511     | NA       | NM_001293780_3_-1  |
| Chtop    | 4.305  | 4.661  | 3.486  | 3.465  | 4.090  | 4.060  | 3.836  | 3.824  | 4.202  | 4.366  | 66511     | NA       | NM_001293781_3_-1  |
| Chtop    | -3.288 | -3.064 | -0.116 | 0.362  | -1.026 | -4.769 | -2.063 | -1.231 | 0.668  | 0.809  | 66511     | NA       | NM_001293782_3_-1  |
| Ddx60    | 0.074  | 1.808  | 0.575  | -0.433 | 4.717  | 4.075  | 3.899  | 3.048  | 4.190  | 3.183  | 234311    | DDX60    | NM_001293783_8_+1  |
| March1   | -0.089 | 0.119  | 1.907  | 2.023  | 0.691  | 1.048  | 0.939  | 0.903  | 1.745  | 1.915  | 72925     | MARCH1   | NM_001293784_8_+1  |
| Ints10   | 0.885  | 1.639  | -1.246 | -1.037 | 0.103  | 0.407  | -0.250 | 0.445  | 1.422  | 1.490  | 70885     | INTS10   | NM_001293791_8_+1  |
| Ints10   | -1.072 | -1.895 | -0.791 | -0.480 | -0.651 | 0.266  | -0.320 | -0.906 | -1.827 | -0.424 | 70885     | INTS10   | NM_001293792_8_+1  |
| Tm6sf2   | -4.981 | -0.841 | -3.628 | -4.442 | -3.649 | -3.992 | -3.986 | -4.741 | -4.981 | -4.981 | 107770    | TM6SF2   | NM_001293795_8_+1  |
| Tmem161a | 3.788  | 4.138  | 2.987  | 3.435  | 3.049  | 2.511  | 2.917  | 3.206  | 3.702  | 3.155  | 234371    | TMEM161A | NM_001293797_8_+1  |
| Ocel1    | 4.024  | 3.622  | 1.513  | 1.597  | 1.622  | 1.320  | 1.863  | 1.629  | 2.000  | 1.506  | 77090     | OCEL1    | NM_001293800_8_+1  |
| Arfip1   | 2.063  | 2.200  | 2.585  | 1.801  | 2.455  | 1.872  | 2.724  | 1.660  | 3.371  | 2.648  | 99889     | ARFIP1   | NM_001293801_3_-1  |
| Cflar    | 4.097  | 3.983  | 4.399  | 4.508  | 5.169  | 5.044  | 4.917  | 4.620  | 4.312  | 4.742  | 12633     | CFLAR    | NM_001293804_1_+1  |
| Cflar    | 1.935  | 2.281  | 2.104  | 2.363  | 2.827  | 2.993  | 3.192  | 2.848  | 1.935  | 2.233  | 12633     | CFLAR    | NM_001293805_1_+1  |
| Pex1     | 2.733  | 3.475  | 2.691  | 2.305  | 2.887  | 2.808  | 2.853  | 2.418  | 3.340  | 3.417  | 71382     | PEX1     | NM_001293806_5_+1  |
| Gk       | -3.784 | -4.120 | -1.496 | -4.889 | -4.683 | -4.592 | -1.311 | -2.535 | -0.588 | -0.762 | 14933     | NA       | NM_001294138_X_-1  |
| Gk       | -2.323 | -1.387 | -1.290 | -1.293 | 0.074  | -1.211 | 0.745  | -0.263 | -4.373 | 0.757  | 14933     | NA       | NM_001294140_X_-1  |
| Hipk2    | 1.658  | 2.681  | 4.074  | 3.545  | 3.008  | 1.573  | 2.712  | 1.487  | 2.542  | 2.663  | 15258     | HIPK2    | NM_001294143_6_-1  |
| Hipk2    | 0.866  | 1.989  | 1.154  | -0.119 | 0.340  | -0.058 | 0.063  | 1.280  | 2.144  | 1.037  | 15258     | HIPK2    | NM_001294144_6_-1  |
| Kif1a    | -3.015 | -2.795 | -2.355 | -2.707 | -3.587 | -4.046 | -3.721 | -4.366 | -4.981 | -2.543 | 16560     | KIF1A    | NM_001294149_1_-1  |
| Kif1a    | -0.563 | -1.653 | 1.076  | -1.046 | -2.682 | -0.898 | -2.040 | -1.439 | -4.981 | -4.690 | 16560     | KIF1A    | NM_001294150_1_-1  |
| Il1rl1   | -4.981 | -4.981 | -4.955 | -3.218 | -4.978 | -3.853 | -1.312 | -0.356 | -2.922 | -3.386 | 17082     | IL1RL1   | NM_001294171_1_+1  |
| Dda1     | 1.955  | 1.175  | 0.260  | -0.216 | 1.013  | -0.010 | 0.592  | 0.467  | 1.704  | 1.350  | 66498     | DDA1     | NM_001294258_8_+1  |
| Dda1     | -3.776 | -3.072 | -2.244 | -4.404 | -4.264 | -2.713 | -3.607 | -4.315 | -0.710 | -2.812 | 66498     | DDA1     | NM_001294259_8_+1  |
| Agbl5    | -0.944 | 0.119  | -0.950 | -0.707 | -0.371 | -1.286 | -0.851 | -1.308 | -0.910 | -0.952 | 231093    | AGBL5    | NM_001294262_5_+1  |
| Pgl5     | 4.774  | 4.592  | 2.277  | 2.172  | 2.125  | 1.992  | 1.838  | 1.935  | 2.151  | 1.730  | 66171     | PGL5     | NM_001294269_8_+1  |
| Cmc4     | 4.133  | 3.742  | 2.683  | 2.123  | 2.816  | 2.560  | 2.866  | 2.663  | 1.764  | 1.802  | 105886298 | NA       | NM_001294277_X_-1  |
| Zfp827   | -3.408 | -0.951 | -4.944 | -1.884 | -3.307 | -1.022 | -3.690 | -4.343 | -4.569 | -2.821 | 622675    | ZNF827   | NM_001294279_8_+1  |
| Timp1    | -4.981 | -4.981 | -4.206 | -4.949 | -4.988 | -4.944 | -4.415 | -4.115 | -3.738 | -3.882 | 21857     | TIMP1    | NM_001294280_X_+1  |
| Ccdc130  | 2.948  | 3.059  | 2.010  | 1.819  | 2.064  | 1.672  | 1.908  | 1.600  | 2.424  | 1.785  | 67736     | CCDC130  | NM_001294281_8_-1  |

|         |        |        |        |        |        |        |        |        |        |        |           |         |                    |
|---------|--------|--------|--------|--------|--------|--------|--------|--------|--------|--------|-----------|---------|--------------------|
| Preb    | 1.900  | 1.635  | 2.402  | 2.290  | 1.383  | 1.533  | 1.729  | 1.609  | 1.319  | 1.773  | 50907     | PREB    | NM_001294302_5_-1  |
| Mpv17   | 1.047  | 1.838  | -1.173 | -0.706 | -0.398 | -0.579 | -1.394 | -0.524 | -2.537 | -2.676 | 17527     | MPV17   | NM_001294322_5_-1  |
| Zfp2    | -1.740 | -1.578 | -4.930 | -2.826 | -4.086 | -3.963 | -3.916 | -1.628 | -4.792 | -1.063 | 22678     | ZFP2    | NM_001294323_11_-1 |
| Mpv17   | 1.764  | 0.040  | -3.211 | -0.047 | -3.879 | -2.771 | -1.147 | -4.553 | -3.577 | -4.099 | 17527     | MPV17   | NM_001294324_5_-1  |
| Tlk2    | -4.018 | 2.119  | -0.972 | -3.652 | -0.529 | -0.382 | -1.389 | -2.808 | -4.091 | -1.356 | 24086     | TLK2    | NM_001294329_11_+1 |
| Tlk2    | -0.863 | -2.259 | -1.530 | -1.166 | -1.813 | -2.257 | 0.875  | -1.357 | 1.449  | -1.853 | 24086     | TLK2    | NM_001294330_11_+1 |
| Tlk2    | 1.036  | 0.868  | -1.924 | -0.149 | 1.275  | 0.080  | -0.635 | -0.818 | 0.670  | 1.156  | 24086     | TLK2    | NM_001294331_11_+1 |
| Tlk2    | 1.247  | 2.399  | 2.198  | 2.063  | 2.571  | 2.262  | 1.879  | 1.234  | 2.230  | 2.608  | 24086     | TLK2    | NM_001294334_11_+1 |
| Inpp4b  | -1.804 | -2.010 | -1.137 | -0.148 | 0.851  | 0.653  | 0.377  | 1.595  | -4.611 | -3.226 | 234515    | INPP4B  | NM_001297591_8_+1  |
| Inpp4b  | 1.540  | 2.589  | -1.390 | 1.263  | 2.527  | 1.759  | 1.505  | 2.724  | 0.776  | 2.233  | 234515    | INPP4B  | NM_001297593_8_+1  |
| Inpp4b  | 1.466  | 3.404  | -0.384 | 0.598  | 0.300  | 1.720  | 2.455  | 0.865  | 0.409  | 1.709  | 234515    | INPP4B  | NM_001297596_8_+1  |
| Nfix    | -2.586 | -4.981 | -1.152 | -0.905 | -0.380 | -1.022 | -0.330 | -1.157 | 0.681  | 0.308  | 18032     | NFIX    | NM_001297601_8_-1  |
| Rad23a  | 4.705  | 4.229  | 4.711  | 4.335  | 4.929  | 4.274  | 4.390  | 4.139  | 4.617  | 3.906  | 19358     | RAD23A  | NM_001297606_8_-1  |
| Rad23a  | -2.219 | -1.817 | -0.916 | -0.546 | -1.448 | -0.793 | -1.072 | -1.811 | -2.201 | -0.706 | 19358     | RAD23A  | NM_001297607_8_-1  |
| Mylk3   | -4.981 | -0.879 | -4.201 | -1.511 | -1.622 | 0.292  | -2.456 | 0.188  | -2.753 | -0.177 | 213435    | MYLK3   | NM_001297612_8_-1  |
| Btg3    | 5.489  | 2.631  | 1.865  | -3.651 | 1.454  | -2.192 | 2.625  | 0.585  | -0.552 | -1.581 | 12228     | BTG3    | NM_001297747_16_-1 |
| Btg3    | 2.602  | 5.764  | 0.277  | 3.013  | 1.151  | 3.132  | -0.561 | 3.338  | 2.341  | 2.237  | 12228     | BTG3    | NM_001297747_17_+1 |
| Poglut1 | 2.727  | 2.705  | 5.481  | 5.445  | 3.905  | 3.546  | 3.906  | 3.749  | 4.319  | 4.082  | 224143    | POGLUT1 | NM_001300827_16_-1 |
| Agap2   | 1.287  | 1.088  | 1.271  | 0.844  | 1.240  | 1.740  | 1.016  | 0.653  | 0.594  | 0.168  | 216439    | AGAP2   | NM_001301014_10_+1 |
| Oaz1    | 4.836  | 4.724  | 4.099  | 4.087  | 3.587  | 3.757  | 3.445  | 3.652  | 2.944  | 2.525  | 18245     | OAZ1    | NM_001301034_10_+1 |
| Cap1    | 4.312  | 5.679  | 4.944  | 7.060  | 4.948  | 7.050  | 4.705  | 7.235  | 5.811  | 8.327  | 12331     | CAP1    | NM_001301067_4_-1  |
| Olr1    | -4.089 | -3.838 | -2.568 | -3.016 | -4.956 | -4.921 | -4.180 | -2.663 | -2.935 | -4.963 | 108078    | OLR1    | NM_001301094_6_-1  |
| Olr1    | -1.244 | -1.757 | -0.432 | -1.716 | -4.322 | -3.524 | -1.293 | -3.465 | 0.308  | -4.970 | 108078    | OLR1    | NM_001301096_6_-1  |
| Edc4    | 3.542  | 3.827  | 3.825  | 4.179  | 4.530  | 3.980  | 3.996  | 4.416  | 5.527  | 5.306  | 234699    | EDC4    | NM_001301100_8_+1  |
| Cast    | 2.591  | 2.564  | 3.348  | 2.905  | 2.665  | 1.514  | 3.376  | 3.201  | 4.761  | 4.604  | 12380     | CAST    | NM_001301153_13_-1 |
| Cast    | 2.871  | -0.105 | 1.501  | 2.019  | 0.599  | 1.838  | 2.007  | 2.266  | 3.750  | 3.755  | 12380     | CAST    | NM_001301155_13_-1 |
| Cast    | 2.682  | 0.712  | 2.231  | 3.638  | 3.293  | 4.021  | 3.497  | 3.453  | 0.657  | 1.219  | 12380     | CAST    | NM_001301156_13_-1 |
| Cast    | 1.319  | 0.717  | 0.854  | -4.379 | 1.033  | 0.347  | 0.101  | 0.258  | 1.176  | 0.672  | 12380     | CAST    | NM_001301157_13_-1 |
| Cast    | -3.896 | 0.937  | -4.787 | -2.695 | -4.935 | -4.952 | -1.516 | -4.850 | -1.307 | -4.334 | 12380     | CAST    | NM_001301158_13_-1 |
| Cast    | -4.768 | -3.201 | -4.963 | -4.920 | -4.906 | -4.973 | -4.863 | -4.973 | -4.822 | -4.832 | 12380     | CAST    | NM_001301160_13_-1 |
| Car7    | -4.981 | -3.315 | -2.342 | -2.540 | -0.167 | -0.392 | -0.175 | -2.057 | -0.423 | -0.119 | 12354     | CA7     | NM_001301164_8_+1  |
| Car7    | -3.474 | -4.981 | -3.447 | -4.971 | -1.462 | -4.520 | -4.685 | -4.447 | -2.155 | -4.981 | 12354     | CA7     | NM_001301165_8_+1  |
| Kctd19  | -4.981 | -4.981 | -2.191 | -1.078 | -2.834 | -4.214 | -2.691 | -3.859 | -4.981 | -4.981 | 279499    | KCTD19  | NM_001301173_8_-1  |
| Nrn1l   | -3.858 | -3.453 | -0.045 | -4.546 | -3.151 | -4.129 | -3.904 | -4.040 | -4.981 | -3.428 | 234700    | NRN1L   | NM_001301174_8_+1  |
| Dus2    | 1.677  | 2.452  | 4.067  | 0.954  | 2.048  | 1.968  | 1.715  | 1.025  | 0.297  | 0.683  | 66369     | DUS2    | NM_001301176_8_+1  |
| Cast    | -4.819 | -3.628 | -4.967 | -4.941 | -4.933 | -4.975 | -4.903 | -4.975 | -4.755 | -4.885 | 12380     | CAST    | NM_001301181_13_-1 |
| Dpep2   | -2.842 | -2.060 | 4.529  | 4.086  | 2.426  | 1.913  | 5.754  | 5.461  | 6.446  | 5.859  | 319446    | DPEP2   | NM_001301204_8_-1  |
| Dpep2   | -1.576 | -1.264 | 3.088  | 2.506  | 1.140  | -0.619 | 2.892  | 2.592  | 3.440  | 2.660  | 319446    | DPEP2   | NM_001301205_8_-1  |
| Ap1g1   | 4.889  | 4.645  | 5.602  | 5.648  | 5.527  | 5.575  | 5.536  | 5.179  | 5.862  | 6.147  | 11765     | AP1G1   | NM_001301211_8_+1  |
| Rab27a  | 0.960  | 1.231  | -0.193 | 0.370  | 0.791  | 0.789  | 0.518  | 0.992  | 2.134  | 3.239  | 11891     | RAB27A  | NM_001301230_9_+1  |
| Rab27a  | -4.440 | -4.328 | -4.859 | -4.916 | -4.801 | -4.949 | -4.090 | -2.921 | -1.001 | -4.793 | 11891     | RAB27A  | NM_001301232_9_+1  |
| Capn5   | 3.573  | 3.303  | -4.438 | -1.243 | -3.581 | -1.597 | -0.121 | 0.673  | -0.807 | -0.357 | 12337     | CAPN5   | NM_001301250_7_-1  |
| Gm38666 | -4.981 | -4.152 | -4.974 | -4.871 | -4.979 | -4.979 | -4.978 | -4.917 | -4.981 | -4.981 | 103611158 | NA      | NM_001301256_18_+1 |
| Gm38667 | -4.981 | -4.030 | -4.973 | -4.842 | -4.979 | -4.979 | -4.977 | -4.890 | -4.981 | -4.981 | 103611159 | NA      | NM_001301259_18_+1 |
| Inafm2  | 6.278  | 6.481  | 4.505  | 4.832  | 4.869  | 5.058  | 4.790  | 5.097  | 5.141  | 5.729  | 100043272 | NA      | NM_001301269_2_+1  |
| Agtrap  | 1.370  | 0.776  | -1.648 | -2.872 | -2.100 | -1.098 | -2.635 | -4.858 | 1.053  | -1.227 | 11610     | AGTRAP  | NM_001301281_4_-1  |
| Ctf1    | -4.981 | -4.981 | -4.955 | -4.823 | -4.975 | -4.957 | -4.836 | -4.944 | -4.826 | -4.611 | 13019     | CTF1    | NM_001301282_7_+1  |
| Ctf1    | -4.981 | -4.981 | -4.948 | -4.806 | -4.975 | -4.953 | -4.826 | -4.941 | -4.809 | -4.583 | 13019     | CTF1    | NM_001301283_7_+1  |
| Cyba    | 3.877  | 3.639  | 2.770  | 2.720  | 3.463  | 3.230  | 4.173  | 3.390  | 3.673  | 2.774  | 13057     | CYBA    | NM_001301284_8_-1  |
| Gab1    | -4.086 | -4.981 | -4.884 | -4.694 | -4.790 | -4.867 | -3.761 | -1.773 | -4.353 | 2.342  | 14388     | GAB1    | NM_001301298_8_-1  |
| Arhgdib | 6.909  | 6.592  | 4.185  | 4.182  | 6.183  | 6.013  | 6.537  | 6.558  | 7.329  | 6.930  | 11857     | ARHGDIB | NM_001301301_6_-1  |
| Arhgdib | 2.331  | -2.599 | 5.831  | 0.165  | 2.684  | 0.217  | 3.601  | -0.511 | 2.838  | -3.649 | 11857     | ARHGDIB | NM_001301303_6_-1  |
| Hipk1   | 5.457  | 5.125  | 4.769  | 4.664  | 5.005  | 5.203  | 5.784  | 4.709  | 5.626  | 6.116  | 15257     | HIPK1   | NM_001301304_3_-1  |
| Arhgdib | 8.079  | 6.670  | 7.844  | 6.996  | 8.226  | 7.836  | 8.273  | 8.074  | 8.537  | 8.009  | 11857     | ARHGDIB | NM_001301305_6_-1  |
| Hipk1   | 1.594  | 1.753  | -0.553 | 0.196  | 1.256  | -0.408 | 1.439  | 1.232  | 1.033  | -0.683 | 15257     | HIPK1   | NM_001301306_3_-1  |
| Oaz2    | 1.286  | -3.530 | 1.298  | 1.058  | -0.838 | -1.002 | 0.603  | 1.277  | 2.019  | 1.555  | 18247     | OAZ2    | NM_001301307_9_+1  |
| Arhgdib | 2.917  | -4.527 | 0.338  | -4.883 | 1.495  | -4.843 | 3.265  | -4.700 | 3.545  | -2.289 | 11857     | ARHGDIB | NM_001301308_6_-1  |
| Arhgdib | 2.927  | -4.435 | -1.248 | -4.899 | 1.691  | -3.582 | 2.384  | -4.761 | 3.246  | -4.853 | 11857     | ARHGDIB | NM_001301309_6_-1  |
| Wapl    | 4.794  | 4.141  | 4.814  | 5.132  | 4.744  | 4.925  | 4.501  | 4.020  | 4.148  | 4.704  | 218914    | WAPL    | NM_001301330_14_+1 |
| Gdnf    | -4.981 | -4.981 | -4.981 | -4.981 | -4.981 | -4.981 | -4.978 | -3.798 | -4.981 | -4.981 | 14573     | GDNF    | NM_001301332_15_+1 |
| Gdnf    | -4.981 | -4.981 | -4.977 | -4.965 | -4.981 | -4.981 | -4.938 | -4.971 | -4.981 | -4.981 | 14573     | GDNF    | NM_001301333_15_+1 |
| Hnrnpk  | 8.649  | 8.864  | 8.872  | 8.975  | 8.807  | 8.795  | 8.755  | 8.931  | 8.990  | 9.206  | 15387     | HNRNPK  | NM_001301340_13_-1 |
| Hnrnpk  | 0.910  | 2.252  | 0.935  | 1.294  | 0.513  | 1.110  | 0.916  | 1.527  | 0.986  | 0.267  | 15387     | HNRNPK  | NM_001301341_13_-1 |
| Hnrnpk  | 6.300  | 6.216  | 6.869  | 6.871  | 6.637  | 6.668  | 6.574  | 6.675  | 6.338  | 6.317  | 15387     | HNRNPK  | NM_001301343_13_-1 |
| Hnrnpk  | 4.439  | 4.532  | 4.221  | 4.075  | 4.132  | 3.644  | 3.898  | 4.183  | 3.580  | 4.109  | 15387     | HNRNPK  | NM_001301344_13_-1 |
| Hnrnpk  | 3.259  | 3.247  | 3.129  | 2.990  | 3.159  | 2.634  | 2.795  | 3.069  | 2.507  | 2.855  | 15387     | HNRNPK  | NM_001301345_13_-1 |
| Caprin2 | -1.378 | 0.503  | -0.516 | -0.382 | -1.718 | -0.480 | -0.836 | -1.893 | -4.277 | -2.430 | 232560    | CAPRIN2 | NM_001301351_6_-1  |
| Apod    | 2.615  | 0.944  | 0.906  | -0.445 | -4.720 | -4.781 | -2.727 | -3.178 | -2.618 | -4.526 | 11815     | APOD    | NM_001301353_16_-1 |
| Apod    | 1.118  | -4.529 | -1.287 | -3.171 | -3.681 | -4.831 | -3.313 | -2.888 | -1.914 | -2.708 | 11815     | APOD    | NM_001301354_16_-1 |
| Gdnf    | -4.981 | -4.981 | -4.275 | -4.221 | -4.981 | -4.981 | -2.735 | -3.140 | -4.981 | -4.981 | 14573     | GDNF    | NM_001301357_15_+1 |
| Hdlbp   | 5.655  | 5.170  | 5.779  | 5.932  | 5.805  | 5.828  | 5.697  | 5.909  | 6.740  | 6.885  | 110611    | HDLBP   | NM_001301364_1_-1  |
| Hsdl2   | -4.018 | -3.602 | -4.376 | -4.686 | -2.172 | -3.549 | -4.342 | -4.886 | -4.364 | -4.708 | 72479     | NA      | NM_001301367_4_+1  |
| Cdkn2c  | 1.360  | 2.502  | 2.143  | 2.272  | 3.109  | 2.401  | 2.374  | 2.054  | 1.731  | 1.568  | 12580     | CDKN2C  | NM_001301368_4_-1  |
| Syt14   | -4.981 | -2.974 | -4.666 | -4.494 | -4.714 | -4.914 | -4.816 | -4.895 | -4.981 | -4.596 | 329324    | SYT14   | NM_001301370_1_-1  |

|          |        |        |        |        |        |        |        |        |        |        |        |          |                    |
|----------|--------|--------|--------|--------|--------|--------|--------|--------|--------|--------|--------|----------|--------------------|
| Fst      | -4.981 | -4.981 | -4.957 | -4.461 | -4.980 | -4.980 | -4.981 | -4.981 | -4.981 | -2.969 | 14313  | FST      | NM_001301373_13_-1 |
| Coro1a   | 5.249  | 4.836  | 5.211  | 5.141  | 4.516  | 4.406  | 4.286  | 4.303  | 4.805  | 4.727  | 12721  | CORO1A   | NM_001301374_7_-1  |
| Fst      | -4.981 | -4.981 | -4.981 | -4.981 | -4.978 | -4.923 | -4.981 | -4.981 | -4.981 | -4.966 | 14313  | FST      | NM_001301375_13_-1 |
| Pir      | 4.584  | 5.756  | -2.962 | -1.944 | -3.418 | -3.012 | -3.370 | -2.958 | -1.035 | -1.587 | 69656  | PIR      | NM_001301402_X_+1  |
| Tspan33  | -1.182 | 0.022  | 4.562  | 5.140  | 3.434  | 3.700  | 4.205  | 3.834  | 1.879  | 0.997  | 232670 | TSPAN33  | NM_001301407_6_+1  |
| Smc2     | 3.522  | 2.893  | 4.519  | 4.221  | 5.265  | 5.193  | 4.858  | 4.201  | 2.509  | 2.581  | 14211  | SMC2     | NM_001301412_4_+1  |
| Usp1     | 4.896  | 5.058  | 5.228  | 4.938  | 5.675  | 5.367  | 5.541  | 5.097  | 5.499  | 5.315  | 230484 | USP1     | NM_001301414_4_+1  |
| Slc7a1   | -1.911 | -1.598 | -0.636 | -3.744 | -3.866 | -4.044 | -0.220 | -2.015 | -2.566 | 0.532  | 11987  | SLC7A1   | NM_001301424_5_-1  |
| Usp15    | 3.121  | 4.756  | 4.191  | 4.745  | 4.249  | 4.396  | 4.323  | 4.834  | 4.179  | 4.838  | 14479  | USP15    | NM_001301628_10_-1 |
| Scamp5   | -4.773 | -4.480 | -3.317 | -4.663 | -4.829 | -3.838 | -1.944 | -1.129 | -4.921 | -4.723 | 56807  | SCAMP5   | NM_001301634_9_-1  |
| Scamp5   | -1.145 | -1.461 | -3.029 | -1.158 | -1.179 | -2.261 | -2.048 | -0.025 | -3.448 | -0.272 | 56807  | SCAMP5   | NM_001301635_9_-1  |
| Xiap     | -3.688 | 1.742  | 2.408  | 2.032  | 1.119  | 1.705  | 1.001  | 0.507  | 1.516  | 2.126  | 11798  | XIAP     | NM_001301639_X_+1  |
| Xiap     | 3.618  | 1.088  | 2.936  | 1.715  | 2.977  | 3.421  | 2.337  | 2.935  | 2.456  | 3.115  | 11798  | XIAP     | NM_001301641_X_+1  |
| Pitpnb   | 5.348  | 5.484  | 4.705  | 4.736  | 4.125  | 4.413  | 4.449  | 4.531  | 5.094  | 5.114  | 56305  | PITPNB   | NM_001301643_5_+1  |
| Pitpnb   | 2.772  | 3.241  | 1.686  | 1.980  | 2.272  | 1.752  | 1.846  | 1.603  | 1.969  | 1.610  | 56305  | PITPNB   | NM_001301644_5_+1  |
| Aup1     | -0.108 | 0.131  | -1.501 | -0.670 | -0.068 | -0.682 | -0.941 | 0.211  | -0.102 | -0.189 | 11993  | AUP1     | NM_001301649_6_+1  |
| R3hcc1   | 2.363  | 3.021  | 1.241  | 0.769  | 1.692  | 1.868  | 0.848  | 1.588  | 1.491  | 0.544  | 71843  | NA       | NM_001301651_14_-1 |
| R3hcc1   | 2.106  | 2.445  | 2.043  | 1.706  | 1.582  | 1.376  | 1.596  | 1.115  | 1.638  | 1.332  | 71843  | NA       | NM_001301652_14_-1 |
| Pitpnb   | -4.525 | -4.130 | -4.739 | -2.353 | -4.032 | -2.893 | -4.684 | -3.828 | -4.631 | -1.150 | 56305  | PITPNB   | NM_001301666_5_+1  |
| Sumo3    | 4.434  | 4.813  | 5.743  | 5.923  | 4.653  | 4.895  | 4.639  | 4.741  | 3.189  | 4.049  | 20610  | SUMO3    | NM_001301671_10_+1 |
| Sumo3    | 0.669  | -4.556 | -0.403 | -0.759 | -1.427 | -2.026 | -2.156 | -2.205 | -1.017 | -0.302 | 20610  | SUMO3    | NM_001301672_10_+1 |
| Sumo3    | 2.386  | 2.118  | 2.639  | 2.265  | 1.539  | -0.278 | 1.230  | 0.704  | 0.639  | 1.633  | 20610  | SUMO3    | NM_001301673_10_+1 |
| Tfap2a   | -4.842 | -4.702 | -4.924 | -4.946 | -4.952 | -4.967 | -4.919 | -4.969 | -4.950 | -4.945 | 21418  | TFAP2A   | NM_001301674_13_-1 |
| Azin1    | 2.284  | 2.998  | 2.305  | 2.223  | 2.629  | 2.628  | 2.275  | 3.194  | 2.527  | 3.514  | 54375  | AZIN1    | NM_001301688_15_-1 |
| Cep63    | 5.068  | 4.083  | 5.099  | 4.308  | 6.876  | 4.708  | 5.607  | 4.149  | 4.462  | 3.937  | 28135  | CEP63    | NM_001301689_9_-1  |
| Adamtsl4 | -3.526 | -3.323 | -2.496 | -1.647 | -0.490 | -0.809 | -1.583 | -0.583 | -0.537 | 0.583  | 229595 | ADAMTSL4 | NM_001301705_3_-1  |
| Mpdu1    | -0.691 | -2.051 | -1.830 | -3.114 | -1.973 | -2.941 | -4.204 | -2.983 | -2.883 | -1.880 | 24070  | MPDU1    | NM_001301710_11_-1 |
| Mpdu1    | 1.844  | 1.969  | 1.156  | 1.401  | 1.839  | 0.935  | 1.744  | 1.754  | 1.515  | 1.528  | 24070  | MPDU1    | NM_001301711_11_-1 |
| Ccr7     | 2.165  | -3.604 | 4.579  | 5.128  | 5.872  | 5.153  | 4.462  | 3.239  | -1.571 | -3.719 | 12775  | CCR7     | NM_001301713_11_-1 |
| Atp5g3   | 6.457  | 6.191  | 6.412  | 6.292  | 5.596  | 5.463  | 5.894  | 5.745  | 4.851  | 4.968  | 228033 | ATP5G3   | NM_001301721_2_-1  |
| Atp5g3   | 0.848  | 1.090  | 0.200  | 0.204  | 0.073  | -1.203 | -0.762 | -0.827 | -0.574 | -0.355 | 228033 | ATP5G3   | NM_001301722_2_-1  |
| Fdx1     | -1.909 | -1.408 | 0.084  | -0.895 | 0.213  | -1.167 | -1.600 | -1.637 | 0.291  | -0.908 | 14148  | FDX1     | NM_001301728_9_-1  |
| Dnm1     | -4.981 | -3.390 | -4.968 | -4.968 | -4.406 | -4.964 | -4.953 | -4.967 | -4.981 | -4.981 | 13429  | DNM1     | NM_001301737_2_-1  |
| Ifi211   | 0.200  | 0.369  | 3.660  | 2.387  | -1.833 | 0.802  | 2.124  | 1.768  | 4.426  | 1.614  | 381308 | IFI16    | NM_001301745_1_-1  |
| Ptpdc1   | -3.891 | -3.638 | -2.625 | -2.164 | -2.323 | -1.013 | -4.369 | -2.133 | -1.066 | -1.784 | 218232 | PTPDC1   | NM_001301781_13_-1 |
| E4f1     | 3.291  | 3.645  | 3.838  | 3.309  | 4.089  | 3.975  | 3.737  | 3.529  | 4.351  | 4.154  | 13560  | E4F1     | NM_001301784_17_-1 |
| Hes2     | -4.981 | -4.981 | -2.071 | -3.751 | -2.056 | -3.379 | -3.650 | -4.883 | -2.022 | -3.848 | 15206  | HES2     | NM_001301805_4_+1  |
| Irf8     | 4.091  | 4.789  | 3.939  | 3.927  | -3.816 | -3.006 | -0.046 | 0.829  | -1.263 | -0.105 | 15900  | IRF8     | NM_001301811_8_+1  |
| Fgd4     | -0.019 | -1.252 | -0.824 | -1.102 | -1.963 | -2.618 | 0.285  | -0.809 | 2.551  | 2.901  | 224014 | FGD4     | NM_001301817_16_-1 |
| Fgd4     | -0.836 | -0.109 | -2.862 | -1.094 | -1.016 | -0.973 | 3.579  | 4.404  | 6.103  | 6.412  | 224014 | FGD4     | NM_001301818_16_-1 |
| Arhgap15 | -0.883 | -0.527 | -0.611 | 0.309  | 0.540  | -0.082 | 0.012  | -0.531 | 0.913  | 0.632  | 76117  | ARHGAP15 | NM_001301831_2_+1  |
| Arhgap15 | 0.704  | -0.992 | 1.201  | -0.028 | 1.687  | 1.058  | 0.707  | -0.434 | 0.361  | 0.921  | 76117  | ARHGAP15 | NM_001301832_2_+1  |
| Slc7a3   | -1.071 | -3.267 | -4.463 | -4.937 | -1.427 | -4.239 | -4.907 | -4.378 | -4.190 | -4.981 | 11989  | SLC7A3   | NM_001301840_X_-1  |
| Azin2    | -4.981 | -4.981 | -4.664 | -4.774 | -4.405 | -4.999 | -4.980 | -3.674 | -2.253 | -2.305 | 242669 | AZIN2    | NM_001301841_4_-1  |
| Stk11    | -4.981 | -4.981 | -4.982 | -4.982 | -4.981 | -4.981 | -4.981 | -4.981 | -4.981 | -4.981 | 20869  | STK11    | NM_001301853_10_+1 |
| Stk11    | 3.546  | 2.824  | 1.191  | 1.401  | 1.998  | 2.443  | 1.676  | 1.930  | -0.252 | 0.363  | 20869  | STK11    | NM_001301854_10_+1 |
| Uba3     | 0.917  | 0.771  | 0.378  | -0.183 | -0.219 | -0.135 | -1.274 | -1.059 | 0.407  | 0.813  | 22200  | UBA3     | NM_001301857_6_-1  |
| Uba3     | -0.405 | 0.515  | -0.175 | -1.892 | -2.699 | -4.699 | 0.021  | -0.951 | -0.753 | 0.703  | 22200  | UBA3     | NM_001301858_6_-1  |
| Uba3     | -1.572 | -3.591 | -0.320 | 0.820  | -1.337 | -2.096 | -1.931 | 0.787  | 2.102  | 1.078  | 22200  | UBA3     | NM_001301859_6_-1  |
| Ikzf1    | 1.241  | 1.584  | -0.844 | 1.652  | 1.025  | 2.143  | 2.503  | 3.741  | 2.957  | 4.497  | 22778  | IKZF1    | NM_001301863_11_+1 |
| Ikzf1    | -0.353 | -1.775 | -3.863 | -1.380 | -2.829 | -2.572 | -0.274 | -0.941 | 0.899  | 3.853  | 22778  | IKZF1    | NM_001301865_11_+1 |
| Ikzf1    | 4.499  | 4.435  | 2.431  | 2.613  | 3.773  | 3.806  | 3.281  | 2.738  | 3.789  | 3.300  | 22778  | IKZF1    | NM_001301866_11_+1 |
| Ikzf1    | 3.014  | 3.950  | 1.723  | 2.241  | 3.442  | 2.933  | 2.678  | 2.397  | 1.423  | 2.685  | 22778  | IKZF1    | NM_001301868_11_+1 |
| Fkbp1a   | 2.888  | 2.643  | 2.963  | 2.743  | 1.581  | 1.572  | 2.265  | 1.928  | 2.662  | 1.785  | 14225  | FKBP1A   | NM_001302077_2_+1  |
| Fkbp1a   | -0.941 | 0.503  | 0.491  | 0.849  | -0.180 | -1.198 | -0.353 | -0.406 | 0.907  | 0.358  | 14225  | FKBP1A   | NM_001302078_2_+1  |
| Fkbp1a   | 0.863  | -0.064 | 0.040  | 0.232  | -0.986 | -1.969 | -0.119 | -1.207 | -0.215 | -0.694 | 14225  | FKBP1A   | NM_001302079_2_+1  |
| Fkbp1a   | -4.138 | -2.736 | -2.737 | -2.711 | -3.880 | -2.989 | -3.745 | -4.692 | -3.071 | -4.270 | 14225  | FKBP1A   | NM_001302080_2_+1  |
| Dlgap3   | -4.776 | -4.981 | -4.736 | -4.874 | -4.936 | -4.972 | -4.871 | -4.953 | -4.727 | -4.981 | 242667 | DLGAP3   | NM_001302081_4_+1  |
| Uros     | 2.464  | 2.456  | 0.982  | 1.472  | 1.328  | 1.510  | 0.631  | 0.737  | -0.923 | 0.333  | 22276  | UROS     | NM_001302085_7_-1  |
| Uros     | -0.459 | 0.791  | -2.848 | -1.023 | -0.710 | -1.048 | -0.841 | -0.345 | -0.182 | -1.390 | 22276  | UROS     | NM_001302086_7_-1  |
| Uros     | 4.927  | 4.991  | 3.866  | 4.259  | 4.300  | 4.701  | 3.811  | 4.180  | 2.376  | 2.493  | 22276  | UROS     | NM_001302087_7_-1  |
| Gfra2    | -3.912 | -3.589 | -4.245 | -3.236 | -0.866 | -0.214 | -0.395 | -0.789 | -4.255 | -4.546 | 14586  | GFRA2    | NM_001302094_14_+1 |
| Gfra2    | -0.623 | -1.266 | -2.052 | 0.083  | 0.755  | 0.760  | 0.860  | -2.185 | -3.727 | -2.473 | 14586  | GFRA2    | NM_001302095_14_+1 |
| Usp3     | 1.579  | 0.876  | -2.459 | -0.879 | -0.436 | -2.368 | 0.049  | 0.028  | 0.944  | -2.140 | 235441 | USP3     | NM_001302116_9_-1  |
| Usp3     | -1.669 | -0.691 | -0.521 | -0.763 | -0.090 | -0.737 | -1.110 | -2.352 | 0.176  | -0.962 | 235441 | USP3     | NM_001302122_9_-1  |
| Cenpa    | 2.288  | 2.220  | 4.267  | 4.381  | 4.175  | 3.939  | 3.951  | 3.784  | 2.338  | 2.414  | 12615  | CENPA    | NM_001302129_5_+1  |
| Cenpa    | -4.789 | -3.762 | -3.902 | -4.952 | -4.946 | -4.976 | -2.711 | -3.959 | -4.785 | -4.943 | 12615  | CENPA    | NM_001302130_5_+1  |
| Cenpa    | -1.469 | -1.017 | 0.882  | 1.477  | -0.325 | -1.456 | 0.579  | 0.630  | 0.697  | -1.010 | 12615  | CENPA    | NM_001302131_5_+1  |
| Cenpa    | -2.556 | -4.981 | -2.994 | -4.114 | -2.454 | -3.996 | -2.232 | -4.056 | -2.500 | -3.239 | 12615  | CENPA    | NM_001302132_5_+1  |
| Myof     | -1.302 | -2.207 | 2.951  | 5.046  | -0.053 | 1.518  | 3.371  | 4.727  | 4.516  | 6.039  | 226101 | MYOF     | NM_001302140_19_-1 |
| Erg      | -4.688 | -4.981 | -4.945 | -4.916 | -4.894 | -4.959 | -4.897 | -4.926 | -4.786 | -4.981 | 13876  | ERG      | NM_001302152_16_-1 |
| Erg      | -4.454 | -4.981 | -4.923 | -4.789 | -4.778 | -4.929 | -4.813 | -4.810 | -3.949 | -4.981 | 13876  | ERG      | NM_001302153_16_-1 |
| Erg      | -3.907 | -4.981 | -4.709 | -4.397 | -4.301 | -4.190 | -4.435 | -4.310 | -2.101 | -4.981 | 13876  | ERG      | NM_001302154_16_-1 |
| Acs1l    | 0.553  | -0.883 | -3.226 | -3.408 | -1.967 | -4.831 | -1.641 | -1.286 | 0.076  | -1.325 | 14081  | ACSL1    | NM_001302163_8_+1  |

|         |        |        |        |        |        |        |        |        |        |        |           |         |                    |
|---------|--------|--------|--------|--------|--------|--------|--------|--------|--------|--------|-----------|---------|--------------------|
| Erg     | -4.454 | -4.981 | -4.881 | -4.821 | -4.800 | -4.930 | -4.813 | -4.810 | -4.483 | -4.981 | 13876     | ERG     | NM_001302179_16_-1 |
| Erg     | -3.869 | -4.981 | -4.686 | -4.370 | -4.403 | -4.162 | -4.400 | -4.160 | -2.283 | -4.981 | 13876     | ERG     | NM_001302183_16_-1 |
| Gpr87   | -4.981 | -4.981 | -4.751 | -3.861 | -4.980 | -4.980 | -4.965 | -4.950 | -4.981 | -4.981 | 84111     | GPR87   | NM_001302203_3_-1  |
| Lmo1    | -1.608 | -4.981 | 2.605  | -0.984 | -1.510 | -3.481 | 2.721  | 0.753  | 3.204  | 1.791  | 109594    | LMO1    | NM_001302205_7_-1  |
| Lmo1    | -3.668 | -4.981 | -4.687 | -3.378 | -2.917 | -3.821 | -4.329 | -4.221 | -4.749 | -4.924 | 109594    | LMO1    | NM_001302206_7_-1  |
| Flii    | 3.879  | 3.405  | 4.673  | 4.485  | 4.092  | 3.882  | 3.868  | 4.344  | 5.056  | 5.127  | 14248     | FLII    | NM_001302207_11_-1 |
| Atp5j   | 5.010  | 4.837  | 4.041  | 3.896  | 3.686  | 3.616  | 4.095  | 3.501  | 3.110  | 2.735  | 11957     | ATP5J   | NM_001302213_16_-1 |
| Atp5j   | 7.829  | 7.686  | 7.023  | 7.086  | 6.902  | 6.858  | 7.318  | 7.137  | 6.241  | 5.965  | 11957     | ATP5J   | NM_001302214_16_-1 |
| Atp5j   | 7.028  | 6.518  | 6.851  | 6.702  | 6.495  | 6.496  | 7.132  | 6.623  | 5.965  | 6.048  | 11957     | ATP5J   | NM_001302215_16_-1 |
| Atp5j   | 4.426  | 4.334  | 3.390  | 3.287  | 3.213  | 3.197  | 3.305  | 3.306  | 2.108  | 2.023  | 11957     | ATP5J   | NM_001302216_16_-1 |
| Tmem138 | 1.414  | 1.294  | 0.135  | -0.095 | 0.401  | 0.254  | -0.264 | -0.198 | -1.493 | -1.535 | 72982     | TMEM138 | NM_001302218_19_-1 |
| Pmp22   | -4.841 | -4.095 | -4.979 | -4.978 | -4.980 | -4.980 | -4.933 | -3.770 | -4.981 | -2.733 | 18858     | PMP22   | NM_001302255_11_+1 |
| Pmp22   | -4.780 | -3.756 | -4.977 | -4.975 | -4.978 | -4.978 | -4.976 | -4.906 | -4.981 | -4.929 | 18858     | PMP22   | NM_001302257_11_+1 |
| Pmp22   | -4.773 | -3.714 | -4.977 | -4.975 | -4.978 | -4.978 | -4.970 | -4.897 | -4.981 | -4.925 | 18858     | PMP22   | NM_001302258_11_+1 |
| Pmp22   | -4.657 | -2.110 | -4.950 | -4.942 | -4.931 | -4.931 | -4.970 | -4.418 | -4.981 | -4.874 | 18858     | PMP22   | NM_001302259_11_+1 |
| Pmp22   | -4.850 | -4.136 | -4.979 | -4.978 | -4.980 | -4.980 | -4.976 | -4.944 | -4.981 | -4.947 | 18858     | PMP22   | NM_001302260_11_+1 |
| Pmp22   | -1.187 | -2.089 | -4.959 | -3.636 | -4.966 | -4.960 | -4.937 | -4.182 | -4.981 | -2.799 | 18858     | PMP22   | NM_001302261_11_+1 |
| Aktip   | 4.384  | 4.289  | 3.445  | 3.147  | 3.228  | 2.779  | 3.187  | 2.536  | 2.927  | 2.385  | 14339     | AKTIP   | NM_001302266_8_-1  |
| Aktip   | 1.303  | 3.324  | -0.116 | 2.260  | -1.705 | 1.051  | -1.185 | 1.238  | -0.112 | 0.566  | 14339     | AKTIP   | NM_001302267_8_-1  |
| Aktip   | 3.699  | 2.289  | 2.644  | 2.140  | 1.864  | 0.880  | 1.754  | 2.017  | 2.233  | 2.671  | 14339     | AKTIP   | NM_001302268_8_-1  |
| Cnih2   | -4.346 | -3.473 | -4.323 | -4.845 | -4.964 | -4.960 | -4.251 | -4.923 | -4.280 | -2.818 | 12794     | CNIH2   | NM_001302333_19_-1 |
| Mrpl55  | 0.940  | -4.981 | -1.708 | -2.477 | 0.069  | -2.709 | -0.866 | -2.360 | -0.203 | -1.559 | 67212     | MRPL55  | NM_001302334_11_+1 |
| Mrpl55  | 3.161  | 3.344  | 2.844  | 2.392  | 2.395  | 2.383  | 2.880  | 2.003  | 1.941  | 1.563  | 67212     | MRPL55  | NM_001302335_11_+1 |
| Mrpl55  | 5.144  | 5.571  | 3.929  | 4.616  | 3.997  | 4.523  | 4.062  | 4.557  | 3.322  | 3.224  | 67212     | MRPL55  | NM_001302336_11_+1 |
| Aktip   | -0.054 | -4.981 | -0.743 | -2.859 | -0.747 | -3.424 | -1.196 | -3.435 | -1.199 | -1.874 | 14339     | AKTIP   | NM_001302337_8_-1  |
| Nfe2    | -4.981 | -4.981 | -4.972 | -2.391 | -4.388 | -1.690 | -2.583 | -2.686 | 1.836  | 0.518  | 18022     | NFE2    | NM_001302338_15_-1 |
| Nfe2    | -4.981 | -4.981 | -4.860 | -1.012 | -4.915 | -2.292 | -1.940 | -0.811 | 2.451  | 2.525  | 18022     | NFE2    | NM_001302339_15_-1 |
| Nfe2    | -1.781 | 0.739  | -0.674 | -0.274 | -0.817 | 0.637  | 0.531  | 0.224  | 0.618  | -0.203 | 18022     | NFE2    | NM_001302340_15_-1 |
| Nfe2    | -3.658 | -3.448 | -4.014 | -4.468 | -4.372 | -4.845 | -4.102 | -4.406 | -3.612 | -4.138 | 18022     | NFE2    | NM_001302341_15_-1 |
| Dvl1    | 3.275  | 3.216  | 3.741  | 3.108  | 3.518  | 3.531  | 3.396  | 3.317  | 3.629  | 3.584  | 13542     | DVL1    | NM_001302342_4_+1  |
| Nfe2    | -3.959 | -0.779 | -3.448 | 1.512  | -1.136 | 0.124  | 2.790  | 2.796  | 5.485  | 4.988  | 18022     | NFE2    | NM_001302343_15_-1 |
| P2ry2   | -3.979 | -4.981 | -2.167 | -3.103 | -0.463 | -2.155 | -3.870 | -2.861 | -1.252 | -3.477 | 18442     | P2RY2   | NM_001302346_7_-1  |
| P2ry2   | -2.962 | -4.981 | -0.778 | -1.715 | -1.714 | -1.791 | -1.311 | -1.389 | -0.279 | 0.473  | 18442     | P2RY2   | NM_001302347_7_-1  |
| Kcnt1   | -4.981 | -4.981 | -4.969 | -4.742 | -4.517 | -4.751 | -4.955 | -4.262 | -4.981 | -4.981 | 227632    | KCNT1   | NM_001302351_2_+1  |
| Umad1   | 1.724  | -1.611 | 0.212  | -3.586 | 0.729  | -0.610 | 0.466  | -0.409 | 0.228  | -0.398 | 100036521 | NA      | NM_001302353_6_+1  |
| Umad1   | 4.053  | 4.626  | 5.223  | 5.238  | 4.820  | 5.025  | 4.758  | 4.664  | 4.472  | 4.910  | 100036521 | NA      | NM_001302354_6_+1  |
| Shox2   | -4.981 | -4.981 | -4.978 | -4.978 | -4.973 | -4.973 | -4.980 | -4.981 | -4.981 | -4.972 | 20429     | SHOX2   | NM_001302357_3_-1  |
| Shox2   | -4.981 | -4.981 | -4.920 | -4.920 | -4.954 | -4.875 | -3.939 | -3.215 | -4.981 | -3.165 | 20429     | SHOX2   | NM_001302358_3_-1  |
| Zkscan6 | 3.469  | 3.594  | 3.397  | 3.662  | 3.369  | 3.175  | 3.234  | 2.992  | 3.310  | 3.475  | 52712     | ZNF18   | NM_001302374_11_+1 |
| Zkscan6 | 3.344  | 3.742  | 2.988  | 2.725  | 3.084  | 3.184  | 3.035  | 3.126  | 3.167  | 2.995  | 52712     | ZNF18   | NM_001302375_11_+1 |
| Ccrl2   | 1.448  | 1.014  | 2.821  | 2.716  | 6.892  | 7.340  | 6.375  | 6.962  | 5.440  | 6.701  | 54199     | CCR2    | NM_001302376_9_-1  |
| Ccrl2   | -0.975 | 0.488  | 3.017  | 3.891  | 7.081  | 8.253  | 6.133  | 7.087  | 4.571  | 7.010  | 54199     | CCR2    | NM_001302377_9_-1  |
| Cdc37l1 | 1.941  | 2.486  | 2.395  | 2.269  | 2.816  | 3.293  | 2.564  | 2.624  | 2.528  | 2.883  | 67072     | CDC37L1 | NM_001302380_19_+1 |
| Cdc37l1 | 3.492  | 3.517  | 3.154  | 3.045  | 3.854  | 3.672  | 3.263  | 3.245  | 2.966  | 3.384  | 67072     | CDC37L1 | NM_001302382_19_+1 |
| March8  | -4.981 | -3.518 | -4.538 | -1.007 | -1.841 | -0.249 | -2.893 | -1.308 | 1.997  | 2.004  | 71779     | MARCH8  | NM_001302383_6_+1  |
| March8  | -4.981 | -2.616 | -0.685 | 0.262  | -2.325 | -0.421 | -1.432 | 0.018  | -0.158 | 2.265  | 71779     | MARCH8  | NM_001302384_6_+1  |
| March8  | -4.981 | -0.454 | -4.526 | -4.535 | -4.836 | -2.352 | -2.219 | -2.524 | -1.809 | -0.591 | 71779     | MARCH8  | NM_001302385_6_+1  |
| Cln4    | 5.260  | 4.999  | 5.186  | 5.196  | 5.727  | 4.956  | 5.775  | 5.382  | 6.032  | 5.799  | 12727     | CLCN4   | NM_001302386_7_-1  |
| Cln4    | 3.626  | 4.324  | 3.765  | 4.590  | 3.924  | 4.275  | 3.950  | 4.376  | 4.249  | 5.119  | 12727     | CLCN4   | NM_001302387_7_-1  |
| Plpp2   | -1.301 | 1.348  | 1.074  | 1.810  | -0.782 | -3.497 | 1.253  | 2.221  | 0.690  | 2.372  | 50784     | PLPP2   | NM_001302389_10_-1 |
| Plpp2   | -4.366 | -4.255 | -2.081 | -2.954 | -3.684 | -2.367 | -3.865 | -4.903 | -0.289 | 0.504  | 50784     | PLPP2   | NM_001302390_10_-1 |
| Ppt2    | 3.668  | 3.804  | 3.430  | 3.796  | 1.686  | -0.372 | 3.732  | 3.923  | 5.255  | 5.232  | 54397     | PPT2    | NM_001302393_17_-1 |
| Ppt2    | 1.862  | 3.535  | 4.223  | 4.116  | 1.797  | 1.596  | 3.343  | 3.046  | 1.032  | 2.252  | 54397     | PPT2    | NM_001302394_17_-1 |
| Ppt2    | -3.715 | -0.010 | -2.073 | -4.318 | -4.612 | -1.450 | -1.712 | -2.684 | -3.823 | -0.712 | 54397     | PPT2    | NM_001302395_17_-1 |
| Ppt2    | 3.170  | 0.671  | 2.044  | 2.665  | -0.693 | 0.979  | 2.111  | 2.292  | 3.407  | 3.037  | 54397     | PPT2    | NM_001302396_17_-1 |
| Phf1    | -0.882 | -0.110 | -0.868 | -2.750 | -1.150 | -0.939 | -1.229 | -1.222 | 0.167  | 0.301  | 21652     | PHF1    | NM_001302397_17_+1 |
| Zfp422  | 3.088  | 3.134  | 1.702  | 2.557  | 0.599  | 0.591  | 1.655  | 1.534  | 0.585  | 2.602  | 67255     | ZNF22   | NM_001302439_6_-1  |
| Zfp422  | -4.211 | -3.816 | -0.247 | -1.279 | -0.661 | -2.254 | -0.892 | -1.748 | -0.325 | -4.707 | 67255     | ZNF22   | NM_001302440_6_-1  |
| Plpp2   | -1.274 | -3.226 | -4.306 | -4.650 | -4.679 | -2.287 | -4.453 | -4.876 | -4.322 | -4.536 | 50784     | PLPP2   | NM_001302442_10_-1 |
| Cdc37l1 | 1.745  | 2.293  | -0.286 | 1.496  | 2.335  | 1.984  | 2.202  | 1.168  | 0.765  | 2.455  | 67072     | CDC37L1 | NM_001302443_19_+1 |
| Rnf10   | 1.491  | 0.646  | 2.416  | 2.265  | 1.000  | 1.802  | 2.151  | 0.761  | 3.443  | 2.570  | 50849     | RNF10   | NM_001302448_5_-1  |
| Rnf10   | 2.056  | 2.447  | 2.084  | 2.782  | 2.097  | 1.511  | 1.491  | 2.874  | 3.019  | 3.749  | 50849     | RNF10   | NM_001302449_5_-1  |
| Ing1    | -2.023 | -0.103 | -1.742 | 0.676  | -1.224 | -0.616 | 0.312  | -0.424 | -0.510 | 0.144  | 26356     | ING1    | NM_001302451_8_+1  |
| Ing1    | 3.689  | 4.085  | 3.279  | 2.724  | 3.061  | 2.065  | 3.308  | 3.659  | 2.380  | 3.170  | 26356     | ING1    | NM_001302457_8_+1  |
| Ing1    | -4.485 | -1.566 | -1.989 | -0.246 | -3.807 | -2.731 | -2.163 | -2.483 | 0.123  | -1.962 | 26356     | ING1    | NM_001302458_8_+1  |
| Ing1    | 3.214  | 3.184  | 2.336  | 2.865  | 2.726  | 3.076  | 3.087  | 2.870  | 3.593  | 3.378  | 26356     | ING1    | NM_001302459_8_+1  |
| Ing1    | -4.000 | -1.268 | 0.089  | -3.991 | -2.175 | -0.678 | -1.048 | -2.037 | 0.755  | -3.763 | 26356     | ING1    | NM_001302460_8_+1  |
| Sdf4    | 8.081  | 8.022  | 6.726  | 6.424  | 7.251  | 7.164  | 7.165  | 6.874  | 6.977  | 6.585  | 20318     | SDF4    | NM_001302467_4_+1  |
| Sdf4    | 5.152  | 5.037  | 3.965  | 4.033  | 3.255  | 3.765  | 3.331  | 4.317  | 2.871  | 3.489  | 20318     | SDF4    | NM_001302468_4_+1  |
| Sdf4    | 4.955  | 4.598  | 4.498  | 4.644  | 4.738  | 4.846  | 3.776  | 4.556  | 4.773  | 4.591  | 20318     | SDF4    | NM_001302469_4_+1  |
| Itga10  | -1.001 | -2.437 | -0.488 | -3.258 | -0.445 | -2.932 | -1.299 | -3.537 | -1.850 | -2.580 | 213119    | ITGA10  | NM_001302471_3_+1  |
| Meis3   | 1.687  | -0.127 | -3.667 | -1.884 | 1.121  | 1.814  | 0.452  | 0.144  | -4.638 | -0.980 | 17537     | MEIS3   | NM_001302472_7_+1  |
| Pld2    | -3.779 | -0.966 | -0.673 | 0.867  | 1.002  | 0.012  | -2.363 | -0.332 | -4.075 | 0.680  | 18806     | PLD2    | NM_001302475_11_+1 |
| Pld2    | -3.160 | -1.447 | -0.977 | -0.715 | -0.162 | -0.367 | -0.676 | -1.214 | -1.195 | -0.488 | 18806     | PLD2    | NM_001302476_11_+1 |

|         |        |        |        |        |        |        |        |        |        |        |        |         |                    |
|---------|--------|--------|--------|--------|--------|--------|--------|--------|--------|--------|--------|---------|--------------------|
| Acy3    | -4.981 | -4.981 | -0.171 | 0.896  | -4.923 | -4.900 | -3.730 | -3.714 | -4.942 | -3.989 | 71670  | ACY3    | NM_001302479_19_+1 |
| Acy3    | -4.981 | -4.981 | -0.808 | -1.840 | -4.771 | -4.682 | -2.868 | -4.985 | -4.937 | -3.498 | 71670  | ACY3    | NM_001302480_19_+1 |
| Acy3    | -4.981 | -4.981 | -2.858 | -3.730 | -4.972 | -4.884 | -4.370 | -3.365 | -3.083 | -4.972 | 71670  | ACY3    | NM_001302481_19_+1 |
| Acy3    | -4.981 | -4.981 | -3.151 | -4.967 | -4.609 | -4.926 | -4.942 | -4.890 | -2.889 | -2.136 | 71670  | ACY3    | NM_001302482_19_+1 |
| Gzmm    | -4.981 | -4.981 | -4.970 | -4.970 | -3.928 | -4.331 | -3.554 | -4.922 | -2.829 | -4.032 | 16904  | GZMM    | NM_001302485_10_+1 |
| Gzmm    | -4.981 | -4.428 | -2.284 | -4.502 | -3.167 | -3.876 | -4.578 | -3.570 | -2.376 | -3.680 | 16904  | GZMM    | NM_001302499_10_+1 |
| Tmub2   | 3.612  | 3.639  | 3.159  | 3.268  | 3.597  | 3.353  | 2.816  | 3.381  | 3.440  | 3.590  | 72053  | TMUB2   | NM_001302505_11_+1 |
| Tmub2   | 3.049  | 2.865  | 3.028  | 3.345  | 2.656  | 2.197  | 2.513  | 2.968  | 3.933  | 4.116  | 72053  | TMUB2   | NM_001302506_11_+1 |
| Galt    | 1.453  | 2.313  | 1.503  | 1.447  | 1.746  | 1.460  | 1.206  | 1.101  | 0.374  | 0.529  | 14430  | GALT    | NM_001302511_4_+1  |
| Esr1    | -1.935 | -2.317 | -4.067 | -2.959 | -3.712 | -3.791 | -1.764 | -4.072 | -3.050 | 0.457  | 13982  | ESR1    | NM_001302531_10_+1 |
| Esr1    | -3.068 | -4.100 | -3.119 | -2.815 | 0.184  | -0.864 | 0.373  | 0.403  | 2.320  | 1.592  | 13982  | ESR1    | NM_001302532_10_+1 |
| Esr1    | -4.981 | -4.617 | -4.904 | -4.195 | -4.961 | -3.264 | -4.922 | -3.958 | -2.503 | -4.981 | 13982  | ESR1    | NM_001302533_10_+1 |
| Zbed3   | 2.531  | 1.944  | 2.727  | 2.929  | 2.084  | 2.078  | 1.780  | 1.678  | 1.771  | 1.899  | 72114  | ZBED3   | NM_001302538_13_+1 |
| Zbed3   | 0.870  | 0.401  | 1.012  | 1.125  | 0.663  | 0.115  | 0.050  | -0.283 | 0.451  | 0.285  | 72114  | ZBED3   | NM_001302539_13_+1 |
| Mcm5    | -1.127 | 1.272  | 3.521  | 4.152  | 4.301  | 3.747  | 3.295  | 3.848  | 2.071  | 1.330  | 17218  | MCM5    | NM_001302540_8_+1  |
| Cfap46  | -4.981 | -4.981 | -4.976 | -4.479 | -4.144 | -3.327 | -4.941 | -4.254 | -4.981 | -4.981 | 212124 | NA      | NM_001302546_7_-1  |
| Zfp131  | 4.080  | 4.437  | 1.169  | 1.118  | 2.329  | 1.577  | 1.355  | 2.248  | 2.282  | 2.275  | 72465  | ZNF131  | NM_001302547_13_-1 |
| Zfp131  | 4.094  | 4.393  | 2.537  | 1.926  | 2.620  | 2.907  | 2.722  | 2.237  | 2.254  | 2.537  | 72465  | ZNF131  | NM_001302548_13_-1 |
| Zfp131  | 2.920  | 2.455  | 1.736  | -1.464 | 0.713  | 1.679  | 0.342  | -0.376 | 1.801  | -0.260 | 72465  | ZNF131  | NM_001302549_13_-1 |
| Zfp131  | 3.414  | 4.149  | 2.879  | 3.132  | 2.145  | 2.268  | 3.091  | 3.020  | 2.275  | 2.889  | 72465  | ZNF131  | NM_001302550_13_-1 |
| Lrrc23  | -4.981 | -4.981 | -4.975 | -3.698 | -4.881 | -3.864 | -4.973 | -4.457 | -4.981 | -2.969 | 16977  | LRRC23  | NM_001302555_6_-1  |
| Slnf4   | -4.981 | -4.981 | -1.655 | -0.738 | -4.327 | -0.085 | -0.287 | 0.280  | 4.297  | 4.628  | 20558  | SLFN12L | NM_001302559_11_+1 |
| Ciita   | -4.816 | -4.641 | 8.372  | 8.269  | 7.565  | 7.560  | 7.847  | 7.332  | 2.808  | 2.853  | 12265  | CIITA   | NM_001302618_16_+1 |
| Ciita   | -1.518 | 0.615  | 2.813  | 2.903  | 3.206  | 3.220  | 2.993  | 1.971  | -1.370 | 0.105  | 12265  | CIITA   | NM_001302619_16_+1 |
| Osbp2   | -4.796 | -4.545 | -4.981 | -4.981 | -4.981 | -4.981 | -4.939 | -4.960 | -4.981 | -4.981 | 74309  | OSBP2   | NM_001302630_11_-1 |
| Osbp2   | -4.845 | -1.803 | -4.972 | -4.972 | -4.980 | -4.980 | -4.981 | -4.981 | -4.981 | -4.981 | 74309  | OSBP2   | NM_001302631_11_-1 |
| Phactr1 | -4.981 | -4.981 | -4.967 | -4.677 | -4.981 | -4.981 | -4.981 | -4.981 | -4.981 | -4.981 | 218194 | PHACTR1 | NM_001302635_13_+1 |
| Phactr1 | -4.981 | -4.981 | -4.973 | -4.826 | -4.954 | -4.954 | -4.981 | -4.981 | -4.981 | -4.981 | 218194 | PHACTR1 | NM_001302636_13_+1 |
| Cacna1d | -3.617 | -2.343 | -4.390 | -4.720 | -4.868 | -4.942 | -4.443 | -4.813 | -4.444 | -4.633 | 12289  | CACNA1D | NM_001302637_14_-1 |
| Eno2    | -4.981 | -4.981 | 1.815  | 2.061  | 1.486  | 1.011  | 0.465  | -1.174 | -4.981 | -2.946 | 13807  | ENO2    | NM_001302642_6_-1  |
| Ifi203  | 3.718  | 5.256  | 1.785  | 1.741  | 3.418  | 4.659  | 3.050  | 5.190  | 4.493  | 6.201  | 15950  | IFI16   | NM_001302649_1_-1  |
| Ifi203  | 2.636  | 2.022  | 0.006  | -2.672 | 1.024  | 1.885  | 1.699  | 1.303  | 1.031  | 2.127  | 15950  | IFI16   | NM_001302650_1_-1  |
| Ifi203  | 6.903  | 5.838  | 3.996  | 1.033  | 5.763  | 4.912  | 5.917  | 4.863  | 6.005  | 5.112  | 15950  | IFI16   | NM_001302651_1_-1  |
| Dclre1c | 2.144  | 3.358  | 0.448  | 0.070  | 0.441  | 0.663  | 0.353  | 0.124  | 2.174  | 1.264  | 227525 | DCLRE1C | NM_001302674_2_+1  |
| Lair1   | 6.654  | 6.315  | 1.231  | -0.773 | 2.726  | 2.711  | 2.901  | 2.049  | 2.492  | 2.442  | 52855  | LAIR1   | NM_001302675_7_-1  |
| Lair1   | 3.239  | 2.418  | -4.740 | -4.128 | 1.329  | -0.297 | -0.530 | -1.467 | -0.133 | 0.400  | 52855  | LAIR1   | NM_001302676_7_-1  |
| Lair1   | 4.523  | 4.292  | -3.631 | -3.492 | 0.051  | -0.675 | 0.928  | -0.573 | -0.658 | -1.356 | 52855  | LAIR1   | NM_001302677_7_-1  |
| Lair1   | 7.799  | 7.896  | 1.828  | 2.656  | 5.330  | 5.447  | 5.169  | 5.303  | 4.746  | 4.902  | 52855  | LAIR1   | NM_001302681_7_-1  |
| Lair1   | 0.628  | 1.264  | -4.685 | -3.154 | -0.935 | -2.887 | -1.213 | -1.597 | -1.906 | -1.983 | 52855  | LAIR1   | NM_001302682_7_-1  |
| Lair1   | 5.602  | 5.605  | -0.922 | -1.991 | 2.992  | 3.159  | 2.273  | 1.751  | 2.606  | 1.501  | 52855  | LAIR1   | NM_001302683_7_-1  |
| Dclre1c | -0.925 | 0.297  | -4.611 | -0.843 | -3.050 | -2.422 | -4.711 | -0.305 | -0.853 | -2.362 | 227525 | DCLRE1C | NM_001302684_2_+1  |
| Ncoa2   | 3.062  | 3.367  | 2.335  | 1.937  | 2.121  | 1.931  | 1.479  | 2.090  | 2.716  | 3.445  | 17978  | NCOA2   | NM_001302702_1_-1  |
| Elmo2   | -2.185 | -2.169 | 0.456  | 0.158  | 1.226  | 1.528  | 1.050  | 1.130  | 3.198  | 2.637  | 140579 | ELMO2   | NM_001302752_2_-1  |
| Elmo2   | -3.092 | 0.492  | 0.067  | -1.188 | 1.113  | 1.726  | 1.989  | 2.193  | 2.254  | 3.237  | 140579 | ELMO2   | NM_001302754_2_-1  |
| Ldhb    | 4.443  | 0.982  | -3.999 | -4.893 | -1.586 | -4.991 | -2.050 | -4.626 | 2.797  | -0.471 | 16832  | LDHB    | NM_001302765_6_-1  |
| Iffo1   | 3.417  | 0.490  | 1.645  | 1.018  | 1.780  | 0.515  | 1.307  | 1.308  | 0.625  | 0.978  | 320678 | IFFO1   | NM_001302778_6_+1  |
| Iffo1   | 2.330  | 3.507  | 1.645  | 1.506  | 2.928  | 2.294  | 2.302  | 1.043  | 3.229  | 2.828  | 320678 | IFFO1   | NM_001302779_6_+1  |
| Oprm1   | -4.981 | -4.981 | -4.000 | -4.148 | -4.925 | -4.980 | -4.808 | -4.970 | -4.181 | -4.763 | 18390  | OPRM1   | NM_001302795_10_+1 |
| Oprm1   | -4.981 | -4.981 | 0.477  | -2.167 | -3.980 | -4.918 | -2.503 | -4.902 | -1.234 | -3.304 | 18390  | OPRM1   | NM_001302796_10_+1 |
| Rab27b  | -4.572 | -4.981 | -4.983 | -4.930 | -4.940 | -4.969 | -4.410 | -4.699 | -4.963 | -4.915 | 80718  | RAB27B  | NM_001302798_18_-1 |
| Rab27b  | -4.671 | -4.981 | -4.964 | -4.302 | -4.978 | -4.964 | -4.747 | -4.451 | -1.926 | -3.344 | 80718  | RAB27B  | NM_001302799_18_-1 |
| Mdm4    | 1.228  | 1.719  | 0.721  | 0.710  | -0.399 | -1.040 | 2.091  | 0.975  | 3.215  | 2.361  | 17248  | MDM4    | NM_001302801_1_-1  |
| Mdm4    | -1.173 | 1.399  | -1.194 | -0.912 | -2.745 | -3.842 | -0.602 | -0.716 | 2.522  | 3.607  | 17248  | MDM4    | NM_001302802_1_-1  |
| Mdm4    | 4.816  | 5.252  | 4.844  | 4.913  | 5.122  | 5.076  | 4.844  | 5.226  | 4.786  | 5.092  | 17248  | MDM4    | NM_001302803_1_-1  |
| Mdm4    | 0.524  | 2.430  | 1.448  | 2.064  | 0.880  | 1.694  | 2.321  | 1.068  | 1.900  | 2.565  | 17248  | MDM4    | NM_001302804_1_-1  |
| Cic     | 4.336  | 4.545  | 4.125  | 4.338  | 4.549  | 4.546  | 4.268  | 4.193  | 4.864  | 4.872  | 71722  | CIC     | NM_001302811_7_+1  |
| Nsun7   | -3.090 | -4.981 | -1.809 | -3.401 | -4.980 | -4.980 | -4.981 | -4.981 | -4.981 | -4.981 | 70918  | NSUN7   | NM_001302833_5_+1  |
| Nsun7   | -4.981 | -4.981 | -0.941 | -4.956 | -4.949 | -4.949 | -4.981 | -4.981 | -4.981 | -4.981 | 70918  | NSUN7   | NM_001302834_5_+1  |
| Prdm4   | 2.176  | 1.843  | 1.623  | 2.601  | 1.550  | 2.079  | 2.373  | 2.376  | 3.828  | 4.094  | 72843  | PRDM4   | NM_001302886_10_-1 |
| Prdm4   | -3.845 | 0.239  | -1.414 | -1.951 | -1.910 | -0.907 | -2.509 | -0.461 | 0.735  | 0.198  | 72843  | PRDM4   | NM_001302887_10_-1 |
| Impdh1  | -0.387 | -4.143 | -1.116 | -2.032 | 0.058  | 0.876  | -0.558 | 0.446  | 1.402  | 1.243  | 23917  | IMPDH1  | NM_001302933_6_-1  |
| Impdh1  | -4.358 | -4.126 | -1.447 | -0.605 | 1.491  | -0.862 | -0.154 | 0.412  | 1.831  | 1.632  | 23917  | IMPDH1  | NM_001302934_6_-1  |
| Sh2b2   | 5.269  | 5.438  | 3.992  | 3.983  | 3.920  | 3.922  | 3.275  | 2.698  | 3.395  | 3.264  | 23921  | SH2B2   | NM_001302938_5_-1  |
| Sh2b2   | 2.635  | 3.264  | 0.482  | 0.405  | 1.284  | 0.906  | 0.876  | -0.560 | -0.424 | 0.313  | 23921  | SH2B2   | NM_001302939_5_-1  |
| Tle4    | 2.461  | 3.125  | 3.001  | 2.428  | 2.910  | 2.815  | 2.328  | 3.115  | 3.241  | 2.362  | 21888  | TLE4    | NM_001302947_19_-1 |
| Tle4    | 0.372  | 1.164  | 1.006  | 1.493  | 0.575  | 0.113  | 0.622  | 0.655  | 2.220  | 2.492  | 21888  | TLE4    | NM_001302950_19_-1 |
| Tle4    | -2.642 | -3.196 | -0.349 | 0.832  | -2.448 | -2.841 | -0.747 | -1.491 | 2.214  | 2.976  | 21888  | TLE4    | NM_001302951_19_-1 |
| Ubtf    | 2.170  | 2.114  | 4.360  | 3.512  | 4.444  | 4.689  | 4.649  | 4.755  | 5.204  | 4.789  | 21429  | UBTF    | NM_001302954_11_-1 |
| Ubtf    | -1.327 | -1.245 | -3.600 | -3.213 | -2.706 | -2.354 | -2.426 | -1.327 | 0.213  | -4.541 | 21429  | UBTF    | NM_001302955_11_-1 |
| Qsox2   | 2.307  | 2.401  | 2.383  | 1.692  | 1.827  | 1.680  | 1.609  | 1.598  | 2.750  | 2.738  | 227638 | QSOX2   | NM_001302956_2_-1  |
| Tyw5    | 0.031  | -0.250 | -1.201 | -1.421 | -1.754 | -2.461 | -2.298 | -1.832 | -0.674 | -1.337 | 68736  | TYW5    | NM_001302962_1_-1  |
| Tyw5    | -4.897 | -4.762 | -4.821 | -3.790 | -4.950 | -4.978 | -4.932 | -4.976 | -4.513 | -4.886 | 68736  | TYW5    | NM_001302963_1_-1  |
| Tyw5    | 3.843  | 4.041  | 3.161  | 3.088  | 2.978  | 2.871  | 2.657  | 2.682  | 2.165  | 2.373  | 68736  | TYW5    | NM_001302964_1_-1  |
| Prmt2   | 0.537  | 1.882  | -2.156 | -0.177 | -0.509 | -0.403 | 0.003  | -1.324 | -1.326 | 0.053  | 15468  | PRMT2   | NM_001302965_10_-1 |

|         |        |        |        |        |        |        |        |        |        |        |           |         |                    |
|---------|--------|--------|--------|--------|--------|--------|--------|--------|--------|--------|-----------|---------|--------------------|
| Gm21188 | 5.592  | 5.575  | 3.863  | 3.344  | 3.195  | 2.196  | 7.213  | 7.509  | 8.416  | 8.478  | 100861753 | NA      | NM_001302966_13_-1 |
| Ap2m1   | 7.628  | 7.705  | 8.113  | 8.232  | 7.909  | 7.881  | 7.812  | 8.175  | 8.603  | 8.558  | 11773     | AP2M1   | NM_001302970_16_+1 |
| Gng4    | -4.981 | -4.981 | -4.739 | -3.010 | -2.864 | -3.109 | -4.912 | -4.940 | -4.981 | -4.981 | 14706     | GNG4    | NM_001302997_13_+1 |
| Rnf138  | -0.512 | -1.973 | -1.908 | -2.652 | -1.953 | -2.369 | -0.158 | -2.955 | -4.715 | -1.991 | 56515     | RNF138  | NM_001303005_18_+1 |
| Rnf138  | 2.843  | 3.126  | 2.361  | 2.454  | 2.435  | 2.502  | 1.704  | 2.251  | 1.488  | 2.419  | 56515     | RNF138  | NM_001303011_18_+1 |
| Ap3s1   | -4.917 | -4.981 | -3.642 | -3.470 | -4.239 | -4.956 | -4.873 | -4.968 | -4.961 | -2.302 | 11777     | AP3S1   | NM_001303015_18_+1 |
| Prrg3   | -4.981 | -4.981 | -4.466 | -4.767 | -4.646 | -4.837 | -4.894 | -4.976 | -4.981 | -4.981 | 208748    | PRRG3   | NM_001303028_X_+1  |
| Ubr3    | 3.537  | 3.450  | 4.262  | 4.076  | 3.512  | 3.340  | 3.716  | 3.721  | 4.562  | 4.128  | 68795     | UBR3    | NM_001303033_2_+1  |
| Etv6    | 5.397  | 5.237  | 6.592  | 6.446  | 6.741  | 6.585  | 6.696  | 6.336  | 6.442  | 6.385  | 14011     | ETV6    | NM_001303102_6_+1  |
| Mycl    | 6.005  | 6.066  | 7.751  | 7.534  | 5.641  | 5.527  | 5.292  | 5.307  | 0.911  | 0.454  | 16918     | MYCL    | NM_001303121_4_+1  |
| Rd3     | -4.369 | -3.968 | -4.690 | -4.891 | -4.948 | -4.942 | -4.936 | -4.935 | -4.797 | -4.914 | 74023     | RD3     | NM_001303132_1_+1  |
| Folr2   | -0.170 | -1.310 | -3.330 | -3.863 | -4.482 | -4.796 | -3.319 | -4.662 | -2.932 | -2.903 | 14276     | FOLR2   | NM_001303231_7_-1  |
| Folr2   | -4.839 | -4.601 | -4.953 | -4.975 | -4.978 | -4.978 | -4.924 | -4.973 | -3.477 | -4.942 | 14276     | FOLR2   | NM_001303239_7_-1  |
| Il12b   | 1.773  | -3.408 | 7.136  | 3.872  | 3.612  | 3.642  | 2.417  | 3.075  | -4.981 | -4.981 | 16160     | IL12B   | NM_001303244_11_+1 |
| Agfg2   | 1.326  | -2.814 | 1.862  | 0.830  | 1.294  | 0.574  | 1.989  | 0.301  | 1.837  | 2.101  | 231801    | AGFG2   | NM_001303266_5_-1  |
| Agfg2   | -3.244 | 0.032  | 0.402  | 0.976  | -1.272 | -0.503 | 0.434  | -0.778 | 0.438  | 0.354  | 231801    | AGFG2   | NM_001303271_5_-1  |
| Traf6   | 3.886  | 3.599  | 4.350  | 4.240  | 4.572  | 4.243  | 4.685  | 4.445  | 5.539  | 5.196  | 22034     | TRAF6   | NM_001303273_2_+1  |
| Prdx6   | 2.078  | 2.133  | 1.863  | 2.422  | 3.365  | 3.949  | 2.847  | 3.186  | 2.363  | 2.434  | 11758     | PRDX6   | NM_001303408_1_-1  |
| Aldoc   | 5.536  | 5.111  | 4.054  | 4.501  | 0.157  | 0.382  | 2.152  | 3.006  | 1.565  | 1.312  | 11676     | ALDOC   | NM_001303423_11_+1 |
| Csnk2b  | 0.252  | 0.259  | 0.391  | -0.389 | -0.789 | 0.036  | -1.620 | -2.117 | 0.259  | -3.533 | 13001     | CSNK2B  | NM_001303445_17_-1 |
| Csnk2b  | -1.194 | -0.571 | 0.464  | 0.292  | -0.042 | -1.110 | -1.011 | -1.164 | -2.580 | -0.461 | 13001     | CSNK2B  | NM_001303446_17_-1 |
| Ccdc162 | 7.160  | 7.370  | -3.527 | -2.555 | -3.829 | -1.869 | -4.817 | -2.854 | -4.981 | -3.386 | 75973     | NA      | NM_001303469_10_-1 |
| Csnk2b  | -0.293 | 0.294  | -1.361 | -1.371 | -0.571 | -0.667 | -0.288 | -1.442 | -1.927 | -0.744 | 13001     | CSNK2B  | NM_001303476_17_-1 |
| Ap1g2   | 3.013  | 1.041  | 2.886  | 1.220  | 3.264  | 2.441  | 2.985  | 2.312  | 3.082  | 2.870  | 11766     | AP1G2   | NM_001303502_14_-1 |
| Hus1    | 0.302  | -3.776 | 1.686  | 0.862  | 2.134  | -0.599 | 0.584  | -0.222 | 1.437  | 1.231  | 15574     | HUS1    | NM_001303532_11_-1 |
| Hus1    | -1.337 | 0.461  | 0.020  | 0.745  | 0.413  | 1.217  | -0.501 | 0.909  | 1.634  | 0.841  | 15574     | HUS1    | NM_001303610_11_-1 |
| Srcap   | 4.828  | 4.762  | 5.217  | 5.140  | 5.691  | 5.514  | 4.924  | 4.917  | 5.347  | 5.248  | 100043597 | SRCAP   | NM_001304266_7_+1  |
| Tmem265 | 2.071  | 1.872  | 1.794  | 1.223  | 2.243  | 1.960  | 1.849  | 1.566  | 1.478  | 1.079  | 105180375 | NA      | NM_001304267_7_+1  |
| Rnf4    | 5.782  | 5.974  | 6.451  | 6.230  | 5.823  | 5.496  | 5.868  | 5.763  | 6.108  | 6.159  | 19822     | RNF4    | NM_001304269_5_+1  |
| Rnf4    | -0.267 | -0.457 | -0.160 | 1.307  | -0.100 | 0.421  | -0.763 | -0.474 | -0.393 | 0.942  | 19822     | RNF4    | NM_001304270_5_+1  |
| Sema4c  | 2.172  | 2.487  | 1.110  | 1.649  | -1.529 | -2.727 | -1.958 | -0.849 | -2.292 | -3.267 | 20353     | SEMA4C  | NM_001304329_1_-1  |
| Sema4c  | -4.293 | 0.685  | -1.775 | 0.219  | -4.898 | -4.303 | -4.689 | -4.864 | -1.050 | -4.940 | 20353     | SEMA4C  | NM_001304330_1_-1  |
| Cgnl1   | -0.125 | -0.909 | -3.608 | -4.919 | -4.981 | -4.980 | -4.545 | -1.484 | 0.145  | 3.218  | 68178     | CGNL1   | NM_001304362_9_-1  |
| Eif4g1  | 3.857  | 3.560  | 5.298  | 5.203  | 5.216  | 4.873  | 5.170  | 5.066  | 5.095  | 5.149  | 208643    | EIF4G1  | NM_001304432_16_+1 |
| Rnf13   | 3.006  | 2.631  | 1.588  | 0.992  | 0.810  | 1.912  | 1.792  | 0.462  | -0.303 | 1.314  | 24017     | RNF13   | NM_001304452_3_+1  |
| Rnf13   | 2.315  | 3.185  | -1.015 | -1.944 | 1.064  | 0.631  | -0.208 | -0.551 | -0.746 | -0.411 | 24017     | RNF13   | NM_001304456_3_+1  |
| Mrh3    | -2.169 | 2.162  | 1.681  | -0.288 | 0.976  | -0.157 | 0.394  | -0.701 | 1.590  | 1.982  | 217716    | MLH3    | NM_001304475_12_-1 |
| Senp7   | -2.421 | -4.981 | -3.114 | -3.522 | -2.053 | -4.282 | -4.075 | -4.187 | -4.981 | -3.524 | 66315     | SENP7   | NM_001304503_16_+1 |
| Gm4737  | -1.851 | 3.939  | -0.057 | 4.744  | -0.028 | 4.222  | -0.354 | 4.396  | 0.112  | 3.854  | 11615     | NA      | NM_001304528_16_-1 |
| Slc9a8  | 2.101  | 1.605  | 2.733  | 2.762  | 2.427  | 2.220  | 1.482  | 1.247  | 1.471  | 1.213  | 77031     | SLC9A8  | NM_001304540_2_+1  |
| Slc9a8  | -4.694 | -1.886 | -0.533 | -3.663 | -0.707 | -2.280 | -1.898 | -1.726 | -0.850 | -1.369 | 77031     | SLC9A8  | NM_001304542_2_+1  |
| Pakap   | -4.353 | -4.171 | -4.456 | -3.323 | -4.797 | -4.958 | -4.562 | -4.941 | -4.981 | -4.916 | 677884    | NA      | NM_001304544_4_+1  |
| Stil    | -4.900 | -4.823 | -0.383 | -3.516 | 0.636  | -0.497 | 0.443  | -1.698 | -0.614 | -1.437 | 20460     | STIL    | NM_001304551_4_+1  |
| Stil    | -4.981 | -4.981 | -3.002 | -4.822 | -1.519 | -2.780 | -4.575 | -4.577 | -4.719 | -4.890 | 20460     | STIL    | NM_001304553_4_+1  |
| Stil    | -4.981 | -4.873 | -3.502 | -0.573 | -2.964 | -1.951 | -2.173 | -2.504 | -4.769 | -0.931 | 20460     | STIL    | NM_001304555_4_+1  |
| Stil    | -2.925 | -1.347 | -1.960 | -3.984 | -2.333 | -3.204 | -2.729 | -1.802 | -4.967 | -4.925 | 20460     | STIL    | NM_001304559_4_+1  |
| Vezt    | 0.403  | -0.355 | -2.787 | -3.110 | -4.605 | -2.693 | -3.159 | -3.346 | -4.864 | -4.300 | 215008    | VEZT    | NM_001304572_10_-1 |
| Arf2    | 4.421  | 4.783  | 4.717  | 4.699  | 5.084  | 5.127  | 5.415  | 5.906  | 6.655  | 6.544  | 11841     | NA      | NM_001304574_11_+1 |
| Vezt    | 2.174  | 2.368  | 2.200  | 1.690  | 0.283  | 1.013  | 1.004  | 0.812  | 1.218  | 1.905  | 215008    | VEZT    | NM_001304575_10_-1 |
| Atp5f1  | -1.394 | -4.657 | -1.492 | -4.222 | -1.820 | -2.315 | -3.919 | -4.555 | -4.874 | -2.064 | 11950     | ATP5F1  | NM_001304719_3_-1  |
| Vezt    | -4.800 | -2.056 | -0.423 | 0.672  | -1.812 | -0.525 | -3.266 | -2.287 | 0.073  | 1.651  | 215008    | VEZT    | NM_001304720_10_-1 |
| Entpd1  | -2.515 | 0.091  | -1.407 | -4.402 | -1.674 | -0.969 | -1.975 | -4.499 | -3.052 | 0.007  | 12495     | ENTPD1  | NM_001304721_19_+1 |
| Mrln    | -4.981 | -4.981 | -4.912 | -4.912 | -4.538 | -4.241 | -2.955 | -4.174 | -4.981 | -3.853 | 69563     | NA      | NM_001304739_10_+1 |
| Clk4    | 5.004  | 5.014  | 3.492  | 3.655  | 3.686  | 4.042  | 3.611  | 3.738  | 3.861  | 3.935  | 12750     | CLK4    | NM_001304744_11_+1 |
| Csk     | 4.788  | 4.676  | 3.232  | 4.370  | 5.300  | 5.178  | 4.842  | 4.972  | 4.067  | 4.177  | 12988     | CSK     | NM_001304761_9_-1  |
| Pex26   | 0.169  | -2.113 | 0.461  | 0.485  | 0.526  | -0.997 | 0.020  | -1.107 | 0.464  | 0.840  | 74043     | PEX26   | NM_001304773_6_+1  |
| Pex26   | -2.056 | -0.124 | 1.549  | -0.021 | -0.712 | -1.138 | -1.101 | -1.979 | 0.918  | -0.658 | 74043     | PEX26   | NM_001304774_6_+1  |
| Hdgfrp2 | 3.816  | 3.574  | 3.409  | 3.190  | 3.634  | 3.415  | 3.326  | 3.442  | 3.861  | 2.875  | 15193     | HDGFRP2 | NM_001304784_17_+1 |
| Hdgfrp2 | 3.125  | 3.281  | 3.042  | 3.188  | 3.521  | 3.104  | 3.326  | 2.952  | 2.099  | 2.664  | 15193     | HDGFRP2 | NM_001304785_17_+1 |
| Maff    | -1.356 | -1.514 | -4.087 | -2.393 | -1.363 | -0.770 | -3.541 | -3.405 | -2.016 | -2.716 | 17133     | MAFF    | NM_001304830_15_+1 |
| Maff    | -1.789 | -0.239 | -0.630 | 0.013  | 0.983  | 1.760  | 0.305  | -0.386 | -2.389 | -4.556 | 17133     | MAFF    | NM_001304831_15_+1 |
| Maff    | -4.653 | -4.410 | -1.118 | -0.357 | 0.999  | 1.859  | 0.087  | -4.079 | -2.183 | -4.919 | 17133     | MAFF    | NM_001304832_15_+1 |
| Oprm1   | -4.981 | -4.981 | -4.981 | -4.981 | -4.981 | -4.981 | -4.981 | -4.981 | -4.981 | -4.981 | 18390     | OPRM1   | NM_001304950_10_+1 |
| Oprm1   | -4.981 | -4.981 | -4.304 | -4.954 | -3.994 | -4.974 | -4.958 | -4.941 | -3.167 | -4.981 | 18390     | OPRM1   | NM_001304955_10_+1 |
| Nfkbie  | 3.649  | 2.120  | 3.323  | 1.250  | 3.975  | 1.362  | 3.613  | 1.427  | 2.805  | 0.490  | 18037     | NFKBIE  | NM_001304956_17_+1 |
| Pou6f1  | 1.654  | 2.366  | -0.790 | -2.083 | 0.796  | -0.398 | 0.165  | -1.219 | -1.664 | -1.622 | 19009     | POU6F1  | NM_001304965_15_-1 |
| Ppp3cc  | 0.492  | -1.666 | -4.786 | -1.017 | -2.529 | -3.256 | -4.276 | -3.688 | -4.708 | -4.792 | 19057     | PPP3CC  | NM_001304991_14_-1 |
| Ppp3cc  | -0.600 | -1.183 | -4.787 | -3.064 | -3.445 | -2.673 | -4.882 | -3.544 | -4.739 | -4.937 | 19057     | PPP3CC  | NM_001304992_14_-1 |
| Rab5c   | 0.308  | 0.557  | 0.180  | -2.212 | 0.157  | -1.231 | 0.190  | -0.852 | 0.772  | -0.097 | 19345     | RAB5C   | NM_001305003_11_-1 |
| Spef2   | 0.604  | 0.781  | -4.342 | -4.707 | -3.035 | -0.935 | -4.761 | -4.324 | -1.909 | -1.501 | 320277    | SPEF2   | NM_001305042_15_-1 |
| Spef2   | 1.416  | 1.869  | -4.970 | -2.320 | -1.325 | -0.808 | -2.216 | -2.064 | -1.554 | -0.919 | 320277    | SPEF2   | NM_001305044_15_-1 |
| Uap1    | -0.428 | 0.356  | -1.604 | -2.230 | -3.399 | -3.497 | -1.070 | -3.802 | -0.732 | -4.881 | 107652    | UAP1    | NM_001305045_1_-1  |
| Uap1    | 5.351  | 5.515  | 5.959  | 6.071  | 6.043  | 6.138  | 5.935  | 5.664  | 6.040  | 5.227  | 107652    | UAP1    | NM_001305046_1_-1  |
| Tex35   | -4.981 | -4.981 | -4.981 | -4.981 | -4.981 | -4.981 | -4.981 | -4.981 | -4.981 | -4.981 | 73435     | TEX35   | NM_001305061_1_-1  |

|               |        |        |        |        |        |        |        |        |        |        |           |               |                         |
|---------------|--------|--------|--------|--------|--------|--------|--------|--------|--------|--------|-----------|---------------|-------------------------|
| Tex35         | -4.199 | -1.200 | -4.981 | -4.981 | -4.968 | -4.745 | -4.970 | -4.976 | -4.981 | -4.981 | 73435     | TEX35         | NM_001305062_1_-_1      |
| Gm14296       | 1.464  | 1.165  | -0.013 | 0.205  | 0.030  | 0.205  | -0.783 | -0.889 | -1.379 | -1.073 | 102639598 | ZNF559-ZNF177 | NM_001305132_2_+_1      |
| Gm14296       | 0.743  | 0.952  | 0.281  | -0.012 | -1.213 | -0.646 | -0.112 | -1.663 | -1.379 | -0.175 | 102639598 | ZNF559-ZNF177 | NM_001305132_dup1_2_-_1 |
| Gm14296       | -0.648 | -0.214 | -1.960 | -1.374 | -1.319 | -0.644 | -1.515 | -1.477 | -2.588 | -2.544 | 102639598 | ZNF559-ZNF177 | NM_001305133_2_+_1      |
| Gm14296       | -0.551 | -0.465 | -2.183 | -1.205 | -2.354 | -1.709 | -1.467 | -1.600 | -2.588 | -1.365 | 102639598 | ZNF559-ZNF177 | NM_001305133_dup1_2_-_1 |
| 2210418010Rik | 1.464  | 1.165  | -0.013 | 0.205  | 0.030  | 0.205  | -0.783 | -0.889 | -1.379 | -1.073 | 100504263 | NA            | NM_001305136_2_+_1      |
| 2210418010Rik | 0.743  | 0.952  | 0.281  | -0.012 | -1.213 | -0.646 | -0.112 | -1.663 | -1.379 | -0.175 | 100504263 | NA            | NM_001305136_dup1_2_-_1 |
| 2210418010Rik | -0.648 | -0.214 | -1.960 | -1.374 | -1.319 | -0.644 | -1.515 | -1.477 | -2.588 | -2.544 | 100504263 | NA            | NM_001305137_2_+_1      |
| 2210418010Rik | -0.551 | -0.465 | -2.183 | -1.205 | -2.354 | -1.709 | -1.467 | -1.600 | -2.588 | -1.365 | 100504263 | NA            | NM_001305137_dup1_2_-_1 |
| 4930512M02Rik | -4.981 | -4.981 | -3.406 | -4.040 | -3.724 | -3.978 | -3.581 | -4.589 | -4.981 | -4.981 | 102631730 | NA            | NM_001305143_11_-_1     |
| Pecam1        | 3.781  | 2.866  | 3.353  | 3.829  | 3.358  | 4.085  | 1.404  | 3.809  | -0.564 | 1.551  | 18613     | PECAM1        | NM_001305157_11_-_1     |
| Pecam1        | -1.070 | 1.550  | 0.625  | 0.611  | 0.938  | -2.162 | 1.640  | 0.340  | -4.108 | -0.669 | 18613     | PECAM1        | NM_001305158_11_-_1     |
| Cd320         | -2.147 | -4.670 | -4.736 | -4.952 | -4.923 | -4.398 | -3.883 | -4.899 | -4.791 | -4.919 | 54219     | CD320         | NM_001305169_17_+_1     |
| Plekha7       | -0.648 | -3.370 | -2.926 | -4.666 | -2.227 | -1.966 | -3.249 | -2.452 | -4.981 | -4.958 | 233765    | PLEKHA7       | NM_001305185_7_-_1      |
| Plekha7       | -4.136 | -3.698 | -4.612 | -4.857 | -4.788 | -2.378 | -4.964 | -4.969 | -4.981 | -4.964 | 233765    | PLEKHA7       | NM_001305186_7_-_1      |
| Plekha7       | 1.380  | 2.448  | -1.292 | -1.469 | -0.744 | -1.420 | -3.507 | -2.972 | -2.434 | -3.098 | 233765    | PLEKHA7       | NM_001305189_7_-_1      |
| Clock         | 0.193  | -3.174 | 0.608  | -0.753 | -0.751 | -0.983 | -0.703 | -0.947 | 3.362  | 3.213  | 12753     | CLOCK         | NM_001305222_5_-_1      |
| Rnf25         | 2.462  | 3.133  | 2.189  | 1.269  | 2.010  | 1.659  | 1.528  | 1.981  | 2.512  | 2.483  | 57751     | RNF25         | NM_001305230_1_-_1      |
| Fam134a       | 0.769  | 2.391  | 1.077  | 1.378  | 0.875  | 1.935  | 2.333  | 2.552  | 1.917  | 3.020  | 227298    | FAM134A       | NM_001305231_1_+_1      |
| Fam134a       | 3.623  | 3.783  | 2.239  | 2.879  | 3.002  | 2.849  | 3.576  | 2.445  | 2.972  | 3.375  | 227298    | FAM134A       | NM_001305232_1_+_1      |
| Dtl           | -2.632 | -3.005 | -3.953 | -4.764 | -2.026 | -0.583 | -4.298 | -3.153 | -2.624 | -4.817 | 76843     | DTL           | NM_001305233_1_-_1      |
| Psmf1         | 0.128  | -0.044 | -2.204 | -2.794 | -1.926 | -3.444 | -1.731 | -1.758 | -0.531 | -1.751 | 228769    | PSMF1         | NM_001305244_2_-_1      |
| Api5          | 4.465  | 4.486  | 5.924  | 5.826  | 5.757  | 5.839  | 6.059  | 6.286  | 7.272  | 7.425  | 11800     | API5          | NM_001305258_2_-_1      |
| Mcm10         | -3.700 | -4.751 | -1.017 | -3.259 | -1.164 | -2.166 | -2.113 | -2.875 | -1.014 | -2.051 | 70024     | MCM10         | NM_001305259_2_-_1      |
| Nub1          | 4.903  | 4.365  | 4.972  | 3.946  | 5.244  | 4.587  | 4.506  | 4.500  | 5.210  | 4.637  | 53312     | NUB1          | NM_001305264_4_+_1      |
| Rngtt         | -0.641 | -4.299 | -2.528 | -1.822 | -4.455 | -0.914 | -2.668 | -3.415 | -4.543 | 0.541  | 24018     | RNGTT         | NM_001305273_4_+_1      |
| Cnr2          | 1.015  | -1.679 | 4.195  | 4.512  | 0.725  | 2.533  | 3.082  | 3.987  | 2.257  | 2.242  | 12802     | CNR2          | NM_001305278_4_+_1      |
| Pigo          | 2.529  | 3.702  | 3.550  | 3.706  | 3.313  | 3.952  | 3.255  | 3.690  | 3.283  | 3.493  | 56703     | PIGO          | NM_001305386_4_-_1      |
| Pigo          | -4.581 | -4.257 | -2.503 | -3.112 | -4.734 | -4.903 | -4.428 | -4.943 | -4.405 | -4.713 | 56703     | PIGO          | NM_001305387_4_-_1      |
| E2f2          | -2.784 | -0.230 | 1.479  | 2.475  | 4.487  | 4.262  | 4.357  | 3.266  | 5.424  | 3.783  | 242705    | E2F2          | NM_001305399_4_+_1      |
| Mad2l2        | 2.441  | 0.438  | 0.419  | -3.467 | 1.518  | 0.759  | 0.807  | -0.787 | -0.466 | -2.507 | 71890     | MAD2L2        | NM_001305420_4_+_1      |
| Stra6l        | -4.533 | -4.298 | 1.456  | 1.528  | 3.696  | 4.113  | 2.279  | 1.311  | -4.743 | -4.953 | 74152     | NA            | NM_001305421_4_+_1      |
| Tmco4         | 1.992  | 1.016  | 2.342  | 1.975  | 1.980  | 2.153  | 2.441  | 2.090  | 1.747  | 0.003  | 77056     | TMCO4         | NM_001305423_4_+_1      |
| Tardbp        | 2.009  | 2.741  | 1.861  | 2.694  | 1.779  | 2.502  | 1.505  | 1.769  | 1.129  | 1.948  | 230908    | TARDBP        | NM_001305425_4_-_1      |
| Akna          | 1.297  | 2.169  | 4.826  | 4.190  | 5.697  | 4.258  | 5.491  | 4.262  | 5.906  | 5.471  | 100182    | AKNA          | NM_001305432_4_-_1      |
| Spo11         | -0.199 | -4.981 | -3.072 | -2.329 | -2.837 | -4.785 | -2.984 | -4.582 | -4.510 | -4.981 | 26972     | SPO11         | NM_001305434_2_+_1      |
| Pter          | -3.472 | -2.410 | -2.423 | -2.581 | -4.735 | -4.097 | -4.931 | -3.557 | -4.873 | -2.582 | 19212     | PTER          | NM_001305436_2_+_1      |
| Pter          | -0.660 | -3.215 | 1.367  | 2.906  | 0.606  | 1.288  | 1.556  | 1.825  | 0.119  | 1.643  | 19212     | PTER          | NM_001305437_2_+_1      |
| Spry1         | -1.720 | -3.573 | -3.173 | -0.549 | -0.543 | -3.571 | -1.839 | -1.624 | -1.277 | -0.635 | 24063     | SPRY1         | NM_001305440_3_+_1      |
| Spry1         | -3.153 | 3.164  | -0.562 | -0.028 | -0.276 | 0.165  | -2.184 | -1.173 | 0.080  | -0.428 | 24063     | SPRY1         | NM_001305441_3_+_1      |
| Spry1         | 0.280  | -3.139 | -1.764 | -0.647 | -2.432 | -4.479 | -1.131 | -0.448 | -4.433 | -0.760 | 24063     | SPRY1         | NM_001305442_3_+_1      |
| Bglap3        | 2.930  | 2.716  | -4.781 | -3.810 | -4.981 | -4.981 | -4.937 | -3.554 | -4.981 | -4.981 | 12095     | BGLAP         | NM_001305448_3_-_1      |
| Bglap3        | -3.225 | 1.361  | -4.979 | -4.793 | -4.929 | -4.929 | -4.962 | -4.972 | -4.981 | -4.981 | 12095     | BGLAP         | NM_001305449_3_-_1      |
| Bglap3        | -4.779 | -4.245 | -3.909 | -4.009 | -4.333 | -4.951 | -4.952 | -4.932 | -4.981 | -4.981 | 12095     | BGLAP         | NM_001305450_3_-_1      |
| Gpr61         | -4.981 | -4.981 | -3.011 | -3.843 | -1.934 | -2.539 | -3.148 | -3.319 | -4.981 | -4.981 | 229714    | GPR61         | NM_001305461_3_-_1      |
| Apoa2         | -4.981 | -4.981 | -4.486 | -4.958 | -3.353 | -4.818 | -3.406 | -4.816 | -4.817 | -4.797 | 11807     | APOA2         | NM_001305549_1_+_1      |
| Apoa2         | -4.981 | -4.981 | -3.660 | -4.965 | -4.249 | -4.687 | -4.640 | -4.315 | -4.489 | -4.469 | 11807     | APOA2         | NM_001305550_1_+_1      |
| Apoa2         | -4.981 | -4.981 | -4.030 | -4.012 | -4.970 | -4.878 | -2.293 | -4.411 | -4.190 | -3.855 | 11807     | APOA2         | NM_001305585_1_+_1      |
| Hars2         | 1.695  | 2.001  | 1.147  | 1.250  | 1.451  | 0.894  | 1.723  | 1.361  | 0.701  | 1.152  | 70791     | HARS2         | NM_001305627_18_+_1     |
| Cenpi         | 0.022  | -0.746 | -2.979 | -0.675 | 1.101  | 0.191  | 1.242  | 0.729  | 0.211  | -1.391 | 102920    | CENPI         | NM_001305631_X_+_1      |
| Pla2g4a       | -4.341 | -3.838 | -4.184 | -3.109 | -4.861 | -4.937 | -4.106 | -4.917 | -1.749 | -4.773 | 18783     | PLA2G4A       | NM_001305632_1_-_1      |
| Kifap3        | 3.105  | 3.431  | 3.139  | 3.042  | 2.283  | 3.275  | 2.918  | 2.833  | 2.617  | 3.814  | 16579     | KIFAP3        | NM_001305643_1_+_1      |
| Bcs1l         | 3.864  | 3.683  | 2.625  | 2.945  | 2.342  | 2.293  | 2.260  | 2.159  | 2.051  | 2.497  | 66821     | BCS1L         | NM_001305652_1_+_1      |
| Themis        | -4.981 | -4.981 | -4.885 | -2.843 | -4.242 | -4.841 | -4.366 | -4.826 | -4.366 | -4.981 | 210757    | THEMIS        | NM_001305663_10_+_1     |
| Vps28         | 5.610  | -1.465 | 3.628  | -0.870 | 3.629  | -1.952 | 4.031  | -2.569 | 3.859  | -2.235 | 66914     | VPS28         | NM_001305668_15_-_1     |
| Glis3         | 0.631  | 0.035  | -3.509 | -2.501 | -2.169 | -2.922 | -2.263 | -1.135 | -0.492 | -0.192 | 226075    | GLIS3         | NM_001305671_19_-_1     |
| Wdr44         | 1.903  | 1.711  | 2.476  | 1.917  | 2.394  | 1.763  | 2.484  | 1.836  | 2.424  | 2.022  | 72404     | WDR44         | NM_001305675_X_+_1      |
| Usf1          | 5.291  | 5.734  | 5.169  | 5.280  | 5.558  | 5.895  | 5.603  | 5.733  | 6.372  | 5.920  | 22278     | USF1          | NM_001305676_1_+_1      |
| Usf1          | 1.379  | 0.811  | 1.936  | -2.425 | 2.646  | 0.569  | 1.883  | -1.171 | 3.167  | 0.480  | 22278     | USF1          | NM_001305677_1_+_1      |
| Usf1          | 4.763  | 4.700  | 4.528  | 3.984  | 4.533  | 4.716  | 4.359  | 4.313  | 5.321  | 5.142  | 22278     | USF1          | NM_001305678_1_+_1      |
| F9            | -4.981 | -4.981 | -2.727 | -3.987 | -4.887 | -4.676 | -2.540 | -2.381 | -2.704 | -4.970 | 14071     | F9            | NM_001305797_X_+_1      |
| Midn          | 1.697  | 0.333  | 0.709  | 0.496  | 0.833  | 1.220  | 1.766  | 1.148  | 1.456  | 1.455  | 59090     | MIDN          | NM_001305798_10_+_1     |
| Midn          | -3.173 | -0.183 | -0.319 | -4.552 | -2.393 | -3.599 | -2.396 | -4.790 | -0.899 | -4.654 | 59090     | MIDN          | NM_001305799_10_+_1     |
| Spc25         | -4.981 | -1.877 | -0.737 | -4.844 | -1.296 | -1.371 | -2.162 | -1.621 | -1.667 | -1.648 | 66442     | SPC25         | NM_001305800_2_-_1      |
| Ttpal         | -2.096 | 0.053  | 1.702  | 0.972  | 0.365  | -0.018 | -0.357 | 1.056  | 2.926  | 1.359  | 76080     | TTPAL         | NM_001305803_2_+_1      |
| Pank4         | -0.498 | -2.275 | -4.137 | -3.765 | -2.021 | -4.947 | -4.845 | -4.307 | -4.850 | -2.494 | 269614    | PANK4         | NM_001305804_4_+_1      |
| Ntng2         | -4.250 | -4.241 | -3.949 | -2.704 | -4.744 | -1.442 | -1.720 | -0.902 | -2.238 | -0.442 | 171171    | NTNG2         | NM_001305805_2_-_1      |
| Apoe          | 0.577  | -3.480 | -1.711 | -2.495 | -1.049 | -4.735 | 0.955  | -0.159 | 2.607  | -0.814 | 11816     | APOE          | NM_001305819_7_-_1      |
| Ttyh1         | -2.804 | -2.417 | -4.981 | -4.978 | -4.939 | -4.673 | -4.966 | -4.973 | -4.976 | -4.981 | 57776     | TTYH1         | NM_001305822_7_+_1      |
| Apoe          | 2.100  | -4.473 | 0.025  | -3.391 | 0.681  | -1.833 | 1.430  | 0.678  | 2.568  | 0.224  | 11816     | APOE          | NM_001305843_7_-_1      |
| Apoe          | 5.264  | 1.626  | 5.887  | 2.385  | 5.622  | 2.033  | 8.150  | 6.935  | 9.842  | 6.237  | 11816     | APOE          | NM_001305844_7_-_1      |
| Limk1         | 1.942  | 2.592  | 3.740  | 3.383  | 2.351  | 2.524  | 2.564  | 2.563  | 3.496  | 3.544  | 16885     | LIMK1         | NM_001305875_5_-_1      |
| Bckdhh        | 2.746  | 5.129  | 2.465  | 4.473  | 2.695  | 4.425  | 2.161  | 4.270  | 1.447  | 2.785  | 12040     | BCKDHB        | NM_001305935_9_+_1      |
| Kctd6         | -2.226 | -0.529 | -0.032 | -0.723 | -0.936 | -1.374 | 0.123  | 0.299  | 0.614  | 0.751  | 71393     | KCTD6         | NM_001305936_14_+_1     |

|                 |        |        |        |        |        |        |        |        |        |        |           |          |                     |
|-----------------|--------|--------|--------|--------|--------|--------|--------|--------|--------|--------|-----------|----------|---------------------|
| Kctd6           | 3.251  | 3.597  | 3.380  | 3.440  | 2.171  | 1.602  | 2.788  | 2.597  | 3.114  | 3.090  | 71393     | KCTD6    | NM_001305937_14_+_1 |
| Gdpd2           | -4.981 | -2.239 | -4.973 | -3.676 | -4.438 | -4.907 | -2.708 | -4.957 | -1.124 | -2.713 | 71584     | GDPD2    | NM_001305941_X_+_1  |
| Diaph1          | 2.669  | 2.705  | 1.319  | 0.321  | 2.197  | 1.470  | 2.006  | 2.496  | 3.061  | 3.703  | 13367     | DIAPH1   | NM_001305980_18_-_1 |
| Diaph1          | 1.717  | -0.343 | -3.901 | -2.163 | -2.469 | -1.147 | -0.973 | -2.007 | -3.835 | -4.070 | 13367     | DIAPH1   | NM_001305981_18_-_1 |
| Coasy           | 5.151  | 5.195  | 5.114  | 5.294  | 4.490  | 4.500  | 4.421  | 4.698  | 4.860  | 4.936  | 71743     | COASY    | NM_001305982_11_+_1 |
| Cnpy3           | 0.467  | -4.476 | -0.436 | -1.147 | -2.189 | -2.105 | -1.409 | -2.332 | -0.676 | -1.520 | 72029     | CNPY3    | NM_001305988_17_-_1 |
| Cnpy3           | 1.288  | 0.819  | 1.925  | -0.456 | 2.325  | 0.775  | 1.924  | -1.316 | 2.332  | 0.772  | 72029     | CNPY3    | NM_001305989_17_-_1 |
| Cnpy3           | 1.262  | 0.608  | 1.629  | 0.884  | 1.459  | 0.184  | 1.191  | -0.422 | 1.854  | -0.302 | 72029     | CNPY3    | NM_001305990_17_-_1 |
| Ggt1            | -0.728 | -0.106 | -4.961 | -4.480 | -3.863 | -3.943 | -2.324 | -0.583 | -2.954 | -1.542 | 14598     | GGT1     | NM_001305992_10_+_1 |
| Spsb2           | 4.052  | 4.368  | -2.130 | -0.871 | 0.077  | -1.873 | -3.061 | -2.325 | -2.519 | -4.942 | 14794     | SPSB2    | NM_001306050_6_+_1  |
| Spsb2           | 0.893  | 0.344  | -4.704 | -4.870 | -4.911 | -4.974 | -4.613 | -4.856 | -4.790 | -4.926 | 14794     | SPSB2    | NM_001306051_6_+_1  |
| Spsb2           | 2.448  | 1.962  | 0.763  | 1.136  | 1.154  | 0.184  | 0.789  | 0.214  | 1.832  | 1.399  | 14794     | SPSB2    | NM_001306052_6_+_1  |
| Spsb2           | 1.535  | 2.449  | -0.426 | -0.511 | -0.157 | -0.287 | -0.673 | -0.155 | 1.005  | 0.374  | 14794     | SPSB2    | NM_001306053_6_+_1  |
| Adipor1         | 3.783  | 3.308  | 4.488  | 5.148  | 4.153  | 5.061  | 5.605  | 6.432  | 7.358  | 7.515  | 72674     | ADIPOR1  | NM_001306069_1_+_1  |
| Itga3           | -3.055 | -4.818 | -0.825 | 0.704  | -3.144 | -2.900 | -3.600 | -0.893 | -3.280 | -4.389 | 16400     | ITGA3    | NM_001306071_11_-_1 |
| Rptor           | 2.558  | 0.569  | 0.985  | 0.915  | -0.819 | -0.176 | 1.405  | 1.328  | 1.822  | -1.089 | 74370     | RPTOR    | NM_001306081_11_+_1 |
| Dnmbp           | 0.409  | 1.145  | 2.604  | 2.264  | 0.144  | -0.727 | 0.545  | -0.875 | 0.148  | 0.511  | 71972     | DNMBP    | NM_001306088_19_-_1 |
| Sh2b3           | 3.214  | 2.671  | 2.916  | 2.705  | 2.831  | 1.793  | 2.445  | 2.009  | 1.462  | 2.369  | 16923     | SH2B3    | NM_001306126_5_-_1  |
| Sh2b3           | 3.211  | 0.216  | 3.436  | 3.134  | 2.613  | 3.346  | 3.150  | 2.950  | 5.349  | 5.534  | 16923     | SH2B3    | NM_001306127_5_-_1  |
| Sh2b3           | 2.792  | 2.858  | 1.836  | 1.909  | 2.976  | 1.941  | 2.820  | 2.370  | -1.479 | 0.702  | 16923     | SH2B3    | NM_001306128_5_-_1  |
| Mbd3            | 6.627  | 6.649  | 5.985  | 6.162  | 5.855  | 5.820  | 5.537  | 5.628  | 4.817  | 4.689  | 17192     | MBD3     | NM_001306143_10_-_1 |
| Car12           | -2.497 | -3.461 | -3.300 | -1.541 | -3.537 | -1.675 | -2.546 | -1.130 | -3.523 | -4.981 | 76459     | CA12     | NM_001306148_9_+_1  |
| Itga3           | -2.206 | -3.040 | -0.061 | 0.250  | -3.285 | -4.273 | -3.171 | -2.525 | -4.365 | -4.661 | 16400     | ITGA3    | NM_001306162_11_-_1 |
| Ccdc116         | -1.758 | -1.293 | 0.019  | -0.613 | -0.345 | 0.176  | -1.198 | -2.700 | -1.890 | -3.064 | 76872     | CCDC116  | NM_001306169_16_-_1 |
| Scfd1           | -0.651 | 0.272  | -0.080 | 0.266  | -0.138 | -0.735 | -0.143 | -0.178 | 0.683  | 0.225  | 76983     | SCFD1    | NM_001306178_12_+_1 |
| Mmp11           | -0.620 | 0.933  | -3.711 | -3.039 | -4.133 | -4.223 | -4.957 | -4.375 | -4.981 | -3.411 | 17385     | MMP11    | NM_001306184_10_-_1 |
| Ints7           | 0.983  | 1.219  | -0.099 | 0.769  | 0.570  | -0.357 | 1.198  | 0.020  | 1.247  | 1.618  | 77065     | INTS7    | NM_001306203_1_+_1  |
| Ints7           | 0.081  | -1.751 | 0.693  | -0.553 | -1.112 | -3.446 | 1.641  | -0.370 | 0.410  | -0.914 | 77065     | INTS7    | NM_001306204_1_+_1  |
| Mvk             | 2.992  | 2.435  | 0.652  | 0.396  | 1.203  | 0.790  | 0.423  | 0.465  | 0.284  | 0.726  | 17855     | MVK      | NM_001306205_5_+_1  |
| Trappc6b        | -1.684 | -2.495 | -1.616 | -4.275 | -1.663 | -2.978 | -3.919 | -4.147 | -0.779 | -2.893 | 78232     | TRAPPC6B | NM_001306217_12_-_1 |
| Trappc6b        | 2.382  | 2.269  | 1.149  | 1.244  | 0.858  | 1.250  | 1.402  | 1.289  | 1.492  | 1.012  | 78232     | TRAPPC6B | NM_001306218_12_-_1 |
| Nfkbiib         | 7.039  | 6.947  | 6.753  | 6.843  | 6.431  | 6.512  | 6.437  | 6.449  | 5.973  | 5.860  | 18036     | NFKBIB   | NM_001306222_7_-_1  |
| Creb3l4         | -3.527 | -4.766 | -3.906 | -4.862 | -4.874 | -4.856 | -4.939 | -4.959 | -2.969 | -4.927 | 78284     | CREB3L4  | NM_001307934_3_-_1  |
| Creb3l4         | -2.647 | -2.681 | -2.832 | -3.662 | -2.925 | -4.155 | -4.855 | -5.010 | -1.791 | -1.710 | 78284     | CREB3L4  | NM_001307935_3_-_1  |
| Nr4a3           | -4.981 | -4.981 | -3.046 | -2.063 | -0.292 | -0.913 | -2.614 | -3.924 | -3.973 | -2.113 | 18124     | NR4A3    | NM_001307989_4_+_1  |
| Trim68          | 0.671  | 0.566  | -0.051 | 2.014  | 0.331  | 1.681  | 0.964  | 0.638  | 0.721  | -3.712 | 101700    | TRIM68   | NM_001307998_7_-_1  |
| Ttyh3           | -2.111 | 0.875  | -0.201 | -0.027 | 0.869  | 0.368  | 2.031  | 0.544  | 0.911  | 1.944  | 78339     | TTYH3    | NM_001308040_5_-_1  |
| Brd9            | 2.761  | 3.183  | 1.829  | 1.400  | 2.751  | 2.322  | 2.982  | 1.899  | 2.219  | 2.609  | 105246    | BRD9     | NM_001308041_13_+_1 |
| Gpr108          | 4.992  | 4.999  | 4.439  | 4.574  | 4.168  | 4.566  | 4.930  | 4.761  | 5.595  | 5.479  | 78308     | GPR108   | NM_001308072_17_-_1 |
| Gpr108          | 0.392  | -3.508 | 0.013  | 0.226  | -0.119 | -0.428 | 0.435  | 0.259  | 1.070  | 1.288  | 78308     | GPR108   | NM_001308074_17_-_1 |
| Smim4           | 5.621  | 5.111  | 4.094  | 3.988  | 3.749  | 3.975  | 4.459  | 4.312  | 4.664  | 3.826  | 66487     | NA       | NM_001308091_14_-_1 |
| Nadsyn1         | 0.794  | 1.945  | 0.970  | 1.613  | 2.502  | 2.482  | 2.459  | 1.473  | 1.477  | 1.814  | 78914     | NADSYN1  | NM_001308095_7_-_1  |
| Tnfrsf23        | -2.548 | -4.981 | -0.664 | -0.243 | -1.612 | -1.025 | -1.780 | -2.983 | 0.750  | -0.354 | 79201     | NA       | NM_001308111_7_-_1  |
| Zcchc4          | 2.784  | 3.090  | 4.631  | 4.541  | 3.421  | 3.961  | 2.909  | 2.645  | 3.421  | 3.156  | 78796     | ZCCHC4   | NM_001308144_5_+_1  |
| Sh3bp5l         | 0.992  | -2.097 | -3.461 | -2.389 | -2.928 | -2.298 | -3.103 | -4.575 | -3.301 | -4.272 | 79566     | SH3BP5L  | NM_001308167_11_+_1 |
| Sh3bp5l         | -3.360 | -2.634 | -1.532 | -1.295 | -4.182 | -1.752 | -0.824 | -4.493 | -3.596 | -3.971 | 79566     | SH3BP5L  | NM_001308168_11_+_1 |
| Cdk5rap3        | 2.809  | 2.449  | 1.196  | 0.590  | 1.543  | 1.535  | 1.744  | 1.577  | 1.950  | 1.388  | 80280     | CDK5RAP3 | NM_001308183_11_-_1 |
| Dnajb1          | -1.552 | -1.474 | 0.915  | 1.120  | 1.547  | 0.623  | 1.252  | -0.193 | 0.616  | 0.046  | 81489     | DNAJB1   | NM_001308227_8_+_1  |
| Stat4           | 2.691  | 1.781  | 1.177  | 1.458  | 3.603  | 1.990  | 3.344  | 2.575  | 2.653  | 2.526  | 20849     | STAT4    | NM_001308266_1_+_1  |
| Fhit            | -4.981 | -4.981 | -4.981 | -4.981 | -4.961 | -4.980 | -4.979 | -4.978 | -4.981 | -4.981 | 14198     | FHIT     | NM_001308285_14_-_1 |
| Fhit            | 4.691  | 4.485  | -0.774 | -0.794 | -0.672 | -1.387 | -0.612 | 0.749  | -0.063 | -1.968 | 14198     | FHIT     | NM_001308286_14_-_1 |
| Ggta1           | -0.778 | -1.163 | 1.146  | 1.743  | 2.537  | 1.828  | 2.119  | 2.546  | 2.817  | 2.411  | 14594     | NA       | NM_001308299_2_-_1  |
| Ggta1           | 2.585  | -3.863 | 3.861  | 3.295  | 4.215  | 4.086  | 4.316  | 3.807  | 4.024  | 3.955  | 14594     | NA       | NM_001308300_2_-_1  |
| Rnf103          | 0.263  | -4.275 | -0.721 | -3.813 | 0.522  | -2.380 | 0.062  | -2.770 | 1.078  | -0.992 | 22644     | RNF103   | NM_001308303_6_+_1  |
| Zfp51           | 3.120  | 3.250  | 2.653  | 2.899  | 2.254  | 1.872  | 2.644  | 2.956  | 1.783  | 2.984  | 22709     | ZNF761   | NM_001308323_17_+_1 |
| Enpp1           | -3.356 | -3.007 | -2.813 | 0.106  | -1.254 | -2.801 | -1.104 | -1.282 | -2.508 | -1.694 | 18605     | ENPP1    | NM_001308327_10_-_1 |
| Nek4            | 2.283  | 2.337  | 1.432  | 2.213  | 1.472  | 1.368  | 1.815  | 1.444  | 2.366  | 2.485  | 23955     | NEK4     | NM_001308328_14_+_1 |
| Enpp1           | -0.668 | -0.607 | 0.125  | -1.311 | -0.564 | -1.342 | -1.258 | -0.418 | -0.901 | -2.097 | 18605     | ENPP1    | NM_001308329_10_-_1 |
| Pparg           | -3.004 | -2.661 | 1.432  | 0.803  | -0.988 | -1.810 | 2.205  | 2.511  | 2.659  | 2.221  | 19016     | PPARG    | NM_001308352_6_+_1  |
| Pparg           | -0.937 | -1.394 | 0.717  | 2.076  | 1.210  | 0.028  | 3.520  | 3.363  | 1.025  | 2.311  | 19016     | PPARG    | NM_001308354_6_+_1  |
| Sema4f          | -2.547 | -2.967 | 1.255  | 0.723  | -0.429 | -1.089 | -1.107 | 0.000  | -4.981 | -3.093 | 20355     | SEMA4F   | NM_001308374_6_-_1  |
| Siah1b          | 1.345  | 1.406  | 2.358  | 1.880  | 1.143  | 0.500  | 0.479  | 0.630  | 0.912  | 1.137  | 20438     | NA       | NM_001308385_X_-_1  |
| Siah1b          | 0.856  | 0.124  | 2.049  | 1.568  | 1.902  | 1.417  | 1.328  | 0.320  | 0.686  | -0.101 | 20438     | NA       | NM_001308386_X_-_1  |
| 2310009A05Rik   | 6.160  | 6.566  | 4.793  | 4.653  | 4.351  | 4.366  | 5.205  | 4.776  | 4.092  | 4.417  | 66364     | NA       | NM_001308425_9_+_1  |
| Secisbp2        | -3.619 | -3.316 | -3.944 | -4.409 | -2.514 | -3.019 | -1.575 | -1.696 | -0.653 | -2.954 | 75420     | SECISBP2 | NM_001308448_13_+_1 |
| mc8-1190005i06r | -1.198 | 0.195  | -1.134 | -1.362 | -1.057 | -1.628 | -2.427 | -2.870 | -4.051 | -2.117 | 105734727 | NA       | NM_001308449_8_-_1  |
| Aldh2           | 6.102  | 5.817  | 5.306  | 5.683  | 4.397  | 4.163  | 5.299  | 6.168  | 8.080  | 7.963  | 11669     | ALDH2    | NM_001308450_5_-_1  |
| Alox5ap         | 2.650  | 2.971  | 2.533  | 1.759  | 2.683  | 1.231  | 2.298  | 2.073  | 3.660  | 3.003  | 11690     | ALOX5AP  | NM_001308462_5_+_1  |
| Smim4           | 0.899  | 0.786  | -0.275 | -2.321 | -0.279 | -1.344 | -0.720 | -0.808 | -0.314 | 0.334  | 66487     | NA       | NM_001308464_14_-_1 |
| Smim4           | -4.541 | -1.224 | -1.192 | -2.357 | -1.373 | -3.756 | -1.439 | -3.296 | -4.889 | -4.880 | 66487     | NA       | NM_001308466_14_-_1 |
| Porcn           | -4.981 | -4.981 | -2.123 | -3.269 | -4.958 | -3.405 | -3.001 | -4.050 | -4.933 | -4.976 | 53627     | PORCN    | NM_001308474_X_-_1  |
| Mtrr            | -2.270 | -1.297 | -0.705 | -0.691 | -0.114 | -2.411 | -1.031 | -0.238 | 0.225  | -4.967 | 210009    | MTRR     | NM_001308475_13_-_1 |
| Whsc1l1         | 3.108  | 3.353  | 3.309  | 2.931  | 3.878  | 3.644  | 3.676  | 3.528  | 4.226  | 3.843  | 234135    | WHSC1L1  | NM_001308481_8_+_1  |
| Whsc1l1         | 4.626  | 4.818  | 4.876  | 4.438  | 5.257  | 5.077  | 5.265  | 4.944  | 6.086  | 5.961  | 234135    | WHSC1L1  | NM_001308482_8_+_1  |

|                 |        |        |        |        |        |        |        |        |        |        |           |         |                    |
|-----------------|--------|--------|--------|--------|--------|--------|--------|--------|--------|--------|-----------|---------|--------------------|
| Cdkal1          | -2.486 | -2.273 | -1.914 | -2.910 | -2.520 | -2.239 | -2.045 | -2.363 | -1.931 | -4.002 | 68916     | CDKAL1  | NM_001308486_13_-1 |
| Asmt            | -4.981 | -4.981 | -4.973 | -4.973 | -4.932 | -4.817 | -4.981 | -4.981 | -4.981 | -4.473 | 107626    | NA      | NM_001308488_X_+1  |
| Vegfd           | 1.994  | 2.219  | -4.941 | -2.998 | -4.968 | -4.968 | -4.763 | -4.968 | -3.925 | -4.981 | 14205     | VEGFD   | NM_001308489_X_+1  |
| Nnt             | 4.948  | 5.611  | 3.695  | 5.303  | 3.956  | 5.082  | 3.902  | 5.211  | 4.120  | 5.919  | 18115     | NA      | NM_001308506_13_-1 |
| Il2rg           | 2.940  | 1.958  | 1.155  | 0.791  | 2.465  | 2.534  | 2.290  | 2.738  | 0.562  | 1.307  | 16186     | IL2RG   | NM_001308535_X_-1  |
| Aqp4            | -4.981 | -4.981 | -4.636 | -4.952 | -4.973 | -4.169 | -4.933 | -4.824 | -4.981 | -4.981 | 11829     | AQP4    | NM_001308641_18_-1 |
| Aqp4            | -4.981 | -4.981 | -4.940 | -4.977 | -4.980 | -4.968 | -4.971 | -4.959 | -4.981 | -4.981 | 11829     | AQP4    | NM_001308642_18_-1 |
| Aqp4            | -4.981 | -4.981 | -4.910 | -4.974 | -4.978 | -4.952 | -4.967 | -4.950 | -4.981 | -4.981 | 11829     | AQP4    | NM_001308643_18_-1 |
| Aqp4            | -4.981 | -4.981 | -4.893 | -4.972 | -4.978 | -4.940 | -4.965 | -4.942 | -4.981 | -4.981 | 11829     | AQP4    | NM_001308644_18_-1 |
| Aqp4            | -4.981 | -4.981 | -4.953 | -4.978 | -4.980 | -4.974 | -4.973 | -4.965 | -4.981 | -4.981 | 11829     | AQP4    | NM_001308645_18_-1 |
| Aqp4            | -4.981 | -4.981 | -4.975 | -4.980 | -4.981 | -4.981 | -4.978 | -4.975 | -4.981 | -4.981 | 11829     | AQP4    | NM_001308646_18_-1 |
| Aqp4            | -4.981 | -4.981 | -4.961 | -4.979 | -4.981 | -4.977 | -4.974 | -4.968 | -4.981 | -4.981 | 11829     | AQP4    | NM_001308647_18_-1 |
| Zfp950          | 0.875  | -4.981 | 0.692  | -1.254 | 1.100  | -0.670 | 1.020  | 0.119  | -0.489 | 0.062  | 414758    | NA      | NM_001309195_19_-1 |
| Zfp950          | 2.338  | 3.295  | 2.207  | 2.311  | 2.265  | 2.751  | 2.387  | 2.653  | 1.564  | 2.330  | 414758    | NA      | NM_001309216_19_-1 |
| Lrrc31          | -4.981 | -3.266 | -4.724 | -4.802 | -4.827 | -4.985 | -4.978 | -4.464 | -4.981 | -3.657 | 320352    | NA      | NM_001309233_3_-1  |
| Gm10037         | -4.904 | -4.981 | -4.932 | -4.978 | -4.964 | -4.980 | -4.969 | -4.979 | -4.981 | -4.981 | 102637366 | NA      | NM_001309373_13_+1 |
| Gm10037         | -1.846 | -4.981 | -3.252 | -4.982 | -2.232 | -4.776 | -3.851 | -4.977 | -3.419 | -4.981 | 102637366 | NA      | NM_001309374_13_+1 |
| Zfp141          | 3.622  | 3.169  | 3.496  | 3.602  | 2.945  | 2.981  | 2.099  | 2.967  | 2.618  | 2.993  | 434178    | NA      | NM_001309388_7_-1  |
| Zfp141          | 2.938  | 0.911  | 0.846  | -1.224 | -1.157 | -1.745 | 0.280  | -1.863 | -0.405 | -2.984 | 434178    | NA      | NM_001309389_7_-1  |
| Robo4           | -4.981 | -3.825 | -4.220 | -3.883 | -4.981 | -4.859 | -3.183 | -4.540 | -4.981 | -4.981 | 74144     | ROBO4   | NM_001309390_9_+1  |
| Pard3           | -0.199 | 0.130  | -3.923 | -4.439 | -4.820 | -4.972 | -4.519 | -4.736 | -4.981 | -4.981 | 93742     | PARD3   | NM_001309391_8_+1  |
| Pard3           | 1.828  | 2.089  | -2.914 | -3.304 | -4.469 | -4.999 | -4.968 | -4.414 | -4.981 | -4.981 | 93742     | PARD3   | NM_001309392_8_+1  |
| 2610042L04Rik   | -0.224 | -1.206 | -1.946 | -4.160 | -4.717 | 0.302  | -4.969 | -3.996 | -4.981 | -4.981 | 554327    | NA      | NM_001309398_14_+1 |
| Gm3636          | 2.426  | -1.414 | -0.206 | -4.326 | -3.577 | 1.573  | -4.952 | -4.241 | -4.981 | -4.981 | 100041151 | NA      | NM_001309401_14_-1 |
| Israa           | 0.900  | 0.977  | 0.850  | 0.602  | 0.012  | -0.070 | 1.010  | 0.430  | -0.098 | -0.927 | 100188919 | NA      | NM_001309430_14_+1 |
| Aebp2           | 1.464  | 1.549  | 1.397  | 1.512  | 3.877  | 4.178  | 2.687  | 1.628  | 1.639  | 1.816  | 11569     | AEBP2   | NM_001309436_6_+1  |
| Aebp2           | 4.134  | 3.938  | 4.410  | 4.256  | 5.880  | 5.531  | 5.635  | 4.583  | 2.939  | 3.348  | 11569     | AEBP2   | NM_001309437_6_+1  |
| Sct             | 1.054  | 0.140  | -1.317 | -2.631 | -3.676 | -4.720 | -2.690 | -3.527 | -4.981 | -4.981 | 20287     | NA      | NM_001309439_7_-1  |
| Zcchc4          | -3.627 | -1.377 | -1.167 | -1.009 | -4.416 | -4.647 | -2.742 | -1.542 | -4.476 | -4.863 | 78796     | ZCCHC4  | NM_001309445_5_+1  |
| Zfand4          | 1.678  | 0.899  | 1.741  | 0.936  | 2.343  | 1.967  | 2.114  | 1.232  | 2.883  | 2.098  | 67492     | ZFAND4  | NM_001309446_6_+1  |
| Sptan1          | -3.505 | -3.460 | -3.818 | -4.172 | -4.256 | -4.882 | -1.257 | -4.282 | 0.159  | -3.922 | 20740     | SPTAN1  | NM_001309460_2_+1  |
| Cacnb2          | -4.606 | -2.610 | -4.851 | -4.570 | -4.783 | -4.916 | -4.790 | -4.827 | -4.388 | -4.981 | 12296     | CACNB2  | NM_001309519_2_+1  |
| Speer1          | -4.981 | -4.981 | -4.960 | -4.960 | -4.935 | -4.934 | -4.899 | -4.895 | -4.981 | -4.981 | 70896     | NA      | NM_001309520_5_+1  |
| Sgsm1           | -4.981 | -4.981 | -4.445 | -4.953 | -4.886 | -4.941 | -4.950 | -4.090 | -4.190 | -4.981 | 52850     | SGSM1   | NM_001309526_5_-1  |
| Clec7a          | 1.675  | -0.531 | 5.539  | 3.191  | 6.121  | 4.819  | 8.966  | 7.747  | 9.450  | 8.695  | 56644     | CLECTA  | NM_001309637_6_-1  |
| Borcs8          | 2.792  | 2.540  | 2.601  | 2.318  | 2.227  | 1.757  | 1.953  | 1.796  | 1.285  | 1.150  | 72368     | BORCS8  | NM_001309645_8_+1  |
| Apoc2           | -2.066 | -4.981 | -3.944 | -4.354 | -4.666 | -3.862 | 1.574  | 2.484  | 4.477  | 3.800  | 11813     | APOC2   | NM_001309795_7_-1  |
| Apoc4-apoc2     | -4.854 | -4.981 | -4.172 | -4.957 | -4.959 | -4.980 | 1.089  | -2.302 | 1.530  | -1.283 | 105886299 | NA      | NM_001309799_7_-1  |
| Cox16           | 2.557  | 2.276  | 1.457  | 1.000  | 1.003  | 0.960  | 2.099  | 1.445  | 1.024  | 1.413  | 66272     | COX16   | NM_001309808_12_-1 |
| Cox16           | 4.888  | 4.804  | 4.579  | 4.600  | 4.028  | 4.384  | 4.274  | 4.326  | 3.452  | 3.383  | 66272     | COX16   | NM_001309809_12_-1 |
| Cox16           | -1.383 | -0.934 | -1.107 | -2.651 | -2.175 | -3.496 | -3.662 | -4.314 | -2.691 | -2.162 | 66272     | COX16   | NM_001309810_12_-1 |
| Synj2bp         | 1.759  | 1.496  | 1.768  | 1.175  | 1.868  | 2.271  | 1.893  | 1.566  | 0.519  | 1.208  | 24071     | SYNJ2BP | NM_001309814_12_-1 |
| Borcs8          | 1.441  | 1.074  | 2.406  | 2.359  | 2.101  | 1.125  | 1.496  | 1.495  | 0.982  | -0.213 | 72368     | BORCS8  | NM_001309841_8_+1  |
| Synj2bp-cox16   | -0.153 | -1.412 | 0.286  | 0.580  | -1.060 | -0.763 | 0.173  | -1.291 | -0.016 | 0.213  | 105940408 | NA      | NM_001309847_12_-1 |
| Synj2bp-cox16   | 0.311  | 1.199  | 2.274  | 2.704  | 0.750  | -0.199 | 0.431  | 0.265  | 0.760  | -3.659 | 105940408 | NA      | NM_001309848_12_-1 |
| Scamp3          | 5.634  | 5.535  | 4.657  | 4.721  | 4.884  | 5.038  | 4.680  | 4.992  | 4.821  | 4.703  | 24045     | SCAMP3  | NM_001309909_3_+1  |
| Scamp3          | -0.006 | -0.709 | -2.303 | -0.759 | 0.197  | -1.487 | -0.735 | -3.342 | 0.148  | -2.738 | 24045     | SCAMP3  | NM_001309910_3_+1  |
| Clk2-scamp3     | 2.706  | 2.475  | 3.093  | 3.409  | 3.109  | 3.007  | 2.543  | 3.366  | 3.988  | 3.956  | 105943584 | NA      | NM_001310016_3_+1  |
| Clk2-scamp3     | 2.037  | 2.263  | 1.252  | 0.985  | 1.354  | 0.835  | 0.910  | 1.114  | 2.232  | 2.071  | 105943584 | NA      | NM_001310017_3_+1  |
| Gm5861          | -4.981 | -4.981 | -4.958 | -4.076 | -4.981 | -4.981 | -4.079 | -1.591 | -4.981 | -4.981 | 545728    | NA      | NM_001310021_5_+1  |
| Clcf1           | -4.250 | -4.191 | -3.301 | -4.764 | -2.142 | -3.186 | -3.108 | -3.735 | -4.444 | -4.754 | 56708     | CLCF1   | NM_001310038_19_+1 |
| Clcf1           | 1.284  | -0.958 | 0.341  | 0.625  | 0.550  | 2.220  | 1.563  | 1.261  | 0.308  | 1.391  | 56708     | CLCF1   | NM_001310039_19_+1 |
| 10045n01rik-mef | -4.886 | -4.981 | -4.939 | -4.970 | -4.974 | -4.980 | -4.961 | -4.979 | -4.972 | -4.969 | 105980076 | NA      | NM_001310055_8_+1  |
| Atf7            | -0.532 | 4.069  | 2.938  | 1.757  | 1.946  | 1.268  | 2.440  | 3.314  | 3.725  | 3.817  | 223922    | ATF7    | NM_001310066_15_-1 |
| Atf7            | 4.337  | 3.256  | 3.778  | 3.799  | 4.074  | 3.888  | 4.372  | 4.024  | 4.731  | 5.205  | 223922    | ATF7    | NM_001310067_15_-1 |
| Atf7            | 1.706  | -1.090 | 1.301  | 0.871  | 1.370  | 0.559  | 0.302  | -0.472 | 1.002  | -0.911 | 223922    | ATF7    | NM_001310070_15_-1 |
| Gnas            | 2.586  | 1.923  | 0.907  | 1.056  | 1.550  | 1.361  | 1.819  | 1.343  | 1.939  | 1.578  | 14683     | GNAS    | NM_001310083_2_+1  |
| Dpm1            | 4.023  | 3.202  | 3.192  | 2.729  | 2.761  | 1.976  | 2.918  | 2.099  | 1.526  | 2.195  | 13480     | DPM1    | NM_001310084_2_-1  |
| Gnas            | -4.981 | -2.482 | -4.569 | -4.147 | -4.042 | -4.802 | -4.970 | -4.976 | -4.981 | -2.902 | 14683     | GNAS    | NM_001310085_2_+1  |
| Adnp            | -0.226 | 0.545  | -0.459 | -0.425 | 0.358  | 0.709  | -1.022 | -2.073 | -1.544 | -1.760 | 11538     | ADNP    | NM_001310086_2_-1  |
| Adnp            | -4.981 | -4.981 | -2.869 | -2.914 | -4.516 | -4.934 | -4.928 | -4.886 | -1.991 | -4.981 | 11538     | ADNP    | NM_001310088_2_-1  |
| Tmem218         | 3.998  | 4.772  | 1.734  | 0.914  | 1.076  | 1.751  | 1.120  | 1.371  | 1.219  | 0.651  | 66279     | TMEM218 | NM_001310096_9_+1  |
| Abcc9           | -4.981 | -4.981 | -4.882 | -3.589 | -4.229 | -1.154 | -3.247 | -1.250 | -3.905 | -2.719 | 20928     | ABCC9   | NM_001310143_6_-1  |
| Pax6            | -4.981 | -4.512 | -4.809 | -4.917 | -4.875 | -4.963 | -4.980 | -4.981 | -4.658 | -4.981 | 18508     | PAX6    | NM_001310144_2_+1  |
| Pax6            | -4.981 | -3.656 | -4.417 | -4.689 | -4.460 | -4.867 | -4.968 | -4.975 | -4.167 | -4.981 | 18508     | PAX6    | NM_001310145_2_+1  |
| Pax6            | -4.981 | -2.420 | -3.340 | -3.995 | -3.001 | -4.105 | -4.917 | -4.948 | -3.833 | -4.981 | 18508     | PAX6    | NM_001310146_2_+1  |
| Dysf            | -2.016 | -2.260 | -3.475 | -3.848 | -1.557 | -3.808 | -2.274 | -2.932 | -4.337 | -3.974 | 26903     | DYSF    | NM_001310152_6_+1  |
| Nelfb           | 3.194  | 3.143  | 3.113  | 3.106  | 3.202  | 3.087  | 2.904  | 3.123  | 3.293  | 3.023  | 58202     | NELFB   | NM_001310157_2_-1  |
| Ms4a4a          | -1.631 | -1.502 | -0.333 | -0.042 | -0.130 | 0.971  | 5.653  | 6.786  | 8.335  | 8.129  | 666907    | MS4A4A  | NM_001310331_19_+1 |
| Dnah7c          | -0.784 | -3.315 | -3.509 | -4.969 | -4.523 | -4.853 | -4.492 | -4.732 | -4.536 | -3.386 | 100101919 | DNAH7   | NM_001310335_1_+1  |
| Zfp119b         | -4.589 | -4.298 | -4.767 | -4.918 | -3.232 | -4.900 | -4.600 | -4.963 | -4.944 | -4.900 | 240120    | NA      | NM_001310337_17_-1 |
| Ppp3cb          | 4.070  | 2.871  | 3.896  | 3.482  | 3.712  | 3.186  | 3.392  | 2.797  | 3.135  | 3.304  | 19056     | PPP3CB  | NM_001310426_14_-1 |
| Ppp3cb          | 1.590  | 1.912  | 1.604  | 1.263  | 0.200  | -2.072 | 0.968  | -1.137 | 2.119  | -0.703 | 19056     | PPP3CB  | NM_001310427_14_-1 |
| Gpr161          | -4.981 | -1.830 | -1.674 | -0.621 | 0.202  | 1.330  | -2.207 | -2.546 | -4.141 | -4.086 | 240888    | GPR161  | NM_001310429_1_+1  |

|               |        |        |        |        |        |        |        |        |        |        |        |          |                     |
|---------------|--------|--------|--------|--------|--------|--------|--------|--------|--------|--------|--------|----------|---------------------|
| Gpr161        | -4.981 | -3.232 | -2.093 | -3.068 | -0.061 | -0.150 | -4.126 | -4.068 | -4.640 | -4.337 | 240888 | GPR161   | NM_001310430_1_+_1  |
| Synpo2l       | -4.039 | -3.613 | -2.658 | -4.023 | -4.879 | -4.956 | -4.640 | -4.832 | -2.742 | -4.137 | 68760  | SYNPO2L  | NM_001310431_14_-_1 |
| Impa1         | 1.006  | 1.473  | 2.101  | 2.196  | 0.143  | -0.571 | 2.098  | 0.700  | 2.436  | 1.453  | 55980  | IMPA1    | NM_001310433_3_-_1  |
| Fam171a1      | -0.326 | 1.190  | -2.867 | -2.451 | -4.569 | -4.452 | -4.358 | -2.576 | -0.193 | -0.391 | 269233 | FAM171A1 | NM_001310434_2_+_1  |
| Ank1          | -4.981 | -0.862 | -4.126 | -2.801 | -4.256 | -1.716 | -3.778 | -3.646 | -4.329 | -4.419 | 11733  | ANK1     | NM_001310436_8_+_1  |
| Ank1          | -4.981 | -3.031 | -4.606 | -4.615 | -4.794 | -4.769 | -4.782 | -4.827 | -4.642 | -4.686 | 11733  | ANK1     | NM_001310437_8_+_1  |
| Ly6g          | -4.981 | -3.315 | -3.949 | -1.161 | -4.887 | 0.311  | -3.889 | 0.222  | -0.590 | -4.981 | 546644 | NA       | NM_001310438_15_+_1 |
| Adam22        | -1.433 | -2.322 | 3.779  | 3.679  | 4.347  | 4.491  | 3.893  | 2.820  | -1.879 | -1.736 | 11496  | ADAM22   | NM_001310439_5_-_1  |
| Adam22        | -1.726 | -2.411 | -0.551 | -2.689 | -0.227 | -0.798 | -0.504 | -1.592 | -2.265 | -4.307 | 11496  | ADAM22   | NM_001310440_5_-_1  |
| Atp6v1h       | -0.648 | 0.484  | 0.689  | -0.424 | -0.501 | 0.047  | -0.374 | -1.927 | -1.954 | 0.593  | 108664 | ATP6V1H  | NM_001310442_1_+_1  |
| Kdm6a         | 4.389  | 4.637  | 5.411  | 5.439  | 5.149  | 5.498  | 5.242  | 5.343  | 5.243  | 5.696  | 22289  | KDM6A    | NM_001310444_X_+_1  |
| Slmap         | 3.658  | 2.841  | 3.945  | 4.014  | 4.265  | 4.557  | 3.904  | 3.788  | 4.309  | 4.558  | 83997  | SLMAP    | NM_001310445_14_-_1 |
| Dab2          | -2.084 | -4.981 | 0.052  | -2.982 | -2.717 | -1.528 | -1.051 | 0.263  | -4.586 | -2.593 | 13132  | DAB2     | NM_001310446_15_+_1 |
| Celf2         | 5.738  | 5.575  | 5.038  | 5.078  | 5.034  | 5.190  | 5.314  | 4.964  | 4.211  | 4.464  | 14007  | CELF2    | NM_001310447_2_-_1  |
| Cdk14         | -0.218 | -4.206 | 1.023  | -1.296 | -1.317 | -2.763 | -2.676 | -2.397 | -4.734 | -4.888 | 18647  | CDK14    | NM_001310448_5_-_1  |
| A830018L16Rik | -4.981 | -4.981 | -4.950 | -4.950 | -4.695 | -4.831 | -4.971 | -4.976 | -4.981 | -4.981 | 320492 | C8orf34  | NM_001310451_1_+_1  |
| Mapk8         | -0.311 | -0.812 | -2.369 | -1.028 | -1.742 | 0.062  | -1.314 | -0.260 | -0.732 | -1.314 | 26419  | MAPK8    | NM_001310452_14_-_1 |
| Mapk8         | 2.865  | 2.028  | 2.935  | 2.397  | 2.557  | 2.949  | 2.277  | 1.506  | 1.704  | 2.236  | 26419  | MAPK8    | NM_001310453_14_-_1 |
| Mapk8         | -2.436 | 0.740  | -0.043 | -2.229 | -1.218 | -1.990 | -1.480 | -3.767 | -0.939 | -0.012 | 26419  | MAPK8    | NM_001310454_14_-_1 |
| Cdk16         | -0.875 | 1.680  | -1.802 | 0.682  | 0.453  | 0.498  | -0.280 | 0.233  | 1.340  | 1.631  | 18555  | CDK16    | NM_001310456_X_+_1  |
| Eya1          | 3.680  | 3.686  | 0.191  | -1.688 | 0.631  | 0.312  | -1.688 | -3.696 | -4.025 | -4.589 | 14048  | EYA1     | NM_001310459_1_-_1  |
| Reln          | -3.297 | -3.170 | -4.141 | -1.149 | -4.487 | -2.951 | -3.674 | -3.661 | -4.981 | -3.611 | 19699  | RELN     | NM_001310464_5_-_1  |
| Pde4c         | -4.645 | -3.749 | -1.615 | 0.026  | -4.642 | -2.885 | -4.605 | -4.834 | -4.173 | -4.832 | 110385 | PDE4C    | NM_001310465_8_+_1  |
| Klhl13        | -4.981 | -0.601 | -4.978 | -4.933 | -4.953 | -4.708 | -4.934 | -3.521 | -4.981 | -4.981 | 67455  | KLHL13   | NM_001310466_X_-_1  |
| Rint1         | -1.169 | -4.041 | -4.245 | -2.732 | -2.124 | -4.201 | -2.097 | -4.955 | -4.774 | -4.619 | 72772  | RINT1    | NM_001310467_5_+_1  |
| Tceb1         | 4.846  | 4.849  | 4.346  | 4.426  | 4.428  | 4.321  | 4.492  | 4.181  | 4.149  | 4.143  | 67923  | TCEB1    | NM_001310470_1_-_1  |
| Fam126a       | -3.626 | -4.981 | -1.368 | -3.929 | -1.126 | -3.371 | -1.532 | -4.184 | -1.605 | -4.981 | 84652  | FAM126A  | NM_001310471_5_-_1  |
| Spta5         | 2.472  | 3.370  | 2.635  | 2.704  | 1.884  | 2.006  | 1.312  | 2.187  | 2.220  | 1.724  | 57815  | SPATA5   | NM_001310473_3_+_1  |
| Kcnq5         | -3.843 | -4.750 | -4.820 | -4.969 | -4.698 | -4.709 | -4.500 | -2.966 | -4.981 | -4.981 | 226922 | KCNQ5    | NM_001310477_1_-_1  |
| Trps1         | -0.837 | -0.005 | 1.464  | 1.115  | 0.127  | 0.390  | 1.370  | 1.245  | 5.049  | 5.301  | 83925  | TRPS1    | NM_001310481_15_-_1 |
| Mgst2         | 0.616  | 0.358  | -4.406 | -3.438 | -4.868 | -3.737 | -2.729 | -2.736 | -2.937 | -4.981 | 211666 | MGST2    | NM_001310482_3_+_1  |
| Lmbrd1        | 3.240  | 4.215  | 4.138  | 3.970  | 3.368  | 3.961  | 3.982  | 4.093  | 4.433  | 4.545  | 68421  | LMBRD1   | NM_001310483_1_+_1  |
| Bend6         | -1.639 | -1.280 | -2.213 | -1.259 | -1.325 | -3.685 | -1.829 | -3.148 | -4.034 | -2.607 | 320705 | BEND6    | NM_001310484_1_-_1  |
| Trps1         | 0.494  | -2.034 | 1.666  | 1.835  | 3.187  | 3.046  | 3.902  | 3.479  | 3.694  | 4.114  | 83925  | TRPS1    | NM_001310485_15_-_1 |
| Aatk          | -4.773 | -4.764 | -4.964 | -4.932 | -3.031 | -4.881 | -4.884 | -4.960 | -4.665 | -2.162 | 11302  | AATK     | NM_007377_11_-_1    |
| Abca4         | -0.280 | 0.096  | -3.021 | -3.195 | -4.978 | -4.923 | -4.976 | -4.900 | 0.851  | -0.054 | 11304  | ABCA4    | NM_007378_3_+_1     |
| Abca2         | 3.554  | 3.711  | 3.184  | 3.549  | 4.562  | 4.791  | 4.834  | 4.660  | 4.667  | 5.114  | 11305  | ABCA2    | NM_007379_2_+_1     |
| Abi1          | -3.937 | -3.563 | -2.420 | -4.587 | -4.653 | -3.487 | -4.219 | -4.732 | -4.225 | -4.480 | 11308  | ABI1     | NM_007380_2_-_1     |
| Acadl         | 7.968  | 7.724  | 7.668  | 6.521  | 6.394  | 5.870  | 6.125  | 5.866  | 5.655  | 5.301  | 11363  | ACADL    | NM_007381_1_-_1     |
| Acadm         | 5.864  | 6.039  | 5.928  | 6.043  | 6.119  | 5.994  | 6.180  | 6.121  | 5.932  | 6.108  | 11364  | ACADM    | NM_007382_3_-_1     |
| Acads         | 4.012  | 3.799  | 3.311  | 3.455  | 2.627  | 2.591  | 2.936  | 3.259  | 4.077  | 4.250  | 11409  | ACADS    | NM_007383_5_-_1     |
| Apoc4         | -4.981 | -4.981 | -4.821 | -4.973 | -4.981 | -4.981 | -2.755 | -2.913 | -1.367 | -0.493 | 11425  | APOC4    | NM_007385_7_-_1     |
| Aco1          | 4.020  | 4.290  | 5.106  | 5.111  | 4.497  | 4.617  | 4.489  | 4.750  | 5.934  | 6.156  | 11428  | ACO1     | NM_007386_4_+_1     |
| Acp2          | 2.978  | 1.949  | 4.573  | 5.021  | 5.802  | 6.098  | 6.051  | 6.864  | 5.697  | 6.472  | 11432  | ACP2     | NM_007387_2_+_1     |
| Acp5          | 4.119  | 4.504  | 4.197  | 5.969  | 7.666  | 8.827  | 6.832  | 7.858  | 3.635  | 5.415  | 11433  | NA       | NM_007388_9_-_1     |
| Chrna1        | 0.657  | 0.747  | 0.498  | -0.027 | -0.356 | -0.482 | -0.145 | -0.329 | -0.970 | -1.089 | 11435  | CHRNA1   | NM_007389_2_-_1     |
| Acta2         | -0.077 | 0.075  | -2.361 | -1.947 | -3.886 | -2.002 | -0.981 | -1.316 | 2.670  | 2.302  | 11475  | ACTA2    | NM_007392_19_-_1    |
| Actb          | 11.846 | 11.950 | 12.677 | 12.683 | 12.864 | 12.802 | 12.556 | 12.431 | 12.957 | 12.897 | 11461  | ACTB     | NM_007393_5_-_1     |
| Acvr1         | -4.535 | -0.975 | -2.418 | -3.200 | -1.490 | -2.356 | 0.794  | -0.050 | 1.247  | 0.328  | 11477  | ACVR1    | NM_007394_2_-_1     |
| Acvr1b        | -0.243 | 0.422  | 0.451  | 0.718  | 1.042  | 1.042  | 0.989  | 0.871  | 1.895  | 2.098  | 11479  | ACVR1B   | NM_007395_15_+_1    |
| Acvr2a        | 4.393  | 4.767  | 2.928  | 2.529  | 3.402  | 3.773  | 3.932  | 3.479  | 3.612  | 4.031  | 11480  | ACVR2A   | NM_007396_2_+_1     |
| Acvr2b        | 3.079  | 2.981  | 1.984  | 2.084  | 1.281  | 0.683  | 1.624  | 1.395  | 1.473  | 2.076  | 11481  | ACVR2B   | NM_007397_9_+_1     |
| Ada           | 3.074  | 2.898  | 2.184  | 2.361  | 3.584  | 2.949  | 2.988  | 3.282  | 2.137  | 2.592  | 11486  | ADA      | NM_007398_2_-_1     |
| Adam10        | 5.548  | 5.757  | 5.313  | 5.358  | 5.434  | 5.628  | 5.914  | 6.290  | 7.354  | 7.901  | 11487  | ADAM10   | NM_007399_9_+_1     |
| Adam12        | -4.981 | -4.981 | -4.981 | -4.981 | -4.782 | 0.094  | -4.312 | -1.358 | -4.981 | -2.572 | 11489  | ADAM12   | NM_007400_7_-_1     |
| Adam8         | 0.051  | -0.168 | 7.043  | 6.812  | 5.942  | 5.808  | 4.704  | 4.241  | 1.638  | 2.609  | 11501  | ADAM8    | NM_007403_7_-_1     |
| Adam9         | 0.131  | 3.360  | 1.270  | 4.051  | 1.669  | 4.287  | -0.237 | 4.625  | 1.184  | 6.767  | 11502  | ADAM9    | NM_007404_8_-_1     |
| Adcy6         | -0.525 | -1.488 | 4.279  | 4.512  | 3.528  | 3.540  | 1.671  | 1.315  | -2.923 | -2.895 | 11512  | ADCY6    | NM_007405_15_-_1    |
| Adcy7         | -3.182 | -2.539 | -0.479 | 1.040  | -2.417 | -4.437 | -0.789 | -3.835 | -2.385 | -0.153 | 11513  | ADCY7    | NM_007406_8_+_1     |
| Plin2         | 5.144  | 5.718  | 7.881  | 7.902  | 3.269  | 3.810  | 6.638  | 7.058  | 8.030  | 8.239  | 11520  | PLIN2    | NM_007408_4_-_1     |
| Adh1          | -4.981 | -1.144 | -4.958 | 0.845  | -4.996 | -3.006 | -4.741 | -0.198 | -4.981 | -4.981 | 11522  | ADH1C    | NM_007409_3_+_1     |
| Adh5          | 7.532  | 7.443  | 7.038  | 7.049  | 7.100  | 6.859  | 6.865  | 6.703  | 6.128  | 5.947  | 11532  | ADH5     | NM_007410_3_+_1     |
| Gpr182        | -1.316 | -3.408 | -4.494 | -3.252 | -3.102 | -2.721 | -3.037 | -2.957 | -4.981 | -3.165 | 11536  | GPR182   | NM_007412_10_-_1    |
| Adora2b       | -2.388 | -4.981 | 2.842  | 1.458  | 2.965  | 2.827  | 3.873  | 3.578  | 5.236  | 5.183  | 11541  | ADORA2B  | NM_007413_11_+_1    |
| Adprh         | 6.298  | 6.147  | 6.236  | 6.154  | 6.705  | 6.392  | 6.383  | 6.336  | 6.669  | 6.610  | 11544  | ADPRH    | NM_007414_16_-_1    |
| Parp1         | 5.850  | 5.706  | 5.549  | 5.776  | 5.850  | 5.709  | 6.146  | 6.365  | 6.489  | 6.598  | 11545  | PARP1    | NM_007415_1_+_1     |
| Adra1b        | 1.513  | 1.614  | -4.962 | -4.649 | -4.431 | -3.782 | -4.941 | -4.961 | -4.981 | -4.981 | 11548  | ADRA1B   | NM_007416_11_-_1    |
| Adra2a        | -4.981 | -4.981 | -4.969 | -4.746 | -3.415 | -4.861 | -4.961 | -4.971 | -4.981 | -4.981 | 11551  | ADRA2A   | NM_007417_19_+_1    |
| Adrb1         | -1.835 | -4.981 | -3.108 | -1.994 | -1.533 | 0.684  | 1.720  | 2.533  | 1.221  | 0.047  | 11554  | ADRB1    | NM_007419_19_+_1    |
| Adrb2         | 5.962  | 6.134  | 6.754  | 6.733  | 5.952  | 7.031  | 6.554  | 6.813  | 7.460  | 7.086  | 11555  | ADRB2    | NM_007420_18_-_1    |
| Adssl1        | 6.873  | 6.642  | 2.977  | 3.126  | 2.958  | 3.229  | 6.119  | 6.322  | 7.944  | 7.552  | 11565  | ADSSL1   | NM_007421_12_+_1    |
| Adss          | 6.183  | 6.126  | 5.720  | 5.719  | 5.381  | 5.164  | 5.818  | 5.835  | 6.678  | 6.559  | 11566  | ADSS     | NM_007422_1_-_1     |
| Afp           | -0.284 | 1.155  | -2.666 | -1.199 | -0.627 | -1.974 | -0.959 | -0.132 | -4.981 | -2.161 | 11576  | AFP      | NM_007423_5_+_1     |
| Ager          | -4.375 | -4.981 | -1.031 | -1.037 | -0.792 | -3.038 | -1.828 | -2.087 | -1.814 | -4.913 | 11596  | AGER     | NM_007425_17_+_1    |

|          |        |        |        |        |        |        |        |        |        |        |           |          |                 |
|----------|--------|--------|--------|--------|--------|--------|--------|--------|--------|--------|-----------|----------|-----------------|
| Angpt2   | -2.501 | -1.131 | -2.547 | -2.225 | -2.146 | -2.493 | -4.402 | -3.888 | -3.022 | -3.853 | 11601     | ANGPT2   | NM_007426_8_-1  |
| Agpr     | -2.647 | -4.981 | -3.525 | -3.883 | -3.757 | -4.944 | -3.055 | -3.749 | -4.981 | -4.316 | 11604     | AGRP     | NM_007427_8_-1  |
| Alpl     | -4.981 | -4.981 | 2.442  | 3.276  | -2.810 | -1.878 | -1.935 | -0.334 | -3.501 | -4.003 | 11647     | ALPL     | NM_007431_4_-1  |
| Akt2     | 4.716  | 4.568  | 4.881  | 5.038  | 5.220  | 5.036  | 5.099  | 5.162  | 5.019  | 5.135  | 11652     | AKT2     | NM_007434_7_+1  |
| Abcd1    | 6.080  | 6.194  | 6.601  | 6.544  | 6.897  | 6.904  | 6.830  | 6.829  | 7.848  | 7.782  | 11666     | ABCD1    | NM_007435_X_+1  |
| Aldh3a2  | 4.956  | 5.292  | 5.635  | 5.628  | 5.628  | 5.781  | 5.611  | 5.727  | 6.316  | 6.436  | 11671     | ALDH3A2  | NM_007437_11_-1 |
| Aldoa    | 8.131  | 7.964  | 7.970  | 8.489  | 7.320  | 7.736  | 8.160  | 8.577  | 9.100  | 9.158  | 11674     | ALDOA    | NM_007438_7_-1  |
| Alox12   | -0.697 | 0.115  | -0.897 | -0.115 | -1.084 | -0.855 | 0.458  | -1.186 | 1.942  | 1.629  | 11684     | ALOX12   | NM_007440_11_-1 |
| Alx4     | -4.981 | -2.060 | -3.624 | -2.609 | -4.316 | -4.212 | -4.694 | -4.720 | -4.190 | -4.342 | 11695     | ALX4     | NM_007442_2_+1  |
| Ambp     | -4.981 | -4.981 | -4.981 | -4.981 | -4.981 | -4.981 | -4.933 | -4.560 | -2.834 | -2.392 | 11699     | AMBP     | NM_007443_4_-1  |
| Amd2     | 3.793  | 3.850  | 4.750  | 4.909  | 4.387  | 4.357  | 3.960  | 4.197  | 4.789  | 4.751  | 100041585 | AMD1     | NM_007444_10_-1 |
| Amy1     | -4.301 | -4.292 | -4.965 | -4.949 | -4.928 | -4.973 | -4.943 | -4.973 | -4.594 | -4.880 | 11722     | AMY2A    | NM_007446_3_-1  |
| Ang      | -2.777 | -0.116 | -4.876 | -4.975 | -4.981 | -4.981 | -4.613 | -4.616 | 0.134  | -1.461 | 11727     | ANG      | NM_007447_14_+1 |
| Ang2     | -0.678 | -1.739 | -4.691 | -4.496 | -4.595 | -4.032 | -4.937 | -4.923 | -4.981 | -4.981 | 11731     | NA       | NM_007449_14_-1 |
| Slc25a4  | 7.664  | 7.696  | 7.630  | 7.729  | 7.399  | 7.416  | 6.716  | 6.841  | 6.300  | 6.362  | 11739     | SLC25A4  | NM_007450_8_-1  |
| Slc25a5  | 9.929  | 9.890  | 9.864  | 9.871  | 9.563  | 9.596  | 9.687  | 9.883  | 9.847  | 10.040 | 11740     | SLC25A5  | NM_007451_X_+1  |
| Prdx3    | 6.336  | 6.302  | 6.513  | 6.605  | 6.039  | 6.288  | 5.966  | 6.310  | 5.689  | 5.858  | 11757     | PRDX3    | NM_007452_19_-1 |
| Prdx6    | 7.741  | 7.396  | 7.401  | 7.739  | 8.375  | 8.587  | 8.092  | 7.885  | 7.535  | 7.239  | 11758     | PRDX6    | NM_007453_1_-1  |
| Ap1b1    | 5.048  | 5.109  | 7.336  | 7.489  | 6.276  | 6.561  | 6.631  | 6.951  | 6.515  | 6.799  | 11764     | AP1B1    | NM_007454_11_+1 |
| Ap1g2    | 4.518  | 4.706  | 5.729  | 6.201  | 4.866  | 5.251  | 4.877  | 5.228  | 5.215  | 5.438  | 11766     | AP1G2    | NM_007455_14_-1 |
| Ap1m1    | 6.662  | 6.585  | 6.660  | 6.714  | 6.493  | 6.684  | 6.577  | 6.883  | 7.112  | 7.049  | 11767     | AP1M1    | NM_007456_8_+1  |
| Ap1s1    | 6.247  | 6.190  | 4.883  | 5.384  | 5.197  | 5.512  | 5.068  | 5.365  | 5.049  | 5.079  | 11769     | AP1S1    | NM_007457_5_-1  |
| Ap2a1    | -1.030 | -3.413 | -3.853 | -2.865 | -4.624 | -4.838 | -4.006 | -4.764 | -4.250 | -4.412 | 11771     | AP2A1    | NM_007458_7_-1  |
| Ap2a2    | 4.794  | 5.034  | 5.721  | 5.835  | 5.141  | 5.367  | 5.797  | 6.436  | 7.886  | 8.239  | 11772     | AP2A2    | NM_007459_7_+1  |
| Ap3d1    | 6.141  | 5.837  | 6.761  | 6.838  | 6.172  | 6.216  | 6.242  | 6.353  | 6.755  | 6.834  | 11776     | AP3D1    | NM_007460_10_-1 |
| Apc      | 6.401  | 6.304  | 5.448  | 5.359  | 4.524  | 4.556  | 5.047  | 4.899  | 5.173  | 5.325  | 11789     | APC      | NM_007462_18_+1 |
| Birc3    | 7.015  | 6.758  | 7.719  | 7.723  | 7.974  | 7.897  | 7.821  | 7.704  | 7.457  | 7.776  | 11796     | BIRC3    | NM_007464_9_-1  |
| Birc2    | 5.121  | 5.005  | 5.463  | 5.951  | 6.242  | 6.389  | 5.792  | 5.519  | 4.961  | 4.956  | 11797     | BIRC2    | NM_007465_9_-1  |
| Api5     | 5.542  | 5.505  | 6.520  | 6.599  | 6.687  | 6.549  | 6.840  | 6.703  | 7.647  | 7.774  | 11800     | API5     | NM_007466_2_-1  |
| Aplp1    | -3.090 | -1.842 | -0.756 | -0.854 | -0.868 | -0.109 | -2.506 | -3.179 | -1.871 | -2.647 | 11803     | APLP1    | NM_007467_7_-1  |
| Apoc1    | -4.981 | -4.981 | -2.596 | -4.962 | -4.981 | -4.981 | -4.968 | -4.548 | -0.879 | -0.910 | 11812     | NA       | NM_007469_7_-1  |
| Apod     | 3.415  | 1.820  | 2.034  | -0.368 | -4.836 | -4.917 | -2.740 | -3.354 | -3.033 | -4.558 | 11815     | APOD     | NM_007470_16_-1 |
| App      | 2.331  | 1.278  | 3.332  | 3.668  | 4.941  | 5.374  | 4.118  | 4.433  | 4.661  | 4.637  | 11820     | APP      | NM_007471_16_-1 |
| Aqp1     | -3.843 | -0.336 | -2.071 | 2.825  | -0.284 | 3.313  | 0.187  | 3.697  | 0.128  | 2.065  | 11826     | AQP1     | NM_007472_6_+1  |
| Aqp7     | 0.177  | -1.789 | -2.296 | -1.638 | -3.452 | -4.394 | -3.937 | -4.673 | -3.567 | -3.595 | 11832     | AQP7     | NM_007473_4_-1  |
| Rplp0    | 10.267 | 9.956  | 10.974 | 10.666 | 10.522 | 10.112 | 10.480 | 10.327 | 9.981  | 9.533  | 11837     | RPLP0    | NM_007475_5_+1  |
| Arf1     | 9.133  | 9.242  | 8.920  | 9.061  | 8.904  | 8.895  | 8.866  | 9.044  | 9.241  | 9.362  | 11840     | ARF1     | NM_007476_11_-1 |
| Arf2     | 1.298  | 2.229  | 2.966  | 1.663  | 3.984  | 3.899  | 4.040  | 2.921  | 2.719  | 2.582  | 11841     | NA       | NM_007477_11_+1 |
| Arf3     | 5.834  | 5.786  | 7.269  | 7.381  | 6.762  | 6.923  | 6.742  | 6.808  | 7.087  | 7.223  | 11842     | ARF3     | NM_007478_15_-1 |
| Arf4     | 8.756  | 8.757  | 8.136  | 8.155  | 8.009  | 8.036  | 8.088  | 8.169  | 7.990  | 8.313  | 11843     | ARF4     | NM_007479_14_+1 |
| Arf5     | 6.970  | 6.797  | 7.169  | 7.052  | 6.610  | 6.669  | 6.726  | 6.865  | 7.267  | 6.982  | 11844     | ARF5     | NM_007480_6_+1  |
| Arf6     | 7.433  | 7.096  | 8.129  | 8.429  | 8.367  | 8.582  | 7.894  | 8.240  | 7.787  | 7.914  | 11845     | ARF6     | NM_007481_12_+1 |
| Arg1     | -1.518 | -3.315 | -4.437 | -2.663 | -3.770 | -3.511 | -3.474 | -3.803 | -1.948 | -3.855 | 11846     | ARG1     | NM_007482_10_-1 |
| Rhob     | 4.274  | 3.959  | 3.395  | 3.216  | 5.392  | 5.850  | 4.950  | 4.732  | 5.524  | 5.724  | 11852     | RHOB     | NM_007483_12_-1 |
| Rhoc     | -1.617 | -1.720 | 0.717  | 1.276  | -0.681 | 0.114  | -0.924 | -0.729 | -2.598 | -2.596 | 11853     | RHOC     | NM_007484_3_+1  |
| Rhod     | -2.388 | -0.671 | -0.491 | 1.068  | 1.524  | 3.443  | -0.386 | -0.143 | -4.981 | -4.981 | 11854     | RHOD     | NM_007485_19_-1 |
| Arhgdib  | 10.585 | 10.396 | 7.886  | 7.611  | 9.919  | 9.899  | 9.821  | 9.974  | 10.044 | 9.874  | 11857     | ARHGDIB  | NM_007486_6_-1  |
| Arl4a    | 6.350  | 6.060  | 4.773  | 4.965  | 4.807  | 4.743  | 4.109  | 4.049  | 2.833  | 2.871  | 11861     | ARL4A    | NM_007487_12_-1 |
| Arnt2    | -4.981 | -4.981 | -4.427 | -3.809 | -4.119 | -3.476 | -3.161 | -4.053 | -4.981 | -2.885 | 11864     | ARNT2    | NM_007488_7_-1  |
| Arntl    | 2.300  | 2.427  | 2.408  | 3.245  | 3.069  | 2.926  | 3.044  | 3.247  | 3.593  | 3.528  | 11865     | ARNTL    | NM_007489_7_+1  |
| Art2a-ps | -1.750 | -1.822 | -0.313 | 1.438  | -1.945 | 1.343  | -1.994 | 3.237  | 0.800  | 0.992  | 11871     | NA       | NM_007490_7_-1  |
| Art5     | -4.513 | -4.981 | -4.981 | -4.981 | -4.869 | -4.964 | -4.943 | -4.917 | -4.981 | -4.981 | 11875     | ART5     | NM_007491_7_-1  |
| Asgr2    | -3.563 | -4.981 | -4.101 | -4.709 | -3.528 | -3.781 | -0.663 | -0.688 | -1.155 | -2.562 | 11890     | ASGR2    | NM_007493_11_+1 |
| Ass1     | 2.562  | 2.052  | 3.656  | 3.389  | 3.191  | 2.233  | 3.137  | 3.146  | 2.032  | 2.524  | 11898     | ASS1     | NM_007494_2_+1  |
| Zfhx3    | 2.407  | 2.914  | 3.465  | 3.977  | 2.136  | 2.152  | 2.596  | 2.678  | 3.772  | 3.907  | 11906     | ZFHX3    | NM_007496_8_+1  |
| Atf1     | 5.072  | 5.161  | 4.912  | 4.815  | 4.857  | 4.804  | 4.947  | 4.948  | 4.988  | 5.138  | 11908     | ATF1     | NM_007497_15_+1 |
| Atf3     | 4.283  | 5.168  | 7.677  | 7.971  | 9.093  | 9.204  | 9.310  | 9.310  | 8.921  | 9.306  | 11910     | ATF3     | NM_007498_1_-1  |
| Atm      | 4.860  | 4.590  | 3.991  | 3.832  | 4.112  | 4.037  | 3.930  | 3.510  | 2.685  | 2.679  | 11920     | ATM      | NM_007499_9_-1  |
| Atp1b3   | 8.093  | 7.931  | 8.300  | 7.498  | 6.556  | 6.703  | 7.499  | 8.073  | 8.666  | 8.672  | 11933     | ATP1B3   | NM_007502_9_-1  |
| Fxyd2    | -1.449 | -1.620 | 0.403  | 1.060  | 1.590  | 0.614  | 2.774  | 1.514  | -4.190 | -2.555 | 11936     | NA       | NM_007503_9_+1  |
| Atp2a1   | 7.959  | 8.359  | -1.076 | -1.218 | -2.054 | -0.517 | -2.426 | -0.081 | -0.798 | -1.583 | 11937     | ATP2A1   | NM_007504_7_-1  |
| Atp5a1   | 9.055  | 9.112  | 9.099  | 9.281  | 9.090  | 8.997  | 9.071  | 9.299  | 9.224  | 9.257  | 11946     | ATP5A1   | NM_007505_18_+1 |
| Atp5g1   | 8.126  | 7.261  | 7.702  | 7.040  | 7.416  | 6.825  | 7.820  | 7.054  | 6.845  | 5.713  | 11951     | ATP5G1   | NM_007506_11_-1 |
| Atp5k    | 6.200  | 5.885  | 6.031  | 6.010  | 5.889  | 5.750  | 6.316  | 6.034  | 5.387  | 4.883  | 11958     | NA       | NM_007507_5_-1  |
| Atp6v1a  | 5.941  | 6.113  | 5.721  | 6.203  | 5.390  | 5.521  | 6.230  | 6.229  | 7.593  | 7.889  | 11964     | ATP6V1A  | NM_007508_16_-1 |
| Atp6v1b2 | 5.692  | 5.864  | 6.903  | 7.101  | 6.060  | 6.165  | 6.882  | 7.487  | 9.271  | 9.226  | 11966     | ATP6V1B2 | NM_007509_8_+1  |
| Atp6v1e1 | 7.861  | 7.800  | 7.271  | 7.195  | 7.192  | 7.119  | 7.331  | 7.184  | 7.955  | 7.471  | 11973     | ATP6V1E1 | NM_007510_6_-1  |
| Atp7b    | -4.981 | -4.981 | -2.129 | -0.842 | -3.018 | -2.510 | -3.956 | -2.545 | -2.659 | -1.446 | 11979     | ATP7B    | NM_007511_8_-1  |
| Atpif1   | 7.565  | 7.378  | 9.550  | 9.556  | 7.763  | 7.876  | 8.117  | 8.042  | 6.116  | 5.999  | 11983     | ATPIF1   | NM_007512_4_-1  |
| Slc7a1   | 3.704  | 3.595  | 3.612  | 3.496  | 3.506  | 3.351  | 3.310  | 3.079  | 3.049  | 1.534  | 11987     | SLC7A1   | NM_007513_5_-1  |
| Slc7a2   | -4.981 | -3.547 | -4.223 | -3.280 | -3.590 | -4.878 | -3.410 | -4.960 | -3.544 | -1.847 | 11988     | SLC7A2   | NM_007514_8_+1  |
| Slc7a3   | -4.410 | -4.578 | -4.953 | -4.965 | -4.770 | -4.934 | -4.863 | -4.894 | -4.877 | -4.981 | 11989     | SLC7A3   | NM_007515_X_-1  |
| Hnmpnd   | 4.553  | 4.224  | 4.589  | 4.740  | 4.884  | 4.637  | 4.524  | 4.274  | 4.566  | 4.312  | 11991     | HNRNPD   | NM_007516_5_-1  |
| Aup1     | 7.474  | 7.367  | 7.058  | 7.423  | 7.197  | 7.381  | 7.574  | 7.855  | 7.920  | 7.945  | 11993     | AUP1     | NM_007517_6_+1  |

|         |        |        |        |        |        |        |        |        |        |        |       |             |                 |
|---------|--------|--------|--------|--------|--------|--------|--------|--------|--------|--------|-------|-------------|-----------------|
| Bach1   | 4.507  | 3.778  | 4.255  | 4.142  | 5.562  | 5.834  | 5.790  | 5.490  | 6.651  | 6.377  | 12013 | BACH1       | NM_007520_16_+1 |
| Bad     | 3.764  | 3.352  | 3.142  | 2.957  | 2.149  | 2.081  | 2.463  | 2.461  | 2.766  | 2.627  | 12015 | BAD         | NM_007522_19_+1 |
| Bak1    | 1.050  | 0.961  | 2.150  | 2.322  | 1.731  | 2.022  | 2.153  | 1.909  | 2.121  | 2.073  | 12018 | BAK1        | NM_007523_17_-1 |
| Bard1   | -0.291 | -0.189 | 0.279  | 0.149  | 1.783  | 1.270  | 0.699  | -0.425 | -0.394 | -2.354 | 12021 | BARD1       | NM_007525_1_-1  |
| Bax     | 7.180  | 6.949  | 7.373  | 7.338  | 7.438  | 7.472  | 7.302  | 7.281  | 6.793  | 6.644  | 12028 | BAX         | NM_007527_7_-1  |
| Bcl6b   | -2.739 | -4.981 | -4.935 | -4.544 | -4.293 | -4.304 | -4.141 | -4.338 | -4.981 | -4.981 | 12029 | BCL6B       | NM_007528_11_-1 |
| Bcap29  | 2.295  | 2.227  | 3.439  | 3.152  | 3.030  | 3.080  | 2.426  | 2.079  | 1.866  | 1.341  | 12033 | BCAP29      | NM_007530_12_-1 |
| Phb2    | 7.397  | 7.194  | 7.210  | 7.309  | 6.959  | 6.913  | 6.871  | 7.195  | 6.725  | 6.460  | 12034 | PHB2        | NM_007531_6_+1  |
| Bcat1   | -2.290 | -3.767 | -4.911 | -0.363 | -3.895 | -1.177 | -3.260 | 0.565  | -4.981 | -4.981 | 12035 | BCAT1       | NM_007532_6_-1  |
| Bckdha  | 6.294  | 6.216  | 5.422  | 5.329  | 5.832  | 6.148  | 6.071  | 6.222  | 6.615  | 6.581  | 12039 | BCKDHA      | NM_007533_7_-1  |
| Bcl2a1b | 4.492  | 2.429  | 9.077  | 8.591  | 10.122 | 9.788  | 9.685  | 8.636  | 4.785  | 5.002  | 12045 | BCL2A1      | NM_007534_9_+1  |
| Bcl2a1c | -3.668 | -2.997 | 1.421  | 1.111  | 1.381  | 0.864  | 0.596  | -0.079 | -1.750 | -1.187 | 12046 | NA          | NM_007535_9_+1  |
| Bcl2a1d | 3.613  | 2.137  | 9.240  | 9.497  | 9.449  | 9.484  | 9.213  | 8.986  | 4.853  | 6.042  | 12047 | BCL2A1      | NM_007536_9_-1  |
| Bcl2l2  | 2.753  | 2.663  | 1.382  | 0.404  | 0.015  | -0.062 | 1.239  | 0.034  | 1.098  | 1.472  | 12050 | BCL2L2      | NM_007537_14_+1 |
| Opn1sw  | -2.925 | -4.981 | -2.587 | -2.910 | -3.052 | -2.744 | -4.761 | -4.867 | -3.242 | -2.446 | 12057 | OPN1SW      | NM_007538_6_-1  |
| Bdkrb1  | -2.388 | -4.981 | -2.403 | -2.699 | -2.583 | -3.338 | -3.691 | -3.435 | -4.394 | -4.981 | 12061 | BDKRB1      | NM_007539_12_+1 |
| Bgn     | -2.842 | -1.991 | -3.452 | -5.000 | -3.084 | -3.929 | -3.814 | -2.209 | -2.501 | -1.384 | 12111 | BGN         | NM_007542_X_+1  |
| Ceacam2 | -4.981 | -4.873 | -3.318 | -2.175 | -3.003 | -3.796 | -3.832 | -0.338 | -3.213 | -1.475 | 26367 | CEACAM1     | NM_007543_7_-1  |
| Bid     | 5.565  | 5.097  | 6.802  | 7.190  | 5.948  | 6.074  | 5.980  | 6.199  | 7.043  | 6.614  | 12122 | BID         | NM_007544_6_-1  |
| Bik     | -1.532 | -4.981 | -3.346 | -2.917 | -1.953 | -3.955 | -2.873 | -2.732 | -4.394 | -4.981 | 12124 | BIK         | NM_007546_15_+1 |
| Sirpa   | 2.876  | 2.286  | 0.908  | 0.287  | 4.765  | 5.266  | 4.813  | 5.591  | 6.522  | 7.585  | 19261 | SIRPA       | NM_007547_2_+1  |
| Prdm1   | 1.304  | 2.367  | -0.220 | 0.576  | 1.773  | 1.939  | 3.637  | 4.825  | 4.286  | 5.304  | 12142 | PRDM1       | NM_007548_10_-1 |
| Blk     | 2.557  | 2.474  | -0.350 | 2.268  | 4.100  | 5.368  | 2.360  | 4.925  | -0.067 | 0.494  | 12143 | BLK         | NM_007549_14_-1 |
| Blm     | -1.731 | -4.364 | -0.711 | -0.695 | 0.142  | -0.280 | 0.711  | -1.243 | 0.178  | -1.034 | 12144 | BLM         | NM_007550_7_-1  |
| Cxcr5   | -0.841 | -1.255 | -0.993 | 1.393  | 1.753  | 2.782  | 1.399  | 4.222  | -1.922 | 0.376  | 12145 | CXCR5       | NM_007551_9_-1  |
| Bmi1    | 5.213  | 5.036  | 4.693  | 4.819  | 4.107  | 4.324  | 4.502  | 4.434  | 3.954  | 4.209  | 12151 | COMMD3-BMI1 | NM_007552_2_+1  |
| Bmp2    | -2.099 | -1.910 | -3.289 | -0.750 | 4.497  | 3.691  | 0.382  | 0.018  | -2.598 | -3.098 | 12156 | BMP2        | NM_007553_2_+1  |
| Bmp4    | -4.981 | -4.981 | -4.981 | -4.981 | -4.972 | -4.845 | -4.764 | -3.847 | -4.981 | -4.316 | 12159 | BMP4        | NM_007554_14_-1 |
| Bmp6    | 0.577  | 1.231  | -4.032 | -4.648 | -4.981 | -4.901 | -4.864 | -3.478 | -4.981 | -4.981 | 12161 | BMP6        | NM_007556_13_+1 |
| Bmp7    | -4.981 | -4.981 | -4.963 | -4.963 | -4.658 | -4.762 | -3.941 | -4.120 | -2.741 | -4.981 | 12162 | BMP7        | NM_007557_2_-1  |
| Bmp8a   | -4.981 | -2.160 | -3.689 | -2.998 | 3.084  | 3.349  | 1.217  | 0.464  | -3.006 | -3.972 | 12163 | BMP8A       | NM_007558_4_-1  |
| Bmp8b   | -4.981 | -2.997 | -3.507 | -4.473 | -4.692 | -3.878 | -4.915 | -4.484 | -4.981 | -3.098 | 12164 | NA          | NM_007559_4_+1  |
| Bmpr2   | 3.513  | 3.564  | 3.844  | 3.854  | 3.491  | 3.212  | 4.097  | 3.947  | 4.566  | 5.221  | 12168 | BMPR2       | NM_007561_1_+1  |
| Bpgm    | 4.572  | 4.793  | 4.486  | 5.179  | 3.895  | 5.164  | 3.734  | 5.079  | 3.533  | 4.007  | 12183 | BPGM        | NM_007563_6_+1  |
| Zfp36l1 | 8.164  | 7.861  | 7.137  | 7.271  | 7.955  | 7.634  | 7.913  | 7.678  | 3.952  | 4.840  | 12192 | ZFP36L1     | NM_007564_12_-1 |
| Birc6   | 5.425  | 5.256  | 6.260  | 5.757  | 6.469  | 6.216  | 5.919  | 5.809  | 5.643  | 5.437  | 12211 | BIRC6       | NM_007566_17_+1 |
| Bsn     | 2.967  | 3.326  | -0.746 | -0.366 | -0.704 | -0.059 | -1.535 | -0.659 | -0.798 | -0.411 | 12217 | BSN         | NM_007567_9_-1  |
| Btg1    | 10.483 | 10.822 | 10.245 | 10.129 | 11.055 | 10.966 | 10.372 | 10.398 | 10.356 | 10.392 | 12226 | BTG1        | NM_007569_10_+1 |
| Btg2    | 7.958  | 9.151  | 9.906  | 10.093 | 10.389 | 10.782 | 9.897  | 10.101 | 9.180  | 10.351 | 12227 | BTG2        | NM_007570_1_-1  |
| C1qa    | 5.901  | 3.602  | 4.541  | 4.735  | 5.758  | 5.204  | 5.961  | 7.102  | 2.671  | 2.191  | 12259 | C1QA        | NM_007572_4_-1  |
| C1qbp   | 7.165  | 6.997  | 6.962  | 7.066  | 6.784  | 6.971  | 6.507  | 6.562  | 4.539  | 4.374  | 12261 | C1QBP       | NM_007573_11_-1 |
| C1qc    | 6.778  | 4.192  | 5.234  | 5.268  | 6.671  | 5.540  | 6.575  | 7.173  | 3.276  | 2.549  | 12262 | C1QC        | NM_007574_4_-1  |
| Ciita   | 5.922  | 5.320  | 4.280  | 4.057  | 7.634  | 7.404  | 5.147  | 4.900  | 2.633  | 2.370  | 12265 | CIITA       | NM_007575_16_+1 |
| C5ar1   | -2.033 | -3.543 | -2.745 | 0.841  | -2.059 | 2.136  | 3.903  | 5.327  | 5.652  | 6.794  | 12273 | C5AR1       | NM_007577_7_-1  |
| Cacna1a | -3.039 | 1.861  | -3.770 | -4.137 | -4.005 | -2.285 | -3.332 | -2.537 | -3.569 | -4.014 | 12286 | CACNA1A     | NM_007578_8_+1  |
| Cacna1b | -4.007 | -4.981 | -2.395 | -2.656 | -3.351 | -3.355 | -4.964 | -4.068 | -4.981 | -1.687 | 12287 | CACNA1B     | NM_007579_2_-1  |
| Cacnb3  | -4.501 | -4.743 | -0.853 | -0.372 | -0.770 | -2.368 | -4.264 | -3.888 | -4.775 | -4.936 | 12297 | CACNB3      | NM_007581_15_+1 |
| Ddr1    | -3.184 | -2.804 | -4.122 | -4.650 | -4.402 | -4.819 | -3.952 | -4.751 | -4.399 | -4.661 | 12305 | DDR1        | NM_007584_17_-1 |
| Anxa2   | 7.064  | 7.285  | 6.656  | 6.845  | 8.103  | 7.567  | 8.452  | 9.024  | 10.294 | 10.228 | 12306 | ANXA2       | NM_007585_9_+1  |
| Calm2   | 9.614  | 9.955  | 8.359  | 8.278  | 9.069  | 9.154  | 8.929  | 8.809  | 8.561  | 8.528  | 12314 | NA          | NM_007589_17_-1 |
| Calm3   | 6.870  | 6.750  | 6.743  | 6.961  | 7.430  | 7.442  | 7.296  | 7.103  | 6.204  | 6.141  | 12315 | NA          | NM_007590_7_-1  |
| Calr    | 8.402  | 9.126  | 9.384  | 10.218 | 8.468  | 9.181  | 8.525  | 9.680  | 8.351  | 9.223  | 12317 | CALR        | NM_007591_8_-1  |
| Car8    | -2.362 | -1.656 | -4.878 | -3.777 | -4.987 | -4.700 | -2.618 | -4.224 | -4.981 | -4.342 | 12319 | CAR8        | NM_007592_4_-1  |
| Calu    | 3.881  | 3.455  | 4.845  | 4.924  | 4.646  | 4.183  | 4.459  | 4.752  | 6.019  | 6.229  | 12321 | CALU        | NM_007594_6_+1  |
| Camk2b  | -2.497 | -4.981 | -1.779 | -3.768 | -2.197 | -4.002 | -2.495 | -4.882 | -4.667 | -4.981 | 12323 | CAMK2B      | NM_007595_11_-1 |
| Caml    | 5.675  | 5.542  | 5.029  | 4.853  | 4.688  | 4.548  | 4.553  | 4.373  | 4.194  | 4.064  | 12328 | CAMLG       | NM_007596_13_+1 |
| Canx    | 7.542  | 7.798  | 8.151  | 8.033  | 7.255  | 7.424  | 7.842  | 8.280  | 8.414  | 8.860  | 12330 | CANX        | NM_007597_11_-1 |
| Cap1    | 3.320  | 5.449  | 5.176  | 6.891  | 5.134  | 7.132  | 5.362  | 7.235  | 6.047  | 8.703  | 12331 | CAP1        | NM_007598_4_-1  |
| Capg    | 7.837  | 6.351  | 0.816  | 2.425  | 1.788  | 4.045  | 4.084  | 5.735  | 8.774  | 6.933  | 12332 | CAPG        | NM_007599_6_+1  |
| Capn1   | 2.449  | 1.918  | 3.046  | 3.946  | 1.997  | 2.162  | 2.136  | 4.076  | 4.340  | 5.473  | 12333 | CAPN1       | NM_007600_19_-1 |
| Capn3   | -4.897 | -4.981 | -4.972 | -4.979 | -4.973 | -4.980 | -4.981 | -4.981 | -4.888 | -4.981 | 12335 | CAPN3       | NM_007601_2_+1  |
| Capn5   | 4.008  | 4.071  | -2.970 | -1.110 | -3.137 | -1.673 | -2.522 | -0.259 | -1.284 | -0.182 | 12337 | CAPN5       | NM_007602_7_-1  |
| Capza2  | 8.757  | 8.826  | 9.634  | 9.560  | 9.627  | 9.172  | 9.646  | 9.541  | 9.981  | 10.207 | 12343 | CAPZA2      | NM_007604_6_+1  |
| Car3    | -4.981 | -4.981 | -4.950 | -4.950 | -2.811 | -3.653 | -4.775 | -3.650 | -4.981 | -4.981 | 12350 | CA3         | NM_007606_3_+1  |
| Car5a   | 0.532  | -0.540 | -3.696 | -3.407 | -3.270 | -4.263 | -3.727 | -3.152 | -4.981 | -1.428 | 12352 | CA5A        | NM_007608_8_-1  |
| Casp4   | 2.927  | 2.104  | 3.370  | 3.663  | 3.687  | 3.197  | 4.369  | 4.443  | 5.132  | 5.079  | 12363 | CASP4       | NM_007609_9_+1  |
| Casp2   | 5.014  | 5.166  | 6.173  | 5.745  | 5.129  | 5.117  | 5.602  | 5.729  | 6.677  | 6.495  | 12366 | CASP2       | NM_007610_6_+1  |
| Casp7   | 3.796  | 3.491  | 5.241  | 5.164  | 5.312  | 4.943  | 4.645  | 4.096  | 4.143  | 3.968  | 12369 | CASP7       | NM_007611_19_+1 |
| Ctnnb1  | 3.930  | 4.038  | 5.777  | 5.830  | 4.646  | 4.687  | 4.501  | 5.323  | 6.236  | 6.705  | 12387 | CTNNB1      | NM_007614_9_+1  |
| Ctnnd1  | -4.668 | -4.233 | -4.380 | -4.554 | -4.843 | -3.458 | -3.948 | -4.910 | -4.232 | -4.570 | 12388 | CTNND1      | NM_007615_2_-1  |
| Cav1    | -0.989 | -4.981 | -1.855 | -2.240 | -3.280 | -2.541 | -2.513 | -2.242 | -4.981 | -1.356 | 12389 | CAV1        | NM_007616_6_+1  |
| Cbl     | 4.174  | 4.539  | 5.693  | 5.545  | 5.676  | 5.576  | 5.151  | 5.278  | 6.175  | 6.021  | 12402 | CBL         | NM_007619_9_-1  |
| Cbr1    | 5.679  | 5.551  | 4.205  | 4.443  | 3.551  | 3.816  | 4.029  | 4.114  | 3.010  | 2.874  | 12408 | CBR1        | NM_007620_16_+1 |
| Cbr2    | 2.675  | -0.564 | -0.845 | -0.868 | -0.353 | 0.004  | 0.397  | 2.041  | 3.617  | 3.432  | 12409 | NA          | NM_007621_11_-1 |

|          |        |        |        |        |        |        |        |        |        |        |        |        |                  |
|----------|--------|--------|--------|--------|--------|--------|--------|--------|--------|--------|--------|--------|------------------|
| Cbx1     | 4.868  | 5.357  | 4.560  | 4.936  | 5.101  | 5.332  | 4.554  | 4.740  | 3.233  | 3.746  | 12412  | CBX1   | NM_007622_11_+_1 |
| Cbx2     | -1.671 | -0.167 | 0.442  | -0.096 | 0.717  | -0.695 | -0.188 | -0.329 | 0.758  | 1.577  | 12416  | CBX2   | NM_007623_11_+_1 |
| Cbx3     | 5.818  | 6.751  | 5.562  | 6.429  | 6.030  | 6.631  | 5.944  | 6.385  | 4.273  | 5.455  | 12417  | CBX3   | NM_007624_6_+_1  |
| Cbx4     | 6.009  | 5.841  | 4.197  | 4.479  | 4.646  | 4.779  | 4.935  | 4.854  | 5.493  | 5.146  | 12418  | CBX4   | NM_007625_11_-_1 |
| Cbx5     | 1.058  | -0.860 | -0.466 | -1.312 | -4.256 | -4.931 | -1.440 | -3.944 | -0.076 | -1.362 | 12419  | CBX5   | NM_007626_15_-_1 |
| Ccnb2    | -0.633 | 1.422  | 5.457  | 5.632  | 5.686  | 5.259  | 4.868  | 4.429  | 2.979  | 2.363  | 12442  | CCNB2  | NM_007630_9_-_1  |
| Ccnd1    | 7.714  | 6.104  | 6.300  | 5.917  | 9.130  | 8.659  | 7.730  | 5.474  | 1.283  | -0.525 | 12443  | CCND1  | NM_007631_7_-_1  |
| Ccnd3    | 5.922  | 6.192  | 6.775  | 7.220  | 6.580  | 7.142  | 7.293  | 7.761  | 8.836  | 8.665  | 12445  | CCND3  | NM_007632_17_+_1 |
| Ccne1    | -3.189 | 0.084  | 2.059  | 3.112  | 3.227  | 3.479  | 2.472  | 3.358  | 1.228  | 1.209  | 12447  | CCNE1  | NM_007633_7_-_1  |
| Ccnf     | -0.054 | -0.447 | 1.639  | 1.965  | 4.134  | 3.035  | 3.326  | 2.664  | 2.402  | 1.574  | 12449  | CCNF   | NM_007634_17_-_1 |
| Ccng2    | 6.139  | 6.732  | 6.307  | 6.498  | 4.861  | 4.990  | 5.581  | 5.554  | 6.418  | 6.486  | 12452  | CCNG2  | NM_007635_5_+_1  |
| Cct2     | 7.144  | 7.257  | 7.549  | 7.613  | 7.420  | 7.402  | 7.300  | 7.222  | 6.630  | 6.766  | 12461  | CCT2   | NM_007636_10_-_1 |
| Cct5     | 8.691  | 8.621  | 8.212  | 8.374  | 8.009  | 8.019  | 7.904  | 8.151  | 7.625  | 7.701  | 12465  | CCT5   | NM_007637_15_-_1 |
| Cct7     | 7.889  | 8.031  | 8.012  | 8.208  | 7.910  | 8.002  | 7.656  | 7.887  | 7.437  | 7.415  | 12468  | CCT7   | NM_007638_6_+_1  |
| Cd1d1    | 4.888  | 5.403  | 7.980  | 8.077  | 6.183  | 6.129  | 5.278  | 5.831  | 2.559  | 3.453  | 12479  | CD1D   | NM_007639_3_-_1  |
| Cd1d2    | -4.770 | -0.783 | -0.064 | 0.286  | -1.130 | -1.827 | -4.109 | -2.698 | -4.981 | -4.955 | 12480  | NA     | NM_007640_3_+_1  |
| Ms4a1    | 2.505  | 0.046  | 5.682  | 5.506  | 4.307  | 5.510  | 3.908  | 7.045  | 0.778  | 2.522  | 12482  | MS4A1  | NM_007641_19_-_1 |
| Cd28     | 6.001  | 6.683  | -2.501 | 0.269  | -1.205 | 1.146  | 1.303  | 3.903  | -2.384 | -1.063 | 12487  | CD28   | NM_007642_1_+_1  |
| Cd36     | 3.242  | 5.541  | 6.905  | 6.839  | -0.945 | 1.203  | 5.509  | 5.398  | 5.706  | 3.529  | 12491  | CD36   | NM_007643_5_-_1  |
| Scarb2   | 7.533  | 7.276  | 6.426  | 6.713  | 4.609  | 4.778  | 5.956  | 6.456  | 6.979  | 7.136  | 12492  | SCARB2 | NM_007644_5_-_1  |
| Cd37     | 8.664  | 8.903  | 5.962  | 6.185  | 6.223  | 6.515  | 6.390  | 7.159  | 5.908  | 5.835  | 12493  | CD37   | NM_007645_7_-_1  |
| Cd38     | 6.719  | 6.499  | 6.316  | 6.514  | 3.819  | 4.917  | 3.902  | 5.996  | 1.231  | 2.654  | 12494  | CD38   | NM_007646_5_+_1  |
| Entpd5   | -1.612 | 1.142  | 2.173  | 2.508  | -0.671 | 0.776  | 1.238  | 1.285  | 2.230  | 3.165  | 12499  | ENTPD5 | NM_007647_12_-_1 |
| Cd3e     | 0.638  | 0.289  | -3.484 | 1.213  | -0.425 | 2.783  | 0.715  | 3.894  | -0.946 | 0.592  | 12501  | CD3E   | NM_007648_9_-_1  |
| Cd48     | 8.865  | 9.234  | 8.605  | 8.145  | 8.618  | 8.306  | 8.570  | 8.633  | 8.411  | 8.116  | 12506  | CD48   | NM_007649_1_+_1  |
| Cd5      | 2.410  | 3.099  | 2.536  | 3.203  | 4.680  | 4.694  | 3.264  | 3.024  | -0.348 | -1.010 | 12507  | CD5    | NM_007650_19_-_1 |
| Cd53     | 10.193 | 10.324 | 9.173  | 9.190  | 9.257  | 9.475  | 9.465  | 9.751  | 9.807  | 10.066 | 12508  | CD53   | NM_007651_3_-_1  |
| Cd59a    | 2.612  | 6.761  | -1.155 | 1.376  | -1.241 | 1.331  | -2.455 | 1.998  | -2.736 | -0.387 | 12509  | NA     | NM_007652_2_+_1  |
| Cd63     | 3.162  | 1.213  | 6.574  | 7.038  | 6.012  | 6.213  | 7.005  | 5.983  | 4.004  | 0.734  | 12512  | CD63   | NM_007653_10_+_1 |
| Cd72     | 6.164  | 5.952  | -0.999 | 2.401  | 5.218  | 6.505  | 4.163  | 6.260  | -2.336 | 2.692  | 12517  | CD72   | NM_007654_4_-_1  |
| Cd79a    | 4.681  | 2.263  | 2.340  | 4.951  | 4.145  | 7.073  | 5.383  | 8.672  | 1.872  | 2.792  | 12518  | CD79A  | NM_007655_7_+_1  |
| Cd82     | 5.724  | 5.816  | 6.479  | 6.508  | 7.003  | 7.518  | 6.505  | 6.361  | 4.947  | 4.999  | 12521  | CD82   | NM_007656_2_-_1  |
| Cd9      | 3.535  | 2.772  | 9.333  | 9.015  | 8.129  | 8.004  | 8.187  | 7.718  | 5.407  | 4.399  | 12527  | CD9    | NM_007657_6_-_1  |
| Cdc25a   | 3.615  | 3.261  | 4.736  | 4.907  | 3.993  | 4.056  | 3.557  | 3.839  | 3.488  | 3.182  | 12530  | CDC25A | NM_007658_9_+_1  |
| Cdk1     | 2.135  | 2.558  | 4.871  | 5.307  | 5.165  | 4.944  | 4.508  | 4.385  | 2.247  | 1.468  | 12534  | CDK1   | NM_007659_10_-_1 |
| Cdk11b   | 6.100  | 5.988  | 5.918  | 5.801  | 6.513  | 6.444  | 6.516  | 6.086  | 6.203  | 5.752  | 12537  | CDK11A | NM_007661_4_+_1  |
| Cdh15    | -4.981 | -4.981 | -0.368 | -2.537 | -4.934 | -4.934 | -4.821 | -4.901 | -4.981 | -4.981 | 12555  | CDH15  | NM_007662_8_+_1  |
| Cdh2     | -4.981 | -4.981 | -3.954 | -2.541 | -1.382 | 0.365  | -1.137 | -1.250 | -4.394 | -4.981 | 12558  | CDH2   | NM_007664_18_-_1 |
| Cdk5     | 5.691  | 5.792  | 5.175  | 5.083  | 5.386  | 5.509  | 5.117  | 5.019  | 4.917  | 4.907  | 12568  | CDK5   | NM_007668_5_-_1  |
| Cdkn1a   | 2.330  | 3.856  | 5.804  | 6.017  | 4.904  | 4.794  | 6.521  | 6.416  | 6.710  | 6.886  | 12575  | CDKN1A | NM_007669_17_+_1 |
| Cdkn2b   | -0.744 | -4.981 | 2.197  | 3.929  | 4.309  | 4.321  | 1.025  | 0.682  | -3.109 | -4.981 | 12579  | CDKN2B | NM_007670_4_-_1  |
| Cdkn2c   | 5.809  | 6.127  | 2.822  | 2.457  | 3.505  | 3.166  | 3.028  | 2.487  | 2.188  | 1.708  | 12580  | CDKN2C | NM_007671_4_-_1  |
| Cdr2     | -2.164 | 0.507  | 0.322  | 2.209  | -0.889 | 1.850  | -0.548 | 2.176  | 0.550  | 1.554  | 12585  | CDR2   | NM_007672_7_-_1  |
| Cdx4     | -4.981 | -4.981 | -4.970 | -3.406 | -4.817 | -1.202 | -4.886 | -4.623 | -4.981 | -4.981 | 12592  | CDX4   | NM_007674_X_+_1  |
| Ceacam10 | -4.981 | -2.340 | -1.974 | -2.957 | -4.886 | -3.324 | -4.456 | 0.140  | -0.825 | 3.132  | 26366  | NA     | NM_007675_7_+_1  |
| Cebpa    | -0.206 | -1.352 | -1.276 | -1.796 | -1.156 | -2.154 | 0.444  | 0.257  | 2.280  | 2.296  | 12606  | CEBPA  | NM_007678_7_+_1  |
| Cebpd    | 5.432  | 5.884  | 3.373  | 3.360  | 4.785  | 5.126  | 5.583  | 5.713  | 6.804  | 6.960  | 12609  | CEBPD  | NM_007679_16_+_1 |
| Ephb6    | -3.806 | -0.213 | -2.951 | -2.668 | -4.911 | -4.219 | -3.141 | -2.912 | -1.486 | -1.666 | 13848  | EPHB6  | NM_007680_6_+_1  |
| Cenpa    | 3.076  | 3.404  | 4.105  | 4.168  | 4.617  | 4.107  | 4.185  | 3.845  | 3.345  | 2.628  | 12615  | CENPA  | NM_007681_5_+_1  |
| Cenpb    | 3.806  | 3.571  | 3.933  | 3.871  | 3.072  | 2.881  | 3.928  | 3.864  | 4.860  | 4.451  | 12616  | CENPB  | NM_007682_2_-_1  |
| Cenpc1   | 3.051  | 3.503  | 3.236  | 3.489  | 3.391  | 3.364  | 2.938  | 3.226  | 2.647  | 2.731  | 12617  | CENPC  | NM_007683_5_-_1  |
| Cetn3    | 6.949  | 7.167  | 6.727  | 6.635  | 6.843  | 6.813  | 6.966  | 6.666  | 5.665  | 5.994  | 12626  | CETN3  | NM_007684_13_+_1 |
| Cfl1     | 10.139 | 10.126 | 11.052 | 11.017 | 11.029 | 10.753 | 10.468 | 10.586 | 10.643 | 10.484 | 12631  | CFL1   | NM_007687_19_+_1 |
| Cfl2     | 4.972  | 5.035  | 4.527  | 4.132  | 4.708  | 4.533  | 4.702  | 4.299  | 4.302  | 4.203  | 12632  | CFL2   | NM_007688_12_-_1 |
| Chad     | -4.981 | -4.981 | -3.743 | -1.868 | -4.628 | -3.160 | -4.970 | -4.308 | -4.981 | -3.449 | 12643  | CHAD   | NM_007689_11_+_1 |
| Chd1     | 4.953  | 4.995  | 5.700  | 5.722  | 5.979  | 6.051  | 5.756  | 5.722  | 5.864  | 6.163  | 12648  | CHD1   | NM_007690_17_+_1 |
| Chek1    | -3.668 | -0.759 | 1.372  | 1.560  | 2.632  | 2.195  | 2.273  | 1.566  | -1.455 | -0.372 | 12649  | CHEK1  | NM_007691_9_-_1  |
| Chkb     | 4.758  | 4.991  | 4.910  | 4.589  | 4.542  | 4.420  | 4.713  | 4.235  | 4.558  | 4.575  | 12651  | CHKB   | NM_007692_15_-_1 |
| Chgb     | -2.948 | -4.981 | -4.349 | -4.956 | -4.556 | -4.958 | -4.954 | -4.968 | -3.373 | -3.853 | 12653  | CHGB   | NM_007694_2_+_1  |
| Chil1    | -3.843 | -4.981 | -2.083 | 0.968  | -1.939 | 2.131  | 1.039  | 5.237  | 8.861  | 9.763  | 12654  | CHI3L1 | NM_007695_1_+_1  |
| Ovgp1    | -2.501 | -0.451 | -0.504 | -0.337 | -0.892 | -0.918 | -0.403 | 0.012  | 0.705  | 0.320  | 12659  | OVGP1  | NM_007696_3_+_1  |
| Chl1     | -0.403 | -4.981 | -4.025 | -0.943 | -3.994 | -4.464 | -4.661 | -3.445 | -4.981 | -2.988 | 12661  | CHL1   | NM_007697_6_+_1  |
| Chuk     | 6.490  | 6.571  | 7.308  | 6.969  | 6.940  | 6.833  | 6.412  | 5.817  | 5.906  | 6.163  | 12675  | CHUK   | NM_007700_19_-_1 |
| Cidea    | -4.981 | -4.981 | -2.564 | -1.388 | -4.906 | -4.987 | -4.978 | -4.841 | -4.981 | -3.853 | 12683  | CIDEA  | NM_007702_18_+_1 |
| Patj     | -4.981 | -4.981 | -2.669 | -2.565 | -2.758 | -2.734 | -3.242 | -4.369 | -3.656 | -3.918 | 12695  | PATJ   | NM_007704_4_+_1  |
| Cirbp    | 8.357  | 8.160  | 6.139  | 5.811  | 7.072  | 6.955  | 6.746  | 6.304  | 6.230  | 4.803  | 12696  | CIRBP  | NM_007705_10_+_1 |
| Socs2    | -0.123 | -0.660 | 5.305  | 5.217  | 5.651  | 5.474  | 4.552  | 3.316  | -4.981 | -2.587 | 216233 | SOCS2  | NM_007706_10_-_1 |
| Socs3    | 4.641  | 4.798  | 1.574  | 2.044  | 2.881  | 3.152  | 5.504  | 5.857  | 6.718  | 6.991  | 12702  | SOCS3  | NM_007707_11_-_1 |
| Cit      | -0.861 | -2.616 | 0.864  | 1.404  | 2.724  | 1.952  | 1.604  | 0.690  | -0.068 | -0.371 | 12704  | CIT    | NM_007708_5_+_1  |
| Cited1   | -4.981 | -4.981 | -4.981 | -4.981 | -4.981 | -4.981 | -4.981 | -4.981 | -4.981 | -4.981 | 12705  | CITED1 | NM_007709_X_-_1  |
| Ckm      | -4.981 | -4.981 | 0.363  | -4.972 | -1.988 | -4.475 | -0.237 | -3.787 | -1.469 | -4.981 | 12715  | CKM    | NM_007710_7_+_1  |
| Cln3     | 3.150  | 3.251  | 4.066  | 4.159  | 3.130  | 3.561  | 3.508  | 3.703  | 4.298  | 4.079  | 12725  | CLCN3  | NM_007711_8_-_1  |
| Clk2     | 4.917  | 5.288  | 4.837  | 4.960  | 5.190  | 5.225  | 4.816  | 5.008  | 4.927  | 4.931  | 12748  | CLK2   | NM_007712_3_+_1  |
| Clk3     | 6.882  | 7.132  | 6.246  | 6.292  | 6.359  | 6.473  | 6.514  | 6.550  | 6.963  | 6.833  | 102414 | CLK3   | NM_007713_9_-_1  |

|         |        |        |        |        |        |        |        |        |        |        |        |         |                 |
|---------|--------|--------|--------|--------|--------|--------|--------|--------|--------|--------|--------|---------|-----------------|
| Clk4    | 6.005  | 6.343  | 5.605  | 5.389  | 5.971  | 6.056  | 5.757  | 5.792  | 5.669  | 5.657  | 12750  | CLK4    | NM_007714_11_+1 |
| Clock   | 0.957  | 2.619  | 1.733  | 1.766  | 2.074  | 2.484  | 2.106  | -0.102 | 1.320  | 2.742  | 12753  | CLOCK   | NM_007715_5_-1  |
| Cmah    | 0.045  | 0.868  | -0.245 | 1.989  | -1.559 | 4.843  | 1.999  | 4.684  | 0.190  | 0.295  | 12763  | NA      | NM_007717_13_+1 |
| Ccr1l1  | -1.334 | -2.136 | -3.757 | -3.252 | -2.839 | -4.867 | -3.491 | -3.795 | -2.898 | -4.981 | 12770  | NA      | NM_007718_9_-1  |
| Ccr7    | 5.159  | 2.519  | 8.944  | 8.854  | 9.510  | 8.977  | 8.079  | 7.420  | -0.177 | 1.520  | 12775  | CCR7    | NM_007719_11_-1 |
| Ccr8    | -2.739 | -2.349 | -3.908 | -2.583 | -3.836 | -3.056 | -4.982 | -1.699 | -4.981 | -3.855 | 12776  | CCR8    | NM_007720_9_+1  |
| Ccr10   | -1.102 | 0.760  | -3.537 | -1.298 | -2.250 | -3.554 | 0.313  | 3.305  | -3.109 | -3.480 | 12777  | CCR10   | NM_007721_11_-1 |
| Ackr3   | -0.864 | -1.402 | -5.007 | -0.736 | -1.742 | 1.655  | -1.696 | 1.570  | -3.153 | -2.309 | 12778  | ACKR3   | NM_007722_1_+1  |
| Cnga1   | -4.981 | -4.981 | -4.968 | -4.507 | -4.958 | -3.908 | -3.106 | -1.256 | -4.981 | -4.981 | 12788  | CNGA1   | NM_007723_5_-1  |
| Cnga2   | -4.981 | -4.981 | -3.037 | 2.165  | -2.996 | -1.457 | -4.956 | -3.080 | -4.981 | -4.981 | 12789  | CNGA2   | NM_007724_X_+1  |
| Cnn2    | 7.747  | 7.656  | 9.338  | 9.503  | 9.826  | 9.646  | 9.318  | 9.161  | 9.037  | 8.974  | 12798  | CNN2    | NM_007725_10_+1 |
| Cnr1    | -4.981 | -4.981 | -4.106 | -4.978 | -2.058 | -0.651 | -4.974 | -2.339 | -4.981 | -4.981 | 12801  | CNR1    | NM_007726_4_+1  |
| Cntn1   | -3.452 | -4.981 | -4.622 | -4.013 | -4.345 | -3.985 | -4.957 | -3.968 | -4.981 | -4.981 | 12805  | CNTN1   | NM_007727_15_+1 |
| Coch    | -4.455 | -4.202 | -3.495 | -4.848 | -4.880 | -4.958 | -4.643 | -3.047 | -4.608 | -4.933 | 12810  | COCH    | NM_007728_12_+1 |
| Col17a1 | 2.719  | 5.784  | -3.151 | -2.880 | 1.230  | 4.038  | -0.578 | 0.151  | -2.194 | -1.862 | 12821  | NA      | NM_007732_19_-1 |
| Col19a1 | -4.981 | -4.981 | -4.325 | -4.218 | -4.094 | -4.972 | -4.926 | -4.168 | -4.981 | -4.981 | 12823  | COL19A1 | NM_007733_1_-1  |
| Col4a3  | -0.950 | -1.972 | -2.680 | -4.505 | -2.768 | -4.927 | -1.074 | -4.959 | -1.429 | -4.227 | 12828  | COL4A3  | NM_007734_1_+1  |
| Col4a4  | -1.670 | -4.981 | -4.697 | -2.410 | -4.410 | -4.818 | -4.509 | -4.871 | -4.981 | -3.209 | 12829  | COL4A4  | NM_007735_1_-1  |
| Col4a5  | -3.729 | -4.981 | -4.981 | -4.981 | -4.968 | -4.334 | -4.801 | -2.650 | -4.981 | -4.981 | 12830  | COL4A5  | NM_007736_X_+1  |
| Col7a1  | -2.948 | -1.159 | -1.269 | -2.021 | -2.616 | -2.652 | -2.719 | -0.769 | -0.382 | 0.522  | 12836  | COL7A1  | NM_007738_9_+1  |
| Col9a1  | -4.981 | -4.981 | -4.981 | -4.981 | -4.961 | -4.961 | -4.981 | -4.981 | -4.981 | -4.981 | 12839  | COL9A1  | NM_007740_1_+1  |
| Col9a2  | -4.981 | -4.981 | -3.984 | -3.367 | -2.273 | -4.057 | -4.911 | -4.944 | -4.981 | -4.342 | 12840  | COL9A2  | NM_007741_4_+1  |
| Col1a1  | -4.981 | -4.981 | -4.739 | -4.641 | -4.928 | -3.395 | -4.455 | -4.935 | -4.981 | -3.853 | 12842  | COL1A1  | NM_007742_11_+1 |
| Comt    | 2.027  | 2.543  | 0.968  | 1.623  | 1.133  | 2.300  | 1.492  | 2.563  | 2.908  | 3.138  | 12846  | COMT    | NM_007744_16_-1 |
| Cort    | -4.981 | -4.981 | -4.969 | -4.969 | -4.194 | -4.741 | -4.969 | -4.793 | -4.981 | -4.316 | 12854  | CORT    | NM_007745_4_-1  |
| Map3k8  | 7.035  | 6.426  | 6.088  | 5.650  | 7.013  | 7.070  | 6.744  | 6.518  | 5.905  | 6.003  | 26410  | MAP3K8  | NM_007746_18_-1 |
| Cox5a   | 8.478  | 8.299  | 8.250  | 8.264  | 8.198  | 8.322  | 8.514  | 8.438  | 7.186  | 7.312  | 12858  | COX5A   | NM_007747_9_+1  |
| Cox6a1  | 8.848  | 8.767  | 8.677  | 8.553  | 8.697  | 8.625  | 8.793  | 8.675  | 7.970  | 7.617  | 12861  | COX6A1  | NM_007748_5_-1  |
| Cox7c   | 7.835  | 7.654  | 8.218  | 7.995  | 7.523  | 7.616  | 7.804  | 7.518  | 6.545  | 6.541  | 12867  | NA      | NM_007749_13_-1 |
| Cox8a   | 9.090  | 8.962  | 8.668  | 8.589  | 8.528  | 8.537  | 8.722  | 8.655  | 8.065  | 7.859  | 12868  | COX8A   | NM_007750_19_-1 |
| Cp      | -1.436 | -4.981 | -0.034 | -0.132 | -3.955 | -4.960 | -0.210 | -0.496 | -3.750 | -4.981 | 12870  | CP      | NM_007752_3_+1  |
| Cpa3    | -4.981 | -4.981 | -2.757 | -4.289 | -4.334 | 0.303  | 2.940  | -2.486 | -4.981 | -4.981 | 12873  | CPA3    | NM_007753_3_-1  |
| Cpd     | 0.313  | 0.502  | 3.462  | 3.819  | 0.964  | 2.635  | 3.315  | 3.846  | 5.371  | 5.279  | 12874  | CPD     | NM_007754_11_-1 |
| CpoX    | 4.897  | 5.115  | 3.644  | 4.809  | 3.288  | 4.755  | 3.958  | 5.262  | 3.989  | 4.669  | 12892  | CPOX    | NM_007757_16_+1 |
| Cr2     | -1.598 | -0.933 | -1.714 | 2.052  | 2.473  | 5.280  | 1.946  | 5.796  | -0.977 | 2.191  | 12902  | CR2     | NM_007758_1_-1  |
| Crat    | 3.275  | 3.398  | 3.682  | 4.885  | 2.567  | 3.936  | 3.204  | 4.759  | 5.479  | 5.897  | 12908  | CRAT    | NM_007760_2_-1  |
| Crcp    | 5.476  | 5.397  | 5.714  | 5.720  | 5.326  | 5.181  | 5.273  | 5.373  | 5.261  | 5.156  | 12909  | CRCP    | NM_007761_5_+1  |
| Crip1   | 7.735  | 7.423  | 9.951  | 9.580  | 6.376  | 6.639  | 9.627  | 10.364 | 10.431 | 10.357 | 12925  | CRIP1   | NM_007763_12_+1 |
| Crkl    | 4.920  | 5.181  | 5.542  | 5.485  | 5.662  | 5.555  | 5.455  | 5.432  | 5.741  | 5.737  | 12929  | CRKL    | NM_007764_16_+1 |
| Crmp1   | -3.719 | -1.799 | -4.943 | -4.639 | -3.745 | -4.555 | -3.366 | -2.397 | -4.981 | -4.981 | 12933  | CRMP1   | NM_007765_5_+1  |
| Cry1    | 3.651  | 3.743  | 3.440  | 3.741  | 4.191  | 3.804  | 3.772  | 3.808  | 4.472  | 4.060  | 12952  | CRY1    | NM_007771_10_-1 |
| Hivep1  | 5.448  | 5.239  | 5.128  | 4.816  | 5.275  | 5.096  | 4.970  | 4.258  | 3.570  | 3.797  | 110521 | HIVEP1  | NM_007772_13_+1 |
| Crybb2  | -4.981 | -4.981 | -4.981 | -4.981 | -4.111 | -0.669 | -4.958 | -4.941 | -4.981 | -4.981 | 12961  | CRYBB2  | NM_007773_5_-1  |
| Csf1    | -0.864 | -1.332 | -0.462 | 1.001  | -0.250 | -0.926 | 3.125  | -0.786 | 1.910  | 0.775  | 12977  | CSF1    | NM_007778_3_-1  |
| Csf2rb  | 7.834  | 7.742  | 7.480  | 7.349  | 7.724  | 6.425  | 8.200  | 7.965  | 8.366  | 8.581  | 12983  | CSF2RB  | NM_007780_15_+1 |
| Csf2rb2 | 6.689  | 6.006  | 4.737  | 4.345  | 4.140  | 2.642  | 5.043  | 4.384  | 4.461  | 5.364  | 12984  | CSF2RB  | NM_007781_15_-1 |
| Csf3r   | -0.855 | -4.722 | -1.908 | 1.373  | 1.430  | 2.839  | 4.945  | 5.804  | 8.000  | 8.473  | 12986  | CSF3R   | NM_007782_4_+1  |
| Csk     | 6.418  | 6.247  | 5.973  | 5.691  | 6.626  | 6.688  | 6.821  | 6.734  | 7.142  | 6.924  | 12988  | CSK     | NM_007783_9_-1  |
| Csnk2a1 | 5.199  | 4.739  | 5.590  | 4.828  | 5.539  | 4.933  | 5.407  | 4.564  | 4.516  | 4.149  | 12995  | CSNK2A1 | NM_007788_2_+1  |
| Smc3    | 6.432  | 6.518  | 6.150  | 5.942  | 6.731  | 6.530  | 6.537  | 6.192  | 5.936  | 5.868  | 13006  | SMC3    | NM_007790_19_+1 |
| Csrp1   | 5.668  | 4.345  | 6.421  | 5.371  | 6.189  | 4.214  | 5.964  | 3.841  | 4.511  | 2.600  | 13007  | CSR1P   | NM_007791_1_+1  |
| Csrp2   | -0.154 | 0.614  | 2.914  | 2.145  | 1.157  | 0.286  | 2.595  | 2.528  | 3.065  | 3.115  | 13008  | CSR2P   | NM_007792_10_+1 |
| Cstb    | 7.498  | 7.491  | 6.883  | 7.134  | 5.910  | 6.297  | 6.891  | 7.094  | 6.835  | 7.185  | 13014  | CSTB    | NM_007793_10_+1 |
| Ctf1    | -4.981 | -4.981 | -4.982 | -2.925 | -4.931 | -4.188 | -4.439 | -3.712 | -3.304 | -1.996 | 13019  | CTF1    | NM_007795_7_+1  |
| Ctla2a  | 2.347  | 2.408  | 1.352  | 2.347  | 1.839  | 2.681  | 2.804  | 2.927  | 2.669  | 3.152  | 13024  | NA      | NM_007796_13_-1 |
| Ctla2b  | -1.776 | -4.770 | 3.886  | 4.669  | -2.581 | -2.489 | -2.344 | -0.575 | -0.695 | -1.858 | 13025  | NA      | NM_007797_13_-1 |
| Ctsb    | 11.260 | 11.445 | 9.398  | 9.668  | 9.408  | 9.295  | 10.000 | 10.508 | 11.742 | 11.404 | 13030  | CTSB    | NM_007798_14_+1 |
| Ctse    | 8.773  | 4.532  | 6.524  | 5.158  | 4.370  | 5.561  | 5.131  | 5.982  | 7.974  | 4.063  | 13034  | CTSE    | NM_007799_1_+1  |
| Ctsg    | -4.981 | -4.981 | -4.562 | -2.050 | -4.972 | 1.924  | 0.334  | 1.668  | 2.190  | 1.191  | 13035  | CTSG    | NM_007800_14_-1 |
| Ctsh    | 11.366 | 11.319 | 9.123  | 9.360  | 9.981  | 9.914  | 9.927  | 9.912  | 9.605  | 9.825  | 13036  | CTSH    | NM_007801_9_+1  |
| Ctsk    | -2.164 | -4.981 | -4.270 | -4.983 | -3.644 | -4.944 | -1.575 | -4.161 | -0.353 | -4.981 | 13038  | CTSK    | NM_007802_3_+1  |
| Cttn    | -4.587 | -4.374 | -4.521 | -4.669 | -4.837 | -4.310 | -3.324 | -3.384 | -4.813 | -4.753 | 13043  | CTTN    | NM_007803_7_-1  |
| Cyb561  | -2.071 | -2.437 | 2.822  | 2.738  | -1.411 | -1.142 | 1.404  | 1.786  | 1.986  | 1.959  | 13056  | CYB561  | NM_007805_11_-1 |
| Cyba    | 9.862  | 9.530  | 9.177  | 9.230  | 9.893  | 9.884  | 10.182 | 9.891  | 9.896  | 9.515  | 13057  | CYBA    | NM_007806_8_-1  |
| Cybb    | 9.891  | 9.998  | 6.614  | 6.094  | 8.355  | 5.346  | 9.828  | 9.900  | 12.408 | 12.388 | 13058  | CYBB    | NM_007807_X_-1  |
| Cycc    | 8.489  | 8.430  | 9.168  | 9.222  | 8.303  | 8.266  | 8.704  | 8.519  | 7.854  | 7.725  | 13063  | CYCS    | NM_007808_6_-1  |
| Cyp17a1 | -4.981 | -4.981 | -4.981 | -4.981 | -4.978 | -4.978 | -4.772 | -4.975 | -3.322 | -3.855 | 13074  | CYP17A1 | NM_007809_19_-1 |
| Cyp26a1 | -4.981 | -4.981 | -4.971 | -3.982 | -3.738 | -4.969 | -4.768 | -4.122 | -4.981 | -3.853 | 13082  | CYP26A1 | NM_007811_19_+1 |
| Cyp3a13 | -4.981 | -4.981 | -4.981 | -4.981 | -4.742 | -4.902 | -4.178 | -4.481 | -3.373 | -4.342 | 13113  | CYP3A7  | NM_007819_5_-1  |
| Cyp7b1  | 2.802  | 2.644  | 3.408  | 3.593  | -3.218 | -1.497 | -1.465 | -0.013 | 0.947  | 1.652  | 13123  | CYP7B1  | NM_007825_3_-1  |
| Dach1   | -4.981 | -4.981 | -4.957 | -4.696 | -4.979 | -4.913 | -4.980 | -4.958 | -4.605 | -4.307 | 13134  | DACH1   | NM_007826_14_-1 |
| Dapk3   | -3.311 | -2.984 | -0.268 | -0.284 | -0.451 | -1.979 | -2.695 | -1.184 | -3.568 | 0.071  | 13144  | DAPK3   | NM_007828_10_+1 |
| Daxx    | 4.727  | 4.651  | 4.927  | 4.596  | 4.692  | 4.417  | 5.128  | 4.895  | 6.585  | 5.772  | 13163  | DAXX    | NM_007829_17_+1 |
| Dbi     | 6.816  | 6.717  | 6.939  | 6.642  | 5.886  | 5.708  | 7.177  | 7.094  | 7.510  | 7.386  | 13167  | DBI     | NM_007830_1_-1  |

|          |        |        |        |        |        |        |        |        |        |        |       |          |                 |
|----------|--------|--------|--------|--------|--------|--------|--------|--------|--------|--------|-------|----------|-----------------|
| Dck      | 3.976  | 3.911  | 5.491  | 5.024  | 5.594  | 4.881  | 5.869  | 5.806  | 7.209  | 6.825  | 13178 | DCK      | NM_007832_5_+1  |
| Dscr3    | 5.619  | 5.896  | 5.934  | 5.929  | 5.559  | 5.349  | 5.777  | 5.825  | 6.200  | 6.167  | 13185 | DSCR3    | NM_007834_16_-1 |
| Dctn1    | -4.795 | -4.637 | -4.678 | -4.869 | -3.690 | -4.984 | -3.753 | -4.889 | -1.324 | -4.961 | 13191 | DCTN1    | NM_007835_6_+1  |
| Gadd45a  | 3.699  | 3.190  | 2.751  | 3.691  | 1.810  | 2.691  | 2.459  | 3.370  | 3.828  | 3.220  | 13197 | GADD45A  | NM_007836_6_-1  |
| Ddit3    | 5.072  | 5.574  | 3.921  | 4.048  | 4.734  | 4.806  | 5.026  | 4.547  | 3.214  | 3.107  | 13198 | DDIT3    | NM_007837_10_+1 |
| Ddost    | 8.963  | 8.783  | 8.431  | 8.539  | 8.078  | 8.122  | 7.904  | 8.267  | 7.937  | 7.893  | 13200 | DDOST    | NM_007838_4_+1  |
| Dhx15    | 6.501  | 6.542  | 6.888  | 6.838  | 7.014  | 6.959  | 6.959  | 6.783  | 6.635  | 6.808  | 13204 | DHX15    | NM_007839_5_-1  |
| Ddx5     | 9.906  | 10.105 | 9.721  | 9.765  | 10.155 | 10.466 | 9.669  | 9.783  | 9.164  | 9.582  | 13207 | DDX5     | NM_007840_11_-1 |
| Ddx6     | 3.961  | 3.317  | 2.870  | 3.386  | 3.162  | 4.247  | 3.539  | 3.404  | 3.027  | 3.036  | 13209 | DDX6     | NM_007841_9_+1  |
| Dhx9     | 5.279  | 4.934  | 5.136  | 5.081  | 5.579  | 5.603  | 4.904  | 4.628  | 3.406  | 3.956  | 13211 | DHX9     | NM_007842_1_-1  |
| Degs1    | 7.753  | 8.424  | 7.081  | 7.107  | 7.735  | 7.844  | 8.078  | 8.382  | 9.199  | 9.148  | 13244 | DEGS1    | NM_007853_1_-1  |
| Slc29a2  | 1.001  | 1.411  | 0.158  | 0.122  | 0.919  | 0.552  | 1.240  | 0.743  | -0.017 | -0.052 | 13340 | SLC29A2  | NM_007854_19_+1 |
| Dhcr7    | 4.863  | 4.854  | 2.979  | 2.917  | 2.635  | 2.972  | 2.683  | 3.581  | 3.529  | 3.788  | 13360 | DHCR7    | NM_007856_7_+1  |
| Dhh      | -2.739 | -4.981 | -4.956 | -4.831 | -4.975 | -4.696 | -4.920 | -4.865 | -3.925 | -4.981 | 13363 | DHH      | NM_007857_15_-1 |
| Diaph1   | 5.734  | 5.425  | 5.101  | 4.626  | 5.416  | 5.118  | 5.469  | 4.931  | 6.274  | 5.700  | 13367 | DIAPH1   | NM_007858_18_-1 |
| Dffb     | 4.324  | 4.401  | 3.813  | 3.833  | 4.068  | 3.895  | 3.818  | 3.588  | 4.026  | 3.809  | 13368 | DFFB     | NM_007859_4_-1  |
| Dld      | 6.431  | 6.427  | 6.457  | 6.597  | 6.282  | 6.345  | 6.209  | 6.411  | 6.068  | 6.657  | 13382 | DLD      | NM_007861_12_-1 |
| Dlg1     | 2.365  | 1.045  | 2.778  | 3.075  | 2.426  | 2.360  | 1.502  | 1.640  | 2.658  | 2.682  | 13383 | DLG1     | NM_007862_16_+1 |
| Mpp3     | -4.981 | -4.981 | -4.969 | -3.286 | -3.960 | -4.865 | -4.953 | -3.674 | -4.981 | -3.498 | 13384 | MPP3     | NM_007863_11_-1 |
| Dlg4     | -1.562 | -2.026 | -1.624 | -3.484 | -2.340 | -1.565 | -1.593 | -2.574 | -1.344 | -1.691 | 13385 | DLG4     | NM_007864_11_+1 |
| Dll1     | 2.421  | 3.167  | -3.754 | -2.867 | -4.366 | -3.301 | -2.857 | -2.284 | -2.501 | -2.988 | 13388 | DLL1     | NM_007865_17_-1 |
| Dmd      | -2.178 | -4.981 | -1.210 | -0.630 | -2.530 | -3.526 | -3.955 | -1.407 | -4.981 | -4.981 | 13405 | DMD      | NM_007868_X_+1  |
| Dnajc1   | 5.666  | 5.617  | 5.189  | 5.190  | 4.942  | 5.191  | 4.847  | 4.391  | 4.355  | 4.348  | 13418 | DNAJC1   | NM_007869_2_-1  |
| Dnase1l3 | 4.725  | 4.077  | 9.951  | 10.861 | 8.508  | 9.654  | 8.144  | 8.560  | -0.555 | 0.436  | 13421 | DNASE1L3 | NM_007870_14_-1 |
| Dnm2     | 2.131  | 3.573  | 3.155  | 3.290  | 3.347  | 4.035  | 3.013  | 4.028  | 5.787  | 5.940  | 13430 | DNM2     | NM_007871_9_+1  |
| Dnmt3a   | 3.484  | 3.030  | 4.404  | 4.276  | 5.182  | 5.514  | 5.097  | 4.989  | 4.474  | 4.509  | 13435 | DNMT3A   | NM_007872_12_+1 |
| Reep5    | 7.906  | 7.527  | 6.804  | 6.648  | 6.430  | 6.262  | 6.815  | 7.018  | 7.563  | 7.343  | 13476 | REEP5    | NM_007874_18_-1 |
| Dpagt1   | 5.323  | 5.342  | 5.656  | 5.858  | 4.102  | 4.421  | 4.578  | 5.341  | 5.229  | 5.546  | 13478 | DPAGT1   | NM_007875_9_+1  |
| Drd4     | -1.190 | -1.045 | -3.075 | -4.911 | -4.941 | -4.941 | -4.930 | -4.949 | -4.981 | -4.981 | 13491 | DRD4     | NM_007878_7_+1  |
| Drg1     | 7.096  | 7.017  | 6.669  | 6.747  | 6.887  | 6.815  | 6.786  | 6.767  | 6.338  | 6.330  | 13494 | DRG1     | NM_007879_11_-1 |
| Arid3a   | 5.025  | 5.270  | 2.511  | 3.018  | 3.317  | 3.163  | 3.756  | 3.778  | 6.172  | 5.700  | 13496 | ARID3A   | NM_007880_10_+1 |
| Atn1     | 1.385  | 1.536  | 1.984  | 1.851  | 1.844  | 1.463  | 1.668  | 1.140  | 2.141  | 2.182  | 13498 | ATN1     | NM_007881_6_-1  |
| Dsg2     | -3.668 | -1.255 | -4.785 | -3.573 | -4.338 | -1.537 | -4.976 | -4.807 | -4.981 | -4.981 | 13511 | DSG2     | NM_007883_18_+1 |
| Slc26a2  | 2.094  | 2.111  | 4.073  | 4.022  | 3.915  | 3.916  | 4.301  | 4.300  | 5.035  | 5.287  | 13521 | SLC26A2  | NM_007885_18_-1 |
| Dtnb     | 1.680  | 2.601  | 4.138  | 4.518  | 1.709  | 1.504  | 2.608  | 2.780  | -0.051 | 0.598  | 13528 | DTNB     | NM_007886_12_+1 |
| Usp17la  | -1.894 | -3.136 | -0.260 | -0.668 | -1.498 | -2.599 | -2.356 | -3.059 | -4.950 | -3.855 | 13531 | NA       | NM_007887_7_+1  |
| Dvl2     | 3.335  | 3.448  | 3.100  | 3.044  | 3.625  | 3.520  | 3.145  | 3.185  | 4.258  | 4.078  | 13543 | DVL2     | NM_007888_11_+1 |
| Dvl3     | 1.841  | 1.701  | 2.347  | 2.319  | 2.426  | 2.295  | 2.224  | 2.512  | 3.807  | 3.786  | 13544 | DVL3     | NM_007889_16_+1 |
| Dyrk1a   | 0.952  | 0.501  | 2.312  | 1.982  | 2.707  | 2.761  | 1.736  | 2.416  | 2.903  | 3.454  | 13548 | DYRK1A   | NM_007890_16_+1 |
| E2f1     | 1.704  | 1.067  | 2.899  | 2.199  | 3.534  | 2.844  | 2.706  | 2.656  | 2.090  | 2.263  | 13555 | E2F1     | NM_007891_2_-1  |
| E2f5     | 3.966  | 4.068  | 4.210  | 4.434  | 3.134  | 3.422  | 3.463  | 3.560  | 2.535  | 2.465  | 13559 | E2F5     | NM_007892_3_+1  |
| E4f1     | 2.277  | 0.950  | 2.522  | 1.863  | 2.537  | 1.302  | 2.825  | 0.673  | 2.938  | 2.499  | 13560 | E4F1     | NM_007893_17_-1 |
| Ear1     | -4.981 | -4.981 | -4.705 | -2.492 | -4.600 | 0.218  | -2.067 | 2.919  | -2.677 | 4.811  | 13586 | NA       | NM_007894_14_-1 |
| Ear2     | 3.695  | -4.981 | 4.797  | 0.136  | 6.849  | 4.489  | 8.776  | 6.934  | 8.153  | 8.551  | 13587 | NA       | NM_007895_14_+1 |
| Mapre1   | 8.041  | 8.175  | 8.304  | 8.602  | 8.823  | 9.257  | 8.173  | 8.155  | 7.289  | 7.486  | 13589 | MAPRE1   | NM_007896_2_+1  |
| Ebf1     | -0.355 | -4.981 | -4.374 | -0.233 | -1.786 | 1.522  | -0.335 | 2.993  | -2.038 | -1.364 | 13591 | EBF1     | NM_007897_11_+1 |
| Ebp      | 7.039  | 7.010  | 5.821  | 5.948  | 5.767  | 5.821  | 5.784  | 6.085  | 5.740  | 5.733  | 13595 | EBP      | NM_007898_X_-1  |
| Ecm1     | -0.537 | -1.008 | -0.035 | -1.244 | -2.192 | -1.891 | -0.233 | 0.696  | 4.599  | 5.125  | 13601 | ECM1     | NM_007899_3_-1  |
| Ect2     | -3.288 | -2.724 | -3.975 | -2.646 | -1.021 | -3.500 | -2.493 | -4.742 | -4.520 | -4.468 | 13605 | ECT2     | NM_007900_3_-1  |
| S1pr1    | 0.987  | -2.097 | 0.576  | 2.382  | 0.741  | 3.736  | 2.539  | 5.425  | 0.647  | 1.936  | 13609 | S1PR1    | NM_007901_3_-1  |
| Edn2     | -1.987 | -2.097 | -3.964 | -4.235 | -4.981 | -4.981 | -4.981 | -4.981 | -4.981 | -4.981 | 13615 | EDN2     | NM_007902_4_+1  |
| EdnrB    | -4.981 | -4.981 | -2.065 | -4.826 | -4.960 | -4.940 | -4.938 | -4.486 | -0.848 | -1.337 | 13618 | EDNRB    | NM_007904_14_-1 |
| Phc1     | 1.291  | 2.146  | -0.106 | -0.716 | 2.295  | 3.553  | -0.373 | 0.555  | -2.217 | -0.017 | 13619 | PHC1     | NM_007905_6_-1  |
| Eef2     | 8.805  | 8.691  | 9.599  | 9.690  | 9.369  | 9.344  | 9.492  | 9.585  | 9.930  | 10.010 | 13629 | EEF2     | NM_007907_10_+1 |
| Eef2k    | 4.580  | 4.548  | 3.761  | 3.799  | 5.781  | 6.304  | 4.564  | 4.033  | 2.357  | 2.064  | 13631 | EEF2K    | NM_007908_7_+1  |
| Efna2    | -3.563 | -2.895 | 1.107  | 1.365  | 1.603  | 1.323  | 0.070  | -2.208 | -1.301 | -0.638 | 13637 | EFNA2    | NM_007909_10_+1 |
| Efna4    | -2.099 | -4.981 | 0.167  | -0.738 | -0.486 | -0.332 | -0.141 | -4.286 | -4.981 | -4.342 | 13639 | EFNA4    | NM_007910_3_-1  |
| Efnb3    | -4.981 | -1.736 | -3.712 | -2.876 | -2.442 | -2.398 | -4.696 | -3.126 | -4.981 | -2.575 | 13643 | EFNB3    | NM_007911_11_-1 |
| Egfr     | 3.165  | 3.860  | -0.303 | -0.190 | -4.942 | -3.951 | -4.939 | -3.875 | -4.981 | -3.878 | 13649 | EGFR     | NM_007912_11_+1 |
| Egr1     | 5.210  | 4.808  | 8.356  | 8.179  | 10.361 | 10.954 | 9.411  | 9.187  | 6.342  | 9.111  | 13653 | EGR1     | NM_007913_18_+1 |
| Ehf      | -2.647 | -2.997 | 2.567  | 3.759  | 5.447  | 5.158  | 5.857  | 5.312  | -1.460 | 1.089  | 13661 | EHF      | NM_007914_2_-1  |
| Ei24     | 3.191  | 3.333  | 3.160  | 3.228  | 3.503  | 3.185  | 3.067  | 3.686  | 4.300  | 4.158  | 13663 | EI24     | NM_007915_9_-1  |
| Ddx19a   | 2.738  | 2.999  | 2.849  | 3.019  | 3.201  | 2.982  | 3.162  | 3.129  | 3.647  | 3.424  | 13680 | DDX19A   | NM_007916_8_-1  |
| Eif4e    | 7.336  | 7.501  | 7.151  | 7.286  | 7.301  | 7.165  | 7.084  | 6.998  | 6.032  | 6.439  | 13684 | EIF4E    | NM_007917_3_+1  |
| Eif4ebp1 | 4.927  | 5.217  | 5.644  | 5.742  | 5.387  | 5.413  | 6.673  | 6.723  | 7.189  | 7.024  | 13685 | EIF4EBP1 | NM_007918_8_+1  |
| Cela2a   | -1.224 | 0.282  | -4.947 | -4.225 | -4.952 | -4.213 | -2.976 | -2.715 | -4.981 | -2.635 | 13706 | CELA2A   | NM_007919_4_-1  |
| Elf1     | 4.084  | 3.923  | 5.192  | 5.024  | 4.780  | 4.718  | 4.534  | 4.267  | 4.406  | 4.202  | 13709 | ELF1     | NM_007920_14_+1 |
| Elk1     | 1.670  | 2.324  | 2.312  | 2.095  | 3.070  | 2.931  | 2.596  | 2.565  | 3.218  | 3.134  | 13712 | ELK1     | NM_007922_X_-1  |
| Elk4     | 3.451  | 3.313  | 3.797  | 3.635  | 3.856  | 3.732  | 3.535  | 3.577  | 3.948  | 3.555  | 13714 | ELK4     | NM_007923_1_+1  |
| Ell      | 3.461  | 3.649  | 3.699  | 3.465  | 3.539  | 3.519  | 3.724  | 3.590  | 5.559  | 4.881  | 13716 | ELL      | NM_007924_8_+1  |
| Aimp1    | 5.738  | 5.642  | 5.288  | 5.247  | 5.272  | 5.293  | 5.381  | 5.113  | 4.726  | 4.594  | 13722 | AIMP1    | NM_007926_3_-1  |
| Emd      | 4.861  | 4.970  | 5.211  | 4.725  | 4.658  | 4.637  | 4.876  | 4.452  | 3.922  | 3.899  | 13726 | EMD      | NM_007927_X_+1  |
| Mark2    | 0.057  | 0.248  | 2.624  | 2.248  | 2.397  | 1.220  | 1.749  | 1.750  | 2.908  | 3.676  | 13728 | MARK2    | NM_007928_19_-1 |
| Emp2     | -3.189 | -2.255 | -2.672 | -2.308 | -2.805 | -1.453 | -3.933 | -2.019 | -4.492 | -2.711 | 13731 | EMP2     | NM_007929_16_-1 |

|          |        |        |        |        |        |        |        |        |        |        |       |                |                  |
|----------|--------|--------|--------|--------|--------|--------|--------|--------|--------|--------|-------|----------------|------------------|
| Enc1     | 0.691  | 0.393  | 0.797  | 0.241  | 1.590  | 1.158  | 1.672  | 0.562  | 0.015  | 0.029  | 13803 | ENC1           | NM_007930_13_+_1 |
| Endog    | 3.994  | 3.643  | 2.181  | 2.620  | 2.542  | 3.027  | 2.903  | 3.216  | 3.297  | 2.933  | 13804 | ENDOG          | NM_007931_2_+_1  |
| Eng      | 1.092  | 1.732  | 0.140  | 0.603  | -1.815 | -1.475 | 0.515  | 2.015  | 2.580  | 3.429  | 13805 | ENG            | NM_007932_2_+_1  |
| Eno3     | 2.601  | 1.688  | 4.390  | 5.709  | 6.263  | 7.776  | 6.298  | 6.096  | 5.393  | 4.618  | 13808 | ENO3           | NM_007933_11_+_1 |
| Epc1     | 3.371  | 3.530  | 2.802  | 3.211  | 3.819  | 3.719  | 3.489  | 2.867  | 2.309  | 2.836  | 13831 | EPC1           | NM_007935_18_-_1 |
| Epha4    | -3.189 | -4.981 | -4.031 | -3.414 | -3.113 | -2.683 | 0.768  | 0.296  | 1.856  | 2.024  | 13838 | EPHA4          | NM_007936_1_-_1  |
| Ephx2    | -0.588 | 0.172  | -0.907 | 2.081  | 0.904  | 2.564  | -0.177 | 0.838  | -2.941 | -1.495 | 13850 | EPHX2          | NM_007940_14_-_1 |
| Stx2     | 2.792  | 2.396  | 4.952  | 4.760  | 3.024  | 3.504  | 3.797  | 3.760  | 4.831  | 4.802  | 13852 | STX2           | NM_007941_5_-_1  |
| Eps15    | 6.951  | 7.402  | 6.871  | 6.835  | 6.423  | 6.395  | 6.341  | 6.617  | 7.044  | 7.432  | 13858 | EPS15          | NM_007943_4_+_1  |
| Eps15l1  | 2.621  | 2.757  | 3.650  | 3.707  | 4.074  | 3.590  | 4.007  | 3.791  | 3.999  | 4.208  | 13859 | EPS15L1        | NM_007944_8_-_1  |
| Eps8     | -3.669 | 3.817  | 4.947  | 4.751  | 4.089  | 4.698  | 4.327  | 4.569  | 3.505  | 5.712  | 13860 | EPS8           | NM_007945_6_-_1  |
| Ercc1    | 5.412  | 5.557  | 4.392  | 4.469  | 4.228  | 4.393  | 4.222  | 4.595  | 4.161  | 4.251  | 13870 | ERCC1          | NM_007948_7_+_1  |
| Ercc2    | 1.852  | 1.396  | 1.597  | 1.199  | 2.202  | 1.334  | 1.762  | 1.021  | 2.305  | 1.217  | 13871 | ERCC2          | NM_007949_7_+_1  |
| Erh      | 7.765  | 7.668  | 7.967  | 8.078  | 7.864  | 7.819  | 7.688  | 7.697  | 6.261  | 6.074  | 13877 | ERH            | NM_007951_12_-_1 |
| Pdia3    | 9.887  | 9.889  | 10.457 | 10.715 | 8.986  | 9.153  | 9.094  | 9.877  | 9.083  | 9.635  | 14827 | PDIA3          | NM_007952_2_+_1  |
| Esrra    | 2.895  | 2.902  | 4.011  | 3.800  | 4.405  | 4.433  | 4.241  | 3.636  | 4.189  | 4.223  | 26379 | NA             | NM_007953_19_-_1 |
| Ptpnv    | 1.868  | 2.054  | 1.736  | 2.486  | -1.430 | 0.461  | -0.209 | 1.706  | 1.928  | 1.745  | 13924 | NA             | NM_007955_1_-_1  |
| Esr1     | -3.098 | -3.113 | -4.119 | -2.597 | -0.583 | -1.169 | -0.108 | -0.457 | 0.854  | 0.324  | 13982 | ESR1           | NM_007956_10_+_1 |
| Smarcad1 | 4.564  | 4.595  | 4.922  | 4.578  | 4.631  | 4.759  | 4.581  | 4.454  | 4.643  | 4.584  | 13990 | SMARCAD1       | NM_007958_6_+_1  |
| Etv1     | 2.361  | 3.421  | -2.139 | -1.170 | -3.085 | -3.889 | -2.742 | -3.155 | 0.392  | 1.448  | 14009 | ETV1           | NM_007960_12_+_1 |
| Etv6     | 4.314  | 4.289  | 5.481  | 5.073  | 5.521  | 5.014  | 5.245  | 4.944  | 4.934  | 5.588  | 14011 | ETV6           | NM_007961_6_+_1  |
| Mpzl2    | -3.189 | -4.981 | 3.801  | 5.206  | 1.445  | 1.809  | 0.905  | -0.190 | -3.531 | -4.981 | 14012 | MPZL2          | NM_007962_9_+_1  |
| Evi5     | 6.489  | 6.463  | 3.601  | 3.640  | 4.258  | 4.298  | 4.950  | 4.693  | 5.828  | 5.979  | 14020 | EV15           | NM_007964_5_-_1  |
| Evl      | -3.863 | -2.729 | -4.033 | -4.332 | -4.396 | -4.653 | -4.096 | -4.371 | -4.241 | -4.023 | 14026 | EVL            | NM_007965_12_+_1 |
| Ewsr1    | 7.141  | 7.012  | 7.570  | 7.366  | 7.793  | 7.643  | 7.663  | 7.406  | 7.422  | 7.077  | 14030 | NA             | NM_007968_11_-_1 |
| Wfdc18   | -2.280 | -1.197 | -2.592 | -3.940 | -3.617 | -4.864 | -0.429 | 0.172  | 1.097  | 0.692  | 14038 | NA             | NM_007969_11_+_1 |
| Ezh1     | 4.924  | 5.052  | 5.014  | 5.096  | 5.338  | 5.253  | 5.406  | 5.607  | 5.890  | 6.209  | 14055 | EZH1           | NM_007970_11_-_1 |
| Ezh2     | 4.662  | 4.473  | 5.676  | 5.555  | 5.794  | 5.409  | 5.155  | 4.723  | 3.466  | 3.792  | 14056 | EZH2           | NM_007971_6_+_1  |
| F10      | -4.981 | -4.981 | -2.386 | -2.577 | -3.753 | -2.913 | -0.205 | -0.819 | 3.071  | 1.695  | 14058 | F10            | NM_007972_8_+_1  |
| F2rl1    | -1.818 | -3.267 | -4.950 | -4.386 | -4.943 | -2.383 | -4.176 | -2.220 | -4.981 | -4.981 | 14063 | F2RL1          | NM_007974_13_-_1 |
| F2rl3    | -2.686 | -4.981 | -4.025 | -2.376 | -4.278 | -3.558 | -4.211 | -3.554 | -1.502 | -3.853 | 14065 | F2RL3          | NM_007975_8_+_1  |
| F5       | 2.481  | 3.164  | -1.156 | -0.346 | -1.229 | -1.333 | 0.324  | 0.223  | 5.921  | 5.960  | 14067 | F5             | NM_007976_1_+_1  |
| F8       | -1.074 | -3.642 | -2.316 | -4.253 | -1.150 | -1.154 | -2.165 | -1.839 | -4.229 | -4.740 | 14069 | F8             | NM_007977_X_-_1  |
| F8a      | 4.315  | 4.218  | 2.915  | 2.909  | 2.729  | 2.527  | 3.155  | 3.373  | 3.610  | 3.524  | 14070 | F8A1 F8A2 F8A3 | NM_007978_X_+_1  |
| F9       | -2.948 | -4.981 | -0.752 | -0.710 | 1.418  | 0.886  | 0.149  | -0.428 | -4.779 | -2.647 | 14071 | F9             | NM_007979_X_+_1  |
| Acsl1    | 5.303  | 5.645  | 4.128  | 4.387  | 4.810  | 4.857  | 5.234  | 5.082  | 6.357  | 5.978  | 14081 | ACSL1          | NM_007981_8_+_1  |
| Ptk2     | 3.157  | 2.873  | 3.702  | 3.260  | 5.051  | 4.699  | 3.385  | 2.282  | 0.725  | 0.934  | 14083 | PTK2           | NM_007982_15_-_1 |
| Faf1     | 5.223  | 5.343  | 5.290  | 5.533  | 5.467  | 5.421  | 5.319  | 5.406  | 5.433  | 5.590  | 14084 | FAF1           | NM_007983_4_+_1  |
| Fscn1    | 1.103  | -0.224 | 5.618  | 6.307  | 6.217  | 5.651  | 5.144  | 3.886  | -3.022 | -1.906 | 14086 | FSCN1          | NM_007984_5_+_1  |
| Fancc    | 2.629  | 2.549  | 1.897  | 1.714  | 2.315  | 1.843  | 2.672  | 2.144  | 2.520  | 1.908  | 14088 | FANCC          | NM_007985_13_-_1 |
| Fap      | -1.417 | -1.814 | 0.071  | 0.314  | 0.503  | -0.131 | 0.913  | 1.125  | -2.780 | 0.435  | 14089 | FAP            | NM_007986_2_-_1  |
| Fas      | 2.005  | 2.796  | 4.598  | 4.453  | 3.988  | 3.190  | 3.401  | 3.947  | 5.044  | 5.370  | 14102 | FAS            | NM_007987_19_+_1 |
| Fasn     | 4.300  | 4.171  | 5.931  | 5.966  | 5.190  | 5.042  | 4.948  | 5.113  | 3.998  | 4.411  | 14104 | FASN           | NM_007988_11_-_1 |
| Foxh1    | -4.981 | -4.981 | -1.506 | -2.175 | -0.899 | -4.416 | -1.313 | -3.009 | -3.925 | -4.981 | 14106 | FOXH1          | NM_007989_15_-_1 |
| Fau      | 8.913  | 8.774  | 9.177  | 8.933  | 9.297  | 9.078  | 9.519  | 9.248  | 8.693  | 8.213  | 14109 | FAU            | NM_007990_19_+_1 |
| Fbl      | 7.712  | 7.315  | 7.204  | 7.089  | 6.417  | 6.406  | 6.515  | 6.589  | 5.485  | 5.216  | 14113 | FBL            | NM_007991_7_+_1  |
| Fbn1     | -4.981 | 0.592  | -2.389 | -4.898 | -3.626 | -4.161 | -3.151 | -4.542 | -2.724 | -4.981 | 14118 | FBN1           | NM_007993_2_-_1  |
| Fcna     | 6.363  | 4.157  | 4.829  | 5.294  | 6.095  | 5.310  | 5.584  | 6.322  | 3.150  | 2.808  | 14133 | NA             | NM_007995_2_-_1  |
| Fdx1     | 5.343  | 5.479  | 4.666  | 4.627  | 4.887  | 5.084  | 4.035  | 3.952  | 2.782  | 2.909  | 14148 | FDX1           | NM_007996_9_-_1  |
| Fdxr     | 4.646  | 4.463  | 4.293  | 4.449  | 3.712  | 3.677  | 3.703  | 3.694  | 3.457  | 3.269  | 14149 | FDXR           | NM_007997_11_-_1 |
| Fech     | 4.461  | 4.746  | 5.216  | 5.994  | 4.344  | 5.824  | 4.721  | 6.230  | 5.759  | 6.132  | 14151 | FECH           | NM_007998_18_-_1 |
| Fen1     | 4.312  | 4.066  | 4.729  | 4.828  | 4.599  | 4.308  | 4.475  | 4.574  | 3.390  | 3.186  | 14156 | FEN1           | NM_007999_19_-_1 |
| Fer      | -4.981 | -4.981 | -4.245 | -4.481 | -4.800 | -4.990 | -4.892 | -4.854 | -4.981 | -2.594 | 14158 | FER            | NM_008000_17_+_1 |
| Fgd1     | -4.981 | -4.981 | 0.269  | -0.132 | -2.002 | -2.384 | -2.558 | -0.923 | -3.783 | -2.501 | 14163 | FGD1           | NM_008001_X_+_1  |
| Fgf10    | -4.981 | -4.981 | -4.672 | -4.850 | -4.981 | -4.981 | -3.683 | -4.780 | -4.981 | -4.981 | 14165 | FGF10          | NM_008002_13_+_1 |
| Fgf17    | -4.981 | -4.981 | -4.976 | -4.976 | -4.981 | -4.981 | -4.974 | -4.978 | -4.981 | -4.981 | 14171 | FGF17          | NM_008004_14_-_1 |
| Fgf18    | -4.981 | -2.964 | -4.540 | -4.579 | -4.981 | -4.981 | -4.940 | -4.756 | -4.981 | -4.981 | 14172 | FGF18          | NM_008005_11_-_1 |
| Fgf2     | -4.981 | -4.981 | -4.515 | -4.248 | -4.776 | -4.260 | -4.972 | -4.396 | -4.981 | -4.981 | 14173 | FGF2           | NM_008006_3_+_1  |
| Fgf7     | -4.981 | -2.136 | -4.726 | -2.940 | -4.817 | -3.588 | -4.966 | -4.054 | -3.750 | -4.981 | 14178 | FGF7           | NM_008008_2_+_1  |
| Fgfr3    | -4.709 | -4.981 | -4.833 | -4.781 | -2.540 | -4.128 | -3.416 | -4.585 | -4.981 | -4.927 | 14184 | FGFR3          | NM_008010_5_+_1  |
| Akr1b8   | -4.981 | -4.981 | -1.146 | -2.757 | -4.868 | -3.868 | -3.889 | -1.868 | -3.822 | -2.222 | 14187 | AKR1B10        | NM_008012_6_+_1  |
| Fgl2     | 1.764  | 1.504  | 8.476  | 8.275  | 7.915  | 8.256  | 7.357  | 7.396  | 7.469  | 7.203  | 14190 | FGL2           | NM_008013_5_+_1  |
| Ppm1g    | 5.955  | 6.060  | 6.454  | 6.505  | 6.581  | 6.699  | 6.272  | 6.537  | 6.450  | 6.175  | 14208 | PPM1G          | NM_008014_5_-_1  |
| Smc2     | 2.565  | 3.334  | 2.930  | 3.453  | 3.724  | 3.714  | 3.328  | 3.345  | 1.398  | 1.090  | 14211 | SMC2           | NM_008017_4_+_1  |
| Sh3pxd2a | 2.837  | 1.465  | 2.889  | 3.429  | 4.005  | 3.647  | 3.396  | 2.255  | 0.129  | 1.023  | 14218 | SH3PXD2A       | NM_008018_19_-_1 |
| Fkbp1a   | 7.180  | 6.954  | 7.654  | 7.717  | 6.557  | 6.555  | 6.997  | 7.055  | 7.270  | 6.675  | 14225 | FKBP1A         | NM_008019_2_+_1  |
| Fkbp2    | 6.108  | 6.079  | 4.445  | 4.602  | 3.427  | 3.744  | 4.718  | 4.980  | 4.185  | 4.153  | 14227 | FKBP2          | NM_008020_19_-_1 |
| Foxm1    | 2.671  | 5.031  | 2.041  | 2.261  | 3.233  | 1.763  | 2.352  | 1.357  | 1.492  | 1.392  | 14235 | FOXM1          | NM_008021_6_+_1  |
| Foxd4    | -4.981 | -4.981 | -4.821 | -3.772 | -4.946 | -4.092 | -1.594 | -2.782 | -1.067 | -4.342 | 14237 | FOXD4          | NM_008022_19_-_1 |
| Fli1     | 5.381  | 5.517  | 5.194  | 5.161  | 4.972  | 4.871  | 5.318  | 5.748  | 6.455  | 6.255  | 14247 | FLI1           | NM_008026_9_-_1  |
| Flot1    | 6.170  | 6.199  | 6.087  | 6.208  | 6.477  | 6.777  | 6.265  | 5.990  | 6.627  | 6.455  | 14251 | FLOT1          | NM_008027_17_+_1 |
| Flot2    | -4.333 | -3.887 | -2.347 | -2.573 | -0.461 | -0.737 | -0.514 | -2.940 | 0.300  | 1.111  | 14252 | FLOT2          | NM_008028_11_+_1 |
| Flt4     | -2.105 | -4.981 | -1.893 | -0.372 | -3.508 | -2.277 | -3.634 | -4.302 | -2.780 | -2.795 | 14257 | FLT4           | NM_008029_11_+_1 |
| Fmr1     | 4.175  | 3.871  | 4.141  | 4.539  | 4.498  | 4.169  | 4.495  | 4.440  | 5.062  | 5.305  | 14265 | FMR1           | NM_008031_X_+_1  |

|          |        |        |        |        |        |        |        |        |        |        |        |          |                 |
|----------|--------|--------|--------|--------|--------|--------|--------|--------|--------|--------|--------|----------|-----------------|
| Fnta     | 6.399  | 6.673  | 6.464  | 6.604  | 5.789  | 6.056  | 5.674  | 6.196  | 5.418  | 6.202  | 14272  | FNTA     | NM_008033_8_-1  |
| Folr1    | -4.981 | -4.981 | -4.976 | -4.969 | -4.954 | -4.979 | -4.975 | -4.972 | -4.933 | -4.888 | 14275  | FOLR1    | NM_008034_7_-1  |
| Folr2    | 1.452  | -1.956 | -0.948 | -0.989 | -4.684 | -4.894 | -3.746 | -0.738 | -2.851 | -1.228 | 14276  | FOLR2    | NM_008035_7_-1  |
| Fosb     | 6.975  | 6.972  | 5.530  | 5.635  | 7.037  | 7.870  | 6.365  | 6.054  | 3.332  | 4.529  | 14282  | FOSB     | NM_008036_7_-1  |
| Fosl2    | 0.384  | 1.014  | 1.623  | 1.909  | 4.371  | 4.427  | 4.700  | 4.464  | 6.129  | 6.095  | 14284  | FOSL2    | NM_008037_5_+1  |
| Fpr2     | -0.323 | -4.981 | -1.311 | -1.507 | 0.684  | 1.762  | 2.630  | 4.057  | 5.018  | 4.767  | 14289  | FPR2     | NM_008039_17_+1 |
| Frat1    | 0.719  | 0.760  | 0.761  | -0.145 | 1.255  | 1.155  | 1.790  | 1.295  | 2.440  | 1.565  | 14296  | FRAT1    | NM_008043_19_+1 |
| Fxn      | 3.680  | 3.676  | 4.355  | 4.779  | 3.269  | 3.787  | 3.541  | 4.147  | 2.655  | 2.221  | 14297  | FXN      | NM_008044_19_-1 |
| Fst      | -4.981 | -4.981 | -4.952 | -4.300 | -4.980 | -4.980 | -4.981 | -4.981 | -4.981 | -2.877 | 14313  | FST      | NM_008046_13_-1 |
| Fstl1    | -3.843 | -4.981 | -4.987 | -4.710 | -3.632 | -3.413 | -4.209 | -3.015 | -4.981 | -4.981 | 14314  | FSTL1    | NM_008047_16_+1 |
| Igfbp7   | 3.466  | 1.202  | 0.448  | 1.097  | -0.448 | 1.511  | 0.834  | 2.297  | -1.586 | -0.451 | 29817  | IGFBP7   | NM_008048_5_-1  |
| Fut1     | -4.981 | -4.981 | -4.934 | -4.119 | -4.981 | -4.981 | -4.850 | -1.445 | -4.981 | -4.981 | 14343  | FUT1     | NM_008051_7_+1  |
| Dtx1     | 0.410  | -1.217 | 0.897  | 1.110  | 8.518  | 8.115  | 5.440  | 5.376  | -0.053 | 1.343  | 14357  | DTX1     | NM_008052_5_-1  |
| Fxr1     | 4.715  | 4.275  | 4.692  | 4.872  | 4.798  | 4.657  | 4.692  | 4.388  | 4.468  | 4.479  | 14359  | FXR1     | NM_008053_3_+1  |
| Fyn      | 9.376  | 9.362  | 6.633  | 6.428  | 5.920  | 5.757  | 6.131  | 6.316  | 5.174  | 4.750  | 14360  | FYN      | NM_008054_10_+1 |
| Fzd4     | -4.981 | -4.981 | -2.219 | -2.861 | -2.213 | -4.782 | -0.928 | -0.293 | 2.409  | 2.070  | 14366  | FZD4     | NM_008055_7_+1  |
| Fzd6     | -2.379 | -3.580 | -2.970 | -3.432 | -2.955 | -2.932 | -3.915 | -4.293 | -4.981 | -4.981 | 14368  | FZD6     | NM_008056_15_+1 |
| Fzd7     | -3.349 | -1.460 | 2.069  | 2.062  | 0.871  | 1.688  | 2.328  | 2.275  | 3.793  | 3.625  | 14369  | FZD7     | NM_008057_1_+1  |
| Fzd8     | -4.981 | 1.315  | -4.762 | -0.623 | -4.333 | -1.625 | -4.767 | 0.084  | -3.925 | 0.888  | 14370  | FZD8     | NM_008058_18_+1 |
| G0s2     | 1.322  | -2.437 | -2.866 | 1.203  | -3.577 | 2.716  | 4.326  | 3.627  | 4.074  | 1.088  | 14373  | G0S2     | NM_008059_1_-1  |
| Ganab    | 2.429  | 2.588  | 1.228  | 3.203  | 2.050  | 2.552  | 2.665  | 1.937  | 3.438  | 3.236  | 14376  | GANAB    | NM_008060_19_+1 |
| G6pdx    | 5.741  | 5.848  | 5.710  | 6.009  | 5.999  | 5.661  | 7.337  | 7.776  | 9.137  | 9.200  | 14381  | G6PD     | NM_008062_X_-1  |
| Slc37a4  | -1.151 | 0.249  | 1.541  | 0.364  | 0.947  | -0.023 | -0.509 | -0.817 | 0.942  | 2.389  | 14385  | SLC37A4  | NM_008063_9_+1  |
| Gaa      | 5.852  | 5.882  | 4.728  | 4.981  | 5.342  | 5.456  | 4.945  | 4.908  | 5.373  | 5.474  | 14387  | GAA      | NM_008064_11_+1 |
| Gabpa    | 4.588  | 4.974  | 4.916  | 4.984  | 4.741  | 4.801  | 4.719  | 5.011  | 5.334  | 5.688  | 14390  | GABPA    | NM_008065_16_+1 |
| Gabrd    | -1.178 | -4.981 | -2.557 | -4.916 | -3.128 | -4.878 | -2.381 | -4.971 | -1.204 | -4.981 | 14403  | GABRD    | NM_008072_4_-1  |
| Gabrr2   | -1.153 | -1.663 | -3.471 | -2.827 | -3.625 | -1.908 | -4.918 | -2.948 | -3.088 | -3.142 | 14409  | GABRR2   | NM_008076_4_+1  |
| Gad1     | -3.668 | -4.981 | -2.313 | -2.002 | -4.617 | -4.007 | -4.638 | -1.293 | -2.919 | -0.924 | 14415  | GAD1     | NM_008077_2_+1  |
| Gad2     | -4.981 | -4.981 | -4.540 | -4.715 | -4.335 | -4.932 | -4.469 | -4.898 | -3.625 | -4.981 | 14417  | GAD2     | NM_008078_2_+1  |
| Galc     | 2.635  | 2.945  | 4.677  | 4.255  | 0.369  | -0.028 | 2.684  | 2.931  | 3.950  | 4.365  | 14420  | GALC     | NM_008079_12_-1 |
| B4galnt1 | 5.495  | 5.217  | 4.595  | 4.840  | 6.505  | 5.922  | 5.918  | 5.764  | 5.975  | 6.462  | 14421  | B4GALNT1 | NM_008080_10_+1 |
| B4galnt2 | -1.526 | -2.486 | -1.959 | -2.449 | 0.908  | -0.157 | 0.878  | -1.996 | -1.830 | -4.092 | 14422  | B4GALNT2 | NM_008081_11_-1 |
| Gapdh    | 9.264  | 7.932  | 9.437  | 8.761  | 9.571  | 8.499  | 9.346  | 8.492  | 9.470  | 8.059  | 14433  | GAPDH    | NM_008084_6_-1  |
| Gapdhs   | -4.181 | -3.727 | -3.961 | -4.298 | -4.025 | -4.844 | -4.735 | -4.794 | -4.981 | -4.323 | 14447  | GAPDHS   | NM_008085_7_-1  |
| Gas1     | -4.981 | -4.981 | -4.969 | -4.969 | -4.981 | -4.981 | -4.960 | -4.628 | -4.981 | -2.684 | 14451  | GAS1     | NM_008086_13_-1 |
| Gas2     | -0.526 | -1.092 | -0.462 | -1.679 | 0.205  | -1.383 | 0.368  | -0.271 | 1.603  | 0.884  | 14453  | GAS2     | NM_008087_7_+1  |
| Gas7     | -4.494 | -4.119 | -3.061 | -1.236 | -3.514 | -4.889 | -0.886 | 0.480  | -0.506 | -0.505 | 14457  | GAS7     | NM_008088_11_+1 |
| Gata1    | -2.948 | 0.198  | -4.377 | 2.521  | -0.583 | 2.962  | 0.446  | 3.344  | -0.949 | 0.772  | 14460  | GATA1    | NM_008089_X_-1  |
| Gata2    | -4.981 | -4.981 | -4.961 | -0.385 | -1.814 | -0.914 | 3.166  | -2.568 | -3.242 | -1.598 | 14461  | GATA2    | NM_008090_6_+1  |
| Gata3    | -3.843 | -2.895 | -4.634 | -1.392 | -2.032 | 0.628  | -1.704 | -0.607 | -2.425 | -2.601 | 14462  | GATA3    | NM_008091_2_-1  |
| Gba      | 3.409  | 3.324  | 2.763  | 3.012  | 2.130  | 1.148  | 2.030  | 2.175  | 2.935  | 2.971  | 14466  | GBA      | NM_008094_3_+1  |
| Gbas     | 5.177  | 5.126  | 4.714  | 4.802  | 4.549  | 4.445  | 4.533  | 4.558  | 4.822  | 4.807  | 14467  | GBAS     | NM_008095_5_+1  |
| Gcdh     | 3.620  | 3.355  | 2.481  | 3.193  | 2.854  | 3.006  | 1.995  | 2.758  | 2.256  | 2.364  | 270076 | GCDH     | NM_008097_8_-1  |
| Mtpn     | 7.590  | 7.860  | 9.284  | 9.180  | 9.106  | 9.163  | 8.756  | 8.825  | 8.901  | 9.522  | 14489  | MTPN     | NM_008098_6_-1  |
| Gcsam    | -0.785 | -1.114 | 8.385  | 8.244  | -1.852 | 2.771  | 1.414  | 4.573  | -1.643 | -2.529 | 14525  | GCSAM    | NM_008099_16_+1 |
| Gcg      | -3.843 | -4.981 | -2.807 | -3.512 | -2.751 | -3.993 | -3.478 | -4.534 | -4.981 | -4.981 | 14526  | NA       | NM_008100_2_-1  |
| Gcgr     | -4.981 | -4.981 | -1.853 | -1.486 | -2.558 | -4.704 | -4.736 | -4.974 | -4.981 | -4.981 | 14527  | GCGR     | NM_008101_11_+1 |
| Gch1     | 3.647  | 4.477  | 4.913  | 5.708  | 5.594  | 6.585  | 5.656  | 6.130  | 6.133  | 6.890  | 14528  | GCH1     | NM_008102_14_-1 |
| Gcm1     | -4.981 | -3.149 | -4.929 | -4.283 | -4.865 | -3.927 | -3.917 | -4.881 | -4.981 | -4.161 | 14531  | GCM1     | NM_008103_9_+1  |
| Gcm2     | 3.609  | 3.228  | -4.960 | -4.960 | -4.962 | -4.962 | -4.779 | -4.959 | -3.925 | -4.981 | 107889 | GCM2     | NM_008104_13_-1 |
| Gcnt2    | -0.661 | -4.981 | -0.895 | -1.498 | -1.472 | -1.796 | -2.226 | -1.304 | -1.013 | -0.823 | 14538  | GCNT2    | NM_008105_13_+1 |
| Gdf1     | -2.273 | -1.569 | -4.962 | -4.962 | -4.979 | -4.979 | -4.981 | -4.981 | -4.981 | -4.981 | 14559  | GDF1     | NM_008107_8_+1  |
| Gdf3     | -4.981 | -4.981 | -4.742 | -1.803 | -2.291 | -1.257 | 0.647  | 0.732  | 2.027  | 1.766  | 14562  | GDF3     | NM_008108_6_-1  |
| Gdf9     | 0.893  | 1.874  | -0.400 | 0.022  | -2.488 | -2.311 | 0.418  | 0.758  | 1.455  | 1.674  | 14566  | GDF9     | NM_008110_11_+1 |
| Gdi2     | 8.370  | 8.889  | 9.699  | 9.725  | 9.613  | 9.915  | 9.129  | 9.220  | 8.634  | 9.023  | 14569  | GDI2     | NM_008112_13_+1 |
| Arhgdig  | -4.981 | -2.239 | -4.912 | -4.912 | -4.811 | -4.413 | -4.253 | -4.344 | -4.981 | -4.981 | 14570  | ARHGDIG  | NM_008113_17_-1 |
| Gfi1b    | -4.981 | -1.495 | -3.373 | 1.971  | 0.129  | 1.852  | -0.229 | 2.900  | 0.230  | 0.813  | 14582  | GFI1B    | NM_008114_2_-1  |
| Gfra2    | 1.024  | -4.647 | -1.470 | -2.111 | 2.188  | 1.904  | 1.152  | 1.435  | -0.357 | -0.641 | 14586  | GFRA2    | NM_008115_14_+1 |
| Ggt1     | -3.460 | -0.894 | -4.960 | -4.634 | -4.118 | -4.240 | -3.469 | -3.842 | -3.398 | -3.140 | 14598  | GGT1     | NM_008116_10_+1 |
| Gh       | -4.981 | -3.315 | -3.781 | -4.272 | -1.293 | -2.107 | -1.787 | -3.226 | -4.394 | -4.981 | 14599  | CSHL1    | NM_008117_11_-1 |
| Gja4     | -0.516 | 0.801  | -4.402 | -3.866 | -4.683 | -4.949 | -3.924 | -3.884 | -4.981 | -4.981 | 14612  | GJA4     | NM_008120_4_-1  |
| Gjc1     | -4.981 | -4.981 | -4.981 | -4.981 | -4.579 | -4.980 | -4.949 | -4.965 | -4.981 | -4.342 | 14615  | GJC1     | NM_008122_11_-1 |
| Gjb2     | -4.981 | -4.981 | -0.432 | -0.241 | -0.491 | 0.039  | 0.204  | 0.739  | 1.512  | 1.401  | 14619  | GJB2     | NM_008125_14_-1 |
| Gclm     | 4.261  | 4.785  | 4.325  | 5.114  | 3.547  | 4.446  | 3.856  | 4.987  | 3.739  | 4.467  | 14630  | GCLM     | NM_008129_3_+1  |
| Gli3     | -2.842 | -4.981 | -4.986 | -4.046 | -3.024 | -4.834 | -3.350 | -4.848 | -4.981 | -4.981 | 14634  | GLI3     | NM_008130_13_+1 |
| Glul     | 5.637  | 5.660  | 4.228  | 4.922  | 4.923  | 5.089  | 5.192  | 5.159  | 5.574  | 5.419  | 14645  | GLUL     | NM_008131_1_+1  |
| Glrp1    | -4.981 | -4.981 | -4.970 | -4.970 | -2.795 | -4.862 | -4.302 | -4.945 | -2.936 | -4.981 | 14659  | NA       | NM_008132_1_-1  |
| Glud1    | 6.433  | 6.446  | 7.519  | 7.471  | 8.018  | 7.873  | 8.216  | 8.148  | 9.022  | 9.118  | 14661  | GLUD1    | NM_008133_14_+1 |
| Glycam1  | 0.366  | -4.981 | -4.909 | -4.612 | -2.860 | -2.238 | -4.952 | -3.091 | -4.981 | -4.981 | 14663  | NA       | NM_008134_15_-1 |
| Slc6a9   | -1.262 | -0.263 | -2.164 | 0.650  | -3.037 | 0.389  | 0.258  | 0.907  | -0.836 | -0.023 | 14664  | SLC6A9   | NM_008135_4_+1  |
| Gnl1     | 4.484  | 4.427  | 4.852  | 4.739  | 4.396  | 4.342  | 4.119  | 4.171  | 3.851  | 3.594  | 14670  | GNL1     | NM_008136_17_+1 |
| Gna14    | -3.843 | -4.981 | -2.855 | -2.347 | -3.494 | -4.185 | -1.633 | -1.846 | -4.981 | -4.981 | 14675  | GNA14    | NM_008137_19_+1 |
| Gnai2    | 8.880  | 8.840  | 9.305  | 9.448  | 9.609  | 9.590  | 9.510  | 9.571  | 10.331 | 10.251 | 14678  | GNAI2    | NM_008138_9_-1  |
| Gnaq     | 5.288  | 5.733  | 5.267  | 5.314  | 4.800  | 5.252  | 4.480  | 4.666  | 4.012  | 4.680  | 14682  | GNAQ     | NM_008139_19_+1 |

|          |        |        |        |        |        |        |        |        |        |        |           |             |                      |
|----------|--------|--------|--------|--------|--------|--------|--------|--------|--------|--------|-----------|-------------|----------------------|
| Gnat1    | -4.981 | -4.981 | -4.610 | -4.964 | -3.402 | -4.315 | -4.365 | -4.981 | -4.981 | -4.981 | 14685     | GNAT1       | NM_008140_9_-1       |
| Gnat2    | -4.981 | -2.060 | -1.179 | 0.122  | -3.970 | -4.400 | -4.432 | -4.191 | -4.981 | -4.981 | 14686     | GNAT2       | NM_008141_3_+1       |
| Gnb1     | 5.477  | 5.978  | 5.963  | 6.790  | 5.594  | 6.037  | 5.744  | 6.507  | 5.709  | 6.622  | 14688     | GNB1        | NM_008142_4_+1       |
| Rack1    | 8.873  | 9.008  | 9.062  | 9.221  | 8.824  | 8.892  | 9.056  | 9.242  | 8.348  | 8.317  | 14694     | RACK1       | NM_008143_11_+1      |
| Bscl2    | -4.539 | -4.379 | -2.751 | -1.901 | -3.902 | -4.801 | -3.539 | -2.694 | -0.872 | -1.505 | 14705     | BSCL2       | NM_008144_19_+1      |
| Gnrh1    | -2.280 | -2.340 | -1.381 | -4.117 | -2.693 | -4.560 | -2.086 | -4.317 | -1.412 | -1.897 | 14714     | GNRH1       | NM_008145_14_+1      |
| Golga3   | 3.259  | 3.728  | 3.927  | 4.172  | 3.915  | 3.911  | 3.596  | 3.834  | 4.561  | 4.737  | 269682    | GOLGA3      | NM_008146_5_+1       |
| Lilr4b   | -1.434 | -4.981 | 3.044  | 2.324  | 0.090  | -0.846 | 4.471  | 3.507  | 5.225  | 5.449  | 14727     | LILRB4      | NM_008147_10_+1      |
| Gp5      | -0.260 | 1.638  | -1.934 | -0.492 | -1.325 | -2.283 | -1.085 | -1.613 | 0.858  | 0.442  | 14729     | GP5         | NM_008148_16_-1      |
| Gpam     | 0.946  | 0.837  | 1.055  | 1.338  | 1.308  | 1.221  | 1.148  | 1.249  | 2.341  | 2.071  | 14732     | GPAM        | NM_008149_19_-1      |
| Gpc4     | -4.981 | -4.981 | -1.871 | -2.223 | -3.142 | -3.245 | -1.181 | -3.207 | -4.394 | -4.981 | 14735     | GPC4        | NM_008150_X_-1       |
| Gpr65    | 5.921  | 5.795  | 8.129  | 7.816  | 6.876  | 6.258  | 6.688  | 7.007  | 6.267  | 6.900  | 14744     | GPR65       | NM_008152_12_+1      |
| Cmklr1   | -1.665 | 0.499  | -4.306 | -4.442 | -2.787 | -3.449 | -0.505 | 1.546  | 1.549  | 2.254  | 14747     | CMKLR1      | NM_008153_5_-1       |
| Gpr3     | -4.981 | -3.315 | -3.472 | -4.026 | -1.654 | -1.152 | -3.104 | -2.142 | -3.461 | -2.750 | 14748     | GPR3        | NM_008154_4_-1       |
| Gpi1     | 7.348  | 7.469  | 8.196  | 8.329  | 7.823  | 7.885  | 7.812  | 7.955  | 8.700  | 8.320  | 14751     | GPI         | NM_008155_7_-1       |
| Gpld1    | 1.012  | -0.196 | 1.577  | 0.708  | 1.594  | 0.984  | 1.546  | 1.174  | 4.119  | 3.214  | 14756     | GPLD1       | NM_008156_13_+1      |
| Gpr19    | 1.363  | -4.285 | -2.206 | -2.056 | -0.733 | -3.296 | -0.429 | -3.361 | -0.399 | -0.064 | 14760     | GPR19       | NM_008157_6_-1       |
| Gpr33    | -0.671 | -1.620 | 4.979  | 3.539  | -3.663 | -4.919 | -2.640 | -2.232 | -4.981 | -4.981 | 14762     | GPR33       | NM_008159_12_-1      |
| Gpx1     | 11.485 | 11.532 | 11.165 | 11.300 | 11.427 | 11.528 | 11.808 | 11.854 | 12.650 | 12.537 | 14775     | GPX1        | NM_008160_9_+1       |
| Gpx3     | -1.076 | -0.560 | -1.081 | -1.497 | -0.804 | -2.748 | -0.050 | 2.093  | 5.131  | 5.188  | 14778     | GPX3        | NM_008161_11_+1      |
| Gpx4     | 7.816  | 7.632  | 6.432  | 6.485  | 7.568  | 7.682  | 7.780  | 7.487  | 7.885  | 7.547  | 625249    | GPX4        | NM_008162_10_+1      |
| Grb2     | 7.278  | 7.003  | 7.790  | 7.889  | 8.191  | 8.163  | 7.782  | 7.713  | 7.678  | 7.665  | 14784     | GRB2        | NM_008163_11_-1      |
| Rhpn1    | -3.734 | -4.981 | -2.293 | -1.121 | -2.812 | -4.145 | -4.318 | -1.802 | -4.981 | -4.981 | 14787     | RHPN1       | NM_008164_15_+1      |
| Grid1    | -4.981 | -4.981 | -2.863 | -0.642 | -4.979 | -3.855 | -4.981 | -4.981 | -4.981 | -4.981 | 14803     | GRID1       | NM_008166_14_+1      |
| Grik5    | 0.418  | 1.015  | -0.348 | -0.603 | 1.367  | 2.225  | 0.175  | -0.576 | 0.324  | 0.042  | 14809     | GRIK5       | NM_008168_7_-1       |
| Grin1    | -1.322 | -4.811 | -4.626 | -3.853 | -4.981 | -4.981 | -4.978 | -4.981 | -4.981 | -4.981 | 14810     | GRIN1       | NM_008169_2_-1       |
| Grin2d   | -1.740 | -1.465 | -1.463 | -2.705 | -3.394 | -2.847 | -2.695 | -2.854 | -2.084 | -1.311 | 14814     | GRIN2D      | NM_008172_7_-1       |
| Nr3c1    | 6.755  | 6.723  | 6.632  | 6.575  | 6.450  | 6.417  | 6.761  | 6.667  | 6.829  | 7.023  | 14815     | NR3C1       | NM_008173_18_-1      |
| Grm8     | 6.312  | 6.762  | -4.797 | -3.232 | -4.950 | -3.028 | -4.922 | -3.465 | -4.981 | -4.981 | 14823     | GRM8        | NM_008174_6_-1       |
| Grn      | 11.280 | 11.788 | 8.871  | 9.273  | 8.016  | 8.195  | 8.513  | 8.923  | 10.097 | 9.861  | 14824     | GRN         | NM_008175_11_+1      |
| Cxcl1    | -4.981 | -4.981 | -0.722 | 1.212  | -4.259 | -0.129 | -1.078 | 0.594  | -2.871 | -0.979 | 14825     | CXCL2       | NM_008176_5_+1       |
| Grpr     | -4.981 | -4.981 | -2.222 | -2.133 | 1.717  | 1.207  | 1.161  | 0.369  | -4.981 | -4.981 | 14829     | GRPR        | NM_008177_X_-1       |
| Gspt2    | -1.809 | -0.368 | -2.077 | 0.002  | -1.969 | -0.431 | 0.588  | 1.806  | 2.251  | 3.121  | 14853     | GSPT2       | NM_008179_X_+1       |
| Gss      | 3.909  | 3.795  | 3.751  | 3.852  | 3.185  | 3.063  | 4.064  | 4.714  | 5.408  | 5.169  | 14854     | GSS         | NM_008180_2_-1       |
| Gstm2    | -1.805 | -1.137 | -4.879 | -3.384 | -4.999 | -3.949 | -2.524 | -4.410 | -3.436 | -4.981 | 14863     | GSTM1       | NM_008183_3_-1       |
| Gstt1    | -1.677 | -1.255 | 0.067  | 0.743  | -1.284 | 0.038  | -0.997 | 0.716  | -4.394 | -2.593 | 14871     | NA          | NM_008185_10_-1      |
| Gtf2h1   | 4.772  | 4.757  | 5.461  | 5.251  | 4.534  | 4.566  | 4.656  | 4.790  | 5.174  | 5.187  | 14884     | GTF2H1      | NM_008186_7_+1       |
| Cfap20   | 5.498  | 5.504  | 4.591  | 4.457  | 4.490  | 4.470  | 4.268  | 4.608  | 4.372  | 4.207  | 14894     | CFAP20      | NM_008187_8_-1       |
| Thumpd3  | 6.441  | 6.469  | 6.341  | 6.351  | 5.852  | 5.949  | 5.698  | 5.569  | 4.990  | 5.152  | 14911     | THUMPD3     | NM_008188_6_+1       |
| Guca1a   | -1.174 | -1.786 | 2.904  | -2.897 | 1.372  | -3.072 | 3.237  | -3.896 | 3.511  | -2.988 | 14913     | GUCA1A      | NM_008189_17_-1      |
| Guca2b   | -0.491 | -0.498 | -4.963 | -4.963 | -4.967 | -4.807 | -4.968 | -3.987 | -4.981 | -4.981 | 14916     | GUCA2B      | NM_008191_4_-1       |
| Gucy2e   | -4.981 | -4.981 | -4.981 | -4.981 | -4.970 | -4.794 | -4.976 | -4.297 | -4.981 | -2.372 | 14919     | GUCY2D      | NM_008192_11_-1      |
| Guk1     | 4.965  | 4.253  | 4.169  | 4.088  | 3.915  | 3.802  | 3.899  | 3.691  | 2.965  | 3.108  | 14923     | GUK1        | NM_008193_11_-1      |
| Gk       | 1.506  | 1.060  | 1.471  | 1.867  | 2.164  | 1.576  | 3.070  | 2.947  | 4.058  | 4.293  | 14933     | NA          | NM_008194_X_-1       |
| Gzmk     | -4.981 | -4.981 | -4.909 | -4.083 | -4.843 | -1.655 | -4.878 | -3.492 | -4.981 | -4.981 | 14945     | GZMK        | NM_008196_13_-1      |
| H1f0     | 6.364  | 6.071  | 5.960  | 5.923  | 6.538  | 6.236  | 6.784  | 7.217  | 7.241  | 7.378  | 14958     | H1F0        | NM_008197_15_+1      |
| Cfb      | 1.623  | -0.675 | 1.274  | 2.299  | 3.105  | 3.302  | 5.164  | 6.448  | 6.700  | 6.788  | 14962     | CFB         | NM_008198_17_-1      |
| H2-B1    | 3.105  | 2.589  | 1.552  | 1.643  | 2.214  | 1.286  | 1.736  | 0.918  | 1.025  | 0.054  | 14963     | HLA-A       | NM_008199_17_-1      |
| Slc39a7  | 5.621  | 5.674  | 5.300  | 5.314  | 5.055  | 4.868  | 5.018  | 5.462  | 6.020  | 5.684  | 14977     | SLC39A7     | NM_008202_17_-1      |
| H2-M2    | 1.067  | -0.089 | 5.550  | 7.221  | 7.611  | 9.508  | 7.452  | 8.042  | -4.981 | -3.370 | 14990     | NA          | NM_008204_17_-1      |
| H2-Oa    | 8.014  | 7.486  | 8.223  | 8.402  | 9.305  | 9.521  | 8.508  | 7.686  | 1.067  | 0.074  | 15001     | HLA-DOA     | NM_008206_17_+1      |
| H2-T24   | 6.310  | 6.252  | 4.283  | 3.962  | 5.027  | 4.513  | 4.630  | 4.539  | 5.905  | 5.001  | 15042     | NA          | NM_008207_17_-1      |
| H2-T3    | -0.591 | -0.164 | -0.502 | -1.073 | -3.368 | -2.897 | -3.517 | -2.638 | -4.032 | -4.164 | 15043     | NA          | NM_008208_17_-1      |
| Mr1      | 3.525  | 3.677  | 0.824  | 1.509  | 2.072  | 2.303  | 1.306  | 2.307  | 2.468  | 2.763  | 15064     | MR1         | NM_008209_1_-1       |
| H3f3a    | 10.885 | 10.940 | 11.250 | 11.024 | 11.866 | 11.817 | 11.659 | 11.520 | 11.521 | 11.747 | 15078     | H3F3A H3F3B | NM_008210_1_-1       |
| H3f3b    | 12.051 | 12.286 | 10.773 | 10.868 | 11.320 | 11.407 | 11.193 | 11.250 | 10.900 | 11.183 | 15081     | H3F3A H3F3B | NM_008211_11_-1      |
| Hadh     | 5.234  | 5.390  | 3.869  | 4.834  | 3.503  | 4.160  | 4.244  | 4.935  | 5.469  | 5.423  | 15107     | HADH        | NM_008212_3_-1       |
| Hars     | 5.843  | 6.047  | 5.725  | 6.311  | 5.489  | 5.731  | 5.366  | 5.973  | 5.055  | 5.221  | 15115     | HARS        | NM_008214_18_-1      |
| Has2     | -4.981 | -4.981 | -3.672 | -3.065 | -3.231 | -1.259 | -4.891 | -2.299 | -4.981 | -4.981 | 15117     | HAS2        | NM_008216_15_-1      |
| Has3     | -2.784 | -3.267 | -3.570 | -4.543 | -2.880 | -4.977 | -3.139 | -4.606 | -4.190 | -4.227 | 15118     | HAS3        | NM_008217_8_+1       |
| Hba-a1   | 6.585  | 9.959  | 7.547  | 11.164 | 7.709  | 12.094 | 8.037  | 11.700 | 6.632  | 10.046 | 15122     | HBA1 HBA2   | NM_008218_11_+1      |
| Hba-a1   | 6.484  | 6.020  | 7.259  | 7.030  | 7.284  | 8.178  | 7.770  | 7.145  | 6.213  | 5.186  | 15122     | HBA1 HBA2   | NM_008218_dup1_11_+2 |
| Hbb-bt   | 4.667  | 7.954  | 5.751  | 8.840  | 5.787  | 9.782  | 6.006  | 9.341  | 4.412  | 7.437  | 101488143 | HBB         | NM_008220_7_-1       |
| Hccs     | 5.454  | 5.597  | 4.842  | 4.818  | 5.511  | 5.319  | 5.119  | 4.823  | 4.865  | 4.959  | 15159     | HCCS        | NM_008222_X_-1       |
| Serpind1 | -2.126 | -2.997 | -1.704 | -1.187 | -2.715 | -2.918 | -4.671 | -2.705 | -2.614 | -3.205 | 15160     | SERPIND1    | NM_008223_16_+1      |
| Hcfc1    | 5.321  | 5.281  | 5.818  | 5.772  | 6.346  | 6.085  | 5.883  | 5.797  | 6.508  | 6.559  | 15161     | HCFC1       | NM_008224_X_-1       |
| Hcls1    | 6.119  | 6.257  | 7.480  | 7.654  | 7.806  | 7.728  | 7.486  | 7.234  | 7.284  | 7.235  | 15163     | HCLS1       | NM_008225_16_+1      |
| Hcn2     | -4.981 | -4.981 | -2.767 | -3.373 | -3.390 | -4.760 | -4.196 | -4.480 | -2.753 | -3.098 | 15166     | HCN2        | NM_008226_10_+1      |
| Hcn3     | -2.948 | -0.513 | 1.081  | 0.714  | 1.438  | 0.702  | -0.072 | -1.180 | -4.981 | -4.981 | 15168     | HCN3        | NM_008227_3_-1       |
| Hdac1    | 7.310  | 6.675  | 7.344  | 6.755  | 7.413  | 6.656  | 6.893  | 6.417  | 6.580  | 6.067  | 433759    | HDAC1       | NM_008228_4_-1       |
| Hdac2    | 6.249  | 6.408  | 6.511  | 6.775  | 6.441  | 6.534  | 6.156  | 6.339  | 5.681  | 6.132  | 15182     | HDAC2       | NM_008229_10_+1      |
| Hdc      | -4.981 | -4.981 | -0.246 | 0.317  | 2.817  | 2.714  | 4.445  | 2.688  | 2.632  | 0.496  | 15186     | HDC         | NM_008230_2_-1       |
| Hdgf     | 6.302  | 6.220  | 6.411  | 6.526  | 6.706  | 6.600  | 6.790  | 6.838  | 6.921  | 6.456  | 15191     | HDGF        | NM_008231_3_+1       |
| Hdgfrp2  | 4.532  | 4.385  | 4.298  | 4.343  | 4.147  | 4.122  | 4.088  | 4.146  | 3.905  | 3.953  | 15193     | HDGFRP2     | NM_008233_17_+1      |

|          |        |        |        |        |        |        |        |        |        |        |       |          |                 |
|----------|--------|--------|--------|--------|--------|--------|--------|--------|--------|--------|-------|----------|-----------------|
| Hells    | 1.249  | 2.091  | 5.184  | 5.181  | 3.719  | 3.157  | 3.716  | 3.404  | 1.646  | 2.008  | 15201 | HELLS    | NM_008234_19_+1 |
| Hes1     | 0.455  | -1.527 | 5.058  | 4.968  | 5.680  | 5.533  | 6.275  | 6.095  | 5.018  | 5.633  | 15205 | HES1     | NM_008235_16_+1 |
| Hes2     | -4.981 | -4.981 | -3.491 | -4.910 | -3.210 | -3.922 | -3.250 | -4.191 | -4.796 | -3.816 | 15206 | HES2     | NM_008236_4_+1  |
| Foxq1    | -4.981 | -4.981 | -4.735 | -4.969 | -3.333 | -3.378 | -1.865 | -0.755 | 0.977  | 2.566  | 15220 | FOXQ1    | NM_008239_13_+1 |
| Foxj1    | -3.668 | -4.981 | -0.147 | -4.682 | -4.980 | -4.738 | -4.954 | -4.968 | -4.981 | -4.981 | 15223 | FOXJ1    | NM_008240_11_-1 |
| Foxd1    | -4.981 | -4.981 | -4.980 | -4.508 | -4.950 | -4.919 | -3.481 | -4.831 | -4.981 | -3.233 | 15229 | FOXD1    | NM_008242_13_+1 |
| Mst1     | 1.037  | 0.524  | 3.159  | 3.415  | 1.164  | 1.727  | -0.968 | 0.034  | -4.190 | -3.758 | 15235 | MST1     | NM_008243_9_+1  |
| Hgs      | 4.350  | 4.469  | 4.988  | 4.835  | 4.656  | 4.280  | 4.932  | 4.645  | 5.356  | 5.619  | 15239 | HGS      | NM_008244_11_+1 |
| Hhex     | 7.531  | 7.817  | 6.279  | 6.119  | 6.791  | 6.962  | 6.441  | 6.340  | 6.422  | 6.186  | 15242 | HHEX     | NM_008245_19_+1 |
| Mfsd14a  | 6.288  | 6.461  | 7.750  | 7.606  | 5.833  | 5.975  | 6.286  | 6.700  | 6.888  | 7.092  | 15247 | MFS14A   | NM_008246_3_-1  |
| Plpp1    | 0.722  | -0.359 | 5.847  | 5.747  | 0.088  | 0.633  | 0.024  | 1.984  | -3.200 | -0.155 | 19012 | NA       | NM_008247_13_+1 |
| Hint1    | 7.868  | 7.721  | 8.047  | 7.849  | 7.717  | 7.501  | 8.000  | 7.697  | 7.183  | 7.011  | 15254 | HINT1    | NM_008248_11_+1 |
| Tfb2m    | 4.569  | 4.490  | 4.235  | 4.404  | 4.090  | 4.208  | 4.177  | 4.123  | 4.165  | 3.974  | 15278 | TFB2M    | NM_008249_1_-1  |
| Hlx      | 0.673  | 0.742  | 2.689  | 2.773  | 4.688  | 4.327  | 4.194  | 3.527  | 4.078  | 4.121  | 15284 | HLX      | NM_008250_1_-1  |
| Hmgn1    | 8.107  | 8.879  | 7.575  | 7.904  | 7.771  | 8.020  | 6.790  | 7.247  | 2.999  | 4.585  | 15312 | HMG1     | NM_008251_16_-1 |
| Hmgb2    | 8.230  | 7.923  | 8.940  | 8.590  | 9.653  | 9.063  | 9.115  | 8.532  | 8.886  | 8.453  | 97165 | HMG2     | NM_008252_8_+1  |
| Hmgb3    | -1.906 | -0.917 | 1.459  | 2.380  | 1.000  | 1.471  | 0.939  | 2.566  | 1.888  | -0.177 | 15354 | NA       | NM_008253_X_+1  |
| Hmgcl    | 7.161  | 7.035  | 6.613  | 6.632  | 6.436  | 6.463  | 6.607  | 6.581  | 7.041  | 6.816  | 15356 | HMGCL    | NM_008254_4_+1  |
| Hmgcr    | 5.778  | 6.234  | 6.360  | 5.887  | 5.549  | 5.640  | 5.477  | 5.513  | 5.825  | 6.228  | 15357 | HMGCR    | NM_008255_13_-1 |
| Hmgcs2   | 4.192  | 5.503  | -4.246 | -3.894 | -4.902 | -3.920 | -3.401 | -4.592 | -2.177 | -2.572 | 15360 | HMGCS2   | NM_008256_3_+1  |
| Hn1      | 9.303  | 9.337  | 8.030  | 8.334  | 8.489  | 8.335  | 8.379  | 8.507  | 7.989  | 8.087  | 15374 | HN1      | NM_008258_11_-1 |
| Hoxa10   | -4.981 | -4.981 | -4.981 | -4.979 | -4.960 | -4.699 | -4.981 | -4.981 | -4.981 | -4.981 | 15395 | HOXA10   | NM_008263_6_-1  |
| Hoxa4    | -1.186 | -0.750 | -2.383 | -2.965 | -1.906 | -2.681 | -3.343 | -3.399 | -4.981 | -3.855 | 15401 | HOXA4    | NM_008265_6_-1  |
| Hpgd     | 5.033  | 2.060  | 5.094  | 3.250  | 5.645  | 2.704  | 8.509  | 6.425  | 8.587  | 6.679  | 15446 | HPGD     | NM_008278_8_+1  |
| Map4k1   | 6.526  | 6.569  | 7.148  | 7.197  | 6.778  | 6.663  | 6.702  | 6.815  | 6.539  | 6.363  | 26411 | MAP4K1   | NM_008279_7_+1  |
| Lipc     | -3.028 | -1.427 | -4.929 | -3.257 | -4.633 | -2.286 | -2.772 | -0.543 | -2.351 | -2.551 | 15450 | LIPC     | NM_008280_9_-1  |
| Hpn      | -3.806 | -4.981 | -4.721 | -4.677 | -4.399 | -4.588 | -4.612 | -4.882 | -4.387 | -4.473 | 15451 | HPN      | NM_008281_7_-1  |
| Hras     | 4.569  | 4.677  | 4.279  | 4.218  | 3.343  | 3.750  | 3.329  | 3.818  | 3.538  | 3.728  | 15461 | HRAS     | NM_008284_7_-1  |
| Hrh1     | 2.775  | 1.633  | 3.167  | 2.586  | 3.795  | 4.517  | 3.449  | 3.182  | -0.348 | -3.292 | 15465 | HRH1     | NM_008285_6_+1  |
| Hrh2     | -4.981 | -4.849 | -2.280 | -3.039 | -1.873 | -1.724 | -0.322 | -2.767 | -2.475 | -1.584 | 15466 | HRH2     | NM_008286_13_+1 |
| Rida     | 4.028  | 6.463  | 3.003  | 4.735  | 2.546  | 4.132  | 2.174  | 4.420  | 1.937  | 3.222  | 15473 | RIDA     | NM_008287_15_-1 |
| Hsd11b1  | 7.354  | 4.746  | -2.940 | -2.024 | -2.150 | 0.833  | -0.594 | 2.506  | -0.520 | -4.841 | 15483 | HSD11B1  | NM_008288_1_-1  |
| Hsd11b2  | -4.981 | -3.267 | -3.595 | -3.641 | -3.197 | -3.596 | -4.348 | -2.597 | -3.925 | -3.816 | 15484 | HSD11B2  | NM_008289_8_+1  |
| Hsd17b4  | 5.622  | 5.524  | 6.337  | 6.289  | 7.372  | 7.114  | 7.059  | 6.613  | 6.746  | 6.627  | 15488 | HSD17B4  | NM_008292_18_+1 |
| Hsf1     | 4.627  | 4.800  | 4.558  | 4.689  | 4.840  | 4.986  | 4.698  | 4.733  | 4.904  | 4.747  | 15499 | HSF1     | NM_008296_15_+1 |
| Hsf2     | 1.605  | 1.694  | 2.570  | 2.316  | 1.648  | 1.521  | 1.867  | 1.028  | 2.134  | 1.927  | 15500 | HSF2     | NM_008297_10_+1 |
| Dnaja1   | 7.653  | 8.105  | 8.172  | 8.032  | 8.135  | 7.653  | 8.044  | 7.716  | 6.714  | 7.118  | 15502 | DNAJA1   | NM_008298_4_+1  |
| Dnabj3   | -0.294 | 0.974  | -0.281 | -0.223 | -0.816 | -0.479 | -2.242 | -1.573 | -3.491 | -2.271 | 15504 | NA       | NM_008299_1_-1  |
| Hspa4    | 6.563  | 6.465  | 7.341  | 7.369  | 7.021  | 6.983  | 7.087  | 6.941  | 7.099  | 6.942  | 15525 | HSPA4    | NM_008300_11_-1 |
| Hspa2    | -1.036 | -2.359 | 1.919  | 0.983  | 2.364  | 1.978  | 1.333  | 1.962  | 2.802  | 2.224  | 15512 | HSPA2    | NM_008301_12_+1 |
| Hsp90ab1 | 9.384  | 9.480  | 9.938  | 10.028 | 9.821  | 9.426  | 9.640  | 9.497  | 8.568  | 8.695  | 15516 | HSP90AB1 | NM_008302_17_-1 |
| Hspe1    | 7.368  | 6.992  | 7.395  | 6.990  | 7.196  | 6.430  | 7.418  | 6.439  | 5.059  | 4.785  | 15528 | HSP1     | NM_008303_1_+1  |
| Sdc2     | 4.316  | 3.838  | 0.244  | 2.078  | -3.198 | -3.504 | -1.923 | -1.566 | -3.373 | -1.401 | 15529 | SDC2     | NM_008304_15_+1 |
| Hspg2    | -3.349 | -4.981 | -2.645 | -3.620 | -2.217 | -2.125 | -4.921 | -3.964 | -4.981 | -4.981 | 15530 | HSPG2    | NM_008305_4_+1  |
| Ndst1    | 3.914  | 3.207  | 4.252  | 3.802  | 6.209  | 6.187  | 4.643  | 4.078  | 5.168  | 4.848  | 15531 | NDST1    | NM_008306_18_-1 |
| Htr1f    | -4.981 | -4.981 | -4.981 | -4.981 | -3.555 | -4.540 | -4.956 | -4.308 | -4.981 | -4.981 | 15557 | HTR1F    | NM_008310_16_-1 |
| Htr2b    | -4.981 | -3.408 | -3.039 | -2.553 | -2.622 | -3.646 | -4.028 | -4.677 | -3.823 | -4.342 | 15559 | HTR2B    | NM_008311_1_-1  |
| Htr7     | -0.851 | -4.981 | 5.824  | 5.859  | -1.558 | -0.025 | -0.222 | 2.111  | -3.750 | -1.044 | 15566 | HTR7     | NM_008315_19_-1 |
| Hus1     | 0.386  | 1.666  | 2.381  | 2.413  | 1.916  | 1.853  | 2.288  | 2.079  | 1.419  | 1.667  | 15574 | HUS1     | NM_008316_11_-1 |
| Hyal1    | -4.981 | -2.437 | -2.535 | -0.124 | -2.128 | -0.689 | -2.585 | -1.408 | -2.106 | -0.686 | 15586 | HYAL1    | NM_008317_9_+1  |
| Icam5    | -4.981 | -1.972 | -0.936 | -1.319 | -1.002 | -2.480 | -2.603 | -2.676 | -4.981 | -1.703 | 15898 | ICAM5    | NM_008319_9_+1  |
| Irf8     | 11.224 | 11.271 | 10.925 | 10.981 | 4.401  | 5.672  | 7.188  | 9.042  | 9.239  | 9.353  | 15900 | IRF8     | NM_008320_8_+1  |
| Id3      | 5.243  | 5.581  | -0.781 | 1.597  | 0.564  | 1.780  | 4.065  | 5.305  | 3.604  | 4.029  | 15903 | ID3      | NM_008321_4_+1  |
| Idh3g    | 7.845  | 7.740  | 7.566  | 7.569  | 7.467  | 7.463  | 7.565  | 7.705  | 7.439  | 7.307  | 15929 | IDH3G    | NM_008323_X_-1  |
| Ido1     | 2.597  | 2.775  | 1.922  | 0.746  | -2.065 | -0.394 | -4.143 | -1.360 | -1.527 | -4.529 | 15930 | IDO1     | NM_008324_8_-1  |
| Idua     | 4.547  | 3.797  | 4.314  | 3.960  | 4.760  | 4.208  | 4.527  | 3.942  | 4.574  | 4.036  | 15932 | IDUA     | NM_008325_5_+1  |
| Irgm1    | 6.828  | 6.657  | 6.282  | 5.991  | 6.497  | 6.149  | 6.766  | 6.410  | 7.229  | 6.499  | 15944 | NA       | NM_008326_11_-1 |
| Ifi202b  | -4.981 | -0.231 | -4.853 | 1.718  | -4.835 | 0.312  | -3.202 | 4.431  | -3.876 | 6.546  | 26388 | NA       | NM_008327_1_-1  |
| Ifi204   | 2.770  | 3.943  | 3.738  | 3.661  | 2.939  | 4.201  | 5.738  | 5.067  | 8.288  | 6.858  | 15951 | IFI16    | NM_008329_1_-1  |
| Ifi47    | 7.500  | 7.259  | 4.109  | 3.793  | 5.566  | 5.579  | 6.045  | 6.089  | 7.185  | 6.428  | 15953 | NA       | NM_008330_11_+1 |
| Ifit1    | 1.628  | 0.979  | 1.796  | 0.399  | 5.310  | 3.435  | 4.791  | 3.323  | 5.155  | 3.820  | 15957 | IFIT1B   | NM_008331_19_+1 |
| Ifit2    | 3.761  | 2.907  | 4.537  | 3.306  | 5.356  | 4.190  | 5.200  | 3.929  | 6.028  | 4.800  | 15958 | IFIT2    | NM_008332_19_+1 |
| Ifng     | -1.498 | -2.349 | -3.540 | -2.124 | -2.869 | -2.406 | -1.098 | -2.152 | -1.695 | -4.981 | 15978 | IFNG     | NM_008337_10_+1 |
| Ifngr2   | 6.361  | 6.107  | 7.340  | 7.434  | 7.607  | 7.720  | 7.665  | 7.859  | 8.324  | 8.651  | 15980 | IFNGR2   | NM_008338_16_+1 |
| Cd79b    | 7.324  | 7.153  | 4.285  | 4.873  | 6.012  | 6.647  | 6.433  | 7.910  | 4.578  | 4.578  | 15985 | CD79B    | NM_008339_11_-1 |
| Igfals   | -2.739 | -4.981 | -3.808 | -4.213 | -4.350 | -4.755 | -4.972 | -4.416 | -2.809 | -4.981 | 16005 | IGFALS   | NM_008340_17_+1 |
| Igfbp3   | -3.843 | -1.347 | -2.995 | -3.551 | -4.037 | -2.812 | -4.697 | -2.511 | -4.981 | -4.981 | 16009 | IGFBP3   | NM_008343_11_-1 |
| Igfbp6   | -2.573 | -4.981 | -4.314 | -4.966 | -1.796 | -0.034 | -1.111 | -0.865 | 1.010  | 1.199  | 16012 | IGFBP6   | NM_008344_15_+1 |
| Il10ra   | 6.624  | 6.206  | 8.501  | 8.208  | 8.478  | 8.191  | 8.737  | 8.576  | 9.425  | 9.374  | 16154 | IL10RA   | NM_008348_9_-1  |
| Il10rb   | 7.453  | 7.790  | 6.701  | 6.872  | 7.282  | 7.269  | 7.279  | 7.275  | 7.010  | 7.241  | 16155 | IL10RB   | NM_008349_16_+1 |
| Il11     | -4.981 | -4.981 | -4.895 | -4.933 | -4.897 | -4.973 | -4.848 | -4.937 | -4.794 | -4.906 | 16156 | IL11     | NM_008350_7_-1  |
| Il12a    | 3.883  | 4.559  | -3.503 | -0.844 | -2.579 | -0.796 | -1.975 | 0.942  | -2.262 | -1.924 | 16159 | IL12A    | NM_008351_3_+1  |
| Il12rb1  | -0.088 | -0.807 | -3.031 | -1.806 | -3.673 | -4.562 | -3.113 | -1.751 | -1.889 | -3.011 | 16161 | IL12RB1  | NM_008353_8_+1  |
| Il12rb2  | 2.154  | 2.000  | 3.568  | 3.566  | 4.676  | 4.193  | 3.202  | 2.748  | 2.864  | 1.532  | 16162 | IL12RB2  | NM_008354_6_-1  |

|          |        |        |        |        |        |        |        |        |        |        |       |          |                 |
|----------|--------|--------|--------|--------|--------|--------|--------|--------|--------|--------|-------|----------|-----------------|
| IL13     | -4.981 | -4.981 | -4.564 | -4.975 | -4.981 | -4.981 | -2.693 | -4.381 | -4.981 | -4.981 | 16163 | IL13     | NM_008355_11_-1 |
| IL15     | -1.112 | -4.787 | 4.091  | 3.875  | 2.167  | 2.102  | 2.415  | 1.270  | 2.749  | 1.872  | 16168 | IL15     | NM_008357_8_-1  |
| IL15ra   | 1.381  | 1.212  | 3.889  | 4.175  | 2.252  | 2.577  | 1.898  | 2.467  | 1.511  | -0.060 | 16169 | IL15RA   | NM_008358_2_+1  |
| IL17ra   | 6.035  | 6.244  | 5.787  | 5.669  | 6.907  | 6.741  | 7.968  | 8.112  | 9.800  | 9.962  | 16172 | IL17RA   | NM_008359_6_+1  |
| IL18     | 4.049  | 3.699  | 5.423  | 5.317  | 5.242  | 5.148  | 5.534  | 5.381  | 4.566  | 4.741  | 16173 | IL18     | NM_008360_9_+1  |
| IL1b     | 2.562  | 1.243  | 8.998  | 9.239  | 10.344 | 10.597 | 10.620 | 10.678 | 8.015  | 8.405  | 16176 | IL1B     | NM_008361_2_-1  |
| IL1r1    | -1.490 | -4.981 | -1.542 | -1.330 | -0.782 | -2.026 | -0.867 | -0.399 | -2.853 | -1.927 | 16177 | IL1R1    | NM_008362_1_+1  |
| Irak1    | 5.162  | 5.101  | 5.685  | 5.518  | 6.140  | 5.924  | 5.502  | 5.251  | 5.265  | 5.542  | 16179 | IRAK1    | NM_008363_X_-1  |
| IL1rap   | 1.760  | 1.538  | 2.618  | 2.328  | -0.620 | -0.289 | 2.513  | 3.362  | 4.336  | 4.839  | 16180 | IL1RAP   | NM_008364_16_+1 |
| IL18r1   | -4.981 | -1.569 | -3.145 | -2.442 | -1.990 | 0.240  | -0.066 | 0.329  | -3.674 | -4.981 | 16182 | IL18R1   | NM_008365_1_+1  |
| IL2      | -4.981 | -4.981 | -4.284 | -4.278 | -4.903 | -4.444 | -4.974 | -4.461 | -4.981 | -4.981 | 16183 | IL2      | NM_008366_3_-1  |
| IL2ra    | 1.395  | 1.902  | -0.923 | 0.365  | -1.150 | 0.113  | 0.000  | 0.450  | -3.981 | -4.342 | 16184 | IL2RA    | NM_008367_2_+1  |
| IL2rb    | 1.115  | -4.981 | -0.451 | -1.406 | -1.588 | -0.936 | 0.073  | 0.004  | -0.215 | -1.752 | 16185 | IL2RB    | NM_008368_15_-1 |
| IL3ra    | 3.220  | 3.081  | 2.202  | 1.794  | 2.199  | 1.743  | 2.561  | 1.711  | 3.505  | 2.700  | 16188 | IL3RA    | NM_008369_14_+1 |
| IL5ra    | -2.784 | -1.488 | -4.185 | -1.318 | -2.351 | -1.103 | -2.126 | 0.453  | -2.871 | -1.799 | 16192 | IL5RA    | NM_008370_6_-1  |
| IL7      | -4.981 | -3.267 | -1.880 | -1.283 | -0.626 | -0.205 | -2.217 | -1.348 | -2.272 | -2.426 | 16196 | IL7      | NM_008371_3_-1  |
| IL7r     | 7.681  | 8.259  | 3.078  | 3.371  | 3.204  | 4.479  | 2.764  | 3.297  | -0.797 | -0.703 | 16197 | IL7R     | NM_008372_15_-1 |
| IL9r     | 0.180  | -3.509 | -4.237 | -1.463 | -0.927 | -2.360 | -2.491 | -1.825 | -4.981 | -2.324 | 16199 | IL9R     | NM_008374_11_-1 |
| Gimap1   | 6.251  | 5.924  | -0.146 | 1.977  | 0.542  | 3.085  | 2.724  | 4.592  | -0.381 | -0.128 | 16205 | GIMAP1   | NM_008376_6_+1  |
| Lrig1    | -0.567 | -2.997 | -0.151 | 0.196  | 0.673  | 2.107  | -0.901 | 0.007  | -1.716 | -1.448 | 16206 | LRIG1    | NM_008377_6_-1  |
| Impact   | 5.678  | 5.779  | 5.038  | 4.993  | 5.566  | 5.709  | 5.195  | 4.813  | 3.672  | 3.612  | 16210 | IMPACT   | NM_008378_18_+1 |
| Kpnb1    | 5.565  | 5.419  | 5.830  | 5.835  | 5.528  | 5.548  | 5.594  | 5.343  | 4.833  | 4.963  | 16211 | KPNB1    | NM_008379_11_-1 |
| Inhba    | -4.981 | -4.981 | -4.952 | -3.386 | -4.544 | -4.291 | -4.692 | -2.983 | 0.437  | -2.097 | 16323 | INHBA    | NM_008380_13_+1 |
| Inhbb    | -4.981 | -4.981 | -4.975 | -4.870 | -4.851 | -3.453 | -4.965 | -4.953 | -4.981 | -4.981 | 16324 | INHBB    | NM_008381_1_-1  |
| Inhbe    | -3.563 | -1.905 | -4.940 | -1.686 | -4.973 | -2.602 | -4.945 | -2.541 | -4.981 | -4.981 | 16326 | INHBE    | NM_008382_10_-1 |
| Cep250   | 2.603  | 1.476  | 2.259  | 2.468  | 2.524  | 1.460  | 2.031  | 1.694  | 3.217  | 1.115  | 16328 | CEP250   | NM_008383_2_+1  |
| Inpp1    | 3.622  | 3.282  | 4.770  | 4.705  | 3.547  | 3.425  | 3.498  | 3.033  | 3.571  | 3.350  | 16329 | INPP1    | NM_008384_1_-1  |
| Inpp5b   | 6.019  | 6.876  | 5.789  | 5.526  | 6.414  | 6.443  | 5.698  | 5.373  | 5.944  | 5.520  | 16330 | INPP5B   | NM_008385_4_+1  |
| Eif3e    | 7.853  | 7.743  | 7.996  | 7.963  | 7.698  | 7.589  | 7.731  | 7.666  | 7.157  | 7.281  | 16341 | EIF3E    | NM_008388_15_-1 |
| Ipp      | 3.813  | 3.835  | 3.457  | 3.712  | 3.806  | 3.906  | 3.847  | 3.757  | 3.429  | 3.675  | 16351 | IPP      | NM_008389_4_+1  |
| Irf1     | 8.592  | 8.928  | 7.805  | 8.011  | 7.646  | 7.885  | 7.625  | 7.669  | 7.881  | 7.883  | 16362 | IRF1     | NM_008390_11_+1 |
| Irf2     | 5.549  | 5.455  | 6.207  | 5.983  | 6.483  | 6.303  | 6.882  | 6.658  | 6.973  | 6.896  | 16363 | IRF2     | NM_008391_8_+1  |
| Acod1    | -4.981 | -4.981 | -4.668 | -3.692 | -4.078 | -1.546 | 1.323  | -0.312 | -1.355 | -1.223 | 16365 | ACOD1    | NM_008392_14_+1 |
| Irf9     | 4.649  | 5.065  | 4.687  | 4.447  | 4.882  | 4.355  | 4.868  | 4.577  | 5.731  | 5.201  | 16391 | IRF9     | NM_008394_14_+1 |
| Itch     | 5.055  | 4.175  | 6.460  | 6.138  | 6.845  | 6.976  | 6.914  | 6.649  | 7.696  | 7.831  | 16396 | ITCH     | NM_008395_2_+1  |
| Itga2    | -4.981 | -4.981 | -4.955 | -2.845 | -4.977 | -4.922 | -0.821 | -2.534 | -2.549 | -4.316 | 16398 | ITGA2    | NM_008396_13_-1 |
| Itga6    | -2.082 | -3.504 | 2.033  | 0.966  | -0.432 | -0.676 | 1.161  | 1.123  | 2.075  | 1.293  | 16403 | ITGA6    | NM_008397_2_+1  |
| Itga7    | -4.981 | -4.981 | -4.981 | -4.981 | -4.376 | -3.944 | -4.928 | -2.812 | -4.981 | -4.981 | 16404 | ITGA7    | NM_008398_10_+1 |
| Itgae    | -0.957 | 0.131  | 6.107  | 7.436  | -1.790 | 0.457  | 0.006  | 0.640  | -4.981 | -1.403 | 16407 | ITGAE    | NM_008399_11_+1 |
| Itgal    | 3.663  | 2.070  | 3.587  | 2.389  | 2.019  | 1.841  | 3.966  | 4.028  | 5.368  | 5.508  | 16408 | ITGAL    | NM_008400_7_+1  |
| Itgam    | -1.579 | -1.846 | 0.325  | 1.284  | 5.576  | 5.094  | 6.608  | 6.848  | 8.956  | 9.016  | 16409 | ITGAM    | NM_008401_7_+1  |
| Itgav    | 2.254  | 2.701  | 5.218  | 5.044  | 4.737  | 4.745  | 5.288  | 5.345  | 6.214  | 6.334  | 16410 | ITGAV    | NM_008402_2_+1  |
| Itgb1bp1 | 6.052  | 6.283  | 5.677  | 5.986  | 5.628  | 5.805  | 5.536  | 5.742  | 4.890  | 5.133  | 16413 | ITGB1BP1 | NM_008403_12_-1 |
| Itgb2    | 7.978  | 7.955  | 8.816  | 9.196  | 9.487  | 9.738  | 9.247  | 9.607  | 10.588 | 10.616 | 16414 | ITGB2    | NM_008404_10_+1 |
| Itgb2l   | -4.981 | -4.981 | -3.386 | -2.417 | -4.949 | -3.578 | -4.842 | -2.738 | 3.506  | -4.981 | 16415 | NA       | NM_008405_16_-1 |
| Stt3a    | 7.802  | 7.683  | 7.672  | 7.873  | 6.861  | 7.014  | 6.900  | 7.540  | 7.713  | 7.997  | 16430 | STT3A    | NM_008408_9_-1  |
| Itm2a    | 4.585  | 4.572  | 4.252  | 2.917  | -0.154 | 1.019  | 1.889  | 2.175  | 1.293  | 0.820  | 16431 | ITM2A    | NM_008409_X_-1  |
| Itm2b    | 11.597 | 11.341 | 10.885 | 10.460 | 10.634 | 10.513 | 10.805 | 10.836 | 11.404 | 11.364 | 16432 | ITM2B    | NM_008410_14_-1 |
| Ivl      | -4.981 | -2.895 | -4.958 | -2.555 | -4.970 | -3.152 | -4.953 | -2.764 | -4.981 | -4.342 | 16447 | NA       | NM_008412_3_-1  |
| Jak2     | 5.460  | 5.548  | 7.819  | 7.459  | 8.354  | 8.385  | 7.498  | 7.002  | 6.346  | 6.526  | 16452 | JAK2     | NM_008413_19_+1 |
| Jrk      | 2.314  | 2.040  | 1.274  | 1.512  | 1.057  | 1.834  | 1.270  | 1.184  | 0.665  | 1.419  | 16469 | JRK      | NM_008415_15_-1 |
| Junb     | 7.925  | 7.895  | 9.888  | 9.621  | 10.737 | 10.791 | 10.550 | 10.464 | 11.414 | 11.146 | 16477 | JUNB     | NM_008416_8_-1  |
| Kcna2    | 0.192  | -2.349 | 0.425  | 1.937  | 0.505  | -0.388 | 0.650  | 1.022  | -1.137 | -1.373 | 16490 | KCNA2    | NM_008417_3_+1  |
| Kcna3    | 3.226  | 3.547  | 1.503  | 1.571  | 1.895  | 0.626  | 2.196  | 2.870  | 3.358  | 2.804  | 16491 | KCNA3    | NM_008418_3_+1  |
| Kcnb1    | 0.119  | -0.553 | -0.342 | 0.140  | 0.243  | -0.492 | -1.040 | -1.078 | -0.027 | -0.594 | 16500 | KCNB1    | NM_008420_2_-1  |
| Kcnc3    | -2.631 | -4.981 | -1.324 | -2.299 | -0.825 | -2.018 | -1.933 | -2.531 | -4.035 | -2.363 | 16504 | KCNC3    | NM_008422_7_+1  |
| Kcnd1    | -4.981 | -1.471 | 0.805  | 1.154  | 1.270  | 2.042  | 1.720  | 1.917  | 0.141  | 0.185  | 16506 | KCND1    | NM_008423_X_+1  |
| Kcnj2    | -2.483 | -4.981 | 1.987  | 1.701  | -1.188 | -0.682 | 2.296  | 3.417  | 3.931  | 5.273  | 16518 | KCNJ2    | NM_008425_11_+1 |
| Kcnj8    | -1.434 | -4.981 | -2.532 | -2.596 | -4.775 | -3.403 | -4.952 | -1.916 | -2.753 | -4.981 | 16523 | KCNJ8    | NM_008428_6_-1  |
| Kcnj9    | -2.362 | -0.892 | -3.861 | -0.979 | -3.141 | -0.265 | -2.427 | -0.508 | -1.639 | -3.498 | 16524 | KCNJ9    | NM_008429_1_-1  |
| Kcnk1    | -2.739 | -4.981 | -3.370 | -1.529 | -1.652 | 2.236  | -3.282 | -0.027 | -4.981 | -4.981 | 16525 | KCNK1    | NM_008430_8_+1  |
| Kcnn4    | 2.871  | 2.324  | 5.330  | 3.941  | 2.378  | 3.043  | 3.741  | 4.727  | 2.396  | 1.688  | 16534 | KCNN4    | NM_008433_7_+1  |
| Kcnq1    | -4.981 | -4.981 | -3.964 | -4.967 | -4.995 | -4.418 | -4.100 | -4.334 | -4.981 | -4.981 | 16535 | KCNQ1    | NM_008434_7_+1  |
| Napsa    | 9.865  | 10.036 | 9.941  | 9.905  | 10.581 | 10.645 | 10.168 | 9.960  | 10.142 | 9.486  | 16541 | NAPSA    | NM_008437_7_+1  |
| Khk      | 8.455  | 6.146  | 5.915  | 5.736  | 4.208  | 4.216  | 5.127  | 4.923  | 5.452  | 4.738  | 16548 | KHK      | NM_008439_5_+1  |
| Kif1a    | -2.995 | -2.775 | -1.725 | -2.861 | -3.386 | -4.033 | -3.693 | -4.353 | -4.981 | -2.502 | 16560 | KIF1A    | NM_008440_1_-1  |
| Kif1b    | -0.209 | 0.051  | 2.610  | 2.787  | 2.464  | 3.868  | 1.815  | 2.931  | 2.727  | 4.106  | 16561 | KIF1B    | NM_008441_4_-1  |
| Kif2a    | 0.084  | -0.478 | 0.960  | 1.195  | -1.651 | 0.023  | 0.749  | -1.309 | -0.256 | -1.014 | 16563 | KIF2A    | NM_008442_13_-1 |
| Kif3a    | -0.329 | -1.569 | -2.168 | -4.016 | -1.010 | -3.325 | -2.430 | -3.225 | -4.126 | -3.450 | 16568 | KIF3A    | NM_008443_11_+1 |
| Kif3b    | 3.569  | 3.607  | 4.863  | 4.809  | 4.593  | 4.495  | 4.363  | 4.543  | 5.262  | 5.531  | 16569 | KIF3B    | NM_008444_2_+1  |
| Kif3c    | 2.660  | 2.496  | 2.534  | 2.373  | 2.156  | 1.985  | 2.187  | 1.880  | 3.305  | 2.992  | 16570 | KIF3C    | NM_008445_12_+1 |
| Kif4     | -1.083 | -1.062 | 2.949  | 2.902  | 3.292  | 2.231  | 2.711  | 1.950  | 1.949  | 0.924  | 16571 | KIF4A    | NM_008446_X_+1  |
| Kif5a    | -0.580 | -1.106 | 0.195  | -0.835 | -1.107 | -1.346 | -0.938 | -2.805 | -3.899 | -2.015 | 16572 | KIF5A    | NM_008447_10_-1 |
| Kif5b    | 7.210  | 7.367  | 7.509  | 7.432  | 7.611  | 7.587  | 7.302  | 7.273  | 7.330  | 7.542  | 16573 | KIF5B    | NM_008448_18_-1 |

|         |        |        |        |        |        |        |        |        |        |        |       |                |                 |
|---------|--------|--------|--------|--------|--------|--------|--------|--------|--------|--------|-------|----------------|-----------------|
| Kif5c   | -1.295 | -0.190 | -2.085 | -1.958 | -3.028 | -2.410 | -4.774 | -2.286 | -0.227 | -0.257 | 16574 | KIF5C          | NM_008449_2_+1  |
| Klc1    | -4.865 | -4.050 | -1.696 | -4.557 | -3.808 | -4.766 | -1.379 | -1.298 | -3.949 | -4.735 | 16593 | KLC1           | NM_008450_12_+1 |
| Klc2    | 0.423  | 0.202  | 0.658  | 0.668  | 0.947  | 0.852  | 0.461  | 0.047  | 0.031  | 0.304  | 16594 | KLC2           | NM_008451_19_-1 |
| Klf2    | 9.005  | 9.034  | 7.350  | 6.996  | 8.077  | 8.209  | 8.151  | 8.199  | 8.999  | 8.428  | 16598 | KLF2           | NM_008452_8_+1  |
| Klf3    | 4.530  | 4.359  | 6.579  | 6.410  | 6.098  | 6.134  | 6.838  | 6.945  | 7.729  | 7.391  | 16599 | KLF3           | NM_008453_5_+1  |
| Klkb1   | -4.981 | -2.681 | -3.820 | -4.986 | -4.250 | -4.748 | -4.595 | -4.960 | -3.738 | -4.981 | 16621 | KLKB1          | NM_008455_8_-1  |
| Klk1b5  | 2.121  | 2.032  | -4.981 | -4.981 | -4.981 | -4.981 | -4.940 | -4.527 | -4.981 | -4.981 | 16622 | KLK3           | NM_008456_7_+1  |
| Klra10  | -4.981 | 0.593  | -3.991 | -0.516 | -4.958 | -1.461 | -4.948 | -2.563 | -4.981 | -1.959 | 16628 | NA             | NM_008459_6_-1  |
| Klra2   | 0.308  | -4.981 | -1.213 | -1.879 | -0.387 | -2.188 | 4.496  | 4.033  | 7.113  | 5.853  | 16633 | NA             | NM_008462_6_-1  |
| Klra5   | -3.090 | -1.045 | 3.495  | 2.281  | -0.331 | -0.127 | -0.492 | -1.677 | -4.981 | -3.758 | 16636 | NA             | NM_008463_6_-1  |
| Klra6   | -4.981 | -2.869 | -2.848 | -4.971 | -4.901 | -2.787 | -4.951 | -4.617 | -4.981 | -4.981 | 16637 | NA             | NM_008464_6_-1  |
| Kpna1   | 3.983  | 4.196  | 5.362  | 5.223  | 5.189  | 5.198  | 5.076  | 5.134  | 5.607  | 5.850  | 16646 | KPNA1          | NM_008465_16_+1 |
| Kpna3   | 5.362  | 5.593  | 6.002  | 6.144  | 5.788  | 5.701  | 5.396  | 5.336  | 4.852  | 5.333  | 16648 | KPNA3          | NM_008466_14_-1 |
| Kpna4   | 5.086  | 5.227  | 6.663  | 6.620  | 6.716  | 6.490  | 6.754  | 6.367  | 5.884  | 6.527  | 16649 | KPNA4          | NM_008467_3_-1  |
| Kpna6   | 3.624  | 3.672  | 4.067  | 3.856  | 3.993  | 3.701  | 3.939  | 3.776  | 4.661  | 4.555  | 16650 | KPNA6          | NM_008468_4_-1  |
| Krt1    | -4.981 | -4.981 | -4.903 | -3.275 | -4.976 | -4.952 | -4.981 | -4.981 | -4.981 | -4.981 | 16678 | KRT1           | NM_008473_15_-1 |
| Ktn1    | 2.594  | 2.670  | 2.610  | 2.461  | 1.815  | 2.812  | 2.953  | 2.655  | 3.135  | 3.585  | 16709 | NA             | NM_008477_14_+1 |
| L1cam   | -0.023 | 1.053  | 2.220  | 0.788  | 2.551  | 2.207  | 4.305  | 3.988  | 4.911  | 4.265  | 16728 | L1CAM          | NM_008478_X_-1  |
| Lag3    | 4.640  | 3.458  | 2.254  | 1.138  | 1.916  | 1.731  | -0.341 | -0.466 | -3.175 | -4.981 | 16768 | LAG3           | NM_008479_6_-1  |
| Lamb2   | 0.429  | -0.009 | 0.081  | -0.056 | -4.520 | -2.497 | -2.423 | -1.279 | -1.238 | 0.361  | 16779 | LAMB2          | NM_008483_9_+1  |
| Lamb3   | -3.577 | -3.200 | -3.704 | -4.498 | -3.973 | -4.737 | -3.669 | -4.848 | -4.981 | -4.234 | 16780 | LAMB3          | NM_008484_1_+1  |
| Lamc2   | -4.981 | -4.981 | -2.861 | -1.675 | -2.359 | -2.302 | -3.546 | -4.963 | -4.981 | -4.981 | 16782 | LAMC2          | NM_008485_1_-1  |
| Anpep   | -2.273 | -2.437 | 5.829  | 5.759  | 5.860  | 5.451  | 4.320  | 3.914  | -0.488 | 0.024  | 16790 | ANPEP          | NM_008486_7_-1  |
| Arhgef2 | 4.654  | 4.753  | 5.951  | 6.187  | 7.179  | 7.325  | 6.837  | 6.553  | 6.320  | 6.672  | 16800 | ARHGEF2        | NM_008487_3_+1  |
| Arhgef1 | -1.509 | -1.905 | -0.119 | -4.020 | -2.948 | -3.798 | -3.321 | -4.153 | -4.357 | -4.643 | 16801 | ARHGEF1        | NM_008488_7_+1  |
| Lbp     | -2.215 | -4.981 | -3.347 | -2.577 | -2.786 | -2.457 | -2.006 | -1.203 | 3.833  | 2.613  | 16803 | LBP            | NM_008489_2_+1  |
| Lcat    | -0.695 | -2.997 | -3.369 | -3.245 | -3.724 | -2.865 | -2.588 | -3.837 | -4.394 | -2.424 | 16816 | LCAT           | NM_008490_8_-1  |
| Lcn2    | -4.981 | -4.981 | -3.319 | 1.670  | -4.584 | 4.189  | -0.647 | 4.761  | 7.688  | 2.409  | 16819 | LCN2           | NM_008491_2_-1  |
| Ldhb    | 7.693  | 8.073  | 0.156  | 0.557  | 3.397  | 3.115  | 2.034  | 1.757  | 5.738  | 4.511  | 16832 | LDHB           | NM_008492_6_-1  |
| Lfng    | -0.373 | -1.901 | 4.739  | 4.426  | 5.461  | 5.135  | 5.862  | 5.752  | 6.437  | 6.979  | 16848 | LFNG           | NM_008494_5_+1  |
| Lgals1  | 10.466 | 10.424 | 4.642  | 4.260  | 5.138  | 4.955  | 6.647  | 6.883  | 7.316  | 7.276  | 16852 | LGALS1         | NM_008495_15_+1 |
| Lgals7  | -4.981 | -4.981 | -4.472 | -4.331 | -4.723 | -4.681 | -4.774 | -4.712 | -4.981 | -4.981 | 16858 | LGALS7 LGALS7B | NM_008496_7_+1  |
| Lhx1    | -4.981 | -4.981 | -4.961 | -4.587 | -4.862 | -4.862 | -4.937 | -4.700 | -2.605 | -2.594 | 16869 | LHX1           | NM_008498_11_-1 |
| Lhx5    | -4.981 | -4.981 | -4.981 | -4.981 | -4.755 | -4.087 | -4.954 | -4.968 | -4.981 | -4.198 | 16873 | LHX5           | NM_008499_5_+1  |
| Lif     | -4.981 | -4.981 | -2.492 | -2.065 | -1.016 | -2.896 | -2.183 | -2.079 | 0.327  | 0.154  | 16878 | LIF            | NM_008501_11_+1 |
| Llgl1   | -0.375 | -0.033 | -1.573 | -3.205 | -2.759 | -0.960 | -1.095 | -0.967 | 0.052  | -0.966 | 16897 | LLGL1          | NM_008502_11_+1 |
| Rps2    | 9.286  | 8.920  | 9.949  | 9.557  | 9.507  | 9.040  | 9.553  | 9.264  | 8.787  | 8.141  | 16898 | RP52           | NM_008503_17_+1 |
| Gzmm    | -1.681 | -2.201 | -4.922 | -3.506 | -3.684 | -4.951 | -3.013 | -3.061 | -3.305 | -3.359 | 16904 | GZMM           | NM_008504_10_+1 |
| Lmo2    | 4.265  | 3.575  | 2.427  | 2.625  | 3.315  | 3.446  | 3.601  | 3.890  | 4.774  | 4.455  | 16909 | LMO2           | NM_008505_2_+1  |
| Mycl    | 4.176  | 4.693  | 4.905  | 4.925  | 3.268  | 3.738  | 3.253  | 3.233  | -0.189 | 0.622  | 16918 | MYCL           | NM_008506_4_+1  |
| Sh2b3   | 5.842  | 6.168  | 6.440  | 6.280  | 6.687  | 6.812  | 6.731  | 6.922  | 7.533  | 7.514  | 16923 | SH2B3          | NM_008507_5_-1  |
| Lpl     | 3.013  | 1.379  | 1.849  | 2.785  | 2.589  | 5.401  | 3.934  | 5.111  | 8.671  | 5.684  | 16956 | LPL            | NM_008509_8_+1  |
| Xcl1    | 2.050  | -0.403 | -3.162 | -2.786 | -0.293 | 0.761  | -0.732 | -0.302 | -0.583 | -4.227 | 16963 | XC11           | NM_008510_1_-1  |
| Lrmp    | 5.845  | 6.154  | 6.155  | 6.770  | 6.828  | 7.046  | 6.342  | 6.694  | 6.504  | 6.764  | 16970 | LRMP           | NM_008511_6_+1  |
| Lrp1    | 1.206  | 0.649  | 3.185  | 3.376  | 4.294  | 3.623  | 6.959  | 7.654  | 9.427  | 9.626  | 16971 | LRP1           | NM_008512_10_-1 |
| Lrp5    | -1.161 | -2.126 | 1.379  | 1.181  | 1.230  | 0.809  | 1.037  | 0.662  | 2.225  | 2.690  | 16973 | LRP5           | NM_008513_19_-1 |
| Lrp6    | 4.288  | 4.681  | 4.001  | 4.500  | 4.271  | 4.322  | 3.740  | 4.161  | 3.771  | 4.415  | 16974 | LRP6           | NM_008514_6_-1  |
| Lrrfip1 | -4.981 | -1.682 | 0.099  | -0.999 | 0.240  | -1.314 | -0.018 | -2.610 | 0.257  | -0.634 | 16978 | LRRFIP1        | NM_008515_1_+1  |
| Lta4h   | 6.202  | 7.425  | 6.471  | 5.653  | 8.329  | 8.337  | 7.423  | 6.878  | 6.652  | 5.440  | 16993 | LTA4H          | NM_008517_10_+1 |
| Ltb     | 7.119  | 5.004  | 6.255  | 6.807  | 9.656  | 9.877  | 8.578  | 8.087  | 4.019  | 3.382  | 16994 | LTB            | NM_008518_17_+1 |
| Ltb4r1  | -3.090 | -4.981 | -0.611 | -0.023 | 2.023  | 1.931  | 5.858  | 6.160  | 7.607  | 6.909  | 16995 | LTB4R          | NM_008519_14_+1 |
| Ltbp3   | -0.467 | 0.280  | -1.425 | -0.320 | -0.972 | -2.140 | -0.632 | 1.025  | 0.871  | 1.182  | 16998 | LTBP3          | NM_008520_19_+1 |
| Ltc4s   | -0.472 | -4.981 | 0.314  | 0.873  | -1.144 | -0.659 | 0.362  | -1.053 | -1.633 | -2.452 | 17001 | LT4S           | NM_008521_11_-1 |
| Ltf     | -4.981 | -4.981 | -2.246 | 1.040  | -1.739 | 4.065  | -2.629 | 4.698  | 8.249  | -2.555 | 17002 | LTF            | NM_008522_9_+1  |
| Ltk     | -4.981 | -1.972 | -2.790 | -0.152 | -2.235 | -0.522 | -4.308 | 1.212  | -4.981 | -4.981 | 17005 | LTK            | NM_008523_2_-1  |
| Lum     | -4.981 | -4.981 | -4.981 | -4.981 | -4.988 | -3.482 | -4.939 | -4.961 | -4.981 | -4.981 | 17022 | LUM            | NM_008524_10_+1 |
| Alad    | 5.572  | 6.371  | 5.008  | 6.635  | 4.729  | 6.757  | 4.510  | 6.629  | 2.031  | 3.498  | 17025 | ALAD           | NM_008525_4_-1  |
| Klrb1c  | -1.970 | -4.981 | -2.647 | -4.584 | -2.874 | -2.892 | -0.755 | -1.791 | 0.040  | -4.981 | 17059 | KLRB1          | NM_008527_6_-1  |
| Blnk    | 8.933  | 9.033  | 3.375  | 3.373  | 2.394  | 4.173  | 3.225  | 5.751  | -0.299 | 1.175  | 17060 | BLNK           | NM_008528_19_-1 |
| Ly6e    | 4.556  | 1.551  | 5.100  | 2.325  | 2.361  | -3.144 | 3.311  | 0.669  | 4.489  | 2.708  | 17069 | LY6E           | NM_008529_15_+1 |
| Epcam   | 5.171  | 5.399  | 2.535  | 2.612  | 3.580  | 5.665  | 2.439  | 3.144  | -4.981 | -2.598 | 17075 | EPCAM          | NM_008532_17_+1 |
| Cd180   | 5.822  | 6.622  | 4.617  | 5.241  | 4.682  | 5.117  | 3.792  | 4.375  | 4.414  | 4.155  | 17079 | CD180          | NM_008533_13_+1 |
| Ly9     | 6.666  | 6.517  | 5.424  | 5.905  | 6.993  | 7.162  | 5.897  | 5.895  | 5.251  | 5.134  | 17085 | LY9            | NM_008534_1_-1  |
| Lyl1    | 1.261  | 1.157  | 1.377  | 1.629  | 1.853  | 2.378  | 4.058  | 4.026  | 4.501  | 4.533  | 17095 | LYL1           | NM_008535_8_+1  |
| Tm4sf1  | 1.097  | -4.981 | -4.940 | -0.843 | -4.897 | -1.862 | -4.948 | -0.329 | -4.981 | -2.885 | 17112 | TM4SF1         | NM_008536_3_-1  |
| Amacr   | 1.619  | 2.702  | 1.468  | 1.837  | 1.262  | 1.518  | 1.891  | 1.755  | 1.689  | 1.808  | 17117 | AMACR          | NM_008537_15_+1 |
| Marcks  | 6.032  | 6.290  | 8.501  | 8.428  | 8.615  | 8.481  | 8.154  | 7.839  | 7.228  | 7.844  | 17118 | NA             | NM_008538_10_-1 |
| Smad1   | 4.874  | 5.106  | 5.137  | 5.261  | 6.002  | 5.981  | 5.425  | 5.001  | 5.286  | 5.137  | 17125 | SMAD1          | NM_008539_8_-1  |
| Smad4   | 5.503  | 5.627  | 6.509  | 5.972  | 6.930  | 6.023  | 6.625  | 6.316  | 7.012  | 7.092  | 17128 | SMAD4          | NM_008540_18_-1 |
| Smad5   | 4.321  | 4.802  | 4.057  | 4.424  | 4.146  | 4.734  | 4.087  | 4.733  | 4.090  | 4.884  | 17129 | SMAD5          | NM_008541_13_+1 |
| Smad6   | -1.099 | -1.395 | -1.205 | -1.998 | -1.099 | -2.232 | -0.462 | -0.807 | 2.376  | 0.815  | 17130 | SMAD6          | NM_008542_9_-1  |
| Mageb3  | -4.981 | -4.981 | -4.973 | -3.885 | -4.989 | -4.939 | -4.840 | -4.171 | -3.471 | -4.981 | 17147 | MAGEB1         | NM_008545_2_-1  |
| Mak     | -4.981 | -4.314 | -4.975 | -4.878 | -4.912 | -4.974 | -4.962 | -4.969 | -2.227 | -1.404 | 17152 | MAK            | NM_008547_13_-1 |
| Man1a   | 2.681  | 2.731  | 4.079  | 4.433  | 7.578  | 7.680  | 6.642  | 6.376  | 5.206  | 6.053  | 17155 | MAN1A1         | NM_008548_10_-1 |

|          |        |        |        |        |        |        |        |        |        |        |        |          |                  |
|----------|--------|--------|--------|--------|--------|--------|--------|--------|--------|--------|--------|----------|------------------|
| Man2a1   | 3.894  | 4.403  | 5.045  | 4.580  | 4.497  | 4.348  | 4.871  | 4.877  | 5.193  | 5.713  | 17158  | MAN2A1   | NM_008549_17_+_1 |
| Man2b2   | 2.539  | 2.931  | 2.463  | 2.919  | 2.497  | 2.464  | 2.528  | 2.743  | 3.985  | 4.325  | 17160  | MAN2B2   | NM_008550_5_-_1  |
| Mapkapk2 | 7.043  | 6.931  | 6.840  | 6.831  | 7.220  | 6.996  | 7.552  | 7.851  | 9.290  | 9.370  | 17164  | MAPKAPK2 | NM_008551_1_-_1  |
| Mas1     | 0.787  | 2.115  | -4.951 | -4.951 | -4.981 | -4.981 | -4.981 | -4.981 | -4.981 | -4.981 | 17171  | MAS1     | NM_008552_17_-_1 |
| Ascl2    | -4.981 | -4.981 | -4.062 | -3.950 | -4.760 | -4.075 | -2.833 | -0.186 | 0.269  | 1.915  | 17173  | ASCL2    | NM_008554_7_-_1  |
| Masp1    | -4.981 | -4.981 | -4.299 | -3.838 | -4.824 | -4.389 | -4.790 | -3.997 | -4.981 | -4.981 | 17174  | NA       | NM_008555_16_-_1 |
| Max      | 2.728  | 1.851  | 3.143  | 2.400  | 1.981  | 1.147  | 3.019  | 2.939  | 2.216  | 2.878  | 17187  | MAX      | NM_008558_12_-_1 |
| Mcl1     | 8.225  | 8.085  | 9.369  | 9.397  | 9.505  | 9.744  | 9.697  | 9.779  | 10.410 | 10.470 | 17210  | MCL1     | NM_008562_3_+_1  |
| Mcm3     | 3.490  | 3.623  | 5.383  | 5.251  | 6.490  | 5.526  | 5.886  | 5.540  | 4.599  | 3.359  | 17215  | MCM3     | NM_008563_1_-_1  |
| Mcm2     | 4.146  | 3.714  | 5.369  | 5.426  | 6.098  | 5.564  | 5.529  | 5.501  | 3.859  | 3.643  | 17216  | MCM2     | NM_008564_6_-_1  |
| Mcm4     | 3.861  | 4.130  | 5.293  | 5.407  | 6.183  | 5.811  | 5.658  | 5.626  | 5.043  | 4.687  | 17217  | MCM4     | NM_008565_16_-_1 |
| Mcm5     | 3.283  | 2.684  | 5.322  | 5.559  | 6.019  | 5.520  | 5.696  | 5.337  | 4.426  | 3.531  | 17218  | MCM5     | NM_008566_8_+_1  |
| Mcm6     | 5.226  | 5.144  | 6.416  | 6.553  | 6.944  | 6.572  | 6.394  | 6.437  | 4.525  | 3.976  | 17219  | MCM6     | NM_008567_1_-_1  |
| Mcm7     | 4.442  | 4.338  | 5.591  | 5.855  | 6.580  | 6.227  | 5.953  | 6.017  | 4.516  | 3.938  | 17220  | MCM7     | NM_008568_5_-_1  |
| Anapc1   | 4.624  | 4.315  | 5.427  | 5.468  | 5.509  | 5.517  | 5.528  | 5.850  | 6.157  | 6.349  | 17222  | ANAPC1   | NM_008569_2_-_1  |
| Mcpt8    | -4.981 | -4.981 | -3.835 | -2.115 | -4.959 | -1.794 | 5.093  | -1.202 | -4.394 | -4.981 | 17231  | NA       | NM_008572_14_-_1 |
| Mdm4     | -3.512 | -2.489 | -0.353 | -4.449 | 1.182  | -4.800 | -3.327 | -4.436 | 0.952  | -1.855 | 17248  | MDM4     | NM_008575_1_-_1  |
| Abcc1    | 5.232  | 5.208  | 5.400  | 5.408  | 5.660  | 5.309  | 5.725  | 5.609  | 4.863  | 5.051  | 17250  | ABCC1    | NM_008576_16_+_1 |
| Slc3a2   | 7.670  | 7.976  | 7.468  | 7.731  | 7.559  | 8.115  | 6.993  | 7.335  | 6.017  | 6.638  | 17254  | SLC3A2   | NM_008577_19_-_1 |
| Meig1    | 0.211  | 0.384  | -2.774 | -4.184 | -3.498 | -3.155 | -3.113 | -3.586 | -4.190 | -4.981 | 104362 | MEIG1    | NM_008579_2_-_1  |
| Map3k5   | 3.896  | 3.612  | 3.664  | 3.648  | 5.248  | 5.573  | 5.205  | 5.124  | 6.203  | 6.315  | 26408  | MAP3K5   | NM_008580_10_+_1 |
| Men1     | 1.296  | -0.077 | 0.520  | 1.157  | 1.252  | -0.040 | 1.140  | 0.966  | 2.202  | 2.950  | 17283  | MEN1     | NM_008583_19_+_1 |
| Mertk    | -0.349 | -3.315 | 0.823  | 0.587  | 1.113  | 0.100  | 1.170  | 2.468  | 1.198  | 1.391  | 17289  | MERTK    | NM_008587_2_+_1  |
| Mesp2    | -2.739 | -4.981 | -2.086 | -3.711 | -1.335 | -1.541 | -2.805 | -2.186 | -4.981 | -4.316 | 17293  | MESP2    | NM_008589_7_+_1  |
| Mest     | -4.745 | -4.370 | -2.993 | -2.796 | -1.494 | -2.214 | -4.524 | -4.774 | -4.634 | 0.981  | 17294  | MEST     | NM_008590_6_+_1  |
| Met      | -1.327 | -2.583 | 5.136  | 5.251  | -4.069 | -3.030 | 2.072  | 3.557  | 4.973  | 5.480  | 17295  | MET      | NM_008591_6_+_1  |
| Foxc1    | -2.739 | -2.097 | -2.259 | -3.198 | -4.766 | -4.841 | -4.963 | -4.972 | -4.190 | -2.993 | 17300  | FOXC1    | NM_008592_13_+_1 |
| Foxd2    | -1.835 | -1.007 | -1.099 | -0.333 | -0.324 | -1.089 | -0.379 | -0.148 | -0.129 | 0.831  | 17301  | FOXD2    | NM_008593_4_-_1  |
| Mfge8    | 0.666  | 0.860  | 1.365  | 1.092  | 0.563  | 1.046  | 1.761  | 1.864  | 3.180  | 3.281  | 17304  | MFGE8    | NM_008594_7_-_1  |
| Mfng     | 5.302  | 5.360  | 4.621  | 4.547  | 5.460  | 5.173  | 5.328  | 5.103  | 4.898  | 4.518  | 17305  | MFNG     | NM_008595_15_-_1 |
| Mgmt     | 2.883  | 4.398  | 0.864  | 2.325  | 1.663  | 2.497  | 1.117  | 1.470  | 0.205  | 0.424  | 17314  | MGMT     | NM_008598_7_+_1  |
| Cxcl9    | 2.586  | -0.347 | 8.577  | 8.923  | 3.071  | 3.035  | 5.289  | 5.930  | 1.472  | 1.322  | 17329  | NA       | NM_008599_5_-_1  |
| Mip      | -1.449 | -2.681 | -3.939 | -3.085 | -2.788 | -4.117 | -4.123 | -3.101 | -3.461 | -3.131 | 17339  | MIP      | NM_008600_10_+_1 |
| Mitf     | -4.981 | -4.557 | -4.926 | -4.969 | -4.680 | -4.977 | -4.803 | -4.911 | -3.151 | -4.911 | 17342  | MITF     | NM_008601_6_+_1  |
| Pias2    | 3.671  | 3.810  | 3.100  | 2.888  | 3.102  | 2.760  | 3.275  | 3.083  | 3.215  | 3.816  | 17344  | PIAS2    | NM_008602_18_+_1 |
| Mmp12    | -0.753 | 0.487  | 1.365  | 1.040  | 7.446  | 9.012  | 6.960  | 7.033  | -0.779 | -0.006 | 17381  | MMP12    | NM_008605_9_+_1  |
| Mmp11    | 2.964  | 3.139  | -0.512 | -2.135 | -1.757 | -3.916 | -2.216 | -1.108 | -4.981 | -3.042 | 17385  | MMP11    | NM_008606_10_-_1 |
| Mmp13    | -1.762 | -4.981 | -3.306 | -3.409 | -3.491 | -4.086 | -2.342 | -0.585 | -4.981 | -2.572 | 17386  | MMP13    | NM_008607_9_+_1  |
| Mmp14    | 1.058  | 1.814  | -1.387 | -1.275 | 1.671  | 0.514  | 4.720  | 4.167  | 1.062  | 1.601  | 17387  | MMP14    | NM_008608_14_+_1 |
| Mmp15    | -4.981 | -4.981 | -4.912 | -2.843 | -2.263 | -1.303 | -3.298 | -4.939 | -4.981 | -4.981 | 17388  | MMP15    | NM_008609_8_+_1  |
| Mmp2     | -4.981 | -4.981 | -4.532 | -0.988 | -2.062 | -2.173 | -2.010 | -2.242 | -0.121 | -0.876 | 17390  | MMP2     | NM_008610_8_+_1  |
| Mmp8     | -4.981 | -4.981 | -0.719 | -2.284 | -1.459 | 0.526  | 0.853  | 2.881  | 8.589  | 8.212  | 17394  | MMP8     | NM_008611_9_+_1  |
| Mnat1    | 5.371  | 5.603  | 4.376  | 4.814  | 4.808  | 4.735  | 4.522  | 4.572  | 3.744  | 3.897  | 17420  | MNAT1    | NM_008612_12_+_1 |
| Mns1     | 1.245  | 2.414  | 1.632  | 1.655  | 2.928  | 2.334  | 1.911  | 2.172  | -1.481 | -0.732 | 17427  | MNS1     | NM_008613_9_+_1  |
| Me1      | -4.981 | -4.981 | -1.169 | 0.342  | -3.413 | -1.239 | -4.151 | -1.973 | -4.981 | -2.133 | 17436  | ME1      | NM_008615_9_-_1  |
| Zfp239   | -0.215 | -0.819 | -1.325 | -0.267 | -0.564 | -0.378 | 0.201  | -0.761 | -1.971 | -0.493 | 22685  | ZNF239   | NM_008616_6_+_1  |
| Mdh2     | 7.585  | 7.774  | 8.264  | 8.598  | 10.891 | 10.868 | 9.323  | 9.174  | 7.362  | 7.355  | 17448  | MDH2     | NM_008617_5_+_1  |
| Mdh1     | 8.755  | 8.649  | 8.907  | 8.955  | 8.677  | 8.466  | 8.336  | 8.008  | 7.229  | 6.775  | 17449  | MDH1     | NM_008618_11_-_1 |
| Mov10    | -3.332 | -3.175 | -3.067 | 0.335  | -1.271 | 1.082  | 0.456  | 0.534  | 0.441  | 1.028  | 17454  | MOV10    | NM_008619_3_-_1  |
| Gbp4     | 5.261  | 4.686  | 5.709  | 4.976  | 5.798  | 5.382  | 4.299  | 4.509  | 2.297  | 1.938  | 17472  | GBP6     | NM_008620_5_-_1  |
| Mpp1     | 6.526  | 6.771  | 4.827  | 5.446  | 4.170  | 4.942  | 5.600  | 6.284  | 7.977  | 8.128  | 17524  | MPP1     | NM_008621_X_-_1  |
| Mpv17    | 6.196  | 6.385  | 4.736  | 4.718  | 4.424  | 4.638  | 4.890  | 5.149  | 5.198  | 5.215  | 17527  | MPV17    | NM_008622_5_-_1  |
| Mras     | 4.278  | 3.950  | 4.259  | 2.342  | 0.238  | -0.259 | 1.491  | 0.057  | -1.719 | -2.131 | 17532  | MRAS     | NM_008624_9_-_1  |
| Mrc1     | 2.880  | 0.709  | 3.454  | 2.871  | 3.965  | 2.743  | 4.308  | 5.277  | 3.642  | 3.506  | 17533  | MRC1     | NM_008625_2_+_1  |
| Mrc2     | -4.981 | -3.408 | -2.890 | -4.951 | 2.267  | 2.879  | -1.013 | -0.354 | -4.981 | -4.981 | 17534  | MRC2     | NM_008626_11_+_1 |
| Meis3    | 0.482  | 2.068  | -0.515 | 0.423  | 2.985  | 3.622  | 1.015  | 1.737  | -1.632 | 0.139  | 17537  | MEIS3    | NM_008627_7_+_1  |
| Msh2     | 4.250  | 3.952  | 5.045  | 4.668  | 5.227  | 5.003  | 4.843  | 4.470  | 4.145  | 3.820  | 17685  | MSH2     | NM_008628_17_+_1 |
| Mt2      | -2.151 | -0.120 | -0.493 | 2.090  | 0.925  | 1.831  | 0.673  | 3.033  | -0.991 | -0.439 | 17750  | NA       | NM_008630_8_+_1  |
| Map2     | -1.378 | -1.961 | -4.937 | -2.656 | -4.216 | -4.469 | -4.903 | -4.263 | -4.981 | -4.981 | 17756  | MAP2     | NM_008632_1_+_1  |
| Map4     | 2.243  | 1.277  | 4.201  | 3.361  | 3.004  | 2.645  | 2.284  | 2.547  | 3.289  | 3.369  | 17758  | MAP4     | NM_008633_9_+_1  |
| Map1b    | -1.549 | -0.212 | 0.071  | 1.230  | -3.817 | 0.288  | -1.390 | -2.140 | -0.831 | -0.528 | 17755  | MAP1B    | NM_008634_13_-_1 |
| Map7     | 3.468  | -0.876 | 2.029  | -1.768 | 3.196  | -2.429 | 2.066  | -2.268 | 1.255  | -3.386 | 17761  | MAP7     | NM_008635_10_+_1 |
| Mtf1     | 3.948  | 4.224  | 4.544  | 4.375  | 4.618  | 4.600  | 4.393  | 4.230  | 4.547  | 4.543  | 17764  | MTF1     | NM_008636_4_+_1  |
| Nudt1    | 4.271  | 4.133  | 3.253  | 3.309  | 3.446  | 3.466  | 3.622  | 3.400  | 2.827  | 2.599  | 17766  | NUDT1    | NM_008637_5_+_1  |
| Mthfd2   | 4.537  | 4.322  | 6.371  | 6.515  | 6.557  | 6.442  | 6.109  | 5.510  | 4.888  | 4.623  | 17768  | MTHFD2   | NM_008638_6_-_1  |
| Laptm4a  | 8.228  | 8.470  | 7.638  | 7.706  | 7.194  | 7.675  | 8.007  | 8.550  | 8.859  | 8.881  | 17775  | LAPTM4A  | NM_008640_12_+_1 |
| Mast2    | 0.931  | 1.561  | 2.989  | 3.208  | 3.536  | 3.154  | 2.696  | 3.164  | 3.174  | 3.648  | 17776  | MAST2    | NM_008641_4_-_1  |
| Mttp     | -2.483 | -1.635 | -4.917 | -4.761 | -4.156 | -4.863 | -4.533 | -3.815 | -1.412 | -2.210 | 17777  | MITTP    | NM_008642_3_-_1  |
| Mut      | 4.089  | 4.463  | 4.761  | 4.819  | 4.400  | 4.737  | 4.295  | 4.767  | 4.660  | 4.954  | 17850  | MUT      | NM_008650_17_+_1 |
| Mybl1    | -4.981 | -3.861 | -3.782 | -4.700 | -2.782 | -4.013 | -4.887 | -4.827 | -4.799 | -4.874 | 17864  | MYBL1    | NM_008651_1_-_1  |
| Mybl2    | -0.386 | 0.026  | 2.501  | 2.608  | 2.670  | 2.669  | 2.050  | 2.358  | 1.543  | 0.636  | 17865  | MYBL2    | NM_008652_2_+_1  |
| Mybpc3   | 0.264  | 0.256  | 0.139  | 1.432  | -0.182 | 2.003  | -0.916 | -0.595 | -0.597 | 0.100  | 17868  | MYBPC3   | NM_008653_2_+_1  |
| Ppp1r15a | 7.348  | 7.073  | 7.907  | 8.040  | 9.074  | 9.216  | 8.713  | 8.569  | 8.123  | 8.075  | 17872  | PPP1R15A | NM_008654_7_-_1  |
| Gadd45b  | 6.771  | 6.855  | 7.401  | 7.466  | 8.267  | 7.879  | 7.230  | 6.600  | 4.790  | 4.911  | 17873  | GADD45B  | NM_008655_10_+_1 |

|          |        |        |        |        |        |        |        |        |        |        |        |                  |                  |
|----------|--------|--------|--------|--------|--------|--------|--------|--------|--------|--------|--------|------------------|------------------|
| Myo1c    | 4.399  | 4.309  | 4.176  | 4.605  | 3.501  | 3.322  | 4.395  | 4.533  | 6.252  | 6.044  | 17913  | MYO1C            | NM_008659_11+_1  |
| Myo7a    | -3.924 | -2.998 | -3.896 | -4.303 | -4.345 | -4.790 | -3.410 | -4.351 | -1.979 | -2.974 | 17921  | MYO7A            | NM_008663_7_-_1  |
| Myt1l    | -4.981 | -4.981 | -4.978 | -4.734 | -4.904 | -4.952 | -4.982 | -4.939 | -4.981 | -4.981 | 17933  | MYT1L            | NM_008666_12+_1  |
| Nab1     | 6.206  | 6.215  | 6.275  | 6.003  | 6.184  | 6.055  | 6.556  | 6.458  | 7.197  | 7.369  | 17936  | NAB1             | NM_008667_1_-_1  |
| Nab2     | -2.099 | -4.626 | 1.398  | 2.009  | 0.416  | 1.046  | 2.223  | 2.166  | 2.354  | 2.360  | 17937  | NAB2             | NM_008668_10_-_1 |
| Naga     | 7.634  | 7.928  | 9.072  | 9.441  | 6.510  | 7.631  | 7.196  | 7.874  | 7.641  | 7.638  | 17939  | NAGA             | NM_008669_15_-_1 |
| Naip1    | 0.795  | 1.565  | -2.328 | -0.315 | -3.243 | -0.300 | -0.844 | 0.509  | 1.252  | 2.593  | 17940  | NA               | NM_008670_13_-_1 |
| Nap1l2   | 0.537  | 1.520  | -1.798 | -1.699 | -1.849 | -0.622 | -0.906 | -1.095 | -0.453 | -0.641 | 17954  | NAP1L2           | NM_008671_X_-_1  |
| Nap1l4   | 4.354  | 4.112  | 4.735  | 5.018  | 4.669  | 4.870  | 4.729  | 4.619  | 3.730  | 4.108  | 17955  | NAP1L4           | NM_008672_7_-_1  |
| Nat1     | -1.549 | -4.981 | -2.864 | -1.627 | -4.975 | -4.573 | -3.162 | -2.960 | -4.981 | -2.586 | 17960  | NAT2             | NM_008673_8+_1   |
| Nbl1     | 4.054  | 2.589  | 1.925  | 2.463  | 1.256  | 1.626  | -1.966 | -2.391 | -2.549 | -2.993 | 17965  | MINOS1-NBL1 NBL1 | NM_008675_4_-_1  |
| Nbr1     | 2.852  | 4.020  | 3.345  | 4.590  | 3.124  | 4.118  | 3.991  | 4.265  | 4.897  | 5.645  | 17966  | NBR1             | NM_008676_11+_1  |
| Ncf4     | 6.668  | 7.985  | 7.725  | 8.747  | 8.087  | 8.538  | 7.638  | 8.510  | 8.312  | 9.240  | 17972  | NCF4             | NM_008677_15+_1  |
| Ncoa2    | 4.036  | 4.144  | 5.435  | 5.360  | 5.203  | 5.229  | 5.198  | 4.745  | 5.050  | 5.327  | 17978  | NCOA2            | NM_008678_1_-_1  |
| Ncoa3    | 5.593  | 6.051  | 6.592  | 6.695  | 7.013  | 7.331  | 6.825  | 6.622  | 6.919  | 6.923  | 17979  | NCOA3            | NM_008679_2+_1   |
| Enah     | -4.981 | -4.297 | -3.489 | -4.707 | -2.883 | -2.829 | -2.304 | -1.554 | -3.635 | -2.006 | 13800  | ENAH             | NM_008680_1_-_1  |
| Ndrg1    | 2.269  | 2.850  | 4.074  | 4.307  | 3.284  | 4.875  | 4.198  | 4.635  | 7.063  | 6.998  | 17988  | NDRG1            | NM_008681_15_-_1 |
| Nedd1    | 3.599  | 4.260  | 4.214  | 4.066  | 4.409  | 4.006  | 4.440  | 4.121  | 4.335  | 4.337  | 17997  | NEDD1            | NM_008682_10_-_1 |
| Nedd8    | 8.035  | 7.890  | 8.557  | 8.538  | 8.336  | 8.304  | 8.474  | 8.051  | 7.257  | 6.999  | 18002  | NEDD8            | NM_008683_14_-_1 |
| Neo1     | -1.529 | -2.110 | -3.256 | -3.248 | -0.827 | -1.280 | -1.837 | -2.205 | -3.133 | -3.270 | 18007  | NEO1             | NM_008684_9_-_1  |
| Nfe2     | -1.899 | -0.518 | -3.568 | 1.443  | 0.734  | 2.355  | 5.075  | 4.827  | 8.045  | 7.252  | 18022  | NFE2             | NM_008685_15_-_1 |
| Nfe2l1   | 4.069  | 4.361  | 4.569  | 4.667  | 4.861  | 4.722  | 4.789  | 4.950  | 4.906  | 5.263  | 18023  | NFE2L1           | NM_008686_11_-_1 |
| Nfib     | -2.287 | -1.951 | -4.978 | -2.760 | -4.844 | -4.320 | -4.369 | -3.556 | -3.870 | -4.485 | 18028  | NFIB             | NM_008687_4_-_1  |
| Nfic     | 3.935  | 3.823  | 3.633  | 3.751  | 3.333  | 3.246  | 4.389  | 4.378  | 5.662  | 5.316  | 18029  | NFIC             | NM_008688_10_-_1 |
| Nfkb1    | 7.168  | 7.000  | 7.050  | 6.786  | 8.942  | 9.102  | 8.446  | 8.469  | 7.706  | 7.885  | 18033  | NFKB1            | NM_008689_3_-_1  |
| Nfkbie   | 6.511  | 6.494  | 6.685  | 6.895  | 7.448  | 7.505  | 7.304  | 7.295  | 5.810  | 6.817  | 18037  | NFKBIE           | NM_008690_17+_1  |
| Nfyc     | 5.781  | 5.901  | 5.610  | 5.623  | 5.807  | 5.817  | 5.680  | 5.780  | 6.098  | 5.802  | 18046  | NFYC             | NM_008692_4_-_1  |
| Klk1b3   | -2.023 | -1.720 | -4.981 | -4.981 | -4.981 | -4.981 | -4.981 | -4.981 | -4.981 | -4.981 | 18050  | KLK3             | NM_008693_7+_1   |
| Ngp      | -4.981 | -4.981 | -4.578 | 1.937  | -4.703 | 6.133  | -3.821 | 7.421  | 10.260 | -3.855 | 18054  | NA               | NM_008694_9+_1   |
| Nid2     | -0.749 | -1.309 | 2.280  | 2.742  | -2.357 | -1.690 | -0.244 | 0.945  | 1.755  | 2.488  | 18074  | NID2             | NM_008695_14+_1  |
| Map4k4   | 0.208  | 1.654  | -0.730 | 0.132  | 0.644  | -1.541 | 1.220  | -0.986 | 2.549  | 1.524  | 26921  | MAP4K4           | NM_008696_1+_1   |
| Nin      | -0.129 | 1.533  | 0.985  | 0.606  | 1.112  | 0.915  | 2.405  | 1.963  | 4.392  | 3.880  | 18080  | NIN              | NM_008697_12_-_1 |
| Nipsnap1 | 4.088  | 4.521  | 4.012  | 4.740  | 4.297  | 4.529  | 3.683  | 4.011  | 2.378  | 2.777  | 18082  | NIPSNAP1         | NM_008698_11+_1  |
| Nlkx2-3  | -3.563 | -4.981 | -4.957 | -4.534 | -4.989 | -4.786 | -4.164 | -2.545 | -3.750 | -3.853 | 18089  | NKX2-3           | NM_008699_19+_1  |
| Nlk      | 2.686  | 2.939  | 3.331  | 3.181  | 2.753  | 3.056  | 2.870  | 2.550  | 2.719  | 2.750  | 18099  | NLK              | NM_008702_11_-_1 |
| Nme1     | 7.741  | 7.756  | 6.697  | 7.271  | 6.799  | 7.034  | 6.943  | 7.321  | 6.359  | 6.081  | 18102  | NME1             | NM_008704_11_-_1 |
| Nme2     | 6.957  | 6.725  | 6.224  | 6.088  | 6.161  | 6.166  | 6.503  | 6.412  | 6.335  | 5.900  | 18103  | NME2             | NM_008705_11_-_1 |
| Nqo1     | -4.981 | -2.060 | -1.017 | 1.188  | -2.502 | 0.198  | -0.018 | 0.645  | -0.944 | -1.365 | 18104  | NQO1             | NM_008706_8_-_1  |
| Nmt1     | 6.392  | 6.345  | 6.843  | 7.119  | 6.704  | 6.725  | 6.663  | 6.782  | 6.846  | 6.864  | 18107  | NMT1             | NM_008707_11+_1  |
| Nmt2     | 2.838  | 3.593  | 3.618  | 3.596  | 3.137  | 2.859  | 2.322  | 1.916  | -0.229 | 1.800  | 18108  | NMT2             | NM_008708_2+_1   |
| Mycn     | -4.981 | -4.981 | -4.887 | -4.887 | -3.420 | -2.862 | -4.967 | -2.934 | -4.981 | -2.609 | 18109  | MYCN             | NM_008709_12_-_1 |
| Nnt      | -2.505 | 0.533  | -4.175 | -1.099 | -3.205 | -2.128 | -4.312 | -0.939 | -2.989 | 0.242  | 18115  | NA               | NM_008710_13_-_1 |
| Nog      | -4.981 | -0.760 | -4.315 | -4.726 | -4.973 | -4.708 | -4.972 | -4.816 | -4.981 | -4.981 | 18121  | NOG              | NM_008711_11_-_1 |
| Nos1     | -4.981 | -3.315 | -3.828 | -4.693 | -2.438 | -3.990 | -3.859 | -4.548 | -3.189 | -4.119 | 18125  | NOS1             | NM_008712_5+_1   |
| Nos3     | 0.313  | 0.971  | -2.404 | -1.863 | -2.854 | -1.283 | -1.397 | -1.562 | -0.964 | -0.392 | 18127  | NOS3             | NM_008713_5+_1   |
| Notch1   | 5.638  | 5.824  | 1.700  | 2.071  | 0.424  | 0.542  | 2.405  | 2.854  | 5.769  | 5.460  | 18128  | NOTCH1           | NM_008714_2_-_1  |
| Ints6    | 3.496  | 3.960  | 4.609  | 4.569  | 4.551  | 4.487  | 4.029  | 4.007  | 4.613  | 4.707  | 18130  | INTS6            | NM_008715_14_-_1 |
| Notch3   | 2.336  | 3.108  | -0.355 | -0.110 | -2.014 | -2.922 | -3.273 | -4.007 | -4.981 | -4.981 | 18131  | NOTCH3           | NM_008716_17_-_1 |
| Zfp638   | 5.012  | 5.164  | 5.553  | 5.407  | 5.825  | 5.965  | 5.426  | 5.342  | 5.206  | 5.688  | 18139  | ZNF638           | NM_008717_6+_1   |
| Npas1    | -3.668 | -2.997 | -4.256 | -4.531 | -4.327 | -4.669 | -4.042 | -4.227 | -1.302 | -1.167 | 18142  | NPAS1            | NM_008718_7_-_1  |
| Npas2    | 0.443  | 0.245  | -1.794 | -2.531 | -2.897 | -1.521 | -4.781 | -3.899 | -4.981 | -4.981 | 18143  | NPAS2            | NM_008719_1+_1   |
| Npc1     | 7.580  | 7.833  | 4.625  | 4.659  | 5.847  | 6.243  | 5.356  | 4.956  | 5.042  | 5.070  | 18145  | NPC1             | NM_008720_18_-_1 |
| Npdc1    | -0.327 | -4.981 | -3.312 | -2.416 | -4.969 | -3.226 | -2.941 | -2.164 | -4.981 | -4.981 | 18146  | NPDC1            | NM_008721_2+_1   |
| Npm1     | 8.786  | 8.341  | 8.830  | 8.443  | 8.400  | 7.967  | 8.529  | 8.159  | 7.237  | 7.120  | 18148  | NPM1             | NM_008722_11_-_1 |
| Npm3     | 1.916  | 1.896  | 1.920  | 1.472  | 1.848  | 1.396  | 2.272  | 1.369  | 1.484  | 1.320  | 18150  | NPM3             | NM_008723_19_-_1 |
| Nppa     | -4.981 | -2.291 | -3.538 | -3.508 | -4.376 | -4.769 | -4.036 | -4.953 | -4.190 | -4.981 | 230899 | NPPA             | NM_008725_4+_1   |
| Npr1     | -4.981 | -1.347 | -4.036 | -1.317 | -4.878 | -4.028 | -4.766 | -2.555 | -4.981 | -2.733 | 18160  | NPR1             | NM_008727_3_-_1  |
| Ctnnd2   | 4.582  | 4.709  | 2.800  | 2.107  | 6.219  | 6.435  | 4.517  | 3.568  | -0.695 | -2.343 | 18163  | CTNND2           | NM_008729_15+_1  |
| Nptx1    | -4.981 | -4.981 | -3.314 | -3.714 | -4.933 | -4.763 | -4.979 | -4.725 | -4.981 | -4.981 | 18164  | NPTX1            | NM_008730_11_-_1 |
| Slc11a2  | 1.593  | 2.554  | 4.445  | 4.295  | 3.442  | 3.105  | 3.689  | 3.775  | 4.128  | 3.851  | 18174  | SLC11A2          | NM_008732_15_-_1 |
| Nrap     | -4.981 | -4.981 | -4.980 | -4.893 | -4.963 | -4.970 | -4.981 | -4.981 | -4.981 | -4.981 | 18175  | NRAP             | NM_008733_19_-_1 |
| Nrp1     | 6.145  | 6.612  | 4.211  | 5.331  | 3.723  | 4.723  | 5.034  | 6.034  | 7.383  | 7.132  | 18186  | NRP1             | NM_008737_8+_1   |
| Nrtn     | -1.045 | -4.981 | -4.467 | -2.625 | -4.905 | -4.049 | -3.755 | -3.516 | -2.871 | -1.547 | 18188  | NRTN             | NM_008738_17_-_1 |
| Nsd1     | 5.803  | 5.714  | 6.433  | 6.300  | 6.591  | 6.611  | 6.129  | 5.825  | 5.631  | 5.743  | 18193  | NSD1             | NM_008739_13+_1  |
| Nsf      | 6.012  | 5.771  | 5.841  | 5.958  | 5.684  | 5.804  | 6.206  | 6.564  | 7.343  | 7.368  | 18195  | NSF              | NM_008740_11_-_1 |
| Nsg2     | 2.597  | -0.801 | -4.921 | -4.874 | -4.067 | -3.397 | -1.108 | -0.408 | -2.011 | -2.084 | 18197  | HMP19            | NM_008741_11+_1  |
| Nthl1    | 3.288  | 3.156  | 1.604  | 2.002  | 1.842  | 2.594  | 1.658  | 1.873  | 1.129  | 1.008  | 18207  | NTHL1            | NM_008743_17+_1  |
| Ntn1     | -4.981 | -3.408 | -4.326 | -3.461 | -3.665 | -3.717 | -4.715 | -3.482 | -4.981 | -1.755 | 18208  | NTN1             | NM_008744_11_-_1 |
| Ntrk3    | -4.981 | -4.981 | -4.114 | -4.976 | -4.945 | -4.680 | -4.962 | -2.635 | -4.981 | -3.853 | 18213  | NTRK3            | NM_008746_7_-_1  |
| Dusp8    | -3.090 | -2.883 | -0.999 | -0.028 | 0.098  | -0.298 | -1.879 | -1.838 | -4.394 | -2.684 | 18218  | DUSP8            | NM_008748_7_-_1  |
| Nucb1    | -0.978 | -3.612 | -4.093 | -4.491 | -3.184 | -4.702 | -1.262 | -2.468 | 0.041  | -1.498 | 18220  | NUCB1            | NM_008749_7_-_1  |
| Nxn      | 2.449  | 2.352  | 0.847  | 0.926  | 1.317  | 1.149  | 0.474  | 0.084  | 1.971  | 1.312  | 18230  | NXN              | NM_008750_11_-_1 |
| Oaz1     | 10.604 | 10.719 | 9.980  | 9.959  | 9.609  | 9.672  | 9.436  | 9.475  | 8.917  | 8.772  | 18245  | OAZ1             | NM_008753_10+_1  |
| Ocln     | -4.981 | -1.773 | -0.747 | -0.598 | -4.737 | -2.888 | -4.879 | -3.388 | -4.981 | -3.480 | 18260  | OCLN             | NM_008756_13_-_1 |

|           |        |        |        |        |        |        |        |        |        |        |       |           |                  |
|-----------|--------|--------|--------|--------|--------|--------|--------|--------|--------|--------|-------|-----------|------------------|
| Ogn       | -4.981 | -4.981 | -3.847 | -3.278 | -3.318 | -3.988 | -4.988 | -3.493 | -4.394 | -4.316 | 18295 | OGN       | NM_008760_13_+_1 |
| Fxyd5     | 7.768  | 7.413  | 7.563  | 7.136  | 6.467  | 5.968  | 8.376  | 8.549  | 8.951  | 8.575  | 18301 | FXD5      | NM_008761_7_+_1  |
| Tnfrsf11b | -4.981 | -2.160 | -4.965 | -2.471 | -2.708 | -2.545 | -4.962 | -4.868 | -4.981 | -4.981 | 18383 | TNFRSF11B | NM_008764_15_+_1 |
| Orc2      | 4.604  | 4.010  | 4.022  | 4.431  | 4.442  | 4.569  | 4.434  | 4.302  | 3.663  | 3.862  | 18393 | ORC2      | NM_008765_1_+_1  |
| Slc22a18  | -0.942 | -2.060 | 3.824  | 4.191  | -0.213 | 0.539  | 1.060  | 1.595  | 2.002  | 2.091  | 18400 | SLC22A18  | NM_008767_7_+_1  |
| Orm1      | -4.981 | -4.981 | -4.983 | -4.611 | -4.943 | -4.317 | -4.956 | -2.279 | 2.066  | -1.950 | 18405 | NA        | NM_008768_4_+_1  |
| P2rx1     | -3.189 | -1.693 | -3.869 | -1.716 | -3.337 | -2.057 | 1.019  | -1.066 | 3.004  | 2.122  | 18436 | P2RX1     | NM_008771_11_+_1 |
| P2ry1     | -4.537 | -4.439 | -3.335 | -2.578 | -2.805 | -4.292 | -1.500 | -0.957 | 3.861  | 3.995  | 18441 | P2RY1     | NM_008772_3_+_1  |
| P2ry2     | -4.712 | -4.981 | -0.674 | -1.919 | -2.179 | -0.335 | 0.762  | 0.370  | 0.706  | 3.089  | 18442 | P2RY2     | NM_008773_7_+_1  |
| Pabpc1    | 7.866  | 7.778  | 8.971  | 8.920  | 8.682  | 8.672  | 8.867  | 8.740  | 8.576  | 8.551  | 18458 | PABPC1    | NM_008774_15_+_1 |
| Pafah1b2  | 6.109  | 6.066  | 5.642  | 5.804  | 5.697  | 5.845  | 5.906  | 5.927  | 6.157  | 6.365  | 18475 | PAFAH1B2  | NM_008775_9_+_1  |
| Pafah1b3  | 8.487  | 8.796  | 6.920  | 6.730  | 4.566  | 4.674  | 4.414  | 5.152  | 2.655  | 2.686  | 18476 | PAFAH1B3  | NM_008776_7_+_1  |
| Pak3      | -4.981 | -4.981 | -4.980 | -4.843 | -3.936 | -0.649 | -4.972 | -4.823 | -4.981 | -4.981 | 18481 | PAK3      | NM_008778_X_+_1  |
| Pax1      | -4.981 | -4.981 | -4.953 | -4.358 | -4.933 | -3.218 | -4.959 | -4.970 | -4.981 | -4.981 | 18503 | PAX1      | NM_008780_2_+_1  |
| Pax5      | -2.035 | -4.981 | -4.399 | -1.651 | -3.727 | -1.030 | -2.592 | -0.155 | -3.373 | -3.498 | 18507 | PAX5      | NM_008782_4_+_1  |
| Pbx1      | -1.114 | -1.856 | 0.570  | -0.967 | -4.724 | -4.881 | -1.312 | -4.786 | -1.796 | -2.102 | 18514 | PBX1      | NM_008783_1_+_1  |
| Igbp1     | 5.528  | 5.695  | 5.786  | 5.760  | 5.259  | 5.319  | 5.528  | 5.400  | 4.989  | 5.022  | 18518 | IGBP1     | NM_008784_X_+_1  |
| Pcmt1     | 6.348  | 6.372  | 6.279  | 6.170  | 6.018  | 5.802  | 5.865  | 5.799  | 5.451  | 5.378  | 18537 | NA        | NM_008786_10_+_1 |
| Pcnt      | 2.099  | 1.682  | 2.133  | 1.586  | 2.031  | 1.741  | 2.341  | 1.305  | -0.183 | 0.752  | 18541 | NA        | NM_008787_10_+_1 |
| Pcolce    | -0.430 | -4.981 | -2.986 | -2.892 | -4.277 | -3.153 | -3.096 | -0.743 | -4.190 | -3.449 | 18542 | PCOLCE    | NM_008788_5_+_1  |
| Pcp4      | -4.981 | -4.981 | -3.617 | -1.240 | 1.636  | 0.548  | -2.617 | 1.291  | -4.394 | -2.172 | 18546 | PCP4      | NM_008791_16_+_1 |
| Pcsk4     | -2.123 | -2.883 | -2.312 | -2.065 | -1.193 | -1.520 | -2.357 | -1.175 | -1.831 | -4.227 | 18551 | PCSK4     | NM_008793_10_+_1 |
| Pcsk7     | -0.493 | -4.093 | 1.093  | 1.309  | -1.255 | -0.349 | 1.201  | 0.191  | 4.194  | 4.444  | 18554 | PCSK7     | NM_008794_9_+_1  |
| Cdk18     | -3.668 | -1.756 | -0.526 | 0.884  | -2.478 | -3.987 | -1.978 | -2.269 | -3.153 | -2.145 | 18557 | CDK18     | NM_008795_1_+_1  |
| Pctp      | 3.602  | 2.387  | 4.392  | 4.029  | 3.806  | 3.067  | 4.333  | 3.317  | 4.833  | 3.460  | 18559 | PCTP      | NM_008796_11_+_1 |
| Pcx       | -1.531 | 0.474  | -0.475 | -0.193 | -0.304 | -4.091 | -1.435 | -3.207 | -0.745 | -0.073 | 18563 | PC        | NM_008797_19_+_1 |
| Pdcd1     | 0.096  | 0.827  | -2.878 | -0.452 | -2.945 | -1.794 | -3.329 | 0.828  | -1.236 | 1.208  | 18566 | PDCD1     | NM_008798_1_+_1  |
| Pdcd2     | 5.866  | 5.696  | 4.857  | 5.025  | 4.753  | 4.770  | 4.543  | 4.704  | 3.634  | 3.696  | 18567 | PDCD2     | NM_008799_17_+_1 |
| Pde1b     | -0.403 | 0.982  | 6.257  | 6.543  | 2.657  | 2.611  | 1.840  | 3.336  | 3.720  | 3.098  | 18574 | PDE1B     | NM_008800_15_+_1 |
| Pde6d     | 5.456  | 5.678  | 4.998  | 5.122  | 5.456  | 5.692  | 5.149  | 5.064  | 4.363  | 4.619  | 18582 | PDE6D     | NM_008801_1_+_1  |
| Pde7a     | 2.366  | 4.782  | 0.146  | -0.115 | -1.219 | -0.410 | 1.332  | 0.848  | -1.366 | 1.292  | 18583 | PDE7A     | NM_008802_3_+_1  |
| Pde8a     | -0.067 | -1.941 | 3.305  | 3.288  | 1.370  | 1.442  | 1.645  | 1.645  | 2.987  | 3.337  | 18584 | PDE8A     | NM_008803_7_+_1  |
| Pde9a     | -4.981 | -4.981 | -4.613 | -4.501 | -4.980 | -3.969 | -4.536 | -4.498 | -4.981 | -4.981 | 18585 | PDE9A     | NM_008804_17_+_1 |
| Pdgfa     | 3.431  | 4.366  | 1.594  | 2.694  | 0.406  | 0.954  | 0.146  | 0.259  | -0.463 | -1.131 | 18590 | PDGFA     | NM_008808_5_+_1  |
| Pdgfrb    | -4.981 | -4.981 | -4.205 | -3.063 | -3.374 | -0.226 | -0.234 | 0.765  | -0.192 | 2.837  | 18596 | PDGFRB    | NM_008809_18_+_1 |
| Pdha1     | 5.535  | 6.007  | 5.224  | 5.344  | 5.572  | 5.425  | 6.305  | 6.165  | 7.035  | 7.115  | 18597 | PDHA1     | NM_008810_X_+_1  |
| Padi2     | 7.054  | 5.792  | 4.483  | 2.229  | 0.683  | 1.153  | 5.353  | 4.881  | 7.888  | 6.757  | 18600 | PADI2     | NM_008812_4_+_1  |
| Enpp1     | 2.846  | 2.874  | 0.071  | 1.886  | -0.920 | 0.516  | 0.033  | 3.420  | -1.852 | 0.340  | 18605 | ENPP1     | NM_008813_10_+_1 |
| Etv4      | -4.981 | -4.981 | -4.657 | -4.928 | -3.992 | -2.795 | -4.836 | -4.431 | -4.981 | -4.981 | 18612 | ETV4      | NM_008815_11_+_1 |
| Pecam1    | 2.494  | 3.016  | 3.632  | 3.624  | 3.287  | 4.010  | 2.597  | 3.105  | 1.629  | 2.035  | 18613 | PECAM1    | NM_008816_11_+_1 |
| Pemt      | -4.896 | -4.710 | -4.756 | -3.544 | -4.977 | -4.977 | -4.923 | -4.962 | -4.976 | -4.977 | 18618 | PEMT      | NM_008819_11_+_1 |
| Pepd      | 7.187  | 7.492  | 6.346  | 6.995  | 6.532  | 6.286  | 6.303  | 7.055  | 6.789  | 7.097  | 18624 | PEPD      | NM_008820_7_+_1  |
| Pex7      | 5.960  | 5.657  | 5.389  | 5.169  | 5.280  | 5.179  | 5.114  | 4.696  | 5.347  | 4.999  | 18634 | PEX7      | NM_008822_10_+_1 |
| Cfp       | 8.458  | 8.527  | 7.184  | 7.531  | 9.308  | 9.574  | 8.141  | 8.422  | 6.994  | 7.475  | 18636 | CFP       | NM_008823_X_+_1  |
| Pfkfb1    | -0.238 | -0.862 | 2.034  | 0.786  | 0.714  | 0.499  | 0.626  | -0.049 | -1.058 | -1.693 | 18639 | PFKFB1    | NM_008824_X_+_1  |
| Pfkfb2    | 2.900  | 2.573  | 2.129  | 1.975  | 1.783  | 1.973  | 1.677  | 2.040  | 2.511  | 2.989  | 18640 | PFKFB2    | NM_008825_1_+_1  |
| Pfkl      | 4.747  | 5.091  | 5.609  | 6.041  | 5.335  | 5.487  | 5.583  | 5.699  | 5.509  | 5.643  | 18641 | PFKL      | NM_008826_10_+_1 |
| Pgf       | -4.981 | -4.981 | -2.645 | -0.774 | -2.291 | -4.347 | -4.947 | -0.686 | -4.981 | -4.981 | 18654 | PGF       | NM_008827_12_+_1 |
| Pgk1      | 6.605  | 6.498  | 7.850  | 8.030  | 6.424  | 6.539  | 6.876  | 7.099  | 7.406  | 7.360  | 18655 | PGK1      | NM_008828_X_+_1  |
| Abcb4     | 2.465  | 2.583  | -1.512 | 1.495  | 1.344  | 3.015  | 0.420  | 3.012  | 0.008  | 2.233  | 18670 | ABCB4     | NM_008830_5_+_1  |
| Phb       | 6.990  | 6.816  | 6.505  | 6.475  | 6.259  | 6.590  | 6.281  | 6.583  | 5.781  | 5.480  | 18673 | PHB       | NM_008831_11_+_1 |
| Phka1     | 1.437  | 2.345  | 2.818  | 2.715  | 1.773  | 2.531  | 2.457  | 1.633  | 2.822  | 2.779  | 18679 | PHKA1     | NM_008832_X_+_1  |
| Pick1     | -1.616 | -4.350 | -1.968 | -0.540 | -1.230 | -0.849 | -2.597 | -2.024 | -0.767 | -4.945 | 18693 | PICK1     | NM_008837_15_+_1 |
| Pigf      | 3.645  | 3.241  | 5.042  | 4.436  | 4.132  | 3.318  | 4.043  | 3.388  | 3.492  | 3.558  | 18701 | PIGF      | NM_008838_17_+_1 |
| Pik3ca    | 4.590  | 4.811  | 4.666  | 4.956  | 4.742  | 4.668  | 4.823  | 5.167  | 5.697  | 6.194  | 18706 | PIK3CA    | NM_008839_3_+_1  |
| Pik3cd    | 3.580  | 2.339  | 4.099  | 2.040  | 4.438  | 3.596  | 4.031  | 3.816  | 4.781  | 4.126  | 18707 | PIK3CD    | NM_008840_4_+_1  |
| Pik3r2    | 3.509  | 3.138  | 4.039  | 4.317  | 4.189  | 4.070  | 4.429  | 4.494  | 5.426  | 5.125  | 18709 | PIK3R2    | NM_008841_8_+_1  |
| Pim1      | 3.645  | 3.604  | 5.320  | 5.584  | 5.973  | 6.162  | 5.631  | 5.386  | 5.521  | 5.649  | 18712 | PIM1      | NM_008842_17_+_1 |
| Pip5k1c   | 3.479  | 3.690  | 2.981  | 3.344  | 2.231  | 3.178  | 3.365  | 3.201  | 4.806  | 3.401  | 18717 | PIP5K1C   | NM_008844_10_+_1 |
| Pip4k2a   | 8.049  | 8.040  | 8.607  | 8.542  | 9.667  | 9.582  | 9.119  | 8.721  | 8.832  | 8.776  | 18718 | PIP4K2A   | NM_008845_2_+_1  |
| Pip5k1b   | -2.647 | -2.883 | -3.608 | -1.589 | -4.094 | -1.633 | -2.154 | -0.511 | -0.808 | -1.091 | 18719 | PIP5K1B   | NM_008846_19_+_1 |
| Pip5k1a   | -2.240 | 2.143  | 2.527  | 1.195  | 3.114  | 2.790  | 3.075  | 2.061  | 3.224  | 1.977  | 18720 | PIP5K1A   | NM_008847_3_+_1  |
| Pira6     | -4.806 | 0.989  | -4.756 | 0.844  | -4.222 | 2.265  | 0.462  | 5.995  | 2.239  | 7.382  | 18729 | NA        | NM_008848_7_+_1  |
| Pitpna    | 9.105  | 9.319  | 8.817  | 8.757  | 8.860  | 8.715  | 9.260  | 9.198  | 9.989  | 9.799  | 18738 | PITPNA    | NM_008850_11_+_1 |
| Pitpnm1   | -0.369 | -1.368 | 1.851  | 2.513  | 0.851  | 1.170  | 2.528  | 1.234  | 4.241  | 3.490  | 18739 | PITPNM1   | NM_008851_19_+_1 |
| Pja1      | -1.786 | 0.392  | -4.377 | -3.481 | -3.849 | -1.910 | -1.724 | -3.875 | -4.823 | -1.707 | 18744 | PJA1      | NM_008853_X_+_1  |
| Prkaca    | 3.797  | 4.233  | 4.324  | 4.733  | 4.328  | 4.636  | 4.262  | 4.732  | 4.895  | 5.219  | 18747 | PRKACA    | NM_008854_8_+_1  |
| Prkcb     | 7.542  | 7.594  | 7.485  | 7.760  | 9.600  | 9.761  | 8.716  | 8.465  | 7.783  | 8.010  | 18751 | PRKCB     | NM_008855_7_+_1  |
| Prkch     | 3.028  | 2.401  | 5.335  | 5.325  | 5.985  | 5.894  | 6.283  | 6.048  | 6.960  | 6.831  | 18755 | PRKCH     | NM_008856_12_+_1 |
| Prkci     | 2.858  | 2.944  | 3.811  | 3.771  | 3.091  | 3.354  | 3.080  | 3.713  | 4.798  | 4.965  | 18759 | PRKCI     | NM_008857_3_+_1  |
| Prkcq     | -0.536 | -0.814 | 0.713  | 0.445  | -0.983 | 0.634  | 0.942  | 2.593  | -0.603 | -0.060 | 18761 | PRKCQ     | NM_008859_2_+_1  |
| Prkcz     | -0.607 | -3.553 | -0.570 | -0.166 | 0.712  | 2.798  | -0.781 | 2.095  | 0.287  | -0.264 | 18762 | PRK CZ    | NM_008860_4_+_1  |
| Pkd2      | -0.883 | 1.919  | -1.867 | 0.420  | -0.976 | -0.867 | 0.839  | 1.896  | 2.557  | 3.875  | 18764 | PKD2      | NM_008861_5_+_1  |
| Pkia      | -4.981 | -2.160 | -4.120 | -4.392 | -3.241 | -2.596 | -4.844 | -2.401 | -4.981 | -4.981 | 18767 | PKIA      | NM_008862_3_+_1  |

|          |        |        |        |        |        |        |        |        |        |        |           |          |                  |
|----------|--------|--------|--------|--------|--------|--------|--------|--------|--------|--------|-----------|----------|------------------|
| Pkib     | 3.520  | 3.347  | 4.155  | 4.241  | 3.250  | 3.256  | 1.761  | 1.928  | 0.640  | -0.111 | 18768     | PKIB     | NM_008863_10_+_1 |
| Lypla1   | 6.271  | 6.691  | 6.326  | 6.291  | 6.135  | 6.072  | 6.315  | 6.386  | 6.702  | 7.076  | 18777     | LYPLA1   | NM_008866_1_+_1  |
| Pla2r1   | -4.981 | -4.981 | -4.981 | -4.981 | -4.981 | -4.981 | -4.894 | -4.934 | -3.750 | -1.401 | 18779     | PLA2R1   | NM_008867_2_-_1  |
| Pla2g4a  | 2.286  | 3.637  | 3.016  | 3.848  | 4.555  | 4.841  | 4.708  | 5.055  | 5.000  | 5.210  | 18783     | PLA2G4A  | NM_008869_1_-_1  |
| Serpine1 | -4.981 | -4.981 | -3.333 | -3.957 | -3.921 | -3.514 | -4.677 | -3.995 | -4.981 | -4.981 | 18787     | SERPINE1 | NM_008871_5_-_1  |
| Plat     | -2.454 | -2.681 | -1.084 | 0.570  | -3.042 | -1.806 | -4.955 | -4.865 | -3.531 | -4.981 | 18791     | PLAT     | NM_008872_8_+_1  |
| Plau     | -2.686 | -0.347 | -2.873 | -3.042 | -0.313 | -0.555 | -0.105 | 0.060  | -0.837 | 0.298  | 18792     | PLAU     | NM_008873_14_+_1 |
| Plcb3    | -2.906 | -3.760 | -2.536 | -4.501 | -3.334 | -2.780 | -4.269 | -0.600 | -3.600 | -4.419 | 18797     | PLCB3    | NM_008874_19_-_1 |
| Pld1     | 0.605  | -1.208 | -3.333 | -0.817 | -0.090 | -1.185 | 0.251  | -0.965 | -0.224 | 0.902  | 18805     | PLD1     | NM_008875_3_+_1  |
| Pld2     | 2.924  | 2.751  | 4.384  | 4.210  | 4.644  | 5.039  | 4.257  | 4.081  | 3.517  | 4.269  | 18806     | PLD2     | NM_008876_11_+_1 |
| Plg      | -4.981 | -4.981 | -4.981 | -4.981 | -4.972 | -4.806 | -1.646 | -4.840 | -4.981 | -4.981 | 18815     | PLG      | NM_008877_17_+_1 |
| Serpinf2 | -3.668 | -1.696 | -1.242 | -1.720 | -4.157 | -4.416 | -3.565 | -3.710 | -4.981 | -2.601 | 18816     | SERPINF2 | NM_008878_11_-_1 |
| Lcp1     | 8.404  | 7.478  | 10.408 | 10.278 | 10.989 | 10.504 | 10.529 | 10.255 | 10.610 | 10.701 | 18826     | LCP1     | NM_008879_14_+_1 |
| Plscr2   | -4.981 | -4.981 | -3.421 | -2.856 | -4.970 | -4.534 | -4.923 | -4.691 | -2.858 | -4.981 | 18828     | NA       | NM_008880_9_+_1  |
| Plxna1   | -0.505 | -1.365 | 1.262  | 1.878  | 1.095  | 1.010  | 2.820  | 2.700  | 1.076  | 1.991  | 18844     | PLXNA1   | NM_008881_6_-_1  |
| Plxna2   | 1.268  | 0.471  | -4.923 | -2.912 | -3.091 | -3.115 | -4.967 | -4.148 | -4.981 | -1.962 | 18845     | PLXNA2   | NM_008882_1_+_1  |
| Plxna3   | -1.926 | -1.716 | 0.519  | -0.034 | -0.749 | 0.491  | -1.159 | -0.543 | -0.612 | -0.405 | 18846     | PLXNA3   | NM_008883_X_+_1  |
| Pml      | 6.206  | 5.751  | 4.025  | 4.648  | 2.971  | 3.953  | 3.336  | 4.025  | 4.362  | 3.149  | 18854     | PML      | NM_008884_9_-_1  |
| Pmp22    | -4.847 | -4.126 | -4.979 | -4.978 | -4.565 | -4.964 | -4.959 | -2.787 | -4.981 | -3.265 | 18858     | PMP22    | NM_008885_11_+_1 |
| Pms2     | 2.827  | 2.758  | 2.807  | 2.764  | 3.611  | 3.303  | 2.978  | 2.848  | 2.896  | 2.712  | 18861     | PMS2     | NM_008886_5_+_1  |
| Ppp1r14b | 7.289  | 7.362  | 5.841  | 5.953  | 4.913  | 4.978  | 5.216  | 5.510  | 4.494  | 4.241  | 18938     | PPP1R14B | NM_008889_19_+_1 |
| Pnn      | 6.821  | 6.771  | 6.976  | 6.773  | 7.400  | 7.362  | 6.808  | 6.662  | 6.115  | 6.117  | 18949     | PNN      | NM_008891_12_+_1 |
| Pola1    | 2.648  | 2.498  | 3.776  | 4.051  | 5.235  | 5.073  | 4.646  | 4.104  | 2.278  | 2.541  | 18968     | POLA1    | NM_008892_X_-_1  |
| Pola2    | 3.935  | 3.769  | 3.166  | 3.198  | 4.012  | 3.917  | 3.757  | 3.766  | 3.260  | 2.741  | 18969     | POLA2    | NM_008893_19_-_1 |
| Pold2    | 5.551  | 5.058  | 3.803  | 3.955  | 4.073  | 3.796  | 3.889  | 3.757  | 2.874  | 2.206  | 18972     | POLD2    | NM_008894_11_-_1 |
| Pomc     | -3.357 | -2.829 | -3.971 | -4.282 | -4.283 | -4.655 | -3.813 | -4.453 | -4.148 | -4.454 | 18976     | POMC     | NM_008895_12_+_1 |
| Por      | 4.739  | 5.002  | 4.721  | 5.150  | 5.927  | 6.148  | 5.730  | 5.907  | 6.417  | 6.114  | 18984     | POR      | NM_008898_5_+_1  |
| Pou3f2   | -3.090 | -4.981 | -4.196 | -4.705 | -4.335 | -4.994 | -4.978 | -4.852 | -4.190 | -4.981 | 18992     | POU3F2   | NM_008899_4_-_1  |
| Endou    | -4.981 | -4.981 | -3.637 | -2.471 | -4.779 | -2.562 | -2.759 | -0.439 | -3.228 | -4.981 | 19011     | ENDOOU   | NM_008902_15_-_1 |
| Plpp1    | 2.329  | 1.542  | 6.829  | 6.708  | 0.624  | 0.941  | 1.393  | 2.338  | 0.429  | 0.458  | 19012     | NA       | NM_008903_13_+_1 |
| Ppargc1a | -1.725 | -4.981 | -2.253 | -4.924 | 1.042  | 0.773  | -3.498 | -4.943 | -3.785 | -4.981 | 19017     | PPARGC1A | NM_008904_5_-_1  |
| Ppfibp2  | 3.472  | 2.876  | 6.664  | 6.402  | 4.739  | 4.314  | 4.603  | 4.863  | 4.239  | 4.687  | 19024     | PPFIBP2  | NM_008905_7_+_1  |
| Ctsa     | 9.877  | 9.808  | 7.399  | 7.804  | 9.433  | 9.710  | 9.495  | 9.892  | 10.315 | 10.710 | 19025     | CTSA     | NM_008906_2_+_1  |
| Ppia     | 12.612 | 12.807 | 11.611 | 11.605 | 11.709 | 11.615 | 11.422 | 11.520 | 10.338 | 10.217 | 268373    | PPIA     | NM_008907_11_+_1 |
| Ppic     | 1.513  | 3.470  | -2.623 | -0.965 | -3.491 | -1.789 | -4.942 | -0.865 | -3.242 | -1.996 | 19038     | PPIC     | NM_008908_18_-_1 |
| Ppl      | -1.313 | -2.583 | -3.585 | -4.424 | -2.605 | -1.626 | -4.910 | -1.153 | -4.981 | -3.233 | 19041     | PPL      | NM_008909_16_-_1 |
| Ppm1a    | 4.650  | 4.847  | 4.273  | 4.168  | 4.042  | 4.001  | 4.571  | 4.327  | 4.784  | 4.788  | 19042     | PPM1A    | NM_008910_12_+_1 |
| Ppox     | 5.123  | 3.918  | 4.693  | 3.858  | 5.201  | 4.611  | 4.923  | 4.097  | 4.753  | 4.140  | 19044     | PPOX     | NM_008911_1_-_1  |
| Ppp3ca   | 0.435  | -3.718 | -1.077 | 1.351  | 0.639  | 0.671  | 0.336  | -1.937 | 0.044  | 1.104  | 19055     | PPP3CA   | NM_008913_3_+_1  |
| Ppp3cb   | 0.062  | 3.632  | 2.500  | 2.240  | 2.984  | 3.239  | 2.738  | 2.720  | 2.152  | 3.426  | 19056     | PPP3CB   | NM_008914_14_-_1 |
| Ppp3cc   | 4.732  | 4.885  | 2.899  | 3.678  | 2.354  | 3.660  | 2.153  | 4.390  | 0.711  | 1.198  | 19057     | PPP3CC   | NM_008915_14_-_1 |
| Inpp5k   | 7.367  | 7.767  | 6.676  | 6.637  | 6.794  | 6.827  | 6.744  | 6.876  | 7.435  | 7.200  | 19062     | INPP5K   | NM_008916_11_+_1 |
| Ppt1     | 7.987  | 8.115  | 12.267 | 12.450 | 7.587  | 7.736  | 8.167  | 9.610  | 8.689  | 9.042  | 19063     | PPT1     | NM_008917_4_+_1  |
| Prg2     | -4.981 | -1.347 | -1.382 | 0.864  | 1.836  | 1.763  | 0.215  | 2.421  | -4.981 | -2.969 | 19074     | PRG2     | NM_008920_2_+_1  |
| Prim1    | 3.545  | 4.014  | 3.982  | 4.222  | 4.848  | 4.596  | 4.140  | 4.040  | 1.568  | 1.122  | 19075     | PRIM1    | NM_008921_10_+_1 |
| Prim2    | 3.082  | 3.484  | 3.255  | 3.776  | 3.657  | 3.646  | 3.416  | 3.536  | 2.421  | 2.530  | 19076     | PRIM2    | NM_008922_1_-_1  |
| Prkar1b  | 0.276  | -2.375 | -1.627 | -0.952 | -0.671 | -1.192 | -0.912 | 0.773  | -1.085 | -0.201 | 19085     | PRKAR1B  | NM_008923_5_-_1  |
| Prkar2a  | 1.580  | 1.767  | 5.087  | 5.092  | 4.916  | 4.439  | 4.804  | 4.731  | 4.548  | 4.801  | 19087     | PRKAR2A  | NM_008924_9_+_1  |
| Prkcsk   | 4.024  | 5.259  | 4.190  | 5.102  | 4.335  | 4.918  | 4.068  | 4.583  | 4.320  | 4.867  | 19089     | PRKCSH   | NM_008925_9_+_1  |
| Map2k1   | 6.129  | 6.662  | 6.856  | 7.212  | 7.657  | 8.055  | 7.575  | 7.851  | 8.115  | 8.408  | 26395     | MAP2K1   | NM_008927_9_-_1  |
| Map2k3   | 5.553  | 5.691  | 6.433  | 6.670  | 5.845  | 5.825  | 6.053  | 6.166  | 6.426  | 6.381  | 26397     | MAP2K3   | NM_008928_11_+_1 |
| Dnajc3   | 7.710  | 7.573  | 7.281  | 7.233  | 6.546  | 6.541  | 6.641  | 7.187  | 6.842  | 7.099  | 100037258 | DNAJC3   | NM_008929_14_+_1 |
| Prm2     | -4.981 | -4.981 | -4.015 | -2.339 | -4.984 | -4.984 | -4.952 | -4.967 | -4.981 | -4.981 | 19119     | NA       | NM_008933_16_+_1 |
| Prom1    | -3.189 | -4.981 | -4.981 | -4.977 | -4.977 | -4.981 | -4.856 | -1.983 | -1.122 | -4.973 | 19126     | PROM1    | NM_008935_5_-_1  |
| Prox1    | -4.981 | -4.981 | -4.981 | -4.981 | -4.913 | -4.159 | -3.537 | -3.598 | -4.394 | -3.386 | 19130     | PROX1    | NM_008937_1_-_1  |
| Prss12   | -4.981 | -4.981 | -4.979 | -2.567 | -4.633 | -4.064 | -3.993 | -2.151 | -3.204 | -3.510 | 19142     | PRSS12   | NM_008939_3_+_1  |
| Klk8     | -0.340 | 0.142  | 2.141  | 3.612  | 3.207  | 4.396  | 2.039  | 2.840  | -0.279 | -0.483 | 259277    | KLK8     | NM_008940_7_+_1  |
| Npepps   | 4.046  | 4.109  | 4.655  | 5.116  | 4.563  | 4.882  | 4.351  | 4.525  | 4.465  | 5.115  | 19155     | NPEPPS   | NM_008942_11_-_1 |
| Psen1    | 6.463  | 6.447  | 6.784  | 6.750  | 6.343  | 6.382  | 6.597  | 6.836  | 7.759  | 7.654  | 19164     | PSEN1    | NM_008943_12_+_1 |
| Psma2    | 9.101  | 9.190  | 8.573  | 8.580  | 8.396  | 8.297  | 8.320  | 8.267  | 7.793  | 7.475  | 19166     | PSMA2    | NM_008944_13_+_1 |
| Psmb4    | 8.193  | 8.146  | 7.921  | 7.939  | 7.524  | 7.618  | 7.459  | 7.479  | 7.082  | 6.771  | 19172     | PSMB4    | NM_008945_3_-_1  |
| Psmb6    | 8.741  | 8.696  | 8.146  | 8.180  | 8.029  | 7.920  | 8.077  | 8.026  | 7.361  | 7.057  | 19175     | PSMB6    | NM_008946_11_+_1 |
| Psmc1    | 6.855  | 6.651  | 6.732  | 7.181  | 6.672  | 6.802  | 6.652  | 6.946  | 6.620  | 6.599  | 19179     | PSMC1    | NM_008947_12_+_1 |
| Psmc3    | 7.785  | 7.683  | 7.484  | 7.744  | 7.337  | 7.269  | 7.317  | 7.415  | 7.026  | 6.837  | 19182     | PSMC3    | NM_008948_2_+_1  |
| Psmc3ip  | 3.360  | 5.719  | 2.270  | 4.346  | 3.184  | 4.360  | 2.711  | 3.908  | 0.176  | 3.241  | 19183     | PSMC3IP  | NM_008949_11_-_1 |
| Psmc5    | 7.222  | 7.379  | 7.009  | 7.225  | 7.148  | 6.997  | 6.764  | 6.796  | 6.258  | 6.122  | 19184     | PSMC5    | NM_008950_11_+_1 |
| Psmc4    | 6.903  | 6.991  | 6.790  | 6.819  | 6.961  | 6.807  | 6.757  | 6.609  | 6.412  | 6.099  | 19185     | PSMD4    | NM_008951_3_-_1  |
| Pspn     | -2.925 | -4.981 | -4.641 | -4.051 | -4.427 | -4.968 | -4.765 | -4.932 | -3.925 | -4.981 | 19197     | PSPN     | NM_008954_17_-_1 |
| Ptbp1    | 6.082  | 6.161  | 6.380  | 6.414  | 6.593  | 6.274  | 6.314  | 6.080  | 6.222  | 5.708  | 19205     | PTBP1    | NM_008956_10_+_1 |
| Ptch1    | 2.122  | 2.157  | 1.110  | 0.681  | 2.325  | 2.044  | 0.714  | 0.630  | -0.231 | 0.982  | 19206     | PTCH1    | NM_008957_13_-_1 |
| Ptdss1   | 5.498  | 5.571  | 6.366  | 6.167  | 5.331  | 5.315  | 5.317  | 5.632  | 5.904  | 5.915  | 19210     | PTDSS1   | NM_008959_13_+_1 |
| Pten     | 6.377  | 6.703  | 7.037  | 6.971  | 7.357  | 7.046  | 7.420  | 7.252  | 7.398  | 7.997  | 19211     | PTEN     | NM_008960_19_+_1 |
| Pter     | -4.458 | -1.218 | 1.140  | 1.630  | -0.370 | -0.539 | -0.463 | 0.427  | 0.178  | 1.031  | 19212     | PTER     | NM_008961_2_+_1  |
| Ptgds    | 2.871  | 3.921  | -4.981 | -4.981 | -4.981 | -4.981 | -4.899 | -4.851 | -4.981 | -4.981 | 19215     | PTGDS    | NM_008963_2_-_1  |

|          |        |        |        |        |        |        |        |        |        |        |        |          |                  |
|----------|--------|--------|--------|--------|--------|--------|--------|--------|--------|--------|--------|----------|------------------|
| Ptger2   | -1.818 | -4.981 | 2.977  | 2.941  | -1.683 | 0.622  | 0.057  | 0.948  | 3.679  | 3.455  | 19217  | PTGER2   | NM_008964_14_+_1 |
| Ptger4   | 5.310  | 5.447  | 5.021  | 5.081  | 4.702  | 4.685  | 4.956  | 5.251  | 5.451  | 5.453  | 19219  | PTGER4   | NM_008965_15_-_1 |
| Ptgfr    | -4.981 | -4.981 | -4.240 | -4.542 | -4.974 | -4.974 | -4.829 | -4.753 | -4.394 | -4.316 | 19220  | PTGFR    | NM_008966_3_-_1  |
| Ptgir    | -3.563 | -4.981 | 0.642  | 0.156  | -2.500 | -2.986 | 3.009  | 3.035  | 6.099  | 5.808  | 19222  | PTGIR    | NM_008967_7_+_1  |
| Ptgis    | 0.500  | -4.981 | 6.060  | 5.621  | -0.246 | -3.711 | -0.638 | -1.041 | -1.215 | -4.981 | 19223  | PTGIS    | NM_008968_2_-_1  |
| Ptgs1    | 2.522  | -0.742 | 1.994  | 2.419  | 2.799  | 2.090  | 2.557  | 3.622  | 4.182  | 4.446  | 19224  | PTGS1    | NM_008969_2_+_1  |
| Twf1     | 4.383  | 4.691  | 4.736  | 5.253  | 4.226  | 4.666  | 4.572  | 4.781  | 4.874  | 5.547  | 19230  | TWF1     | NM_008971_15_-_1 |
| Ptma     | 10.395 | 10.209 | 10.466 | 10.401 | 10.556 | 10.380 | 10.303 | 10.235 | 9.029  | 8.927  | 19231  | NA       | NM_008972_1_+_1  |
| Ptn      | -3.090 | -1.314 | -4.821 | -4.973 | -4.978 | -4.978 | -4.981 | -4.981 | -4.981 | -4.981 | 19242  | PTN      | NM_008973_6_-_1  |
| Ptp4a2   | 7.443  | 5.812  | 8.105  | 7.217  | 8.338  | 7.004  | 8.299  | 7.597  | 8.154  | 7.820  | 19244  | PTP4A2   | NM_008974_4_+_1  |
| Ptp4a3   | 7.691  | 7.417  | 4.544  | 4.536  | 6.124  | 7.093  | 5.015  | 5.713  | 2.551  | 1.844  | 19245  | PTP4A3   | NM_008975_15_+_1 |
| Ptpn14   | -3.349 | -1.340 | -2.564 | -0.821 | -0.036 | -0.746 | -3.098 | -0.183 | -2.780 | -1.331 | 19250  | PTPN14   | NM_008976_1_+_1  |
| Ptpn2    | 6.727  | 6.792  | 6.322  | 6.366  | 6.281  | 6.408  | 6.117  | 6.132  | 5.492  | 5.635  | 19255  | PTPN2    | NM_008977_18_-_1 |
| Ptpn22   | 2.115  | 0.645  | 6.228  | 5.853  | 7.412  | 7.345  | 6.957  | 6.342  | 6.962  | 6.400  | 19260  | PTPN22   | NM_008979_3_+_1  |
| Ptpra    | -4.275 | -3.998 | -3.275 | -2.969 | -2.773 | -3.761 | -2.710 | -3.242 | -1.013 | -2.091 | 19262  | PTPRA    | NM_008980_2_+_1  |
| Ptprj    | 5.814  | 5.753  | 5.801  | 5.826  | 6.381  | 6.485  | 6.603  | 6.655  | 7.536  | 7.771  | 19271  | PTPRJ    | NM_008982_2_-_1  |
| Ptprk    | -4.981 | -4.981 | -4.637 | -2.713 | -4.948 | -1.050 | -4.906 | -0.637 | -4.981 | -0.734 | 19272  | PTPRK    | NM_008983_10_+_1 |
| Ptprm    | -1.381 | -4.981 | -2.461 | 0.090  | -0.136 | -0.615 | -1.017 | 0.464  | -1.971 | -1.420 | 19274  | PTPRM    | NM_008984_17_-_1 |
| Ptprn    | -1.253 | -2.126 | -4.759 | -3.042 | -3.680 | -4.011 | -4.692 | -4.319 | -3.043 | -4.316 | 19275  | PTPRN    | NM_008985_1_-_1  |
| Ptrf     | -2.948 | -4.981 | -2.128 | -1.756 | -4.321 | -3.116 | -3.009 | -2.798 | -1.616 | -2.605 | 19285  | PTRF     | NM_008986_11_-_1 |
| Pura     | 3.847  | 3.784  | 4.178  | 4.005  | 4.269  | 4.068  | 4.082  | 3.755  | 3.619  | 3.201  | 19290  | PURA     | NM_008989_18_+_1 |
| Nectin2  | -4.981 | -2.437 | -1.248 | -4.336 | -0.876 | -3.179 | -1.888 | -4.756 | 0.163  | -4.981 | 19294  | NECTIN2  | NM_008990_7_-_1  |
| Abcd3    | 3.782  | 4.089  | 3.845  | 4.561  | 3.549  | 4.019  | 3.285  | 4.080  | 4.494  | 4.888  | 19299  | ABCD3    | NM_008991_3_-_1  |
| Abcd4    | 2.614  | 3.042  | 2.615  | 2.892  | 2.481  | 2.884  | 2.829  | 3.055  | 3.294  | 3.514  | 19300  | ABCD4    | NM_008992_12_-_1 |
| Pxmp2    | -0.373 | -2.883 | 0.652  | 1.042  | 0.718  | 1.020  | 0.097  | 0.625  | 0.331  | -0.316 | 19301  | PXMP2    | NM_008993_5_-_1  |
| Pex2     | 2.705  | 1.787  | 0.764  | 1.303  | 0.903  | 1.659  | 1.349  | 0.894  | 1.053  | 2.095  | 19302  | PEX2     | NM_008994_3_-_1  |
| Pex5     | -1.526 | 0.980  | 0.706  | 1.338  | -1.171 | -1.835 | -0.990 | 0.038  | 0.363  | 1.171  | 19305  | PEX5     | NM_008995_6_-_1  |
| Rab1a    | 7.231  | 7.300  | 7.338  | 7.409  | 7.049  | 6.933  | 7.347  | 7.497  | 7.853  | 8.073  | 19324  | RAB1A    | NM_008996_11_+_1 |
| Rab11b   | 7.252  | 7.348  | 7.429  | 7.303  | 7.180  | 7.063  | 7.472  | 7.495  | 7.801  | 7.596  | 19326  | RAB11B   | NM_008997_17_-_1 |
| Rab17    | -4.894 | -4.852 | -4.960 | -4.960 | -4.513 | -2.146 | -4.974 | -4.963 | -4.981 | -4.973 | 19329  | RAB17    | NM_008998_1_-_1  |
| Rab23    | 0.680  | 0.959  | 1.284  | 1.519  | 1.441  | 1.092  | 1.127  | -0.059 | 1.072  | 0.356  | 19335  | RAB23    | NM_008999_1_+_1  |
| Rab24    | 8.027  | 8.078  | 5.540  | 5.701  | 7.201  | 7.450  | 6.553  | 6.727  | 6.775  | 6.765  | 19336  | RAB24    | NM_009000_13_-_1 |
| Rab3a    | 2.958  | 2.867  | 2.094  | 1.781  | 1.475  | 1.609  | 1.896  | 1.976  | 1.804  | 2.329  | 19339  | RAB3A    | NM_009001_8_+_1  |
| Rab4a    | 0.987  | 2.009  | -0.839 | 1.206  | -0.094 | 1.023  | 0.428  | 1.072  | -1.256 | 0.647  | 19341  | RAB4A    | NM_009003_8_+_1  |
| Kif20a   | -0.841 | 0.179  | 3.296  | 3.941  | 3.819  | 3.174  | 2.894  | 2.798  | 2.033  | 1.887  | 19348  | KIF20A   | NM_009004_18_+_1 |
| Rab7     | 7.999  | 8.027  | 8.486  | 8.540  | 8.012  | 7.990  | 8.250  | 8.363  | 8.897  | 8.783  | 19349  | RAB7A    | NM_009005_6_-_1  |
| Map4k2   | 5.315  | 5.544  | 4.411  | 4.227  | 4.834  | 4.639  | 4.419  | 4.820  | 5.254  | 5.131  | 26412  | MAP4K2   | NM_009006_19_+_1 |
| Rac1     | 8.090  | 8.256  | 9.095  | 9.228  | 8.987  | 9.085  | 9.071  | 9.374  | 9.929  | 10.130 | 19353  | RAC1     | NM_009007_5_-_1  |
| Rac2     | 10.896 | 10.998 | 8.155  | 8.480  | 9.633  | 9.646  | 9.077  | 9.391  | 9.620  | 9.466  | 19354  | RAC2     | NM_009008_15_-_1 |
| Rad21    | 4.912  | 5.382  | 4.899  | 4.957  | 5.227  | 5.131  | 5.411  | 4.966  | 4.838  | 4.938  | 19357  | RAD21    | NM_009009_15_-_1 |
| Rad23a   | 4.680  | 4.398  | 4.985  | 4.547  | 5.298  | 4.762  | 4.795  | 4.239  | 4.886  | 3.909  | 19358  | RAD23A   | NM_009010_8_-_1  |
| Rad23b   | 4.307  | 3.778  | 5.255  | 5.039  | 4.948  | 4.253  | 5.210  | 4.589  | 5.008  | 4.535  | 19359  | RAD23B   | NM_009011_4_+_1  |
| Rad50    | 4.995  | 5.241  | 5.773  | 5.677  | 5.954  | 5.889  | 5.594  | 5.145  | 4.187  | 4.053  | 19360  | RAD50    | NM_009012_11_-_1 |
| Rad51ap1 | 2.403  | 1.762  | 2.400  | 2.232  | 3.233  | 2.568  | 2.603  | 1.978  | 1.396  | -0.282 | 19362  | RAD51AP1 | NM_009013_6_-_1  |
| Rad51b   | 4.937  | 5.870  | 1.747  | 2.151  | 1.159  | 0.359  | 0.369  | 0.791  | -1.840 | -0.332 | 19363  | RAD51B   | NM_009014_12_+_1 |
| Rad54l   | -4.813 | -2.449 | 1.467  | 0.987  | 2.387  | 1.827  | 0.658  | -0.194 | 0.254  | -0.749 | 19366  | RAD54L   | NM_009015_4_-_1  |
| Raet1a   | -4.981 | -4.981 | -4.333 | -4.979 | -3.551 | -4.442 | -4.981 | -4.981 | -2.647 | -4.981 | 19368  | NA       | NM_009016_10_+_1 |
| Raet1b   | -4.981 | -4.981 | -4.953 | -4.358 | -2.846 | -3.442 | -4.378 | -3.707 | -4.981 | -2.649 | 19369  | NA       | NM_009017_10_+_1 |
| Raet1c   | -4.981 | -3.145 | -4.885 | -3.891 | -4.968 | -4.377 | -3.599 | -4.028 | -2.918 | -2.610 | 19370  | NA       | NM_009018_10_+_1 |
| Rag1     | -1.017 | -2.681 | -4.881 | -4.981 | -4.981 | -4.981 | -4.883 | -4.978 | -4.981 | -4.981 | 19373  | RAG1     | NM_009019_2_-_1  |
| Rai1     | 4.295  | 3.605  | 2.913  | 2.745  | 3.315  | 3.223  | 2.777  | 3.042  | 3.330  | 3.447  | 19377  | RAI1     | NM_009021_11_+_1 |
| Aldh1a2  | -3.843 | -4.981 | 2.160  | 3.937  | 2.916  | 3.131  | 2.531  | 1.888  | -1.483 | -0.826 | 19378  | ALDH1A2  | NM_009022_9_+_1  |
| Rapsn    | -1.922 | -2.349 | -3.165 | -2.606 | -1.611 | -2.980 | -0.591 | -1.871 | -0.994 | -4.981 | 19400  | RAPSN    | NM_009023_2_+_1  |
| Rara     | 3.762  | 3.060  | 2.249  | 2.794  | 3.244  | 2.335  | 4.457  | 4.585  | 6.632  | 6.339  | 19401  | RARA     | NM_009024_11_+_1 |
| Rasa3    | 5.680  | 5.832  | 5.376  | 5.401  | 3.383  | 2.826  | 6.386  | 6.893  | 8.876  | 8.618  | 19414  | RASA3    | NM_009025_8_-_1  |
| Rasd1    | -2.092 | -4.981 | 0.401  | 0.105  | -2.180 | -2.297 | -1.437 | -0.633 | -3.189 | -1.900 | 19416  | RASD1    | NM_009026_11_-_1 |
| Rasgrf2  | -0.009 | 0.267  | -0.495 | -0.425 | 2.380  | 2.014  | 2.233  | 1.939  | 1.856  | 2.854  | 19418  | RASGRF2  | NM_009027_13_-_1 |
| Rasl2-9  | 3.838  | 3.468  | 1.705  | 1.757  | 1.242  | 1.107  | 0.396  | -0.618 | 0.123  | -0.103 | 19428  | NA       | NM_009028_7_-_1  |
| Rb1      | 4.752  | 5.162  | 5.276  | 5.655  | 6.210  | 6.318  | 6.211  | 6.304  | 6.672  | 7.186  | 19645  | RB1      | NM_009029_14_-_1 |
| Rbbp4    | 7.707  | 7.788  | 7.825  | 7.980  | 8.106  | 7.998  | 7.662  | 7.848  | 7.438  | 7.589  | 19646  | RBBP4    | NM_009030_4_-_1  |
| Rbbp7    | 7.277  | 7.201  | 8.629  | 8.832  | 8.497  | 8.308  | 7.833  | 7.568  | 5.622  | 5.570  | 245688 | RBBP7    | NM_009031_X_+_1  |
| Rbm4     | 3.192  | 3.963  | 3.607  | 3.912  | 3.133  | 3.154  | 2.450  | 3.048  | 3.121  | 3.046  | 19653  | RBM4     | NM_009032_19_-_1 |
| Rbmxl1   | 5.566  | 5.497  | 5.714  | 5.814  | 5.645  | 5.563  | 5.281  | 5.546  | 4.958  | 5.004  | 19656  | NA       | NM_009033_8_-_1  |
| Rbpj     | 1.285  | 1.060  | 5.071  | 4.564  | 4.301  | 3.495  | 4.555  | 3.831  | 4.368  | 2.793  | 19664  | RBPJ     | NM_009035_5_+_1  |
| Rcn1     | 4.186  | 4.233  | 2.994  | 3.133  | 3.767  | 3.974  | 3.107  | 2.853  | 1.225  | 0.664  | 19672  | RCN1     | NM_009037_2_-_1  |
| Rcvrn    | -2.948 | -4.981 | -4.981 | -4.981 | -4.981 | -4.981 | -4.981 | -4.981 | -3.925 | -3.386 | 19674  | RCVRN    | NM_009038_11_+_1 |
| Rdx      | 3.454  | 0.638  | 2.683  | 1.802  | 1.694  | 1.002  | 3.789  | 2.991  | 4.477  | 4.199  | 19684  | RDX      | NM_009041_9_+_1  |
| Rel      | 4.324  | 4.298  | 5.402  | 5.099  | 6.708  | 6.816  | 5.984  | 5.512  | 4.816  | 5.187  | 19696  | REL      | NM_009044_11_-_1 |
| Rela     | 6.316  | 6.254  | 6.476  | 6.560  | 6.832  | 6.730  | 6.875  | 6.849  | 7.294  | 7.177  | 19697  | RELA     | NM_009045_19_+_1 |
| Relb     | 2.588  | 0.521  | 2.620  | 3.248  | 5.189  | 5.078  | 4.701  | 3.606  | 1.466  | 3.035  | 19698  | RELB     | NM_009046_7_-_1  |
| Rem1     | 0.448  | 0.638  | 2.309  | 2.307  | 4.377  | 4.222  | 3.710  | 2.619  | 3.387  | 2.815  | 19700  | REM1     | NM_009047_2_+_1  |
| Reps1    | 3.718  | 3.289  | 4.062  | 3.968  | 4.310  | 3.841  | 4.010  | 4.205  | 4.400  | 3.945  | 19707  | REPS1    | NM_009048_10_+_1 |
| Ret      | -4.981 | -1.816 | -4.258 | -4.950 | -4.962 | -4.648 | -4.981 | -4.981 | -4.981 | -4.981 | 19713  | RET      | NM_009050_6_-_1  |
| Bex1     | -3.563 | -0.544 | -4.958 | -3.374 | -2.386 | -2.248 | -4.914 | -2.383 | -4.981 | -2.969 | 19716  | NA       | NM_009052_X_-_1  |

|         |        |        |        |        |        |        |        |        |        |        |        |         |                 |
|---------|--------|--------|--------|--------|--------|--------|--------|--------|--------|--------|--------|---------|-----------------|
| Rfng    | 3.710  | 3.606  | 4.187  | 4.194  | 4.003  | 4.014  | 3.875  | 4.127  | 4.735  | 4.657  | 19719  | RFNG    | NM_009053_11_-1 |
| Trim27  | 5.818  | 6.047  | 6.254  | 6.438  | 6.118  | 6.213  | 6.107  | 6.162  | 5.742  | 5.521  | 19720  | TRIM27  | NM_009054_13_+1 |
| Rfx1    | 2.568  | 2.588  | 2.724  | 2.781  | 2.960  | 2.740  | 2.985  | 3.425  | 4.559  | 4.525  | 19724  | RFX1    | NM_009055_8_+1  |
| Rfx2    | 1.909  | 1.795  | -1.913 | -0.599 | -0.814 | -0.079 | 1.890  | 2.001  | 5.068  | 4.816  | 19725  | RFX2    | NM_009056_17_-1 |
| Slc50a1 | 7.530  | 7.546  | 5.890  | 5.759  | 6.284  | 6.430  | 6.298  | 6.281  | 5.598  | 5.106  | 19729  | SLC50A1 | NM_009057_3_-1  |
| Ralgds  | -2.825 | 1.160  | -2.625 | -0.897 | -2.048 | -0.865 | -1.319 | -1.719 | -0.635 | -0.764 | 19730  | RALGDS  | NM_009058_2_+1  |
| Rgl2    | 2.409  | 2.364  | 3.721  | 3.627  | 3.965  | 3.972  | 3.728  | 3.651  | 4.377  | 4.454  | 19732  | RGL2    | NM_009059_17_+1 |
| Rgs2    | 8.924  | 9.430  | 10.100 | 9.843  | 11.587 | 11.692 | 10.861 | 10.373 | 9.838  | 9.763  | 19735  | RGS2    | NM_009061_1_-1  |
| Rgs4    | -4.981 | -4.981 | -4.897 | -4.383 | -4.909 | -3.498 | -4.008 | -3.257 | -4.981 | -4.981 | 19736  | RGS4    | NM_009062_1_-1  |
| Ring1   | 3.957  | 3.738  | 3.708  | 3.773  | 4.152  | 4.169  | 4.028  | 3.726  | 3.377  | 3.257  | 19763  | RING1   | NM_009066_17_-1 |
| Ralbp1  | 3.581  | 3.948  | 2.312  | 2.210  | 3.121  | 2.664  | 3.157  | 2.867  | 2.493  | 2.555  | 19765  | RALBP1  | NM_009067_17_-1 |
| Ripk1   | 5.422  | 5.323  | 6.249  | 6.154  | 5.457  | 5.452  | 5.981  | 6.039  | 6.813  | 6.857  | 19766  | RIPK1   | NM_009068_13_+1 |
| Rit1    | 5.730  | 5.850  | 5.871  | 5.885  | 5.579  | 5.608  | 5.774  | 5.615  | 5.985  | 5.727  | 19769  | RIT1    | NM_009069_3_+1  |
| Rnps1   | 4.171  | 4.040  | 3.725  | 4.067  | 3.955  | 4.047  | 3.962  | 4.116  | 3.454  | 3.423  | 19826  | RNPS1   | NM_009070_17_+1 |
| Rock1   | 6.999  | 6.931  | 6.910  | 6.696  | 7.039  | 6.940  | 6.983  | 6.785  | 6.556  | 7.112  | 19877  | ROCK1   | NM_009071_18_-1 |
| Rock2   | 5.100  | 5.800  | 5.845  | 6.165  | 5.960  | 6.251  | 5.790  | 6.233  | 6.010  | 6.827  | 19878  | ROCK2   | NM_009072_12_+1 |
| Rom1    | 2.244  | 1.444  | 1.358  | 0.709  | 1.554  | 1.152  | 0.738  | 1.753  | 1.548  | 0.813  | 19881  | ROM1    | NM_009073_19_-1 |
| Mst1r   | -4.981 | -4.981 | -4.981 | -4.981 | -4.484 | -4.743 | -4.974 | -4.974 | 1.126  | -0.537 | 19882  | MST1R   | NM_009074_9_+1  |
| Rpia    | 2.796  | 2.138  | 2.005  | 0.972  | 1.353  | 0.700  | 2.006  | 1.269  | 1.091  | 1.033  | 19895  | RPIA    | NM_009075_6_-1  |
| Rpl12   | 8.140  | 8.167  | 8.320  | 8.347  | 8.069  | 8.120  | 8.340  | 8.221  | 6.300  | 6.252  | 269261 | RPL12   | NM_009076_2_+1  |
| Rpl18   | 9.182  | 8.946  | 9.341  | 9.319  | 9.276  | 9.130  | 9.542  | 9.339  | 8.514  | 8.179  | 19899  | RPL18   | NM_009077_7_+1  |
| Rpl19   | 10.198 | 10.122 | 10.134 | 10.123 | 9.980  | 9.870  | 10.038 | 9.852  | 8.978  | 8.778  | 19921  | RPL19   | NM_009078_11_+1 |
| Rpl22   | 7.106  | 6.928  | 7.757  | 7.696  | 7.578  | 7.475  | 7.782  | 7.436  | 6.349  | 6.225  | 19934  | RPL22   | NM_009079_4_+1  |
| Rpl26   | 6.987  | 7.230  | 6.661  | 6.957  | 6.532  | 6.394  | 6.996  | 6.696  | 5.217  | 5.376  | 19941  | RPL26   | NM_009080_11_+1 |
| Rpl28   | 7.896  | 7.757  | 8.417  | 8.373  | 7.818  | 7.774  | 8.236  | 8.205  | 7.228  | 7.093  | 19943  | RPL28   | NM_009081_7_+1  |
| Rpl29   | 8.424  | 4.899  | 8.114  | 5.094  | 8.193  | 5.066  | 8.319  | 5.056  | 7.317  | 4.141  | 19944  | NA      | NM_009082_9_+1  |
| Rpl30   | 5.313  | 5.441  | 4.755  | 4.565  | 4.427  | 4.467  | 4.701  | 4.372  | 2.852  | 2.323  | 19946  | RPL30   | NM_009083_15_-1 |
| Rpl37a  | 9.846  | 9.523  | 10.233 | 9.981  | 10.264 | 9.780  | 10.551 | 10.029 | 9.466  | 8.972  | 19981  | RPL37A  | NM_009084_1_+1  |
| Polr1c  | 5.583  | 5.185  | 4.924  | 4.767  | 4.610  | 4.447  | 4.746  | 4.315  | 3.939  | 3.529  | 20016  | POLR1C  | NM_009085_17_-1 |
| Polr1b  | 2.346  | 1.466  | 3.377  | 2.578  | 2.853  | 2.351  | 3.299  | 2.812  | 3.375  | 2.833  | 20017  | POLR1B  | NM_009086_2_+1  |
| Polr1d  | 6.442  | 6.482  | 6.263  | 6.223  | 5.582  | 5.648  | 5.908  | 5.881  | 4.852  | 4.907  | 20018  | POLR1D  | NM_009087_5_+1  |
| Polr1a  | 2.452  | 2.599  | 5.877  | 4.833  | 4.552  | 4.185  | 4.228  | 3.738  | 4.146  | 3.317  | 20019  | POLR1A  | NM_009088_6_+1  |
| Polr2c  | 7.151  | 6.923  | 6.344  | 6.258  | 6.426  | 6.242  | 6.326  | 6.248  | 6.110  | 5.902  | 20021  | POLR2C  | NM_009090_8_+1  |
| Rps15   | 8.020  | 8.112  | 8.422  | 8.392  | 8.266  | 8.218  | 8.657  | 8.423  | 7.183  | 6.949  | 20054  | RPS15   | NM_009091_10_+1 |
| Rps17   | 8.642  | 8.679  | 8.813  | 8.862  | 8.294  | 8.522  | 8.652  | 8.724  | 7.547  | 7.593  | 20068  | RPS17   | NM_009092_7_-1  |
| Rps29   | 9.196  | 9.109  | 10.376 | 10.223 | 9.815  | 9.804  | 10.026 | 9.940  | 8.958  | 8.861  | 20090  | RPS29   | NM_009093_12_-1 |
| Rps4x   | 9.482  | 9.510  | 9.515  | 9.526  | 9.190  | 9.184  | 9.346  | 9.335  | 8.332  | 8.195  | 20102  | RPS4Y1  | NM_009094_X_-1  |
| Rps5    | 9.240  | 9.149  | 9.627  | 9.551  | 9.295  | 9.128  | 9.414  | 9.292  | 8.399  | 8.158  | 20103  | RPS5    | NM_009095_7_+1  |
| Rps6    | 9.983  | 8.950  | 10.441 | 10.436 | 10.074 | 9.913  | 10.104 | 9.969  | 9.166  | 8.996  | 20104  | RPS6    | NM_009096_4_-1  |
| Rps6ka1 | 7.306  | 7.447  | 3.443  | 4.083  | 3.992  | 3.511  | 3.687  | 3.684  | 3.961  | 3.940  | 20111  | RPS6KA1 | NM_009097_4_-1  |
| Rps8    | 9.119  | 9.036  | 9.211  | 9.185  | 8.951  | 8.876  | 9.294  | 9.208  | 7.821  | 7.679  | 20116  | RPS8    | NM_009098_4_-1  |
| Trim30a | 8.060  | 7.896  | 7.840  | 7.312  | 6.768  | 5.793  | 7.038  | 6.674  | 7.382  | 7.654  | 20128  | NA      | NM_009099_7_-1  |
| Rras    | 4.904  | 4.819  | 4.835  | 4.836  | 5.066  | 4.981  | 6.570  | 6.663  | 7.377  | 7.295  | 20130  | RRAS    | NM_009101_7_+1  |
| Rrm1    | 5.253  | 4.774  | 5.217  | 5.396  | 5.914  | 5.638  | 5.502  | 5.657  | 4.456  | 4.140  | 20133  | RRM1    | NM_009103_7_+1  |
| Rrm2    | 0.826  | 2.012  | 4.855  | 5.646  | 5.942  | 5.679  | 5.132  | 5.558  | 4.280  | 3.248  | 20135  | RRM2    | NM_009104_12_+1 |
| Rsu1    | 6.851  | 6.891  | 7.155  | 7.173  | 7.178  | 7.142  | 7.189  | 7.181  | 7.508  | 7.431  | 20163  | RSU1    | NM_009105_2_-1  |
| Rtkn    | -4.981 | -4.981 | -4.888 | -4.955 | -4.975 | -4.981 | -4.969 | -4.977 | -4.860 | -4.966 | 20166  | RTKN    | NM_009106_6_+1  |
| Nr1h4   | -2.565 | 1.133  | -4.981 | -4.981 | -4.981 | -4.976 | -4.972 | -4.962 | -4.981 | -4.981 | 20186  | NR1H4   | NM_009108_10_-1 |
| Ryr1    | 4.629  | 4.537  | 4.201  | 4.187  | 4.413  | 4.790  | 4.206  | 3.644  | 2.785  | 2.468  | 20190  | RYR1    | NM_009109_7_-1  |
| S100a10 | 7.342  | 7.329  | 3.993  | 6.238  | 6.039  | 7.022  | 7.050  | 8.094  | 7.955  | 8.622  | 20194  | S100A10 | NM_009112_3_+1  |
| S100a13 | 6.551  | 6.395  | 5.613  | 5.382  | 5.097  | 4.899  | 5.810  | 5.752  | 5.803  | 5.538  | 20196  | S100A13 | NM_009113_3_+1  |
| S100a9  | -4.923 | -1.576 | -2.998 | 3.067  | -1.305 | 5.016  | 1.527  | 6.128  | 7.620  | 0.913  | 20202  | S100A9  | NM_009114_3_-1  |
| S100b   | -3.563 | -4.981 | -4.492 | -3.814 | -4.804 | -4.967 | -4.457 | -4.968 | -4.981 | -4.981 | 20203  | S100B   | NM_009115_10_+1 |
| Sag     | -0.915 | -0.511 | -1.984 | -2.934 | -0.773 | -1.848 | -1.442 | -3.446 | -0.775 | -2.343 | 20215  | SAG     | NM_009118_1_+1  |
| Sap18   | 5.130  | 5.107  | 4.520  | 4.286  | 4.657  | 4.488  | 4.832  | 4.720  | 4.781  | 4.570  | 20220  | SAP18   | NM_009119_14_+1 |
| Sar1a   | 7.045  | 7.103  | 7.248  | 7.355  | 6.972  | 7.137  | 6.974  | 7.175  | 7.110  | 7.199  | 20224  | SAR1A   | NM_009120_10_+1 |
| Sat1    | 8.651  | 8.900  | 10.118 | 9.782  | 10.958 | 10.819 | 10.921 | 10.895 | 10.682 | 10.948 | 20229  | SAT1    | NM_009121_X_-1  |
| Satb1   | 3.412  | 2.924  | 3.527  | 3.761  | 4.850  | 4.650  | 4.030  | 4.013  | -3.529 | 0.776  | 20230  | SATB1   | NM_009122_17_-1 |
| Nlxl-2  | -4.981 | -4.981 | -4.890 | -4.890 | -1.560 | -2.889 | -4.975 | -4.966 | -4.981 | -4.981 | 20231  | NKX1-2  | NM_009123_7_-1  |
| Atxn1   | -4.981 | -3.025 | 0.618  | 1.839  | -3.373 | -1.345 | -2.479 | -1.317 | 0.131  | 0.162  | 20238  | ATXN1   | NM_009124_13_-1 |
| Atxn2   | 4.175  | 4.574  | 4.193  | 4.192  | 4.536  | 4.698  | 4.323  | 4.039  | 4.470  | 4.669  | 20239  | ATXN2   | NM_009125_5_+1  |
| Scd1    | 0.225  | -2.018 | 3.186  | 3.906  | 1.096  | 3.265  | 2.486  | 5.199  | 0.347  | 1.223  | 20249  | SCD     | NM_009127_19_-1 |
| Scd2    | 5.639  | 5.310  | 5.820  | 6.576  | 5.731  | 5.902  | 5.801  | 6.235  | 5.425  | 5.683  | 20250  | NA      | NM_009128_19_+1 |
| Scg3    | -4.981 | -4.981 | -4.981 | -4.981 | -4.772 | -4.880 | -4.967 | -4.934 | -4.981 | -4.981 | 20255  | SCG3    | NM_009130_9_-1  |
| Clec11a | 3.356  | 2.754  | 0.653  | 1.047  | 0.327  | 0.886  | 0.535  | -0.132 | -0.185 | -1.530 | 20256  | CLEC11A | NM_009131_7_-1  |
| Scin    | -4.981 | -4.594 | -0.129 | -2.584 | -0.399 | -2.733 | -2.547 | -4.382 | -4.981 | -4.981 | 20259  | SCIN    | NM_009132_12_-1 |
| Scrg1   | -4.981 | -4.981 | -4.248 | -4.950 | -3.917 | -4.362 | -4.991 | -4.653 | 0.636  | -1.829 | 20284  | SCRG1   | NM_009136_8_+1  |
| Ccl22   | 0.971  | -0.666 | 6.691  | 7.124  | 2.823  | 2.160  | 5.349  | 3.870  | -1.871 | -3.855 | 20299  | CCL22   | NM_009137_8_+1  |
| Ccl25   | 1.581  | 2.186  | 0.183  | 0.461  | 0.326  | -0.864 | -0.351 | -0.032 | -0.201 | 0.505  | 20300  | CCL25   | NM_009138_8_+1  |
| Ccl6    | 5.516  | 5.895  | 6.975  | 6.638  | 5.372  | 5.354  | 9.647  | 9.823  | 11.402 | 10.950 | 20305  | NA      | NM_009139_11_-1 |
| Cxcl2   | -1.818 | -4.981 | 0.112  | 1.001  | 0.443  | 1.421  | 2.647  | 4.340  | 2.993  | 4.881  | 20310  | CXCL3   | NM_009140_5_+1  |
| Cxcl5   | -4.981 | -4.981 | -2.896 | -2.134 | -4.865 | -4.655 | -4.884 | -4.967 | -4.981 | -4.981 | 20311  | CXCL6   | NM_009141_5_+1  |
| Cx3cl1  | -4.981 | -4.981 | 0.934  | -0.017 | -3.138 | -2.108 | 0.338  | -0.484 | -4.981 | -4.981 | 20312  | CX3CL1  | NM_009142_8_+1  |
| Sdf2    | 7.083  | 7.256  | 6.292  | 6.201  | 5.721  | 5.861  | 5.534  | 5.824  | 5.504  | 5.714  | 20316  | SDF2    | NM_009143_11_+1 |

|            |        |        |        |        |        |        |        |        |        |        |       |            |                 |
|------------|--------|--------|--------|--------|--------|--------|--------|--------|--------|--------|-------|------------|-----------------|
| Nptn       | 9.058  | 9.534  | 8.137  | 8.029  | 7.657  | 7.832  | 7.953  | 7.990  | 7.807  | 8.166  | 20320 | NA         | NM_009145_9_+1  |
| Frrs1      | 4.409  | 3.309  | 3.599  | 3.345  | 4.296  | 3.547  | 5.160  | 4.932  | 6.271  | 6.314  | 20321 | FRRS1      | NM_009146_3_+1  |
| Sec23a     | 3.986  | 3.812  | 4.238  | 4.375  | 3.600  | 3.593  | 3.686  | 3.955  | 4.929  | 5.150  | 20334 | SEC23A     | NM_009147_12_-1 |
| Exoc4      | 4.451  | 4.777  | 4.590  | 4.701  | 4.935  | 5.117  | 4.618  | 4.457  | 4.856  | 4.982  | 20336 | EXOC4      | NM_009148_6_+1  |
| Glgl1      | 4.816  | 5.283  | 5.913  | 5.847  | 5.971  | 5.993  | 5.671  | 5.787  | 6.545  | 6.572  | 20340 | GLG1       | NM_009149_8_-1  |
| Selenbp1   | -0.956 | 0.378  | 0.814  | 2.196  | 2.085  | 2.557  | 3.521  | 4.099  | 5.541  | 5.360  | 20341 | SELENBP1   | NM_009150_3_+1  |
| Selpgl     | 10.259 | 10.323 | 9.333  | 9.516  | 8.971  | 8.939  | 9.339  | 9.304  | 9.664  | 9.517  | 20345 | SEPLG      | NM_009151_5_-1  |
| Sema3b     | -4.981 | -0.946 | -4.859 | -3.583 | -4.890 | -0.350 | -4.973 | -3.322 | -4.336 | -4.981 | 20347 | SEMA3B     | NM_009153_9_-1  |
| Sema5a     | -0.001 | 1.802  | -4.978 | -4.978 | -4.504 | -3.285 | -3.575 | -0.847 | -4.190 | -4.981 | 20356 | SEMA5A     | NM_009154_15_+1 |
| Sepp1      | 7.714  | 7.531  | 5.668  | 5.504  | 5.644  | 5.292  | 7.443  | 8.749  | 9.156  | 9.881  | 20363 | SELENOP    | NM_009155_15_+1 |
| Sepw1      | 7.900  | 7.659  | 7.304  | 6.695  | 6.956  | 6.568  | 6.992  | 6.855  | 6.786  | 5.853  | 20364 | SELENOW    | NM_009156_7_-1  |
| Map2k4     | 4.629  | 4.801  | 6.216  | 6.136  | 5.442  | 5.378  | 5.333  | 5.484  | 6.007  | 5.972  | 26398 | MAP2K4     | NM_009157_11_-1 |
| Mapk10     | -3.938 | -3.565 | -4.427 | -3.555 | -4.965 | -4.904 | -4.988 | -3.038 | -4.981 | -4.981 | 26414 | MAPK10     | NM_009158_5_-1  |
| Srsf5      | 7.309  | 7.596  | 6.716  | 6.714  | 6.792  | 7.154  | 6.408  | 6.612  | 6.612  | 6.583  | 20384 | NA         | NM_009159_12_+1 |
| Sgca       | -4.981 | -4.981 | -3.157 | -1.318 | -4.801 | -4.978 | -4.962 | -4.972 | -4.981 | -4.316 | 20391 | SGCA       | NM_009161_11_-1 |
| Scg5       | -4.981 | -4.981 | -4.785 | -3.486 | -4.984 | -2.256 | -4.491 | -0.794 | -4.981 | -3.233 | 20394 | SCG5       | NM_009162_2_-1  |
| Sgpl1      | 5.796  | 5.532  | 7.295  | 7.304  | 7.203  | 7.116  | 7.547  | 7.383  | 7.933  | 8.394  | 20397 | SGPL1      | NM_009163_10_-1 |
| Sh3bp1     | 3.514  | 3.022  | 7.386  | 7.582  | 7.405  | 7.213  | 6.856  | 6.835  | 6.883  | 7.229  | 20401 | SH3BP1     | NM_009164_15_+1 |
| Sorbs1     | 0.371  | -2.223 | -2.761 | -1.284 | -1.003 | -1.108 | 0.495  | -1.947 | -1.129 | -0.935 | 20411 | SORBS1     | NM_009166_19_-1 |
| Shd        | -4.981 | -2.441 | -3.878 | -4.632 | -4.831 | -4.808 | -4.685 | -4.911 | -4.169 | -3.893 | 20420 | SHD        | NM_009168_17_+1 |
| Shfm1      | 8.315  | 8.189  | 8.475  | 8.277  | 8.139  | 8.076  | 8.524  | 8.344  | 8.501  | 8.298  | 20422 | SHFM1      | NM_009169_6_-1  |
| Shmt1      | 0.837  | 0.612  | 1.477  | 2.230  | 2.704  | 2.560  | 1.750  | 2.395  | -0.301 | -1.220 | 20425 | SHMT1      | NM_009171_11_-1 |
| Siah1a     | 4.891  | 4.505  | 4.109  | 3.938  | 4.442  | 4.327  | 4.362  | 4.378  | 4.595  | 4.601  | 20437 | SIAH1      | NM_009172_8_-1  |
| Siah1b     | -4.139 | -3.941 | -1.990 | -0.926 | -1.373 | -1.479 | -4.266 | -4.871 | -4.390 | -4.769 | 20438 | NA         | NM_009173_X_-1  |
| Siah2      | 7.048  | 6.697  | 5.643  | 5.650  | 5.203  | 5.163  | 5.510  | 5.751  | 5.970  | 5.970  | 20439 | SIAH2      | NM_009174_3_-1  |
| St3gal3    | 2.064  | 1.861  | 2.674  | 2.586  | 1.787  | 2.585  | 1.423  | 1.279  | 1.425  | 1.954  | 20441 | ST3GAL3    | NM_009176_4_-1  |
| St3gal1    | 4.905  | 4.936  | 4.742  | 4.535  | 4.497  | 4.620  | 5.077  | 5.126  | 4.991  | 5.538  | 20442 | ST3GAL1    | NM_009177_15_-1 |
| St3gal4    | 6.404  | 6.856  | 6.835  | 7.036  | 7.237  | 7.748  | 7.277  | 7.679  | 7.508  | 8.016  | 20443 | ST3GAL4    | NM_009178_9_+1  |
| St3gal2    | 2.220  | 2.181  | 3.424  | 3.786  | 5.143  | 5.109  | 4.900  | 4.999  | 6.187  | 6.011  | 20444 | ST3GAL2    | NM_009179_8_+1  |
| St6galnac2 | -0.040 | 4.602  | 0.227  | 3.469  | 0.328  | 7.797  | 0.093  | 7.324  | -2.953 | 4.572  | 20446 | ST6GALNAC2 | NM_009180_11_-1 |
| St8sia3    | -4.981 | -4.981 | -4.482 | -4.730 | -1.488 | 1.668  | -4.981 | -4.981 | -4.981 | -4.981 | 20451 | ST8SIA3    | NM_009182_18_+1 |
| St8sia4    | 7.929  | 8.168  | 7.379  | 7.366  | 6.256  | 6.482  | 6.675  | 7.132  | 7.714  | 8.697  | 20452 | ST8SIA4    | NM_009183_1_-1  |
| Ptk6       | -2.647 | -4.685 | -2.407 | -4.965 | 0.643  | 0.131  | -3.731 | -3.649 | -1.173 | -4.981 | 20459 | PTK6       | NM_009184_2_-1  |
| Stil       | -4.981 | -4.873 | -0.597 | -1.318 | 0.988  | -1.692 | 0.304  | 0.848  | 0.273  | -1.103 | 20460 | STIL       | NM_009185_4_+1  |
| Tra2b      | 7.657  | 7.920  | 7.777  | 7.854  | 7.780  | 7.699  | 7.451  | 7.533  | 6.751  | 7.192  | 20462 | TRA2B      | NM_009186_16_-1 |
| Cox7a2l    | 7.765  | 7.241  | 8.075  | 7.674  | 7.885  | 7.580  | 7.811  | 7.187  | 7.236  | 6.777  | 20463 | COX7A2L    | NM_009187_17_-1 |
| Sin3b      | 2.901  | 2.742  | 3.647  | 3.672  | 3.707  | 3.614  | 3.605  | 3.308  | 4.164  | 4.185  | 20467 | SIN3B      | NM_009188_8_+1  |
| Six1       | -4.981 | -4.981 | -4.976 | -4.426 | -2.611 | -4.512 | -4.275 | -4.877 | -4.981 | -3.758 | 20471 | SIX1       | NM_009189_12_-1 |
| Vps4b      | 6.693  | 6.831  | 6.921  | 6.916  | 6.986  | 7.081  | 7.094  | 7.020  | 7.027  | 7.242  | 20479 | VPS4B      | NM_009190_1_-1  |
| Clpb       | 4.856  | 4.856  | 3.573  | 4.083  | 4.744  | 4.903  | 3.928  | 4.296  | 3.499  | 3.747  | 20480 | CLPB       | NM_009191_7_+1  |
| Sla        | 6.432  | 6.206  | 7.741  | 7.790  | 8.344  | 8.308  | 7.975  | 8.181  | 8.929  | 8.870  | 20491 | SLA        | NM_009192_15_-1 |
| Slbp       | 6.505  | 6.951  | 6.634  | 6.758  | 7.132  | 6.981  | 6.882  | 6.933  | 6.025  | 6.315  | 20492 | SLBP       | NM_009193_5_-1  |
| Slc12a2    | 1.576  | 1.158  | 4.904  | 4.678  | 6.875  | 6.616  | 6.420  | 6.928  | 4.525  | 6.085  | 20496 | SLC12A2    | NM_009194_18_+1 |
| Slc12a4    | 3.071  | 3.137  | 1.820  | 1.608  | 2.298  | 2.110  | 2.560  | 2.984  | 4.309  | 4.421  | 20498 | SLC12A4    | NM_009195_8_-1  |
| Slc16a1    | -0.342 | 1.224  | 2.664  | 3.677  | 0.775  | 2.941  | 2.066  | 3.865  | 1.930  | 2.141  | 20501 | SLC16A1    | NM_009196_3_+1  |
| Slc16a2    | -4.981 | -4.981 | 1.146  | 1.484  | -2.925 | -3.846 | -3.689 | -1.641 | -4.981 | -4.981 | 20502 | SLC16A2    | NM_009197_X_-1  |
| Slc1a1     | -4.981 | -4.981 | -4.936 | -4.936 | -4.412 | -2.894 | -3.181 | -3.189 | -4.981 | -4.981 | 20510 | SLC1A1     | NM_009199_19_+1 |
| Slc1a5     | 5.746  | 4.587  | 7.061  | 5.848  | 6.673  | 5.415  | 6.575  | 5.789  | 6.582  | 5.354  | 20514 | SLC1A5     | NM_009201_7_+1  |
| Slc22a12   | 3.252  | 3.244  | -4.966 | -4.966 | -4.960 | -4.933 | -4.978 | -4.941 | -4.981 | -4.981 | 20521 | SLC22A12   | NM_009203_19_-1 |
| Slc2a4     | -4.981 | -2.583 | -3.387 | -2.119 | -3.418 | -1.154 | -2.869 | -1.154 | -4.981 | -2.207 | 20528 | SLC2A4     | NM_009204_11_-1 |
| Slc3a1     | -4.981 | -4.981 | -2.775 | -3.020 | -4.011 | -2.991 | -4.704 | -4.861 | -4.981 | -4.981 | 20532 | SLC3A1     | NM_009205_17_+1 |
| Slc4a1ap   | 4.287  | 4.490  | 4.746  | 4.736  | 5.173  | 5.188  | 4.817  | 4.738  | 4.292  | 4.256  | 20534 | SLC4A1AP   | NM_009206_5_+1  |
| Slc4a2     | 1.930  | 1.733  | 2.361  | 1.496  | 2.109  | 1.858  | 1.275  | 0.783  | 1.538  | 2.682  | 20535 | SLC4A2     | NM_009207_5_+1  |
| Slc4a3     | -3.189 | -0.154 | -4.834 | -2.058 | -3.491 | -2.484 | -3.047 | -2.439 | -3.109 | -1.845 | 20536 | SLC4A3     | NM_009208_1_+1  |
| Slc6a2     | -3.563 | -4.981 | -4.062 | -4.402 | -4.291 | -4.819 | -4.099 | -4.766 | -4.190 | -4.981 | 20538 | SLC6A2     | NM_009209_8_+1  |
| Hltf       | 3.979  | 4.089  | 5.797  | 5.639  | 5.430  | 5.912  | 5.764  | 5.921  | 5.596  | 6.469  | 20585 | HLTF       | NM_009210_3_+1  |
| Smarcc1    | 4.593  | 4.552  | 5.741  | 5.735  | 5.217  | 5.155  | 4.715  | 5.148  | 4.715  | 4.989  | 20588 | SMARCC1    | NM_009211_9_+1  |
| Ighmbp2    | 2.867  | 2.863  | 2.843  | 2.700  | 2.913  | 3.030  | 3.113  | 2.659  | 2.959  | 2.760  | 20589 | IGHMBP2    | NM_009212_19_-1 |
| Smpd2      | 3.991  | 4.075  | 3.403  | 3.228  | 4.510  | 4.500  | 4.572  | 4.486  | 4.837  | 4.437  | 20598 | SMPD2      | NM_009213_10_-1 |
| Sms        | 7.746  | 8.097  | 6.002  | 6.063  | 6.118  | 6.029  | 5.643  | 5.448  | 4.302  | 4.270  | 20603 | SMS        | NM_009214_X_-1  |
| Sstr2      | -3.075 | -1.724 | -4.374 | -4.956 | -4.976 | -4.976 | -4.977 | -4.327 | -4.981 | -4.981 | 20606 | SSTR2      | NM_009217_11_+1 |
| Sstr4      | -4.981 | -4.981 | -1.834 | -1.748 | -4.287 | -4.003 | -0.774 | -2.350 | 0.386  | -0.364 | 20608 | SSTR4      | NM_009219_2_+1  |
| Snca       | 0.212  | 2.150  | -0.031 | 1.662  | -0.487 | 1.201  | -1.678 | 0.446  | -1.739 | 0.585  | 20617 | SNCA       | NM_009221_6_-1  |
| Snap23     | 5.486  | 4.669  | 6.912  | 6.691  | 6.106  | 5.511  | 6.460  | 6.332  | 6.659  | 6.970  | 20619 | SNAP23     | NM_009222_2_+1  |
| Snn        | 5.120  | 4.915  | 3.689  | 3.839  | 3.907  | 4.388  | 2.532  | 2.850  | -0.978 | -0.722 | 20621 | SNN        | NM_009223_16_+1 |
| Snrnp70    | 6.089  | 5.960  | 6.015  | 6.175  | 6.396  | 6.350  | 5.913  | 5.756  | 4.858  | 4.505  | 20637 | SNRNP70    | NM_009224_7_-1  |
| Snrpb      | 9.056  | 9.067  | 8.474  | 8.526  | 8.766  | 8.664  | 8.582  | 8.722  | 8.760  | 8.444  | 20638 | SNRBP      | NM_009225_2_-1  |
| Snrpd1     | 6.840  | 6.794  | 6.631  | 6.625  | 6.722  | 6.597  | 6.677  | 6.257  | 4.552  | 4.427  | 20641 | SNRPD1     | NM_009226_18_+1 |
| Snrpe      | 7.527  | 7.308  | 7.417  | 7.359  | 7.219  | 7.048  | 7.520  | 7.148  | 5.889  | 6.046  | 20643 | NA         | NM_009227_1_-1  |
| Snta1      | -0.405 | -1.218 | -0.476 | -0.451 | 1.950  | 2.755  | 2.676  | 2.914  | 2.109  | 2.761  | 20648 | SNTA1      | NM_009228_2_-1  |
| Sntb2      | 0.609  | 1.028  | 2.417  | 2.818  | 3.131  | 2.849  | 2.802  | 2.713  | 3.703  | 3.085  | 20650 | SNTB2      | NM_009229_8_+1  |
| Soat1      | 3.728  | 3.302  | 6.150  | 6.069  | 5.693  | 6.318  | 6.205  | 6.559  | 7.486  | 8.203  | 20652 | SOAT1      | NM_009230_1_-1  |
| Sos1       | 3.395  | 3.825  | 3.896  | 3.603  | 4.002  | 3.863  | 4.204  | 3.890  | 4.142  | 4.354  | 20662 | SOS1       | NM_009231_17_-1 |
| Sox15      | -2.378 | -1.343 | -2.979 | -2.946 | -1.433 | -2.551 | -0.243 | -1.909 | -1.773 | -1.619 | 20670 | SOX15      | NM_009235_11_+1 |

|           |        |        |        |        |        |        |        |        |        |        |        |          |                 |
|-----------|--------|--------|--------|--------|--------|--------|--------|--------|--------|--------|--------|----------|-----------------|
| Sox18     | -2.454 | -4.981 | -4.918 | -2.357 | -4.971 | -2.739 | -4.187 | -2.264 | -3.109 | -4.981 | 20672  | SOX18    | NM_009236_2_-1  |
| Sox4      | 3.277  | 2.370  | 4.105  | 3.098  | 4.052  | 3.511  | 3.093  | 2.129  | -0.026 | -0.439 | 20677  | SOX4     | NM_009238_13_-1 |
| Sp4       | 3.123  | 3.247  | 1.831  | 1.785  | 3.409  | 3.322  | 3.363  | 2.538  | 2.915  | 2.941  | 20688  | SP4      | NM_009239_12_-1 |
| Sparc     | 1.457  | -0.197 | -2.890 | 0.885  | -3.862 | 1.702  | -2.579 | 2.680  | -2.768 | -1.733 | 20692  | SPARC    | NM_009242_11_-1 |
| Serpina1a | -4.981 | -4.981 | -4.327 | -4.952 | -4.695 | -4.629 | -4.963 | -4.949 | -4.035 | -4.981 | 20700  | SERPINA1 | NM_009243_12_-1 |
| Serpina1b | -4.981 | -1.972 | -4.954 | -3.823 | -4.962 | -4.135 | -4.893 | -4.368 | -4.981 | -4.981 | 20701  | SERPINA1 | NM_009244_12_-1 |
| Serpina1c | -4.981 | -4.981 | -4.963 | -4.417 | -4.952 | -4.951 | -4.954 | -4.931 | -4.981 | -4.981 | 20702  | SERPINA1 | NM_009245_12_-1 |
| Serpini1  | 5.164  | 4.694  | 0.914  | 1.417  | 3.960  | 4.659  | 1.752  | 3.126  | 0.492  | 1.101  | 20713  | SERPINI1 | NM_009250_3_+1  |
| Serpina3g | 5.457  | 2.980  | 8.496  | 8.912  | 9.133  | 8.874  | 8.022  | 7.607  | 3.204  | 3.359  | 20715  | NA       | NM_009251_12_+1 |
| Serpina3n | -1.608 | -4.981 | -2.903 | -2.366 | -3.135 | -3.645 | -4.327 | -3.561 | -4.981 | -4.981 | 20716  | SERPINA3 | NM_009252_12_+1 |
| Serpinb6a | 2.921  | 1.564  | 1.661  | 2.479  | 2.297  | 2.505  | 2.987  | 3.011  | 0.992  | 0.137  | 20719  | SERPINB6 | NM_009254_13_-1 |
| Serpine2  | -4.981 | -4.981 | 1.464  | 1.074  | -2.477 | -1.969 | -0.375 | 0.977  | -0.259 | -1.525 | 20720  | SERPINE2 | NM_009255_1_-1  |
| Serpinb9  | 4.107  | 3.074  | 8.236  | 8.499  | 4.897  | 5.401  | 4.481  | 4.482  | 1.164  | 2.045  | 20723  | SERPINB9 | NM_009256_13_+1 |
| Spn       | 6.003  | 5.576  | 2.989  | 2.814  | 3.299  | 3.167  | 6.204  | 6.017  | 6.105  | 5.448  | 20737  | SPN      | NM_009259_7_-1  |
| Sptbn1    | 1.617  | 1.801  | 2.574  | 2.509  | 0.831  | 0.950  | 1.868  | 2.597  | 3.059  | 3.314  | 20742  | SPTBN1   | NM_009260_11_-1 |
| Strbp     | 5.666  | 6.030  | 7.084  | 6.810  | 6.091  | 6.457  | 5.126  | 5.710  | 3.483  | 4.475  | 20744  | STRBP    | NM_009261_2_-1  |
| Spock1    | -4.981 | -4.981 | -4.576 | -4.393 | -4.981 | -4.981 | -4.978 | -4.939 | -4.981 | -4.981 | 20745  | SPOCK1   | NM_009262_13_-1 |
| Spp1      | -0.457 | 1.949  | 4.187  | 4.094  | 2.231  | 1.801  | 2.667  | 2.704  | -0.108 | -0.085 | 20750  | SPP1     | NM_009263_5_+1  |
| Sephs2    | 5.121  | 5.254  | 4.965  | 5.256  | 4.842  | 5.180  | 5.577  | 5.902  | 7.303  | 7.236  | 20768  | SERPHS2  | NM_009266_7_-1  |
| Sptlc1    | 5.492  | 5.703  | 5.400  | 5.378  | 5.065  | 5.221  | 5.058  | 5.263  | 5.618  | 5.509  | 268656 | SPTLC1   | NM_009269_13_-1 |
| Sqle      | 6.427  | 6.655  | 5.001  | 3.872  | 3.329  | 3.607  | 4.030  | 4.636  | 4.124  | 4.954  | 20775  | SQLE     | NM_009270_15_+1 |
| Src       | -0.002 | -0.560 | -0.249 | -2.316 | -2.771 | -3.979 | -3.592 | -3.514 | -2.918 | -4.182 | 20779  | SRC      | NM_009271_2_+1  |
| Srm       | 6.149  | 6.018  | 5.239  | 5.624  | 5.210  | 5.497  | 4.898  | 5.671  | 3.917  | 3.916  | 20810  | SRM      | NM_009272_4_+1  |
| Srp14     | 8.583  | 8.589  | 7.811  | 7.722  | 7.682  | 7.692  | 7.760  | 7.530  | 6.790  | 6.809  | 20813  | SRP14    | NM_009273_2_-1  |
| SrpK2     | 5.475  | 6.295  | 4.537  | 5.330  | 5.370  | 6.088  | 4.589  | 4.759  | 3.831  | 4.170  | 20817  | SRPK2    | NM_009274_5_-1  |
| Srprb     | 6.187  | 6.383  | 5.024  | 5.195  | 5.038  | 5.243  | 5.115  | 5.309  | 5.078  | 5.019  | 20818  | SRPRB    | NM_009275_9_-1  |
| Trim21    | 4.291  | 3.577  | 4.904  | 4.993  | 4.759  | 4.098  | 4.311  | 3.990  | 4.600  | 4.797  | 20821  | TRIM21   | NM_009277_7_-1  |
| Ssb       | 2.653  | 3.050  | 2.260  | 2.995  | 1.723  | 2.542  | 1.316  | 2.240  | 0.974  | 1.712  | 20823  | SSB      | NM_009278_2_+1  |
| Ssr4      | 7.095  | 6.894  | 6.142  | 6.129  | 5.324  | 5.521  | 5.841  | 6.399  | 5.176  | 5.128  | 20832  | SSR4     | NM_009279_X_+1  |
| Ss18      | 4.260  | 4.196  | 3.883  | 4.345  | 4.213  | 4.575  | 3.764  | 4.266  | 3.444  | 4.226  | 268996 | SS18     | NM_009280_18_-1 |
| Zfp143    | 3.890  | 4.116  | 3.976  | 4.181  | 4.237  | 4.221  | 4.231  | 4.482  | 4.937  | 4.872  | 20841  | ZNF143   | NM_009281_7_+1  |
| Stag1     | 5.029  | 4.930  | 5.143  | 5.130  | 5.580  | 5.533  | 5.618  | 5.483  | 5.415  | 5.938  | 20842  | STAG1    | NM_009282_9_+1  |
| Stat1     | 7.617  | 7.636  | 7.775  | 7.523  | 7.699  | 7.075  | 7.774  | 7.613  | 8.043  | 7.823  | 20846  | STAT1    | NM_009283_1_+1  |
| Stat6     | 5.846  | 5.961  | 6.911  | 6.998  | 7.212  | 7.200  | 7.443  | 7.578  | 8.782  | 8.813  | 20852  | STAT6    | NM_009284_10_+1 |
| Stc1      | -4.981 | -4.981 | -4.596 | -4.124 | -4.935 | -1.718 | -4.290 | -3.183 | -4.981 | -4.981 | 20855  | STC1     | NM_009285_14_+1 |
| Stim1     | 3.302  | 2.806  | 3.296  | 3.597  | 3.650  | 3.851  | 3.497  | 3.826  | 5.074  | 4.945  | 20866  | STIM1    | NM_009287_7_+1  |
| Stk10     | 3.892  | 4.271  | 5.212  | 5.282  | 6.225  | 6.222  | 7.297  | 7.409  | 9.058  | 8.835  | 20868  | STK10    | NM_009288_11_+1 |
| Slk       | 0.469  | 0.284  | 0.085  | -1.008 | -0.967 | -0.625 | -0.153 | -0.679 | 0.403  | 0.586  | 20874  | SLK      | NM_009289_19_+1 |
| Stra8     | 1.740  | 1.176  | -1.274 | -1.475 | -4.142 | -3.949 | -1.990 | -3.654 | -4.394 | -4.227 | 20899  | STRA8    | NM_009292_6_+1  |
| Stx4a     | 6.335  | 6.351  | 5.818  | 5.632  | 5.526  | 5.513  | 5.435  | 5.632  | 5.112  | 5.330  | 20909  | STX4     | NM_009294_7_+1  |
| Stxbp1    | 1.486  | 1.447  | 1.708  | 1.509  | -0.008 | 0.791  | 0.768  | 1.379  | -0.395 | 0.377  | 20910  | STXBP1   | NM_009295_2_-1  |
| Supt4a    | 7.596  | 7.426  | 7.290  | 7.207  | 7.770  | 7.615  | 7.778  | 7.395  | 6.720  | 6.718  | 20922  | SUPT4H1  | NM_009296_11_+1 |
| Supt6     | 4.747  | 4.799  | 5.552  | 5.629  | 5.789  | 5.919  | 5.468  | 5.171  | 5.292  | 4.998  | 20926  | SUPT6H   | NM_009297_11_-1 |
| Surf6     | 3.401  | 3.660  | 3.734  | 3.926  | 4.104  | 3.956  | 4.205  | 4.139  | 4.275  | 4.050  | 20935  | SURF6    | NM_009298_2_-1  |
| Swap70    | 5.053  | 4.380  | 7.156  | 7.088  | 7.538  | 7.169  | 7.074  | 6.865  | 5.897  | 6.298  | 20947  | SWAP70   | NM_009302_7_+1  |
| SyngR1    | -1.038 | -4.981 | -4.992 | -1.367 | -3.124 | 0.150  | -3.267 | -0.307 | -1.863 | -2.480 | 20972  | SYNGR1   | NM_009303_15_+1 |
| SyngR2    | 10.662 | 10.704 | 9.940  | 10.009 | 10.348 | 10.209 | 10.375 | 10.242 | 8.960  | 9.104  | 20973  | SYNGR2   | NM_009304_11_+1 |
| Syp       | 0.542  | -0.311 | -1.678 | -0.913 | -1.053 | -0.430 | -1.060 | -0.005 | 0.304  | 1.597  | 20977  | SYP      | NM_009305_X_+1  |
| Syt1      | -4.981 | -2.736 | -4.911 | -4.911 | -4.816 | -3.655 | -4.943 | -4.917 | -4.981 | -4.981 | 20979  | SYT1     | NM_009306_10_-1 |
| Tac2      | -4.981 | -1.814 | -4.876 | 0.795  | -4.993 | 1.450  | -3.543 | 0.946  | -3.925 | -1.822 | 21334  | TAC3     | NM_009312_10_+1 |
| Taf6      | 4.496  | 4.758  | 4.372  | 4.633  | 4.777  | 4.909  | 4.756  | 4.949  | 4.838  | 4.957  | 21343  | TAf6     | NM_009315_5_-1  |
| Map3k7    | 2.812  | 3.926  | 2.995  | 4.589  | 3.587  | 3.918  | 3.002  | 4.208  | 3.641  | 4.936  | 26409  | NA       | NM_009316_4_+1  |
| Tal2      | -2.647 | -0.988 | -4.325 | -4.355 | -4.938 | -4.938 | -4.928 | -3.667 | -1.535 | -2.152 | 21350  | TAL2     | NM_009317_4_+1  |
| Tapbp     | 7.917  | 7.780  | 7.766  | 8.156  | 7.393  | 7.570  | 7.516  | 7.770  | 8.252  | 7.918  | 21356  | TAPBP    | NM_009318_17_+1 |
| Tarbp2    | 4.854  | 4.982  | 4.909  | 4.937  | 4.987  | 4.947  | 4.499  | 4.469  | 3.776  | 3.651  | 21357  | TARBP2   | NM_009319_15_+1 |
| Slc6a6    | 6.024  | 5.927  | 6.795  | 6.680  | 7.051  | 6.905  | 6.713  | 6.495  | 6.904  | 7.026  | 21366  | SLC6A6   | NM_009320_6_+1  |
| Tbca      | 7.085  | 6.948  | 7.583  | 7.420  | 6.403  | 6.416  | 6.543  | 6.181  | 4.898  | 5.006  | 21371  | TBCA     | NM_009321_13_+1 |
| Tbx2      | -2.073 | -1.736 | -3.485 | -4.820 | -4.585 | -3.872 | -3.926 | -4.762 | -1.459 | -3.210 | 21385  | TBX2     | NM_009324_11_+1 |
| Tbxa2r    | 4.150  | 4.428  | -4.741 | -2.441 | -3.369 | -2.798 | -4.854 | -1.107 | -4.671 | -4.946 | 21390  | TBXA2R   | NM_009325_10_+1 |
| Tcea2     | 3.244  | 2.969  | 2.984  | 2.848  | 3.007  | 2.757  | 2.955  | 2.419  | 2.154  | 1.614  | 21400  | TCEA2    | NM_009326_2_+1  |
| Hnf1a     | -3.090 | -3.315 | -4.117 | -4.979 | -1.175 | -3.031 | -3.791 | -4.919 | -3.153 | -3.480 | 21405  | HNF1A    | NM_009327_5_-1  |
| Tcf15     | -4.981 | -4.981 | -4.935 | -3.164 | -4.909 | -2.904 | -4.969 | -2.161 | -4.981 | -4.227 | 21407  | TCF15    | NM_009328_2_+1  |
| Hnf1b     | -4.981 | -4.981 | -4.933 | -4.933 | -2.632 | -3.525 | -3.615 | -4.744 | -4.981 | -4.981 | 21410  | HNF1B    | NM_009330_11_+1 |
| Tcf7      | -0.430 | -0.332 | 2.051  | 1.996  | 5.716  | 4.548  | 2.076  | 3.279  | 0.279  | 0.866  | 21414  | NA       | NM_009331_11_-1 |
| Tcf7l1    | -4.981 | -4.981 | 0.072  | -1.223 | 2.392  | 1.070  | 0.068  | -2.262 | -4.005 | -3.979 | 21415  | TCF7L1   | NM_009332_6_-1  |
| Tcf7l2    | 3.060  | 2.053  | 0.939  | 0.403  | 1.895  | 0.164  | 0.620  | 1.225  | 1.336  | 0.607  | 21416  | TCF7L2   | NM_009333_19_+1 |
| Vps72     | 6.168  | 6.133  | 5.588  | 5.708  | 5.958  | 5.903  | 5.813  | 5.650  | 5.222  | 5.204  | 21427  | VPS72    | NM_009336_3_+1  |
| Acat2     | 5.764  | 6.502  | 3.481  | 3.855  | 4.179  | 4.498  | 3.908  | 4.633  | 3.509  | 4.116  | 110460 | ACAT2    | NM_009338_17_-1 |
| Tcp10b    | -4.981 | -4.981 | -4.636 | -2.860 | -4.223 | -4.875 | -4.775 | -4.675 | -3.738 | -4.532 | 21462  | NA       | NM_009341_17_+1 |
| Dynlt1b   | 8.437  | 8.300  | 8.747  | 8.579  | 6.866  | 7.102  | 7.244  | 7.720  | 7.153  | 7.276  | 21648  | DYNLT1   | NM_009342_17_+1 |
| Phf1      | 2.865  | 3.240  | 1.519  | 2.457  | 2.259  | 2.832  | 2.733  | 2.792  | 2.932  | 3.078  | 21652  | PHF1     | NM_009343_17_+1 |
| Phlda1    | -1.427 | -0.185 | 0.552  | 0.413  | -0.397 | -1.171 | 1.500  | 1.848  | 2.789  | 2.956  | 21664  | PHLDA1   | NM_009344_10_+1 |
| Dntt      | 5.481  | 3.956  | -4.487 | -4.665 | -4.971 | -4.794 | -4.560 | -4.866 | -4.832 | -4.981 | 21673  | DNTT     | NM_009345_19_+1 |
| Tep1      | 6.578  | 4.591  | 6.171  | 5.609  | 6.726  | 6.306  | 6.947  | 6.149  | 7.239  | 6.084  | 21745  | TEP1     | NM_009351_14_-1 |

|           |        |        |        |        |        |        |        |        |        |        |       |           |                 |
|-----------|--------|--------|--------|--------|--------|--------|--------|--------|--------|--------|-------|-----------|-----------------|
| Terf1     | 4.949  | 5.377  | 4.360  | 4.323  | 4.611  | 4.530  | 4.623  | 4.285  | 3.556  | 3.969  | 21749 | TERF1     | NM_009352_1_+1  |
| Terf2     | 4.315  | 4.057  | 3.794  | 3.554  | 3.891  | 3.820  | 3.804  | 3.330  | 3.309  | 3.290  | 21750 | TERF2     | NM_009353_8_-1  |
| Tert      | -2.842 | -2.124 | -3.202 | -2.816 | -1.988 | -2.235 | -4.112 | -2.817 | -4.981 | -4.227 | 21752 | TERT      | NM_009354_13_+1 |
| Prss39    | -4.981 | -4.981 | -4.191 | -2.574 | -3.964 | -4.599 | -3.863 | -4.781 | -3.242 | -4.981 | 21755 | NA        | NM_009355_1_+1  |
| Tex261    | 6.267  | 5.316  | 6.031  | 5.455  | 5.680  | 4.840  | 5.861  | 5.251  | 6.501  | 5.440  | 21766 | TEX261    | NM_009357_6_-1  |
| Ppp2r5d   | 4.618  | 4.899  | 5.155  | 5.252  | 5.751  | 5.787  | 5.438  | 5.598  | 5.539  | 5.781  | 21770 | PPP2R5D   | NM_009358_17_-1 |
| Tex9      | 3.460  | 4.119  | 4.657  | 4.144  | 4.521  | 5.510  | 3.439  | 3.548  | 1.107  | 0.699  | 21778 | TEX9      | NM_009359_9_-1  |
| Tfam      | 5.841  | 5.848  | 5.212  | 5.122  | 5.676  | 5.467  | 5.382  | 5.262  | 4.922  | 5.129  | 21780 | TFAM      | NM_009360_10_-1 |
| Tfdp1     | 1.547  | 1.481  | 3.024  | 3.808  | 2.934  | 3.128  | 2.185  | 3.490  | 4.270  | 4.197  | 21781 | TFDP1     | NM_009361_8_+1  |
| Tff1      | -4.981 | -4.981 | -4.935 | -4.935 | -4.929 | -4.929 | -4.951 | -3.840 | -4.981 | -4.981 | 21784 | TFF1      | NM_009362_17_-1 |
| Tfpi2     | -4.981 | -4.981 | -4.981 | -4.981 | -4.973 | -4.973 | -4.977 | -2.816 | -1.736 | -2.438 | 21789 | TFPI2     | NM_009364_6_-1  |
| Tsc22d1   | 9.322  | 9.274  | 2.850  | 3.017  | 4.095  | 4.700  | 3.499  | 3.582  | 2.740  | 3.578  | 21807 | TSC22D1   | NM_009366_14_+1 |
| Tgfb2     | -4.981 | -1.051 | -1.353 | -2.959 | -2.286 | -3.611 | -2.924 | -1.878 | -2.953 | 1.111  | 21808 | TGFB2     | NM_009367_1_-1  |
| Tgfb3     | -1.933 | -0.578 | -0.317 | 0.458  | -3.277 | -4.618 | -3.079 | -1.197 | -4.981 | -4.981 | 21809 | TGFB3     | NM_009368_12_-1 |
| Tgfb1     | 2.571  | 1.235  | 7.970  | 7.538  | 7.619  | 7.670  | 8.613  | 9.081  | 10.258 | 10.244 | 21810 | TGFB1     | NM_009369_13_+1 |
| Tgfb1r1   | 6.767  | 6.817  | 5.020  | 5.120  | 5.359  | 6.367  | 6.363  | 6.799  | 6.803  | 7.855  | 21812 | TGFB1R1   | NM_009370_4_+1  |
| Tgfb1r2   | 5.063  | 3.812  | 4.405  | 4.238  | 4.833  | 4.240  | 5.161  | 5.827  | 6.526  | 6.366  | 21813 | TGFB1R2   | NM_009371_9_-1  |
| Tgif1     | 3.880  | 2.920  | 5.374  | 5.440  | 5.497  | 5.611  | 5.674  | 5.809  | 5.262  | 5.299  | 21815 | TGIF1     | NM_009372_17_-1 |
| Tgm2      | 1.980  | 0.547  | 2.027  | 3.781  | 8.396  | 8.481  | 7.573  | 6.822  | 4.461  | 3.773  | 21817 | TGM2      | NM_009373_2_-1  |
| Tgm3      | -4.981 | -4.981 | -4.980 | -4.547 | -4.508 | -4.545 | -1.028 | -1.085 | 1.738  | 1.155  | 21818 | TGM3      | NM_009374_2_+1  |
| Tg        | 2.081  | 1.891  | 1.606  | 1.340  | 1.255  | 0.844  | 0.553  | 0.575  | 1.202  | -0.130 | 21819 | TG        | NM_009375_15_+1 |
| Ift88     | 2.640  | 2.714  | 1.345  | 1.208  | 1.823  | 1.780  | 1.569  | 1.516  | 0.888  | 1.482  | 21821 | IFT88     | NM_009376_14_+1 |
| Thbd      | -0.155 | 0.589  | -0.970 | -0.529 | -1.435 | -1.821 | 4.237  | 4.551  | 7.237  | 7.246  | 21824 | THBD      | NM_009378_2_-1  |
| Thrb      | -4.127 | -4.981 | -4.771 | -4.810 | -4.605 | -4.049 | -4.486 | -4.881 | -4.981 | -3.868 | 21834 | THRB      | NM_009380_14_+1 |
| Thrsp     | -4.981 | -4.981 | -4.911 | -1.941 | -4.782 | -4.824 | -4.964 | -4.980 | -4.981 | -4.981 | 21835 | THRSP     | NM_009381_7_-1  |
| Thy1      | 0.938  | 3.578  | -4.556 | -2.139 | -1.917 | -0.051 | -1.160 | 0.294  | -2.601 | -1.890 | 21838 | THY1      | NM_009382_9_+1  |
| Tial1     | 4.917  | 4.733  | 4.187  | 4.079  | 4.421  | 4.131  | 4.457  | 4.263  | 3.900  | 3.807  | 21843 | TIAL1     | NM_009383_7_-1  |
| Tiam1     | -4.230 | -3.652 | 3.842  | 3.375  | 0.337  | 0.555  | 2.943  | 3.722  | 5.261  | 4.861  | 21844 | TIAM1     | NM_009384_16_-1 |
| Nkx2-1    | -4.981 | -4.981 | -4.981 | -4.981 | -4.981 | -4.981 | -4.981 | -4.981 | -4.981 | -4.981 | 21869 | NKX2-1    | NM_009385_12_-1 |
| Tjp1      | -4.981 | -3.643 | -4.940 | -4.716 | -4.941 | -4.937 | -4.598 | -4.910 | -4.981 | -4.981 | 21872 | TJP1      | NM_009386_7_-1  |
| Tk1       | 3.213  | 2.020  | 4.306  | 4.643  | 5.278  | 5.000  | 4.665  | 4.449  | 2.455  | 1.631  | 21877 | TK1       | NM_009387_11_-1 |
| Tkt       | 7.344  | 7.052  | 7.737  | 7.244  | 7.925  | 7.341  | 8.163  | 7.923  | 9.063  | 8.236  | 21881 | TKT       | NM_009388_14_+1 |
| Tle3      | 2.177  | 2.532  | 2.587  | 2.503  | 2.437  | 2.422  | 1.354  | 0.592  | 3.209  | 3.052  | 21887 | TLE3      | NM_009389_9_+1  |
| Ran       | 8.270  | 8.337  | 8.390  | 8.792  | 8.541  | 8.504  | 8.083  | 8.308  | 6.813  | 6.903  | 19384 | RAN       | NM_009391_5_+1  |
| Tlx2      | -4.981 | -4.981 | -4.387 | -2.268 | -3.803 | -4.260 | -4.914 | -4.965 | -4.981 | -4.981 | 21909 | TLX2      | NM_009392_6_-1  |
| Tnnc1     | -4.981 | -4.981 | -3.136 | -4.749 | -4.660 | -4.364 | -3.813 | -4.884 | -4.981 | -3.386 | 21924 | TNNC1     | NM_009393_14_+1 |
| Tnnc2     | -4.981 | -4.981 | 0.449  | 0.239  | -0.815 | -0.411 | -2.302 | -4.172 | -2.166 | -3.461 | 21925 | TNNC2     | NM_009394_2_-1  |
| Tnfaip1   | 3.181  | 2.625  | 3.763  | 3.850  | 2.805  | 3.159  | 1.272  | 2.877  | 3.583  | 3.872  | 21927 | TNFAIP1   | NM_009395_11_-1 |
| Tnfaip2   | 1.641  | 1.398  | 5.343  | 6.123  | 4.264  | 4.879  | 5.538  | 6.608  | 8.580  | 8.478  | 21928 | TNFAIP2   | NM_009396_12_+1 |
| Tnfaip3   | 6.283  | 6.112  | 5.162  | 5.304  | 6.072  | 6.226  | 6.451  | 6.345  | 5.857  | 6.511  | 21929 | TNFAIP3   | NM_009397_10_-1 |
| Tnfaip6   | -4.981 | -2.895 | -4.981 | -4.981 | -4.930 | -4.210 | -2.243 | -3.671 | 0.053  | -2.923 | 21930 | TNFAIP6   | NM_009398_2_+1  |
| Tnfrsf11a | 1.788  | 2.112  | 4.893  | 4.787  | 5.301  | 5.402  | 4.759  | 4.874  | 4.476  | 4.914  | 21934 | TNFRSF11A | NM_009399_1_+1  |
| Tnfrsf18  | 5.768  | 6.842  | 4.974  | 5.484  | 5.631  | 6.280  | 5.166  | 5.380  | 0.926  | 1.702  | 21936 | TNFRSF18  | NM_009400_4_+1  |
| Tnfrsf8   | -4.981 | -4.981 | -4.989 | -3.374 | -4.971 | -4.831 | -3.276 | -3.088 | -0.083 | -0.733 | 21941 | TNFRSF8   | NM_009401_4_-1  |
| Pglyrp1   | 0.563  | -1.199 | 4.317  | 4.374  | 7.491  | 7.913  | 7.210  | 6.847  | 7.005  | 6.319  | 21946 | PGLYRP1   | NM_009402_7_+1  |
| Tnfsf8    | -1.853 | -2.365 | -0.866 | -1.624 | 2.917  | 3.140  | 2.253  | 2.179  | -1.153 | -2.145 | 21949 | TNFSF8    | NM_009403_4_-1  |
| Tnfsf9    | 3.162  | 3.302  | 4.173  | 4.471  | 4.737  | 4.252  | 5.516  | 5.339  | 3.349  | 2.355  | 21950 | NA        | NM_009404_17_+1 |
| Tnni2     | 5.729  | 5.726  | 6.261  | 6.507  | 4.616  | 5.093  | 4.492  | 4.407  | 1.871  | 1.334  | 21953 | TNNI2     | NM_009405_7_+1  |
| Tnni3     | -0.222 | -3.315 | 1.391  | -0.511 | 1.874  | 0.704  | 2.436  | -0.668 | 0.729  | -1.040 | 21954 | TNNI3     | NM_009406_7_-1  |
| Top1      | 7.045  | 7.097  | 6.816  | 6.896  | 6.600  | 6.705  | 6.663  | 6.305  | 5.500  | 5.855  | 21969 | TOP1      | NM_009408_2_+1  |
| Top2b     | 6.148  | 6.155  | 7.132  | 6.853  | 6.997  | 7.138  | 6.887  | 6.830  | 6.841  | 7.164  | 21974 | TOP2B     | NM_009409_14_+1 |
| Top3a     | 2.765  | 2.430  | 2.842  | 3.025  | 2.999  | 2.519  | 3.043  | 2.700  | 3.870  | 3.660  | 21975 | TOP3A     | NM_009410_11_-1 |
| Tpd52     | 8.588  | 8.846  | 7.903  | 7.760  | 7.545  | 7.339  | 8.532  | 8.728  | 9.838  | 10.112 | 21985 | TPD52     | NM_009412_3_-1  |
| Tpi1      | 6.080  | 5.817  | 7.245  | 7.574  | 6.809  | 6.723  | 7.304  | 7.498  | 7.824  | 7.486  | 21991 | TP1       | NM_009415_6_-1  |
| Tpm2      | -1.715 | -2.763 | -1.191 | -3.518 | -1.131 | -2.546 | -3.477 | -4.886 | -4.981 | -4.981 | 22004 | NA        | NM_009416_4_-1  |
| Tpp2      | 4.306  | 4.461  | 5.631  | 5.626  | 5.788  | 5.732  | 6.160  | 6.080  | 6.827  | 6.876  | 22019 | TPP2      | NM_009418_1_+1  |
| Tpst2     | 5.580  | 6.499  | 5.158  | 5.497  | 4.153  | 4.646  | 5.327  | 6.256  | 7.259  | 7.191  | 22022 | TPST2     | NM_009419_5_+1  |
| Traf1     | 5.092  | 4.642  | 7.937  | 8.344  | 8.771  | 8.887  | 8.018  | 7.251  | 3.081  | 3.423  | 22029 | TRAF1     | NM_009421_2_-1  |
| Traf2     | 4.655  | 4.635  | 4.877  | 5.054  | 6.363  | 6.320  | 5.987  | 5.486  | 4.774  | 4.730  | 22030 | TRAF2     | NM_009422_2_-1  |
| Traf4     | 6.064  | 6.179  | 2.990  | 2.930  | 2.672  | 2.762  | 1.185  | 2.746  | -1.063 | -0.747 | 22032 | TRAF4     | NM_009423_11_-1 |
| Traf6     | 2.367  | 3.450  | 3.645  | 3.884  | 3.310  | 3.751  | 3.160  | 3.288  | 3.730  | 4.798  | 22034 | TRAF6     | NM_009424_2_+1  |
| Tnfsf10   | 1.391  | 1.663  | -0.910 | -1.304 | 0.885  | 0.872  | 1.330  | 1.403  | 2.513  | 1.719  | 22035 | TNFSF10   | NM_009425_3_+1  |
| Tob1      | 3.668  | 3.638  | 4.367  | 4.315  | 4.281  | 4.694  | 3.969  | 4.158  | 4.026  | 4.287  | 22057 | TOB1      | NM_009427_11_+1 |
| Trpc5     | -4.981 | -4.981 | -4.757 | -4.625 | -4.970 | -4.970 | -4.968 | -4.975 | -4.981 | -4.981 | 22067 | TRPC5     | NM_009428_X_-1  |
| Tpt1      | 10.160 | 10.083 | 10.173 | 10.215 | 9.876  | 9.834  | 10.188 | 9.997  | 9.363  | 9.441  | 22070 | TPT1      | NM_009429_14_+1 |
| Prss2     | -2.573 | -2.600 | -2.891 | -1.834 | -2.858 | -2.159 | -3.748 | -2.849 | -4.981 | -4.342 | 22072 | PRSS2     | NM_009430_6_+1  |
| Ctr9      | 4.748  | 4.728  | 4.923  | 5.089  | 5.068  | 5.124  | 4.994  | 5.000  | 5.095  | 5.233  | 22083 | CTR9      | NM_009431_7_+1  |
| Tshb      | -4.789 | -4.721 | -4.979 | -4.979 | -4.978 | -4.981 | -4.980 | -4.981 | -4.981 | -4.981 | 22094 | TSHB      | NM_009432_3_-1  |
| Tspyl1    | 7.040  | 7.025  | 6.621  | 6.488  | 6.750  | 6.690  | 6.443  | 6.416  | 6.398  | 6.501  | 22110 | TSPYL1    | NM_009433_10_+1 |
| Phlda2    | -4.981 | -4.981 | -3.694 | -2.553 | -2.131 | -3.843 | -3.198 | -3.313 | -4.394 | -3.855 | 22113 | PHLDA2    | NM_009434_7_-1  |
| Tssk2     | -2.573 | -4.981 | -4.811 | -4.573 | -4.207 | -4.957 | -3.824 | -4.657 | -4.981 | -4.981 | 22115 | TSSK2     | NM_009436_16_+1 |
| Tst       | -0.551 | -2.883 | -1.562 | -1.822 | -3.230 | -2.862 | -2.851 | -2.698 | -0.530 | -2.571 | 22117 | TST       | NM_009437_15_-1 |
| Rpl13a    | 9.407  | 9.325  | 9.525  | 9.428  | 9.294  | 9.133  | 9.429  | 9.265  | 8.201  | 7.928  | 22121 | RPL13A    | NM_009438_7_-1  |
| Psm3      | 6.880  | 6.845  | 6.701  | 6.985  | 6.806  | 6.774  | 6.664  | 6.698  | 6.859  | 6.671  | 22123 | PSMD3     | NM_009439_11_+1 |

|         |        |        |        |        |        |        |        |        |        |        |        |         |                 |
|---------|--------|--------|--------|--------|--------|--------|--------|--------|--------|--------|--------|---------|-----------------|
| Tsx     | -4.981 | -4.981 | -5.000 | -3.003 | -4.132 | -2.236 | -4.379 | -3.555 | -4.190 | -4.981 | 22127  | NA      | NM_009440_X_+1  |
| Ttc3    | 5.245  | 5.530  | 5.532  | 5.225  | 5.453  | 5.342  | 4.965  | 5.056  | 2.708  | 3.288  | 22129  | TTC3    | NM_009441_16_+1 |
| Ttf1    | 4.492  | 4.791  | 4.464  | 4.189  | 4.820  | 4.829  | 4.664  | 4.507  | 4.336  | 4.514  | 22130  | NA      | NM_009442_2_+1  |
| Tgolin1 | 6.690  | 6.583  | 6.697  | 6.792  | 6.786  | 6.841  | 6.802  | 6.819  | 7.018  | 7.250  | 22134  | NA      | NM_009443_6_-1  |
| Tgolin2 | -0.917 | -4.886 | 3.382  | 3.333  | 0.345  | -0.712 | -0.584 | 0.257  | 3.293  | 3.937  | 22135  | NA      | NM_009444_6_-1  |
| Ttk     | -4.681 | -4.599 | 0.183  | 0.863  | 1.990  | 1.125  | 0.479  | 0.847  | -0.153 | -1.090 | 22137  | TTK     | NM_009445_9_+1  |
| Tuba3a  | -4.981 | -4.981 | -4.981 | -4.981 | -4.194 | -4.593 | -4.918 | -4.530 | -4.981 | -4.981 | 22144  | TUBA3E  | NM_009446_6_-1  |
| Tuba4a  | 7.543  | 7.740  | 5.819  | 5.958  | 6.260  | 6.275  | 6.110  | 6.141  | 6.830  | 5.784  | 22145  | TUBA4A  | NM_009447_1_-1  |
| Tuba1c  | 6.225  | 6.620  | 8.269  | 8.770  | 7.268  | 7.488  | 7.379  | 7.278  | 6.711  | 6.672  | 22146  | TUBA1C  | NM_009448_15_+1 |
| Tubb2a  | 8.157  | 8.247  | 7.857  | 7.831  | 5.271  | 5.525  | 5.087  | 5.903  | 5.219  | 5.323  | 22151  | TUBB2A  | NM_009450_13_-1 |
| Tubb4a  | -2.948 | -2.681 | -1.822 | -1.983 | -2.344 | -2.792 | -1.573 | -2.279 | -1.176 | -2.411 | 22153  | TUBB4A  | NM_009451_17_-1 |
| Tnfsf4  | -4.981 | -4.981 | -2.754 | -1.746 | -0.425 | -1.042 | -0.725 | -1.768 | -4.981 | -4.981 | 22164  | TNFSF4  | NM_009452_1_+1  |
| Zrsr2   | 2.590  | 2.900  | 2.898  | 2.915  | 2.972  | 2.606  | 3.228  | 2.333  | 2.549  | 2.505  | 22184  | ZRSR2   | NM_009453_X_-1  |
| Ube2e3  | 6.418  | 5.837  | 6.436  | 6.387  | 6.220  | 5.659  | 5.985  | 5.488  | 5.380  | 4.573  | 22193  | UBE2E3  | NM_009454_2_+1  |
| Ube2e1  | 6.494  | 6.490  | 6.423  | 6.353  | 6.121  | 6.120  | 6.158  | 5.911  | 5.394  | 5.918  | 22194  | UBE2E1  | NM_009455_14_-1 |
| Ube2l3  | 8.188  | 8.074  | 8.261  | 8.303  | 8.154  | 8.010  | 8.115  | 8.079  | 8.223  | 8.104  | 22195  | UBE2L3  | NM_009456_16_-1 |
| Uba1    | 2.515  | 2.282  | 2.349  | 1.658  | 2.240  | 2.972  | 2.980  | 3.464  | 3.669  | 3.138  | 22201  | UBA1    | NM_009457_X_+1  |
| Ube2b   | 7.513  | 7.702  | 7.343  | 7.164  | 7.361  | 7.366  | 7.134  | 7.171  | 6.754  | 7.083  | 22210  | UBE2B   | NM_009458_11_-1 |
| Ube2h   | 5.287  | 5.592  | 5.433  | 5.580  | 5.416  | 5.436  | 5.493  | 5.948  | 5.982  | 6.602  | 22214  | UBE2H   | NM_009459_6_-1  |
| Sumo1   | 8.671  | 8.572  | 7.971  | 8.037  | 8.344  | 8.169  | 8.059  | 7.831  | 7.348  | 7.264  | 22218  | SUMO1   | NM_009460_1_-1  |
| Ubr1    | 4.956  | 4.697  | 5.106  | 4.759  | 5.227  | 5.026  | 4.887  | 4.845  | 4.706  | 5.031  | 22222  | UBR1    | NM_009461_2_-1  |
| Usp10   | 3.901  | 3.862  | 5.049  | 5.089  | 5.147  | 4.921  | 4.923  | 4.914  | 4.633  | 4.354  | 22224  | USP10   | NM_009462_8_+1  |
| Ucp1    | -4.981 | -4.981 | -4.107 | 3.349  | -1.701 | 0.815  | -3.124 | -0.577 | -4.981 | -3.233 | 22227  | UCP1    | NM_009463_8_+1  |
| Ucp3    | -4.981 | -4.981 | -3.297 | -4.280 | -4.604 | -4.996 | -2.920 | -4.562 | -3.351 | -2.118 | 22229  | UCP3    | NM_009464_7_+1  |
| Axl     | 2.953  | -3.732 | 1.505  | 3.032  | 2.560  | 1.771  | 3.737  | 4.435  | 4.789  | 4.162  | 26362  | AXL     | NM_009465_7_-1  |
| Ugdh    | 4.355  | 4.714  | 4.902  | 5.100  | 4.810  | 4.882  | 4.815  | 4.859  | 5.571  | 5.656  | 22235  | UGDH    | NM_009466_5_-1  |
| Dpysl3  | -4.614 | -4.981 | -4.936 | -2.108 | -4.574 | -0.650 | -3.440 | -4.956 | -4.981 | -4.784 | 22240  | DPYSL3  | NM_009468_18_-1 |
| Ulk1    | 2.999  | 3.550  | 3.342  | 2.963  | 3.591  | 3.662  | 4.081  | 4.289  | 5.671  | 5.482  | 22241  | ULK1    | NM_009469_5_-1  |
| Umps    | 4.589  | 4.745  | 5.613  | 6.017  | 5.232  | 5.299  | 5.066  | 5.465  | 5.199  | 5.375  | 22247  | UMPS    | NM_009471_16_-1 |
| Unc5c   | -4.981 | -4.981 | -4.981 | -4.981 | -3.984 | -4.005 | -4.979 | -4.957 | -4.981 | -4.981 | 22253  | UNC5C   | NM_009472_3_+1  |
| Nr1h2   | 1.725  | 0.756  | 1.063  | 1.307  | -0.048 | 0.576  | 0.747  | 1.147  | 0.714  | 1.423  | 22260  | NR1H2   | NM_009473_7_-1  |
| Uox     | -4.981 | -4.981 | -4.017 | -2.992 | -3.471 | -3.858 | -3.988 | -3.373 | -4.981 | -4.981 | 22262  | NA      | NM_009474_3_+1  |
| Upp1    | -4.794 | -4.981 | -2.395 | -3.832 | -4.708 | -4.817 | -4.739 | -2.510 | -4.365 | -4.319 | 22271  | UPP1    | NM_009477_11_+1 |
| Urod    | 6.145  | 6.181  | 4.762  | 5.256  | 5.026  | 5.674  | 5.102  | 5.730  | 5.338  | 5.226  | 22275  | UROD    | NM_009478_4_-1  |
| Uros    | 2.411  | 2.086  | 2.095  | 1.741  | 2.200  | 1.723  | 1.702  | 0.123  | 0.976  | 0.879  | 22276  | UROS    | NM_009479_7_-1  |
| Usf1    | 1.764  | 1.917  | 0.385  | 0.649  | 0.444  | 0.779  | 0.645  | 0.633  | 1.673  | 1.372  | 22278  | USF1    | NM_009480_1_+1  |
| Usp9x   | 5.078  | 5.409  | 5.899  | 5.795  | 5.598  | 5.642  | 5.759  | 5.577  | 5.758  | 6.381  | 22284  | USP9X   | NM_009481_X_+1  |
| Utf1    | -4.981 | -4.981 | 1.136  | 2.616  | 1.837  | 1.020  | 0.880  | -0.036 | -4.981 | -3.386 | 22286  | UTF1    | NM_009482_7_+1  |
| Kdm6a   | 0.324  | 0.923  | 2.550  | 2.361  | 2.194  | 1.858  | 2.163  | 1.008  | 1.292  | 1.704  | 22289  | KDM6A   | NM_009483_X_+1  |
| Vamp1   | 2.401  | 2.018  | 0.646  | -0.498 | 1.075  | -3.234 | 0.706  | 0.378  | -0.819 | -1.567 | 22317  | VAMP1   | NM_009496_6_+1  |
| Vamp2   | 6.103  | 5.952  | 5.508  | 5.316  | 5.884  | 5.828  | 5.607  | 5.645  | 5.792  | 5.542  | 22318  | VAMP2   | NM_009497_11_+1 |
| Vamp3   | 7.161  | 7.235  | 7.118  | 7.009  | 5.640  | 5.652  | 6.305  | 6.823  | 7.355  | 7.304  | 22319  | VAMP3   | NM_009498_4_-1  |
| Vasp    | 2.688  | 2.983  | 5.156  | 4.992  | 5.896  | 5.529  | 5.419  | 5.242  | 5.498  | 5.210  | 22323  | VASP    | NM_009499_7_-1  |
| Vav2    | 2.250  | 1.271  | 2.749  | 2.513  | 4.185  | 4.067  | 3.247  | 3.108  | 3.655  | 4.279  | 22325  | VAV2    | NM_009500_2_-1  |
| Vcl     | 4.739  | 5.394  | 4.562  | 5.103  | 4.191  | 4.662  | 5.093  | 5.624  | 7.012  | 7.327  | 22330  | VCL     | NM_009502_14_+1 |
| Vcp     | 7.732  | 7.231  | 8.668  | 8.659  | 8.091  | 7.856  | 8.011  | 7.902  | 8.618  | 8.179  | 269523 | VCP     | NM_009503_4_-1  |
| Vdr     | -0.147 | -1.081 | -0.200 | 2.257  | -3.245 | -4.389 | -0.681 | -1.405 | 1.048  | -0.643 | 22337  | VDR     | NM_009504_15_-1 |
| Vegfa   | -4.981 | -4.343 | -2.991 | -4.781 | 1.775  | -0.431 | 1.733  | -0.928 | -0.002 | 0.759  | 22339  | VEGFA   | NM_009505_17_-1 |
| Vegfc   | 2.934  | 3.913  | -4.917 | -3.312 | -0.420 | 0.095  | 2.375  | 2.088  | 0.796  | 1.167  | 22341  | VEGFC   | NM_009506_8_+1  |
| Vhl     | 4.689  | 4.734  | 6.962  | 7.024  | 5.243  | 5.013  | 5.964  | 5.914  | 5.647  | 5.537  | 22346  | VHL     | NM_009507_6_+1  |
| Vil1    | -4.981 | -4.981 | -1.759 | -0.588 | -3.525 | -2.534 | -2.101 | -3.934 | -2.724 | -3.323 | 22349  | VIL1    | NM_009509_1_+1  |
| Ezr     | 6.763  | 6.522  | 7.489  | 7.417  | 7.760  | 7.725  | 7.336  | 7.588  | 7.828  | 7.409  | 22350  | EZR     | NM_009510_17_-1 |
| Vipr2   | -1.987 | -3.408 | -3.710 | -4.930 | -4.945 | -4.759 | -4.878 | -3.961 | -2.809 | -4.981 | 22355  | VIPR2   | NM_009511_12_+1 |
| Slc27a5 | -3.189 | -4.981 | -4.247 | -4.827 | -4.380 | -4.862 | -4.309 | -3.360 | -1.912 | -4.981 | 26459  | SLC27A5 | NM_009512_7_-1  |
| Vpreb3  | 0.811  | -2.353 | -2.366 | -0.323 | -1.568 | 1.557  | 1.016  | 3.312  | -2.327 | -3.435 | 22364  | VPREB3  | NM_009514_10_+1 |
| Was     | 4.265  | 4.356  | 4.905  | 5.126  | 5.559  | 5.763  | 5.402  | 5.473  | 5.710  | 5.939  | 22376  | WAS     | NM_009515_X_-1  |
| Wee1    | 3.189  | 2.300  | 3.300  | 3.882  | 3.692  | 3.708  | 3.147  | 3.103  | 0.965  | 2.310  | 22390  | WEE1    | NM_009516_7_+1  |
| Zmat3   | 1.539  | 2.444  | 2.015  | 1.145  | 2.066  | 1.981  | 1.490  | 1.221  | 1.576  | 2.013  | 22401  | ZMAT3   | NM_009517_3_-1  |
| Wnt10a  | 2.564  | 1.955  | -4.981 | -2.840 | -3.794 | -3.379 | -4.398 | -2.780 | -4.981 | -4.981 | 22409  | WNT10A  | NM_009518_1_+1  |
| Wnt11   | -4.981 | -4.981 | -3.736 | -3.534 | 1.127  | 0.029  | -0.212 | -0.325 | -3.767 | -4.729 | 22411  | WNT11   | NM_009519_7_+1  |
| Wnt2b   | -3.668 | -2.153 | -2.859 | -4.012 | -2.942 | -3.623 | -3.689 | -3.078 | -2.063 | -1.764 | 22414  | WNT2B   | NM_009520_3_-1  |
| Wnt3    | -4.981 | -4.981 | -4.978 | -2.231 | -3.669 | -2.378 | -4.505 | -4.966 | -3.750 | -4.981 | 22415  | WNT3    | NM_009521_11_+1 |
| Wnt4    | -2.151 | -1.630 | -0.077 | -1.147 | -0.376 | -0.848 | -0.970 | -1.576 | -0.025 | -0.246 | 22417  | WNT4    | NM_009523_4_+1  |
| Wnt5b   | -4.981 | -4.981 | -4.896 | -4.959 | -4.962 | -4.962 | -4.743 | -4.140 | -4.968 | -4.967 | 22419  | WNT5B   | NM_009525_6_-1  |
| Wnt6    | -0.727 | -0.169 | -0.166 | -0.252 | -1.855 | -0.423 | 0.680  | 0.559  | 1.219  | 1.376  | 22420  | WNT6    | NM_009526_1_+1  |
| Atrx    | 7.435  | 7.473  | 8.025  | 7.856  | 7.970  | 7.924  | 7.472  | 7.221  | 6.715  | 7.066  | 22589  | ATRX    | NM_009530_X_-1  |
| Xpc     | 3.675  | 3.749  | 3.179  | 3.428  | 4.706  | 5.000  | 4.641  | 4.301  | 5.592  | 5.336  | 22591  | XPC     | NM_009531_6_-1  |
| Xrcc1   | 4.883  | 5.270  | 4.157  | 4.422  | 4.518  | 4.548  | 4.393  | 4.742  | 4.306  | 4.238  | 22594  | XRCC1   | NM_009532_7_+1  |
| Xrcc5   | 1.097  | 1.366  | -0.722 | 0.319  | 2.594  | 3.341  | 0.906  | 2.258  | -1.773 | -0.835 | 22596  | XRCC5   | NM_009533_1_+1  |
| Yap1    | -2.179 | -3.111 | -4.983 | -2.894 | -4.950 | -3.889 | -3.751 | -4.093 | -4.981 | -4.482 | 22601  | YAP1    | NM_009534_9_-1  |
| Yes1    | -3.563 | -4.764 | -2.149 | -1.613 | -4.727 | -3.055 | -4.931 | -3.702 | -4.943 | -4.954 | 22612  | YES1    | NM_009535_5_+1  |
| Ywhae   | 7.873  | 8.067  | 7.874  | 8.107  | 7.647  | 7.718  | 7.484  | 7.776  | 7.634  | 7.923  | 22627  | YWHAE   | NM_009536_11_+1 |
| Yy1     | 5.095  | 5.119  | 4.622  | 4.701  | 4.847  | 5.016  | 4.842  | 4.653  | 4.058  | 4.338  | 22632  | YY1     | NM_009537_12_+1 |
| Plagl1  | -4.981 | -4.981 | -1.965 | -1.923 | -1.381 | -2.434 | -1.528 | -2.597 | -2.027 | -0.593 | 22634  | PLAGL1  | NM_009538_10_+1 |

|         |        |        |        |        |        |        |        |        |        |        |        |         |                 |
|---------|--------|--------|--------|--------|--------|--------|--------|--------|--------|--------|--------|---------|-----------------|
| Zap70   | -3.583 | -2.709 | -4.828 | -3.007 | -4.119 | -0.880 | -1.213 | -0.158 | -4.981 | -1.848 | 22637  | ZAP70   | NM_009539_1_+1  |
| Zbtb17  | 4.409  | 4.559  | 4.518  | 4.730  | 4.720  | 4.843  | 4.601  | 4.842  | 4.917  | 5.275  | 22642  | ZBTB17  | NM_009541_4_+1  |
| Zfp101  | 1.760  | 1.626  | 1.491  | 1.269  | 2.284  | 1.434  | 2.352  | 2.090  | 2.363  | 3.019  | 22643  | NA      | NM_009542_17_-1 |
| Rnf103  | 4.649  | 5.058  | 4.782  | 4.367  | 4.088  | 3.915  | 4.518  | 4.549  | 4.920  | 5.293  | 22644  | RNF103  | NM_009543_6_+1  |
| Zfp105  | -4.981 | -0.896 | -0.581 | 1.046  | 0.314  | 1.641  | -0.546 | 0.782  | -1.848 | 0.936  | 22646  | ZNF35   | NM_009544_9_+1  |
| Pcgf2   | -4.915 | -4.635 | -4.880 | -4.961 | -4.961 | -4.973 | -4.929 | -3.959 | -4.976 | -4.964 | 22658  | PCGF2   | NM_009545_11_-1 |
| Trim25  | 6.550  | 7.009  | 5.996  | 5.421  | 5.652  | 4.831  | 6.184  | 5.439  | 6.975  | 6.438  | 217069 | TRIM25  | NM_009546_11_+1 |
| Zbtb14  | 3.641  | 3.995  | 3.962  | 3.992  | 3.963  | 4.004  | 4.166  | 3.934  | 4.254  | 4.585  | 22666  | ZBTB14  | NM_009547_17_+1 |
| Zfand5  | 6.696  | 6.903  | 7.390  | 7.263  | 8.037  | 7.730  | 7.987  | 7.854  | 8.170  | 8.409  | 22682  | ZFAND5  | NM_009551_19_+1 |
| Zscan2  | -0.579 | -1.951 | -3.362 | -3.003 | -1.364 | -2.174 | -2.891 | -3.713 | -2.679 | -3.758 | 22691  | ZSCAN2  | NM_009553_7_+1  |
| Zfp37   | -4.981 | -4.304 | -4.622 | -4.823 | -4.821 | -4.935 | -4.917 | -3.004 | -4.981 | -4.981 | 22696  | ZFP37   | NM_009554_4_-1  |
| Zfp40   | 2.674  | 3.228  | 1.936  | 2.419  | 2.053  | 2.186  | 1.844  | 2.079  | 1.826  | 2.698  | 22700  | NA      | NM_009555_17_-1 |
| Zfp46   | 2.413  | 2.646  | 3.165  | 2.821  | 2.913  | 2.523  | 2.831  | 2.184  | 3.602  | 3.223  | 22704  | ZNF436  | NM_009557_4_+1  |
| Zfp51   | 3.769  | 4.206  | 3.437  | 3.376  | 3.560  | 3.243  | 3.622  | 3.080  | 3.369  | 3.307  | 22709  | ZNF761  | NM_009558_17_+1 |
| Zfp60   | 0.416  | -0.338 | -2.516 | -1.462 | -0.294 | -0.662 | -0.057 | -3.119 | -4.336 | -1.459 | 22718  | NA      | NM_009560_7_+1  |
| Zfp61   | 3.821  | 4.255  | 3.387  | 4.128  | 3.011  | 3.467  | 2.816  | 3.780  | 3.332  | 3.817  | 22719  | NA      | NM_009561_7_-1  |
| Zfp62   | 5.631  | 5.433  | 6.537  | 6.170  | 6.537  | 6.301  | 5.949  | 5.679  | 5.053  | 5.311  | 22720  | ZFP62   | NM_009562_11_+1 |
| Zfp64   | 3.617  | 3.479  | 3.394  | 3.588  | 3.133  | 3.415  | 3.215  | 3.398  | 3.690  | 3.388  | 22722  | ZFP64   | NM_009564_2_-1  |
| Zbtb7b  | 2.293  | 2.810  | 3.722  | 3.488  | 4.350  | 4.201  | 4.866  | 4.419  | 5.382  | 5.373  | 22724  | ZBTB7B  | NM_009565_3_-1  |
| Zfp92   | -4.981 | -4.981 | -3.782 | -4.906 | -4.430 | -4.040 | -4.823 | -4.718 | -4.981 | -4.981 | 22754  | ZFP92   | NM_009566_X_+1  |
| Zfp93   | -0.159 | -1.910 | 0.358  | -0.697 | -0.979 | -1.450 | -0.975 | -1.524 | -0.945 | -1.065 | 22755  | NA      | NM_009567_7_+1  |
| Zfp94   | 1.590  | 1.675  | 1.053  | 0.390  | 1.371  | 1.195  | 1.157  | 1.246  | 0.703  | -1.669 | 22756  | NA      | NM_009568_7_-1  |
| Zfpm1   | -0.481 | -0.491 | 0.602  | 1.619  | -0.149 | 1.183  | 0.576  | 1.770  | 1.901  | 1.606  | 22761  | ZFPM1   | NM_009569_8_+1  |
| Zhx1    | 4.745  | 5.003  | 5.263  | 5.585  | 4.936  | 4.942  | 5.533  | 5.254  | 5.573  | 6.152  | 22770  | ZHX1    | NM_009572_15_-1 |
| Zic1    | -4.981 | -4.981 | -4.629 | -4.970 | -4.714 | -4.961 | -4.748 | -4.939 | -4.981 | -4.981 | 22771  | ZIC1    | NM_009573_9_-1  |
| Zik1    | -1.695 | 1.300  | -1.442 | -1.686 | -0.431 | 0.804  | -2.154 | -0.695 | -3.531 | 0.245  | 22775  | ZIK1    | NM_009577_7_-1  |
| Ikzf1   | 5.638  | 5.571  | 4.225  | 3.632  | 5.174  | 4.885  | 4.660  | 4.504  | 5.021  | 4.631  | 22778  | IKZF1   | NM_009578_11_+1 |
| Slc30a1 | 3.464  | 3.838  | 3.505  | 3.451  | 3.486  | 3.610  | 3.619  | 3.922  | 4.424  | 4.982  | 22782  | SLC30A1 | NM_009579_1_+1  |
| Zp1     | -1.587 | -4.981 | 0.500  | -0.609 | -2.932 | -3.296 | -3.486 | -4.118 | -4.981 | -4.981 | 22786  | ZP1     | NM_009580_19_-1 |
| Map3k12 | 0.416  | 0.624  | 2.058  | 0.653  | 0.357  | -0.052 | 0.716  | -1.240 | 0.152  | 1.219  | 26404  | MAP3K12 | NM_009582_15_-1 |
| Dnajc2  | 5.982  | 5.812  | 6.450  | 6.266  | 6.669  | 6.646  | 6.381  | 5.845  | 4.906  | 4.644  | 22791  | DNAJC2  | NM_009584_5_-1  |
| Aanat   | -2.378 | -4.981 | -4.972 | -4.972 | -4.983 | -4.983 | -4.931 | -4.619 | -4.981 | -3.855 | 11298  | AANAT   | NM_009591_11_+1 |
| Abcb7   | 3.817  | 4.087  | 4.035  | 3.885  | 4.252  | 4.220  | 4.542  | 4.139  | 5.517  | 5.721  | 11306  | ABCB7   | NM_009592_X_-1  |
| Abcg1   | 4.274  | 0.669  | 6.613  | 6.021  | 6.215  | 6.030  | 6.374  | 5.667  | 5.392  | 4.266  | 11307  | ABCG1   | NM_009593_17_+1 |
| Abl1    | 4.257  | 4.220  | 5.219  | 5.402  | 5.888  | 6.015  | 5.811  | 5.221  | 5.247  | 5.512  | 11350  | ABL1    | NM_009594_2_+1  |
| Abl2    | -3.061 | -2.789 | -1.158 | -2.434 | -0.953 | -1.852 | -1.559 | -4.492 | -0.476 | -4.013 | 11352  | ABL2    | NM_009595_1_+1  |
| Asic1   | -2.268 | -2.353 | -0.870 | -2.533 | -1.681 | -0.524 | -1.925 | -1.850 | -0.889 | -0.568 | 11419  | ASIC1   | NM_009597_15_+1 |
| Ace     | -4.981 | -4.981 | -2.127 | -1.541 | -1.408 | -1.848 | 4.164  | 1.976  | 0.736  | 0.789  | 11421  | ACE     | NM_009598_11_+1 |
| Ache    | -3.385 | -3.091 | -3.750 | -1.127 | -4.613 | -1.202 | -2.094 | -1.504 | -3.127 | -2.548 | 11423  | ACHE    | NM_009599_5_+1  |
| Chrnbl  | 3.939  | 4.255  | 2.303  | 2.457  | 1.722  | 2.116  | 0.704  | 1.258  | -1.778 | -2.283 | 11443  | CHRNBL  | NM_009601_11_-1 |
| Chrnbl2 | -1.518 | -2.349 | -2.070 | -2.193 | -2.472 | -2.774 | -2.518 | -0.480 | -0.083 | -0.514 | 11444  | CHRNBL2 | NM_009602_3_-1  |
| Chrne   | -1.910 | -4.981 | -3.722 | -3.308 | -1.441 | -2.760 | -1.633 | -4.243 | -4.981 | -4.981 | 11448  | CHRNE   | NM_009603_11_-1 |
| Chrng   | -4.981 | -4.981 | -3.986 | -4.986 | -3.757 | -4.424 | -3.613 | -4.999 | -4.981 | -4.981 | 11449  | CHRNG   | NM_009604_1_+1  |
| Adipoq  | -4.981 | -4.981 | -3.091 | -3.350 | -1.337 | -3.774 | -3.245 | -4.768 | -1.650 | -3.480 | 11450  | ADIPOQ  | NM_009605_16_+1 |
| Acta1   | -4.981 | -4.981 | -4.463 | -4.447 | -4.449 | -4.956 | -4.680 | -4.979 | -3.291 | -3.161 | 11459  | ACTA1   | NM_009606_8_-1  |
| Actg1   | 10.248 | 10.415 | 12.137 | 12.202 | 11.750 | 11.603 | 11.337 | 11.428 | 12.339 | 12.531 | 11465  | ACTG1   | NM_009609_11_-1 |
| Actg2   | -4.981 | -4.981 | -4.958 | -4.849 | -4.441 | -3.688 | -4.975 | -4.422 | -3.925 | -4.981 | 11468  | ACTG2   | NM_009610_6_-1  |
| Acvrl1  | -0.882 | -0.141 | 5.186  | 5.560  | 0.635  | 2.781  | 3.819  | 4.539  | 4.620  | 4.843  | 11482  | ACVRL1  | NM_009612_15_+1 |
| Adam11  | 6.014  | 2.758  | 1.478  | 1.892  | 3.568  | 1.592  | 2.452  | -1.010 | -3.242 | -2.965 | 11488  | ADAM11  | NM_009613_11_+1 |
| Adam15  | 0.095  | 0.710  | 1.380  | 0.259  | -0.374 | -0.461 | 2.062  | 3.084  | 5.849  | 6.138  | 11490  | ADAM15  | NM_009614_3_-1  |
| Adam17  | 4.925  | 5.848  | 6.022  | 6.565  | 5.933  | 6.799  | 6.488  | 7.118  | 7.031  | 8.283  | 11491  | ADAM17  | NM_009615_12_-1 |
| Adam19  | 5.871  | 6.166  | 7.409  | 6.823  | 5.725  | 6.396  | 4.508  | 4.747  | 2.720  | 5.128  | 11492  | ADAM19  | NM_009616_11_+1 |
| Adam2   | -0.303 | -2.895 | -4.981 | -4.981 | -4.981 | -4.981 | -4.981 | -4.981 | -4.981 | -4.981 | 11495  | ADAM2   | NM_009618_14_-1 |
| Adam3   | -4.981 | -4.981 | -4.961 | -4.587 | -4.854 | -4.956 | -4.287 | -4.466 | -1.871 | -2.420 | 11497  | NA      | NM_009619_8_-1  |
| Adam4   | -1.376 | -0.082 | -1.844 | -1.557 | -1.656 | -1.147 | -0.831 | -1.082 | -0.537 | -0.972 | 11498  | NA      | NM_009620_12_-1 |
| Adcy9   | 1.419  | 1.406  | 0.674  | 0.489  | -4.765 | -1.225 | -1.474 | -0.817 | 2.033  | 2.390  | 11515  | ADCY9   | NM_009624_16_-1 |
| Adm     | 0.538  | -1.218 | -1.073 | 0.377  | 3.152  | 2.194  | 0.925  | -0.219 | -4.981 | -2.647 | 11535  | ADM     | NM_009627_7_+1  |
| Adnp    | 1.348  | 0.040  | 0.658  | 0.382  | 0.931  | 0.325  | -0.352 | -0.566 | 0.549  | 0.313  | 11538  | ADNP    | NM_009628_2_-1  |
| Adora2a | 1.411  | 1.865  | 2.970  | 2.614  | 3.574  | 2.823  | 3.290  | 3.208  | 3.969  | 4.219  | 11540  | ADORA2A | NM_009630_10_+1 |
| Adora3  | -0.998 | -0.887 | 4.263  | 3.919  | 0.448  | 0.948  | -0.100 | 0.771  | 0.837  | 0.725  | 11542  | ADORA3  | NM_009631_3_+1  |
| Parp2   | 5.948  | 5.590  | 5.491  | 5.323  | 5.841  | 5.601  | 6.074  | 5.707  | 5.613  | 5.296  | 11546  | PARP2   | NM_009632_14_+1 |
| Adsl    | 6.037  | 5.923  | 5.764  | 5.834  | 5.773  | 5.677  | 5.400  | 5.716  | 5.011  | 4.782  | 11564  | ADSL    | NM_009634_15_+1 |
| Avil    | -2.739 | -4.981 | -1.253 | -1.079 | -4.741 | -2.021 | -4.709 | -4.393 | -3.109 | -2.885 | 11567  | AVIL    | NM_009635_10_+1 |
| Aebp1   | -4.981 | -4.981 | -4.406 | -4.886 | -4.978 | -4.789 | -4.791 | -4.957 | -4.981 | -4.981 | 11568  | AEBP1   | NM_009636_11_+1 |
| Aebp2   | -1.716 | 0.197  | 0.887  | 0.899  | 2.340  | 1.913  | 0.863  | 0.347  | 0.134  | -0.456 | 11569  | AEBP2   | NM_009637_6_+1  |
| Crisp3  | -4.981 | -4.981 | -4.841 | -2.268 | -4.968 | -1.772 | -4.944 | -1.242 | -4.981 | -3.498 | 11572  | NA      | NM_009639_17_-1 |
| Angpt1  | 0.449  | -0.728 | -1.011 | -1.712 | -1.879 | -2.100 | -1.379 | -1.621 | -2.609 | -1.265 | 11600  | ANGPT1  | NM_009640_15_-1 |
| Angpt4  | 1.500  | -1.018 | -3.582 | -3.704 | -4.946 | -3.441 | -4.964 | -3.379 | -4.981 | -3.758 | 11602  | ANGPT4  | NM_009641_2_+1  |
| Agtrap  | 6.507  | 5.462  | 4.545  | 3.897  | 4.284  | 3.693  | 4.633  | 4.239  | 5.122  | 3.971  | 11610  | AGTRAP  | NM_009642_4_-1  |
| Ahnak   | 8.322  | 8.092  | 6.060  | 5.901  | 2.478  | 3.426  | 6.561  | 7.750  | 9.824  | 10.090 | 66395  | AHNAK   | NM_009643_19_+1 |
| Ahrr    | -2.178 | -2.600 | 0.285  | -0.507 | 2.812  | 3.899  | 1.486  | 1.717  | 1.227  | 1.382  | 11624  | AHRR    | NM_009644_13_-1 |
| Aicda   | -3.843 | -4.981 | -4.981 | -4.981 | -2.509 | -3.225 | -0.424 | -2.594 | -2.519 | -2.519 | 11628  | AICDA   | NM_009645_6_+1  |
| Aire    | -4.900 | -4.981 | -1.350 | -0.835 | -0.393 | 0.186  | -3.882 | -4.510 | -4.981 | -4.981 | 11634  | AIRE    | NM_009646_10_-1 |
| Ak4     | -4.981 | -4.981 | -1.817 | -4.883 | -4.969 | -4.969 | -4.045 | -4.957 | -4.981 | -4.981 | 11639  | AK4     | NM_009647_4_+1  |

|         |        |        |        |        |        |        |        |        |        |        |       |         |                 |
|---------|--------|--------|--------|--------|--------|--------|--------|--------|--------|--------|-------|---------|-----------------|
| Akap1   | -0.084 | 1.473  | 0.695  | 0.991  | -0.542 | 0.152  | -0.573 | 0.289  | -0.031 | -0.014 | 11640 | AKAP1   | NM_009648_11_-1 |
| Akap2   | 3.214  | 3.750  | 4.541  | 5.180  | 3.951  | 3.879  | 2.417  | 2.201  | -4.981 | -1.096 | 11641 | AKAP2   | NM_009649_4_+1  |
| Akt1    | 5.902  | 5.470  | 7.194  | 7.126  | 7.083  | 6.780  | 7.257  | 7.094  | 8.683  | 8.077  | 11651 | AKT1    | NM_009652_12_-1 |
| Alas2   | 0.358  | 3.077  | 2.287  | 5.094  | 1.858  | 5.481  | 1.653  | 5.314  | 1.942  | 3.990  | 11656 | ALAS2   | NM_009653_X_+1  |
| Alcam   | 4.100  | 4.443  | 5.559  | 5.109  | 5.904  | 5.752  | 5.743  | 5.327  | 4.908  | 5.136  | 11658 | ALCAM   | NM_009655_16_-1 |
| Aldh2   | 6.419  | 6.275  | 5.372  | 5.819  | 4.805  | 4.334  | 5.935  | 6.225  | 7.846  | 7.910  | 11669 | ALDH2   | NM_009656_5_-1  |
| Aldoc   | -4.104 | -3.978 | -4.318 | -1.949 | -4.266 | -4.840 | -3.973 | -4.803 | -4.398 | -4.643 | 11676 | ALDOC   | NM_009657_11_+1 |
| Akr1b3  | 5.272  | 5.260  | 5.232  | 5.278  | 5.197  | 5.169  | 5.202  | 4.898  | 5.282  | 5.067  | 11677 | AKR1B1  | NM_009658_6_-1  |
| Alox15  | -4.981 | -4.981 | -1.555 | -1.526 | -3.361 | -1.557 | 1.211  | -1.343 | -0.899 | -4.342 | 11687 | ALOX15  | NM_009660_11_-1 |
| Alox8   | -3.699 | -4.981 | -0.117 | 0.826  | -1.019 | 0.823  | 0.200  | 1.424  | -1.540 | 0.486  | 11688 | ALOX15B | NM_009661_11_-1 |
| Alox5   | -0.358 | -4.981 | 1.136  | 1.086  | -3.462 | -0.212 | 3.596  | 2.661  | 4.697  | 3.505  | 11689 | ALOX5   | NM_009662_6_-1  |
| Alox5ap | 9.535  | 9.605  | 9.064  | 8.895  | 8.867  | 8.763  | 8.864  | 8.727  | 9.817  | 9.637  | 11690 | ALOX5AP | NM_009663_5_+1  |
| Amd1    | 3.915  | 4.401  | 5.357  | 5.214  | 4.759  | 5.026  | 5.516  | 5.413  | 5.191  | 5.524  | 11702 | AMD1    | NM_009665_10_-1 |
| Amelx   | -4.880 | -4.551 | -4.980 | -4.981 | -4.687 | -1.231 | -4.679 | -4.925 | -4.981 | -4.981 | 11704 | AMELY   | NM_009666_X_-1  |
| Ampd3   | -2.993 | -2.475 | -3.431 | -0.472 | -3.744 | -1.358 | 1.617  | 1.199  | 1.087  | -0.050 | 11717 | AMPD3   | NM_009667_7_+1  |
| Bin1    | 0.471  | -0.592 | -0.330 | -1.772 | 1.161  | 0.167  | -0.207 | -1.022 | -1.292 | -1.821 | 30948 | BIN1    | NM_009668_18_+1 |
| Ankfy1  | 4.602  | 4.587  | 6.008  | 5.942  | 5.828  | 5.701  | 6.180  | 6.107  | 6.896  | 7.074  | 11736 | ANKFY1  | NM_009671_11_+1 |
| Anp32a  | 5.429  | 5.175  | 4.540  | 4.815  | 4.979  | 5.329  | 4.956  | 4.446  | 3.799  | 3.499  | 11737 | NA      | NM_009672_9_+1  |
| Anxa5   | 7.729  | 7.771  | 8.744  | 8.672  | 8.432  | 8.236  | 8.894  | 9.071  | 9.436  | 9.518  | 11747 | ANXA5   | NM_009673_3_-1  |
| Anxa7   | 1.548  | 1.123  | 3.750  | 2.005  | 1.362  | 0.403  | 0.369  | -0.671 | 2.452  | -0.080 | 11750 | ANXA7   | NM_009674_14_-1 |
| Ap1g1   | 0.583  | 0.451  | 0.952  | 1.525  | 0.547  | 0.968  | 1.099  | 0.460  | 1.329  | -0.505 | 11765 | AP1G1   | NM_009677_8_+1  |
| Ap1m2   | 3.304  | 3.066  | -2.565 | -3.781 | -0.530 | -0.758 | -1.744 | -2.588 | -0.629 | -1.365 | 11768 | AP1M2   | NM_009678_9_-1  |
| Ap2m1   | -0.247 | 0.845  | 0.937  | 1.323  | 0.858  | 0.557  | 0.590  | 0.802  | 1.347  | 1.484  | 11773 | AP2M1   | NM_009679_16_+1 |
| Ap3b1   | 5.555  | 5.745  | 6.600  | 6.692  | 6.264  | 6.275  | 6.163  | 6.262  | 6.486  | 6.697  | 11774 | AP3B1   | NM_009680_13_+1 |
| Ap3s1   | 6.209  | 6.872  | 7.191  | 7.283  | 5.599  | 5.472  | 6.422  | 6.408  | 6.387  | 7.052  | 11777 | AP3S1   | NM_009681_18_+1 |
| Ap3s2   | 4.798  | 4.477  | 4.260  | 4.271  | 4.843  | 4.598  | 4.895  | 4.352  | 4.332  | 4.152  | 11778 | AP3S2   | NM_009682_7_-1  |
| Apaf1   | 2.870  | 3.181  | 4.493  | 4.682  | 4.018  | 3.882  | 3.941  | 4.620  | 5.313  | 5.967  | 11783 | APAF1   | NM_009684_10_-1 |
| Apbb1   | -4.981 | -4.981 | -2.790 | -3.026 | -1.539 | -2.294 | -1.741 | -0.827 | 1.320  | 1.494  | 11785 | APBB1   | NM_009685_7_-1  |
| Apbb2   | -3.038 | -1.697 | -4.128 | -4.052 | -4.952 | -4.868 | -4.964 | -4.951 | -4.527 | -4.616 | 11787 | APBB2   | NM_009686_5_-1  |
| Apex1   | 5.987  | 5.503  | 5.899  | 5.879  | 5.943  | 5.761  | 5.742  | 5.321  | 3.761  | 2.706  | 11792 | APEX1   | NM_009687_14_+1 |
| Xiap    | 2.627  | 3.095  | 3.555  | 2.907  | 3.844  | 2.885  | 4.126  | 3.070  | 3.088  | 2.998  | 11798 | XIAP    | NM_009688_X_+1  |
| Birc5   | 1.002  | 1.751  | 5.068  | 5.472  | 5.802  | 5.568  | 5.132  | 4.892  | 3.056  | 2.453  | 11799 | BIRC5   | NM_009689_11_+1 |
| Cd5l    | 4.490  | 1.831  | 3.299  | 2.821  | 4.195  | 2.742  | 3.699  | 3.999  | 2.087  | 1.448  | 11801 | CD5L    | NM_009690_3_+1  |
| Aplp2   | 2.271  | 3.853  | 2.643  | 2.807  | 3.518  | 3.565  | 4.289  | 4.310  | 3.145  | 2.716  | 11804 | APLP2   | NM_009691_9_-1  |
| Apobec2 | -0.462 | -3.315 | -2.440 | -4.376 | -3.778 | -3.938 | -2.682 | -3.698 | -4.394 | -4.981 | 11811 | APOBEC2 | NM_009694_17_-1 |
| Apoe    | 8.290  | 3.652  | 7.933  | 3.979  | 7.832  | 4.752  | 9.799  | 8.371  | 11.639 | 8.227  | 11816 | APOE    | NM_009696_7_-1  |
| Nr2f2   | -3.722 | -3.900 | -4.964 | -4.887 | -4.921 | -4.976 | -4.853 | -4.440 | -4.981 | -4.981 | 11819 | NR2F2   | NM_009697_7_-1  |
| Aprt    | 6.014  | 5.859  | 5.861  | 5.793  | 5.322  | 5.479  | 5.743  | 6.194  | 7.635  | 7.310  | 11821 | APRT    | NM_009698_8_-1  |
| Aqp4    | -4.981 | -4.981 | -4.555 | -4.946 | -4.973 | -3.920 | -4.931 | -4.809 | -4.981 | -4.981 | 11829 | AQP4    | NM_009700_18_-1 |
| Aqr     | 4.926  | 4.374  | 5.531  | 4.990  | 6.315  | 6.020  | 6.030  | 5.635  | 5.693  | 5.643  | 11834 | AQR     | NM_009702_2_-1  |
| Araf    | 6.338  | 6.355  | 5.588  | 5.717  | 5.996  | 6.141  | 5.625  | 5.862  | 5.486  | 5.339  | 11836 | ARAF    | NM_009703_X_+1  |
| Areg    | 2.929  | 3.458  | -1.969 | -3.068 | -0.743 | -2.799 | -0.856 | -0.748 | -0.690 | -1.131 | 11839 | AREG    | NM_009704_5_+1  |
| Arg2    | -2.620 | -1.475 | 0.854  | 1.889  | -0.516 | 0.354  | -1.049 | 1.062  | -0.273 | 2.034  | 11847 | ARG2    | NM_009705_12_+1 |
| Arhgap5 | 5.156  | 5.288  | 6.304  | 5.913  | 4.608  | 4.501  | 4.401  | 4.372  | 2.747  | 3.034  | 11855 | ARHGAP5 | NM_009706_12_+1 |
| Arhgap6 | -4.981 | -2.470 | -4.981 | -4.981 | -4.957 | -3.285 | -4.959 | -4.943 | -4.981 | -4.981 | 11856 | ARHGAP6 | NM_009707_X_+1  |
| Rnd2    | -0.157 | -1.156 | -1.904 | -1.670 | -2.996 | -2.848 | -2.765 | -3.151 | -2.712 | -3.386 | 11858 | RND2    | NM_009708_11_+1 |
| Arnt    | 1.365  | 3.066  | 2.980  | 3.021  | 3.046  | 3.038  | 3.518  | 3.744  | 4.602  | 4.859  | 11863 | ARNT    | NM_009709_3_+1  |
| Art1    | -2.739 | 0.237  | -4.980 | -4.699 | -2.359 | -3.070 | -4.981 | -4.981 | -4.981 | -4.981 | 11870 | ART1    | NM_009710_7_+1  |
| Arsb    | 4.298  | 4.305  | 7.208  | 7.127  | 4.484  | 4.640  | 5.061  | 5.328  | 4.954  | 4.358  | 11881 | ARSB    | NM_009712_13_+1 |
| Arsa    | 4.324  | 4.805  | 4.029  | 3.898  | 3.957  | 4.207  | 4.190  | 4.522  | 5.260  | 5.457  | 11883 | ARSA    | NM_009713_15_-1 |
| Atf2    | 0.762  | -1.237 | -0.831 | -4.513 | -3.060 | -1.432 | 0.347  | -2.339 | -1.220 | -0.773 | 11909 | ATF2    | NM_009715_2_-1  |
| Atf4    | 6.161  | 5.869  | 5.290  | 5.169  | 5.278  | 5.360  | 5.056  | 5.223  | 4.977  | 4.742  | 11911 | ATF4    | NM_009716_15_+1 |
| Atox1   | 7.131  | 6.835  | 10.013 | 9.536  | 9.656  | 9.248  | 9.851  | 9.207  | 7.911  | 7.622  | 11927 | ATOX1   | NM_009720_11_-1 |
| Atp1b1  | 9.595  | 9.814  | 1.553  | 2.488  | 1.376  | 3.029  | 2.404  | 4.099  | -0.810 | -1.373 | 11931 | ATP1B1  | NM_009721_1_-1  |
| Atp2a2  | -1.354 | -1.416 | -1.828 | 0.292  | -0.258 | -0.603 | -2.415 | -0.624 | 2.599  | 2.048  | 11938 | ATP2A2  | NM_009722_5_-1  |
| Atp2b2  | -4.981 | -3.003 | -3.973 | -4.470 | -4.449 | -4.804 | -4.407 | -4.908 | -4.519 | -4.981 | 11941 | ATP2B2  | NM_009723_6_-1  |
| Atp5f1  | 9.197  | 9.219  | 9.114  | 9.106  | 8.855  | 8.768  | 8.685  | 8.604  | 8.193  | 8.283  | 11950 | ATP5F1  | NM_009725_3_-1  |
| Atp7a   | 3.865  | 3.699  | 4.352  | 4.478  | 4.202  | 3.698  | 4.364  | 4.481  | 5.432  | 5.695  | 11977 | ATP7A   | NM_009726_X_+1  |
| Atp8a1  | 5.381  | 5.461  | 6.305  | 6.241  | 5.411  | 5.600  | 4.853  | 5.519  | 5.566  | 5.905  | 11980 | ATP8A1  | NM_009727_5_-1  |
| Atp10a  | -0.021 | 0.363  | 2.157  | -1.694 | 0.526  | -2.262 | 1.660  | 0.363  | 4.036  | 3.218  | 11982 | ATP10A  | NM_009728_7_+1  |
| Atp6v0c | 8.643  | 7.958  | 7.933  | 7.207  | 8.432  | 7.657  | 8.449  | 7.718  | 8.641  | 7.654  | 11984 | ATP6V0C | NM_009729_17_-1 |
| Atrn    | 3.389  | 3.605  | 3.348  | 3.197  | 3.550  | 3.482  | 3.872  | 3.470  | 4.362  | 4.306  | 11990 | ATRNR   | NM_009730_2_+1  |
| Akr1b7  | 0.680  | -2.353 | -0.912 | -1.244 | 0.164  | -1.699 | -0.110 | -1.587 | -4.981 | -2.988 | 11997 | NA      | NM_009731_6_+1  |
| Axin1   | 2.704  | 3.067  | 3.795  | 3.172  | 3.659  | 3.648  | 3.525  | 3.860  | 3.902  | 4.158  | 12005 | AXIN1   | NM_009733_17_+1 |
| Cep131  | 2.114  | 2.519  | 1.905  | 2.117  | 2.070  | 2.708  | 1.652  | 1.624  | 2.947  | 2.903  | 12009 | CEP131  | NM_009734_11_-1 |
| B2m     | 13.697 | 13.784 | 12.259 | 12.071 | 12.952 | 12.806 | 12.954 | 12.504 | 12.466 | 11.908 | 12010 | B2M     | NM_009735_2_+1  |
| Bag1    | 6.361  | 6.448  | 6.250  | 6.363  | 5.820  | 5.879  | 5.971  | 6.058  | 5.778  | 5.730  | 12017 | BAG1    | NM_009736_4_-1  |
| Bcat2   | 5.497  | 5.596  | 6.395  | 6.810  | 6.277  | 6.529  | 6.548  | 6.666  | 5.024  | 5.354  | 12036 | BCAT2   | NM_009737_7_+1  |
| Bckdk   | 6.832  | 6.649  | 5.883  | 6.212  | 6.096  | 6.160  | 5.795  | 6.079  | 5.631  | 5.449  | 12041 | BCKDK   | NM_009739_7_+1  |
| Bcl10   | 6.407  | 6.445  | 6.263  | 6.305  | 6.596  | 6.851  | 6.612  | 6.767  | 7.463  | 7.482  | 12042 | BCL10   | NM_009740_3_+1  |
| Bcl2    | 1.812  | 1.808  | 2.334  | 3.108  | 2.476  | 2.635  | 5.386  | 4.533  | 5.380  | 3.329  | 12043 | BCL2    | NM_009741_1_-1  |
| Bcl2a1a | 3.024  | 1.438  | 8.710  | 8.681  | 8.244  | 8.581  | 8.344  | 8.205  | 3.846  | 5.405  | 12044 | BCL2A1  | NM_009742_9_+1  |
| Bcl2l1  | 2.142  | 2.753  | 3.523  | 3.771  | 3.352  | 3.317  | 2.561  | 3.354  | 4.482  | 4.197  | 12048 | BCL2L1  | NM_009743_2_-1  |
| Bcl6    | 2.363  | 2.201  | 5.898  | 5.270  | 5.498  | 5.249  | 5.999  | 5.964  | 6.547  | 6.705  | 12053 | BCL6    | NM_009744_16_-1 |

|          |        |        |        |        |        |        |        |        |        |        |       |          |                 |
|----------|--------|--------|--------|--------|--------|--------|--------|--------|--------|--------|-------|----------|-----------------|
| Bcl7b    | 5.779  | 5.957  | 5.157  | 5.309  | 5.282  | 5.194  | 5.332  | 5.411  | 5.425  | 5.289  | 12054 | BCL7B    | NM_009745_5_+1  |
| Bcl7c    | 6.659  | 6.611  | 5.338  | 5.451  | 4.798  | 4.804  | 4.816  | 4.981  | 3.672  | 3.769  | 12055 | BCL7C    | NM_009746_7_-1  |
| Bdkrb2   | -3.563 | -4.981 | -1.357 | -1.861 | -2.759 | -3.535 | -3.746 | -4.209 | -4.981 | -4.981 | 12062 | BDKRB2   | NM_009747_12_+1 |
| Bet1     | 6.940  | 6.725  | 5.091  | 5.188  | 4.812  | 4.870  | 5.327  | 5.383  | 4.766  | 5.667  | 12068 | BET1     | NM_009748_6_-1  |
| Bex2     | -4.981 | -4.981 | -4.957 | -1.854 | -2.761 | -1.574 | -4.070 | -4.079 | -4.981 | -3.758 | 12069 | BEX1     | NM_009749_X_-1  |
| Bex3     | 6.390  | 6.275  | 5.556  | 5.897  | 6.003  | 6.145  | 5.320  | 5.308  | 2.516  | 2.761  | 12070 | BEX3     | NM_009750_X_+1  |
| Bfsp1    | -3.272 | -4.981 | -3.476 | -4.176 | -3.901 | -3.425 | -2.185 | -1.874 | 2.982  | 2.576  | 12075 | BFSP1    | NM_009751_2_-1  |
| Glb1     | 5.131  | 3.994  | 4.856  | 3.694  | 4.513  | 3.076  | 4.448  | 2.662  | 5.172  | 3.741  | 12091 | GLB1     | NM_009752_9_+1  |
| Bicd1    | -1.109 | -0.699 | -2.936 | -1.950 | -0.819 | -3.415 | -2.678 | -1.259 | -4.530 | -3.093 | 12121 | BICD1    | NM_009753_6_+1  |
| Bcl2l11  | -2.907 | -3.861 | 1.375  | -0.786 | -1.816 | -0.690 | -2.281 | -1.316 | 0.274  | -0.631 | 12125 | BCL2L11  | NM_009754_2_+1  |
| Bmp1     | -4.981 | -1.212 | -0.175 | 0.884  | 1.174  | 1.539  | -0.382 | 0.501  | -2.753 | -1.734 | 12153 | BMP1     | NM_009755_14_-1 |
| Bmp10    | -4.981 | -4.981 | -4.925 | -4.925 | -4.917 | -4.917 | -4.788 | -4.606 | -4.981 | -4.981 | 12154 | BMP10    | NM_009756_6_+1  |
| Bmpr1a   | -2.178 | -2.349 | -3.602 | -2.148 | -2.453 | 0.553  | -2.616 | -2.234 | -4.394 | -1.813 | 12166 | BMPR1A   | NM_009758_14_-1 |
| Bmx      | -3.843 | -4.981 | -4.945 | -2.472 | -1.999 | -2.208 | 1.632  | 1.074  | 5.307  | 4.764  | 12169 | BMX      | NM_009759_X_-1  |
| Bnip3    | 5.601  | 6.177  | 4.535  | 4.968  | 3.769  | 4.274  | 4.672  | 4.772  | 5.060  | 5.096  | 12176 | BNIP3    | NM_009760_7_-1  |
| Bnip3l   | 8.025  | 8.225  | 7.389  | 7.574  | 7.337  | 7.700  | 7.688  | 7.964  | 8.530  | 8.567  | 12177 | BNIP3L   | NM_009761_14_-1 |
| Smyd1    | -0.511 | -4.981 | -0.288 | -3.281 | -4.929 | -4.911 | -4.112 | -4.983 | -4.981 | -4.462 | 12180 | SMYD1    | NM_009762_6_-1  |
| Bst1     | 3.630  | 3.382  | 4.825  | 5.071  | -2.238 | -0.917 | 0.811  | 2.407  | 4.475  | 4.950  | 12182 | BST1     | NM_009763_5_+1  |
| Brcal    | 0.485  | -0.066 | 1.837  | 1.894  | 2.613  | 2.042  | 1.500  | 1.378  | 0.280  | -0.289 | 12189 | BRCA1    | NM_009764_11_-1 |
| Brcal    | 1.364  | 1.975  | 1.519  | 1.572  | 2.787  | 2.364  | 1.905  | 1.918  | 1.658  | 1.361  | 12190 | BRCA2    | NM_009765_5_+1  |
| Chic1    | 0.312  | 2.162  | -2.599 | 2.091  | 0.670  | 3.747  | 0.242  | 2.161  | -2.263 | 1.671  | 12212 | CHIC1    | NM_009767_X_+1  |
| Bsg      | 2.891  | 3.384  | 1.714  | 1.798  | 0.383  | 1.227  | 0.613  | 0.948  | 1.257  | 1.274  | 12215 | BSG      | NM_009768_10_+1 |
| Klf5     | -4.981 | -2.160 | -0.933 | -0.167 | -2.191 | -1.309 | 0.020  | -0.575 | 0.317  | -3.480 | 12224 | KLF5     | NM_009769_14_+1 |
| Btg3     | 3.993  | 4.293  | 1.547  | 1.168  | 2.019  | 2.333  | 1.688  | 1.415  | 1.232  | 1.680  | 12228 | BTG3     | NM_009770_16_-1 |
| Btrc     | 5.170  | 3.333  | 1.430  | 1.277  | 1.808  | 1.303  | -0.652 | 0.477  | 1.545  | 2.670  | 12234 | BTRC     | NM_009771_19_+1 |
| Bub1     | -2.347 | -4.981 | 2.670  | 2.631  | 2.689  | 1.740  | 1.996  | 1.285  | 0.304  | 1.059  | 12235 | BUB1     | NM_009772_2_-1  |
| Bub1b    | 1.206  | -1.055 | 3.968  | 3.712  | 4.696  | 2.705  | 4.687  | 2.301  | 3.717  | 1.982  | 12236 | BUB1B    | NM_009773_2_+1  |
| Bub3     | 7.197  | 7.337  | 7.013  | 7.106  | 7.392  | 7.249  | 7.232  | 7.155  | 6.890  | 6.708  | 12237 | BUB3     | NM_009774_7_+1  |
| Tspo     | 8.659  | 8.436  | 7.676  | 7.517  | 6.536  | 6.728  | 7.718  | 7.729  | 8.320  | 7.993  | 12257 | TSPO     | NM_009775_15_+1 |
| Serping1 | -2.686 | -0.468 | -4.542 | -2.179 | -4.497 | -4.482 | -4.459 | -3.701 | -4.981 | -4.981 | 12258 | SERPING1 | NM_009776_2_-1  |
| C1qb     | 6.874  | 4.303  | 5.261  | 5.227  | 6.717  | 5.729  | 7.039  | 7.522  | 3.607  | 2.585  | 12260 | C1QB     | NM_009777_4_-1  |
| C3       | 0.463  | -1.842 | 0.627  | 1.396  | 0.477  | 1.105  | 5.343  | 6.115  | 9.918  | 9.804  | 12266 | C3       | NM_009778_17_-1 |
| C3ar1    | -1.798 | -1.291 | -1.650 | -4.835 | -2.981 | -3.740 | 2.196  | 2.708  | 2.595  | 3.422  | 12267 | C3AR1    | NM_009779_6_-1  |
| C4b      | -0.610 | -1.814 | -1.972 | -4.152 | -2.063 | -2.682 | -1.465 | -1.537 | 2.024  | 2.417  | 12268 | C4A C4B  | NM_009780_17_-1 |
| Cacna1c  | -3.966 | -3.446 | -4.644 | -4.390 | -4.370 | -4.199 | -4.536 | -4.619 | -4.981 | -3.658 | 12288 | CACNA1C  | NM_009781_6_-1  |
| Cacna1e  | 5.205  | 5.173  | 4.626  | 4.413  | 1.953  | 3.327  | 0.503  | 1.593  | -3.373 | -1.845 | 12290 | CACNA1E  | NM_009782_1_-1  |
| Cacna1g  | -4.981 | -4.981 | -4.954 | -4.614 | -4.228 | -2.556 | -4.955 | -4.943 | -4.981 | -4.981 | 12291 | CACNA1G  | NM_009783_11_-1 |
| Cacybp   | 6.851  | 6.879  | 7.395  | 7.502  | 7.009  | 6.802  | 6.834  | 6.936  | 5.850  | 6.468  | 12301 | CACYBP   | NM_009786_1_-1  |
| Pdia4    | 7.384  | 7.605  | 6.799  | 7.409  | 5.798  | 6.526  | 6.258  | 7.907  | 6.204  | 7.178  | 12304 | PDIA4    | NM_009787_6_-1  |
| S100g    | -4.981 | -4.981 | -4.647 | -4.832 | -3.024 | -3.607 | -3.380 | -3.811 | -4.981 | -3.098 | 12309 | S100G    | NM_009789_X_-1  |
| Calm1    | 10.505 | 10.702 | 11.889 | 11.725 | 10.923 | 10.745 | 11.111 | 11.262 | 10.316 | 10.331 | 12313 | NA       | NM_009790_12_+1 |
| Aspm     | 0.827  | 1.025  | 1.617  | 2.543  | 3.259  | 2.847  | 3.131  | 2.052  | 1.034  | 1.016  | 12316 | ASPM     | NM_009791_1_+1  |
| Camk2a   | -1.024 | -2.919 | -3.888 | -4.900 | -1.810 | -3.187 | -1.546 | -4.736 | -4.977 | -4.142 | 12322 | CAMK2A   | NM_009792_18_+1 |
| Camk4    | -0.722 | 0.022  | -0.601 | -0.086 | -1.511 | -0.215 | -0.744 | 0.865  | -0.564 | 0.934  | 12326 | CAMK4    | NM_009793_18_+1 |
| Capn2    | 5.348  | 5.604  | 5.390  | 5.232  | 4.661  | 4.805  | 5.567  | 6.172  | 8.025  | 8.201  | 12334 | CAPN2    | NM_009794_1_-1  |
| Capns1   | 6.129  | 6.093  | 6.106  | 6.139  | 5.639  | 5.617  | 6.261  | 6.234  | 6.504  | 6.427  | 12336 | CAPNS1   | NM_009795_7_-1  |
| Capn7    | 5.380  | 5.474  | 5.960  | 5.876  | 5.288  | 5.195  | 5.286  | 5.498  | 5.618  | 6.122  | 12339 | CAPN7    | NM_009796_14_+1 |
| Capza1   | 7.766  | 7.808  | 8.610  | 8.764  | 8.581  | 8.556  | 8.506  | 8.681  | 9.229  | 9.386  | 12340 | CAPZA1   | NM_009797_3_-1  |
| Capzb    | 9.819  | 9.728  | 10.031 | 10.063 | 10.106 | 10.073 | 9.895  | 10.000 | 10.017 | 9.931  | 12345 | CAPZB    | NM_009798_4_+1  |
| Car1     | -3.654 | 3.873  | 0.353  | 6.572  | 3.187  | 6.739  | 2.064  | 7.475  | 1.528  | 4.131  | 12346 | CA1      | NM_009799_3_-1  |
| Car11    | -1.714 | -4.981 | -3.638 | -2.859 | -0.412 | 1.466  | -1.833 | -1.911 | -3.491 | -4.316 | 12348 | CA11     | NM_009800_7_+1  |
| Car2     | 1.271  | 5.199  | 3.006  | 6.957  | 5.317  | 7.740  | 4.720  | 7.923  | 2.325  | 4.510  | 12349 | CA2      | NM_009801_3_+1  |
| Car6     | -4.981 | -4.981 | -4.172 | -4.394 | -4.107 | -2.314 | -2.718 | -4.526 | -2.957 | -3.758 | 12353 | CA6      | NM_009802_4_-1  |
| Cat      | 7.376  | 7.959  | 8.354  | 8.495  | 7.672  | 8.010  | 7.304  | 7.490  | 7.171  | 7.224  | 12359 | CAT      | NM_009804_2_-1  |
| Cflar    | 3.445  | 3.618  | 3.880  | 4.190  | 4.924  | 4.801  | 4.321  | 3.992  | 3.140  | 3.399  | 12633 | CFLAR    | NM_009805_1_+1  |
| Cask     | -0.609 | 1.101  | 2.033  | 2.322  | 2.268  | 0.907  | 3.278  | 2.383  | 3.867  | 3.671  | 12361 | CASK     | NM_009806_X_-1  |
| Casp1    | 6.363  | 6.638  | 5.673  | 6.018  | 6.939  | 6.790  | 6.998  | 6.935  | 7.035  | 7.007  | 12362 | CASP1    | NM_009807_9_+1  |
| Casp12   | -0.802 | -2.997 | -3.307 | -3.364 | -4.990 | -3.913 | -2.686 | -1.022 | -0.045 | 1.867  | 12364 | NA       | NM_009808_9_+1  |
| Casp3    | 2.272  | 0.846  | 3.190  | 3.678  | 2.383  | 1.618  | 2.123  | 2.461  | 3.965  | 3.925  | 12367 | CASP3    | NM_009810_8_+1  |
| Casp6    | 6.387  | 6.119  | 7.696  | 7.409  | 5.579  | 5.251  | 6.115  | 5.983  | 5.154  | 5.464  | 12368 | CASP6    | NM_009811_3_+1  |
| Casp8    | 5.510  | 5.767  | 5.695  | 5.566  | 6.018  | 5.655  | 6.090  | 6.106  | 6.264  | 6.240  | 12370 | CASP8    | NM_009812_1_+1  |
| Cast     | 5.230  | 5.280  | 5.284  | 4.871  | 4.698  | 3.631  | 5.579  | 5.477  | 6.894  | 7.024  | 12380 | CAST     | NM_009817_13_-1 |
| Ctnna1   | 6.080  | 6.266  | 7.219  | 7.075  | 6.241  | 6.033  | 6.719  | 6.672  | 6.543  | 6.710  | 12385 | CTNNA1   | NM_009818_18_+1 |
| Runx2    | 6.942  | 6.640  | 1.131  | 1.650  | 2.523  | 2.744  | 1.495  | 0.217  | 0.878  | 2.587  | 12393 | RUNX2    | NM_009820_17_-1 |
| Runx1    | 1.828  | 3.117  | 1.834  | 1.406  | 1.875  | 2.666  | 2.973  | 3.044  | 3.663  | 3.543  | 12394 | RUNX1    | NM_009821_16_-1 |
| Runx1t1  | -4.981 | -0.708 | -4.945 | -4.945 | -3.760 | -3.045 | -4.968 | -4.009 | -4.981 | -3.515 | 12395 | RUNX1T1  | NM_009822_4_+1  |
| Cbfa2t2  | 1.561  | 1.838  | 1.404  | 1.856  | 2.536  | 2.844  | 0.718  | 0.260  | 1.942  | 1.227  | 12396 | CBFA2T2  | NM_009823_2_+1  |
| Cbfa2t3  | 4.958  | 5.351  | 6.905  | 7.024  | 7.328  | 7.520  | 7.032  | 6.761  | 5.860  | 5.363  | 12398 | CBFA2T3  | NM_009824_8_-1  |
| Serpinh1 | -4.347 | 0.412  | -4.789 | -4.965 | -4.975 | -4.973 | -4.928 | -4.960 | -4.947 | -4.981 | 12406 | SERPINH1 | NM_009825_7_-1  |
| Rb1cc1   | 5.186  | 5.139  | 5.271  | 5.140  | 5.341  | 5.331  | 5.449  | 5.418  | 5.875  | 6.408  | 12421 | RB1CC1   | NM_009826_1_+1  |
| Cckar    | -4.981 | -4.981 | -4.815 | -4.963 | -4.513 | -4.794 | -4.941 | -4.887 | -4.981 | -4.981 | 12425 | CCKAR    | NM_009827_5_-1  |
| Ccna2    | 1.968  | 1.915  | 4.587  | 5.294  | 5.529  | 5.175  | 5.003  | 5.022  | 3.368  | 3.109  | 12428 | CCNA2    | NM_009828_3_-1  |
| Ccnd2    | 4.371  | 3.576  | 3.789  | 4.723  | 7.188  | 6.027  | 5.908  | 5.525  | 1.765  | 0.540  | 12444 | CCND2    | NM_009829_6_-1  |
| Ccne2    | -3.412 | -0.550 | -0.318 | -1.078 | -0.225 | -1.303 | -1.551 | -1.751 | -4.849 | -0.509 | 12448 | CCNE2    | NM_009830_4_+1  |

|        |        |        |        |        |        |        |        |        |        |        |        |               |                 |
|--------|--------|--------|--------|--------|--------|--------|--------|--------|--------|--------|--------|---------------|-----------------|
| Ccng1  | 5.837  | 6.127  | 6.362  | 6.707  | 6.362  | 6.427  | 6.289  | 6.451  | 6.328  | 6.931  | 12450  | CCNG1         | NM_009831_11_-1 |
| Ccnk   | 2.648  | 2.593  | 2.913  | 2.799  | 2.875  | 2.612  | 3.227  | 2.521  | 2.018  | 2.490  | 12454  | CCNK          | NM_009832_12_+1 |
| Ccnt1  | 4.772  | 4.777  | 4.976  | 5.095  | 5.441  | 5.487  | 5.003  | 5.048  | 5.083  | 5.073  | 12455  | CCNT1         | NM_009833_15_-1 |
| Noct   | 0.914  | 1.130  | 0.908  | 1.480  | 1.683  | 1.487  | 2.798  | 3.175  | 4.401  | 4.410  | 12457  | NOCT          | NM_009834_3_+1  |
| Ccr6   | -0.884 | -0.060 | -3.649 | -1.813 | 4.230  | 2.978  | 1.900  | 1.718  | -3.309 | -4.981 | 12458  | CCR6          | NM_009835_17_+1 |
| Cct3   | 7.557  | 7.746  | 7.837  | 7.972  | 7.484  | 7.438  | 7.173  | 7.393  | 6.207  | 6.280  | 12462  | CCT3          | NM_009836_3_+1  |
| Cct4   | 6.904  | 7.153  | 7.560  | 7.734  | 7.105  | 7.129  | 7.217  | 7.336  | 6.903  | 7.210  | 12464  | CCT4          | NM_009837_11_+1 |
| Cct6a  | 6.999  | 6.956  | 7.692  | 7.827  | 7.473  | 7.337  | 7.222  | 7.336  | 6.752  | 6.747  | 12466  | CCT6A         | NM_009838_5_+1  |
| Cct6b  | -0.563 | -0.824 | -0.638 | -1.212 | -1.564 | -1.903 | -1.392 | -2.647 | -2.439 | -1.752 | 12467  | CCT6B         | NM_009839_11_-1 |
| Cct8   | 7.912  | 8.069  | 8.481  | 8.666  | 8.173  | 8.120  | 8.013  | 8.166  | 7.609  | 7.699  | 12469  | CCT8          | NM_009840_16_-1 |
| Cd14   | 3.828  | 6.295  | 4.387  | 4.629  | 2.968  | 4.073  | 5.335  | 7.379  | 8.471  | 9.474  | 12475  | CD14          | NM_009841_18_-1 |
| Cd151  | -4.512 | 0.564  | -0.762 | -1.918 | -0.821 | 0.329  | 0.172  | 0.099  | 0.393  | 0.977  | 12476  | CD151         | NM_009842_7_+1  |
| Ctla4  | 2.075  | 0.977  | 2.754  | 1.527  | -4.725 | -1.100 | 1.396  | 2.366  | -4.981 | -4.848 | 12477  | CTLA4         | NM_009843_1_+1  |
| Cd19   | 1.520  | -1.789 | -0.112 | 3.761  | 2.198  | 5.572  | 3.284  | 7.084  | 0.684  | 1.997  | 12478  | CD19          | NM_009844_7_-1  |
| Cd22   | -0.983 | -1.426 | 0.326  | -0.606 | 1.237  | -1.033 | 0.943  | -1.315 | 0.397  | -2.128 | 12483  | CD22          | NM_009845_7_-1  |
| Cd24a  | 6.510  | 7.291  | 8.677  | 8.925  | 4.908  | 7.018  | 4.379  | 7.913  | 4.527  | 4.053  | 12484  | NA            | NM_009846_10_+1 |
| Cd2ap  | 6.186  | 6.318  | 7.315  | 7.060  | 6.171  | 6.131  | 6.628  | 6.815  | 6.450  | 7.052  | 12488  | CD2AP         | NM_009847_17_-1 |
| Entpd1 | 4.933  | 5.229  | 5.832  | 5.887  | 5.900  | 6.013  | 5.695  | 6.018  | 5.181  | 5.589  | 12495  | ENTPD1        | NM_009848_19_+1 |
| Entpd2 | -4.981 | -4.981 | -3.582 | -3.722 | -4.959 | -4.959 | -4.976 | -4.970 | -3.373 | -4.981 | 12496  | ENTPD2        | NM_009849_2_+1  |
| Cd3g   | 1.377  | 1.774  | -1.766 | 2.105  | 0.537  | 3.493  | 1.427  | 4.553  | -0.963 | 0.312  | 12502  | CD3G          | NM_009850_9_-1  |
| Cd44   | 0.713  | 0.093  | 0.365  | -1.039 | -2.652 | -2.702 | -1.604 | -0.612 | -0.500 | 0.298  | 12505  | CD44          | NM_009851_2_-1  |
| Cd6    | -1.845 | -1.454 | -0.287 | 1.218  | -0.753 | 2.136  | 0.205  | 3.346  | -0.770 | -1.450 | 12511  | CD6           | NM_009852_19_-1 |
| Cd7    | 9.926  | 10.388 | 6.271  | 5.409  | 9.305  | 9.572  | 7.757  | 6.871  | 2.946  | 0.473  | 12516  | CD7           | NM_009854_11_-1 |
| Cd80   | -0.190 | -2.895 | 4.386  | 4.160  | 5.191  | 4.976  | 4.131  | 3.597  | 2.488  | 2.643  | 12519  | CD80          | NM_009855_16_+1 |
| Cd83   | 4.972  | 3.190  | 10.303 | 10.109 | 10.398 | 10.068 | 9.416  | 9.160  | 5.556  | 5.080  | 12522  | CD83          | NM_009856_13_+1 |
| Cd8a   | 6.737  | 5.332  | 8.645  | 8.565  | -0.033 | -0.150 | 0.756  | 2.439  | -4.878 | -4.975 | 12525  | CD8A          | NM_009857_6_+1  |
| Cd8b1  | 9.879  | 4.991  | 4.245  | 2.828  | -0.812 | 1.240  | 0.443  | 2.441  | -1.005 | -0.385 | 12526  | CD8B          | NM_009858_6_+1  |
| Sept7  | 6.950  | 6.994  | 7.123  | 7.176  | 6.986  | 6.830  | 6.883  | 6.920  | 6.614  | 7.046  | 235072 | SEPT7         | NM_009859_9_+1  |
| Cdc25c | -4.981 | -4.981 | 0.673  | 1.163  | 1.655  | 0.713  | 1.172  | -0.334 | 0.341  | -0.206 | 12532  | CDC25C        | NM_009860_18_-1 |
| Cdc42  | 9.671  | 10.059 | 10.526 | 10.525 | 10.558 | 10.541 | 10.456 | 10.512 | 10.495 | 10.734 | 12540  | NA            | NM_009861_4_-1  |
| Cdc45  | 1.677  | 0.378  | 3.421  | 3.289  | 3.851  | 3.257  | 3.008  | 3.047  | 2.434  | 1.781  | 12544  | CDC45         | NM_009862_16_-1 |
| Cdc7   | 1.854  | 3.074  | 2.577  | 2.283  | 3.686  | 3.738  | 2.618  | 2.142  | 1.005  | 0.100  | 12545  | CD7           | NM_009863_5_+1  |
| Cdh1   | 6.538  | 6.297  | -0.585 | -0.823 | -3.291 | -0.215 | 2.185  | -0.005 | 0.244  | -1.904 | 12550  | CDH1          | NM_009864_8_+1  |
| Cdh11  | -1.945 | -4.981 | -1.381 | -4.774 | -1.842 | -4.263 | -1.740 | -4.816 | -1.641 | -4.316 | 12552  | CDH11         | NM_009866_8_-1  |
| Cdh5   | 5.004  | 4.265  | -1.198 | -1.449 | -1.701 | -2.154 | -2.649 | -1.896 | -2.724 | -2.236 | 12562  | CDH5          | NM_009868_8_+1  |
| Cdk4   | 7.304  | 7.191  | 6.963  | 7.252  | 7.430  | 7.455  | 6.864  | 7.038  | 6.130  | 6.051  | 12567  | CDK4          | NM_009870_10_+1 |
| Cdk5r1 | 0.426  | 0.527  | 0.514  | 0.548  | -0.181 | -0.782 | -0.559 | -1.385 | -1.953 | -0.977 | 12569  | CDK5R1        | NM_009871_11_+1 |
| Cdk6   | 3.489  | 3.693  | 2.723  | 3.188  | 3.185  | 3.712  | 2.679  | 3.211  | 2.494  | 2.287  | 12571  | CDK6          | NM_009873_5_+1  |
| Cdk7   | 6.352  | 6.232  | 5.745  | 5.805  | 5.702  | 5.862  | 5.332  | 5.464  | 5.015  | 5.039  | 12572  | CDK7          | NM_009874_13_-1 |
| Cdkn1b | 4.674  | 4.600  | 4.631  | 4.720  | 5.331  | 5.831  | 4.426  | 4.218  | 3.018  | 2.902  | 12576  | CDKN1B        | NM_009875_6_+1  |
| Cdkn1c | -1.785 | -1.322 | -0.725 | -1.124 | -1.715 | -2.217 | -0.659 | -0.985 | 0.356  | -0.520 | 12577  | NA            | NM_009876_7_-1  |
| Cdkn2a | -4.981 | -4.981 | -4.975 | -3.245 | -1.648 | -2.539 | -4.918 | -4.876 | -4.981 | -4.981 | 12578  | CDKN2A        | NM_009877_4_-1  |
| Cdkn2d | 8.089  | 7.953  | 4.338  | 3.787  | 5.052  | 4.513  | 5.406  | 5.124  | 7.329  | 6.369  | 12581  | CDKN2D        | NM_009878_9_-1  |
| Ift81  | 2.163  | 2.987  | 0.260  | 0.825  | -0.507 | 1.407  | -0.715 | 0.335  | 2.316  | 1.786  | 12589  | IFT81         | NM_009879_5_-1  |
| Cdx1   | -4.981 | -4.981 | -3.773 | -3.071 | -4.444 | -3.113 | -3.901 | -4.521 | -4.981 | -4.981 | 12590  | CDX1          | NM_009880_18_-1 |
| Cdyl   | 1.831  | 1.345  | -0.608 | -0.482 | -0.837 | -0.863 | -3.886 | -0.848 | 0.638  | 0.187  | 12593  | CDYL          | NM_009881_13_+1 |
| Cebpb  | 4.252  | 3.498  | 0.954  | 2.089  | 3.456  | 4.215  | 7.092  | 7.183  | 9.573  | 9.400  | 12608  | CEBPB         | NM_009883_2_+1  |
| Cebpg  | 5.941  | 5.742  | 5.400  | 4.783  | 5.583  | 5.380  | 6.149  | 5.998  | 6.619  | 6.764  | 12611  | CEBPG         | NM_009884_7_-1  |
| Celsr1 | 0.849  | -0.233 | 0.673  | -0.544 | 1.347  | 0.480  | -0.727 | -0.859 | -1.640 | -2.982 | 12614  | CELSR1        | NM_009886_15_-1 |
| Cfh    | -0.751 | -4.981 | 3.942  | 5.540  | -0.475 | 0.784  | 5.268  | 6.855  | 7.419  | 9.245  | 12628  | CFH           | NM_009888_1_-1  |
| Ch25h  | -4.981 | -4.981 | -2.466 | -2.092 | -3.922 | -4.114 | -0.294 | -2.716 | -2.288 | -4.981 | 12642  | CH25H         | NM_009890_19_-1 |
| Chil3  | -4.981 | -4.981 | 1.367  | 3.531  | -0.223 | 4.108  | 3.646  | 6.696  | 13.643 | 13.527 | 12655  | NA            | NM_009892_3_-1  |
| Cideb  | -4.981 | -2.883 | -3.928 | -3.099 | -4.456 | -4.975 | -2.735 | -4.316 | -1.383 | -1.432 | 12684  | CIDEB         | NM_009894_14_-1 |
| Cish   | -0.705 | 0.597  | 0.265  | -0.202 | -1.864 | -0.766 | 0.320  | 0.712  | 0.797  | -0.304 | 12700  | CISH          | NM_009895_9_+1  |
| Socs1  | 2.780  | 2.687  | 3.576  | 3.695  | 3.249  | 3.390  | 2.703  | 2.990  | 2.172  | 1.406  | 12703  | SOCS1         | NM_009896_16_-1 |
| Ckmt1  | -4.981 | -4.981 | -4.969 | -4.188 | -4.980 | -4.969 | -4.954 | -4.968 | -4.981 | -4.981 | 12716  | CKMT1A CKMT1B | NM_009897_2_+1  |
| Coro1a | 10.634 | 10.471 | 10.786 | 10.827 | 11.177 | 10.912 | 11.039 | 11.175 | 12.625 | 12.080 | 12721  | CORO1A        | NM_009898_7_-1  |
| Cla3a1 | -4.314 | -4.981 | -2.352 | -1.179 | -4.479 | -1.644 | -3.566 | -0.383 | -2.936 | -4.686 | 12722  | NA            | NM_009899_3_-1  |
| Clcn2  | 1.622  | 1.982  | 0.371  | 0.119  | 1.099  | 0.724  | 0.007  | 0.556  | -1.959 | 0.419  | 12724  | CLCN2         | NM_009900_16_-1 |
| Clgn   | -4.981 | -4.981 | -4.343 | -4.370 | -4.968 | -4.416 | -4.736 | -4.974 | -4.981 | -4.316 | 12745  | CLGN          | NM_009904_8_+1  |
| Tpp1   | 6.526  | 6.431  | 5.095  | 5.031  | 5.948  | 5.841  | 5.963  | 5.862  | 6.757  | 6.628  | 12751  | TPP1          | NM_009906_7_-1  |
| Cln3   | 4.093  | 3.834  | 2.627  | 2.770  | 2.747  | 2.252  | 2.450  | 3.274  | 3.096  | 3.024  | 12752  | CLN3          | NM_009907_7_-1  |
| Cmas   | 7.283  | 7.398  | 6.454  | 6.928  | 6.104  | 6.344  | 6.149  | 6.367  | 6.658  | 6.434  | 12764  | CMAS          | NM_009908_6_+1  |
| Cxcr2  | -0.415 | -0.383 | -0.152 | 1.062  | 0.636  | 2.325  | 2.460  | 2.926  | 1.430  | 0.002  | 12765  | CXCR2         | NM_009909_1_+1  |
| Cxcr3  | 8.332  | 8.645  | 6.506  | 6.470  | 2.060  | 2.952  | 2.236  | 3.901  | 1.808  | 1.827  | 12766  | CXCR3         | NM_009910_X_-1  |
| Cxcr4  | 5.656  | 5.530  | 5.136  | 5.528  | 5.539  | 5.712  | 6.096  | 6.597  | 5.661  | 5.976  | 12767  | CXCR4         | NM_009911_1_-1  |
| Ccr1   | 2.300  | 3.867  | 3.849  | 4.141  | 0.470  | 2.268  | 3.186  | 4.747  | 5.893  | 5.956  | 12768  | CCR1          | NM_009912_9_-1  |
| Ccr9   | 8.898  | 8.795  | 5.242  | 4.734  | 1.444  | 2.123  | 2.823  | 2.176  | -0.119 | 0.131  | 12769  | CCR9          | NM_009913_9_+1  |
| Ccr3   | 3.928  | 2.082  | 2.450  | 2.533  | 3.347  | 2.784  | 3.525  | 3.998  | 1.152  | 0.907  | 12771  | CCR3          | NM_009914_9_+1  |
| Ccr2   | 7.452  | 9.435  | 5.348  | 6.489  | 0.569  | 2.846  | 7.706  | 8.870  | 10.953 | 10.818 | 12772  | CCR2          | NM_009915_9_+1  |
| Ccr4   | -4.981 | -4.981 | -4.956 | -4.388 | -4.369 | -2.560 | -2.501 | -4.391 | -4.981 | -4.981 | 12773  | CCR4          | NM_009916_9_-1  |
| Ccr5   | 7.587  | 6.566  | 3.471  | 2.418  | 1.769  | 3.013  | 3.736  | 4.494  | 3.510  | 3.423  | 12774  | CCR5          | NM_009917_9_+1  |
| Cnga3  | -4.981 | -4.981 | -4.984 | -4.984 | 2.434  | -3.400 | 1.197  | -4.876 | -4.981 | -4.981 | 12790  | CNGA3         | NM_009918_1_+1  |
| Cnih1  | 6.975  | 6.756  | 6.034  | 5.781  | 5.453  | 5.264  | 5.898  | 5.635  | 5.272  | 5.084  | 12793  | CNIH1         | NM_009919_14_-1 |

|         |        |        |        |        |        |        |        |        |        |        |        |         |                 |
|---------|--------|--------|--------|--------|--------|--------|--------|--------|--------|--------|--------|---------|-----------------|
| Cnih2   | -0.781 | -2.043 | -2.773 | -2.816 | -1.441 | -2.662 | -2.516 | -4.538 | -0.861 | -3.313 | 12794  | CNIH2   | NM_009920_19_-1 |
| Camp    | -0.877 | -4.981 | -3.677 | 1.258  | -4.319 | 4.096  | -4.378 | 5.553  | 8.693  | -4.981 | 12796  | CAMP    | NM_009921_9_-1  |
| Cnp     | 8.915  | 8.877  | 7.337  | 7.425  | 6.999  | 7.011  | 6.675  | 7.172  | 6.229  | 6.124  | 12799  | CNP     | NM_009923_11_+1 |
| Cnr2    | -4.092 | -3.788 | 5.836  | 5.452  | 4.019  | 3.738  | 4.143  | 4.412  | 5.663  | 5.735  | 12802  | CNR2    | NM_009924_4_+1  |
| Col10a1 | -1.262 | -0.747 | -1.640 | -1.075 | -0.619 | -1.013 | -2.128 | -2.492 | -0.922 | -1.229 | 12813  | COL10A1 | NM_009925_10_+1 |
| Col11a2 | -0.787 | -1.176 | 0.647  | 0.874  | -0.518 | -0.371 | -0.772 | -0.620 | -1.713 | -0.174 | 12815  | COL11A2 | NM_009926_17_+1 |
| Col15a1 | -0.809 | -0.684 | -2.838 | -1.086 | -2.681 | -1.393 | -2.684 | -3.133 | -1.980 | -2.982 | 12819  | COL15A1 | NM_009928_4_+1  |
| Col18a1 | -4.981 | -4.981 | -4.084 | -1.751 | -2.925 | -2.524 | -3.569 | -2.844 | -4.981 | -4.981 | 12822  | COL18A1 | NM_009929_10_-1 |
| Col4a1  | -3.349 | -4.981 | -3.929 | -3.010 | -4.885 | -2.583 | 0.160  | 0.938  | 2.765  | 2.062  | 12826  | COL4A1  | NM_009931_8_-1  |
| Col4a2  | -2.164 | -1.589 | -4.957 | -1.993 | -4.724 | -2.660 | -0.160 | -0.070 | 1.055  | -0.991 | 12827  | COL4A2  | NM_009932_8_+1  |
| Col9a3  | 0.410  | 0.617  | -0.014 | -0.482 | -0.497 | 2.119  | -0.755 | 0.641  | 0.838  | -0.128 | 12841  | COL9A3  | NM_009936_2_+1  |
| Colq    | -1.473 | -2.160 | -0.277 | 0.610  | -1.829 | -1.778 | -1.078 | -0.347 | -4.981 | -4.981 | 382864 | NA      | NM_009937_14_-1 |
| Copa    | 6.403  | 5.821  | 7.505  | 7.120  | 7.213  | 6.754  | 7.230  | 7.043  | 8.089  | 8.091  | 12847  | COPA    | NM_009938_1_+1  |
| Cops2   | 4.794  | 5.058  | 4.952  | 4.949  | 4.217  | 4.677  | 4.623  | 4.563  | 4.677  | 5.055  | 12848  | NA      | NM_009939_2_-1  |
| Coq7    | 4.493  | 4.801  | 3.856  | 4.070  | 3.607  | 3.837  | 3.534  | 3.913  | 2.551  | 2.648  | 12850  | COQ7    | NM_009940_7_-1  |
| Cox4i1  | 9.350  | 9.122  | 8.663  | 8.795  | 8.651  | 8.658  | 8.959  | 8.992  | 8.570  | 8.325  | 12857  | COX4I1  | NM_009941_8_+1  |
| Cox5b   | 8.276  | 8.029  | 8.081  | 8.027  | 8.129  | 7.996  | 8.168  | 7.848  | 7.190  | 6.838  | 12859  | NA      | NM_009942_1_+1  |
| Cox6a2  | 10.045 | 9.386  | -0.755 | -0.902 | -1.252 | -0.256 | -0.014 | 0.475  | -2.195 | -4.981 | 12862  | COX6A2  | NM_009943_7_-1  |
| Cox7a1  | -1.776 | -2.132 | -1.179 | -0.903 | -1.530 | -1.185 | -1.651 | -1.615 | -2.202 | -1.906 | 12865  | COX7A1  | NM_009944_7_+1  |
| Cox7a2  | 8.005  | 7.921  | 7.537  | 7.558  | 7.427  | 7.549  | 7.572  | 7.443  | 6.665  | 6.503  | 12866  | COX7A2  | NM_009945_9_-1  |
| Cplx2   | -2.431 | -2.563 | -2.658 | -3.175 | -2.842 | -1.974 | -2.876 | -1.367 | -3.233 | -2.050 | 12890  | CPLX2   | NM_009946_13_+1 |
| Cpt1b   | -0.798 | -0.648 | -0.661 | -2.493 | -0.848 | -0.639 | -2.056 | -1.384 | -1.263 | -0.437 | 12895  | CPT1B   | NM_009948_15_-1 |
| Cpt2    | 3.851  | 4.064  | 4.404  | 4.735  | 3.710  | 3.947  | 4.076  | 4.068  | 4.250  | 4.343  | 12896  | CPT2    | NM_009949_4_-1  |
| Cradd   | 3.311  | 2.902  | 2.436  | 2.279  | 2.652  | 2.580  | 2.561  | 2.206  | 3.006  | 2.586  | 12905  | CRADD   | NM_009950_10_-1 |
| Creb1   | 2.925  | 3.198  | 3.653  | 3.481  | 3.456  | 3.221  | 3.665  | 3.384  | 2.804  | 3.974  | 12912  | CREB1   | NM_009952_1_+1  |
| Bcar1   | -4.379 | -4.981 | -4.519 | -4.717 | -4.869 | -4.947 | -4.832 | -4.561 | -4.981 | -4.700 | 12927  | BCAR1   | NM_009954_8_-1  |
| Dpysl2  | 5.090  | 5.290  | 4.800  | 4.396  | 4.283  | 3.403  | 4.990  | 4.777  | 4.715  | 4.541  | 12934  | DPYSL2  | NM_009955_14_-1 |
| Ptgdrr2 | -4.981 | -4.981 | -0.510 | -1.428 | -0.640 | -1.857 | -3.310 | -0.580 | -3.805 | -4.981 | 14764  | PTGDR2  | NM_009962_19_+1 |
| Cry2    | 2.371  | 2.421  | 1.737  | 1.759  | 3.020  | 2.464  | 2.347  | 1.651  | 2.874  | 2.289  | 12953  | CRY2    | NM_009963_2_-1  |
| Cryab   | -0.733 | -0.733 | -2.516 | 0.393  | -2.820 | -4.654 | -1.213 | -3.295 | -2.503 | -1.865 | 12955  | CRYAB   | NM_009964_9_+1  |
| Cryz    | 1.016  | 2.118  | 3.362  | 4.340  | 3.452  | 3.831  | 2.773  | 3.022  | 0.541  | 1.948  | 12972  | CRYZ    | NM_009968_3_+1  |
| Csf2    | -4.981 | -4.981 | -4.875 | -4.875 | -4.398 | -2.854 | -3.172 | -4.154 | -4.981 | -4.981 | 12981  | CSF2    | NM_009969_11_-1 |
| Csf2ra  | 4.857  | 4.864  | 7.709  | 7.619  | 7.121  | 7.352  | 7.573  | 7.770  | 8.583  | 8.463  | 12982  | CSF2RA  | NM_009970_19_-1 |
| Csnk2a2 | 3.645  | 3.832  | 4.045  | 4.010  | 3.591  | 3.267  | 3.548  | 3.366  | 3.692  | 3.598  | 13000  | CSNK2A2 | NM_009974_8_-1  |
| Csnk2b  | 7.342  | 7.123  | 6.865  | 6.790  | 6.675  | 6.578  | 6.493  | 6.548  | 6.156  | 6.000  | 13001  | CSNK2B  | NM_009975_17_-1 |
| Cst3    | 10.953 | 10.503 | 13.953 | 13.776 | 10.463 | 11.114 | 11.717 | 12.408 | 11.304 | 12.361 | 13010  | CST3    | NM_009976_2_-1  |
| Cst7    | 3.225  | 1.066  | 0.815  | 1.822  | 4.132  | 4.739  | 3.968  | 3.914  | 1.271  | 0.406  | 13011  | CST7    | NM_009977_2_+1  |
| Ctbp2   | 1.480  | 0.927  | 4.565  | 4.681  | 2.841  | 2.759  | 4.324  | 4.560  | 5.291  | 5.503  | 13017  | CTBP2   | NM_009980_7_-1  |
| Pcvt1a  | 4.346  | 4.354  | 3.214  | 3.060  | 4.243  | 4.172  | 4.837  | 4.484  | 6.407  | 6.180  | 13026  | PCYT1A  | NM_009981_16_+1 |
| Ctsc    | 8.203  | 8.405  | 6.842  | 6.772  | 8.057  | 7.833  | 8.712  | 9.065  | 9.810  | 10.327 | 13032  | CTSC    | NM_009982_7_+1  |
| Ctsd    | 8.331  | 8.366  | 5.812  | 6.417  | 7.444  | 7.479  | 7.680  | 8.166  | 8.647  | 8.771  | 13033  | CTSD    | NM_009983_7_-1  |
| Ctsl    | 11.848 | 11.649 | 3.382  | 3.978  | 3.952  | 3.886  | 4.850  | 5.543  | 5.834  | 6.687  | 13039  | CTSV    | NM_009984_13_-1 |
| Ctsw    | 5.114  | 4.771  | 1.243  | 1.257  | 0.754  | 2.369  | 0.700  | 2.829  | 0.366  | -1.537 | 13041  | CTSW    | NM_009985_19_-1 |
| Cux1    | 0.036  | -1.880 | 1.562  | 1.741  | 0.720  | 1.710  | 1.573  | 0.668  | 1.473  | 0.727  | 13047  | NA      | NM_009986_5_-1  |
| Cx3cr1  | -0.277 | -1.787 | 3.825  | 3.394  | 3.027  | 2.498  | 7.388  | 8.168  | 8.982  | 9.016  | 13051  | CX3CR1  | NM_009987_9_-1  |
| Cxadr   | -0.549 | -3.267 | -4.284 | -2.628 | -3.386 | -1.289 | -4.159 | -3.478 | -4.160 | -2.571 | 13052  | CXADR   | NM_009988_16_+1 |
| Clip2   | -3.453 | -3.008 | 0.392  | -1.894 | -4.422 | -1.674 | -3.481 | -4.729 | -4.230 | -4.530 | 269713 | CLIP2   | NM_009990_5_-1  |
| Cyp21a1 | -4.981 | -4.981 | -4.981 | -4.981 | -4.953 | -4.442 | -4.981 | -4.981 | -4.981 | -4.981 | 13079  | CYP21A2 | NM_009995_17_-1 |
| Cyp2b10 | -4.981 | -4.981 | -4.910 | -3.729 | -3.011 | -3.307 | -4.929 | -4.955 | -1.658 | -1.771 | 13088  | CYP2B6  | NM_009999_7_+1  |
| Cyp2j6  | -0.112 | -0.036 | -4.672 | -3.414 | -3.210 | -2.948 | -2.272 | -2.001 | -4.981 | -1.671 | 13110  | CYP2J2  | NM_010008_4_-1  |
| Cyp46a1 | -2.443 | -0.888 | -4.981 | -4.981 | -4.318 | -4.936 | -4.981 | -4.981 | -4.981 | -4.981 | 13116  | CYP46A1 | NM_010010_12_+1 |
| Cyp8b1  | -4.981 | -4.981 | 3.097  | 4.531  | -4.962 | -4.683 | -3.991 | -1.087 | -4.981 | -4.342 | 13124  | CYP8B1  | NM_010012_9_-1  |
| Dad1    | 0.284  | -0.731 | -0.623 | -3.066 | 0.668  | -1.790 | -0.802 | -2.759 | -0.336 | -4.129 | 13135  | DAD1    | NM_010015_14_-1 |
| Cd55    | 3.278  | 1.844  | 0.814  | 2.169  | 1.098  | 2.524  | 2.093  | 4.747  | -0.519 | -0.059 | 13136  | CD55    | NM_010016_1_-1  |
| Dag1    | 0.986  | 0.833  | 1.420  | 0.776  | -0.604 | -0.412 | -0.696 | 0.422  | 1.953  | 2.758  | 13138  | DAG1    | NM_010017_9_-1  |
| Dao     | -4.981 | -4.830 | -4.909 | -4.969 | -4.905 | -4.962 | -4.939 | -4.978 | -4.976 | -4.981 | 13142  | DAO     | NM_010018_5_+1  |
| Dapk2   | -3.349 | 0.076  | 1.813  | 3.834  | 2.045  | 3.761  | 0.655  | 1.880  | 0.131  | -0.284 | 13143  | DAPK2   | NM_010019_9_+1  |
| Slc6a3  | -4.981 | -4.981 | -3.789 | -3.918 | -4.012 | -0.911 | -4.960 | -4.538 | -4.981 | -4.981 | 13162  | SLC6A3  | NM_010020_13_+1 |
| Dazl    | -4.319 | -3.315 | -3.107 | -3.649 | -2.111 | -2.866 | -3.691 | -4.962 | -4.261 | -4.981 | 13164  | DAZ2    | NM_010021_17_-1 |
| Dbt     | 4.143  | 4.734  | 4.404  | 4.674  | 3.823  | 4.296  | 3.562  | 4.107  | 3.714  | 4.045  | 13171  | DBT     | NM_010022_3_+1  |
| Eci1    | 5.371  | 5.272  | 5.376  | 5.615  | 5.048  | 5.159  | 5.238  | 5.405  | 4.753  | 4.256  | 13177  | ECI1    | NM_010023_17_+1 |
| Asap1   | -0.979 | -4.172 | -3.566 | -4.180 | -1.458 | -1.816 | -2.606 | -4.151 | -3.926 | -2.635 | 13196  | ASAP1   | NM_010026_15_-1 |
| Ddt     | 5.761  | 5.630  | 5.233  | 5.077  | 5.050  | 5.171  | 5.335  | 4.917  | 3.621  | 3.162  | 13202  | DDT     | NM_010027_10_-1 |
| Ddx3x   | 7.491  | 7.520  | 7.901  | 8.007  | 7.833  | 8.106  | 7.890  | 8.029  | 8.106  | 8.625  | 13205  | DDX3X   | NM_010028_X_+1  |
| Ddx4    | -1.663 | -4.981 | -2.015 | -1.598 | -1.193 | -3.280 | -2.127 | -1.342 | -1.371 | -2.453 | 13206  | DDX4    | NM_010029_13_-1 |
| Des     | -1.774 | -1.799 | -2.021 | -4.173 | -3.832 | -4.507 | -2.715 | -2.219 | -2.298 | -4.981 | 13346  | DES     | NM_010043_1_+1  |
| Dffa    | 1.977  | 2.468  | 1.800  | 2.502  | 2.621  | 2.851  | 1.572  | 2.381  | 1.902  | 2.402  | 13347  | DFFA    | NM_010044_4_+1  |
| Ackr1   | -4.981 | 0.159  | -1.372 | 1.026  | 3.300  | 2.773  | 2.027  | 1.927  | -2.953 | -1.977 | 13349  | ACKR1   | NM_010045_1_-1  |
| Dgat1   | 3.856  | 4.131  | 3.475  | 3.460  | 3.898  | 3.934  | 4.264  | 3.859  | 4.629  | 4.174  | 13350  | DGAT1   | NM_010046_15_-1 |
| Dgcr6   | -4.981 | -4.981 | -4.981 | -4.981 | -4.981 | -4.981 | -4.981 | -4.981 | -4.981 | -4.981 | 13353  | NA      | NM_010047_16_+1 |
| Dgcr2   | 4.263  | 4.169  | 4.136  | 4.085  | 4.245  | 4.122  | 4.299  | 4.365  | 5.050  | 5.023  | 13356  | DGCR2   | NM_010048_16_-1 |
| Dhfr    | 2.221  | 2.974  | 3.658  | 3.668  | 3.890  | 3.679  | 3.294  | 3.182  | 1.382  | 0.787  | 13361  | DHFR    | NM_010049_13_+1 |
| Dio2    | -4.981 | -4.981 | -4.981 | -4.981 | -4.966 | -4.857 | -4.924 | -3.904 | -3.242 | -3.882 | 13371  | DIO2    | NM_010050_12_-1 |
| Dkk1    | -4.981 | -4.981 | -4.981 | -4.981 | -3.762 | -4.940 | -4.974 | -4.966 | -4.981 | -4.316 | 13380  | DKK1    | NM_010051_19_-1 |

|          |        |        |        |        |        |        |        |        |        |        |        |          |                 |
|----------|--------|--------|--------|--------|--------|--------|--------|--------|--------|--------|--------|----------|-----------------|
| Dlk1     | -4.981 | -4.486 | -4.981 | -4.981 | -4.981 | -4.981 | -4.981 | -4.981 | -4.981 | -4.981 | 13386  | DLK1     | NM_010052_12_+1 |
| Dlx1     | -4.981 | -4.981 | -4.956 | -4.956 | -4.973 | -4.973 | -4.982 | -5.005 | -4.981 | -4.981 | 13390  | DLX1     | NM_010053_2_+1  |
| Dmwd     | 2.213  | 2.081  | -2.384 | -2.226 | 1.323  | 1.156  | -0.949 | -0.329 | -2.409 | -2.993 | 13401  | DMWD     | NM_010058_7_+1  |
| Dmc1     | -1.006 | -4.981 | -2.168 | -4.891 | -0.851 | -4.954 | -0.834 | -4.938 | -4.981 | -4.981 | 13404  | DMC1     | NM_010059_15_-1 |
| Dnah11   | -4.981 | -4.981 | -4.158 | -4.821 | -4.863 | -2.440 | -4.971 | -3.931 | -4.981 | -4.981 | 13411  | DNAH11   | NM_010060_12_-1 |
| Dnase1   | -4.981 | -4.981 | -2.438 | -3.614 | -3.772 | -3.774 | -3.673 | -4.684 | -2.143 | -3.855 | 13419  | DNASE1   | NM_010061_16_+1 |
| Dnase2a  | 4.133  | 4.061  | 3.811  | 3.886  | 3.943  | 3.999  | 4.199  | 4.238  | 3.716  | 3.470  | 13423  | DNASE2   | NM_010062_8_+1  |
| Dync1i2  | 3.811  | 4.076  | 4.092  | 4.018  | 3.730  | 3.655  | 4.238  | 4.252  | 4.601  | 4.898  | 13427  | NA       | NM_010064_2_+1  |
| Dnm1     | -1.648 | -2.116 | -4.609 | -4.181 | -4.976 | -4.946 | -4.981 | -4.981 | -4.981 | -4.981 | 13429  | DNM1     | NM_010065_2_-1  |
| Dnmt1    | 2.309  | 2.663  | 2.920  | 4.308  | 4.174  | 3.885  | 3.855  | 3.937  | 3.609  | 4.238  | 13433  | DNMT1    | NM_010066_9_-1  |
| Trdmt1   | 3.443  | 3.198  | 2.646  | 3.001  | 3.193  | 2.908  | 2.956  | 3.036  | 3.520  | 3.337  | 13434  | TRDMT1   | NM_010067_2_-1  |
| Dnmt3b   | 0.074  | 0.018  | 0.430  | -0.281 | -0.159 | -2.503 | -2.613 | -1.980 | -0.035 | -0.625 | 13436  | DNMT3B   | NM_010068_2_+1  |
| Doc2a    | 2.522  | 2.555  | 1.992  | 2.018  | 2.042  | 1.469  | 1.718  | 1.630  | 2.746  | 2.528  | 13446  | DOC2A    | NM_010069_7_+1  |
| Dok1     | 3.293  | 2.150  | 5.232  | 5.365  | 5.204  | 5.305  | 5.117  | 5.022  | 5.167  | 5.277  | 13448  | DOK1     | NM_010070_6_-1  |
| Dok2     | 0.684  | -0.475 | 0.754  | 0.897  | -0.392 | 1.056  | 2.041  | 3.841  | 3.721  | 4.375  | 13449  | DOK2     | NM_010071_14_+1 |
| Dpm1     | 6.929  | 6.776  | 5.576  | 5.616  | 5.396  | 5.486  | 5.891  | 5.745  | 5.447  | 5.129  | 13480  | DPM1     | NM_010072_2_-1  |
| Dpm2     | 7.134  | 7.033  | 5.929  | 5.810  | 5.943  | 5.988  | 6.107  | 6.039  | 5.593  | 5.344  | 13481  | DPM2     | NM_010073_2_+1  |
| Dpp4     | 6.548  | 6.789  | 8.713  | 8.803  | 8.657  | 8.592  | 8.271  | 8.232  | 5.765  | 6.235  | 13482  | DPP4     | NM_010074_2_-1  |
| Drp2     | -4.981 | -4.981 | -3.324 | -4.870 | -3.606 | -3.240 | -4.369 | -4.962 | -4.981 | -4.227 | 13497  | DRP2     | NM_010078_X_+1  |
| Dsg1a    | -4.981 | -4.981 | -4.981 | -4.981 | -4.906 | -4.613 | -4.981 | -4.981 | -4.981 | -4.981 | 13510  | DSG1     | NM_010079_18_+1 |
| Dst      | -2.848 | -0.500 | -3.001 | -1.304 | 0.046  | -0.611 | -1.319 | -2.016 | -3.556 | -2.645 | 13518  | NA       | NM_010081_1_+1  |
| Dusp2    | 4.046  | 2.574  | 7.832  | 7.723  | 7.806  | 7.935  | 7.852  | 8.109  | 7.194  | 7.164  | 13537  | DUSP2    | NM_010090_2_+1  |
| Dvl1     | -3.042 | 0.145  | 2.662  | 3.530  | 2.610  | 3.157  | 2.757  | 3.649  | 3.900  | 3.971  | 13542  | DVL1     | NM_010091_4_+1  |
| Dyrk1b   | 2.885  | 2.734  | 2.389  | 2.125  | 1.413  | 1.838  | 1.879  | 1.256  | 2.615  | 2.437  | 13549  | DYRK1B   | NM_010092_7_+1  |
| E2f3     | 0.472  | 0.936  | 1.636  | 1.964  | 1.956  | 1.777  | 0.207  | 1.020  | 1.471  | -0.024 | 13557  | E2F3     | NM_010093_13_-1 |
| Lefty1   | 8.271  | 8.287  | 3.297  | 2.956  | 0.402  | 0.243  | -0.942 | 0.637  | 0.054  | 0.115  | 13590  | LEFTY1   | NM_010094_1_+1  |
| Sparrcl1 | -1.901 | -2.349 | -3.176 | -4.923 | -4.950 | -4.678 | -4.965 | -3.993 | -4.981 | -4.981 | 13602  | SPARCL1  | NM_010097_5_-1  |
| Opn3     | 2.475  | 1.910  | 2.861  | 3.061  | 2.132  | 1.612  | 2.165  | 2.056  | 1.639  | 2.527  | 13603  | OPN3     | NM_010098_1_-1  |
| Eda      | -3.753 | -2.939 | -1.312 | -3.823 | -4.593 | -4.871 | -4.978 | -4.923 | -4.981 | -4.548 | 13607  | NA       | NM_010099_X_+1  |
| S1pr3    | -1.442 | -2.600 | -2.240 | 0.896  | -0.754 | 1.783  | -1.375 | 3.166  | -0.151 | 0.526  | 13610  | S1PR3    | NM_010101_13_+1 |
| S1pr4    | 3.249  | 3.163  | 0.519  | 1.002  | 0.307  | 0.358  | 1.610  | 1.934  | 2.907  | 1.876  | 13611  | S1PR4    | NM_010102_10_-1 |
| Edil3    | -2.853 | -4.981 | -4.976 | -4.894 | -4.981 | -4.981 | -4.973 | -4.977 | -1.161 | -1.338 | 13612  | EDIL3    | NM_010103_13_+1 |
| Edn1     | -4.981 | -1.980 | -3.510 | -3.366 | -0.936 | -1.277 | -2.182 | -3.231 | -4.981 | -3.855 | 13614  | EDN1     | NM_010104_13_+1 |
| Eef1a1   | 11.127 | 11.152 | 11.836 | 11.832 | 11.950 | 11.670 | 11.709 | 11.772 | 11.962 | 11.958 | 13627  | EEF1A1   | NM_010106_9_-1  |
| Efna1    | -4.504 | -4.981 | -4.813 | -4.248 | -4.881 | -3.286 | -2.940 | -1.968 | -4.981 | -3.319 | 13636  | EFNA1    | NM_010107_3_-1  |
| Efna5    | 0.485  | 1.578  | -3.826 | -4.029 | -0.656 | -1.773 | -4.148 | -3.931 | -3.415 | -3.967 | 13640  | EFNA5    | NM_010109_17_-1 |
| Efnb1    | 1.020  | 1.780  | 2.378  | 4.282  | 1.695  | 3.907  | 1.430  | 2.686  | 1.966  | 1.787  | 13641  | EFNB1    | NM_010110_X_+1  |
| Efnb2    | -3.563 | -2.160 | -2.177 | -4.086 | 0.501  | -0.183 | -0.838 | -0.144 | 0.284  | 0.851  | 13642  | EFNB2    | NM_010111_8_-1  |
| Egf      | 1.008  | 0.891  | -0.500 | -0.012 | -0.363 | -0.260 | 0.319  | -1.150 | -1.871 | -0.752 | 13645  | EGF      | NM_010113_3_-1  |
| Klk1b9   | 0.452  | 0.996  | -4.952 | -4.952 | -4.981 | -4.981 | -4.921 | -4.883 | -4.981 | -4.981 | 13648  | KLK3     | NM_010116_7_+1  |
| Rhbdf1   | 3.076  | 3.459  | 2.362  | 3.205  | -0.019 | -0.039 | -0.634 | 2.350  | 1.656  | 1.326  | 13650  | RHBDF1   | NM_010117_11_-1 |
| Egr2     | 2.149  | 1.113  | 4.307  | 4.075  | 7.394  | 8.094  | 5.887  | 5.188  | 1.444  | 2.587  | 13654  | EGR2     | NM_010118_10_+1 |
| Ehd1     | 3.967  | 3.536  | 4.970  | 5.201  | 6.023  | 5.958  | 5.880  | 6.240  | 5.932  | 5.740  | 13660  | EHD1     | NM_010119_19_+1 |
| Eif1a    | 6.409  | 6.542  | 6.797  | 6.819  | 5.645  | 5.807  | 6.046  | 6.265  | 6.083  | 6.203  | 13664  | EIF1AX   | NM_010120_18_+1 |
| Eif2ak3  | 4.288  | 4.583  | 4.255  | 4.048  | 4.010  | 4.824  | 4.160  | 4.573  | 5.164  | 5.244  | 13666  | EIF2AK3  | NM_010121_6_+1  |
| Eif2b4   | 4.257  | 4.488  | 4.640  | 5.018  | 4.000  | 4.097  | 4.253  | 4.590  | 4.627  | 4.494  | 13667  | EIF2B4   | NM_010122_5_-1  |
| Eif3a    | 7.596  | 7.372  | 8.079  | 7.880  | 7.770  | 7.746  | 7.685  | 7.633  | 7.447  | 7.564  | 13669  | EIF3A    | NM_010123_19_-1 |
| Eif4ebp2 | 3.135  | 3.100  | 3.813  | 3.753  | 3.442  | 3.314  | 3.523  | 3.667  | 4.323  | 4.164  | 13688  | EIF4EBP2 | NM_010124_10_-1 |
| Pou6f1   | 1.734  | 2.959  | -1.101 | -0.861 | 0.078  | -1.244 | -0.287 | -1.212 | -1.918 | -2.863 | 19009  | POU6F1   | NM_010127_15_-1 |
| Emp1     | 0.353  | 1.307  | -3.975 | 0.040  | -3.419 | -0.314 | 1.356  | 4.600  | 2.162  | 8.089  | 13730  | EMP1     | NM_010128_6_+1  |
| Emp3     | 9.263  | 9.331  | 5.713  | 5.667  | 7.239  | 6.780  | 8.081  | 8.422  | 8.698  | 8.622  | 13732  | EMP3     | NM_010129_7_-1  |
| Adgre1   | 4.095  | 2.326  | 3.878  | 4.089  | 8.089  | 8.175  | 8.287  | 8.102  | 8.351  | 8.770  | 13733  | ADGRE1   | NM_010130_17_+1 |
| En2      | -4.981 | -4.981 | -4.952 | -4.952 | -4.737 | -4.571 | -4.573 | -2.965 | -3.322 | -1.962 | 13799  | EN2      | NM_010134_5_+1  |
| Enah     | -4.981 | -4.332 | -3.876 | -4.742 | -3.630 | -3.832 | -3.034 | -2.689 | -3.777 | -2.893 | 13800  | ENAH     | NM_010135_1_-1  |
| Eomes    | -3.882 | -3.125 | -4.137 | -4.276 | -4.930 | -3.505 | -3.570 | -1.126 | -2.226 | -4.037 | 13813  | EOMES    | NM_010136_9_+1  |
| Epas1    | -3.028 | -4.981 | -3.016 | -2.170 | -4.624 | -2.233 | -1.899 | -0.588 | -0.719 | 1.304  | 13819  | EPAS1    | NM_010137_17_+1 |
| Epha2    | 5.639  | 5.128  | -2.667 | -0.851 | -1.686 | -3.454 | -2.140 | -2.001 | -3.823 | -4.981 | 13836  | EPHA2    | NM_010139_4_+1  |
| Epha7    | -4.981 | -4.981 | -4.851 | -4.952 | -4.617 | -4.853 | -2.750 | -4.019 | -2.216 | -2.610 | 13841  | EPHA7    | NM_010141_4_+1  |
| Ephb2    | 1.500  | -0.508 | -3.748 | -4.424 | -2.074 | -4.490 | -3.595 | -4.045 | -4.981 | -4.133 | 13844  | EPHB2    | NM_010142_4_-1  |
| Ephb3    | -4.981 | -4.981 | -1.777 | 0.123  | -0.573 | -0.626 | -4.777 | -2.747 | -4.981 | -4.981 | 13845  | EPHB3    | NM_010143_16_+1 |
| Ephb4    | -4.981 | -4.981 | -4.525 | -4.378 | -4.381 | -3.748 | -4.958 | -2.598 | -4.981 | -4.981 | 13846  | EPHB4    | NM_010144_5_+1  |
| Ephx1    | 2.712  | 2.415  | 3.371  | 4.049  | 2.664  | 3.103  | 2.841  | 4.309  | 1.482  | 1.588  | 13849  | EPHX1    | NM_010145_1_-1  |
| Epm2a    | -2.362 | -1.138 | -2.755 | -3.857 | -2.600 | -2.519 | -2.140 | -4.183 | -4.981 | -1.996 | 13853  | EPM2A    | NM_010146_10_+1 |
| Epn1     | 3.621  | 3.712  | 4.183  | 3.897  | 4.659  | 4.299  | 4.337  | 4.062  | 5.254  | 4.899  | 13854  | EPN1     | NM_010147_7_+1  |
| Epn2     | -3.236 | -2.680 | -4.185 | -4.381 | -3.878 | -4.344 | -4.968 | -4.700 | -4.192 | -4.254 | 13855  | EPN2     | NM_010148_11_-1 |
| Epor     | 0.188  | -0.247 | -1.227 | 1.697  | 0.603  | 2.253  | -0.514 | 2.598  | -1.105 | -0.634 | 13857  | EPOR     | NM_010149_9_-1  |
| Nr2f6    | 3.747  | 3.055  | 4.046  | 4.174  | 4.287  | 4.552  | 4.216  | 4.055  | 4.555  | 4.702  | 13864  | NR2F6    | NM_010150_8_-1  |
| Erbp3    | 1.114  | 1.899  | -0.527 | -0.192 | -0.539 | -0.007 | -0.706 | 1.376  | 1.493  | 2.307  | 13867  | ERBP3    | NM_010153_10_-1 |
| Erf      | -1.104 | -0.826 | 1.323  | 1.101  | 1.215  | 1.259  | 0.203  | 0.856  | 0.845  | 0.608  | 13875  | ERF      | NM_010155_7_-1  |
| Samd9l   | 5.129  | 6.017  | 6.953  | 6.609  | 6.913  | 6.508  | 7.233  | 7.136  | 7.034  | 7.869  | 209086 | SAMD9L   | NM_010156_6_-1  |
| Khdrbs3  | -3.563 | -2.997 | 0.534  | 2.558  | -4.507 | -2.640 | -2.087 | -0.994 | -1.905 | -4.981 | 13992  | KHDRBS3  | NM_010158_15_+1 |
| Celf2    | 3.561  | 3.873  | 2.800  | 3.233  | 3.645  | 3.394  | 3.282  | 2.483  | 2.617  | 2.844  | 14007  | CELF2    | NM_010160_2_-1  |
| Evi2a    | 10.128 | 10.228 | 8.213  | 8.238  | 8.976  | 9.271  | 8.626  | 8.757  | 8.389  | 8.715  | 14017  | EVI2A    | NM_010161_11_-1 |
| Ext1     | 2.457  | 1.964  | 4.064  | 3.962  | 2.928  | 2.715  | 4.292  | 4.670  | 5.579  | 5.522  | 14042  | EXT1     | NM_010162_15_-1 |

|        |        |        |        |        |        |        |        |        |        |        |        |        |                 |
|--------|--------|--------|--------|--------|--------|--------|--------|--------|--------|--------|--------|--------|-----------------|
| Ext2   | 5.530  | 5.841  | 5.327  | 5.592  | 5.093  | 5.298  | 5.209  | 5.698  | 6.097  | 6.229  | 14043  | EXT2   | NM_010163_2_-1  |
| Eya1   | 2.713  | 2.250  | -0.971 | -2.624 | -0.596 | -3.850 | -2.556 | -3.170 | -3.886 | -4.739 | 14048  | EYA1   | NM_010164_1_-1  |
| Eya2   | -3.563 | -4.670 | -4.912 | -1.932 | -2.832 | -2.570 | -1.958 | -0.867 | -4.693 | -4.981 | 14049  | EYA2   | NM_010165_2_+1  |
| Eya3   | -0.939 | -3.660 | -4.283 | -4.681 | -3.162 | -1.334 | -4.589 | -2.092 | -4.442 | -4.566 | 14050  | EYA3   | NM_010166_4_+1  |
| Eya4   | -4.981 | -4.981 | -4.949 | -4.567 | -3.726 | -4.425 | -3.041 | -2.893 | -4.981 | -1.685 | 14051  | EYA4   | NM_010167_10_-1 |
| F2     | -1.799 | -1.244 | -3.345 | -1.925 | -1.827 | -2.685 | -4.291 | -4.449 | -4.981 | -4.981 | 14061  | F2     | NM_010168_2_-1  |
| F2r    | -0.961 | -0.046 | -1.115 | 1.617  | -0.273 | 0.121  | -0.120 | 1.407  | -0.108 | -2.969 | 14062  | F2R    | NM_010169_13_-1 |
| F2rl2  | 0.922  | 0.331  | 4.089  | 4.758  | -0.800 | -0.630 | 0.221  | 1.410  | 0.255  | -0.471 | 14064  | F2RL2  | NM_010170_13_+1 |
| F3     | -4.981 | -4.981 | -4.824 | -4.187 | -4.908 | -4.963 | -4.624 | -3.075 | -4.981 | -4.981 | 14066  | F3     | NM_010171_3_+1  |
| F7     | -4.981 | -4.981 | -4.981 | -4.981 | -4.936 | -4.771 | -3.537 | -4.867 | 0.943  | 0.333  | 14068  | F7     | NM_010172_8_+1  |
| Faah   | 1.527  | 0.082  | -0.487 | 0.743  | 2.421  | 2.809  | 1.162  | 2.448  | -3.471 | -1.722 | 14073  | FAAH   | NM_010173_4_-1  |
| Fabp3  | -2.123 | -4.981 | -4.477 | -4.901 | -4.198 | -4.972 | -2.131 | -2.106 | -0.845 | -1.618 | 14077  | FABP3  | NM_010174_4_+1  |
| Fadd   | 2.359  | 2.135  | 2.499  | 2.617  | 2.455  | 2.393  | 2.423  | 2.148  | 2.670  | 2.768  | 14082  | FADD   | NM_010175_7_-1  |
| Fah    | 0.512  | 3.654  | -0.257 | 2.345  | -0.037 | 1.669  | 0.456  | 2.009  | -1.429 | 1.991  | 14085  | FAH    | NM_010176_7_-1  |
| Fasl   | 0.454  | -3.446 | -4.541 | -2.748 | -4.063 | 2.795  | -0.258 | 0.713  | -4.732 | -4.981 | 14103  | FASLG  | NM_010177_1_-1  |
| Srsf10 | 4.836  | 5.302  | 4.888  | 5.096  | 4.850  | 4.769  | 4.767  | 4.952  | 3.868  | 4.781  | 14105  | SRSF10 | NM_010178_4_+1  |
| Fbln1  | -4.981 | -4.981 | -4.971 | -4.782 | -2.841 | -2.630 | -4.807 | -4.977 | -4.981 | -3.480 | 14114  | FBLN1  | NM_010180_15_+1 |
| Fbrs   | 4.683  | 5.176  | 4.931  | 4.980  | 5.080  | 5.368  | 5.053  | 4.764  | 4.408  | 4.645  | 14123  | FBR5   | NM_010183_7_+1  |
| Fcer1a | -4.981 | -1.144 | -4.942 | -0.553 | -4.977 | -1.907 | 2.991  | -2.523 | -4.981 | -4.981 | 14125  | FCER1A | NM_010184_1_-1  |
| Fcer1g | 10.370 | 9.038  | 7.422  | 6.276  | 10.058 | 9.357  | 10.985 | 10.049 | 10.966 | 9.867  | 14127  | FCER1G | NM_010185_1_-1  |
| Fcgr1  | 1.795  | -1.404 | 0.595  | -0.080 | 1.297  | 0.837  | 3.804  | 5.756  | 6.504  | 6.915  | 14129  | FCGR1A | NM_010186_3_-1  |
| Fcgr2b | 4.522  | 5.813  | 4.789  | 2.157  | 2.913  | 2.112  | 7.157  | 6.552  | 7.850  | 6.381  | 14130  | FCGR2B | NM_010187_1_-1  |
| Fcgr3  | 3.733  | 1.135  | 2.995  | 2.409  | 3.792  | 2.963  | 6.901  | 7.183  | 9.297  | 8.698  | 14131  | FCGR2A | NM_010188_1_-1  |
| Fcgrt  | 6.526  | 6.145  | 7.744  | 7.945  | 6.338  | 6.021  | 7.216  | 7.383  | 6.649  | 6.590  | 14132  | FCGRT  | NM_010189_7_-1  |
| Fcnb   | -4.981 | -4.981 | -4.948 | -4.179 | -4.949 | -3.052 | -4.880 | -4.077 | 5.501  | 0.728  | 14134  | FCN1   | NM_010190_2_-1  |
| Fdft1  | 6.808  | 7.000  | 4.895  | 3.852  | 4.399  | 4.360  | 4.613  | 4.701  | 4.794  | 5.004  | 14137  | FDF1T  | NM_010191_14_-1 |
| Fem1a  | 4.094  | 4.209  | 4.385  | 4.438  | 4.573  | 4.328  | 4.716  | 4.739  | 5.206  | 5.038  | 14154  | FEM1A  | NM_010192_17_+1 |
| Fem1b  | 4.133  | 4.430  | 4.527  | 4.420  | 4.442  | 4.481  | 4.412  | 4.772  | 4.496  | 4.716  | 14155  | FEM1B  | NM_010193_9_-1  |
| Fes    | 6.738  | 6.625  | 6.783  | 6.155  | 7.611  | 7.152  | 7.686  | 7.029  | 8.747  | 7.679  | 14159  | FES    | NM_010194_7_-1  |
| Lgr5   | 2.470  | 2.139  | -3.692 | -4.816 | -3.262 | -4.749 | -4.063 | -3.214 | -2.678 | -3.667 | 14160  | LGR5   | NM_010195_10_-1 |
| Fgf1   | -2.147 | -1.118 | -3.260 | -2.507 | -3.173 | -2.655 | -2.808 | -1.119 | -3.738 | -2.725 | 14164  | FGF1   | NM_010197_18_-1 |
| Fgf11  | -4.621 | -4.981 | -4.257 | -4.563 | -4.732 | -3.323 | -4.392 | -2.565 | -2.283 | -4.360 | 14166  | FGF11  | NM_010198_11_-1 |
| Fgf13  | -4.981 | -4.981 | -4.981 | -4.981 | -4.918 | -4.918 | -4.933 | -4.145 | -4.981 | -4.981 | 14168  | FGF13  | NM_010200_X_-1  |
| Fgf6   | -4.981 | -4.981 | -4.978 | -4.222 | -4.894 | -3.496 | -3.077 | -4.991 | -4.981 | -4.981 | 14177  | FGF6   | NM_010204_6_+1  |
| Fgfr1  | -3.803 | -0.240 | -0.869 | -1.095 | -4.298 | -1.492 | 0.945  | -0.470 | -2.295 | -4.903 | 14182  | FGFR1  | NM_010206_8_+1  |
| Fgr    | 8.240  | 8.450  | 6.066  | 6.448  | 8.627  | 8.833  | 8.727  | 8.839  | 9.637  | 9.655  | 14191  | FGR    | NM_010208_4_+1  |
| Fh1    | 6.619  | 7.292  | 6.870  | 7.552  | 7.025  | 7.345  | 7.021  | 7.325  | 5.567  | 6.311  | 14194  | FH     | NM_010209_1_-1  |
| Fhit   | -1.060 | -4.981 | -4.426 | -4.626 | -3.852 | -3.712 | -4.934 | -4.903 | -4.830 | -4.963 | 14198  | FHIT   | NM_010210_14_-1 |
| Fhl1   | -4.360 | -2.060 | -4.891 | -0.506 | -2.634 | -1.776 | -4.288 | -3.029 | 0.850  | 0.886  | 14199  | FHL1   | NM_010211_X_+1  |
| Fhl2   | -4.981 | -2.437 | -2.818 | -4.870 | -4.941 | -3.944 | -3.652 | -3.344 | -2.934 | -4.981 | 14200  | FHL2   | NM_010212_1_-1  |
| Fhl3   | -1.518 | 1.158  | -2.221 | 0.006  | 1.291  | 4.438  | 0.074  | 2.348  | -1.635 | 1.185  | 14201  | FHL3   | NM_010213_4_+1  |
| Fhl4   | 0.951  | 1.470  | -0.713 | -1.779 | 0.346  | 0.550  | -2.837 | -3.217 | -4.981 | -3.855 | 14202  | NA     | NM_010214_10_-1 |
| Il4i1  | 3.706  | 4.315  | 7.590  | 8.120  | 8.662  | 8.787  | 8.065  | 7.307  | 2.218  | 2.161  | 14204  | IL4I1  | NM_010215_7_+1  |
| Vegfd  | 1.584  | 1.507  | -4.952 | -4.952 | -4.566 | -4.963 | -4.782 | -4.975 | -4.981 | -4.981 | 14205  | VEGFD  | NM_010216_X_+1  |
| Ctgf   | -2.494 | -4.981 | -3.640 | 0.032  | -3.533 | -1.434 | -3.592 | 0.686  | -4.981 | -1.099 | 14219  | CTGF   | NM_010217_10_+1 |
| Fjx1   | -2.948 | -4.981 | -3.501 | -3.765 | -4.577 | -3.492 | -4.833 | -2.912 | -4.981 | -4.981 | 14221  | FJX1   | NM_010218_2_-1  |
| Fkbp4  | 6.519  | 6.750  | 6.354  | 6.091  | 5.956  | 5.842  | 6.056  | 6.382  | 5.812  | 5.748  | 14228  | FKBP4  | NM_010219_6_-1  |
| Fkbp5  | 3.358  | 3.511  | 3.258  | 3.286  | 4.320  | 4.199  | 4.073  | 3.593  | 5.315  | 4.575  | 14229  | FKBP5  | NM_010220_17_-1 |
| Fkbp10 | -2.238 | -4.981 | -0.975 | -1.847 | -4.484 | -4.985 | -4.969 | -4.712 | -4.981 | -4.981 | 14230  | FKBP10 | NM_010221_11_+1 |
| Fkbp7  | 3.658  | 3.359  | 1.779  | 1.512  | 1.222  | 1.331  | 2.011  | 1.677  | 2.411  | 2.242  | 14231  | FKBP7  | NM_010222_2_-1  |
| Fkbp8  | 3.765  | 3.744  | 3.904  | 4.140  | 4.210  | 4.068  | 3.425  | 3.743  | 4.178  | 3.459  | 14232  | FKBP8  | NM_010223_8_+1  |
| Foxs1  | -2.178 | -4.981 | -4.926 | -2.933 | -1.585 | -0.178 | -3.351 | -3.073 | -4.981 | -4.981 | 14239  | FOX51  | NM_010226_2_-1  |
| Flna   | 4.507  | 4.086  | 7.806  | 7.560  | 7.821  | 7.637  | 8.663  | 8.910  | 11.038 | 11.088 | 192176 | FLNA   | NM_010227_X_-1  |
| Flt1   | -3.563 | -1.137 | 4.423  | 4.414  | -4.976 | -4.076 | 1.903  | 1.285  | 4.435  | 3.170  | 14254  | FLT1   | NM_010228_5_-1  |
| Flt3   | 8.380  | 8.512  | 9.351  | 8.972  | 8.910  | 8.802  | 8.594  | 7.731  | 6.171  | 4.555  | 14255  | FLT3   | NM_010229_5_-1  |
| Fmn1   | -4.981 | -4.981 | -4.981 | -4.981 | -4.583 | -3.520 | -4.976 | -4.978 | -4.981 | -4.981 | 14260  | FMN1   | NM_010230_2_+1  |
| Fmo5   | 1.718  | 2.247  | 3.506  | 3.190  | 0.995  | 2.774  | 0.454  | 1.489  | 1.753  | 2.634  | 14263  | FMO5   | NM_010232_3_+1  |
| Fn1    | -4.865 | -4.981 | -4.910 | -4.916 | -4.974 | -4.969 | -4.575 | -3.222 | 2.120  | 1.195  | 14268  | FN1    | NM_010233_1_-1  |
| Fos    | 11.001 | 11.094 | 10.906 | 10.901 | 11.764 | 11.943 | 11.196 | 11.441 | 12.632 | 13.276 | 14281  | FOS    | NM_010234_12_+1 |
| Fosl1  | -4.981 | -4.981 | -4.980 | -4.560 | -4.863 | -3.842 | -1.658 | -2.862 | -3.228 | -2.277 | 14283  | FOSL1  | NM_010235_19_+1 |
| Fpgs   | 3.197  | 2.627  | 2.695  | 2.904  | 2.539  | 2.868  | 2.443  | 2.913  | 2.084  | 2.019  | 14287  | FPGS   | NM_010236_2_-1  |
| Brd2   | 5.447  | 5.249  | 6.327  | 6.413  | 5.755  | 5.903  | 6.029  | 6.092  | 6.425  | 6.541  | 14312  | BRD2   | NM_010238_17_-1 |
| Fth1   | 14.122 | 14.466 | 11.707 | 11.697 | 12.316 | 12.201 | 12.534 | 12.190 | 10.944 | 11.224 | 14319  | FTH1   | NM_010239_19_+1 |
| Ftl1   | 12.341 | 12.447 | 12.298 | 12.502 | 12.432 | 12.345 | 12.723 | 12.939 | 13.422 | 13.697 | 14325  | FTL    | NM_010240_7_-1  |
| Aktip  | -3.571 | -3.430 | -4.277 | -4.308 | -4.488 | -4.831 | -3.792 | -4.867 | -3.929 | -2.392 | 14339  | AKTIP  | NM_010241_8_-1  |
| Fut4   | 2.587  | 2.514  | 3.987  | 4.226  | 5.555  | 5.092  | 5.658  | 4.707  | 5.446  | 5.434  | 14345  | FUT4   | NM_010242_9_-1  |
| Fv1    | 0.494  | 1.146  | 0.430  | 0.764  | 0.384  | 1.165  | 0.548  | 1.399  | 1.269  | 1.702  | 14349  | NA     | NM_010244_4_+1  |
| Fzd9   | -1.551 | 0.083  | -4.511 | -2.471 | -4.987 | -3.021 | -4.954 | -4.643 | -4.394 | -4.981 | 14371  | FZD9   | NM_010246_5_-1  |
| Xrcc6  | 6.402  | 5.839  | 4.314  | 4.149  | 5.002  | 4.656  | 4.585  | 4.124  | 3.556  | 2.701  | 14375  | XRCC6  | NM_010247_15_+1 |
| Gab2   | 2.621  | 1.444  | 3.496  | 3.021  | 3.562  | 3.059  | 4.753  | 3.706  | 5.878  | 5.266  | 14389  | GAB2   | NM_010248_7_+1  |
| Gabpb1 | 1.323  | 2.793  | 1.991  | 2.491  | 1.584  | 0.914  | 0.872  | 1.162  | -1.213 | 1.564  | 14391  | GABPB1 | NM_010249_2_-1  |
| Gal    | -4.981 | 0.613  | -2.418 | -1.589 | 0.463  | 1.885  | -0.982 | 0.492  | 0.577  | -0.989 | 14419  | GAL    | NM_010253_19_-1 |
| Gamt   | 2.192  | 2.416  | 2.170  | 2.155  | 0.451  | 0.153  | 1.511  | 2.055  | 3.214  | 2.911  | 14431  | GAMT   | NM_010255_10_-1 |
| Gart   | 4.754  | 4.363  | 4.743  | 5.068  | 5.578  | 5.344  | 5.213  | 5.296  | 5.095  | 4.973  | 14450  | GART   | NM_010256_16_-1 |

|         |        |        |        |        |        |        |        |        |        |        |        |              |                 |
|---------|--------|--------|--------|--------|--------|--------|--------|--------|--------|--------|--------|--------------|-----------------|
| Gata6   | -4.981 | -2.997 | -3.380 | -3.244 | -4.947 | -4.779 | -4.978 | -4.406 | -4.394 | -4.981 | 14465  | GATA6        | NM_010258_18_+1 |
| Gbp2b   | -4.981 | -1.059 | 0.906  | 8.350  | -4.072 | 1.346  | -1.462 | 3.554  | -4.981 | 0.603  | 14468  | GBP3         | NM_010259_3_+1  |
| Gbp2    | 1.853  | 1.622  | 4.164  | 7.566  | 4.421  | 5.909  | 5.145  | 6.726  | 5.165  | 5.646  | 14469  | GBP2         | NM_010260_3_+1  |
| Rabac1  | 8.396  | 8.307  | 6.863  | 6.480  | 6.890  | 7.397  | 7.421  | 7.367  | 7.202  | 6.838  | 14470  | RABAC1       | NM_010261_7_-1  |
| Nr6a1   | -4.499 | -1.485 | -1.849 | -2.265 | -3.233 | -2.289 | -3.364 | -1.480 | -4.407 | -4.648 | 14536  | NR6A1        | NM_010264_2_-1  |
| Gcnt1   | 0.164  | 0.093  | -0.471 | -3.339 | -0.850 | -2.249 | 0.025  | -1.837 | 0.756  | 0.522  | 14537  | GCNT1        | NM_010265_19_-1 |
| Gda     | -1.681 | -0.973 | -0.832 | 2.063  | -1.741 | 1.890  | 4.099  | 4.324  | 7.027  | 7.325  | 14544  | GDA          | NM_010266_19_-1 |
| Gdap1   | -4.981 | -0.824 | -2.876 | -4.959 | -2.051 | -0.528 | -4.965 | -4.953 | -4.981 | -4.981 | 14545  | GDAP1        | NM_010267_1_+1  |
| Gdap2   | 4.908  | 5.028  | 5.379  | 5.222  | 4.655  | 4.760  | 5.002  | 4.962  | 5.777  | 5.657  | 14547  | GDAP2        | NM_010269_3_+1  |
| Mrps33  | 7.477  | 7.279  | 6.800  | 6.803  | 6.393  | 6.609  | 6.701  | 6.489  | 5.471  | 5.538  | 14548  | MRPS33       | NM_010270_6_-1  |
| Gpd1    | 0.151  | -4.981 | -1.211 | 0.392  | -0.001 | -0.247 | -0.180 | 0.290  | -0.726 | -1.650 | 14555  | GPD1         | NM_010271_15_+1 |
| Gdf11   | -4.981 | -4.981 | -4.912 | -4.235 | -3.069 | -3.556 | -4.922 | -3.254 | -4.981 | -4.316 | 14561  | GDF11        | NM_010272_10_-1 |
| Gdi1    | 6.677  | 6.892  | 7.146  | 7.136  | 7.917  | 7.879  | 7.317  | 7.414  | 7.515  | 7.491  | 14567  | GDI1         | NM_010273_X_+1  |
| Gpd2    | 2.630  | 3.460  | 5.971  | 6.045  | 5.613  | 5.201  | 4.656  | 4.885  | 5.075  | 4.730  | 14571  | GPD2         | NM_010274_2_+1  |
| Gdnf    | -4.981 | -4.981 | -4.981 | -4.981 | -4.981 | -4.981 | -4.978 | -4.829 | -4.981 | -4.981 | 14573  | GDNF         | NM_010275_15_+1 |
| Gem     | 6.566  | 7.104  | 2.006  | 2.878  | 3.981  | 3.860  | 2.311  | 2.941  | -0.675 | -1.116 | 14579  | GEM          | NM_010276_4_+1  |
| Gfap    | -4.981 | -4.981 | -4.946 | -1.421 | -3.438 | -2.590 | -3.838 | -3.948 | -4.394 | -3.354 | 14580  | GFAP         | NM_010277_11_-1 |
| Gfi1    | -4.441 | -4.181 | -4.782 | -4.185 | -4.751 | -0.874 | -4.610 | -3.055 | -4.584 | -4.981 | 14581  | GFI1         | NM_010278_5_-1  |
| Gfra1   | -4.672 | -4.981 | -4.920 | -4.927 | -4.981 | -4.981 | -4.980 | -4.981 | -4.981 | -4.981 | 14585  | GFRA1        | NM_010279_19_-1 |
| Gfra3   | 2.746  | 1.956  | -4.960 | -4.960 | -4.975 | -4.975 | -4.981 | -4.981 | -4.981 | -4.981 | 14587  | GFRA3        | NM_010280_18_-1 |
| Ggh     | 4.253  | 3.215  | 3.838  | 2.809  | 5.476  | 4.539  | 5.828  | 4.726  | 6.877  | 5.932  | 14590  | GGH          | NM_010281_4_+1  |
| Ggps1   | 5.887  | 5.202  | 5.160  | 4.806  | 5.209  | 4.746  | 4.894  | 4.603  | 4.798  | 4.352  | 14593  | GGPS1        | NM_010282_13_-1 |
| Ggta1   | 0.209  | 2.282  | 2.272  | 2.372  | 3.763  | 3.314  | 3.156  | 3.458  | 3.302  | 3.646  | 14594  | NA           | NM_010283_2_-1  |
| Ghr     | -4.981 | -4.981 | -4.975 | -4.981 | -4.981 | -4.981 | -4.896 | -4.935 | -4.731 | -4.006 | 14600  | GHR          | NM_010284_15_-1 |
| Tsc22d3 | 9.564  | 8.643  | 8.049  | 7.475  | 8.564  | 8.563  | 8.240  | 8.362  | 8.441  | 8.535  | 14605  | TSC22D3      | NM_010286_X_-1  |
| Gpr83   | -4.981 | -4.981 | -4.927 | -4.574 | -2.239 | -2.247 | 1.765  | 2.088  | -0.387 | 1.691  | 14608  | GPR83        | NM_010287_9_+1  |
| Gja1    | -1.549 | -2.437 | -3.206 | -1.405 | -3.845 | -1.413 | -3.700 | -0.580 | -2.450 | -1.795 | 14609  | GJA1         | NM_010288_10_+1 |
| Gck     | -4.981 | -4.981 | -4.981 | -4.981 | -4.049 | -4.873 | -4.951 | -4.133 | -4.981 | -4.981 | 103988 | GCK          | NM_010292_11_-1 |
| Gclc    | 4.152  | 4.250  | 7.364  | 5.995  | 4.503  | 4.223  | 4.520  | 4.927  | 4.942  | 4.748  | 14629  | GCLC         | NM_010295_9_+1  |
| Gli1    | -4.981 | -4.981 | -1.533 | -3.798 | -1.645 | -2.779 | -0.867 | -2.155 | -1.891 | -1.197 | 14632  | GLI1         | NM_010296_10_-1 |
| Gm2a    | 9.473  | 9.571  | 11.759 | 11.620 | 11.243 | 11.578 | 11.233 | 11.332 | 10.394 | 10.666 | 14667  | GM2A         | NM_010299_11_+1 |
| Gna11   | 6.397  | 6.195  | 4.037  | 4.091  | 3.974  | 3.954  | 3.790  | 3.604  | 4.032  | 3.732  | 14672  | GNA11        | NM_010301_10_-1 |
| Gna12   | 3.200  | 3.445  | 3.991  | 4.614  | 3.818  | 3.777  | 3.919  | 4.736  | 4.610  | 5.111  | 14673  | GNA12        | NM_010302_5_-1  |
| Gna13   | 6.972  | 6.664  | 6.600  | 6.605  | 6.171  | 6.019  | 5.960  | 6.184  | 6.576  | 6.690  | 14674  | GNA13        | NM_010303_11_+1 |
| Gna15   | 6.489  | 6.844  | 5.459  | 5.909  | 2.612  | 2.694  | 3.406  | 4.046  | 4.307  | 3.863  | 14676  | GNA15        | NM_010304_10_-1 |
| Gnai1   | 0.993  | 2.014  | -4.974 | -3.854 | -4.960 | -4.949 | -4.973 | -2.685 | -4.981 | -4.981 | 14677  | GNAI1        | NM_010305_5_-1  |
| Gnai3   | 5.927  | 6.412  | 7.232  | 7.303  | 6.875  | 6.870  | 6.865  | 6.936  | 7.208  | 7.722  | 14679  | GNAI3        | NM_010306_3_-1  |
| Gnal    | 4.556  | 4.406  | 4.959  | 4.802  | 4.312  | 4.521  | 4.396  | 4.393  | 4.416  | 4.465  | 14680  | GNAL         | NM_010307_18_+1 |
| Gnao1   | -3.090 | -4.981 | -2.948 | -4.841 | -4.149 | -4.975 | -4.448 | -4.950 | -4.981 | -3.797 | 14681  | GNAO1        | NM_010308_8_+1  |
| Gnas    | -2.548 | -4.981 | -4.848 | -4.874 | -4.903 | -4.954 | -4.981 | -4.918 | -4.981 | -4.981 | 14683  | GNAS         | NM_010309_2_+1  |
| Gnaz    | -4.981 | -1.805 | -3.707 | -3.324 | -3.309 | -1.763 | -2.476 | -3.533 | -1.097 | -0.250 | 14687  | GNAZ         | NM_010311_10_+1 |
| Gnb2    | 6.681  | 6.440  | 7.265  | 7.329  | 7.139  | 7.068  | 7.362  | 7.363  | 8.263  | 8.180  | 14693  | GNB2         | NM_010312_5_-1  |
| Gnb5    | -1.738 | -1.915 | -3.470 | -3.178 | -2.962 | -3.852 | -2.310 | -4.089 | -4.394 | -2.874 | 14697  | GNB5         | NM_010313_9_+1  |
| Gng2    | 3.478  | 2.868  | 3.750  | 3.783  | 2.539  | 2.898  | 2.339  | 2.314  | 3.233  | 2.435  | 14702  | GNG2         | NM_010315_14_-1 |
| Gng3    | -2.871 | -2.374 | -2.302 | -3.085 | -3.419 | -4.410 | -2.942 | -2.397 | -2.986 | -3.234 | 14704  | GNG3         | NM_010316_19_-1 |
| Gng4    | -4.981 | -4.981 | -1.868 | -4.908 | -3.232 | -4.015 | -3.582 | -3.743 | -4.981 | -4.981 | 14706  | GNG4         | NM_010317_13_+1 |
| Gng5    | 9.048  | 8.855  | 8.370  | 8.394  | 8.345  | 8.499  | 8.972  | 8.844  | 8.209  | 8.544  | 14707  | GNG5         | NM_010318_3_+1  |
| Gng7    | -3.040 | -2.648 | -1.695 | -1.576 | -0.312 | 0.159  | -0.718 | -3.437 | -1.176 | -0.372 | 14708  | GNG7         | NM_010319_10_-1 |
| Gng8    | -4.981 | -4.981 | -4.981 | -4.981 | -4.809 | -4.226 | -4.977 | -4.971 | -4.981 | -4.981 | 14709  | GNG8         | NM_010320_7_+1  |
| Gnmt    | -2.604 | -0.349 | -1.454 | -1.961 | 0.408  | 1.172  | 0.843  | 1.104  | 1.622  | 2.564  | 14711  | GNMT         | NM_010321_17_-1 |
| Gnpat   | 5.174  | 5.276  | 5.357  | 5.528  | 5.346  | 5.431  | 5.222  | 5.500  | 5.575  | 5.624  | 14712  | GNPAT        | NM_010322_8_+1  |
| Got1    | 5.010  | 5.521  | 5.106  | 5.653  | 4.078  | 4.628  | 4.257  | 4.670  | 2.653  | 3.737  | 14718  | GOT1         | NM_010324_19_-1 |
| Got2    | 6.266  | 5.968  | 8.056  | 8.307  | 7.481  | 7.296  | 6.829  | 6.827  | 7.086  | 6.739  | 14719  | GOT2         | NM_010325_8_-1  |
| Gp1ba   | -0.290 | -0.896 | -1.117 | -1.082 | -0.332 | -0.733 | 0.091  | -1.996 | -0.322 | 0.553  | 14723  | GP1BA        | NM_010326_11_+1 |
| Gp1bb   | -1.714 | -0.875 | -4.286 | 0.210  | -1.794 | -1.470 | -1.705 | -0.489 | 0.734  | 0.387  | 14724  | GP1BB        | NM_010327_16_-1 |
| Emb     | 5.396  | 7.331  | 4.483  | 3.861  | 7.608  | 7.554  | 8.371  | 8.376  | 9.700  | 9.899  | 13723  | EMB          | NM_010330_13_+1 |
| Gpaa1   | 5.411  | 5.319  | 4.815  | 4.907  | 4.933  | 5.134  | 5.277  | 5.361  | 5.622  | 5.241  | 14731  | GPAA1        | NM_010331_15_+1 |
| Ednra   | -4.981 | -4.981 | -4.900 | -4.900 | -2.673 | -4.108 | -4.938 | -4.346 | -2.712 | -4.981 | 13617  | EDNRA        | NM_010332_8_-1  |
| S1pr2   | 0.549  | 0.640  | 3.172  | 2.820  | 0.833  | 0.471  | 2.960  | 4.004  | 5.731  | 5.692  | 14739  | S1PR2        | NM_010333_9_-1  |
| Lpar1   | -4.981 | -3.863 | -1.833 | -0.913 | 0.886  | 1.205  | 0.448  | 1.196  | -1.737 | -0.213 | 14745  | LPAR1        | NM_010336_4_-1  |
| Gsr     | 6.366  | 3.704  | 6.641  | 6.167  | 5.923  | 5.405  | 8.184  | 6.226  | 10.791 | 7.843  | 14782  | GSR          | NM_010344_8_+1  |
| Grb10   | -4.981 | -4.981 | -4.893 | -1.288 | -4.363 | -1.679 | -4.956 | -1.050 | -4.981 | -4.885 | 14783  | GRB10        | NM_010345_11_-1 |
| Grb7    | -2.739 | -4.981 | -2.613 | -0.650 | -3.752 | -3.888 | -3.960 | -3.508 | -4.981 | -4.981 | 14786  | GRB7         | NM_010346_11_+1 |
| Aes     | 7.583  | 7.385  | 7.146  | 7.306  | 7.780  | 7.546  | 7.545  | 7.390  | 7.428  | 7.199  | 14797  | AES          | NM_010347_10_+1 |
| Grin2c  | -4.981 | -4.981 | -3.345 | -3.326 | -0.094 | -0.451 | -1.216 | -1.752 | -4.981 | -4.342 | 14813  | GRIN2C       | NM_010350_11_-1 |
| Gsg1    | -4.795 | -4.628 | -4.860 | -4.956 | -4.955 | -4.973 | -4.844 | -4.961 | -4.963 | -4.960 | 14840  | GSG1         | NM_010352_6_-1  |
| Gsg2    | 1.531  | 1.076  | 3.507  | 3.048  | 3.212  | 2.990  | 3.075  | 2.896  | 2.602  | 2.510  | 14841  | GSG2         | NM_010353_11_-1 |
| Gsta3   | -2.164 | -4.981 | -4.373 | -4.935 | -2.324 | -4.028 | -3.482 | -4.190 | -4.981 | -2.684 | 14859  | GSTA3        | NM_010356_1_+1  |
| Gsta4   | -1.733 | -2.097 | -2.348 | 0.705  | -0.271 | 0.551  | -0.351 | 1.216  | -1.028 | -1.292 | 14860  | NA           | NM_010357_9_+1  |
| Gstm1   | 2.953  | 3.502  | 1.993  | 3.192  | 1.704  | 3.158  | 4.955  | 5.227  | 7.691  | 7.300  | 14862  | GSTM5        | NM_010358_3_-1  |
| Gstm5   | 1.558  | 3.039  | -0.716 | 2.788  | 0.262  | 3.106  | 1.017  | 3.557  | 0.106  | 1.238  | 14866  | GSTM3        | NM_010360_3_+1  |
| Gstt2   | 5.008  | 4.716  | 3.693  | 3.825  | 2.593  | 3.536  | 2.972  | 3.425  | 1.367  | 1.607  | 14872  | GSTT2 GSTT2B | NM_010361_10_-1 |
| Gsto1   | 5.815  | 5.706  | 7.680  | 7.496  | 8.582  | 8.440  | 8.524  | 7.938  | 7.919  | 7.482  | 14873  | GSTO1        | NM_010362_19_+1 |
| Gstz1   | 4.446  | 4.562  | 3.159  | 3.553  | 2.892  | 3.250  | 2.911  | 2.995  | 2.422  | 2.278  | 14874  | GSTZ1        | NM_010363_12_+1 |

|          |        |        |        |        |        |        |        |        |        |        |           |          |                 |
|----------|--------|--------|--------|--------|--------|--------|--------|--------|--------|--------|-----------|----------|-----------------|
| Gtf2h4   | 4.265  | 4.379  | 3.558  | 3.557  | 3.209  | 3.239  | 3.367  | 3.494  | 3.203  | 3.237  | 14885     | GTF2H4   | NM_010364_17_-1 |
| Gtf2i    | 4.698  | 4.695  | 3.120  | 3.396  | 3.324  | 3.622  | 2.378  | 2.580  | 2.384  | 3.305  | 14886     | GTF2I    | NM_010365_5_-1  |
| Magi1    | -4.981 | -4.981 | -4.975 | -4.975 | -4.975 | -4.973 | -4.979 | -4.948 | -4.981 | -4.925 | 14924     | MAGI1    | NM_010367_6_-1  |
| Gusb     | 6.559  | 6.649  | 9.631  | 9.883  | 6.017  | 5.960  | 6.684  | 7.442  | 7.698  | 7.914  | 110006    | GUSB     | NM_010368_5_-1  |
| Gypa     | -0.363 | 3.573  | 0.031  | 4.398  | 1.042  | 4.829  | 1.555  | 4.553  | -0.188 | 2.063  | 14934     | NA       | NM_010369_8_+1  |
| Gzma     | 2.030  | -4.981 | 1.144  | -1.494 | -1.289 | 0.665  | 1.787  | 1.946  | 1.062  | -4.981 | 14938     | GZMA     | NM_010370_13_-1 |
| Gzmc     | -4.981 | -4.981 | -4.887 | -4.887 | -4.899 | -4.417 | -3.488 | -3.154 | -4.981 | -4.981 | 14940     | NA       | NM_010371_14_-1 |
| H13      | 8.865  | 8.763  | 7.445  | 7.514  | 7.226  | 7.054  | 7.458  | 7.648  | 7.849  | 7.447  | 14950     | HM13     | NM_010376_2_+1  |
| H2-Aa    | 12.416 | 12.427 | 13.207 | 13.207 | 13.513 | 13.358 | 13.346 | 13.053 | 7.530  | 7.259  | 14960     | HLA-DQA1 | NM_010378_17_-1 |
| H2-D1    | 12.625 | 12.469 | 11.983 | 12.127 | 12.188 | 11.961 | 12.251 | 12.209 | 13.527 | 12.650 | 14964     | HLA-A    | NM_010380_17_+1 |
| H2-Ea-ps | 0.377  | -0.445 | -2.067 | -2.554 | 0.107  | -0.933 | -1.816 | -2.951 | -3.738 | -4.981 | 100504404 | HLA-DRA  | NM_010381_17_-1 |
| H2-Eb1   | 11.338 | 11.164 | 12.947 | 12.853 | 13.185 | 13.025 | 12.927 | 12.784 | 6.428  | 5.656  | 14969     | HLA-DRB5 | NM_010382_17_+1 |
| Pfdn6    | 5.857  | 5.710  | 5.003  | 5.130  | 5.279  | 5.194  | 5.613  | 5.400  | 4.716  | 4.333  | 14976     | PFDN6    | NM_010385_17_-1 |
| H2-DMa   | 9.804  | 9.592  | 10.032 | 10.028 | 9.738  | 9.768  | 9.774  | 9.941  | 8.142  | 8.150  | 14998     | HLA-DMA  | NM_010386_17_+1 |
| H2-DMb1  | 8.409  | 8.287  | 9.320  | 9.391  | 8.918  | 8.939  | 9.042  | 9.312  | 6.428  | 6.560  | 14999     | HLA-DMB  | NM_010387_17_+1 |
| H2-DMb2  | 7.984  | 7.748  | 8.967  | 9.123  | 10.161 | 10.270 | 9.435  | 9.470  | 6.023  | 6.154  | 15000     | HLA-DMB  | NM_010388_17_+1 |
| H2-Ob    | 2.709  | 1.000  | 8.506  | 8.601  | 8.985  | 9.163  | 8.013  | 7.729  | 1.162  | 1.427  | 15002     | HLA-DOB  | NM_010389_17_+1 |
| H2-Q1    | 5.200  | 4.619  | 4.503  | 4.771  | 4.272  | 4.055  | 4.316  | 4.133  | 3.869  | 3.043  | 15006     | HLA-A    | NM_010390_17_+1 |
| H2-Q10   | 1.495  | 0.850  | 1.223  | 1.219  | 0.920  | 0.009  | 0.441  | 0.474  | 0.821  | -0.124 | 15007     | HLA-A    | NM_010391_17_+1 |
| H2-Q2    | 5.765  | 4.992  | 5.376  | 5.627  | 5.234  | 4.828  | 5.152  | 5.056  | 4.997  | 3.772  | 15013     | HLA-A    | NM_010392_17_+1 |
| H2-Q7    | 6.409  | 5.514  | 3.546  | 3.950  | 2.965  | 2.692  | 3.931  | 3.546  | 3.360  | 1.814  | 15018     | HLA-A    | NM_010394_17_+1 |
| H2-T10   | 6.808  | 6.522  | 5.497  | 5.786  | 5.511  | 5.569  | 5.409  | 5.291  | 4.754  | 4.108  | 15024     | NA       | NM_010395_17_-1 |
| H2-T22   | 3.429  | 2.983  | 1.885  | 2.753  | 1.253  | 0.944  | 1.752  | 1.662  | 1.385  | 1.076  | 15039     | NA       | NM_010397_17_-1 |
| H2-T23   | 7.103  | 6.885  | 6.605  | 6.636  | 6.914  | 6.927  | 6.353  | 6.235  | 4.787  | 4.263  | 15040     | HLA-E    | NM_010398_17_-1 |
| H2-T9    | 3.913  | 2.698  | 2.215  | 2.144  | 0.895  | 0.746  | 1.107  | 1.104  | 2.317  | 1.045  | 15051     | NA       | NM_010399_17_-1 |
| Hal      | -2.073 | 3.382  | -3.829 | -2.327 | -4.842 | 1.083  | -4.483 | 0.178  | 1.647  | 1.596  | 15109     | HAL      | NM_010401_10_+1 |
| Hap1     | -1.798 | -2.964 | 2.431  | 2.957  | 5.265  | 5.096  | 4.901  | 4.098  | -0.431 | 0.825  | 15114     | HAP1     | NM_010404_11_-1 |
| Hc       | -4.981 | -4.981 | 1.612  | 1.321  | -4.594 | -3.234 | -3.509 | -4.768 | -3.373 | -4.981 | 15139     | C5       | NM_010406_2_-1  |
| Hck      | 4.312  | 6.457  | 7.348  | 7.501  | 8.302  | 8.086  | 8.095  | 8.069  | 8.460  | 8.757  | 15162     | HCK      | NM_010407_2_+1  |
| Hcn1     | -4.981 | -4.981 | -4.989 | -3.531 | -4.967 | -3.895 | -4.244 | -4.099 | -4.394 | -4.981 | 15165     | HCN1     | NM_010408_13_+1 |
| Hdac3    | 5.847  | 5.894  | 5.312  | 5.415  | 5.334  | 5.331  | 5.107  | 5.252  | 5.306  | 5.360  | 15183     | HDAC3    | NM_010411_18_-1 |
| Hdac5    | 4.186  | 3.950  | 2.583  | 2.548  | 3.359  | 2.904  | 3.779  | 3.728  | 5.558  | 5.925  | 15184     | HDAC5    | NM_010412_11_-1 |
| Hdac6    | -1.487 | -0.061 | 1.312  | 1.606  | -1.003 | -0.256 | 1.473  | 1.486  | -4.066 | 0.639  | 15185     | HDAC6    | NM_010413_X_-1  |
| Htt      | 3.344  | 3.419  | 4.735  | 5.014  | 4.628  | 4.786  | 4.304  | 4.174  | 2.874  | 3.312  | 15194     | HTT      | NM_010414_5_+1  |
| Hbegf    | -0.736 | -1.460 | -1.952 | -1.619 | 1.082  | 2.565  | 1.309  | 1.658  | -1.101 | -0.259 | 15200     | HBEGF    | NM_010415_18_-1 |
| Gml2     | -4.981 | -4.981 | -4.814 | -3.910 | -4.977 | -4.523 | -4.970 | -4.813 | -4.981 | -4.342 | 15202     | GML      | NM_010416_15_+1 |
| Herc2    | 5.041  | 5.035  | 4.541  | 4.595  | 5.591  | 5.766  | 5.242  | 5.391  | 4.898  | 5.270  | 15204     | HERC2    | NM_010418_7_+1  |
| Hes5     | 0.347  | -0.235 | -0.157 | -2.462 | -1.663 | -1.808 | -1.525 | -0.819 | -2.989 | -4.981 | 15208     | HESS     | NM_010419_4_+1  |
| Hesx1    | 0.435  | -1.157 | -4.809 | -4.847 | -2.059 | -4.337 | -2.178 | -4.977 | -4.190 | -4.981 | 15209     | HESX1    | NM_010420_14_+1 |
| Hexa     | 7.745  | 7.768  | 7.667  | 7.921  | 7.229  | 7.283  | 7.853  | 8.376  | 8.799  | 8.993  | 15211     | HEXA     | NM_010421_9_+1  |
| Hexb     | 6.973  | 7.144  | 7.398  | 7.548  | 7.157  | 7.315  | 7.975  | 8.364  | 8.610  | 8.655  | 15212     | HEXB     | NM_010422_13_-1 |
| Hey1     | -4.981 | -4.981 | -3.597 | -4.618 | -3.645 | -4.310 | -2.195 | -4.585 | -1.640 | -2.572 | 15213     | HEY1     | NM_010423_3_-1  |
| Hfe      | 4.423  | 1.753  | 8.537  | 9.340  | 7.800  | 8.262  | 8.179  | 8.078  | 6.946  | 7.307  | 15216     | HFE      | NM_010424_13_-1 |
| Foxf1    | -2.727 | -4.981 | -4.209 | -4.977 | -4.854 | -4.944 | -3.771 | -4.927 | -3.750 | -3.510 | 15227     | FOXF1    | NM_010426_8_+1  |
| Hgf      | -4.670 | -4.582 | -4.837 | -4.975 | -2.149 | -2.735 | -0.103 | -0.885 | 1.001  | 1.511  | 15234     | HGF      | NM_010427_5_+1  |
| Hic1     | -4.981 | -4.981 | 0.379  | -0.911 | 2.248  | 1.580  | 0.576  | -1.984 | -3.043 | -3.120 | 15248     | HIC1     | NM_010430_11_-1 |
| Hif1a    | 6.064  | 6.653  | 6.140  | 6.253  | 6.060  | 6.243  | 6.219  | 6.362  | 6.883  | 7.531  | 15251     | HIF1A    | NM_010431_12_+1 |
| Hipk1    | 2.671  | 3.236  | 4.718  | 3.940  | 4.572  | 4.937  | 4.106  | 5.274  | 6.540  | 6.732  | 15257     | HIPK1    | NM_010432_3_-1  |
| Hipk2    | 3.031  | 2.698  | 4.398  | 4.825  | 3.529  | 3.244  | 3.786  | 4.019  | 4.116  | 4.002  | 15258     | HIPK2    | NM_010433_6_-1  |
| Hipk3    | 4.550  | 4.232  | 4.930  | 4.921  | 4.558  | 3.776  | 4.982  | 5.285  | 5.939  | 6.382  | 15259     | HIPK3    | NM_010434_2_-1  |
| Hira     | 2.315  | 1.634  | 2.116  | 2.062  | 1.984  | 1.780  | 1.828  | 1.873  | 2.539  | 2.317  | 15260     | HIRA     | NM_010435_16_+1 |
| H2afx    | 4.855  | 4.235  | 6.021  | 6.192  | 6.150  | 5.696  | 5.464  | 5.213  | 4.460  | 4.321  | 15270     | H2AFX    | NM_010436_9_+1  |
| Hivep2   | 0.787  | -1.231 | 3.703  | 3.298  | 3.845  | 4.229  | 4.016  | 4.376  | 2.346  | 2.475  | 15273     | HIVEP2   | NM_010437_10_+1 |
| Hk1      | 0.534  | -0.589 | -0.694 | -2.012 | 0.146  | -0.348 | -1.509 | -0.846 | 0.139  | -0.386 | 15275     | HK1      | NM_010438_10_-1 |
| Hmgb1    | 10.182 | 9.833  | 8.966  | 8.775  | 9.436  | 9.083  | 9.381  | 9.092  | 8.519  | 8.229  | 15289     | NA       | NM_010439_5_-1  |
| Hmg20b   | 2.731  | 2.582  | 2.864  | 2.716  | 2.091  | 2.268  | 2.684  | 2.357  | 2.382  | 2.153  | 15353     | HMG20B   | NM_010440_10_-1 |
| Hmga2    | -1.887 | 0.515  | -2.085 | -1.039 | -2.900 | -0.221 | -1.867 | -0.565 | -2.235 | 0.617  | 15364     | NA       | NM_010441_10_-1 |
| Hmox1    | 6.464  | 4.956  | 6.893  | 7.679  | 7.069  | 6.459  | 6.777  | 7.962  | 6.866  | 6.893  | 15368     | HMOX1    | NM_010442_8_+1  |
| Hmox2    | 1.654  | 0.678  | 0.494  | -1.755 | 0.105  | -0.321 | -0.066 | -4.760 | -0.039 | -0.512 | 15369     | HMOX2    | NM_010443_16_+1 |
| Nr4a1    | 5.702  | 6.270  | 7.945  | 7.559  | 10.132 | 9.966  | 9.413  | 9.268  | 10.851 | 10.591 | 15370     | NR4A1    | NM_010444_15_+1 |
| Hnrnpa1  | 7.288  | 7.405  | 7.336  | 7.332  | 7.368  | 7.209  | 7.130  | 7.005  | 5.584  | 5.484  | 15382     | NA       | NM_010447_15_+1 |
| Hnrnpab  | 7.621  | 7.861  | 7.917  | 7.959  | 7.857  | 7.705  | 7.621  | 7.578  | 7.060  | 6.871  | 15384     | HNRNPAB  | NM_010448_11_-1 |
| Hoxa1    | -4.981 | -4.981 | -1.206 | -2.796 | -2.398 | -1.488 | -2.404 | -3.905 | -4.981 | -2.885 | 15394     | HOXA1    | NM_010449_6_-1  |
| Hoxa2    | 1.228  | 0.381  | -4.163 | -4.185 | -1.633 | -3.590 | -3.939 | -4.982 | -4.981 | -4.342 | 15399     | HOXA2    | NM_010451_6_-1  |
| Hoxa3    | 0.820  | 0.633  | -2.512 | -3.260 | -0.783 | -0.692 | -2.354 | -2.909 | -4.981 | -4.981 | 15400     | HOXA3    | NM_010452_6_-1  |
| Hoxa5    | 2.541  | 2.418  | -0.942 | -2.341 | 1.129  | 0.654  | -1.173 | -3.232 | -4.981 | -4.981 | 15402     | HOXA5    | NM_010453_6_-1  |
| Hoxa6    | -3.843 | -2.895 | -4.951 | -4.851 | -3.793 | -4.076 | -4.748 | -4.849 | -4.981 | -4.981 | 15403     | HOXA6    | NM_010454_6_-1  |
| Hoxa7    | 5.517  | 5.244  | 1.933  | 0.540  | 3.900  | 3.538  | 2.384  | 0.571  | -4.981 | -3.229 | 15404     | HOXA7    | NM_010455_6_-1  |
| Hoxa9    | 1.406  | 1.265  | -4.239 | -3.611 | -3.400 | -3.272 | -4.961 | -4.149 | -4.981 | -4.981 | 15405     | HOXA9    | NM_010456_6_-1  |
| Hoxb3    | -4.981 | -1.820 | -4.620 | -4.784 | -2.617 | -4.477 | -3.040 | -4.233 | -2.230 | -2.115 | 15410     | HOXB3    | NM_010458_11_+1 |
| Hoxb4    | 0.321  | -0.022 | 0.467  | -0.618 | 0.510  | 0.083  | 0.406  | -0.227 | 0.539  | 0.664  | 15412     | HOXB4    | NM_010459_11_+1 |
| Hoxb7    | -2.573 | -2.060 | -4.960 | -4.960 | -3.624 | -3.171 | -4.718 | -4.469 | -4.981 | -4.981 | 15415     | HOXB7    | NM_010460_11_+1 |
| Hoxc6    | -3.090 | -4.981 | -4.976 | -4.769 | -3.808 | -3.775 | -4.821 | -4.716 | -4.981 | -4.981 | 15425     | HOXC6    | NM_010465_15_+1 |
| Hp1bp3   | 5.800  | 6.010  | 6.029  | 5.620  | 5.763  | 5.940  | 6.006  | 5.590  | 5.020  | 5.501  | 15441     | HP1BP3   | NM_010470_4_+1  |

|          |        |        |        |        |        |        |        |        |        |        |        |               |                     |
|----------|--------|--------|--------|--------|--------|--------|--------|--------|--------|--------|--------|---------------|---------------------|
| Hpca     | -4.981 | -4.981 | -4.878 | -4.918 | -4.968 | -4.956 | -4.975 | -4.971 | -4.981 | -4.874 | 15444  | HPCA          | NM_010471_4_-1      |
| Agfg1    | 4.397  | 4.432  | 5.428  | 5.345  | 5.176  | 5.209  | 5.229  | 5.350  | 6.008  | 6.229  | 15463  | AGFG1         | NM_010472_1_+1      |
| Hrc      | -4.981 | -4.981 | -4.176 | -4.970 | -4.262 | -4.940 | -4.973 | -4.964 | -4.981 | -4.316 | 15464  | NA            | NM_010473_7_+1      |
| Hs3st1   | 8.691  | 8.879  | 1.862  | 1.995  | -2.632 | 0.339  | 0.128  | 1.959  | -2.923 | -2.283 | 15476  | HS3ST1        | NM_010474_5_-1      |
| Hsd17b1  | -4.981 | -2.600 | -3.337 | -3.544 | -4.272 | -3.723 | -3.701 | -4.014 | -1.963 | -3.229 | 15485  | HSD17B1       | NM_010475_11_+1     |
| Hsd17b7  | 3.917  | 4.056  | 2.414  | 2.618  | 2.265  | 2.842  | 1.962  | 2.463  | 1.435  | 2.372  | 15490  | HSD17B7       | NM_010476_1_-1      |
| Hspd1    | 6.539  | 6.703  | 7.286  | 7.294  | 7.456  | 7.138  | 7.004  | 7.163  | 6.125  | 6.030  | 15510  | HSPD1         | NM_010477_1_-1      |
| Hspa1b   | 2.206  | 3.708  | 8.207  | 8.731  | 8.518  | 8.514  | 8.084  | 8.134  | 3.217  | 5.480  | 15511  | NA            | NM_010478_17_-1     |
| Hspa1a   | 1.643  | 2.929  | 7.737  | 8.298  | 8.109  | 8.018  | 7.637  | 7.734  | 3.207  | 5.072  | 193740 | HSPA1A HSPA1B | NM_010479_17_-1     |
| Hsp90aa1 | 9.012  | 9.164  | 8.834  | 8.805  | 9.676  | 9.393  | 9.144  | 8.929  | 6.953  | 7.194  | 15519  | HSP90AA1      | NM_010480_12_-1     |
| Hspa9    | 6.568  | 6.671  | 6.847  | 6.861  | 6.722  | 6.757  | 6.579  | 6.875  | 6.520  | 6.442  | 15526  | HSPA9         | NM_010481_18_-1     |
| Slc6a4   | -2.075 | -1.910 | -1.548 | -1.948 | -2.412 | -1.958 | 0.614  | -1.062 | -0.137 | 1.014  | 15567  | SLC6A4        | NM_010484_11_+1     |
| Elavl1   | 6.357  | 6.516  | 6.777  | 6.986  | 6.675  | 6.840  | 6.605  | 6.790  | 6.361  | 6.842  | 15568  | ELAVL1        | NM_010485_8_-1      |
| Elavl4   | -4.981 | -4.981 | -4.934 | -4.966 | -3.762 | -4.835 | -4.914 | -4.965 | -4.981 | -4.981 | 15572  | ELAVL4        | NM_010488_4_-1      |
| Hyal2    | 2.110  | 2.042  | 2.652  | 2.901  | 1.680  | 1.962  | 1.668  | 2.701  | 2.486  | 2.760  | 15587  | HYAL2         | NM_010489_9_+1      |
| Ica1     | -4.981 | -4.981 | -3.592 | -2.604 | -4.831 | -3.470 | -2.958 | -3.241 | 1.195  | -2.991 | 15893  | ICA1          | NM_010492_6_-1      |
| Icam1    | 6.629  | 6.369  | 8.384  | 8.569  | 8.416  | 8.308  | 8.044  | 8.007  | 7.315  | 7.983  | 15894  | ICAM1         | NM_010493_9_+1      |
| Icam2    | 5.407  | 4.453  | 3.368  | 2.989  | 4.174  | 3.717  | 4.622  | 4.960  | 4.653  | 4.477  | 15896  | ICAM2         | NM_010494_11_-1     |
| Id1      | -3.843 | -1.680 | -0.888 | -0.746 | -2.524 | -0.625 | 1.212  | 0.985  | 3.000  | 2.337  | 15901  | ID1           | NM_010495_2_+1      |
| Id2      | 5.772  | 4.618  | 11.106 | 11.258 | 9.581  | 9.367  | 8.556  | 9.132  | 7.609  | 8.073  | 15902  | ID2           | NM_010496_12_-1     |
| Idh1     | 4.799  | 5.028  | 6.284  | 6.775  | 4.377  | 4.001  | 6.204  | 6.326  | 8.903  | 8.495  | 15926  | IDH1          | NM_010497_1_+1      |
| Ids      | 3.894  | 4.178  | 4.969  | 5.023  | 5.665  | 5.735  | 5.926  | 5.754  | 6.306  | 6.933  | 15931  | IDS           | NM_010498_X_-1      |
| Ier2     | 7.140  | 7.992  | 8.411  | 8.705  | 9.381  | 10.158 | 9.418  | 9.535  | 9.616  | 9.801  | 15936  | IER2          | NM_010499_8_-1      |
| Ier5     | 9.273  | 9.548  | 9.634  | 9.455  | 10.138 | 10.230 | 9.339  | 9.127  | 8.786  | 8.725  | 15939  | IER5          | NM_010500_1_-1      |
| Ifit3    | 2.529  | 1.090  | 2.353  | 0.849  | 6.771  | 5.124  | 6.370  | 4.908  | 7.063  | 5.226  | 15959  | IFIT3         | NM_010501_19_+1     |
| Ifna1    | -2.948 | -4.981 | -4.970 | -4.970 | -4.981 | -4.981 | -4.903 | -4.853 | -4.981 | -4.981 | 15962  | IFNA4         | NM_010502_4_+1      |
| Ifna2    | -4.981 | -4.981 | -4.984 | -4.984 | -4.970 | -4.970 | -4.929 | -4.890 | -4.981 | -4.981 | 15965  | IFNA4         | NM_010503_4_-1      |
| Ifna5    | -4.981 | -4.981 | -4.984 | -4.984 | -4.981 | -4.981 | -4.888 | -4.835 | -4.981 | -4.981 | 15968  | IFNA4         | NM_010505_4_+1      |
| Ifna9    | -4.981 | -4.981 | -4.952 | -4.952 | -4.973 | -4.973 | -4.881 | -4.825 | -4.981 | -4.981 | 15972  | IFNA4         | NM_010507_4_-1      |
| Ifnar1   | 7.196  | 7.173  | 6.277  | 6.101  | 5.878  | 5.674  | 6.615  | 6.823  | 7.082  | 7.735  | 15975  | IFNAR1        | NM_010508_16_+1     |
| Ifnar2   | 7.182  | 7.480  | 5.285  | 5.288  | 6.177  | 5.980  | 6.233  | 6.394  | 6.880  | 7.051  | 15976  | IFNAR2        | NM_010509_16_+1     |
| Ifnb1    | -4.981 | -4.981 | -4.984 | -4.984 | -4.934 | -4.934 | -4.807 | -3.970 | -4.394 | -2.480 | 15977  | IFNB1         | NM_010510_4_-1      |
| Ifngr1   | 5.746  | 5.626  | 10.000 | 9.904  | 9.209  | 9.632  | 9.540  | 9.983  | 10.130 | 10.642 | 15979  | IFNGR1        | NM_010511_10_+1     |
| Igf1     | 1.914  | -0.561 | 0.391  | 0.828  | 1.139  | 0.672  | 1.544  | 1.295  | 0.016  | -0.625 | 16000  | IGF1          | NM_010512_10_+1     |
| Igf1r    | 4.008  | 3.592  | 1.355  | 1.180  | 0.991  | 0.653  | 2.967  | 2.462  | 3.005  | 2.849  | 16001  | IGF1R         | NM_010513_7_+1      |
| Igf2     | -4.813 | -4.981 | -4.946 | -4.076 | -4.975 | -3.465 | -4.980 | -4.980 | -4.981 | -4.981 | 16002  | IGF2          | NM_010514_7_-1      |
| Igf2r    | -4.981 | -1.972 | 4.074  | 3.173  | -2.925 | -1.008 | -0.011 | 1.082  | 0.913  | 0.443  | 16004  | IGF2R         | NM_010515_17_-1     |
| Igfbp4   | -0.608 | -0.408 | -0.542 | 1.000  | -0.922 | 2.635  | 0.750  | 4.206  | 3.527  | 3.873  | 16010  | IGFBP4        | NM_010517_11_+1     |
| Il18bp   | 2.704  | 0.535  | 2.428  | 2.981  | 2.727  | 2.496  | 2.498  | 2.571  | 1.718  | 1.045  | 16068  | IL18BP        | NM_010531_7_-1      |
| Ihh      | -1.340 | -2.883 | -2.557 | -2.759 | -4.818 | -4.359 | -3.203 | -4.165 | -1.803 | -1.209 | 16147  | IHH           | NM_010544_1_-1      |
| Cd74     | 14.976 | 14.743 | 14.377 | 14.420 | 14.810 | 14.568 | 14.560 | 14.555 | 10.642 | 10.451 | 16149  | CD74          | NM_010545_18_+1     |
| Ikbkb    | 2.390  | 2.291  | 2.548  | 2.354  | 2.501  | 3.164  | 3.037  | 2.723  | 4.459  | 3.995  | 16150  | IKBB          | NM_010546_8_-1      |
| Ikbkg    | 4.014  | 4.493  | 4.820  | 4.189  | 4.766  | 4.940  | 4.144  | 3.966  | 5.072  | 4.932  | 16151  | IKBKG         | NM_010547_X_+1      |
| Il10     | -1.818 | -2.895 | -2.802 | -1.248 | -1.848 | -1.610 | -1.583 | -0.887 | -3.189 | -1.115 | 16153  | IL10          | NM_010548_1_+1      |
| Il11ra1  | 1.272  | -0.217 | 1.827  | -1.672 | -2.302 | -2.594 | -3.395 | -1.845 | -3.883 | -0.958 | 16157  | IL11RA        | NM_010549_4_+1      |
| Il11ra2  | -1.367 | -1.541 | -4.991 | -3.668 | -4.953 | -4.953 | -4.981 | -4.980 | -4.981 | -4.981 | 16158  | IL11RA        | NM_010550_4_-1      |
| Il11ra2  | -1.930 | -3.879 | -4.976 | -4.218 | -4.978 | -4.978 | -4.981 | -4.980 | -4.981 | -4.981 | 16158  | IL11RA        | NM_010550_dup1_4_-2 |
| Il16     | 7.381  | 7.262  | 8.058  | 7.937  | 7.904  | 7.861  | 7.971  | 8.063  | 8.112  | 7.964  | 16170  | IL16          | NM_010551_7_-1      |
| Il18rap  | -1.487 | -4.981 | -0.558 | -1.450 | 0.676  | 0.394  | 3.205  | 1.952  | 1.795  | 0.810  | 16174  | IL18RAP       | NM_010553_1_+1      |
| Il1a     | 1.780  | -4.981 | 0.337  | -0.668 | 0.049  | -0.109 | 0.362  | 1.394  | -0.994 | -0.488 | 16175  | IL1A          | NM_010554_2_-1      |
| Il1r2    | -0.434 | 0.895  | -0.260 | 1.336  | 4.993  | 6.155  | 3.874  | 4.216  | 2.242  | -0.070 | 16178  | IL1R2         | NM_010555_1_+1      |
| Il6ra    | 3.116  | 3.286  | 4.761  | 4.632  | 5.827  | 5.968  | 6.443  | 6.289  | 7.561  | 7.507  | 16194  | IL6R          | NM_010559_3_-1      |
| Il6st    | 3.825  | 3.325  | 6.711  | 5.712  | 7.153  | 6.591  | 7.266  | 6.432  | 6.647  | 6.940  | 16195  | IL6ST         | NM_010560_13_+1     |
| Ilf3     | 2.969  | 3.272  | 2.811  | 2.811  | 3.375  | 2.496  | 2.613  | 1.121  | 2.172  | 2.564  | 16201  | ILF3          | NM_010561_9_+1      |
| Ilk      | 6.026  | 5.891  | 6.745  | 6.648  | 7.111  | 6.864  | 6.718  | 6.757  | 7.063  | 7.038  | 16202  | ILK           | NM_010562_7_+1      |
| Inpp5d   | 5.090  | 5.329  | 7.217  | 7.347  | 6.359  | 6.427  | 5.988  | 6.597  | 7.542  | 7.643  | 16331  | INPP5D        | NM_010566_1_+1      |
| Inpp1l   | 2.785  | 1.258  | -0.609 | -2.112 | 0.437  | -2.084 | 0.143  | -0.251 | 0.373  | 0.265  | 16332  | INPP1L        | NM_010567_7_-1      |
| Insr     | 5.162  | 5.340  | 4.395  | 4.478  | 4.656  | 4.666  | 4.780  | 4.789  | 5.323  | 5.284  | 16337  | INSR          | NM_010568_8_-1      |
| Invs     | 2.176  | 2.072  | 2.183  | 2.519  | 2.719  | 2.686  | 1.900  | 2.111  | 0.834  | 1.747  | 16348  | INVS          | NM_010569_4_+1      |
| Irs1     | -4.981 | -4.981 | -4.981 | -4.981 | -4.928 | -3.392 | -4.968 | -4.494 | -4.981 | -4.981 | 16367  | IRS1          | NM_010570_1_-1      |
| Irs3     | -4.981 | -4.981 | -3.061 | -4.075 | -4.058 | -3.982 | -2.833 | -3.129 | -3.750 | -2.526 | 16369  | NA            | NM_010571_5_-1      |
| Itga2b   | -0.372 | -1.272 | 0.271  | 1.368  | -0.433 | 0.271  | 2.232  | 0.158  | 2.472  | 2.642  | 16399  | ITGA2B        | NM_010575_11_-1     |
| Itga4    | 6.778  | 4.977  | 8.463  | 7.638  | 8.633  | 8.021  | 8.356  | 7.923  | 8.885  | 9.005  | 16401  | ITGA4         | NM_010576_2_+1      |
| Itga5    | 0.112  | -0.399 | 3.175  | 2.949  | 1.652  | 1.607  | 3.306  | 4.031  | 6.787  | 6.841  | 16402  | ITGA5         | NM_010577_15_-1     |
| Itgb1    | 6.290  | 6.715  | 8.438  | 8.368  | 7.348  | 7.789  | 8.212  | 8.566  | 8.832  | 9.438  | 16412  | ITGB1         | NM_010578_8_+1      |
| Eif6     | 7.320  | 7.402  | 7.116  | 7.228  | 7.076  | 7.089  | 7.038  | 7.115  | 6.956  | 6.715  | 16418  | EIF6          | NM_010579_2_-1      |
| Itgb5    | -4.519 | -4.354 | -3.054 | -3.681 | -2.451 | -4.771 | -1.864 | -1.237 | 1.774  | 1.471  | 16419  | ITGB5         | NM_010580_16_+1     |
| Cd47     | 10.488 | 10.659 | 9.060  | 9.040  | 9.534  | 9.751  | 9.465  | 9.676  | 9.411  | 9.513  | 16423  | CD47          | NM_010581_16_+1     |
| Itk      | -1.110 | 0.174  | -2.709 | -1.133 | -1.504 | 0.686  | 1.326  | 2.924  | -1.119 | -0.514 | 16428  | ITK           | NM_010583_11_-1     |
| Itln1    | -4.981 | -0.657 | -4.919 | -1.298 | -4.894 | 3.451  | -4.863 | 1.816  | -4.981 | -1.105 | 16429  | ITLN1         | NM_010584_1_-1      |
| Itpr1    | 6.801  | 7.037  | 6.688  | 6.586  | 6.571  | 6.482  | 5.970  | 5.872  | 5.940  | 5.628  | 16438  | ITPR1         | NM_010585_6_+1      |
| Itpr2    | 3.385  | -0.270 | 2.262  | -3.465 | 1.436  | -2.724 | 2.926  | -2.591 | 3.391  | -4.805 | 16439  | ITPR2         | NM_010586_6_-1      |
| Itsn1    | 0.809  | 0.293  | -1.604 | -2.215 | -1.890 | -2.171 | -2.002 | -2.138 | -1.132 | -1.829 | 16443  | ITSN1         | NM_010587_16_+1     |
| Jag2     | 1.108  | 0.704  | 1.658  | 0.930  | -2.211 | -2.188 | -1.555 | -1.930 | -2.679 | -2.954 | 16450  | JAG2          | NM_010588_12_-1     |

|         |        |        |        |        |        |        |        |        |        |        |        |         |                 |
|---------|--------|--------|--------|--------|--------|--------|--------|--------|--------|--------|--------|---------|-----------------|
| Jak3    | 3.288  | 3.226  | 2.571  | 1.301  | 3.966  | 3.965  | 3.600  | 3.530  | 3.438  | 3.756  | 16453  | JAK3    | NM_010589_8_+1  |
| Ajuba   | -2.572 | -1.483 | 1.280  | 0.167  | -0.476 | -1.046 | 0.216  | -0.477 | -1.732 | -3.742 | 16475  | AJUBA   | NM_010590_14_-1 |
| Jun     | 9.241  | 9.426  | 8.534  | 9.002  | 10.379 | 10.741 | 9.451  | 9.438  | 8.697  | 9.322  | 16476  | JUN     | NM_010591_4_-1  |
| Jund    | 6.911  | 7.049  | 6.730  | 6.671  | 7.006  | 7.303  | 6.928  | 7.147  | 7.094  | 6.852  | 16478  | JUND    | NM_010592_8_+1  |
| Jup     | 1.081  | 0.741  | 4.400  | 4.008  | 3.696  | 3.146  | 3.789  | 3.637  | 3.753  | 3.632  | 16480  | JUP     | NM_010593_11_-1 |
| Kcnab1  | -4.981 | -4.981 | -4.904 | -4.964 | -4.972 | -4.978 | -4.952 | -4.974 | -4.981 | -4.981 | 16497  | KCNAB1  | NM_010597_3_+1  |
| Kcnab2  | -0.773 | -1.047 | -1.762 | -3.066 | -3.325 | -4.678 | -2.403 | -2.487 | -1.903 | -0.167 | 16498  | KCNAB2  | NM_010598_4_-1  |
| Kcnab3  | -3.189 | -3.315 | -0.474 | -0.617 | -0.550 | -0.988 | 0.275  | 1.176  | 1.144  | 1.426  | 16499  | KCNAB3  | NM_010599_11_+1 |
| Kcnh3   | -4.981 | -4.981 | -2.652 | -2.161 | -1.763 | -1.316 | -4.927 | -0.955 | -4.981 | -4.981 | 16512  | KCNH3   | NM_010601_15_+1 |
| Kcnj11  | -4.981 | -4.981 | -4.981 | -4.981 | -4.981 | -4.981 | -4.978 | -4.941 | -4.981 | -4.981 | 16514  | KCNJ11  | NM_010602_7_-1  |
| Kcnj16  | -1.415 | -2.234 | -0.392 | -0.253 | -0.613 | -1.776 | 0.134  | -1.137 | -1.474 | -1.059 | 16517  | KCNJ16  | NM_010604_11_+1 |
| Kcnk3   | -1.853 | -3.408 | -4.981 | -4.981 | -2.942 | -3.484 | -2.585 | -2.909 | -2.753 | -2.747 | 16527  | KCNK3   | NM_010608_5_+1  |
| Kcnk7   | -3.090 | -3.315 | -3.969 | -3.080 | -3.107 | -4.566 | -3.595 | -3.968 | -2.069 | -3.758 | 16530  | KCNK7   | NM_010609_19_+1 |
| Kdr     | 4.796  | 3.964  | 2.788  | 2.140  | 0.818  | -1.422 | 1.927  | -0.201 | -1.754 | -0.561 | 16542  | KDR     | NM_010612_5_-1  |
| Khsrp   | 2.819  | 2.870  | 4.487  | 4.042  | 4.579  | 3.741  | 4.211  | 3.656  | 5.006  | 4.325  | 16549  | KHSRP   | NM_010613_17_-1 |
| Kif11   | -3.843 | -0.747 | 3.263  | 3.062  | 4.141  | 3.599  | 3.654  | 2.988  | 2.741  | 1.674  | 16551  | KIF11   | NM_010615_19_+1 |
| Kif13a  | 2.654  | 2.921  | 3.101  | 2.405  | 3.510  | 3.452  | 3.635  | 3.385  | 4.720  | 4.229  | 16553  | KIF13A  | NM_010617_13_-1 |
| Kif15   | 1.036  | 1.600  | 3.034  | 3.361  | 3.833  | 3.220  | 2.973  | 2.609  | 2.149  | 1.426  | 209737 | KIF15   | NM_010620_9_+1  |
| Kif17   | -4.981 | -4.981 | -1.080 | -1.398 | 1.119  | 0.820  | -0.427 | -2.064 | -4.981 | -4.227 | 16559  | KIF17   | NM_010623_4_+1  |
| Kif7    | -0.537 | -0.970 | -3.437 | -2.557 | -3.985 | -3.840 | -4.112 | -2.606 | -2.652 | -2.436 | 16576  | KIF7    | NM_010626_7_-1  |
| Kif9    | 2.101  | 2.014  | 3.082  | 2.579  | 3.147  | 3.168  | 2.562  | 1.900  | 1.982  | 2.247  | 16578  | KIF9    | NM_010628_9_+1  |
| Kifap3  | -2.594 | -2.810 | -0.831 | -1.553 | -1.330 | -1.405 | -1.877 | -1.595 | -0.807 | -1.651 | 16579  | KIFAP3  | NM_010629_1_+1  |
| Kifc2   | 1.202  | 1.321  | 0.431  | 0.030  | 0.957  | 1.041  | 0.324  | 0.876  | 0.905  | 1.529  | 16581  | KIFC2   | NM_010630_15_+1 |
| Kifc3   | -2.262 | -4.413 | -2.968 | -1.978 | -0.866 | -2.936 | -2.066 | 1.348  | 3.553  | 3.754  | 16582  | KIFC3   | NM_010631_8_-1  |
| Uhmk1   | 1.708  | 0.741  | 2.805  | 2.987  | 2.837  | 2.507  | 2.227  | 2.288  | 3.273  | 3.739  | 16589  | UHMK1   | NM_010633_1_-1  |
| Fabp5   | 5.240  | 4.645  | 4.339  | 5.363  | 8.012  | 7.672  | 8.474  | 7.391  | 5.492  | 5.847  | 16592  | FABP5   | NM_010634_3_+1  |
| Klf1    | -2.454 | 1.489  | -1.022 | 3.434  | 0.434  | 4.091  | 0.466  | 4.565  | -0.184 | 1.444  | 16596  | KLF1    | NM_010635_8_+1  |
| Klf12   | -4.981 | -4.981 | -0.304 | -0.119 | -1.994 | -0.325 | -2.652 | -0.334 | -3.925 | -4.981 | 16597  | KLF12   | NM_010636_14_-1 |
| Klf4    | 5.552  | 5.330  | 3.745  | 3.721  | 6.045  | 6.073  | 6.583  | 6.115  | 6.712  | 6.414  | 16600  | KLF4    | NM_010637_4_-1  |
| Klf9    | -0.995 | -0.794 | 0.471  | 1.170  | 0.770  | 1.113  | 2.090  | 1.792  | 4.246  | 3.550  | 16601  | KLF9    | NM_010638_19_+1 |
| Klk1    | 11.332 | 11.862 | -2.176 | 0.218  | -2.352 | 1.302  | -1.729 | 2.295  | -4.981 | -2.064 | 16612  | KLK3    | NM_010639_7_+1  |
| Klk1b11 | 0.032  | 0.081  | -4.966 | -4.631 | -4.161 | -2.971 | -3.882 | -4.851 | -4.394 | -4.981 | 16613  | KLK3    | NM_010640_7_+1  |
| Klk1b24 | -4.981 | -2.806 | -4.981 | -4.981 | -4.981 | -4.981 | -4.981 | -4.981 | -4.981 | -4.981 | 16617  | KLK3    | NM_010643_7_+1  |
| Klk1b1  | 0.063  | 0.631  | -4.981 | -4.981 | -4.981 | -4.981 | -4.981 | -4.981 | -4.981 | -4.981 | 16623  | KLK3    | NM_010645_7_+1  |
| Klra12  | -3.376 | -4.335 | -4.880 | -4.016 | -4.967 | -3.708 | -3.338 | -4.535 | -4.981 | -4.981 | 16630  | NA      | NM_010646_6_-1  |
| Klra3   | -2.178 | -4.263 | 1.687  | -2.643 | 1.461  | -4.611 | -0.229 | -4.891 | -4.601 | -4.843 | 16634  | NA      | NM_010648_6_-1  |
| Klra4   | -4.981 | 1.463  | -2.965 | -3.734 | -4.401 | -3.225 | -4.777 | -2.861 | -4.134 | -4.981 | 16635  | NA      | NM_010649_6_-1  |
| Klra8   | -0.995 | 0.419  | -1.849 | -0.526 | -4.049 | -3.867 | -1.814 | -4.331 | -1.859 | -2.133 | 16639  | NA      | NM_010650_6_-1  |
| Klra9   | -2.739 | 2.947  | -2.411 | 0.826  | -3.464 | 0.258  | -1.700 | -0.312 | -2.177 | -1.302 | 16640  | NA      | NM_010651_6_-1  |
| Klrc1   | -1.446 | -1.010 | -4.827 | -4.597 | -2.761 | -2.720 | -2.631 | -4.954 | -4.972 | -4.981 | 16641  | KLRC1   | NM_010652_6_-1  |
| Klrc2   | -1.762 | -3.903 | -4.487 | -4.530 | -4.954 | -4.904 | -4.589 | -4.371 | -4.635 | -4.981 | 16642  | NA      | NM_010653_6_-1  |
| Klrd1   | 9.090  | 9.262  | 6.066  | 4.422  | 7.772  | 7.929  | 7.414  | 5.852  | 1.399  | 0.401  | 16643  | KLRD1   | NM_010654_6_+1  |
| Kpna2   | 5.064  | 4.089  | 5.643  | 5.882  | 6.227  | 5.671  | 6.217  | 5.951  | 7.126  | 5.784  | 16647  | KPNA2   | NM_010655_11_-1 |
| Sspn    | -4.981 | -4.981 | -4.909 | -4.566 | -4.973 | -4.763 | -2.992 | -1.473 | -4.981 | -4.981 | 16651  | SSPN    | NM_010656_6_+1  |
| Hivep3  | 4.357  | 3.881  | 2.233  | 2.308  | 2.259  | 2.153  | 1.642  | 2.534  | 3.543  | 4.232  | 16656  | HIVEP3  | NM_010657_4_+1  |
| Mafb    | 2.131  | 0.566  | 1.418  | 1.911  | 2.714  | 2.600  | 4.783  | 6.553  | 7.280  | 7.716  | 16658  | MAFB    | NM_010658_2_-1  |
| Krt10   | 3.167  | 3.281  | 0.641  | 1.747  | 1.829  | 1.709  | 1.905  | 1.538  | -0.279 | 0.977  | 16661  | NA      | NM_010660_11_-1 |
| Krt13   | -4.981 | -4.981 | -2.729 | -1.891 | -4.981 | -4.981 | -4.981 | -4.981 | -4.981 | -4.981 | 16663  | KRT13   | NM_010662_11_-1 |
| Krt18   | -4.981 | -4.981 | -0.113 | -1.765 | -2.317 | -1.883 | -1.244 | -0.807 | -3.823 | -4.981 | 16668  | KRT18   | NM_010664_15_+1 |
| Krt86   | -4.981 | -4.981 | -4.954 | -4.378 | -4.952 | -4.516 | -4.943 | -4.962 | -1.587 | -2.516 | 16679  | KRT86   | NM_010667_15_+1 |
| Lama3   | -1.627 | -0.445 | -4.981 | -4.981 | -4.981 | -4.981 | -3.745 | -4.943 | -4.981 | -4.981 | 16774  | LAMA3   | NM_010680_18_+1 |
| Lama4   | -4.981 | -4.981 | -4.981 | -4.981 | -4.967 | -4.065 | -4.938 | -4.346 | -4.981 | -4.981 | 16775  | LAMA4   | NM_010681_10_+1 |
| Lamc1   | 1.385  | 2.610  | 0.081  | 1.502  | 1.049  | 2.042  | -1.517 | 2.084  | 0.591  | 2.955  | 226519 | LAMC1   | NM_010683_1_-1  |
| Lamp1   | 8.276  | 8.536  | 7.989  | 8.209  | 8.338  | 8.557  | 9.299  | 9.750  | 10.727 | 11.091 | 16783  | LAMP1   | NM_010684_8_+1  |
| Lamp2   | 6.749  | 6.890  | 6.004  | 5.996  | 5.624  | 6.051  | 6.560  | 7.195  | 8.575  | 9.290  | 16784  | LAMP2   | NM_010685_X_-1  |
| Laptm5  | 10.356 | 10.526 | 10.606 | 10.789 | 11.210 | 10.967 | 11.170 | 11.225 | 11.569 | 11.536 | 16792  | LAPTM5  | NM_010686_4_+1  |
| Large1  | 2.178  | 2.444  | 0.414  | 1.642  | 0.375  | 1.584  | 0.573  | 0.646  | -1.388 | 0.596  | 16795  | LARGE1  | NM_010687_8_-1  |
| Lasp1   | 4.804  | 4.554  | 7.425  | 7.343  | 7.757  | 7.510  | 7.420  | 7.064  | 7.791  | 7.422  | 16796  | LASP1   | NM_010688_11_+1 |
| Lat     | 2.702  | 1.436  | -1.808 | 0.798  | 0.033  | 1.620  | 1.377  | 3.379  | -0.069 | -0.466 | 16797  | LAT     | NM_010689_7_-1  |
| Lats1   | 3.755  | 3.583  | 4.421  | 3.981  | 4.145  | 3.961  | 4.185  | 3.915  | 4.327  | 4.448  | 16798  | LATS1   | NM_010690_10_+1 |
| Lbx2    | -4.981 | -4.981 | -4.338 | -3.108 | -4.969 | -3.395 | -4.614 | -4.298 | -2.659 | -2.923 | 16815  | LBX2    | NM_010692_6_+1  |
| Lck     | -0.051 | 0.434  | -1.409 | -0.580 | 0.051  | 0.470  | -0.441 | 1.336  | -4.674 | -4.622 | 16818  | LCK     | NM_010693_4_-1  |
| Lcn4    | -4.981 | -4.981 | -4.844 | -3.467 | -4.867 | -2.725 | -4.955 | -3.278 | -4.981 | -4.981 | 16821  | NA      | NM_010695_2_-1  |
| Lcp2    | 4.516  | 3.679  | 6.920  | 5.564  | 8.353  | 6.618  | 8.125  | 6.310  | 8.669  | 7.160  | 16822  | LCP2    | NM_010696_11_+1 |
| Ldb1    | -4.706 | 0.557  | -2.029 | -1.681 | -2.911 | -2.121 | -0.949 | -2.196 | -1.199 | -0.993 | 16825  | LDB1    | NM_010697_19_-1 |
| Ldb2    | -4.981 | -4.981 | -4.959 | -4.959 | -4.729 | -1.872 | -4.931 | -2.820 | -4.981 | -4.981 | 16826  | LDB2    | NM_010698_5_-1  |
| Ldha    | 9.195  | 9.016  | 10.024 | 9.914  | 9.227  | 9.291  | 9.057  | 9.296  | 8.816  | 8.625  | 16828  | LDHA    | NM_010699_7_+1  |
| Ldlr    | 4.739  | 5.091  | 3.936  | 2.439  | 3.413  | 2.569  | 4.818  | 5.425  | 7.785  | 7.423  | 16835  | LDLR    | NM_010700_9_+1  |
| Lef1    | -4.453 | -4.248 | -2.998 | 0.367  | -0.664 | 0.943  | 0.422  | 2.018  | -2.309 | -1.728 | 16842  | LEF1    | NM_010703_3_+1  |
| Lepr    | -4.981 | -4.981 | -4.847 | -4.973 | -4.966 | -3.502 | -4.942 | -4.950 | -4.981 | -4.981 | 16847  | LEPR    | NM_010704_4_+1  |
| Lgals3  | 5.271  | 8.174  | 8.681  | 7.796  | 5.427  | 6.357  | 7.774  | 7.969  | 9.297  | 9.403  | 16854  | LGALS3  | NM_010705_14_+1 |
| Lgals4  | 4.879  | 5.162  | 0.941  | 1.287  | 1.741  | 1.504  | 0.488  | 1.220  | 1.020  | 0.785  | 16855  | LGALS4  | NM_010706_7_+1  |
| Lgals6  | -2.922 | -4.981 | -4.939 | -4.965 | -4.918 | -4.977 | -4.384 | -4.918 | -4.981 | -4.975 | 16857  | NA      | NM_010707_7_+1  |
| Lgals9  | 1.980  | 1.566  | -0.086 | -1.703 | 0.593  | -0.311 | 1.284  | 1.293  | 2.191  | 1.298  | 16859  | LGALS9B | NM_010708_11_-1 |

|          |        |        |        |        |        |        |        |        |        |        |        |          |                 |
|----------|--------|--------|--------|--------|--------|--------|--------|--------|--------|--------|--------|----------|-----------------|
| Eif2d    | -2.413 | -0.755 | -3.744 | -2.458 | -3.666 | -1.005 | -3.556 | -2.059 | -4.981 | -4.974 | 16865  | EIF2D    | NM_010709_1_+1  |
| Lhx2     | -4.981 | -4.981 | -4.750 | -4.852 | -3.642 | -3.503 | -4.584 | -4.326 | -4.981 | -4.981 | 16870  | LHX2     | NM_010710_2_+1  |
| Lig1     | 1.090  | 1.791  | 4.143  | 4.614  | 4.954  | 4.565  | 4.640  | 4.484  | 2.709  | 2.000  | 16881  | LIG1     | NM_010715_7_+1  |
| Lig3     | 1.638  | 2.146  | 2.364  | 3.555  | 2.109  | 3.130  | 1.977  | 2.144  | 2.367  | 3.146  | 16882  | LIG3     | NM_010716_11_+1 |
| Limk1    | 0.562  | -0.256 | 0.580  | -0.713 | 0.922  | 0.083  | -0.277 | -0.171 | 0.952  | 1.864  | 16885  | LIMK1    | NM_010717_5_-1  |
| Limk2    | 3.666  | 3.702  | 4.900  | 4.883  | 4.295  | 4.029  | 4.067  | 3.970  | 4.149  | 3.769  | 16886  | LIMK2    | NM_010718_11_-1 |
| Lipe     | 2.342  | 2.642  | 4.068  | 4.016  | 4.302  | 4.112  | 4.098  | 3.337  | 4.196  | 3.939  | 16890  | LIPE     | NM_010719_7_-1  |
| Lipg     | -4.981 | -4.981 | -4.528 | -3.770 | -4.960 | -4.719 | -4.684 | -4.779 | -0.803 | -4.981 | 16891  | LIPG     | NM_010720_18_-1 |
| Lmnb1    | 3.558  | 3.855  | 5.633  | 5.518  | 5.687  | 5.468  | 4.805  | 4.561  | 4.782  | 4.270  | 16906  | LMNB1    | NM_010721_18_+1 |
| Lmnb2    | 3.387  | 3.404  | 2.928  | 3.101  | 3.201  | 3.130  | 2.788  | 2.979  | 2.516  | 1.909  | 16907  | LMNB2    | NM_010722_10_-1 |
| Lmo4     | 4.161  | 4.460  | 4.857  | 5.279  | 4.318  | 4.217  | 5.665  | 4.981  | 5.930  | 5.314  | 16911  | LMO4     | NM_010723_3_-1  |
| Psmb8    | 10.445 | 10.302 | 10.755 | 10.891 | 9.916  | 9.824  | 9.907  | 9.949  | 8.991  | 8.572  | 16913  | PSMB8    | NM_010724_17_+1 |
| Phyh     | 6.272  | 6.029  | 6.186  | 6.348  | 5.771  | 5.759  | 6.212  | 6.246  | 6.521  | 6.627  | 16922  | PHYH     | NM_010726_2_+1  |
| Lnrx1    | -4.921 | -4.772 | -3.418 | -3.871 | -2.577 | -3.120 | -4.124 | -4.095 | -4.981 | -1.949 | 16924  | LNK1     | NM_010727_5_-1  |
| Lox      | -4.981 | -4.981 | -4.981 | -4.981 | -4.981 | -4.981 | -4.808 | -3.064 | -4.926 | -1.176 | 16948  | LOX      | NM_010728_18_-1 |
| Anxa1    | 1.255  | 1.355  | 7.984  | 7.918  | 6.443  | 7.039  | 7.435  | 8.313  | 9.602  | 9.839  | 16952  | ANXA1    | NM_010730_19_-1 |
| Zbtb7a   | 5.550  | 5.336  | 6.030  | 5.909  | 5.826  | 5.767  | 6.015  | 5.982  | 6.621  | 6.518  | 16969  | ZBTB7A   | NM_010731_10_+1 |
| Lrrn3    | -4.164 | -0.507 | -2.299 | -4.510 | -2.136 | -3.992 | -3.857 | -1.121 | -1.689 | -2.177 | 16981  | LRRN3    | NM_010733_12_-1 |
| Lst1     | 4.934  | 3.811  | 5.565  | 5.580  | 7.862  | 8.022  | 9.147  | 9.023  | 8.660  | 8.363  | 16988  | NA       | NM_010734_17_-1 |
| Lta      | 1.862  | -0.482 | 2.268  | 1.158  | 3.941  | 4.362  | 0.860  | 2.658  | -1.825 | -1.776 | 16992  | LTA      | NM_010735_17_-1 |
| Ltbr     | 3.976  | 3.990  | 5.009  | 5.250  | 4.932  | 4.809  | 5.486  | 5.753  | 6.910  | 6.995  | 17000  | LTBR     | NM_010736_6_-1  |
| Klr1a    | -0.486 | -2.681 | -3.441 | -4.520 | -4.852 | -4.096 | -1.263 | -3.629 | -4.711 | -4.981 | 17057  | KLRB1    | NM_010737_6_-1  |
| Ly6a     | 9.561  | 6.949  | 4.033  | 3.729  | 2.170  | -2.284 | 3.963  | -0.415 | 0.064  | -3.092 | 110454 | NA       | NM_010738_15_-1 |
| Muc13    | -4.981 | -4.981 | -4.897 | -0.913 | -2.056 | -1.621 | -4.865 | -2.460 | -4.394 | -1.178 | 17063  | MUC13    | NM_010739_16_+1 |
| Cd93     | 1.183  | -0.507 | -0.581 | -0.417 | 0.092  | 1.068  | 3.413  | 6.750  | 6.280  | 8.800  | 17064  | CDC93    | NM_010740_2_-1  |
| Ly6c1    | 3.182  | 9.842  | -1.029 | 3.258  | -1.606 | 0.743  | -0.429 | 2.907  | 1.054  | 7.583  | 17067  | NA       | NM_010741_15_-1 |
| Ly6d     | 12.049 | 8.963  | 1.817  | 3.525  | 2.949  | 4.143  | 4.711  | 5.868  | 0.156  | 0.428  | 17068  | LY6D     | NM_010742_15_-1 |
| Il1rl1   | -4.981 | -4.981 | -4.978 | -4.935 | -4.981 | -4.981 | -4.931 | -4.957 | -4.848 | -4.981 | 17082  | IL1RL1   | NM_010743_1_+1  |
| Tmed1    | 5.601  | 6.009  | 3.465  | 4.301  | 4.128  | 4.030  | 3.859  | 4.252  | 3.298  | 3.673  | 17083  | TMED1    | NM_010744_9_-1  |
| Ly86     | 10.347 | 10.348 | 8.618  | 8.471  | 9.079  | 9.211  | 8.953  | 9.359  | 8.792  | 8.832  | 17084  | LY86     | NM_010745_13_+1 |
| Ncr1     | 0.348  | -4.981 | -2.479 | -2.012 | -4.835 | -0.119 | -0.839 | 1.147  | -1.379 | -4.981 | 17086  | NCR1     | NM_010746_7_+1  |
| Lyn      | 6.575  | 6.384  | 6.538  | 6.246  | 7.050  | 7.026  | 7.398  | 7.474  | 8.331  | 8.353  | 17096  | LYN      | NM_010747_4_+1  |
| Lyst     | 4.524  | 4.169  | 5.999  | 5.734  | 7.997  | 7.843  | 6.788  | 5.736  | 5.934  | 5.714  | 17101  | LYST     | NM_010748_13_+1 |
| M6pr     | 8.318  | 8.209  | 8.968  | 9.195  | 9.374  | 9.500  | 8.640  | 8.591  | 8.344  | 8.272  | 17113  | M6PR     | NM_010749_6_+1  |
| Mab21l1  | -4.981 | -4.981 | -4.981 | -4.981 | -4.988 | -4.065 | -4.341 | -4.935 | -4.981 | -4.981 | 17116  | MAB21L1  | NM_010750_3_+1  |
| Mxd1     | 4.615  | 4.543  | 6.464  | 6.573  | 6.741  | 6.694  | 5.908  | 5.405  | 5.138  | 4.383  | 17119  | MXD1     | NM_010751_6_-1  |
| Mad1l1   | 2.916  | 3.528  | 2.766  | 3.469  | 3.469  | 3.623  | 3.946  | 3.976  | 4.681  | 4.466  | 17120  | MAD1L1   | NM_010752_5_-1  |
| Mxd4     | 5.532  | 6.411  | 4.629  | 5.356  | 4.395  | 5.269  | 4.071  | 4.970  | 3.571  | 4.482  | 17122  | MXD4     | NM_010753_5_-1  |
| Smad2    | 5.950  | 5.961  | 6.211  | 6.124  | 5.983  | 5.996  | 6.120  | 6.055  | 6.307  | 6.395  | 17126  | SMAD2    | NM_010754_18_+1 |
| Maff     | -1.569 | 0.804  | 0.160  | 0.010  | 2.123  | 2.835  | 2.127  | 1.335  | -2.809 | -1.474 | 17133  | MAFF     | NM_010755_15_+1 |
| Mafg     | 3.171  | 3.330  | 3.257  | 3.530  | 2.975  | 3.447  | 3.762  | 3.775  | 5.049  | 4.708  | 17134  | MAFG     | NM_010756_11_-1 |
| Mafk     | 5.412  | 5.699  | 5.233  | 5.534  | 5.063  | 5.703  | 5.033  | 5.768  | 6.026  | 5.941  | 17135  | MAFK     | NM_010757_5_+1  |
| Mag      | -1.529 | -2.344 | -2.723 | -2.500 | -3.280 | -3.943 | -1.440 | -0.404 | 0.836  | -0.696 | 17136  | MAG      | NM_010758_7_-1  |
| Ccndbp1  | 7.021  | 6.860  | 7.588  | 7.711  | 6.527  | 6.481  | 6.272  | 6.383  | 6.138  | 5.968  | 17151  | CCNDBP1  | NM_010761_2_+1  |
| Mal      | -4.981 | -4.981 | -4.964 | -4.974 | -4.981 | -4.981 | -3.906 | -3.495 | -4.981 | -4.981 | 17153  | MAL      | NM_010762_2_-1  |
| Man1a2   | 6.086  | 6.560  | 6.146  | 5.849  | 4.591  | 4.873  | 4.955  | 5.109  | 4.981  | 5.519  | 17156  | MAN1A2   | NM_010763_3_-1  |
| Man2b1   | 7.046  | 6.352  | 9.778  | 9.553  | 9.122  | 9.010  | 8.770  | 8.982  | 9.611  | 9.548  | 17159  | MAN2B1   | NM_010764_8_+1  |
| Mapkapk5 | 4.704  | 4.473  | 4.112  | 4.217  | 4.393  | 4.319  | 4.228  | 4.228  | 4.228  | 4.127  | 17165  | MAPKAPK5 | NM_010765_5_-1  |
| Marco    | 2.181  | -1.402 | 0.264  | 0.993  | 0.749  | 0.099  | 0.964  | 2.641  | -3.109 | -0.904 | 17167  | MARCO    | NM_010766_1_-1  |
| Masp2    | -3.563 | 0.050  | -3.694 | -1.622 | -4.708 | -1.749 | -4.949 | -3.361 | -4.981 | -3.058 | 17175  | MASP2    | NM_010767_4_+1  |
| Matk     | -4.597 | 0.202  | 0.958  | 1.735  | -0.984 | 0.800  | 1.336  | 0.933  | 1.297  | 1.401  | 17179  | MATK     | NM_010768_10_+1 |
| Matn1    | -4.981 | -4.981 | -4.183 | -1.843 | 0.011  | -0.542 | -1.309 | -1.626 | -4.981 | -4.981 | 17180  | MATN1    | NM_010769_4_+1  |
| Matr3    | 7.128  | 7.177  | 7.099  | 6.892  | 7.351  | 7.418  | 7.266  | 7.220  | 6.688  | 7.096  | 17184  | MATR3    | NM_010771_18_+1 |
| Maz      | 3.022  | 2.912  | 3.993  | 4.209  | 4.108  | 3.894  | 3.710  | 3.977  | 4.320  | 4.348  | 17188  | MAZ      | NM_010772_7_-1  |
| Mbd2     | 6.712  | 6.732  | 6.775  | 6.827  | 6.639  | 6.671  | 6.471  | 6.701  | 7.098  | 6.987  | 17191  | MBD2     | NM_010773_18_+1 |
| Mbd4     | 2.703  | 2.709  | 3.618  | 4.029  | 3.834  | 4.054  | 3.996  | 3.987  | 3.253  | 3.879  | 17193  | MBD4     | NM_010774_6_-1  |
| Mbp      | -4.981 | -1.896 | -2.101 | 0.263  | -0.637 | -3.452 | -3.088 | -2.453 | 0.419  | -2.010 | 17196  | MBP      | NM_010777_18_+1 |
| Cd46     | -2.362 | -0.844 | -1.594 | -2.664 | -2.087 | -2.072 | -2.655 | -1.762 | -1.397 | -0.126 | 17221  | CD46     | NM_010778_1_-1  |
| Mdk      | -4.981 | -2.441 | -2.527 | -1.288 | 1.355  | 0.587  | -2.116 | -4.147 | -4.977 | -4.981 | 17242  | MDK      | NM_010784_2_-1  |
| Mdm1     | -4.097 | -0.164 | -0.912 | -0.368 | -1.187 | -2.303 | 2.408  | 0.786  | 3.899  | 3.153  | 17245  | MDM1     | NM_010785_10_+1 |
| Mdm2     | 5.420  | 5.358  | 5.502  | 5.478  | 4.988  | 5.289  | 5.231  | 5.382  | 6.037  | 6.147  | 17246  | MDM2     | NM_010786_10_-1 |
| Mea1     | 3.842  | 3.601  | 2.923  | 2.812  | 2.890  | 2.941  | 3.342  | 2.628  | 1.954  | 1.815  | 17256  | MEA1     | NM_010787_17_+1 |
| Mecp2    | 4.621  | 4.615  | 4.396  | 4.339  | 5.005  | 4.735  | 4.889  | 4.546  | 4.732  | 4.517  | 17257  | MECP2    | NM_010788_X_-1  |
| Meis1    | 1.790  | 1.371  | 0.244  | -1.483 | 1.393  | 1.675  | 1.980  | 0.304  | 0.864  | 1.123  | 17268  | NA       | NM_010789_11_-1 |
| Melk     | -2.030 | 2.967  | 3.065  | 4.027  | 3.783  | 3.024  | 3.032  | 2.243  | 0.623  | 1.233  | 17279  | MELK     | NM_010790_4_+1  |
| Meox1    | -4.981 | -4.981 | -4.981 | -4.981 | -4.981 | -4.981 | -4.981 | -4.981 | -1.690 | -4.981 | 17285  | MEOX1    | NM_010791_11_-1 |
| Mettl1   | 4.148  | 3.698  | 3.380  | 3.360  | 2.687  | 3.047  | 2.838  | 2.967  | 1.839  | 1.446  | 17299  | METTL1   | NM_010792_10_+1 |
| Mgat1    | -0.524 | 0.738  | 0.424  | 0.014  | 0.530  | 0.194  | 0.814  | 0.060  | 2.684  | 1.062  | 17308  | MGAT1    | NM_010794_11_+1 |
| Mgat3    | -4.981 | -4.981 | -4.981 | -4.981 | -4.923 | -4.222 | -4.953 | -1.698 | -4.981 | -4.981 | 17309  | MGAT3    | NM_010795_15_+1 |
| Clec10a  | 7.739  | 8.403  | 0.967  | 1.617  | -1.012 | 1.929  | 5.222  | 5.879  | 4.152  | 3.948  | 17312  | CLEC10A  | NM_010796_11_+1 |
| Mid1     | -4.504 | -4.501 | -4.721 | -4.721 | -4.227 | -4.599 | -4.015 | -3.871 | -1.813 | -3.959 | 17318  | MID1     | NM_010797_X_+1  |
| Mif      | 7.257  | 6.989  | 6.765  | 6.855  | 6.666  | 7.099  | 6.927  | 7.045  | 4.863  | 4.494  | 17319  | MIF      | NM_010798_10_-1 |
| Minpp1   | 5.601  | 5.794  | 4.812  | 5.173  | 4.602  | 5.238  | 4.742  | 5.612  | 5.217  | 5.051  | 17330  | MINPP1   | NM_010799_19_+1 |
| Bhlha15  | 2.885  | 3.054  | -3.707 | -2.782 | -3.145 | -3.325 | -1.622 | 0.818  | -4.981 | -4.981 | 17341  | BHLHA15  | NM_010800_5_+1  |

|          |        |        |        |        |        |        |        |        |        |        |           |          |                 |
|----------|--------|--------|--------|--------|--------|--------|--------|--------|--------|--------|-----------|----------|-----------------|
| Mlf1     | -2.451 | -0.664 | -1.604 | -0.801 | -0.386 | 0.567  | -1.513 | -2.053 | -3.925 | -2.984 | 17349     | MLF1     | NM_010801_3_+1  |
| Mllt10   | -3.433 | -2.662 | 0.826  | 0.737  | -1.415 | -0.416 | -1.115 | -2.063 | 0.529  | 1.902  | 17354     | MLLT10   | NM_010804_2_+1  |
| Afdn     | 3.193  | 4.547  | 4.786  | 5.494  | 5.967  | 6.617  | 5.141  | 5.375  | 4.993  | 5.184  | 17356     | AFDN     | NM_010806_17_+1 |
| Marcksl1 | 2.476  | 0.773  | 7.065  | 8.042  | 7.773  | 7.172  | 7.622  | 7.469  | 5.580  | 6.397  | 17357     | MARCKSL1 | NM_010807_4_+1  |
| Mmp24    | -0.801 | 0.664  | -0.894 | 0.022  | -1.484 | -0.740 | -1.370 | -1.593 | -1.017 | -0.002 | 17391     | MMP24    | NM_010808_2_+1  |
| Mmp7     | -4.981 | -4.981 | -0.987 | 0.527  | -1.542 | -0.466 | 0.476  | -4.351 | -4.981 | -4.981 | 17393     | MMP7     | NM_010810_9_+1  |
| Ndst2    | 4.226  | 3.836  | 5.534  | 5.409  | 4.880  | 4.864  | 5.308  | 5.632  | 6.918  | 6.753  | 17423     | NDST2    | NM_010811_14_-1 |
| Mnt      | 2.312  | 2.451  | 2.894  | 2.395  | 3.202  | 2.909  | 3.251  | 2.989  | 3.741  | 3.321  | 17428     | MNT      | NM_010813_11_+1 |
| Grap2    | 0.171  | -4.202 | 3.048  | 2.940  | -0.156 | -0.282 | 1.644  | 1.740  | -4.788 | -0.251 | 17444     | GRAP2    | NM_010815_15_+1 |
| Psmd7    | 7.030  | 7.161  | 6.567  | 7.032  | 6.413  | 6.471  | 6.429  | 6.598  | 6.009  | 6.021  | 17463     | PSMD7    | NM_010817_8_-1  |
| Cd200    | 6.486  | 7.005  | 4.776  | 5.196  | 4.096  | 4.201  | 2.742  | 3.617  | -4.981 | -1.298 | 17470     | CD200    | NM_010818_16_-1 |
| Clec4d   | -1.818 | -2.437 | -4.596 | -1.211 | -2.711 | -0.344 | 0.238  | 1.374  | 2.936  | 3.610  | 17474     | CLEC4D   | NM_010819_6_+1  |
| Mpeg1    | 9.673  | 10.562 | 9.508  | 10.919 | 3.963  | 5.805  | 7.258  | 9.590  | 8.418  | 12.113 | 17476     | MPEG1    | NM_010821_19_+1 |
| Mpg      | 5.632  | 5.361  | 3.884  | 3.895  | 3.924  | 4.082  | 3.834  | 4.042  | 4.074  | 3.866  | 268395    | MPG      | NM_010822_11_+1 |
| Mpl      | -2.428 | -4.742 | -3.174 | -0.522 | -3.817 | -4.887 | -4.921 | -4.027 | -1.695 | -1.225 | 17480     | MPL      | NM_010823_4_-1  |
| Mpo      | -4.981 | -3.315 | -4.975 | -0.468 | -4.940 | 5.233  | 0.155  | 5.921  | 6.480  | 0.834  | 17523     | MPO      | NM_010824_11_+1 |
| Mrv1     | -0.059 | 1.126  | 2.088  | 0.892  | -1.393 | 0.162  | -1.700 | -0.733 | -2.025 | -1.063 | 17540     | MRV1     | NM_010826_7_-1  |
| Msc      | -3.349 | -4.981 | -4.002 | -3.559 | -2.592 | -1.607 | -4.916 | -3.394 | -4.981 | -4.981 | 17681     | MSC      | NM_010827_1_-1  |
| Cited2   | 4.147  | 4.058  | 5.508  | 5.417  | 5.164  | 5.328  | 5.336  | 5.513  | 6.271  | 6.080  | 17684     | CITED2   | NM_010828_10_+1 |
| Msh3     | 3.697  | 3.868  | 2.694  | 2.651  | 2.966  | 2.807  | 2.994  | 3.468  | 3.778  | 3.636  | 17686     | MSH3     | NM_010829_13_-1 |
| Msh6     | 4.206  | 3.990  | 4.890  | 4.799  | 4.923  | 4.747  | 4.688  | 4.505  | 3.572  | 3.847  | 17688     | MSH6     | NM_010830_17_+1 |
| Sik1     | 7.019  | 7.528  | 6.279  | 6.183  | 5.629  | 5.929  | 5.479  | 6.168  | 7.066  | 7.073  | 17691     | NA       | NM_010831_17_-1 |
| Msl3     | 5.275  | 5.474  | 4.783  | 4.808  | 4.601  | 4.597  | 4.677  | 4.828  | 4.695  | 4.875  | 17692     | MSL3     | NM_010832_X_-1  |
| Msn      | 7.425  | 7.437  | 8.308  | 8.227  | 8.826  | 8.655  | 9.493  | 9.711  | 11.327 | 11.392 | 17698     | MSN      | NM_010833_X_+1  |
| Map6     | -4.981 | -4.981 | -4.981 | -4.981 | -4.981 | -4.981 | -3.867 | -4.913 | -4.981 | -4.981 | 17760     | MAP6     | NM_010837_7_+1  |
| Cmc4     | 3.124  | 2.760  | 1.244  | 0.925  | 0.933  | 0.938  | 0.660  | -0.285 | 0.895  | -2.585 | 105886298 | NA       | NM_010839_X_-1  |
| Mthfr    | 1.806  | 1.098  | 1.695  | 1.689  | 2.305  | 1.035  | 2.317  | 1.175  | 3.094  | 2.813  | 17769     | MTHFR    | NM_010840_4_+1  |
| Muc5ac   | 0.975  | 1.596  | -4.986 | -2.849 | -4.981 | -4.981 | -4.949 | -4.469 | -4.981 | -4.981 | 17833     | MUC5AC   | NM_010844_7_+1  |
| Mx1      | 3.936  | 3.984  | 5.618  | 4.981  | 4.543  | 3.511  | 4.706  | 4.039  | 5.531  | 4.532  | 17857     | NA       | NM_010846_16_-1 |
| Mxi1     | 3.417  | 3.468  | 3.039  | 2.426  | 2.684  | 2.899  | 3.469  | 3.400  | 4.251  | 4.375  | 17859     | MXI1     | NM_010847_19_+1 |
| Myb      | 5.135  | 4.737  | 3.494  | 3.732  | 2.065  | 2.098  | 0.461  | 1.876  | 1.361  | 1.118  | 17863     | MYB      | NM_010848_10_-1 |
| Myc      | 0.174  | -1.678 | 2.686  | 3.274  | 3.297  | 3.936  | 3.218  | 4.495  | 1.056  | 1.840  | 17869     | MYC      | NM_010849_15_+1 |
| Myd88    | 6.803  | 6.679  | 7.079  | 7.106  | 7.242  | 7.051  | 7.397  | 7.679  | 8.428  | 8.452  | 17874     | MYD88    | NM_010851_9_-1  |
| Myef2    | 2.747  | 3.364  | 0.989  | 2.911  | 2.455  | 2.719  | 1.721  | 1.688  | 0.619  | 1.573  | 17876     | MYEF2    | NM_010852_2_-1  |
| Myl4     | 0.070  | -0.668 | -1.985 | 0.252  | -1.315 | 0.741  | -0.312 | 2.820  | -3.373 | -2.601 | 17896     | MYL4     | NM_010858_11_+1 |
| Myl6     | 9.568  | 9.583  | 10.067 | 10.096 | 9.666  | 9.679  | 9.909  | 9.798  | 9.242  | 9.150  | 17904     | MYL6     | NM_010860_10_-1 |
| MyL2     | -2.483 | -4.981 | -3.691 | -4.061 | -1.377 | -3.230 | -1.933 | -3.421 | -2.712 | -3.233 | 17906     | MYL2     | NM_010861_5_+1  |
| Myo15    | -3.497 | -4.981 | -4.942 | -4.538 | -4.419 | -4.956 | -4.398 | -4.956 | -3.106 | -4.558 | 17910     | MYO15A   | NM_010862_11_+1 |
| Myo1b    | -4.981 | -4.981 | -3.417 | -1.766 | 3.268  | 4.602  | 0.910  | 0.008  | -1.065 | -4.062 | 17912     | MYO1B    | NM_010863_1_-1  |
| Myo5a    | 6.898  | 7.078  | 5.544  | 5.613  | 7.060  | 7.111  | 6.678  | 6.421  | 6.632  | 6.571  | 17918     | MYO5A    | NM_010864_9_+1  |
| Myom1    | 0.101  | -0.071 | 2.917  | 1.932  | 1.262  | 2.602  | 1.373  | 1.789  | 0.590  | 1.139  | 17929     | MYOM1    | NM_010867_17_+1 |
| Naip5    | 4.820  | 4.740  | 4.898  | 4.408  | 4.741  | 4.115  | 5.341  | 5.311  | 6.550  | 6.476  | 17951     | NA       | NM_010870_13_-1 |
| Naip6    | 3.403  | 3.738  | 4.554  | 3.833  | 4.020  | 3.439  | 4.308  | 3.788  | 5.686  | 4.806  | 17952     | NA       | NM_010871_13_-1 |
| Naip2    | -2.686 | -1.367 | -0.876 | 0.276  | 0.358  | -3.063 | 1.739  | 1.942  | 1.687  | 2.729  | 17948     | NAIP     | NM_010872_13_-1 |
| Nat2     | -0.209 | -0.125 | -2.035 | -3.146 | -3.707 | -3.254 | -3.008 | -4.915 | -2.168 | -4.827 | 17961     | NAT1     | NM_010874_8_+1  |
| Ncam1    | -4.981 | -4.981 | -4.962 | -4.592 | -4.936 | -4.595 | -4.972 | -4.968 | -4.981 | -2.295 | 17967     | NCAM1    | NM_010875_9_-1  |
| Ncf1     | 8.340  | 8.416  | 7.742  | 7.777  | 8.169  | 8.171  | 7.842  | 7.728  | 8.834  | 8.523  | 17969     | NCF1     | NM_010876_5_-1  |
| Ncf2     | 5.453  | 5.485  | 4.942  | 5.088  | 7.042  | 7.397  | 8.153  | 8.400  | 9.511  | 9.451  | 17970     | NCF2     | NM_010877_1_+1  |
| Nck1     | 4.965  | 5.383  | 4.746  | 4.908  | 4.756  | 5.002  | 4.910  | 5.073  | 4.965  | 5.276  | 17973     | NCK1     | NM_010878_9_-1  |
| Nck2     | 0.248  | -1.272 | 5.950  | 5.300  | 5.162  | 4.241  | 3.783  | 2.929  | 1.465  | 1.118  | 17974     | NCK2     | NM_010879_1_+1  |
| Ncl      | 7.760  | 7.728  | 8.179  | 8.304  | 8.390  | 8.399  | 8.085  | 8.149  | 7.152  | 7.037  | 17975     | NCL      | NM_010880_1_-1  |
| Ncoa1    | 5.224  | 5.053  | 5.356  | 5.298  | 5.416  | 5.277  | 5.641  | 5.676  | 6.847  | 6.885  | 17977     | NCOA1    | NM_010881_12_-1 |
| Ndn      | -3.563 | -1.343 | -4.870 | -3.760 | -4.921 | -3.420 | -4.975 | -1.552 | -4.981 | -2.261 | 17984     | NDN      | NM_010882_7_+1  |
| Ndufa2   | 7.903  | 7.750  | 7.390  | 7.391  | 7.311  | 7.369  | 7.664  | 7.430  | 6.483  | 6.339  | 17991     | NDUFA2   | NM_010885_18_-1 |
| Ndufa4   | 8.098  | 7.908  | 7.972  | 8.091  | 7.894  | 7.991  | 7.961  | 7.916  | 6.904  | 6.749  | 17992     | NDUFA4   | NM_010886_6_-1  |
| Ndufs4   | 7.270  | 7.333  | 7.453  | 7.185  | 6.661  | 6.653  | 6.792  | 6.543  | 6.038  | 5.891  | 17993     | NDUFS4   | NM_010887_13_-1 |
| Ndufs6   | 7.068  | 6.985  | 6.665  | 6.307  | 6.506  | 6.253  | 6.945  | 6.508  | 5.995  | 5.569  | 407785    | NDUFS6   | NM_010888_13_-1 |
| Neb      | 1.440  | 0.314  | -0.548 | -3.600 | -4.245 | -3.288 | -3.533 | -0.646 | -4.981 | -2.145 | 17996     | NEB      | NM_010889_2_-1  |
| Nedd4    | 5.718  | 5.880  | 7.815  | 8.114  | 7.785  | 7.868  | 6.425  | 6.312  | 2.228  | 1.341  | 17999     | NA       | NM_010890_9_+1  |
| Sept2    | 4.111  | 4.821  | 5.544  | 5.697  | 4.755  | 4.850  | 4.384  | 5.451  | 5.057  | 6.222  | 18000     | SEPT2    | NM_010891_1_+1  |
| Nek2     | -1.252 | 0.556  | 2.454  | 2.170  | 3.422  | 1.993  | 2.481  | 1.868  | 1.032  | 0.205  | 18005     | NEK2     | NM_010892_1_+1  |
| Neu1     | 4.939  | 4.952  | 5.166  | 5.465  | 5.353  | 5.543  | 5.844  | 6.089  | 7.000  | 6.831  | 18010     | NEU1     | NM_010893_17_+1 |
| Nf1      | 2.676  | 2.086  | 4.177  | 3.954  | 3.841  | 3.673  | 2.891  | 2.841  | 2.889  | 2.594  | 18015     | NF1      | NM_010897_11_+1 |
| Nf2      | 3.703  | 3.591  | 3.818  | 3.747  | 3.823  | 3.974  | 3.969  | 4.211  | 4.678  | 4.712  | 18016     | NF2      | NM_010898_11_-1 |
| Nfatc2   | 2.960  | 3.624  | 4.379  | 4.288  | 5.099  | 4.881  | 4.327  | 4.586  | 3.850  | 3.058  | 18019     | NFATC2   | NM_010899_2_-1  |
| Nfatc2ip | 1.651  | 1.849  | 2.048  | 1.980  | 3.021  | 3.042  | 2.981  | 2.085  | 1.662  | 1.701  | 18020     | NFATC2IP | NM_010900_7_-1  |
| Nfatc3   | 4.520  | 4.383  | 5.262  | 5.230  | 6.111  | 5.855  | 5.896  | 5.806  | 6.153  | 5.939  | 18021     | NFATC3   | NM_010901_8_+1  |
| Nfe2l2   | 6.199  | 6.098  | 5.840  | 6.684  | 5.812  | 5.977  | 7.420  | 7.782  | 7.724  | 6.633  | 18024     | NFE2L2   | NM_010902_2_-1  |
| Nfe2l3   | 3.409  | 2.340  | 1.919  | 0.985  | -0.163 | -1.974 | -1.103 | -1.928 | -4.981 | -4.981 | 18025     | NFE2L3   | NM_010903_6_+1  |
| Nefh     | -3.189 | -4.981 | 0.235  | -1.343 | -0.725 | -2.024 | -1.977 | -1.985 | -4.981 | -4.981 | 380684    | NEFH     | NM_010904_11_-1 |
| Nfia     | -3.864 | -2.853 | -3.215 | -1.491 | -1.737 | 0.217  | -1.915 | 1.758  | 0.482  | 1.854  | 18027     | NFIA     | NM_010905_4_+1  |
| Nfix     | -2.249 | -1.115 | 0.630  | -0.081 | 0.841  | -0.119 | 0.526  | 0.892  | 2.174  | 1.946  | 18032     | NFIX     | NM_010906_8_-1  |
| Nfkb1a   | 9.025  | 8.608  | 8.886  | 9.307  | 9.940  | 9.806  | 10.113 | 9.998  | 8.652  | 8.942  | 18035     | NFKB1A   | NM_010907_12_-1 |
| Nfkb1b   | 2.558  | 2.186  | 1.985  | 1.424  | 2.241  | 1.543  | 1.765  | 1.238  | 2.337  | 1.770  | 18036     | NFKB1B   | NM_010908_7_-1  |

|         |        |        |        |        |        |        |        |        |        |        |        |         |                 |
|---------|--------|--------|--------|--------|--------|--------|--------|--------|--------|--------|--------|---------|-----------------|
| Nfkbil1 | 4.002  | 3.641  | 3.521  | 3.550  | 3.520  | 3.251  | 3.225  | 2.990  | 3.586  | 3.208  | 18038  | NFKBIL1 | NM_010909_17_-1 |
| Nfs1    | 4.920  | 5.178  | 5.324  | 5.749  | 5.368  | 5.625  | 5.149  | 5.489  | 5.281  | 5.404  | 18041  | NFS1    | NM_010911_2_-1  |
| Nfya    | 1.978  | 2.126  | 2.924  | 2.932  | 2.408  | 2.274  | 2.225  | 1.580  | 1.500  | 1.828  | 18044  | NFYA    | NM_010913_17_-1 |
| Nfyb    | 5.145  | 5.472  | 4.895  | 4.989  | 4.991  | 5.012  | 4.839  | 4.750  | 4.480  | 4.215  | 18045  | NFYB    | NM_010914_10_-1 |
| Klk1b4  | -0.528 | -2.024 | -4.981 | -4.981 | -4.981 | -4.981 | -4.981 | -4.981 | -4.981 | -4.981 | 18048  | KLK3    | NM_010915_7_+1  |
| Nid1    | -3.349 | -2.600 | -4.748 | -0.165 | 2.584  | 3.692  | -0.819 | 0.544  | -3.242 | -4.981 | 18073  | NID1    | NM_010917_13_+1 |
| Nktr    | 5.924  | 5.795  | 6.025  | 6.031  | 5.889  | 6.072  | 5.746  | 5.752  | 5.214  | 5.656  | 18087  | NKTR    | NM_010918_9_+1  |
| Mrpl40  | 6.632  | 6.633  | 6.006  | 5.882  | 5.934  | 6.014  | 6.033  | 5.879  | 5.250  | 4.879  | 18100  | MRPL40  | NM_010922_16_-1 |
| Nnat    | -4.600 | -4.115 | -4.902 | -4.939 | -4.980 | -4.978 | -4.776 | -4.953 | -4.981 | -4.939 | 18111  | NNAT    | NM_010923_2_+1  |
| Nnmt    | -4.981 | -4.981 | -4.981 | -4.981 | -4.981 | -4.981 | -4.956 | -4.969 | -0.502 | -4.342 | 18113  | NNMT    | NM_010924_9_-1  |
| Rrp1    | 7.357  | 7.361  | 7.253  | 7.380  | 7.393  | 7.443  | 7.312  | 7.481  | 7.369  | 7.183  | 18114  | NA      | NM_010925_10_-1 |
| Emc8    | 6.608  | 6.422  | 5.585  | 5.763  | 5.994  | 5.885  | 5.767  | 5.743  | 5.139  | 5.012  | 18117  | EMC8    | NM_010926_8_-1  |
| Nos2    | -3.349 | -4.981 | -4.952 | -4.952 | -4.975 | -4.874 | -4.825 | -3.622 | -4.981 | -4.981 | 18126  | NOS2    | NM_010927_11_+1 |
| Notch2  | 4.950  | 4.846  | 6.735  | 6.775  | 6.923  | 6.752  | 6.898  | 6.839  | 8.185  | 8.017  | 18129  | NOTCH2  | NM_010928_3_+1  |
| Notch4  | 1.384  | 0.414  | 7.326  | 7.582  | 3.010  | 3.791  | 2.589  | 3.316  | -0.617 | -0.772 | 18132  | NOTCH4  | NM_010929_17_+1 |
| Uhrf1   | -4.222 | -3.612 | 3.162  | 3.611  | 4.552  | 3.567  | 3.835  | 3.197  | 1.583  | -0.296 | 18140  | UHRF1   | NM_010931_17_+1 |
| Npy1r   | -2.892 | -1.257 | -2.345 | -3.263 | -2.159 | -1.226 | -1.858 | -3.098 | -1.853 | -2.587 | 18166  | NPY1R   | NM_010934_8_+1  |
| Nras    | 5.482  | 5.728  | 5.742  | 6.003  | 5.836  | 6.046  | 5.671  | 6.310  | 5.844  | 6.724  | 18176  | NRAS    | NM_010937_3_+1  |
| Nrf1    | 3.690  | 2.847  | 3.595  | 3.816  | 3.808  | 3.483  | 3.666  | 3.721  | 4.403  | 4.164  | 18181  | NRF1    | NM_010938_6_+1  |
| Nrp2    | -4.981 | -2.722 | -2.674 | -2.177 | -2.961 | -3.542 | -0.425 | -1.498 | -0.549 | -0.840 | 18187  | NRP2    | NM_010939_1_+1  |
| Nsdhl   | 5.752  | 6.102  | 5.286  | 5.615  | 4.145  | 4.372  | 3.922  | 4.793  | 3.806  | 4.355  | 18194  | NSDHL   | NM_010941_X_+1  |
| Nsg1    | -1.842 | -4.981 | -4.989 | -4.791 | -3.857 | -4.586 | -4.794 | -3.397 | -3.563 | -3.174 | 18196  | NSG1    | NM_010942_5_-1  |
| Nsmaf   | 6.902  | 7.150  | 7.948  | 7.736  | 7.699  | 7.956  | 7.154  | 7.067  | 6.364  | 6.393  | 18201  | NSMAF   | NM_010945_4_-1  |
| Ntan1   | 7.221  | 7.163  | 6.582  | 6.627  | 6.460  | 6.539  | 6.345  | 6.233  | 5.577  | 5.561  | 18203  | NTAN1   | NM_010946_16_+1 |
| Ntn3    | -0.215 | 1.079  | -0.807 | 1.222  | -0.542 | 0.138  | -1.071 | 0.151  | -0.490 | -0.086 | 18209  | NTN3    | NM_010947_17_-1 |
| Nudc    | 7.044  | 7.003  | 7.071  | 7.554  | 6.996  | 6.873  | 6.767  | 6.798  | 6.082  | 5.798  | 18221  | NUDC    | NM_010948_4_-1  |
| Numb    | -0.683 | -3.214 | -2.018 | -3.681 | -4.270 | -4.809 | -4.270 | -0.511 | -0.097 | -4.112 | 18222  | NUMB    | NM_010949_12_-1 |
| Numbl   | 0.802  | -1.169 | -0.071 | -4.867 | -0.935 | -3.790 | 0.116  | -3.077 | 2.310  | 0.942  | 18223  | NUMBL   | NM_010950_7_+1  |
| Oaz2    | 5.599  | 5.730  | 6.060  | 6.313  | 5.134  | 5.338  | 5.920  | 6.247  | 7.230  | 7.235  | 18247  | OAZ2    | NM_010952_9_+1  |
| Ogdh    | 5.627  | 5.534  | 6.328  | 6.359  | 6.550  | 6.527  | 6.396  | 6.438  | 7.048  | 7.274  | 18293  | OGDH    | NM_010956_11_+1 |
| Ogg1    | 1.856  | 1.720  | 1.120  | 1.351  | 1.762  | 1.571  | 1.773  | 1.975  | 2.458  | 2.681  | 18294  | OGG1    | NM_010957_6_+1  |
| Oit3    | -3.349 | -4.981 | -4.929 | -2.825 | -4.019 | -3.995 | -1.339 | -4.091 | -4.981 | -4.981 | 18302  | OIT3    | NM_010959_10_-1 |
| Olfir56 | -4.981 | -1.871 | -3.528 | -4.727 | -3.961 | -4.602 | -4.924 | -3.971 | -1.249 | -1.892 | 18356  | OR2V1   | NM_010999_11_+1 |
| Omp     | -0.851 | -2.153 | -2.546 | -2.804 | -4.958 | -4.301 | -4.966 | -3.282 | -4.981 | -4.981 | 18378  | OMP     | NM_011010_7_-1  |
| Oprl1   | -4.981 | -4.981 | -4.385 | -4.966 | -4.940 | -4.980 | -4.811 | -4.987 | -4.539 | -4.981 | 18389  | OPRL1   | NM_011012_2_+1  |
| Sigmar1 | 6.223  | 7.163  | 5.926  | 6.807  | 3.976  | 4.839  | 4.701  | 6.176  | 5.827  | 6.484  | 18391  | SIGMAR1 | NM_011014_4_-1  |
| Orc1    | -1.695 | -0.656 | 0.730  | 1.248  | 0.864  | 0.666  | -0.011 | 0.810  | 0.123  | -0.947 | 18392  | ORC1    | NM_011015_4_+1  |
| Orm2    | -4.981 | -4.981 | -4.645 | -3.037 | -4.449 | -3.240 | -4.960 | -4.048 | -4.981 | -3.282 | 18406  | NA      | NM_011016_4_+1  |
| Sqstm1  | 7.852  | 7.911  | 8.604  | 8.771  | 7.991  | 7.786  | 8.049  | 7.982  | 8.050  | 7.682  | 18412  | SQSTM1  | NM_011018_11_-1 |
| Hspa4l  | 2.908  | 3.350  | 2.629  | 2.406  | 1.287  | 1.282  | 2.621  | 2.548  | 4.213  | 4.287  | 18415  | HSPA4L  | NM_011020_3_+1  |
| P2rx4   | 6.137  | 6.122  | 5.832  | 5.811  | 5.521  | 5.835  | 6.262  | 6.571  | 5.951  | 6.358  | 18438  | P2RX4   | NM_011026_5_+1  |
| P2rx7   | 3.301  | 2.988  | 3.891  | 2.961  | 2.393  | 1.197  | 3.892  | 2.560  | 5.564  | 4.871  | 18439  | P2RX7   | NM_011027_5_+1  |
| P2rx6   | -4.542 | -4.981 | -4.955 | -4.798 | -4.690 | -4.962 | -4.979 | -4.939 | -4.847 | -4.981 | 18440  | P2RX6   | NM_011028_16_+1 |
| Rpsa    | 9.624  | 9.585  | 10.331 | 10.298 | 9.972  | 9.714  | 10.099 | 10.035 | 9.298  | 9.054  | 16785  | RPSA    | NM_011029_9_+1  |
| P4ha1   | 4.901  | 5.121  | 4.781  | 4.853  | 4.035  | 4.391  | 5.007  | 5.330  | 5.433  | 5.858  | 18451  | P4HA1   | NM_011030_10_+1 |
| P4ha2   | -4.981 | -3.449 | -4.945 | -4.945 | -4.500 | -4.936 | -4.971 | -4.582 | -4.981 | -3.153 | 18452  | P4HA2   | NM_011031_11_+1 |
| P4hb    | 8.374  | 8.346  | 8.623  | 8.882  | 7.707  | 7.746  | 8.033  | 8.563  | 9.491  | 9.709  | 18453  | P4HB    | NM_011032_11_-1 |
| Prdx1   | 9.805  | 9.849  | 9.847  | 10.148 | 9.134  | 9.209  | 9.418  | 9.658  | 9.311  | 9.305  | 18477  | PRDX1   | NM_011034_4_+1  |
| Pak1    | 2.706  | 5.205  | 7.812  | 8.602  | 7.198  | 8.547  | 6.883  | 7.457  | 5.429  | 5.581  | 18479  | PAK1    | NM_011035_7_+1  |
| Pcbp2   | 0.844  | 0.085  | 1.214  | -0.112 | 1.420  | 1.242  | 1.601  | -1.126 | -0.927 | -0.434 | 18521  | PCBP2   | NM_011042_15_+1 |
| Pcna    | 7.309  | 6.776  | 7.166  | 6.799  | 7.693  | 7.273  | 7.213  | 6.903  | 6.191  | 5.833  | 18538  | PCNA    | NM_011045_2_-1  |
| Furin   | 1.556  | 0.355  | 0.067  | 2.317  | 2.105  | 2.067  | 2.633  | 3.051  | 5.322  | 5.368  | 18550  | FURIN   | NM_011046_7_-1  |
| Pcsk6   | -4.981 | -4.981 | -4.635 | -3.575 | -4.932 | -4.924 | -4.979 | -4.951 | -4.981 | -4.557 | 18553  | PCSK6   | NM_011048_7_+1  |
| Cdk16   | 3.688  | 3.391  | 3.985  | 3.760  | 4.037  | 3.946  | 3.921  | 4.352  | 5.278  | 5.308  | 18555  | CDK16   | NM_011049_X_+1  |
| Pdcd4   | -4.717 | -4.209 | -4.771 | -4.895 | -3.787 | -4.879 | -4.944 | -4.960 | -4.743 | -4.751 | 18569  | PDCD4   | NM_011050_19_+1 |
| Pdcd6   | 7.507  | 7.627  | 7.231  | 7.257  | 6.977  | 7.204  | 6.888  | 6.883  | 6.361  | 6.417  | 18570  | PDCD6   | NM_011051_13_-1 |
| Pdcd6ip | 5.699  | 6.002  | 6.845  | 6.974  | 6.593  | 6.601  | 6.396  | 6.851  | 7.470  | 7.796  | 18571  | PDCD6IP | NM_011052_9_-1  |
| Pdcd11  | 3.860  | 3.645  | 4.204  | 4.222  | 4.431  | 4.389  | 4.346  | 4.284  | 3.339  | 3.502  | 18572  | PDCD11  | NM_011053_19_+1 |
| Pde1c   | -4.558 | -4.687 | -4.972 | -4.980 | -4.979 | -4.979 | -4.962 | -4.979 | -4.981 | -4.981 | 18575  | PDE1C   | NM_011054_6_-1  |
| Pde3b   | 0.505  | 1.589  | 3.942  | 1.445  | 1.976  | 2.168  | 2.135  | 2.793  | 3.340  | 3.458  | 18576  | PDE3B   | NM_011055_7_+1  |
| Pde4d   | -2.784 | -0.232 | -1.416 | -0.942 | -1.821 | -0.281 | -0.146 | -0.030 | -0.943 | 0.216  | 238871 | NA      | NM_011056_13_+1 |
| Pdgfb   | -1.938 | -4.981 | 2.188  | 2.684  | 3.294  | 1.934  | 4.181  | 3.566  | 2.785  | 2.920  | 18591  | PDGFB   | NM_011057_15_-1 |
| Pdgfra  | -4.981 | -4.981 | -4.974 | -4.450 | -4.949 | -4.544 | -4.914 | -4.605 | -4.981 | -4.981 | 18595  | PDGFRA  | NM_011058_5_+1  |
| Padi1   | 4.175  | 2.030  | -3.380 | -2.329 | -4.398 | -4.410 | -4.670 | -3.880 | -4.981 | -2.278 | 18599  | PADI1   | NM_011059_4_-1  |
| Padi3   | -2.015 | -3.408 | -4.670 | -4.954 | -4.686 | -4.967 | -3.671 | -4.888 | -1.122 | -3.527 | 18601  | PADI3   | NM_011060_4_-1  |
| Padi4   | 0.262  | 2.243  | -3.101 | -3.336 | -3.329 | -1.712 | -0.274 | -1.526 | 6.204  | 1.469  | 18602  | PADI4   | NM_011061_4_-1  |
| Pdpk1   | 5.429  | 5.208  | 4.907  | 4.553  | 4.533  | 4.780  | 4.729  | 4.681  | 4.862  | 4.814  | 18607  | PDPK1   | NM_011062_17_-1 |
| Pea15a  | 5.452  | 5.770  | 5.780  | 6.910  | 6.171  | 7.326  | 6.416  | 7.173  | 4.734  | 6.107  | 18611  | PEA15   | NM_011063_1_-1  |
| Per1    | 3.573  | 3.965  | 2.755  | 2.945  | 4.165  | 3.450  | 3.766  | 3.299  | 3.553  | 3.064  | 18626  | PER1    | NM_011065_11_+1 |
| Per2    | -0.469 | 0.806  | -1.674 | -0.831 | 0.888  | 0.778  | -0.175 | -0.141 | 0.852  | -0.605 | 18627  | PER2    | NM_011066_1_-1  |
| Per3    | -1.372 | 0.008  | 0.299  | 0.489  | 1.175  | 0.445  | -0.247 | -0.612 | -1.597 | -1.144 | 18628  | PER3    | NM_011067_4_-1  |
| Pex11a  | 0.371  | 1.341  | 1.503  | 1.125  | 0.083  | 0.599  | 0.273  | 0.628  | 1.336  | 1.638  | 18631  | PEX11A  | NM_011068_7_-1  |
| Pex11b  | 5.239  | 4.902  | 4.037  | 4.385  | 4.236  | 4.394  | 4.208  | 4.108  | 4.613  | 4.089  | 18632  | PEX11B  | NM_011069_3_+1  |
| Pfdn2   | 5.742  | 5.788  | 5.460  | 5.350  | 5.482  | 5.514  | 5.733  | 5.544  | 4.750  | 4.436  | 18637  | PFDN2   | NM_011070_1_+1  |

|          |        |        |        |        |        |        |        |        |        |        |        |                 |                 |
|----------|--------|--------|--------|--------|--------|--------|--------|--------|--------|--------|--------|-----------------|-----------------|
| Pfn1     | 10.259 | 10.357 | 10.794 | 11.129 | 11.332 | 11.346 | 10.928 | 11.074 | 9.935  | 10.071 | 18643  | PFN1            | NM_011072_11_-1 |
| Prf1     | -3.843 | -0.985 | -3.295 | -2.365 | -2.743 | -1.300 | -0.789 | 0.469  | 0.367  | -4.227 | 18646  | PRF1            | NM_011073_10_+1 |
| Cdk14    | 1.792  | 1.736  | 7.180  | 6.155  | 6.208  | 6.165  | 5.673  | 5.038  | 4.017  | 4.295  | 18647  | CDK14           | NM_011074_5_-1  |
| Abcb1b   | 3.754  | -3.267 | 2.617  | -1.846 | 4.304  | 1.108  | 4.608  | 1.173  | 3.638  | 3.459  | 18669  | NA              | NM_011075_5_+1  |
| Abcb1a   | -1.232 | -4.981 | 1.442  | 1.009  | 5.891  | 5.836  | 4.249  | 2.637  | 1.320  | 2.075  | 18671  | ABCB1           | NM_011076_5_+1  |
| Phex     | -4.981 | -3.408 | -2.687 | -4.463 | -4.855 | -3.800 | -4.789 | -2.939 | -4.981 | -3.853 | 18675  | PHEX            | NM_011077_X_-1  |
| Phf2     | 4.309  | 4.336  | 3.509  | 3.575  | 4.008  | 3.606  | 3.628  | 3.617  | 4.055  | 4.142  | 18676  | PHF2            | NM_011078_13_-1 |
| Phkg1    | -4.981 | -4.981 | -3.034 | -1.174 | -3.932 | -4.784 | -3.727 | -2.784 | -1.798 | -4.981 | 18682  | PHKG1           | NM_011079_5_-1  |
| Piga     | 2.458  | 1.997  | 2.653  | 2.806  | 2.333  | 2.499  | 2.091  | 2.578  | 1.903  | 2.544  | 18700  | PIGA            | NM_011081_X_+1  |
| Pigr     | -3.668 | -1.894 | -4.649 | 0.254  | -1.784 | 2.260  | -2.111 | 0.778  | -4.190 | -2.652 | 18703  | PIGR            | NM_011082_1_+1  |
| Pik3c2a  | 3.152  | 3.412  | 4.542  | 4.298  | 3.981  | 3.940  | 4.368  | 4.292  | 4.971  | 5.423  | 18704  | PIK3C2A         | NM_011083_7_-1  |
| Pikfyve  | 3.833  | 3.851  | 4.480  | 4.113  | 4.252  | 4.051  | 4.493  | 4.359  | 4.930  | 4.947  | 18711  | PIKFYVE         | NM_011086_1_+1  |
| Pira1    | 1.676  | 6.475  | -4.568 | 4.738  | -4.463 | 7.631  | 1.201  | 7.236  | -4.504 | 9.487  | 18722  | LILRB3          | NM_011087_7_-1  |
| Pira11   | 3.145  | 2.877  | 2.646  | 4.303  | 2.804  | 4.391  | 3.680  | 5.021  | 6.732  | 6.468  | 18724  | NA              | NM_011088_7_-1  |
| Pira2    | 4.181  | 4.373  | 4.028  | 3.773  | 6.929  | 6.035  | 6.155  | 6.223  | 8.045  | 8.026  | 18725  | LILRB3          | NM_011089_7_-1  |
| Lilra6   | 1.499  | 4.021  | 0.173  | 2.610  | 3.981  | 5.002  | 2.587  | 5.172  | 6.732  | 7.590  | 18726  | LILRB3          | NM_011090_7_-1  |
| Pira4    | -3.888 | 0.965  | 0.944  | -2.626 | -0.024 | -2.800 | 0.051  | -1.716 | -0.706 | -2.469 | 18727  | NA              | NM_011091_7_-1  |
| Pira6    | -1.014 | -2.886 | -1.002 | -1.461 | 1.880  | -0.804 | 3.724  | 3.149  | 4.479  | 3.963  | 18729  | NA              | NM_011093_7_+1  |
| Pira7    | -1.297 | 0.913  | -0.263 | -0.388 | 2.370  | 2.499  | 1.794  | 1.803  | 4.709  | 5.062  | 18730  | NA              | NM_011094_7_-1  |
| Pirb     | 7.799  | 7.638  | 8.228  | 7.084  | 8.969  | 8.843  | 9.033  | 8.858  | 10.433 | 10.250 | 18733  | LILRB3          | NM_011095_7_-1  |
| Pkm      | 7.400  | 7.487  | 8.636  | 8.994  | 8.601  | 8.488  | 8.765  | 8.894  | 10.629 | 10.261 | 18746  | PKM             | NM_011099_9_+1  |
| Prkacb   | 2.882  | 2.606  | 4.043  | 3.605  | 3.792  | 2.938  | 3.953  | 4.159  | 4.176  | 4.439  | 18749  | PRKACB          | NM_011100_3_-1  |
| Prkca    | 5.908  | 4.847  | -1.493 | -1.184 | -0.691 | -0.890 | -0.078 | -0.222 | -0.896 | -1.446 | 18750  | PRKCA           | NM_011101_11_-1 |
| Prkcg    | 1.326  | 1.889  | -2.285 | -2.560 | -2.892 | -3.557 | -3.226 | -4.864 | -1.908 | -1.807 | 18752  | PRKCG           | NM_011102_7_+1  |
| Prkcd    | 8.375  | 8.678  | 7.404  | 7.395  | 7.837  | 7.432  | 8.826  | 8.729  | 9.980  | 9.787  | 18753  | PRKCD           | NM_011103_14_-1 |
| Prkce    | 1.851  | 2.049  | 0.914  | 0.850  | 1.944  | 2.547  | 2.449  | 2.256  | 2.726  | 2.956  | 18754  | PRKCE           | NM_011104_17_+1 |
| Pkig     | 0.084  | 2.340  | -3.951 | -4.532 | -2.066 | -2.270 | -4.064 | -2.350 | -3.668 | -1.158 | 18769  | PKIG            | NM_011106_2_+1  |
| Pla2g1b  | -2.842 | -3.267 | -4.938 | -4.938 | -4.981 | -4.981 | -4.965 | -4.582 | -4.981 | -4.981 | 18778  | PLA2G1B         | NM_011107_5_+1  |
| Pla2g2d  | 1.717  | 0.442  | 0.683  | 1.820  | -0.015 | 0.250  | 0.792  | 2.204  | 0.038  | -0.610 | 18782  | PLA2G2D         | NM_011109_4_+1  |
| Pla2g5   | -4.981 | -4.981 | -4.149 | -4.974 | -4.981 | -4.711 | -4.479 | -4.907 | -4.981 | -4.981 | 18784  | PLA2G5          | NM_011110_4_-1  |
| Serpinb2 | -4.336 | -4.981 | 5.104  | 4.933  | 3.735  | 4.154  | 1.422  | 0.422  | -0.197 | -2.507 | 18788  | SERPINB2        | NM_011111_1_+1  |
| Papola   | 7.161  | 7.461  | 7.637  | 7.698  | 7.774  | 7.796  | 7.467  | 7.611  | 7.628  | 8.011  | 18789  | PAPOLA          | NM_011112_12_+1 |
| Plaur    | 9.100  | 8.584  | 0.425  | 3.078  | 4.326  | 6.846  | 6.519  | 7.327  | 8.398  | 8.421  | 18793  | PLAUR           | NM_011113_7_+1  |
| Pld3     | 5.256  | 4.155  | 3.711  | 4.008  | 4.891  | 4.687  | 5.212  | 6.090  | 5.036  | 5.033  | 18807  | PLD3            | NM_011116_7_-1  |
| Plec     | 2.896  | 2.474  | 2.024  | 1.281  | 3.317  | 2.895  | 3.386  | 3.151  | 4.660  | 4.436  | 18810  | PLEC            | NM_011117_15_-1 |
| Pa2g4    | 4.995  | 4.745  | 5.559  | 5.668  | 5.366  | 5.406  | 4.970  | 5.043  | 3.743  | 3.752  | 18813  | PA2G4           | NM_011119_10_-1 |
| Plk1     | 0.288  | 0.283  | 2.631  | 3.263  | 3.596  | 3.167  | 2.989  | 3.090  | 1.945  | 1.441  | 18817  | PLK1            | NM_011121_7_+1  |
| Plod1    | 1.891  | 2.675  | 2.305  | 2.675  | 2.631  | 2.618  | 3.437  | 3.932  | 5.189  | 5.369  | 18822  | PLOD1           | NM_011122_4_-1  |
| Plp1     | -4.043 | -3.324 | -4.381 | -4.617 | -4.600 | -4.325 | -4.125 | -3.635 | -4.537 | -4.845 | 18823  | PLP1            | NM_011123_X_+1  |
| Ccl21a   | -0.081 | -4.981 | -3.265 | -2.868 | -3.307 | -4.983 | -1.786 | -3.898 | -3.504 | -4.981 | 18829  | CCL21           | NM_011124_4_-1  |
| Pltp     | 10.100 | 10.189 | 0.389  | 1.492  | 5.678  | 7.300  | 7.221  | 8.281  | 5.713  | 6.690  | 18830  | PLTP            | NM_011125_2_-1  |
| Sept4    | 1.447  | 0.530  | -1.598 | -2.872 | -2.254 | -1.899 | -4.981 | -4.981 | -4.888 | -4.981 | 18952  | SEPT4           | NM_011129_11_+1 |
| Polb     | 6.002  | 6.126  | 5.919  | 5.978  | 6.232  | 6.300  | 6.179  | 5.847  | 6.113  | 6.253  | 18970  | POLB            | NM_011130_8_-1  |
| Pold1    | 5.051  | 5.109  | 3.896  | 3.737  | 5.024  | 4.619  | 4.765  | 4.088  | 3.517  | 2.632  | 18971  | POLD1           | NM_011131_7_-1  |
| Pole     | -1.210 | 0.263  | 2.432  | 2.364  | 3.472  | 2.938  | 2.718  | 1.927  | 1.147  | 0.226  | 18973  | POLE            | NM_011132_5_+1  |
| Pole2    | 1.422  | 1.499  | 3.349  | 3.277  | 3.427  | 2.840  | 3.252  | 3.004  | 1.862  | 1.790  | 18974  | POLE2           | NM_011133_12_-1 |
| Cnot7    | 6.130  | 6.481  | 5.895  | 6.047  | 5.781  | 5.822  | 5.490  | 5.683  | 5.154  | 5.497  | 18983  | CNOT7           | NM_011135_8_-1  |
| Pou2af1  | 1.325  | 0.851  | -0.749 | 2.106  | 0.595  | 2.749  | 2.183  | 5.263  | -0.947 | 0.323  | 18985  | POU2AF1         | NM_011136_9_+1  |
| Pou2f1   | 1.439  | 2.354  | 1.588  | 0.981  | 2.949  | 1.698  | 1.687  | 1.450  | 1.338  | 1.458  | 18986  | POU2F1          | NM_011137_1_-1  |
| Pou2f2   | 0.193  | -0.175 | -0.155 | 0.151  | 0.606  | 1.072  | 1.587  | 2.233  | 4.030  | 3.312  | 18987  | POU2F2          | NM_011138_7_-1  |
| Pou3f1   | -4.981 | -4.981 | -3.200 | -3.928 | -3.642 | -3.908 | -4.359 | -4.056 | -2.288 | -4.981 | 18991  | NA              | NM_011141_4_+1  |
| Ppard    | 0.777  | 1.536  | -0.442 | -0.530 | 0.195  | 0.367  | 0.473  | 0.563  | 0.770  | 1.268  | 19015  | PPARD           | NM_011145_17_+1 |
| Pparg    | -0.013 | -0.656 | -1.531 | -2.408 | -4.909 | -3.855 | -2.247 | -1.628 | -3.943 | -3.769 | 19016  | PPARG           | NM_011146_6_+1  |
| Ppef1    | -3.349 | -4.981 | 0.871  | 0.759  | -4.760 | -4.392 | -4.811 | -4.102 | -1.893 | -3.480 | 237178 | PPEF1           | NM_011147_X_-1  |
| Ppef2    | -4.981 | -4.981 | 2.375  | 1.871  | -4.558 | -2.966 | -3.871 | -2.167 | -0.056 | 0.015  | 19023  | PPEF2           | NM_011148_5_-1  |
| Ppib     | 8.603  | 8.571  | 8.839  | 8.875  | 8.083  | 8.234  | 8.144  | 8.492  | 7.856  | 7.776  | 19035  | PPIB            | NM_011149_9_+1  |
| Lgals3bp | 7.323  | 7.001  | 6.342  | 5.791  | 6.176  | 5.161  | 7.116  | 6.957  | 7.880  | 6.354  | 19039  | LGALS3BP        | NM_011150_11_-1 |
| Ppm1b    | 4.479  | 4.946  | 5.052  | 5.053  | 4.946  | 4.893  | 4.967  | 4.825  | 5.029  | 5.091  | 19043  | PPM1B           | NM_011151_17_+1 |
| Ppp2r3d  | -0.336 | -0.053 | -0.862 | -1.040 | -1.169 | -1.740 | -0.832 | -0.953 | -0.669 | -0.394 | 19054  | NA              | NM_011154_9_-1  |
| Ppp5c    | 5.440  | 5.307  | 5.637  | 5.795  | 5.345  | 5.462  | 4.969  | 5.189  | 4.857  | 4.948  | 19060  | PPP5C           | NM_011155_7_-1  |
| Prep     | 4.654  | 4.626  | 5.218  | 5.410  | 4.924  | 5.094  | 5.197  | 5.437  | 6.039  | 6.206  | 19072  | PREP            | NM_011156_10_+1 |
| Srgn     | 10.657 | 10.321 | 10.642 | 10.403 | 10.117 | 10.271 | 10.135 | 10.067 | 9.081  | 9.279  | 19073  | NA              | NM_011157_10_-1 |
| Prkar2b  | 5.258  | 5.303  | 5.670  | 5.655  | 5.164  | 4.826  | 4.623  | 4.740  | 5.435  | 5.692  | 19088  | PRKAR2B         | NM_011158_12_-1 |
| Prkdc    | 4.323  | 4.095  | 4.236  | 4.287  | 5.097  | 5.184  | 4.286  | 4.268  | 3.875  | 4.231  | 19090  | PRKDC           | NM_011159_16_+1 |
| Prkg1    | -3.189 | -4.981 | -4.996 | -4.451 | -4.167 | -4.387 | -4.480 | -4.201 | -4.981 | -4.981 | 19091  | PRKG1           | NM_011160_19_-1 |
| Mapk11   | 0.991  | 0.950  | 2.270  | 1.918  | 5.200  | 5.098  | 2.919  | 2.504  | -1.390 | 0.293  | 19094  | MAPK11          | NM_011161_15_-1 |
| Mapk8ip1 | -4.981 | -2.997 | -2.806 | -2.620 | -0.875 | -1.617 | -2.081 | -3.861 | -4.394 | -4.981 | 19099  | MAPK8IP1        | NM_011162_2_-1  |
| Eif2ak2  | 4.292  | 3.835  | 4.995  | 4.068  | 4.370  | 3.180  | 4.816  | 4.258  | 4.896  | 4.498  | 19106  | EIF2AK2         | NM_011163_17_-1 |
| Prlr     | -0.798 | -4.981 | -3.659 | -3.650 | -4.866 | -4.085 | -3.286 | -1.600 | -4.013 | -4.227 | 19116  | PRLR            | NM_011169_15_+1 |
| Prnp     | -3.382 | -2.257 | 2.084  | 5.100  | 4.691  | 4.771  | 0.327  | 0.393  | -2.961 | 2.517  | 19122  | PRNP            | NM_011170_2_+1  |
| Procr    | 4.394  | 3.037  | 5.888  | 6.752  | 4.912  | 5.519  | 4.270  | 4.117  | -3.531 | -1.182 | 19124  | PROCR           | NM_011171_2_+1  |
| Prodh    | 4.376  | 4.238  | 0.535  | 1.161  | -1.894 | -0.838 | 1.028  | 1.378  | 1.285  | 0.798  | 19125  | LOC102724788 PR | NM_011172_16_-1 |
| Pros1    | 1.985  | 2.106  | 2.195  | 1.612  | 0.771  | 2.339  | 3.553  | 5.064  | 6.484  | 7.592  | 19128  | PROS1           | NM_011173_16_+1 |
| Lgmn     | 5.676  | 5.199  | 5.586  | 5.602  | 5.980  | 5.784  | 6.792  | 7.086  | 7.149  | 7.462  | 19141  | LGMN            | NM_011175_12_-1 |

|         |        |        |        |        |        |        |        |        |        |        |        |                |                 |
|---------|--------|--------|--------|--------|--------|--------|--------|--------|--------|--------|--------|----------------|-----------------|
| St14    | 2.653  | 2.601  | 2.369  | 2.758  | 5.824  | 5.936  | 4.152  | 3.328  | 0.562  | 0.624  | 19143  | ST14           | NM_011176_9_-1  |
| Prt3    | -0.629 | -2.344 | -4.878 | -2.442 | -3.859 | 3.395  | -1.636 | 3.705  | 4.945  | 3.956  | 19152  | PRTN3          | NM_011178_10_+1 |
| Psap    | 5.463  | 6.428  | 6.495  | 6.451  | 3.662  | 3.251  | 5.885  | 5.827  | 5.367  | 5.323  | 19156  | PSAP           | NM_011179_10_+1 |
| Cyth1   | 4.946  | 4.527  | 2.994  | 3.239  | 4.021  | 4.572  | 4.520  | 4.589  | 4.777  | 5.018  | 19157  | CYTH1          | NM_011180_11_-1 |
| Cyth2   | 4.632  | 5.126  | 4.292  | 4.145  | 4.188  | 4.258  | 4.091  | 4.317  | 4.479  | 4.550  | 19158  | CYTH2          | NM_011181_7_-1  |
| Cyth3   | 2.480  | 2.813  | 3.896  | 4.006  | 2.636  | 3.296  | 4.755  | 4.996  | 5.653  | 5.560  | 19159  | CYTH3          | NM_011182_5_+1  |
| Psen2   | -0.668 | -0.290 | -1.894 | -0.160 | -1.308 | -2.538 | -1.038 | -1.279 | -1.869 | -1.090 | 19165  | PSEN2          | NM_011183_1_-1  |
| Psma3   | 9.108  | 9.155  | 9.426  | 9.394  | 8.926  | 8.855  | 8.698  | 8.602  | 7.598  | 7.716  | 19167  | PSMA3          | NM_011184_12_+1 |
| Psemb1  | 9.369  | 9.402  | 8.867  | 9.020  | 8.453  | 8.488  | 8.453  | 8.518  | 7.734  | 7.795  | 19170  | PSMB1          | NM_011185_17_-1 |
| Psemb5  | 8.092  | 7.267  | 7.828  | 7.296  | 7.507  | 6.924  | 7.484  | 6.901  | 7.189  | 6.210  | 19173  | PSMB5          | NM_011186_14_-1 |
| Psemb7  | 6.748  | 6.702  | 7.178  | 7.198  | 6.509  | 6.500  | 6.372  | 6.341  | 6.077  | 5.867  | 19177  | PSMB7          | NM_011187_2_-1  |
| Psmc2   | 7.397  | 7.732  | 7.002  | 7.401  | 7.051  | 7.248  | 6.910  | 7.135  | 6.571  | 6.681  | 19181  | PSMC2          | NM_011188_5_+1  |
| Psmc1   | 9.926  | 9.638  | 10.291 | 10.042 | 9.380  | 9.226  | 9.153  | 8.911  | 8.110  | 7.682  | 19186  | PSME1          | NM_011189_14_+1 |
| Psmc2   | 9.243  | 9.246  | 9.390  | 9.845  | 8.829  | 9.151  | 8.724  | 9.014  | 7.610  | 7.432  | 19188  | PSME2          | NM_011190_14_-1 |
| Psmc3   | 6.357  | 6.493  | 7.110  | 7.241  | 6.947  | 7.020  | 6.899  | 6.969  | 6.901  | 6.832  | 19192  | PSME3          | NM_011192_11_+1 |
| Pstpip1 | 5.786  | 5.816  | 5.977  | 5.529  | 5.596  | 5.254  | 5.815  | 5.486  | 6.802  | 6.307  | 19200  | PSTPIP1        | NM_011193_9_+1  |
| Ptcra   | 4.100  | 5.524  | -1.543 | -0.475 | -2.760 | -2.255 | -1.746 | -4.887 | -1.866 | -2.858 | 19208  | PTCRA          | NM_011195_17_-1 |
| Ptger3  | -0.859 | -0.908 | -1.064 | -1.090 | 5.334  | 5.511  | 4.973  | 4.093  | -4.394 | -3.527 | 19218  | PTGER3         | NM_011196_3_+1  |
| Ptgfrn  | -4.981 | -4.981 | -4.959 | -3.188 | -2.577 | -0.510 | 0.372  | 1.125  | 0.379  | 1.207  | 19221  | PTGFRN         | NM_011197_3_-1  |
| Ptgs2   | 0.816  | -3.315 | 3.408  | 2.949  | 7.911  | 7.193  | 7.474  | 6.373  | 5.196  | 5.705  | 19225  | PTGS2          | NM_011198_1_+1  |
| Pth1r   | -2.832 | -3.585 | -2.351 | -3.235 | -3.363 | -3.958 | -3.465 | -4.112 | -3.738 | -3.269 | 19228  | PTH1R          | NM_011199_9_-1  |
| Ptp4a1  | 4.745  | 4.270  | 4.013  | 4.409  | 4.256  | 4.230  | 5.166  | 4.961  | 5.524  | 5.854  | 19243  | PTP4A1         | NM_011200_1_-1  |
| Ptpn1   | 8.320  | 8.220  | 6.804  | 6.836  | 7.456  | 7.504  | 7.829  | 8.250  | 9.499  | 9.459  | 19246  | PTPN1          | NM_011201_2_+1  |
| Ptpn11  | 3.378  | 3.678  | 4.873  | 4.003  | 4.150  | 4.219  | 3.933  | 3.826  | 4.202  | 3.424  | 19247  | PTPN11         | NM_011202_5_-1  |
| Ptpn12  | 1.752  | 2.395  | 2.764  | 3.858  | 4.238  | 4.684  | 4.544  | 4.425  | 5.047  | 5.140  | 19248  | PTPN12         | NM_011203_5_-1  |
| Ptpn13  | -4.981 | -4.981 | -4.944 | -2.104 | -3.724 | -2.812 | -3.872 | -1.282 | -4.981 | -4.981 | 19249  | PTPN13         | NM_011204_5_+1  |
| Ptpn18  | 7.926  | 7.126  | 7.923  | 7.789  | 7.466  | 7.083  | 7.526  | 7.027  | 7.141  | 6.724  | 19253  | PTPN18         | NM_011206_1_+1  |
| Ptpn3   | 2.130  | 1.693  | 1.045  | 0.784  | 3.840  | 3.956  | 1.350  | -0.430 | -4.981 | -3.527 | 545622 | PTPN3          | NM_011207_4_-1  |
| Ptprc   | 7.163  | 7.048  | 9.584  | 9.494  | 10.763 | 10.973 | 10.583 | 10.609 | 10.259 | 10.955 | 19264  | PTPRC          | NM_011210_1_-1  |
| Ptpre   | 5.938  | 6.053  | 6.532  | 6.279  | 7.265  | 7.232  | 7.464  | 7.144  | 7.748  | 7.484  | 19267  | PTPRE          | NM_011212_7_+1  |
| Ptprf   | 5.911  | 5.757  | 1.988  | 0.286  | -1.075 | -1.880 | -4.948 | -3.825 | -4.981 | -3.855 | 19268  | PTPRF          | NM_011213_4_-1  |
| Ptpru   | -4.981 | -4.981 | -4.981 | -4.981 | -4.455 | -4.309 | -4.980 | -4.958 | -0.207 | -0.594 | 19273  | PTPRU          | NM_011214_4_-1  |
| Ptpro   | -4.068 | -4.981 | -4.747 | -4.892 | -3.707 | -2.245 | -2.707 | -2.491 | -1.425 | -0.972 | 19277  | PTPRO          | NM_011216_6_+1  |
| Ptprr   | -4.981 | -4.981 | -4.981 | -4.981 | -4.981 | -4.981 | -4.981 | -4.981 | -4.981 | -4.981 | 19279  | PTPRR          | NM_011217_10_+1 |
| Ptprs   | 4.007  | 4.203  | 4.344  | 3.899  | 2.182  | 2.964  | 2.505  | 1.847  | 3.937  | 4.203  | 19280  | PTPRS          | NM_011218_17_-1 |
| Pts     | 7.265  | 7.225  | 6.540  | 6.206  | 6.729  | 6.435  | 6.617  | 6.204  | 5.724  | 5.674  | 19286  | PTS            | NM_011220_9_-1  |
| Purb    | 5.903  | 5.888  | 6.327  | 6.030  | 6.807  | 6.697  | 6.611  | 6.309  | 6.105  | 6.133  | 19291  | PURB           | NM_011221_11_-1 |
| Pxn     | 4.423  | 4.310  | 5.636  | 5.603  | 6.075  | 5.811  | 6.024  | 5.585  | 6.962  | 6.634  | 19303  | PXN            | NM_011223_5_+1  |
| Pygm    | -0.410 | 0.671  | -1.607 | -0.987 | -0.822 | -1.923 | -0.082 | -0.985 | -0.091 | -1.088 | 19309  | PYGM           | NM_011224_19_+1 |
| Rab19   | 2.841  | 1.950  | 5.223  | 5.240  | 3.960  | 4.481  | 4.401  | 4.444  | 4.558  | 4.095  | 19331  | RAB19          | NM_011226_6_+1  |
| Rab20   | 0.618  | 0.879  | 1.770  | 2.711  | 2.335  | 2.608  | 3.026  | 3.725  | 2.666  | 2.978  | 19332  | RAB20          | NM_011227_8_-1  |
| Rab33a  | -3.668 | -3.408 | -4.289 | -2.500 | -1.195 | -1.116 | -1.977 | -1.943 | -1.141 | -0.374 | 19337  | RAB33A         | NM_011228_X_+1  |
| Rabggtb | -4.489 | -2.370 | -2.725 | -1.662 | -4.695 | -4.949 | -4.253 | -4.328 | -4.448 | -4.740 | 19352  | RABGGTB        | NM_011231_3_-1  |
| Rad1    | 3.110  | 3.188  | 2.704  | 2.621  | 2.872  | 2.592  | 2.894  | 2.886  | 2.207  | 2.003  | 19355  | RAD1           | NM_011232_15_+1 |
| Rad17   | 1.724  | 1.863  | 1.518  | 1.692  | 1.854  | 1.412  | 2.097  | 1.571  | 1.912  | 1.602  | 19356  | RAD17          | NM_011233_13_-1 |
| Rad51   | 0.471  | 0.504  | 3.684  | 3.216  | 4.419  | 3.327  | 3.416  | 2.836  | 1.312  | -0.087 | 19361  | RAD51          | NM_011234_2_+1  |
| Rad51d  | 4.833  | 4.788  | 4.889  | 4.850  | 5.140  | 5.100  | 4.576  | 4.356  | 3.505  | 3.457  | 19364  | RAD51D         | NM_011235_11_-1 |
| Rad52   | 1.627  | 1.725  | -2.157 | -0.186 | -1.294 | -0.587 | -0.036 | -1.301 | -0.826 | -0.009 | 19365  | RAD52          | NM_011236_6_+1  |
| Rad9a   | 5.004  | 5.112  | 5.087  | 4.973  | 5.204  | 5.322  | 5.344  | 5.605  | 5.849  | 5.775  | 19367  | RAD9A          | NM_011237_19_-1 |
| Ranbp1  | 7.383  | 7.220  | 7.666  | 7.806  | 7.669  | 7.558  | 7.455  | 7.299  | 5.701  | 5.485  | 19385  | RANBP1         | NM_011239_16_-1 |
| Ranbp2  | 4.877  | 4.974  | 6.539  | 6.189  | 6.053  | 6.044  | 5.968  | 5.856  | 5.554  | 5.855  | 19386  | RGPD1 RGPD2 RG | NM_011240_10_+1 |
| Rangap1 | 1.419  | -0.449 | 2.089  | -0.025 | 1.171  | 1.104  | 1.257  | 0.000  | 1.241  | 0.300  | 19387  | RANGAP1        | NM_011241_15_-1 |
| Rasgrp2 | 6.426  | 6.524  | 2.484  | 2.522  | 3.351  | 3.268  | 5.024  | 5.382  | 6.397  | 6.327  | 19395  | RASGRP2        | NM_011242_19_+1 |
| Rarb    | -4.762 | -4.669 | -2.548 | -2.057 | 0.176  | 0.016  | 1.113  | 0.674  | -1.047 | -2.179 | 218772 | RARB           | NM_011243_14_-1 |
| Rarg    | -4.799 | -4.689 | -4.629 | -4.596 | -3.409 | -2.586 | -3.839 | -3.030 | -2.808 | -4.968 | 19411  | RARG           | NM_011244_15_-1 |
| Rasgrf1 | 3.187  | 3.612  | -1.902 | -2.089 | -2.007 | -2.654 | -0.897 | -2.882 | -2.468 | -2.749 | 19417  | RASGRF1        | NM_011245_9_+1  |
| Rasgrp1 | 0.634  | -2.160 | 0.911  | 1.524  | 4.270  | 3.627  | 5.804  | 5.788  | 3.676  | 3.254  | 19419  | RASGRP1        | NM_011246_2_-1  |
| Rbbp6   | 6.318  | 6.022  | 5.891  | 5.718  | 5.844  | 5.819  | 5.551  | 5.261  | 5.098  | 5.010  | 19647  | RBBP6          | NM_011247_7_+1  |
| Rbl1    | 3.452  | 3.503  | 3.968  | 4.177  | 4.814  | 4.467  | 4.402  | 3.897  | 4.241  | 4.400  | 19650  | RBL1           | NM_011249_2_-1  |
| Rbl2    | 4.498  | 4.725  | 4.583  | 4.460  | 5.275  | 5.858  | 5.202  | 5.398  | 6.138  | 6.258  | 19651  | RBL2           | NM_011250_8_+1  |
| Rbm6    | 5.147  | 5.129  | 5.404  | 5.231  | 5.657  | 5.589  | 5.512  | 5.357  | 5.609  | 5.532  | 19654  | RBM6           | NM_011251_9_-1  |
| RbmX    | 5.137  | 5.201  | 4.898  | 4.639  | 4.764  | 4.652  | 4.272  | 3.828  | 3.677  | 3.295  | 19655  | RBMX           | NM_011252_X_-1  |
| Rbp1    | -3.090 | -1.402 | -2.667 | -2.626 | -3.492 | -0.026 | -3.343 | -4.627 | -3.242 | -3.816 | 19659  | RBP1           | NM_011254_9_+1  |
| Rbp4    | -4.981 | 1.787  | -1.558 | 0.103  | -4.979 | -4.787 | -3.951 | -4.789 | -4.981 | -4.981 | 19662  | RBP4           | NM_011255_19_-1 |
| Pitpnm2 | -0.488 | -1.761 | -2.752 | -2.527 | -1.750 | -2.876 | -2.023 | -2.187 | -4.981 | -2.750 | 19679  | PITPNM2        | NM_011256_5_-1  |
| Rfc1    | 6.092  | 5.963  | 5.725  | 5.738  | 5.580  | 5.640  | 5.805  | 5.577  | 5.468  | 5.249  | 19687  | RFC1           | NM_011258_5_-1  |
| Reln    | -3.308 | -3.182 | -4.113 | -1.712 | -4.576 | -3.021 | -3.637 | -4.775 | -4.981 | -3.870 | 19699  | RELN           | NM_011261_5_-1  |
| Dpf2    | 5.574  | 5.639  | 6.200  | 6.213  | 6.295  | 6.090  | 6.156  | 6.012  | 6.476  | 6.322  | 19708  | DPF2           | NM_011262_19_-1 |
| Rest    | 5.147  | 5.016  | 5.356  | 5.392  | 6.374  | 6.267  | 5.720  | 5.555  | 5.327  | 5.599  | 19712  | REST           | NM_011263_5_+1  |
| Rev3l   | 3.307  | 3.038  | 4.805  | 4.515  | 4.762  | 4.892  | 4.043  | 3.741  | 3.852  | 3.861  | 19714  | REV3L          | NM_011264_10_+1 |
| Rfx3    | 2.239  | 2.034  | 2.026  | 1.983  | 2.341  | 1.419  | 1.967  | 0.855  | 2.400  | 2.330  | 19726  | RFX3           | NM_011265_19_-1 |
| Rfxank  | 3.620  | 3.743  | 2.683  | 2.999  | 2.759  | 3.003  | 2.602  | 3.222  | 2.529  | 2.624  | 19727  | RFXANK         | NM_011266_8_-1  |
| Rgs16   | -1.902 | 0.050  | -4.976 | -1.987 | -2.700 | 3.785  | -4.350 | -0.365 | -4.981 | -4.981 | 19734  | RGS16          | NM_011267_1_+1  |
| Rgs9    | -2.483 | -4.981 | -4.897 | -4.897 | -4.204 | -4.948 | -4.961 | -4.960 | -4.981 | -4.981 | 19739  | RGS9           | NM_011268_11_-1 |

|          |        |        |        |        |        |        |        |        |        |        |           |                   |                     |
|----------|--------|--------|--------|--------|--------|--------|--------|--------|--------|--------|-----------|-------------------|---------------------|
| Rhag     | -4.981 | 1.357  | -1.269 | 2.989  | -1.860 | 3.268  | 0.156  | 3.429  | -3.925 | 1.477  | 19743     | RHAG              | NM_011269_17_+1     |
| Rhd      | 2.480  | 3.415  | -0.069 | 4.219  | 1.383  | 4.714  | 0.918  | 4.707  | -0.736 | 1.627  | 19746     | RHCE RHD          | NM_011270_4_+1      |
| Rnase1   | -4.981 | -1.308 | -3.954 | -3.306 | -5.017 | -4.231 | -3.826 | -4.954 | -4.981 | -4.981 | 19752     | RNASE1            | NM_011271_14_-1     |
| Xpr1     | 3.726  | 4.410  | 5.074  | 4.600  | 4.545  | 4.725  | 5.116  | 5.169  | 5.880  | 6.384  | 19775     | XPR1              | NM_011273_1_-1      |
| Uri1     | 5.390  | 5.431  | 5.273  | 5.450  | 5.167  | 5.681  | 5.080  | 5.293  | 5.227  | 5.460  | 19777     | URI1              | NM_011274_7_-1      |
| Rnaseh1  | 3.771  | 3.936  | 3.896  | 3.490  | 3.385  | 3.499  | 3.511  | 3.080  | 3.418  | 2.831  | 19819     | RNASEH1           | NM_011275_12_+1     |
| Rlim     | 4.755  | 4.748  | 5.649  | 5.646  | 5.728  | 5.662  | 5.717  | 5.469  | 5.761  | 6.050  | 19820     | RLIM              | NM_011276_X_-1      |
| Rnf2     | 5.282  | 5.634  | 4.577  | 4.744  | 5.099  | 5.167  | 5.434  | 5.416  | 5.394  | 5.818  | 19821     | RNF2              | NM_011277_1_-1      |
| Rnf4     | 5.054  | 4.539  | 5.823  | 5.774  | 4.854  | 5.071  | 5.195  | 5.400  | 5.866  | 5.857  | 19822     | RNF4              | NM_011278_5_+1      |
| Rnf7     | 7.177  | 7.073  | 6.516  | 6.305  | 5.993  | 5.929  | 6.169  | 6.127  | 5.608  | 5.651  | 19823     | RNF7              | NM_011279_9_-1      |
| Trim10   | -2.647 | 1.528  | -1.142 | 2.613  | -1.322 | 3.024  | 0.185  | 2.827  | -1.618 | 1.269  | 19824     | TRIM10            | NM_011280_17_+1     |
| Rorc     | -1.781 | -1.509 | -4.956 | -2.723 | -2.271 | -4.919 | -2.799 | -4.827 | -4.981 | -4.981 | 19885     | RORC              | NM_011281_3_+1      |
| Rpa2     | 4.972  | 5.149  | 4.566  | 4.888  | 5.196  | 5.027  | 4.865  | 4.776  | 4.086  | 3.708  | 19891     | RPA2              | NM_011284_4_+1      |
| Rpgr     | 2.291  | 2.361  | 1.677  | 1.654  | 1.308  | 1.757  | 1.139  | 0.604  | 1.039  | 1.530  | 19893     | RPGR              | NM_011285_X_-1      |
| Rpl10a   | 8.386  | 8.656  | 8.636  | 8.843  | 8.133  | 8.460  | 8.446  | 8.799  | 7.291  | 7.659  | 19896     | RPL10A            | NM_011287_17_+1     |
| Mrpl23   | 6.962  | 6.683  | 5.997  | 5.851  | 6.009  | 5.999  | 6.632  | 6.477  | 5.433  | 5.160  | 19935     | LOC102724828 MFNM | NM_011288_7_+1      |
| Rpl27    | 8.605  | 8.576  | 9.103  | 9.056  | 8.989  | 8.908  | 9.132  | 8.909  | 7.859  | 7.540  | 19942     | RPL27             | NM_011289_11_+1     |
| Rpl6     | 8.826  | 8.811  | 9.243  | 9.373  | 9.072  | 9.093  | 9.075  | 9.124  | 8.259  | 8.098  | 19988     | RPL6              | NM_011290_5_+1      |
| Rpl7     | 9.714  | 9.754  | 9.645  | 9.681  | 9.416  | 9.393  | 9.490  | 9.498  | 8.860  | 8.769  | 19989     | RPL7              | NM_011291_1_-1      |
| Rpl9     | 9.720  | 9.604  | 9.767  | 9.669  | 9.638  | 9.511  | 9.761  | 9.539  | 8.772  | 8.527  | 20005     | RPL9              | NM_011292_5_-1      |
| Polr2j   | 7.026  | 6.939  | 6.181  | 6.174  | 6.113  | 6.198  | 6.541  | 6.553  | 5.789  | 5.728  | 20022     | POLR2J            | NM_011293_5_+1      |
| Sub1     | 10.745 | 10.543 | 9.787  | 9.753  | 9.761  | 9.845  | 9.923  | 9.712  | 8.626  | 8.751  | 20024     | SUB1              | NM_011294_15_-1     |
| Rps12    | 8.133  | 7.981  | 8.609  | 8.548  | 8.391  | 8.268  | 8.796  | 8.483  | 7.148  | 6.989  | 20042     | RPS12             | NM_011295_10_-1     |
| Rps18    | 7.506  | 7.415  | 8.342  | 7.948  | 8.035  | 7.794  | 8.243  | 8.023  | 7.332  | 7.049  | 20084     | RPS18             | NM_011296_17_-1     |
| Rps24    | 2.914  | 3.049  | 1.133  | 0.934  | 2.523  | 1.875  | 2.459  | 1.753  | -0.767 | -0.299 | 20088     | RPS24             | NM_011297_14_+1     |
| Rps6ka2  | 2.193  | 0.932  | 3.460  | 3.322  | 1.680  | 1.377  | 2.251  | 1.497  | 3.402  | 2.123  | 20112     | RPS6KA2           | NM_011299_17_+1     |
| Rps7     | 8.987  | 8.570  | 9.342  | 9.039  | 9.221  | 8.904  | 9.453  | 9.123  | 8.382  | 7.935  | 20115     | RPS7              | NM_011300_12_-1     |
| Rs1      | -1.627 | -4.981 | -0.380 | -3.615 | -2.583 | -3.942 | -1.308 | -3.771 | -1.598 | -2.516 | 20147     | RS1               | NM_011302_X_+1      |
| Dhrs3    | 0.221  | 2.621  | 2.278  | 3.627  | 3.609  | 4.368  | 3.667  | 3.932  | 3.521  | 3.987  | 20148     | DHRS3             | NM_011303_4_+1      |
| Ruvbl2   | 5.121  | 4.963  | 4.927  | 5.034  | 4.934  | 5.025  | 4.857  | 5.206  | 4.898  | 4.691  | 20174     | RUVBL2            | NM_011304_7_-1      |
| Rxra     | 2.180  | 1.249  | 3.159  | 3.230  | 1.137  | 1.376  | 2.227  | 3.818  | 4.931  | 5.742  | 20181     | RXRA              | NM_011305_2_+1      |
| Rxrb     | 0.792  | 0.583  | 1.588  | 0.944  | 1.385  | 0.975  | 1.623  | 1.727  | 2.626  | 2.505  | 20182     | RXRB              | NM_011306_17_+1     |
| Uimc1    | 5.344  | 5.357  | 5.880  | 5.783  | 5.800  | 5.676  | 5.435  | 5.461  | 5.487  | 5.583  | 20184     | UIMC1             | NM_011307_13_-1     |
| Ncor1    | 6.525  | 6.734  | 6.348  | 6.024  | 6.326  | 6.366  | 6.479  | 5.921  | 5.607  | 5.584  | 20185     | NCOR1             | NM_011308_11_-1     |
| S100a1   | 3.669  | 3.824  | 4.921  | 4.925  | 2.551  | 2.773  | 4.725  | 5.009  | 5.011  | 5.077  | 20193     | S100A1            | NM_011309_3_-1      |
| S100a3   | -3.668 | -2.239 | -3.842 | -4.073 | 0.202  | 0.891  | 0.557  | -1.465 | -4.394 | -3.855 | 20197     | S100A3            | NM_011310_3_+1      |
| S100a4   | 4.361  | 3.373  | 6.311  | 5.654  | 10.111 | 9.890  | 10.335 | 9.394  | 9.632  | 9.418  | 20198     | S100A4            | NM_011311_3_+1      |
| S100a5   | -1.635 | -4.981 | -4.344 | -4.991 | 0.107  | -0.091 | -0.265 | -2.177 | -2.669 | -4.981 | 20199     | S100A5            | NM_011312_3_+1      |
| S100a6   | 8.927  | 8.549  | 6.533  | 5.455  | 9.058  | 8.565  | 9.360  | 8.637  | 9.792  | 9.302  | 20200     | S100A6            | NM_011313_3_+1      |
| Saa3     | -3.099 | -2.275 | -2.915 | -4.829 | -3.003 | -3.092 | -2.600 | -3.256 | 1.731  | 2.567  | 20210     | NA                | NM_011315_7_-1      |
| Khdrbs1  | 6.218  | 6.254  | 7.194  | 7.004  | 7.160  | 6.830  | 6.946  | 6.854  | 6.733  | 6.938  | 20218     | KHDRBS1           | NM_011317_4_-1      |
| Sars     | 3.034  | 2.552  | 2.555  | 2.517  | 2.238  | 1.933  | 1.749  | 1.796  | 2.684  | 1.817  | 20226     | SARS              | NM_011319_3_-1      |
| Scn1b    | -2.215 | -4.981 | -3.302 | -4.272 | -2.040 | -4.425 | -1.400 | -0.757 | 0.497  | 0.258  | 20266     | SCN1B             | NM_011322_7_-1      |
| Scnn1a   | -2.273 | -1.601 | -0.970 | -0.523 | -1.146 | -0.438 | 2.897  | 1.950  | 4.129  | 2.437  | 20276     | SCNN1A            | NM_011324_6_+1      |
| Scnn1g   | -4.981 | -4.981 | -4.329 | -2.451 | 0.484  | 2.085  | -1.398 | -1.153 | -4.981 | -4.981 | 20278     | SCNN1G            | NM_011326_7_+1      |
| Scp2     | 8.555  | 8.572  | 8.684  | 8.649  | 8.745  | 8.742  | 8.694  | 8.578  | 8.528  | 8.459  | 20280     | SCP2              | NM_011327_4_-1      |
| Sct      | 2.949  | 1.755  | -0.152 | -0.789 | -1.607 | -4.284 | -3.105 | -1.860 | -4.981 | -4.981 | 20287     | NA                | NM_011328_7_-1      |
| Ccl1     | -4.981 | -4.981 | -4.981 | -4.981 | -4.004 | -3.421 | -4.941 | -4.900 | -4.981 | -4.981 | 20290     | CCL1              | NM_011329_11_-1     |
| Ccl12    | -3.349 | -4.981 | -4.941 | -4.941 | -4.933 | -4.616 | -4.809 | -1.087 | -3.351 | -3.166 | 20293     | CCL2              | NM_011331_11_+1     |
| Ccl17    | -4.981 | -4.981 | 1.195  | -1.937 | -3.658 | -4.711 | 2.282  | 0.538  | -4.981 | -4.981 | 20295     | CCL17             | NM_011332_8_+1      |
| Ccl2     | -0.312 | -4.981 | 0.132  | 2.433  | -1.085 | -0.033 | 2.757  | 3.317  | 3.456  | 4.303  | 20296     | CCL13             | NM_011333_11_+1     |
| Ccln4    | 2.690  | 2.346  | 3.688  | 1.951  | 3.140  | 3.488  | 3.366  | 2.830  | 4.044  | 3.050  | 12727     | CLCN4             | NM_011334_7_-1      |
| Ccl21b   | -4.981 | -3.827 | -4.980 | -4.881 | -4.981 | -4.961 | -4.708 | -4.583 | -4.981 | -4.981 | 100042493 | CCL21             | NM_011335_4_+1      |
| Ccl21b   | -4.981 | -3.827 | -4.976 | -4.537 | -4.981 | -4.961 | -3.341 | -4.541 | -4.981 | -4.981 | 100042493 | CCL21             | NM_011335_dup1_4_+2 |
| Ccl21b   | -4.981 | -3.827 | -4.976 | -4.537 | -4.981 | -4.961 | -3.341 | -4.541 | -4.981 | -4.981 | 100042493 | CCL21             | NM_011335_dup2_4_+3 |
| Ccl21b   | -4.981 | -3.827 | -4.980 | -4.881 | -4.981 | -4.961 | -4.708 | -4.583 | -4.981 | -4.981 | 100042493 | CCL21             | NM_011335_dup3_4_+4 |
| Ccl27a   | -4.952 | -4.981 | -4.581 | -4.793 | -3.896 | -4.034 | -3.548 | -4.711 | -4.625 | -4.966 | 20301     | NA                | NM_011336_4_-1      |
| Ccl3     | 7.817  | 8.206  | 3.619  | 3.026  | 8.370  | 8.447  | 8.446  | 7.269  | 6.127  | 5.970  | 20302     | CCL3L3            | NM_011337_11_-1     |
| Ccl9     | 1.530  | -1.176 | 3.620  | 3.568  | 4.540  | 3.541  | 8.901  | 8.960  | 10.252 | 10.161 | 20308     | NA                | NM_011338_11_-1     |
| Serpinf1 | 5.265  | 5.235  | 5.970  | 5.982  | 0.308  | -0.929 | 1.385  | 2.789  | -0.098 | -0.894 | 20317     | SERPINF1          | NM_011340_11_-1     |
| Sdf4     | 5.125  | 6.140  | 5.908  | 6.481  | 5.770  | 6.369  | 5.622  | 6.181  | 6.123  | 6.397  | 20318     | SDF4              | NM_011341_4_+1      |
| Sec22b   | 7.036  | 7.194  | 6.325  | 6.571  | 6.410  | 6.679  | 6.258  | 6.484  | 6.060  | 6.334  | 20333     | SEC22B            | NM_011342_3_+1      |
| Sec61g   | 8.513  | 8.183  | 7.984  | 7.746  | 7.240  | 7.161  | 7.514  | 7.449  | 7.103  | 6.854  | 20335     | SEC61G            | NM_011343_11_-1     |
| Sel1l    | 2.335  | 1.455  | 3.065  | 3.227  | 2.899  | 2.380  | 2.732  | 2.370  | 3.153  | 3.543  | 20338     | SEL1L             | NM_011344_12_-1     |
| Sele     | -3.668 | -4.981 | -3.839 | -3.077 | -4.023 | -3.487 | -2.014 | -3.209 | -1.238 | -1.776 | 20339     | SELE              | NM_011345_1_+1      |
| Sell     | 10.622 | 10.484 | 6.547  | 6.719  | 1.955  | 4.448  | 4.750  | 7.071  | 9.455  | 9.184  | 20343     | SELL              | NM_011346_1_+1      |
| Selp     | 2.091  | 1.797  | -3.714 | -2.065 | -2.347 | -2.135 | -1.262 | -2.173 | 0.142  | 1.909  | 20344     | SELP              | NM_011347_1_+1      |
| Sema3e   | -4.981 | -3.267 | -4.268 | -4.978 | -4.505 | -4.669 | -4.652 | -4.679 | -4.981 | -4.981 | 20349     | SEMA3E            | NM_011348_5_+1      |
| Sema3f   | -2.739 | -4.981 | -3.428 | -2.238 | 1.359  | 2.523  | -1.988 | -1.913 | -4.981 | -4.981 | 20350     | SEMA3F            | NM_011349_9_-1      |
| Sema4f   | -4.293 | -4.080 | 4.529  | 4.010  | 0.893  | 0.889  | -2.093 | -2.598 | -4.981 | -4.559 | 20355     | SEMA4F            | NM_011350_6_-1      |
| Sema6c   | -3.090 | -3.315 | -4.981 | -4.981 | -4.903 | -4.919 | -4.448 | -4.964 | -3.750 | -3.480 | 20360     | SEMA6C            | NM_011351_3_+1      |
| Sema7a   | 4.092  | 4.283  | 2.150  | 2.939  | 3.778  | 3.930  | 2.620  | 2.287  | -4.981 | -3.855 | 20361     | SEMA7A            | NM_011352_9_+1      |
| Serf1    | 0.552  | 1.459  | 0.144  | 0.743  | -1.093 | -0.271 | -0.709 | 1.125  | -0.943 | -0.097 | 20365     | SERF1A SERF1B     | NM_011353_13_+1     |
| Serf2    | 9.668  | 9.537  | 10.044 | 10.016 | 9.672  | 9.767  | 9.986  | 9.859  | 9.334  | 9.271  | 378702    | SERF2             | NM_011354_2_+1      |

|            |        |        |        |        |        |        |        |        |        |        |        |            |                 |
|------------|--------|--------|--------|--------|--------|--------|--------|--------|--------|--------|--------|------------|-----------------|
| Spi1       | 6.327  | 5.926  | 8.647  | 8.724  | 9.301  | 9.171  | 9.096  | 8.930  | 9.345  | 9.213  | 20375  | SPI1       | NM_011355_2_+1  |
| Srsf2      | 8.390  | 8.545  | 8.495  | 8.553  | 8.424  | 8.562  | 8.247  | 8.549  | 7.948  | 8.026  | 20382  | SRSF2      | NM_011358_11_-1 |
| Sgce       | 1.462  | 0.566  | -3.857 | -2.568 | -4.946 | -3.803 | -4.859 | -4.793 | -4.981 | -2.750 | 20392  | SGCE       | NM_011360_6_-1  |
| Sgk1       | 0.896  | -0.166 | 6.768  | 6.949  | 4.814  | 5.264  | 6.537  | 7.503  | 7.534  | 8.168  | 20393  | SGK1       | NM_011361_10_+1 |
| Sh2b1      | 1.558  | 2.465  | 0.822  | 0.276  | 0.923  | 0.940  | -0.213 | 0.559  | 1.588  | 2.048  | 20399  | SH2B1      | NM_011363_7_-1  |
| Sh2d1a     | -1.576 | -1.459 | -3.444 | -1.136 | -2.602 | -0.246 | -2.308 | 1.054  | -4.394 | -3.480 | 20400  | SH2D1A     | NM_011364_X_+1  |
| Itsn2      | 4.844  | 5.132  | 5.205  | 5.389  | 5.568  | 5.889  | 5.639  | 5.524  | 5.625  | 6.066  | 20403  | ITSN2      | NM_011365_12_+1 |
| Sorbs3     | -3.588 | -4.981 | -4.518 | -4.606 | -4.931 | -4.468 | -2.433 | -2.360 | -4.981 | -4.848 | 20410  | SORBS3     | NM_011366_14_-1 |
| Shc1       | 5.362  | 5.349  | 6.114  | 6.166  | 5.603  | 5.745  | 5.824  | 5.973  | 6.873  | 6.969  | 20416  | SHC1       | NM_011368_3_+1  |
| Shcbp1     | -2.378 | -0.417 | 2.720  | 3.047  | 3.345  | 2.778  | 2.745  | 1.732  | 1.272  | 0.954  | 20419  | SHCBP1     | NM_011369_8_-1  |
| Cytip1     | 6.597  | 7.004  | 6.289  | 6.332  | 6.742  | 6.837  | 6.965  | 7.059  | 8.232  | 8.106  | 20430  | CYFIP1     | NM_011370_7_+1  |
| St6galnac1 | -4.981 | 1.491  | -4.837 | 5.169  | -4.864 | 3.704  | -4.772 | 2.157  | -4.981 | 0.266  | 20445  | ST6GALNAC1 | NM_011371_11_-1 |
| St6galnac3 | -2.362 | -4.981 | -4.157 | -2.265 | -0.184 | -0.410 | 1.535  | 1.035  | -3.531 | -1.726 | 20447  | ST6GALNAC3 | NM_011372_3_-1  |
| St6galnac4 | 3.286  | 3.561  | 3.288  | 4.443  | 3.100  | 3.539  | 3.411  | 4.672  | 4.086  | 4.578  | 20448  | ST6GALNAC4 | NM_011373_2_+1  |
| St8sia1    | 5.172  | 5.599  | 2.998  | 2.209  | 6.413  | 5.809  | 4.982  | 3.285  | 0.428  | -1.110 | 20449  | ST8SIA1    | NM_011374_6_-1  |
| St3gal5    | -4.500 | 0.795  | 2.154  | 3.180  | 1.197  | 1.098  | 0.968  | 0.459  | 1.320  | -2.648 | 20454  | ST3GAL5    | NM_011375_6_+1  |
| Sin3a      | 0.298  | -0.412 | -1.037 | -0.664 | -0.613 | -0.938 | -0.852 | -1.040 | 1.210  | 1.021  | 20466  | SIN3A      | NM_011378_9_+1  |
| Sipa1      | -3.183 | 1.102  | 1.532  | 1.527  | 1.725  | 1.696  | 1.939  | 1.469  | 2.500  | -0.168 | 20469  | SIPA1      | NM_011379_19_-1 |
| Six3       | -3.668 | -4.981 | -4.974 | -4.974 | 1.539  | 3.604  | -2.034 | -2.752 | -4.394 | -4.981 | 20473  | SIX3       | NM_011381_17_+1 |
| Six5       | 0.642  | 0.912  | -2.230 | -2.239 | -0.837 | 0.767  | -3.771 | -1.912 | -4.394 | -4.981 | 20475  | SIX5       | NM_011383_7_+1  |
| Ski        | 3.398  | 3.489  | 3.113  | 3.262  | 3.601  | 3.284  | 4.176  | 4.152  | 5.570  | 5.492  | 20481  | SKI        | NM_011385_4_-1  |
| Skil       | 3.842  | 4.482  | 3.903  | 4.179  | 3.976  | 3.951  | 3.429  | 4.486  | 4.412  | 4.304  | 20482  | SKIL       | NM_011386_3_+1  |
| Slc10a1    | -1.807 | -2.340 | -3.886 | -2.422 | -4.281 | -4.184 | -3.554 | -3.701 | -3.195 | -3.459 | 20493  | SLC10A1    | NM_011387_12_-1 |
| Slc12a7    | 1.000  | 1.649  | 4.238  | 2.761  | 1.213  | 0.736  | 1.551  | 2.154  | 3.569  | 3.686  | 20499  | SLC12A7    | NM_011390_13_+1 |
| Slc16a7    | 3.075  | 3.265  | 0.252  | 0.330  | 2.291  | 1.737  | 3.057  | 3.540  | 4.069  | 4.580  | 20503  | SLC16A7    | NM_011391_10_-1 |
| Slc1a2     | 1.602  | 0.778  | -3.487 | -2.020 | -2.459 | -2.258 | 1.646  | 2.383  | -1.911 | -4.316 | 20511  | SLC1A2     | NM_011393_2_+1  |
| Slc20a2    | 2.070  | 1.808  | 4.954  | 3.104  | 3.662  | 2.364  | 3.229  | 3.065  | 3.937  | 3.861  | 20516  | SLC20A2    | NM_011394_8_+1  |
| Slc22a3    | -2.073 | -0.441 | -3.623 | -2.118 | -3.056 | -2.289 | -2.488 | -1.197 | -4.981 | -2.421 | 20519  | SLC22A3    | NM_011395_17_-1 |
| Slc22a5    | 2.840  | 3.517  | 5.523  | 5.625  | 3.075  | 3.315  | 3.684  | 4.013  | 3.286  | 4.102  | 20520  | SLC22A5    | NM_011396_11_-1 |
| Slc23a1    | -1.903 | -1.257 | -1.578 | -1.776 | -1.910 | -3.156 | -1.828 | -1.698 | -1.199 | -1.776 | 20522  | SLC23A1    | NM_011397_18_-1 |
| Slc25a14   | -4.917 | -4.759 | -4.959 | -2.789 | -4.906 | -4.795 | -3.564 | -4.898 | -4.792 | -4.906 | 20523  | SLC25A14   | NM_011398_X_+1  |
| Slc25a17   | 6.131  | 6.226  | 5.824  | 5.833  | 5.667  | 5.729  | 5.600  | 5.706  | 5.782  | 5.619  | 20524  | SLC25A17   | NM_011399_15_-1 |
| Slc2a1     | 4.147  | 4.558  | 3.803  | 4.382  | 4.223  | 4.623  | 4.304  | 4.408  | 5.272  | 4.539  | 20525  | SLC2A1     | NM_011400_4_+1  |
| Slc2a3     | 5.367  | 5.468  | 3.655  | 3.424  | 6.723  | 6.497  | 5.330  | 4.190  | 2.386  | 1.871  | 20527  | SLC2A3     | NM_011401_6_-1  |
| Slc4a1     | -3.843 | 2.532  | 0.147  | 4.275  | 0.992  | 4.945  | 1.887  | 4.697  | 0.928  | 3.416  | 20533  | SLC4A1     | NM_011403_11_-1 |
| Slc7a5     | 4.045  | 4.135  | 3.746  | 4.177  | 3.650  | 4.874  | 3.161  | 3.720  | 3.021  | 2.566  | 20539  | SLC7A5     | NM_011404_8_-1  |
| Slc7a7     | -4.457 | -1.037 | -4.205 | -2.291 | -3.448 | -0.905 | -2.378 | -1.190 | -4.721 | 1.325  | 20540  | SLC7A7     | NM_011405_14_-1 |
| Slc8a1     | 0.644  | 0.912  | 1.476  | 1.062  | 1.925  | 2.288  | 1.106  | 1.882  | 0.235  | 1.916  | 20541  | SLC8A1     | NM_011406_17_-1 |
| Slfm1      | -3.668 | -2.126 | 0.238  | 0.718  | 1.237  | 1.989  | 3.966  | 4.450  | 8.303  | 7.251  | 20555  | NA         | NM_011407_11_+1 |
| Slfm2      | 6.679  | 6.272  | 7.266  | 6.876  | 8.475  | 7.859  | 8.715  | 8.415  | 9.630  | 9.294  | 20556  | NA         | NM_011408_11_+1 |
| Slfm3      | 0.301  | 0.658  | -0.387 | 0.247  | 1.052  | 0.240  | 0.106  | -0.777 | 2.960  | 2.334  | 20557  | SLFM12L    | NM_011409_11_+1 |
| Slfm4      | -4.981 | -4.981 | -4.228 | -4.207 | -4.708 | -0.335 | -1.106 | 1.160  | 5.327  | 4.458  | 20558  | SLFM12L    | NM_011410_11_+1 |
| C4a        | -0.292 | -0.431 | -0.897 | -1.276 | 0.168  | 0.020  | 0.288  | 0.291  | 0.353  | 0.285  | 625018 | C4A C4B    | NM_011413_17_-1 |
| Slpi       | 8.179  | 9.716  | 4.615  | 3.768  | 5.868  | 4.791  | 5.780  | 6.461  | 7.142  | 6.732  | 20568  | SLPI       | NM_011414_2_-1  |
| Snai2      | -4.981 | -4.981 | -3.808 | -4.579 | -4.370 | -4.681 | -3.222 | -4.741 | -4.981 | -4.981 | 20583  | SNAI2      | NM_011415_16_+1 |
| Smarca2    | 4.850  | 4.916  | 5.547  | 5.461  | 6.399  | 6.550  | 5.950  | 5.759  | 5.855  | 5.736  | 67155  | SMARCA2    | NM_011416_19_+1 |
| Smarca4    | 4.359  | 5.101  | 4.569  | 4.906  | 4.788  | 4.278  | 4.400  | 4.629  | 4.832  | 4.286  | 20586  | SMARCA4    | NM_011417_9_+1  |
| Smarcb1    | 5.305  | 5.691  | 4.788  | 5.205  | 4.902  | 4.896  | 4.279  | 4.575  | 2.920  | 3.610  | 20587  | SMARCB1    | NM_011418_10_-1 |
| Smn1       | 4.790  | 4.762  | 4.453  | 4.403  | 4.578  | 4.354  | 4.376  | 4.078  | 4.604  | 4.413  | 20595  | SMN1 SMN2  | NM_011420_13_+1 |
| Smpd1      | 4.162  | 4.180  | 3.582  | 4.095  | 3.707  | 3.550  | 4.140  | 4.352  | 4.992  | 5.060  | 20597  | SMPD1      | NM_011421_7_+1  |
| Ncor2      | 2.075  | 2.489  | 3.322  | 3.125  | 3.850  | 3.375  | 3.819  | 3.591  | 4.614  | 4.391  | 20602  | NCOR2      | NM_011424_5_-1  |
| Siglec1    | -0.694 | -1.814 | -0.035 | -0.428 | -0.253 | -1.164 | 0.534  | 2.208  | 5.046  | 3.923  | 20612  | SIGLEC1    | NM_011426_2_-1  |
| Snai1      | -1.186 | -0.446 | -1.575 | -2.140 | 0.369  | -0.690 | -1.862 | -3.054 | -4.981 | -2.753 | 20613  | SNAI1      | NM_011427_2_+1  |
| Eftud2     | 5.590  | 5.320  | 6.044  | 5.960  | 6.085  | 5.868  | 5.891  | 6.008  | 6.429  | 6.114  | 20624  | EFTUD2     | NM_011431_11_-1 |
| Snrpc      | 6.142  | 5.786  | 5.984  | 5.845  | 6.067  | 5.938  | 6.146  | 5.834  | 5.452  | 5.150  | 20630  | NA         | NM_011432_17_+1 |
| Sod1       | 6.808  | 6.561  | 7.194  | 6.737  | 6.309  | 5.653  | 6.714  | 5.813  | 5.491  | 3.876  | 20655  | SOD1       | NM_011434_16_+1 |
| Sod3       | -3.189 | -4.981 | -4.958 | -2.904 | -4.160 | -4.896 | -0.313 | -0.082 | -4.981 | -2.750 | 20657  | SOD3       | NM_011435_5_+1  |
| Sorl1      | 5.094  | 6.110  | 5.038  | 4.672  | 6.405  | 6.386  | 6.602  | 6.782  | 8.319  | 8.485  | 20660  | SORL1      | NM_011436_9_-1  |
| Sox12      | 0.671  | 0.603  | 1.051  | 0.299  | 0.320  | 0.302  | -0.066 | -0.393 | -2.396 | -2.309 | 20667  | SOX12      | NM_011438_2_-1  |
| Sox13      | -4.981 | -1.773 | -2.874 | -1.943 | -3.533 | -1.477 | -3.162 | -1.585 | 0.492  | 0.925  | 20668  | SOX13      | NM_011439_1_-1  |
| Sox5       | -4.981 | -2.118 | -4.981 | -4.981 | -3.996 | -4.932 | -4.752 | -4.909 | -4.981 | -4.981 | 20678  | SOX5       | NM_011444_6_-1  |
| Sox6       | -4.981 | -3.522 | -4.844 | -4.847 | -4.778 | -4.967 | -4.840 | -4.916 | -4.981 | -4.793 | 20679  | SOX6       | NM_011445_7_-1  |
| Sox8       | -1.287 | -3.408 | -3.822 | -3.162 | -2.950 | -3.757 | -4.586 | -4.410 | -0.547 | -0.385 | 20681  | SOX8       | NM_011447_17_-1 |
| Spa17      | 2.269  | 1.273  | 0.049  | -0.991 | 0.250  | -1.177 | -0.088 | -2.977 | -1.192 | -2.421 | 20686  | SPA17      | NM_011449_9_-1  |
| Sphk1      | -4.981 | -2.547 | -4.755 | -0.865 | -2.296 | -2.298 | -2.733 | -0.582 | -2.133 | -0.678 | 20698  | SPHK1      | NM_011451_11_+1 |
| Serpinb9b  | -2.178 | -4.981 | -1.905 | -0.197 | -3.541 | -4.834 | -1.527 | -3.179 | -2.989 | -4.981 | 20706  | NA         | NM_011452_13_+1 |
| Serpinb9c  | -4.981 | -0.751 | -4.981 | -4.981 | -4.981 | -4.981 | -4.981 | -4.981 | -4.981 | -4.981 | 20707  | NA         | NM_011453_13_-1 |
| Serpinb6b  | 3.881  | 3.583  | 7.222  | 7.279  | 3.885  | 4.448  | 2.642  | 2.396  | -1.668 | -1.845 | 20708  | NA         | NM_011454_13_+1 |
| Serpinb8   | -0.023 | -4.981 | 5.654  | 5.778  | -1.407 | -4.273 | 1.893  | 3.434  | 4.390  | 5.431  | 20725  | SERPINB8   | NM_011459_1_+1  |
| Spic       | 4.161  | 2.900  | 4.460  | 5.806  | 5.150  | 4.875  | 5.668  | 7.082  | 3.042  | 5.281  | 20728  | SPIC       | NM_011461_10_-1 |
| Spin1      | -4.041 | -4.184 | -4.069 | -4.719 | -3.117 | -4.854 | -4.389 | -4.803 | -3.612 | -4.250 | 20729  | SPIN1      | NM_011462_13_+1 |
| Spint2     | 5.083  | 4.319  | 4.066  | 4.337  | 3.584  | 3.775  | 2.544  | 2.185  | -1.435 | -3.079 | 20733  | SPINT2     | NM_011464_7_-1  |
| Spta1      | -4.981 | 0.340  | -1.192 | 2.026  | -0.821 | 2.639  | -3.101 | 1.925  | -4.981 | 0.587  | 20739  | SPTA1      | NM_011465_1_+1  |
| Spr        | 5.343  | 5.112  | 4.849  | 5.094  | 5.255  | 5.147  | 5.031  | 4.703  | 4.578  | 4.315  | 20751  | SPR        | NM_011467_6_-1  |

|         |        |        |        |        |        |        |        |        |        |        |           |         |                 |
|---------|--------|--------|--------|--------|--------|--------|--------|--------|--------|--------|-----------|---------|-----------------|
| Sptlc2  | 6.084  | 5.930  | 6.389  | 6.142  | 6.583  | 6.354  | 6.628  | 6.626  | 7.469  | 7.464  | 20773     | SPTLC2  | NM_011479_12_-1 |
| Srebfb1 | 5.041  | 4.855  | 4.657  | 4.615  | 4.999  | 4.832  | 5.181  | 5.090  | 5.903  | 5.754  | 20787     | SREBF1  | NM_011480_11_-1 |
| Srms    | -2.842 | -4.981 | -2.969 | -3.412 | 2.360  | 2.642  | 0.123  | 0.024  | -4.981 | -4.981 | 20811     | SRMS    | NM_011481_2_-1  |
| Nhp2l1  | 8.291  | 8.169  | 7.497  | 7.508  | 7.614  | 7.601  | 7.587  | 7.405  | 6.185  | 5.919  | 20826     | SNU13   | NM_011482_15_-1 |
| Stam    | 4.741  | 4.979  | 3.992  | 4.242  | 4.111  | 4.153  | 4.202  | 4.184  | 4.521  | 4.855  | 20844     | STAM    | NM_011484_2_+1  |
| Star    | 1.697  | 1.033  | 0.399  | 0.316  | 1.322  | 0.162  | 0.737  | 0.422  | 1.179  | 0.559  | 20845     | STAR    | NM_011485_8_+1  |
| Stat3   | 5.019  | 4.907  | 4.252  | 4.936  | 4.787  | 4.942  | 5.280  | 5.048  | 5.116  | 5.225  | 20848     | STAT3   | NM_011486_11_-1 |
| Stat4   | 1.779  | 1.844  | 2.918  | 1.492  | 4.933  | 4.255  | 4.089  | 3.487  | 2.673  | 0.778  | 20849     | STAT4   | NM_011487_1_+1  |
| Stat5a  | 3.688  | 3.424  | 3.986  | 3.867  | 4.336  | 3.930  | 4.483  | 4.004  | 4.974  | 5.088  | 20850     | STAT5A  | NM_011488_11_+1 |
| Stat5b  | 3.564  | 3.179  | 3.824  | 3.537  | 4.375  | 4.259  | 4.996  | 4.985  | 5.967  | 5.643  | 20851     | STAT5B  | NM_011489_11_-1 |
| Stau1   | -3.780 | -3.367 | -3.808 | -4.593 | -3.169 | -4.783 | -3.956 | -4.723 | -4.189 | -1.108 | 20853     | STAU1   | NM_011490_2_-1  |
| Stc2    | -4.981 | -4.981 | -4.967 | -3.378 | -4.966 | -2.791 | -4.847 | -3.838 | -4.981 | -3.498 | 20856     | STC2    | NM_011491_11_-1 |
| Stk11   | 3.573  | 3.982  | 3.002  | 3.476  | 3.019  | 3.858  | 3.876  | 3.014  | 3.431  | 3.151  | 20869     | STK11   | NM_011492_10_+1 |
| Stk16   | 4.716  | 4.649  | 4.063  | 4.347  | 3.848  | 3.962  | 3.947  | 4.481  | 4.783  | 4.693  | 20872     | STK16   | NM_011494_1_+1  |
| Plk4    | 1.302  | 0.835  | 4.795  | 4.494  | 3.599  | 3.153  | 3.199  | 3.213  | 2.511  | 1.980  | 20873     | PLK4    | NM_011495_3_+1  |
| Aurkb   | 2.535  | 0.851  | 4.166  | 4.370  | 4.641  | 3.937  | 4.288  | 4.180  | 4.060  | 3.490  | 20877     | AURKB   | NM_011496_11_+1 |
| Aurka   | -4.076 | 0.420  | -1.096 | 0.913  | 0.408  | 0.662  | 0.296  | -0.171 | -0.365 | -1.379 | 20878     | AURKA   | NM_011497_2_-1  |
| Bhlhe40 | 6.234  | 6.499  | 5.966  | 6.403  | 8.587  | 8.592  | 7.925  | 7.471  | 6.162  | 6.256  | 20893     | BHLHE40 | NM_011498_6_+1  |
| Strap   | 6.612  | 6.383  | 6.859  | 6.935  | 6.612  | 6.666  | 6.624  | 6.545  | 6.466  | 6.551  | 20901     | STRAP   | NM_011499_6_+1  |
| Strn    | 0.823  | 1.275  | 2.958  | 2.384  | 2.319  | 1.691  | 2.514  | 2.046  | 3.966  | 3.701  | 268980    | STRN    | NM_011500_17_-1 |
| Stx3    | -4.174 | -4.639 | -3.495 | -4.938 | -4.864 | -4.955 | -4.450 | -4.098 | -4.702 | -4.935 | 20908     | STX3    | NM_011502_19_-1 |
| Stxbp2  | 7.915  | 7.947  | 7.299  | 7.528  | 7.521  | 7.547  | 7.478  | 7.515  | 7.709  | 7.357  | 20911     | STXBP2  | NM_011503_8_+1  |
| Stxbp3  | 5.185  | 5.685  | 6.636  | 6.500  | 6.166  | 5.924  | 6.801  | 6.412  | 6.027  | 6.463  | 20912     | STXBP3  | NM_011504_3_-1  |
| Stxbp4  | 1.407  | 1.916  | 0.210  | 0.644  | 0.425  | 1.242  | -0.330 | 1.214  | -0.545 | 1.555  | 20913     | STXBP4  | NM_011505_11_-1 |
| Suc1a2  | 6.311  | 6.454  | 6.619  | 6.650  | 5.976  | 6.078  | 6.131  | 6.233  | 6.194  | 6.170  | 20916     | SUCLA2  | NM_011506_14_+1 |
| Suc1g2  | 4.621  | 3.018  | 4.834  | 3.331  | 5.205  | 3.475  | 4.751  | 3.109  | 4.368  | 2.866  | 20917     | SUCLG2  | NM_011507_6_-1  |
| Eif1    | 10.526 | 10.615 | 10.021 | 10.210 | 10.463 | 10.553 | 10.384 | 10.566 | 9.726  | 10.058 | 20918     | NA      | NM_011508_11_+1 |
| Supt4b  | -1.561 | -1.008 | -1.368 | -2.799 | -1.305 | -2.671 | -1.696 | -2.210 | -1.535 | -1.928 | 100041294 | NA      | NM_011509_10_-1 |
| Abcc8   | -4.981 | -4.981 | -4.981 | -4.981 | -3.484 | -1.414 | -4.861 | -4.430 | -4.981 | -4.981 | 20927     | ABCC8   | NM_011510_7_-1  |
| Abcc9   | -4.981 | -4.981 | -4.919 | -4.200 | -4.586 | -2.172 | -3.603 | -1.576 | -4.060 | -0.696 | 20928     | ABCC9   | NM_011511_6_-1  |
| Surf4   | 8.461  | 8.421  | 8.066  | 8.163  | 8.104  | 7.945  | 7.943  | 8.167  | 8.734  | 8.728  | 20932     | SURF4   | NM_011512_2_-1  |
| Med22   | 4.087  | 4.229  | 3.509  | 3.713  | 3.419  | 3.056  | 3.636  | 3.755  | 4.787  | 4.780  | 20933     | MED22   | NM_011513_2_-1  |
| Suv39h1 | 3.199  | 2.151  | 3.282  | 4.350  | 3.632  | 3.637  | 4.157  | 3.880  | 3.088  | 3.040  | 20937     | SUV39H1 | NM_011514_X_-1  |
| Sycp3   | -3.349 | -0.314 | -2.916 | -4.534 | -4.806 | -4.398 | -4.081 | -4.148 | -3.531 | -2.696 | 20962     | SYCP3   | NM_011517_10_+1 |
| Syk     | 6.986  | 7.086  | 2.937  | 2.322  | 4.711  | 4.022  | 5.799  | 5.085  | 5.260  | 3.153  | 20963     | SYK     | NM_011518_13_+1 |
| Sdc1    | 3.957  | 5.548  | -3.749 | 0.447  | -2.543 | -1.088 | 1.164  | 3.937  | 2.264  | 2.679  | 20969     | SDC1    | NM_011519_12_+1 |
| Sdc3    | 3.493  | 2.933  | 6.802  | 6.712  | 4.964  | 3.794  | 6.319  | 6.429  | 7.501  | 6.443  | 20970     | SDC3    | NM_011520_4_+1  |
| Sdc4    | 7.752  | 7.101  | 2.099  | 2.660  | 3.148  | 3.153  | 4.228  | 4.176  | -0.562 | -0.096 | 20971     | SDC4    | NM_011521_2_-1  |
| Syngr3  | -4.981 | -4.981 | -2.154 | -4.942 | -2.665 | -1.239 | -3.995 | -3.720 | -4.981 | -4.981 | 20974     | SYNGR3  | NM_011522_17_-1 |
| Synj2   | -0.346 | -3.873 | -2.004 | -1.852 | -4.720 | -4.934 | -4.406 | -4.170 | -2.265 | -3.840 | 20975     | SYNJ2   | NM_011523_17_+1 |
| Tagln   | -1.172 | -2.275 | -1.203 | -0.959 | -1.433 | -2.208 | -0.295 | -0.839 | -0.419 | 0.234  | 21345     | TAGLN   | NM_011526_9_-1  |
| Tal1    | -4.981 | -1.215 | -5.003 | 0.009  | -1.633 | 0.032  | -2.537 | 0.291  | -2.379 | -1.189 | 21349     | TAL1    | NM_011527_4_+1  |
| Taldo1  | 9.504  | 9.401  | 10.608 | 10.580 | 10.351 | 10.275 | 9.862  | 9.792  | 10.264 | 10.127 | 21351     | TALDO1  | NM_011528_7_+1  |
| Tank    | 3.817  | 3.478  | 5.308  | 5.683  | 6.006  | 5.893  | 5.496  | 5.158  | 3.526  | 3.770  | 21353     | TANK    | NM_011529_2_+1  |
| Tap2    | 6.834  | 6.800  | 8.508  | 8.746  | 7.640  | 7.678  | 7.282  | 7.342  | 6.883  | 6.458  | 21355     | TAP2    | NM_011530_17_+1 |
| Tbx10   | -4.981 | -4.981 | -4.143 | -3.884 | -4.954 | -4.683 | -4.810 | -4.672 | -4.981 | -4.981 | 109575    | TBX10   | NM_011533_19_+1 |
| Tbx3    | -4.981 | -4.981 | -4.949 | -2.905 | -1.369 | -3.789 | -3.870 | -4.603 | -4.981 | -4.981 | 21386     | TBX3    | NM_011535_5_+1  |
| Tbx6    | -0.280 | -0.742 | -2.900 | -2.718 | -2.139 | -2.527 | -0.804 | -1.354 | 0.292  | -0.244 | 21389     | TBX6    | NM_011538_7_+1  |
| Tbxas1  | 1.792  | 1.404  | 5.143  | 5.545  | 2.193  | 0.715  | 4.216  | 4.851  | 5.287  | 5.139  | 21391     | TBXAS1  | NM_011539_6_+1  |
| Tcap    | -2.948 | -0.202 | -4.270 | -4.020 | -3.620 | -3.558 | -2.408 | -3.605 | -2.012 | -2.743 | 21393     | TCAP    | NM_011540_11_+1 |
| Tcea1   | 6.938  | 6.990  | 6.908  | 6.924  | 7.089  | 7.085  | 7.223  | 7.028  | 6.560  | 6.652  | 21399     | TCEA1   | NM_011541_1_+1  |
| Tcea3   | -4.981 | -4.981 | 1.142  | -1.805 | 0.903  | -2.160 | 3.457  | -0.645 | 3.364  | -1.398 | 21401     | TCEA3   | NM_011542_4_+1  |
| Skp1a   | 8.619  | 8.376  | 7.765  | 7.579  | 7.903  | 7.532  | 7.392  | 7.164  | 6.760  | 6.441  | 21402     | SKP1    | NM_011543_11_+1 |
| Tcf12   | 4.732  | 4.441  | 3.029  | 2.513  | 2.094  | 1.960  | 2.549  | 0.961  | 2.756  | 2.611  | 21406     | TCF12   | NM_011544_9_-1  |
| Tcf21   | -2.739 | -1.693 | -2.409 | -4.479 | -4.859 | -4.929 | -3.467 | -4.338 | -2.712 | -4.981 | 21412     | TCF21   | NM_011545_10_-1 |
| Zeb1    | 3.613  | 3.569  | 4.924  | 4.891  | 4.998  | 4.965  | 3.844  | 3.449  | 2.389  | 1.435  | 21417     | ZEB1    | NM_011546_18_+1 |
| Tfap2a  | -3.349 | -3.233 | -4.237 | -4.290 | -4.288 | -4.768 | -4.315 | -4.032 | -4.394 | -4.342 | 21418     | TFAP2A  | NM_011547_13_-1 |
| Tcf3    | 2.823  | 3.439  | 2.017  | 2.139  | 2.507  | 2.450  | 2.078  | 2.648  | 2.992  | 2.394  | 21423     | TCF3    | NM_011548_10_-1 |
| Tfeb    | 2.995  | 2.519  | -1.240 | -0.054 | 1.701  | 2.201  | 3.264  | 1.650  | 1.316  | 2.517  | 21425     | TFEB    | NM_011549_17_+1 |
| Mlx     | 3.193  | 3.247  | 2.436  | 2.701  | 2.516  | 1.842  | 2.478  | 2.420  | 3.365  | 3.618  | 21428     | MLX     | NM_011550_11_+1 |
| Ubtf    | 4.666  | 4.951  | 4.596  | 4.908  | 4.560  | 4.674  | 4.074  | 4.749  | 4.279  | 4.814  | 21429     | UBTF    | NM_011551_11_-1 |
| Tcof1   | 3.255  | 3.512  | 4.273  | 3.592  | 4.694  | 4.226  | 4.748  | 4.391  | 5.421  | 5.024  | 21453     | TCOF1   | NM_011552_18_-1 |
| Tcp10a  | -4.981 | -4.981 | -4.394 | -4.657 | -4.352 | -4.708 | -4.920 | -4.949 | -4.981 | -3.971 | 21461     | NA      | NM_011553_17_+1 |
| Tcte3   | -3.810 | -4.981 | -3.674 | -4.602 | -4.961 | -4.816 | -4.755 | -4.806 | -4.915 | -4.273 | 21647     | TCTE3   | NM_011560_17_-2 |
| Tdg     | -3.790 | -4.040 | -2.853 | -4.622 | -1.180 | -4.703 | -3.555 | -4.799 | -4.357 | -4.366 | 21665     | TDG     | NM_011561_10_+1 |
| Tdgf1   | -3.349 | -4.981 | -1.442 | -3.252 | -3.660 | -4.334 | -4.211 | -2.758 | -4.981 | -4.981 | 21667     | TDGF1   | NM_011562_9_-1  |
| Prdx2   | 7.629  | 7.248  | 7.992  | 8.045  | 6.949  | 7.410  | 7.177  | 7.558  | 7.122  | 6.512  | 21672     | PRDX2   | NM_011563_8_+1  |
| Tead2   | -4.119 | -3.777 | -3.819 | -4.718 | -4.786 | -4.932 | -4.360 | -3.434 | -4.358 | -4.713 | 21677     | TEAD2   | NM_011565_7_+1  |
| Tead3   | -4.981 | -4.981 | -4.974 | -4.981 | -4.981 | -4.981 | -4.977 | -4.974 | -4.981 | -4.981 | 21678     | TEAD3   | NM_011566_17_-1 |
| Alyref  | 7.138  | 7.012  | 7.615  | 7.746  | 7.575  | 7.321  | 7.080  | 6.976  | 6.186  | 6.026  | 21681     | NA      | NM_011568_11_-1 |
| Tesk1   | 4.875  | 4.738  | 5.238  | 4.661  | 5.050  | 4.660  | 5.208  | 5.214  | 5.170  | 5.623  | 21754     | TESK1   | NM_011571_4_+1  |
| Tex264  | 2.495  | 2.324  | 0.430  | 1.101  | -0.576 | 1.039  | 0.478  | 1.183  | 1.477  | 1.136  | 21767     | TEX264  | NM_011573_9_-1  |
| Cirh1a  | 4.492  | 4.413  | 4.719  | 4.708  | 4.658  | 4.502  | 4.456  | 4.631  | 3.953  | 3.964  | 21771     | UTP4    | NM_011574_8_+1  |
| Tfpi    | 1.160  | 0.315  | 0.119  | -0.338 | -1.448 | -2.184 | 0.888  | 0.512  | 0.499  | 0.981  | 21788     | TFPI    | NM_011576_2_-1  |

|          |        |        |        |        |        |        |        |        |        |        |           |          |                 |
|----------|--------|--------|--------|--------|--------|--------|--------|--------|--------|--------|-----------|----------|-----------------|
| Tgfb1    | 5.148  | 5.245  | 5.912  | 6.031  | 6.208  | 6.245  | 6.411  | 6.734  | 7.712  | 7.922  | 21803     | TGFB1    | NM_011577_7_+1  |
| Tgfb1b   | 2.083  | 1.354  | -1.008 | -1.328 | -2.603 | -1.189 | 2.857  | 2.727  | 3.259  | 2.806  | 21814     | TGFB1B   | NM_011578_5_-1  |
| Tgtp1    | 1.681  | 0.412  | 5.838  | 5.971  | 4.696  | 3.603  | 4.292  | 3.649  | 1.386  | 1.286  | 21822     | NA       | NM_011579_11_-1 |
| Thbs1    | -2.123 | -4.981 | -1.165 | -0.273 | -1.253 | -1.740 | 0.978  | 2.412  | 8.248  | 7.079  | 21825     | THBS1    | NM_011580_2_+1  |
| Thbs4    | -4.981 | -4.981 | -4.855 | -1.464 | -4.981 | -4.981 | -4.954 | -4.968 | -4.981 | -4.981 | 21828     | THBS4    | NM_011582_13_-1 |
| Nr1d2    | 2.501  | 2.405  | 2.206  | 1.843  | 3.467  | 3.461  | 2.734  | 3.000  | 2.759  | 3.624  | 353187    | NR1D2    | NM_011584_14_-1 |
| Tia1     | 5.207  | 5.448  | 5.230  | 5.032  | 5.381  | 5.476  | 5.115  | 5.004  | 5.033  | 5.149  | 21841     | TIA1     | NM_011585_6_+1  |
| Myo18a   | 1.155  | 1.541  | 5.513  | 5.312  | 2.640  | 2.019  | 3.879  | 4.040  | 4.792  | 5.090  | 360013    | MYO18A   | NM_011586_11_+1 |
| Tie1     | -1.694 | -4.981 | -3.304 | -1.980 | -4.631 | -3.288 | -4.754 | -1.319 | -4.981 | 1.016  | 21846     | TIE1     | NM_011587_4_-1  |
| Trim28   | 5.320  | 5.447  | 5.915  | 6.217  | 6.210  | 6.221  | 6.007  | 5.962  | 5.221  | 5.371  | 21849     | TRIM28   | NM_011588_7_+1  |
| Timeless | -0.360 | -2.846 | 0.710  | 1.594  | -0.266 | 0.331  | -0.417 | 0.717  | 1.024  | -4.192 | 21853     | TIMELESS | NM_011589_10_+1 |
| Timm17a  | 6.783  | 6.852  | 6.121  | 6.296  | 5.993  | 6.152  | 5.840  | 5.997  | 5.264  | 5.084  | 21854     | TIMM17A  | NM_011590_1_-1  |
| Timm17b  | 6.413  | 6.500  | 5.731  | 5.886  | 5.793  | 5.979  | 5.615  | 5.973  | 4.570  | 4.748  | 21855     | TIMM17B  | NM_011591_X_+1  |
| Timm44   | 5.503  | 5.628  | 5.101  | 5.124  | 5.197  | 5.252  | 5.205  | 5.435  | 5.163  | 5.056  | 21856     | TIMM44   | NM_011592_8_-1  |
| Timp1    | -4.981 | -4.981 | -4.877 | -4.236 | -4.945 | -4.945 | -4.790 | -2.585 | -4.774 | -4.942 | 21857     | TIMP1    | NM_011593_X_+1  |
| Timp2    | 7.706  | 7.912  | 3.347  | 3.204  | 2.545  | 2.618  | 3.800  | 5.110  | 6.237  | 6.372  | 21858     | TIMP2    | NM_011594_11_-1 |
| Timp3    | -1.221 | -4.981 | -3.711 | -0.784 | -2.964 | -2.638 | -1.848 | -3.887 | -1.533 | -4.981 | 21859     | TIMP3    | NM_011595_10_+1 |
| Atp6v0a2 | 4.642  | 4.934  | 7.498  | 7.572  | 5.719  | 5.547  | 6.353  | 6.338  | 6.420  | 6.601  | 21871     | ATP6V0A2 | NM_011596_5_+1  |
| Tjp2     | 1.738  | -3.053 | -3.366 | -2.805 | -2.108 | -0.130 | -1.484 | -0.643 | -1.142 | -1.664 | 21873     | TJP2     | NM_011597_19_-1 |
| Tle1     | 1.727  | 2.418  | 1.803  | 1.605  | 1.500  | 0.603  | 2.646  | 2.621  | 2.028  | 2.603  | 21885     | TLE1     | NM_011599_4_-1  |
| Tle4     | 4.244  | 4.114  | 4.142  | 4.324  | 4.176  | 3.937  | 4.421  | 4.257  | 4.431  | 4.781  | 21888     | TLE4     | NM_011600_19_-1 |
| Tln1     | 7.328  | 7.236  | 8.679  | 8.623  | 8.910  | 8.953  | 8.985  | 9.072  | 10.050 | 10.131 | 21894     | TLN1     | NM_011602_4_-1  |
| Tbpl1    | 5.625  | 5.774  | 5.736  | 6.033  | 5.657  | 5.624  | 5.717  | 5.977  | 5.607  | 6.270  | 237336    | TBPL1    | NM_011603_10_-1 |
| Tlr6     | 1.791  | 2.901  | 2.698  | 3.364  | 3.323  | 4.193  | 3.740  | 4.235  | 4.668  | 5.374  | 21899     | TLR6     | NM_011604_5_-1  |
| Tmpo     | 2.239  | 2.706  | 5.214  | 4.809  | 5.018  | 4.698  | 4.963  | 4.979  | 6.623  | 6.547  | 21917     | TMPO     | NM_011605_10_-1 |
| Tnfrsf17 | -1.215 | -0.904 | -2.495 | -1.765 | -4.581 | -3.697 | 1.020  | 3.861  | -4.981 | -3.816 | 21935     | TNFRSF17 | NM_011608_16_+1 |
| Tnfrsf1a | 5.062  | 5.165  | 6.467  | 6.529  | 6.177  | 5.710  | 7.068  | 7.410  | 8.517  | 8.548  | 21937     | TNFRSF1A | NM_011609_6_+1  |
| Tnfrsf1b | 4.267  | 4.422  | 5.941  | 6.238  | 7.286  | 7.114  | 8.349  | 8.345  | 10.692 | 10.412 | 21938     | TNFRSF1B | NM_011610_4_-1  |
| Cd40     | 2.616  | 2.089  | 6.407  | 6.770  | 6.356  | 6.324  | 6.332  | 6.265  | 4.738  | 5.756  | 21939     | CD40     | NM_011611_2_+1  |
| Tnfrsf9  | -4.859 | -4.602 | -4.060 | -4.839 | -4.783 | -4.914 | -4.804 | -3.571 | -4.981 | -4.854 | 21942     | TNFRSF9  | NM_011612_4_+1  |
| Tnfsf11  | -4.981 | -1.296 | -3.692 | -3.722 | -4.952 | -4.716 | -2.644 | -1.585 | -4.981 | -4.981 | 21943     | TNFSF11  | NM_011613_14_-1 |
| Tnfsf12  | -2.948 | -1.460 | -0.691 | -0.655 | -2.330 | -3.404 | 1.286  | 1.420  | 3.812  | 3.375  | 21944     | TNFSF12  | NM_011614_11_-1 |
| Dedd     | 4.018  | 4.737  | 4.102  | 4.291  | 4.078  | 3.821  | 3.193  | 4.086  | 4.327  | 4.208  | 21945     | DEDD     | NM_011615_1_+1  |
| Cd40lg   | -1.695 | -4.981 | -3.091 | -0.964 | -3.035 | -0.694 | -0.897 | 0.123  | -3.204 | -1.692 | 21947     | CD40LG   | NM_011616_X_+1  |
| Cd70     | -1.365 | -4.981 | 0.322  | 0.238  | -0.919 | -0.617 | -2.941 | -2.158 | -4.981 | -4.981 | 21948     | CD70     | NM_011617_17_-1 |
| Tnnt1    | -4.657 | -3.741 | -4.794 | -4.652 | -4.789 | -4.898 | -4.232 | -4.734 | -3.961 | -4.382 | 21955     | TNNT1    | NM_011618_7_-1  |
| Tnnt2    | -2.739 | -0.445 | -1.659 | -1.222 | -1.633 | -2.787 | -4.892 | -3.609 | -4.981 | -4.981 | 21956     | TNNT2    | NM_011619_1_+1  |
| Tnnt3    | -3.370 | -0.535 | -1.314 | -4.287 | -2.347 | -4.114 | -2.191 | -4.138 | -0.514 | -4.061 | 21957     | TNNT3    | NM_011620_7_+1  |
| Tom1     | 7.220  | 7.278  | 3.514  | 3.828  | 3.187  | 3.584  | 4.316  | 4.702  | 7.067  | 6.369  | 21968     | TOM1     | NM_011622_8_+1  |
| Top2a    | 0.868  | 1.224  | 4.883  | 5.080  | 6.054  | 5.422  | 5.469  | 4.864  | 3.576  | 3.057  | 21973     | TOP2A    | NM_011623_11_-1 |
| Top3b    | 4.944  | 4.961  | 5.107  | 5.213  | 5.379  | 5.305  | 5.216  | 5.270  | 5.024  | 5.148  | 21976     | TOP3B    | NM_011624_16_+1 |
| Ppp1r13b | 4.643  | 4.379  | 4.407  | 4.171  | 4.454  | 4.300  | 3.794  | 4.001  | 3.389  | 3.531  | 21981     | PPP1R13B | NM_011625_12_-1 |
| Tmem165  | 5.971  | 5.996  | 5.723  | 5.655  | 5.174  | 5.215  | 5.469  | 5.800  | 6.739  | 7.176  | 21982     | TMEM165  | NM_011626_5_+1  |
| Tpbg     | -4.981 | -4.981 | -3.969 | -4.815 | -4.854 | -4.905 | -4.466 | -4.856 | -4.593 | -4.365 | 21983     | TPBG     | NM_011627_9_+1  |
| Nr2c1    | 2.426  | 2.716  | 3.142  | 2.915  | 2.765  | 2.520  | 3.123  | 3.374  | 3.527  | 4.227  | 22025     | NR2C1    | NM_011629_10_+1 |
| Nr2c2    | 4.081  | 3.831  | 4.664  | 3.845  | 5.067  | 4.520  | 4.910  | 4.454  | 5.553  | 5.335  | 22026     | NR2C2    | NM_011630_6_+1  |
| Hsp90b1  | 10.172 | 10.333 | 9.599  | 9.988  | 8.167  | 8.648  | 8.589  | 9.798  | 8.845  | 9.575  | 22027     | HSP90B1  | NM_011631_10_-1 |
| Traf3    | 3.930  | 3.946  | 4.476  | 4.437  | 5.728  | 5.469  | 5.208  | 5.021  | 5.034  | 5.354  | 22031     | TRAF3    | NM_011632_12_+1 |
| Traf5    | 3.323  | 3.467  | 4.363  | 4.448  | 4.307  | 4.378  | 4.398  | 4.536  | 4.200  | 4.233  | 22033     | TRAF5    | NM_011633_1_-1  |
| Traip    | 1.128  | 0.714  | 2.345  | 2.428  | 2.366  | 2.083  | 1.962  | 1.620  | 0.637  | -0.639 | 22036     | TRAIIP   | NM_011634_9_+1  |
| Plscr1   | 2.912  | 3.232  | 5.130  | 5.242  | 4.865  | 4.875  | 4.385  | 4.232  | 3.502  | 3.598  | 22038     | PLSCR1   | NM_011636_9_+1  |
| Trex1    | 4.415  | 3.647  | 2.287  | 1.939  | 2.684  | 1.540  | 1.878  | 2.109  | 2.635  | 1.638  | 22040     | TREX1    | NM_011637_9_-1  |
| Tfrc     | 7.598  | 7.688  | 4.229  | 5.138  | 6.556  | 8.228  | 5.755  | 6.112  | 2.564  | 3.381  | 22042     | TFRC     | NM_011638_16_+1 |
| Trip6    | 2.454  | 1.841  | 3.548  | 3.075  | 1.737  | 1.440  | 2.194  | 1.796  | 2.953  | 2.247  | 22051     | TRIP6    | NM_011639_5_-1  |
| Trp53    | 6.876  | 7.042  | 6.911  | 7.066  | 6.899  | 6.860  | 6.706  | 6.729  | 6.152  | 5.756  | 22059     | TP53     | NM_011640_11_+1 |
| Trp63    | -4.981 | -4.981 | -4.974 | -4.974 | -4.164 | -1.972 | -4.907 | -4.958 | -4.981 | -4.981 | 22061     | TP63     | NM_011641_16_+1 |
| Trpc1    | 0.031  | 0.578  | -4.378 | -3.376 | -3.494 | -3.685 | -4.964 | -3.529 | -2.746 | -3.527 | 22063     | TRPC1    | NM_011643_9_-1  |
| Xntrpc   | -4.517 | -4.459 | -4.242 | -4.648 | -1.916 | -3.745 | -4.028 | -4.888 | -3.582 | -3.377 | 102443351 | NA       | NM_011644_7_+1  |
| Try4     | -1.043 | -1.092 | -3.621 | -4.685 | -4.699 | -4.746 | -2.941 | -3.003 | -4.981 | -2.516 | 22074     | PRSS3    | NM_011646_6_+1  |
| Tsc2     | 0.155  | -2.252 | -3.822 | -4.102 | -3.282 | -4.206 | -3.637 | -4.320 | -4.140 | -1.564 | 22084     | TSC2     | NM_011647_17_-1 |
| Tsn      | 6.971  | 7.277  | 6.489  | 6.881  | 6.886  | 7.028  | 6.694  | 6.877  | 6.107  | 6.201  | 22099     | TSN      | NM_011650_1_-1  |
| Ttn      | -2.842 | -4.981 | -3.437 | -3.690 | -1.700 | -2.810 | -4.317 | -4.946 | -4.981 | -4.981 | 22138     | TTN      | NM_011652_2_-1  |
| Tuba1a   | 7.631  | 7.757  | 7.742  | 7.833  | 7.343  | 7.377  | 7.292  | 7.380  | 7.166  | 6.929  | 22142     | TUBA1A   | NM_011653_15_-1 |
| Tuba1b   | 8.517  | 8.504  | 8.719  | 9.034  | 9.417  | 9.143  | 9.039  | 8.956  | 7.802  | 7.365  | 22143     | TUBA1B   | NM_011654_15_-1 |
| Tubb5    | 6.632  | 6.452  | 7.194  | 7.298  | 7.980  | 7.685  | 7.559  | 6.891  | 5.278  | 5.147  | 22154     | TUBB5    | NM_011655_17_-1 |
| Tuft1    | 0.360  | 0.686  | 2.471  | 2.700  | 1.922  | 2.320  | 0.740  | 1.874  | -0.588 | 0.338  | 22156     | TUFT1    | NM_011656_3_-1  |
| Tulp3    | 0.967  | 3.923  | 0.966  | 0.607  | -4.162 | -2.455 | -1.858 | -2.884 | -4.190 | -2.538 | 22158     | TULP3    | NM_011657_6_-1  |
| Twist1   | -4.981 | -4.981 | -4.930 | -4.930 | -3.026 | -2.189 | -4.963 | -4.635 | -4.981 | -4.981 | 22160     | TWIST1   | NM_011658_12_+1 |
| Tnfrsf4  | 1.957  | 0.685  | 5.479  | 5.944  | 4.345  | 4.149  | 3.078  | 1.911  | -1.314 | -1.346 | 22163     | TNFRSF4  | NM_011659_4_+1  |
| Txn1     | 8.530  | 8.097  | 9.324  | 9.530  | 7.326  | 7.333  | 7.902  | 7.970  | 7.375  | 7.309  | 22166     | TXN1     | NM_011660_4_-1  |
| Tyr      | -0.170 | -0.534 | 1.458  | 0.951  | 0.056  | -0.154 | -0.003 | -0.696 | -0.598 | -1.534 | 22173     | TYR      | NM_011661_7_-1  |
| Tyrobp   | 12.265 | 12.948 | 9.458  | 9.106  | 10.509 | 10.234 | 11.138 | 10.866 | 11.498 | 10.979 | 22177     | TYROBP   | NM_011662_7_+1  |
| Zsrr1    | 2.840  | 4.305  | 1.611  | 3.597  | 2.003  | 4.676  | 1.959  | 3.269  | 2.085  | 2.849  | 22183     | NA       | NM_011663_11_+1 |
| Ubb      | 13.179 | 11.142 | 11.996 | 10.565 | 12.235 | 10.583 | 11.916 | 10.371 | 11.436 | 9.526  | 22187     | NA       | NM_011664_11_+1 |

|          |        |        |        |        |        |        |        |        |        |        |        |         |                 |
|----------|--------|--------|--------|--------|--------|--------|--------|--------|--------|--------|--------|---------|-----------------|
| Ube2i    | 6.550  | 6.916  | 6.494  | 6.588  | 6.107  | 6.612  | 6.119  | 6.289  | 5.972  | 6.301  | 22196  | UBE2I   | NM_011665_17_-1 |
| Uba3     | 4.608  | 4.846  | 4.600  | 4.578  | 4.740  | 4.549  | 4.522  | 4.475  | 4.379  | 4.145  | 22200  | UBA3    | NM_011666_6_-1  |
| Uba1y    | -4.981 | -2.895 | -4.157 | -4.837 | -4.023 | -4.684 | -4.802 | -4.333 | -4.394 | -3.853 | 22202  | NA      | NM_011667_Y_+1  |
| Ube3a    | 4.685  | 4.805  | 4.917  | 4.945  | 4.773  | 4.866  | 4.571  | 5.050  | 4.303  | 4.627  | 22215  | UBE3A   | NM_011668_7_+1  |
| Usp12    | 4.580  | 4.352  | 7.339  | 7.068  | 6.920  | 6.752  | 6.895  | 6.804  | 6.960  | 7.393  | 22217  | USP12   | NM_011669_5_-1  |
| Uchl1    | -3.349 | -4.981 | -4.941 | -4.325 | -2.639 | -4.884 | -4.978 | -3.936 | -4.981 | -4.981 | 22223  | UCHL1   | NM_011670_5_+1  |
| Ucp2     | 10.526 | 10.538 | 11.596 | 11.685 | 10.556 | 10.768 | 10.521 | 11.095 | 11.846 | 11.827 | 22228  | UCP2    | NM_011671_7_+1  |
| Ufd1l    | 6.209  | 6.155  | 5.892  | 6.031  | 5.606  | 5.405  | 5.636  | 5.578  | 5.661  | 5.233  | 22230  | UFD1L   | NM_011672_16_+1 |
| Ugcg     | 6.012  | 5.813  | 5.072  | 4.938  | 5.207  | 5.170  | 5.100  | 5.186  | 5.753  | 5.072  | 22234  | UGCG    | NM_011673_4_+1  |
| Ugt8a    | -4.981 | -4.981 | -4.981 | -4.981 | -4.903 | -4.826 | -4.950 | -3.426 | -3.925 | -4.981 | 22239  | UGT8    | NM_011674_3_-1  |
| Uck1     | 5.459  | 5.437  | 5.271  | 5.276  | 5.384  | 5.363  | 5.246  | 5.385  | 4.910  | 4.928  | 22245  | UCK1    | NM_011675_2_-1  |
| Unc119   | 5.520  | 5.189  | 7.249  | 7.399  | 6.271  | 5.918  | 5.931  | 5.696  | 6.447  | 5.246  | 22248  | UNC119  | NM_011676_11_+1 |
| Ung      | 1.208  | 0.754  | -1.063 | -0.444 | -0.042 | -0.926 | -0.173 | -0.961 | -4.981 | -2.705 | 22256  | UNG     | NM_011677_5_+1  |
| Usp4     | 5.499  | 5.716  | 6.582  | 6.501  | 6.415  | 6.305  | 6.363  | 6.502  | 7.294  | 7.416  | 22258  | USP4    | NM_011678_9_+1  |
| Usf2     | 4.817  | 4.952  | 4.107  | 4.120  | 4.631  | 4.639  | 4.886  | 4.425  | 4.535  | 4.229  | 22282  | USF2    | NM_011680_7_-1  |
| Scgb1a1  | -4.981 | -4.981 | -4.969 | -4.969 | -4.977 | -4.977 | -3.630 | -4.185 | -1.002 | -1.175 | 22287  | SCGB1A1 | NM_011681_19_-1 |
| Utrn     | 5.015  | 5.183  | 5.000  | 4.545  | 5.814  | 5.481  | 5.405  | 5.069  | 5.592  | 5.079  | 22288  | UTRN    | NM_011682_10_-1 |
| Vars     | 3.853  | 3.767  | 5.008  | 4.906  | 4.748  | 4.620  | 5.061  | 5.220  | 6.611  | 5.963  | 22321  | VARS    | NM_011690_17_+1 |
| Vav1     | 7.126  | 7.303  | 7.518  | 7.791  | 7.111  | 6.935  | 7.328  | 7.606  | 8.239  | 8.346  | 22324  | VAV1    | NM_011691_17_+1 |
| Vbp1     | 7.241  | 7.496  | 6.756  | 6.824  | 6.729  | 6.686  | 6.885  | 6.759  | 6.149  | 6.697  | 22327  | VBP1    | NM_011692_X_+1  |
| Vcam1    | 5.677  | 3.501  | 6.309  | 7.053  | 6.497  | 5.846  | 6.312  | 7.353  | 4.069  | 3.512  | 22329  | VCAM1   | NM_011693_3_-1  |
| Vdac1    | 6.912  | 6.894  | 6.322  | 6.379  | 6.381  | 6.366  | 5.928  | 6.199  | 5.902  | 6.072  | 22333  | VDAC1   | NM_011694_11_+1 |
| Vdac2    | 7.932  | 7.858  | 8.348  | 8.375  | 7.902  | 7.941  | 7.622  | 7.702  | 7.425  | 7.315  | 22334  | VDAC2   | NM_011695_14_+1 |
| Vdac3    | 7.508  | 7.464  | 7.488  | 7.536  | 7.433  | 7.267  | 7.419  | 7.443  | 7.321  | 7.395  | 22335  | VDAC3   | NM_011696_8_-1  |
| Vegfb    | 3.404  | 3.361  | 2.295  | 2.263  | 1.763  | 1.312  | 1.109  | 1.343  | -1.760 | -1.321 | 22340  | VEGFB   | NM_011697_19_-1 |
| Lin7c    | 5.589  | 5.715  | 6.000  | 5.923  | 5.918  | 5.763  | 6.089  | 5.896  | 6.254  | 6.550  | 22343  | LIN7C   | NM_011699_2_+1  |
| Vill     | -2.346 | -4.981 | 0.570  | -4.938 | -0.185 | -4.960 | -0.044 | -4.843 | 1.719  | -2.795 | 22351  | VILL    | NM_011700_9_+1  |
| Vim      | 6.008  | 5.954  | 7.437  | 7.867  | 7.133  | 7.112  | 8.354  | 9.001  | 10.122 | 10.300 | 22352  | VIM     | NM_011701_2_+1  |
| Vipr1    | -0.554 | -1.653 | 1.138  | 0.878  | 2.168  | 0.943  | 0.723  | 0.623  | -1.909 | -4.981 | 22354  | VIPR1   | NM_011703_9_+1  |
| Vrk1     | 1.593  | 2.632  | 2.807  | 2.168  | 3.096  | 2.302  | 2.639  | 2.849  | 1.884  | 0.321  | 22367  | VRK1    | NM_011705_12_+1 |
| Trpv2    | 5.717  | 5.941  | 6.813  | 6.470  | 6.258  | 6.540  | 6.203  | 6.524  | 6.726  | 7.603  | 22368  | TRPV2   | NM_011706_11_+1 |
| Vtn      | -4.981 | -4.981 | -3.968 | -2.509 | -4.981 | -4.981 | -4.981 | -4.981 | -4.981 | -4.981 | 22370  | VTN     | NM_011707_11_+1 |
| Vwf      | -0.877 | -2.124 | 4.885  | 4.485  | 2.082  | 3.089  | 3.186  | 3.991  | 1.844  | 2.662  | 22371  | VWF     | NM_011708_6_+1  |
| Wars     | 2.021  | 3.046  | 0.946  | 2.410  | 0.312  | 1.790  | 0.604  | 3.028  | 2.911  | 3.584  | 22375  | WARS    | NM_011710_12_-1 |
| Fmn13    | 0.960  | 1.106  | 0.592  | 0.352  | 3.603  | 3.677  | 2.759  | 3.978  | 3.551  | 2.363  | 22379  | FMN13   | NM_011711_15_-1 |
| Wbp5     | 7.049  | 6.861  | 4.789  | 5.164  | 5.395  | 5.557  | 5.340  | 5.463  | 3.354  | 4.080  | 22381  | TCEAL9  | NM_011712_X_+1  |
| Baz1b    | 5.236  | 5.329  | 5.653  | 5.749  | 6.167  | 6.099  | 5.818  | 5.656  | 5.718  | 5.652  | 22385  | BAZ1B   | NM_011714_5_+1  |
| Wdr1     | 7.518  | 7.616  | 9.165  | 9.331  | 8.848  | 8.766  | 8.535  | 8.723  | 9.186  | 9.319  | 22388  | WDR1    | NM_011715_5_-1  |
| Wfs1     | 5.250  | 5.202  | 1.920  | 1.776  | 1.845  | 1.794  | 2.315  | 1.871  | 3.880  | 3.752  | 22393  | WFS1    | NM_011716_5_-1  |
| Wiz      | -1.153 | -0.295 | -2.687 | -2.533 | -1.266 | -1.085 | -1.967 | -1.616 | -0.791 | 0.007  | 22404  | WIZ     | NM_011717_17_-1 |
| Wnt10b   | 0.657  | 0.230  | -1.346 | -2.739 | -0.791 | -0.835 | -2.836 | -3.914 | -4.981 | -4.981 | 22410  | WNT10B  | NM_011718_15_-1 |
| Wnt9b    | -4.981 | -4.981 | -4.955 | -4.324 | -4.475 | -4.897 | -4.974 | -4.978 | -4.981 | -4.981 | 22412  | WNT9B   | NM_011719_11_-1 |
| Wnt8b    | -4.981 | -4.981 | -0.396 | -4.960 | -2.909 | -4.969 | -4.648 | -4.981 | -4.981 | -4.981 | 22423  | WNT8B   | NM_011720_19_+1 |
| Wrn      | 4.938  | 3.376  | 4.409  | 4.053  | 4.802  | 4.114  | 4.356  | 3.971  | 4.755  | 4.290  | 22427  | WRN     | NM_011721_8_-1  |
| Dctn6    | 6.848  | 7.188  | 5.276  | 5.601  | 5.164  | 5.558  | 5.375  | 5.167  | 4.809  | 5.011  | 22428  | DCTN6   | NM_011722_8_-1  |
| Xdh      | -1.187 | -2.160 | 2.511  | 2.913  | 1.670  | 1.673  | 6.160  | 5.709  | 9.448  | 8.697  | 22436  | XDH     | NM_011723_17_-1 |
| Xirp1    | -4.981 | -4.981 | -4.981 | -4.981 | -4.981 | -4.981 | -3.310 | -4.242 | -0.806 | -4.981 | 22437  | XIRP1   | NM_011724_9_-1  |
| Xlr      | 2.791  | 2.939  | 5.052  | 6.058  | 2.806  | 4.170  | 2.615  | 3.429  | 0.495  | 2.125  | 22441  | NA      | NM_011725_X_-1  |
| Xlr3c    | -4.981 | -0.018 | -3.735 | -0.464 | -3.934 | -0.992 | -3.264 | -1.318 | -3.539 | -0.679 | 22446  | NA      | NM_011727_X_-1  |
| Xpa      | 5.104  | 4.860  | 4.581  | 4.373  | 4.486  | 4.365  | 4.290  | 4.041  | 3.937  | 3.757  | 22590  | XPA     | NM_011728_4_-1  |
| Erc5     | 4.750  | 4.445  | 4.101  | 3.537  | 4.324  | 4.148  | 4.141  | 3.763  | 4.158  | 4.189  | 22592  | ERCC5   | NM_011729_1_+1  |
| Slc6a20b | -4.981 | -4.981 | -2.044 | -4.200 | -2.319 | -4.114 | -3.873 | -4.584 | -4.981 | -4.045 | 22599  | NA      | NM_011731_9_-1  |
| Ybx1     | 8.474  | 8.504  | 8.603  | 8.928  | 8.665  | 8.621  | 8.338  | 8.471  | 8.061  | 8.097  | 22608  | YBX1    | NM_011732_4_-1  |
| Ybx3     | 7.802  | 7.115  | 5.943  | 6.060  | 5.578  | 5.691  | 6.486  | 6.882  | 6.357  | 6.546  | 56449  | YBX3    | NM_011733_6_-1  |
| Siae     | 4.636  | 4.667  | 3.788  | 3.501  | 3.864  | 3.974  | 3.888  | 3.574  | 3.900  | 4.104  | 22619  | SIAE    | NM_011734_9_+1  |
| Map3k19  | 3.389  | 3.621  | -1.000 | -0.422 | -0.918 | -2.482 | -4.242 | -2.197 | -2.834 | -1.556 | 22625  | MAP3K19 | NM_011737_1_-1  |
| Ywhah    | 7.312  | 7.540  | 8.556  | 8.859  | 8.977  | 9.081  | 8.351  | 8.535  | 7.527  | 7.831  | 22629  | YWHAH   | NM_011738_5_+1  |
| Ywhaq    | 8.761  | 8.385  | 8.641  | 8.560  | 8.347  | 8.206  | 8.168  | 8.302  | 7.494  | 7.844  | 22630  | YWHAQ   | NM_011739_12_-1 |
| Ywhaz    | 6.894  | 7.073  | 7.736  | 7.933  | 7.131  | 7.224  | 7.470  | 7.913  | 8.296  | 8.351  | 22631  | YWHAZ   | NM_011740_15_-1 |
| Zfp1     | 2.007  | 1.730  | 1.349  | 0.935  | 0.745  | -0.227 | -0.075 | 0.750  | 0.881  | -0.713 | 22640  | ZFP1    | NM_011742_8_+1  |
| Zfp106   | 5.892  | 5.060  | 6.788  | 6.583  | 6.626  | 6.011  | 6.681  | 6.323  | 7.224  | 7.167  | 20402  | ZNF106  | NM_011743_2_-1  |
| Mkrn3    | 0.636  | -1.569 | -2.400 | -2.360 | -3.783 | -1.357 | -4.298 | -3.625 | -4.981 | -4.981 | 22652  | MKRN3   | NM_011746_7_-1  |
| Zfp13    | -4.981 | -3.315 | -2.926 | -2.968 | -4.795 | -4.730 | -4.975 | -4.288 | -3.373 | -4.981 | 22654  | ZNF205  | NM_011747_17_-1 |
| Zfp14    | -2.643 | 2.008  | -2.391 | 1.206  | -3.934 | 1.167  | -2.961 | 1.048  | -3.230 | 1.939  | 243906 | ZFP14   | NM_011748_7_-1  |
| Zfp148   | 5.609  | 5.647  | 5.481  | 5.605  | 5.803  | 5.893  | 5.798  | 5.616  | 5.513  | 5.819  | 22661  | ZNF148  | NM_011749_16_+1 |
| Sf1      | 6.069  | 6.179  | 6.359  | 6.422  | 6.544  | 6.571  | 6.536  | 6.419  | 6.473  | 6.368  | 22668  | NA      | NM_011750_19_+1 |
| Zfp207   | 1.642  | 3.215  | 3.575  | 2.681  | 2.997  | 3.034  | 2.650  | 1.819  | 2.058  | 3.139  | 22680  | ZNF207  | NM_011751_11_+1 |
| Zpr1     | 6.052  | 6.046  | 6.031  | 6.028  | 5.918  | 6.066  | 6.030  | 6.173  | 5.975  | 5.721  | 22687  | ZPR1    | NM_011752_9_+1  |
| Zfp26    | 4.078  | 3.652  | 4.191  | 3.854  | 4.266  | 4.144  | 4.147  | 4.053  | 4.437  | 4.819  | 22688  | ZNF778  | NM_011753_9_-1  |
| Zfp27    | 1.484  | 1.361  | -0.549 | -3.125 | 0.160  | 0.139  | 0.728  | 0.483  | 0.760  | -0.128 | 22689  | ZNF585A | NM_011754_7_-1  |
| Zfp35    | 4.762  | 4.761  | 4.465  | 4.194  | 4.913  | 4.828  | 4.738  | 4.696  | 4.823  | 4.711  | 22694  | NA      | NM_011755_18_+1 |
| Zfp36    | 9.922  | 10.086 | 10.092 | 10.133 | 11.666 | 11.694 | 11.143 | 11.159 | 11.138 | 11.455 | 22695  | ZFP36   | NM_011756_7_-1  |
| Zscan21  | 3.142  | -0.857 | 2.449  | -0.624 | 2.702  | 0.300  | 2.493  | -0.960 | 2.799  | 0.217  | 22697  | ZSCAN21 | NM_011757_5_+1  |
| Zfp39    | 2.986  | 2.838  | 2.529  | 2.175  | 2.922  | 2.634  | 2.497  | 1.800  | 3.207  | 2.715  | 22698  | ZNF717  | NM_011758_11_-1 |

|         |        |        |        |        |        |        |        |        |        |        |        |         |                 |
|---------|--------|--------|--------|--------|--------|--------|--------|--------|--------|--------|--------|---------|-----------------|
| Zfp41   | -4.135 | -3.949 | -3.130 | -0.455 | -2.339 | -2.498 | -3.041 | -4.841 | -4.419 | -1.423 | 22701  | ZFP41   | NM_011759_15_+1 |
| Zfp54   | 3.565  | 4.206  | 2.387  | 2.340  | 2.623  | 2.680  | 2.523  | 2.572  | 1.917  | 2.831  | 22712  | NA      | NM_011760_17_+1 |
| Zfp59   | 2.107  | 1.462  | 1.976  | 1.701  | 2.036  | 2.271  | 2.379  | 2.194  | 2.545  | 2.685  | 22717  | NA      | NM_011762_7_+1  |
| Zfp9    | -3.013 | -1.720 | -2.238 | -1.969 | -1.778 | -1.565 | -1.009 | -0.820 | -2.279 | -2.558 | 22750  | ZNF25   | NM_011763_6_-1  |
| Zfp90   | 4.140  | 4.359  | 3.379  | 2.817  | 3.641  | 3.651  | 3.685  | 3.649  | 3.357  | 3.590  | 22751  | ZFP90   | NM_011764_8_+1  |
| Zfp97   | 2.897  | 2.524  | 3.194  | 3.030  | 3.489  | 3.330  | 3.529  | 2.712  | 3.138  | 3.393  | 22759  | NA      | NM_011765_17_+1 |
| Zfr     | 6.326  | 6.021  | 6.356  | 5.613  | 6.651  | 5.785  | 6.145  | 5.083  | 5.974  | 4.361  | 22763  | ZFR     | NM_011767_15_+1 |
| Zfx     | 2.203  | 3.693  | 3.717  | 3.511  | 3.945  | 3.274  | 3.584  | 2.988  | 3.377  | 3.155  | 22764  | ZFX     | NM_011768_X_-1  |
| Ikzf2   | 3.248  | 3.315  | 0.033  | 0.229  | -1.201 | -0.480 | 0.983  | -0.127 | -0.397 | -2.298 | 22779  | IKZF2   | NM_011770_1_-1  |
| Ikzf3   | 3.545  | 4.306  | -0.901 | 1.247  | 2.131  | 3.564  | 3.056  | 4.453  | 2.568  | 1.864  | 22780  | IKZF3   | NM_011771_11_-1 |
| Ikzf4   | -4.981 | -4.981 | -2.061 | -1.901 | 0.387  | 0.203  | -2.416 | -1.227 | -4.981 | -4.981 | 22781  | IKZF4   | NM_011772_10_-1 |
| Slc30a4 | 0.966  | 3.560  | 3.245  | 2.521  | 3.078  | 2.567  | 2.507  | 2.337  | -3.883 | -4.448 | 22785  | SLC30A4 | NM_011774_2_-1  |
| Zyx     | 7.714  | 8.291  | 7.820  | 7.628  | 7.592  | 7.501  | 8.178  | 8.338  | 9.583  | 9.253  | 22793  | ZYX     | NM_011777_6_+1  |
| Coro1b  | 8.467  | 8.557  | 9.487  | 9.683  | 9.100  | 9.079  | 9.237  | 9.395  | 9.596  | 9.627  | 23789  | CORO1B  | NM_011778_19_+1 |
| Coro1c  | 5.319  | 5.584  | 6.907  | 7.038  | 7.181  | 7.046  | 7.197  | 7.047  | 8.094  | 7.894  | 23790  | CORO1C  | NM_011779_5_-1  |
| Adam23  | 0.224  | 0.342  | 6.722  | 7.300  | 7.587  | 8.221  | 5.388  | 5.484  | -1.806 | -4.981 | 23792  | ADAM23  | NM_011780_1_+1  |
| Aplnr   | -1.868 | -1.149 | -4.945 | -3.782 | -3.730 | -3.643 | -2.752 | -2.454 | 2.783  | 0.350  | 23796  | APLNR   | NM_011784_2_+1  |
| Akt3    | 2.698  | 3.157  | 3.644  | 3.076  | 3.892  | 3.834  | 4.135  | 3.363  | 3.424  | 3.157  | 23797  | AKT3    | NM_011785_1_-1  |
| Aloxe3  | -3.349 | -1.306 | -2.138 | -0.887 | -2.063 | 0.314  | -2.628 | -0.501 | -0.123 | -0.768 | 23801  | ALOXE3  | NM_011786_11_+1 |
| Amfr    | 7.230  | 7.224  | 7.081  | 6.999  | 6.919  | 7.101  | 6.661  | 7.033  | 7.352  | 7.514  | 23802  | AMFR    | NM_011787_8_-1  |
| Apc2    | -3.843 | -1.459 | -1.298 | -0.521 | -2.557 | -1.212 | -2.825 | -2.444 | -0.298 | -1.509 | 23805  | APC2    | NM_011789_10_+1 |
| Arih2   | 4.962  | 5.189  | 6.118  | 6.054  | 5.719  | 5.863  | 5.739  | 5.775  | 6.204  | 5.960  | 23807  | ARIH2   | NM_011790_9_-1  |
| Ash2l   | 5.517  | 5.769  | 5.175  | 5.255  | 5.464  | 5.371  | 5.345  | 5.738  | 5.465  | 5.739  | 23808  | ASH2L   | NM_011791_8_-1  |
| Bace1   | -3.189 | -2.646 | -0.768 | -4.140 | -0.130 | 0.863  | 0.018  | -0.405 | 2.507  | 3.008  | 23821  | BACE1   | NM_011792_9_+1  |
| Banf1   | 6.542  | 6.217  | 6.196  | 6.012  | 6.268  | 6.078  | 6.403  | 5.953  | 4.941  | 4.533  | 23825  | BANF1   | NM_011793_19_-1 |
| Bpnt1   | 4.636  | 4.412  | 4.608  | 4.295  | 4.194  | 3.745  | 3.900  | 3.856  | 4.492  | 4.065  | 23827  | BPNT1   | NM_011794_1_+1  |
| Capn10  | 2.691  | 2.877  | 2.818  | 2.358  | 2.031  | 2.406  | 1.929  | 2.466  | 3.361  | 3.281  | 23830  | CAPN10  | NM_011796_1_+1  |
| Xcr1    | 1.431  | 0.588  | 9.705  | 10.059 | 2.169  | 2.977  | 2.865  | 5.501  | 0.121  | 0.478  | 23832  | XCR1    | NM_011798_9_-1  |
| Cdc6    | -2.976 | -2.479 | -4.488 | -4.126 | -4.598 | -4.745 | -4.541 | -3.042 | -3.860 | -4.375 | 23834  | CDC6    | NM_011799_11_+1 |
| Cfdp1   | 6.629  | 6.604  | 6.261  | 6.427  | 6.092  | 6.346  | 6.004  | 6.190  | 5.009  | 5.220  | 23837  | CFDP1   | NM_011801_8_-1  |
| Clpx    | 5.203  | 5.411  | 4.782  | 4.990  | 4.683  | 5.036  | 4.776  | 5.069  | 5.039  | 5.089  | 270166 | CLPX    | NM_011802_9_+1  |
| Klf6    | 8.829  | 9.088  | 8.759  | 8.860  | 9.200  | 9.399  | 8.548  | 8.615  | 8.576  | 8.712  | 23849  | KLF6    | NM_011803_13_+1 |
| Creg1   | 8.305  | 8.220  | 9.167  | 9.446  | 7.485  | 7.556  | 8.117  | 8.409  | 8.516  | 8.736  | 433375 | CREG1   | NM_011804_1_+1  |
| Dido1   | 3.364  | 2.889  | 3.379  | 3.327  | 3.357  | 3.034  | 3.268  | 3.080  | 3.032  | 3.398  | 23856  | DIDO1   | NM_011805_2_-1  |
| Dmtf1   | 3.585  | 3.056  | 3.042  | 3.723  | 4.103  | 3.871  | 3.522  | 4.233  | 4.178  | 4.734  | 23857  | DMTF1   | NM_011806_5_-1  |
| Dlg2    | 1.350  | 3.791  | 0.772  | -2.040 | 2.334  | 1.888  | -0.341 | -1.546 | -1.983 | -3.386 | 23859  | DLG2    | NM_011807_7_+1  |
| Ets1    | 6.187  | 6.504  | 1.540  | 2.995  | 3.176  | 4.861  | 3.849  | 6.048  | 3.076  | 3.098  | 23871  | ETS1    | NM_011808_9_+1  |
| Ets2    | 1.073  | 0.329  | 0.967  | 1.997  | 1.341  | 2.005  | 3.435  | 4.052  | 4.618  | 4.766  | 23872  | ETS2    | NM_011809_16_+1 |
| Faim    | 6.185  | 6.351  | 5.397  | 5.319  | 5.390  | 5.446  | 5.680  | 5.651  | 5.481  | 5.606  | 23873  | FAIM    | NM_011810_9_+1  |
| Farsb   | 5.750  | 5.962  | 6.095  | 6.181  | 5.732  | 5.761  | 5.713  | 5.760  | 5.143  | 4.988  | 23874  | FARSB   | NM_011811_1_-1  |
| Fbln5   | -4.981 | -1.347 | -2.565 | -4.962 | -1.395 | -1.717 | -2.238 | -2.680 | -4.981 | -2.182 | 23876  | FBLN5   | NM_011812_12_-1 |
| Fiz1    | -3.588 | -0.314 | 0.521  | -1.774 | 0.741  | 0.404  | -1.507 | -2.603 | -3.827 | -4.289 | 23877  | FIZ1    | NM_011813_7_-1  |
| Fxr2    | 4.280  | 4.111  | 5.180  | 4.834  | 5.488  | 5.148  | 5.040  | 4.741  | 5.163  | 5.014  | 23879  | FXR2    | NM_011814_11_+1 |
| Fyb     | 8.918  | 8.918  | 5.780  | 5.707  | 8.358  | 8.555  | 8.809  | 8.818  | 8.917  | 9.223  | 23880  | FYB     | NM_011815_15_+1 |
| G3bp2   | 3.230  | 2.609  | 3.704  | 4.293  | 3.463  | 3.860  | 3.792  | 3.592  | 4.137  | 4.315  | 23881  | G3BP2   | NM_011816_5_-1  |
| Gadd45g | 1.607  | 1.654  | 5.368  | 5.757  | 7.183  | 8.122  | 5.866  | 5.693  | 3.803  | 3.662  | 23882  | GADD45G | NM_011817_13_+1 |
| Gmcl1   | 4.561  | 5.115  | 5.034  | 5.341  | 4.823  | 5.137  | 4.756  | 4.974  | 4.408  | 4.979  | 23885  | GMCL1   | NM_011818_6_-1  |
| Gdf15   | 1.217  | -4.981 | 0.283  | 1.123  | 1.454  | 1.564  | 2.325  | 3.589  | -0.104 | -0.960 | 23886  | GDF15   | NM_011819_8_-1  |
| Ggt5    | 0.036  | -0.054 | 3.034  | 2.479  | 5.250  | 5.843  | 4.712  | 4.673  | 2.352  | 2.806  | 23887  | GGT5    | NM_011820_10_+1 |
| Gpc6    | -3.275 | -4.981 | -3.527 | -4.372 | -4.729 | -4.555 | -3.846 | -4.101 | -3.437 | -4.981 | 23888  | GPC6    | NM_011821_14_+1 |
| Pigq    | 4.936  | 4.892  | 4.857  | 5.103  | 5.102  | 5.469  | 4.997  | 5.246  | 5.362  | 5.343  | 14755  | PIGQ    | NM_011822_17_-1 |
| Gpr34   | 3.205  | 3.512  | 7.150  | 7.155  | 6.786  | 7.184  | 6.484  | 6.091  | 0.823  | 3.967  | 23890  | GPR34   | NM_011823_X_+1  |
| Hax1    | 6.499  | 6.725  | 6.150  | 6.534  | 6.501  | 6.928  | 6.307  | 6.630  | 5.456  | 5.866  | 23897  | HAX1    | NM_011826_3_-1  |
| Hcst    | 5.914  | 5.084  | 4.452  | 3.503  | 4.807  | 4.649  | 5.550  | 4.505  | 5.239  | 3.704  | 23900  | HCST    | NM_011827_7_-1  |
| Hs2st1  | 4.075  | 4.107  | 3.341  | 3.219  | 3.569  | 3.624  | 3.103  | 3.306  | 3.624  | 4.125  | 23908  | HS2ST1  | NM_011828_3_-1  |
| Impdh1  | 0.244  | 0.477  | 0.709  | 1.324  | 1.051  | 2.452  | 2.275  | 2.857  | 2.810  | 2.925  | 23917  | IMPDH1  | NM_011829_6_-1  |
| Impdh2  | 5.651  | 5.644  | 6.078  | 6.157  | 5.723  | 5.678  | 5.818  | 5.999  | 4.913  | 4.684  | 23918  | IMPDH2  | NM_011830_9_+1  |
| Insl5   | -4.981 | -4.981 | -4.596 | -3.004 | -4.424 | -4.976 | -4.981 | -4.981 | -4.981 | -4.981 | 23919  | INSL5   | NM_011831_4_-1  |
| Katna1  | 5.022  | 5.416  | 5.384  | 5.269  | 5.448  | 5.445  | 5.279  | 5.264  | 5.253  | 5.414  | 23924  | KATNA1  | NM_011835_10_+1 |
| Lynx1   | 5.926  | 4.210  | -0.291 | -0.875 | -1.628 | -3.465 | 0.118  | -0.235 | 1.552  | 0.344  | 23936  | LYNX1   | NM_011838_15_-1 |
| Mab21l2 | -2.147 | -1.230 | -2.298 | -1.825 | -1.928 | -1.954 | -2.614 | -3.992 | -4.981 | -3.233 | 23937  | MAB21L2 | NM_011839_3_-1  |
| Map2k5  | 4.831  | 4.813  | 4.561  | 4.839  | 4.678  | 4.657  | 4.244  | 4.657  | 4.532  | 5.073  | 23938  | MAP2K5  | NM_011840_9_-1  |
| Mapk7   | 3.153  | 2.501  | 4.176  | 3.342  | 4.737  | 3.785  | 4.259  | 3.352  | 5.192  | 3.767  | 23939  | MAPK7   | NM_011841_11_-1 |
| Mta2    | 6.408  | 6.512  | 7.154  | 7.173  | 7.994  | 7.923  | 7.304  | 7.376  | 7.645  | 7.555  | 23942  | MTA2    | NM_011842_19_+1 |
| Esyt1   | 5.016  | 5.327  | 6.041  | 6.161  | 5.417  | 5.472  | 6.194  | 6.773  | 8.401  | 8.341  | 23943  | ESYT1   | NM_011843_10_-1 |
| Mgll    | 1.041  | 2.986  | 2.686  | 4.126  | -0.390 | 2.007  | -1.459 | 1.972  | -0.279 | -2.784 | 23945  | MGLL    | NM_011844_6_+1  |
| Mid2    | -4.981 | -4.981 | -4.929 | -3.240 | 0.585  | 2.103  | -1.228 | -0.862 | -4.981 | -2.750 | 23947  | MID2    | NM_011845_X_+1  |
| Mmp17   | -4.981 | 2.038  | -2.027 | -3.307 | -1.455 | -2.129 | -3.896 | -3.969 | -2.305 | -2.064 | 23948  | MMP17   | NM_011846_5_+1  |
| Dnajb6  | 7.719  | 7.780  | 7.230  | 7.237  | 6.807  | 6.760  | 6.812  | 6.751  | 6.252  | 6.278  | 23950  | DNAJB6  | NM_011847_5_+1  |
| Nek3    | 1.484  | 2.300  | 1.247  | 1.914  | 1.435  | 0.263  | 0.662  | 0.976  | 1.532  | 2.237  | 23954  | NEK3    | NM_011848_8_-1  |
| Nek4    | -1.508 | 0.023  | 1.938  | 1.221  | 1.407  | 0.631  | -1.153 | 1.361  | 0.868  | 1.665  | 23955  | NEK4    | NM_011849_14_+1 |
| Nr0b2   | -2.647 | -4.981 | -4.627 | -3.440 | -4.976 | -4.887 | -4.933 | -3.399 | -3.738 | -3.233 | 23957  | NR0B2   | NM_011850_4_+1  |
| Nt5e    | -4.981 | -4.981 | -4.893 | -2.538 | -4.867 | -2.309 | -3.390 | -0.744 | -1.601 | -1.557 | 23959  | NT5E    | NM_011851_9_+1  |
| Oas1g   | -0.643 | -4.981 | -0.250 | -4.236 | 2.212  | -3.556 | 3.714  | -0.465 | 4.596  | 1.037  | 23960  | OAS1    | NM_011852_5_-1  |

|         |        |        |        |        |        |        |        |        |        |        |       |         |                 |
|---------|--------|--------|--------|--------|--------|--------|--------|--------|--------|--------|-------|---------|-----------------|
| Oasl2   | 5.320  | 4.053  | 2.487  | 1.222  | 5.909  | 4.338  | 6.247  | 5.446  | 7.755  | 6.624  | 23962 | NA      | NM_011854_5_+1  |
| Tenm3   | -2.995 | -1.300 | -4.981 | -4.981 | -4.981 | -4.981 | -4.973 | -4.978 | -4.981 | -4.981 | 23965 | TENM3   | NM_011857_8_-1  |
| Tenm4   | 2.982  | 3.864  | -3.518 | -0.634 | -1.066 | -0.678 | -1.801 | 1.238  | -4.981 | -2.795 | 23966 | TENM4   | NM_011858_7_+1  |
| Pacsin1 | 7.435  | 7.784  | 2.104  | 2.503  | -1.413 | -0.083 | -2.530 | 0.846  | -3.925 | -4.307 | 23969 | PACsin1 | NM_011861_17_+1 |
| Pacsin2 | 0.273  | -2.792 | 4.788  | 4.774  | 4.247  | 2.482  | 2.834  | 2.968  | 2.501  | 2.831  | 23970 | PACsin2 | NM_011862_15_-1 |
| Papss1  | 3.944  | 5.127  | 4.337  | 5.133  | 4.105  | 5.170  | 4.117  | 5.457  | 4.849  | 6.295  | 23971 | PAPSS1  | NM_011863_3_+1  |
| Papss2  | -3.374 | -3.243 | -3.404 | -4.838 | -4.708 | -4.962 | -4.569 | -4.013 | -4.682 | -4.721 | 23972 | PAPSS2  | NM_011864_19_+1 |
| Pcbp1   | 7.729  | 7.473  | 8.310  | 8.453  | 8.137  | 8.222  | 8.062  | 8.105  | 8.142  | 8.331  | 23983 | PCBP1   | NM_011865_6_-1  |
| Pde10a  | -0.805 | 0.915  | -4.709 | -4.959 | -3.774 | -3.996 | -1.951 | -3.850 | -1.849 | -4.981 | 23984 | PDE10A  | NM_011866_17_+1 |
| Slc26a4 | -4.981 | -4.981 | -3.391 | -1.440 | -4.978 | -4.978 | -4.970 | -4.982 | -4.981 | -4.981 | 23985 | SLC26A4 | NM_011867_12_-1 |
| Eci2    | 4.440  | 4.645  | 3.868  | 4.245  | 3.868  | 4.038  | 3.538  | 3.350  | 3.358  | 3.101  | 23986 | ECI2    | NM_011868_13_-1 |
| Med24   | 4.457  | 4.444  | 4.427  | 4.561  | 4.918  | 4.715  | 4.620  | 4.581  | 5.227  | 5.032  | 23989 | MED24   | NM_011869_11_-1 |
| Cib1    | 8.901  | 9.012  | 5.816  | 6.101  | 6.783  | 7.333  | 6.665  | 6.863  | 7.023  | 6.933  | 23991 | CIB1    | NM_011870_7_-1  |
| Prkra   | 4.689  | 5.157  | 5.881  | 6.006  | 3.988  | 4.070  | 4.106  | 4.379  | 3.732  | 4.356  | 23992 | PRKRA   | NM_011871_2_-1  |
| Dazap2  | 9.964  | 9.934  | 9.946  | 9.880  | 10.036 | 9.921  | 10.107 | 10.172 | 10.451 | 10.296 | 23994 | DAZAP2  | NM_011873_15_+1 |
| Psmc4   | 7.398  | 7.417  | 7.060  | 7.205  | 7.323  | 7.233  | 7.101  | 7.065  | 6.725  | 6.476  | 23996 | PSMC4   | NM_011874_7_-1  |
| Psm13   | 6.754  | 6.661  | 6.884  | 7.020  | 6.787  | 6.744  | 6.654  | 6.699  | 6.902  | 6.770  | 23997 | PSMD13  | NM_011875_7_+1  |
| Twf2    | 6.891  | 6.976  | 7.307  | 7.454  | 7.649  | 7.785  | 7.407  | 7.603  | 7.527  | 7.583  | 23999 | TWF2    | NM_011876_9_+1  |
| Ptpn21  | 1.364  | 0.928  | 0.762  | 1.167  | 0.374  | 1.168  | 0.899  | 0.965  | 0.614  | 1.093  | 24000 | PTPN21  | NM_011877_12_-1 |
| Tiam2   | -4.981 | -4.981 | -1.348 | -4.933 | -2.880 | -4.916 | 1.290  | -2.501 | 3.574  | -0.878 | 24001 | TIAM2   | NM_011878_17_+1 |
| Ik      | 7.292  | 7.212  | 7.453  | 7.520  | 7.078  | 6.925  | 6.979  | 6.861  | 6.505  | 6.521  | 24010 | IK      | NM_011879_18_+1 |
| Grk1    | 0.061  | -0.573 | -0.805 | -1.336 | -0.688 | -1.363 | -1.114 | -1.872 | -0.551 | -0.558 | 24013 | GRK1    | NM_011881_8_+1  |
| Rnasel  | 5.268  | 5.053  | 1.583  | 1.129  | 3.921  | 4.958  | 3.895  | 3.612  | 4.352  | 4.494  | 24014 | RNASEL  | NM_011882_1_+1  |
| Rnf13   | 5.681  | 5.497  | 4.120  | 4.256  | 4.729  | 5.047  | 4.010  | 4.107  | 3.938  | 3.831  | 24017 | RNF13   | NM_011883_3_+1  |
| Rngtt   | 4.785  | 4.780  | 4.958  | 5.204  | 4.715  | 4.822  | 4.986  | 4.890  | 4.320  | 4.527  | 24018 | RNGTT   | NM_011884_4_+1  |
| Mrps12  | 6.144  | 6.142  | 5.375  | 5.424  | 5.045  | 5.281  | 5.412  | 5.297  | 4.740  | 4.595  | 24030 | MRPS12  | NM_011885_7_-1  |
| Scamp3  | 5.923  | 6.096  | 4.521  | 4.977  | 5.034  | 5.077  | 5.026  | 4.996  | 4.375  | 4.420  | 24045 | SCAMP3  | NM_011886_3_+1  |
| Ccl19   | -0.573 | -0.012 | 1.049  | 1.281  | -1.147 | -1.239 | 0.169  | -1.134 | -3.925 | -1.987 | 24047 | CCL19   | NM_011888_4_-1  |
| Sept3   | -0.241 | 0.431  | 5.563  | 6.375  | 0.754  | 4.464  | 0.402  | 3.852  | -2.359 | -3.082 | 24050 | SEPT3   | NM_011889_15_+1 |
| Sgcb    | 6.130  | 6.404  | 3.911  | 3.991  | 2.968  | 2.905  | 2.409  | 2.637  | 3.457  | 2.922  | 24051 | SGCB    | NM_011890_5_-1  |
| Sh3bp2  | -0.191 | 1.036  | 0.874  | 0.442  | 1.151  | 1.302  | 3.212  | 2.427  | 3.972  | 3.455  | 24055 | SH3BP2  | NM_011893_5_+1  |
| Sh3bp5  | 0.881  | 0.476  | 0.498  | 2.274  | 2.163  | 3.062  | 3.512  | 4.979  | 6.758  | 6.543  | 24056 | SH3BP5  | NM_011894_14_-1 |
| Slc35a1 | 5.696  | 5.835  | 4.452  | 4.791  | 4.858  | 5.095  | 4.791  | 4.987  | 3.772  | 4.764  | 24060 | SLC35A1 | NM_011895_4_-1  |
| Spry1   | -1.101 | 1.072  | 0.400  | -0.263 | -2.141 | -1.386 | -3.645 | -3.585 | -0.940 | -2.131 | 24063 | SPRY1   | NM_011896_3_+1  |
| Spry2   | -1.045 | 0.143  | -4.039 | -1.861 | -0.667 | 0.455  | -0.598 | -1.232 | -1.488 | -2.572 | 24064 | SPRY2   | NM_011897_14_-1 |
| Spry4   | -1.812 | -1.251 | -2.083 | -1.162 | -2.917 | -1.986 | -1.893 | -2.246 | -4.981 | -1.184 | 24066 | SPRY4   | NM_011898_18_-1 |
| Srp54a  | 5.182  | 3.981  | 4.668  | 3.081  | 4.861  | 3.286  | 4.760  | 2.931  | 3.951  | 2.042  | 24067 | SRP54   | NM_011899_12_+1 |
| Mpdu1   | 6.097  | 5.769  | 5.744  | 5.882  | 5.579  | 5.541  | 5.341  | 5.293  | 5.668  | 5.478  | 24070 | MPDU1   | NM_011900_11_-1 |
| Tekt2   | -4.981 | -2.883 | -3.225 | -4.976 | -4.420 | -3.751 | -4.979 | -3.296 | -4.394 | -4.981 | 24084 | TEKT2   | NM_011902_4_-1  |
| Tll2    | -3.843 | -1.805 | -2.130 | -2.408 | -4.598 | -4.502 | -4.726 | -4.713 | -4.190 | -4.981 | 24087 | TLL2    | NM_011904_19_-1 |
| Tlr2    | 2.955  | 4.035  | 5.342  | 5.509  | 5.366  | 5.116  | 6.273  | 6.450  | 7.998  | 8.058  | 24088 | TLR2    | NM_011905_3_-1  |
| Tpra1   | 5.481  | 5.096  | 5.056  | 4.962  | 4.812  | 4.680  | 5.288  | 5.456  | 5.905  | 6.091  | 24100 | TPRA1   | NM_011906_6_+1  |
| Ubl3    | 7.567  | 8.273  | 7.189  | 7.238  | 7.573  | 8.076  | 8.100  | 8.217  | 8.483  | 8.732  | 24109 | UBL3    | NM_011908_5_-1  |
| Usp18   | 6.856  | 6.309  | 5.845  | 5.357  | 7.438  | 6.995  | 6.843  | 5.597  | 6.502  | 4.977  | 24110 | USP18   | NM_011909_6_+1  |
| Vax2    | -4.981 | -4.981 | -4.762 | -4.827 | -4.963 | -4.019 | -4.967 | -3.919 | -4.394 | -4.981 | 24113 | VAX2    | NM_011912_6_+1  |
| Best1   | 1.016  | 0.885  | 0.954  | 0.219  | 0.647  | 0.485  | 1.006  | 0.241  | 0.488  | 0.042  | 24115 | BEST1   | NM_011913_19_-1 |
| Nelfa   | 5.209  | 5.232  | 4.988  | 4.999  | 5.062  | 4.957  | 5.205  | 5.364  | 5.928  | 5.640  | 24116 | NELFA   | NM_011914_5_-1  |
| Xrn1    | 3.845  | 4.234  | 4.298  | 4.259  | 4.388  | 4.506  | 4.030  | 4.077  | 4.114  | 4.376  | 24127 | XRN1    | NM_011916_9_+1  |
| Xrn2    | 6.842  | 6.783  | 7.481  | 7.555  | 7.193  | 7.356  | 7.212  | 7.280  | 7.629  | 7.670  | 24128 | XRN2    | NM_011917_2_+1  |
| Ing1    | 2.900  | 3.681  | 3.755  | 3.319  | 4.273  | 4.399  | 4.184  | 3.812  | 4.280  | 4.079  | 26356 | ING1    | NM_011919_8_+1  |
| Abcg2   | 3.335  | 3.878  | 1.816  | 3.058  | 2.757  | 3.606  | 2.732  | 3.473  | 2.804  | 3.354  | 26357 | ABCG2   | NM_011920_6_+1  |
| Aldh1a7 | -4.981 | -4.981 | -4.915 | -1.486 | -4.587 | -1.246 | -4.516 | -0.640 | -3.242 | -4.981 | 26358 | NA      | NM_011921_19_-1 |
| Angptl2 | 1.003  | 0.109  | -2.700 | -3.618 | -4.483 | -3.443 | -0.125 | -0.204 | 2.829  | 2.578  | 26360 | ANGPTL2 | NM_011923_2_+1  |
| Adgre5  | 2.618  | 3.617  | 6.556  | 6.819  | 5.899  | 6.133  | 5.836  | 6.730  | 8.112  | 8.625  | 26364 | ADGRE5  | NM_011925_8_-1  |
| Ceacam1 | 4.254  | 2.868  | 0.050  | -3.290 | 1.039  | -2.290 | 2.944  | 2.271  | 4.928  | 3.912  | 26365 | CEACAM1 | NM_011926_7_-1  |
| Clcn6   | 1.475  | 2.178  | 1.412  | 1.903  | 0.133  | 0.858  | 0.325  | 1.530  | 2.108  | 2.813  | 26372 | CLCN6   | NM_011929_4_-1  |
| Clcn7   | 4.295  | 3.923  | 4.430  | 4.143  | 4.522  | 4.368  | 4.658  | 4.127  | 6.227  | 5.299  | 26373 | CLCN7   | NM_011930_17_+1 |
| Rfwd2   | 6.285  | 6.157  | 6.354  | 6.183  | 5.853  | 5.761  | 5.777  | 5.961  | 6.554  | 6.827  | 26374 | RFWD2   | NM_011931_1_+1  |
| Dapp1   | 6.768  | 6.626  | 7.372  | 7.191  | 8.057  | 7.780  | 7.709  | 7.426  | 7.057  | 7.035  | 26377 | DAPP1   | NM_011932_3_-1  |
| Decr2   | 4.632  | 4.984  | 4.920  | 5.186  | 4.106  | 4.344  | 4.185  | 4.179  | 3.362  | 3.927  | 26378 | DECR2   | NM_011933_17_-1 |
| Esrrg   | -4.981 | -4.981 | -3.251 | -2.891 | -1.609 | -2.015 | -3.353 | -2.016 | -4.981 | -4.981 | 26381 | ESRRG   | NM_011935_1_+1  |
| Fto     | 4.221  | 4.120  | 4.223  | 4.000  | 4.495  | 4.144  | 4.611  | 4.603  | 5.391  | 4.808  | 26383 | FTO     | NM_011936_8_+1  |
| Gnpda1  | 5.163  | 3.073  | 6.730  | 4.365  | 6.380  | 4.242  | 6.338  | 3.997  | 7.414  | 5.104  | 26384 | GNPDA1  | NM_011937_18_-1 |
| Grk6    | -4.929 | -4.756 | -2.108 | -2.889 | -3.975 | -3.970 | -2.171 | -1.125 | -4.282 | -1.280 | 26385 | GRK6    | NM_011938_13_+1 |
| Hsf4    | -4.981 | -4.981 | -4.720 | -4.946 | -4.931 | -4.973 | -4.540 | -4.966 | -4.691 | -4.523 | 26386 | HSF4    | NM_011939_8_+1  |
| Ifi202b | -4.981 | -0.248 | -4.875 | 0.687  | -4.874 | -1.641 | -3.171 | 2.845  | -3.537 | 4.853  | 26388 | NA      | NM_011940_1_-1  |
| Mapkbp1 | 2.434  | 2.525  | 2.952  | 2.314  | 2.950  | 2.752  | 2.559  | 2.346  | 2.763  | 2.944  | 26390 | MAPKBP1 | NM_011941_2_+1  |
| Lypla2  | 6.657  | 6.527  | 6.810  | 6.798  | 6.792  | 6.838  | 6.629  | 6.620  | 6.878  | 6.527  | 26394 | LYPLA2  | NM_011942_4_-1  |
| Map2k6  | 3.732  | 5.032  | 6.113  | 5.721  | 4.322  | 5.206  | 3.434  | 3.872  | 2.618  | 2.405  | 26399 | MAP2K6  | NM_011943_11_+1 |
| Map2k7  | 1.638  | 2.155  | 2.588  | 1.521  | 1.959  | 2.217  | 2.668  | 2.233  | 2.752  | 3.673  | 26400 | MAP2K7  | NM_011944_8_+1  |
| Map3k1  | 6.784  | 6.185  | 5.548  | 5.462  | 6.273  | 6.160  | 6.035  | 5.860  | 5.877  | 6.149  | 26401 | MAP3K1  | NM_011945_13_-1 |
| Map3k2  | 4.438  | 4.662  | 5.114  | 4.648  | 5.245  | 5.132  | 5.086  | 4.720  | 4.702  | 5.061  | 26405 | MAP3K2  | NM_011946_18_+1 |
| Map3k3  | 4.784  | 4.731  | 5.562  | 5.537  | 7.011  | 6.887  | 6.822  | 6.769  | 7.827  | 7.804  | 26406 | MAP3K3  | NM_011947_11_+1 |
| Map3k4  | 4.560  | 4.335  | 4.663  | 4.312  | 2.801  | 2.696  | 3.947  | 4.110  | 4.469  | 4.463  | 26407 | MAP3K4  | NM_011948_17_-1 |

|            |        |        |        |        |        |        |        |        |        |        |        |            |                 |
|------------|--------|--------|--------|--------|--------|--------|--------|--------|--------|--------|--------|------------|-----------------|
| Mapk1      | 6.811  | 6.967  | 6.575  | 6.785  | 6.564  | 6.673  | 6.787  | 7.023  | 6.886  | 7.248  | 26413  | MAPK1      | NM_011949_16_+1 |
| Mapk13     | -3.349 | -4.981 | 3.695  | 5.005  | 2.957  | 3.534  | 2.919  | 3.101  | 2.599  | 2.387  | 26415  | MAPK13     | NM_011950_17_+1 |
| Mapk14     | 3.165  | 3.009  | 5.369  | 4.920  | 5.614  | 6.364  | 5.935  | 5.816  | 7.159  | 7.170  | 26416  | MAPK14     | NM_011951_17_+1 |
| Mapk3      | 4.714  | 4.707  | 4.644  | 4.736  | 5.529  | 5.541  | 6.169  | 6.149  | 6.957  | 7.032  | 26417  | MAPK3      | NM_011952_7_+1  |
| Nubp1      | 6.740  | 6.556  | 6.756  | 6.802  | 7.049  | 6.949  | 6.716  | 6.500  | 6.357  | 6.114  | 26425  | NUBP1      | NM_011955_16_+1 |
| Nubp2      | 7.500  | 7.469  | 7.038  | 7.228  | 6.871  | 6.888  | 6.674  | 6.675  | 6.584  | 6.381  | 26426  | NUBP2      | NM_011956_17_-1 |
| Creb3l1    | 2.171  | 1.558  | -0.755 | -0.581 | -0.912 | -2.324 | 0.519  | -1.242 | 0.843  | -1.452 | 26427  | CREB3L1    | NM_011957_2_-1  |
| Orc4       | 5.875  | 6.274  | 5.708  | 5.602  | 5.629  | 5.579  | 5.551  | 5.079  | 4.837  | 5.155  | 26428  | ORC4       | NM_011958_2_-1  |
| Orc5       | 4.560  | 4.868  | 4.658  | 4.537  | 4.622  | 4.551  | 4.549  | 4.427  | 4.213  | 3.759  | 26429  | ORC5       | NM_011959_5_-1  |
| Parg       | 4.151  | 4.292  | 4.888  | 4.908  | 4.920  | 5.044  | 4.864  | 5.202  | 5.447  | 5.734  | 26430  | PARG       | NM_011960_14_+1 |
| Plod2      | 1.765  | 3.328  | -2.894 | -1.315 | -2.411 | -3.923 | -3.595 | -4.528 | -4.981 | -4.981 | 26432  | PLOD2      | NM_011961_9_+1  |
| Plod3      | 2.924  | 3.920  | 2.842  | 3.520  | 2.865  | 4.037  | 5.183  | 5.803  | 7.680  | 7.991  | 26433  | PLOD3      | NM_011962_5_+1  |
| Psma1      | 8.427  | 8.545  | 8.599  | 8.589  | 8.475  | 8.351  | 8.251  | 8.132  | 7.817  | 7.686  | 26440  | PSMA1      | NM_011965_7_-1  |
| Psma4      | 8.237  | 8.266  | 8.094  | 8.080  | 7.672  | 7.592  | 7.516  | 7.548  | 7.225  | 7.039  | 26441  | PSMA4      | NM_011966_9_+1  |
| Psma5      | 8.159  | 7.949  | 7.881  | 7.929  | 7.249  | 7.322  | 7.102  | 7.169  | 6.495  | 6.292  | 26442  | PSMA5      | NM_011967_3_+1  |
| Psma6      | 8.615  | 8.568  | 8.273  | 8.469  | 8.042  | 7.953  | 8.081  | 7.940  | 7.279  | 6.981  | 26443  | PSMA6      | NM_011968_12_+1 |
| Psma7      | 8.934  | 8.970  | 8.828  | 8.794  | 8.309  | 8.445  | 8.618  | 8.888  | 8.984  | 8.694  | 26444  | PSMA7      | NM_011969_2_-1  |
| Psmb2      | 9.045  | 8.907  | 8.379  | 8.402  | 8.238  | 8.178  | 8.305  | 8.174  | 7.559  | 7.323  | 26445  | PSMB2      | NM_011970_4_+1  |
| Psmb3      | 8.728  | 8.644  | 7.912  | 7.870  | 7.945  | 7.885  | 8.135  | 7.868  | 7.563  | 7.071  | 26446  | PSMB3      | NM_011971_11_+1 |
| Poli       | 3.960  | 3.603  | 3.225  | 2.727  | 3.079  | 3.265  | 2.192  | 2.369  | 2.091  | 1.777  | 26447  | POLI       | NM_011972_18_-1 |
| Mok        | 2.058  | 2.320  | -2.898 | -2.723 | -1.354 | -2.704 | -1.495 | -2.795 | -0.989 | -1.938 | 26448  | MOK        | NM_011973_12_-1 |
| Rpl27a     | 8.487  | 8.271  | 9.129  | 8.915  | 8.860  | 8.690  | 9.153  | 8.873  | 8.123  | 7.846  | 26451  | RPL27A     | NM_011975_7_+1  |
| Sema4g     | -2.948 | -2.997 | -4.300 | -2.901 | -4.320 | -3.469 | -3.674 | -4.770 | -2.425 | -3.758 | 26456  | SEMA4G     | NM_011976_19_+1 |
| Slc27a1    | 6.478  | 6.526  | 4.076  | 4.091  | 2.927  | 2.631  | 3.155  | 3.637  | 3.396  | 4.195  | 26457  | SLC27A1    | NM_011977_8_+1  |
| Slc27a2    | -4.981 | -4.981 | -4.352 | -3.384 | 1.967  | 2.838  | -0.299 | -1.777 | -1.777 | -4.981 | 26458  | SLC27A2    | NM_011978_2_+1  |
| Vnn3       | -1.567 | -4.981 | -1.183 | -3.117 | 0.096  | -4.600 | 1.528  | -2.439 | 3.822  | 0.097  | 26464  | NA         | NM_011979_10_+1 |
| Zfp146     | 2.167  | 0.148  | 1.844  | 0.544  | 1.619  | 0.502  | 1.389  | -0.120 | 1.470  | -0.892 | 26465  | ZNF146     | NM_011980_7_-1  |
| Zfp260     | 5.168  | 5.060  | 4.365  | 4.553  | 4.393  | 4.035  | 4.565  | 4.723  | 4.712  | 5.281  | 26466  | ZNF260     | NM_011981_7_+1  |
| Homer1     | -4.981 | -4.981 | -2.439 | -2.952 | -2.084 | -4.244 | -1.515 | -1.363 | 0.058  | 0.648  | 26556  | HOMER1     | NM_011982_13_+1 |
| Homer2     | -4.981 | -4.981 | 3.010  | 2.723  | -4.806 | -4.930 | -3.835 | -3.402 | -4.981 | -4.981 | 26557  | HOMER2     | NM_011983_7_-1  |
| Homer3     | -1.080 | -3.013 | -1.217 | -2.191 | -3.962 | -1.829 | -2.406 | -3.291 | -4.230 | -4.775 | 26558  | HOMER3     | NM_011984_8_+1  |
| Mmp23      | -2.013 | -1.395 | 2.422  | 2.314  | 3.406  | 3.540  | 3.098  | 1.850  | -3.322 | -4.981 | 26561  | MMP23B     | NM_011985_4_-1  |
| Ncdn       | 4.030  | 3.991  | 4.260  | 4.340  | 4.088  | 4.186  | 4.010  | 4.043  | 4.830  | 4.594  | 26562  | NCDN       | NM_011986_4_-1  |
| Slc27a3    | -0.451 | 1.882  | -0.341 | -1.200 | -1.948 | -3.289 | -1.056 | -1.752 | -0.510 | -1.422 | 26568  | SLC27A3    | NM_011988_3_-1  |
| Slc27a4    | 2.554  | 2.817  | 2.735  | 3.079  | 2.285  | 2.239  | 2.401  | 2.948  | 4.079  | 4.254  | 26569  | SLC27A4    | NM_011989_2_+1  |
| Slc7a11    | -2.117 | -2.486 | -0.681 | -2.050 | 2.781  | 0.212  | 3.265  | 1.186  | 1.937  | 0.892  | 26570  | SLC7A11    | NM_011990_3_-1  |
| Cops3      | 6.957  | 6.994  | 6.402  | 6.429  | 6.592  | 6.485  | 6.109  | 6.144  | 5.289  | 5.279  | 26572  | COPS3      | NM_011991_11_-1 |
| Rcn2       | 6.582  | 6.410  | 7.051  | 6.185  | 5.983  | 5.266  | 5.972  | 5.081  | 5.180  | 4.366  | 26611  | RCN2       | NM_011992_9_+1  |
| Abcd2      | 0.754  | 0.451  | 2.320  | 1.570  | 1.010  | 0.505  | 4.390  | 4.847  | 7.699  | 7.590  | 26874  | ABCD2      | NM_011994_15_-1 |
| Pclo       | -4.981 | -4.981 | -4.980 | -4.805 | -4.793 | -3.847 | -4.950 | -4.394 | -4.981 | -4.227 | 26875  | PCLO       | NM_011995_5_+1  |
| Casp8ap2   | 1.498  | 1.712  | 1.718  | 1.387  | 2.520  | 2.009  | 2.156  | 0.856  | 0.793  | 1.708  | 26885  | CASP8AP2   | NM_011997_4_+1  |
| Clec4a2    | 1.843  | 0.642  | 1.644  | 1.227  | 5.341  | 6.072  | 5.385  | 6.460  | 6.671  | 7.349  | 26888  | CLEC4A     | NM_011999_6_+1  |
| Cln8       | 5.514  | 5.911  | 6.122  | 5.598  | 6.982  | 6.999  | 6.589  | 6.784  | 7.731  | 7.666  | 26889  | CLN8       | NM_012000_8_+1  |
| Cops4      | 8.107  | 8.002  | 7.103  | 7.230  | 6.893  | 7.104  | 6.497  | 6.514  | 5.602  | 5.712  | 26891  | COPS4      | NM_012001_5_+1  |
| Cops6      | 8.035  | 7.999  | 7.302  | 7.450  | 7.034  | 7.050  | 7.137  | 7.308  | 6.635  | 6.481  | 26893  | COPS6      | NM_012002_5_+1  |
| Cops7a     | 5.342  | 5.459  | 5.604  | 5.923  | 5.288  | 5.614  | 5.276  | 5.660  | 4.804  | 5.086  | 26894  | COPS7A     | NM_012003_6_-1  |
| Med14      | -0.380 | -0.437 | 2.345  | 2.010  | 1.631  | 1.128  | 1.660  | 0.992  | 2.102  | 1.271  | 26896  | MED14      | NM_012005_X_-1  |
| Acot1      | 0.718  | -2.854 | -0.231 | -0.889 | -0.420 | -0.955 | -0.572 | 0.665  | 1.460  | 1.054  | 26897  | NA         | NM_012006_12_+1 |
| Sh2d1b1    | 6.053  | 6.127  | 2.396  | 2.636  | 6.684  | 6.727  | 6.273  | 5.410  | 5.090  | 3.182  | 26904  | SH2D1B     | NM_012009_1_+1  |
| Eif2s3x    | 5.728  | 5.686  | 6.193  | 6.476  | 6.036  | 6.226  | 6.063  | 6.258  | 5.818  | 6.007  | 26905  | EIF2S3     | NM_012010_X_-1  |
| Exo1       | -2.178 | -1.910 | 1.701  | 1.607  | 2.610  | 1.732  | 1.891  | 0.911  | -0.514 | -0.179 | 26909  | EXO1       | NM_012012_1_+1  |
| H2afy      | 6.480  | 5.870  | 7.680  | 7.496  | 7.358  | 7.053  | 7.352  | 7.166  | 6.955  | 6.483  | 26914  | H2AFY      | NM_012015_13_-1 |
| Ern2       | -4.981 | -4.981 | -3.309 | -3.044 | -2.987 | -3.275 | -4.963 | -4.944 | -4.981 | -4.981 | 26918  | ERN2       | NM_012016_7_-1  |
| Zfp346     | 2.772  | 3.090  | 3.403  | 3.398  | 3.463  | 3.269  | 2.961  | 2.923  | 3.186  | 3.318  | 26919  | ZNF346     | NM_012017_13_+1 |
| Cntrl      | 6.718  | 6.898  | 7.250  | 7.107  | 7.968  | 7.828  | 7.137  | 6.731  | 6.039  | 6.160  | 26920  | CNTRL      | NM_012018_2_+1  |
| Aifm1      | 4.820  | 4.886  | 4.948  | 5.516  | 4.982  | 5.162  | 4.795  | 5.261  | 4.941  | 5.239  | 26926  | AIFM1      | NM_012019_X_-1  |
| Prdx5      | 8.087  | 8.315  | 5.570  | 5.826  | 6.171  | 6.604  | 7.149  | 7.489  | 9.535  | 9.119  | 54683  | PRDX5      | NM_012021_19_-1 |
| Ppp2r5c    | 2.561  | 3.937  | 3.944  | 3.128  | 3.700  | 4.298  | 4.347  | 4.789  | 5.465  | 5.469  | 26931  | NA         | NM_012023_12_+1 |
| Ppp2r5e    | 4.244  | 4.258  | 4.558  | 4.626  | 4.817  | 4.744  | 4.522  | 4.480  | 4.636  | 4.810  | 26932  | PPP2R5E    | NM_012024_12_-1 |
| Racgap1    | 2.561  | 2.031  | 2.202  | 2.178  | 2.218  | 1.265  | 1.899  | 2.244  | 4.005  | 3.148  | 26934  | RACGAP1    | NM_012025_15_-1 |
| Arhgef28   | -4.981 | -2.344 | -4.642 | -4.710 | -1.056 | 0.327  | -4.198 | -3.862 | -3.242 | -3.386 | 110596 | ARHGEF28   | NM_012026_13_-1 |
| Mprp       | 1.731  | 1.988  | 3.089  | 2.653  | 0.893  | 0.537  | 3.016  | 2.529  | 3.183  | 2.993  | 26936  | MPRIP      | NM_012027_11_+1 |
| St6galnac5 | -4.981 | -4.981 | -4.972 | -4.972 | -4.976 | -4.749 | -2.629 | -4.234 | -3.322 | -4.981 | 26938  | ST6GALNAC5 | NM_012028_3_-1  |
| Ecsit      | 3.655  | 2.695  | 3.359  | 2.046  | 2.829  | 2.833  | 3.531  | 2.257  | 3.432  | 1.231  | 26940  | ECBIT      | NM_012029_9_-1  |
| Slc9a3r1   | 6.463  | 6.247  | 6.375  | 6.502  | 7.453  | 7.300  | 6.730  | 6.519  | 6.885  | 6.636  | 26941  | SLC9A3R1   | NM_012030_11_+1 |
| Spag1      | -0.259 | 0.147  | -1.178 | -1.656 | -1.852 | -1.054 | -1.444 | -1.267 | 0.893  | -1.167 | 26942  | SPAG1      | NM_012031_15_+1 |
| Serinc3    | 11.533 | 11.837 | 9.550  | 9.607  | 9.159  | 9.129  | 9.992  | 10.634 | 11.082 | 11.447 | 26943  | SERINC3    | NM_012032_2_-1  |
| Vat1       | -0.150 | 0.587  | 0.309  | -0.173 | -1.070 | -1.019 | 0.592  | 0.346  | 0.960  | 0.285  | 26949  | VAT1       | NM_012037_11_-1 |
| Zw10       | 3.555  | 3.910  | 3.944  | 4.577  | 4.629  | 4.630  | 4.008  | 4.499  | 3.976  | 4.419  | 26951  | ZW10       | NM_012039_9_+1  |
| Pnck       | 1.616  | 2.407  | -4.583 | -4.722 | -4.744 | -4.921 | -4.916 | -4.927 | -4.900 | -4.810 | 93843  | PNCK       | NM_012040_X_-1  |
| Cul1       | 6.393  | 6.645  | 7.053  | 6.976  | 6.836  | 6.847  | 6.855  | 6.937  | 6.946  | 7.159  | 26965  | CUL1       | NM_012042_6_+1  |
| Spo11      | -4.508 | -4.981 | -4.772 | -4.863 | -4.921 | -4.971 | -4.963 | -4.971 | -4.954 | -4.981 | 26972  | SPO11      | NM_012046_2_+1  |
| Brd7       | 5.845  | 5.879  | 5.646  | 5.667  | 5.694  | 5.674  | 5.973  | 5.857  | 6.189  | 6.396  | 26992  | BRD7       | NM_012047_8_-1  |
| Polk       | 2.390  | 2.886  | 3.621  | 3.540  | 3.442  | 3.823  | 3.328  | 3.422  | 3.585  | 3.654  | 27015  | POLK       | NM_012048_13_-1 |

|          |        |        |        |        |        |        |        |        |        |        |        |                 |                 |
|----------|--------|--------|--------|--------|--------|--------|--------|--------|--------|--------|--------|-----------------|-----------------|
| Nit1     | 4.669  | 5.131  | 4.191  | 4.470  | 4.452  | 4.593  | 3.983  | 3.966  | 3.279  | 3.697  | 27045  | NIT1            | NM_012049_1_-1  |
| Omd      | 1.335  | 1.157  | 1.541  | 1.099  | 1.270  | 1.242  | 0.659  | 0.589  | 0.204  | 0.311  | 27047  | OMD             | NM_012050_13_+1 |
| Etv3     | 2.745  | 2.734  | 5.171  | 5.088  | 5.648  | 5.271  | 5.595  | 4.433  | 3.601  | 4.353  | 27049  | ETV3            | NM_012051_3_+1  |
| Rps3     | 10.083 | 10.101 | 10.251 | 10.154 | 9.901  | 9.855  | 9.895  | 9.992  | 9.223  | 9.185  | 27050  | RPS3            | NM_012052_7_-1  |
| Rpl8     | 9.376  | 9.256  | 9.295  | 9.292  | 9.107  | 9.047  | 9.292  | 9.296  | 8.489  | 8.237  | 26961  | RPL8            | NM_012053_15_+1 |
| Aoah     | -1.193 | -4.981 | -1.223 | -4.292 | -1.416 | -3.593 | -0.044 | 0.036  | 5.681  | 3.683  | 27052  | AOAH            | NM_012054_13_+1 |
| Asns     | -3.090 | 0.622  | -2.389 | 2.656  | 0.214  | 3.062  | -0.276 | 3.777  | 0.946  | 2.011  | 27053  | ASNS            | NM_012055_6_-1  |
| Fkbp9    | -2.355 | -2.583 | -2.529 | -1.392 | -1.234 | -0.358 | -0.378 | 0.422  | -0.100 | 1.693  | 27055  | FKBP9           | NM_012056_6_+1  |
| Irf5     | 7.314  | 7.602  | 8.985  | 8.980  | 8.500  | 8.168  | 8.617  | 8.663  | 10.003 | 9.709  | 27056  | IRF5            | NM_012057_6_+1  |
| Srp9     | 8.077  | 6.569  | 7.395  | 6.161  | 6.893  | 5.615  | 7.188  | 6.028  | 6.856  | 5.523  | 27058  | SRP9            | NM_012058_1_+1  |
| Bcap31   | 8.331  | 8.527  | 7.436  | 7.638  | 7.348  | 7.471  | 7.665  | 7.837  | 7.503  | 7.337  | 27061  | BCAP31          | NM_012060_X_-1  |
| Cadps    | -4.981 | -4.981 | -4.968 | -4.865 | -3.974 | -4.722 | -4.981 | -4.981 | -4.597 | -4.981 | 27062  | CADPS           | NM_012061_14_-1 |
| Pde6g    | -3.080 | -1.995 | -3.547 | -4.940 | -4.547 | -3.667 | -4.953 | -3.232 | -4.981 | -4.981 | 18588  | PDE6G           | NM_012065_11_-1 |
| Atp1b2   | -4.981 | -4.981 | -3.587 | -1.377 | -1.817 | -0.805 | -3.219 | -0.541 | -2.685 | -1.593 | 11932  | ATP1B2          | NM_013415_11_-1 |
| Abca1    | -0.395 | -2.160 | 0.525  | 1.449  | 1.147  | 1.272  | 3.240  | 4.007  | 3.379  | 2.888  | 11303  | ABCA1           | NM_013454_4_-1  |
| Actn3    | -4.981 | -4.981 | -4.977 | -4.977 | -4.963 | -4.794 | -3.955 | -3.446 | -4.981 | -4.981 | 11474  | NA              | NM_013456_19_-1 |
| Add1     | 1.447  | 1.177  | 2.188  | 1.098  | 1.593  | 0.157  | 0.947  | 0.475  | 2.787  | -1.674 | 11518  | ADD1            | NM_013457_5_+1  |
| Add2     | -4.981 | -2.280 | -4.394 | -0.046 | -3.467 | -0.337 | -4.599 | 0.448  | -3.753 | -2.332 | 11519  | ADD2            | NM_013458_6_+1  |
| Adra1a   | -4.981 | -4.981 | -4.981 | -4.981 | -4.953 | -4.620 | -4.981 | -4.981 | -4.981 | -4.970 | 11549  | ADRA1A          | NM_013461_14_+1 |
| Gla      | 3.081  | 3.341  | 2.904  | 3.231  | 3.610  | 3.174  | 3.170  | 3.245  | 4.083  | 3.899  | 11605  | GLA             | NM_013463_X_-1  |
| Ahr      | 3.828  | 3.580  | 7.029  | 6.746  | 6.241  | 6.985  | 6.327  | 6.308  | 6.881  | 6.962  | 11622  | AHR             | NM_013464_12_-1 |
| Aldh1a1  | -2.647 | -4.981 | -1.519 | 2.030  | -2.500 | 2.116  | -0.847 | 2.682  | -1.985 | 1.125  | 11668  | ALDH1A1         | NM_013467_19_+1 |
| Anxa11   | 2.629  | 3.024  | 3.306  | 4.121  | 3.394  | 4.046  | 3.424  | 3.954  | 4.929  | 5.376  | 11744  | ANXA11          | NM_013469_14_+1 |
| Anxa3    | 1.714  | -0.209 | 5.712  | 6.199  | 6.699  | 5.701  | 6.163  | 5.886  | 5.765  | 6.180  | 11745  | ANXA3           | NM_013470_5_+1  |
| Anxa4    | 5.932  | 6.432  | 6.675  | 7.143  | 6.454  | 7.225  | 6.575  | 7.014  | 6.627  | 7.298  | 11746  | ANXA4           | NM_013471_6_-1  |
| Anxa6    | 6.344  | 6.146  | 9.140  | 9.022  | 8.840  | 8.569  | 7.761  | 7.966  | 8.004  | 8.360  | 11749  | ANXA6           | NM_013472_11_-1 |
| Apoa2    | -4.981 | -4.981 | -4.562 | -4.957 | -4.066 | -4.867 | -3.880 | -4.832 | -4.851 | -4.838 | 11807  | APOA2           | NM_013474_1_+1  |
| Ar       | -0.218 | 0.580  | -4.070 | -4.575 | -4.616 | -4.552 | -3.388 | -2.362 | -4.981 | -3.480 | 11835  | AR              | NM_013476_X_+1  |
| Atp6v0d1 | 6.347  | 6.342  | 6.043  | 6.157  | 6.096  | 6.125  | 6.238  | 6.088  | 6.755  | 6.685  | 11972  | ATP6V0D1        | NM_013477_8_-1  |
| Bop1     | 5.040  | 5.248  | 5.660  | 5.669  | 5.465  | 5.482  | 5.395  | 5.541  | 5.431  | 5.403  | 12181  | BOP1            | NM_013481_15_-1 |
| Btk      | 5.793  | 5.835  | 6.582  | 6.554  | 6.018  | 5.982  | 6.003  | 6.268  | 6.379  | 6.560  | 12229  | BTK             | NM_013482_X_-1  |
| Btn1a1   | -4.981 | -4.981 | -3.658 | -2.733 | -4.805 | -3.029 | -4.971 | -2.621 | -4.981 | -4.981 | 12231  | BTN1A1          | NM_013483_13_-1 |
| C2       | 1.368  | -0.697 | 0.485  | -0.045 | 1.401  | 0.109  | 1.265  | 0.675  | -0.981 | -2.539 | 12263  | C2              | NM_013484_17_-1 |
| Cd2      | 2.046  | 1.274  | -0.493 | 2.011  | 0.639  | 3.416  | 2.187  | 4.703  | 0.592  | 2.039  | 12481  | CD2             | NM_013486_3_-1  |
| Cd3d     | 1.852  | 1.231  | -0.048 | 1.814  | 0.606  | 3.207  | 1.643  | 3.924  | -1.382 | -0.086 | 12500  | CD3D            | NM_013487_9_+1  |
| Cd4      | 8.236  | 7.837  | 3.835  | 5.098  | 7.268  | 7.675  | 6.764  | 6.151  | -0.047 | -0.212 | 12504  | CD4             | NM_013488_6_-1  |
| Cd84     | 2.612  | 3.345  | 2.131  | 2.485  | 2.228  | 2.023  | 3.924  | 4.231  | 7.354  | 7.111  | 12523  | CD84            | NM_013489_1_+1  |
| Chka     | 2.133  | 2.524  | 3.677  | 3.441  | 5.204  | 5.276  | 4.627  | 2.975  | 2.478  | 0.579  | 12660  | CHKA            | NM_013490_19_+1 |
| Cln1     | -4.981 | -4.981 | -2.576 | -3.492 | 0.805  | 1.349  | -1.221 | -1.680 | -4.981 | -2.993 | 12723  | CLCN1           | NM_013491_6_+1  |
| Clu      | 1.931  | 0.118  | 1.928  | 3.429  | 0.987  | 1.954  | 3.529  | 3.097  | 1.757  | 1.928  | 12759  | CLU             | NM_013492_14_+1 |
| Cnbp     | 9.146  | 9.038  | 8.598  | 8.512  | 8.605  | 8.603  | 8.440  | 8.434  | 7.597  | 7.468  | 12785  | CNBP            | NM_013493_6_-1  |
| Cpe      | -4.981 | -4.981 | -2.836 | -3.980 | 3.057  | 2.703  | -3.586 | -2.070 | -4.981 | -3.480 | 12876  | CPE             | NM_013494_8_-1  |
| Cpt1a    | 3.364  | 3.699  | 4.954  | 5.192  | 4.248  | 4.336  | 5.623  | 6.086  | 7.731  | 8.032  | 12894  | CPT1A           | NM_013495_19_+1 |
| Creb3    | 8.496  | 7.646  | 7.182  | 6.866  | 6.801  | 6.581  | 6.614  | 6.449  | 6.652  | 6.366  | 12913  | CREB3           | NM_013497_4_+1  |
| Crem     | 0.238  | -1.277 | -1.405 | -0.237 | -1.978 | -3.125 | -2.952 | -1.312 | -1.922 | -0.402 | 12916  | CREM            | NM_013498_18_-1 |
| Cr1l     | 7.272  | 7.084  | 6.285  | 6.190  | 6.566  | 6.670  | 6.561  | 6.615  | 6.408  | 6.269  | 12946  | CR1L            | NM_013499_1_-1  |
| Cryaa    | -4.981 | -4.489 | -4.978 | -4.932 | -4.618 | -3.425 | -4.945 | -4.972 | -4.871 | -4.892 | 12954  | CRYAA LOC102724 | NM_013501_17_+1 |
| Ctbp1    | 3.902  | 3.817  | 3.778  | 3.627  | 3.847  | 3.802  | 4.142  | 3.489  | 4.601  | 4.423  | 13016  | CTBP1           | NM_013502_5_-1  |
| Drd5     | -4.981 | -4.981 | -4.925 | -4.166 | -4.970 | -4.705 | -4.377 | -3.542 | -4.981 | -4.981 | 13492  | DRD5            | NM_013503_5_+1  |
| Dsc2     | -4.981 | -4.981 | -4.981 | -4.981 | -4.960 | -3.922 | -4.972 | -2.669 | -4.981 | -4.981 | 13506  | DSC2            | NM_013505_18_-1 |
| Eif4a2   | 5.500  | 5.889  | 5.277  | 6.149  | 5.917  | 6.612  | 4.653  | 4.862  | -4.440 | -3.915 | 13682  | EIF4A2          | NM_013506_16_+1 |
| Eif4g2   | 7.489  | 7.405  | 8.551  | 8.517  | 8.327  | 8.165  | 8.305  | 8.343  | 9.226  | 9.581  | 13690  | EIF4G2          | NM_013507_7_-1  |
| Elk3     | 4.348  | 3.992  | 3.731  | 3.510  | 6.713  | 7.017  | 5.966  | 6.051  | 6.337  | 6.580  | 13713  | ELK3            | NM_013508_10_-1 |
| Eno2     | -2.842 | -4.981 | 3.150  | 3.462  | 2.589  | 3.219  | 1.099  | 1.299  | -4.981 | -4.963 | 13807  | ENO2            | NM_013509_6_-1  |
| Epb41l1  | -4.502 | -4.558 | -4.587 | -4.875 | -3.822 | -3.962 | -3.730 | -4.953 | -4.870 | -4.719 | 13821  | EPB41L1         | NM_013510_2_+1  |
| Epb41l2  | 4.033  | 4.000  | 5.373  | 5.121  | 5.006  | 4.825  | 5.188  | 4.611  | 4.447  | 4.543  | 13822  | EPB41L2         | NM_013511_10_+1 |
| Epb41l4a | -2.501 | -0.618 | -3.154 | -1.482 | -2.815 | -2.445 | -2.533 | -2.829 | -1.737 | -2.988 | 13824  | EPB41L4A        | NM_013512_18_-1 |
| Epb42    | -4.981 | 0.559  | -3.770 | 1.215  | -1.281 | 1.417  | -0.118 | 1.322  | -1.973 | 0.702  | 13828  | EPB42           | NM_013513_2_-1  |
| Dmtn     | -4.453 | -3.824 | -4.760 | -2.015 | -4.551 | -1.351 | -4.079 | -4.192 | -4.981 | -4.734 | 13829  | DMTN            | NM_013514_14_-1 |
| Stom     | 3.807  | 4.076  | 7.140  | 7.126  | 7.133  | 7.414  | 7.135  | 7.166  | 8.966  | 8.791  | 13830  | STOM            | NM_013515_2_-1  |
| Ms4a2    | -4.981 | -4.981 | -4.905 | -2.392 | -4.883 | -2.631 | 2.381  | -1.788 | -3.242 | -4.981 | 14126  | MS4A2           | NM_013516_19_-1 |
| Fcer2a   | 1.512  | 0.960  | 0.352  | 2.012  | 1.725  | 4.097  | 2.914  | 5.395  | -1.228 | 0.507  | 14128  | FCER2           | NM_013517_8_-1  |
| Fgf9     | -4.981 | -2.600 | -4.962 | -4.852 | -4.799 | -4.960 | -4.855 | -3.023 | -4.981 | -4.981 | 14180  | FGF9            | NM_013518_14_+1 |
| Flt3l    | 2.907  | 2.947  | 1.652  | 1.713  | 3.087  | 2.859  | 2.695  | 2.743  | 3.105  | 2.801  | 14256  | FLT3LG          | NM_013520_7_-1  |
| Fpr1     | 2.072  | -0.572 | 0.890  | 0.280  | 1.875  | 1.551  | 2.344  | 2.778  | 2.928  | 2.749  | 14293  | FPR1            | NM_013521_17_-1 |
| Frg1     | 7.356  | 7.158  | 6.797  | 6.647  | 6.718  | 6.569  | 6.770  | 6.521  | 6.167  | 6.124  | 14300  | FRG1            | NM_013522_8_-1  |
| Fut7     | -4.869 | -4.791 | -2.846 | -3.409 | -0.816 | -0.865 | -0.366 | 0.858  | -1.132 | -1.458 | 14347  | FUT7            | NM_013524_2_+1  |
| Gdf7     | -4.981 | -2.997 | -4.981 | -4.981 | -4.732 | -4.897 | -4.751 | -4.960 | -4.981 | -4.342 | 238057 | GDF7            | NM_013527_12_-1 |
| Gfpt1    | 4.345  | 4.404  | 6.272  | 5.990  | 6.117  | 6.047  | 6.091  | 5.324  | 5.063  | 4.526  | 14583  | GFPT1           | NM_013528_6_+1  |
| Gfpt2    | -2.948 | -4.981 | -1.938 | -0.414 | 1.732  | 1.829  | 0.361  | -0.097 | -4.981 | -4.981 | 14584  | GFPT2           | NM_013529_11_+1 |
| Gnb3     | -2.739 | 0.061  | -4.981 | -4.981 | -4.336 | -4.759 | -3.966 | -4.226 | -4.981 | -4.981 | 14695  | GNB3            | NM_013530_6_-1  |
| Gnb4     | 6.116  | 7.353  | 5.067  | 6.249  | 3.711  | 4.720  | 1.808  | 3.419  | 0.433  | 1.356  | 14696  | GNB4            | NM_013531_3_-1  |
| Lilrb4a  | 4.033  | 2.976  | 4.762  | 4.562  | 4.226  | 4.558  | 7.081  | 7.625  | 8.995  | 9.202  | 14728  | LILRB4          | NM_013532_10_+1 |
| Gpr162   | 2.393  | 2.466  | -0.470 | -0.584 | 1.106  | -0.204 | 1.192  | 0.344  | -3.043 | -4.316 | 14788  | GPR162          | NM_013533_6_-1  |

|            |        |        |        |        |        |        |        |        |        |        |        |                                     |                 |
|------------|--------|--------|--------|--------|--------|--------|--------|--------|--------|--------|--------|-------------------------------------|-----------------|
| P3h3       | 1.947  | 2.143  | 0.572  | 0.666  | 1.174  | 1.050  | 1.553  | 1.614  | -2.039 | -1.195 | 14789  | P3H3                                | NM_013534_6_-1  |
| Grcc10     | 8.099  | 7.924  | 7.356  | 7.076  | 6.555  | 6.876  | 7.300  | 7.249  | 6.580  | 6.232  | 14790  | C12orf57                            | NM_013535_6_-1  |
| Emg1       | 7.262  | 7.401  | 6.474  | 6.509  | 6.538  | 6.496  | 6.449  | 6.552  | 5.819  | 5.783  | 14791  | EMG1                                | NM_013536_6_-1  |
| Cdca3      | 1.107  | 1.294  | 4.388  | 4.306  | 4.814  | 3.944  | 4.238  | 3.276  | 2.744  | 1.780  | 14793  | CDCA3                               | NM_013538_6_+1  |
| Spsb2      | 3.050  | 4.100  | 3.061  | 3.171  | 2.624  | 2.429  | 3.221  | 2.833  | 3.629  | 3.792  | 14794  | SPSB2                               | NM_013539_6_+1  |
| Gstp1      | 8.324  | 8.149  | 7.037  | 7.059  | 7.290  | 7.496  | 7.647  | 7.642  | 7.393  | 6.943  | 14870  | GSTP1                               | NM_013541_19_-1 |
| Gzmb       | -4.981 | -4.981 | -3.727 | -1.903 | -1.893 | 1.330  | 1.179  | -1.075 | -1.022 | -4.981 | 14939  | NA                                  | NM_013542_14_-1 |
| H2-Ke6     | 7.500  | 7.446  | 6.291  | 6.329  | 6.781  | 6.833  | 6.736  | 6.552  | 5.368  | 4.939  | 14979  | HSD17B8                             | NM_013543_17_-1 |
| Ptpn6      | 9.956  | 9.917  | 8.333  | 8.305  | 10.022 | 10.086 | 9.770  | 10.013 | 10.443 | 10.424 | 15170  | PTPN6                               | NM_013545_6_-1  |
| Hebp1      | 0.223  | 4.209  | -0.582 | 5.238  | 0.578  | 7.649  | 1.688  | 6.800  | -0.637 | 6.746  | 15199  | HEBP1                               | NM_013546_6_-1  |
| Hgd        | -4.981 | -4.981 | -3.668 | -3.842 | -4.581 | -3.503 | -4.721 | -4.551 | -3.354 | -4.981 | 15233  | HGD                                 | NM_013547_16_+1 |
| Hist1h3f   | 0.153  | -2.890 | 0.117  | -2.504 | -0.176 | -1.532 | -0.550 | -3.424 | -2.143 | -4.128 | 260423 | HIST2H3A                            | NM_013548_13_+1 |
| Hist2h2aa1 | 6.034  | 4.642  | 5.110  | 4.002  | 3.947  | 3.824  | 4.249  | 3.912  | 3.869  | 3.200  | 15267  | HIST2H2AA3 HIST2NM_013549_3_-1      |                 |
| Hist2h2aa1 | 6.030  | 4.680  | 4.323  | 3.538  | 3.658  | 2.638  | 4.451  | 2.345  | 4.505  | 3.041  | 15267  | HIST2H2AA3 HIST2NM_013549_dup1_3_+1 |                 |
| Hist1h3a   | 1.482  | 0.954  | 1.410  | 0.700  | 2.348  | 1.348  | 2.116  | 0.585  | 0.834  | -0.352 | 360198 | HIST1H3D                            | NM_013550_13_-1 |
| Hmbs       | 5.006  | 5.011  | 4.910  | 5.318  | 5.192  | 5.518  | 5.117  | 5.559  | 5.310  | 5.134  | 15288  | HMBS                                | NM_013551_9_-1  |
| Hmmr       | -1.901 | -1.497 | 2.720  | 3.461  | 3.687  | 3.362  | 3.348  | 2.651  | 1.214  | 0.879  | 15366  | HMMR                                | NM_013552_11_-1 |
| Hoxc4      | -4.981 | -4.981 | -3.990 | -2.763 | 1.866  | 2.531  | -2.126 | -2.550 | -4.981 | -4.981 | 15423  | HOXC4                               | NM_013553_15_+1 |
| Hprt       | 7.123  | 7.162  | 7.256  | 7.199  | 7.300  | 7.196  | 7.305  | 7.322  | 7.346  | 7.140  | 15452  | HPRT1                               | NM_013556_X_+1  |
| Eif2ak1    | 5.801  | 5.621  | 6.493  | 6.456  | 6.086  | 5.891  | 6.203  | 6.220  | 7.042  | 6.804  | 15467  | EIF2AK1                             | NM_013557_5_+1  |
| Hspa1l     | -0.643 | -1.404 | -0.205 | -1.511 | 0.103  | -1.091 | -0.975 | -1.037 | -3.257 | -1.322 | 15482  | HSPA1L                              | NM_013558_17_+1 |
| Hsph1      | 3.831  | 3.768  | 5.722  | 4.982  | 5.987  | 4.863  | 5.542  | 4.699  | 3.415  | 4.148  | 15505  | HSPH1                               | NM_013559_5_-1  |
| Hspb1      | -2.388 | -1.340 | 1.853  | 1.500  | 0.962  | 1.050  | 1.521  | -0.251 | -3.531 | -2.266 | 15507  | HSPB1                               | NM_013560_5_+1  |
| Ifrd1      | 6.224  | 6.536  | 5.872  | 5.741  | 7.057  | 7.089  | 6.707  | 6.513  | 5.298  | 5.526  | 15982  | IFRD1                               | NM_013562_12_-1 |
| Il2rg      | 9.071  | 8.833  | 7.381  | 7.513  | 9.563  | 9.753  | 9.484  | 9.547  | 7.693  | 7.981  | 16186  | IL2RG                               | NM_013563_X_-1  |
| Insl3      | 0.597  | -0.700 | -2.670 | -2.712 | -0.660 | -0.403 | -1.114 | -2.204 | -4.981 | -4.981 | 16336  | INSL3                               | NM_013564_8_+1  |
| Itga3      | -4.255 | -1.897 | -0.973 | 0.541  | -4.893 | -4.944 | -3.693 | -3.373 | -4.764 | -4.881 | 16400  | ITGA3                               | NM_013565_11_-1 |
| Itgb7      | 8.169  | 8.131  | 7.703  | 7.698  | 8.285  | 8.270  | 8.438  | 8.696  | 9.730  | 9.383  | 16421  | ITGB7                               | NM_013566_15_-1 |
| Kcna6      | -4.981 | -4.981 | -4.981 | -4.981 | -4.988 | -3.758 | -4.963 | -4.635 | -4.981 | -4.981 | 16494  | KCNA6                               | NM_013568_6_-1  |
| Ksr1       | -3.563 | -2.895 | -1.148 | -0.840 | 0.688  | 0.239  | -0.386 | -1.655 | 0.602  | 0.292  | 16706  | KSR1                                | NM_013571_11_-1 |
| Ldhc       | -4.981 | -4.981 | -4.945 | -4.076 | -3.963 | -3.209 | -1.734 | -3.889 | -1.795 | -4.981 | 16833  | LDHC                                | NM_013580_7_+1  |
| Cog1       | 4.778  | 4.838  | 4.744  | 4.835  | 4.793  | 4.890  | 4.689  | 4.593  | 5.053  | 5.491  | 16834  | COG1                                | NM_013581_11_+1 |
| Lifr       | 7.308  | 7.716  | 2.603  | 2.110  | 2.630  | 2.588  | 3.611  | 3.432  | 4.911  | 4.742  | 16880  | LIFR                                | NM_013584_15_+1 |
| Psmb9      | 8.982  | 8.569  | 9.681  | 9.802  | 8.902  | 8.820  | 8.489  | 8.128  | 6.983  | 6.253  | 16912  | PSMB9                               | NM_013585_17_-1 |
| Loxl3      | 0.319  | 0.173  | 3.689  | 4.163  | 2.912  | 3.254  | 2.801  | 3.309  | 0.282  | 2.593  | 16950  | LOXL3                               | NM_013586_6_+1  |
| Lrpap1     | 7.070  | 7.176  | 6.054  | 6.310  | 5.926  | 6.006  | 6.247  | 6.619  | 7.319  | 7.267  | 16976  | LRPAP1                              | NM_013587_5_-1  |
| Ltbp2      | -1.243 | -4.981 | 4.615  | 4.580  | 1.868  | 0.835  | 1.334  | -0.802 | -2.451 | -4.981 | 16997  | LTBP2                               | NM_013589_12_-1 |
| Lyz1       | 1.710  | -2.895 | 5.037  | 4.336  | 0.773  | 0.276  | 7.825  | 7.566  | 8.428  | 7.997  | 17110  | LYZ                                 | NM_013590_10_-1 |
| Madcam1    | -3.668 | -4.981 | -3.710 | -4.247 | -4.555 | -2.686 | -4.955 | -4.924 | -4.190 | -4.981 | 17123  | NA                                  | NM_013591_10_+1 |
| Mbd1       | 3.842  | 3.576  | 4.016  | 4.206  | 4.132  | 3.920  | 4.146  | 4.193  | 4.565  | 4.611  | 17190  | MBD1                                | NM_013594_18_+1 |
| Mbd3       | 5.232  | 5.087  | 4.272  | 4.623  | 3.919  | 4.395  | 3.915  | 3.952  | 3.371  | 3.212  | 17192  | MBD3                                | NM_013595_10_-1 |
| Mc5r       | -2.178 | -1.814 | -4.967 | -3.943 | -1.805 | -3.981 | -4.974 | -4.978 | -1.712 | -2.867 | 17203  | MC5R                                | NM_013596_18_+1 |
| Kitl       | -1.324 | -2.060 | -3.932 | -0.498 | -1.726 | -2.988 | -3.710 | 0.150  | -1.973 | -1.751 | 17311  | KITLG                               | NM_013598_10_+1 |
| Mmp9       | -1.681 | -3.267 | -1.852 | 0.091  | 5.844  | 6.568  | 2.922  | 3.819  | 1.441  | 0.468  | 17395  | MMP9                                | NM_013599_2_+1  |
| Msh5       | -4.212 | -3.927 | -2.957 | -2.648 | -2.938 | -3.315 | -2.796 | -4.240 | -4.485 | -4.858 | 17687  | MSH5                                | NM_013600_17_-1 |
| Mt1        | 2.175  | 1.548  | 5.678  | 5.014  | 4.568  | 4.482  | 6.174  | 5.453  | 3.303  | 3.496  | 17748  | NA                                  | NM_013602_8_+1  |
| Mt3        | -3.189 | -4.981 | -3.296 | -4.693 | -4.817 | -4.972 | -3.908 | -4.325 | -4.981 | -4.981 | 17751  | NA                                  | NM_013603_8_+1  |
| Mtx1       | 6.517  | 6.333  | 5.696  | 5.675  | 5.690  | 5.796  | 5.605  | 5.544  | 5.380  | 4.909  | 17827  | MTX1                                | NM_013604_3_-1  |
| Muc1       | -0.585 | 0.558  | -2.570 | -1.900 | -1.792 | -2.164 | -1.053 | -2.537 | -4.394 | -1.711 | 17829  | NA                                  | NM_013605_3_+1  |
| Mx2        | -0.567 | 0.014  | -4.674 | -2.204 | -4.619 | -4.680 | -3.792 | -4.737 | -0.792 | -4.640 | 17858  | NA                                  | NM_013606_16_+1 |
| Myh11      | -4.981 | -4.981 | -4.447 | -4.407 | -4.972 | -4.972 | -4.975 | -4.677 | -4.981 | -4.981 | 17880  | MYH11                               | NM_013607_16_-1 |
| Naca       | 8.885  | 8.908  | 8.856  | 8.873  | 8.799  | 8.708  | 8.794  | 8.762  | 7.812  | 7.791  | 17938  | NACA                                | NM_013608_10_+1 |
| Ninj1      | 6.094  | 5.763  | 4.964  | 5.371  | 4.717  | 4.670  | 5.734  | 6.208  | 7.756  | 7.303  | 18081  | NINJ1                               | NM_013610_13_+1 |
| Nodal      | -4.981 | -4.981 | -4.961 | -4.961 | -4.973 | -4.973 | -4.510 | -0.331 | -4.981 | -4.981 | 18119  | NODAL                               | NM_013611_10_+1 |
| Slc11a1    | 2.969  | 0.477  | 7.317  | 7.243  | 3.471  | 3.003  | 6.648  | 7.509  | 8.369  | 8.315  | 18173  | SLC11A1                             | NM_013612_1_+1  |
| Nr4a2      | -2.492 | -3.628 | 3.850  | 3.007  | 4.566  | 4.082  | 2.616  | 1.171  | 1.006  | -0.338 | 18227  | NR4A2                               | NM_013613_2_-1  |
| Odc1       | 6.836  | 6.542  | 6.704  | 6.838  | 6.023  | 6.145  | 5.117  | 5.975  | 4.155  | 3.819  | 18263  | ODC1                                | NM_013614_12_+1 |
| Odf2       | 0.073  | -0.859 | 0.233  | 0.116  | 0.544  | -1.108 | 0.087  | -0.544 | 1.551  | 0.116  | 18286  | ODF2                                | NM_013615_2_+1  |
| Oprd1      | -4.981 | -2.353 | 1.432  | 1.259  | 0.111  | 0.230  | -1.088 | -2.761 | -4.981 | -4.981 | 18386  | OPRD1                               | NM_013622_4_-1  |
| Orm3       | -3.843 | -4.981 | -3.918 | -4.829 | -4.237 | -4.553 | -4.173 | -4.537 | -4.981 | -4.981 | 18407  | NA                                  | NM_013623_4_+1  |
| Pafah1b1   | 5.338  | 5.384  | 4.969  | 4.591  | 5.082  | 4.863  | 5.316  | 5.012  | 5.018  | 5.222  | 18472  | PAFAH1B1                            | NM_013625_11_-1 |
| Pam        | 0.881  | 1.588  | -0.175 | 2.131  | 0.287  | 1.248  | 0.554  | 2.058  | 1.466  | 3.549  | 18484  | PAM                                 | NM_013626_1_-1  |
| Pax6       | -4.981 | -4.981 | -4.953 | -4.978 | -4.977 | -4.981 | -4.981 | -4.981 | -4.981 | -4.981 | 18508  | PAX6                                | NM_013627_2_+1  |
| Phtf1      | 4.143  | 3.839  | 3.469  | 3.745  | 3.824  | 4.392  | 3.908  | 3.133  | 3.271  | 3.375  | 18685  | PHTF1                               | NM_013629_3_+1  |
| Pkd1       | 4.960  | 4.865  | 4.602  | 4.496  | 4.874  | 4.936  | 4.677  | 4.805  | 5.443  | 5.432  | 18763  | PKD1                                | NM_013630_17_+1 |
| Pklr       | -4.981 | -2.459 | -4.284 | -1.308 | -2.820 | 0.320  | -4.750 | 0.444  | -4.981 | -1.837 | 18770  | PKLR                                | NM_013631_3_+1  |
| Pnp        | 6.288  | 6.199  | 6.599  | 6.424  | 6.641  | 6.159  | 7.062  | 6.411  | 7.876  | 6.376  | 18950  | PNP                                 | NM_013632_14_+1 |
| Pou5f1     | -4.981 | -4.981 | -4.981 | -4.981 | -4.981 | -4.981 | -4.981 | -4.981 | -4.981 | -4.981 | 18999  | POU5F1                              | NM_013633_17_+1 |
| Med1       | 2.187  | 3.117  | 2.131  | 1.890  | 2.207  | 2.132  | 2.149  | 3.477  | 0.584  | 3.288  | 19014  | MED1                                | NM_013634_11_-1 |
| Sypl       | 0.113  | 1.685  | -2.923 | -3.417 | -2.578 | -2.339 | -1.676 | -0.357 | -3.082 | 0.776  | 19027  | SYPL1                               | NM_013635_12_+1 |
| Ppp1cc     | 8.087  | 8.068  | 7.391  | 7.328  | 7.936  | 7.807  | 7.596  | 7.613  | 7.627  | 7.532  | 19047  | NA                                  | NM_013636_5_+1  |
| Prm1       | -4.981 | -4.981 | -4.767 | -5.000 | -4.832 | -4.951 | -4.864 | -4.435 | -4.981 | -4.981 | 19118  | NA                                  | NM_013637_16_-1 |
| Prph       | -2.291 | -2.787 | -0.649 | 1.304  | -1.824 | -4.913 | -4.344 | -4.803 | -4.981 | -4.981 | 19132  | PRPH                                | NM_013639_15_+1 |
| Psmb10     | 8.653  | 8.518  | 7.464  | 7.571  | 7.705  | 7.710  | 7.842  | 7.739  | 7.490  | 7.121  | 19171  | PSMB10                              | NM_013640_8_-1  |

|          |        |        |        |        |        |        |        |        |        |        |       |          |                 |
|----------|--------|--------|--------|--------|--------|--------|--------|--------|--------|--------|-------|----------|-----------------|
| Ptger1   | 2.247  | 1.738  | 3.079  | 2.642  | 2.998  | 2.695  | 2.953  | 2.555  | 4.477  | 4.048  | 19216 | PTGER1   | NM_013641_8_+1  |
| Dusp1    | 7.448  | 7.138  | 9.867  | 9.585  | 10.867 | 10.785 | 10.530 | 10.555 | 10.897 | 11.001 | 19252 | DUSP1    | NM_013642_17_-1 |
| Ptpn5    | -3.702 | -3.422 | -4.981 | -4.981 | -4.980 | -4.980 | -4.907 | -4.872 | -4.981 | -4.981 | 19259 | PTPN5    | NM_013643_7_-1  |
| Rora     | -2.164 | 6.317  | -1.238 | -1.889 | -3.936 | -2.671 | -0.503 | -4.609 | -3.816 | -3.895 | 19883 | RORA     | NM_013646_9_+1  |
| Rps16    | 9.041  | 8.876  | 9.225  | 9.115  | 8.966  | 8.759  | 9.319  | 9.109  | 8.136  | 7.792  | 20055 | RPS16    | NM_013647_7_+1  |
| Rtn2     | -4.981 | -2.883 | -2.892 | -1.542 | -4.262 | -2.182 | -2.780 | -3.023 | -3.043 | -4.981 | 20167 | RTN2     | NM_013648_7_+1  |
| Ryk      | -4.386 | -4.360 | -2.894 | -0.193 | -4.730 | 0.666  | -4.197 | 0.163  | -1.151 | -3.293 | 20187 | RYK      | NM_013649_9_+1  |
| S100a8   | -1.631 | -1.310 | 0.323  | 4.588  | 0.687  | 7.196  | 3.660  | 8.047  | 10.079 | 3.718  | 20201 | S100A8   | NM_013650_3_+1  |
| Sf3a2    | 3.283  | 3.159  | 3.690  | 3.633  | 4.022  | 3.538  | 3.772  | 3.660  | 4.322  | 4.064  | 20222 | NA       | NM_013651_10_+1 |
| Ccl4     | 11.362 | 11.662 | 6.091  | 4.874  | 8.750  | 8.767  | 8.628  | 6.692  | 3.824  | 3.651  | 20303 | CCL4     | NM_013652_11_+1 |
| Ccl5     | 4.331  | 2.120  | 7.551  | 7.713  | 9.500  | 9.176  | 8.069  | 6.657  | 2.083  | -0.311 | 20304 | CCL5     | NM_013653_11_-1 |
| Ccl7     | -4.981 | -4.981 | -1.108 | -0.918 | -4.574 | -4.980 | 0.669  | -1.762 | -2.724 | -1.476 | 20306 | NA       | NM_013654_11_+1 |
| Cxcl12   | -2.739 | -4.981 | -3.499 | -4.707 | -3.241 | -4.710 | -3.732 | -4.701 | -1.618 | -3.233 | 20315 | CXCL12   | NM_013655_6_+1  |
| Sema4a   | -4.084 | -3.909 | 5.099  | 5.811  | -0.205 | 1.170  | 4.250  | 3.991  | 5.920  | 5.724  | 20351 | SEMA4A   | NM_013658_3_-1  |
| Sema4b   | 6.668  | 6.503  | -0.178 | -0.053 | 2.731  | 3.007  | 1.286  | 2.374  | 2.362  | 1.625  | 20352 | SEMA4B   | NM_013659_7_+1  |
| Sema4d   | 5.722  | 6.206  | 4.913  | 4.916  | 6.721  | 6.782  | 6.586  | 6.477  | 7.635  | 7.570  | 20354 | SEMA4D   | NM_013660_13_-1 |
| Sema5b   | -4.981 | -3.408 | 1.692  | -1.774 | -4.978 | -4.978 | -4.981 | -4.981 | -4.981 | -4.981 | 20357 | SEMA5B   | NM_013661_16_+1 |
| Sema6b   | -4.451 | -4.981 | -1.272 | -0.376 | -3.260 | -4.898 | -1.814 | -0.993 | 1.340  | 1.435  | 20359 | SEMA6B   | NM_013662_17_-1 |
| Srsf3    | 8.982  | 9.061  | 8.815  | 8.827  | 8.811  | 8.604  | 8.568  | 8.396  | 7.347  | 7.434  | 20383 | SRSF3    | NM_013663_17_+1 |
| Sh3gl1   | 6.378  | 6.472  | 6.279  | 6.390  | 5.733  | 5.935  | 5.627  | 6.154  | 6.092  | 6.229  | 20405 | SH3GL1   | NM_013664_17_-1 |
| Kdm5c    | 4.450  | 4.842  | 5.315  | 5.528  | 5.542  | 5.483  | 5.254  | 5.448  | 5.665  | 6.207  | 20591 | KDM5C    | NM_013665_X_+1  |
| Snap91   | -4.981 | -4.981 | -4.981 | -4.981 | -4.981 | -4.981 | -4.981 | -4.981 | -4.981 | -4.981 | 20616 | SNAP91   | NM_013669_9_-1  |
| Snrpn    | -1.764 | -2.209 | -3.960 | -4.642 | -3.576 | -2.138 | -3.781 | -2.543 | -4.981 | -4.981 | 20646 | SNRPN    | NM_013670_7_-1  |
| Sod2     | 6.758  | 6.577  | 6.857  | 6.830  | 6.007  | 6.105  | 6.599  | 6.833  | 6.508  | 6.886  | 20656 | SOD2     | NM_013671_17_+1 |
| Sp1      | 4.660  | 5.057  | 4.753  | 4.664  | 5.135  | 5.065  | 5.270  | 5.231  | 5.458  | 5.761  | 20683 | SP1      | NM_013672_15_+1 |
| Sp100    | 7.490  | 7.169  | 7.126  | 6.833  | 7.066  | 6.689  | 7.064  | 7.111  | 8.280  | 7.838  | 20684 | NA       | NM_013673_1_+1  |
| Irf4     | 5.350  | 5.822  | 4.149  | 3.711  | 6.532  | 6.506  | 5.545  | 5.742  | 5.791  | 5.264  | 16364 | IRF4     | NM_013674_13_+1 |
| Sptb     | -3.843 | 0.358  | -0.940 | 1.610  | -0.253 | 1.703  | -0.284 | 1.410  | -0.132 | 1.053  | 20741 | SPTB     | NM_013675_12_-1 |
| Supt5    | 6.318  | 6.343  | 6.626  | 6.678  | 7.132  | 6.983  | 7.144  | 6.939  | 7.398  | 7.318  | 20924 | SUPT5H   | NM_013676_7_-1  |
| Surf1    | 5.762  | 5.798  | 4.949  | 5.009  | 4.664  | 4.707  | 4.757  | 4.962  | 4.716  | 4.655  | 20930 | SURF1    | NM_013677_2_-1  |
| Surf2    | 5.405  | 5.398  | 4.293  | 4.454  | 4.702  | 4.866  | 4.449  | 4.413  | 3.820  | 3.632  | 20931 | SURF2    | NM_013678_2_+1  |
| Syn1     | -3.916 | -4.981 | -4.880 | -4.856 | -4.542 | -4.935 | -4.794 | -4.660 | -4.110 | -4.529 | 20964 | SYN1     | NM_013680_X_-1  |
| Tap1     | 6.594  | 6.144  | 8.712  | 8.818  | 7.377  | 7.044  | 7.416  | 7.272  | 7.063  | 6.391  | 21354 | TAP1     | NM_013683_17_+1 |
| Tbp      | 5.507  | 5.906  | 4.980  | 4.745  | 5.424  | 4.920  | 5.192  | 4.947  | 4.961  | 4.767  | 21374 | TBP      | NM_013684_17_+1 |
| Tcf4     | 9.060  | 8.977  | 5.009  | 4.664  | 4.446  | 4.368  | 4.556  | 4.933  | 4.402  | 4.479  | 21413 | TCF4     | NM_013685_18_+1 |
| Tcp1     | 7.020  | 7.081  | 7.659  | 7.732  | 7.276  | 7.272  | 7.159  | 7.269  | 6.661  | 6.608  | 21454 | TCP1     | NM_013686_17_+1 |
| Tcp11    | -4.829 | -4.981 | -4.517 | -4.501 | -3.978 | -4.064 | -4.706 | -4.990 | -0.281 | -4.948 | 21463 | TCP11    | NM_013687_17_-1 |
| Tcte1    | -4.981 | -4.981 | -3.783 | -4.876 | -0.042 | -2.223 | -3.557 | -3.817 | -4.981 | -4.981 | 21645 | TCTE1    | NM_013688_17_+1 |
| Tec      | -3.587 | -0.725 | -0.159 | -0.412 | 1.647  | -1.204 | 1.605  | -0.614 | 2.421  | 0.045  | 21682 | TEC      | NM_013689_5_-1  |
| Tek      | -4.981 | -4.349 | -4.948 | -4.436 | -4.898 | -4.949 | -4.970 | -4.892 | -4.981 | -4.981 | 21687 | TEK      | NM_013690_4_+1  |
| Thbs3    | -1.551 | -1.944 | -3.355 | -4.060 | -3.496 | -4.168 | -2.317 | -1.949 | -0.537 | 0.939  | 21827 | THBS3    | NM_013691_3_+1  |
| Klf10    | 3.582  | 3.582  | 3.125  | 3.107  | 3.813  | 3.088  | 5.835  | 5.922  | 8.482  | 8.286  | 21847 | KLF10    | NM_013692_15_-1 |
| Tnf      | 4.295  | 2.660  | 5.152  | 5.259  | 5.820  | 6.261  | 4.619  | 4.678  | 3.147  | 3.484  | 21926 | TNF      | NM_013693_17_-1 |
| Tnp2     | -1.626 | -4.981 | -3.961 | -3.078 | -3.136 | -4.094 | -4.919 | -4.346 | -4.981 | -4.981 | 21959 | NA       | NM_013694_16_-1 |
| Txk      | -4.258 | -4.981 | -4.819 | -4.760 | -4.793 | -4.922 | -4.932 | -4.131 | -4.308 | -4.906 | 22165 | TXK      | NM_013698_5_-1  |
| Ubp1     | 5.051  | 4.645  | 5.584  | 5.301  | 5.639  | 5.473  | 5.370  | 5.367  | 5.224  | 5.483  | 22221 | UBP1     | NM_013699_9_+1  |
| Usp5     | 4.874  | 4.922  | 5.298  | 5.449  | 5.427  | 5.367  | 5.372  | 5.557  | 6.275  | 5.913  | 22225 | USP5     | NM_013700_6_-1  |
| Ugt1a2   | -4.981 | -4.981 | -1.748 | -0.462 | -3.340 | -2.915 | -1.715 | -2.778 | -0.160 | 0.217  | 22236 | UGT1A3   | NM_013701_1_+1  |
| Zfp30    | -4.981 | -0.445 | -4.110 | -1.230 | -3.748 | -1.511 | -4.687 | -0.721 | -2.953 | 0.234  | 22693 | ZFP30    | NM_013705_7_+1  |
| Cd52     | 10.136 | 8.663  | 11.654 | 11.354 | 11.106 | 10.894 | 11.422 | 10.792 | 10.416 | 9.532  | 23833 | NA       | NM_013706_4_-1  |
| Sh3yl1   | 0.394  | -1.084 | -3.213 | -2.327 | -2.259 | -1.021 | -1.953 | -0.574 | 0.436  | -0.001 | 24057 | SH3YL1   | NM_013709_12_+1 |
| Fgd2     | 6.286  | 6.206  | 8.665  | 8.682  | 7.342  | 7.362  | 7.210  | 7.527  | 5.888  | 6.444  | 26382 | FGD2     | NM_013710_17_+1 |
| Txnrd2   | 4.125  | 3.929  | 4.079  | 4.308  | 3.944  | 4.495  | 4.283  | 4.750  | 4.474  | 4.618  | 26462 | TXNRD2   | NM_013711_16_+1 |
| Itgb1bp2 | -1.709 | -2.997 | -1.083 | -2.563 | -3.611 | -4.551 | -3.504 | -3.915 | -4.981 | -4.981 | 26549 | ITGB1BP2 | NM_013712_X_+1  |
| Cops5    | 6.534  | 6.452  | 6.721  | 6.742  | 6.187  | 6.099  | 6.152  | 6.126  | 5.678  | 5.568  | 26754 | COP55    | NM_013715_1_-1  |
| G3bp1    | 7.271  | 7.146  | 8.090  | 8.307  | 8.262  | 8.035  | 7.936  | 7.788  | 6.761  | 6.925  | 27041 | G3BP1    | NM_013716_11_+1 |
| B9d1     | 2.232  | 2.978  | 0.698  | 1.593  | -1.181 | 1.020  | -1.468 | 0.983  | -3.531 | -1.683 | 27078 | B9D1     | NM_013717_11_+1 |
| Trappc3  | 6.849  | 6.875  | 6.104  | 6.152  | 6.112  | 6.092  | 5.901  | 5.850  | 5.750  | 5.654  | 27096 | TRAPPC3  | NM_013718_4_+1  |
| Eif2ak4  | 2.985  | 3.399  | 5.023  | 5.216  | 4.729  | 5.202  | 4.356  | 4.494  | 3.234  | 3.929  | 27103 | EIF2AK4  | NM_013719_2_+1  |
| Mga      | 3.371  | 3.722  | 4.757  | 3.719  | 4.153  | 4.578  | 4.218  | 4.342  | 4.343  | 4.617  | 29808 | MGA      | NM_013720_2_+1  |
| Rpl7a    | 8.538  | 8.459  | 8.677  | 8.624  | 8.592  | 8.388  | 8.693  | 8.548  | 7.903  | 7.740  | 27176 | RPL7A    | NM_013721_2_+1  |
| Syn3     | -1.097 | -1.322 | -1.751 | -0.292 | -0.595 | -1.069 | -0.114 | -1.479 | -0.612 | 0.701  | 27204 | SYN3     | NM_013722_10_-1 |
| Podxl    | -4.981 | -4.981 | -4.976 | -4.882 | -4.173 | -4.195 | -4.931 | -4.193 | -3.925 | -4.981 | 27205 | NA       | NM_013723_6_-1  |
| Rps11    | 10.527 | 10.387 | 11.218 | 10.961 | 10.424 | 10.231 | 10.641 | 10.503 | 9.283  | 9.123  | 27207 | RPS11    | NM_013725_7_-1  |
| Dbf4     | 4.757  | 3.946  | 3.859  | 3.719  | 4.444  | 4.013  | 4.310  | 3.088  | 2.769  | 2.285  | 27214 | DBF4     | NM_013726_5_-1  |
| Azi2     | 5.289  | 5.737  | 5.027  | 4.903  | 4.712  | 4.958  | 5.455  | 5.174  | 5.580  | 5.827  | 27215 | AZI2     | NM_013727_9_+1  |
| Slamf1   | -2.647 | -0.696 | -1.613 | -0.172 | -0.210 | 1.040  | -0.579 | 1.400  | -0.879 | -1.519 | 27218 | SLAMF1   | NM_013730_1_+1  |
| Chaf1a   | 1.586  | 1.452  | 3.769  | 3.556  | 4.221  | 3.386  | 3.353  | 3.048  | 2.264  | 1.483  | 27221 | CHAF1A   | NM_013733_17_+1 |
| Trp53bp1 | 3.861  | 3.183  | 1.762  | 3.282  | 2.969  | 4.079  | 3.226  | 3.770  | 2.106  | 3.060  | 27223 | TP53BP1  | NM_013735_2_-1  |
| Tceb3    | 5.863  | 5.731  | 7.473  | 7.075  | 6.642  | 6.278  | 6.718  | 6.406  | 7.368  | 6.802  | 27224 | TCEB3    | NM_013736_4_-1  |
| Pla2g7   | 3.814  | 1.233  | 6.339  | 6.113  | 7.577  | 8.387  | 8.776  | 9.221  | 9.981  | 10.514 | 27226 | PLA2G7   | NM_013737_17_+1 |
| Plek2    | -3.189 | -3.408 | -2.351 | 0.461  | -3.518 | -2.219 | -3.243 | -2.041 | -4.981 | -4.981 | 27260 | PLEK2    | NM_013738_12_-1 |
| Dok3     | 1.008  | -0.998 | -0.098 | 1.601  | 1.852  | 3.132  | 5.670  | 6.298  | 8.247  | 7.888  | 27261 | DOK3     | NM_013739_13_-1 |
| Cars     | 0.694  | -4.245 | 0.976  | 2.363  | 0.722  | 0.330  | 1.119  | 1.595  | 1.984  | 1.299  | 27267 | CARS     | NM_013742_7_-1  |

|           |        |        |        |        |        |        |        |        |        |        |        |           |                 |
|-----------|--------|--------|--------|--------|--------|--------|--------|--------|--------|--------|--------|-----------|-----------------|
| Pdk4      | -4.981 | -4.981 | -4.642 | -4.461 | -4.170 | -4.347 | -4.374 | -4.477 | -4.981 | -4.981 | 27273  | PDK4      | NM_013743_6_-1  |
| Nufip1    | 5.425  | 5.254  | 5.587  | 5.563  | 5.243  | 5.116  | 5.269  | 4.848  | 4.754  | 4.600  | 27275  | NUFIP1    | NM_013745_14_+1 |
| Plekhhb1  | -4.650 | -4.837 | -4.968 | -4.979 | -4.979 | -4.981 | -4.981 | -4.981 | -4.960 | -4.976 | 27276  | PLEKHHB1  | NM_013746_7_-1  |
| Golga5    | 1.857  | 2.145  | 4.138  | 3.454  | 3.698  | 3.631  | 3.764  | 3.762  | 4.971  | 5.012  | 27277  | GOLGA5    | NM_013747_12_+1 |
| Clnk      | 0.088  | -4.981 | 4.960  | 4.440  | -4.642 | -1.071 | -1.984 | -0.115 | -4.981 | -4.227 | 27278  | CLNK      | NM_013748_5_-1  |
| Tnfrsf12a | 2.174  | 3.099  | 1.940  | 1.791  | 2.096  | 2.140  | 3.205  | 2.961  | 2.997  | 2.735  | 27279  | TNFRSF12A | NM_013749_17_-1 |
| Phlda3    | -0.831 | 0.646  | 0.632  | 1.035  | 1.285  | 1.166  | 2.190  | 2.415  | 1.242  | 1.008  | 27280  | PHLDA3    | NM_013750_1_+1  |
| Nbn       | 4.592  | 4.979  | 4.770  | 4.823  | 5.372  | 5.260  | 5.273  | 4.978  | 4.453  | 4.513  | 27354  | NBN       | NM_013752_4_+1  |
| Pald1     | -1.718 | -3.408 | -4.165 | -2.623 | 0.024  | 0.496  | 1.160  | 1.096  | -1.119 | -2.488 | 27355  | PALD1     | NM_013753_10_-1 |
| Insl6     | 2.515  | 1.643  | 2.365  | 3.103  | 2.668  | 2.970  | 2.360  | 2.330  | -1.028 | -0.598 | 27356  | INSL6     | NM_013754_19_-1 |
| Gyg       | 5.021  | 4.975  | 5.905  | 5.904  | 5.439  | 5.046  | 5.912  | 5.890  | 7.324  | 7.251  | 27357  | GYG1      | NM_013755_3_-1  |
| Sytl4     | -4.928 | -4.981 | -4.974 | -3.410 | -4.018 | -4.917 | -4.975 | -4.208 | -0.768 | -1.364 | 27359  | SYTL4     | NM_013757_X_-1  |
| Add3      | 2.632  | 2.503  | 4.565  | 6.259  | 5.432  | 5.117  | 5.090  | 3.993  | 4.420  | 1.910  | 27360  | ADD3      | NM_013758_19_+1 |
| Msrb1     | 2.327  | 1.856  | 2.968  | 3.151  | 2.598  | 3.240  | 5.326  | 5.599  | 7.732  | 7.714  | 27361  | MSRB1     | NM_013759_17_+1 |
| Dnajb9    | 5.654  | 5.674  | 4.995  | 4.871  | 4.502  | 4.752  | 4.811  | 4.957  | 4.514  | 5.413  | 27362  | DNAJB9    | NM_013760_12_-1 |
| Srr       | 3.748  | 3.316  | 1.636  | 2.302  | 1.449  | 2.264  | 1.951  | 2.420  | 2.596  | 2.687  | 27364  | SRR       | NM_013761_11_-1 |
| Rpl3      | 10.007 | 9.547  | 10.455 | 10.066 | 10.074 | 9.524  | 10.063 | 9.783  | 9.342  | 9.136  | 27367  | RPL3      | NM_013762_15_-1 |
| Tbl2      | 3.037  | 2.862  | 3.122  | 3.083  | 3.083  | 2.792  | 3.032  | 3.395  | 3.781  | 3.878  | 27368  | TBL2      | NM_013763_5_+1  |
| Dguok     | 6.536  | 6.621  | 5.617  | 5.451  | 6.065  | 5.965  | 6.150  | 5.587  | 5.210  | 4.805  | 27369  | DGUOK     | NM_013764_6_-1  |
| Rps26     | 7.732  | 7.569  | 8.698  | 8.539  | 8.046  | 8.037  | 8.314  | 8.212  | 7.089  | 6.957  | 27370  | RPS26     | NM_013765_10_-1 |
| Csnk1e    | 4.284  | 4.083  | 4.433  | 4.441  | 4.707  | 5.461  | 4.995  | 4.799  | 5.667  | 5.167  | 27373  | CSNK1E    | NM_013767_15_-1 |
| Prmt5     | 4.481  | 4.639  | 4.312  | 4.662  | 4.266  | 4.503  | 4.216  | 4.570  | 3.577  | 3.845  | 27374  | PRMT5     | NM_013768_14_-1 |
| Tjp3      | -0.696 | -4.177 | 0.585  | 1.714  | 1.508  | 1.609  | -0.034 | -2.180 | -0.306 | -4.611 | 27375  | TJP3      | NM_013769_10_-1 |
| Slc25a10  | 3.472  | 2.823  | 5.430  | 5.991  | 4.922  | 4.740  | 5.232  | 4.953  | 3.962  | 3.574  | 27376  | SLC25A10  | NM_013770_11_+1 |
| Yme1l1    | 5.234  | 5.409  | 5.739  | 5.641  | 5.602  | 5.535  | 5.478  | 5.517  | 5.179  | 5.664  | 27377  | YME1L1    | NM_013771_2_+1  |
| Akr1c12   | 0.450  | 0.411  | -0.622 | -0.463 | -1.824 | -3.417 | -0.917 | -1.756 | -2.260 | -0.866 | 622402 | NA        | NM_013777_13_-1 |
| Akr1c13   | 3.544  | 3.931  | 2.086  | 3.258  | 2.120  | 2.121  | 3.258  | 3.510  | 3.972  | 4.427  | 27384  | NA        | NM_013778_13_+1 |
| Sh2d3c    | 5.812  | 5.923  | 5.895  | 5.908  | 6.335  | 6.429  | 6.061  | 5.951  | 6.575  | 6.133  | 27387  | SH2D3C    | NM_013781_2_+1  |
| Ptdss2    | 3.691  | 3.991  | 3.198  | 3.757  | 3.924  | 4.269  | 3.471  | 4.185  | 3.423  | 3.700  | 27388  | PTDSS2    | NM_013782_7_+1  |
| Mmel1     | -2.948 | -1.523 | -4.986 | -2.268 | -4.974 | -4.086 | -4.848 | -1.584 | -4.981 | -0.973 | 27390  | MMEL1     | NM_013783_4_+1  |
| Pign      | 3.346  | 3.082  | 4.483  | 4.001  | 3.556  | 3.530  | 3.780  | 3.610  | 3.845  | 4.014  | 27392  | PIGN      | NM_013784_1_-1  |
| Ip6k1     | 5.287  | 5.469  | 5.521  | 5.451  | 5.997  | 6.076  | 6.043  | 6.284  | 7.114  | 7.147  | 27399  | IP6K1     | NM_013785_9_+1  |
| Skp2      | 1.333  | 1.520  | 1.724  | 2.435  | 2.745  | 2.330  | 1.723  | 2.791  | 2.334  | 2.699  | 27401  | SKP2      | NM_013787_15_-1 |
| Peg12     | -1.511 | -0.190 | -1.553 | -0.590 | -0.979 | 0.127  | -1.562 | -1.239 | -2.329 | -1.126 | 27412  | NA        | NM_013788_7_-1  |
| Sergef    | 4.330  | 4.630  | 3.726  | 3.569  | 3.538  | 3.525  | 3.649  | 3.550  | 3.717  | 3.535  | 27414  | SERGEF    | NM_013789_7_-1  |
| Abcc5     | 1.395  | 1.699  | 1.602  | 2.474  | 2.407  | 2.485  | 3.511  | 4.011  | 5.977  | 6.089  | 27416  | ABCC5     | NM_013790_16_-1 |
| Mkln1     | 5.465  | 5.568  | 5.812  | 5.845  | 6.122  | 5.985  | 6.090  | 6.068  | 6.317  | 6.605  | 27418  | MKLN1     | NM_013791_6_+1  |
| Naglu     | 4.596  | 4.806  | 4.571  | 4.927  | 3.778  | 4.015  | 4.081  | 4.464  | 4.950  | 4.790  | 27419  | NAGLU     | NM_013792_11_+1 |
| Klra15    | -4.981 | -1.168 | -4.281 | -4.606 | -4.924 | -4.227 | -4.950 | -4.928 | -4.981 | -4.981 | 27423  | NA        | NM_013793_6_-1  |
| Atp5l     | 8.461  | 8.363  | 8.499  | 8.315  | 8.393  | 8.389  | 8.673  | 8.318  | 7.723  | 7.548  | 27425  | ATP5L     | NM_013795_9_-1  |
| Nagpa     | 5.554  | 5.223  | 5.382  | 5.386  | 5.826  | 5.703  | 5.940  | 5.850  | 6.248  | 5.794  | 27426  | NAGPA     | NM_013796_16_-1 |
| Ate1      | 4.353  | 4.001  | 3.995  | 4.188  | 4.442  | 4.658  | 4.146  | 3.950  | 3.891  | 3.999  | 11907  | ATE1      | NM_013799_7_-1  |
| Barx2     | -4.981 | -4.981 | -3.099 | -2.836 | -4.981 | -4.981 | -4.981 | -4.981 | -4.981 | -4.981 | 12023  | BARX2     | NM_013800_9_-1  |
| Casr      | -4.981 | -4.981 | -0.364 | -0.319 | -2.068 | -3.498 | -3.856 | -4.067 | -4.981 | -4.981 | 12374  | CASR      | NM_013803_16_-1 |
| Cldn5     | -0.923 | -2.583 | -3.860 | -2.109 | -3.708 | -1.745 | -4.922 | -0.395 | -1.533 | -2.580 | 12741  | CLDN5     | NM_013805_16_+1 |
| Abcc2     | -2.573 | -4.981 | -1.973 | -4.444 | -3.368 | -4.559 | -2.377 | -4.947 | -0.164 | -4.981 | 12780  | ABCC2     | NM_013806_19_+1 |
| Plk3      | 1.531  | 1.444  | 3.022  | 3.408  | 4.687  | 5.092  | 4.402  | 3.896  | 3.130  | 3.169  | 12795  | PLK3      | NM_013807_4_-1  |
| Csrp3     | -4.981 | -4.981 | -4.932 | -4.551 | -4.853 | -4.928 | -3.753 | -4.774 | -4.981 | -4.981 | 13009  | CSR3      | NM_013808_7_-1  |
| Dbnl      | 6.625  | 6.891  | 6.982  | 7.501  | 6.728  | 7.150  | 6.309  | 6.465  | 6.733  | 6.433  | 13169  | DBNL      | NM_013810_11_+1 |
| Dnah8     | 0.581  | 1.817  | -3.242 | -0.508 | -0.641 | 0.743  | -1.099 | 0.961  | -0.713 | 2.156  | 13417  | DNAH8     | NM_013811_17_+1 |
| Cdk2ap1   | 7.388  | 7.099  | 7.070  | 7.070  | 7.332  | 7.076  | 7.074  | 7.032  | 6.658  | 6.497  | 13445  | CDK2AP1   | NM_013812_5_-1  |
| Epb41l3   | 0.434  | -0.629 | 1.349  | 0.873  | 2.550  | 1.417  | 2.235  | 2.385  | 0.233  | 0.117  | 13823  | EPB41L3   | NM_013813_17_+1 |
| Galnt1    | 2.867  | 2.014  | 1.395  | 2.479  | 2.264  | 3.473  | 2.127  | 0.641  | 2.404  | 2.082  | 14423  | GALNT1    | NM_013814_18_+1 |
| Baz1a     | 6.736  | 6.644  | 8.118  | 7.721  | 8.241  | 7.869  | 7.444  | 7.059  | 6.508  | 6.537  | 217578 | BAZ1A     | NM_013815_12_-1 |
| Gtpbp1    | 4.960  | 4.578  | 5.776  | 5.506  | 6.506  | 5.675  | 5.854  | 4.813  | 5.673  | 4.784  | 14904  | GTPBP1    | NM_013818_15_+1 |
| H2-M3     | 8.492  | 8.179  | 7.475  | 7.476  | 7.905  | 8.022  | 7.473  | 7.432  | 6.301  | 5.739  | 14991  | HLA-G     | NM_013819_17_+1 |
| Hk2       | 2.177  | 0.958  | 5.415  | 4.892  | 6.066  | 5.667  | 6.554  | 5.832  | 6.037  | 5.558  | 15277  | HK2       | NM_013820_6_-1  |
| Jag1      | -0.711 | -0.982 | 2.451  | 3.158  | 4.150  | 4.766  | 1.595  | 2.537  | -0.589 | 2.856  | 16449  | JAG1      | NM_013822_2_-1  |
| Kl        | -4.981 | -4.981 | -4.550 | -4.793 | -3.330 | -2.431 | -4.954 | -2.944 | -4.981 | -4.981 | 16591  | KL        | NM_013823_5_+1  |
| Ly75      | -1.221 | -2.583 | 6.526  | 6.377  | 3.518  | 3.821  | 2.170  | 2.758  | 1.117  | 1.278  | 17076  | LY75      | NM_013825_2_-1  |
| Mocs2     | 6.004  | 6.271  | 4.270  | 4.362  | 4.488  | 4.546  | 4.566  | 4.567  | 4.242  | 4.394  | 17434  | MOC2      | NM_013826_13_+1 |
| Mtf2      | 4.553  | 4.283  | 4.099  | 4.037  | 4.295  | 4.185  | 4.440  | 4.383  | 3.588  | 3.714  | 17765  | MTF2      | NM_013827_5_+1  |
| Plcb4     | 1.786  | 1.849  | 4.522  | 4.459  | 1.063  | 1.133  | 0.605  | 1.108  | -0.590 | 0.079  | 18798  | PLCB4     | NM_013829_2_+1  |
| Prpf4b    | 6.359  | 6.382  | 6.634  | 6.339  | 6.601  | 6.777  | 6.857  | 6.666  | 5.925  | 6.300  | 19134  | PRPF4B    | NM_013830_13_+1 |
| Pstpip2   | 0.586  | 0.286  | 4.700  | 5.178  | 4.543  | 4.119  | 4.936  | 5.126  | 7.128  | 7.149  | 19201  | PSTPIP2   | NM_013831_18_+1 |
| Rasal1    | -0.089 | -4.981 | 0.002  | 0.634  | 2.602  | 2.961  | -0.017 | 0.571  | -4.981 | -4.981 | 19415  | RASAL1    | NM_013832_5_+1  |
| Sfrp1     | -3.189 | -4.981 | -4.971 | -4.971 | -4.981 | -4.981 | -4.963 | -4.949 | -4.394 | -4.981 | 20377  | SFRP1     | NM_013834_8_+1  |
| Trove2    | 2.705  | 3.316  | 2.260  | 2.451  | 2.233  | 2.517  | 1.883  | 2.812  | 2.567  | 3.052  | 20822  | TROVE2    | NM_013835_1_-1  |
| Tcf20     | 3.374  | 2.947  | 3.331  | 3.375  | 3.914  | 4.191  | 3.641  | 3.273  | 3.448  | 3.450  | 21411  | TCF20     | NM_013836_15_-1 |
| Tpst1     | 0.852  | 0.313  | 3.109  | 3.032  | 1.353  | 2.244  | 2.898  | 3.065  | 2.632  | 2.670  | 22021  | TPST1     | NM_013837_5_+1  |
| Nr1h3     | 0.940  | -4.182 | -0.884 | 0.615  | 0.349  | -0.142 | 2.855  | 3.680  | 0.909  | 1.783  | 22259  | NR1H3     | NM_013839_2_-1  |
| Uxt       | 6.090  | 5.863  | 5.019  | 4.903  | 4.847  | 4.822  | 5.049  | 4.636  | 3.836  | 3.526  | 22294  | UXT       | NM_013840_X_-1  |
| Vps45     | 5.097  | 4.875  | 4.599  | 4.702  | 4.480  | 4.377  | 4.141  | 4.407  | 4.128  | 4.462  | 22365  | VPS45     | NM_013841_3_-1  |
| Xbp1      | 9.371  | 9.466  | 7.088  | 7.370  | 6.657  | 6.932  | 7.295  | 8.516  | 8.504  | 8.992  | 22433  | XBP1      | NM_013842_11_+1 |

|          |        |        |        |        |        |        |        |        |        |        |        |          |                  |
|----------|--------|--------|--------|--------|--------|--------|--------|--------|--------|--------|--------|----------|------------------|
| Zfp53    | 5.100  | 4.354  | 4.872  | 4.283  | 5.117  | 4.886  | 5.526  | 5.264  | 4.553  | 4.793  | 24132  | NA       | NM_013843_17_+_1 |
| Zfp68    | 5.200  | 4.776  | 4.729  | 3.981  | 4.927  | 4.442  | 4.773  | 4.334  | 4.119  | 4.701  | 24135  | NA       | NM_013844_5_-_1  |
| Ror1     | -1.987 | -2.349 | -0.949 | -2.586 | -0.509 | -1.901 | -1.992 | -3.860 | -4.981 | -4.981 | 26563  | ROR1     | NM_013845_4_+_1  |
| Gcat     | 3.350  | 3.217  | 3.819  | 3.773  | 2.752  | 2.446  | 2.667  | 2.582  | -0.105 | 1.148  | 26912  | GCAT     | NM_013847_15_+_1 |
| Ermap    | 0.644  | 1.739  | -0.642 | 3.045  | 0.134  | 3.447  | 0.728  | 3.701  | -1.178 | 1.797  | 27028  | ERMAP    | NM_013848_4_-_1  |
| Abca7    | 4.535  | 4.357  | 4.979  | 4.759  | 5.722  | 5.406  | 6.133  | 5.955  | 7.520  | 7.515  | 27403  | ABCA7    | NM_013850_10_+_1 |
| Abca8b   | -2.501 | 0.162  | -4.967 | -3.691 | -1.185 | -1.422 | -1.696 | -3.024 | 0.381  | -3.855 | 27404  | ABCA8    | NM_013851_11_-_1 |
| Abcf3    | 4.861  | 5.169  | 4.908  | 5.065  | 5.338  | 5.489  | 5.168  | 5.278  | 5.328  | 5.431  | 27406  | ABCF3    | NM_013852_16_+_1 |
| Abcf2    | 4.803  | 5.310  | 5.444  | 5.901  | 5.701  | 5.803  | 5.443  | 5.499  | 5.490  | 5.285  | 27407  | ABCF2    | NM_013853_5_-_1  |
| Abcf1    | 6.285  | 6.243  | 5.980  | 6.082  | 6.081  | 6.089  | 6.410  | 6.293  | 6.146  | 5.902  | 224742 | ABCF1    | NM_013854_17_-_1 |
| Abca3    | 3.594  | 3.665  | 5.494  | 6.054  | 5.190  | 5.139  | 5.236  | 5.094  | 6.055  | 6.146  | 27410  | ABCA3    | NM_013855_17_+_1 |
| Znhit2   | 6.181  | 5.958  | 4.834  | 4.825  | 4.437  | 4.471  | 4.360  | 4.267  | 4.450  | 3.984  | 29805  | ZNHIT2   | NM_013859_19_+_1 |
| Limd1    | 6.345  | 6.555  | 7.215  | 6.973  | 7.187  | 6.958  | 7.066  | 7.005  | 7.622  | 7.637  | 29806  | LIMD1    | NM_013860_9_+_1  |
| Tpk1     | 4.253  | 4.298  | 4.884  | 5.032  | 4.030  | 4.226  | 3.438  | 3.553  | 2.670  | 2.482  | 29807  | TPK1     | NM_013861_6_-_1  |
| Rabgap1l | 8.512  | 8.907  | 6.251  | 6.403  | 4.619  | 4.732  | 4.171  | 4.425  | 3.340  | 3.506  | 29809  | RABGAP1L | NM_013862_1_-_1  |
| Bag3     | 0.700  | 0.706  | 2.815  | 2.986  | 2.768  | 2.220  | 3.944  | 3.079  | 5.071  | 4.007  | 29810  | BAG3     | NM_013863_7_+_1  |
| Ndrg2    | -4.275 | -3.842 | -3.967 | -3.455 | -4.523 | -4.830 | -2.145 | -1.835 | -4.449 | -0.788 | 29811  | NDRG2    | NM_013864_14_-_1 |
| Ndrg3    | 5.065  | 5.331  | 5.495  | 5.800  | 5.075  | 5.543  | 5.004  | 5.351  | 5.305  | 5.511  | 29812  | NDRG3    | NM_013865_2_-_1  |
| Zfp385a  | 3.422  | 3.420  | 5.192  | 4.849  | 4.879  | 4.775  | 4.902  | 4.770  | 5.109  | 5.372  | 29813  | ZNF385A  | NM_013866_15_-_1 |
| Bcar3    | 1.943  | 3.223  | -1.791 | 0.937  | -1.017 | 1.842  | 0.153  | 3.633  | -1.806 | -0.848 | 29815  | BCAR3    | NM_013867_3_+_1  |
| Tnfrsf19 | -4.981 | -4.981 | -4.981 | -4.981 | -4.941 | -4.485 | -4.977 | -3.936 | -4.981 | -4.981 | 29820  | TNFRSF19 | NM_013869_14_-_1 |
| Smtn     | 1.779  | 2.594  | 0.333  | 0.753  | 0.244  | -1.093 | 0.168  | -0.209 | 2.947  | 1.916  | 29856  | SMTN     | NM_013870_11_-_1 |
| Mapk12   | -2.483 | -2.587 | -3.156 | -3.670 | 1.845  | 2.186  | -0.105 | -1.252 | -3.373 | -3.853 | 29857  | MAPK12   | NM_013871_15_-_1 |
| Pmm1     | 3.782  | 2.874  | 2.313  | 1.531  | 2.835  | 2.242  | 2.531  | 2.523  | 2.759  | 1.952  | 29858  | PMM1     | NM_013872_15_-_1 |
| Sult4a1  | -4.981 | -4.981 | -2.815 | -1.664 | -2.557 | -0.638 | -2.257 | -3.291 | -4.981 | -4.981 | 29859  | SULT4A1  | NM_013873_15_-_1 |
| Dpf1     | -4.981 | -4.981 | -3.350 | -2.875 | -3.017 | -3.296 | -4.976 | -4.803 | -4.981 | -4.981 | 29861  | DPF1     | NM_013874_7_+_1  |
| Pde7b    | -1.611 | -1.620 | -2.200 | -1.878 | -1.379 | -0.666 | -0.126 | -0.024 | 2.251  | 1.418  | 29863  | PDE7B    | NM_013875_10_-_1 |
| Rnf11    | 5.573  | 5.972  | 5.687  | 5.946  | 5.344  | 5.558  | 5.214  | 5.263  | 5.173  | 5.712  | 29864  | RNF11    | NM_013876_4_-_1  |
| Plcl2    | 3.513  | 3.655  | 4.727  | 5.311  | 5.561  | 5.431  | 5.345  | 5.163  | 6.354  | 6.402  | 224860 | PLCL2    | NM_013880_17_+_1 |
| Ulk2     | 5.029  | 4.727  | 4.620  | 4.211  | 4.746  | 4.728  | 4.756  | 4.478  | 5.039  | 5.555  | 29869  | ULK2     | NM_013881_11_-_1 |
| Gtse1    | -1.596 | -2.797 | 0.267  | 0.446  | 0.832  | 0.468  | -0.234 | -0.362 | 0.446  | -2.256 | 29870  | GTSE1    | NM_013882_15_+_1 |
| Scmh1    | 2.884  | 3.417  | 3.804  | 4.393  | 3.556  | 4.170  | 3.254  | 3.726  | 4.016  | 4.341  | 29871  | SCMH1    | NM_013883_4_+_1  |
| Cspg5    | -2.552 | -0.270 | -4.839 | -3.280 | -3.820 | -3.559 | -4.148 | -3.870 | -4.981 | -4.981 | 29873  | CSPG5    | NM_013884_9_+_1  |
| Clic4    | 6.685  | 6.609  | 8.379  | 8.506  | 7.894  | 8.007  | 7.687  | 7.420  | 5.918  | 5.928  | 29876  | CLIC4    | NM_013885_4_-_1  |
| Hdgfrp3  | -0.265 | -1.316 | 2.868  | 2.218  | 2.018  | 2.425  | 2.821  | 2.749  | 3.678  | 4.076  | 29877  | HDGFRP3  | NM_013886_7_-_1  |
| Dnajc12  | 0.827  | 1.527  | 1.247  | 1.683  | 1.491  | 2.460  | 1.838  | 1.677  | 1.107  | 1.943  | 30045  | DNAJC12  | NM_013888_10_+_1 |
| Zfp292   | 5.204  | 5.563  | 5.542  | 5.217  | 5.753  | 5.747  | 5.412  | 5.496  | 5.074  | 5.331  | 30046  | ZNF292   | NM_013889_4_-_1  |
| Fbxw2    | 4.894  | 4.513  | 4.385  | 4.677  | 4.387  | 4.066  | 4.797  | 5.141  | 5.562  | 5.393  | 30050  | FBXW2    | NM_013890_2_-_1  |
| Timm13   | 7.368  | 7.279  | 6.524  | 6.468  | 6.499  | 6.654  | 6.709  | 6.594  | 5.710  | 5.664  | 30055  | TIMM13   | NM_013895_10_-_1 |
| Timm9    | 2.178  | 2.283  | 0.608  | 0.826  | 0.543  | 1.554  | 1.193  | 1.339  | 0.665  | 0.306  | 30056  | TIMM9    | NM_013896_12_-_1 |
| Timm8b   | 6.396  | 6.303  | 6.020  | 6.083  | 5.842  | 5.920  | 6.163  | 6.004  | 5.128  | 4.940  | 30057  | TIMM8B   | NM_013897_9_+_1  |
| Timm8a1  | 4.218  | 4.576  | 4.197  | 4.458  | 4.057  | 4.154  | 4.292  | 4.415  | 2.925  | 2.745  | 30058  | TIMM8A   | NM_013898_X_-_1  |
| Timm10   | 5.779  | 5.333  | 4.793  | 4.565  | 4.697  | 4.645  | 4.885  | 4.507  | 3.540  | 3.076  | 30059  | TIMM10   | NM_013899_2_+_1  |
| Slc39a1  | 3.312  | 3.119  | 3.131  | 2.911  | 2.701  | 2.792  | 2.973  | 2.678  | 2.685  | 3.089  | 30791  | SLC39A1  | NM_013901_3_+_1  |
| Fkbp3    | 7.328  | 7.171  | 6.356  | 6.353  | 6.729  | 6.446  | 6.541  | 6.248  | 4.857  | 4.696  | 30795  | FKBP3    | NM_013902_12_-_1 |
| Mmp20    | -4.981 | -4.981 | -3.872 | -2.838 | -3.892 | -3.941 | -4.977 | -4.974 | -4.981 | -4.981 | 30800  | MMP20    | NM_013903_9_+_1  |
| Hey2     | -4.981 | -4.981 | -4.041 | -4.881 | -4.934 | -4.934 | -4.125 | -4.664 | -4.190 | -4.981 | 15214  | HEY2     | NM_013904_10_-_1 |
| Adamts8  | -4.981 | -4.981 | -3.892 | -4.913 | -4.011 | -4.994 | -4.966 | -4.936 | -3.750 | -4.981 | 30806  | ADAMTS8  | NM_013906_9_+_1  |
| Fbxw4    | 5.327  | 5.189  | 2.685  | 2.593  | 3.693  | 3.809  | 3.765  | 3.776  | 4.744  | 4.989  | 30838  | FBXW4    | NM_013907_19_-_1 |
| Fbxw5    | 4.768  | 4.424  | 5.052  | 4.828  | 5.446  | 5.261  | 5.410  | 5.143  | 6.243  | 5.731  | 30839  | FBXW5    | NM_013908_2_+_1  |
| Fbxl6    | 5.373  | 5.350  | 5.206  | 5.129  | 5.218  | 5.240  | 5.161  | 5.109  | 5.289  | 4.994  | 30840  | FBXL6    | NM_013909_15_-_1 |
| Kdm2b    | 3.937  | 4.245  | 4.542  | 4.417  | 4.433  | 4.178  | 4.478  | 4.122  | 4.675  | 4.462  | 30841  | KDM2B    | NM_013910_5_-_1  |
| Fbxl12   | 0.540  | 1.035  | 0.572  | 0.539  | 0.262  | 1.063  | -0.275 | 0.149  | 1.539  | 2.032  | 30843  | FBXL12   | NM_013911_9_-_1  |
| Apln     | -4.981 | -1.423 | -2.041 | -2.232 | -2.043 | -3.103 | -2.790 | -2.781 | -1.350 | -2.609 | 30878  | APLN     | NM_013912_X_-_1  |
| Angptl3  | 2.043  | 2.260  | -3.489 | -3.900 | -2.942 | -2.279 | -2.104 | -1.726 | -3.351 | -2.031 | 30924  | ANGPTL3  | NM_013913_4_+_1  |
| Snai3    | 2.026  | 1.478  | -4.978 | -2.954 | -1.967 | -2.019 | -3.748 | -4.160 | -3.750 | -4.981 | 30927  | SNAI3    | NM_013914_8_-_1  |
| Zbtb18   | -0.878 | -0.562 | -1.953 | -2.512 | 0.664  | 0.648  | -0.303 | -1.727 | 0.421  | 1.025  | 30928  | ZBTB18   | NM_013915_1_+_1  |
| Pttg1    | 3.466  | 1.508  | 2.990  | 0.124  | 3.382  | 1.295  | 3.144  | 1.193  | 2.734  | 0.145  | 30939  | PTTG1    | NM_013917_11_-_1 |
| Usp25    | 5.966  | 5.890  | 6.274  | 6.142  | 6.392  | 6.157  | 6.468  | 6.395  | 7.584  | 7.409  | 30940  | USP25    | NM_013918_16_+_1 |
| Usp21    | 4.946  | 5.538  | 4.897  | 5.604  | 5.060  | 5.779  | 5.135  | 5.987  | 5.228  | 6.159  | 30941  | USP21    | NM_013919_1_-_1  |
| Prss30   | 6.631  | 6.244  | 5.857  | 5.256  | 6.597  | 5.972  | 5.354  | 4.305  | -0.989 | 0.194  | 30943  | NA       | NM_013921_17_-_1 |
| Zfp354c  | -0.024 | -0.175 | -0.980 | -1.940 | -1.702 | -0.611 | -3.265 | -2.289 | -1.312 | -0.782 | 30944  | ZNF354C  | NM_013922_11_-_1 |
| Rnf19a   | 3.698  | 4.134  | 4.493  | 4.289  | 3.730  | 3.879  | 4.056  | 4.075  | 4.479  | 4.759  | 30945  | RNF19A   | NM_013923_15_-_1 |
| Abt1     | 5.765  | 5.452  | 4.768  | 5.036  | 5.111  | 5.199  | 4.624  | 4.904  | 4.545  | 4.354  | 30946  | ABT1     | NM_013924_13_-_1 |
| Adat1    | 2.541  | 1.897  | 1.301  | 1.098  | 1.867  | 1.851  | 1.693  | 1.785  | 1.538  | 1.209  | 30947  | ADAT1    | NM_013925_8_-_1  |
| Cbx8     | 3.224  | 2.933  | 3.078  | 3.150  | 3.317  | 3.619  | 2.967  | 3.075  | 3.502  | 3.578  | 30951  | CBX8     | NM_013926_11_-_1 |
| Schip1   | -4.981 | -4.490 | -4.834 | -0.823 | -4.954 | -4.954 | -4.973 | -4.969 | -4.584 | -4.911 | 30953  | SCHIP1   | NM_013928_3_+_1  |
| Siva1    | 5.907  | 5.256  | 5.023  | 4.949  | 5.092  | 5.019  | 5.789  | 5.772  | 5.925  | 5.221  | 30954  | SIVA1    | NM_013929_12_+_1 |
| Mapk8ip3 | 1.255  | 1.753  | 1.387  | 1.843  | 1.131  | 1.955  | 2.729  | 0.996  | 1.980  | 2.514  | 30957  | MAPK8IP3 | NM_013931_17_-_1 |
| Ddx25    | -0.417 | -4.981 | -3.207 | -4.973 | -2.574 | -4.350 | -2.640 | -2.915 | -4.981 | -4.981 | 30959  | DDX25    | NM_013932_9_-_1  |
| Vapa     | 7.523  | 7.444  | 7.370  | 7.220  | 7.313  | 7.104  | 7.317  | 7.287  | 7.717  | 7.566  | 30960  | VAPA     | NM_013933_17_-_1 |
| Hacd1    | -2.309 | -4.981 | -4.907 | -4.974 | -4.961 | -4.961 | -2.761 | -3.414 | -4.963 | -2.657 | 30963  | HACD1    | NM_013935_2_-_1  |
| Cacna1s  | 4.226  | 1.989  | 5.563  | 5.556  | 4.807  | 4.851  | 2.810  | 2.877  | -4.072 | -3.480 | 12292  | CACNA1S  | NM_014193_1_+_1  |
| Klra7    | -0.877 | -1.043 | -1.124 | -1.301 | -4.865 | -3.527 | -0.940 | -1.203 | -2.263 | -4.981 | 16638  | NA       | NM_014194_6_-_1  |

|          |        |        |        |        |        |        |        |        |        |        |           |                 |                 |
|----------|--------|--------|--------|--------|--------|--------|--------|--------|--------|--------|-----------|-----------------|-----------------|
| Slc33a1  | 5.187  | 4.964  | 5.782  | 5.318  | 4.037  | 3.558  | 3.953  | 4.207  | 4.725  | 4.956  | 11416     | SLC33A1         | NM_015728_3_-1  |
| Acox1    | 3.935  | 3.813  | 4.468  | 4.342  | 3.859  | 4.172  | 3.918  | 4.002  | 4.411  | 4.630  | 11430     | ACOX1           | NM_015729_11_-1 |
| Atp9a    | -3.231 | 1.972  | -3.785 | -4.582 | -4.273 | -0.253 | -3.726 | -2.577 | -4.300 | -4.330 | 11981     | ATP9A           | NM_015731_2_-1  |
| Axin2    | -4.981 | -4.981 | -3.697 | -3.049 | -1.938 | -1.500 | -2.850 | -2.064 | -4.981 | -3.853 | 12006     | AXIN2           | NM_015732_11_+1 |
| Casp9    | 3.362  | 3.854  | 5.318  | 5.326  | 4.421  | 4.625  | 4.829  | 5.120  | 5.664  | 6.063  | 12371     | CASP9           | NM_015733_4_+1  |
| Col5a1   | -1.031 | -1.409 | -4.537 | 0.251  | -1.895 | 0.206  | -2.690 | 1.160  | 0.041  | -1.667 | 12831     | COL5A1          | NM_015734_2_+1  |
| Ddb1     | 4.897  | 4.759  | 6.066  | 6.194  | 5.948  | 5.822  | 5.745  | 6.147  | 6.618  | 6.923  | 13194     | DDB1            | NM_015735_19_+1 |
| Galnt3   | 0.192  | -0.237 | 0.325  | 1.696  | 0.248  | -0.134 | 0.581  | 1.818  | 0.588  | 1.499  | 14425     | GALNT3          | NM_015736_2_-1  |
| Galnt4   | 2.290  | 2.676  | 2.473  | 2.329  | 2.785  | 2.513  | 2.949  | 3.190  | 4.284  | 4.650  | 14426     | GALNT4          | NM_015737_10_+1 |
| Gbx1     | -4.981 | -4.981 | -4.981 | -4.981 | -2.474 | -4.595 | -4.310 | -4.789 | -4.981 | -4.981 | 231044    | GBX1            | NM_015739_5_-1  |
| Bloc1s1  | 7.623  | 7.408  | 6.472  | 6.459  | 6.464  | 6.599  | 6.792  | 6.451  | 6.279  | 6.017  | 14533     | BLOC1S1         | NM_015740_10_-1 |
| Myo9b    | 4.061  | 4.769  | 5.524  | 5.471  | 6.655  | 6.550  | 5.985  | 5.682  | 5.912  | 5.890  | 17925     | MYO9B           | NM_015742_8_+1  |
| Nr4a3    | 2.416  | 3.657  | 4.697  | 4.373  | 5.406  | 5.705  | 3.828  | 2.607  | -0.741 | -1.027 | 18124     | NR4A3           | NM_015743_4_+1  |
| Enpp2    | -0.563 | -1.378 | -2.008 | 0.328  | 1.294  | 1.724  | -1.009 | -0.016 | -2.893 | -1.298 | 18606     | ENPP2           | NM_015744_15_-1 |
| Slc20a1  | 3.754  | 3.625  | 4.636  | 4.554  | 5.014  | 4.658  | 4.942  | 4.667  | 4.415  | 4.334  | 20515     | SLC20A1         | NM_015747_2_+1  |
| Slit1    | -1.635 | -4.981 | -4.670 | -4.753 | -4.467 | -4.928 | -4.303 | -4.813 | -2.194 | -4.981 | 20562     | SLIT1           | NM_015748_19_-1 |
| Tcn2     | 5.277  | 5.100  | 3.267  | 3.436  | 2.995  | 3.715  | 3.714  | 5.189  | 6.384  | 6.609  | 21452     | TCN2            | NM_015749_11_-1 |
| Abce1    | 5.385  | 5.723  | 6.292  | 6.499  | 6.181  | 6.215  | 6.178  | 6.470  | 5.828  | 6.109  | 24015     | ABCE1           | NM_015751_8_-1  |
| Sufu     | 2.017  | 1.275  | 1.518  | 1.097  | 1.773  | 0.698  | 2.341  | 1.805  | 3.217  | 2.924  | 24069     | SUFU            | NM_015752_19_+1 |
| Zeb2     | 6.306  | 6.564  | 3.489  | 2.881  | 5.531  | 5.470  | 6.861  | 7.358  | 8.202  | 8.685  | 24136     | ZEB2            | NM_015753_2_-1  |
| Rbbp9    | 3.785  | 3.476  | 1.709  | 1.903  | 2.280  | 2.118  | 2.791  | 3.000  | 3.629  | 3.751  | 26450     | RBBP9           | NM_015754_2_-1  |
| Hunk     | -3.090 | -2.600 | -4.011 | -1.700 | -3.600 | -3.169 | -2.948 | 0.094  | -1.971 | 1.668  | 26559     | HUNK            | NM_015755_16_+1 |
| Shroom3  | -4.447 | -4.981 | -4.644 | -4.898 | -4.942 | -4.980 | -4.970 | -4.980 | -4.783 | -4.981 | 27428     | SHROOM3         | NM_015756_5_+1  |
| Fgd3     | 2.793  | 2.944  | 4.461  | 4.454  | 4.621  | 4.642  | 3.915  | 4.071  | 4.351  | 4.261  | 30938     | FGD3            | NM_015759_13_-1 |
| Txnrd1   | -1.541 | -0.964 | 1.694  | 1.310  | 0.786  | 1.273  | 2.726  | 1.865  | 3.171  | 2.609  | 50493     | TXNRD1          | NM_015762_10_+1 |
| Lpin1    | 3.479  | 2.579  | 3.453  | 1.858  | 2.967  | 0.574  | 3.112  | 0.728  | 3.675  | 0.976  | 14245     | LPIN1           | NM_015763_12_-1 |
| Hspa14   | 5.537  | 5.948  | 5.801  | 6.062  | 6.087  | 6.050  | 5.805  | 5.858  | 5.323  | 5.310  | 50497     | HSPA14          | NM_015765_2_-1  |
| Ebi3     | 5.894  | 5.149  | 6.209  | 6.586  | 6.342  | 5.914  | 6.305  | 5.761  | 5.986  | 5.221  | 50498     | EBI3            | NM_015766_17_+1 |
| Ttpa     | -4.981 | -4.981 | -4.978 | -4.978 | -4.441 | -4.984 | -3.611 | -4.994 | -2.521 | -1.365 | 50500     | TTPA            | NM_015767_4_+1  |
| Erc4     | 4.024  | 3.941  | 4.454  | 4.209  | 4.460  | 4.629  | 4.298  | 4.293  | 4.772  | 4.549  | 50505     | ERCC4           | NM_015769_16_+1 |
| a        | -2.739 | -1.736 | -4.378 | -4.669 | -4.511 | -4.904 | -4.528 | -3.182 | -4.981 | -4.316 | 50518     | ASIP            | NM_015770_2_+1  |
| Lats2    | 4.474  | 4.913  | 4.424  | 4.277  | 3.861  | 3.142  | 5.170  | 4.944  | 6.753  | 6.739  | 50523     | LATS2           | NM_015771_14_-1 |
| Sall2    | -4.496 | -4.259 | -4.534 | -4.760 | -4.789 | -4.914 | -4.453 | -4.868 | -4.508 | -4.789 | 50524     | SALL2           | NM_015772_14_-1 |
| Ero1     | 4.417  | 4.796  | 5.896  | 5.926  | 4.980  | 5.096  | 5.120  | 5.446  | 5.830  | 5.923  | 50527     | ERO1A           | NM_015774_14_-1 |
| Tmprss2  | -4.981 | -4.981 | -3.446 | -4.888 | -4.490 | -4.904 | -4.745 | -4.101 | -2.450 | -4.342 | 50528     | TMPRSS2         | NM_015775_16_-1 |
| Elane    | -2.164 | -4.981 | -4.952 | -2.905 | -4.704 | 4.912  | -4.412 | 5.155  | 6.126  | -0.045 | 50701     | ELANE           | NM_015779_10_+1 |
| Nap11    | 6.040  | 6.231  | 7.143  | 7.173  | 7.207  | 7.478  | 6.945  | 6.724  | 5.821  | 5.580  | 53605     | NAP11           | NM_015781_10_+1 |
| Snrpa    | 5.451  | 5.339  | 5.387  | 5.665  | 5.355  | 5.133  | 4.891  | 4.841  | 4.504  | 4.411  | 53607     | NA              | NM_015782_7_-1  |
| Isg15    | 5.048  | 4.560  | 4.710  | 3.894  | 6.368  | 5.611  | 5.904  | 4.901  | 5.098  | 4.350  | 100038882 | ISG15           | NM_015783_4_-1  |
| Postn    | -4.007 | -4.786 | -4.824 | -2.057 | -4.940 | -1.983 | -3.316 | -4.702 | -4.981 | -4.791 | 50706     | POSTN           | NM_015784_3_+1  |
| Zbp      | 1.605  | 1.804  | 1.764  | 1.662  | 1.826  | 1.351  | 1.296  | 0.863  | -0.596 | 0.243  | 53604     | ZBP             | NM_015785_11_-1 |
| Hist1h1c | 4.015  | 4.892  | 4.689  | 5.102  | 4.777  | 5.342  | 4.856  | 5.019  | 4.679  | 4.782  | 50708     | HIST1H1C        | NM_015786_13_+1 |
| Hist1h1e | 3.779  | 4.289  | 4.245  | 4.493  | 5.504  | 5.397  | 4.682  | 4.598  | 4.394  | 4.010  | 50709     | NA              | NM_015787_13_-1 |
| Dkk1     | 3.502  | 3.433  | 2.458  | 2.840  | 1.614  | 2.180  | 1.448  | 2.360  | 0.324  | 0.118  | 50722     | DKK1            | NM_015789_7_-1  |
| Icosl    | 3.549  | 3.302  | 6.254  | 6.196  | 7.520  | 6.989  | 6.593  | 5.789  | 4.078  | 4.547  | 50723     | ICOSLG LOC10272 | NM_015790_10_+1 |
| Fbxo8    | 5.873  | 5.727  | 4.195  | 4.478  | 4.650  | 4.756  | 4.393  | 4.181  | 4.075  | 3.989  | 50753     | FBXO8           | NM_015791_8_+1  |
| Fbxo18   | 4.689  | 4.350  | 5.388  | 4.962  | 5.023  | 4.550  | 5.163  | 4.876  | 6.433  | 6.007  | 50755     | FBXO18          | NM_015792_2_-1  |
| Fbxl17   | 4.575  | 4.711  | 4.872  | 5.001  | 4.856  | 4.864  | 4.646  | 4.684  | 4.835  | 4.731  | 50758     | FBXL17          | NM_015794_17_-1 |
| Fbxo17   | 4.145  | 4.559  | 0.628  | 0.548  | -2.091 | -1.907 | -1.506 | -0.381 | -1.321 | 0.315  | 50760     | FBXO17          | NM_015796_7_+1  |
| Fbxo6    | 0.472  | -2.290 | 1.115  | 0.251  | 0.219  | -0.663 | 0.675  | -0.554 | 1.150  | -0.754 | 50762     | FBXO6           | NM_015797_4_-1  |
| Tfr2     | -4.981 | -4.981 | -4.875 | -4.086 | -4.619 | -4.781 | -4.665 | -4.387 | -4.764 | -4.169 | 50765     | TFR2            | NM_015799_5_+1  |
| Crim1    | -1.364 | -1.083 | 1.948  | 0.548  | -1.124 | -0.884 | 0.120  | 1.623  | 0.787  | 0.697  | 50766     | CRIM1           | NM_015800_17_+1 |
| Pnp1a6   | 2.806  | 2.005  | 2.407  | 1.468  | 1.914  | 2.058  | 2.021  | 1.485  | 2.312  | 2.222  | 50767     | PNPLA6          | NM_015801_8_+1  |
| Atp8a2   | -4.981 | -4.981 | -4.967 | -2.942 | -4.326 | -2.824 | -1.275 | -1.871 | -0.304 | -2.750 | 50769     | ATP8A2          | NM_015803_14_-1 |
| Atp11a   | 2.410  | 1.880  | 3.591  | 3.894  | 3.174  | 3.785  | 2.489  | 1.994  | 1.758  | 3.086  | 50770     | ATP11A          | NM_015804_8_+1  |
| Atp9b    | 4.398  | 4.426  | 4.813  | 4.923  | 4.812  | 4.928  | 4.854  | 4.835  | 5.417  | 5.457  | 50771     | ATP9B           | NM_015805_18_-1 |
| Mapk6    | 4.046  | 3.859  | 4.337  | 4.193  | 4.521  | 4.420  | 3.880  | 3.874  | 5.126  | 5.273  | 50772     | MAPK6           | NM_015806_9_-1  |
| Nt5c     | 7.074  | 7.119  | 6.931  | 6.963  | 6.515  | 6.480  | 6.578  | 6.558  | 6.277  | 6.149  | 50773     | NT5C            | NM_015807_11_-1 |
| Polg2    | 2.531  | 2.178  | 1.662  | 2.180  | 2.254  | 2.204  | 1.965  | 2.030  | 2.370  | 1.825  | 50776     | POLG2           | NM_015810_11_-1 |
| Rgs1     | 9.135  | 9.205  | 9.176  | 8.953  | 11.564 | 11.749 | 9.961  | 9.294  | 3.752  | 3.614  | 50778     | RGS1            | NM_015811_1_-1  |
| Dkk3     | -1.805 | -4.981 | 6.437  | 4.375  | -3.748 | -2.582 | -1.780 | -2.362 | -2.065 | -4.316 | 50781     | DKK3            | NM_015814_7_-1  |
| Lsm4     | 7.681  | 7.463  | 7.323  | 7.291  | 6.936  | 7.007  | 7.108  | 7.003  | 6.152  | 5.782  | 50783     | LSM4            | NM_015816_8_+1  |
| Plpp2    | 0.721  | 1.756  | 3.073  | 3.682  | -0.156 | 0.032  | 3.064  | 3.672  | 4.237  | 3.896  | 50784     | PLPP2           | NM_015817_10_-1 |
| Hs6st1   | 3.276  | 3.188  | 4.707  | 4.755  | 4.656  | 4.437  | 4.644  | 4.824  | 5.586  | 5.429  | 50785     | HS6ST1          | NM_015818_1_+1  |
| Hs6st2   | -4.981 | -4.981 | -3.531 | -3.564 | -2.463 | -3.017 | -4.981 | -4.861 | -4.981 | -4.981 | 50786     | HS6ST2          | NM_015819_X_-1  |
| Fbxl8    | 3.795  | 3.476  | 2.507  | 2.131  | 2.308  | 2.050  | 2.447  | 1.912  | 3.443  | 2.601  | 50788     | FBXL8           | NM_015821_8_+1  |
| Fbxl3    | 4.879  | 5.043  | 4.925  | 4.735  | 4.873  | 4.867  | 5.182  | 5.027  | 5.573  | 5.808  | 50789     | FBXL3           | NM_015822_14_-1 |
| Magi2    | -0.002 | -0.705 | -3.246 | -3.377 | -2.285 | -2.335 | -2.216 | -2.165 | -1.622 | -1.360 | 50791     | MAGI2           | NM_015823_5_+1  |
| Orc3     | 4.581  | 4.815  | 5.146  | 4.937  | 4.876  | 4.898  | 4.785  | 4.978  | 4.701  | 4.706  | 50793     | ORC3            | NM_015824_4_-1  |
| Sh3bgr   | 7.943  | 7.931  | -0.892 | -1.358 | -4.995 | -4.358 | -3.874 | -3.460 | -3.351 | -4.981 | 50795     | NA              | NM_015825_16_+1 |
| Copb2    | 6.180  | 6.144  | 6.721  | 6.784  | 6.529  | 6.465  | 6.389  | 6.726  | 7.131  | 7.148  | 50797     | COPB2           | NM_015827_9_+1  |
| Gne      | 5.092  | 3.563  | 2.304  | 1.048  | 1.543  | 1.652  | 1.589  | 0.590  | 2.017  | 1.706  | 50798     | GNE             | NM_015828_4_-1  |
| Slc25a13 | -1.299 | 0.653  | 2.727  | 2.882  | 1.429  | 1.304  | 0.384  | 1.058  | 1.780  | 2.170  | 50799     | SLC25A13        | NM_015829_6_-1  |
| Capn15   | 1.200  | 1.033  | 3.491  | 3.483  | 2.377  | 1.906  | 2.666  | 2.203  | 3.631  | 3.452  | 50817     | CAPN15          | NM_015830_17_-1 |

|         |        |        |        |        |        |        |        |        |        |        |        |         |                 |
|---------|--------|--------|--------|--------|--------|--------|--------|--------|--------|--------|--------|---------|-----------------|
| Galt    | 5.754  | 6.416  | 5.014  | 5.945  | 4.739  | 5.390  | 4.694  | 5.448  | 4.682  | 5.224  | 14430  | GALT    | NM_016658_4_+1  |
| Klra1   | -0.356 | 4.000  | -4.887 | 1.154  | -2.932 | -0.231 | -2.269 | 0.307  | -3.738 | -4.981 | 16627  | NA      | NM_016659_6_-1  |
| Hmga1   | 1.718  | -0.547 | 1.480  | 1.433  | 1.634  | 1.530  | 1.385  | 1.656  | 0.747  | 1.526  | 15361  | HMGA1   | NM_016660_17_+1 |
| Ahcy    | 3.879  | -1.597 | 4.612  | 0.119  | 3.983  | -1.355 | 3.953  | -1.247 | 3.872  | -0.605 | 269378 | AHCY    | NM_016661_2_-1  |
| Mxd3    | -0.914 | 0.218  | 2.160  | 1.828  | 3.449  | 2.820  | 2.468  | 1.108  | 0.406  | -0.415 | 17121  | MXD3    | NM_016662_13_-1 |
| Syt3    | -4.981 | -3.172 | -3.231 | -3.667 | -4.608 | -4.819 | -4.825 | -4.622 | -2.968 | -3.880 | 20981  | SYT3    | NM_016663_7_+1  |
| Stra13  | 6.564  | 6.384  | 5.753  | 5.727  | 5.839  | 5.748  | 6.208  | 6.026  | 5.405  | 5.107  | 20892  | CENPX   | NM_016665_11_-1 |
| Aip     | 3.768  | 3.149  | 3.471  | 3.793  | 1.653  | 1.648  | 2.819  | 2.139  | 3.646  | 3.058  | 11632  | AIP     | NM_016666_19_-1 |
| Sntb1   | 1.914  | 2.104  | -1.085 | -1.998 | -1.566 | -1.633 | -0.097 | -0.165 | 3.367  | 2.450  | 20649  | SNTB1   | NM_016667_15_-1 |
| Bhmt    | -4.981 | -4.981 | -4.972 | -4.972 | -1.014 | 0.979  | -4.841 | -4.977 | -4.981 | -4.981 | 12116  | BHMT    | NM_016668_13_-1 |
| Pknox1  | 2.863  | 0.773  | 2.445  | 1.868  | 4.381  | 4.261  | 3.832  | 3.282  | 4.948  | 4.325  | 18771  | PKNOX1  | NM_016670_17_+1 |
| Il27ra  | 3.488  | 3.285  | 0.678  | 2.062  | 2.851  | 3.558  | 2.389  | 4.122  | 1.426  | 2.973  | 50931  | IL27RA  | NM_016671_8_-1  |
| Ddc     | 2.004  | 1.451  | -4.273 | -3.228 | -4.985 | -4.156 | -4.538 | -1.479 | -4.981 | -4.981 | 13195  | DDC     | NM_016672_11_-1 |
| Cldn1   | -0.797 | 1.277  | 3.432  | 4.021  | 0.352  | 1.332  | 0.403  | 0.850  | -0.591 | -1.427 | 12737  | CLDN1   | NM_016674_16_-1 |
| Rab10   | 7.509  | 7.586  | 8.353  | 8.531  | 7.333  | 7.517  | 7.508  | 7.659  | 7.562  | 7.828  | 19325  | RAB10   | NM_016676_12_-1 |
| Hpcal1  | 5.891  | 5.574  | 5.507  | 4.896  | 5.397  | 4.672  | 5.960  | 5.389  | 7.010  | 6.202  | 53602  | HPCAL1  | NM_016677_12_+1 |
| Reck    | -0.189 | 0.886  | -0.889 | 2.865  | -0.886 | 0.548  | -0.537 | 0.350  | 0.094  | -1.254 | 53614  | RECK    | NM_016678_4_+1  |
| Keap1   | 1.272  | 1.333  | 2.658  | 2.366  | 2.313  | 1.320  | 2.248  | 1.350  | 3.054  | 2.138  | 50868  | KEAP1   | NM_016679_9_-1  |
| Clasrp  | 3.604  | 3.825  | 3.264  | 3.374  | 3.968  | 3.794  | 3.274  | 3.380  | 3.618  | 3.383  | 53609  | NA      | NM_016680_7_-1  |
| Chek2   | 1.904  | 1.241  | 3.009  | 3.387  | 3.422  | 3.516  | 3.294  | 3.160  | 2.291  | 2.395  | 50883  | CHEK2   | NM_016681_5_+1  |
| Uba2    | 6.351  | 6.461  | 6.507  | 6.696  | 6.631  | 6.710  | 6.519  | 6.695  | 6.682  | 6.889  | 50995  | UBA2    | NM_016682_7_-1  |
| Zkscan5 | 0.935  | 0.016  | 1.160  | 1.107  | 0.869  | -0.142 | -0.125 | -0.104 | 2.516  | 2.716  | 22757  | ZKSCAN5 | NM_016683_5_+1  |
| Zscan12 | 2.972  | 2.576  | 2.586  | 2.313  | 2.608  | 2.146  | 3.021  | 1.568  | 2.672  | 2.339  | 22758  | ZSCAN12 | NM_016684_13_+1 |
| Comp    | -2.362 | -1.814 | -1.216 | -1.725 | -2.359 | -2.622 | -0.592 | -1.615 | 1.153  | 0.130  | 12845  | COMP    | NM_016685_8_+1  |
| Vezf1   | 4.781  | 4.904  | 5.459  | 5.443  | 5.112  | 5.171  | 5.199  | 5.371  | 5.786  | 5.805  | 22344  | VEZF1   | NM_016686_11_+1 |
| Pdcd7   | 4.245  | 4.271  | 4.478  | 4.390  | 4.650  | 4.571  | 4.560  | 4.351  | 4.592  | 4.603  | 50996  | PDCD7   | NM_016688_9_+1  |
| Aqp3    | 0.383  | -0.255 | 0.912  | -0.391 | -4.422 | -1.773 | -2.209 | -0.549 | -1.712 | -4.981 | 11828  | AQP3    | NM_016689_4_-1  |
| Hnnpdl  | 7.454  | 7.235  | 6.832  | 6.696  | 7.546  | 7.341  | 7.234  | 6.812  | 6.472  | 6.124  | 50926  | HNNPDL  | NM_016690_5_-1  |
| Cln5    | 0.375  | -0.183 | -2.771 | -0.954 | -2.874 | -4.687 | -2.524 | -1.749 | -0.709 | 0.429  | 12728  | CLCN5   | NM_016691_X_-1  |
| Incenp  | 3.311  | 3.527  | 3.843  | 3.823  | 4.464  | 4.147  | 4.401  | 3.884  | 4.703  | 4.250  | 16319  | INCENP  | NM_016692_19_-1 |
| Map3k6  | -4.981 | -2.437 | -0.291 | -2.557 | -1.166 | -2.206 | 0.598  | -0.325 | 3.186  | 2.149  | 53608  | MAP3K6  | NM_016693_4_+1  |
| Park2   | -0.389 | 0.519  | -2.162 | -1.457 | -3.279 | -1.998 | -4.573 | -3.156 | -1.100 | -0.550 | 50873  | PARK2   | NM_016694_17_+1 |
| Mpp2    | -4.981 | -2.883 | -4.955 | -1.762 | -4.049 | -2.343 | -1.536 | -1.653 | -3.322 | -1.798 | 50997  | MPP2    | NM_016695_11_-1 |
| Gpc1    | 0.980  | 2.978  | 2.200  | 3.026  | 3.120  | 2.921  | 1.748  | 1.434  | 3.213  | 2.172  | 14733  | GPC1    | NM_016696_1_+1  |
| Gpc3    | -4.981 | -4.981 | -4.825 | -3.606 | -4.834 | -4.727 | -4.953 | -4.982 | -2.377 | -3.165 | 14734  | GPC3    | NM_016697_X_-1  |
| Rnf10   | 4.929  | 5.130  | 5.377  | 5.657  | 5.450  | 5.399  | 5.508  | 5.805  | 6.425  | 6.511  | 50849  | RNF10   | NM_016698_5_-1  |
| Exosc10 | 5.151  | 5.161  | 4.612  | 5.044  | 5.188  | 4.938  | 5.124  | 4.902  | 5.216  | 5.010  | 50912  | EXOSC10 | NM_016699_4_+1  |
| Mapk8   | -2.646 | 0.539  | 0.402  | -0.096 | -0.106 | -2.106 | 0.218  | 0.792  | -1.108 | -0.242 | 26419  | MAPK8   | NM_016700_14_-1 |
| Nes     | -3.668 | -4.981 | -3.831 | -4.939 | -4.546 | -4.926 | -1.666 | -4.818 | -3.109 | -4.981 | 18008  | NA      | NM_016701_3_+1  |
| Preb    | 6.577  | 6.586  | 7.802  | 7.980  | 7.413  | 7.399  | 7.180  | 7.177  | 7.605  | 7.184  | 50907  | PREB    | NM_016703_5_-1  |
| C6      | 2.956  | 0.732  | 1.955  | 0.962  | 2.933  | 1.429  | 2.686  | 2.861  | 0.718  | 0.073  | 12274  | C6      | NM_016704_15_+1 |
| Klf21a  | -4.981 | -2.274 | -4.977 | -2.998 | -3.972 | -3.120 | -4.859 | -4.914 | -4.981 | -3.895 | 16564  | KIF21A  | NM_016705_15_-1 |
| Coil    | 3.678  | 3.578  | 3.205  | 3.168  | 3.325  | 2.924  | 2.502  | 2.047  | 2.434  | 1.878  | 12812  | COIL    | NM_016706_11_+1 |
| Bcl11a  | 3.365  | 3.074  | 2.523  | 1.176  | 2.306  | 1.633  | 1.672  | 1.051  | 2.572  | 1.701  | 14025  | BCL11A  | NM_016707_11_+1 |
| Auh     | 6.289  | 6.116  | 4.835  | 4.760  | 4.552  | 4.675  | 4.593  | 4.655  | 5.275  | 5.218  | 11992  | AUH     | NM_016709_13_-1 |
| Hmgn5   | 4.827  | 4.775  | 3.305  | 3.406  | 4.053  | 4.343  | 4.527  | 3.920  | 3.070  | 3.068  | 50887  | NA      | NM_016710_X_-1  |
| Tmod2   | -2.632 | -4.981 | 1.640  | 0.713  | 4.778  | 4.542  | 2.071  | -0.006 | -3.109 | -4.981 | 50876  | TMOD2   | NM_016711_9_-1  |
| Tmod4   | -0.939 | 2.195  | -1.662 | 1.130  | -1.696 | 1.452  | -2.385 | 1.088  | -2.263 | 1.366  | 50874  | TMOD4   | NM_016712_3_+1  |
| Mink1   | 1.709  | 1.716  | 3.291  | 2.540  | 3.908  | 3.532  | 3.486  | 3.167  | 2.930  | 2.832  | 50932  | MINK1   | NM_016713_11_+1 |
| Nup50   | 5.040  | 5.155  | 5.165  | 5.297  | 5.382  | 5.070  | 5.064  | 5.058  | 4.951  | 4.638  | 18141  | NUP50   | NM_016714_15_+1 |
| Crlf2   | 4.306  | 3.693  | 4.674  | 4.109  | 4.767  | 4.424  | 5.141  | 4.408  | 5.600  | 4.637  | 57914  | CRLF2   | NM_016715_5_-1  |
| Cul3    | 6.172  | 6.212  | 6.176  | 6.108  | 6.757  | 6.662  | 6.627  | 6.399  | 7.028  | 7.242  | 26554  | CUL3    | NM_016716_1_-1  |
| Scly    | 3.633  | 3.807  | 2.922  | 3.439  | 2.830  | 3.429  | 2.744  | 2.897  | 3.127  | 3.160  | 50880  | SCLY    | NM_016717_1_+1  |
| Ninj2   | -4.981 | -4.981 | -3.711 | -4.550 | -4.898 | -4.964 | -4.760 | -2.698 | -4.981 | -4.981 | 29862  | NINJ2   | NM_016718_6_+1  |
| Grb14   | -4.981 | -4.981 | -4.981 | -4.981 | -4.778 | -2.254 | -4.954 | -4.333 | 0.938  | -0.522 | 50915  | GRB14   | NM_016719_2_-1  |
| Neu3    | 1.810  | 1.513  | 0.383  | 1.160  | 0.948  | 1.847  | 0.475  | 1.061  | 0.846  | 0.847  | 50877  | NEU3    | NM_016720_7_-1  |
| Iqgap1  | 7.303  | 7.608  | 8.394  | 8.379  | 8.666  | 8.868  | 8.676  | 8.967  | 9.699  | 9.904  | 29875  | IQGAP1  | NM_016721_7_-1  |
| Galns   | 4.083  | 4.318  | 3.317  | 3.396  | 3.043  | 3.046  | 2.750  | 3.329  | 5.945  | 5.596  | 50917  | GALNS   | NM_016722_8_-1  |
| Uchl3   | 7.354  | 7.732  | 6.160  | 6.196  | 5.834  | 5.970  | 5.292  | 5.514  | 2.999  | 3.587  | 50933  | UCHL3   | NM_016723_14_+1 |
| Nub1    | 5.804  | 5.383  | 5.767  | 5.620  | 5.908  | 5.788  | 5.635  | 4.479  | 5.235  | 4.885  | 53312  | NUB1    | NM_016736_5_+1  |
| Stip1   | 6.232  | 6.500  | 6.486  | 6.730  | 6.684  | 6.519  | 6.481  | 6.522  | 5.703  | 5.821  | 20867  | STIP1   | NM_016737_19_-1 |
| Rpl13   | 10.753 | 10.626 | 11.127 | 11.010 | 11.054 | 10.834 | 11.186 | 10.964 | 10.122 | 9.883  | 270106 | RPL13   | NM_016738_8_+1  |
| Caprin1 | 5.698  | 5.964  | 6.258  | 6.090  | 6.116  | 6.246  | 6.195  | 6.109  | 6.170  | 6.275  | 53872  | CAPRIN1 | NM_016739_2_-1  |
| S100a11 | 8.286  | 7.800  | 9.531  | 8.736  | 10.492 | 10.140 | 9.708  | 8.647  | 8.716  | 7.775  | 20195  | NA      | NM_016740_3_+1  |
| Scarb1  | 5.847  | 5.901  | 7.108  | 7.167  | 5.073  | 5.422  | 6.705  | 7.552  | 8.515  | 8.872  | 20778  | SCARB1  | NM_016741_5_-1  |
| Cdc37   | 7.021  | 6.809  | 7.160  | 6.940  | 6.947  | 6.468  | 6.965  | 6.600  | 6.688  | 5.940  | 12539  | CDC37   | NM_016742_9_-1  |
| Atp2a3  | 4.933  | 5.585  | 2.516  | 3.031  | 3.889  | 4.435  | 4.298  | 4.718  | 6.803  | 6.032  | 53313  | ATP2A3  | NM_016745_11_+1 |
| Ccnc    | 3.355  | 3.242  | 3.763  | 3.752  | 3.367  | 3.418  | 3.253  | 3.266  | 3.944  | 4.445  | 51813  | CCNC    | NM_016746_4_+1  |
| Dlg3    | -4.981 | -4.981 | -4.981 | -4.981 | -4.981 | -4.981 | -3.692 | -4.834 | -2.834 | -4.614 | 53310  | DLG3    | NM_016747_X_+1  |
| Ctps    | 3.298  | 3.419  | 3.807  | 3.893  | 3.913  | 3.959  | 3.358  | 3.356  | 2.415  | 1.994  | 51797  | CTPS1   | NM_016748_4_-1  |
| Mybph   | -4.981 | -4.981 | -4.942 | -4.942 | -4.929 | -4.032 | -4.417 | -4.690 | 0.176  | 0.312  | 53311  | MYBPH   | NM_016749_1_+1  |
| H2afz   | 9.188  | 9.366  | 10.494 | 10.510 | 10.522 | 10.377 | 10.384 | 10.213 | 9.780  | 9.950  | 51788  | H2AFZ   | NM_016750_3_+1  |
| Clec4f  | -4.981 | -4.981 | -4.967 | -4.967 | -4.963 | -4.963 | -4.981 | -4.981 | -3.738 | -4.981 | 51811  | CLEC4F  | NM_016751_6_-1  |
| Slc35b1 | 6.902  | 6.730  | 6.338  | 6.343  | 5.667  | 5.749  | 5.704  | 6.101  | 5.733  | 5.700  | 110172 | SLC35B1 | NM_016752_11_+1 |

|           |        |        |        |        |        |        |        |        |        |        |       |           |                 |
|-----------|--------|--------|--------|--------|--------|--------|--------|--------|--------|--------|-------|-----------|-----------------|
| Lxn       | 5.273  | 4.217  | 3.143  | 2.584  | 3.073  | 2.408  | 4.032  | 3.380  | 3.912  | 4.115  | 17035 | LXN       | NM_016753_3_-1  |
| Mylpf     | 1.788  | 2.134  | 2.860  | 2.421  | 1.319  | 1.646  | 1.731  | 1.198  | -0.421 | -1.090 | 17907 | MYLPF     | NM_016754_7_+1  |
| Atp5j     | 5.133  | 4.224  | 5.646  | 5.554  | 4.900  | 4.984  | 4.755  | 4.369  | 3.610  | 3.333  | 11957 | ATP5J     | NM_016755_16_-1 |
| Cdk2      | 2.506  | 2.898  | 3.773  | 3.655  | 4.449  | 4.101  | 3.926  | 3.708  | 4.360  | 4.086  | 12566 | CDK2      | NM_016756_10_-1 |
| Wbp1      | 5.724  | 5.644  | 5.464  | 5.844  | 5.307  | 5.680  | 4.684  | 4.605  | 3.711  | 3.603  | 22377 | WBP1      | NM_016757_6_-1  |
| Rgs14     | 5.554  | 5.678  | 4.852  | 4.518  | 5.260  | 5.459  | 5.100  | 5.605  | 7.231  | 6.923  | 51791 | RGS14     | NM_016758_13_+1 |
| Rundc3a   | -1.868 | -1.236 | -0.432 | 0.585  | -2.038 | -1.617 | -4.201 | -2.434 | 0.152  | -1.779 | 51799 | RUNDC3A   | NM_016759_11_+1 |
| Clta      | -1.389 | -3.800 | -3.950 | -2.470 | -2.770 | -4.200 | -2.547 | -4.393 | -4.981 | -3.002 | 12757 | CLTA      | NM_016760_4_+1  |
| Matn2     | 4.109  | 3.756  | -0.369 | 0.142  | -1.843 | -3.182 | -2.569 | 0.001  | -0.020 | -0.375 | 17181 | MATN2     | NM_016762_15_+1 |
| Hsd17b10  | 6.370  | 6.355  | 5.653  | 5.747  | 5.330  | 5.381  | 5.539  | 5.651  | 5.742  | 5.397  | 15108 | HSD17B10  | NM_016763_X_+1  |
| Prdx4     | 6.115  | 6.167  | 5.022  | 5.232  | 4.273  | 4.273  | 5.035  | 5.651  | 5.030  | 5.109  | 53381 | PRDX4     | NM_016764_X_-1  |
| Ddah2     | -4.847 | -4.789 | -4.389 | -4.946 | -4.965 | -4.663 | -3.819 | -3.407 | -4.951 | -2.504 | 51793 | DDAH2     | NM_016765_17_+1 |
| Mcrs1     | 5.593  | 5.600  | 5.750  | 5.844  | 5.896  | 5.840  | 5.643  | 5.796  | 6.066  | 5.889  | 51812 | MCRS1     | NM_016766_15_-1 |
| Batf      | 6.074  | 6.133  | 5.042  | 5.165  | 4.858  | 5.092  | 5.302  | 5.281  | 4.909  | 4.892  | 53314 | BATF      | NM_016767_12_+1 |
| Pbx3      | -4.341 | -3.502 | 2.132  | 1.768  | 1.700  | 0.311  | 1.935  | 1.748  | 2.346  | 2.748  | 18516 | PBX3      | NM_016768_2_-1  |
| Smad3     | 3.277  | 3.241  | 3.227  | 2.873  | 1.328  | 1.159  | 3.481  | 3.798  | 5.035  | 4.802  | 17127 | SMAD3     | NM_016769_9_-1  |
| Ech1      | 9.360  | 9.423  | 6.889  | 7.050  | 6.838  | 7.057  | 6.737  | 6.908  | 6.338  | 6.422  | 51798 | ECH1      | NM_016772_7_+1  |
| Atp5b     | 9.937  | 9.924  | 10.194 | 10.335 | 9.908  | 9.989  | 9.593  | 9.959  | 9.503  | 9.652  | 11947 | ATP5B     | NM_016774_10_+1 |
| Dnajc5    | 4.875  | 4.495  | 5.614  | 5.220  | 5.733  | 5.277  | 5.603  | 5.222  | 5.816  | 5.759  | 13002 | DNAJC5    | NM_016775_2_+1  |
| Mybbp1a   | 4.426  | 4.169  | 5.942  | 6.042  | 5.912  | 5.803  | 5.708  | 5.986  | 6.162  | 5.862  | 18432 | MYBBP1A   | NM_016776_11_+1 |
| Nasp      | -1.581 | -0.747 | -0.379 | -1.301 | -0.556 | -1.079 | -1.081 | 0.453  | -2.543 | -2.411 | 50927 | NASP      | NM_016777_4_-1  |
| Bok       | -1.419 | -4.981 | -3.521 | -2.920 | -3.779 | -3.897 | -2.510 | -3.576 | -4.981 | -4.316 | 51800 | BOK       | NM_016778_1_+1  |
| Itgb3     | 5.397  | 4.737  | 1.675  | 2.196  | 4.335  | 4.174  | 4.039  | 4.260  | 4.698  | 4.732  | 16416 | ITGB3     | NM_016780_11_+1 |
| Prkag1    | 5.675  | 5.709  | 5.082  | 5.288  | 5.537  | 5.451  | 5.502  | 5.472  | 5.756  | 5.514  | 19082 | PRKAG1    | NM_016781_15_-1 |
| Cntnap1   | -1.756 | -0.242 | -3.122 | -2.971 | -3.857 | -3.837 | -3.530 | -3.972 | -3.471 | -3.459 | 53321 | CNTNAP1   | NM_016782_11_+1 |
| Pgrmc1    | 6.828  | 6.910  | 5.525  | 5.579  | 5.578  | 5.904  | 5.862  | 5.958  | 5.158  | 5.664  | 53328 | PGRMC1    | NM_016783_X_+1  |
| Plrg1     | 5.967  | 5.623  | 5.195  | 5.443  | 5.407  | 5.466  | 5.288  | 5.469  | 4.965  | 5.115  | 53317 | PLRG1     | NM_016784_3_+1  |
| Tpmt      | 1.655  | 1.850  | 3.202  | 3.287  | 0.968  | 2.834  | 1.020  | 1.295  | 1.523  | 1.547  | 22017 | TPMT      | NM_016785_13_-1 |
| Ube2k     | 7.046  | 7.245  | 7.018  | 7.029  | 6.644  | 6.674  | 6.552  | 6.515  | 5.505  | 5.671  | 53323 | UBE2K     | NM_016786_5_+1  |
| Bnip2     | 6.413  | 6.663  | 7.586  | 7.374  | 7.396  | 7.367  | 7.372  | 7.076  | 7.388  | 7.114  | 12175 | BNIP2     | NM_016787_9_+1  |
| Tnk2      | 0.487  | -2.182 | -0.368 | 0.668  | 0.649  | 0.346  | -0.466 | 0.541  | -0.034 | -0.752 | 51789 | TNK2      | NM_016788_16_+1 |
| Nptx2     | -4.981 | -4.981 | -4.633 | -1.566 | -1.749 | -1.055 | -4.982 | -4.979 | -4.981 | -4.981 | 53324 | NPTX2     | NM_016789_5_+1  |
| Nfatc1    | 4.922  | 5.125  | 4.878  | 4.735  | 5.383  | 5.382  | 5.365  | 5.117  | 5.850  | 5.548  | 18018 | NFATC1    | NM_016791_18_-1 |
| Txn1l     | 6.857  | 6.903  | 6.679  | 6.870  | 6.336  | 6.471  | 6.402  | 6.607  | 5.809  | 5.950  | 53382 | TXNL1     | NM_016792_18_-1 |
| Vamp8     | 9.065  | 8.847  | 8.645  | 8.570  | 8.765  | 8.712  | 9.048  | 8.540  | 7.957  | 7.798  | 22320 | VAMP8     | NM_016794_6_-1  |
| Srpk1     | 5.352  | 5.348  | 5.283  | 5.383  | 5.498  | 5.663  | 5.056  | 5.258  | 4.429  | 4.427  | 20815 | SRPK1     | NM_016795_17_-1 |
| Vamp4     | 4.365  | 4.293  | 4.455  | 4.314  | 4.844  | 4.714  | 4.739  | 4.536  | 4.610  | 4.744  | 53330 | VAMP4     | NM_016796_1_+1  |
| Stx7      | 9.376  | 9.710  | 8.478  | 8.388  | 8.408  | 8.471  | 8.253  | 8.157  | 8.195  | 8.424  | 53331 | STX7      | NM_016797_10_+1 |
| Srrm1     | 6.376  | 6.472  | 6.840  | 6.810  | 7.393  | 7.220  | 7.003  | 6.683  | 6.305  | 5.974  | 51796 | NA        | NM_016799_4_-1  |
| Vti1b     | 7.242  | 7.300  | 7.076  | 7.080  | 6.799  | 6.906  | 6.515  | 6.456  | 5.911  | 5.688  | 53612 | VTI1B     | NM_016800_12_-1 |
| Stx1a     | -0.278 | 0.743  | -3.825 | -2.134 | -2.406 | -1.792 | -4.013 | -2.785 | -3.491 | -2.910 | 20907 | STX1A     | NM_016801_5_+1  |
| Rhoa      | 9.132  | 9.245  | 9.018  | 9.084  | 9.205  | 9.162  | 9.090  | 9.199  | 9.678  | 9.677  | 11848 | RHOA      | NM_016802_9_+1  |
| Chst3     | 3.176  | 3.613  | 0.214  | 0.016  | 1.574  | 1.945  | 0.792  | 2.734  | -4.190 | -0.734 | 53374 | CHST3     | NM_016803_10_-1 |
| Mtx2      | 6.023  | 6.135  | 5.590  | 5.672  | 5.513  | 5.495  | 5.332  | 5.397  | 4.727  | 4.919  | 53375 | MTX2      | NM_016804_2_+1  |
| Hnrnpu    | 8.408  | 8.603  | 8.772  | 8.959  | 8.981  | 9.006  | 8.660  | 8.801  | 8.810  | 9.019  | 51810 | HNRNPU    | NM_016805_1_-1  |
| Hnrnpa2b1 | 8.943  | 8.846  | 8.873  | 8.932  | 8.919  | 8.965  | 8.278  | 8.571  | 8.000  | 8.102  | 53379 | HNRNPA2B1 | NM_016806_6_-1  |
| Sdcbp     | 6.819  | 6.603  | 6.719  | 6.696  | 6.363  | 6.066  | 7.039  | 7.274  | 7.554  | 7.679  | 53378 | SDCBP     | NM_016807_4_+1  |
| Usp2      | -1.898 | -3.256 | -3.719 | -4.065 | -2.517 | -4.040 | -3.236 | -2.529 | -1.668 | -4.977 | 53376 | USP2      | NM_016808_9_+1  |
| Rbm3      | -1.531 | 0.307  | 1.694  | 0.883  | 1.186  | 1.075  | 1.316  | 1.691  | 1.394  | 2.354  | 19652 | RBM3      | NM_016809_X_-1  |
| Gosr1     | 4.970  | 5.360  | 5.467  | 5.646  | 5.224  | 5.294  | 4.990  | 5.174  | 5.444  | 5.808  | 53334 | GOSR1     | NM_016810_11_-1 |
| Dgka      | 2.895  | 3.449  | 4.247  | 4.560  | 4.369  | 4.650  | 4.793  | 5.691  | 5.860  | 5.779  | 13139 | DGKA      | NM_016811_10_-1 |
| Banp      | 1.314  | 2.974  | 2.460  | 2.119  | 3.405  | 3.253  | 2.343  | 1.974  | 1.996  | 2.001  | 53325 | BANP      | NM_016812_8_+1  |
| Nxf1      | 7.383  | 7.624  | 6.626  | 6.864  | 6.895  | 7.212  | 6.529  | 6.644  | 5.932  | 6.239  | 53319 | NXF1      | NM_016813_19_+1 |
| Atxn10    | 6.614  | 6.674  | 7.400  | 7.509  | 7.485  | 7.947  | 6.963  | 6.879  | 6.544  | 6.301  | 54138 | ATXN10    | NM_016843_15_+1 |
| Rps28     | 8.005  | 7.564  | 8.548  | 8.185  | 8.075  | 7.680  | 8.449  | 8.032  | 7.469  | 6.908  | 54127 | RPS28     | NM_016844_17_-1 |
| Acrbp     | 0.203  | -0.851 | 0.485  | -0.727 | 0.758  | -0.781 | -0.117 | -1.073 | 0.656  | 0.222  | 54137 | ACRBP     | NM_016845_6_+1  |
| Rgl1      | 5.587  | 5.577  | 4.715  | 4.338  | 6.924  | 7.045  | 7.090  | 6.947  | 3.062  | 3.928  | 19731 | RGL1      | NM_016846_1_-1  |
| Irf3      | 6.145  | 6.298  | 5.486  | 5.748  | 5.961  | 6.047  | 5.616  | 5.676  | 5.227  | 5.274  | 54131 | IRF3      | NM_016849_7_+1  |
| Irf7      | 8.310  | 7.982  | 6.685  | 5.994  | 6.547  | 5.183  | 6.720  | 6.333  | 8.040  | 7.054  | 54123 | IRF7      | NM_016850_7_-1  |
| Irf6      | -2.727 | -1.115 | 1.502  | 1.434  | 0.049  | 1.393  | -2.311 | 0.098  | -4.394 | -1.306 | 54139 | IRF6      | NM_016851_1_+1  |
| Wbp2      | 7.618  | 7.726  | 6.805  | 6.770  | 7.344  | 7.156  | 7.030  | 6.844  | 7.042  | 6.753  | 22378 | WBP2      | NM_016852_11_-1 |
| Stac      | -4.981 | -4.981 | -1.755 | -2.388 | -1.430 | -1.203 | -1.972 | -1.850 | -0.045 | 0.300  | 20840 | STAC      | NM_016853_9_-1  |
| Cpsf2     | 5.362  | 5.157  | 5.910  | 5.837  | 6.211  | 6.113  | 6.027  | 5.875  | 6.184  | 5.934  | 51786 | CPSF2     | NM_016856_12_+1 |
| Exoc7     | 1.575  | 1.784  | 0.800  | 1.341  | 0.628  | 0.748  | 0.014  | -0.265 | 0.731  | 0.169  | 53413 | EXOC7     | NM_016857_11_-1 |
| Rab33b    | 8.000  | 8.725  | 5.848  | 5.659  | 4.434  | 4.794  | 4.361  | 4.879  | 4.640  | 4.984  | 19338 | RAB33B    | NM_016858_3_+1  |
| Bysl      | 4.023  | 3.719  | 3.894  | 4.337  | 4.074  | 4.347  | 3.985  | 4.340  | 4.555  | 4.411  | 53414 | BYSL      | NM_016859_17_-1 |
| Actr1a    | 5.226  | 5.278  | 5.967  | 5.886  | 6.157  | 6.176  | 6.340  | 6.376  | 7.319  | 7.376  | 54130 | ACTR1A    | NM_016860_19_-1 |
| Pdlim1    | 6.872  | 6.214  | 2.348  | 2.332  | 0.946  | 2.626  | 4.255  | 5.211  | 7.246  | 7.158  | 54132 | PDLM1     | NM_016861_19_-1 |
| Vti1a     | 4.411  | 4.712  | 4.441  | 4.622  | 5.144  | 5.063  | 4.706  | 5.158  | 5.135  | 5.016  | 53611 | VTI1A     | NM_016862_19_+1 |
| Fkbp1b    | 0.211  | -1.521 | 3.462  | 3.299  | 0.865  | 0.456  | 3.326  | 3.565  | 4.363  | 4.382  | 14226 | FKBP1B    | NM_016863_12_-1 |
| Htatip2   | 5.054  | 4.836  | 4.114  | 4.189  | 3.641  | 3.612  | 3.943  | 4.218  | 4.591  | 3.782  | 53415 | HTATIP2   | NM_016865_7_+1  |
| Stk39     | -0.009 | -1.729 | 3.696  | 4.322  | 1.708  | 2.115  | 1.939  | 1.955  | 0.312  | -0.775 | 53416 | STK39     | NM_016866_2_-1  |
| Hif3a     | -4.981 | -4.981 | -4.869 | -4.489 | -4.980 | -4.978 | -4.922 | -4.742 | -4.981 | -4.486 | 53417 | HIF3A     | NM_016868_7_-1  |
| Corin     | -4.981 | -4.284 | -4.667 | -4.896 | -4.967 | -4.943 | -4.706 | -4.831 | -4.139 | -4.447 | 53419 | CORIN     | NM_016869_5_-1  |

|            |        |        |        |        |        |        |        |        |        |        |           |            |                 |
|------------|--------|--------|--------|--------|--------|--------|--------|--------|--------|--------|-----------|------------|-----------------|
| Tomm40     | 5.152  | 4.778  | 4.896  | 5.095  | 4.914  | 4.863  | 4.899  | 4.877  | 4.803  | 4.362  | 53333     | TOMM40     | NM_016871_7_-1  |
| Vamp5      | 3.273  | 0.352  | 4.228  | 4.203  | 5.021  | 4.903  | 4.748  | 4.341  | 2.901  | 2.836  | 53620     | VAMP5      | NM_016872_6_-1  |
| Wisp2      | -4.981 | -3.315 | -4.056 | -4.979 | -4.424 | -2.912 | -4.395 | -2.897 | -4.981 | -4.981 | 22403     | WISP2      | NM_016873_2_+1  |
| Deaf1      | 2.709  | 2.925  | 3.788  | 3.844  | 3.559  | 3.348  | 3.737  | 3.581  | 4.649  | 4.259  | 54006     | DEAF1      | NM_016874_7_-1  |
| Ybx2       | -1.436 | -1.296 | -4.981 | -4.981 | -4.980 | -4.980 | -4.981 | -4.981 | -4.981 | -4.981 | 53422     | YBX2       | NM_016875_11_+1 |
| Eif3g      | 7.808  | 7.735  | 7.900  | 7.568  | 7.231  | 7.271  | 7.179  | 7.246  | 6.596  | 6.269  | 53356     | EIF3G      | NM_016876_9_-1  |
| Cnot4      | 2.507  | 2.931  | 2.237  | 2.621  | 2.675  | 2.429  | 2.434  | 2.613  | 2.124  | 2.069  | 53621     | CNOT4      | NM_016877_6_-1  |
| Dnpep      | 6.169  | 6.030  | 4.866  | 5.004  | 4.549  | 4.633  | 4.779  | 4.901  | 5.004  | 5.013  | 13437     | DNPEP      | NM_016878_1_-1  |
| Pmm2       | 5.856  | 5.741  | 5.709  | 5.767  | 5.413  | 5.425  | 5.402  | 5.505  | 5.553  | 5.467  | 54128     | PMM2       | NM_016881_16_+1 |
| Sart1      | 5.892  | 5.582  | 5.929  | 5.830  | 6.094  | 6.112  | 6.040  | 5.921  | 6.182  | 5.931  | 20227     | SART1      | NM_016882_19_-1 |
| Psmd10     | 6.230  | 6.166  | 5.722  | 5.932  | 5.624  | 5.699  | 5.565  | 5.367  | 4.710  | 4.747  | 53380     | PSMD10     | NM_016883_X_-1  |
| Hnrnpc     | 6.712  | 6.857  | 6.436  | 6.528  | 6.467  | 6.423  | 6.248  | 6.460  | 5.866  | 5.826  | 15381     | HNRNPC     | NM_016884_14_-1 |
| Gria3      | 5.508  | 6.567  | 0.532  | -2.241 | 1.361  | 0.686  | 1.584  | 0.956  | 0.462  | 1.514  | 53623     | GRIA3      | NM_016886_X_+1  |
| Cldn7      | -4.981 | -2.600 | -2.983 | -4.394 | -1.718 | 1.822  | -4.111 | -1.569 | -4.981 | -4.342 | 53624     | CLDN7      | NM_016887_11_+1 |
| B3gnt2     | 6.573  | 7.088  | 4.591  | 4.705  | 4.768  | 4.633  | 4.861  | 5.554  | 6.062  | 5.718  | 53625     | B3GNT2     | NM_016888_11_-1 |
| Insm1      | -2.439 | -4.981 | 0.995  | 0.238  | 1.983  | 1.314  | 0.938  | -2.469 | -4.981 | -4.981 | 53626     | INSM1      | NM_016889_2_+1  |
| Dctn3      | 7.699  | 7.702  | 7.005  | 6.992  | 6.788  | 6.823  | 6.921  | 6.853  | 6.377  | 6.282  | 53598     | DCTN3      | NM_016890_4_-1  |
| Ppp2r1a    | 6.852  | 6.994  | 7.344  | 7.442  | 7.095  | 6.990  | 7.028  | 7.278  | 7.530  | 7.500  | 51792     | PPP2R1A    | NM_016891_17_+1 |
| Ccs        | 6.794  | 6.752  | 4.975  | 5.047  | 4.801  | 5.032  | 4.954  | 5.069  | 4.721  | 4.724  | 12460     | CCS        | NM_016892_19_-1 |
| Fut8       | 3.898  | 3.407  | 3.768  | 3.727  | 2.563  | 2.902  | 2.642  | 3.932  | 3.885  | 4.533  | 53618     | FUT8       | NM_016893_12_+1 |
| Ramp1      | 9.568  | 10.018 | 7.684  | 7.301  | 7.051  | 7.119  | 7.956  | 7.457  | 7.253  | 5.259  | 51801     | RAMP1      | NM_016894_1_+1  |
| Ak2        | 6.683  | 6.384  | 6.600  | 6.614  | 7.179  | 7.043  | 7.220  | 7.130  | 6.923  | 6.625  | 11637     | AK2        | NM_016895_4_+1  |
| Map3k14    | 3.061  | 2.905  | 5.419  | 5.121  | 6.143  | 5.925  | 6.226  | 5.591  | 6.562  | 6.278  | 53859     | MAP3K14    | NM_016896_11_-1 |
| Timm23     | 7.778  | 7.593  | 7.717  | 7.813  | 7.287  | 7.283  | 7.185  | 7.327  | 6.768  | 6.599  | 53600     | TIMM23     | NM_016897_14_-1 |
| Cd164      | 9.421  | 9.690  | 6.268  | 6.441  | 7.106  | 7.548  | 6.627  | 6.893  | 6.089  | 6.308  | 53599     | CD164      | NM_016898_10_+1 |
| Rab25      | -0.461 | -0.402 | -3.666 | -2.717 | -3.595 | -4.505 | -2.660 | -3.953 | -4.394 | -4.342 | 53868     | RAB25      | NM_016899_3_-1  |
| Capv2      | 3.440  | 3.543  | 0.041  | -0.263 | -0.336 | 0.564  | 2.276  | 2.869  | 3.678  | 4.756  | 12390     | CAV2       | NM_016900_6_+1  |
| Nphp1      | 2.428  | 1.607  | 1.286  | 0.409  | -2.394 | -0.879 | -2.165 | -0.124 | -3.166 | -3.875 | 53885     | NPHP1      | NM_016902_2_-1  |
| Esd        | 7.842  | 7.739  | 7.329  | 7.444  | 7.070  | 7.058  | 7.181  | 7.122  | 7.342  | 7.033  | 13885     | ESD        | NM_016903_14_+1 |
| Cks1b      | 5.540  | 5.055  | 6.888  | 6.817  | 6.465  | 6.075  | 6.037  | 5.586  | 3.347  | 3.190  | 54124     | CKS1B      | NM_016904_3_-1  |
| Galk1      | 7.512  | 7.357  | 3.800  | 3.997  | 3.533  | 3.414  | 3.781  | 4.276  | 4.217  | 3.508  | 14635     | GALK1      | NM_016905_11_-1 |
| Sec61a1    | 7.551  | 7.562  | 7.397  | 7.501  | 6.573  | 6.546  | 6.745  | 7.277  | 7.834  | 7.872  | 53421     | SEC61A1    | NM_016906_6_-1  |
| Spint1     | 0.818  | 2.757  | 6.580  | -2.561 | 7.105  | 1.486  | 6.760  | -0.645 | -0.587 | -4.981 | 20732     | SPINT1     | NM_016907_2_+1  |
| Tsnax      | 6.278  | 6.276  | 6.495  | 6.488  | 6.353  | 6.477  | 6.114  | 6.334  | 6.327  | 6.263  | 53424     | TSNAX      | NM_016909_8_+1  |
| Ppm1d      | 4.392  | 4.366  | 4.312  | 4.121  | 4.243  | 4.307  | 4.239  | 4.283  | 4.756  | 4.508  | 53892     | PPM1D      | NM_016910_11_+1 |
| Cdkl2      | -4.981 | -3.072 | -2.566 | -2.020 | -3.178 | -2.542 | -3.011 | -1.858 | -0.627 | -1.363 | 53886     | CDKL2      | NM_016912_5_-1  |
| Porcn      | -3.203 | -3.482 | 0.094  | 1.377  | -1.253 | -0.145 | -0.749 | 1.046  | -0.129 | 1.339  | 53627     | PORCN      | NM_016913_X_-1  |
| Prg3       | 1.206  | -1.005 | -2.643 | -2.682 | 0.385  | 0.204  | -0.898 | -0.107 | -3.531 | -3.498 | 53856     | PRG3       | NM_016914_2_+1  |
| Pla2g6     | -2.128 | 0.710  | -1.765 | -3.188 | -4.911 | -4.916 | -4.150 | -4.836 | -1.609 | -4.732 | 53357     | PLA2G6     | NM_016915_15_-1 |
| Bicap      | 5.944  | 6.171  | 4.281  | 4.490  | 4.276  | 4.474  | 3.937  | 4.386  | 3.824  | 4.296  | 53619     | BLCAP      | NM_016916_2_-1  |
| Slc40a1    | 5.517  | 2.937  | 5.354  | 5.339  | 6.294  | 5.393  | 5.975  | 6.831  | 4.375  | 4.147  | 53945     | SLC40A1    | NM_016917_1_-1  |
| Nudt5      | 4.711  | 4.730  | 4.710  | 5.167  | 4.664  | 4.880  | 4.418  | 4.606  | 3.051  | 3.410  | 53893     | NUDT5      | NM_016918_2_+1  |
| Col5a3     | -4.981 | -4.981 | -4.892 | -4.892 | -4.979 | -4.979 | -4.887 | -4.350 | -4.981 | -4.981 | 53867     | COL5A3     | NM_016919_9_-1  |
| Atp6v0a1   | 1.312  | 0.935  | -2.875 | -3.967 | -3.137 | -1.707 | -3.084 | -3.701 | -3.335 | -4.210 | 11975     | ATP6VOA1   | NM_016920_11_+1 |
| Tcirg1     | 0.758  | 1.987  | -0.752 | 1.059  | 0.154  | 0.548  | 2.582  | 2.027  | 2.868  | 2.787  | 27060     | TCIRG1     | NM_016921_19_-1 |
| Gal3st1    | -4.981 | -4.981 | -4.904 | -4.974 | -4.969 | -4.978 | -4.980 | -4.979 | -4.981 | -4.976 | 53897     | GAL3ST1    | NM_016922_11_+1 |
| Ly96       | 4.921  | 4.678  | 4.419  | 4.694  | 3.768  | 4.083  | 4.535  | 4.803  | 4.402  | 4.823  | 17087     | LY96       | NM_016923_1_+1  |
| Rwdd2b     | 3.570  | 3.071  | 3.052  | 3.281  | 2.905  | 2.728  | 2.529  | 2.624  | 3.119  | 3.009  | 53858     | RWDD2B     | NM_016924_16_-1 |
| Fanca      | -0.820 | -0.615 | 5.060  | 4.682  | 2.832  | 2.101  | 2.858  | 3.416  | 4.327  | 3.955  | 14087     | FANCA      | NM_016925_8_-1  |
| Sart3      | 4.509  | 4.516  | 4.808  | 4.921  | 5.156  | 5.013  | 5.085  | 4.811  | 5.524  | 5.377  | 53890     | SART3      | NM_016926_5_-1  |
| Pkd2l2     | 1.032  | 1.553  | -1.032 | -0.842 | -0.751 | -0.170 | -1.138 | 0.744  | -0.074 | 0.423  | 53871     | PKD2L2     | NM_016927_18_+1 |
| Tlr5       | 0.741  | 1.011  | 0.666  | 0.502  | 3.537  | 3.630  | 2.551  | 1.923  | 2.541  | 2.902  | 53791     | TLR5       | NM_016928_1_+1  |
| Ptprcap    | 9.178  | 9.173  | 3.867  | 4.451  | 5.182  | 5.780  | 4.369  | 6.385  | 1.754  | 1.761  | 19265     | PTPRCAP    | NM_016933_19_+1 |
| Hbb-b2     | 4.667  | 7.954  | 5.751  | 8.840  | 5.787  | 9.782  | 6.006  | 9.341  | 4.412  | 7.437  | 15130     | NA         | NM_016956_7_-1  |
| Hmgn2      | 9.554  | 9.313  | 8.540  | 8.730  | 9.307  | 8.154  | 8.709  | 7.914  | 8.050  | 6.558  | 15331     | NA         | NM_016957_4_-1  |
| Rps3a1     | 10.268 | 10.251 | 10.591 | 10.533 | 10.242 | 10.205 | 10.153 | 10.249 | 9.234  | 9.296  | 20091     | NA         | NM_016959_3_-1  |
| Mapk9      | -0.116 | 0.964  | 0.662  | 0.091  | 0.066  | -1.563 | 0.758  | -1.317 | 0.410  | 0.187  | 26420     | MAPK9      | NM_016961_11_+1 |
| Spast      | 3.599  | 3.508  | 4.144  | 3.315  | 3.834  | 3.781  | 3.925  | 3.839  | 3.400  | 3.894  | 50850     | SPAST      | NM_016962_17_+1 |
| Tmod3      | 6.649  | 6.677  | 6.705  | 6.507  | 7.175  | 6.956  | 7.185  | 6.898  | 7.266  | 7.376  | 50875     | TMOD3      | NM_016963_9_-1  |
| Stag3      | 0.696  | 1.891  | -0.102 | 0.107  | 1.805  | 1.926  | 1.766  | 1.553  | 0.750  | 1.104  | 50878     | STAG3      | NM_016964_5_+1  |
| Nckap1     | 1.078  | 0.956  | -1.327 | -0.177 | -1.929 | 0.459  | -1.136 | -0.047 | -1.247 | -0.072 | 50884     | NCKAP1     | NM_016965_2_-1  |
| Phgdh      | 7.257  | 6.349  | 3.058  | 3.066  | 4.342  | 3.979  | 2.768  | 3.990  | 1.906  | 1.821  | 236539    | PHGDH      | NM_016966_3_-1  |
| Olig2      | -4.981 | -4.981 | -4.867 | -3.138 | -4.971 | -4.788 | -4.889 | -4.200 | -4.981 | -4.981 | 50913     | OLIG2      | NM_016967_16_+1 |
| Olig1      | -4.981 | -4.981 | -3.818 | -2.436 | -4.870 | -3.274 | -2.912 | -3.585 | -4.981 | -4.981 | 50914     | OLIG1      | NM_016968_16_+1 |
| Myadm      | 4.030  | 4.958  | 5.967  | 5.547  | 6.872  | 7.102  | 6.147  | 6.647  | 8.137  | 8.186  | 50918     | MYADM      | NM_016969_7_+1  |
| Klrg1      | -2.178 | -4.981 | -4.323 | -3.887 | 0.245  | 3.060  | -1.445 | 0.294  | -2.025 | -4.981 | 50928     | KLRG1      | NM_016970_6_-1  |
| Slc7a8     | -0.406 | -1.786 | 3.711  | 4.402  | 0.459  | 1.305  | 2.566  | 4.154  | 4.217  | 5.756  | 50934     | SLC7A8     | NM_016972_14_-1 |
| St6galnac6 | -3.978 | -3.517 | -3.364 | -1.541 | -2.855 | -2.606 | -2.006 | -0.412 | -0.531 | -0.457 | 50935     | ST6GALNAC6 | NM_016973_2_+1  |
| Dbp        | 3.139  | 2.912  | 0.682  | 0.634  | 3.321  | 3.310  | 1.577  | 1.285  | 0.114  | -0.780 | 13170     | DBP        | NM_016974_7_+1  |
| Grm1       | -4.981 | -4.981 | -2.625 | -3.671 | -2.879 | -3.855 | -4.951 | -4.622 | -4.981 | -4.981 | 14816     | GRM1       | NM_016976_10_-1 |
| Oat        | 6.207  | 6.213  | 7.369  | 7.523  | 7.548  | 7.364  | 7.130  | 6.897  | 6.020  | 6.161  | 18242     | OAT        | NM_016978_7_-1  |
| Prkx       | 4.439  | 4.425  | 6.069  | 5.781  | 4.494  | 4.806  | 5.305  | 5.841  | 7.422  | 7.490  | 19108     | PRKX       | NM_016979_X_-1  |
| Rpl5       | 9.097  | 8.890  | 9.316  | 9.200  | 9.121  | 8.995  | 9.199  | 8.839  | 7.790  | 7.546  | 100503670 | RPL5       | NM_016980_5_+1  |
| Slc9a1     | 5.070  | 4.881  | 3.484  | 3.392  | 3.558  | 3.417  | 3.556  | 3.519  | 4.842  | 4.782  | 20544     | SLC9A1     | NM_016981_4_+1  |

|         |        |        |        |        |        |        |        |        |        |        |        |         |                 |
|---------|--------|--------|--------|--------|--------|--------|--------|--------|--------|--------|--------|---------|-----------------|
| Vpreb1  | 0.705  | 0.871  | -2.712 | -2.386 | -2.261 | -2.445 | -1.913 | -2.077 | -3.204 | -0.731 | 22362  | VPREB1  | NM_016982_16_-1 |
| Mtmr1   | 5.432  | 5.405  | 6.485  | 6.330  | 5.681  | 5.634  | 5.243  | 5.269  | 5.031  | 5.330  | 53332  | MTMR1   | NM_016985_X_+1  |
| Acadvl  | 6.056  | 5.955  | 5.663  | 6.156  | 6.274  | 6.389  | 5.701  | 6.034  | 6.205  | 6.245  | 11370  | ACADVL  | NM_017366_11_-1 |
| Ccni    | 6.999  | 7.231  | 6.854  | 7.170  | 6.502  | 6.956  | 6.682  | 6.911  | 7.091  | 7.512  | 12453  | CCNI    | NM_017367_5_-1  |
| Celf1   | 0.721  | 1.290  | 0.873  | 1.649  | 1.515  | 1.359  | 1.300  | 1.810  | 2.042  | 2.326  | 13046  | NA      | NM_017368_2_+1  |
| Gabre   | -4.981 | -3.267 | -4.584 | -4.808 | -4.204 | -4.164 | -4.564 | -4.102 | -3.738 | -4.981 | 14404  | NA      | NM_017369_X_-1  |
| Hp      | -4.981 | -4.981 | -0.366 | 2.330  | -1.038 | 3.820  | 5.307  | 6.269  | 10.504 | 10.413 | 15439  | HP      | NM_017370_8_-1  |
| Hpx     | -0.418 | -0.639 | -1.310 | -3.385 | -3.005 | -4.072 | -3.026 | -3.968 | -2.286 | -2.753 | 15458  | HPX     | NM_017371_7_-1  |
| Lyz2    | 6.834  | 3.099  | 9.266  | 8.931  | 7.606  | 8.527  | 12.833 | 13.495 | 14.976 | 14.976 | 17105  | LYZ     | NM_017372_10_-1 |
| Nfil3   | 3.850  | 4.871  | 5.255  | 5.112  | 4.803  | 4.736  | 5.585  | 5.886  | 7.942  | 7.500  | 18030  | NFIL3   | NM_017373_13_-1 |
| Ppp2cb  | 5.194  | 4.628  | 5.443  | 4.971  | 5.273  | 4.747  | 5.438  | 4.713  | 6.686  | 5.077  | 19053  | PPP2CB  | NM_017374_8_+1  |
| Ostf1   | 8.309  | 8.321  | 8.682  | 8.548  | 9.065  | 8.920  | 8.751  | 8.533  | 8.635  | 8.415  | 20409  | OSTF1   | NM_017375_19_-1 |
| Tef     | 2.492  | 2.389  | 0.502  | 0.622  | 3.080  | 1.961  | 2.429  | 2.462  | 2.936  | 2.891  | 21685  | TEF     | NM_017376_15_+1 |
| B4galt2 | -1.368 | -4.981 | -3.499 | -3.758 | -3.726 | -3.596 | -4.793 | -4.271 | -4.054 | -4.981 | 53418  | B4GALT2 | NM_017377_4_-1  |
| Tuba8   | 0.614  | -1.641 | -4.571 | -1.135 | -1.872 | -1.982 | -0.551 | -2.205 | 1.089  | -2.496 | 53857  | TUBA8   | NM_017379_6_+1  |
| Sept9   | 4.749  | 4.708  | 6.691  | 6.670  | 1.966  | 2.405  | 4.243  | 4.563  | 7.155  | 7.002  | 53860  | SEPT9   | NM_017380_11_+1 |
| Zranb2  | 5.862  | 6.087  | 5.686  | 5.801  | 5.837  | 6.034  | 6.017  | 5.916  | 4.905  | 5.794  | 53861  | NA      | NM_017381_3_+1  |
| Rab11a  | 7.848  | 7.866  | 8.579  | 8.156  | 7.224  | 7.069  | 7.441  | 7.326  | 7.150  | 7.173  | 53869  | RAB11A  | NM_017382_9_-1  |
| Ear3    | -4.921 | -4.981 | -4.970 | -4.658 | -4.957 | -1.658 | -4.949 | -4.634 | -4.977 | -4.888 | 53876  | NA      | NM_017388_14_+1 |
| Ear14   | -4.981 | -2.801 | -4.974 | -4.974 | -4.981 | -4.981 | -4.981 | -4.981 | -4.981 | -4.981 | 503847 | NA      | NM_017389_14_+1 |
| Svs2    | -4.981 | -4.981 | -4.294 | -1.381 | -4.981 | -4.981 | -4.952 | -3.720 | -4.981 | -3.233 | 53878  | NA      | NM_017390_2_-1  |
| Slc5a3  | 2.517  | 2.661  | 2.332  | 1.457  | 2.235  | 1.767  | 2.238  | 1.271  | -0.196 | 1.445  | 53881  | SLC5A3  | NM_017391_16_+1 |
| Celsr2  | -4.425 | -3.630 | -3.972 | -4.963 | -3.622 | -3.873 | -4.073 | -3.418 | -4.079 | -4.450 | 53883  | CELSR2  | NM_017392_3_-1  |
| Clpp    | 6.319  | 6.245  | 5.394  | 5.488  | 5.302  | 5.572  | 5.255  | 5.411  | 4.194  | 3.789  | 53895  | CLPP    | NM_017393_17_+1 |
| Slc7a10 | -4.981 | -0.426 | -4.952 | -0.719 | -0.916 | 0.129  | -4.965 | -3.029 | -4.394 | -4.981 | 53896  | SLC7A10 | NM_017394_7_+1  |
| Rfx5    | 4.088  | 3.857  | 4.912  | 4.922  | 5.842  | 5.928  | 5.173  | 4.939  | 3.831  | 3.732  | 53970  | NA      | NM_017395_3_+1  |
| Ddx20   | 4.040  | 4.111  | 3.529  | 3.582  | 4.025  | 3.889  | 3.841  | 3.482  | 4.142  | 3.911  | 53975  | DDX20   | NM_017397_3_-1  |
| Fabp1   | -2.273 | -4.981 | -3.002 | -2.564 | -0.516 | 1.147  | -1.632 | -0.019 | -4.981 | -2.867 | 14080  | FABP1   | NM_017399_6_+1  |
| Sh3gl3  | -2.948 | -4.981 | 0.036  | 0.732  | -4.902 | -4.300 | -4.943 | -3.992 | -4.981 | -4.981 | 20408  | SH3GL3  | NM_017400_7_+1  |
| Polm    | 3.347  | 2.711  | 2.832  | 2.833  | 2.003  | 2.305  | 3.055  | 3.240  | 4.291  | 4.001  | 54125  | POLM    | NM_017401_11_-1 |
| Arhgef7 | 3.099  | 3.143  | 3.739  | 3.715  | 3.400  | 3.777  | 3.247  | 2.891  | 3.047  | 2.979  | 54126  | ARHGEF7 | NM_017402_8_+1  |
| Mrp139  | 6.290  | 6.258  | 5.299  | 5.505  | 5.097  | 5.129  | 5.009  | 5.167  | 4.524  | 4.569  | 27393  | MRPL39  | NM_017404_16_-1 |
| Lsr     | -4.901 | -4.348 | 3.547  | 3.602  | 0.198  | -0.488 | 1.566  | 0.840  | 2.813  | 1.396  | 54135  | LSR     | NM_017405_7_-1  |
| Atf6b   | 6.209  | 5.993  | 6.450  | 6.460  | 6.354  | 6.179  | 6.252  | 6.264  | 6.953  | 6.832  | 12915  | ATF6B   | NM_017406_17_+1 |
| Spag5   | 1.144  | 1.693  | 2.187  | 2.200  | 3.065  | 2.113  | 2.399  | 1.310  | 1.099  | -0.041 | 54141  | SPAG5   | NM_017407_11_+1 |
| Sept1   | 6.805  | 6.782  | 4.401  | 4.583  | 5.478  | 5.683  | 3.787  | 4.268  | 1.056  | -0.246 | 54204  | SEPT1   | NM_017461_7_-1  |
| Polg    | 2.385  | 2.840  | 3.560  | 3.827  | 3.511  | 3.902  | 4.260  | 4.739  | 5.371  | 5.629  | 18975  | POLG    | NM_017462_7_-1  |
| Pbx2    | 1.784  | 2.398  | 1.932  | 1.687  | 2.571  | 2.321  | 2.849  | 2.198  | 2.665  | 2.505  | 18515  | PBX2    | NM_017463_17_+1 |
| Nedd9   | 4.632  | 4.666  | 2.826  | 2.535  | 4.867  | 5.512  | 3.712  | 3.242  | 3.216  | 2.772  | 18003  | NEDD9   | NM_017464_13_-1 |
| Sult2b1 | 0.362  | 1.588  | -1.000 | -1.204 | -0.827 | -0.205 | -1.458 | -1.527 | -2.953 | -3.882 | 54200  | SULT2B1 | NM_017465_7_-1  |
| Ccrl2   | 0.893  | 0.126  | 4.099  | 4.140  | 7.250  | 8.353  | 6.343  | 7.038  | 4.936  | 6.603  | 54199  | CCRL2   | NM_017466_9_-1  |
| Zfp316  | 0.725  | 0.474  | 1.186  | 1.350  | 1.477  | 1.480  | 1.012  | 0.241  | 1.845  | 1.578  | 54201  | ZNF316  | NM_017467_5_-1  |
| Gucy1b3 | -4.981 | -4.981 | -4.978 | -4.638 | -4.685 | -4.917 | -4.082 | -4.887 | -3.316 | -3.086 | 54195  | GUCY1B3 | NM_017469_3_-1  |
| Dnal4   | 4.991  | 5.149  | 3.933  | 3.728  | 4.102  | 4.003  | 3.907  | 3.968  | 4.727  | 4.329  | 54152  | DNAL4   | NM_017470_15_-1 |
| Snx3    | 7.981  | 8.207  | 8.634  | 8.795  | 8.210  | 8.289  | 7.972  | 8.163  | 7.407  | 7.441  | 54198  | SNX3    | NM_017472_10_+1 |
| Rragc   | 6.808  | 6.852  | 7.091  | 7.100  | 6.826  | 6.997  | 6.808  | 6.800  | 6.905  | 6.938  | 54170  | RRAGC   | NM_017475_4_+1  |
| Akap8l  | 6.077  | 6.161  | 5.427  | 5.490  | 6.367  | 6.483  | 5.903  | 5.908  | 5.406  | 5.329  | 54194  | AKAP8L  | NM_017476_17_-1 |
| Copg1   | 6.305  | 6.328  | 6.500  | 6.549  | 6.367  | 6.474  | 6.420  | 6.587  | 6.730  | 6.863  | 54161  | COPG1   | NM_017477_6_+1  |
| Copg2   | 4.578  | 4.688  | 6.781  | 6.387  | 5.112  | 4.942  | 5.025  | 5.380  | 5.230  | 5.663  | 54160  | COPG2   | NM_017478_6_-1  |
| Kat6b   | 3.294  | 3.285  | 2.171  | 2.929  | 2.408  | 1.578  | 1.612  | -0.384 | 1.609  | 0.425  | 54169  | NA      | NM_017479_14_+1 |
| Icos    | 1.176  | -1.814 | 4.749  | 2.744  | 5.568  | 5.442  | 3.785  | 2.782  | -0.150 | -0.391 | 54167  | ICOS    | NM_017480_1_+1  |
| Cd244   | 6.178  | 6.847  | 7.059  | 5.808  | 7.985  | 7.182  | 7.504  | 6.804  | 7.473  | 6.795  | 18106  | CD244   | NM_018729_1_+1  |
| Rpl36   | 8.726  | 8.677  | 8.947  | 8.862  | 8.911  | 8.863  | 9.266  | 9.171  | 8.223  | 7.888  | 54217  | NA      | NM_018730_17_+1 |
| Atp4a   | -4.264 | -2.283 | -2.382 | -4.592 | -2.511 | -4.848 | -3.696 | -4.434 | -2.949 | -3.904 | 11944  | ATP4A   | NM_018731_7_+1  |
| Scn3a   | 3.830  | 3.582  | -0.844 | -2.694 | 5.861  | -1.369 | 2.826  | -3.277 | -4.394 | -4.964 | 20269  | SCN3A   | NM_018732_2_-1  |
| Gbp3    | -1.581 | -3.233 | -2.231 | -0.366 | -1.500 | -4.603 | -0.877 | -0.724 | 0.358  | -3.946 | 55932  | GBP4    | NM_018734_3_+1  |
| Mre11a  | 2.819  | 3.231  | 3.596  | 3.522  | 3.744  | 3.679  | 3.563  | 3.588  | 3.043  | 3.552  | 17535  | MRE11A  | NM_018736_9_+1  |
| Ctps2   | 3.756  | 4.502  | 3.046  | 2.174  | 3.664  | 3.262  | 4.250  | 4.029  | 6.346  | 6.239  | 55936  | CTPS2   | NM_018737_X_+1  |
| Igtp    | 5.208  | 4.908  | 4.730  | 5.158  | 5.452  | 5.226  | 5.628  | 5.546  | 5.741  | 5.517  | 16145  | NA      | NM_018738_11_+1 |
| Rp9     | 6.718  | 6.365  | 5.707  | 5.174  | 5.908  | 5.563  | 6.050  | 5.414  | 5.852  | 4.732  | 55934  | RP9     | NM_018739_9_-1  |
| Elp5    | 6.387  | 6.294  | 6.481  | 6.486  | 5.979  | 5.979  | 5.978  | 5.882  | 5.006  | 4.911  | 54351  | ELP5    | NM_018740_11_-1 |
| Igfbpl1 | -4.981 | -4.981 | -4.981 | -4.981 | -4.822 | -4.964 | -4.981 | -4.981 | -4.981 | -4.981 | 75426  | IGFBPL1 | NM_018741_4_-1  |
| Bet1l   | 5.272  | 5.112  | 4.706  | 4.683  | 4.545  | 4.712  | 5.184  | 4.944  | 4.573  | 4.264  | 54399  | BET1L   | NM_018742_7_-1  |
| Gpat4   | 4.518  | 4.516  | 5.418  | 5.569  | 5.600  | 5.427  | 5.348  | 5.371  | 5.907  | 5.835  | 102247 | GPAT4   | NM_018743_8_-1  |
| Sema6a  | -1.978 | -3.408 | -3.125 | -2.563 | -2.788 | -2.216 | -2.401 | -1.889 | -4.981 | -4.981 | 20358  | SEMA6A  | NM_018744_18_-1 |
| Azin1   | 5.677  | 5.491  | 5.462  | 5.176  | 5.319  | 5.381  | 5.331  | 5.175  | 5.482  | 5.887  | 54375  | AZIN1   | NM_018745_15_-1 |
| Akap7   | 3.698  | 3.745  | 3.312  | 3.412  | 3.640  | 3.885  | 3.444  | 3.345  | 3.366  | 3.524  | 432442 | AKAP7   | NM_018747_10_-1 |
| Golga4  | 5.288  | 5.173  | 5.703  | 5.512  | 5.845  | 5.870  | 5.600  | 5.629  | 5.610  | 5.631  | 54214  | GOLGA4  | NM_018748_9_+1  |
| Eif3d   | 7.107  | 7.253  | 6.958  | 7.081  | 6.906  | 6.884  | 6.813  | 6.988  | 6.763  | 6.669  | 55944  | EIF3D   | NM_018749_15_-1 |
| Rassf5  | 6.982  | 6.956  | 7.210  | 7.262  | 7.544  | 7.581  | 7.785  | 7.939  | 8.876  | 8.684  | 54354  | RASSF5  | NM_018750_1_-1  |
| Trpm1   | -4.981 | -4.981 | -4.976 | -3.074 | -4.968 | -4.358 | -4.875 | -2.365 | -4.981 | -4.227 | 17364  | TRPM1   | NM_018752_7_+1  |
| Ywhab   | 8.074  | 8.281  | 8.042  | 8.194  | 8.127  | 8.142  | 8.310  | 8.523  | 8.872  | 8.896  | 54401  | YWHAB   | NM_018753_2_+1  |
| Sfn     | -1.142 | -2.883 | -0.846 | -1.848 | -0.993 | -2.917 | -0.840 | -2.196 | 0.276  | -1.787 | 55948  | SFN     | NM_018754_4_-1  |
| Cpq     | 0.800  | -0.381 | 0.549  | 0.837  | -2.428 | -3.301 | -1.067 | -0.067 | -4.648 | -1.855 | 54381  | CPQ     | NM_018755_15_+1 |

|          |        |        |        |        |        |        |        |        |        |        |        |          |                 |
|----------|--------|--------|--------|--------|--------|--------|--------|--------|--------|--------|--------|----------|-----------------|
| Tcstv1   | -0.473 | -0.700 | -4.956 | -4.956 | -4.981 | -4.981 | -4.974 | -4.978 | -4.981 | -4.981 | 54382  | NA       | NM_018756_13_-1 |
| Nme6     | 4.555  | 4.574  | 2.929  | 3.351  | 3.074  | 3.133  | 2.585  | 3.318  | 1.447  | 1.704  | 54369  | NME6     | NM_018757_9_+1  |
| Apha3    | 3.723  | 3.965  | 3.559  | 3.599  | 3.291  | 3.260  | 3.350  | 3.672  | 4.433  | 4.219  | 57267  | APBA3    | NM_018758_10_+1 |
| Zfp326   | 4.092  | 3.330  | 3.695  | 3.746  | 4.020  | 4.134  | 3.612  | 3.382  | 2.165  | 2.527  | 54367  | ZNF326   | NM_018759_5_+1  |
| Slc4a4   | -4.981 | -4.981 | -4.980 | -4.980 | -4.949 | -4.791 | -4.567 | -4.955 | -4.981 | -4.644 | 54403  | SLC4A4   | NM_018760_5_+1  |
| Ctnnal1  | -0.286 | 1.656  | -0.632 | 0.164  | -0.640 | -0.010 | -2.710 | -1.659 | -4.981 | -1.054 | 54366  | CTNNAL1  | NM_018761_4_-1  |
| Gp9      | -1.271 | -1.991 | -1.734 | 0.697  | -1.481 | -0.724 | -0.328 | -0.346 | -0.090 | 0.520  | 54368  | GP9      | NM_018762_6_+1  |
| Chst2    | -1.901 | -4.981 | -1.270 | 1.836  | 1.115  | 1.328  | 2.966  | 2.819  | -4.981 | -2.309 | 54371  | CHST2    | NM_018763_9_-1  |
| Pcdh7    | -4.981 | -4.981 | -3.187 | -4.286 | -4.877 | -4.955 | -4.976 | -3.927 | -4.981 | -3.098 | 54216  | PCDH7    | NM_018764_5_+1  |
| Wbp4     | 5.507  | 5.750  | 5.697  | 5.655  | 5.713  | 5.700  | 5.793  | 5.505  | 5.198  | 5.029  | 22380  | WBP4     | NM_018765_14_-1 |
| Cd160    | 1.249  | -1.593 | -3.420 | -1.935 | -1.995 | -0.770 | -2.681 | 0.342  | -2.575 | -4.086 | 54215  | CD160    | NM_018767_3_-1  |
| Stx8     | 6.397  | 6.416  | 5.881  | 5.916  | 5.435  | 5.484  | 5.776  | 5.605  | 5.248  | 4.888  | 55943  | STX8     | NM_018768_11_+1 |
| Dfna5    | 0.603  | 0.735  | 1.168  | 0.998  | 1.728  | 1.776  | 1.608  | 0.646  | 3.827  | 2.834  | 54722  | DFNA5    | NM_018769_6_-1  |
| Cadm1    | 5.630  | 8.589  | 9.037  | 8.903  | 2.901  | 3.921  | 3.786  | 5.757  | 0.353  | 0.278  | 54725  | CADM1    | NM_018770_9_+1  |
| Gipc1    | 5.669  | 5.894  | 5.134  | 6.141  | 4.975  | 5.262  | 4.819  | 5.514  | 5.248  | 5.254  | 67903  | GIPC1    | NM_018771_8_+1  |
| Bri3     | 2.358  | 2.188  | 1.342  | 0.756  | 2.103  | 1.903  | 2.247  | 1.642  | 2.040  | 1.896  | 55950  | BRI3     | NM_018772_5_+1  |
| Skap2    | 8.340  | 8.521  | 9.011  | 9.093  | 8.750  | 8.691  | 8.179  | 8.081  | 7.907  | 8.124  | 54353  | SKAP2    | NM_018773_6_-1  |
| Phc2     | 0.407  | 0.824  | -0.115 | 1.183  | -0.224 | -1.349 | 0.098  | -3.682 | -0.582 | -0.567 | 54383  | PHC2     | NM_018774_4_+1  |
| Tbcd1d8  | 7.860  | 7.991  | 7.989  | 7.828  | 7.663  | 7.669  | 7.649  | 7.487  | 7.152  | 7.447  | 54610  | TBC1D8   | NM_018775_1_-1  |
| Crlf3    | 6.581  | 6.882  | 6.913  | 7.011  | 8.028  | 7.987  | 7.610  | 7.510  | 7.393  | 7.412  | 54394  | CRLF3    | NM_018776_11_-1 |
| Sfrp5    | -4.981 | -4.981 | -6.981 | -4.981 | -4.749 | -4.916 | -4.963 | -4.972 | -4.981 | -4.981 | 54612  | SFRP5    | NM_018780_19_-1 |
| Egr3     | -3.338 | -2.618 | 2.355  | 2.812  | 3.452  | 4.680  | 1.375  | 0.877  | -4.707 | -3.626 | 13655  | EGR3     | NM_018781_14_+1 |
| Calclr   | 2.718  | 3.175  | 3.626  | 3.806  | 3.625  | 3.115  | 3.247  | 3.321  | 3.711  | 3.884  | 54598  | CALCLR   | NM_018782_2_-1  |
| Tfip11   | 3.900  | 4.173  | 4.502  | 4.466  | 4.715  | 4.516  | 4.685  | 4.831  | 5.079  | 5.171  | 54723  | TFIP11   | NM_018783_5_+1  |
| St3gal6  | 5.806  | 6.114  | 1.831  | 2.447  | 1.933  | 2.896  | 2.149  | 3.639  | 0.816  | 1.009  | 54613  | ST3GAL6  | NM_018784_16_-1 |
| Prpf40a  | 6.802  | 6.902  | 7.386  | 7.399  | 7.340  | 7.246  | 7.136  | 6.962  | 6.801  | 6.904  | 56194  | PRPF40A  | NM_018785_2_-1  |
| Prpf40b  | 2.765  | 2.208  | 1.852  | 1.972  | 2.056  | 2.258  | 1.529  | 1.351  | -0.808 | -0.131 | 54614  | PRPF40B  | NM_018786_15_+1 |
| Npff     | 0.233  | 0.178  | -1.171 | -2.388 | -1.831 | -2.498 | -0.857 | -2.001 | 0.019  | -1.105 | 54615  | NPFF     | NM_018787_15_-1 |
| Extl3    | 3.503  | 3.888  | 6.189  | 6.218  | 4.641  | 4.866  | 4.996  | 4.896  | 4.979  | 4.371  | 54616  | EXTL3    | NM_018788_14_-1 |
| Foxo4    | 1.353  | 1.226  | -0.116 | -0.516 | 1.964  | 1.808  | 1.956  | 1.152  | 0.685  | 1.065  | 54601  | FOXO4    | NM_018789_X_+1  |
| Arc      | -2.515 | -2.616 | 2.104  | 2.465  | -1.402 | -4.027 | -0.907 | -3.981 | -2.897 | -4.099 | 11838  | ARC      | NM_018790_15_-1 |
| Zfp108   | 0.584  | -0.686 | 0.626  | -0.002 | -1.144 | -1.857 | -0.574 | -1.533 | -0.077 | 0.278  | 54678  | NA       | NM_018791_7_+1  |
| Tyk2     | 5.432  | 5.230  | 6.925  | 6.957  | 6.076  | 5.882  | 6.011  | 5.985  | 7.263  | 7.203  | 54721  | TYK2     | NM_018793_9_-1  |
| Atp6ap1  | 8.078  | 8.366  | 7.413  | 7.542  | 7.783  | 8.034  | 8.082  | 8.601  | 9.127  | 9.253  | 54411  | ATP6AP1  | NM_018794_X_+1  |
| Eef1b2   | 7.849  | 7.907  | 9.366  | 9.270  | 7.736  | 7.835  | 7.984  | 7.899  | 6.642  | 6.651  | 55949  | EEF1B2   | NM_018796_1_+1  |
| Plxnc1   | 5.933  | 5.766  | 6.956  | 7.007  | 8.800  | 8.701  | 7.892  | 6.838  | 4.001  | 3.680  | 54712  | PLXNC1   | NM_018797_10_-1 |
| Ubqln2   | 3.918  | 4.318  | 3.190  | 3.450  | 3.456  | 3.723  | 3.632  | 3.338  | 2.614  | 3.317  | 54609  | UBQLN2   | NM_018798_X_+1  |
| Eif3i    | 7.151  | 7.023  | 7.078  | 7.154  | 6.568  | 6.510  | 6.647  | 6.763  | 6.255  | 5.772  | 54709  | EIF3I    | NM_018799_4_-1  |
| Syt11    | 2.045  | 1.326  | 2.997  | 2.813  | 3.151  | 2.967  | 3.355  | 3.151  | 3.293  | 3.180  | 229521 | SYT11    | NM_018804_3_-1  |
| Hs3st3b1 | 3.479  | 3.903  | -0.042 | -0.308 | 2.494  | 2.956  | 1.073  | 1.458  | 0.455  | 1.198  | 54710  | HS3ST3B1 | NM_018805_11_-1 |
| Plagl2   | 3.431  | 3.379  | 4.544  | 4.517  | 3.919  | 3.630  | 4.591  | 4.665  | 5.999  | 6.146  | 54711  | PLAGL2   | NM_018807_2_-1  |
| Dnajb1   | 6.940  | 6.798  | 7.009  | 7.148  | 7.680  | 7.126  | 7.030  | 6.760  | 5.931  | 6.008  | 81489  | DNAJB1   | NM_018808_8_+1  |
| Mkrrn1   | 6.948  | 6.960  | 7.260  | 7.380  | 8.213  | 8.360  | 7.751  | 7.688  | 7.813  | 7.822  | 54484  | MKRRN1   | NM_018810_6_-1  |
| Abhd2    | 2.415  | 2.158  | 2.158  | 2.319  | 1.974  | 2.052  | 1.696  | 2.079  | 2.342  | 1.958  | 54608  | ABHD2    | NM_018811_7_+1  |
| Pias3    | 1.198  | 3.310  | 2.396  | 2.812  | 3.126  | 2.667  | 2.662  | 1.592  | 2.230  | 2.834  | 229615 | PIAS3    | NM_018812_3_+1  |
| Cpsf3    | 6.228  | 5.967  | 6.625  | 6.686  | 6.846  | 6.576  | 6.691  | 6.435  | 6.808  | 6.284  | 54451  | CPSF3    | NM_018813_12_+1 |
| Pcnx1    | 4.348  | 4.800  | 3.597  | 3.271  | 3.870  | 3.770  | 4.532  | 4.179  | 6.141  | 6.111  | 54604  | PCNX1    | NM_018814_12_+1 |
| Nup210   | 5.949  | 5.453  | 7.086  | 6.954  | 7.579  | 7.320  | 6.668  | 6.991  | 5.414  | 6.376  | 54563  | NUP210   | NM_018815_6_-1  |
| Smardc1  | 3.887  | 4.054  | 3.951  | 4.306  | 4.115  | 4.267  | 4.145  | 3.845  | 4.179  | 4.096  | 54380  | SMARCD1  | NM_018817_1_+1  |
| Chm      | 4.389  | 4.209  | 4.696  | 4.633  | 5.202  | 5.178  | 4.990  | 4.730  | 4.827  | 5.244  | 12662  | CHM      | NM_018818_X_-1  |
| Mpc1     | 8.498  | 8.204  | 7.201  | 7.094  | 7.747  | 6.712  | 7.577  | 6.727  | 6.861  | 5.985  | 55951  | MPC1     | NM_018819_17_+1 |
| Sertad1  | 6.685  | 6.549  | 3.630  | 3.667  | 4.157  | 4.354  | 4.858  | 5.074  | 5.450  | 5.150  | 55942  | SERTAD1  | NM_018820_7_+1  |
| Socs6    | 3.735  | 3.827  | 4.413  | 4.388  | 3.759  | 3.672  | 4.284  | 4.737  | 6.460  | 6.546  | 54607  | SOC6     | NM_018821_18_-1 |
| Sgsh     | 5.196  | 4.821  | 4.968  | 4.855  | 5.118  | 5.363  | 5.308  | 4.621  | 5.126  | 4.859  | 27029  | SGSH     | NM_018822_11_-1 |
| Nfat5    | 2.088  | 2.520  | 2.882  | 2.617  | 3.132  | 3.513  | 3.649  | 1.652  | 2.741  | 3.599  | 54446  | NFAT5    | NM_018823_8_+1  |
| Slc23a2  | 4.923  | 5.415  | 4.024  | 4.404  | 4.156  | 4.665  | 4.070  | 4.348  | 4.507  | 5.084  | 54338  | SLC23A2  | NM_018824_2_-1  |
| Sh2b2    | 4.878  | 5.056  | 3.706  | 3.691  | 3.698  | 3.611  | 3.362  | 2.779  | 4.254  | 3.948  | 23921  | SH2B2    | NM_018825_5_-1  |
| Crlf1    | -2.278 | -0.387 | -4.952 | -3.859 | -4.968 | -3.517 | -3.960 | -3.040 | -4.981 | -4.981 | 12931  | CRLF1    | NM_018827_8_+1  |
| Fnbp4    | 5.804  | 5.819  | 6.582  | 6.247  | 6.867  | 6.685  | 6.479  | 6.147  | 6.443  | 6.263  | 55935  | FNBPA4   | NM_018828_2_+1  |
| Ap3m1    | 6.176  | 6.285  | 6.080  | 6.123  | 6.004  | 6.252  | 5.835  | 6.113  | 6.817  | 7.012  | 55946  | AP3M1    | NM_018829_14_-1 |
| Asah2    | 0.918  | -0.293 | 0.506  | -0.265 | -2.998 | -3.577 | -1.813 | -2.748 | -0.922 | -0.682 | 54447  | ASAH2    | NM_018830_19_-1 |
| Dclre1a  | 2.845  | 1.756  | 4.116  | 3.832  | 3.371  | 3.339  | 3.058  | 3.350  | 3.970  | 3.683  | 55947  | DCLRE1A  | NM_018831_19_-1 |
| Magix    | -4.981 | -4.981 | -4.928 | -4.570 | -4.972 | -4.782 | -4.571 | -4.934 | -4.981 | -4.981 | 54634  | MAGIX    | NM_018832_X_-1  |
| Samhd1   | 6.887  | 6.779  | 7.738  | 7.676  | 8.140  | 8.239  | 7.745  | 7.383  | 8.312  | 8.013  | 56045  | SAMHD1   | NM_018851_2_-1  |
| Rplp1    | 8.967  | 8.055  | 9.434  | 8.776  | 9.120  | 8.495  | 9.312  | 8.553  | 7.805  | 6.950  | 56040  | NA       | NM_018853_9_-1  |
| Ift20    | 6.422  | 6.254  | 5.342  | 5.205  | 5.132  | 5.356  | 5.218  | 5.285  | 4.500  | 4.556  | 55978  | IFT20    | NM_018854_11_+1 |
| Gas8     | 3.942  | 3.992  | 3.086  | 3.118  | 2.242  | 2.389  | 1.927  | 2.495  | 2.567  | 2.775  | 104346 | GAS8     | NM_018855_8_+1  |
| Pebp1    | 7.711  | 7.541  | 7.160  | 7.308  | 6.978  | 7.109  | 6.640  | 6.875  | 5.493  | 5.279  | 23980  | PEBP1    | NM_018858_5_-1  |
| Akr1e1   | 4.936  | 2.717  | 3.573  | 1.242  | 3.440  | 0.593  | 3.163  | 0.757  | 1.886  | 0.540  | 56043  | AKR1E2   | NM_018859_13_-1 |
| Rpl41    | 9.740  | 9.775  | 10.024 | 9.942  | 9.797  | 9.792  | 9.965  | 9.982  | 9.084  | 8.855  | 67945  | NA       | NM_018860_10_-1 |
| Slc1a4   | -2.573 | -2.895 | -0.732 | -1.199 | -0.532 | -1.434 | -0.338 | -0.500 | -1.319 | -1.161 | 55963  | SLC1A4   | NM_018861_11_-1 |
| Agpat1   | 2.214  | 2.680  | 2.786  | 3.500  | 3.235  | 3.479  | 2.576  | 1.725  | 2.114  | 2.212  | 55979  | AGPAT1   | NM_018862_17_+1 |
| Pdyn     | -4.981 | -4.981 | -4.949 | -1.722 | -4.963 | -4.963 | -4.977 | -4.980 | -4.981 | -4.981 | 18610  | PDYN     | NM_018863_2_-1  |
| Impa1    | 6.367  | 6.481  | 5.990  | 6.249  | 6.432  | 6.428  | 6.073  | 6.021  | 5.695  | 5.795  | 55980  | IMPA1    | NM_018864_3_-1  |

|          |        |        |        |        |        |        |        |        |        |        |        |          |                 |
|----------|--------|--------|--------|--------|--------|--------|--------|--------|--------|--------|--------|----------|-----------------|
| Cxcl13   | 3.738  | -1.693 | -1.969 | -2.501 | -2.802 | -3.560 | -2.433 | -1.812 | -1.810 | -4.981 | 55985  | CXCL13   | NM_018866_5_+1  |
| Nop58    | 5.885  | 5.672  | 6.115  | 6.273  | 6.144  | 6.135  | 5.469  | 5.715  | 3.934  | 3.663  | 55989  | NOP58    | NM_018868_1_+1  |
| Grk5     | -4.981 | -3.315 | 2.539  | 2.789  | 1.669  | 0.019  | 3.272  | 3.288  | 5.256  | 5.042  | 14773  | GRK5     | NM_018869_19_+1 |
| Pgam2    | 7.759  | 6.065  | 0.771  | 1.123  | 0.001  | 2.327  | -0.883 | 0.462  | 1.502  | 1.471  | 56012  | PGAM2    | NM_018870_11_-1 |
| Ywhag    | 5.497  | 5.648  | 6.619  | 6.683  | 6.271  | 6.518  | 6.401  | 6.195  | 6.924  | 6.804  | 22628  | YWHAG    | NM_018871_5_-1  |
| Tmem131  | 3.930  | 3.919  | 6.950  | 6.603  | 7.217  | 7.065  | 6.765  | 6.317  | 6.413  | 6.799  | 56030  | TMEM131  | NM_018872_1_-1  |
| Srcin1   | -3.843 | -4.981 | -4.959 | -4.959 | -4.980 | -4.969 | -3.088 | -3.679 | -4.981 | -2.946 | 56013  | SRCIN1   | NM_018873_11_-1 |
| Snx12    | 5.394  | 5.512  | 3.972  | 4.206  | 3.827  | 4.019  | 4.209  | 3.864  | 3.557  | 3.705  | 55988  | SNX12    | NM_018875_X_-1  |
| Fut2     | -4.981 | -4.981 | -4.229 | -2.361 | -4.336 | -3.398 | -4.973 | -4.027 | -4.981 | -4.981 | 14344  | FUT2     | NM_018876_7_-1  |
| Setdb1   | 2.874  | 2.739  | 4.444  | 3.752  | 4.167  | 3.761  | 4.599  | 3.561  | 5.026  | 4.092  | 84505  | SETDB1   | NM_018877_3_-1  |
| Paxip1   | 3.764  | 3.644  | 3.958  | 3.714  | 4.447  | 4.085  | 4.045  | 4.099  | 4.999  | 4.764  | 55982  | NA       | NM_018878_5_-1  |
| Nprl2    | 5.201  | 5.205  | 4.266  | 4.087  | 4.465  | 3.928  | 4.005  | 4.109  | 4.105  | 3.873  | 56032  | NPRL2    | NM_018879_9_+1  |
| Trim3    | 2.778  | 3.123  | 3.181  | 2.325  | 1.529  | 1.184  | 2.333  | 2.222  | 3.636  | 2.726  | 55992  | TRIM3    | NM_018880_7_-1  |
| Adgrg1   | -0.290 | -0.870 | -3.329 | -0.022 | -1.838 | -1.259 | -0.189 | -1.944 | 0.164  | -0.431 | 14766  | ADGRG1   | NM_018882_8_+1  |
| Camkk1   | -0.418 | 0.495  | 2.211  | 1.878  | 3.639  | 2.916  | 2.323  | 1.908  | 1.321  | 0.642  | 55984  | CAMKK1   | NM_018883_11_+1 |
| Lgals8   | 4.129  | 4.571  | 2.039  | 2.872  | 3.811  | 3.478  | 4.093  | 4.470  | 4.299  | 4.856  | 56048  | LGALS8   | NM_018886_13_-1 |
| Cyp39a1  | -4.558 | -4.981 | -4.572 | -2.701 | -1.539 | -0.960 | 0.156  | 1.304  | 1.830  | 3.106  | 56050  | CYP39A1  | NM_018887_17_+1 |
| Uqcc1    | 4.706  | 4.205  | 5.406  | 4.703  | 4.753  | 4.451  | 4.532  | 4.140  | 4.401  | 3.797  | 56046  | UQCC1    | NM_018888_2_-1  |
| Pigb     | 2.296  | 2.690  | 2.669  | 2.736  | 2.535  | 2.606  | 2.419  | 2.419  | 2.872  | 2.913  | 55981  | PIGB     | NM_018889_9_-1  |
| Cd86     | 4.158  | 3.097  | 8.851  | 8.892  | 6.786  | 7.515  | 6.304  | 7.093  | 5.354  | 5.257  | 12524  | CD86     | NM_019388_16_-1 |
| Vcan     | -4.981 | -4.981 | -4.965 | -4.808 | -4.929 | -2.853 | -4.533 | -1.159 | 6.205  | 6.675  | 13003  | VCAN     | NM_019389_13_-1 |
| Lmna     | -0.313 | -4.430 | 2.473  | 3.011  | -1.123 | -1.210 | 0.764  | 0.457  | -3.013 | -0.515 | 16905  | LMNA     | NM_019390_3_-1  |
| Lsp1     | -1.539 | -4.981 | -0.468 | -0.981 | -1.185 | -1.552 | -2.727 | -3.729 | -4.969 | -3.664 | 16985  | LSP1     | NM_019391_7_+1  |
| Tyro3    | -4.981 | -4.981 | -4.811 | -4.301 | -4.592 | -3.676 | -4.626 | -3.502 | -4.981 | -4.981 | 22174  | TYRO3    | NM_019392_2_+1  |
| Exosc9   | 5.951  | 5.357  | 5.303  | 4.903  | 5.422  | 5.046  | 5.363  | 4.721  | 4.653  | 3.987  | 50911  | EXOSC9   | NM_019393_3_+1  |
| Mia      | -4.981 | -4.981 | -4.584 | -4.179 | -4.977 | -4.977 | -4.970 | -4.431 | -4.190 | -3.498 | 12587  | MIA      | NM_019394_7_-1  |
| Fbp1     | -4.981 | 2.738  | -4.962 | -2.218 | -4.999 | -3.035 | -4.959 | -0.985 | -1.106 | 1.637  | 14121  | FBP1     | NM_019395_13_-1 |
| Cyhr1    | 4.557  | 4.331  | 4.026  | 3.934  | 4.329  | 4.011  | 4.046  | 3.832  | 4.144  | 3.992  | 54151  | CYHR1    | NM_019396_15_-1 |
| Egfl6    | -3.563 | -2.133 | -4.969 | -3.596 | -1.920 | 0.877  | -3.359 | -2.910 | -4.981 | -1.848 | 54156  | EGFL6    | NM_019397_X_-1  |
| Rnase2b  | 0.338  | -4.981 | -4.981 | -4.981 | -4.981 | -4.981 | -4.772 | -4.975 | 1.680  | -3.378 | 54159  | RNASE2   | NM_019398_14_+1 |
| Rabep1   | 5.854  | 6.008  | 5.972  | 5.585  | 6.115  | 6.253  | 5.724  | 5.520  | 5.024  | 5.233  | 54189  | RABEP1   | NM_019400_11_+1 |
| Nmi      | 2.835  | 1.623  | 2.678  | 2.010  | 3.362  | 1.458  | 2.582  | 1.916  | 1.559  | 1.813  | 64685  | NMI      | NM_019401_2_-1  |
| Pabpn1   | 6.652  | 6.661  | 6.528  | 6.571  | 6.822  | 6.816  | 6.717  | 6.662  | 6.041  | 6.075  | 54196  | PABPN1   | NM_019402_14_+1 |
| Rnf5     | 6.849  | 7.116  | 6.055  | 6.370  | 6.166  | 6.494  | 5.981  | 6.162  | 5.761  | 5.861  | 54197  | RNF5     | NM_019403_17_-1 |
| Avpr2    | -4.751 | -4.981 | -3.710 | -2.084 | -2.532 | -3.437 | -4.009 | -2.342 | -0.148 | -1.686 | 12000  | AVPR2    | NM_019404_X_+1  |
| Cetn2    | 7.192  | 7.227  | 5.930  | 5.766  | 6.227  | 6.272  | 5.945  | 5.813  | 5.052  | 5.043  | 26370  | CETN2    | NM_019405_X_-1  |
| Fnbp1    | 2.033  | 0.697  | 4.476  | 4.366  | 2.633  | 2.489  | 2.186  | 2.109  | 1.497  | 0.612  | 14269  | FNBP1    | NM_019406_2_-1  |
| Nfkb2    | 2.032  | 0.149  | 2.789  | 2.184  | 3.674  | 2.840  | 3.385  | 3.288  | 2.794  | 3.644  | 18034  | NFKB2    | NM_019408_19_+1 |
| Omg      | -0.896 | -2.344 | -1.436 | -2.787 | -2.180 | -1.488 | -0.920 | -3.179 | -0.876 | -1.424 | 18377  | OMG      | NM_019409_11_-1 |
| Pfn2     | 1.991  | 2.630  | 0.220  | 0.845  | 2.252  | 2.116  | 1.369  | -0.007 | -1.189 | -1.530 | 18645  | PFN2     | NM_019410_3_-1  |
| Ppp2ca   | 8.535  | 8.562  | 8.502  | 8.456  | 8.618  | 8.626  | 8.302  | 8.417  | 8.378  | 8.541  | 19052  | PPP2CA   | NM_019411_11_+1 |
| Prx      | -4.981 | -4.981 | -4.981 | -4.981 | -4.981 | -4.981 | -4.941 | -3.962 | -4.971 | -4.981 | 19153  | PRX      | NM_019412_7_+1  |
| Robo1    | -4.981 | -4.981 | -4.961 | -4.961 | -4.978 | -4.923 | -3.244 | -4.365 | -4.981 | -4.981 | 19876  | ROBO1    | NM_019413_16_+1 |
| Selenbp2 | -4.981 | -3.093 | -4.973 | -2.535 | -4.786 | -2.807 | -4.737 | -0.814 | -2.981 | 1.156  | 20342  | SELENBP1 | NM_019414_3_+1  |
| Slc12a3  | 0.955  | 0.094  | 0.709  | 1.394  | 0.515  | 1.135  | -1.841 | -3.162 | -3.552 | -4.981 | 20497  | SLC12A3  | NM_019415_8_+1  |
| Pdlim4   | 1.753  | 1.386  | 2.816  | 6.216  | 2.771  | 3.598  | 4.211  | 5.712  | 3.056  | 6.499  | 30794  | PDLM4    | NM_019417_11_-1 |
| Tnfsf14  | -3.028 | -4.981 | 1.058  | 0.910  | 3.477  | 3.205  | 3.526  | 2.753  | 3.368  | 3.324  | 50930  | TNFSF14  | NM_019418_17_-1 |
| Arl6ip1  | 8.027  | 8.296  | 8.371  | 8.619  | 8.353  | 8.441  | 8.323  | 8.471  | 8.276  | 8.372  | 54208  | ARL6IP1  | NM_019419_7_-1  |
| B3galt4  | 3.820  | 3.568  | 3.679  | 3.375  | 3.371  | 3.193  | 3.922  | 3.789  | 4.591  | 4.290  | 54218  | B3GALT4  | NM_019420_17_-1 |
| Cd320    | 3.477  | 3.621  | 3.095  | 3.142  | 2.660  | 2.575  | 2.416  | 2.919  | 1.151  | 1.479  | 54219  | CD320    | NM_019421_17_+1 |
| Elov1    | 7.203  | 7.342  | 6.994  | 6.990  | 6.658  | 6.788  | 6.840  | 7.172  | 7.042  | 7.167  | 54325  | ELOVL1   | NM_019422_4_+1  |
| Elov12   | -4.981 | -4.981 | -4.981 | -4.981 | -3.881 | -4.506 | -4.848 | -4.916 | -2.022 | -4.981 | 54326  | ELOVL2   | NM_019423_13_-1 |
| Hps1     | 5.141  | 5.228  | 5.149  | 5.050  | 5.761  | 5.795  | 5.451  | 5.101  | 5.569  | 5.180  | 192236 | HPS1     | NM_019424_19_-1 |
| Gnpnat1  | 5.603  | 5.701  | 5.772  | 5.710  | 5.336  | 5.400  | 5.413  | 5.093  | 4.429  | 4.351  | 54342  | GNPNAT1  | NM_019425_14_-1 |
| Atf7ip   | 4.409  | 4.830  | 5.255  | 5.515  | 5.386  | 5.481  | 5.266  | 5.533  | 5.913  | 6.250  | 54343  | ATF7IP   | NM_019426_6_+1  |
| Epb41l4b | -1.334 | -3.408 | -1.395 | -0.880 | 0.385  | 0.750  | -0.701 | -1.705 | -1.455 | -4.981 | 54357  | EPB41L4B | NM_019427_4_-1  |
| Rpp30    | 5.242  | 5.211  | 4.493  | 4.568  | 4.709  | 4.422  | 4.754  | 4.717  | 3.755  | 3.823  | 54364  | RPP30    | NM_019428_19_+1 |
| Prss16   | -4.981 | 0.709  | -2.528 | -0.907 | -4.527 | -3.638 | -1.070 | 0.355  | -1.093 | -3.205 | 54373  | PRSS16   | NM_019429_13_-1 |
| Tmem37   | 0.599  | -0.023 | 0.137  | -1.578 | 1.136  | -0.881 | 1.519  | 3.099  | 1.281  | 3.156  | 170706 | TMEM37   | NM_019432_1_-1  |
| Mcm3ap   | 4.001  | 4.148  | 4.366  | 4.465  | 4.427  | 4.726  | 4.549  | 4.487  | 4.367  | 4.477  | 54387  | MCM3AP   | NM_019434_10_+1 |
| Ndufb11  | 7.881  | 7.808  | 7.850  | 7.972  | 6.993  | 7.179  | 7.281  | 7.226  | 6.326  | 6.237  | 104130 | NDUFB11  | NM_019435_X_-1  |
| Sit1     | 4.961  | 5.073  | -0.078 | -0.374 | -3.569 | 1.031  | -1.820 | 1.951  | -1.151 | -1.443 | 54390  | SIT1     | NM_019436_4_-1  |
| Rfk      | 6.614  | 6.908  | 6.135  | 6.341  | 5.634  | 5.964  | 5.726  | 6.188  | 5.857  | 6.397  | 54391  | RFK      | NM_019437_19_+1 |
| Ncapg    | -2.366 | -1.583 | 3.234  | 2.932  | 4.058  | 3.120  | 3.669  | 3.041  | 1.649  | 1.351  | 54392  | NCAPG    | NM_019438_5_+1  |
| Gabbr1   | 0.453  | 1.648  | 3.587  | 3.535  | 3.977  | 4.787  | 2.499  | 2.280  | -1.630 | -3.138 | 54393  | GABBR1   | NM_019439_17_+1 |
| Irgm2    | 2.317  | 0.978  | 3.798  | 3.063  | 4.442  | 3.378  | 4.846  | 3.779  | 5.766  | 4.706  | 54396  | IRGM2    | NM_019440_11_+1 |
| Ppt2     | -3.814 | -0.354 | 1.094  | 0.824  | -2.399 | -1.597 | -1.268 | -1.250 | -0.080 | 0.800  | 54397  | PPT2     | NM_019441_17_-1 |
| Stk19    | 4.840  | 4.579  | 4.262  | 4.097  | 4.330  | 4.271  | 4.032  | 3.781  | 3.756  | 3.205  | 54402  | STK19    | NM_019442_17_-1 |
| Ndufa1   | 8.101  | 7.943  | 7.441  | 7.289  | 7.155  | 7.383  | 7.529  | 7.363  | 6.641  | 6.412  | 54405  | NDUFA1   | NM_019443_X_-1  |
| Ramp2    | 0.514  | -1.620 | -2.497 | -2.506 | -3.574 | -2.254 | -2.275 | -1.965 | -4.981 | -3.853 | 54409  | RAMP2    | NM_019444_11_+1 |
| Barhl1   | -4.981 | -4.981 | -4.974 | -4.980 | -4.928 | -4.978 | -4.981 | -4.981 | -4.981 | -4.981 | 54422  | BARHL1   | NM_019446_2_-1  |
| Hgfac    | -1.978 | -4.981 | 3.157  | 2.624  | 2.938  | 2.583  | 1.619  | -0.863 | -3.531 | -4.981 | 54426  | HGFAC    | NM_019447_5_+1  |
| Dnmt3l   | -4.981 | -4.981 | -4.967 | -4.967 | -4.909 | -4.972 | -4.975 | -4.978 | -4.981 | -3.542 | 54427  | DNMT3L   | NM_019448_10_+1 |
| Unc93b1  | 9.899  | 9.994  | 9.605  | 9.766  | 9.578  | 9.690  | 9.340  | 9.514  | 10.027 | 9.757  | 54445  | UNC93B1  | NM_019449_19_+1 |

|          |        |        |        |        |        |        |        |        |        |        |       |          |                 |
|----------|--------|--------|--------|--------|--------|--------|--------|--------|--------|--------|-------|----------|-----------------|
| Mefv     | -4.981 | -4.981 | 1.456  | 0.117  | 1.568  | 1.852  | 1.804  | -0.519 | 2.110  | 2.311  | 54483 | MEFV     | NM_019453_16_-1 |
| Dll4     | 3.879  | 3.884  | -2.374 | -1.885 | -0.235 | 0.703  | -1.796 | -2.943 | -2.022 | -2.750 | 54485 | DLL4     | NM_019454_2_+1  |
| Hpgds    | 4.148  | 3.227  | 3.383  | 4.561  | 4.711  | 5.603  | 3.797  | 3.703  | -1.711 | -0.442 | 54486 | HPGDS    | NM_019455_6_-1  |
| Apbb1ip  | 5.773  | 5.728  | 5.477  | 5.394  | 6.809  | 6.919  | 6.555  | 6.360  | 6.565  | 6.665  | 54519 | APBB1IP  | NM_019456_2_+1  |
| Paf1     | 5.908  | 6.008  | 5.571  | 5.675  | 5.919  | 5.909  | 5.774  | 5.703  | 5.599  | 5.565  | 54624 | PAF1     | NM_019458_7_+1  |
| Nphs1    | -4.981 | -4.981 | -4.599 | -4.068 | -3.896 | -4.737 | -3.326 | -4.884 | -4.981 | -4.981 | 54631 | NPHS1    | NM_019459_7_+1  |
| Sfmbt1   | -0.971 | 0.636  | -1.978 | -2.280 | -2.280 | -3.053 | -1.460 | -0.199 | -1.707 | 1.228  | 54650 | SFMBT1   | NM_019460_14_+1 |
| Usp27x   | -3.563 | -0.312 | -1.246 | -1.245 | -1.897 | -1.008 | -0.942 | -2.050 | -0.876 | -0.142 | 54651 | USP27X   | NM_019461_X_-1  |
| Sh3glb1  | 6.710  | 6.850  | 6.980  | 7.045  | 7.329  | 7.514  | 7.303  | 7.146  | 7.032  | 7.588  | 54673 | SH3GLB1  | NM_019464_3_-1  |
| Crtam    | -3.254 | -4.981 | -4.948 | -3.764 | -4.730 | -4.472 | -4.966 | -2.611 | -4.252 | -3.692 | 54698 | CRTAM    | NM_019465_9_-1  |
| Rcan1    | 1.917  | 0.259  | 0.511  | 2.844  | 2.705  | 3.278  | 3.985  | 4.797  | 3.504  | 4.523  | 54720 | RCAN1    | NM_019466_16_-1 |
| Aif1     | 5.350  | 3.719  | 9.151  | 9.633  | 5.524  | 5.964  | 7.966  | 8.704  | 6.471  | 6.881  | 11629 | AIF1     | NM_019467_17_-1 |
| G6pd2    | -4.981 | -4.981 | -4.981 | -4.981 | -4.981 | -4.981 | -4.972 | -4.591 | -3.584 | -2.990 | 14380 | NA       | NM_019468_5_+1  |
| Myo10    | 3.778  | 3.908  | 0.682  | 1.310  | 1.942  | 1.306  | 1.662  | 1.629  | -0.492 | 0.665  | 17909 | MYO10    | NM_019472_15_+1 |
| Acs14    | 4.533  | 5.154  | 4.752  | 4.358  | 3.642  | 4.161  | 3.796  | 4.088  | 4.377  | 4.384  | 50790 | ACSL4    | NM_019477_X_-1  |
| Pqbp1    | 4.534  | 4.567  | 3.942  | 4.092  | 3.937  | 3.839  | 3.758  | 4.113  | 2.931  | 3.326  | 54633 | PQBP1    | NM_019478_X_-1  |
| Hes6     | 6.892  | 7.085  | 5.645  | 5.635  | 5.838  | 5.937  | 5.509  | 5.523  | 5.110  | 4.927  | 55927 | HES6     | NM_019479_1_-1  |
| Ebag9    | 5.036  | 5.241  | 4.306  | 4.253  | 4.586  | 4.746  | 4.457  | 4.268  | 3.741  | 4.142  | 55960 | EBAG9    | NM_019480_15_+1 |
| Panx1    | 5.909  | 6.319  | 4.053  | 3.979  | 5.379  | 5.326  | 5.431  | 5.373  | 5.163  | 5.444  | 55991 | PANX1    | NM_019482_9_-1  |
| Alyref2  | 5.083  | 4.681  | 3.958  | 3.654  | 4.312  | 4.141  | 3.846  | 3.648  | 3.200  | 3.123  | 56009 | NA       | NM_019484_1_+1  |
| Hebp2    | -4.981 | -4.981 | -0.131 | -0.224 | -2.911 | -3.229 | -2.922 | -2.936 | -4.981 | -4.981 | 56016 | HEBP2    | NM_019487_10_-1 |
| Slc2a8   | 2.922  | 3.639  | 3.181  | 3.416  | 3.317  | 3.687  | 3.243  | 3.911  | 3.485  | 3.667  | 56017 | SLC2A8   | NM_019488_2_-1  |
| Ppie     | 6.019  | 6.103  | 5.466  | 5.539  | 5.975  | 6.328  | 5.525  | 5.476  | 4.745  | 4.291  | 56031 | PIPIE    | NM_019489_4_-1  |
| Uso1     | 6.077  | 6.156  | 5.885  | 6.109  | 5.425  | 5.367  | 5.475  | 5.676  | 6.005  | 6.573  | 56041 | USO1     | NM_019490_5_+1  |
| Rala     | 6.692  | 6.914  | 8.784  | 8.745  | 7.669  | 7.739  | 7.313  | 6.967  | 6.038  | 6.458  | 56044 | RALA     | NM_019491_13_-1 |
| Rgs3     | -4.810 | -4.854 | 0.726  | 0.143  | 3.613  | 4.162  | 1.941  | 0.231  | -4.848 | -2.552 | 50780 | RGS3     | NM_019492_4_+1  |
| Cxcl11   | -4.981 | -4.981 | 0.458  | -0.064 | -2.823 | -4.342 | 0.244  | -1.168 | -2.427 | -3.446 | 56066 | NA       | NM_019494_5_-1  |
| Ammeocr1 | 1.742  | 1.915  | 3.204  | 3.036  | 2.436  | 2.479  | 2.448  | 2.600  | 2.579  | 3.174  | 56068 | AMMEOCR1 | NM_019496_X_-1  |
| Grk4     | 0.484  | 1.131  | -2.559 | -2.584 | -1.106 | -0.241 | -0.754 | -0.510 | 0.011  | 0.200  | 14772 | GRK4     | NM_019497_5_+1  |
| Olfm1    | -3.469 | -1.335 | 5.441  | 6.582  | 2.654  | 2.112  | 5.952  | 6.955  | 7.427  | 8.024  | 56177 | OLFM1    | NM_019498_2_+1  |
| Mad2l1   | 3.828  | 3.534  | 4.485  | 4.537  | 4.662  | 4.073  | 4.101  | 3.926  | 2.766  | 2.459  | 56150 | MAD2L1   | NM_019499_6_+1  |
| Pdss1    | 2.673  | 2.530  | 2.474  | 2.572  | 1.992  | 1.520  | 1.883  | 1.972  | 2.516  | 2.044  | 56075 | PDSS1    | NM_019501_2_+1  |
| Timm10b  | 7.060  | 6.603  | 6.525  | 6.040  | 6.014  | 6.080  | 6.431  | 6.250  | 5.871  | 5.833  | 14356 | TIMM10B  | NM_019502_7_+1  |
| Fxyd1    | -4.981 | -4.981 | -4.063 | -4.349 | -4.915 | -4.974 | -4.744 | -4.673 | -4.981 | -4.981 | 56188 | FXYD1    | NM_019503_7_-1  |
| Dgke     | 5.433  | 6.415  | 3.494  | 3.241  | 3.046  | 2.692  | 2.789  | 2.675  | 2.063  | 1.869  | 56077 | DGKE     | NM_019505_11_-1 |
| Tbx21    | -0.779 | -3.315 | 0.158  | -1.448 | 5.170  | 4.597  | 3.371  | 1.376  | -1.695 | -4.981 | 57765 | TBX21    | NM_019507_11_-1 |
| Ramp3    | -0.244 | 1.746  | -1.634 | -2.100 | -1.715 | -1.045 | -1.835 | -0.981 | -1.532 | -3.386 | 56089 | RAMP3    | NM_019511_11_+1 |
| Lgals12  | -4.981 | -4.981 | -4.801 | -4.922 | -4.981 | -4.981 | -4.974 | -4.978 | -4.981 | -4.981 | 56072 | LGALS12  | NM_019516_19_-1 |
| Bace2    | -3.028 | -4.981 | -4.889 | -2.658 | -4.986 | -4.561 | -4.933 | -3.697 | -4.981 | -3.210 | 56175 | BACE2    | NM_019517_16_+1 |
| Grasp    | 2.598  | 3.830  | 3.149  | 3.098  | 5.142  | 4.662  | 3.464  | 3.050  | 1.216  | 0.447  | 56149 | GRASP    | NM_019518_15_+1 |
| Rabggta  | 3.689  | 4.006  | 5.350  | 5.344  | 4.991  | 5.094  | 5.041  | 5.434  | 5.876  | 5.608  | 56187 | RABGGTA  | NM_019519_14_-1 |
| Gas6     | -0.257 | -0.927 | -1.973 | -0.280 | -1.409 | -0.272 | -1.742 | 0.968  | -1.168 | -1.416 | 14456 | GAS6     | NM_019521_8_-1  |
| Dnah10   | -4.981 | -4.981 | -3.155 | -2.263 | -4.950 | -4.854 | -4.981 | -4.981 | -4.981 | -4.981 | 56087 | DNAH10   | NM_019536_5_+1  |
| Psmg1    | 4.703  | 4.451  | 4.294  | 4.590  | 4.360  | 4.609  | 4.286  | 4.451  | 3.330  | 2.942  | 56088 | PSMG1    | NM_019537_16_-1 |
| Pfpl     | -4.981 | -4.981 | -0.926 | -2.240 | -4.257 | -4.945 | -4.772 | -4.975 | -4.981 | -4.981 | 56093 | NA       | NM_019540_19_+1 |
| Nagk     | 4.806  | 4.772  | 5.471  | 5.841  | 3.798  | 3.778  | 3.735  | 4.149  | 3.061  | 3.536  | 56174 | NAGK     | NM_019542_6_+1  |
| Pigp     | -0.701 | 1.426  | 0.693  | 0.206  | -0.679 | -0.793 | -2.106 | -2.315 | -4.821 | -4.890 | 56176 | PIGP     | NM_019543_16_-1 |
| Rbm38    | 3.451  | 3.086  | 1.542  | 1.940  | 4.160  | 3.382  | 3.240  | 2.107  | 3.564  | 2.936  | 56190 | RBM38    | NM_019547_2_+1  |
| Plek     | 7.679  | 7.924  | 8.639  | 8.588  | 8.713  | 8.734  | 9.076  | 8.906  | 8.903  | 9.034  | 56193 | PLEK     | NM_019549_11_-1 |
| Ptbp2    | 4.137  | 4.141  | 4.716  | 4.263  | 3.936  | 3.560  | 4.097  | 3.664  | 3.323  | 3.605  | 56195 | PTBP2    | NM_019550_3_-1  |
| Tdp2     | 4.734  | 4.193  | 4.600  | 4.016  | 4.366  | 3.965  | 4.654  | 3.989  | 3.768  | 3.342  | 56196 | TDP2     | NM_019551_13_+1 |
| Abcb10   | 2.517  | 3.083  | 2.981  | 3.838  | 3.246  | 4.225  | 3.235  | 4.496  | 4.289  | 4.533  | 56199 | ABCB10   | NM_019552_8_-1  |
| Ddx21    | 4.819  | 4.755  | 5.086  | 5.501  | 5.561  | 5.686  | 5.648  | 5.538  | 5.195  | 4.802  | 56200 | DDX21    | NM_019553_10_-1 |
| Ensa     | 5.061  | 4.710  | 5.776  | 5.585  | 5.194  | 4.934  | 5.043  | 4.602  | 4.775  | 4.147  | 56205 | ENSA     | NM_019561_3_+1  |
| Uchl5    | 5.609  | 5.519  | 5.105  | 5.145  | 5.036  | 4.744  | 4.945  | 4.560  | 3.968  | 3.520  | 56207 | UCHL5    | NM_019562_1_+1  |
| Cited4   | -0.395 | -0.338 | -0.560 | 1.034  | 1.104  | 3.195  | 2.311  | 3.361  | 2.758  | 2.874  | 56222 | CITED4   | NM_019563_4_+1  |
| Htra1    | -2.948 | -4.981 | -1.919 | -2.523 | -3.061 | -0.399 | -0.854 | 2.157  | -4.981 | -3.855 | 56213 | HTRA1    | NM_019564_7_+1  |
| Zfp386   | 5.480  | 5.529  | 5.395  | 5.097  | 4.443  | 4.510  | 4.610  | 4.366  | 4.785  | 5.164  | 56220 | ZNF519   | NM_019565_12_+1 |
| Rhog     | 8.331  | 8.475  | 8.039  | 8.350  | 8.950  | 9.067  | 8.708  | 8.829  | 8.846  | 8.852  | 56212 | RHOA     | NM_019566_7_-1  |
| Acin1    | -0.663 | 2.156  | 0.871  | 0.250  | 0.684  | 0.589  | 0.310  | -2.855 | -4.540 | -4.784 | 56215 | ACIN1    | NM_019567_14_-1 |
| Cxcl14   | -4.981 | -4.981 | -4.962 | -4.592 | -4.976 | -4.464 | -4.928 | -0.412 | -4.981 | -1.387 | 57266 | CXCL14   | NM_019568_13_-1 |
| Fscn3    | -4.981 | -4.981 | -2.811 | -5.001 | -4.759 | -4.980 | -4.958 | -4.779 | -2.343 | -3.853 | 56223 | FSCN3    | NM_019569_6_+1  |
| Rev1     | 3.037  | 3.606  | 3.649  | 3.602  | 4.312  | 4.515  | 3.961  | 3.781  | 3.814  | 3.601  | 56210 | REV1     | NM_019570_1_-1  |
| Tspan5   | 0.944  | 1.174  | -0.295 | 0.816  | 1.323  | 1.175  | 2.839  | 2.802  | 5.249  | 4.857  | 56224 | TSPAN5   | NM_019571_3_+1  |
| Hdac7    | -0.188 | -0.406 | -1.626 | -0.130 | -0.390 | -1.300 | 0.620  | 0.424  | 2.574  | 2.003  | 56233 | HDAC7    | NM_019572_15_-1 |
| Wwox     | 2.833  | 2.964  | 1.674  | 1.633  | 2.029  | 1.853  | 1.586  | 1.604  | 2.316  | 2.267  | 80707 | WWOX     | NM_019573_8_+1  |
| Patz1    | 3.444  | 2.766  | 1.870  | 1.996  | 3.388  | 3.015  | 3.411  | 2.484  | 3.509  | 2.616  | 56218 | PATZ1    | NM_019574_11_+1 |
| Scamp4   | 7.235  | 7.096  | 5.810  | 5.787  | 6.053  | 6.122  | 5.788  | 5.972  | 6.155  | 5.978  | 56214 | SCAMP4   | NM_019575_10_+1 |
| Thsd1    | -1.090 | 0.310  | -1.160 | -2.666 | -2.838 | -3.979 | -2.263 | -2.702 | 0.902  | 0.466  | 56229 | THSD1    | NM_019576_8_+1  |
| Ccl24    | 0.692  | 0.400  | -0.472 | 3.544  | 0.929  | 0.832  | 0.374  | 3.686  | 0.407  | 2.459  | 56221 | CCL24    | NM_019577_5_-1  |
| Extl1    | -2.268 | -4.981 | 2.500  | 0.360  | 1.677  | -1.049 | 1.808  | -2.816 | -4.981 | -4.981 | 56219 | EXTL1    | NM_019578_4_-1  |
| Mpp5     | 3.178  | 3.482  | 3.842  | 4.352  | 3.212  | 3.645  | 3.005  | 3.527  | 2.195  | 3.702  | 56217 | MPP5     | NM_019579_12_+1 |
| Gde1     | 6.076  | 6.063  | 4.899  | 5.199  | 4.740  | 5.147  | 4.975  | 5.434  | 5.498  | 5.424  | 56209 | GDE1     | NM_019580_7_-1  |
| Gtpbp2   | 3.991  | 3.037  | 3.511  | 3.273  | 3.266  | 3.661  | 3.552  | 3.242  | 3.786  | 3.660  | 56055 | GTPBP2   | NM_019581_17_+1 |

|          |        |        |        |        |        |        |        |        |        |        |        |          |                 |
|----------|--------|--------|--------|--------|--------|--------|--------|--------|--------|--------|--------|----------|-----------------|
| Cacna1f  | -4.981 | -4.981 | -0.903 | 0.236  | -2.685 | -2.945 | 0.009  | 1.863  | 1.696  | 2.448  | 54652  | CACNA1F  | NM_019582_X_+1  |
| Il17rb   | 4.522  | 5.208  | -4.722 | -2.808 | -4.414 | -2.866 | -2.119 | -2.033 | -4.190 | -2.795 | 50905  | IL17RB   | NM_019583_14_-1 |
| Becn1    | 6.935  | 7.128  | 7.119  | 7.305  | 7.274  | 7.336  | 7.169  | 7.170  | 7.279  | 7.216  | 56208  | BECN1    | NM_019584_11_-1 |
| Espn     | -2.171 | -4.981 | -4.967 | -3.828 | -4.340 | -4.714 | -2.727 | -4.725 | -3.194 | -2.530 | 56226  | ESPN     | NM_019585_4_-1  |
| Ube2j1   | 5.676  | 5.794  | 6.619  | 6.581  | 6.359  | 6.403  | 6.409  | 6.503  | 6.606  | 6.722  | 56228  | UBE2J1   | NM_019586_4_+1  |
| Plxnb3   | -1.901 | -2.583 | -3.222 | -2.815 | -3.333 | -4.403 | 0.359  | 0.394  | 2.385  | 1.108  | 140571 | PLXNB3   | NM_019587_X_+1  |
| Plce1    | -4.981 | -4.981 | 4.375  | 4.133  | -1.022 | 1.273  | -2.891 | 0.403  | -4.981 | -4.981 | 74055  | PLCE1    | NM_019588_19_+1 |
| Napb     | -2.362 | -0.390 | -0.606 | 0.366  | -3.549 | -0.559 | -2.924 | -0.457 | -0.258 | 1.447  | 17957  | NAPB     | NM_019632_2_-1  |
| Tspan7   | -0.722 | -2.583 | -4.118 | -2.548 | -3.249 | -3.483 | -3.500 | -2.490 | -3.925 | -4.342 | 21912  | TSPAN7   | NM_019634_X_+1  |
| Stk3     | 4.746  | 4.525  | 4.684  | 4.954  | 4.805  | 4.446  | 4.708  | 4.863  | 4.582  | 5.226  | 56274  | STK3     | NM_019635_15_-1 |
| Tbc1d1   | 4.553  | 4.771  | 5.730  | 5.700  | 5.940  | 5.697  | 5.760  | 5.309  | 5.574  | 5.227  | 57915  | TBC1D1   | NM_019636_5_+1  |
| Styx     | 3.147  | 3.189  | 3.716  | 3.614  | 3.252  | 2.977  | 3.243  | 2.763  | 2.426  | 2.821  | 56291  | STYX     | NM_019637_14_+1 |
| Ubc      | 11.676 | 12.315 | 11.117 | 11.366 | 11.542 | 11.871 | 11.294 | 11.384 | 11.760 | 11.704 | 22190  | UBC      | NM_019639_5_-1  |
| Pitpnb   | 4.640  | 4.594  | 4.789  | 4.998  | 4.662  | 4.552  | 4.435  | 4.628  | 4.274  | 4.489  | 56305  | PITPNB   | NM_019640_5_+1  |
| Stmn1    | 4.326  | 2.902  | 7.300  | 6.284  | 8.115  | 6.512  | 7.137  | 5.511  | 4.366  | 2.469  | 16765  | STMN1    | NM_019641_4_+1  |
| Rpn2     | 8.103  | 7.955  | 7.743  | 7.905  | 7.281  | 7.229  | 7.551  | 7.844  | 7.989  | 7.891  | 20014  | RPN2     | NM_019642_2_+1  |
| Fam60a   | 4.023  | 3.419  | 6.436  | 6.409  | 6.363  | 6.135  | 5.556  | 5.178  | 4.374  | 4.164  | 56306  | FAM60A   | NM_019643_6_-1  |
| Rpl21    | 9.435  | 7.682  | 9.679  | 8.391  | 9.564  | 8.286  | 9.845  | 8.325  | 8.133  | 6.639  | 19933  | RPL21    | NM_019647_5_+1  |
| Metap2   | 7.116  | 7.188  | 6.851  | 7.202  | 6.771  | 7.105  | 7.004  | 7.347  | 6.635  | 7.014  | 56307  | METAP2   | NM_019648_10_-1 |
| Clptm1   | 6.378  | 6.031  | 6.512  | 6.447  | 7.953  | 7.950  | 7.568  | 7.036  | 7.568  | 7.136  | 56457  | CLPTM1   | NM_019649_7_-1  |
| Gosr2    | 6.660  | 6.724  | 7.703  | 7.677  | 7.768  | 7.435  | 7.567  | 7.586  | 7.648  | 7.795  | 56494  | GOSR2    | NM_019650_11_-1 |
| Ptpn9    | 2.684  | 2.093  | 3.939  | 3.777  | 3.680  | 3.666  | 4.049  | 3.790  | 4.043  | 4.097  | 56294  | PTPN9    | NM_019651_9_+1  |
| Asna1    | 4.848  | 4.874  | 4.744  | 4.901  | 4.463  | 4.428  | 4.604  | 4.638  | 4.895  | 4.809  | 56495  | ASNA1    | NM_019652_8_-1  |
| Wsb1     | 5.942  | 6.176  | 6.940  | 7.095  | 6.424  | 6.503  | 7.311  | 7.510  | 8.340  | 8.502  | 78889  | WSB1     | NM_019653_11_-1 |
| Socs5    | 3.377  | 3.486  | 4.286  | 4.212  | 3.131  | 3.349  | 3.824  | 3.516  | 3.151  | 3.562  | 56468  | SOC5     | NM_019654_17_+1 |
| Adar     | 4.775  | 4.602  | 5.434  | 5.543  | 5.149  | 5.177  | 5.069  | 4.893  | 6.053  | 6.086  | 56417  | ADAR     | NM_019655_3_+1  |
| Tspan6   | 0.868  | 1.721  | -4.023 | -1.353 | -2.148 | -1.129 | -4.952 | -0.777 | -4.981 | -3.480 | 56496  | TSPAN6   | NM_019656_X_-1  |
| Hsd17b12 | 6.929  | 6.995  | 6.709  | 6.693  | 6.342  | 6.395  | 6.546  | 6.585  | 5.916  | 6.300  | 56348  | HSD17B12 | NM_019657_2_-1  |
| Shoc2    | 3.708  | 4.187  | 5.036  | 5.255  | 4.684  | 4.561  | 4.615  | 4.797  | 5.019  | 5.118  | 56392  | SHOC2    | NM_019658_19_+1 |
| Mycbp    | 4.665  | 4.807  | 4.746  | 4.827  | 4.419  | 4.352  | 4.716  | 4.419  | 4.125  | 4.059  | 56309  | MYCBP    | NM_019660_4_+1  |
| Ykt6     | 4.651  | 4.462  | 5.474  | 5.386  | 5.345  | 5.218  | 5.210  | 5.160  | 5.807  | 5.784  | 56418  | YKT6     | NM_019661_11_+1 |
| Rrad     | 5.810  | 5.635  | 6.002  | 6.306  | 7.696  | 7.442  | 6.530  | 6.003  | 3.754  | 4.140  | 56437  | RRAD     | NM_019662_8_-1  |
| Pias1    | 6.274  | 6.477  | 6.700  | 6.672  | 7.146  | 7.062  | 6.794  | 6.865  | 6.873  | 6.892  | 56469  | PIAS1    | NM_019663_9_-1  |
| Arl6     | 4.470  | 4.702  | 5.268  | 4.905  | 3.267  | 3.645  | 2.569  | 3.224  | 0.614  | 1.375  | 56297  | ARL6     | NM_019665_16_-1 |
| Syncrip  | 4.937  | 4.553  | 5.310  | 5.314  | 5.268  | 5.081  | 4.829  | 4.766  | 3.943  | 3.640  | 56403  | SYNCRIP  | NM_019666_9_-1  |
| Stam2    | 4.721  | 4.930  | 5.064  | 5.155  | 5.049  | 5.302  | 5.179  | 5.052  | 5.771  | 5.884  | 56324  | STAM2    | NM_019667_2_-1  |
| Ube2a    | 7.504  | 7.358  | 6.550  | 6.659  | 5.713  | 5.779  | 6.667  | 6.682  | 6.558  | 6.729  | 22209  | UBE2A    | NM_019668_X_+1  |
| Diaph3   | -0.327 | -1.459 | 1.843  | 1.551  | 2.307  | 2.159  | 1.689  | 1.336  | -0.446 | -0.301 | 56419  | DIAPH3   | NM_019670_14_-1 |
| Net1     | -0.439 | 1.631  | 1.254  | 0.587  | 1.265  | 2.009  | 1.724  | 0.971  | 1.405  | -0.142 | 56349  | NET1     | NM_019671_13_-1 |
| Actl6a   | 6.236  | 6.310  | 6.139  | 6.314  | 6.030  | 6.076  | 5.832  | 6.138  | 5.606  | 5.664  | 56456  | ACTL6A   | NM_019673_3_+1  |
| Ppp4c    | 7.570  | 7.553  | 7.868  | 7.965  | 7.910  | 7.831  | 7.689  | 7.817  | 7.867  | 7.839  | 56420  | PPP4C    | NM_019674_7_-1  |
| Plcd1    | -4.981 | -4.981 | -3.154 | -2.602 | -3.774 | -3.266 | -2.799 | -3.084 | 0.392  | -0.145 | 18799  | PLCD1    | NM_019676_9_-1  |
| Plcb1    | -3.963 | -4.981 | -4.942 | -4.551 | -4.969 | -4.864 | -3.771 | -0.488 | 4.534  | 4.326  | 18795  | PLCB1    | NM_019677_2_+1  |
| Tfg      | 6.630  | 6.770  | 6.911  | 7.131  | 5.961  | 5.954  | 6.154  | 6.475  | 6.038  | 6.480  | 21787  | TFG      | NM_019678_16_-1 |
| Fmn1     | -4.981 | -2.433 | -1.824 | 0.243  | -0.245 | -0.672 | 0.112  | -1.497 | 2.646  | 2.111  | 57778  | NA       | NM_019679_11_+1 |
| Elf4     | 4.925  | 5.143  | 6.240  | 6.015  | 6.572  | 6.305  | 6.599  | 6.438  | 7.299  | 7.211  | 56501  | ELF4     | NM_019680_X_-1  |
| Ncs1     | -1.627 | -4.981 | -1.383 | -3.082 | -0.749 | -2.954 | -3.043 | -3.063 | -4.981 | -4.981 | 14299  | NCS1     | NM_019681_2_+1  |
| Dynll1   | 8.572  | 8.954  | 7.784  | 7.881  | 8.185  | 8.425  | 8.463  | 8.500  | 7.027  | 7.588  | 56455  | DYNLL1   | NM_019682_5_-1  |
| Ankrd49  | 5.010  | 4.855  | 4.253  | 4.129  | 4.323  | 4.432  | 4.267  | 4.378  | 3.948  | 3.980  | 56503  | ANKRD49  | NM_019683_9_-1  |
| Srpk3    | 4.340  | 5.645  | -1.826 | 1.246  | -0.810 | 1.869  | 0.746  | 3.464  | -0.749 | -0.952 | 56504  | SRPK3    | NM_019684_X_+1  |
| Ruvbl1   | 5.866  | 6.082  | 6.272  | 6.310  | 5.293  | 5.469  | 5.435  | 5.586  | 4.798  | 4.638  | 56505  | RUVBL1   | NM_019685_6_+1  |
| Cib2     | 5.850  | 5.886  | 0.937  | 1.682  | 2.591  | 3.174  | 3.165  | 3.372  | 3.774  | 3.749  | 56506  | CIB2     | NM_019686_9_-1  |
| Slc22a4  | -4.981 | -1.318 | -1.509 | 0.349  | -0.923 | 0.936  | 1.580  | 1.865  | 4.062  | 3.941  | 30805  | SLC22A4  | NM_019687_11_-1 |
| Rapgef4  | -4.981 | -4.981 | -4.878 | -4.092 | -4.001 | -3.706 | -3.839 | -4.613 | -4.263 | -4.463 | 56508  | RAPGEF4  | NM_019688_2_+1  |
| Arid3b   | 4.332  | 4.496  | 5.333  | 5.007  | 3.398  | 3.410  | 3.127  | 3.877  | 3.623  | 3.419  | 56380  | ARID3B   | NM_019689_9_-1  |
| Gnas     | -2.592 | -3.153 | -4.561 | -4.970 | -4.280 | -4.518 | -3.965 | -4.961 | -4.242 | -4.981 | 14683  | GNAS     | NM_019690_2_+1  |
| Ddx39b   | 5.447  | 5.936  | 5.659  | 5.706  | 6.088  | 5.940  | 5.698  | 5.867  | 5.314  | 4.770  | 53817  | DDX39B   | NM_019693_17_+1 |
| Letm1    | 5.582  | 5.623  | 5.445  | 5.553  | 5.814  | 5.723  | 5.634  | 5.648  | 5.872  | 5.844  | 56384  | LETM1    | NM_019694_5_-1  |
| Pard6a   | 2.062  | -0.679 | -1.708 | -4.535 | -1.438 | -2.071 | -1.874 | -4.628 | -4.676 | -4.967 | 56513  | PARD6A   | NM_019695_8_+1  |
| Cpxm1    | -4.981 | -4.981 | -2.783 | -3.392 | -3.024 | -4.463 | -2.255 | -2.232 | -0.249 | -1.036 | 56264  | CPXM1    | NM_019696_2_-1  |
| Aldh18a1 | 3.007  | 2.996  | 3.984  | 4.036  | 3.825  | 3.407  | 3.864  | 4.284  | 3.859  | 3.328  | 56454  | ALDH18A1 | NM_019698_19_-1 |
| Fads2    | 5.507  | 5.364  | 0.564  | 0.250  | -2.667 | -1.264 | -0.723 | 0.928  | -2.305 | -0.989 | 56473  | FADS2    | NM_019699_19_-1 |
| Pus1     | 1.563  | 1.815  | 2.190  | 1.963  | 2.316  | 1.752  | 2.545  | 1.680  | 2.355  | 2.457  | 56361  | PUS1     | NM_019700_5_-1  |
| Hbs1l    | 4.715  | 5.146  | 5.254  | 5.239  | 4.398  | 4.417  | 4.203  | 4.828  | 5.242  | 5.080  | 56422  | HBS1L    | NM_019702_10_+1 |
| Pfkip    | 5.727  | 5.006  | 7.151  | 6.201  | 4.644  | 3.717  | 5.738  | 5.702  | 6.930  | 6.289  | 56421  | PFKP     | NM_019703_13_-1 |
| Tmem115  | 5.098  | 5.140  | 4.716  | 4.690  | 4.304  | 4.576  | 4.598  | 4.838  | 5.427  | 5.500  | 56395  | NA       | NM_019704_9_+1  |
| Rbck1    | 4.445  | 3.786  | 2.249  | 3.608  | 2.954  | 2.485  | 3.366  | 2.311  | 2.619  | 2.804  | 24105  | RBCK1    | NM_019705_2_-1  |
| Rnf138   | 4.910  | 4.824  | 4.104  | 4.016  | 3.589  | 3.257  | 3.763  | 3.780  | 3.560  | 3.697  | 56515  | RNF138   | NM_019706_18_+1 |
| Scoc     | 4.388  | 4.679  | 4.068  | 4.316  | 3.970  | 4.076  | 3.732  | 3.956  | 3.095  | 3.411  | 56367  | SCOC     | NM_019708_8_-1  |
| Mbtps1   | 3.397  | 3.614  | 2.959  | 3.500  | 3.801  | 3.434  | 3.255  | 3.372  | 3.133  | 3.299  | 56453  | MBTPS1   | NM_019709_8_-1  |
| Smc1a    | 6.209  | 6.394  | 6.514  | 6.490  | 7.029  | 6.911  | 6.867  | 6.862  | 6.526  | 6.568  | 24061  | SMC1A    | NM_019710_X_+1  |
| Rbms2    | 3.437  | 3.856  | 2.846  | 3.110  | 3.357  | 3.937  | 3.454  | 3.920  | 3.639  | 3.757  | 56516  | RBMS2    | NM_019711_10_-1 |
| Rbx1     | 8.766  | 8.758  | 8.336  | 8.197  | 8.303  | 8.224  | 8.508  | 8.150  | 7.498  | 7.253  | 56438  | NA       | NM_019712_15_+1 |
| Rassf1   | 5.211  | 5.254  | 6.141  | 6.003  | 5.394  | 5.249  | 5.975  | 5.960  | 6.461  | 6.390  | 56289  | RASSF1   | NM_019713_9_+1  |

|               |        |        |        |        |        |        |        |        |        |        |       |          |                 |
|---------------|--------|--------|--------|--------|--------|--------|--------|--------|--------|--------|-------|----------|-----------------|
| Kcmf1         | 6.265  | 6.098  | 6.197  | 6.219  | 5.880  | 5.826  | 5.810  | 5.800  | 5.999  | 5.854  | 74287 | KCMF1    | NM_019715_6_-1  |
| Orc6          | 4.364  | 4.375  | 4.448  | 4.390  | 4.902  | 4.508  | 4.425  | 3.997  | 3.406  | 2.694  | 56452 | ORC6     | NM_019716_8_+1  |
| Atl2          | 4.967  | 5.475  | 4.179  | 4.245  | 4.020  | 3.989  | 4.674  | 4.666  | 4.940  | 4.915  | 56298 | ATL2     | NM_019717_17_-1 |
| Arl3          | 4.834  | 4.386  | 4.881  | 4.492  | 4.174  | 3.959  | 3.706  | 3.564  | 2.670  | 2.485  | 56350 | ARL3     | NM_019718_19_-1 |
| Stub1         | 7.287  | 7.575  | 6.796  | 7.008  | 6.990  | 7.074  | 6.741  | 6.947  | 6.161  | 6.101  | 56424 | STUB1    | NM_019719_17_-1 |
| Cyb561d2      | 5.958  | 5.839  | 5.037  | 5.115  | 4.765  | 4.803  | 4.643  | 4.661  | 4.249  | 3.872  | 56368 | CYB561D2 | NM_019720_9_-1  |
| Mettl3        | 4.205  | 4.354  | 4.382  | 4.273  | 4.937  | 4.625  | 4.443  | 4.429  | 3.894  | 4.177  | 56335 | METTL3   | NM_019721_14_-1 |
| Arl2          | 5.423  | 5.344  | 4.640  | 4.962  | 4.191  | 4.825  | 4.479  | 4.574  | 3.353  | 3.275  | 56327 | ARL2     | NM_019722_19_-1 |
| Slc22a21      | -2.178 | -2.601 | 4.125  | 4.442  | 0.931  | 0.995  | 1.636  | 2.187  | 1.452  | 2.020  | 56517 | NA       | NM_019723_11_-1 |
| Tle2          | -1.550 | -1.793 | -4.933 | -4.459 | -3.289 | -1.452 | -2.510 | -2.523 | -2.131 | -1.988 | 21886 | TLE2     | NM_019725_10_+1 |
| Gps2          | 6.653  | 6.615  | 6.217  | 6.285  | 6.618  | 6.556  | 6.524  | 6.417  | 6.153  | 5.792  | 56310 | GPS2     | NM_019726_11_+1 |
| Snx1          | 6.572  | 6.547  | 7.340  | 7.352  | 6.967  | 6.554  | 7.178  | 7.155  | 7.929  | 7.924  | 56440 | SNX1     | NM_019727_9_-1  |
| Usp8          | 5.228  | 5.326  | 6.589  | 6.583  | 6.022  | 6.133  | 6.287  | 6.510  | 7.349  | 7.410  | 84092 | USP8     | NM_019729_2_+1  |
| Nme3          | 6.549  | 6.846  | 3.570  | 3.919  | 3.993  | 4.322  | 4.474  | 4.736  | 3.966  | 3.827  | 79059 | NME3     | NM_019730_17_+1 |
| Nme4          | 3.596  | 1.651  | 4.195  | 3.126  | 3.764  | 3.076  | 3.426  | 3.056  | -0.176 | -0.404 | 56520 | NME4     | NM_019731_17_-1 |
| Runx3         | 5.150  | 5.196  | 4.871  | 4.906  | 6.878  | 6.735  | 6.386  | 5.709  | 5.019  | 5.112  | 12399 | RUNX3    | NM_019732_4_+1  |
| Rbpms         | 2.191  | 0.008  | 0.635  | 0.636  | 1.010  | -0.081 | 3.304  | 2.841  | 3.466  | 3.551  | 19663 | RBPMS    | NM_019733_8_-1  |
| Asah1         | 9.294  | 8.615  | 9.068  | 8.080  | 8.133  | 7.213  | 8.390  | 7.968  | 9.194  | 8.876  | 11886 | ASAH1    | NM_019734_8_-1  |
| Apip          | 6.035  | 5.913  | 5.597  | 5.570  | 5.363  | 5.483  | 5.510  | 5.270  | 3.823  | 4.106  | 56369 | APIP     | NM_019735_2_+1  |
| Acot9         | 6.080  | 6.279  | 5.665  | 5.620  | 5.311  | 5.362  | 6.220  | 6.326  | 6.581  | 6.665  | 56360 | ACOT9    | NM_019736_X_+1  |
| B4galt6       | 1.149  | 0.241  | 2.953  | 2.337  | 5.575  | 5.571  | 4.889  | 3.567  | 3.244  | 3.286  | 56386 | B4GALT6  | NM_019737_18_-1 |
| Nupr1         | -0.796 | -2.153 | -0.864 | -0.196 | 1.105  | 1.788  | 6.276  | 6.152  | 6.603  | 6.648  | 56312 | NUPR1    | NM_019738_7_-1  |
| Foxo1         | 5.286  | 5.358  | 6.254  | 6.169  | 5.307  | 5.536  | 5.673  | 5.968  | 5.089  | 5.322  | 56458 | FOXO1    | NM_019739_3_+1  |
| Foxo3         | 0.205  | 1.246  | 0.083  | 0.307  | 0.953  | 0.836  | 0.935  | 0.746  | 1.916  | 1.575  | 56484 | FOXO3    | NM_019740_10_-1 |
| Slc2a5        | -0.161 | -3.267 | -3.347 | -4.210 | -2.822 | -4.207 | -4.861 | -4.965 | -3.531 | -4.981 | 56485 | SLC2A5   | NM_019741_4_+1  |
| Tusc2         | 5.771  | 5.750  | 4.607  | 4.828  | 5.141  | 5.372  | 4.997  | 5.093  | 4.790  | 4.811  | 80385 | TUSC2    | NM_019742_9_+1  |
| Rybp          | 4.217  | 4.603  | 4.175  | 4.096  | 4.237  | 4.388  | 4.202  | 4.280  | 4.238  | 4.649  | 56353 | RYBP     | NM_019743_6_-1  |
| Ncoa4         | 6.979  | 6.876  | 6.172  | 6.421  | 6.646  | 6.847  | 6.227  | 6.187  | 6.023  | 6.068  | 27057 | NCOA4    | NM_019744_14_+1 |
| Pdcd10        | 7.642  | 7.537  | 6.888  | 6.645  | 6.831  | 6.848  | 6.869  | 6.722  | 6.442  | 6.643  | 56426 | PDCD10   | NM_019745_3_-1  |
| Pdcd5         | 6.578  | 6.481  | 5.718  | 5.918  | 5.932  | 6.021  | 6.281  | 6.056  | 4.935  | 4.968  | 56330 | PDCD5    | NM_019746_7_-1  |
| Zfp113        | 2.719  | 2.689  | 2.807  | 2.191  | 3.179  | 2.952  | 2.759  | 2.683  | 2.451  | 2.016  | 56314 | ZNFX     | NM_019747_5_-1  |
| Sae1          | 6.345  | 6.365  | 6.091  | 6.255  | 6.399  | 6.258  | 6.058  | 6.063  | 5.286  | 5.191  | 56459 | SAE1     | NM_019748_7_-1  |
| Gabarap       | 8.859  | 8.705  | 9.186  | 9.114  | 8.546  | 8.561  | 8.504  | 8.606  | 8.519  | 8.501  | 56486 | GABARAP  | NM_019749_11_+1 |
| Nat6          | 4.481  | 4.400  | 3.099  | 3.174  | 3.693  | 3.396  | 3.699  | 3.495  | 3.951  | 3.808  | 56441 | NAT6     | NM_019750_9_+1  |
| Htra2         | 5.066  | 4.738  | 6.162  | 6.622  | 6.706  | 6.886  | 6.774  | 6.755  | 6.010  | 6.150  | 64704 | HTRA2    | NM_019752_6_-1  |
| Cdh17         | -4.981 | -4.981 | 0.685  | 2.005  | 3.618  | 5.885  | 0.533  | 2.163  | -4.981 | -2.969 | 12557 | CDH17    | NM_019753_4_+1  |
| Tagln3        | -3.843 | -4.981 | -3.840 | -4.972 | -4.985 | -4.985 | -2.771 | -3.475 | -3.043 | -4.981 | 56370 | TAGLN3   | NM_019754_16_-1 |
| Plp2          | 7.410  | 7.583  | 6.768  | 6.396  | 6.332  | 6.332  | 5.764  | 5.954  | 5.792  | 5.242  | 18824 | PLP2     | NM_019755_X_-1  |
| Tubd1         | 3.333  | 4.073  | 2.311  | 2.816  | 3.414  | 3.349  | 2.472  | 2.823  | 2.491  | 2.339  | 56427 | TUBD1    | NM_019756_11_+1 |
| Fzr1          | 5.813  | 5.849  | 5.554  | 5.721  | 5.946  | 5.851  | 5.971  | 5.798  | 5.808  | 5.740  | 56371 | FZR1     | NM_019757_10_-1 |
| Mtch2         | 7.035  | 7.136  | 7.244  | 7.402  | 6.660  | 6.740  | 6.686  | 6.777  | 6.431  | 6.298  | 56428 | MTCH2    | NM_019758_2_+1  |
| Dpt           | -1.180 | 0.844  | -4.975 | -3.775 | -3.979 | -2.049 | -4.509 | -4.521 | -4.981 | -4.981 | 56429 | DPT      | NM_019759_1_+1  |
| Serinc1       | 7.115  | 7.319  | 6.914  | 6.871  | 6.311  | 6.532  | 6.864  | 7.003  | 7.527  | 7.913  | 56442 | SERINC1  | NM_019760_10_-1 |
| Nxt1          | 5.782  | 5.802  | 5.253  | 5.427  | 5.459  | 5.304  | 5.451  | 5.353  | 4.337  | 4.351  | 56488 | NXT1     | NM_019761_2_+1  |
| Pkp3          | 7.383  | 7.216  | 5.929  | 5.360  | 6.214  | 5.543  | 5.525  | 4.623  | 3.937  | 2.879  | 56460 | PKP3     | NM_019762_7_+1  |
| Spen          | 4.454  | 4.176  | 4.913  | 4.777  | 5.235  | 5.041  | 4.998  | 4.794  | 5.384  | 4.969  | 56381 | SPEN     | NM_019763_4_-1  |
| Amotl2        | -4.981 | -4.981 | -3.693 | -1.660 | -4.883 | -3.100 | -4.323 | -0.985 | 2.185  | 2.945  | 56332 | AMOTL2   | NM_019764_9_+1  |
| Clip1         | 3.527  | 3.679  | 5.299  | 5.008  | 5.667  | 5.549  | 5.897  | 5.448  | 6.369  | 5.911  | 56430 | CLIP1    | NM_019765_5_-1  |
| Ptges3        | 6.662  | 6.851  | 6.732  | 6.772  | 6.856  | 6.840  | 6.795  | 6.636  | 5.739  | 6.114  | 56351 | PTGES3   | NM_019766_10_+1 |
| Arpc1a        | 6.770  | 6.516  | 6.352  | 6.321  | 6.481  | 6.361  | 6.080  | 5.856  | 6.418  | 6.242  | 56443 | ARPC1A   | NM_019767_5_+1  |
| Morf4l2       | -1.063 | -0.913 | -2.162 | -4.696 | -2.425 | -4.771 | -2.091 | -2.533 | 0.846  | -0.211 | 56397 | MORF4L2  | NM_019768_X_-1  |
| Chp1          | 5.698  | 6.526  | 5.998  | 7.231  | 5.773  | 6.765  | 5.954  | 7.183  | 7.014  | 8.020  | 56398 | CHP1     | NM_019769_2_+1  |
| Tmed2         | 9.693  | 9.601  | 8.728  | 8.817  | 8.381  | 8.286  | 8.515  | 8.869  | 9.265  | 9.362  | 56334 | TMED2    | NM_019770_5_+1  |
| Dstn          | 5.642  | 5.534  | 7.198  | 6.862  | 6.886  | 6.892  | 7.162  | 7.105  | 7.934  | 8.002  | 56431 | DSTN     | NM_019771_2_+1  |
| 1110004F10Rik | 7.810  | 8.005  | 6.970  | 7.001  | 7.219  | 7.277  | 7.229  | 7.086  | 6.544  | 6.543  | 56372 | C11orf58 | NM_019772_7_+1  |
| Rab9          | 5.613  | 5.792  | 5.066  | 4.962  | 4.689  | 4.551  | 4.977  | 4.783  | 4.672  | 4.622  | 56382 | RAB9A    | NM_019773_X_-1  |
| Akap8         | 6.076  | 6.118  | 6.038  | 5.915  | 6.555  | 6.508  | 6.531  | 6.281  | 6.471  | 6.417  | 56399 | AKAP8    | NM_019774_17_-1 |
| Snd1          | 6.318  | 6.278  | 6.706  | 6.746  | 6.501  | 6.268  | 6.640  | 6.916  | 7.534  | 7.402  | 56463 | SND1     | NM_019776_6_+1  |
| Ikbke         | 2.760  | 2.673  | -2.021 | 1.309  | -2.988 | 1.081  | 1.368  | 3.525  | 5.867  | 6.014  | 56489 | IKBKE    | NM_019777_1_-1  |
| Zbtb20        | 1.507  | 2.536  | 1.233  | 1.100  | 0.158  | 0.454  | 1.211  | 1.803  | 1.915  | 2.153  | 56490 | ZBTB20   | NM_019778_16_+1 |
| Cyp11a1       | -4.981 | -4.981 | -4.886 | -3.588 | -4.736 | -2.056 | 2.666  | -1.968 | -4.981 | -4.981 | 13070 | CYP11A1  | NM_019779_9_+1  |
| Vps29         | 7.539  | 7.506  | 7.186  | 7.064  | 6.728  | 6.680  | 6.768  | 6.735  | 6.077  | 6.102  | 56433 | VPS29    | NM_019780_5_+1  |
| Pex14         | 4.476  | 4.692  | 3.780  | 3.805  | 3.899  | 3.831  | 4.009  | 3.786  | 4.327  | 3.813  | 56273 | PEX14    | NM_019781_4_-1  |
| P3h1          | -4.584 | -4.561 | -4.770 | -4.365 | -4.977 | -4.979 | -3.828 | -4.778 | -4.434 | -4.851 | 56401 | P3H1     | NM_019782_4_+1  |
| P3h1          | 1.586  | 2.170  | 1.339  | 2.414  | 1.813  | 1.731  | 0.768  | 1.905  | 2.239  | 2.818  | 56401 | P3H1     | NM_019783_4_+1  |
| Actr10        | 7.001  | 7.269  | 6.554  | 6.598  | 6.584  | 6.660  | 6.463  | 6.565  | 6.349  | 6.414  | 56444 | ACTR10   | NM_019785_12_+1 |
| Tbk1          | 5.412  | 6.018  | 5.990  | 6.504  | 5.821  | 6.724  | 5.880  | 6.256  | 6.082  | 6.691  | 56480 | TBK1     | NM_019786_10_-1 |
| Sec23b        | 5.452  | 4.926  | 4.769  | 4.797  | 4.422  | 3.877  | 4.282  | 4.275  | 4.645  | 4.705  | 27054 | SEC23B   | NM_019787_2_+1  |
| Bloc1s6       | 5.023  | 4.979  | 5.049  | 5.184  | 5.239  | 5.215  | 5.302  | 5.092  | 4.914  | 5.312  | 18457 | BLOC1S6  | NM_019788_2_+1  |
| Kcniip3       | 1.101  | -4.981 | 3.939  | 1.453  | 5.001  | 3.019  | 4.582  | 1.735  | -0.189 | -3.763 | 56461 | KCNIP3   | NM_019789_2_-1  |
| Maged1        | 5.900  | 6.334  | 1.578  | 2.776  | 2.320  | 2.724  | 0.567  | 2.518  | 0.694  | 1.188  | 94275 | MAGED1   | NM_019791_X_-1  |
| Tspan3        | 6.967  | 6.943  | 8.128  | 7.387  | 8.314  | 6.899  | 7.983  | 6.181  | 4.766  | 4.967  | 56434 | TSPAN3   | NM_019793_9_-1  |
| Dnaja2        | 7.135  | 7.207  | 7.111  | 7.243  | 7.430  | 7.403  | 7.313  | 7.282  | 7.082  | 7.246  | 56445 | DNAJA2   | NM_019794_8_-1  |
| Dnajc7        | 10.083 | 9.905  | 7.629  | 7.508  | 7.948  | 8.161  | 7.559  | 7.513  | 7.047  | 6.950  | 56354 | DNAJC7   | NM_019795_11_-1 |

|          |        |        |        |        |        |        |        |        |        |        |        |         |                 |
|----------|--------|--------|--------|--------|--------|--------|--------|--------|--------|--------|--------|---------|-----------------|
| Syncrip  | 5.516  | 5.597  | 5.446  | 5.507  | 5.784  | 5.706  | 5.838  | 5.352  | 4.772  | 5.280  | 56403  | SYNCRIP | NM_019796_9_-1  |
| Trip4    | 4.148  | 4.344  | 3.812  | 3.807  | 3.979  | 3.988  | 3.695  | 3.523  | 3.908  | 4.073  | 56404  | TRIP4   | NM_019797_9_-1  |
| Pde4a    | 4.706  | 4.893  | 0.662  | 0.019  | -0.828 | -0.029 | 0.122  | 0.022  | -3.748 | -4.747 | 18577  | PDE4A   | NM_019798_9_+1  |
| Rhcg     | -4.981 | -4.981 | -4.938 | -4.938 | -4.981 | -4.981 | -4.979 | -4.986 | -2.871 | -3.758 | 56315  | RHCG    | NM_019799_7_-1  |
| Acp6     | 4.972  | 4.697  | 4.800  | 4.791  | 4.418  | 4.582  | 4.439  | 4.543  | 4.164  | 4.144  | 66659  | ACP6    | NM_019800_3_+1  |
| Ggcx     | 2.349  | 2.123  | 2.750  | 1.631  | 1.593  | 0.806  | 2.355  | 0.421  | 3.128  | 1.387  | 56316  | GGCX    | NM_019802_6_+1  |
| Ube2g2   | 5.429  | 5.390  | 6.206  | 6.475  | 6.126  | 6.132  | 6.154  | 5.952  | 5.613  | 5.542  | 22213  | UBE2G2  | NM_019803_10_+1 |
| B4galt4  | 2.723  | 0.739  | 4.903  | 4.574  | 4.212  | 2.976  | 4.683  | 3.782  | 2.870  | 2.331  | 56375  | B4GALT4 | NM_019804_16_+1 |
| Anapc7   | 4.898  | 4.675  | 4.595  | 4.454  | 4.805  | 4.532  | 4.609  | 4.664  | 4.740  | 4.439  | 56317  | ANAPC7  | NM_019805_5_+1  |
| Vapb     | 3.306  | 3.420  | 4.259  | 4.137  | 3.780  | 3.922  | 4.376  | 4.448  | 5.265  | 5.385  | 56491  | VAPB    | NM_019806_2_+1  |
| Acpp     | -4.981 | -4.981 | -3.821 | -3.651 | -4.810 | -4.056 | -2.041 | -2.501 | 0.164  | -2.063 | 56318  | ACPP    | NM_019807_9_-1  |
| Pdlim5   | 2.335  | 3.213  | 6.054  | 6.123  | 4.796  | 4.546  | 5.451  | 5.457  | 6.584  | 6.456  | 56376  | PDLM5   | NM_019808_3_-1  |
| Pdlim5   | 0.383  | 1.126  | 3.099  | 3.631  | 2.648  | 2.597  | 2.298  | 2.327  | 2.645  | 3.067  | 56376  | PDLM5   | NM_019809_3_-1  |
| Acss2    | 3.375  | 3.335  | 3.634  | 3.617  | 2.824  | 2.282  | 3.853  | 4.409  | 4.765  | 4.784  | 60525  | ACSS2   | NM_019811_2_+1  |
| Sirt1    | 4.396  | 3.973  | 4.268  | 3.991  | 4.453  | 4.122  | 4.341  | 4.114  | 3.992  | 4.380  | 93759  | SIRT1   | NM_019812_10_-1 |
| Dbn1     | -4.063 | -4.981 | 6.068  | 5.472  | 1.535  | 1.719  | -0.423 | 1.685  | -1.918 | -3.173 | 56320  | DBN1    | NM_019813_13_-1 |
| Higd1a   | 6.263  | 6.030  | 6.205  | 5.964  | 6.154  | 5.918  | 6.405  | 6.041  | 5.506  | 5.240  | 56295  | HIGD1A  | NM_019814_9_-1  |
| Aatf     | 5.335  | 5.300  | 5.318  | 5.463  | 5.078  | 5.236  | 4.905  | 5.148  | 4.494  | 4.508  | 56321  | AATF    | NM_019816_11_-1 |
| Copz1    | 8.203  | 8.199  | 7.781  | 7.991  | 7.705  | 7.705  | 7.798  | 7.935  | 8.264  | 8.160  | 56447  | COPZ1   | NM_019817_15_+1 |
| Timm22   | 5.833  | 5.862  | 5.274  | 5.503  | 5.037  | 5.192  | 5.072  | 5.235  | 4.346  | 4.179  | 56322  | TIMM22  | NM_019818_11_+1 |
| Dusp14   | -4.981 | -2.137 | -1.462 | -1.262 | 0.314  | -0.985 | -1.570 | -0.810 | -4.981 | -4.981 | 56405  | DUSP14  | NM_019819_11_-1 |
| Cbln3    | -3.843 | -3.280 | -1.772 | -3.073 | -2.086 | -3.658 | -2.771 | -4.642 | -4.394 | -4.981 | 56410  | CBLN3   | NM_019820_14_-1 |
| Gltp     | 9.305  | 9.410  | 8.865  | 8.974  | 8.251  | 7.987  | 8.203  | 8.462  | 8.647  | 8.569  | 56356  | GLTP    | NM_019821_5_-1  |
| Adrm1    | 6.773  | 6.772  | 6.275  | 6.489  | 6.445  | 6.397  | 6.317  | 6.331  | 5.952  | 5.730  | 56436  | ADRM1   | NM_019822_2_+1  |
| Cyp2d22  | -4.981 | -3.513 | -3.046 | -2.782 | -3.799 | -3.188 | -2.174 | -1.683 | -2.650 | -0.284 | 56448  | NA      | NM_019823_15_-1 |
| Arpc3    | 9.309  | 8.794  | 9.453  | 9.117  | 9.037  | 8.878  | 8.850  | 8.728  | 8.588  | 8.242  | 56378  | ARPC3   | NM_019824_5_+1  |
| Ncoa6    | 3.129  | 3.231  | 3.730  | 3.558  | 3.710  | 3.422  | 3.880  | 3.641  | 4.981  | 4.840  | 56406  | NA      | NM_019825_2_-1  |
| Ivd      | 5.815  | 5.920  | 5.456  | 5.439  | 5.572  | 5.301  | 5.356  | 5.212  | 4.690  | 4.477  | 56357  | IVD     | NM_019826_2_+1  |
| Gsk3b    | 4.845  | 4.835  | 5.169  | 4.850  | 5.307  | 5.201  | 5.035  | 4.925  | 4.813  | 4.802  | 56637  | GSK3B   | NM_019827_16_+1 |
| Trpc4ap  | 1.549  | 3.269  | 3.431  | 3.146  | 2.661  | 1.532  | 1.912  | 2.778  | 4.058  | 3.470  | 56407  | TRPC4AP | NM_019828_2_-1  |
| Stx5a    | 4.553  | 4.521  | 4.803  | 5.000  | 4.332  | 4.514  | 4.627  | 4.724  | 5.483  | 5.188  | 56389  | STX5    | NM_019829_19_+1 |
| Prmt1    | 3.409  | 3.643  | 3.353  | 2.985  | 2.775  | 1.501  | 2.450  | 2.073  | 2.150  | 1.634  | 15469  | PRMT1   | NM_019830_7_-1  |
| Zmym3    | 3.326  | 3.361  | 3.181  | 2.564  | 4.062  | 3.650  | 3.084  | 3.021  | 3.120  | 3.063  | 56364  | ZMYM3   | NM_019831_X_-1  |
| Gkap1    | 1.764  | 2.014  | 2.662  | 2.935  | 1.844  | 2.148  | 0.989  | 0.965  | 0.050  | 0.900  | 56278  | GKAP1   | NM_019832_13_-1 |
| Fam69b   | 1.306  | 1.448  | -1.492 | -1.189 | -0.689 | -0.596 | -2.820 | -0.877 | -1.598 | -3.210 | 56279  | FAM69B  | NM_019833_2_+1  |
| Git2     | 4.768  | 4.714  | 5.096  | 4.900  | 5.420  | 5.414  | 5.183  | 5.183  | 6.216  | 6.123  | 26431  | GIT2    | NM_019834_5_-1  |
| B4galt5  | 4.825  | 4.515  | 4.186  | 3.918  | 5.048  | 4.810  | 5.382  | 5.088  | 6.287  | 6.293  | 56336  | B4GALT5 | NM_019835_2_-1  |
| Noa1     | 3.814  | 3.773  | 4.370  | 4.353  | 4.190  | 4.008  | 4.137  | 4.029  | 4.502  | 4.397  | 56412  | NOA1    | NM_019836_5_-1  |
| Nudt3    | 5.518  | 5.314  | 5.784  | 5.900  | 6.003  | 5.979  | 5.707  | 5.610  | 5.472  | 5.286  | 56409  | NUDT3   | NM_019837_17_-1 |
| Pde4b    | -4.981 | -4.981 | -4.981 | -4.976 | -3.985 | -4.080 | -4.980 | -4.981 | -4.981 | -4.968 | 18578  | PDE4B   | NM_019840_4_+1  |
| Ctsf     | 1.287  | 3.318  | 0.359  | 1.138  | 0.051  | 2.196  | 1.340  | 3.377  | 1.561  | 3.499  | 56464  | CTSF    | NM_019861_19_+1 |
| Atr      | 3.820  | 3.805  | 3.912  | 3.766  | 4.370  | 4.055  | 4.125  | 3.569  | 3.601  | 3.348  | 245000 | ATR     | NM_019864_9_+1  |
| Rpl36a   | 7.215  | 7.212  | 7.451  | 7.459  | 7.156  | 7.199  | 7.755  | 7.468  | 5.853  | 5.745  | 19982  | NA      | NM_019865_X_+1  |
| Spib     | 7.994  | 8.044  | 3.720  | 3.407  | 5.769  | 5.049  | 5.587  | 4.676  | 1.661  | 0.490  | 272382 | SPIB    | NM_019866_7_-1  |
| Hnrnph2  | 7.150  | 7.099  | 7.370  | 7.354  | 7.258  | 7.168  | 7.281  | 7.321  | 7.149  | 7.455  | 56258  | HNRNPH2 | NM_019868_X_+1  |
| Rbm14    | 4.248  | 4.493  | 5.289  | 5.483  | 5.150  | 5.219  | 4.959  | 5.190  | 4.824  | 5.221  | 56275  | RBM14   | NM_019869_19_-1 |
| Naa10    | 3.393  | 3.579  | 2.515  | 2.726  | 3.004  | 2.898  | 3.063  | 2.888  | 2.254  | 1.706  | 56292  | NAA10   | NM_019870_X_-1  |
| Slc35g3  | -4.981 | -4.981 | -4.974 | -4.222 | -3.650 | -3.215 | -4.980 | -4.464 | -4.981 | -4.981 | 56293  | SLC35G6 | NM_019871_11_-1 |
| Dmrtb1   | -4.981 | -4.981 | -4.460 | -0.955 | 3.017  | 4.364  | 0.797  | 1.477  | -2.206 | -0.326 | 56296  | DMRTB1  | NM_019872_4_-1  |
| Fkbpl    | 2.056  | 2.341  | 2.218  | 2.144  | 1.428  | 0.877  | 1.744  | 1.675  | 3.081  | 2.602  | 56299  | FKBP1   | NM_019873_17_+1 |
| Dnajb5   | 2.074  | 2.295  | 1.957  | 1.563  | 2.307  | 2.123  | 2.013  | 1.194  | 2.895  | 2.149  | 56323  | DNAJB5  | NM_019874_4_+1  |
| Abcb9    | -0.644 | -1.199 | -1.083 | -1.267 | -2.185 | -2.221 | -0.519 | -0.041 | 0.848  | 0.564  | 56325  | ABCB9   | NM_019875_5_-1  |
| Copz2    | 2.259  | 4.405  | 3.032  | 3.904  | 0.549  | 2.822  | 0.590  | 2.219  | -0.317 | 0.844  | 56358  | COPZ2   | NM_019877_11_+1 |
| Sucg1    | 7.808  | 7.453  | 7.656  | 7.554  | 7.237  | 7.399  | 6.785  | 6.894  | 6.310  | 6.279  | 56451  | SUCLG1  | NM_019879_6_+1  |
| Mtch1    | 6.638  | 6.314  | 6.657  | 6.425  | 6.126  | 5.851  | 6.291  | 6.325  | 7.127  | 6.694  | 56462  | MTCH1   | NM_019880_17_-1 |
| Uba52    | 9.378  | 9.165  | 9.865  | 9.774  | 9.744  | 9.568  | 9.868  | 9.630  | 8.862  | 8.571  | 22186  | NA      | NM_019883_8_-1  |
| Tdo2     | 2.294  | 2.841  | -4.517 | -4.853 | -1.534 | -1.729 | -2.335 | -2.286 | -3.461 | -3.758 | 56720  | TDO2    | NM_019911_3_-1  |
| Ube2d2a  | 6.709  | 6.933  | 7.006  | 6.913  | 6.985  | 6.902  | 7.087  | 6.999  | 7.010  | 7.200  | 56550  | UBE2D2  | NM_019912_18_+1 |
| Txn2     | 8.130  | 7.984  | 7.465  | 7.511  | 7.496  | 7.398  | 7.305  | 7.341  | 7.152  | 6.760  | 56551  | TXN2    | NM_019913_15_-1 |
| Mlt11    | 4.256  | 4.306  | 3.104  | 2.817  | 3.232  | 2.677  | 3.135  | 2.571  | 2.406  | 2.445  | 56772  | MLT11   | NM_019914_3_-1  |
| Art2b    | -2.842 | -4.981 | -2.976 | 0.538  | -2.683 | 0.477  | -3.218 | 1.956  | -4.178 | -0.374 | 11872  | NA      | NM_019915_7_-1  |
| Vmn2r26  | -4.981 | -4.981 | -4.948 | -4.948 | -4.979 | -4.979 | -1.609 | -1.058 | -3.925 | -4.981 | 56552  | NA      | NM_019917_6_+1  |
| Ltbp1    | -4.981 | -4.981 | -4.796 | -2.323 | -4.920 | -4.242 | -4.949 | -2.516 | -4.834 | -4.961 | 268977 | LTBP1   | NM_019919_17_+1 |
| Lamtora3 | 6.432  | 6.208  | 5.911  | 5.409  | 5.814  | 5.308  | 5.962  | 5.528  | 6.092  | 5.582  | 56692  | LAMTOR3 | NM_019920_3_+1  |
| Akap10   | 4.187  | 4.246  | 5.043  | 4.929  | 5.448  | 5.528  | 5.377  | 5.387  | 6.195  | 6.223  | 56697  | AKAP10  | NM_019921_11_-1 |
| Crtap    | 4.453  | 5.044  | 3.936  | 4.391  | 3.440  | 3.919  | 3.647  | 4.055  | 2.727  | 3.781  | 56693  | CRTAP   | NM_019922_9_-1  |
| Itp2     | 6.123  | 6.174  | 4.943  | 5.661  | 5.324  | 6.400  | 5.387  | 6.307  | 5.114  | 5.775  | 16439  | ITPR2   | NM_019923_6_-1  |
| Rps6ka4  | 5.058  | 5.128  | 5.011  | 5.035  | 6.016  | 6.004  | 5.863  | 5.443  | 6.450  | 6.219  | 56613  | RPS6KA4 | NM_019924_19_-1 |
| Gpr132   | 3.794  | 3.894  | 5.828  | 5.740  | 6.131  | 5.947  | 6.035  | 5.231  | 5.215  | 5.260  | 56696  | GPR132  | NM_019925_12_-1 |
| Mtm1     | 1.590  | 1.256  | 2.372  | 1.533  | 1.308  | 0.709  | 0.431  | 1.994  | 2.720  | 2.234  | 17772  | MTM1    | NM_019926_X_+1  |
| Arih1    | 5.083  | 5.266  | 5.827  | 5.570  | 5.254  | 5.220  | 5.361  | 5.586  | 5.941  | 6.115  | 23806  | ARIH1   | NM_019927_9_-1  |
| Klk4     | -4.981 | -4.981 | -4.981 | -4.981 | -2.750 | -2.095 | -3.751 | -4.951 | -4.981 | -4.981 | 56640  | KLK4    | NM_019928_7_+1  |
| Sumo3    | 7.886  | 7.747  | 7.803  | 7.881  | 7.438  | 7.340  | 7.264  | 7.252  | 6.736  | 6.318  | 20610  | SUMO3   | NM_019929_10_+1 |
| Ranbp9   | 5.309  | 5.380  | 5.658  | 5.713  | 5.476  | 5.393  | 5.640  | 5.919  | 7.035  | 7.141  | 56705  | RANBP9  | NM_019930_13_-1 |

|          |        |        |        |        |        |        |        |        |        |        |       |          |                 |
|----------|--------|--------|--------|--------|--------|--------|--------|--------|--------|--------|-------|----------|-----------------|
| Pf4      | 2.772  | 1.238  | 0.996  | 3.724  | 1.399  | 0.819  | 2.531  | 3.305  | 1.879  | 1.771  | 56744 | PF4      | NM_019932_5_+1  |
| Ptpn4    | 3.122  | 3.414  | 2.567  | 3.078  | 2.621  | 3.434  | 2.169  | 2.426  | 1.081  | 1.993  | 19258 | PTPN4    | NM_019933_1_-1  |
| Ovol1    | 0.085  | 0.358  | -1.855 | -1.268 | 0.975  | 0.779  | 0.177  | -1.528 | -0.033 | -0.412 | 18426 | OVOL1    | NM_019935_19_-1 |
| Cript    | 7.574  | 7.547  | 7.047  | 6.942  | 6.723  | 6.833  | 6.929  | 6.726  | 6.528  | 6.576  | 56724 | CRIPT    | NM_019936_17_+1 |
| Ccnl1    | 7.744  | 7.741  | 7.624  | 7.360  | 7.566  | 7.633  | 7.504  | 7.625  | 7.343  | 7.448  | 56706 | CCNL1    | NM_019937_3_-1  |
| Mpp6     | 5.810  | 5.651  | 7.174  | 7.162  | 5.868  | 5.945  | 6.337  | 6.461  | 5.549  | 5.955  | 56524 | MPP6     | NM_019939_6_+1  |
| Zfp111   | 0.904  | -0.623 | 2.596  | 1.219  | 1.880  | 0.984  | 2.071  | 0.320  | 2.073  | 0.977  | 56707 | ZNF226   | NM_019940_7_-1  |
| Zfp235   | 1.663  | 0.687  | 1.502  | 0.552  | 1.914  | 1.368  | 1.927  | 1.605  | 2.299  | 1.920  | 56525 | ZNF235   | NM_019941_7_+1  |
| Sept6    | 3.286  | 2.487  | 3.995  | 3.806  | 2.909  | 2.598  | 2.530  | 2.572  | 2.231  | 1.669  | 56526 | SEPT6    | NM_019942_X_-1  |
| Pap0lb   | -4.981 | -4.981 | -4.961 | -4.961 | -2.404 | -2.241 | -4.841 | -4.977 | -4.981 | -4.981 | 56522 | PAPOLB   | NM_019943_5_-1  |
| Mast1    | -1.830 | -4.981 | 0.597  | 0.527  | 0.338  | 0.480  | -0.383 | -0.382 | 0.599  | 0.713  | 56527 | MAST1    | NM_019945_8_-1  |
| Mgst1    | 2.634  | 0.894  | 1.254  | 2.022  | 2.111  | 2.579  | 4.372  | 4.955  | 8.971  | 8.789  | 56615 | MGST1    | NM_019946_6_+1  |
| Clec4e   | -4.981 | -0.602 | -4.316 | -0.244 | -4.019 | 1.002  | 4.316  | 4.180  | 6.451  | 7.090  | 56619 | CLEC4E   | NM_019948_6_-1  |
| Ube2l6   | 6.468  | 5.931  | 6.457  | 6.777  | 5.573  | 5.775  | 6.702  | 6.474  | 6.594  | 6.125  | 56791 | UBE2L6   | NM_019949_2_+1  |
| Chst5    | -4.981 | -4.981 | -4.941 | -4.941 | -4.959 | -2.573 | -4.742 | -4.952 | -4.981 | -4.981 | 56773 | CHST6    | NM_019950_8_-1  |
| Sec11a   | 7.791  | 7.889  | 6.858  | 7.011  | 6.587  | 6.799  | 6.788  | 6.948  | 6.296  | 6.400  | 56529 | SEC11A   | NM_019951_7_-1  |
| Clc1f    | 3.297  | 0.827  | 3.592  | 3.093  | 4.427  | 4.525  | 3.816  | 3.533  | 1.019  | -1.877 | 56708 | CLCF1    | NM_019952_19_+1 |
| Cnpy2    | 7.757  | 7.483  | 6.129  | 6.208  | 5.566  | 5.686  | 5.895  | 6.089  | 5.273  | 5.436  | 56530 | CNPY2    | NM_019953_10_+1 |
| Ripk3    | 3.986  | 4.459  | 5.217  | 5.821  | 4.254  | 3.959  | 5.020  | 5.290  | 4.231  | 4.528  | 56532 | RIPK3    | NM_019955_14_-1 |
| Dnase2b  | -4.981 | -4.981 | -3.442 | -4.967 | -3.498 | -4.748 | -1.631 | -4.628 | -4.981 | -4.981 | 56629 | DNASE2B  | NM_019957_3_-1  |
| C1qtnf1  | -3.438 | -4.981 | -4.783 | -4.923 | -4.961 | -4.943 | -4.932 | -4.973 | -4.981 | -4.981 | 56745 | C1QTNF1  | NM_019959_11_+1 |
| Pex3     | 5.854  | 5.618  | 5.028  | 4.980  | 4.983  | 4.900  | 5.147  | 4.868  | 4.910  | 4.704  | 56535 | PEX3     | NM_019961_10_-1 |
| Stat2    | 6.455  | 6.282  | 6.085  | 5.597  | 6.740  | 6.526  | 6.128  | 5.852  | 6.883  | 6.314  | 20847 | STAT2    | NM_019963_10_+1 |
| Dnajb12  | 4.246  | 4.213  | 4.239  | 4.323  | 4.225  | 4.389  | 4.255  | 4.367  | 4.027  | 3.920  | 56709 | DNAJB12  | NM_019965_10_+1 |
| Mlycd    | 4.861  | 4.832  | 4.554  | 4.574  | 4.473  | 4.510  | 4.489  | 4.409  | 4.445  | 4.149  | 56690 | MLYCD    | NM_019966_8_+1  |
| Arl10    | 2.652  | 2.766  | 2.442  | 2.507  | 2.926  | 3.182  | 2.956  | 3.045  | 3.030  | 3.599  | 56795 | ARL10    | NM_019968_13_+1 |
| Plag1    | -0.539 | 0.361  | -2.195 | -1.092 | -2.538 | -2.326 | -2.025 | -2.406 | -1.417 | -0.941 | 56711 | PLAG1    | NM_019969_4_-1  |
| Pdgfc    | 1.564  | 2.833  | -2.226 | -1.991 | -1.193 | -3.362 | -1.280 | -0.888 | -4.981 | -3.459 | 54635 | PDGFC    | NM_019971_3_+1  |
| Sort1    | 5.024  | 5.906  | 4.553  | 4.035  | 5.247  | 5.663  | 4.506  | 4.175  | 6.658  | 6.689  | 20661 | SORT1    | NM_019972_3_+1  |
| Son      | 5.415  | 4.794  | 5.591  | 5.388  | 6.614  | 6.252  | 6.892  | 6.623  | 5.155  | 4.548  | 20658 | SON      | NM_019973_16_+1 |
| Klk11    | -4.981 | -4.981 | -4.981 | -4.981 | -4.930 | -4.956 | -4.981 | -4.981 | -4.981 | -4.981 | 56538 | KLK11    | NM_019974_7_+1  |
| Had1     | 4.151  | 4.178  | 2.528  | 2.582  | 2.509  | 2.696  | 2.871  | 2.816  | 2.990  | 2.970  | 56794 | HACL1    | NM_019975_14_-1 |
| Psrc1    | 1.667  | 0.579  | 0.819  | 0.410  | 1.660  | 0.514  | 1.079  | -0.041 | -0.599 | -0.935 | 56742 | PSRC1    | NM_019976_3_+1  |
| Selk     | 8.615  | 8.714  | 7.710  | 7.699  | 7.801  | 7.982  | 7.901  | 7.822  | 7.239  | 7.225  | 80795 | SELENOK  | NM_019979_14_+1 |
| Litaf    | 9.205  | 9.491  | 7.628  | 7.800  | 5.717  | 5.878  | 7.245  | 7.437  | 8.396  | 8.106  | 56722 | LITAF    | NM_019980_16_-1 |
| Sez6l    | -4.405 | -4.981 | -4.562 | -4.847 | -4.412 | -4.675 | -4.750 | -4.830 | -4.981 | -4.981 | 56747 | SEZ6L    | NM_019982_5_-1  |
| Rabgef1  | -0.672 | -0.583 | -2.991 | -1.711 | -0.100 | -0.852 | 0.369  | 0.229  | 0.374  | 0.483  | 56715 | RABGEF1  | NM_019983_5_+1  |
| Tgm1     | -3.446 | -3.235 | -4.151 | -4.429 | -3.154 | -4.686 | -3.806 | -4.739 | -3.937 | -3.152 | 21816 | TGM1     | NM_019984_14_-1 |
| Clec1b   | 1.622  | 1.041  | 1.659  | 0.657  | 1.292  | 0.166  | 2.117  | 0.382  | 0.794  | 1.817  | 56760 | CLEC1B   | NM_019985_6_+1  |
| Habp4    | 3.571  | 3.536  | 5.109  | 5.382  | 3.660  | 4.114  | 3.808  | 4.138  | 4.685  | 4.184  | 56541 | HABP4    | NM_019986_13_+1 |
| Ick      | 1.413  | 1.057  | 0.793  | 0.298  | 0.217  | -1.953 | 0.825  | 1.160  | 2.016  | 2.432  | 56542 | ICK      | NM_019987_9_+1  |
| Mlst8    | 3.046  | 2.684  | 1.770  | 3.234  | 2.537  | 3.613  | 3.261  | 3.508  | 3.503  | 3.866  | 56716 | MLST8    | NM_019988_17_-1 |
| Sh3bgrl  | 6.706  | 6.687  | 8.369  | 8.416  | 8.072  | 8.381  | 8.375  | 8.384  | 8.074  | 8.904  | 56726 | SH3BGRL  | NM_019989_X_+1  |
| Stard10  | 1.112  | 1.179  | 3.325  | 3.615  | 2.171  | 3.258  | 2.522  | 3.633  | 1.069  | 1.658  | 56018 | STARD10  | NM_019990_7_+1  |
| Stap1    | 5.373  | 5.660  | 5.514  | 5.302  | 6.512  | 6.413  | 6.221  | 5.784  | 4.789  | 4.122  | 56792 | STAP1    | NM_019992_5_+1  |
| Aldh9a1  | 5.966  | 5.910  | 6.314  | 6.493  | 5.597  | 5.531  | 6.068  | 6.424  | 6.213  | 6.500  | 56752 | ALDH9A1  | NM_019993_1_+1  |
| Ralgapa1 | 2.768  | 2.050  | 2.840  | 2.714  | 3.310  | 2.451  | 2.137  | 1.586  | 1.127  | 1.336  | 56784 | RALGAPA1 | NM_019994_12_-1 |
| Supt20   | 4.879  | 4.995  | 5.768  | 5.918  | 6.288  | 6.172  | 5.357  | 5.450  | 4.783  | 5.256  | 56790 | NA       | NM_019995_3_+1  |
| Phax     | 5.954  | 6.028  | 5.765  | 5.799  | 5.550  | 5.355  | 5.535  | 5.348  | 5.247  | 5.078  | 56698 | PHAX     | NM_019996_18_+1 |
| Alg2     | 4.757  | 4.955  | 3.987  | 4.181  | 3.658  | 3.734  | 3.864  | 4.032  | 3.292  | 3.379  | 56737 | ALG2     | NM_019998_4_-1  |
| Pnkd     | -1.828 | 0.040  | 0.466  | 1.143  | 1.234  | 0.388  | 0.191  | -0.410 | -1.073 | -4.897 | 56695 | PNKD     | NM_019999_1_+1  |
| Med8     | 5.934  | 5.826  | 6.053  | 6.186  | 6.039  | 5.956  | 6.006  | 6.026  | 5.877  | 5.917  | 80509 | MED8     | NM_020000_4_+1  |
| Clec4n   | 4.480  | 2.301  | 2.982  | 3.477  | 4.765  | 5.781  | 5.374  | 6.600  | 3.340  | 4.366  | 56620 | CLEC6A   | NM_020001_6_+1  |
| Rec8     | -4.981 | -4.981 | 0.743  | -0.960 | 0.773  | -2.083 | -0.946 | -1.308 | -1.141 | -2.734 | 56739 | REC8     | NM_020002_14_+1 |
| Glmp     | 6.807  | 6.835  | 5.851  | 6.099  | 5.673  | 5.738  | 5.959  | 6.359  | 6.301  | 6.452  | 56700 | GLMP     | NM_020003_3_+1  |
| Kat2a    | 0.599  | 1.626  | 2.922  | 1.919  | 2.811  | 2.005  | 2.197  | 2.122  | 3.218  | 2.722  | 14534 | KAT2A    | NM_020004_11_-1 |
| Kat2b    | 0.019  | 2.266  | 1.317  | 1.690  | 0.467  | 1.279  | 1.248  | 0.454  | 2.320  | 2.403  | 18519 | KAT2B    | NM_020005_17_+1 |
| Cdc42ep4 | -4.684 | -0.676 | -0.268 | -1.028 | -4.888 | -1.226 | -2.230 | -1.094 | 0.932  | 1.464  | 56699 | CDC42EP4 | NM_020006_11_-1 |
| Mbnl1    | 5.927  | 5.547  | 6.946  | 7.190  | 7.194  | 7.350  | 6.417  | 6.925  | 6.851  | 7.324  | 56758 | MBNL1    | NM_020007_3_+1  |
| Clec7a   | -2.516 | -2.098 | 1.719  | 2.611  | 2.173  | 2.885  | 4.670  | 6.864  | 4.521  | 7.617  | 56644 | CLEC7A   | NM_020008_6_-1  |
| Mtor     | 4.034  | 4.354  | 4.921  | 4.883  | 4.592  | 4.704  | 4.235  | 4.390  | 4.270  | 4.189  | 56717 | MTOR     | NM_020009_4_+1  |
| Cyp51    | 6.459  | 6.703  | 5.784  | 4.734  | 5.141  | 5.146  | 5.417  | 5.695  | 5.148  | 5.759  | 13121 | CYP51A1  | NM_020010_5_-1  |
| Sphk2    | 1.401  | 2.499  | 1.538  | 0.804  | 2.214  | 2.431  | 1.238  | 1.274  | 0.318  | 0.631  | 56632 | SPHK2    | NM_020011_7_-1  |
| Rnf14    | 4.496  | 5.423  | 4.924  | 5.169  | 4.525  | 5.132  | 4.374  | 4.274  | 4.937  | 4.985  | 56736 | RNF14    | NM_020012_18_+1 |
| Gfra4    | -4.981 | -3.656 | -4.978 | -4.666 | -4.918 | -4.963 | -4.975 | -4.752 | -4.981 | -4.639 | 14588 | GFRA4    | NM_020014_2_-1  |
| Rfc2     | 6.502  | 6.481  | 6.042  | 6.307  | 6.880  | 6.828  | 6.622  | 6.631  | 6.388  | 6.129  | 19718 | RFC2     | NM_020022_5_+1  |
| Taf10    | 7.684  | 7.508  | 7.528  | 7.551  | 7.625  | 7.770  | 7.747  | 7.488  | 6.637  | 6.461  | 24075 | TAF10    | NM_020024_7_-1  |
| B3galt2  | -0.011 | -1.716 | -1.227 | -0.715 | 0.119  | 0.403  | -0.889 | -1.624 | -2.053 | -1.850 | 26878 | B3GALT2  | NM_020025_1_+1  |
| B3galnt1 | 6.332  | 7.120  | -0.113 | 1.361  | 1.655  | 2.893  | 0.072  | 1.885  | -0.352 | 2.506  | 26879 | B3GALNT1 | NM_020026_3_-1  |
| Prrc2a   | 2.044  | 2.382  | 3.063  | 3.371  | 3.150  | 3.316  | 3.159  | 2.182  | 2.281  | 2.551  | 53761 | PRRC2A   | NM_020027_17_-1 |
| Lpar2    | -1.245 | -1.439 | -1.954 | -1.463 | -1.898 | -0.898 | -1.972 | -1.681 | -2.989 | -2.269 | 53978 | LPAR2    | NM_020028_8_+1  |
| Raet1d   | -4.981 | -2.573 | -4.782 | -4.971 | -4.535 | -4.212 | -2.819 | -4.764 | -2.900 | -3.867 | 56554 | NA       | NM_020030_10_+1 |
| Poll     | -0.479 | -2.137 | 3.348  | 3.179  | 3.482  | 3.037  | 3.157  | 2.850  | 3.124  | 3.026  | 56626 | POLL     | NM_020032_19_-1 |
| Ankrd2   | -1.123 | -3.408 | -3.475 | -4.926 | -3.681 | -4.665 | -3.778 | -4.688 | -4.981 | -4.981 | 56642 | ANKRD2   | NM_020033_19_+1 |

|           |        |        |        |        |        |        |        |        |        |        |       |           |                 |
|-----------|--------|--------|--------|--------|--------|--------|--------|--------|--------|--------|-------|-----------|-----------------|
| Hist1h1b  | -3.090 | -0.356 | 2.744  | 2.275  | 3.604  | 2.729  | 2.696  | 1.418  | 1.571  | 0.131  | 56702 | NA        | NM_020034_13_-1 |
| Pigo      | 0.946  | 0.277  | 1.564  | 2.575  | 1.954  | 1.586  | -0.688 | 0.808  | 1.266  | 1.908  | 56703 | PIGO      | NM_020035_4_-1  |
| Caln4     | 2.315  | 2.576  | -4.552 | -4.926 | -4.820 | -3.710 | -4.980 | -4.979 | -2.871 | -4.981 | 80796 | CALML5    | NM_020036_13_+1 |
| Mocs1     | -3.728 | 1.053  | 0.873  | -0.290 | 0.497  | 0.369  | 1.770  | 2.377  | 4.335  | 4.250  | 56738 | NA        | NM_020042_17_+1 |
| Lat2      | 7.343  | 7.759  | 5.381  | 5.963  | 5.773  | 6.221  | 6.443  | 6.916  | 6.077  | 6.002  | 56743 | LAT2      | NM_020044_5_-1  |
| Nfu1      | 6.676  | 6.545  | 6.612  | 6.429  | 6.694  | 6.555  | 6.597  | 6.128  | 5.799  | 5.177  | 56748 | NFU1      | NM_020045_6_+1  |
| Dhodh     | 4.694  | 4.852  | 3.715  | 3.796  | 4.099  | 4.390  | 3.979  | 4.069  | 3.929  | 3.536  | 56749 | DHODH     | NM_020046_8_-1  |
| Tacstd2   | -4.981 | -4.981 | -3.951 | -1.225 | -1.853 | 0.587  | 0.882  | 1.958  | 2.264  | 1.425  | 56753 | TACSTD2   | NM_020047_6_-1  |
| Med20     | 5.424  | 5.553  | 4.949  | 5.128  | 4.980  | 5.108  | 4.950  | 5.230  | 5.003  | 5.070  | 56771 | MED20     | NM_020048_17_+1 |
| Tmem9b    | 7.430  | 7.706  | 6.587  | 6.613  | 6.315  | 6.505  | 6.494  | 6.610  | 6.859  | 6.931  | 56786 | TMEM9B    | NM_020050_7_-1  |
| Ascl3     | -3.668 | -4.981 | -3.791 | -4.678 | -4.980 | -4.980 | -4.161 | -3.623 | -2.180 | -1.416 | 56787 | ASCL3     | NM_020051_7_-1  |
| Scube2    | -4.981 | -0.211 | -2.756 | -4.969 | -4.015 | -4.714 | -4.934 | -4.957 | -4.981 | -4.981 | 56788 | SCUBE2    | NM_020052_7_-1  |
| Nrxn1     | -4.981 | -3.407 | -4.967 | -4.401 | -3.534 | -2.985 | -4.981 | -4.981 | -4.981 | -4.981 | 18189 | NRXN1     | NM_020252_17_-1 |
| Nrxn2     | -4.223 | -1.329 | -4.837 | -4.576 | -4.177 | -4.962 | -4.846 | -4.361 | -4.981 | -4.110 | 18190 | NRXN2     | NM_020253_19_+1 |
| Scand1    | 6.848  | 6.697  | 6.299  | 6.123  | 5.726  | 5.608  | 6.345  | 6.035  | 6.026  | 5.611  | 19018 | SCAND1    | NM_020255_2_-1  |
| Zbtb33    | 2.163  | 1.952  | 1.904  | 0.679  | -0.098 | 1.405  | 1.117  | 0.871  | 0.794  | 0.819  | 56805 | ZBTB33    | NM_020256_X_+1  |
| Clec2i    | 6.118  | 4.525  | 4.188  | 3.946  | 5.837  | 4.359  | 5.967  | 4.701  | 6.633  | 5.968  | 93675 | NA        | NM_020257_6_+1  |
| Slc37a2   | 5.810  | 4.660  | 1.902  | -0.491 | 3.589  | 2.163  | 3.346  | 2.445  | 3.280  | 3.063  | 56857 | SLC37A2   | NM_020258_9_-1  |
| Hhip      | -3.349 | -4.981 | -4.923 | -4.700 | -4.976 | -4.976 | -4.981 | -4.981 | -4.981 | -4.981 | 15245 | HHIP      | NM_020259_8_-1  |
| Arhgap31  | -0.479 | -1.980 | 4.905  | 4.541  | 2.634  | 1.494  | 3.821  | 2.750  | 5.002  | 3.973  | 12549 | ARHGAP31  | NM_020260_16_-1 |
| Psg23     | -4.981 | -2.499 | -4.238 | -3.686 | -4.160 | -3.800 | -3.974 | -3.959 | -4.981 | -3.697 | 56868 | NA        | NM_020261_7_-1  |
| Zfp109    | -0.760 | -0.819 | 0.654  | 0.571  | -0.198 | -0.195 | -0.935 | -0.466 | 0.594  | 1.120  | 56869 | NA        | NM_020262_7_-1  |
| Cacna2d2  | -3.688 | -2.954 | -4.358 | -2.524 | -4.280 | -3.237 | -4.978 | -4.670 | -4.981 | -4.052 | 56808 | CACNA2D2  | NM_020263_9_+1  |
| Dkk2      | -1.495 | -4.981 | -2.190 | -2.187 | 3.610  | 2.898  | 1.230  | 0.666  | -3.750 | -0.922 | 56811 | DKK2      | NM_020265_3_+1  |
| Dnajb2    | 0.293  | 1.512  | -1.601 | -0.500 | -0.908 | 0.423  | -2.430 | -1.221 | -1.313 | -1.545 | 56812 | DNAJB2    | NM_020266_1_+1  |
| Trim44    | 5.607  | 5.811  | 5.995  | 5.784  | 5.770  | 5.777  | 5.686  | 5.414  | 5.366  | 5.487  | 80985 | TRIM44    | NM_020267_2_-1  |
| Klkb1b27  | 9.125  | 9.450  | -4.804 | -0.669 | -4.845 | -0.560 | -4.953 | 0.728  | -3.531 | -4.981 | 16619 | KLKB1     | NM_020268_7_+1  |
| Scamp5    | -1.779 | -4.119 | -2.109 | -2.271 | -2.815 | -4.240 | -0.331 | -2.349 | -2.569 | -2.222 | 56807 | SCAMP5    | NM_020270_9_-1  |
| Pdpx      | 2.896  | 2.429  | 2.823  | 2.888  | 4.044  | 4.157  | 2.937  | 2.710  | 1.162  | 0.972  | 57028 | PDXP      | NM_020271_15_+1 |
| Pik3cg    | 2.092  | 1.240  | 4.748  | 2.610  | 4.795  | 4.264  | 4.284  | 4.365  | 5.413  | 5.135  | 30955 | PIK3CG    | NM_020272_12_-1 |
| Gmeb1     | 2.559  | 3.535  | 3.015  | 2.759  | 3.182  | 2.877  | 2.871  | 2.872  | 2.822  | 2.675  | 56809 | GMEB1     | NM_020273_4_-1  |
| Tnfrsf10b | 2.037  | 2.159  | 0.824  | 0.902  | -0.069 | -0.361 | -0.716 | -0.453 | -1.554 | -1.777 | 21933 | TNFRSF10A | NM_020275_14_+1 |
| Nsmf      | -0.316 | -3.366 | 0.562  | -2.951 | -1.023 | -1.698 | -0.189 | 0.267  | -3.799 | 1.073  | 56876 | NSMF      | NM_020276_2_+1  |
| Trpm5     | -4.981 | -4.981 | -3.737 | -4.977 | -4.601 | -4.933 | -4.981 | -4.981 | -4.981 | -4.981 | 56843 | TRPM5     | NM_020277_7_-1  |
| Ccl28     | -3.090 | -2.681 | -4.969 | -4.969 | -4.491 | -4.829 | -4.961 | -4.946 | -4.981 | -4.981 | 56838 | CCL28     | NM_020279_13_+1 |
| Nqo2      | 1.019  | 1.307  | 1.554  | 2.492  | 0.722  | 1.836  | 0.691  | 1.798  | 2.421  | 2.548  | 18105 | NQO2      | NM_020282_13_+1 |
| B3galt1   | -4.981 | -4.981 | -4.964 | -4.609 | -2.808 | -0.328 | -4.966 | -4.705 | -4.981 | -4.981 | 26877 | B3GALT1   | NM_020283_2_+1  |
| Tssc4     | 3.974  | 4.357  | 4.430  | 4.351  | 3.702  | 3.433  | 3.366  | 3.475  | 3.100  | 2.884  | 56844 | TSSC4     | NM_020285_7_+1  |
| Tspan32   | -4.655 | -4.430 | -1.316 | 0.558  | -1.356 | 0.240  | 0.578  | 3.471  | 3.092  | 3.457  | 27027 | TSPAN32   | NM_020286_7_+1  |
| Insm2     | -2.336 | -4.981 | -4.276 | -3.072 | -3.643 | -3.312 | -3.270 | -4.506 | -4.981 | -4.227 | 56856 | INSM2     | NM_020287_12_+1 |
| Lmbr1     | 1.666  | 1.504  | -0.335 | 0.229  | 0.411  | 1.180  | 0.253  | 0.804  | 0.553  | 0.846  | 56873 | LMBR1     | NM_020295_5_-1  |
| Rbms1     | -4.523 | -1.404 | -2.344 | -2.843 | -4.829 | -4.377 | -4.653 | -2.272 | -0.741 | -1.668 | 56878 | RBMS1     | NM_020296_2_-1  |
| Dolpp1    | 3.512  | 3.940  | 3.762  | 3.994  | 3.979  | 3.681  | 3.876  | 3.825  | 4.276  | 4.198  | 57170 | DOLPP1    | NM_020329_2_+1  |
| Gtf2ird1  | -0.594 | 0.182  | -0.903 | -0.229 | -0.021 | -1.282 | 0.345  | -1.332 | -2.304 | 0.387  | 57080 | GTF2IRD1  | NM_020331_5_-1  |
| Ank       | 2.463  | 3.054  | 2.668  | 2.936  | 5.767  | 5.940  | 6.005  | 5.644  | 4.797  | 5.388  | 11732 | ANKH      | NM_020332_15_+1 |
| Slc12a5   | -4.981 | -4.981 | -3.511 | -3.087 | 0.046  | 1.952  | -2.121 | -3.164 | -3.925 | -1.465 | 57138 | SLC12A5   | NM_020333_2_+1  |
| Sap30bp   | 6.441  | 6.316  | 5.096  | 5.108  | 5.357  | 5.252  | 5.200  | 5.273  | 5.165  | 4.930  | 57230 | SAP30BP   | NM_020483_11_+1 |
| Bcam      | -0.929 | -4.981 | -4.947 | -4.322 | 0.771  | -3.482 | -1.222 | -2.102 | -4.981 | -4.316 | 57278 | BCAM      | NM_020486_7_-1  |
| Prss21    | -1.636 | -0.768 | -4.975 | -4.870 | -4.981 | -4.981 | -4.952 | -4.932 | -4.981 | -4.227 | 57256 | PRSS21    | NM_020487_17_+1 |
| Ltb4r2    | -4.981 | -4.981 | -4.947 | -3.904 | -4.356 | -4.942 | -2.560 | -1.668 | -1.319 | -0.895 | 57260 | LTBR2     | NM_020490_14_+1 |
| Sssca1    | 5.310  | 5.036  | 4.477  | 4.407  | 4.349  | 4.395  | 4.478  | 4.391  | 3.376  | 3.039  | 56390 | SSSCA1    | NM_020491_19_-1 |
| Srf       | 3.793  | 3.685  | 4.826  | 4.586  | 4.615  | 4.389  | 4.365  | 4.137  | 4.398  | 4.337  | 20807 | SRF       | NM_020493_17_-1 |
| Ddx24     | 6.557  | 6.368  | 6.282  | 6.144  | 6.956  | 6.840  | 7.088  | 6.671  | 6.986  | 6.493  | 27225 | DDX24     | NM_020494_12_-1 |
| Zfp276    | 2.960  | 3.309  | 5.176  | 5.009  | 3.612  | 3.670  | 3.748  | 4.194  | 5.210  | 5.274  | 57247 | ZNF276    | NM_020497_8_+1  |
| Ly6i      | 2.377  | -2.485 | 2.966  | -0.466 | 0.682  | -4.306 | 5.411  | 0.728  | 4.831  | 1.786  | 57248 | NA        | NM_020498_15_-1 |
| Cldn13    | -4.981 | 2.314  | -0.748 | 3.365  | 0.945  | 4.169  | 0.628  | 4.255  | -1.455 | 0.961  | 57255 | NA        | NM_020504_5_-1  |
| Vav3      | 3.332  | 3.392  | 6.231  | 5.920  | 5.041  | 4.781  | 5.498  | 5.556  | 6.400  | 6.482  | 57257 | VAV3      | NM_020505_3_+1  |
| Xpo4      | 2.386  | 2.462  | 2.867  | 2.592  | 3.998  | 3.392  | 2.932  | 2.891  | 2.941  | 3.002  | 57258 | XPO4      | NM_020506_14_-1 |
| Tob2      | 4.458  | 4.179  | 5.648  | 5.254  | 6.562  | 6.102  | 6.113  | 5.264  | 6.236  | 5.725  | 57259 | TOB2      | NM_020507_15_-1 |
| Brd4      | 4.658  | 4.162  | 3.837  | 3.266  | 3.808  | 3.811  | 4.156  | 3.548  | 3.069  | 3.482  | 57261 | NA        | NM_020508_17_-1 |
| Retnla    | -4.981 | -4.981 | -4.981 | -4.981 | -4.966 | -4.481 | -1.479 | -3.795 | -4.981 | -4.981 | 57262 | NA        | NM_020509_16_+1 |
| Fzd2      | -4.981 | -4.981 | -4.978 | -4.197 | -4.961 | -4.783 | -4.927 | -4.698 | -4.981 | -4.981 | 57265 | FZD2      | NM_020510_11_+1 |
| Olfrl509  | -4.981 | -2.275 | -4.981 | -4.981 | -4.610 | -4.197 | -4.971 | -4.805 | -4.981 | -4.981 | 57271 | OR4E2     | NM_020514_14_+1 |
| Lenep     | 0.919  | 1.177  | 0.864  | 0.518  | 1.381  | 1.366  | 1.366  | 0.349  | 1.197  | 1.110  | 57275 | LENEP     | NM_020517_3_-1  |
| Vsig2     | -4.981 | -4.981 | -3.963 | -2.126 | 0.214  | 1.550  | -2.078 | -1.837 | -4.981 | -4.981 | 57276 | VSIG2     | NM_020518_9_+1  |
| Slc25a20  | 5.112  | 4.963  | 6.477  | 6.207  | 4.998  | 5.053  | 4.987  | 5.325  | 5.246  | 5.345  | 57279 | SLC25A20  | NM_020520_9_+1  |
| Cmpk2     | 2.601  | 1.743  | 1.838  | 1.353  | 3.391  | 2.014  | 4.098  | 3.945  | 6.717  | 6.488  | 22169 | CMPK2     | NM_020557_12_+1 |
| C1d       | 7.183  | 6.967  | 6.543  | 6.505  | 6.684  | 6.716  | 6.770  | 6.558  | 6.032  | 6.448  | 57316 | C1D       | NM_020558_11_+1 |
| Alas1     | 5.626  | 5.877  | 4.730  | 5.260  | 5.786  | 6.290  | 5.612  | 5.790  | 6.280  | 6.317  | 11655 | ALAS1     | NM_020559_9_-1  |
| Mrps31    | 4.869  | 5.002  | 4.091  | 4.023  | 4.082  | 4.230  | 3.839  | 4.144  | 3.774  | 3.763  | 57312 | MRPS31    | NM_020560_8_+1  |
| Smpdl3a   | 4.800  | 4.286  | 6.249  | 6.290  | 5.470  | 5.713  | 7.773  | 8.074  | 10.178 | 10.071 | 57319 | SMPDL3A   | NM_020561_10_+1 |
| Dnajc4    | 5.159  | 4.992  | 4.166  | 4.178  | 4.277  | 4.173  | 4.598  | 4.298  | 4.418  | 3.978  | 57431 | DNAJC4    | NM_020566_19_-1 |
| Gmnn      | 4.317  | 1.590  | 5.068  | 4.439  | 5.467  | 4.672  | 4.945  | 4.195  | 3.383  | 2.234  | 57441 | GMNN      | NM_020567_13_-1 |
| Park7     | 8.361  | 8.260  | 7.695  | 7.672  | 7.914  | 7.843  | 7.701  | 7.522  | 6.296  | 5.979  | 57320 | PARK7     | NM_020569_4_-1  |

|            |        |        |        |        |        |        |        |        |        |        |       |           |                 |
|------------|--------|--------|--------|--------|--------|--------|--------|--------|--------|--------|-------|-----------|-----------------|
| Xrcc2      | 1.333  | 1.287  | 0.852  | 0.828  | 1.238  | 1.160  | 1.384  | 1.548  | 1.893  | 1.101  | 57434 | XRCC2     | NM_020570_5_-1  |
| Aurkc      | -4.981 | -4.822 | -4.978 | -4.968 | -4.975 | -4.979 | -4.981 | -4.981 | -4.974 | -4.954 | 20871 | AURKC     | NM_020572_7_+1  |
| Kcne3      | -1.884 | -4.981 | -3.495 | -1.834 | -3.495 | -1.834 | -3.984 | -1.289 | 2.416  | 3.726  | 2.690 | KCNE3     | NM_020574_7_+1  |
| March7     | 5.165  | 5.225  | 5.786  | 5.639  | 5.840  | 5.791  | 5.470  | 5.550  | 5.794  | 5.880  | 57438 | MARCH7    | NM_020575_2_+1  |
| As3mt      | 6.041  | 5.929  | 4.732  | 4.991  | 4.110  | 4.172  | 4.392  | 4.732  | 3.918  | 4.299  | 57344 | AS3MT     | NM_020577_19_+1 |
| Ehd3       | -1.489 | 2.398  | -4.076 | 0.340  | -2.367 | 1.396  | 0.186  | 2.887  | -1.161 | 0.806  | 57440 | EHD3      | NM_020578_17_+1 |
| B4galt3    | 5.791  | 4.969  | 5.083  | 4.522  | 5.782  | 5.466  | 5.543  | 4.928  | 5.285  | 4.887  | 57370 | B4GALT3   | NM_020579_1_+1  |
| Nelfcd     | 5.601  | 5.564  | 5.002  | 5.414  | 5.634  | 5.542  | 5.571  | 5.604  | 6.135  | 6.115  | 57314 | NELFCD    | NM_020580_2_+1  |
| Angptl4    | -1.670 | -4.981 | -0.339 | -0.302 | 0.437  | -0.392 | -1.184 | 0.773  | -1.635 | -1.292 | 57875 | ANGPTL4   | NM_020581_17_-1 |
| Atp5j2     | 7.978  | 7.684  | 7.780  | 7.789  | 7.655  | 7.618  | 7.938  | 7.776  | 6.854  | 6.658  | 57423 | ATP5J2    | NM_020582_5_-1  |
| Isg20      | 3.781  | 2.650  | 2.638  | 3.340  | 5.368  | 5.006  | 4.932  | 4.722  | 4.584  | 4.311  | 57444 | ISG20     | NM_020583_7_+1  |
| Terf2ip    | 4.424  | 4.317  | 4.440  | 4.559  | 3.973  | 4.036  | 4.139  | 4.330  | 4.141  | 4.464  | 57321 | TERF2IP   | NM_020584_8_+1  |
| Golga7     | 4.295  | 4.385  | 5.003  | 5.284  | 4.826  | 5.231  | 4.710  | 4.957  | 4.666  | 4.640  | 57437 | GOLGA7    | NM_020585_8_-1  |
| Herpud2    | 5.861  | 5.905  | 5.915  | 5.882  | 5.583  | 5.627  | 5.628  | 5.658  | 6.210  | 6.195  | 80517 | HERPUD2   | NM_020586_9_-1  |
| Srsf4      | 5.683  | 5.714  | 5.376  | 5.186  | 5.688  | 5.464  | 5.397  | 5.423  | 5.683  | 5.364  | 57317 | SRSF4     | NM_020587_4_+1  |
| Tmem183a   | 5.464  | 5.448  | 5.449  | 5.378  | 4.850  | 4.672  | 4.826  | 5.199  | 5.439  | 5.327  | 57439 | TMEM183A  | NM_020588_1_-1  |
| Zfp467     | -0.650 | -3.769 | -2.357 | -1.573 | -1.293 | 0.963  | -0.427 | -0.773 | -3.682 | 0.788  | 68910 | ZNF467    | NM_020589_6_-1  |
| Gabaraapl1 | 5.425  | 5.691  | 4.704  | 4.792  | 4.591  | 4.255  | 4.963  | 4.796  | 4.559  | 4.876  | 57436 | GABARAPL1 | NM_020590_6_+1  |
| Fbxo3      | 4.034  | 4.258  | 4.838  | 4.705  | 4.614  | 4.149  | 4.515  | 4.397  | 5.096  | 4.769  | 57443 | FBXO3     | NM_020593_2_+1  |
| Zc3h8      | 2.035  | 2.420  | 2.882  | 2.173  | 2.642  | 1.608  | 2.790  | 1.699  | 2.515  | 1.408  | 57432 | ZC3H8     | NM_020594_2_-1  |
| Egr4       | -4.981 | -4.981 | -1.289 | -3.835 | -3.679 | -2.826 | -4.976 | -3.256 | -4.981 | -3.480 | 13656 | EGR4      | NM_020596_6_-1  |
| Rps14      | 10.244 | 10.516 | 10.322 | 10.564 | 10.045 | 10.416 | 10.405 | 10.670 | 9.498  | 9.696  | 20044 | RPS14     | NM_020600_18_+1 |
| Tbl1x      | 4.497  | 4.198  | 4.874  | 4.994  | 4.442  | 4.266  | 4.143  | 3.717  | 4.579  | 4.462  | 21372 | TBL1X     | NM_020601_X_+1  |
| Wdr46      | 4.310  | 4.404  | 4.545  | 4.848  | 4.581  | 4.517  | 4.654  | 4.802  | 5.190  | 4.755  | 57315 | WDR46     | NM_020603_17_+1 |
| Jph1       | -2.178 | -3.315 | -4.744 | -4.974 | -0.940 | -2.030 | -4.652 | -3.712 | -4.981 | -2.609 | 57339 | JPH1      | NM_020604_1_-1  |
| Jph3       | -2.948 | -1.439 | -2.134 | -3.663 | -3.127 | -3.676 | -2.339 | -4.870 | -1.045 | -4.981 | 57340 | JPH3      | NM_020605_8_+1  |
| Parva      | -1.901 | -4.981 | -3.948 | -4.373 | -4.516 | -4.597 | -3.195 | -3.735 | -4.981 | -4.981 | 57342 | PARVA     | NM_020606_7_+1  |
| Cramp1l    | 2.686  | 3.172  | 3.074  | 2.658  | 3.802  | 3.317  | 3.216  | 2.330  | 2.596  | 2.317  | 57354 | CRAMP1    | NM_020608_17_-1 |
| Nrip3      | -4.981 | -3.408 | -2.620 | -2.152 | -4.258 | -2.691 | -4.952 | -3.721 | -2.177 | -3.816 | 78593 | NRIP3     | NM_020610_7_-1  |
| Srd5a3     | 6.709  | 6.353  | 4.858  | 4.853  | 5.242  | 5.197  | 5.533  | 5.488  | 6.629  | 6.104  | 57357 | SRD5A3    | NM_020611_5_+1  |
| Taf1b      | 5.280  | 4.587  | 4.503  | 3.752  | 4.703  | 4.055  | 4.836  | 4.176  | 5.329  | 4.526  | 21340 | TAF1B     | NM_020614_12_+1 |
| Atp5c1     | 9.556  | 9.457  | 9.288  | 9.227  | 8.849  | 8.718  | 8.721  | 8.758  | 8.643  | 8.558  | 11949 | ATP5C1    | NM_020615_2_-1  |
| Akip1      | 6.046  | 5.893  | 4.576  | 4.354  | 4.681  | 4.619  | 4.712  | 4.259  | 3.319  | 2.831  | 57373 | AKIP1     | NM_020616_7_+1  |
| Smarce1    | 7.140  | 6.850  | 6.862  | 6.718  | 6.831  | 6.597  | 6.614  | 6.392  | 6.161  | 6.077  | 57376 | SMARCE1   | NM_020618_11_-1 |
| Mogs       | 5.336  | 5.672  | 5.850  | 6.288  | 5.261  | 5.729  | 5.525  | 6.347  | 5.875  | 6.316  | 57377 | MOGS      | NM_020619_6_+1  |
| Fam3b      | -1.630 | -2.353 | -0.369 | -0.862 | -0.333 | -0.360 | -0.652 | -3.051 | -4.190 | -4.227 | 52793 | FAM3B     | NM_020622_16_-1 |
| Zbtb22     | 3.289  | 3.038  | 3.559  | 3.388  | 3.650  | 3.377  | 3.648  | 3.382  | 4.733  | 4.266  | 81630 | ZBTB22    | NM_020625_17_+1 |
| Tmem27     | -4.981 | -4.981 | 3.472  | 0.403  | -2.434 | -2.909 | -3.521 | -4.158 | -4.981 | -4.981 | 57394 | TMEM27    | NM_020626_X_+1  |
| Tk2        | 5.334  | 5.203  | 4.551  | 4.850  | 5.444  | 5.449  | 5.182  | 5.185  | 5.328  | 5.011  | 57813 | TK2       | NM_021028_8_-1  |
| Abcc9      | -4.981 | -4.981 | -4.951 | -4.738 | -4.881 | -4.885 | -4.578 | -4.843 | -4.483 | -4.590 | 20928 | ABCC9     | NM_021041_6_-1  |
| Abcc9      | -4.981 | -4.981 | -4.944 | -4.565 | -4.806 | -4.405 | -4.504 | -4.832 | -4.249 | -4.294 | 20928 | ABCC9     | NM_021042_6_-1  |
| Cftr       | -4.981 | -4.981 | -4.660 | -0.871 | -4.910 | -4.516 | -4.981 | -4.981 | -4.981 | -4.227 | 12638 | CFTR      | NM_021050_6_+1  |
| Slc46a2    | -3.843 | -2.681 | -4.607 | -4.628 | -4.885 | -4.881 | -4.794 | -4.873 | -4.981 | -4.342 | 30936 | SLC46A2   | NM_021053_4_-1  |
| Kit        | 2.187  | 0.432  | 6.806  | 6.552  | 7.392  | 7.381  | 6.552  | 5.257  | 0.323  | -0.084 | 16590 | KIT       | NM_021099_5_+1  |
| Fabp7      | -0.251 | -1.693 | -2.163 | -2.449 | -4.901 | -4.473 | -3.312 | -4.188 | 1.122  | 0.613  | 12140 | FABP7     | NM_021272_10_+1 |
| Ckb        | 3.626  | 2.839  | 9.017  | 7.410  | 8.754  | 4.098  | 8.052  | 5.600  | 7.090  | 4.827  | 12709 | CKB       | NM_021273_12_-1 |
| Cxcl10     | 2.941  | 0.822  | 5.996  | 5.369  | 4.383  | 3.752  | 5.432  | 5.947  | 4.817  | 5.207  | 15945 | CXCL10    | NM_021274_5_-1  |
| Tmsb4x     | 13.604 | 13.422 | 14.537 | 14.537 | 14.190 | 14.487 | 14.384 | 14.321 | 14.018 | 14.122 | 19241 | NA        | NM_021278_X_-1  |
| Wnt1       | -3.563 | -4.981 | -4.325 | -4.374 | -4.308 | -4.421 | -4.969 | -4.967 | -4.981 | -4.981 | 22408 | WNT1      | NM_021279_15_+1 |
| Plcg1      | 0.880  | 1.825  | 3.031  | 2.831  | 3.100  | 2.309  | 2.152  | 1.538  | 2.610  | 2.779  | 18803 | PLCG1     | NM_021280_2_+1  |
| Ctss       | 10.884 | 10.864 | 10.067 | 10.029 | 10.601 | 10.525 | 11.131 | 11.070 | 11.632 | 11.532 | 13040 | CTSS      | NM_021281_3_+1  |
| Cyp2e1     | -2.873 | -2.004 | -0.918 | -2.245 | -1.261 | -2.272 | -1.674 | -2.850 | -1.104 | -2.031 | 13106 | CYP2E1    | NM_021282_7_+1  |
| Il4        | -4.981 | -4.981 | -4.930 | -3.483 | -4.045 | -4.627 | -0.661 | -3.356 | -4.981 | -4.981 | 16189 | IL4       | NM_021283_11_-1 |
| Kras       | 6.787  | 7.137  | 6.233  | 6.255  | 6.821  | 7.219  | 6.892  | 6.949  | 6.706  | 6.960  | 16653 | KRAS      | NM_021284_6_-1  |
| Sptbn2     | -4.981 | -4.981 | -2.706 | -2.910 | -0.325 | -0.391 | -2.631 | -3.944 | -1.453 | -1.710 | 20743 | SPTBN2    | NM_021287_19_+1 |
| Tyms       | 3.982  | 3.934  | 4.769  | 5.046  | 5.368  | 5.108  | 4.470  | 4.443  | 2.614  | 2.084  | 22171 | TYMS      | NM_021288_5_-1  |
| Evc        | -1.124 | -1.814 | -4.946 | -4.946 | -4.983 | -4.579 | -4.949 | -2.796 | -4.981 | -4.981 | 59056 | EVC       | NM_021292_5_-1  |
| Cd33       | 4.756  | 3.787  | 2.895  | 2.429  | 2.216  | 2.685  | 3.327  | 4.235  | 5.386  | 4.999  | 12489 | NA        | NM_021293_7_-1  |
| Dbil5      | -0.619 | 0.099  | -1.608 | -1.603 | -1.519 | -1.949 | -2.848 | -4.314 | -3.531 | -4.981 | 13168 | NA        | NM_021294_11_+1 |
| Lanc1l     | 6.330  | 6.243  | 4.100  | 4.080  | 4.017  | 4.316  | 3.600  | 3.383  | 3.122  | 0.995  | 14768 | LANCL1    | NM_021295_1_-1  |
| Grpel2     | 4.894  | 5.037  | 4.556  | 4.468  | 4.595  | 4.205  | 4.382  | 4.630  | 4.086  | 4.302  | 17714 | GRPEL2    | NM_021296_18_-1 |
| Tlr4       | 1.240  | 0.761  | 2.599  | 2.768  | 2.309  | 1.352  | 3.189  | 4.006  | 4.953  | 5.166  | 21898 | TLR4      | NM_021297_4_+1  |
| Ak3        | 5.551  | 5.648  | 5.943  | 6.222  | 4.910  | 5.223  | 5.194  | 5.614  | 6.054  | 6.230  | 56248 | AK3       | NM_021299_19_-1 |
| Slc15a2    | 2.483  | -2.681 | 0.170  | 0.569  | 0.674  | -1.827 | -0.184 | 0.175  | 1.970  | -1.962 | 57738 | SLC15A2   | NM_021301_16_-1 |
| Stk32c     | -4.981 | -4.981 | -0.667 | 0.131  | 2.289  | 1.803  | 0.420  | -1.763 | -4.981 | -4.981 | 57740 | STK32C    | NM_021302_7_-1  |
| Noc2l      | 5.909  | 6.391  | 6.373  | 6.876  | 6.877  | 7.347  | 6.813  | 6.833  | 6.317  | 5.904  | 57741 | NOC2L     | NM_021303_4_+1  |
| Abhd1      | -1.625 | 4.777  | -4.733 | 3.639  | -3.761 | 4.822  | -2.111 | 4.818  | -4.809 | 4.432  | 57742 | NA        | NM_021304_5_+1  |
| Sec61a2    | 3.654  | 3.499  | 2.473  | 2.752  | 2.825  | 2.986  | 2.762  | 2.537  | 2.195  | 2.640  | 57743 | SEC61A2   | NM_021305_2_-1  |
| Ecel1      | -4.981 | -4.981 | -4.955 | -4.733 | -2.466 | -2.622 | -4.935 | -4.905 | -4.981 | -4.981 | 13599 | ECEL1     | NM_021306_1_-1  |
| Zfp112     | -1.075 | -4.981 | -0.923 | -3.158 | -2.930 | -3.586 | -2.272 | -3.601 | -0.248 | -2.076 | 57745 | ZNF112    | NM_021307_7_+1  |
| Piwi12     | -0.646 | -1.347 | -3.757 | -4.149 | -1.245 | -1.329 | -0.634 | 0.167  | 1.313  | 1.459  | 57746 | PIWIL2    | NM_021308_14_-1 |
| Sh2d2a     | -2.503 | -3.539 | -4.490 | -3.179 | -3.737 | -1.991 | -3.615 | -1.801 | -2.897 | -3.778 | 27371 | SH2D2A    | NM_021309_3_+1  |
| Jmy        | 3.665  | 3.619  | 3.253  | 2.768  | 3.167  | 3.643  | 2.698  | 2.966  | 3.333  | 3.192  | 57748 | JMY       | NM_021310_13_-1 |
| Wdr12      | 2.606  | 2.814  | 4.320  | 4.781  | 3.953  | 4.165  | 3.332  | 4.003  | 0.365  | 0.792  | 57750 | WDR12     | NM_021312_1_-1  |

|           |        |        |        |        |        |        |        |        |        |        |        |           |                 |
|-----------|--------|--------|--------|--------|--------|--------|--------|--------|--------|--------|--------|-----------|-----------------|
| Rnf25     | 4.315  | 4.715  | 3.982  | 4.132  | 3.936  | 3.827  | 3.985  | 3.651  | 4.273  | 3.967  | 57751  | RNF25     | NM_021313_1_-1  |
| Tacc2     | 0.092  | -1.284 | -3.985 | -4.501 | -3.562 | -2.595 | -4.081 | -3.499 | -2.642 | -2.471 | 57752  | TACC2     | NM_021314_7_+1  |
| Noc3l     | 3.111  | 2.974  | 3.305  | 3.238  | 3.342  | 3.028  | 2.968  | 3.239  | 2.634  | 2.813  | 57753  | NOC3L     | NM_021315_19_-1 |
| Cend1     | -4.981 | -4.981 | -3.696 | -4.004 | -4.981 | -4.981 | -4.976 | -4.974 | -4.981 | -2.750 | 57754  | CEND1     | NM_021316_7_-1  |
| Dnajb7    | -3.843 | -2.587 | -2.009 | -3.177 | -3.138 | -3.661 | -3.032 | -3.613 | -2.425 | -2.396 | 57755  | DNAJB7    | NM_021317_15_-1 |
| Pglyrp2   | -1.726 | -4.573 | -1.402 | -3.908 | 0.299  | -1.292 | -3.122 | -0.992 | -4.973 | -4.868 | 57757  | PGLYRP2   | NM_021319_17_-1 |
| Ntn4      | -4.981 | -0.345 | 1.217  | -1.781 | -3.099 | -3.780 | -1.385 | -2.137 | -1.719 | -1.781 | 57764  | NTN4      | NM_021320_10_+1 |
| Wdr4      | 3.093  | 3.094  | 3.341  | 3.503  | 3.400  | 3.340  | 3.057  | 3.235  | 3.050  | 2.995  | 57773  | WDR4      | NM_021322_17_-1 |
| Ttyh1     | -4.213 | -1.414 | -4.981 | -4.979 | -4.905 | -4.892 | -4.966 | -4.773 | -4.977 | -4.981 | 57776  | TTYH1     | NM_021324_7_+1  |
| Cd200r1   | 5.999  | 6.909  | 5.155  | 3.788  | 4.767  | 3.290  | 4.457  | 3.540  | 3.181  | 3.816  | 57781  | CD200R1   | NM_021325_16_+1 |
| Rbak      | -3.516 | -2.890 | -3.386 | -1.719 | -2.776 | -0.422 | -1.819 | -1.413 | 0.563  | 1.076  | 57782  | RBAK      | NM_021326_5_-1  |
| Tnip1     | 0.499  | 1.732  | -0.224 | 2.769  | 2.506  | 2.261  | 0.342  | 1.346  | -1.043 | 1.681  | 57783  | TNIP1     | NM_021327_11_-1 |
| Bin3      | 7.717  | 7.687  | 7.462  | 7.527  | 7.064  | 6.735  | 7.108  | 6.953  | 7.200  | 6.799  | 57784  | BIN3      | NM_021328_14_+1 |
| Rangrf    | 4.127  | 4.169  | 3.912  | 3.827  | 2.883  | 3.157  | 2.951  | 3.387  | 0.619  | 0.408  | 57785  | RANGRF    | NM_021329_11_-1 |
| Acp1      | 5.516  | 4.975  | 5.135  | 4.927  | 4.990  | 5.002  | 4.934  | 4.779  | 4.247  | 4.084  | 11431  | ACP1      | NM_021330_12_-1 |
| Glp1r     | -2.842 | -1.446 | -4.902 | -0.548 | -4.970 | -4.916 | -4.891 | -4.510 | -4.981 | -4.981 | 14652  | GLP1R     | NM_021332_17_+1 |
| Itgax     | 6.121  | 5.355  | 8.238  | 8.141  | 9.311  | 9.330  | 9.030  | 8.341  | 4.483  | 3.947  | 16411  | ITGAX     | NM_021334_7_+1  |
| Snrpb2    | 6.844  | 6.724  | 6.297  | 6.197  | 6.256  | 6.179  | 6.456  | 6.204  | 5.470  | 5.898  | 20639  | SNRPB2    | NM_021335_2_+1  |
| Snrpa1    | 6.038  | 6.508  | 6.394  | 6.902  | 6.310  | 6.511  | 6.003  | 6.198  | 4.631  | 4.835  | 68981  | SNRPA1    | NM_021336_7_+1  |
| Skiv2l    | 4.369  | 4.273  | 5.694  | 5.585  | 5.936  | 5.838  | 5.834  | 5.894  | 6.876  | 6.688  | 108077 | SKIV2L    | NM_021337_17_-1 |
| Rpl35a    | 3.566  | 1.713  | 3.338  | 2.892  | 2.801  | 2.142  | 2.940  | 1.912  | 0.950  | 0.382  | 57808  | RPL35A    | NM_021338_16_+1 |
| Cdon      | 1.132  | 0.673  | 3.865  | 0.790  | 4.466  | -0.555 | 2.618  | -0.563 | -2.150 | 0.063  | 57810  | CDON      | NM_021339_9_+1  |
| Spata5    | 2.485  | 3.206  | 3.432  | 3.549  | 2.731  | 2.377  | 0.688  | 1.899  | 1.466  | 1.471  | 57815  | SPATA5    | NM_021343_3_+1  |
| Tesc      | -0.424 | -0.251 | -1.858 | -0.174 | 1.712  | 1.388  | 1.115  | 1.172  | -2.119 | -2.436 | 57816  | TESC      | NM_021344_5_+1  |
| Hacd3     | 4.704  | 4.561  | 5.310  | 5.529  | 4.151  | 4.447  | 4.226  | 5.057  | 5.312  | 5.365  | 57874  | HACD3     | NM_021345_9_-1  |
| Zfp318    | -4.708 | -1.289 | 1.955  | 1.544  | -0.375 | 0.985  | 0.247  | 1.709  | 0.561  | 0.336  | 57908  | ZNF318    | NM_021346_17_+1 |
| Gsdma     | -4.981 | -4.981 | -4.981 | -4.981 | -4.929 | -4.929 | -2.640 | -3.557 | -1.692 | -3.205 | 57911  | GSDMA     | NM_021347_11_+1 |
| Tnfrsf13b | 4.984  | 4.923  | 0.710  | 1.245  | 3.098  | 3.564  | 3.287  | 3.811  | 3.487  | 3.340  | 57916  | TNFRSF13B | NM_021349_11_+1 |
| Chml      | 2.277  | 2.569  | 2.693  | 2.228  | 1.973  | 1.774  | 2.729  | 2.393  | 2.925  | 3.893  | 12663  | CHML      | NM_021350_1_-1  |
| Cryba4    | -1.576 | -4.981 | -3.273 | -3.835 | -1.593 | -0.459 | -0.928 | -0.421 | 2.365  | 1.663  | 12959  | CRYBA4    | NM_021351_5_-1  |
| Crybb3    | -4.981 | -4.981 | -4.978 | -4.964 | -4.937 | -4.977 | -4.980 | -4.980 | -4.981 | -4.981 | 12962  | CRYBB3    | NM_021352_5_-1  |
| Slc26a3   | -4.981 | -4.981 | -4.981 | -4.981 | -4.920 | -4.088 | -4.505 | -4.754 | -4.981 | -4.981 | 13487  | SLC26A3   | NM_021353_12_+1 |
| Drg2      | 5.765  | 5.824  | 5.382  | 5.517  | 5.364  | 5.272  | 5.165  | 5.113  | 4.963  | 4.624  | 13495  | DRG2      | NM_021354_11_+1 |
| Gab1      | -2.115 | -4.981 | -4.121 | -1.702 | -2.588 | -2.040 | -0.071 | 0.980  | 2.988  | 4.589  | 14388  | GAB1      | NM_021356_8_-1  |
| Neurl1a   | -4.804 | -4.805 | -4.845 | -3.334 | -4.606 | -3.611 | -4.973 | -4.961 | -4.973 | -4.972 | 18011  | NEURL1    | NM_021360_19_+1 |
| Clec5a    | -2.630 | -4.981 | 0.117  | 0.801  | -0.174 | 0.910  | 2.924  | 4.006  | 4.819  | 5.131  | 23845  | CLEC5A    | NM_021364_6_-1  |
| Xlr4b     | 0.021  | 0.558  | -0.695 | -0.042 | 1.410  | 1.989  | 0.610  | 0.652  | -2.743 | 0.190  | 27083  | NA        | NM_021365_X_+1  |
| Klf13     | 6.787  | 6.411  | 4.878  | 4.589  | 6.418  | 6.093  | 7.003  | 6.650  | 8.151  | 7.513  | 50794  | KLF13     | NM_021366_7_-1  |
| Tslp      | -2.993 | -4.981 | -3.740 | -4.889 | -3.758 | -4.900 | -3.237 | -4.955 | -2.841 | -4.977 | 53603  | TSLP      | NM_021367_18_+1 |
| Caln1     | -4.981 | -4.981 | -4.981 | -4.981 | -4.975 | -3.510 | -4.981 | -4.981 | -4.981 | -4.981 | 140904 | CALN1     | NM_021371_5_+1  |
| Sertad2   | 0.996  | 0.139  | 0.971  | 1.093  | 2.033  | 2.532  | 0.708  | 1.549  | 0.090  | 0.483  | 58172  | SERTAD2   | NM_021372_11_+1 |
| Rgs20     | -4.981 | -4.981 | -4.908 | -4.974 | -4.973 | -4.969 | -4.981 | -4.981 | -4.894 | -3.566 | 58175  | RGS20     | NM_021374_1_-1  |
| Rhbg      | -4.981 | -4.981 | 0.508  | 1.058  | -4.644 | -4.882 | -2.349 | -3.271 | -4.981 | -4.981 | 58176  | RHBG      | NM_021375_3_-1  |
| Prokr1    | -2.273 | -2.437 | -3.315 | -3.021 | -2.924 | -3.595 | -3.429 | -3.747 | -0.787 | -0.010 | 58182  | PROKR1    | NM_021381_6_-1  |
| Cnot9     | 5.468  | 5.204  | 5.486  | 5.564  | 5.758  | 5.529  | 5.515  | 5.391  | 5.076  | 5.033  | 58184  | CNOT9     | NM_021383_1_+1  |
| Rsad2     | 3.034  | 2.121  | 3.022  | 3.629  | 5.068  | 5.030  | 5.494  | 4.626  | 6.036  | 4.968  | 58185  | RSAD2     | NM_021384_12_-1 |
| Rad18     | 2.111  | 2.123  | 2.668  | 2.270  | 3.379  | 2.737  | 2.651  | 2.401  | 1.473  | 0.791  | 58186  | RAD18     | NM_021385_6_-1  |
| Cldn10    | -0.774 | -0.751 | -0.787 | -1.182 | 1.026  | 0.973  | 1.277  | 0.405  | -4.981 | -3.855 | 58187  | CLDN10    | NM_021386_14_+1 |
| Extl2     | 1.313  | 1.729  | 1.879  | 0.972  | -0.268 | -0.163 | -0.602 | 1.605  | 3.207  | 2.540  | 58193  | EXTL2     | NM_021388_3_+1  |
| Sh3kbp1   | 5.160  | 5.414  | -0.364 | 2.099  | 2.371  | 3.609  | 2.729  | 5.080  | 1.342  | 1.665  | 58194  | SH3KBP1   | NM_021389_X_+1  |
| Ppp1r1a   | -4.981 | -4.981 | 0.459  | 0.861  | -4.013 | -2.625 | -3.794 | -4.483 | -2.936 | -3.855 | 58200  | PPP1R1A   | NM_021391_15_-1 |
| Ap4m1     | 2.567  | 2.774  | 2.016  | 2.472  | 2.170  | 2.351  | 1.956  | 2.594  | 2.391  | 2.823  | 11781  | AP4M1     | NM_021392_5_+1  |
| Nelfb     | 5.280  | 5.319  | 5.864  | 6.020  | 6.054  | 6.038  | 6.204  | 6.273  | 6.516  | 6.580  | 58202  | NELFB     | NM_021393_2_-1  |
| Zbp1      | 2.206  | 0.749  | 3.139  | 3.094  | 4.356  | 2.666  | 4.820  | 4.226  | 6.412  | 5.338  | 58203  | ZBP1      | NM_021394_2_-1  |
| Hyou1     | 3.674  | 5.074  | 4.646  | 6.079  | 3.549  | 4.809  | 3.290  | 5.799  | 4.305  | 6.501  | 12282  | HYOU1     | NM_021395_9_+1  |
| Pdcd1lg2  | 0.460  | -1.668 | 1.592  | 1.353  | 5.045  | 5.469  | 4.635  | 3.875  | 0.316  | 0.898  | 58205  | PDCD1LG2  | NM_021396_19_+1 |
| Zbtb32    | -0.582 | -1.941 | -0.199 | -1.079 | -1.034 | -0.928 | 1.167  | 2.428  | -0.246 | 1.105  | 58206  | ZBTB32    | NM_021397_7_-1  |
| Slc43a3   | 4.113  | 3.209  | 1.762  | 2.658  | 3.461  | 3.454  | 2.848  | 3.456  | 2.171  | 1.985  | 58207  | SLC43A3   | NM_021398_2_+1  |
| Bcl11b    | -4.425 | -4.109 | -3.248 | -2.096 | -3.539 | 0.629  | -2.786 | 1.085  | -0.800 | -1.596 | 58208  | BCL11B    | NM_021399_12_-1 |
| Prg4      | -4.981 | -4.981 | -4.981 | -4.981 | -4.677 | -4.661 | -4.924 | -4.559 | -1.141 | -0.209 | 96875  | NA        | NM_021400_1_-1  |
| Ube2j2    | 3.728  | 3.402  | 3.067  | 2.824  | 3.156  | 2.686  | 2.858  | 2.948  | 3.289  | 3.144  | 140499 | UBE2J2    | NM_021402_4_+1  |
| Trem1     | -3.189 | -2.349 | -1.253 | 2.205  | 1.595  | 5.876  | 3.611  | 5.387  | 5.902  | 6.698  | 58217  | TREM1     | NM_021406_17_+1 |
| Trem3     | -1.129 | -1.163 | -2.714 | 0.093  | 3.013  | 3.186  | 5.016  | 4.972  | 5.600  | 5.686  | 58218  | NA        | NM_021407_17_+1 |
| Pard6b    | 0.103  | 0.981  | 0.497  | 0.319  | -0.820 | -0.660 | -2.096 | -2.242 | -4.981 | -2.713 | 58220  | PARD6B    | NM_021409_2_+1  |
| Rab37     | 1.290  | 0.946  | 1.032  | 1.679  | 5.262  | 5.047  | 3.259  | 2.186  | -1.086 | -1.459 | 58222  | RAB37     | NM_021411_11_+1 |
| Mmp19     | -4.981 | -4.981 | -4.079 | -2.060 | -3.831 | -4.744 | -4.460 | -0.630 | 2.547  | 3.819  | 58223  | MMP19     | NM_021412_10_+1 |
| Ahcy12    | 1.594  | 1.204  | 3.428  | 2.964  | 2.569  | 1.593  | 3.253  | 1.651  | 4.096  | 3.589  | 74340  | AHCYL2    | NM_021414_6_+1  |
| Cacna1h   | -4.981 | -4.981 | -4.967 | -2.593 | -4.891 | -4.464 | -1.512 | -1.118 | -4.981 | -2.233 | 58226  | CACNA1H   | NM_021415_17_-1 |
| Fam184b   | -2.925 | -2.533 | -2.659 | -3.984 | -2.925 | 0.157  | -2.222 | -1.745 | -3.531 | -4.981 | 58227  | NA        | NM_021416_5_-1  |
| Rnf8      | 5.171  | 4.873  | 5.088  | 5.023  | 4.891  | 5.008  | 4.733  | 4.748  | 4.631  | 4.826  | 58230  | RNF8      | NM_021419_17_+1 |
| Stk4      | 6.919  | 6.951  | 7.047  | 6.896  | 7.630  | 7.432  | 7.299  | 7.091  | 8.028  | 7.899  | 58231  | STK4      | NM_021420_2_+1  |
| Angel2    | 4.653  | 4.689  | 4.914  | 4.999  | 5.899  | 5.497  | 5.185  | 5.141  | 5.194  | 5.219  | 52477  | ANGEL2    | NM_021421_1_+1  |
| Dnaj4     | 1.481  | 3.007  | 1.680  | 2.889  | 2.419  | 3.831  | 1.676  | 2.729  | 0.102  | 1.353  | 58233  | DNAJ4     | NM_021422_9_+1  |
| Shank3    | -4.981 | -4.981 | -4.966 | -3.442 | -4.872 | -4.695 | -4.318 | -4.577 | -4.981 | -4.316 | 58234  | SHANK3    | NM_021423_15_+1 |

|               |        |        |        |        |        |        |        |        |        |        |        |           |                 |
|---------------|--------|--------|--------|--------|--------|--------|--------|--------|--------|--------|--------|-----------|-----------------|
| Nectin1       | -2.205 | -3.267 | 3.739  | 4.104  | 3.134  | 3.989  | 3.892  | 3.553  | 1.642  | 2.731  | 58235  | NECTIN1   | NM_021424_9_+1  |
| Fam181b       | -2.388 | -4.981 | -4.773 | -3.468 | -4.965 | -3.528 | -4.967 | -1.648 | -4.981 | -4.981 | 58238  | FAM181B   | NM_021427_7_+1  |
| Dexi          | 4.599  | 4.417  | 3.402  | 3.725  | 5.346  | 5.389  | 4.752  | 4.301  | 3.602  | 3.710  | 58239  | DEXI      | NM_021428_16_-1 |
| Hs1bp3        | 2.379  | 2.396  | 1.681  | 2.137  | 2.183  | 2.607  | 2.086  | 2.079  | 3.337  | 3.247  | 58240  | HS1BP3    | NM_021429_12_+1 |
| Rilpl1        | 5.962  | 6.075  | -0.416 | -1.185 | 1.264  | 1.638  | 1.391  | 0.609  | 1.699  | 0.485  | 75695  | RILPL1    | NM_021430_5_-1  |
| Nap1l5        | 0.617  | 1.476  | -4.723 | -4.498 | -2.883 | -3.562 | -2.848 | -4.771 | -4.981 | -4.981 | 58243  | NAP1L5    | NM_021432_6_-1  |
| Stx6          | 5.685  | 5.775  | 5.919  | 5.988  | 5.831  | 5.754  | 5.597  | 5.637  | 5.855  | 5.778  | 58244  | STX6      | NM_021433_1_+1  |
| Gpr180        | 5.299  | 5.321  | 4.317  | 4.329  | 4.318  | 4.430  | 4.155  | 4.370  | 4.135  | 4.252  | 58245  | GPR180    | NM_021434_14_+1 |
| Slc35b4       | 4.681  | 4.500  | 4.697  | 4.551  | 5.474  | 5.340  | 4.996  | 4.977  | 5.199  | 5.289  | 58246  | SLC35B4   | NM_021435_6_-1  |
| Tmeff1        | -4.981 | -1.641 | 3.686  | 3.864  | 0.079  | 2.125  | -1.572 | 0.276  | -1.492 | -4.227 | 230157 | TMEFF1    | NM_021436_4_+1  |
| 1700123O20Rik | 5.705  | 5.779  | 5.423  | 5.578  | 5.229  | 5.120  | 5.092  | 5.196  | 4.929  | 4.963  | 58248  | C14orf119 | NM_021437_14_+1 |
| Fibp          | 6.033  | 5.856  | 5.417  | 5.661  | 5.432  | 5.694  | 5.249  | 5.307  | 4.977  | 4.835  | 58249  | FIBP      | NM_021438_19_+1 |
| Chst11        | 1.036  | -0.951 | 2.047  | 2.443  | 1.383  | 0.086  | 0.323  | -0.112 | -1.455 | -3.461 | 58250  | CHST11    | NM_021439_10_+1 |
| BC100451      | -1.413 | -1.121 | -2.535 | -4.965 | -4.980 | -4.969 | -4.978 | -4.457 | -2.377 | -2.384 | 58251  | CEP295NL  | NM_021440_11_-1 |
| Taf1c         | 3.227  | 3.511  | 3.449  | 3.474  | 3.695  | 3.719  | 3.673  | 3.213  | 4.007  | 3.964  | 21341  | TAF1C     | NM_021441_8_-1  |
| Ccl8          | -4.981 | -4.981 | -4.908 | -4.908 | -3.328 | -4.955 | -4.912 | -4.853 | -4.981 | -4.981 | 20307  | NA        | NM_021443_11_+1 |
| 0610007P14Rik | 7.137  | 7.269  | 5.650  | 5.499  | 5.436  | 5.623  | 5.183  | 5.460  | 4.604  | 4.655  | 58520  | C14orf1   | NM_021446_12_-1 |
| Elp2          | 5.569  | 5.423  | 5.870  | 5.920  | 5.931  | 5.935  | 5.961  | 5.995  | 5.839  | 5.752  | 58523  | ELP2      | NM_021448_18_+1 |
| Crbn          | 3.961  | 3.685  | 3.098  | 2.731  | 3.358  | 1.831  | 2.954  | 2.776  | 3.565  | 3.408  | 58799  | CRBN      | NM_021449_6_-1  |
| Trpm7         | 4.127  | 4.755  | 5.373  | 4.713  | 5.205  | 4.977  | 5.339  | 5.302  | 5.293  | 6.115  | 58800  | TRPM7     | NM_021450_2_-1  |
| Pmaip1        | 6.914  | 6.029  | 9.516  | 9.056  | 10.243 | 9.802  | 9.597  | 8.994  | 7.467  | 8.055  | 58801  | NA        | NM_021451_18_+1 |
| Kcnmb4        | -4.981 | -4.981 | -2.525 | -3.018 | -4.486 | -4.112 | -3.654 | -1.789 | -4.981 | -4.981 | 58802  | KCNMB4    | NM_021452_10_-1 |
| Cdc42ep5      | -2.443 | -4.981 | -2.678 | -2.290 | -4.001 | -3.919 | -4.061 | -3.380 | -4.394 | -2.372 | 58804  | CDC42EP5  | NM_021454_7_-1  |
| MLxipl        | -4.981 | -4.981 | -4.016 | -4.034 | -4.909 | -4.956 | -3.546 | -4.366 | -0.330 | -0.932 | 58805  | MLXIPL    | NM_021455_5_+1  |
| Fzd1          | -3.843 | -4.981 | 5.428  | 5.584  | -4.578 | -4.009 | -2.196 | 2.490  | 0.914  | 4.061  | 14362  | FZD1      | NM_021457_5_-1  |
| Fzd3          | -4.981 | -0.496 | -3.488 | -0.660 | -4.981 | -4.224 | -4.224 | -3.033 | -4.981 | -3.853 | 14365  | FZD3      | NM_021458_14_-1 |
| Lipa          | 5.342  | 5.442  | 7.648  | 7.770  | 6.522  | 7.048  | 6.680  | 7.022  | 7.786  | 8.089  | 16889  | LIPA      | NM_021460_19_-1 |
| Mknk1         | 6.118  | 6.237  | 6.150  | 6.061  | 5.511  | 5.547  | 5.882  | 5.981  | 6.895  | 6.749  | 17346  | MKNK1     | NM_021461_4_+1  |
| Mknk2         | 4.641  | 4.589  | 6.281  | 6.311  | 6.623  | 6.761  | 6.716  | 6.656  | 7.607  | 7.683  | 17347  | MKNK2     | NM_021462_10_-1 |
| Prps1         | 5.365  | 5.821  | 4.947  | 5.629  | 5.394  | 5.805  | 5.108  | 5.639  | 4.187  | 4.411  | 19139  | PRPS1     | NM_021463_X_+1  |
| Stag2         | 4.688  | 5.216  | 5.452  | 4.981  | 5.571  | 5.684  | 6.118  | 5.859  | 6.243  | 6.652  | 20843  | STAG2     | NM_021465_X_+1  |
| Taf1a         | 1.355  | 1.764  | 1.374  | -0.475 | -1.075 | -0.043 | 0.151  | 0.629  | 0.668  | 1.479  | 21339  | TAF1A     | NM_021466_1_+1  |
| Tnni1         | -4.495 | -4.981 | -3.433 | -4.764 | -4.608 | -3.114 | -4.978 | -4.952 | -4.981 | -4.981 | 21952  | TNNI1     | NM_021467_1_+1  |
| Unc13b        | -3.755 | -2.231 | -2.462 | -0.407 | -3.284 | -4.135 | -3.109 | -3.052 | -4.019 | -0.737 | 22249  | UNC13B    | NM_021468_4_+1  |
| Dysf          | -3.672 | -3.272 | -4.748 | -4.822 | -3.882 | -4.578 | -4.563 | -4.086 | -4.611 | -4.653 | 26903  | DYSF      | NM_021469_6_+1  |
| Rnf32         | -4.981 | -4.981 | -4.933 | -3.619 | -4.949 | -4.376 | -4.975 | -2.956 | -4.981 | -4.981 | 56874  | RNF32     | NM_021470_5_+1  |
| Rnase4        | 4.435  | 7.287  | -0.637 | 2.168  | -1.204 | 0.580  | 2.527  | 4.226  | 6.055  | 6.200  | 58809  | RNASE4    | NM_021472_14_+1 |
| Akr1a1        | 9.707  | 9.793  | 9.716  | 9.842  | 9.168  | 9.186  | 9.119  | 9.357  | 9.497  | 9.443  | 58810  | AKR1A1    | NM_021473_4_-1  |
| Efemp2        | -0.778 | -0.144 | 1.230  | 2.011  | -0.681 | -0.379 | -2.730 | 0.388  | 0.416  | 1.729  | 58859  | EFEMP2    | NM_021474_19_+1 |
| Adamdec1      | 2.133  | 1.316  | 1.457  | 1.749  | 3.075  | 6.641  | 2.709  | 6.681  | 0.174  | 2.991  | 58860  | ADAMDEC1  | NM_021475_14_-1 |
| Cysltr1       | -3.072 | -4.575 | 3.628  | 4.539  | 0.961  | 0.746  | 3.706  | 4.308  | 4.456  | 4.963  | 58861  | CYSLTR1   | NM_021476_X_-1  |
| Tdh           | -4.981 | 0.018  | -0.099 | -0.563 | -0.133 | 2.376  | -4.305 | -4.654 | -4.981 | -4.981 | 58865  | NA        | NM_021480_14_-1 |
| Syng4         | -4.882 | -4.981 | -4.754 | -4.030 | -3.560 | -4.393 | -4.975 | -4.966 | -4.977 | -4.976 | 58867  | SYNGR4    | NM_021482_7_-1  |
| Rps6kb2       | 4.842  | 4.732  | 4.266  | 4.258  | 4.713  | 4.624  | 4.457  | 4.374  | 4.740  | 4.345  | 58988  | RPS6KB2   | NM_021485_19_-1 |
| Ghrl          | -4.981 | -2.681 | -4.908 | -4.557 | -4.981 | -4.981 | -4.981 | -4.981 | -4.981 | -4.981 | 58991  | GHRL      | NM_021488_6_-1  |
| F12           | -4.981 | -4.981 | -4.908 | -4.981 | -4.969 | -4.501 | -4.856 | -5.002 | -4.981 | -4.316 | 58992  | F12       | NM_021489_13_-1 |
| Smpd3         | -2.759 | -0.770 | -1.215 | -0.623 | -2.693 | -3.074 | -3.740 | -2.167 | -2.539 | -2.721 | 58994  | SMPD3     | NM_021491_8_-1  |
| Arhgap23      | -0.528 | -0.954 | -0.521 | -0.503 | -0.979 | -0.199 | 1.519  | 1.148  | 4.413  | 3.879  | 58996  | ARHGAP23  | NM_021493_11_+1 |
| Dennd5a       | 4.991  | 5.007  | 6.124  | 5.948  | 6.488  | 6.070  | 6.732  | 6.418  | 7.100  | 7.396  | 19347  | DENND5A   | NM_021494_7_-1  |
| Nectin3       | -4.981 | -4.981 | -3.178 | -0.981 | -3.810 | -3.585 | -3.640 | -3.567 | -4.981 | -3.233 | 58998  | NECTIN3   | NM_021495_16_-1 |
| Nectin3       | -4.981 | -4.981 | -4.862 | -4.978 | -4.910 | -4.973 | -4.981 | -4.980 | -4.981 | -4.981 | 58998  | NECTIN3   | NM_021496_16_-1 |
| Nectin3       | -4.981 | -4.981 | -4.527 | -3.896 | -4.409 | -4.237 | -4.969 | -3.146 | -4.981 | -4.981 | 58998  | NECTIN3   | NM_021497_16_-1 |
| Pole3         | 3.891  | 3.713  | 3.490  | 3.611  | 3.216  | 3.280  | 3.548  | 3.687  | 2.768  | 2.464  | 59001  | POLE3     | NM_021498_4_-1  |
| Wdr8          | 4.587  | 4.727  | 4.260  | 4.294  | 4.476  | 4.509  | 4.247  | 4.487  | 3.530  | 3.890  | 59002  | NA        | NM_021499_4_+1  |
| Maea          | 5.976  | 5.971  | 5.966  | 5.957  | 6.103  | 6.058  | 6.081  | 6.167  | 6.480  | 6.447  | 59003  | MAEA      | NM_021500_5_+1  |
| Pias4         | 4.395  | 4.359  | 3.751  | 3.766  | 3.941  | 3.704  | 3.817  | 3.806  | 4.248  | 4.094  | 59004  | PIAS4     | NM_021501_10_-1 |
| Trappc2l      | 7.234  | 7.167  | 6.106  | 6.144  | 5.948  | 5.961  | 6.105  | 5.986  | 5.795  | 5.557  | 59005  | TRAPPC2L  | NM_021502_8_+1  |
| Ngly1         | 5.609  | 5.905  | 5.931  | 5.832  | 6.019  | 6.255  | 6.136  | 5.930  | 5.548  | 5.895  | 59007  | NGLY1     | NM_021504_14_+1 |
| Anapc5        | 7.326  | 7.396  | 6.582  | 6.543  | 6.533  | 6.395  | 6.473  | 6.636  | 6.909  | 6.587  | 59008  | ANAPC5    | NM_021505_5_-1  |
| Sh3rf1        | 3.222  | 2.587  | 2.709  | 1.380  | 0.594  | 0.627  | 1.212  | 1.120  | 0.551  | 1.464  | 59009  | SH3RF1    | NM_021506_8_+1  |
| Sqrdl         | -4.957 | -4.981 | -4.973 | -4.977 | -4.954 | -4.369 | -4.818 | -4.364 | -1.847 | -1.488 | 59010  | SQRDL     | NM_021507_2_+1  |
| Myoz1         | -4.981 | -4.981 | -4.920 | -3.046 | -3.557 | -4.970 | -4.921 | -4.470 | 0.844  | -1.865 | 59011  | MYOZ1     | NM_021508_14_-1 |
| Hnrrnp1       | 7.471  | 7.740  | 7.334  | 7.358  | 7.814  | 8.037  | 7.370  | 7.278  | 6.269  | 6.762  | 59013  | HNRRNP1   | NM_021510_11_+1 |
| Rrs1          | 4.303  | 3.962  | 4.246  | 4.012  | 4.119  | 3.571  | 4.245  | 3.562  | 3.665  | 2.999  | 59014  | RRS1      | NM_021511_1_+1  |
| Nup160        | 3.596  | 3.262  | 4.348  | 4.236  | 4.433  | 4.513  | 4.261  | 4.199  | 4.503  | 4.662  | 59015  | NUP160    | NM_021512_2_+1  |
| Thap11        | 4.324  | 4.295  | 4.039  | 4.054  | 3.611  | 3.487  | 4.286  | 4.674  | 5.974  | 5.643  | 59016  | THAP11    | NM_021513_8_+1  |
| Pfkm          | -0.542 | -0.526 | -1.302 | -1.100 | -2.921 | -1.465 | -0.600 | -1.508 | -0.402 | -2.942 | 18642  | PFKM      | NM_021514_15_+1 |
| Mark3         | 5.136  | 4.902  | 4.607  | 5.386  | 4.861  | 5.207  | 4.819  | 4.692  | 4.943  | 4.921  | 17169  | MARK3     | NM_021516_12_+1 |
| Pdzk1         | -3.216 | -2.790 | -3.755 | -4.188 | -4.157 | -4.726 | -3.927 | -4.584 | -3.602 | -3.906 | 59020  | PDZK1     | NM_021517_3_+1  |
| Rab2a         | 8.518  | 8.838  | 8.232  | 8.305  | 7.719  | 7.935  | 7.887  | 7.937  | 7.796  | 7.887  | 59021  | RAB2A     | NM_021518_4_+1  |
| Edf1          | 7.750  | 7.574  | 7.375  | 7.466  | 7.541  | 7.634  | 7.789  | 7.499  | 6.595  | 6.523  | 59022  | EDF1      | NM_021519_2_+1  |
| Med12         | 3.489  | 3.763  | 4.317  | 4.445  | 5.128  | 5.025  | 5.158  | 5.101  | 5.266  | 5.600  | 59024  | MED12     | NM_021521_X_+1  |
| Usp14         | 5.817  | 6.013  | 6.107  | 6.435  | 5.798  | 5.842  | 5.885  | 6.017  | 5.434  | 5.406  | 59025  | USP14     | NM_021522_18_-1 |
| Huwe1         | 5.990  | 5.962  | 6.362  | 6.342  | 6.572  | 6.627  | 6.131  | 6.092  | 5.252  | 5.684  | 59026  | HUWE1     | NM_021523_X_+1  |

|           |        |        |        |        |        |        |        |        |        |        |       |           |                 |
|-----------|--------|--------|--------|--------|--------|--------|--------|--------|--------|--------|-------|-----------|-----------------|
| Nampt     | 5.999  | 6.122  | 7.033  | 6.883  | 6.098  | 5.271  | 5.985  | 5.707  | 6.315  | 6.455  | 59027 | NAMPT     | NM_021524_12_+1 |
| Rcl1      | 4.850  | 4.647  | 4.251  | 4.614  | 4.894  | 4.961  | 4.592  | 4.869  | 3.945  | 3.808  | 59028 | RCL1      | NM_021525_19_+1 |
| Psm14     | 7.426  | 7.561  | 7.481  | 7.650  | 7.400  | 7.254  | 7.168  | 7.121  | 6.125  | 6.166  | 59029 | PSMD14    | NM_021526_2_+1  |
| Mkks      | -3.785 | 0.693  | -0.540 | -0.407 | 0.860  | 0.379  | 0.005  | 0.617  | 1.209  | 3.263  | 59030 | MKKS      | NM_021527_2_-1  |
| Chst12    | 6.946  | 7.180  | 5.272  | 5.247  | 5.066  | 4.883  | 5.737  | 5.980  | 7.552  | 7.025  | 59031 | CHST12    | NM_021528_5_+1  |
| Ppp2r3c   | 5.320  | 5.327  | 6.474  | 6.764  | 5.435  | 5.494  | 5.653  | 5.504  | 5.195  | 5.595  | 59032 | PPP2R3C   | NM_021529_12_-1 |
| Slc4a8    | 0.941  | -0.964 | 4.647  | 3.430  | 6.447  | 3.936  | 4.468  | 1.549  | -2.753 | -2.399 | 59033 | SLC4A8    | NM_021530_15_+1 |
| Carm1     | 3.339  | 2.870  | 3.277  | 3.921  | 3.529  | 3.588  | 3.633  | 4.395  | 4.500  | 4.857  | 59035 | CARM1     | NM_021531_9_+1  |
| Dact1     | -4.981 | -4.981 | -3.711 | -2.490 | -4.212 | -3.864 | -2.815 | -4.840 | -2.275 | -2.829 | 59036 | DACT1     | NM_021532_12_+1 |
| Pxmp4     | 5.913  | 5.730  | 4.980  | 5.004  | 4.953  | 5.019  | 4.853  | 4.758  | 4.846  | 4.737  | 59038 | PXMP4     | NM_021534_2_-1  |
| Smu1      | 7.191  | 7.137  | 6.965  | 7.022  | 7.081  | 6.973  | 7.003  | 7.000  | 6.968  | 6.858  | 74255 | SMU1      | NM_021535_4_-1  |
| Rhot1     | 3.589  | 4.319  | 3.668  | 4.148  | 3.583  | 3.438  | 3.538  | 4.111  | 4.146  | 4.618  | 59040 | RHOT1     | NM_021536_11_+1 |
| Stk25     | 6.050  | 4.807  | 5.836  | 4.763  | 5.425  | 4.675  | 5.407  | 4.509  | 5.674  | 4.482  | 59041 | STK25     | NM_021537_1_-1  |
| Cope      | 9.434  | 9.335  | 8.107  | 8.089  | 7.901  | 7.802  | 7.897  | 8.082  | 8.055  | 7.843  | 59042 | COPE      | NM_021538_8_+1  |
| Wsb2      | 5.775  | 5.787  | 5.829  | 5.921  | 6.373  | 6.504  | 5.769  | 5.782  | 5.969  | 6.021  | 59043 | WSB2      | NM_021539_5_+1  |
| Rnf130    | 7.847  | 8.091  | 7.218  | 7.161  | 8.740  | 8.749  | 8.664  | 8.545  | 8.981  | 8.793  | 59044 | RNF130    | NM_021540_11_+1 |
| Kcnk5     | -4.981 | -2.895 | -4.937 | -0.535 | 2.488  | 1.355  | 0.113  | 1.149  | -2.871 | -2.696 | 16529 | KCNK5     | NM_021542_14_-1 |
| Naip7     | -1.175 | -0.307 | 1.008  | -0.886 | 0.036  | -1.488 | 0.802  | -1.719 | 2.123  | 0.371  | 53880 | NA        | NM_021545_13_-1 |
| Necab3    | 0.503  | -1.642 | -0.555 | -1.878 | -2.404 | -3.805 | -2.298 | -2.486 | -4.981 | -1.875 | 56846 | NECAB3    | NM_021546_2_-1  |
| Stard3    | 6.442  | 6.793  | 5.719  | 5.742  | 6.076  | 6.213  | 6.232  | 6.475  | 7.185  | 6.991  | 59045 | STARD3    | NM_021547_11_+1 |
| Arpp19    | 4.171  | 3.839  | 4.314  | 4.233  | 3.946  | 4.062  | 3.914  | 3.542  | 1.939  | 2.330  | 59046 | ARPP19    | NM_021548_9_+1  |
| Pnkp      | 4.633  | 4.888  | 4.205  | 4.339  | 5.238  | 5.323  | 5.264  | 4.623  | 5.380  | 5.474  | 59047 | PNKP      | NM_021549_7_+1  |
| C1galt1c1 | 6.079  | 6.246  | 5.132  | 4.958  | 4.234  | 4.466  | 4.430  | 4.624  | 6.493  | 6.750  | 59048 | C1GALT1C1 | NM_021550_X_-1  |
| Slc22a17  | 1.904  | 1.134  | 0.293  | -0.656 | 1.284  | 1.601  | 0.258  | 0.679  | 0.193  | -0.008 | 59049 | SLC22A17  | NM_021551_14_-1 |
| Nsa2      | 6.825  | 6.744  | 6.770  | 6.824  | 6.856  | 6.791  | 7.129  | 6.761  | 6.092  | 5.970  | 59050 | NSA2      | NM_021552_13_-1 |
| Mettl9    | 4.922  | 4.896  | 4.920  | 4.850  | 4.507  | 4.601  | 5.589  | 5.698  | 5.811  | 6.209  | 59052 | METTL9    | NM_021554_7_+1  |
| Hgh1      | 4.660  | 4.339  | 4.116  | 3.985  | 3.660  | 3.157  | 3.413  | 3.221  | 3.085  | 2.926  | 59053 | HGH1      | NM_021555_15_+1 |
| Mrps30    | 5.906  | 5.394  | 5.522  | 5.293  | 5.381  | 5.015  | 5.519  | 5.156  | 5.474  | 4.840  | 59054 | MRPS30    | NM_021556_13_-1 |
| Rdh11     | 3.762  | 3.622  | 2.763  | 2.484  | 2.640  | 2.292  | 2.578  | 2.695  | 2.846  | 2.678  | 17252 | RDH11     | NM_021557_12_-1 |
| Zfp24     | 4.998  | 4.853  | 4.978  | 4.861  | 4.877  | 4.761  | 4.832  | 4.806  | 4.870  | 5.146  | 59057 | ZNF24     | NM_021559_18_-1 |
| Bhlhe22   | -3.668 | -4.981 | -3.416 | -2.134 | -4.970 | -4.794 | -4.344 | -4.975 | -4.981 | -4.981 | 59058 | BHLHE22   | NM_021560_3_+1  |
| Midn      | -4.504 | -0.647 | -0.160 | 1.011  | 1.207  | 0.982  | -0.597 | 0.234  | 1.584  | 0.466  | 59090 | MIDN      | NM_021565_10_+1 |
| Pcbp4     | 0.932  | 3.106  | -0.685 | -1.445 | 0.608  | 0.165  | -0.918 | -1.437 | -4.190 | -3.853 | 59092 | PCBP4     | NM_021567_9_+1  |
| Pcbp3     | 2.258  | 2.423  | 1.449  | 2.375  | 2.027  | 2.253  | 2.017  | 2.482  | 1.976  | 2.007  | 59093 | PCBP3     | NM_021568_10_-1 |
| Agrn      | 0.536  | 0.704  | 1.715  | 2.129  | 2.296  | 2.408  | 2.530  | 2.319  | 3.672  | 3.466  | 11603 | AGRN      | NM_021604_4_-1  |
| Nek7      | 6.173  | 6.396  | 5.765  | 5.961  | 5.905  | 6.092  | 6.089  | 6.412  | 6.696  | 7.091  | 59125 | NEK7      | NM_021605_1_-1  |
| Nek6      | 7.999  | 8.110  | 7.495  | 7.550  | 4.425  | 4.923  | 3.146  | 3.756  | 0.896  | 1.410  | 59126 | NEK6      | NM_021606_2_+1  |
| Ncstn     | 6.186  | 6.262  | 6.494  | 6.295  | 6.681  | 6.481  | 6.707  | 6.910  | 8.045  | 8.104  | 59287 | NCSTN     | NM_021607_1_-1  |
| Dctn5     | 6.925  | 7.032  | 7.191  | 7.207  | 6.804  | 6.887  | 6.472  | 6.729  | 6.271  | 6.524  | 59288 | DCTN5     | NM_021608_7_+1  |
| Ackr2     | -1.093 | -4.981 | -3.678 | -2.096 | -4.124 | 0.266  | -2.246 | 1.674  | -4.981 | -1.387 | 59289 | ACKR2     | NM_021609_9_+1  |
| Cxcl12    | -2.073 | -1.347 | -2.030 | -2.664 | -3.081 | -2.303 | -2.272 | -2.544 | -2.029 | -3.210 | 20315 | CXCL12    | NM_021704_6_+1  |
| Ap4s1     | 5.898  | 5.670  | 5.173  | 4.996  | 4.998  | 5.020  | 5.338  | 5.072  | 4.589  | 4.607  | 11782 | AP4S1     | NM_021710_12_+1 |
| Myg1      | 5.931  | 5.760  | 4.760  | 4.686  | 5.305  | 5.135  | 4.889  | 4.768  | 4.369  | 3.920  | 60315 | C12orf10  | NM_021713_15_+1 |
| Wbp11     | 5.274  | 5.413  | 5.186  | 5.338  | 5.644  | 5.502  | 5.717  | 5.596  | 5.919  | 5.519  | 60321 | WBP11     | NM_021714_6_-1  |
| Chst7     | -1.139 | -1.272 | 0.804  | 1.597  | 2.479  | 1.872  | 2.648  | 2.007  | -3.925 | -1.362 | 60322 | CHST7     | NM_021715_X_+1  |
| Nrip2     | 2.907  | 8.391  | -1.002 | 0.117  | -3.431 | -1.978 | -4.594 | 0.073  | -1.096 | -0.597 | 60345 | NRIP2     | NM_021717_6_+1  |
| Ms4a4b    | 2.790  | 2.147  | 1.434  | 2.698  | 3.226  | 4.258  | 3.748  | 5.113  | 4.217  | 3.969  | 60361 | NA        | NM_021718_19_+1 |
| Cldn15    | -4.981 | -4.981 | -4.961 | -3.471 | -4.852 | -2.954 | 0.118  | -1.198 | 2.857  | 1.266  | 60363 | CLDN15    | NM_021719_5_+1  |
| Donson    | 4.167  | 3.978  | 3.580  | 3.945  | 5.092  | 4.961  | 4.722  | 4.612  | 3.435  | 3.616  | 60364 | DONSON    | NM_021720_16_-1 |
| Sap30     | 6.142  | 6.304  | 6.213  | 6.043  | 6.388  | 5.898  | 6.537  | 6.088  | 7.052  | 6.754  | 60406 | SAP30     | NM_021788_8_-1  |
| Trappc4   | 7.586  | 7.556  | 6.905  | 6.833  | 6.369  | 6.425  | 6.195  | 6.292  | 5.850  | 5.662  | 60409 | TRAPP4    | NM_021789_9_-1  |
| Cenpk     | -0.342 | 1.477  | 2.080  | 2.619  | 2.523  | 2.237  | 2.145  | 2.382  | -0.186 | -0.200 | 60411 | CENPK     | NM_021790_13_+1 |
| Doc2g     | 0.470  | 2.084  | 3.066  | 2.457  | 2.421  | 2.708  | 2.072  | 1.335  | 0.217  | -0.159 | 60425 | NA        | NM_021791_19_+1 |
| Ilgp1     | 4.802  | 3.305  | 3.534  | 2.381  | 0.352  | -0.880 | 0.642  | -0.293 | -0.121 | -0.443 | 60440 | NA        | NM_021792_18_+1 |
| Tmem8     | 5.321  | 5.043  | 6.123  | 5.955  | 5.852  | 5.666  | 5.390  | 5.048  | 4.914  | 3.932  | 60455 | TMEM8A    | NM_021793_17_+1 |
| Eed       | 5.915  | 6.402  | 5.826  | 6.070  | 6.591  | 6.839  | 6.438  | 6.317  | 5.714  | 6.186  | 13626 | EED       | NM_021876_7_-1  |
| Hr        | 3.684  | 4.129  | 0.829  | 0.170  | -0.983 | 0.511  | -0.910 | 0.122  | -4.981 | -2.206 | 15460 | HR        | NM_021877_14_+1 |
| Jarid2    | 1.816  | 2.759  | 2.713  | 2.857  | 2.193  | 0.985  | 1.843  | 2.795  | 3.723  | 3.429  | 16468 | JARID2    | NM_021878_13_+1 |
| Oca2      | -4.981 | -4.981 | -4.981 | -4.981 | -4.038 | -4.274 | -4.981 | -4.981 | -4.981 | -4.981 | 18431 | OCA2      | NM_021879_7_+1  |
| Prkar1a   | 8.074  | 8.279  | 8.164  | 8.298  | 8.152  | 8.334  | 8.092  | 8.373  | 8.285  | 8.531  | 19084 | PRKAR1A   | NM_021880_11_+1 |
| Qk        | 3.714  | 4.006  | 3.615  | 3.388  | 4.098  | 3.738  | 3.636  | 3.639  | 4.907  | 5.097  | 19317 | QKI       | NM_021881_17_-1 |
| Pmel      | -4.981 | -2.394 | -0.760 | -0.518 | -0.148 | -0.986 | -0.838 | -1.434 | -0.143 | -1.176 | 20431 | PMEL      | NM_021882_10_+1 |
| Tmod1     | -4.981 | -0.247 | -1.801 | 1.029  | -0.520 | 2.069  | -0.525 | 2.068  | -0.549 | -0.739 | 21916 | TMOD1     | NM_021883_4_+1  |
| Tsg101    | 7.039  | 7.244  | 6.760  | 6.855  | 6.644  | 6.583  | 6.723  | 6.751  | 6.241  | 6.474  | 22088 | TSG101    | NM_021884_7_-1  |
| Cenph     | 1.507  | 1.625  | 2.650  | 2.891  | 3.296  | 2.892  | 2.764  | 2.798  | 0.685  | -0.568 | 26886 | CENPH     | NM_021886_13_-1 |
| Il21r     | 6.451  | 6.478  | 4.784  | 5.131  | 7.388  | 7.222  | 6.441  | 5.915  | 2.318  | 2.220  | 60504 | IL21R     | NM_021887_7_+1  |
| Qtrt1     | 4.627  | 4.530  | 3.742  | 3.435  | 3.047  | 2.890  | 3.116  | 3.000  | 3.294  | 2.784  | 60507 | QTRT1     | NM_021888_9_+1  |
| Syt9      | -4.981 | -4.981 | -4.981 | -4.981 | -4.979 | -4.946 | -4.981 | -4.981 | -4.981 | -2.031 | 60510 | SYT9      | NM_021889_7_+1  |
| Fads3     | 5.987  | 5.995  | -0.441 | -0.120 | -2.585 | -0.565 | -1.417 | 0.788  | -1.435 | -4.981 | 60527 | FADS3     | NM_021890_19_+1 |
| Figl1     | -3.917 | -2.102 | 3.091  | 3.336  | 3.382  | 2.830  | 1.744  | 2.516  | 1.244  | 0.468  | 60530 | FIGL1     | NM_021891_11_-1 |
| Cd274     | 3.760  | 3.140  | 5.141  | 5.211  | 7.540  | 7.634  | 7.071  | 6.695  | 4.568  | 5.050  | 60533 | CD274     | NM_021893_19_+1 |
| Actn4     | 5.260  | 5.465  | 6.207  | 6.341  | 6.327  | 6.239  | 6.502  | 6.700  | 7.261  | 7.160  | 60595 | ACTN4     | NM_021895_7_-1  |
| Gucy1a3   | -2.273 | -4.981 | -3.580 | -1.668 | -2.886 | -2.244 | -4.954 | -2.211 | -2.065 | -4.981 | 60596 | GUCY1A3   | NM_021896_3_-1  |
| Trp53inp1 | 5.370  | 4.834  | 4.636  | 4.500  | 3.946  | 4.094  | 4.379  | 5.239  | 5.214  | 5.459  | 60599 | TP53INP1  | NM_021897_4_+1  |

|          |        |        |        |        |        |        |        |        |        |        |        |          |                 |
|----------|--------|--------|--------|--------|--------|--------|--------|--------|--------|--------|--------|----------|-----------------|
| Foxj2    | 4.415  | 4.540  | 4.475  | 4.130  | 4.141  | 3.864  | 4.513  | 4.614  | 5.885  | 5.790  | 60611  | FOXJ2    | NM_021899_6_+1  |
| Tlx1     | -4.981 | -2.349 | -4.980 | -4.192 | -4.920 | -4.969 | -4.974 | -4.130 | -3.373 | -4.981 | 21908  | TLX1     | NM_021901_19_+1 |
| Tnfrsf18 | -3.130 | -1.395 | -0.862 | -2.017 | -0.911 | -0.684 | -2.956 | -2.098 | -4.584 | -4.981 | 21936  | TNFRSF18 | NM_021985_4_+1  |
| Gnas     | -2.918 | -4.981 | -2.553 | -4.414 | -3.695 | -3.374 | -3.025 | -4.272 | -1.923 | -2.498 | 14683  | GNAS     | NM_022000_2_+1  |
| Fxyd6    | -3.843 | -4.981 | -3.589 | -3.874 | -4.359 | -4.989 | -4.773 | -4.931 | -4.981 | -4.981 | 59095  | FXYD6    | NM_022004_9_+1  |
| Fxyd7    | -4.981 | -4.981 | -4.979 | -3.706 | -4.981 | -4.981 | -2.811 | -2.174 | -3.322 | -3.855 | 57780  | FXYD7    | NM_022007_7_-1  |
| Flii     | 4.655  | 5.207  | 5.952  | 5.936  | 5.966  | 5.959  | 6.275  | 6.265  | 7.210  | 7.125  | 14248  | FLII     | NM_022009_11_-1 |
| Gtf2h2   | 5.186  | 5.649  | 4.415  | 4.795  | 4.679  | 4.917  | 4.320  | 4.430  | 3.937  | 3.547  | 23894  | GTF2H2   | NM_022011_13_-1 |
| Map3k11  | 3.913  | 3.763  | 5.129  | 4.996  | 5.289  | 5.029  | 5.555  | 5.395  | 7.054  | 6.756  | 26403  | MAP3K11  | NM_022012_19_+1 |
| Fn3k     | -4.981 | -2.895 | -4.462 | 0.225  | -3.654 | 1.130  | -3.815 | 0.385  | -4.981 | -1.906 | 63828  | FN3K     | NM_022014_11_+1 |
| Taf8     | 3.543  | 3.617  | 4.111  | 4.046  | 4.459  | 4.393  | 4.456  | 3.960  | 4.956  | 4.594  | 63856  | TAF8     | NM_022015_17_-1 |
| Impg1    | -1.180 | -4.981 | -0.106 | -2.517 | -3.815 | -4.789 | -2.780 | -4.971 | -4.981 | -4.981 | 63859  | IMPG1    | NM_022016_9_-1  |
| Trpv4    | -1.046 | -1.032 | 0.800  | 1.872  | -0.023 | -1.444 | -1.077 | 0.750  | 3.545  | 3.086  | 63873  | TRPV4    | NM_022017_5_-1  |
| Fam129a  | 4.100  | 4.872  | 7.029  | 6.750  | 5.807  | 5.693  | 6.359  | 6.529  | 7.706  | 7.887  | 63913  | FAM129A  | NM_022018_1_+1  |
| Dusp10   | 4.536  | 4.137  | 4.538  | 4.574  | 4.160  | 3.341  | 3.447  | 3.719  | 2.610  | 2.000  | 63953  | DUSP10   | NM_022019_1_+1  |
| Cables1  | 0.604  | 2.196  | -2.442 | -2.348 | -1.929 | -2.042 | -3.095 | -0.729 | 0.550  | -1.128 | 63955  | CABLES1  | NM_022021_18_+1 |
| Ube4b    | 4.260  | 4.152  | 4.594  | 4.403  | 4.652  | 4.476  | 4.481  | 4.238  | 4.991  | 4.805  | 63958  | UBE4B    | NM_022022_4_-1  |
| Gmfb     | 6.273  | 6.106  | 6.690  | 6.638  | 5.763  | 5.796  | 6.201  | 6.334  | 6.736  | 7.006  | 63985  | GMFB     | NM_022023_14_-1 |
| Gmfg     | -0.431 | -4.585 | 1.829  | 2.015  | -1.093 | -3.627 | 1.030  | 0.056  | 0.216  | 0.034  | 63986  | GMFG     | NM_022024_7_+1  |
| Aqp9     | -1.276 | -4.981 | -2.143 | 0.543  | 0.290  | 1.271  | 1.623  | 0.855  | 0.978  | 0.312  | 64008  | AQP9     | NM_022026_9_-1  |
| Syne1    | 1.600  | 1.854  | 0.299  | -0.626 | -0.790 | 0.044  | -0.844 | -1.090 | -1.976 | -3.091 | 64009  | SYNE1    | NM_022027_10_-1 |
| Sav1     | 3.992  | 4.502  | 3.752  | 4.020  | 2.796  | 3.103  | 3.230  | 3.411  | 2.767  | 3.062  | 64010  | SAV1     | NM_022028_12_-1 |
| Nrgn     | 0.058  | -0.065 | 0.028  | 0.572  | 2.383  | 2.226  | 1.400  | 1.565  | 1.344  | 1.730  | 64011  | NA       | NM_022029_9_-1  |
| Sv2a     | -0.066 | 0.236  | -1.781 | -3.015 | -1.714 | -0.948 | -2.500 | -2.690 | -4.981 | -4.981 | 64051  | SV2A     | NM_022030_3_+1  |
| Perp     | -2.948 | -4.981 | -0.827 | 1.007  | -1.579 | -0.086 | 1.075  | -1.124 | -3.022 | -4.981 | 64058  | PERP     | NM_022032_10_+1 |
| Oxct2a   | -4.981 | -4.981 | -4.949 | -4.979 | -3.114 | -1.909 | -3.330 | -4.100 | -4.981 | -4.981 | 64059  | NA       | NM_022033_4_-1  |
| B4galt1  | 5.090  | 5.119  | 4.417  | 4.713  | 5.126  | 5.107  | 5.252  | 5.334  | 6.309  | 6.287  | 14595  | B4GALT1  | NM_022305_4_-1  |
| Cbfb     | 3.842  | 4.497  | 5.346  | 5.001  | 5.035  | 5.187  | 5.177  | 4.638  | 4.875  | 4.989  | 12400  | CBFB     | NM_022309_8_+1  |
| Hspa5    | 7.546  | 7.371  | 7.926  | 8.204  | 7.598  | 7.779  | 7.711  | 8.094  | 7.330  | 7.879  | 14828  | HSPA5    | NM_022310_2_+1  |
| Tcte2    | -4.981 | -4.981 | -2.803 | -2.817 | -1.222 | -1.014 | -1.255 | -3.488 | -4.981 | -4.981 | 21646  | NA       | NM_022311_17_-1 |
| Tnr      | -4.981 | -4.981 | 0.656  | 0.800  | -2.972 | -0.395 | -3.004 | -4.703 | -4.981 | -4.316 | 21960  | TNR      | NM_022312_1_+1  |
| Eral1    | 4.648  | 4.657  | 4.190  | 4.297  | 4.121  | 4.126  | 4.142  | 4.377  | 4.475  | 4.411  | 57837  | ERAL1    | NM_022313_11_-1 |
| Tpm3     | -4.128 | -4.643 | -4.436 | -4.893 | -4.706 | -4.889 | -4.574 | -4.965 | -4.410 | -4.946 | 59069  | TPM3     | NM_022314_3_+1  |
| Smoc2    | -2.178 | -0.904 | -4.940 | -3.461 | -3.894 | -2.630 | -3.272 | -1.465 | -2.605 | -4.981 | 64074  | SMOC2    | NM_022315_17_+1 |
| Smoc1    | -4.981 | -1.692 | -4.965 | -4.965 | -2.844 | -1.485 | -2.337 | -2.408 | -0.833 | -1.795 | 64075  | SMOC1    | NM_022316_12_+1 |
| Slc28a3  | -2.987 | -1.623 | -2.119 | -4.009 | -1.975 | 0.541  | -2.967 | -1.785 | -1.984 | -3.573 | 114304 | SLC28A3  | NM_022317_13_-1 |
| Popdc2   | -4.981 | -4.981 | -3.164 | -2.294 | -3.063 | -3.114 | -1.722 | -2.971 | -2.190 | -2.597 | 64082  | POPDC2   | NM_022318_16_+1 |
| Gpr35    | -4.328 | -4.165 | 4.255  | 3.690  | 2.311  | 2.628  | 1.431  | 2.210  | 3.124  | 3.045  | 64095  | GPR35    | NM_022320_1_+1  |
| Parvg    | 6.316  | 6.431  | 8.021  | 8.311  | 8.417  | 8.578  | 7.826  | 7.402  | 5.810  | 4.856  | 64099  | PARVG    | NM_022321_15_+1 |
| Moap1    | 2.536  | 2.339  | 1.833  | 1.471  | 0.759  | 1.777  | 1.453  | 1.259  | 2.060  | 0.733  | 64113  | MOAP1    | NM_022323_12_-1 |
| Sdf2l1   | 7.372  | 7.598  | 8.047  | 8.527  | 7.339  | 7.931  | 7.325  | 8.109  | 6.184  | 6.989  | 64136  | SDF2L1   | NM_022324_16_-1 |
| Ctsz     | 10.682 | 10.877 | 9.486  | 10.056 | 10.555 | 10.383 | 10.132 | 10.335 | 9.623  | 10.088 | 64138  | CTSZ     | NM_022325_2_-1  |
| Ralb     | 1.713  | 0.292  | 6.455  | 6.704  | 4.897  | 4.967  | 5.982  | 6.463  | 7.551  | 7.644  | 64143  | RALB     | NM_022327_1_-1  |
| Mlt1     | 3.403  | 3.353  | 3.705  | 3.734  | 3.924  | 3.991  | 3.793  | 3.936  | 4.630  | 4.467  | 64144  | MLT1     | NM_022328_17_-1 |
| Tor1aip2 | 4.580  | 4.401  | 6.073  | 5.206  | 4.591  | 4.426  | 4.763  | 4.620  | 4.415  | 4.425  | 240832 | TOR1AIP2 | NM_022329_1_+1  |
| Herpud1  | 10.010 | 10.142 | 9.382  | 9.699  | 9.276  | 9.533  | 8.943  | 9.101  | 7.235  | 8.063  | 64209  | HERPUD1  | NM_022331_8_+1  |
| St7      | -4.899 | -4.880 | -4.966 | -3.886 | -4.950 | -4.641 | -2.824 | -4.069 | -2.847 | -3.071 | 64213  | ST7      | NM_022332_6_+1  |
| Dgcr14   | 4.278  | 4.511  | 4.405  | 4.538  | 4.568  | 4.507  | 4.331  | 4.298  | 4.200  | 4.285  | 27886  | DGCR14   | NM_022408_16_-1 |
| Zfp296   | 3.527  | 4.023  | 3.959  | 4.145  | 4.053  | 4.157  | 4.155  | 4.030  | 3.196  | 2.962  | 63872  | ZNF296   | NM_022409_7_+1  |
| Myh9     | 4.927  | 4.952  | 6.856  | 6.708  | 7.706  | 7.379  | 7.159  | 6.845  | 7.683  | 7.522  | 17886  | MYH9     | NM_022410_15_-1 |
| Slc13a2  | -1.871 | -4.981 | -1.800 | -0.980 | -3.461 | -3.167 | -3.602 | -2.492 | -2.012 | -2.574 | 20500  | SLC13A2  | NM_022411_11_-1 |
| Ptges    | -3.563 | -4.981 | -4.092 | -4.467 | -3.803 | -0.581 | -0.807 | -0.984 | 2.728  | 2.245  | 64292  | PTGES    | NM_022415_2_-1  |
| Iitm2c   | 7.983  | 8.119  | 8.717  | 8.954  | 7.712  | 7.994  | 7.824  | 8.107  | 8.079  | 8.085  | 64294  | ITIM2C   | NM_022417_1_+1  |
| Tmub1    | 4.941  | 4.801  | 4.816  | 4.649  | 4.615  | 4.505  | 4.709  | 4.628  | 4.701  | 4.347  | 64295  | TMUB1    | NM_022418_5_-1  |
| Abhd8    | 2.477  | 2.468  | 1.973  | 2.185  | 2.296  | 2.222  | 1.858  | 2.196  | 2.088  | 2.429  | 64296  | ABHD8    | NM_022419_8_-1  |
| Gprc5b   | -4.981 | -2.523 | -4.271 | -3.046 | -1.930 | -1.946 | -2.413 | -3.055 | -4.981 | -4.981 | 64297  | GPRC5B   | NM_022420_7_-1  |
| Gng13    | -4.981 | -4.981 | -4.546 | -4.972 | -4.922 | -4.922 | -3.892 | -3.408 | -4.981 | -4.981 | 64337  | GNG13    | NM_022422_17_+1 |
| Rnf187   | 9.243  | 7.339  | 7.102  | 6.905  | 7.349  | 6.966  | 7.373  | 7.029  | 7.368  | 6.694  | 108660 | RNF187   | NM_022423_11_-1 |
| Fndc4    | -3.563 | -1.893 | 3.588  | 3.549  | -0.158 | 0.595  | 1.113  | 0.920  | -1.927 | -2.945 | 64339  | FNDC4    | NM_022424_5_-1  |
| Ms4a8a   | 0.582  | -3.408 | -1.290 | -3.157 | -1.470 | -1.048 | 0.248  | 3.167  | 6.363  | 6.491  | 64381  | MS4A8    | NM_022430_19_-1 |
| Sirt2    | 4.519  | 3.643  | 3.872  | 4.181  | 3.582  | 4.215  | 3.643  | 4.126  | 4.414  | 4.232  | 64383  | SIRT2    | NM_022432_7_+1  |
| Sirt3    | -0.168 | 0.182  | 0.553  | -0.317 | -1.885 | -1.417 | -2.294 | -0.696 | -1.655 | -0.034 | 64384  | SIRT3    | NM_022433_7_-1  |
| Cyp4f14  | -4.981 | -4.710 | -4.980 | -4.966 | -4.953 | -4.979 | -4.981 | -4.981 | -4.958 | -4.981 | 64385  | CYP4F12  | NM_022434_17_-1 |
| Pdlim5   | -4.949 | -4.720 | -4.868 | -4.929 | -4.849 | -4.924 | -4.567 | -4.865 | -4.981 | -4.975 | 56376  | PDLM5    | NM_022554_3_-1  |
| Thop1    | 2.671  | 2.510  | 1.946  | 2.385  | 2.079  | 2.213  | 1.915  | 2.477  | 2.038  | 1.858  | 50492  | THOP1    | NM_022653_10_+1 |
| Pidd1    | 0.961  | 1.860  | 1.281  | 1.004  | 2.077  | 1.582  | 1.657  | 1.429  | 2.228  | 1.558  | 57913  | PIDD1    | NM_022654_7_-1  |
| Ireb2    | 4.231  | 4.463  | 4.897  | 4.546  | 4.760  | 4.876  | 4.680  | 4.726  | 5.239  | 5.412  | 64602  | IREB2    | NM_022655_9_+1  |
| Nisch    | 5.962  | 6.350  | 6.203  | 6.241  | 6.690  | 6.712  | 6.297  | 6.200  | 6.441  | 6.134  | 64652  | NA       | NM_022656_14_-1 |
| Fzd5     | -1.451 | -3.330 | -0.804 | -1.916 | -1.725 | -3.032 | -0.905 | -3.267 | -0.999 | -1.803 | 14367  | FZD5     | NM_022721_1_-1  |
| Scube1   | -3.751 | -3.277 | -4.936 | -4.376 | -3.391 | -4.318 | -4.522 | -4.937 | -4.981 | -4.981 | 64706  | SCUBE1   | NM_022723_15_-1 |
| Suv39h2  | 0.478  | 0.442  | 1.024  | 0.758  | 1.141  | 0.707  | -0.371 | 0.222  | -2.278 | 0.152  | 64707  | SUV39H2  | NM_022724_2_-1  |
| Mark3    | 4.796  | 4.823  | 5.867  | 5.502  | 5.604  | 5.148  | 5.419  | 5.401  | 5.998  | 5.815  | 17169  | MARK3    | NM_022801_12_+1 |
| Polr1e   | 4.431  | 4.666  | 5.053  | 5.114  | 4.515  | 4.565  | 4.028  | 4.239  | 3.749  | 3.309  | 64424  | POLR1E   | NM_022811_4_+1  |
| Scamp2   | 7.850  | 7.897  | 7.305  | 7.387  | 7.437  | 7.328  | 7.308  | 7.294  | 7.787  | 7.507  | 24044  | SCAMP2   | NM_022813_9_+1  |

|          |        |        |        |        |        |        |        |        |        |        |        |          |                      |
|----------|--------|--------|--------|--------|--------|--------|--------|--------|--------|--------|--------|----------|----------------------|
| Acot10   | -4.981 | -4.981 | -4.972 | -4.110 | -4.733 | -4.772 | -3.548 | -4.635 | -3.575 | -3.326 | 64833  | ACOT9    | NM_022816_15_-_1     |
| Myl7     | -4.981 | -4.981 | -4.451 | -3.839 | -4.738 | -3.448 | -4.970 | -4.958 | -4.981 | -4.981 | 17898  | MYL7     | NM_022879_11_-_1     |
| Slc29a1  | 1.975  | 1.882  | -1.319 | -1.738 | 0.726  | -0.803 | 0.695  | 1.319  | 0.489  | 1.337  | 63959  | SLC29A1  | NM_022880_17_-_1     |
| Rgs18    | 6.951  | 7.705  | 5.663  | 5.236  | 6.597  | 6.121  | 6.254  | 5.283  | 5.258  | 5.352  | 64214  | RGS18    | NM_022881_1_-_1      |
| Lpin2    | 4.881  | 4.653  | 5.066  | 4.111  | 5.171  | 5.118  | 4.643  | 4.600  | 4.867  | 5.389  | 64898  | LPIN2    | NM_022882_17_+_1     |
| Lpin3    | -4.981 | -4.981 | -4.892 | -4.701 | -4.954 | -4.969 | -4.979 | -4.959 | -4.981 | -4.981 | 64899  | LPIN3    | NM_022883_2_+_1      |
| Bhmt2    | -4.981 | -4.981 | -4.981 | -4.981 | -3.725 | -4.520 | -4.979 | -4.981 | -4.981 | -4.981 | 64918  | BHMT2    | NM_022884_13_-_1     |
| Slc30a5  | 6.399  | 6.869  | 5.923  | 5.833  | 6.075  | 6.219  | 5.907  | 6.014  | 5.766  | 6.163  | 69048  | SLC30A5  | NM_022885_13_-_1     |
| Scel     | -4.981 | -4.981 | -2.838 | -4.963 | 3.579  | 5.483  | 2.219  | 3.206  | 1.951  | 2.967  | 64929  | SCEL     | NM_022886_14_+_1     |
| Tsc1     | 3.222  | 3.276  | 3.220  | 2.725  | 3.311  | 3.122  | 2.706  | 3.142  | 3.590  | 3.447  | 64930  | TSC1     | NM_022887_2_+_1      |
| Izumo1r  | -4.981 | -4.981 | -4.681 | -1.026 | -4.155 | -0.711 | -1.854 | 0.555  | -4.981 | -3.192 | 64931  | IZUMO1R  | NM_022888_9_-_1      |
| Pes1     | 5.864  | 5.719  | 7.008  | 7.178  | 6.427  | 6.515  | 6.378  | 6.529  | 6.523  | 6.246  | 64934  | PES1     | NM_022889_11_+_1     |
| Cldn12   | -3.815 | -3.399 | -2.617 | -2.264 | -1.960 | -2.254 | -2.349 | -0.412 | -3.043 | -0.946 | 64945  | CLDN12   | NM_022890_5_-_1      |
| Rpl23    | 9.091  | 9.076  | 9.270  | 9.170  | 9.119  | 8.988  | 9.465  | 9.189  | 8.025  | 7.793  | 65019  | RPL23    | NM_022891_11_-_1     |
| Lat2     | 6.982  | 6.862  | 5.251  | 5.542  | 6.007  | 6.151  | 6.164  | 6.300  | 5.883  | 5.817  | 56743  | LAT2     | NM_022964_5_-_1      |
| Nup98    | -1.971 | -2.956 | -3.082 | -3.575 | -3.182 | -3.729 | -2.604 | -4.404 | -3.649 | -4.468 | 269966 | NUP98    | NM_022979_7_-_1      |
| Rcan3    | 3.835  | 3.800  | 3.064  | 2.945  | 3.725  | 3.524  | 3.460  | 3.326  | 3.829  | 3.817  | 53902  | RCAN3    | NM_022980_4_-_1      |
| Zfp110   | 5.067  | 4.710  | 4.793  | 4.594  | 5.215  | 5.049  | 5.228  | 4.934  | 5.164  | 5.167  | 65020  | ZNF274   | NM_022981_7_+_1      |
| Rtn4r    | -4.981 | -4.981 | -3.672 | -3.891 | -3.761 | -1.990 | -2.075 | -4.085 | -3.531 | -4.981 | 65079  | RTN4R    | NM_022982_16_+_1     |
| Lpar3    | 0.701  | 3.536  | 2.511  | 3.942  | 3.704  | 4.649  | 2.899  | 2.492  | -3.750 | -1.327 | 65086  | LPAR3    | NM_022983_3_+_1      |
| Zfand6   | 7.743  | 7.898  | 7.243  | 7.313  | 7.303  | 7.429  | 7.122  | 7.088  | 6.664  | 7.164  | 65098  | ZFAND6   | NM_022985_7_-_1      |
| Irak1bp1 | 2.356  | 2.309  | 0.166  | 3.157  | 0.573  | 4.285  | -0.904 | 3.101  | -4.835 | -0.170 | 65099  | IRAK1BP1 | NM_022986_9_+_1      |
| Nif3l1   | 4.379  | 4.474  | 4.091  | 4.297  | 4.524  | 4.455  | 4.305  | 3.972  | 3.647  | 3.362  | 65102  | NIF3L1   | NM_022988_1_+_1      |
| Arl6ip6  | 4.449  | 5.116  | 5.066  | 5.228  | 4.603  | 4.659  | 4.691  | 4.851  | 4.735  | 4.923  | 65103  | ARL6IP6  | NM_022989_2_+_1      |
| Arl6ip5  | 7.152  | 7.011  | 6.341  | 6.617  | 7.598  | 7.573  | 7.348  | 7.500  | 7.391  | 7.648  | 65106  | ARL6IP5  | NM_022992_6_+_1      |
| Lrp10    | 6.352  | 6.374  | 6.922  | 6.863  | 6.973  | 6.922  | 6.914  | 6.993  | 7.950  | 7.595  | 65107  | LRP10    | NM_022993_14_+_1     |
| Dap3     | 5.505  | 5.685  | 5.332  | 5.524  | 5.539  | 5.738  | 5.238  | 5.415  | 4.907  | 5.023  | 65111  | DAP3     | NM_022994_3_-_1      |
| Pmepa1   | 5.052  | 5.377  | 2.615  | 2.790  | -2.686 | -1.435 | -1.197 | 0.895  | -1.368 | -4.342 | 65112  | PMPEA1   | NM_022995_2_-_1      |
| Ndfip1   | 6.890  | 7.011  | 7.234  | 7.057  | 6.370  | 6.647  | 6.541  | 7.028  | 6.259  | 6.321  | 65113  | NDFIP1   | NM_022996_18_+_1     |
| Vps35    | 6.343  | 6.356  | 7.327  | 7.251  | 7.125  | 7.055  | 7.252  | 7.272  | 7.692  | 8.129  | 65114  | VPS35    | NM_022997_8_-_1      |
| Prrg2    | 2.229  | 2.739  | 2.978  | 3.014  | 2.268  | 2.547  | 2.411  | 2.425  | 2.970  | 2.955  | 65116  | PRRG2    | NM_022999_7_-_1      |
| Gfer     | 4.653  | 4.024  | 5.195  | 4.345  | 4.762  | 4.320  | 4.958  | 4.048  | 3.948  | 3.343  | 11692  | GFER     | NM_023040_17_-_1     |
| Pex19    | 5.769  | 5.439  | 5.275  | 4.955  | 5.383  | 5.118  | 5.414  | 5.091  | 5.704  | 5.261  | 19298  | PEX19    | NM_023041_1_+_1      |
| Recql    | 4.411  | 3.815  | 4.343  | 3.343  | 4.508  | 4.018  | 4.426  | 3.758  | 4.549  | 3.284  | 19691  | RECQL    | NM_023042_6_-_1      |
| Prnd     | -4.981 | -4.981 | -4.131 | -2.176 | -4.288 | -3.451 | -4.307 | -4.965 | -4.981 | -4.981 | 26434  | PRND     | NM_023043_2_+_1      |
| Slc15a3  | 4.645  | 4.876  | 1.325  | 1.844  | 3.460  | 3.634  | 4.231  | 4.290  | 4.665  | 4.202  | 65221  | SLC15A3  | NM_023044_19_+_1     |
| Xpo7     | 3.668  | 4.033  | 5.016  | 5.065  | 4.749  | 4.985  | 4.534  | 4.857  | 5.402  | 5.776  | 65246  | XPO7     | NM_023045_14_-_1     |
| Asb1     | 2.355  | 1.324  | 2.445  | 2.335  | 1.755  | 2.492  | 1.801  | 1.518  | 2.349  | 2.022  | 65247  | ASB1     | NM_023046_1_+_1      |
| Asb4     | -4.981 | -4.981 | -4.952 | -4.952 | -2.968 | -4.763 | -4.527 | -4.945 | -3.109 | -4.981 | 65255  | ASB4     | NM_023048_6_+_1      |
| Asb2     | 2.104  | 1.280  | 7.882  | 7.961  | 9.286  | 9.301  | 8.159  | 7.456  | 1.296  | 0.749  | 65256  | ASB2     | NM_023049_12_-_1     |
| Clstn1   | 1.558  | 1.023  | -0.047 | -0.751 | 0.604  | 0.200  | 0.001  | -0.901 | 0.917  | -1.786 | 65945  | CLSTN1   | NM_023051_4_+_1      |
| Ccl21c   | -4.981 | -4.566 | -4.970 | -4.962 | -4.981 | -4.981 | -4.832 | -4.930 | -4.981 | -4.981 | 65956  | CCL21    | NM_023052_4_+_1      |
| Ccl21c   | -4.981 | -4.566 | -4.966 | -4.904 | -4.981 | -4.981 | -4.631 | -4.916 | -4.981 | -4.981 | 65956  | CCL21    | NM_023052_dup1_4_+_2 |
| Ccl21c   | -4.981 | -4.566 | -4.966 | -4.904 | -4.981 | -4.981 | -4.631 | -4.916 | -4.981 | -4.981 | 65956  | CCL21    | NM_023052_dup2_4_+_3 |
| Ccl21c   | -4.981 | -4.566 | -4.970 | -4.962 | -4.981 | -4.981 | -4.832 | -4.930 | -4.981 | -4.981 | 65956  | CCL21    | NM_023052_dup3_4_+_4 |
| Twsg1    | 4.529  | 4.556  | 4.825  | 4.881  | 3.845  | 3.526  | 3.467  | 3.814  | 3.095  | 3.256  | 65960  | TWSG1    | NM_023053_17_-_1     |
| Utp3     | 6.213  | 5.941  | 5.977  | 6.039  | 5.944  | 5.839  | 5.927  | 5.750  | 5.926  | 5.672  | 65961  | UTP3     | NM_023054_5_+_1      |
| Slc9a3r2 | -0.116 | 0.149  | 3.368  | 3.770  | -0.667 | 1.443  | 0.566  | 2.077  | 1.065  | 1.296  | 65962  | SLC9A3R2 | NM_023055_17_-_1     |
| Tmem176b | 0.631  | 0.661  | 4.126  | 4.404  | 6.084  | 6.286  | 6.726  | 6.867  | 4.896  | 6.006  | 65963  | TMEM176B | NM_023056_6_-_1      |
| Zak      | -3.563 | -4.981 | 2.421  | 1.949  | 0.809  | -0.747 | 1.602  | 1.593  | 3.659  | 2.842  | 65964  | ZAK      | NM_023057_2_+_1      |
| Pkmyt1   | 1.583  | 0.212  | 3.665  | 3.294  | 5.109  | 3.970  | 4.242  | 2.883  | 1.663  | 0.309  | 268930 | PKMYT1   | NM_023058_17_+_1     |
| Sigirr   | 4.508  | 4.373  | 4.803  | 4.707  | 4.598  | 4.531  | 4.549  | 4.468  | 3.697  | 3.442  | 24058  | SIGIRR   | NM_023059_7_-_1      |
| Eefsec   | 4.264  | 4.496  | 6.947  | 6.918  | 4.382  | 4.456  | 4.759  | 4.941  | 4.332  | 3.795  | 65967  | EEFSEC   | NM_023060_6_-_1      |
| Mcam     | -3.349 | -4.981 | -2.672 | -4.058 | -3.196 | -1.662 | -4.328 | -3.141 | -2.919 | -3.498 | 84004  | MCAM     | NM_023061_9_+_1      |
| Lima1    | 0.808  | -1.668 | 5.787  | 5.913  | -0.404 | 0.483  | 2.843  | 3.025  | 4.657  | 4.742  | 65970  | LIMA1    | NM_023063_15_-_1     |
| Ifi30    | 9.277  | 8.515  | 9.338  | 9.476  | 10.175 | 10.438 | 10.039 | 9.926  | 8.676  | 8.568  | 65972  | IFI30    | NM_023065_8_-_1      |
| Asph     | 2.311  | 2.054  | 1.441  | 0.314  | -0.488 | -0.958 | 2.008  | 1.366  | 3.800  | 3.445  | 65973  | ASPH     | NM_023066_4_-_1      |
| Aspa     | -1.762 | -1.163 | -2.269 | -2.195 | -1.347 | -1.662 | -1.374 | -1.409 | -4.981 | -4.981 | 11484  | ASPA     | NM_023113_11_-_1     |
| Cacnb2   | 1.993  | 0.456  | 2.698  | 2.110  | -1.354 | -4.384 | 0.517  | -1.837 | -4.624 | -4.981 | 12296  | CACNB2   | NM_023116_2_+_1      |
| Cdc25b   | -3.697 | -3.315 | -1.324 | 1.146  | 0.685  | 1.585  | 0.882  | 1.628  | 0.972  | 1.069  | 12531  | CDC25B   | NM_023117_2_+_1      |
| Dab2     | -4.169 | -4.981 | 1.308  | 1.923  | -2.096 | -1.853 | -0.909 | -0.024 | -1.466 | -2.795 | 13132  | DAB2     | NM_023118_15_+_1     |
| Eno1     | 7.740  | 7.067  | 7.975  | 7.624  | 9.213  | 8.657  | 9.455  | 9.067  | 10.647 | 9.750  | 13806  | ENO1     | NM_023119_4_+_1      |
| Gnb1l    | 2.388  | 2.302  | 1.536  | 1.870  | 1.994  | 1.720  | 1.287  | 1.053  | -1.591 | 0.884  | 13972  | GNB1L    | NM_023120_16_+_1     |
| Gngt2    | 6.043  | 5.874  | 3.443  | 3.054  | 6.023  | 6.289  | 6.472  | 5.475  | 4.782  | 4.431  | 14710  | GNGT2    | NM_023121_11_+_1     |
| Gpm6b    | 0.632  | 1.589  | -1.701 | -2.703 | 2.417  | 2.865  | 0.491  | -1.439 | -4.486 | -4.981 | 14758  | GPM6B    | NM_023122_X_+_1      |
| H2-Q8    | 7.080  | 5.923  | 5.997  | 6.040  | 6.145  | 5.373  | 6.276  | 5.589  | 5.963  | 3.597  | 15019  | NA       | NM_023124_17_+_1     |
| Rab8a    | 7.580  | 7.482  | 8.174  | 8.289  | 8.761  | 8.820  | 8.494  | 8.332  | 8.359  | 8.236  | 17274  | RAB8A    | NM_023126_8_+_1      |
| Polr2k   | 6.612  | 4.047  | 5.786  | 3.450  | 5.456  | 3.503  | 6.054  | 3.263  | 4.917  | 2.728  | 17749  | POLR2K   | NM_023127_15_+_1     |
| Paln     | 3.871  | 3.764  | 4.200  | 2.835  | 2.818  | 2.245  | 3.362  | 3.377  | 6.032  | 5.386  | 18483  | PALM     | NM_023128_10_+_1     |
| Pln      | 0.711  | 1.052  | 1.178  | 0.588  | 0.873  | 0.229  | 0.635  | 0.124  | 2.201  | 2.018  | 18821  | NA       | NM_023129_10_+_1     |
| Raly     | 2.511  | 3.931  | 3.869  | 3.563  | 3.104  | 3.237  | 3.877  | 3.902  | 3.928  | 3.783  | 19383  | RALY     | NM_023130_2_+_1      |
| Rce1     | 5.697  | 5.657  | 4.788  | 4.733  | 4.818  | 4.853  | 4.630  | 4.769  | 4.346  | 4.456  | 19671  | RCE1     | NM_023131_19_-_1     |
| Renbp    | 5.168  | 5.134  | 5.466  | 5.903  | 4.349  | 4.550  | 5.105  | 5.357  | 4.827  | 5.369  | 19703  | RENBP    | NM_023132_X_-_1      |
| Rps19    | 9.771  | 9.218  | 10.577 | 10.006 | 10.816 | 10.049 | 10.909 | 10.053 | 9.208  | 8.565  | 20085  | RPS19    | NM_023133_7_+_1      |

|          |        |        |        |        |        |        |        |        |        |        |        |          |                 |
|----------|--------|--------|--------|--------|--------|--------|--------|--------|--------|--------|--------|----------|-----------------|
| Dtymk    | 4.143  | 4.490  | 3.529  | 3.688  | 4.015  | 4.252  | 3.755  | 3.959  | 2.525  | 2.149  | 21915  | DTYMK    | NM_023136_1_-1  |
| Ubd      | 2.429  | 0.500  | 0.752  | 1.332  | 1.199  | 0.064  | 1.559  | 0.708  | -2.111 | -2.005 | 24108  | UBD      | NM_023137_17_+1 |
| Map2k2   | 6.919  | 6.825  | 6.766  | 6.873  | 6.541  | 6.579  | 6.444  | 6.614  | 6.854  | 6.655  | 26396  | MAP2K2   | NM_023138_10_+1 |
| Glrx3    | 7.738  | 7.934  | 6.956  | 6.955  | 6.237  | 6.363  | 6.423  | 6.340  | 5.777  | 5.764  | 30926  | GLRX3    | NM_023140_7_+1  |
| Tor3a    | 5.826  | 5.733  | 6.580  | 6.679  | 5.732  | 5.502  | 6.041  | 6.159  | 6.871  | 6.487  | 30935  | TOR3A    | NM_023141_1_-1  |
| Arpc1b   | 9.463  | 9.473  | 10.177 | 10.383 | 10.307 | 10.300 | 10.153 | 10.427 | 10.974 | 11.083 | 11867  | ARPC1B   | NM_023142_5_+1  |
| C1ra     | -1.187 | -2.349 | -1.618 | -4.120 | -0.665 | -1.370 | -0.034 | 1.360  | 2.784  | 3.535  | 50909  | C1R      | NM_023143_6_+1  |
| Nono     | 7.365  | 7.451  | 7.918  | 7.916  | 7.668  | 7.559  | 7.399  | 7.575  | 7.505  | 7.580  | 53610  | NONO     | NM_023144_X_+1  |
| Ranbp17  | 2.100  | 0.817  | -1.418 | -1.567 | -2.118 | -0.496 | -3.412 | -2.661 | -4.488 | -2.905 | 66011  | RANBP17  | NM_023146_11_-1 |
| Cndp2    | 6.354  | 6.409  | 6.523  | 6.796  | 6.429  | 6.687  | 6.380  | 6.294  | 6.407  | 6.291  | 66054  | CNDP2    | NM_023149_18_-1 |
| Cwc15    | 7.636  | 7.522  | 7.182  | 7.173  | 7.197  | 7.249  | 7.084  | 6.969  | 6.451  | 6.469  | 66070  | CWC15    | NM_023153_9_+1  |
| Ethe1    | 5.707  | 6.059  | 3.772  | 4.368  | 4.060  | 4.658  | 5.084  | 6.020  | 7.144  | 6.975  | 66071  | ETHE1    | NM_023154_7_+1  |
| Cxcl16   | 2.509  | 0.346  | 8.445  | 8.578  | 6.704  | 6.579  | 7.717  | 7.233  | 2.983  | 4.002  | 66102  | CXCL16   | NM_023158_11_-1 |
| Nat8f1   | 3.271  | 2.930  | 1.835  | 1.663  | 1.826  | 1.667  | 1.894  | 2.033  | 1.768  | 1.908  | 66116  | NAT8B    | NM_023160_6_-1  |
| Znrd1    | 5.976  | 6.059  | 6.303  | 6.254  | 5.869  | 6.119  | 5.744  | 5.682  | 4.518  | 4.542  | 66136  | ZNRD1    | NM_023162_17_-1 |
| Fam89b   | 2.820  | 2.918  | 1.908  | 2.903  | 1.626  | 1.523  | 2.246  | 2.342  | 3.927  | 3.048  | 17826  | FAM89B   | NM_023166_19_-1 |
| Mrpl4    | 6.908  | 6.871  | 6.530  | 6.745  | 6.200  | 6.237  | 6.338  | 6.590  | 6.876  | 6.728  | 66163  | MRPL4    | NM_023167_9_+1  |
| Grina    | 7.225  | 6.016  | 5.810  | 5.992  | 5.392  | 5.982  | 6.186  | 6.149  | 7.045  | 6.527  | 66168  | GRINA    | NM_023168_15_+1 |
| Ndufb9   | 8.274  | 8.159  | 7.592  | 7.609  | 7.535  | 7.586  | 7.684  | 7.611  | 6.893  | 6.699  | 66218  | NDUFB9   | NM_023172_15_+1 |
| Dusp12   | 4.008  | 4.928  | 4.040  | 4.119  | 4.094  | 4.602  | 4.053  | 4.428  | 3.264  | 3.679  | 80915  | DUSP12   | NM_023173_1_-1  |
| Nit2     | 5.611  | 5.433  | 4.432  | 4.720  | 4.187  | 4.292  | 4.214  | 4.187  | 3.505  | 3.319  | 52633  | NIT2     | NM_023175_16_-1 |
| Dmap1    | 5.329  | 5.258  | 4.416  | 4.765  | 5.028  | 5.109  | 4.667  | 4.621  | 4.255  | 4.155  | 66233  | DMAP1    | NM_023178_4_-1  |
| Atp6v1g2 | 2.709  | 1.812  | 2.191  | 2.144  | 1.094  | 1.741  | 1.201  | 1.396  | 1.227  | 1.527  | 66237  | ATP6V1G2 | NM_023179_17_+1 |
| Ctrl     | -4.981 | -1.324 | -0.397 | -1.330 | -1.205 | -2.177 | -2.360 | -2.357 | -2.185 | -1.554 | 109660 | CTRL     | NM_023182_8_-1  |
| Klf15    | -0.227 | -3.267 | -1.395 | -2.960 | -2.758 | -2.197 | -0.901 | -1.452 | -2.194 | -4.981 | 66277  | KLF15    | NM_023184_6_+1  |
| Acin1    | 4.759  | 4.662  | 4.875  | 5.092  | 5.596  | 4.926  | 5.279  | 4.559  | 4.639  | 4.465  | 56215  | ACIN1    | NM_023190_14_-1 |
| Wdr61    | 6.037  | 6.028  | 5.068  | 5.370  | 5.493  | 5.423  | 5.252  | 5.238  | 5.047  | 4.701  | 66317  | WDR61    | NM_023191_9_-1  |
| Pla2g12a | 5.549  | 4.435  | 4.027  | 2.939  | 2.512  | 2.283  | 2.973  | 3.242  | 2.679  | 1.715  | 66350  | PLA2G12A | NM_023196_3_+1  |
| Knop1    | 4.836  | 4.621  | 5.568  | 5.419  | 7.235  | 7.369  | 7.090  | 6.321  | 4.603  | 4.484  | 66356  | KNOP1    | NM_023197_7_-1  |
| Ppp1r7   | 5.828  | 5.841  | 5.451  | 5.632  | 5.612  | 5.656  | 5.366  | 5.397  | 4.691  | 4.679  | 66385  | PPP1R7   | NM_023200_1_+1  |
| Ndufa7   | 7.589  | 7.454  | 6.863  | 6.622  | 6.809  | 6.775  | 7.166  | 6.744  | 6.263  | 5.726  | 66416  | NDUFA7   | NM_023202_17_+1 |
| Dctpp1   | 6.157  | 5.942  | 5.717  | 5.742  | 4.964  | 5.017  | 5.012  | 5.059  | 3.385  | 3.484  | 66422  | DCTPP1   | NM_023203_7_-1  |
| Pbk      | -1.334 | -0.598 | 3.281  | 3.352  | 3.859  | 3.272  | 3.265  | 2.876  | 1.615  | 0.575  | 52033  | PBK      | NM_023209_14_+1 |
| Anp32e   | 7.573  | 7.593  | 7.356  | 7.515  | 7.534  | 7.376  | 7.169  | 7.215  | 5.969  | 6.093  | 66471  | NA       | NM_023210_3_+1  |
| Usmg5    | 7.618  | 7.236  | 8.355  | 8.125  | 7.753  | 7.682  | 7.695  | 7.378  | 6.615  | 6.381  | 66477  | USMG5    | NM_023211_19_-1 |
| Slc30a7  | 5.637  | 5.713  | 6.099  | 5.988  | 5.371  | 5.486  | 5.749  | 6.010  | 6.120  | 6.248  | 66500  | SLC30A7  | NM_023214_3_-1  |
| Chtop    | 5.459  | 5.567  | 5.245  | 4.900  | 5.273  | 5.350  | 5.160  | 5.542  | 5.606  | 5.965  | 66511  | NA       | NM_023215_3_-1  |
| Pgpep1   | 4.087  | 4.214  | 3.587  | 3.623  | 1.843  | 2.355  | 2.767  | 3.008  | 2.784  | 3.099  | 66522  | PGPEP1   | NM_023217_8_-1  |
| Sppl2a   | 5.993  | 6.078  | 7.056  | 7.070  | 6.417  | 6.664  | 6.861  | 7.005  | 7.863  | 8.046  | 66552  | SPPL2A   | NM_023220_2_-1  |
| Cdc20    | 0.688  | 0.791  | 4.535  | 5.375  | 4.807  | 4.545  | 4.360  | 4.272  | 2.856  | 2.543  | 107995 | CDC20    | NM_023223_4_-1  |
| Cblc     | -2.181 | -4.981 | -3.337 | -2.337 | -2.217 | -3.395 | -3.732 | -4.927 | -4.981 | -4.981 | 80794  | CBLC     | NM_023224_7_-1  |
| Fastk    | 5.526  | 5.575  | 5.115  | 5.264  | 5.195  | 5.280  | 4.852  | 5.173  | 5.140  | 4.833  | 66587  | FASTK    | NM_023229_5_-1  |
| Ube2v1   | 7.584  | 7.661  | 7.634  | 7.837  | 7.478  | 7.409  | 7.489  | 7.437  | 7.431  | 7.206  | 66589  | UBE2V1   | NM_023230_2_-1  |
| Stoml2   | 6.451  | 6.294  | 5.966  | 6.270  | 6.032  | 6.063  | 6.094  | 6.198  | 5.814  | 5.594  | 66592  | STOML2   | NM_023231_4_-1  |
| Diablo   | 6.699  | 6.429  | 6.732  | 6.673  | 6.572  | 6.409  | 6.182  | 6.012  | 5.296  | 4.766  | 66593  | DIABLO   | NM_023232_5_-1  |
| Trim13   | 3.213  | 3.228  | 1.668  | 1.946  | 1.890  | 2.095  | 1.570  | 1.665  | 0.931  | 1.681  | 66597  | TRIM13   | NM_023233_14_+1 |
| Ndn12    | 6.100  | 6.113  | 4.804  | 5.099  | 4.857  | 5.086  | 4.560  | 4.659  | 4.629  | 4.581  | 66647  | NSMCE3   | NM_023239_7_-1  |
| Eef1d    | 6.235  | 6.439  | 5.857  | 6.104  | 5.768  | 5.908  | 5.895  | 6.110  | 5.131  | 4.919  | 66656  | EEF1D    | NM_023240_15_-1 |
| Ccnh     | 5.770  | 6.014  | 4.962  | 5.185  | 4.874  | 4.936  | 4.787  | 4.901  | 4.337  | 4.582  | 66671  | CCNH     | NM_023243_13_+1 |
| Ndufaf3  | 6.163  | 6.143  | 4.857  | 5.094  | 5.334  | 5.559  | 5.195  | 4.994  | 4.291  | 4.151  | 66706  | NDUFAF3  | NM_023247_9_-1  |
| Sbds     | 7.088  | 6.951  | 6.295  | 6.247  | 6.290  | 6.426  | 6.269  | 6.207  | 5.765  | 5.653  | 66711  | SBDS     | NM_023248_5_-1  |
| Ypel1    | 0.537  | -0.569 | 0.395  | -3.549 | 0.459  | -0.414 | -0.850 | -1.822 | -0.601 | -1.193 | 106369 | YPEL1    | NM_023249_16_+1 |
| Krt20    | -4.981 | -4.981 | -4.966 | -4.966 | -4.981 | -4.981 | -2.720 | -4.988 | -4.981 | -4.981 | 66809  | KRT20    | NM_023256_11_-1 |
| Pycard   | 8.109  | 8.104  | 6.882  | 7.138  | 7.156  | 7.208  | 7.532  | 8.092  | 7.436  | 7.403  | 66824  | PYCARD   | NM_023258_7_-1  |
| Mrps34   | 7.120  | 6.719  | 6.133  | 6.126  | 5.672  | 5.575  | 5.824  | 5.532  | 4.832  | 4.532  | 79044  | MRPS34   | NM_023260_17_+1 |
| Zfp120   | 2.440  | -4.248 | 2.646  | 0.988  | 3.365  | 1.805  | 3.679  | 2.097  | 3.021  | 3.461  | 104348 | NA       | NM_023266_2_-1  |
| Qsox1    | 3.336  | 4.541  | 3.176  | 4.110  | 1.573  | 2.606  | 2.650  | 4.569  | 3.729  | 5.438  | 104009 | QSOX1    | NM_023268_1_-1  |
| Rnf128   | -4.981 | -4.428 | -3.991 | -3.660 | -4.257 | -2.773 | -1.162 | 0.000  | 1.939  | 3.232  | 66889  | RNF128   | NM_023270_X_+1  |
| Rhoj     | -4.981 | -1.910 | -3.662 | -1.718 | -2.787 | -4.418 | -2.909 | -1.843 | -2.106 | -1.884 | 80837  | RHOJ     | NM_023275_12_+1 |
| Jam3     | -1.581 | -3.267 | -4.152 | -1.949 | -3.613 | -3.542 | -3.088 | -3.106 | -3.351 | -1.971 | 83964  | JAM3     | NM_023277_9_-1  |
| Tubb3    | 1.729  | 1.403  | 0.749  | -2.009 | -0.600 | -4.094 | -0.597 | -1.952 | -0.325 | -4.981 | 22152  | TUBB3    | NM_023279_8_+1  |
| Sdha     | 8.019  | 7.939  | 8.294  | 7.966  | 8.152  | 8.160  | 8.005  | 8.076  | 8.050  | 7.954  | 66945  | SDHA     | NM_023281_13_-1 |
| Nuf2     | 0.443  | 0.066  | 2.753  | 3.349  | 3.612  | 3.009  | 3.144  | 2.261  | 1.401  | 0.891  | 66977  | NUF2     | NM_023284_1_-1  |
| Mkrrn2   | 4.614  | 4.745  | 4.359  | 4.254  | 4.100  | 4.034  | 4.036  | 4.185  | 4.468  | 4.237  | 67027  | MKRRN2   | NM_023290_6_+1  |
| Pus3     | 5.006  | 4.878  | 4.778  | 4.831  | 4.174  | 4.410  | 3.776  | 4.347  | 3.529  | 3.562  | 67049  | PUS3     | NM_023292_9_+1  |
| Ndc80    | 0.361  | 0.932  | 3.063  | 2.744  | 3.885  | 3.239  | 3.583  | 2.368  | 1.730  | 1.021  | 67052  | NDC80    | NM_023294_17_-1 |
| Fgf22    | -3.563 | -4.981 | -4.981 | -4.981 | -4.981 | -4.981 | -4.981 | -4.981 | -4.981 | -4.316 | 67112  | FGF22    | NM_023304_10_+1 |
| Ubpap1   | 5.446  | 5.277  | 6.104  | 6.095  | 5.880  | 5.855  | 5.740  | 5.735  | 6.312  | 6.234  | 67123  | UBAP1    | NM_023305_4_+1  |
| Yipf5    | 6.917  | 6.792  | 5.576  | 5.684  | 5.471  | 5.484  | 5.646  | 5.626  | 5.587  | 5.830  | 67180  | YIPF5    | NM_023311_18_-1 |
| Ndufa13  | 8.326  | 8.265  | 7.919  | 7.977  | 7.831  | 7.938  | 8.125  | 7.894  | 7.134  | 6.959  | 67184  | NDUFA13  | NM_023312_8_-1  |
| Eif4e2   | 4.203  | 4.361  | 4.535  | 4.513  | 4.354  | 3.954  | 4.397  | 4.626  | 5.189  | 4.958  | 26987  | EIF4E2   | NM_023314_1_+1  |
| Nde1     | 5.093  | 5.312  | 5.197  | 5.472  | 5.419  | 5.578  | 5.234  | 5.204  | 4.905  | 5.058  | 67203  | NDE1     | NM_023317_16_+1 |
| Plekho1  | 6.115  | 6.053  | 7.020  | 7.099  | 6.697  | 6.778  | 6.645  | 6.652  | 6.313  | 6.341  | 67220  | PLEKHO1  | NM_023320_3_-1  |
| Zkscan14 | 5.199  | 5.256  | 4.549  | 4.538  | 4.211  | 4.325  | 4.473  | 4.295  | 4.524  | 4.087  | 67235  | ZNF394   | NM_023322_5_-1  |

|               |           |        |        |        |        |        |        |        |        |        |        |        |           |                 |
|---------------|-----------|--------|--------|--------|--------|--------|--------|--------|--------|--------|--------|--------|-----------|-----------------|
|               | Rpf2      | 6.426  | 6.664  | 6.415  | 6.366  | 5.887  | 5.805  | 5.855  | 5.577  | 4.725  | 4.619  | 67239  | RPF2      | NM_023323_10_-1 |
|               | Peli1     | 5.541  | 5.679  | 6.881  | 7.097  | 6.931  | 6.840  | 6.579  | 6.331  | 6.853  | 6.674  | 67245  | PELI1     | NM_023324_11_+1 |
|               | Bmyc      | 8.283  | 8.430  | 5.919  | 5.990  | 6.469  | 6.926  | 6.454  | 6.425  | 4.728  | 4.976  | 107771 | NA        | NM_023326_2_+1  |
|               | Agtppb1   | 2.952  | 3.447  | 3.744  | 3.812  | 3.163  | 3.235  | 3.215  | 3.499  | 3.878  | 3.721  | 67269  | AGTPBP1   | NM_023328_13_-1 |
|               | Mrpl46    | 6.086  | 6.214  | 5.148  | 5.207  | 5.174  | 5.326  | 5.159  | 5.163  | 4.332  | 4.190  | 67308  | MRPL46    | NM_023331_7_-1  |
| 2210010C04Rik | Brd3      | -1.884 | -0.687 | -4.953 | -4.333 | -4.979 | -4.955 | -2.904 | -4.972 | -4.981 | -4.981 | 67373  | NA        | NM_023333_6_-1  |
|               | Coq8a     | 1.398  | 1.557  | 0.020  | -4.162 | -0.644 | -0.319 | -0.086 | -1.017 | 0.507  | 0.562  | 67382  | BRD3      | NM_023336_2_-1  |
|               | Ilkap     | 4.487  | 3.618  | 2.293  | 3.163  | 4.629  | 4.704  | 4.053  | 4.164  | 4.004  | 4.022  | 67426  | COQ8A     | NM_023341_1_-1  |
|               | Snapp29   | 6.367  | 6.493  | 5.717  | 5.836  | 6.116  | 6.110  | 5.863  | 5.880  | 5.530  | 5.442  | 67444  | ILKAP     | NM_023343_1_-1  |
|               | Timm22    | 5.719  | 5.597  | 5.224  | 5.373  | 4.639  | 4.779  | 4.779  | 5.105  | 4.970  | 5.396  | 67474  | SNAP29    | NM_023348_16_+1 |
|               | Zfp788    | 2.363  | 1.215  | 0.720  | 1.152  | 0.937  | 0.352  | 1.040  | 0.630  | -0.221 | 0.575  | 56322  | TIMM22    | NM_023355_11_+1 |
|               | Cdh23     | 3.569  | 4.065  | 3.050  | 3.326  | 3.356  | 4.032  | 2.887  | 3.312  | 2.611  | 3.268  | 67607  | NA        | NM_023363_7_+1  |
|               | Pin1      | -2.349 | -2.264 | -2.315 | -1.852 | -1.250 | -1.998 | -0.879 | -2.027 | -0.690 | -1.563 | 22295  | CDH23     | NM_023370_10_-1 |
|               | Rpl38     | 6.883  | 6.901  | 6.240  | 6.231  | 6.095  | 6.245  | 6.102  | 6.104  | 5.501  | 5.179  | 23988  | PIN1      | NM_023371_9_+1  |
|               | Sdhb      | 7.268  | 7.127  | 7.534  | 7.433  | 7.279  | 7.250  | 7.870  | 7.487  | 6.732  | 6.207  | 67671  | RPL38     | NM_023372_11_+1 |
|               | Sdhb      | 8.698  | 8.988  | 7.998  | 8.355  | 7.772  | 8.029  | 7.766  | 8.284  | 7.873  | 8.268  | 67680  | SDHB      | NM_023374_4_+1  |
|               | Samsn1    | 6.288  | 6.225  | 6.516  | 6.283  | 6.843  | 6.573  | 7.213  | 6.997  | 6.324  | 6.560  | 170460 | STARD5    | NM_023377_7_+1  |
|               | Rtp4      | 8.181  | 8.450  | 7.454  | 7.429  | 7.825  | 7.735  | 7.857  | 7.581  | 8.184  | 8.327  | 67742  | SAMSN1    | NM_023380_16_-1 |
|               | Mdp1      | 2.476  | 0.473  | 1.737  | 0.852  | 7.272  | 5.553  | 7.129  | 5.827  | 6.965  | 5.699  | 67775  | RTP4      | NM_023386_16_+1 |
|               | My112b    | 5.826  | 5.749  | 5.275  | 5.263  | 5.478  | 5.712  | 5.704  | 5.644  | 4.685  | 4.955  | 67881  | MDP1      | NM_023397_14_-1 |
|               | Mesdc2    | 9.897  | 9.767  | 10.506 | 10.417 | 10.359 | 10.386 | 10.105 | 9.901  | 9.675  | 9.350  | 67938  | MYL12A    | NM_023402_17_-1 |
|               | Npc2      | 6.740  | 6.652  | 5.361  | 5.490  | 5.179  | 5.283  | 5.499  | 5.570  | 5.311  | 5.299  | 67943  | MESDC2    | NM_023403_7_+1  |
|               | Pgam1     | 9.502  | 9.601  | 8.902  | 8.893  | 7.047  | 7.008  | 8.367  | 8.686  | 9.658  | 9.460  | 67963  | NPC2      | NM_023409_12_-1 |
|               | Col4a3bp  | 7.445  | 7.269  | 8.278  | 8.302  | 7.109  | 7.141  | 7.560  | 7.614  | 8.592  | 8.083  | 18648  | PGAM1     | NM_023418_19_+1 |
|               | Hist1h2bc | 1.716  | 2.240  | 1.951  | 1.044  | 0.167  | 0.529  | 1.496  | 1.117  | 0.602  | 1.116  | 68018  | COL4A3BP  | NM_023420_13_+1 |
|               | Akirin1   | 4.241  | 3.094  | 4.952  | 3.601  | 5.093  | 3.913  | 4.768  | 2.812  | 3.034  | 1.887  | 68024  | HIST1H2BI | NM_023422_13_+1 |
|               | Ociad1    | 6.777  | 6.961  | 7.045  | 7.084  | 7.287  | 7.384  | 7.014  | 6.881  | 7.069  | 7.120  | 68050  | AKIRIN1   | NM_023423_4_-1  |
|               | Mum1      | 7.856  | 7.970  | 7.276  | 7.328  | 7.239  | 7.363  | 6.984  | 6.992  | 6.489  | 6.384  | 68095  | OCIAD1    | NM_023429_5_+1  |
|               | Tox4      | 4.912  | 5.022  | 4.185  | 4.001  | 4.121  | 4.239  | 4.445  | 4.696  | 5.529  | 5.323  | 68114  | MUM1      | NM_023431_10_+1 |
|               | Tmem86b   | 5.712  | 5.718  | 7.024  | 6.874  | 6.305  | 6.270  | 6.429  | 6.603  | 6.881  | 7.039  | 268741 | TOX4      | NM_023434_14_+1 |
|               | Slc9a3r2  | 1.156  | 1.611  | 0.459  | 1.222  | 1.119  | 1.907  | 0.587  | 1.320  | 0.844  | 1.624  | 68255  | TMEM86B   | NM_023440_7_-1  |
|               | Npy       | -4.064 | -0.955 | -2.474 | -1.495 | -3.436 | -2.397 | -0.644 | -2.428 | -2.014 | -4.622 | 65962  | SLC9A3R2  | NM_023449_17_-1 |
|               | Ly6g6c    | -4.981 | -0.615 | -4.578 | -0.083 | -4.961 | -1.877 | -4.919 | -1.592 | -4.981 | -0.303 | 109648 | NPY       | NM_023456_6_+1  |
|               | Ssna1     | -3.843 | -4.981 | -4.981 | -3.338 | -3.569 | -3.257 | -3.771 | -4.305 | -1.682 | -3.527 | 68468  | LY6G6C    | NM_023463_17_+1 |
|               | Ctnnbip1  | 6.336  | 6.340  | 5.375  | 5.648  | 5.673  | 5.603  | 5.863  | 5.897  | 5.506  | 5.296  | 68475  | SSNA1     | NM_023464_2_-1  |
|               | Ankra2    | 3.189  | 4.102  | 4.389  | 5.072  | 2.775  | 3.559  | 3.177  | 4.168  | 4.338  | 4.742  | 67087  | CTNNBIP1  | NM_023465_4_+1  |
|               | Serhl2    | 4.479  | 4.279  | 3.638  | 3.490  | 3.941  | 3.972  | 3.857  | 3.498  | 3.209  | 3.409  | 68558  | ANKRA2    | NM_023472_13_+1 |
|               | Tinagl1   | 6.079  | 5.981  | 4.796  | 4.720  | 5.017  | 5.123  | 4.596  | 4.285  | 4.193  | 3.992  | 68607  | SERHL2    | NM_023475_15_+1 |
|               | Upk3a     | -4.703 | -4.063 | -4.909 | -4.871 | -4.884 | -4.966 | -4.976 | -4.961 | -4.603 | -4.872 | 94242  | TINAGL1   | NM_023476_4_-1  |
|               | Elac2     | -4.981 | -4.981 | -4.981 | -4.981 | -4.931 | -4.931 | -4.928 | -2.034 | -4.981 | -4.981 | 22270  | UPK3A     | NM_023478_15_+1 |
|               | Fahd1     | 3.720  | 3.771  | 5.320  | 5.585  | 3.784  | 3.996  | 3.472  | 4.092  | 4.308  | 4.071  | 68626  | ELAC2     | NM_023479_11_+1 |
| 1110032A03Rik | Sync      | 3.429  | 3.444  | 2.955  | 2.538  | 2.069  | 2.373  | 2.166  | 2.268  | 2.159  | 2.425  | 68636  | FAHD1     | NM_023480_17_-1 |
|               | Xk        | 6.008  | 5.377  | 3.551  | 3.361  | 3.398  | 3.148  | 3.851  | 3.072  | 3.365  | 2.799  | 68721  | C11orf1   | NM_023483_9_-1  |
|               | Elf2      | -4.981 | -4.981 | -4.521 | -3.295 | -4.971 | -4.971 | -4.981 | -4.981 | -4.981 | -4.981 | 68828  | SYNC      | NM_023485_4_+1  |
|               | Ing2      | -0.346 | -1.314 | 0.805  | 1.052  | -0.260 | 1.157  | 1.245  | 2.084  | 0.800  | 1.689  | 22439  | XK        | NM_023500_X_+1  |
|               | Glrx2     | 2.271  | 1.883  | 2.725  | 2.898  | 3.249  | 2.346  | 2.975  | 2.975  | 3.038  | 3.355  | 69257  | ELF2      | NM_023502_3_-1  |
|               | Ercc6l2   | 4.965  | 4.992  | 3.705  | 3.710  | 3.983  | 4.087  | 4.329  | 4.185  | 4.141  | 4.040  | 69260  | ING2      | NM_023503_8_-1  |
|               | Mrops9    | 3.517  | -1.021 | 3.264  | 1.344  | 3.075  | 0.714  | 3.324  | 0.075  | 3.111  | -0.460 | 69367  | GLRX2     | NM_023505_1_+1  |
|               | Hilpda    | -4.707 | -1.812 | 0.511  | -1.148 | -1.130 | -0.953 | -1.183 | -2.319 | -0.531 | 0.540  | 76251  | ERCC6L2   | NM_023507_13_+1 |
|               | Tnfsf13   | 5.370  | 5.600  | 5.098  | 5.300  | 4.911  | 4.923  | 4.833  | 4.960  | 4.687  | 4.591  | 69527  | MRPS9     | NM_023514_1_+1  |
|               | Pecr      | 4.818  | 3.896  | 2.656  | 2.879  | 4.816  | 4.664  | 4.593  | 4.669  | 3.150  | 2.838  | 69573  | HILPDA    | NM_023516_6_+1  |
|               | Tfpt      | 1.298  | -3.750 | 0.115  | 1.260  | 0.572  | 0.712  | 3.556  | 4.937  | 5.115  | 6.159  | 69583  | TNFSF13   | NM_023517_11_-1 |
|               | Cad       | 3.329  | 3.342  | 0.281  | 2.141  | 2.154  | 2.245  | 2.077  | 2.445  | 1.406  | 1.220  | 111175 | PECR      | NM_023523_1_-1  |
|               | Nkiras1   | 3.684  | 3.898  | 3.261  | 3.040  | 3.389  | 3.570  | 3.195  | 3.025  | 2.768  | 2.675  | 69714  | TFPT      | NM_023524_7_-1  |
|               | Ms4a10    | 2.391  | 2.113  | 3.216  | 3.765  | 3.426  | 3.470  | 3.513  | 4.090  | 3.225  | 2.818  | 69719  | CAD       | NM_023525_5_+1  |
|               | Mrto4     | 4.268  | 4.803  | 2.926  | 2.989  | 3.983  | 4.082  | 3.443  | 3.227  | 2.121  | 2.338  | 69721  | NKIRAS1   | NM_023526_14_+1 |
|               | Rab3b     | -4.981 | -4.981 | 0.145  | -0.817 | -4.426 | -4.937 | -4.981 | -4.744 | -4.981 | -4.981 | 69826  | MS4A10    | NM_023529_19_-1 |
|               | Agk       | -2.420 | -2.498 | -1.528 | -1.138 | -3.077 | -1.922 | -2.457 | -2.762 | -4.877 | -4.974 | 69902  | MRT04     | NM_023536_4_-1  |
|               | Chn2      | -4.981 | -4.981 | -4.923 | -4.210 | -3.318 | -4.828 | -4.885 | -2.089 | -4.394 | -4.981 | 69908  | RAB3B     | NM_023537_4_+1  |
|               | Rsc1a1    | 3.709  | 3.863  | 3.218  | 3.442  | 3.887  | 3.858  | 3.363  | 3.622  | 3.109  | 3.121  | 69923  | AGK       | NM_023538_6_+1  |
|               | Ino80b    | -2.015 | -1.380 | -2.325 | -3.441 | -4.588 | -1.858 | -4.958 | -3.619 | -4.981 | -4.972 | 69993  | CHN2      | NM_023543_6_+1  |
|               | Nol7      | 3.868  | 3.990  | 2.545  | 2.664  | 3.139  | 4.152  | 3.274  | 2.779  | 2.761  | 2.889  | 69994  | RSC1A1    | NM_023544_4_-1  |
|               | Mvk       | 4.694  | 4.744  | 4.084  | 4.044  | 3.940  | 4.265  | 4.211  | 4.183  | 4.380  | 4.212  | 70020  | INO80B    | NM_023547_6_-1  |
|               | Slc44a4   | 7.592  | 7.409  | 6.540  | 6.599  | 7.284  | 7.301  | 7.029  | 6.656  | 5.126  | 5.029  | 70078  | NOL7      | NM_023554_13_+1 |
|               | Plscr3    | 4.235  | 4.003  | 2.391  | 2.229  | 1.970  | 2.576  | 2.174  | 2.337  | 1.511  | 2.125  | 17855  | MVK       | NM_023556_5_+1  |
|               | Cse1l     | -1.632 | -4.981 | -4.943 | -4.576 | -4.946 | -3.828 | -4.952 | -4.934 | -3.925 | -4.981 | 70129  | SLC44A4   | NM_023557_17_+1 |
|               | Muc2      | 2.243  | 2.874  | 4.318  | 4.778  | 3.182  | 3.462  | 4.169  | 4.973  | 5.362  | 6.163  | 70310  | PLSCR3    | NM_023564_11_+1 |
|               | Ipo5      | 5.091  | 5.097  | 5.621  | 5.801  | 5.543  | 5.620  | 5.645  | 5.762  | 5.907  | 6.018  | 110750 | CSE1L     | NM_023565_2_+1  |
|               | Epha1     | -4.981 | -4.981 | -4.981 | -4.981 | -4.981 | -4.981 | -4.981 | -4.981 | -1.389 | -1.376 | 17831  | MUC2      | NM_023566_7_+1  |
|               | Ube2v2    | 4.335  | 4.513  | 5.685  | 5.677  | 5.246  | 5.031  | 5.168  | 5.335  | 5.050  | 5.053  | 70572  | IPO5      | NM_023579_14_+1 |
|               | Hacd2     | -0.530 | 0.592  | -2.056 | -2.358 | -1.914 | -1.118 | -1.621 | -1.353 | -0.467 | -1.170 | 13835  | EPHA1     | NM_023580_6_-1  |
|               | Dut       | 6.283  | 6.428  | 6.030  | 6.184  | 5.991  | 5.994  | 6.090  | 6.058  | 4.971  | 5.750  | 70620  | UBE2V2    | NM_023585_16_-1 |
|               |           | 5.715  | 5.845  | 6.632  | 6.743  | 5.173  | 5.211  | 5.273  | 5.466  | 4.672  | 4.546  | 70757  | HACD2     | NM_023587_16_+1 |
|               |           | 2.342  | 2.175  | 3.568  | 3.893  | 4.744  | 4.437  | 3.352  | 3.898  | 1.136  | 0.519  | 110074 | DUT       | NM_023595_2_+1  |

|               |        |        |        |        |        |        |        |        |        |        |        |           |                 |
|---------------|--------|--------|--------|--------|--------|--------|--------|--------|--------|--------|--------|-----------|-----------------|
| Slc29a3       | 7.148  | 7.160  | 5.702  | 5.823  | 5.713  | 5.163  | 6.396  | 6.350  | 6.637  | 6.660  | 71279  | SLC29A3   | NM_023596_10_-1 |
| Wdr31         | -2.361 | -0.219 | -4.352 | -3.958 | -3.974 | -3.695 | -4.658 | -4.957 | -4.981 | -4.981 | 71354  | WDR31     | NM_023597_4_-1  |
| Arid5b        | 4.911  | 4.645  | 2.965  | 3.238  | 5.301  | 5.247  | 5.067  | 4.820  | 4.229  | 4.252  | 71371  | ARID5B    | NM_023598_10_-1 |
| Sfpq          | 5.510  | 5.541  | 5.860  | 5.850  | 5.783  | 5.778  | 5.629  | 5.514  | 4.540  | 5.248  | 71514  | SFPQ      | NM_023603_4_+1  |
| Fbxo9         | 5.251  | 5.049  | 4.100  | 4.393  | 4.226  | 4.328  | 4.155  | 4.418  | 4.784  | 4.860  | 71538  | FBXO9     | NM_023605_9_-1  |
| Gdpd2         | -4.981 | -4.622 | -4.978 | -4.975 | -4.949 | -4.239 | -4.804 | -4.946 | -2.022 | -4.858 | 71584  | GDPD2     | NM_023608_X_+1  |
| Esm1          | -4.981 | -4.981 | -4.754 | -2.428 | -4.967 | -4.187 | -4.117 | -1.719 | -4.981 | -3.480 | 71690  | ESM1      | NM_023612_13_+1 |
| Aox3          | -4.981 | -4.981 | -0.753 | -0.866 | -4.981 | -4.981 | -2.823 | -3.022 | 0.699  | 1.088  | 71724  | NA        | NM_023617_1_+1  |
| Rgl3          | -1.369 | -4.981 | -3.310 | -3.882 | -3.409 | -3.720 | -2.488 | -3.933 | -2.936 | -4.981 | 71746  | RGL3      | NM_023622_9_-1  |
| Plbd2         | 6.663  | 6.554  | 5.980  | 6.304  | 5.707  | 5.814  | 6.269  | 6.226  | 6.386  | 6.074  | 71772  | PLBD2     | NM_023625_5_-1  |
| Ing3          | 5.356  | 5.515  | 4.317  | 4.269  | 4.519  | 4.505  | 4.607  | 4.656  | 5.115  | 5.323  | 71777  | ING3      | NM_023626_6_+1  |
| Isyna1        | 5.311  | 4.969  | 6.348  | 6.511  | 5.569  | 5.851  | 5.779  | 6.007  | 5.250  | 5.050  | 71780  | ISYNA1    | NM_023627_8_+1  |
| Anxa9         | 2.370  | 1.867  | -0.297 | -0.640 | -0.045 | -0.162 | -0.904 | -1.106 | 1.200  | 0.442  | 71790  | ANXA9     | NM_023628_3_-1  |
| Gtf2a1l       | -0.386 | -4.981 | -4.981 | -4.981 | -4.975 | -4.975 | -4.981 | -4.981 | -4.981 | -4.981 | 71828  | GTF2A1L   | NM_023630_17_+1 |
| Aox4          | -3.668 | -3.267 | -2.380 | -3.143 | -4.977 | -3.290 | -4.819 | -3.500 | -4.981 | -4.981 | 71872  | NA        | NM_023631_1_+1  |
| 2410016006Rik | 3.045  | 2.393  | 4.121  | 4.551  | 2.641  | 2.659  | 3.128  | 3.609  | 4.498  | 4.114  | 71952  | C14orf169 | NM_023633_12_+1 |
|               | 3.847  | 3.639  | 3.355  | 3.151  | 2.949  | 3.205  | 3.765  | 3.688  | 5.368  | 5.400  | 11891  | RAB27A    | NM_023635_9_+1  |
| Sars2         | 3.743  | 3.701  | 3.975  | 4.063  | 4.106  | 3.891  | 3.739  | 3.489  | 3.736  | 3.695  | 71984  | SARS2     | NM_023637_7_+1  |
| Porcn         | -4.418 | -4.062 | -3.436 | -2.486 | -4.673 | -4.948 | -4.190 | -4.871 | -4.056 | -4.937 | 53627  | PORCN     | NM_023638_X_-1  |
| Mccc1         | 3.794  | 4.357  | 3.598  | 3.987  | 3.742  | 3.921  | 3.210  | 3.509  | 3.262  | 3.615  | 72039  | MCCC1     | NM_023644_3_-1  |
| Kdelc1        | 4.607  | 4.574  | 4.252  | 4.255  | 3.676  | 3.548  | 3.791  | 3.993  | 3.275  | 3.866  | 72050  | KDEL1     | NM_023645_1_-1  |
| Dnaja3        | 2.624  | 2.950  | 3.110  | 3.071  | 2.844  | 2.511  | 2.937  | 2.991  | 2.867  | 3.292  | 83945  | DNAJA3    | NM_023646_16_+1 |
| Nipa2         | 4.395  | 3.907  | 4.347  | 4.377  | 4.949  | 4.432  | 4.257  | 3.771  | 3.590  | 3.193  | 93790  | NIPA2     | NM_023647_7_-1  |
| Ush1c         | -4.981 | -4.981 | -4.971 | -3.634 | -3.069 | 1.354  | -4.946 | -1.976 | -4.981 | -4.981 | 72088  | USH1C     | NM_023649_7_-1  |
| Pex13         | 5.219  | 5.118  | 5.343  | 5.388  | 5.229  | 5.084  | 5.190  | 4.977  | 4.970  | 5.211  | 72129  | PEX13     | NM_023651_11_-1 |
| Pcm1          | 5.338  | 4.705  | 4.637  | 4.563  | 5.218  | 5.294  | 4.410  | 4.099  | 3.719  | 3.784  | 18536  | PCM1      | NM_023662_8_+1  |
| Ripk4         | -2.948 | -0.710 | -4.898 | -1.618 | -4.896 | -1.988 | -4.920 | -3.910 | -4.981 | -4.981 | 72388  | RIPK4     | NM_023663_16_-1 |
| Rsrp1         | 8.540  | 8.355  | 8.934  | 8.579  | 9.095  | 9.009  | 9.007  | 8.984  | 9.215  | 9.503  | 27981  | NA        | NM_023665_4_+1  |
| Ndel1         | 6.129  | 6.270  | 6.683  | 6.500  | 6.212  | 6.255  | 6.193  | 6.410  | 6.957  | 6.876  | 83431  | NDEL1     | NM_023668_11_-1 |
| Igf2bp3       | -1.084 | -1.101 | -1.745 | -2.737 | -0.299 | -2.716 | 0.000  | -1.349 | 1.660  | -0.874 | 140488 | IGF2BP3   | NM_023670_6_-1  |
| Clns1a        | 7.324  | 7.274  | 6.911  | 6.879  | 6.870  | 6.872  | 6.696  | 6.696  | 6.224  | 6.013  | 12729  | CLNS1A    | NM_023671_7_+1  |
| Ssbp3         | 1.510  | 1.731  | -0.772 | 0.970  | -0.590 | -0.852 | -0.714 | -1.055 | -0.558 | -0.233 | 72475  | SSBP3     | NM_023672_4_+1  |
| Tnfrsf22      | 0.729  | 0.951  | 1.387  | 1.508  | 0.249  | -0.665 | 1.013  | 1.155  | -0.085 | 0.590  | 79202  | NA        | NM_023680_7_-1  |
| Lime1         | 3.098  | 3.263  | 3.586  | 3.743  | 4.474  | 4.750  | 3.531  | 4.498  | 3.267  | 3.049  | 72699  | LIME1     | NM_023684_2_+1  |
| Zkscan3       | 4.122  | 4.840  | 4.143  | 4.087  | 4.066  | 4.501  | 3.876  | 3.641  | 3.619  | 4.717  | 72739  | ZKSCAN3   | NM_023685_13_-1 |
| Crybb1        | -4.981 | -4.981 | -4.981 | -4.981 | -4.958 | -4.080 | -3.968 | -2.781 | 2.470  | 0.787  | 12960  | CRYBB1    | NM_023695_5_+1  |
| Rdh14         | 5.800  | 5.791  | 4.394  | 4.374  | 4.497  | 4.574  | 4.471  | 4.345  | 3.864  | 4.259  | 105014 | RDH14     | NM_023697_12_+1 |
| Capn9         | -0.491 | -1.905 | -4.981 | -4.981 | -4.964 | -4.191 | -3.298 | -3.498 | -2.358 | -2.943 | 73647  | CAPN9     | NM_023709_8_+1  |
| Spns1         | 4.831  | 5.132  | 4.102  | 4.286  | 4.366  | 4.466  | 4.308  | 4.678  | 4.997  | 4.931  | 73658  | SPNS1     | NM_023712_7_-1  |
| Tubb2b        | 4.985  | 5.186  | 3.916  | 4.179  | 0.653  | 1.013  | -0.161 | 0.454  | -3.160 | -2.444 | 73710  | TUBB2B    | NM_023716_13_-1 |
| Txnip         | 6.905  | 7.081  | 5.811  | 5.781  | 6.871  | 6.740  | 7.039  | 6.998  | 7.945  | 7.658  | 56338  | TXNIP     | NM_023719_3_+1  |
| Atp6v1d       | 8.759  | 7.574  | 7.515  | 7.413  | 7.146  | 6.907  | 6.858  | 6.079  | 6.286  | 5.515  | 73834  | ATP6V1D   | NM_023721_12_-1 |
| Rd3           | -0.670 | -3.106 | -4.204 | -3.579 | -4.870 | -4.846 | -4.103 | -4.276 | -1.641 | -2.466 | 74023  | RD3       | NM_023727_1_+1  |
| Ccdc86        | 4.550  | 4.748  | 6.106  | 5.941  | 4.841  | 4.742  | 4.918  | 4.789  | 5.040  | 4.040  | 108673 | CCDC86    | NM_023731_19_-1 |
| Abcb6         | 0.690  | 0.267  | 0.896  | 2.278  | 1.293  | 2.089  | 0.720  | 2.491  | 1.676  | 2.197  | 74104  | ABCB6     | NM_023732_1_-1  |
| Crot          | 5.837  | 5.460  | 5.462  | 5.791  | 5.183  | 5.296  | 5.311  | 5.287  | 5.724  | 5.864  | 74114  | CROT      | NM_023733_5_-1  |
| Pi16          | 0.175  | 0.574  | 0.372  | 0.003  | -2.855 | -1.147 | 2.019  | 2.251  | 7.131  | 6.983  | 74116  | PI16      | NM_023734_17_+1 |
| Actr3         | 4.176  | 3.954  | 5.862  | 6.054  | 5.789  | 5.706  | 5.474  | 5.423  | 5.531  | 5.816  | 74117  | ACTR3     | NM_023735_1_-1  |
| Ehhadh        | 2.672  | 2.435  | 2.196  | 2.705  | 1.165  | 2.317  | 0.897  | 1.084  | 1.060  | 1.217  | 74147  | EHHADH    | NM_023737_16_-1 |
| Uba7          | 5.824  | 5.908  | 6.231  | 6.351  | 6.973  | 6.910  | 6.432  | 6.131  | 6.547  | 6.317  | 74153  | UBA7      | NM_023738_9_+1  |
| Nfx1          | 3.863  | 4.167  | 4.670  | 4.634  | 5.095  | 5.195  | 4.676  | 4.648  | 4.803  | 4.588  | 74164  | NFX1      | NM_023739_4_+1  |
| Zdhhc16       | 4.592  | 4.621  | 4.684  | 4.828  | 4.380  | 4.445  | 4.424  | 4.533  | 4.996  | 4.802  | 74168  | ZDHHC16   | NM_023740_19_+1 |
| Dtx2          | 0.440  | -3.259 | -3.926 | -1.777 | -4.625 | -4.839 | -4.256 | -1.292 | -4.057 | -4.496 | 74198  | DTX2      | NM_023742_5_+1  |
| Eif4enif1     | 3.539  | -0.572 | 3.488  | 3.742  | 3.011  | 3.113  | 2.356  | 2.933  | 3.152  | 2.948  | 74203  | EIF4ENIF1 | NM_023743_11_+1 |
| Zfp84         | 3.734  | 3.384  | 5.047  | 5.188  | 4.304  | 4.684  | 4.247  | 4.644  | 4.549  | 5.008  | 74352  | ZNF565    | NM_023750_7_+1  |
| Tfcp2l1       | -4.981 | -2.137 | -4.689 | -3.982 | -4.958 | -4.502 | -4.926 | -4.953 | -4.981 | -4.981 | 81879  | TFCP2L1   | NM_023755_1_+1  |
| Tollip        | 5.125  | 5.153  | 5.427  | 5.445  | 5.367  | 5.358  | 5.431  | 5.624  | 6.835  | 6.698  | 54473  | TOLLIP    | NM_023764_7_-1  |
| Mphosph8      | 5.080  | 5.270  | 4.601  | 4.728  | 5.032  | 5.135  | 5.175  | 4.832  | 3.662  | 4.023  | 75339  | MPHOSPH8  | NM_023773_14_+1 |
| 1700020D05Rik | -2.099 | -0.674 | -3.761 | -3.703 | -2.605 | -3.676 | -2.375 | -3.299 | -1.670 | -3.142 | 75555  | NA        | NM_023781_19_-1 |
|               | 2.471  | 1.496  | 1.131  | 2.533  | 1.327  | 1.670  | 2.184  | 2.109  | 2.943  | 3.113  | 57349  | NA        | NM_023785_5_+1  |
| Mageh1        | -3.090 | -0.170 | -1.219 | 0.667  | -0.504 | 0.738  | -0.945 | 0.126  | -4.981 | 0.189  | 75625  | MAGEH1    | NM_023788_X_-1  |
| Wdr54         | -4.981 | -4.981 | -1.217 | -0.322 | 0.685  | 1.044  | 0.453  | -0.927 | -2.521 | -1.139 | 75659  | WDR54     | NM_023790_6_-1  |
| Pank1         | 3.116  | 2.284  | 0.866  | 1.253  | 0.170  | -2.499 | 0.148  | -1.178 | -4.834 | -0.330 | 75735  | PANK1     | NM_023792_19_-1 |
| Etv5          | 2.335  | 2.852  | 0.712  | 1.763  | 3.047  | 3.741  | 4.186  | 4.061  | 2.054  | 1.449  | 104156 | ETV5      | NM_023794_16_-1 |
| Mgea5         | 6.134  | 5.904  | 6.818  | 6.462  | 6.862  | 6.627  | 6.491  | 6.306  | 7.120  | 6.988  | 76055  | MGEA5     | NM_023799_19_-1 |
| Camk2d        | 3.157  | 2.430  | 2.618  | 2.255  | 4.005  | 3.944  | 3.656  | 4.039  | 4.944  | 4.979  | 108058 | CAMK2D    | NM_023813_3_+1  |
| Trp53rkb      | 2.913  | 2.825  | 1.975  | 1.979  | 2.102  | 1.826  | 1.484  | 1.788  | 1.320  | 1.634  | 76367  | TP53RKB   | NM_023815_2_+1  |
| Cmya5         | 3.475  | 3.399  | -2.695 | -2.966 | 1.848  | 2.221  | -0.121 | -0.444 | 0.295  | -0.743 | 76469  | NA        | NM_023821_13_-1 |
| Paqr4         | -2.097 | -1.152 | 3.151  | 3.430  | 2.479  | 2.341  | 2.041  | 2.430  | 0.670  | 0.598  | 76498  | PAQR4     | NM_023824_17_-1 |
| Ift46         | 4.565  | 4.909  | 4.062  | 4.475  | 4.020  | 4.234  | 3.892  | 4.234  | 3.706  | 4.365  | 76568  | IFT46     | NM_023831_9_+1  |
| Trim12a       | 6.464  | -1.605 | 5.851  | -1.671 | 6.568  | -1.238 | 5.892  | -2.136 | 4.734  | -1.836 | 76681  | NA        | NM_023835_7_-1  |
| Jam2          | -4.981 | -1.459 | -3.294 | -2.503 | -3.556 | -4.220 | -4.940 | -4.904 | -4.981 | -4.981 | 67374  | JAM2      | NM_023844_16_+1 |
| Chst1         | -4.981 | -4.981 | -4.498 | -1.906 | -3.089 | -2.271 | -3.132 | -1.208 | 2.101  | 1.404  | 76969  | CHST1     | NM_023850_2_+1  |
| Arfgap2       | 5.915  | 5.982  | 6.257  | 6.342  | 6.385  | 6.335  | 6.131  | 6.183  | 6.373  | 6.205  | 77038  | ARFGAP2   | NM_023854_2_+1  |

|              |        |        |        |        |        |        |        |        |        |        |        |                 |                 |
|--------------|--------|--------|--------|--------|--------|--------|--------|--------|--------|--------|--------|-----------------|-----------------|
| Mttr2        | 3.830  | 4.314  | 4.607  | 4.695  | 3.833  | 3.952  | 3.767  | 4.219  | 4.582  | 4.737  | 77116  | MTMR2           | NM_023858_9_+1  |
| Ryr2         | -4.981 | -4.981 | -4.898 | -1.925 | -4.998 | -2.652 | -4.967 | -3.734 | -4.981 | -2.969 | 20191  | RYR2            | NM_023868_13_-1 |
| Set          | 6.851  | 6.612  | 6.876  | 6.974  | 7.496  | 7.590  | 7.136  | 7.020  | 4.685  | 4.955  | 56086  | SET             | NM_023871_2_+1  |
| Kcnq5        | -4.981 | -3.459 | -3.800 | -4.944 | -4.601 | -3.403 | -2.275 | -3.177 | -4.981 | -4.981 | 226922 | KCNQ5           | NM_023872_1_-1  |
| Cep70        | 3.814  | 3.715  | 4.772  | 3.961  | 4.568  | 3.729  | 4.233  | 3.463  | 3.175  | 3.331  | 68121  | CEP70           | NM_023873_9_+1  |
| Elp4         | 4.309  | 4.107  | 3.569  | 3.730  | 3.466  | 3.378  | 2.988  | 3.147  | 2.425  | 2.519  | 77766  | ELP4            | NM_023876_2_-1  |
| Cldn10       | -4.981 | -4.981 | -4.981 | -4.981 | -4.981 | -4.981 | -4.981 | -4.981 | -4.981 | -4.981 | 58187  | CLDN10          | NM_023878_14_+1 |
| Rpgrip1      | 5.931  | 2.900  | 0.613  | -1.856 | -0.812 | -3.589 | -2.797 | -1.779 | -2.338 | -4.946 | 77945  | RPGRIP1         | NM_023879_14_+1 |
| Ralgps2      | -4.279 | -4.329 | -4.739 | -2.987 | -4.686 | -3.866 | -3.193 | -2.517 | -0.088 | -4.747 | 78255  | RALGPS2         | NM_023884_1_-1  |
| Gcnt2        | -1.111 | -4.981 | 0.801  | -1.374 | 0.305  | -2.610 | 1.573  | 1.744  | 4.303  | 3.828  | 14538  | GCNT2           | NM_023887_13_+1 |
| Icam4        | -1.363 | -0.294 | -1.129 | 1.367  | -1.745 | 1.603  | -0.827 | 1.559  | -0.658 | -0.665 | 78369  | ICAM4           | NM_023892_9_+1  |
| Sapcd1       | 0.160  | 0.618  | -4.908 | -4.024 | -3.560 | -3.983 | -3.698 | -4.116 | -3.417 | -4.981 | 78376  | SAPCD1          | NM_023893_17_-1 |
| Plekhj1      | 6.704  | 6.785  | 6.508  | 6.549  | 6.655  | 6.688  | 6.243  | 6.217  | 5.588  | 5.523  | 78670  | PLEKHJ1         | NM_023900_10_-1 |
| Asb3         | 4.277  | 4.255  | 4.424  | 4.134  | 4.305  | 4.426  | 4.056  | 3.989  | 3.813  | 3.721  | 65257  | ASB3 GPR75-ASB3 | NM_023906_11_+1 |
| Slco3a1      | 4.359  | 5.546  | 6.280  | 5.962  | 1.279  | 2.779  | 2.514  | 3.775  | 2.492  | 2.799  | 108116 | SLCO3A1         | NM_023908_7_-1  |
| Tsc22d4      | 5.209  | 4.853  | 5.077  | 5.422  | 6.122  | 6.139  | 6.300  | 6.230  | 7.067  | 7.006  | 78829  | TSC22D4         | NM_023910_5_+1  |
| Scyl1        | 4.769  | 5.069  | 4.736  | 5.039  | 4.815  | 4.852  | 5.350  | 5.451  | 6.494  | 6.356  | 78891  | SCYL1           | NM_023912_19_-1 |
| Ern1         | 3.099  | 3.058  | 3.106  | 3.208  | 2.397  | 2.094  | 3.122  | 3.427  | 5.222  | 5.448  | 78943  | ERN1            | NM_023913_11_-1 |
| Hdac9        | 5.037  | 4.230  | 5.011  | 5.236  | 4.567  | 5.183  | 3.179  | 3.771  | 0.418  | 0.387  | 79221  | HDAC9           | NM_024124_12_-1 |
| Chchd2       | 9.375  | 9.413  | 8.909  | 8.993  | 8.515  | 8.620  | 8.739  | 8.782  | 7.980  | 7.919  | 14004  | CHCHD2          | NM_024166_5_-1  |
| Tsen34       | 5.526  | 5.086  | 5.350  | 4.753  | 5.644  | 4.887  | 5.554  | 4.882  | 5.596  | 5.198  | 66078  | TSEN34          | NM_024168_7_+1  |
| Fkbp11       | 0.938  | 1.218  | -2.213 | -1.824 | -2.818 | -0.535 | 0.876  | 3.250  | -4.394 | -2.137 | 66120  | FKBP11          | NM_024169_15_-1 |
| Cxcl1a       | 3.006  | 2.905  | 3.735  | 4.069  | 2.565  | 2.623  | 1.931  | 3.374  | 2.836  | 3.152  | 66158  | FAM127C         | NM_024170_X_-1  |
| Sec61b       | 9.108  | 8.849  | 7.961  | 7.905  | 7.334  | 7.349  | 8.266  | 7.964  | 7.272  | 7.290  | 66212  | SEC61B          | NM_024171_4_+1  |
| Hspbp1       | 5.322  | 5.031  | 4.827  | 5.055  | 4.802  | 4.742  | 4.899  | 4.990  | 4.687  | 4.353  | 66245  | HSPBP1          | NM_024172_7_-1  |
| Atp6v1g1     | 8.777  | 9.049  | 7.961  | 8.402  | 8.020  | 8.276  | 8.087  | 8.289  | 7.305  | 7.846  | 66290  | ATP6V1G1        | NM_024173_4_+1  |
| Mrps23       | 6.110  | 5.480  | 5.485  | 4.921  | 5.572  | 5.035  | 5.536  | 4.983  | 5.177  | 4.693  | 64656  | MRPS23          | NM_024174_11_+1 |
| Rps23        | 9.594  | 9.504  | 9.952  | 9.856  | 9.879  | 9.830  | 10.174 | 9.856  | 8.992  | 8.731  | 66475  | RPS23           | NM_024175_13_+1 |
| Drap1        | 5.358  | 5.237  | 5.560  | 5.910  | 5.655  | 6.056  | 5.734  | 5.880  | 5.274  | 5.085  | 66556  | DRAP1           | NM_024176_19_-1 |
| Mrpl38       | 5.745  | 5.480  | 4.693  | 4.778  | 5.047  | 5.019  | 4.864  | 4.724  | 4.255  | 4.060  | 60441  | MRPL38          | NM_024177_11_-1 |
| Alg14        | 3.912  | 4.144  | 2.439  | 2.387  | 2.701  | 2.944  | 2.730  | 2.667  | 2.475  | 2.679  | 66789  | ALG14           | NM_024178_3_+1  |
| 061009O20Rik | 1.497  | 1.965  | 2.364  | 2.212  | 2.279  | 2.771  | 1.958  | 1.911  | 2.038  | 1.878  | 66839  | KIAA0141        | NM_024179_18_+1 |
| Ormdl2       | 7.091  | 7.365  | 6.273  | 6.580  | 5.749  | 6.005  | 6.027  | 6.380  | 5.323  | 5.599  | 66844  | ORMDL2          | NM_024180_10_-1 |
| Dnajc10      | 5.767  | 5.890  | 6.126  | 5.972  | 5.406  | 5.677  | 5.626  | 5.790  | 6.612  | 6.695  | 66861  | DNAJC10         | NM_024181_2_+1  |
| RioK3        | 6.307  | 6.357  | 7.357  | 7.355  | 6.909  | 6.973  | 6.768  | 6.776  | 6.956  | 7.011  | 66878  | RIOK3           | NM_024182_18_+1 |
| Fip1l1       | 4.965  | 5.202  | 4.520  | 4.723  | 4.837  | 4.709  | 4.025  | 4.330  | 4.163  | 4.237  | 66899  | NA              | NM_024183_5_+1  |
| Asf1b        | 1.813  | 1.902  | 4.426  | 4.771  | 5.050  | 4.654  | 4.541  | 4.068  | 3.346  | 2.146  | 66929  | ASF1B           | NM_024184_8_+1  |
| Fam188a      | 4.866  | 4.635  | 6.382  | 6.010  | 4.151  | 3.997  | 4.626  | 4.999  | 5.106  | 5.340  | 66960  | FAM188A         | NM_024185_2_-1  |
| Ssbp2        | 3.038  | 3.910  | 2.435  | 1.659  | 0.808  | 0.467  | 2.369  | 2.191  | 3.681  | 3.473  | 66970  | SGBP2           | NM_024186_13_+1 |
| U2af1        | 7.411  | 7.328  | 6.892  | 6.739  | 6.841  | 6.783  | 6.586  | 6.624  | 5.912  | 5.553  | 108121 | NA              | NM_024187_17_-1 |
| Oxct1        | 5.808  | 5.912  | 6.682  | 6.551  | 4.144  | 4.495  | 5.587  | 6.178  | 5.186  | 5.269  | 67041  | OXCT1           | NM_024188_15_+1 |
| Yaf2         | 4.174  | 4.396  | 4.481  | 4.521  | 4.733  | 4.568  | 4.261  | 4.015  | 3.566  | 3.329  | 67057  | NA              | NM_024189_15_-1 |
| Chmp1b       | 6.770  | 6.762  | 6.484  | 6.327  | 5.778  | 6.017  | 6.146  | 6.116  | 6.168  | 6.359  | 67064  | CHMP1B          | NM_024190_18_+1 |
| Arl2bp       | 6.316  | 6.335  | 5.939  | 5.664  | 5.855  | 5.612  | 5.514  | 5.598  | 5.546  | 5.131  | 107566 | ARL2BP          | NM_024191_8_+1  |
| Cuedc2       | 5.065  | 4.950  | 4.253  | 3.979  | 4.406  | 4.423  | 4.634  | 4.094  | 4.185  | 4.220  | 67116  | CUEDC2          | NM_024192_19_-1 |
| Nop56        | 6.430  | 6.611  | 6.504  | 6.743  | 6.972  | 7.094  | 6.636  | 6.780  | 5.639  | 5.458  | 67134  | NOP56           | NM_024193_12_+1 |
| Lrrc40       | 4.266  | 4.561  | 6.485  | 6.550  | 4.749  | 4.668  | 4.572  | 4.527  | 3.774  | 3.537  | 67144  | LRRC40          | NM_024194_3_+1  |
| Cyb5r4       | 6.434  | 5.729  | 7.806  | 7.232  | 7.461  | 6.481  | 7.484  | 6.527  | 7.462  | 6.536  | 266690 | CYB5R4          | NM_024195_9_+1  |
| Tbc1d20      | 3.512  | 3.582  | 3.834  | 3.823  | 3.925  | 3.532  | 3.684  | 4.008  | 5.099  | 5.100  | 67231  | TBC1D20         | NM_024196_2_+1  |
| Ndufa10      | 6.798  | 6.796  | 6.525  | 6.607  | 6.385  | 6.444  | 6.340  | 6.436  | 6.130  | 5.927  | 67273  | NDUFA10         | NM_024197_1_-1  |
| Gpx7         | -4.981 | -1.054 | -0.323 | 0.648  | -2.677 | -2.468 | -2.461 | -0.743 | -2.614 | -0.242 | 67305  | GPX7            | NM_024198_4_-1  |
| Cstf1        | 4.834  | 4.857  | 4.552  | 4.594  | 4.928  | 4.708  | 4.749  | 4.651  | 4.802  | 4.508  | 67337  | CSTF1           | NM_024199_2_+1  |
| Mfn1         | 3.743  | 3.471  | 3.960  | 3.937  | 3.682  | 3.501  | 3.508  | 3.541  | 3.960  | 4.113  | 67414  | MFN1            | NM_024200_3_+1  |
| Ccdc127      | -0.489 | -0.565 | -3.136 | -2.094 | -2.054 | -1.793 | -3.222 | -0.163 | -3.076 | -3.672 | 67433  | CCDC127         | NM_024201_13_+1 |
| Fam120b      | 2.694  | 2.679  | 1.815  | 2.462  | 2.191  | 1.882  | 1.591  | 1.814  | 2.659  | 3.243  | 67544  | FAM120B         | NM_024203_17_+1 |
| Ankrd22      | -4.981 | -4.981 | -4.980 | -4.735 | -4.944 | -3.718 | -4.169 | -2.079 | -1.450 | -4.981 | 52024  | ANKRD22         | NM_024204_19_-1 |
| Jkamp        | 6.155  | 6.461  | 4.578  | 4.832  | 4.405  | 4.639  | 4.570  | 4.718  | 4.396  | 4.376  | 104771 | JKAMP           | NM_024205_12_+1 |
| Sec13        | 7.961  | 8.061  | 7.221  | 7.265  | 7.589  | 7.323  | 7.131  | 7.039  | 6.810  | 6.596  | 110379 | SEC13           | NM_024206_6_-1  |
| Derl1        | 7.471  | 7.562  | 7.410  | 7.384  | 7.070  | 7.353  | 7.302  | 7.592  | 7.899  | 8.039  | 67819  | DERL1           | NM_024207_15_-1 |
| Echdc3       | -1.084 | 0.714  | -2.033 | 0.530  | -3.104 | -2.099 | -2.988 | -1.815 | -1.429 | -2.207 | 67856  | ECHDC3          | NM_024208_2_-1  |
| Ppp6c        | 6.266  | 6.172  | 6.109  | 6.071  | 5.859  | 5.828  | 5.875  | 6.057  | 5.931  | 6.148  | 67857  | PPP6C           | NM_024209_2_-1  |
| 231003P09Rik | 5.127  | 5.120  | 4.582  | 4.574  | 4.979  | 4.972  | 4.975  | 4.434  | 3.541  | 3.222  | 67862  | C1orf35         | NM_024210_11_+1 |
| Slc25a11     | 7.635  | 7.597  | 7.749  | 7.876  | 8.223  | 8.206  | 7.644  | 7.646  | 7.112  | 7.186  | 67863  | SLC25A11        | NM_024211_11_-1 |
| Rpl4         | 9.931  | 9.790  | 10.336 | 10.455 | 10.191 | 10.091 | 10.091 | 10.115 | 9.449  | 9.443  | 67891  | RPL4            | NM_024212_9_+1  |
| Anapc4       | 5.277  | 5.445  | 4.960  | 5.194  | 5.093  | 5.179  | 5.069  | 5.056  | 5.249  | 5.437  | 52206  | ANAPC4          | NM_024213_5_+1  |
| Tomm20       | 7.978  | 7.759  | 7.329  | 7.190  | 7.124  | 7.161  | 6.943  | 6.730  | 5.802  | 5.681  | 67952  | TOMM20          | NM_024214_8_-1  |
| Zfp593       | 4.950  | 4.499  | 4.835  | 4.557  | 4.367  | 4.149  | 4.777  | 4.354  | 3.610  | 3.029  | 68040  | ZNF593          | NM_024215_4_-1  |
| Gpn3         | 5.569  | 5.401  | 4.540  | 4.585  | 4.914  | 4.977  | 4.903  | 4.609  | 4.124  | 3.914  | 68080  | GNP3            | NM_024216_5_+1  |
| Cmtm3        | 6.209  | 6.261  | 6.258  | 6.332  | 5.151  | 5.334  | 6.164  | 6.516  | 6.430  | 6.902  | 68119  | CMTM3           | NM_024217_8_+1  |
| Rpl24        | 8.740  | 8.598  | 8.826  | 8.698  | 8.719  | 8.515  | 8.985  | 8.709  | 7.962  | 7.684  | 68193  | RPL24           | NM_024218_16_+1 |
| Hsbp1        | 7.679  | 7.700  | 7.052  | 6.990  | 6.998  | 7.120  | 7.245  | 7.151  | 6.471  | 6.610  | 68196  | HSPBP1          | NM_024219_8_+1  |
| Ndufc2       | 7.312  | 7.000  | 7.438  | 7.345  | 7.068  | 7.062  | 7.594  | 7.221  | 6.232  | 6.358  | 68197  | NDUFC2          | NM_024220_7_+1  |
| Pdhb         | 7.525  | 7.576  | 6.948  | 6.906  | 7.026  | 6.998  | 6.850  | 6.816  | 6.562  | 6.477  | 68263  | PDHB            | NM_024221_14_-1 |
| Stt3b        | 6.530  | 6.663  | 5.773  | 5.940  | 6.331  | 6.906  | 6.157  | 6.581  | 6.760  | 7.183  | 68292  | STT3B           | NM_024222_9_-1  |

|               |        |        |        |        |        |        |        |        |        |        |        |          |                  |
|---------------|--------|--------|--------|--------|--------|--------|--------|--------|--------|--------|--------|----------|------------------|
| Crip2         | 3.970  | 2.732  | 2.244  | 2.594  | 3.142  | 2.565  | 3.376  | 3.907  | 2.246  | 2.684  | 68337  | NA       | NM_024223_12_+_1 |
| Snx5          | 8.818  | 9.237  | 6.198  | 6.036  | 6.788  | 6.695  | 6.649  | 6.909  | 6.527  | 7.073  | 69178  | SNX5     | NM_024225_2_-_1  |
| Rtn4          | 5.568  | 4.224  | 4.623  | 2.234  | 3.704  | 1.383  | 4.499  | 1.958  | 2.148  | 0.584  | 68585  | RTN4     | NM_024226_11_+_1 |
| Mrpl28        | 7.124  | 6.985  | 6.140  | 6.445  | 6.202  | 6.254  | 6.118  | 6.314  | 5.931  | 5.773  | 68611  | MRPL28   | NM_024227_17_+_1 |
| Gdpd3         | -2.099 | -1.422 | -0.325 | -0.448 | 1.555  | 2.067  | 2.161  | 1.570  | 2.710  | 2.466  | 68616  | GDPD3    | NM_024228_7_+_1  |
| Pcyt2         | 6.435  | 6.827  | 6.432  | 6.358  | 5.933  | 6.003  | 5.525  | 5.956  | 5.402  | 5.506  | 68671  | PCYT2    | NM_024229_11_-_1 |
| Zfpl1         | 5.784  | 5.829  | 4.880  | 4.983  | 4.916  | 5.015  | 4.879  | 4.965  | 4.915  | 4.879  | 81909  | ZFPL1    | NM_024231_19_-_1 |
| Rexo2         | 8.818  | 8.179  | 6.329  | 6.346  | 6.000  | 6.254  | 6.274  | 7.038  | 6.142  | 6.592  | 104444 | REXO2    | NM_024233_9_-_1  |
| Qdpr          | 7.165  | 7.078  | 5.851  | 5.657  | 5.832  | 5.585  | 5.804  | 5.506  | 4.805  | 4.066  | 110391 | QDPR     | NM_024236_5_-_1  |
| Stambp        | 5.913  | 5.998  | 5.300  | 5.314  | 5.010  | 5.204  | 5.212  | 5.050  | 5.067  | 5.007  | 70527  | STAMPB   | NM_024239_6_-_1  |
| Gins4         | 5.898  | 6.012  | 5.219  | 5.220  | 5.516  | 5.687  | 5.413  | 5.361  | 4.787  | 4.734  | 109145 | GIN54    | NM_024240_8_-_1  |
| Kif24         | 0.215  | 0.121  | 1.061  | 0.394  | 0.718  | 1.016  | 0.605  | 0.446  | 0.316  | 0.631  | 109242 | KIF24    | NM_024241_4_-_1  |
| RioK1         | 5.580  | 5.553  | 5.145  | 5.294  | 5.378  | 5.475  | 5.153  | 5.162  | 4.594  | 4.853  | 71340  | RIOK1    | NM_024242_13_+_1 |
| Fuca1         | 7.444  | 7.228  | 9.918  | 9.918  | 7.247  | 7.303  | 7.501  | 7.915  | 7.477  | 7.493  | 71665  | FUCA1    | NM_024243_4_+_1  |
| Kif23         | 0.601  | -0.329 | 5.489  | 5.262  | 5.115  | 4.258  | 4.422  | 3.933  | 3.505  | 3.810  | 71819  | KIF23    | NM_024245_9_-_1  |
| Tmem79        | -0.792 | -1.073 | -0.445 | -0.472 | -1.166 | -2.047 | -0.957 | -1.267 | 0.680  | 1.154  | 71913  | TMEM79   | NM_024246_3_-_1  |
| Cars2         | 4.631  | 4.788  | 3.845  | 3.938  | 4.264  | 4.337  | 4.032  | 3.822  | 3.932  | 3.728  | 71941  | CARS2    | NM_024248_8_-_1  |
| Slc38a10      | -2.884 | 0.843  | 1.324  | -1.006 | 0.273  | 0.593  | 0.680  | -0.535 | 1.763  | -1.010 | 72055  | SLC38A10 | NM_024249_11_-_1 |
| Phf10         | 4.894  | 5.057  | 6.370  | 6.500  | 5.005  | 5.221  | 5.303  | 5.845  | 5.685  | 5.899  | 72057  | PHF10    | NM_024250_17_-_1 |
| Aplf          | 1.152  | 1.831  | 1.541  | 1.867  | 0.593  | 1.253  | 1.084  | 1.355  | 0.239  | -0.142 | 72103  | APLF     | NM_024251_6_-_1  |
| Nkg7          | 2.645  | 0.675  | 0.205  | 1.197  | 0.240  | 3.280  | 2.058  | 4.021  | 2.713  | -0.193 | 72310  | NKG7     | NM_024253_7_+_1  |
| Katnbl1       | 4.045  | 4.335  | 4.053  | 4.080  | 3.825  | 3.673  | 4.184  | 3.834  | 3.955  | 4.358  | 72425  | KATNBL1  | NM_024254_2_+_1  |
| Hsdl2         | 6.301  | 6.256  | 6.242  | 5.990  | 5.087  | 5.007  | 4.751  | 4.980  | 4.193  | 4.373  | 72479  | NA       | NM_024255_4_+_1  |
| B3gat3        | 4.732  | 4.683  | 3.914  | 4.053  | 4.231  | 4.230  | 4.161  | 4.156  | 4.519  | 4.358  | 72727  | B3GAT3   | NM_024256_19_+_1 |
| Hdhd3         | 1.479  | 1.602  | 0.410  | 2.436  | -0.219 | 1.149  | -0.947 | 1.124  | -1.190 | 0.516  | 72748  | HDHD3    | NM_024257_4_-_1  |
| Usp16         | 5.740  | 5.836  | 5.587  | 5.597  | 5.765  | 5.885  | 5.580  | 5.595  | 4.975  | 5.205  | 74112  | USP16    | NM_024258_16_+_1 |
| Vps50         | 4.907  | 4.884  | 4.914  | 4.770  | 4.808  | 5.036  | 4.850  | 4.995  | 4.833  | 5.440  | 73288  | VPS50    | NM_024260_6_+_1  |
| Armt1         | 3.757  | 3.848  | 3.808  | 4.287  | 4.038  | 4.285  | 3.936  | 4.267  | 3.899  | 4.195  | 73419  | ARMT1    | NM_024261_10_+_1 |
| Smg8          | 3.360  | 3.526  | 3.845  | 3.879  | 3.592  | 3.240  | 3.525  | 3.601  | 4.424  | 4.301  | 74133  | SMG8     | NM_024262_11_-_1 |
| Mxra8         | -1.501 | -0.059 | -3.083 | 1.689  | -1.342 | 1.773  | -2.086 | 1.481  | -2.472 | -0.343 | 74761  | MXRA8    | NM_024263_4_+_1  |
| Cyp27a1       | 6.740  | 6.901  | 8.378  | 8.303  | 7.599  | 7.466  | 7.703  | 7.701  | 7.787  | 7.718  | 104086 | CYP27A1  | NM_024264_1_+_1  |
| Rps25         | 9.960  | 9.886  | 10.411 | 10.272 | 10.235 | 10.155 | 10.493 | 10.289 | 9.162  | 8.951  | 75617  | RPS25    | NM_024266_9_+_1  |
| Ipo4          | 3.193  | 2.850  | 3.887  | 4.376  | 3.174  | 3.500  | 3.210  | 3.783  | 3.442  | 3.891  | 75751  | IPO4     | NM_024267_14_-_1 |
| Arl2bp        | 1.189  | 1.875  | -0.255 | 2.719  | 0.496  | 1.869  | 1.005  | 2.336  | 1.818  | 2.744  | 107566 | ARL2BP   | NM_024269_8_+_1  |
| Stard3nl      | 5.984  | 5.666  | 7.364  | 6.561  | 6.175  | 5.839  | 6.180  | 5.560  | 6.468  | 5.244  | 76205  | STARD3NL | NM_024270_13_-_1 |
| 1700016D06Rik | -4.981 | -3.315 | -3.373 | -4.092 | -3.873 | -4.720 | -4.225 | -4.709 | -3.823 | -4.342 | 76413  | NA       | NM_024271_8_-_1  |
| Ssbp2         | 5.666  | 5.313  | 3.571  | 3.000  | 2.001  | 1.563  | 3.502  | 3.912  | 4.251  | 4.395  | 66970  | SSBP2    | NM_024272_13_+_1 |
| Timmdc1       | 1.534  | 4.771  | 1.739  | 3.885  | 1.732  | 3.495  | 1.394  | 3.793  | 1.387  | 3.750  | 76916  | TIMMDC1  | NM_024273_16_-_1 |
| Fars2         | 5.136  | 4.917  | 4.494  | 4.298  | 4.016  | 4.049  | 4.209  | 4.278  | 4.499  | 4.253  | 69955  | FARS2    | NM_024274_13_+_1 |
| Rps27a        | 9.246  | 9.136  | 9.726  | 9.626  | 9.666  | 9.680  | 9.900  | 9.601  | 8.827  | 8.554  | 78294  | RPS27A   | NM_024277_11_-_1 |
| Rrbp1         | 7.000  | 6.893  | 7.036  | 6.931  | 6.721  | 6.683  | 7.032  | 6.882  | 7.064  | 6.915  | 81910  | NA       | NM_024281_2_-_1  |
| Desi2         | 4.525  | 4.707  | 4.485  | 4.367  | 4.131  | 4.057  | 4.614  | 4.538  | 5.082  | 5.383  | 78825  | DESI2    | NM_024282_1_+_1  |
| 1500015O10Rik | -4.981 | -4.981 | -4.639 | -4.748 | -4.757 | -4.684 | -4.869 | -4.824 | -4.394 | -3.461 | 78896  | C2orf40  | NM_024283_1_+_1  |
| Hagh          | 6.296  | 6.177  | 5.868  | 6.093  | 5.500  | 6.295  | 5.489  | 6.110  | 5.674  | 5.751  | 14651  | HAGH     | NM_024284_17_+_1 |
| Rab6a         | 5.391  | 5.361  | 6.415  | 6.432  | 5.487  | 5.493  | 5.632  | 5.591  | 6.243  | 6.423  | 19346  | RAB6A    | NM_024287_7_+_1  |
| Rmnd5a        | 6.226  | 5.902  | 5.846  | 5.869  | 5.475  | 5.669  | 5.463  | 5.352  | 5.377  | 5.918  | 68477  | RMND5A   | NM_024288_6_-_1  |
| Osbpl5        | -0.665 | -3.487 | -4.425 | -4.731 | -2.660 | -4.874 | -2.772 | -4.858 | -4.725 | -4.640 | 79196  | OSBPL5   | NM_024289_7_-_1  |
| Tnfrsf23      | -0.311 | -4.981 | 2.759  | 2.949  | 1.005  | 1.717  | 1.580  | 1.888  | 0.818  | 1.434  | 79201  | NA       | NM_024290_7_-_1  |
| Ky            | -4.981 | -4.981 | -4.792 | -3.235 | -4.978 | -4.978 | -4.937 | -4.794 | -4.981 | -4.981 | 16716  | KY       | NM_024291_9_+_1  |
| Fabp4         | -0.285 | -1.404 | -3.219 | -0.854 | -1.775 | -0.980 | 5.789  | 5.253  | 4.081  | 2.956  | 11770  | FABP4    | NM_024406_3_-_1  |
| Clnkna        | -4.981 | -4.981 | -4.981 | -4.981 | -4.981 | -4.981 | -4.967 | -4.957 | -4.981 | -3.183 | 12733  | CLCNKB   | NM_024412_4_-_1  |
| Plekfh1       | 0.009  | -0.910 | 0.009  | 0.194  | -1.374 | -1.090 | -0.344 | 0.071  | 1.346  | 1.571  | 72287  | PLEKHF1  | NM_024413_7_-_1  |
| Stx1b         | -4.981 | -2.583 | -2.961 | -4.699 | -4.654 | -4.847 | -4.940 | -4.912 | -4.981 | -4.981 | 56216  | STX1B    | NM_024414_7_-_1  |
| Tpm1          | -2.769 | -3.571 | -2.483 | -1.870 | -4.966 | -4.324 | -3.178 | -4.306 | -3.271 | -3.989 | 22003  | NA       | NM_024427_9_-_1  |
| Dpy30         | -4.921 | -4.870 | -3.820 | -3.843 | -3.990 | -4.877 | -4.882 | -2.959 | -4.978 | -3.049 | 66310  | DPY30    | NM_024428_17_-_1 |
| Morf4l1       | 8.676  | 8.778  | 8.444  | 8.509  | 8.637  | 8.671  | 8.554  | 8.538  | 8.370  | 8.429  | 21761  | MORF4L1  | NM_024431_9_-_1  |
| Ubxn6         | 6.042  | 6.136  | 5.369  | 5.318  | 4.779  | 4.961  | 5.122  | 5.064  | 5.489  | 5.189  | 66530  | UBXN6    | NM_024432_17_-_1 |
| Mtap          | 5.090  | 4.269  | 4.912  | 4.090  | 5.232  | 4.912  | 4.796  | 4.352  | 4.666  | 3.198  | 66902  | MTAP     | NM_024433_4_+_1  |
| Lap3          | 4.931  | 4.839  | 5.698  | 6.252  | 4.354  | 4.810  | 4.705  | 5.153  | 4.275  | 4.380  | 66988  | LAP3     | NM_024434_5_+_1  |
| Rab22a        | 5.462  | 5.586  | 5.609  | 5.469  | 5.465  | 5.340  | 5.259  | 5.480  | 5.695  | 5.535  | 19334  | RAB22A   | NM_024436_2_+_1  |
| Nudt7         | 4.170  | 3.971  | 2.363  | 2.687  | 2.449  | 2.791  | 2.909  | 2.745  | 3.061  | 3.292  | 67528  | NUDT7    | NM_024437_8_+_1  |
| Dusp19        | 3.991  | 4.251  | 3.282  | 3.542  | 3.066  | 3.337  | 2.524  | 2.502  | 0.197  | 1.562  | 68082  | DUSP19   | NM_024438_2_+_1  |
| Vimp          | 8.857  | 8.784  | 7.990  | 7.993  | 7.101  | 7.241  | 7.028  | 7.184  | 6.426  | 6.540  | 109815 | SELENOS  | NM_024439_7_+_1  |
| Derl3         | 1.735  | 2.368  | 0.276  | 0.853  | -0.276 | 0.781  | 1.890  | 4.352  | -4.394 | -0.122 | 70377  | DERL3    | NM_024440_10_+_1 |
| Hspb2         | -1.605 | 0.074  | -3.721 | -3.832 | -4.981 | -4.981 | -4.185 | -4.776 | -4.981 | -3.758 | 69253  | HSPB2    | NM_024441_9_-_1  |
| Cyp4f16       | 5.031  | 4.581  | 5.890  | 4.991  | 9.812  | 8.824  | 8.532  | 7.237  | 7.353  | 6.212  | 70101  | NA       | NM_024442_17_+_1 |
| Cyp4f18       | 5.860  | 7.011  | 2.427  | 2.727  | 4.446  | 5.100  | 7.873  | 7.765  | 9.194  | 8.676  | 72054  | CYP4F2   | NM_024444_8_-_1  |
| Nudt7         | -1.580 | -0.552 | -1.197 | -2.159 | -1.394 | -0.690 | -1.754 | -2.880 | -1.354 | -1.555 | 67528  | NUDT7    | NM_024446_8_+_1  |
| Rab12         | 4.520  | 4.646  | 4.225  | 4.203  | 3.923  | 3.945  | 4.111  | 3.801  | 4.119  | 4.330  | 19328  | RAB12    | NM_024448_17_-_1 |
| Scd3          | -4.981 | -2.468 | 0.888  | 2.851  | -2.875 | -4.803 | -3.973 | -0.661 | -3.598 | -4.057 | 30049  | NA       | NM_024450_19_+_1 |
| Sun1          | 2.922  | 2.899  | 2.503  | 2.066  | 2.672  | 2.616  | 2.328  | 4.008  | 6.291  | 5.885  | 77053  | SUN1     | NM_024451_5_+_1  |
| Luzp1         | 1.320  | 1.290  | 4.698  | 4.603  | 4.128  | 3.519  | 4.286  | 3.984  | 3.691  | 3.137  | 269593 | LUZP1    | NM_024452_4_+_1  |
| Rab21         | 6.681  | 6.648  | 5.930  | 5.839  | 6.801  | 6.382  | 6.076  | 5.386  | 5.495  | 5.483  | 216344 | RAB21    | NM_024454_10_-_1 |
| Rab5c         | 3.738  | 3.801  | 4.479  | 4.261  | 4.032  | 4.151  | 4.534  | 4.085  | 4.695  | 4.405  | 19345  | RAB5C    | NM_024456_11_-_1 |

|               |         |        |        |        |        |        |        |        |        |        |        |        |          |                       |
|---------------|---------|--------|--------|--------|--------|--------|--------|--------|--------|--------|--------|--------|----------|-----------------------|
|               | Rap1b   | 8.527  | 8.649  | 8.967  | 9.041  | 9.042  | 9.109  | 9.598  | 9.816  | 10.396 | 10.679 | 215449 | RAP1B    | NM_024457_10_-_1      |
|               | Ppp3r1  | 7.355  | 7.445  | 7.546  | 7.570  | 8.141  | 8.177  | 7.799  | 7.462  | 7.203  | 7.615  | 19058  | PPP3R1   | NM_024459_11_+_1      |
|               | Ost4    | 7.996  | 7.964  | 7.860  | 7.787  | 7.519  | 7.488  | 7.866  | 7.691  | 6.974  | 6.627  | 67695  | NA       | NM_024460_5_-_1       |
| 1810037117Rik | Svbp    | 6.907  | 7.040  | 7.075  | 7.211  | 6.985  | 6.985  | 7.025  | 6.613  | 5.754  | 5.553  | 67704  | NA       | NM_024461_3_+_1       |
|               | Pigx    | 6.996  | 7.203  | 4.302  | 4.775  | 4.175  | 4.847  | 4.879  | 5.063  | 4.425  | 4.324  | 69216  | SVBP     | NM_024462_4_+_1       |
|               | Abhd12  | 5.672  | 5.550  | 4.393  | 4.321  | 4.745  | 4.649  | 5.096  | 4.866  | 4.914  | 4.694  | 72084  | PIGX     | NM_024464_16_-_1      |
|               | Zfp319  | 6.125  | 6.340  | 6.824  | 6.955  | 7.766  | 8.006  | 7.790  | 7.843  | 7.812  | 7.958  | 76192  | ABHD12   | NM_024465_2_-_1       |
|               | Trim39  | 2.335  | 2.438  | 2.455  | 2.034  | 2.571  | 2.153  | 2.430  | 2.354  | 3.762  | 3.541  | 79233  | ZNF319   | NM_024467_8_-_1       |
|               | Bhlhe41 | 0.358  | 1.178  | 0.868  | 0.294  | 0.371  | 0.942  | 0.269  | -0.732 | -1.482 | -0.358 | 79263  | TRIM39   | NM_024468_17_-_1      |
|               | Klra23  | -2.821 | -4.981 | -4.752 | -2.816 | -3.993 | -3.197 | -2.720 | -0.006 | -4.981 | -4.453 | 79362  | NA       | NM_024469_6_-_1       |
|               | Lias    | -4.981 | -4.853 | -0.909 | -2.762 | -4.971 | -4.931 | -3.863 | -4.766 | -4.981 | -4.981 | 79410  | NA       | NM_024470_6_-_1       |
|               | Cptp    | 5.868  | 5.846  | 4.788  | 4.757  | 5.013  | 4.967  | 5.031  | 4.892  | 4.657  | 4.654  | 79464  | LIAS     | NM_024471_5_+_1       |
| BC005537      | Ublcp1  | 3.364  | 2.585  | 4.438  | 4.208  | 2.848  | 2.950  | 3.132  | 3.100  | 3.855  | 3.355  | 79554  | CPTP     | NM_024472_4_-_1       |
|               | Grpel1  | 4.602  | 4.684  | 4.495  | 4.271  | 3.890  | 4.273  | 4.347  | 4.708  | 5.084  | 5.333  | 79555  | C6orf62  | NM_024473_13_+_1      |
|               | Wbscr27 | 4.963  | 4.983  | 5.357  | 4.985  | 5.462  | 5.155  | 5.323  | 4.695  | 4.517  | 3.497  | 79560  | UBLCP1   | NM_024475_11_-_1      |
|               | Sh3bp5l | 7.357  | 7.175  | 6.660  | 6.672  | 6.637  | 6.616  | 6.574  | 6.523  | 5.917  | 5.765  | 17713  | GRPEL1   | NM_024478_5_+_1       |
|               | Car13   | 0.763  | 1.098  | 0.372  | 1.089  | 0.252  | 1.314  | -0.332 | 0.286  | -0.237 | -2.285 | 79565  | WBSCR27  | NM_024479_5_+_1       |
|               | Slc43a1 | 3.070  | 3.391  | 3.153  | 3.745  | 2.585  | 2.555  | 2.671  | 3.146  | 3.906  | 4.408  | 79566  | SH3BP5L  | NM_024480_11_+_1      |
|               | SgtA    | -2.388 | 0.333  | -0.897 | 0.373  | 0.410  | 0.035  | -0.305 | 0.251  | -0.683 | -0.022 | 71934  | CA13     | NM_024495_3_+_1       |
|               | Atp6v0e | 0.733  | -3.888 | -2.928 | 0.071  | -1.720 | -0.847 | -2.884 | 0.804  | -2.941 | -0.113 | 72401  | SLC43A1  | NM_024497_2_+_1       |
|               | Pcbd1   | 5.662  | 5.777  | 5.446  | 5.663  | 5.712  | 5.629  | 5.607  | 5.780  | 6.103  | 6.031  | 52551  | SGTA     | NM_024499_10_-_1      |
|               | Amz2    | 9.643  | 9.718  | 9.569  | 9.130  | 8.959  | 8.921  | 8.961  | 8.648  | 8.394  | 7.901  | 11974  | ATP6V0E1 | NM_025272_17_+_1      |
|               | Evpl    | 2.211  | 3.072  | -3.560 | -2.224 | -2.228 | -2.463 | -3.568 | -2.676 | -2.989 | -4.316 | 13180  | PCBD1    | NM_025273_10_+_1      |
|               | Gng12   | 5.203  | 5.328  | 3.304  | 3.093  | 2.067  | 2.246  | 1.889  | 2.318  | 2.215  | 2.709  | 13929  | NA       | NM_025275_11_+_1      |
|               | Hnmpk   | 0.478  | 1.510  | -2.645 | -1.767 | -4.422 | -4.343 | -4.941 | -4.430 | -4.981 | -3.386 | 14027  | EVPL     | NM_025276_11_-_1      |
|               | Kin     | 10.002 | 10.240 | 9.142  | 9.255  | 9.388  | 9.589  | 8.842  | 8.835  | 7.973  | 8.188  | 14700  | GNG10    | NM_025277_4_+_1       |
|               | Lyar    | 5.938  | 5.739  | 4.896  | 4.794  | 0.134  | 0.411  | 3.210  | 3.539  | 4.416  | 4.391  | 14701  | GNG12    | NM_025278_6_+_1       |
|               | Mef2c   | 7.645  | 7.700  | 7.945  | 8.079  | 8.065  | 7.996  | 7.860  | 8.052  | 7.923  | 7.974  | 15387  | HNRNPK   | NM_025279_13_-_1      |
|               | Mob4    | 4.659  | 4.816  | 4.278  | 4.283  | 4.317  | 4.173  | 4.230  | 3.983  | 3.976  | 3.833  | 16588  | KIN      | NM_025280_2_+_1       |
|               | Tmsb10  | 5.227  | 5.072  | 4.692  | 4.842  | 5.003  | 5.135  | 5.138  | 5.187  | 3.916  | 3.661  | 17089  | LYAR     | NM_025281_5_+_1       |
|               | Sra1    | 5.669  | 5.950  | 3.091  | 3.983  | 4.377  | 4.716  | 4.463  | 4.763  | 4.387  | 5.005  | 17260  | MEF2C    | NM_025282_13_+_1      |
|               | Synj2bp | 6.842  | 7.176  | 6.067  | 5.842  | 6.046  | 6.045  | 6.145  | 5.966  | 5.805  | 6.074  | 19070  | MOB4     | NM_025283_1_+_1       |
|               | Natd1   | 7.180  | 7.222  | 9.987  | 9.708  | 9.162  | 8.829  | 8.971  | 8.801  | 9.566  | 8.454  | 19240  | NA       | NM_025284_6_-_1       |
|               | Btd     | 3.877  | 3.854  | 6.323  | 6.400  | 3.510  | 3.392  | 5.073  | 5.752  | 5.833  | 5.928  | 20530  | SLC31A2  | NM_025286_4_+_1       |
|               | Ciao1   | 6.969  | 6.717  | 8.583  | 8.586  | 7.426  | 7.326  | 7.605  | 7.652  | 8.193  | 8.255  | 20747  | SPOP     | NM_025287_11_+_1      |
|               | Mecr    | -4.981 | -4.981 | -4.949 | -4.949 | -4.970 | -4.794 | -4.084 | -1.696 | -1.893 | -4.227 | 20863  | NA       | NM_025288_16_-_1      |
|               | Mrpl15  | 6.992  | 6.991  | 7.645  | 7.704  | 7.476  | 7.370  | 6.991  | 6.617  | 4.715  | 4.481  | 21376  | TBRG1    | NM_025289_9_-_1       |
|               | Mrpl17  | -4.981 | -2.239 | 0.433  | 0.853  | -1.007 | -0.761 | -0.960 | 0.198  | -1.904 | -1.439 | 22092  | RSPH1    | NM_025290_17_-_1      |
|               | Stau2   | 7.268  | 7.428  | 6.342  | 6.436  | 6.515  | 6.439  | 6.557  | 6.472  | 5.985  | 5.766  | 24068  | SRA1     | NM_025291_18_-_1      |
|               | Lcmt1   | 5.033  | 5.209  | 5.155  | 5.317  | 5.177  | 5.175  | 5.110  | 4.963  | 4.703  | 4.991  | 24071  | SYNJ2BP  | NM_025292_12_-_1      |
|               | Mrps7   | 2.528  | 2.557  | 3.416  | 3.672  | 3.073  | 3.057  | 3.343  | 3.193  | 4.106  | 4.095  | 24083  | NATD1    | NM_025294_11_-_1      |
|               | Ftsj3   | 5.634  | 5.722  | 2.976  | 3.193  | 3.233  | 3.137  | 3.506  | 3.772  | 4.283  | 4.382  | 26363  | BTD      | NM_025295_14_+_1      |
|               | Mrpl15  | 5.608  | 5.474  | 5.015  | 5.114  | 5.449  | 5.366  | 5.284  | 5.029  | 4.698  | 4.603  | 26371  | CIAO1    | NM_025296_2_-_1       |
|               | Mrpl17  | 5.389  | 5.235  | 3.934  | 4.020  | 3.612  | 3.631  | 3.545  | 3.858  | 3.409  | 3.119  | 26922  | MECR     | NM_025297_4_+_1       |
|               | Stau2   | 3.951  | 3.572  | 4.064  | 4.223  | 4.181  | 4.040  | 4.050  | 3.918  | 4.492  | 4.142  | 26939  | POLR3E   | NM_025298_7_+_1       |
|               | Mrpl15  | 6.051  | 6.358  | 6.274  | 6.523  | 5.704  | 5.916  | 5.753  | 6.144  | 4.458  | 4.908  | 27366  | TXNL4A   | NM_025299_18_+_1      |
|               | Mrpl17  | 4.401  | 4.514  | 4.240  | 4.117  | 4.016  | 3.888  | 4.158  | 3.868  | 2.771  | 2.807  | 27395  | MRPL15   | NM_025300_1_-_1       |
|               | Mrpl17  | 6.786  | 6.496  | 6.694  | 6.864  | 6.529  | 6.590  | 6.595  | 6.431  | 5.477  | 5.153  | 27397  | MRPL17   | NM_025301_7_-_1       |
|               | Stau2   | 6.377  | 6.404  | 5.734  | 5.863  | 5.604  | 5.763  | 5.672  | 5.676  | 5.346  | 4.930  | 27398  | MRPL2    | NM_025302_17_+_1      |
|               | Lcmt1   | 0.888  | 2.081  | -0.232 | 0.929  | 1.092  | 2.107  | -1.207 | 0.554  | -2.736 | -1.881 | 29819  | STAU2    | NM_025303_1_-_1       |
|               | Mrps7   | 3.902  | 4.383  | 4.213  | 4.495  | 3.617  | 3.694  | 3.764  | 4.030  | 4.024  | 3.750  | 30949  | LCMT1    | NM_025304_7_+_1       |
|               | Ftsj3   | 6.399  | 6.108  | 6.138  | 6.019  | 5.938  | 5.583  | 5.698  | 5.415  | 4.979  | 4.402  | 50529  | MRPS7    | NM_025305_11_+_1      |
|               | Mrps7   | 4.578  | 4.261  | 5.143  | 5.329  | 5.256  | 5.223  | 5.223  | 5.202  | 4.606  | 4.325  | 56095  | FTSJ3    | NM_025310_11_-_1      |
|               | Mrps7   | 0.852  | -0.131 | -3.648 | -4.739 | -4.357 | -4.173 | -3.773 | -3.596 | -3.920 | -4.027 | 66039  | NA       | NM_025311_14_-_1      |
|               | Mrps7   | -1.732 | -1.593 | -4.166 | -4.919 | -4.700 | -4.725 | -4.742 | -4.793 | -4.041 | -4.248 | 66039  | NA       | NM_025311_dup1_14_-_2 |
|               | Mrps7   | 1.300  | -1.523 | -4.166 | -4.919 | -4.700 | -4.725 | -4.742 | -4.792 | -4.041 | -4.248 | 66039  | NA       | NM_025311_dup2_14_-_3 |
|               | Mrps7   | -2.115 | -1.786 | -2.435 | -4.550 | -4.952 | -4.578 | -4.953 | -4.866 | -4.981 | -4.981 | 66042  | SOSTDC1  | NM_025312_12_+_1      |
|               | Mrps7   | 8.331  | 8.337  | 7.821  | 7.804  | 7.785  | 7.618  | 7.850  | 7.818  | 7.295  | 7.022  | 66043  | ATP5D    | NM_025313_10_+_1      |
|               | Mrps7   | 3.845  | 4.149  | 4.095  | 4.489  | 4.298  | 4.467  | 4.283  | 4.467  | 2.953  | 3.030  | 66044  | DTD1     | NM_025314_2_+_1       |
|               | Mrps7   | 6.933  | 7.231  | 5.905  | 6.048  | 6.062  | 6.419  | 5.963  | 5.865  | 4.812  | 5.069  | 108098 | MED21    | NM_025315_6_+_1       |
|               | Mrps7   | 7.343  | 7.139  | 6.854  | 6.784  | 6.565  | 6.699  | 6.824  | 6.702  | 6.153  | 5.964  | 66046  | NDUF5    | NM_025316_3_+_1       |
|               | Mrps7   | 6.738  | 6.704  | 6.479  | 6.456  | 6.104  | 6.255  | 6.369  | 6.101  | 5.300  | 5.059  | 66047  | MRPL54   | NM_025317_10_-_1      |
|               | Mrps7   | 6.840  | 6.742  | 6.422  | 6.460  | 6.208  | 6.268  | 6.556  | 6.133  | 5.181  | 4.916  | 66048  | EMC6     | NM_025318_11_-_1      |
| 0610009822Rik | Sdhc    | 4.864  | 5.114  | 4.806  | 4.582  | 4.248  | 4.395  | 4.686  | 4.130  | 3.618  | 3.869  | 66050  | NA       | NM_025319_11_-_1      |
|               | Sdhc    | 6.359  | 5.788  | 5.997  | 5.894  | 5.903  | 5.659  | 5.887  | 5.797  | 6.196  | 6.037  | 66052  | SDHC     | NM_025321_1_-_1       |
|               | Sfhb6   | 8.115  | 8.115  | 7.498  | 7.388  | 7.345  | 7.383  | 7.547  | 7.327  | 6.658  | 6.611  | 66055  | SF3B6    | NM_025323_12_+_1      |
|               | Sfhb6   | 5.363  | 5.309  | 4.227  | 4.073  | 4.332  | 4.051  | 4.432  | 4.074  | 4.301  | 4.218  | 66056  | ZNF524   | NM_025324_7_+_1       |
|               | HaaO    | 7.044  | 6.796  | 5.591  | 5.258  | 6.080  | 5.149  | 5.866  | 4.953  | 5.588  | 4.417  | 107766 | HAAO     | NM_025325_17_-_1      |
|               | HaaO    | 4.867  | 5.098  | 7.023  | 7.513  | 8.982  | 9.125  | 9.857  | 9.933  | 6.462  | 7.390  | 66058  | TMEM176A | NM_025326_6_+_1       |
|               | HaaO    | 8.569  | 8.427  | 6.677  | 6.600  | 6.120  | 6.410  | 6.904  | 7.090  | 6.101  | 6.076  | 66059  | KRTCAP2  | NM_025327_3_+_1       |
|               | HaaO    | 5.378  | 5.806  | 3.844  | 4.627  | 6.923  | 7.780  | 6.258  | 6.131  | 3.870  | 4.475  | 66061  | TCTEX1D2 | NM_025329_16_+_1      |
|               | HaaO    | -2.413 | -4.981 | 0.833  | 1.317  | -1.033 | -1.682 | -1.567 | -2.589 | -3.531 | -3.233 | 66065  | HSD17B14 | NM_025330_7_+_1       |
|               | HaaO    | 0.557  | 1.204  | -0.705 | 0.530  | 0.389  | 1.690  | 1.446  | 2.021  | 1.240  | 2.159  | 66066  | GNG11    | NM_025331_6_+_1       |
|               | HaaO    | 4.543  | 4.563  | 4.066  | 3.884  | 3.661  | 3.103  | 3.497  | 3.394  | 3.140  | 3.276  | 66067  | GTPBP8   | NM_025332_16_-_1      |

|               |        |        |        |        |        |        |        |        |        |        |        |          |                 |
|---------------|--------|--------|--------|--------|--------|--------|--------|--------|--------|--------|--------|----------|-----------------|
| Sdhaf2        | 6.055  | 6.166  | 5.933  | 5.953  | 5.953  | 5.974  | 5.654  | 5.819  | 5.372  | 5.439  | 66072  | SDHAF2   | NM_025333_19_-1 |
| Txndc12       | 4.020  | 4.364  | 3.319  | 3.893  | 3.670  | 3.886  | 3.603  | 4.075  | 3.993  | 4.427  | 66073  | TXNDC12  | NM_025334_4_+1  |
| Tmem167       | 7.731  | 7.714  | 7.374  | 7.360  | 7.120  | 7.291  | 7.396  | 7.197  | 6.921  | 7.093  | 66074  | TMEM167A | NM_025335_13_+1 |
| Chchd3        | 6.231  | 6.176  | 5.509  | 5.558  | 5.563  | 5.600  | 5.432  | 5.358  | 4.595  | 4.842  | 66075  | CHCHD3   | NM_025336_6_-1  |
| Akr7a5        | 4.603  | 4.468  | 6.411  | 6.511  | 6.325  | 6.659  | 5.776  | 5.684  | 4.288  | 3.881  | 110198 | AKR7A2   | NM_025337_4_+1  |
| Aurkaip1      | 6.771  | 6.282  | 6.312  | 6.100  | 6.204  | 5.937  | 6.338  | 5.890  | 5.868  | 5.141  | 66077  | AURKAIP1 | NM_025338_4_+1  |
| Tmem42        | 5.517  | 5.176  | 4.265  | 3.981  | 3.637  | 3.549  | 3.348  | 3.296  | 2.380  | 2.112  | 66079  | TMEM42   | NM_025339_9_+1  |
| Sharpin       | 6.551  | 6.342  | 6.778  | 6.740  | 6.299  | 6.178  | 6.149  | 6.115  | 6.309  | 5.899  | 106025 | SHARPIN  | NM_025340_15_-1 |
| Abhd6         | 6.852  | 6.686  | 3.708  | 3.932  | 5.584  | 5.811  | 4.580  | 4.193  | 0.988  | 0.849  | 66082  | ABHD6    | NM_025341_14_+1 |
| Rmnd1         | 4.661  | 2.220  | 4.724  | 2.344  | 4.771  | 2.297  | 4.611  | 1.536  | 3.867  | 1.576  | 66084  | RMND1    | NM_025343_10_-1 |
| Eif3f         | 7.999  | 8.197  | 7.740  | 7.766  | 7.759  | 7.561  | 7.901  | 7.717  | 7.725  | 7.433  | 66085  | EIF3F    | NM_025344_7_+1  |
| Fopnl         | 6.893  | 7.015  | 5.439  | 5.751  | 6.113  | 6.299  | 5.867  | 5.822  | 5.404  | 5.303  | 66086  | FOPNL    | NM_025345_16_-1 |
| Rmnd5b        | 6.564  | 6.616  | 5.351  | 5.415  | 6.338  | 6.571  | 6.216  | 6.187  | 6.384  | 6.605  | 66089  | RMND5B   | NM_025346_11_-1 |
| Ypel3         | 8.678  | 8.392  | 6.336  | 6.096  | 6.796  | 6.976  | 7.692  | 7.773  | 8.302  | 8.012  | 66090  | YPEL3    | NM_025347_7_+1  |
| Ndufa3        | 7.716  | 7.284  | 7.687  | 7.292  | 7.667  | 7.340  | 7.703  | 7.168  | 6.884  | 6.271  | 66091  | NDUFA3   | NM_025348_7_+1  |
| Lsm7          | 6.573  | 6.454  | 6.007  | 5.897  | 6.044  | 5.989  | 6.477  | 6.181  | 5.099  | 4.638  | 66094  | LSM7     | NM_025349_10_-1 |
| Chchd6        | 5.259  | 5.407  | 4.348  | 4.581  | 3.070  | 3.399  | 3.112  | 3.276  | 1.006  | 1.110  | 66098  | CHCHD6   | NM_025351_6_-1  |
| Uqcrq         | 7.356  | 7.748  | 7.008  | 7.404  | 6.790  | 7.266  | 7.241  | 7.602  | 6.564  | 6.744  | 22272  | UQCRCQ   | NM_025352_11_-1 |
| Ube2d3        | 9.372  | 9.431  | 9.216  | 9.299  | 9.152  | 9.054  | 9.220  | 9.174  | 9.161  | 9.500  | 66105  | UBE2D3   | NM_025356_3_+1  |
| Ndufa9        | 7.566  | 7.405  | 7.234  | 7.383  | 6.885  | 6.815  | 6.858  | 6.987  | 6.422  | 6.359  | 66108  | NDUFA9   | NM_025358_6_-1  |
| Tspan13       | 10.339 | 10.281 | 9.919  | 9.485  | 9.638  | 9.742  | 9.309  | 9.276  | 6.824  | 7.617  | 66109  | SPAN13   | NM_025359_12_-1 |
| Tmed3         | 9.462  | 9.393  | 6.929  | 6.943  | 6.033  | 5.996  | 6.452  | 6.646  | 6.182  | 6.112  | 66111  | TMED3    | NM_025360_9_-1  |
| Dnajc30       | 5.628  | 5.596  | 4.710  | 4.755  | 4.740  | 4.858  | 4.703  | 4.817  | 4.254  | 4.100  | 66114  | DNAJC30  | NM_025362_5_+1  |
| Fmc1          | 5.269  | 4.893  | 4.165  | 4.308  | 4.219  | 4.228  | 5.028  | 4.679  | 4.041  | 3.730  | 66117  | FMC1     | NM_025363_6_+1  |
| Sarnp         | 7.566  | 7.839  | 7.050  | 7.124  | 7.042  | 7.042  | 7.059  | 7.023  | 6.155  | 6.179  | 66118  | SARNP    | NM_025364_10_+1 |
| Tomm6         | 6.193  | 5.621  | 6.409  | 5.817  | 6.606  | 6.039  | 6.846  | 6.180  | 6.282  | 5.565  | 66119  | TOMM6    | NM_025365_17_-1 |
| Chchd1        | 6.317  | 6.039  | 6.024  | 5.931  | 5.771  | 5.860  | 6.036  | 5.896  | 4.810  | 4.701  | 66121  | CHCHD1   | NM_025366_14_+1 |
| Sphk1         | -4.981 | -4.849 | -4.936 | -2.677 | -4.953 | -2.409 | -3.709 | 0.283  | -3.096 | -3.082 | 20698  | SPHK1    | NM_025367_11_+1 |
| Josd2         | 1.021  | 1.530  | 0.836  | -0.018 | -0.041 | 0.437  | 0.117  | 1.099  | 0.223  | -0.454 | 66124  | JOSD2    | NM_025368_7_+1  |
| Mrps36        | 6.156  | 6.135  | 5.922  | 5.909  | 5.514  | 5.590  | 5.740  | 5.720  | 4.363  | 4.342  | 66128  | MRPS36   | NM_025369_13_-1 |
| Aaed1         | 5.725  | 5.365  | 3.333  | 3.334  | 3.058  | 2.950  | 3.540  | 3.590  | 4.539  | 4.290  | 66129  | AAED1    | NM_025370_13_-1 |
| Acy1          | 3.852  | 4.695  | -3.190 | -0.850 | -2.160 | -0.907 | -1.166 | 1.154  | -1.013 | -0.643 | 109652 | ACY1     | NM_025371_9_-1  |
| Tipin         | 6.220  | 6.099  | 5.492  | 5.648  | 6.323  | 6.011  | 5.697  | 5.602  | 3.950  | 3.704  | 66131  | TIPIN    | NM_025372_9_+1  |
| 1110008L16Rik | 3.565  | 3.086  | 3.659  | 4.012  | 3.037  | 3.474  | 3.140  | 3.267  | 2.026  | 2.881  | 66132  | KIAA0391 | NM_025373_12_+1 |
| Glo1          | 5.939  | 5.908  | 6.002  | 6.225  | 6.514  | 6.265  | 5.868  | 5.933  | 5.339  | 5.449  | 109801 | GLO1     | NM_025374_17_-1 |
| Wbscr22       | 6.049  | 6.151  | 5.234  | 5.441  | 5.609  | 5.645  | 5.285  | 5.267  | 4.947  | 4.761  | 66138  | WBSCR22  | NM_025375_5_-1  |
| Tmem8c        | 0.099  | 0.058  | -4.981 | -4.981 | -4.981 | -4.981 | -4.981 | -4.981 | -4.981 | -4.981 | 66139  | TMEM8C   | NM_025376_2_-1  |
| Ska2          | 3.442  | 3.696  | 3.450  | 3.606  | 4.010  | 3.662  | 3.285  | 3.195  | 1.053  | 0.834  | 66140  | SKA2     | NM_025377_11_+1 |
| Ifitm3        | 6.042  | 4.595  | 7.900  | 6.995  | 9.820  | 9.258  | 11.236 | 10.807 | 12.005 | 11.167 | 66141  | IFITM3   | NM_025378_7_-1  |
| Cox7b         | 8.309  | 8.125  | 8.134  | 8.080  | 7.452  | 7.547  | 7.919  | 7.730  | 6.623  | 6.585  | 66142  | COX7B    | NM_025379_X_+1  |
| Eef1e1        | 5.701  | 5.937  | 5.772  | 5.786  | 5.341  | 5.302  | 5.161  | 5.229  | 3.453  | 3.596  | 66143  | EEF1E1   | NM_025380_13_-1 |
| Atp6v1f       | 8.727  | 8.649  | 8.373  | 8.396  | 8.531  | 8.677  | 8.560  | 8.351  | 7.586  | 7.458  | 66144  | ATP6V1F  | NM_025381_6_+1  |
| Tmem57        | 4.764  | 4.805  | 4.714  | 4.435  | 4.756  | 4.796  | 4.241  | 4.108  | 3.695  | 3.760  | 66146  | TMEM57   | NM_025382_4_-1  |
| Necap2        | 8.014  | 7.309  | 7.164  | 6.952  | 7.224  | 6.739  | 7.577  | 7.293  | 8.369  | 7.715  | 66147  | NECAP2   | NM_025383_4_-1  |
| Dnajc15       | 6.753  | 6.372  | 6.581  | 6.452  | 6.205  | 6.072  | 6.748  | 6.279  | 6.042  | 5.720  | 66148  | DNAJC15  | NM_025384_14_-1 |
| Prr13         | 8.460  | 8.450  | 7.161  | 6.949  | 6.822  | 7.169  | 6.814  | 6.994  | 6.903  | 7.231  | 66151  | NA       | NM_025385_15_+1 |
| Fbxo36        | 2.007  | 1.840  | 1.445  | 0.997  | 1.296  | 0.666  | 0.674  | -1.060 | 0.285  | -1.483 | 66153  | FBXO36   | NM_025386_1_+1  |
| Tmem14c       | 7.566  | 1.703  | 7.152  | 2.357  | 7.626  | 2.997  | 7.549  | 2.295  | 7.278  | 2.751  | 66154  | TMEM14C  | NM_025387_13_+1 |
| Ufc1          | 7.340  | 7.175  | 6.449  | 6.514  | 6.038  | 6.285  | 6.167  | 6.191  | 5.654  | 5.790  | 66155  | UFC1     | NM_025388_1_-1  |
| Anapc11       | 5.625  | 5.515  | 4.874  | 4.945  | 4.606  | 4.804  | 4.352  | 4.329  | 3.134  | 3.240  | 66156  | ANAPC11  | NM_025389_11_+1 |
| Pop4          | 5.836  | 4.202  | 4.448  | 3.196  | 4.638  | 3.517  | 4.478  | 3.143  | 4.209  | 2.754  | 66161  | POP4     | NM_025390_7_-1  |
| Nip7          | 5.841  | 5.873  | 6.095  | 5.892  | 5.864  | 5.726  | 5.544  | 5.293  | 4.648  | 4.351  | 66164  | NIP7     | NM_025391_8_+1  |
| Bccip         | 6.969  | 6.861  | 6.286  | 6.354  | 6.439  | 6.572  | 6.431  | 6.476  | 5.836  | 5.712  | 66165  | BCCIP    | NM_025392_7_+1  |
| S100a14       | -4.981 | -4.838 | -4.950 | -4.950 | -4.999 | -4.999 | -4.963 | -4.973 | -4.964 | -4.975 | 66166  | S100A14  | NM_025393_3_+1  |
| Tomm7         | 7.604  | 7.439  | 7.243  | 7.107  | 7.118  | 7.076  | 7.263  | 6.931  | 6.055  | 5.758  | 66169  | TOMM7    | NM_025394_5_-1  |
| Chchd5        | 4.764  | 4.711  | 4.105  | 4.233  | 3.962  | 4.091  | 4.228  | 4.006  | 3.277  | 3.631  | 66170  | CHCHD5   | NM_025395_2_+1  |
| Pgls          | 9.295  | 9.086  | 7.091  | 7.028  | 6.401  | 6.438  | 6.726  | 6.658  | 6.377  | 5.995  | 66171  | PGLS     | NM_025396_8_+1  |
| Med11         | 6.522  | 6.228  | 5.914  | 5.712  | 6.369  | 6.173  | 6.427  | 6.004  | 4.956  | 4.951  | 66172  | MED11    | NM_025397_11_+1 |
| Nudt14        | 6.481  | 6.336  | 5.834  | 5.886  | 5.577  | 5.684  | 5.275  | 4.953  | 3.843  | 3.798  | 66174  | NUDT14   | NM_025399_12_-1 |
| Nat9          | 4.941  | 5.375  | 3.681  | 3.619  | 3.375  | 3.553  | 3.267  | 3.593  | 3.463  | 3.251  | 66176  | NAT9     | NM_025400_11_-1 |
| Ubl5          | 7.689  | 7.541  | 7.553  | 7.480  | 7.485  | 7.705  | 7.641  | 7.401  | 6.489  | 6.255  | 66177  | UBL5     | NM_025401_9_+1  |
| Ogfod3        | 4.931  | 5.088  | 3.330  | 3.465  | 2.778  | 2.752  | 3.458  | 3.529  | 2.818  | 2.670  | 66179  | OGFOD3   | NM_025402_11_-1 |
| Nop10         | 7.700  | 7.246  | 7.355  | 6.969  | 7.225  | 7.125  | 7.669  | 7.232  | 6.216  | 6.038  | 66181  | NOP10    | NM_025403_2_+1  |
| Arl4d         | -0.156 | -1.578 | -0.312 | 0.208  | -0.045 | -0.456 | 0.963  | 0.319  | 0.299  | 0.025  | 80981  | ARL4D    | NM_025404_11_+1 |
| Uqcr1         | 8.245  | 8.230  | 8.067  | 8.255  | 8.116  | 8.079  | 8.190  | 8.513  | 8.640  | 8.488  | 22273  | UQCRC1   | NM_025407_9_+1  |
| Acer3         | 6.186  | 6.523  | 6.893  | 6.954  | 5.965  | 6.324  | 6.969  | 7.383  | 7.683  | 8.380  | 66190  | ACER3    | NM_025408_7_-1  |
| Ier3ip1       | 7.377  | 7.252  | 7.021  | 6.983  | 6.929  | 7.069  | 7.365  | 7.194  | 6.630  | 6.762  | 66191  | IER3IP1  | NM_025409_18_+1 |
| Lage3         | 5.672  | 5.597  | 4.818  | 4.923  | 5.102  | 5.143  | 5.059  | 4.975  | 3.750  | 3.784  | 66192  | NA       | NM_025410_X_-1  |
| Pithd1        | 5.925  | 5.675  | 6.225  | 6.029  | 6.378  | 6.436  | 6.202  | 5.957  | 5.521  | 5.146  | 66193  | PITHD1   | NM_025411_4_-1  |
| Pycrl         | 4.817  | 4.980  | 4.782  | 5.167  | 4.344  | 4.363  | 4.362  | 4.784  | 4.234  | 4.546  | 66194  | PYCRL    | NM_025412_15_-1 |
| Myo19         | 0.069  | 0.330  | -0.426 | 0.839  | -0.549 | -0.542 | -1.192 | 0.496  | -0.664 | -0.070 | 66196  | MYO19    | NM_025414_11_+1 |
| Cks2          | 4.992  | 3.867  | 5.759  | 5.531  | 5.547  | 5.405  | 6.635  | 5.806  | 5.203  | 3.966  | 66197  | CKS2     | NM_025415_13_+1 |
| Commmd4       | 7.975  | 7.954  | 6.861  | 6.915  | 6.961  | 7.011  | 6.902  | 6.923  | 6.026  | 6.042  | 66199  | COMMMD4  | NM_025417_9_-1  |
| Vta1          | 7.109  | 7.172  | 7.032  | 7.055  | 6.504  | 6.458  | 6.268  | 6.274  | 5.853  | 5.837  | 66201  | VTA1     | NM_025418_10_-1 |

|               |        |        |        |        |        |        |        |        |        |        |        |          |                 |
|---------------|--------|--------|--------|--------|--------|--------|--------|--------|--------|--------|--------|----------|-----------------|
| 1110059G10Rik | 6.424  | 6.039  | 5.259  | 5.178  | 4.717  | 4.670  | 5.240  | 5.060  | 4.513  | 4.729  | 66202  | KIAA1143 | NM_025419_9_-1  |
| Acyp1         | 5.239  | 5.251  | 4.563  | 4.495  | 2.752  | 3.052  | 3.669  | 3.930  | 3.330  | 3.399  | 66204  | ACYP1    | NM_025421_12_-1 |
| Cd302         | -1.178 | -4.830 | -1.955 | -0.983 | -0.015 | -0.337 | 0.834  | 0.518  | 2.031  | 2.282  | 66205  | CD302    | NM_025422_2_-1  |
| 1110059E24Rik | 7.313  | 8.027  | 4.910  | 5.279  | 5.052  | 5.746  | 5.021  | 5.938  | 4.408  | 4.743  | 66206  | C9orf85  | NM_025423_19_-1 |
| Nenf          | 5.700  | 5.703  | 4.181  | 4.103  | 4.114  | 4.351  | 4.204  | 4.018  | 2.622  | 2.798  | 66208  | NENF     | NM_025424_1_-1  |
| Rpl3l         | 0.183  | 0.879  | -2.289 | -1.865 | -3.619 | -1.752 | 1.586  | 0.829  | 1.791  | 0.909  | 66211  | RPL3L    | NM_025425_17_+1 |
| Med7          | 5.212  | 5.296  | 5.143  | 5.785  | 5.458  | 5.608  | 5.201  | 5.405  | 4.561  | 5.165  | 66213  | MED7     | NM_025426_11_+1 |
| Rgcc          | 6.306  | 6.576  | -0.265 | 1.827  | 0.943  | 2.774  | 2.852  | 3.963  | 3.423  | 2.494  | 66214  | RGCC     | NM_025427_14_-1 |
| Zdhhc12       | 0.584  | 0.208  | 0.776  | 0.825  | -0.007 | 0.175  | -0.446 | -0.635 | 1.396  | -0.499 | 66220  | ZDHHC12  | NM_025428_2_-1  |
| Serpinb1a     | 2.851  | 2.141  | 4.415  | 4.603  | 3.473  | 5.372  | 4.412  | 5.623  | 5.801  | 4.646  | 66222  | SERPINB1 | NM_025429_13_-1 |
| Mrpl35        | 5.976  | 6.158  | 5.306  | 5.722  | 5.444  | 5.568  | 5.475  | 5.789  | 4.557  | 4.605  | 66223  | MRPL35   | NM_025430_6_-1  |
| Llph          | 7.129  | 7.056  | 6.824  | 6.765  | 6.588  | 6.518  | 6.843  | 6.617  | 5.777  | 5.523  | 66225  | LLPH     | NM_025431_10_+1 |
| Trappc2       | 4.662  | 4.654  | 3.838  | 3.641  | 3.928  | 3.895  | 3.708  | 3.772  | 2.989  | 3.278  | 66226  | TRAPPC2  | NM_025432_X_+1  |
| Rpl7l1        | 6.451  | 6.448  | 7.064  | 6.767  | 7.120  | 6.424  | 6.930  | 6.395  | 6.492  | 5.823  | 66229  | RPL7L1   | NM_025433_17_-1 |
| Mrps28        | 6.221  | 5.871  | 5.679  | 5.829  | 5.421  | 5.514  | 5.495  | 5.402  | 3.941  | 3.684  | 66230  | MRPS28   | NM_025434_3_-1  |
| Thoc7         | 6.584  | 6.589  | 6.414  | 6.195  | 6.313  | 6.124  | 6.172  | 5.987  | 5.377  | 5.294  | 66231  | THOC7    | NM_025435_14_-1 |
| Msmo1         | 8.305  | 8.577  | 5.762  | 4.902  | 5.174  | 5.249  | 5.599  | 6.021  | 6.143  | 6.479  | 66234  | MSMO1    | NM_025436_8_-1  |
| Eif1ax        | 6.191  | 6.014  | 5.941  | 6.097  | 5.422  | 5.501  | 5.668  | 5.673  | 4.631  | 4.971  | 66235  | EIF1AY   | NM_025437_X_+1  |
| Tmem9         | 4.888  | 5.155  | 2.775  | 3.400  | 2.706  | 3.672  | 2.586  | 3.599  | 1.973  | 2.232  | 66241  | TMEM9    | NM_025439_1_+1  |
| Mrps16        | 6.671  | 6.363  | 5.882  | 5.848  | 5.739  | 5.836  | 6.006  | 5.705  | 4.883  | 4.743  | 66242  | MRPS16   | NM_025440_14_-1 |
| Nemf          | 7.128  | 6.951  | 6.723  | 6.708  | 7.023  | 7.103  | 6.868  | 6.737  | 6.098  | 6.412  | 66244  | NEMF     | NM_025441_12_-1 |
| Alg5          | 7.124  | 6.936  | 5.862  | 5.850  | 5.594  | 5.481  | 5.863  | 5.745  | 5.708  | 5.164  | 66248  | ALG5     | NM_025442_3_+1  |
| Pno1          | 5.571  | 5.233  | 5.802  | 5.778  | 5.542  | 5.303  | 5.488  | 5.288  | 4.406  | 4.170  | 66249  | PNO1     | NM_025443_11_-1 |
| Taf13         | 6.298  | 6.311  | 5.901  | 5.744  | 5.475  | 5.553  | 5.372  | 5.299  | 5.095  | 5.073  | 99730  | TAF13    | NM_025444_3_+1  |
| Arfgap3       | 4.802  | 4.731  | 4.300  | 4.407  | 3.517  | 3.399  | 3.871  | 4.225  | 4.381  | 4.325  | 66251  | ARFGAP3  | NM_025445_15_-1 |
| Aig1          | 4.543  | 4.642  | 3.806  | 3.891  | 4.122  | 4.283  | 3.247  | 3.392  | 1.281  | 2.386  | 66253  | AIG1     | NM_025446_10_-1 |
| Dimt1         | 5.254  | 5.143  | 4.374  | 4.377  | 4.585  | 4.747  | 4.357  | 4.291  | 3.620  | 3.457  | 66254  | DIMT1    | NM_025447_13_+1 |
| Ssr2          | 8.265  | 8.085  | 7.065  | 7.367  | 6.631  | 6.650  | 6.760  | 7.083  | 6.426  | 6.623  | 66256  | SSR2     | NM_025448_3_+1  |
| Nicn1         | 3.146  | 3.257  | 0.114  | 0.788  | 2.475  | 2.645  | 1.408  | 1.137  | 0.906  | 1.486  | 66257  | NICN1    | NM_025449_9_+1  |
| Mrps17        | 6.314  | 6.286  | 5.371  | 5.505  | 5.650  | 5.792  | 5.617  | 5.670  | 5.201  | 5.035  | 66258  | MRPS17   | NM_025450_5_+1  |
| Camk2n1       | -4.981 | -2.336 | -4.942 | -4.353 | -4.808 | -4.159 | -2.736 | -3.345 | -4.190 | -2.969 | 66259  | CAMK2N1  | NM_025451_4_+1  |
| Tm4sf20       | -4.981 | -4.981 | -4.821 | -4.973 | -4.964 | -4.795 | -4.917 | -4.948 | -4.981 | -3.797 | 66261  | TM4SF20  | NM_025453_1_-1  |
| Ing5          | 3.805  | 3.804  | 4.323  | 4.136  | 4.516  | 4.355  | 4.528  | 4.454  | 4.788  | 4.493  | 66262  | ING5     | NM_025454_1_+1  |
| Ccdc28b       | 5.278  | 4.858  | 5.531  | 5.122  | 5.652  | 5.037  | 5.664  | 4.962  | 4.796  | 4.796  | 66264  | CCDC28B  | NM_025455_4_-1  |
| Eapp          | 6.922  | 6.795  | 5.962  | 6.060  | 6.042  | 5.981  | 6.223  | 5.926  | 5.651  | 5.435  | 66266  | EAPP     | NM_025456_12_-1 |
| Fam134b       | -4.070 | -3.763 | -2.626 | -0.389 | 0.674  | -4.808 | -0.373 | -3.741 | -4.369 | -2.267 | 66270  | FAM134B  | NM_025459_15_+1 |
| Tmem126a      | 6.396  | 6.267  | 5.594  | 5.659  | 5.246  | 5.266  | 5.395  | 5.079  | 4.482  | 4.480  | 66271  | TMEM126A | NM_025460_7_-1  |
| Cox16         | 6.186  | 6.215  | 4.693  | 4.712  | 5.068  | 5.233  | 5.419  | 5.231  | 4.528  | 4.488  | 66272  | COX16    | NM_025461_12_-1 |
| Ece2          | 4.110  | 3.843  | 4.619  | 4.516  | 3.124  | 2.878  | 3.591  | 3.805  | 3.163  | 3.152  | 107522 | ECE2     | NM_025462_16_+1 |
| 1810009A15Rik | 6.601  | 6.424  | 5.747  | 5.833  | 6.051  | 6.262  | 6.367  | 6.054  | 4.652  | 4.532  | 66276  | C11orf98 | NM_025463_19_+1 |
| Tmem218       | 4.162  | 4.104  | 0.344  | 0.514  | 1.308  | 1.258  | 0.121  | 1.576  | -2.361 | 0.165  | 66279  | TMEM218  | NM_025464_9_+1  |
| Tma16         | 3.658  | 2.653  | 3.510  | 3.188  | 3.160  | 2.994  | 3.112  | 2.524  | 1.591  | 0.952  | 66282  | TMA16    | NM_025465_8_-1  |
| Sec11c        | 9.840  | 9.566  | 8.434  | 8.000  | 7.910  | 7.726  | 7.923  | 8.166  | 7.589  | 7.814  | 66286  | SEC11C   | NM_025468_18_+1 |
| Smim8         | 6.021  | 5.309  | 4.551  | 3.999  | 4.793  | 4.096  | 4.598  | 3.539  | 2.848  | 2.526  | 66291  | SMIM8    | NM_025471_4_-1  |
| Fam3a         | 4.923  | 4.799  | 3.726  | 3.933  | 3.978  | 3.995  | 3.982  | 4.055  | 4.168  | 4.118  | 66294  | FAM3A    | NM_025473_X_-1  |
| Mrps14        | 7.619  | 7.656  | 7.255  | 7.223  | 6.992  | 7.046  | 7.218  | 6.949  | 6.105  | 6.041  | 64659  | MRPS14   | NM_025474_1_+1  |
| Haus2         | 4.259  | 3.053  | 3.991  | 3.929  | 3.854  | 3.055  | 3.977  | 3.728  | 4.075  | 4.240  | 66296  | HAUS2    | NM_025475_2_+1  |
| Rmdn1         | 5.233  | 5.231  | 5.015  | 4.724  | 4.157  | 4.434  | 4.311  | 4.096  | 3.787  | 3.759  | 66302  | RMDN1    | NM_025476_4_+1  |
| Isoc1         | 5.459  | 6.572  | 7.258  | 7.594  | 6.518  | 6.203  | 6.587  | 6.741  | 6.558  | 6.840  | 66307  | ISOC1    | NM_025478_18_+1 |
| Mplkip        | 6.376  | 6.135  | 5.708  | 5.833  | 5.645  | 5.880  | 5.625  | 5.579  | 4.822  | 5.277  | 66308  | MPLKIP   | NM_025479_13_+1 |
| Tmem128       | 7.035  | 6.991  | 6.572  | 6.316  | 6.235  | 6.165  | 6.069  | 5.971  | 5.665  | 5.568  | 66309  | TMEM128  | NM_025480_5_+1  |
| Smurf2        | 3.411  | 3.566  | 3.870  | 3.722  | 4.272  | 4.029  | 4.354  | 4.295  | 4.635  | 4.769  | 66313  | SMURF2   | NM_025481_11_-1 |
| Tpd52l2       | 4.038  | 3.772  | 2.984  | 3.125  | 3.192  | 3.564  | 3.284  | 3.247  | 2.301  | 2.553  | 66314  | TPD52L2  | NM_025482_2_+1  |
| Senp7         | 4.036  | 4.191  | 3.667  | 3.592  | 4.196  | 4.280  | 4.100  | 4.112  | 3.858  | 4.406  | 66315  | SENP7    | NM_025483_16_+1 |
| Mrps22        | 4.368  | 4.351  | 3.619  | 4.014  | 4.043  | 3.876  | 3.886  | 3.773  | 3.215  | 3.369  | 64655  | MRPS22   | NM_025485_9_-1  |
| Tmem208       | 6.753  | 6.798  | 5.723  | 5.807  | 5.723  | 5.969  | 5.955  | 6.092  | 5.192  | 5.455  | 66320  | TMEM208  | NM_025486_8_+1  |
| 1700001K19Rik | -3.090 | -3.408 | -3.133 | -4.870 | -3.737 | -4.835 | -4.400 | -4.874 | -4.394 | -4.981 | 66323  | NA       | NM_025488_12_-1 |
| Susd3         | 5.629  | 5.715  | 5.877  | 5.643  | 6.819  | 6.858  | 7.229  | 6.943  | 7.441  | 7.175  | 66329  | SUSD3    | NM_025491_13_-1 |
| 1700020L24Rik | -1.636 | -0.972 | -1.045 | -1.495 | -1.669 | -2.699 | -0.660 | -0.730 | 1.423  | 0.546  | 66330  | C17orf50 | NM_025492_11_+1 |
| Atp6v1c1      | 7.082  | 6.968  | 6.578  | 6.620  | 6.599  | 6.665  | 6.382  | 6.364  | 6.178  | 6.348  | 66335  | ATP6V1C1 | NM_025494_15_+1 |
| Cenpp         | 0.729  | 1.308  | 2.259  | 2.282  | 2.307  | 2.253  | 1.839  | 1.739  | -0.152 | -0.044 | 66336  | CENPP    | NM_025495_13_-1 |
| Psenen        | 7.483  | 7.491  | 6.639  | 6.594  | 6.844  | 7.069  | 7.373  | 7.262  | 6.552  | 6.544  | 66340  | PSENEEN  | NM_025498_7_-1  |
| Eid3          | -2.759 | -4.981 | -2.290 | -1.335 | 0.423  | 0.059  | -1.096 | -1.338 | -2.953 | -1.521 | 66341  | EID3     | NM_025499_10_+1 |
| Mrpl37        | 6.529  | 6.479  | 5.592  | 5.843  | 5.455  | 5.496  | 5.177  | 5.533  | 5.227  | 5.225  | 56280  | MRPL37   | NM_025500_4_-1  |
| Atp5sl        | 4.313  | 0.838  | 3.307  | 0.602  | 4.453  | 2.200  | 4.623  | 1.111  | 4.207  | 0.920  | 66349  | ATP5SL   | NM_025504_7_+1  |
| Blzf1         | 0.439  | -3.847 | 0.345  | -4.583 | 1.328  | -1.966 | 0.359  | -4.799 | 0.946  | -4.731 | 66352  | BLZF1    | NM_025505_1_-1  |
| Rliad1        | -3.563 | -4.981 | -4.903 | -4.371 | -4.534 | -3.949 | -4.809 | -3.714 | -2.871 | -3.229 | 66353  | RIAD1    | NM_025506_3_-1  |
| Snw1          | 7.347  | 7.348  | 6.995  | 6.856  | 7.160  | 6.961  | 7.092  | 6.849  | 6.889  | 6.696  | 66354  | SNW1     | NM_025507_12_-1 |
| Gmpr          | -2.134 | -0.834 | -1.240 | 0.188  | -1.663 | 0.232  | -0.678 | 0.199  | 0.503  | 0.814  | 66355  | GMPR     | NM_025508_13_+1 |
| Ostc          | 8.290  | 8.346  | 7.580  | 7.616  | 7.122  | 6.939  | 6.951  | 7.227  | 6.662  | 6.739  | 66357  | OSTC     | NM_025509_3_-1  |
| Adprm         | 5.049  | 5.208  | 3.929  | 3.980  | 3.978  | 4.052  | 4.320  | 4.392  | 4.550  | 4.967  | 66358  | ADPRM    | NM_025510_11_-1 |
| Cox20         | 6.333  | 6.295  | 5.311  | 5.483  | 5.249  | 5.187  | 5.689  | 5.252  | 4.191  | 4.225  | 66359  | COX20    | NM_025511_1_+1  |
| Zfand1        | 4.978  | 5.202  | 4.208  | 4.332  | 4.396  | 4.487  | 4.320  | 3.824  | 3.380  | 3.949  | 66361  | ZFAND1   | NM_025512_3_-1  |
| Exosc3        | 6.495  | 6.535  | 5.925  | 5.942  | 5.951  | 5.839  | 5.848  | 5.748  | 5.036  | 5.159  | 66362  | EXOSC3   | NM_025513_4_-1  |

|               |        |        |        |        |        |        |        |        |        |        |        |           |                 |
|---------------|--------|--------|--------|--------|--------|--------|--------|--------|--------|--------|--------|-----------|-----------------|
| Anapc16       | 6.360  | 6.370  | 5.674  | 5.478  | 6.429  | 6.192  | 6.392  | 6.066  | 5.379  | 5.273  | 52717  | ANAPC16   | NM_025514_10_-1 |
| Ccdc90b       | 5.411  | 5.713  | 4.970  | 5.373  | 4.044  | 4.510  | 4.042  | 4.677  | 3.003  | 4.070  | 66365  | CCDC90B   | NM_025515_7_+1  |
| Ergic3        | 7.659  | 7.907  | 6.459  | 6.628  | 6.116  | 6.552  | 6.346  | 6.760  | 6.558  | 6.648  | 66366  | ERGIC3    | NM_025516_2_+1  |
| Rtca          | 5.591  | 6.181  | 6.281  | 6.487  | 5.355  | 5.548  | 5.252  | 5.456  | 4.855  | 5.186  | 66368  | RTCA      | NM_025517_3_-1  |
| Dus2          | 3.818  | 3.175  | 2.407  | 2.868  | 3.208  | 3.264  | 2.961  | 3.084  | 2.237  | 1.896  | 66369  | DUS2      | NM_025518_8_+1  |
| Chmp4c        | -4.981 | -2.997 | -4.994 | -3.314 | -4.043 | -3.567 | -4.815 | -4.466 | -4.190 | -4.981 | 66371  | CHMP4C    | NM_025519_3_+1  |
| Lsm5          | 6.126  | 5.853  | 5.375  | 5.236  | 5.514  | 5.302  | 5.975  | 5.301  | 4.283  | 4.260  | 66373  | LSM5      | NM_025520_6_-1  |
| 2310011J03Rik | 5.918  | 5.928  | 5.728  | 5.770  | 5.860  | 5.700  | 5.734  | 5.717  | 5.595  | 5.331  | 66374  | C19orf25  | NM_025521_10_-1 |
| Dhrs7         | 7.202  | 6.917  | 5.654  | 5.663  | 5.859  | 6.125  | 5.880  | 5.940  | 6.484  | 6.031  | 66375  | DHR57     | NM_025522_12_-1 |
| Ndufc1        | 6.653  | 6.282  | 6.158  | 6.075  | 5.720  | 5.697  | 6.138  | 5.806  | 4.980  | 4.926  | 66377  | NDUFC1    | NM_025523_3_-1  |
| Rnf113a2      | 6.700  | 6.704  | 5.341  | 5.302  | 5.494  | 5.439  | 5.324  | 5.254  | 4.828  | 5.072  | 66381  | RNF113A   | NM_025525_12_+1 |
| Iscu          | 7.744  | 7.437  | 8.306  | 8.302  | 8.334  | 8.333  | 8.365  | 7.782  | 7.504  | 6.985  | 66383  | ISCU      | NM_025526_5_+1  |
| Srp19         | 7.891  | 7.750  | 6.792  | 6.901  | 6.597  | 6.773  | 6.715  | 6.741  | 5.848  | 6.245  | 66384  | SRP19     | NM_025527_18_+1 |
| Nudt8         | 5.055  | 5.142  | 5.258  | 5.264  | 5.050  | 5.461  | 4.790  | 4.600  | 3.122  | 2.955  | 66387  | NUDT8     | NM_025529_19_+1 |
| Cutc          | 1.618  | 1.892  | 1.534  | 1.094  | 1.113  | 0.453  | 1.547  | 1.171  | 1.555  | 1.023  | 66388  | CUTC      | NM_025530_19_+1 |
| Slmo2         | 6.283  | 6.060  | 6.667  | 6.196  | 6.397  | 5.880  | 6.176  | 5.698  | 5.727  | 5.137  | 66390  | PRELID3B  | NM_025531_2_-1  |
| Nosip         | 6.469  | 6.332  | 5.549  | 5.448  | 6.038  | 6.012  | 6.246  | 5.775  | 5.962  | 5.569  | 66394  | NOSIP     | NM_025533_7_+1  |
| Ccdc82        | 5.480  | 5.695  | 4.634  | 4.293  | 4.909  | 4.834  | 5.116  | 4.563  | 4.421  | 4.581  | 66396  | CCDC82    | NM_025534_9_+1  |
| Sar1b         | 7.221  | 7.148  | 6.568  | 6.708  | 6.458  | 6.471  | 6.437  | 6.434  | 5.951  | 6.049  | 66397  | SAR1B     | NM_025535_11_+1 |
| Commmd5       | 5.256  | 5.344  | 4.314  | 4.498  | 4.112  | 4.353  | 3.874  | 4.050  | 3.924  | 3.850  | 66398  | COMMMD5   | NM_025536_15_+1 |
| Tsfm          | 5.059  | 5.213  | 4.595  | 4.830  | 4.457  | 4.524  | 4.322  | 4.317  | 3.410  | 3.450  | 66399  | TSFM      | NM_025537_10_-1 |
| Alkbh7        | 5.373  | 5.397  | 4.589  | 4.370  | 4.441  | 4.552  | 4.449  | 4.228  | 3.265  | 2.483  | 66400  | ALKBH7    | NM_025538_17_+1 |
| Nudt2         | 5.365  | 5.565  | 4.717  | 4.745  | 3.611  | 3.941  | 3.626  | 3.956  | 2.288  | 2.956  | 66401  | NUDT2     | NM_025539_4_+1  |
| Asf1a         | 6.301  | 6.311  | 4.973  | 5.261  | 5.561  | 5.520  | 5.071  | 5.021  | 3.639  | 3.892  | 66403  | ASF1A     | NM_025541_10_+1 |
| Rtfdc1        | 7.331  | 7.274  | 6.863  | 7.001  | 7.190  | 7.158  | 7.276  | 7.235  | 7.494  | 7.209  | 66404  | RTFDC1    | NM_025542_2_+1  |
| Mcts2         | 0.557  | 1.489  | 1.043  | 0.426  | 0.420  | -0.893 | 0.484  | 0.036  | -0.102 | 0.543  | 66405  | NA        | NM_025543_2_+1  |
| Mrps15        | 6.901  | 6.659  | 6.368  | 6.549  | 6.181  | 6.098  | 6.202  | 6.063  | 5.165  | 5.020  | 66407  | MRPS15    | NM_025544_4_+1  |
| Aptx          | 3.544  | 1.870  | 2.484  | 2.525  | 2.116  | 2.671  | 0.999  | 0.682  | -0.394 | -1.039 | 66408  | APTX      | NM_025545_4_-1  |
| Rsl1d1        | 6.817  | 6.801  | 6.748  | 6.879  | 6.666  | 6.637  | 6.613  | 6.546  | 5.856  | 5.701  | 66409  | RSL1D1    | NM_025546_16_-1 |
| Mterf3        | 5.665  | 5.538  | 5.342  | 5.216  | 4.858  | 5.038  | 4.976  | 5.029  | 4.921  | 5.254  | 66410  | MTERF3    | NM_025547_13_-1 |
| Tbcb          | 7.797  | 7.831  | 7.011  | 7.141  | 6.608  | 6.968  | 6.714  | 6.766  | 5.869  | 5.928  | 66411  | TBCB      | NM_025548_7_-1  |
| Arrdc4        | 5.626  | 5.621  | 4.947  | 4.846  | 4.710  | 4.599  | 4.643  | 4.303  | 4.737  | 3.763  | 66412  | ARRDC4    | NM_025549_7_-1  |
| Psmdd6        | 6.973  | 6.974  | 6.767  | 7.046  | 6.608  | 6.580  | 6.542  | 6.676  | 6.439  | 6.448  | 66413  | PSMD6     | NM_025550_14_-1 |
| Ndufa12       | 6.889  | 6.876  | 6.480  | 6.653  | 5.759  | 5.997  | 6.202  | 6.276  | 4.785  | 4.529  | 66414  | NDUFA12   | NM_025551_10_+1 |
| Mrpl11        | 6.117  | 5.727  | 5.447  | 5.393  | 5.640  | 5.671  | 5.524  | 5.251  | 4.426  | 4.099  | 66419  | MRPL11    | NM_025553_19_+1 |
| Polr2e        | 7.156  | 7.194  | 7.124  | 6.952  | 6.897  | 7.063  | 7.373  | 7.300  | 6.946  | 6.661  | 66420  | POLR2E    | NM_025554_10_-1 |
| 2410004B18Rik | 4.489  | 4.429  | 4.219  | 4.137  | 4.200  | 4.117  | 4.009  | 3.964  | 3.740  | 3.571  | 66421  | C1orf52   | NM_025555_3_+1  |
| Coprs         | -0.567 | -1.991 | 2.826  | 3.281  | 1.311  | 1.697  | 1.987  | 2.499  | 1.669  | 2.087  | 66423  | COPRS     | NM_025556_8_-1  |
| Pcp4l1        | -2.948 | -4.981 | -4.335 | -2.967 | -3.706 | -3.188 | -2.591 | -2.886 | -1.778 | -2.867 | 66425  | NA        | NM_025557_1_-1  |
| Cyb5b         | 6.664  | 6.770  | 6.529  | 6.216  | 6.451  | 6.310  | 6.382  | 6.265  | 6.498  | 6.377  | 66427  | CYB5B     | NM_025558_8_+1  |
| Mien1         | 7.593  | 7.600  | 6.433  | 6.570  | 6.361  | 6.626  | 6.532  | 6.600  | 5.869  | 5.754  | 103742 | MIEN1     | NM_025559_11_-1 |
| Oxld1         | 4.074  | 3.831  | 3.322  | 3.287  | 2.881  | 3.000  | 2.940  | 2.877  | 2.305  | 2.134  | 66431  | OXLD1     | NM_025560_11_-1 |
| Fis1          | 8.519  | 8.536  | 7.444  | 7.497  | 7.850  | 8.000  | 7.949  | 7.829  | 7.642  | 7.400  | 66437  | FIS1      | NM_025562_5_+1  |
| Borcs7        | 5.338  | 4.880  | 4.852  | 4.696  | 4.595  | 4.522  | 4.906  | 4.535  | 4.274  | 4.242  | 66439  | BORCS7    | NM_025563_19_+1 |
| Magohb        | 4.689  | 4.206  | 4.300  | 3.897  | 4.245  | 4.164  | 4.577  | 3.936  | 3.761  | 3.928  | 66441  | MAGOHB    | NM_025564_6_-1  |
| Spc25         | -2.808 | -3.679 | -4.310 | -4.809 | -4.824 | -2.937 | -4.663 | -4.570 | -4.600 | -2.133 | 66442  | SPC25     | NM_025565_2_-1  |
| Tnfaip8l1     | 0.130  | 0.493  | 0.870  | 1.409  | 1.642  | 1.496  | 1.301  | 1.322  | -0.069 | 0.773  | 66443  | TNFAIP8L1 | NM_025566_17_+1 |
| Cyc1          | 7.738  | 7.623  | 7.144  | 7.329  | 7.241  | 7.276  | 7.002  | 7.209  | 6.937  | 6.718  | 66445  | CYC1      | NM_025567_15_+1 |
| Mgst3         | 4.207  | 4.643  | 3.025  | 4.361  | 2.182  | 4.597  | 3.423  | 5.167  | 3.995  | 4.138  | 66447  | MGST3     | NM_025569_1_-1  |
| Mrpl20        | 6.815  | 6.358  | 6.315  | 6.161  | 6.160  | 6.052  | 6.428  | 6.061  | 5.824  | 5.423  | 66448  | MRPL20    | NM_025570_4_+1  |
| Pam16         | 6.034  | 5.986  | 4.756  | 4.862  | 4.966  | 5.122  | 5.226  | 4.765  | 3.827  | 3.736  | 66449  | PAM16     | NM_025571_16_-1 |
| Srsf9         | 7.828  | 8.048  | 7.616  | 8.022  | 7.710  | 7.941  | 7.499  | 7.741  | 7.360  | 7.446  | 108014 | SRSF9     | NM_025573_5_+1  |
| Pyurf         | 5.773  | 5.731  | 5.392  | 5.300  | 4.988  | 5.189  | 5.523  | 5.337  | 4.296  | 4.423  | 66459  | PYURF     | NM_025574_6_-1  |
| Sys1          | 7.455  | 7.512  | 6.386  | 6.260  | 6.483  | 6.589  | 6.514  | 6.486  | 6.440  | 6.284  | 66460  | SYS1      | NM_025575_2_+1  |
| Ptpmt1        | 5.530  | 5.428  | 5.378  | 5.388  | 4.783  | 5.125  | 4.927  | 4.855  | 4.423  | 4.182  | 66461  | PTPMT1    | NM_025576_2_-1  |
| 2810428I15Rik | 6.031  | 5.825  | 5.667  | 5.769  | 5.398  | 5.400  | 5.923  | 5.597  | 4.823  | 4.661  | 66462  | C19orf60  | NM_025577_8_-1  |
| Mrps25        | 5.693  | 5.831  | 5.456  | 5.635  | 5.441  | 5.699  | 5.678  | 5.607  | 4.700  | 5.101  | 64658  | MRPS25    | NM_025578_6_-1  |
| Taf12         | 5.785  | 5.958  | 5.664  | 5.744  | 5.577  | 5.615  | 5.546  | 5.623  | 5.029  | 5.235  | 66464  | TAF12     | NM_025579_4_+1  |
| Pnkd          | 5.774  | 5.591  | 4.731  | 4.700  | 4.899  | 4.937  | 5.194  | 4.677  | 3.996  | 3.967  | 56695  | PNKD      | NM_025580_1_+1  |
| Ska1          | -4.934 | -0.480 | -4.561 | 1.963  | -4.809 | 1.929  | -3.594 | 1.538  | -4.307 | -0.404 | 66468  | SKA1      | NM_025581_18_-1 |
| Fam213b       | 4.421  | 4.392  | 3.528  | 3.637  | 4.088  | 3.752  | 4.690  | 4.457  | 3.654  | 3.559  | 66469  | FAM213B   | NM_025582_4_-1  |
| Rpl15         | 9.513  | 9.453  | 9.717  | 9.703  | 9.443  | 9.442  | 9.600  | 9.552  | 8.555  | 8.500  | 66480  | RPL15     | NM_025586_14_-1 |
| Rps21         | 7.185  | 6.930  | 7.725  | 7.498  | 7.534  | 7.391  | 7.865  | 7.394  | 6.367  | 5.986  | 66481  | RPS21     | NM_025587_2_+1  |
| Exoc2         | 4.974  | 5.024  | 5.850  | 5.638  | 5.674  | 5.569  | 5.858  | 5.733  | 6.501  | 6.548  | 66482  | EXOC2     | NM_025588_13_-1 |
| Rpl36al       | 9.484  | 9.049  | 8.830  | 8.597  | 8.007  | 7.894  | 8.463  | 8.397  | 7.891  | 7.562  | 66483  | RPL36AL   | NM_025589_12_-1 |
| Acot11        | 2.702  | 2.130  | 2.598  | 1.967  | 2.548  | 1.978  | 2.581  | 2.362  | 3.933  | 3.563  | 329910 | ACOT11    | NM_025590_4_-1  |
| Fam136a       | 5.549  | 5.375  | 5.064  | 5.195  | 4.648  | 4.822  | 4.700  | 4.639  | 3.484  | 3.443  | 66488  | FAM136A   | NM_025591_6_+1  |
| Rpl35         | 9.345  | 9.144  | 9.516  | 9.485  | 9.337  | 9.210  | 9.784  | 9.526  | 8.604  | 8.306  | 66489  | RPL35     | NM_025592_2_-1  |
| Polr2l        | 6.516  | 6.326  | 6.685  | 6.621  | 6.243  | 6.375  | 6.533  | 6.405  | 5.239  | 4.837  | 66491  | POLR2L    | NM_025593_7_-1  |
| Zmat2         | 6.871  | 6.857  | 6.355  | 6.659  | 6.503  | 6.540  | 6.334  | 6.309  | 5.435  | 5.292  | 66492  | ZMAT2     | NM_025594_18_+1 |
| Mrpl51        | 6.776  | 6.534  | 6.230  | 6.356  | 6.001  | 5.945  | 6.209  | 5.927  | 4.759  | 4.758  | 66493  | MRPL51    | NM_025595_6_+1  |
| Preli1d1      | 8.368  | 8.268  | 8.020  | 8.063  | 8.002  | 7.932  | 7.707  | 7.850  | 8.108  | 7.933  | 66494  | PRELID1   | NM_025596_13_+1 |
| Ndufb3        | 7.463  | 7.340  | 6.836  | 6.657  | 6.833  | 6.828  | 7.256  | 6.864  | 6.300  | 6.200  | 66495  | NDUFB3    | NM_025597_1_+1  |
| Pdpdf         | 7.971  | 8.034  | 5.886  | 5.865  | 7.948  | 8.050  | 7.146  | 6.707  | 6.006  | 5.172  | 66496  | PPDPF     | NM_025598_2_+1  |

|               |        |        |        |        |        |        |        |        |        |        |        |           |                 |
|---------------|--------|--------|--------|--------|--------|--------|--------|--------|--------|--------|--------|-----------|-----------------|
| Cmss1         | 2.594  | 2.664  | 0.373  | 1.127  | 1.788  | 0.729  | 1.223  | 1.563  | 0.182  | 0.186  | 66497  | CMSS1     | NM_025599_16_-1 |
| Dda1          | 6.749  | 6.768  | 6.189  | 6.291  | 6.516  | 6.603  | 6.390  | 6.280  | 5.989  | 5.870  | 66498  | DDA1      | NM_025600_8_+1  |
| Ccdc59        | 5.728  | 5.694  | 4.996  | 4.930  | 5.280  | 5.271  | 5.333  | 5.082  | 4.466  | 4.361  | 52713  | CCDC59    | NM_025602_10_+1 |
| Psmg3         | 5.638  | 5.430  | 5.201  | 5.060  | 4.727  | 4.973  | 4.957  | 4.856  | 4.137  | 3.975  | 66506  | PSMG3     | NM_025604_5_-1  |
| Lamtor1       | 7.131  | 7.047  | 7.019  | 7.108  | 7.014  | 7.059  | 7.144  | 6.954  | 6.957  | 6.487  | 66508  | LAMTOR1   | NM_025605_7_+1  |
| Mrpl16        | 5.847  | 4.919  | 5.452  | 5.088  | 5.158  | 4.810  | 5.192  | 4.677  | 4.359  | 3.850  | 94063  | MRPL16    | NM_025606_19_+1 |
| Rnf181        | 7.226  | 6.831  | 6.901  | 6.641  | 7.208  | 6.824  | 6.933  | 6.449  | 6.135  | 5.848  | 66510  | RNF181    | NM_025607_6_-1  |
| Tab1          | 2.627  | 3.121  | 3.565  | 3.646  | 3.762  | 3.658  | 3.550  | 3.675  | 4.510  | 3.957  | 66513  | TAB1      | NM_025609_15_+1 |
| Asrgl1        | 4.636  | 4.418  | 4.600  | 4.946  | 5.415  | 5.268  | 5.204  | 5.142  | 3.939  | 4.111  | 66514  | ASRGL1    | NM_025610_19_-1 |
| Cul7          | 2.443  | 2.674  | 2.433  | 2.620  | 2.128  | 2.610  | 1.988  | 1.764  | 1.326  | 2.174  | 66515  | CUL7      | NM_025611_17_-1 |
| Eid1          | 7.588  | 7.811  | 7.083  | 7.085  | 6.521  | 6.612  | 6.579  | 6.526  | 5.621  | 6.415  | 58521  | EID1      | NM_025613_2_+1  |
| Rwdd1         | 6.815  | 6.702  | 6.488  | 6.370  | 6.190  | 6.103  | 6.334  | 6.111  | 5.715  | 5.520  | 66521  | RWDD1     | NM_025614_10_-1 |
| 2810004N23Rik | 4.042  | 3.767  | 4.596  | 4.760  | 4.257  | 4.350  | 4.431  | 4.546  | 3.656  | 3.830  | 66523  | C1orf131  | NM_025615_8_-1  |
| Timm50        | 6.050  | 5.973  | 5.585  | 5.675  | 5.542  | 5.598  | 5.437  | 5.518  | 4.854  | 4.491  | 66525  | TIMM50    | NM_025616_7_-1  |
| Tceanc2       | 4.737  | 4.718  | 4.684  | 4.772  | 4.419  | 4.598  | 4.542  | 4.244  | 4.331  | 4.261  | 66526  | TCEANC2   | NM_025617_4_-1  |
| Sri           | -0.915 | 0.000  | -0.806 | -2.495 | -3.321 | -3.960 | -2.882 | -1.733 | -0.766 | -1.609 | 109552 | SRI       | NM_025618_5_+1  |
| Cfap157       | -4.981 | -4.981 | -4.935 | -4.268 | -4.981 | -4.981 | -4.981 | -4.981 | -4.981 | -4.981 | 227736 | CFAP157   | NM_025619_2_-1  |
| Rep15         | -4.981 | -1.499 | -1.565 | -2.765 | -4.847 | -3.806 | -3.615 | -3.583 | -4.981 | -4.981 | 66532  | REP15     | NM_025620_6_+1  |
| Lgals2        | -4.981 | -4.981 | -4.221 | -4.952 | -2.597 | -4.655 | -3.649 | -4.894 | -2.712 | -4.316 | 107753 | LGALS2    | NM_025622_15_-1 |
| Nipsnap3b     | 6.755  | 6.829  | 6.322  | 6.489  | 5.878  | 6.018  | 5.950  | 6.185  | 5.822  | 6.070  | 66536  | NIPSNAP3A | NM_025623_4_+1  |
| Pomp          | 8.826  | 8.683  | 9.287  | 9.295  | 8.330  | 8.243  | 8.565  | 8.532  | 7.832  | 7.596  | 66537  | POMP      | NM_025624_5_+1  |
| Fam107b       | 7.525  | 7.533  | 6.467  | 6.612  | 9.005  | 8.997  | 8.397  | 8.313  | 8.678  | 8.933  | 66540  | FAM107B   | NM_025626_2_+1  |
| Cox6b1        | 8.398  | 8.305  | 8.145  | 8.184  | 8.294  | 8.246  | 8.460  | 8.404  | 7.715  | 7.448  | 110323 | COX6B1    | NM_025628_7_-1  |
| Aggf1         | 5.351  | 5.159  | 5.530  | 5.625  | 5.379  | 5.458  | 5.503  | 5.498  | 5.844  | 5.918  | 66549  | AGGF1     | NM_025630_13_-1 |
| Bpifb2        | -4.981 | -4.981 | -4.967 | -3.326 | -4.947 | -3.212 | -4.981 | -4.981 | -4.981 | -4.981 | 66557  | BPIFB2    | NM_025631_2_+1  |
| Metap1d       | 3.822  | 2.367  | 2.971  | 1.462  | 2.881  | 1.977  | 2.479  | 2.044  | 3.732  | 1.912  | 66559  | METAP1D   | NM_025633_2_+1  |
| Teddm3        | -4.981 | -4.981 | -1.836 | -2.590 | -1.650 | -1.861 | -2.876 | -2.968 | -4.981 | -4.981 | 66561  | NA        | NM_025634_16_-1 |
| Zwint         | 1.559  | 2.294  | 1.393  | 1.357  | 1.421  | 1.617  | 1.277  | 1.169  | 0.824  | 1.010  | 52696  | ZWINT     | NM_025635_10_+1 |
| Ntpcr         | 5.969  | 6.009  | 3.941  | 4.027  | 4.208  | 4.106  | 4.347  | 4.533  | 4.876  | 4.804  | 66566  | NTPCR     | NM_025636_8_+1  |
| Rwdd3         | -1.580 | -1.101 | -4.822 | -2.902 | -2.715 | -2.842 | -1.718 | -3.936 | -1.346 | -2.138 | 66568  | RWDD3     | NM_025637_3_-1  |
| Gdpd1         | 3.425  | 2.710  | 0.512  | 0.522  | 0.440  | -0.277 | -0.123 | 1.339  | -1.032 | -0.816 | 66569  | GDPD1     | NM_025638_11_-1 |
| Cenpm         | 1.001  | 0.881  | 2.846  | 2.976  | 3.147  | 2.621  | 2.338  | 1.892  | -0.778 | -0.615 | 66570  | CENPM     | NM_025639_15_-1 |
| Uqcrh         | 8.086  | 7.809  | 7.550  | 7.443  | 7.576  | 7.419  | 7.881  | 7.593  | 7.032  | 6.850  | 66576  | UQCRLH    | NM_025641_4_-1  |
| Mis18a        | 5.138  | 5.148  | 4.619  | 4.458  | 5.147  | 4.976  | 5.085  | 4.919  | 4.941  | 4.643  | 66578  | MIS18A    | NM_025642_16_-1 |
| Exosc1        | 5.430  | 5.578  | 5.038  | 4.891  | 4.986  | 4.889  | 5.008  | 4.997  | 4.233  | 4.188  | 66583  | EXOSC1    | NM_025644_19_-1 |
| Snrnp40       | 6.599  | 6.544  | 6.182  | 6.293  | 6.602  | 6.416  | 6.280  | 6.261  | 5.721  | 5.516  | 66585  | SNRNP40   | NM_025645_4_+1  |
| Crls1         | 0.092  | 1.034  | -2.219 | -1.096 | -4.724 | -3.440 | -2.383 | -4.009 | -0.478 | -4.164 | 66586  | CRLS1     | NM_025646_2_+1  |
| Cmpk1         | 7.133  | 7.240  | 7.293  | 7.221  | 7.056  | 6.839  | 7.598  | 7.510  | 8.045  | 8.414  | 66588  | CMPK1     | NM_025647_4_-1  |
| Farsa         | 5.670  | 6.253  | 5.782  | 6.158  | 5.340  | 5.732  | 5.458  | 6.156  | 5.512  | 5.760  | 66590  | FARSA     | NM_025648_8_+1  |
| Mad2l1bp      | 4.738  | 4.640  | 3.881  | 3.872  | 3.895  | 3.599  | 4.061  | 3.833  | 4.137  | 3.815  | 66591  | MAD2L1BP  | NM_025649_17_-1 |
| Uqcr11        | 8.221  | 8.052  | 7.354  | 7.378  | 7.058  | 7.198  | 7.480  | 7.385  | 6.847  | 6.442  | 66594  | UQCR11    | NM_025650_10_-1 |
| Aste1         | 2.626  | 2.746  | 2.487  | 1.850  | 2.352  | 2.203  | 2.267  | 2.218  | 3.075  | 2.307  | 66595  | ASTE1     | NM_025651_9_+1  |
| Gtf3a         | 6.712  | 6.744  | 5.667  | 5.771  | 5.632  | 5.659  | 5.633  | 5.716  | 5.304  | 5.188  | 66596  | GTF3A     | NM_025652_5_+1  |
| Bfar          | 3.250  | 2.722  | 3.512  | 3.468  | 3.270  | 3.647  | 3.289  | 3.080  | 2.820  | 3.005  | 67118  | BFAR      | NM_025653_16_+1 |
| Rdm1          | 4.999  | 4.669  | 4.059  | 4.204  | 4.605  | 4.568  | 4.514  | 4.372  | 3.040  | 3.388  | 66599  | RDM1      | NM_025654_11_+1 |
| Gemin2        | 3.923  | 3.870  | 2.786  | 3.183  | 3.768  | 3.719  | 3.480  | 3.333  | 3.188  | 2.816  | 66603  | GEMIN2    | NM_025656_12_+1 |
| Lrrc57        | 2.285  | 1.638  | 1.585  | 1.705  | 2.841  | 0.977  | 2.291  | 0.120  | 1.870  | 0.079  | 66606  | LRRC57    | NM_025657_2_-1  |
| Ms4a4d        | -4.981 | -4.981 | -4.938 | -4.938 | -4.735 | -3.686 | -4.519 | -4.255 | -4.053 | -4.179 | 66607  | NA        | NM_025658_19_+1 |
| Abi3          | 6.786  | 6.714  | 4.060  | 4.311  | 7.432  | 7.498  | 7.740  | 7.737  | 7.927  | 7.686  | 66610  | ABI3      | NM_025659_11_-1 |
| Ribc1         | 2.726  | 2.013  | 0.793  | 0.820  | 0.197  | 0.184  | 0.039  | -0.814 | -0.338 | -0.222 | 66611  | RIBC1     | NM_025660_X_-1  |
| Ormdl3        | 5.138  | 5.254  | 3.969  | 4.179  | 4.197  | 4.556  | 4.258  | 4.738  | 4.529  | 4.500  | 66612  | ORMDL3    | NM_025661_11_-1 |
| Pigk          | 5.866  | 5.968  | 5.501  | 5.589  | 5.477  | 5.556  | 5.454  | 5.694  | 5.875  | 5.713  | 329777 | PIGK      | NM_025662_3_+1  |
| Gpatch4       | 1.672  | -2.143 | -0.970 | -1.166 | -3.127 | -1.865 | -2.698 | -2.001 | -2.014 | -4.967 | 66614  | GPATCH4   | NM_025663_3_+1  |
| Snx9          | 6.257  | 6.386  | 5.271  | 5.391  | 5.702  | 6.143  | 5.404  | 5.409  | 5.824  | 5.735  | 66616  | SNX9      | NM_025664_17_+1 |
| Snrnp27       | 6.835  | 6.950  | 5.805  | 5.972  | 5.998  | 6.158  | 5.888  | 5.760  | 4.711  | 4.838  | 66618  | SNRNP27   | NM_025665_6_-1  |
| Ubr7          | 4.122  | 4.464  | 4.340  | 4.373  | 4.676  | 4.497  | 4.645  | 4.407  | 4.386  | 4.327  | 66622  | UBR7      | NM_025666_12_+1 |
| Tmem222       | 6.470  | 6.526  | 5.666  | 5.880  | 5.873  | 5.739  | 5.791  | 5.606  | 5.201  | 5.158  | 52174  | TMEM222   | NM_025667_4_-1  |
| Spcs2         | 9.632  | 9.536  | 7.996  | 8.342  | 7.354  | 7.585  | 7.759  | 8.279  | 7.594  | 7.867  | 66624  | SPCS2     | NM_025668_7_-1  |
| Pnir          | 6.514  | 6.591  | 6.295  | 6.387  | 7.115  | 7.357  | 6.684  | 6.619  | 6.296  | 6.524  | 66625  | PNISR     | NM_025669_4_+1  |
| Cdip1         | 7.569  | 7.674  | 5.093  | 5.070  | 5.278  | 4.978  | 5.025  | 5.085  | 4.988  | 4.855  | 66626  | CDIP1     | NM_025670_16_-1 |
| Ogfod2        | 4.417  | 4.314  | 3.736  | 3.577  | 3.805  | 3.701  | 3.605  | 3.469  | 3.923  | 3.268  | 66627  | OGFOD2    | NM_025671_5_+1  |
| Golph3        | 6.109  | 6.374  | 7.145  | 7.345  | 6.081  | 6.120  | 6.368  | 6.488  | 6.812  | 7.133  | 66629  | GOLPH3    | NM_025673_15_+1 |
| Tcf19         | 3.141  | 2.537  | 4.138  | 3.722  | 3.931  | 3.112  | 3.416  | 2.750  | 1.883  | 1.889  | 106795 | TCF19     | NM_025674_17_-1 |
| Dph6          | 4.444  | 4.588  | 4.765  | 5.088  | 4.147  | 4.547  | 3.861  | 4.478  | 2.994  | 3.767  | 66632  | DPH6      | NM_025675_2_-1  |
| Mcm8          | -0.547 | -4.267 | -4.383 | -4.759 | -4.112 | -4.890 | -2.235 | -3.191 | -1.850 | -0.875 | 66634  | MCM8      | NM_025676_2_+1  |
| Tsen15        | 4.152  | 4.018  | 4.124  | 4.112  | 3.687  | 3.635  | 3.544  | 3.642  | 2.256  | 2.481  | 66637  | TSEN15    | NM_025677_1_-1  |
| Sike1         | 5.937  | 6.271  | 5.430  | 5.398  | 5.038  | 5.337  | 5.087  | 5.295  | 5.024  | 5.218  | 66641  | SIKE1     | NM_025679_3_+1  |
| Ctnnb1        | 7.342  | 7.070  | 5.713  | 5.983  | 5.994  | 6.052  | 5.944  | 6.159  | 6.121  | 5.973  | 66642  | CTNNB1    | NM_025680_2_+1  |
| Lix1          | 2.446  | 2.969  | -2.186 | -2.342 | -1.450 | -1.792 | -2.037 | -1.656 | -3.597 | -3.510 | 66643  | LIX1      | NM_025681_17_+1 |
| Pspc1         | 5.284  | 5.366  | 4.418  | 4.355  | 4.516  | 4.713  | 4.386  | 4.406  | 3.647  | 4.173  | 66645  | PSPC1     | NM_025682_14_-1 |
| Rpe           | 5.827  | 5.957  | 5.805  | 6.218  | 5.681  | 6.119  | 5.672  | 5.686  | 5.807  | 6.055  | 66646  | RPE       | NM_025683_1_+1  |
| Col27a1       | -3.563 | -2.895 | 2.750  | 3.942  | 2.267  | 1.845  | 2.909  | 2.544  | 0.066  | 1.407  | 373864 | COL27A1   | NM_025685_4_+1  |
| Brf2          | 2.611  | 2.598  | 2.344  | 2.502  | 2.641  | 2.633  | 2.102  | 2.071  | 2.584  | 2.342  | 66653  | BRF2      | NM_025686_8_-1  |
| Tex12         | -3.668 | -3.408 | -1.982 | -3.694 | -2.237 | -3.985 | -3.352 | -3.792 | -1.691 | -1.798 | 66654  | TEX12     | NM_025687_9_-1  |

|               |        |        |        |        |        |        |        |        |        |        |        |          |                 |
|---------------|--------|--------|--------|--------|--------|--------|--------|--------|--------|--------|--------|----------|-----------------|
| Ccdc51        | 3.838  | 3.732  | 3.258  | 3.216  | 3.434  | 3.335  | 3.459  | 2.810  | 2.579  | 2.254  | 66658  | CCDC51   | NM_025689_9_+1  |
| Sltm          | 6.009  | 6.141  | 6.072  | 5.809  | 5.977  | 5.872  | 5.801  | 5.570  | 5.152  | 5.243  | 66660  | SLTM     | NM_025690_9_+1  |
| Srp72         | 6.602  | 6.549  | 6.891  | 6.901  | 6.598  | 6.561  | 6.486  | 6.523  | 6.599  | 6.761  | 66661  | SRP72    | NM_025691_5_+1  |
| Uba5          | 6.642  | 6.585  | 5.997  | 6.034  | 5.909  | 5.945  | 5.679  | 5.841  | 5.474  | 5.821  | 66663  | UBA5     | NM_025692_9_-1  |
| Tmem41a       | 3.493  | 3.375  | 0.479  | 1.659  | 2.130  | 2.307  | 1.142  | 2.616  | 2.845  | 2.743  | 66664  | TMEM41A  | NM_025693_16_-1 |
| Smc6          | 7.901  | 7.926  | 6.596  | 6.322  | 7.046  | 7.143  | 7.346  | 6.936  | 6.281  | 5.903  | 67241  | SMC6     | NM_025695_12_+1 |
| Sorcs3        | -4.981 | -4.981 | -1.037 | -1.484 | -4.981 | -4.981 | -4.976 | -4.900 | -4.981 | -4.981 | 66673  | SORCS3   | NM_025696_19_+1 |
| Spryd7        | 4.820  | 5.140  | 4.210  | 4.154  | 4.117  | 4.106  | 4.027  | 3.987  | 3.079  | 3.237  | 66674  | SPRYD7   | NM_025697_14_-1 |
| Tmed7         | 6.892  | 7.039  | 7.092  | 7.132  | 6.907  | 7.009  | 7.099  | 7.229  | 7.832  | 8.345  | 66676  | TMED7    | NM_025698_18_-1 |
| Oser1         | 7.894  | 8.099  | 6.675  | 6.607  | 6.441  | 6.467  | 6.658  | 6.764  | 6.679  | 6.659  | 66680  | OSER1    | NM_025699_2_-1  |
| Pgm1          | 4.244  | 4.049  | 4.344  | 4.561  | 4.455  | 4.431  | 4.698  | 4.776  | 5.556  | 5.615  | 66681  | PGM2     | NM_025700_5_+1  |
| Trappc5       | 8.151  | 8.301  | 6.031  | 5.657  | 6.656  | 6.825  | 7.212  | 6.852  | 5.558  | 5.003  | 66682  | TRAPPC5  | NM_025701_8_+1  |
| Tceal8        | 5.682  | 5.977  | 2.658  | 3.927  | 3.152  | 4.178  | 3.712  | 4.415  | 3.266  | 4.288  | 66684  | TCEAL8   | NM_025703_X_-1  |
| Dcbl1         | -1.341 | -4.981 | -2.941 | -3.338 | -3.347 | -3.615 | -2.776 | -3.007 | -3.531 | -2.480 | 66686  | DCBLD1   | NM_025705_10_+1 |
| Tbc1d15       | 6.174  | 6.174  | 6.959  | 6.681  | 6.216  | 6.035  | 6.256  | 6.162  | 6.456  | 6.496  | 66687  | TBC1D15  | NM_025706_10_-1 |
| Klh28         | 3.523  | 3.990  | 3.798  | 3.883  | 3.861  | 3.793  | 3.536  | 3.897  | 3.762  | 3.759  | 66689  | KLHL28   | NM_025707_12_-1 |
| Tmem186       | 4.533  | 4.350  | 3.776  | 3.761  | 3.670  | 3.564  | 3.573  | 3.781  | 3.808  | 3.462  | 66690  | TMEM186  | NM_025708_16_-1 |
| Gapvd1        | 4.560  | 4.799  | 5.731  | 5.806  | 5.461  | 5.740  | 5.332  | 5.648  | 6.063  | 6.306  | 66691  | GAPVD1   | NM_025709_2_-1  |
| Uqcrf51       | 7.744  | 7.707  | 7.865  | 7.903  | 7.201  | 6.957  | 7.343  | 7.452  | 7.291  | 7.479  | 66694  | UQCRF51  | NM_025710_13_-1 |
| Aspn          | -3.815 | -3.013 | -4.269 | -4.862 | -4.683 | -4.703 | -4.905 | -4.979 | -4.981 | -4.981 | 66695  | ASPN     | NM_025711_13_+1 |
| Snx31         | -1.327 | -4.981 | -2.780 | -1.051 | -1.717 | -1.499 | -3.086 | -0.735 | -4.981 | -3.853 | 66696  | SNX31    | NM_025712_15_-1 |
| Odf2l         | 2.889  | 2.533  | 1.441  | 1.158  | 2.452  | 2.320  | 1.857  | 1.831  | 1.245  | 1.372  | 52184  | ODF2L    | NM_025714_3_+1  |
| Spryd4        | 3.452  | 3.660  | 3.616  | 3.879  | 3.026  | 3.043  | 3.001  | 3.439  | 3.550  | 3.739  | 66701  | SPRYD4   | NM_025716_10_-1 |
| Rbm4b         | 4.527  | 4.632  | 3.857  | 3.904  | 4.171  | 4.245  | 3.813  | 3.874  | 2.839  | 3.144  | 66704  | RBM4B    | NM_025717_19_+1 |
| Dnase1l2      | 0.232  | -0.750 | -0.397 | -1.720 | 0.486  | -1.957 | -0.405 | -2.007 | -0.206 | -2.131 | 66705  | DNASE1L2 | NM_025718_17_-1 |
| Nkapl         | -3.668 | -0.041 | -2.367 | -0.310 | -1.062 | 0.070  | -0.198 | 0.681  | -1.232 | 0.594  | 66707  | NKAPL    | NM_025719_13_-1 |
| 4921524J17Rik | 5.288  | 5.217  | 4.605  | 4.546  | 4.640  | 4.835  | 4.812  | 4.572  | 3.959  | 4.092  | 66714  | C16orf87 | NM_025722_8_-1  |
| Henmt1        | -4.981 | -4.876 | -4.875 | -4.955 | -4.976 | -4.976 | -4.953 | -4.731 | -4.977 | -4.981 | 66715  | HENMT1   | NM_025723_3_+1  |
| Ccdc96        | -1.363 | -2.587 | -2.054 | -1.965 | -0.602 | -2.230 | -2.708 | -2.182 | -2.149 | -1.674 | 66717  | CCDC96   | NM_025725_5_+1  |
| Klh10         | -1.694 | 0.300  | -1.423 | -1.052 | -1.837 | -1.755 | -4.235 | -3.096 | -3.531 | -4.981 | 66720  | KLHL10   | NM_025727_11_+1 |
| Tab3          | 2.767  | 2.512  | 2.790  | 2.630  | 2.925  | 3.088  | 3.151  | 2.279  | 3.273  | 3.647  | 66724  | TAB3     | NM_025729_X_+1  |
| Lrrk2         | 1.284  | 0.345  | 7.621  | 7.300  | 7.799  | 7.787  | 7.035  | 6.593  | 6.216  | 5.856  | 66725  | LRRK2    | NM_025730_15_+1 |
| Ankrd61       | -4.981 | -1.980 | -3.722 | -3.861 | -3.097 | -2.998 | -2.640 | -3.399 | -2.834 | -2.026 | 66729  | ANKRD61  | NM_025732_5_-1  |
| Map1lc3a      | 5.052  | 4.382  | 3.955  | 3.804  | 3.469  | 3.938  | 3.693  | 4.002  | 4.250  | 4.264  | 66734  | MAP1LC3A | NM_025735_2_+1  |
| Emc2          | 6.421  | 6.497  | 6.670  | 6.601  | 6.587  | 6.540  | 6.367  | 6.105  | 5.425  | 5.568  | 66736  | EMC2     | NM_025736_15_+1 |
| Rnf220        | 6.078  | 6.344  | 5.745  | 5.805  | 6.115  | 6.054  | 6.170  | 5.968  | 5.776  | 5.581  | 66743  | RNF220   | NM_025739_4_-1  |
| Cfap36        | 5.718  | 6.055  | 4.727  | 4.950  | 4.833  | 5.568  | 4.166  | 4.502  | 3.385  | 3.538  | 216618 | CFAP36   | NM_025740_11_-1 |
| Erlec1        | 3.900  | 4.918  | 3.490  | 4.441  | 3.269  | 4.469  | 3.444  | 4.558  | 3.122  | 4.679  | 66753  | ERLEC1   | NM_025745_11_-1 |
| Cfap97        | 4.554  | 4.660  | 4.638  | 4.587  | 4.560  | 4.613  | 4.456  | 4.087  | 3.692  | 4.187  | 66756  | CFAP97   | NM_025747_8_+1  |
| Adat2         | 2.246  | 2.376  | 2.349  | 2.335  | 1.882  | 2.089  | 2.245  | 2.248  | 1.461  | 1.404  | 66757  | ADAT2    | NM_025748_10_+1 |
| 4933425L06Rik | 0.074  | 1.171  | -4.972 | -4.972 | -4.981 | -4.981 | -4.970 | -4.734 | -4.981 | -4.981 | 66763  | NA       | NM_025751_13_+1 |
| 4933411K16Rik | -4.981 | -4.981 | -4.394 | -4.590 | -4.976 | -4.887 | -4.605 | -4.971 | -4.981 | -4.981 | 66765  | C10orf62 | NM_025752_19_+1 |
| Pacrgl        | 4.226  | 4.370  | 2.977  | 3.175  | 3.234  | 3.401  | 2.962  | 3.095  | 2.379  | 2.498  | 66768  | PACRGL   | NM_025755_5_+1  |
| Gid4          | 3.941  | 4.093  | 4.078  | 4.171  | 3.884  | 4.209  | 4.063  | 4.367  | 4.059  | 4.614  | 66771  | GID4     | NM_025757_11_+1 |
| Asb17         | -4.981 | -4.981 | -4.810 | -3.373 | -4.808 | -3.172 | -4.225 | -3.039 | -4.981 | -4.981 | 66772  | ASB17    | NM_025758_3_+1  |
| Hacd4         | 0.981  | -0.605 | 0.279  | 1.076  | 1.822  | 1.895  | 4.689  | 5.281  | 6.949  | 7.030  | 66775  | HACD4    | NM_025760_4_-1  |
| 4933434E20Rik | 6.538  | 6.532  | 5.764  | 5.826  | 5.747  | 6.024  | 5.718  | 5.802  | 5.323  | 5.368  | 99650  | C1orf43  | NM_025762_3_+1  |
| Grtp1         | -4.981 | -4.981 | -3.394 | -1.960 | -3.576 | -3.307 | -2.128 | -3.223 | -3.204 | -2.411 | 66790  | GRTP1    | NM_025768_8_-1  |
| Atg10         | 5.359  | 5.676  | 4.531  | 4.350  | 4.556  | 4.758  | 4.537  | 4.116  | 3.720  | 3.626  | 66795  | ATG10    | NM_025770_13_-1 |
| Cntnap2       | -4.981 | -4.981 | -4.975 | -4.870 | -1.534 | -3.464 | -4.772 | -4.975 | -4.981 | -4.981 | 66797  | CNTNAP2  | NM_025771_6_+1  |
| Dtnbp1        | 6.528  | 6.505  | 5.662  | 5.930  | 5.562  | 5.709  | 5.411  | 5.593  | 4.699  | 4.793  | 94245  | DTNBP1   | NM_025772_13_-1 |
| Ube2w         | 6.304  | 6.489  | 6.200  | 6.216  | 5.341  | 5.507  | 5.520  | 5.519  | 5.165  | 5.486  | 66799  | UBE2W    | NM_025773_1_-1  |
| Prkrip1       | 4.955  | 5.092  | 4.473  | 4.485  | 4.385  | 4.314  | 4.535  | 4.220  | 3.821  | 3.561  | 66801  | PRKRIP1  | NM_025774_5_-1  |
| Rbm22         | 5.150  | 4.877  | 5.396  | 5.140  | 5.441  | 5.212  | 5.684  | 5.268  | 5.764  | 5.469  | 66810  | RBM22    | NM_025776_18_+1 |
| Duoxa2        | -4.981 | -4.981 | -4.982 | -4.982 | -4.980 | -4.980 | -4.918 | -4.868 | -3.322 | -4.981 | 66811  | DUOXA2   | NM_025777_2_+1  |
| Bcl2l14       | 3.261  | 3.423  | 6.990  | 7.401  | 3.559  | 3.269  | 3.618  | 2.776  | 0.803  | 0.526  | 66813  | BCL2L14  | NM_025778_6_+1  |
| Ccdc109b      | 0.747  | -1.910 | 3.678  | -0.871 | 2.738  | 0.140  | 6.016  | 5.024  | 7.198  | 6.352  | 66815  | MCUB     | NM_025779_3_-1  |
| Thap2         | 2.753  | 2.622  | 2.344  | 2.638  | 3.000  | 2.457  | 2.169  | 1.811  | 1.071  | 1.800  | 66816  | THAP2    | NM_025780_10_-1 |
| Tmem170       | -0.204 | 0.941  | 0.688  | 0.708  | 0.484  | 0.979  | 0.116  | -0.027 | -1.192 | 0.016  | 66817  | TMEM170A | NM_025781_8_-1  |
| Chmp3         | 6.571  | 6.864  | 6.588  | 6.661  | 6.493  | 6.516  | 6.747  | 6.609  | 6.861  | 7.038  | 66700  | CHMP3    | NM_025783_6_+1  |
| Bcs1l         | 2.426  | 2.599  | 1.021  | 1.737  | 1.656  | 2.321  | 0.164  | 1.679  | 0.045  | 0.667  | 66821  | BCS1L    | NM_025784_1_+1  |
| Fbxo25        | 3.803  | 3.912  | 3.401  | 3.391  | 3.428  | 3.309  | 3.257  | 3.188  | 3.383  | 2.996  | 66822  | FBXO25   | NM_025785_8_+1  |
| Rnf186        | -4.981 | -4.981 | -2.184 | -1.135 | 1.418  | 1.434  | -0.321 | -0.678 | -4.981 | -4.227 | 66825  | RNF186   | NM_025786_4_+1  |
| Nacc1         | 1.858  | 2.258  | 3.480  | 3.577  | 3.495  | 3.360  | 3.301  | 3.265  | 3.884  | 4.159  | 66830  | NACC1    | NM_025788_8_-1  |
| Rsph3a        | 4.626  | 4.828  | 4.640  | 4.891  | 3.763  | 3.938  | 3.717  | 4.109  | 4.321  | 4.526  | 66832  | RSPH3    | NM_025789_17_+1 |
| Acot13        | 6.351  | 5.115  | 4.993  | 4.088  | 5.206  | 4.012  | 5.325  | 4.128  | 3.930  | 3.087  | 66834  | ACOT13   | NM_025790_13_-1 |
| Tmem223       | 5.062  | 4.517  | 5.090  | 5.065  | 5.171  | 5.265  | 5.308  | 5.337  | 4.676  | 4.401  | 66836  | NA       | NM_025791_19_+1 |
| Wdr45b        | 5.446  | 5.505  | 5.555  | 5.672  | 5.511  | 5.591  | 5.655  | 5.849  | 6.291  | 6.323  | 66840  | WDR45B   | NM_025793_11_-1 |
| Etfhd         | 5.261  | 5.329  | 4.713  | 5.178  | 4.647  | 4.614  | 4.697  | 5.120  | 5.147  | 5.253  | 66841  | ETFDH    | NM_025794_3_-1  |
| Mrpl33        | 7.183  | 7.198  | 6.646  | 6.718  | 7.050  | 7.242  | 7.514  | 7.363  | 7.985  | 7.617  | 66845  | MRPL33   | NM_025796_5_+1  |
| Cyb5a         | 7.541  | 8.065  | 9.346  | 9.110  | 7.737  | 8.317  | 7.810  | 8.157  | 6.455  | 7.041  | 109672 | CYB5A    | NM_025797_18_+1 |
| Hint3         | 5.791  | 5.738  | 5.720  | 5.571  | 4.657  | 4.879  | 4.653  | 4.244  | 2.570  | 2.624  | 66847  | HINT3    | NM_025798_10_-1 |
| Fuca2         | 7.704  | 7.437  | 7.606  | 7.650  | 6.968  | 6.933  | 7.136  | 7.183  | 7.250  | 7.322  | 66848  | FUCA2    | NM_025799_10_+1 |
| Ppp1r2        | 6.365  | 6.294  | 6.898  | 6.872  | 6.316  | 6.306  | 6.384  | 6.276  | 6.546  | 6.624  | 66849  | PPP1R2   | NM_025800_16_-1 |

|               |        |        |        |        |        |        |        |        |        |        |        |           |                 |
|---------------|--------|--------|--------|--------|--------|--------|--------|--------|--------|--------|--------|-----------|-----------------|
| Pnpla2        | -4.717 | -4.542 | -4.491 | -4.889 | -4.874 | -3.002 | -3.540 | -4.966 | -4.722 | -4.935 | 66853  | PNPLA2    | NM_025802_7_+1  |
| Tcf25         | 5.391  | 5.376  | 5.169  | 4.853  | 5.453  | 5.458  | 5.323  | 5.484  | 5.270  | 5.316  | 66855  | TCF25     | NM_025804_8_+1  |
| Plbd1         | 5.937  | 7.325  | 11.415 | 11.686 | 10.426 | 10.601 | 10.516 | 10.856 | 10.251 | 10.628 | 66857  | PLBD1     | NM_025806_6_-1  |
| Slc16a9       | 0.555  | -3.408 | -0.114 | -1.645 | 0.454  | -2.241 | 0.251  | -0.496 | -0.582 | -3.233 | 66859  | SLC16A9   | NM_025807_10_+1 |
| Lztr1         | 4.443  | 4.769  | 4.019  | 4.268  | 3.938  | 4.340  | 4.146  | 4.468  | 4.940  | 5.285  | 66863  | LZTR1     | NM_025808_16_+1 |
| Nhlrc2        | 3.973  | 4.256  | 5.743  | 5.437  | 4.801  | 4.639  | 4.588  | 4.741  | 5.203  | 5.113  | 66866  | NHLRC2    | NM_025811_19_+1 |
| Hmg20a        | 5.327  | 5.214  | 4.552  | 4.610  | 4.905  | 4.994  | 4.572  | 4.600  | 4.830  | 4.799  | 66867  | HMG20A    | NM_025812_9_+1  |
| Mfsd1         | 6.203  | 6.210  | 6.827  | 6.785  | 6.436  | 6.307  | 6.970  | 7.110  | 7.827  | 7.986  | 66868  | MFSD1     | NM_025813_3_+1  |
| Serbp1        | 5.746  | 5.663  | 5.243  | 5.293  | 5.592  | 5.515  | 5.309  | 4.974  | 4.412  | 4.347  | 66870  | SERBP1    | NM_025814_6_+1  |
| Cpne8         | -0.438 | -1.137 | 1.096  | 4.227  | -2.496 | -1.967 | -2.442 | -1.403 | -4.981 | -0.283 | 66871  | CPNE8     | NM_025815_15_-1 |
| Tax1bp1       | 8.110  | 8.200  | 8.168  | 8.037  | 7.690  | 7.834  | 7.851  | 7.797  | 7.894  | 8.106  | 52440  | TAX1BP1   | NM_025816_6_+1  |
| Ncbp3         | 4.482  | 4.608  | 5.235  | 5.152  | 5.023  | 4.946  | 4.789  | 4.694  | 4.597  | 4.604  | 66874  | NCBP3     | NM_025818_11_+1 |
| Swf1          | 5.177  | 5.381  | 4.929  | 4.827  | 5.494  | 5.563  | 5.141  | 4.716  | 3.987  | 4.535  | 66875  | SWT1      | NM_025819_1_-1  |
| Crnk1         | 4.980  | 5.240  | 5.080  | 5.171  | 5.075  | 5.299  | 5.313  | 5.420  | 5.718  | 5.777  | 66877  | CRNKL1    | NM_025820_2_-1  |
| Carhsp1       | 5.003  | 4.876  | 4.192  | 4.527  | 4.720  | 4.970  | 4.854  | 5.201  | 5.275  | 5.287  | 52502  | CARHSP1   | NM_025821_16_-1 |
| Rsrc1         | 5.388  | 5.172  | 4.989  | 4.841  | 5.377  | 5.132  | 5.435  | 4.910  | 4.873  | 4.571  | 66880  | RSRC1     | NM_025822_3_+1  |
| Pcyox1        | 5.161  | 5.098  | 4.658  | 5.126  | 4.290  | 4.365  | 5.241  | 5.527  | 7.433  | 7.132  | 66881  | PCYOX1    | NM_025823_6_-1  |
| Bzw1          | 7.869  | 8.328  | 8.025  | 7.914  | 7.389  | 7.350  | 7.426  | 7.812  | 8.019  | 8.196  | 66882  | BZW1      | NM_025824_1_+1  |
| Appbp2        | 5.319  | 5.019  | 5.525  | 5.463  | 5.111  | 5.018  | 4.952  | 4.912  | 5.341  | 5.445  | 66884  | APPBP2    | NM_025825_11_-1 |
| Acadsb        | 4.419  | 4.639  | 4.305  | 4.523  | 4.243  | 4.506  | 4.032  | 4.291  | 4.560  | 5.054  | 66885  | ACADSB    | NM_025826_7_+1  |
| Lonp2         | 5.679  | 5.763  | 5.565  | 5.791  | 5.596  | 5.739  | 5.266  | 5.676  | 5.740  | 5.947  | 66887  | LONP2     | NM_025827_8_+1  |
| Lman2         | 8.305  | 8.295  | 8.201  | 8.327  | 7.873  | 7.925  | 7.928  | 8.280  | 8.507  | 8.546  | 66890  | LMAN2     | NM_025828_13_-1 |
| Eif4e3        | 5.848  | 5.864  | 4.712  | 4.895  | 5.624  | 5.553  | 6.098  | 6.181  | 6.721  | 6.947  | 66892  | EIF4E3    | NM_025829_6_-1  |
| Wwp2          | 5.264  | 5.312  | 5.874  | 5.941  | 5.958  | 5.824  | 5.912  | 6.044  | 6.838  | 6.612  | 66894  | WWP2      | NM_025830_8_+1  |
| Pxdc1         | 0.137  | -2.060 | 1.081  | 2.006  | 3.364  | 4.362  | 2.896  | 4.230  | -0.588 | -0.266 | 66895  | PXDC1     | NM_025831_13_-1 |
| Naa16         | 3.981  | 4.601  | 4.454  | 4.667  | 4.737  | 4.720  | 4.550  | 4.527  | 4.439  | 4.774  | 66897  | NAA16     | NM_025832_14_-1 |
| Baiap2l1      | 1.995  | 0.472  | 0.525  | 0.517  | 1.333  | 0.827  | 1.733  | 1.171  | 1.601  | 1.440  | 66898  | BAIAP2L1  | NM_025833_5_-1  |
| Proz          | -2.647 | -1.018 | -1.012 | -1.000 | -0.979 | -1.773 | -1.490 | -1.689 | 0.457  | 0.370  | 66901  | PROZ      | NM_025834_8_+1  |
| Pccb          | 3.938  | 4.190  | 2.515  | 3.862  | 2.887  | 3.648  | 2.629  | 3.511  | 2.638  | 3.187  | 66904  | PCCB      | NM_025835_9_-1  |
| Plin3         | 6.697  | 6.507  | 6.014  | 6.108  | 5.821  | 5.828  | 6.095  | 6.019  | 6.075  | 6.024  | 66905  | PLIN3     | NM_025836_17_-1 |
| Mpi           | 3.198  | 3.105  | 4.112  | 4.293  | 3.631  | 3.374  | 3.388  | 3.575  | 3.311  | 3.329  | 110119 | MPI       | NM_025837_9_-1  |
| Tmem107       | 3.689  | 3.505  | 2.254  | 1.770  | 1.568  | 1.713  | 1.631  | 2.204  | 1.994  | 1.852  | 66910  | TMEM107   | NM_025838_11_+1 |
| Nudt16l1      | 6.941  | 6.914  | 5.701  | 6.020  | 6.875  | 6.860  | 6.292  | 6.136  | 5.749  | 5.421  | 66911  | NUDT16L1  | NM_025839_16_+1 |
| Bzw2          | 5.855  | 5.789  | 6.364  | 6.458  | 6.184  | 6.169  | 5.570  | 6.008  | 4.263  | 4.413  | 66912  | BZW2      | NM_025840_12_-1 |
| Kdelr2        | 6.180  | 6.383  | 5.960  | 5.635  | 4.702  | 5.002  | 5.217  | 5.463  | 5.340  | 5.256  | 66913  | KDEL2     | NM_025841_5_+1  |
| Vps28         | 8.032  | 8.262  | 7.192  | 7.367  | 7.618  | 7.786  | 7.578  | 7.659  | 7.009  | 6.884  | 66914  | VPS28     | NM_025842_15_-1 |
| Ndufb7        | 7.406  | 7.299  | 6.913  | 7.099  | 6.956  | 7.022  | 7.517  | 7.276  | 6.559  | 6.177  | 66916  | NDUFB7    | NM_025843_8_+1  |
| Chordc1       | 6.043  | 6.351  | 6.185  | 6.258  | 6.074  | 5.993  | 5.977  | 5.925  | 5.116  | 5.685  | 66917  | CHORDC1   | NM_025844_9_+1  |
| Prpf38b       | 5.880  | 6.043  | 7.591  | 7.531  | 7.183  | 7.212  | 7.003  | 6.697  | 6.235  | 6.549  | 66921  | PRPF38B   | NM_025845_3_-1  |
| Rras2         | 5.960  | 6.456  | 4.778  | 5.176  | 7.595  | 7.236  | 6.454  | 5.419  | 1.695  | 1.444  | 66922  | RRAS2     | NM_025846_7_-1  |
| Shdh          | 7.838  | 7.736  | 7.777  | 7.803  | 7.377  | 7.239  | 7.395  | 7.538  | 7.439  | 7.330  | 66925  | SDHD      | NM_025848_9_-1  |
| Tmem261       | 6.708  | 6.941  | 6.104  | 6.348  | 5.444  | 5.708  | 5.724  | 6.024  | 4.919  | 5.446  | 66928  | TMEM261   | NM_025849_4_-1  |
| 1700010114Rik | 1.126  | 1.420  | -0.444 | 0.838  | 0.121  | 0.023  | 0.346  | 0.284  | 0.586  | 1.648  | 66931  | C6orf118  | NM_025851_17_+1 |
| Rexo1         | 5.040  | 5.046  | 5.114  | 4.993  | 5.649  | 5.503  | 5.313  | 5.330  | 6.150  | 5.825  | 66932  | REXO1     | NM_025852_10_-1 |
| Dsn1          | 2.388  | 2.700  | 2.469  | 2.402  | 3.392  | 3.239  | 2.986  | 2.814  | 1.584  | 1.392  | 66934  | DSN1      | NM_025853_2_-1  |
| Cir1          | 5.730  | 5.652  | 4.826  | 4.738  | 5.027  | 5.033  | 5.385  | 5.092  | 4.674  | 4.535  | 66935  | CIR1      | NM_025854_2_-1  |
| Echdc1        | 1.919  | 2.706  | 3.484  | 3.835  | 2.407  | 3.114  | 1.325  | 2.504  | 0.871  | 1.855  | 52665  | ECHDC1    | NM_025855_10_+1 |
| Sh3d21        | -1.343 | -0.641 | -0.626 | -0.308 | 0.712  | 0.290  | -1.672 | -1.972 | -4.190 | -3.233 | 66938  | SH3D21    | NM_025856_4_-1  |
| Aagab         | 5.663  | 5.763  | 6.309  | 6.568  | 5.397  | 5.517  | 5.580  | 5.832  | 6.279  | 6.511  | 66939  | AAGAB     | NM_025857_9_+1  |
| Shisa5        | 6.963  | 6.499  | 6.795  | 6.654  | 7.619  | 7.471  | 8.497  | 8.784  | 9.201  | 9.148  | 66940  | SHISA5    | NM_025858_9_+1  |
| Arl1          | 5.664  | 5.526  | 5.588  | 5.570  | 5.169  | 5.095  | 5.361  | 5.457  | 5.851  | 5.819  | 104303 | ARL1      | NM_025859_10_+1 |
| Ddx18         | 5.445  | 5.303  | 5.749  | 5.595  | 5.710  | 5.717  | 5.847  | 5.763  | 4.807  | 4.439  | 66942  | DDX18     | NM_025860_1_-1  |
| Pqlc1         | -0.355 | -4.664 | 2.791  | 3.061  | 1.320  | 1.634  | 1.370  | 1.440  | 2.205  | 1.634  | 66943  | PQLC1     | NM_025861_18_+1 |
| Acad8         | 4.539  | 4.971  | 4.048  | 4.349  | 4.139  | 4.269  | 4.480  | 4.229  | 4.530  | 4.337  | 66948  | ACAD8     | NM_025862_9_-1  |
| Trim59        | 4.604  | 5.069  | 5.005  | 4.776  | 5.701  | 5.344  | 5.022  | 4.497  | 3.178  | 3.239  | 66949  | TRIM59    | NM_025863_3_-1  |
| Tmem206       | 5.272  | 5.566  | 5.841  | 5.789  | 6.611  | 6.623  | 6.219  | 6.230  | 5.176  | 5.359  | 66950  | TMEM206   | NM_025864_1_+1  |
| 2310030G06Rik | -4.981 | -4.981 | -3.759 | -0.695 | -4.966 | -4.966 | -4.954 | -4.420 | -4.981 | -4.316 | 66952  | C11orf52  | NM_025865_9_-1  |
| Cdca7         | -1.295 | -0.743 | 3.753  | 4.144  | 4.492  | 4.039  | 4.055  | 4.018  | 2.738  | 1.642  | 66953  | CDCA7     | NM_025866_2_+1  |
| Serpinb11     | -4.981 | -4.981 | -4.981 | -4.981 | -3.641 | -3.585 | -4.981 | -4.981 | -4.981 | -4.981 | 66957  | SERPINB11 | NM_025867_1_+1  |
| Tmx2          | 6.650  | 6.944  | 5.760  | 5.856  | 5.950  | 6.001  | 5.851  | 6.002  | 4.978  | 4.894  | 66958  | TMX2      | NM_025868_2_-1  |
| Swsap1        | 4.406  | 4.317  | 3.694  | 3.539  | 3.318  | 3.311  | 3.189  | 3.015  | 2.996  | 2.726  | 66962  | SWSAP1    | NM_025870_9_+1  |
| Golt1b        | 5.029  | 4.444  | 4.442  | 3.464  | 4.464  | 3.302  | 4.281  | 3.209  | 4.056  | 2.901  | 66964  | GOLT1B    | NM_025872_6_+1  |
| Trit1         | 6.087  | 6.156  | 5.859  | 6.169  | 5.427  | 5.632  | 4.916  | 5.089  | 4.085  | 4.049  | 66966  | TRIT1     | NM_025873_4_+1  |
| Rbm8a         | 6.994  | 6.899  | 6.295  | 6.272  | 6.287  | 6.207  | 6.613  | 6.224  | 5.717  | 5.375  | 60365  | RBM8A     | NM_025875_3_+1  |
| Cdk5rap1      | 4.791  | 3.731  | 4.293  | 3.079  | 4.401  | 3.392  | 4.110  | 2.865  | 3.513  | 2.460  | 66971  | CDK5RAP1  | NM_025876_2_-1  |
| Slc25a23      | 2.439  | 3.069  | 1.464  | 2.068  | 0.841  | 1.115  | 1.291  | 1.808  | 1.304  | 0.770  | 66972  | SLC25A23  | NM_025877_17_-1 |
| Mrps18b       | 5.981  | 5.812  | 5.747  | 5.784  | 5.325  | 5.179  | 5.340  | 5.280  | 4.638  | 4.265  | 66973  | MRPS18B   | NM_025878_17_-1 |
| Trappc13      | 3.516  | 2.892  | 2.362  | 0.660  | 1.310  | 0.071  | 0.612  | 2.026  | -1.653 | -1.129 | 66975  | TRAPPC13  | NM_025879_13_-1 |
| 2410002F23Rik | 6.703  | 6.479  | 5.244  | 5.327  | 5.634  | 5.728  | 5.301  | 5.247  | 4.504  | 3.913  | 668661 | NA        | NM_025880_7_+1  |
| Luc7l         | 1.426  | 1.599  | 0.922  | 1.860  | 2.236  | 1.623  | 1.870  | 1.446  | -2.780 | 0.295  | 66978  | LUC7L     | NM_025881_17_+1 |
| Pole4         | 7.644  | 8.042  | 6.885  | 7.125  | 7.058  | 7.221  | 6.749  | 6.801  | 4.575  | 4.840  | 66979  | POLE4     | NM_025882_6_-1  |
| Zdhc6         | 5.688  | 5.580  | 5.687  | 5.702  | 6.092  | 6.262  | 6.091  | 6.190  | 5.867  | 5.898  | 66980  | ZDHHC6    | NM_025883_19_-1 |
| Zfp830        | 4.820  | 5.113  | 4.823  | 4.882  | 4.728  | 4.968  | 4.934  | 4.998  | 4.779  | 4.897  | 66983  | ZNF830    | NM_025884_11_+1 |
| Med19         | 5.095  | 5.059  | 4.376  | 4.525  | 4.543  | 4.520  | 4.304  | 4.178  | 3.537  | 3.394  | 381379 | MED19     | NM_025885_2_+1  |

|               |        |        |        |        |        |        |        |        |        |        |        |                  |                 |
|---------------|--------|--------|--------|--------|--------|--------|--------|--------|--------|--------|--------|------------------|-----------------|
| Rassf7        | 4.266  | 4.140  | 3.632  | 3.713  | 3.122  | 3.503  | 3.074  | 3.018  | 2.022  | 2.104  | 66985  | RASSF7           | NM_025886_7_+1  |
| Rab5a         | 6.783  | 6.937  | 6.950  | 6.761  | 6.276  | 6.221  | 6.661  | 6.554  | 6.945  | 7.128  | 271457 | RAB5A            | NM_025887_17_+1 |
| Kctd20        | 5.330  | 5.697  | 6.061  | 5.988  | 5.713  | 5.620  | 5.818  | 5.864  | 7.543  | 7.321  | 66989  | KCTD20           | NM_025888_17_+1 |
| Tmem134       | 6.937  | 6.907  | 6.483  | 6.575  | 6.406  | 6.485  | 6.278  | 6.115  | 5.457  | 5.177  | 66990  | TMEM134          | NM_025889_19_+1 |
| Khdc3         | -0.659 | -2.681 | -4.582 | -4.124 | -2.989 | -4.265 | -2.081 | -2.905 | -0.785 | -1.692 | 66991  | KHDC3L           | NM_025890_9_+1  |
| Smardc3       | -0.786 | -2.997 | -1.582 | -2.077 | -2.607 | -3.291 | -3.362 | -2.834 | -2.335 | -2.426 | 66993  | SMARCD3          | NM_025891_5_-1  |
| Cep19         | 3.871  | 3.642  | 3.215  | 3.087  | 2.562  | 2.308  | 2.823  | 2.844  | 3.720  | 3.030  | 66994  | CEP19            | NM_025892_16_+1 |
| Zcchc18       | 4.251  | 3.748  | -1.441 | -0.828 | -0.214 | 0.431  | 0.104  | 1.061  | -1.266 | -2.316 | 66995  | ZCCHC18          | NM_025893_X_+1  |
| Psmd12        | 6.854  | 6.943  | 6.807  | 6.966  | 6.501  | 6.463  | 6.383  | 6.412  | 6.071  | 6.022  | 66997  | PSMD12           | NM_025894_11_+1 |
| Med28         | 8.023  | 8.124  | 7.198  | 7.326  | 7.276  | 7.542  | 7.282  | 7.239  | 6.124  | 6.345  | 66999  | MED28            | NM_025895_5_+1  |
| Rrp8          | 4.124  | 3.922  | 3.827  | 3.715  | 4.212  | 3.279  | 4.113  | 3.719  | 3.904  | 2.988  | 101867 | RRP8             | NM_025897_7_-1  |
| Napa          | 8.089  | 7.745  | 7.419  | 7.438  | 7.664  | 7.706  | 7.417  | 7.429  | 7.363  | 7.081  | 108124 | NAPA             | NM_025898_7_+1  |
| Uqcrc2        | 7.429  | 7.398  | 7.725  | 7.745  | 7.176  | 7.193  | 7.086  | 7.208  | 6.791  | 6.885  | 67003  | UQCRC2           | NM_025899_7_+1  |
| Dek           | 7.898  | 7.664  | 7.875  | 7.703  | 7.901  | 7.576  | 8.075  | 7.552  | 7.164  | 7.296  | 110052 | DEK              | NM_025900_13_-1 |
| Polr3k        | 6.308  | 6.436  | 6.123  | 6.185  | 5.866  | 5.987  | 6.110  | 5.940  | 5.183  | 5.245  | 67005  | POLR3K           | NM_025901_2_+1  |
| Cisd2         | 6.111  | 5.729  | 6.505  | 6.311  | 6.088  | 5.940  | 6.509  | 6.301  | 6.483  | 6.583  | 67006  | CISD2            | NM_025902_3_-1  |
| Ifrd2         | 1.917  | 1.377  | 1.743  | 2.769  | 2.066  | 3.136  | 1.909  | 3.102  | 2.072  | 1.866  | 15983  | IFRD2            | NM_025903_9_+1  |
| Yae1d1        | 5.644  | 5.474  | 4.566  | 4.550  | 4.568  | 4.424  | 4.261  | 4.328  | 3.673  | 3.655  | 67008  | YAE1D1           | NM_025904_13_-1 |
| Ttc23         | -4.823 | -4.733 | -4.739 | -4.850 | -4.958 | -4.960 | -4.885 | -4.971 | -4.825 | -4.905 | 67009  | TTC23            | NM_025905_7_+1  |
| Mettl6        | 3.862  | 4.043  | 3.986  | 4.162  | 3.677  | 3.740  | 3.838  | 3.922  | 3.994  | 3.832  | 67011  | METTL6           | NM_025907_14_-1 |
| Oma1          | 4.337  | 4.578  | 4.723  | 5.031  | 5.206  | 5.274  | 4.804  | 4.917  | 4.114  | 4.445  | 67013  | OMA1             | NM_025909_4_+1  |
| Mina          | 6.587  | 6.164  | 5.568  | 5.470  | 5.888  | 5.983  | 5.720  | 5.489  | 5.079  | 4.752  | 67014  | MINA             | NM_025910_16_+1 |
| Ccdc91        | 3.144  | 4.170  | 4.005  | 4.654  | 3.395  | 4.137  | 3.115  | 3.944  | 3.048  | 3.911  | 67015  | CCDC91           | NM_025911_6_+1  |
| Fam210b       | 4.009  | 4.067  | 3.884  | 4.183  | 3.833  | 4.398  | 4.106  | 4.692  | 4.676  | 4.470  | 67017  | FAM210B          | NM_025912_2_+1  |
| Actr6         | 4.866  | 4.947  | 4.650  | 4.523  | 4.227  | 4.089  | 4.174  | 3.917  | 3.407  | 3.503  | 67019  | ACTR6            | NM_025914_10_-1 |
| Tmem88        | 2.052  | 1.298  | 3.148  | 2.191  | 2.593  | 2.047  | 2.748  | 1.600  | 1.654  | 1.761  | 67020  | TMEM88           | NM_025915_11_-1 |
| Use1          | 6.965  | 6.856  | 6.227  | 6.252  | 6.340  | 6.297  | 6.497  | 6.201  | 5.841  | 5.322  | 67023  | USE1             | NM_025917_8_+1  |
| Ccdc43        | 4.669  | 4.725  | 4.234  | 4.483  | 4.357  | 4.264  | 4.234  | 4.336  | 4.440  | 4.759  | 52715  | CCDC43           | NM_025918_11_-1 |
| Rpl11         | 8.668  | 8.683  | 8.890  | 8.727  | 8.679  | 8.635  | 8.894  | 8.664  | 7.764  | 7.442  | 67025  | RPL11            | NM_025919_4_-1  |
| Thap4         | 3.150  | 3.694  | 4.010  | 4.135  | 3.424  | 3.240  | 3.475  | 3.554  | 3.299  | 3.527  | 67026  | THAP4            | NM_025920_1_-1  |
| 2610002M06Rik | 4.062  | 4.350  | 2.458  | 3.104  | 3.875  | 3.715  | 4.135  | 4.066  | 4.126  | 4.580  | 67028  | NA               | NM_025921_X_-1  |
|               | 5.600  | 5.498  | 4.858  | 4.889  | 4.905  | 4.870  | 4.808  | 4.838  | 4.313  | 4.366  | 16434  | ITPA             | NM_025922_2_+1  |
|               | 4.808  | 5.159  | 5.817  | 6.170  | 5.369  | 5.532  | 4.928  | 5.045  | 3.804  | 3.994  | 67030  | FANCL            | NM_025923_11_+1 |
|               | 4.710  | 5.079  | 4.789  | 4.902  | 4.738  | 4.419  | 4.662  | 4.527  | 4.400  | 4.473  | 67031  | UPF3A            | NM_025924_8_+1  |
| Dnajb4        | 2.886  | 3.550  | 1.712  | 2.110  | 4.498  | 4.494  | 4.055  | 3.997  | 2.900  | 3.714  | 67035  | DNAJB4           | NM_025926_3_-1  |
| Mrpl45        | 4.967  | 5.098  | 4.886  | 4.951  | 5.300  | 4.996  | 5.022  | 4.936  | 4.175  | 4.031  | 67036  | MRPL45           | NM_025927_11_+1 |
| Pmf1          | 4.632  | 4.448  | 5.271  | 5.515  | 5.110  | 4.796  | 4.832  | 4.759  | 3.709  | 3.130  | 67037  | PMF1 PMF1-BGLAIN | NM_025928_3_-1  |
| 2010109103Rik | -0.897 | -2.883 | -0.251 | -2.978 | -2.168 | -4.297 | -0.742 | -2.203 | 0.645  | -2.465 | 67038  | NA               | NM_025929_15_-1 |
|               | 5.899  | 6.074  | 4.006  | 3.728  | 4.518  | 4.618  | 4.046  | 4.506  | 3.608  | 3.402  | 67042  | IFT27            | NM_025931_15_-1 |
|               | 6.249  | 6.203  | 5.806  | 5.869  | 5.729  | 5.752  | 5.855  | 5.738  | 5.764  | 6.309  | 67043  | SYAP1            | NM_025932_X_-1  |
|               | 7.069  | 6.978  | 7.059  | 7.132  | 6.829  | 6.968  | 7.206  | 6.980  | 6.627  | 6.016  | 67044  | HIGD2A           | NM_025933_13_+1 |
| RioK2         | 5.400  | 5.227  | 4.388  | 4.617  | 4.453  | 4.784  | 4.180  | 4.168  | 3.824  | 3.863  | 67045  | RIOK2            | NM_025934_17_+1 |
| Tbc1d7        | 2.431  | 2.912  | 2.145  | 1.597  | 1.780  | 1.498  | 1.229  | 0.301  | 0.122  | -0.616 | 67046  | TBC1D7           | NM_025935_13_-1 |
| Rars          | 5.719  | 5.501  | 5.805  | 6.092  | 5.393  | 5.300  | 5.377  | 5.367  | 5.400  | 5.203  | 104458 | RARS             | NM_025936_11_-1 |
| Nkap          | 4.971  | 5.251  | 4.864  | 4.809  | 5.092  | 5.129  | 5.079  | 5.000  | 4.450  | 4.520  | 67050  | NKAP             | NM_025937_X_+1  |
| Rpp14         | 5.285  | 5.301  | 4.888  | 5.088  | 4.923  | 4.710  | 4.753  | 4.630  | 4.220  | 3.824  | 67053  | RPP14            | NM_025938_14_+1 |
| Paics         | 6.952  | 6.968  | 6.837  | 6.937  | 6.973  | 6.792  | 6.836  | 6.854  | 6.212  | 6.350  | 67054  | PAICS            | NM_025939_5_+1  |
| Ola1          | 4.965  | 5.353  | 5.703  | 5.747  | 5.528  | 5.440  | 5.409  | 5.313  | 4.582  | 4.729  | 67059  | OLA1             | NM_025942_2_-1  |
| Dzip1         | -2.273 | -0.224 | -1.668 | -0.857 | 2.432  | 1.540  | -0.776 | -1.927 | -2.736 | -3.882 | 66573  | DZIP1            | NM_025943_14_-1 |
| Tmem246       | -4.981 | -2.239 | -1.645 | -0.545 | -2.056 | -1.762 | -3.849 | -1.706 | -3.925 | -4.342 | 67063  | TMEM246          | NM_025944_4_-1  |
| Polr3d        | 3.740  | 3.665  | 3.136  | 2.946  | 3.028  | 3.007  | 2.943  | 3.245  | 2.841  | 3.200  | 67065  | POLR3D           | NM_025945_14_-1 |
| Romo1         | 3.007  | 2.325  | 1.744  | 1.358  | 1.790  | 1.653  | 1.387  | 1.174  | -0.043 | 0.246  | 67067  | ROMO1            | NM_025946_2_+1  |
| Dynlrb1       | 8.189  | 7.788  | 7.599  | 7.186  | 7.717  | 7.358  | 7.802  | 7.133  | 6.596  | 6.264  | 67068  | DYNLRB1          | NM_025947_2_+1  |
| Lsm14a        | 6.439  | 6.553  | 6.369  | 6.320  | 6.084  | 5.851  | 6.251  | 6.311  | 6.830  | 6.753  | 67070  | LSM14A           | NM_025948_7_-1  |
| Cdc37l1       | 3.441  | 2.992  | 3.279  | 3.137  | 2.958  | 3.026  | 2.701  | 2.580  | 2.614  | 2.781  | 67072  | CDC37L1          | NM_025950_19_+1 |
| Pi4k2b        | 2.504  | 3.268  | 3.471  | 2.904  | 0.784  | 1.913  | 1.399  | 2.551  | 2.906  | 3.173  | 67073  | PI4K2B           | NM_025951_5_+1  |
| Magt1         | 4.362  | 3.992  | 3.615  | 3.527  | 3.120  | 2.883  | 3.445  | 3.757  | 3.908  | 3.845  | 67075  | MAGT1            | NM_025952_X_-1  |
| Pgp           | 5.467  | 5.499  | 4.790  | 4.903  | 4.570  | 4.805  | 4.718  | 4.964  | 4.997  | 4.709  | 67078  | PGP              | NM_025954_17_+1 |
| Cand2         | 1.165  | 0.622  | 0.640  | 0.185  | -0.021 | -0.186 | -0.795 | -0.098 | -0.904 | -1.066 | 67088  | CAND2            | NM_025958_6_+1  |
| Psmc6         | 6.635  | 6.933  | 6.581  | 6.602  | 6.264  | 6.281  | 6.325  | 6.260  | 5.772  | 5.890  | 67089  | PSMC6            | NM_025959_14_+1 |
| Trappc6a      | 6.307  | 6.261  | 5.367  | 5.564  | 5.139  | 5.579  | 5.646  | 5.514  | 5.356  | 4.938  | 67091  | TRAPPC6A         | NM_025960_7_+1  |
| Gatm          | 1.564  | 1.425  | 7.550  | 8.582  | 4.238  | 4.732  | 5.074  | 7.439  | 3.640  | 8.103  | 67092  | GATM             | NM_025961_2_-1  |
| Mmachc        | 3.492  | 3.488  | 2.994  | 2.985  | 2.811  | 2.604  | 2.846  | 2.834  | 1.675  | 1.950  | 67096  | MMACHC           | NM_025962_4_-1  |
| Rps10         | 8.613  | 8.578  | 8.907  | 8.838  | 8.748  | 8.768  | 9.040  | 8.853  | 7.864  | 7.643  | 67097  | RPS10            | NM_025963_17_-1 |
| Mettl21a      | 5.750  | 5.475  | 4.598  | 4.428  | 4.269  | 4.424  | 4.197  | 4.488  | 4.298  | 4.370  | 67099  | METTL21A         | NM_025964_1_-1  |
| Ssr1          | 8.295  | 8.183  | 7.846  | 7.880  | 8.204  | 8.123  | 8.020  | 7.951  | 7.508  | 7.890  | 107513 | SSR1             | NM_025965_13_-1 |
| 2310039H08Rik | 6.052  | 5.435  | 4.967  | 4.320  | 4.553  | 4.273  | 5.033  | 4.390  | 3.736  | 3.292  | 67101  | NA               | NM_025966_17_+1 |
|               | 3.896  | 2.300  | 3.022  | 2.036  | 2.582  | 0.949  | 2.464  | 1.236  | 0.696  | -1.681 | 67102  | C21orf91         | NM_025967_16_-1 |
|               | 4.410  | 4.920  | 3.205  | 3.114  | 2.402  | 2.319  | 1.835  | 2.738  | 4.506  | 4.335  | 67103  | PTGR1            | NM_025968_4_-1  |
|               | 5.320  | 5.569  | 4.544  | 4.533  | 4.608  | 4.677  | 4.568  | 4.687  | 3.977  | 4.281  | 67105  | TIMM21           | NM_025969_18_-1 |
| Zbtb8os       | 5.984  | 6.035  | 5.395  | 5.798  | 5.459  | 5.888  | 5.608  | 5.458  | 4.097  | 4.392  | 67106  | ZBTB8OS          | NM_025970_4_+1  |
| Naaa          | 4.264  | 4.605  | 10.958 | 11.199 | 4.950  | 5.450  | 6.476  | 8.398  | 8.339  | 8.577  | 67111  | NAAA             | NM_025972_5_-1  |
| Rpl14         | 9.336  | 9.200  | 9.913  | 9.922  | 9.298  | 9.252  | 9.476  | 9.384  | 7.914  | 7.711  | 67115  | RPL14            | NM_025974_9_+1  |
| Dynlt3        | 6.374  | 6.809  | 5.646  | 5.953  | 5.164  | 5.569  | 5.504  | 6.013  | 5.432  | 6.284  | 67117  | DYNLT3           | NM_025975_X_-1  |

|               |          |        |        |        |        |        |        |        |        |        |        |        |          |                 |
|---------------|----------|--------|--------|--------|--------|--------|--------|--------|--------|--------|--------|--------|----------|-----------------|
|               | Bfar     | 6.153  | 6.355  | 6.283  | 6.158  | 6.046  | 6.165  | 6.014  | 5.866  | 5.770  | 5.937  | 67118  | BFAR     | NM_025976_16_+1 |
|               | Ccdc159  | -1.916 | -1.453 | -3.813 | -2.527 | -4.575 | -4.215 | -4.899 | -4.747 | -4.505 | -4.981 | 67119  | CCDC159  | NM_025977_9_+1  |
|               | Ttc14    | 2.790  | 1.135  | 4.122  | 1.217  | 3.893  | 2.537  | 1.648  | 1.561  | 4.536  | 4.875  | 67120  | TTC14    | NM_025978_3_+1  |
|               | Mastl    | -0.440 | 0.025  | 0.834  | 0.433  | 1.545  | -0.031 | 0.548  | 0.414  | -0.509 | -0.750 | 67121  | MASTL    | NM_025979_2_-1  |
|               | Nrarp    | -2.362 | -2.681 | -2.215 | -2.110 | 0.097  | -1.133 | 1.782  | -0.107 | 2.872  | 1.694  | 67122  | NRARP    | NM_025980_2_+1  |
|               | Tspan31  | 7.847  | 7.916  | 6.386  | 6.666  | 6.703  | 6.697  | 6.608  | 6.837  | 6.958  | 6.988  | 67125  | TSPAN31  | NM_025982_10_-1 |
|               | Atp5e    | 7.775  | 7.290  | 7.972  | 7.686  | 7.736  | 7.463  | 7.945  | 7.473  | 6.906  | 6.406  | 67126  | NA       | NM_025983_2_-1  |
|               | Ube2g1   | 6.290  | 6.424  | 6.258  | 6.096  | 5.864  | 5.963  | 6.045  | 6.082  | 6.014  | 6.364  | 67128  | UBE2G1   | NM_025985_11_+1 |
|               | Ndufa6   | 7.380  | 7.340  | 7.522  | 7.470  | 7.126  | 7.217  | 7.532  | 7.324  | 6.681  | 6.499  | 67130  | NDUFA6   | NM_025987_15_-1 |
|               | Acbd4    | 4.207  | 4.008  | 2.304  | 2.999  | 2.920  | 3.156  | 2.749  | 3.438  | 3.346  | 3.476  | 67131  | ACBD4    | NM_025988_11_+1 |
|               | Gp2      | -1.413 | -1.295 | 6.375  | 8.784  | 2.367  | 6.064  | 0.942  | 5.361  | -4.981 | -2.795 | 67133  | GP2      | NM_025989_7_-1  |
|               | Kbtbd4   | 4.067  | 3.948  | 3.871  | 4.028  | 4.011  | 4.062  | 3.842  | 4.074  | 3.878  | 4.130  | 67136  | KBTBD4   | NM_025991_2_+1  |
|               | Herc6    | 4.799  | 5.019  | 4.912  | 4.603  | 5.804  | 5.388  | 5.418  | 4.639  | 4.883  | 4.648  | 67138  | HERC6    | NM_025992_6_+1  |
|               | Mis12    | 4.067  | 4.041  | 4.894  | 5.038  | 4.213  | 3.861  | 4.294  | 4.490  | 4.753  | 4.823  | 67139  | MIS12    | NM_025993_11_+1 |
|               | Efh2     | 5.924  | 5.904  | 9.248  | 9.547  | 9.397  | 9.145  | 9.175  | 9.107  | 8.383  | 8.898  | 27984  | EFHD2    | NM_025994_4_-1  |
|               | Fbxo5    | 1.413  | 1.863  | 2.154  | 2.482  | 3.881  | 3.412  | 3.175  | 2.797  | 2.364  | 1.672  | 67141  | FBXO5    | NM_025995_10_-1 |
|               | Tomm34   | 3.202  | 2.734  | 3.372  | 3.240  | 2.953  | 2.870  | 2.835  | 2.561  | 3.444  | 2.744  | 67145  | TOMM34   | NM_025996_2_-1  |
|               | Fam103a1 | 7.439  | 7.308  | 6.685  | 6.241  | 6.468  | 6.184  | 6.740  | 6.322  | 6.658  | 6.353  | 67148  | FAM103A1 | NM_025997_7_+1  |
|               | Rnf141   | 3.284  | 3.916  | 4.122  | 3.685  | 3.312  | 2.753  | 2.866  | 3.634  | 2.907  | 3.225  | 67150  | RNF141   | NM_025999_7_-1  |
|               | PSmd9    | 5.958  | 6.073  | 4.616  | 4.670  | 4.922  | 4.885  | 4.759  | 4.774  | 4.730  | 4.212  | 67151  | PSMD9    | NM_026000_5_+1  |
|               | Rnaseh2b | 5.248  | 4.624  | 4.947  | 4.727  | 5.088  | 4.667  | 4.836  | 4.254  | 3.617  | 3.119  | 67153  | RNASEH2B | NM_026001_14_+1 |
|               | Mtdh     | 7.621  | 7.542  | 6.795  | 6.617  | 7.094  | 7.346  | 7.061  | 7.014  | 6.905  | 7.078  | 67154  | MTDH     | NM_026002_15_+1 |
|               | Smarca2  | 4.060  | 3.283  | 1.160  | 0.063  | 5.444  | 5.840  | 3.608  | 1.596  | -3.240 | -4.926 | 67155  | SMARCA2  | NM_026003_19_+1 |
| 2610301B20Rik | Nt5c3    | 4.773  | 5.207  | 4.726  | 4.952  | 4.592  | 4.697  | 4.616  | 4.978  | 3.869  | 3.859  | 107569 | NT5C3A   | NM_026004_6_-1  |
|               |          | 4.556  | 4.979  | 3.809  | 3.925  | 3.456  | 3.937  | 3.181  | 3.926  | 2.926  | 3.865  | 67157  | C8orf37  | NM_026005_4_+1  |
|               | Sft2d3   | 4.342  | 4.344  | 3.277  | 3.266  | 2.961  | 3.360  | 2.825  | 3.177  | 3.057  | 2.912  | 67158  | SFT2D3   | NM_026006_18_-1 |
|               | Eef1g    | 8.057  | 7.864  | 8.273  | 8.566  | 7.982  | 7.971  | 7.981  | 8.130  | 6.510  | 6.697  | 67160  | EEF1G    | NM_026007_19_+1 |
|               | Ccdc47   | 6.729  | 6.855  | 6.196  | 6.256  | 6.898  | 6.878  | 6.505  | 6.539  | 6.485  | 6.692  | 67163  | CCDC47   | NM_026009_11_-1 |
|               | Lipt2    | 2.202  | 2.091  | 1.926  | 1.969  | 1.609  | 1.643  | 1.844  | 2.057  | 2.211  | 2.154  | 67164  | LIPT2    | NM_026010_7_+1  |
|               | Arl8b    | 6.495  | 6.519  | 6.572  | 6.662  | 6.675  | 6.823  | 6.697  | 6.750  | 6.667  | 6.993  | 67166  | ARL8B    | NM_026011_6_+1  |
|               | Nradd    | -0.026 | 0.570  | -0.568 | -0.432 | -1.048 | -1.459 | -0.970 | -1.460 | -0.680 | -0.335 | 67169  | NA       | NM_026012_9_-1  |
|               | Dram2    | 5.323  | 5.480  | 4.945  | 5.121  | 5.522  | 5.812  | 5.850  | 6.295  | 6.126  | 6.772  | 67171  | DRAM2    | NM_026013_3_+1  |
|               | Cdt1     | 2.161  | 2.171  | 3.524  | 3.357  | 4.135  | 3.745  | 3.845  | 3.899  | 3.995  | 3.437  | 67177  | CDT1     | NM_026014_8_+1  |
|               | Zmat5    | 6.507  | 6.114  | 5.292  | 5.400  | 5.926  | 5.618  | 6.154  | 5.553  | 5.237  | 4.411  | 67178  | ZMAT5    | NM_026015_11_+1 |
|               | Ctdnep1  | 4.765  | 4.450  | 5.066  | 5.431  | 5.137  | 5.020  | 5.327  | 5.262  | 4.451  | 4.583  | 67181  | CTDNEP1  | NM_026017_11_+1 |
|               | Pdzk1ip1 | -1.366 | 1.508  | 0.989  | 3.611  | -3.320 | 2.039  | -0.738 | 1.186  | -1.463 | -1.730 | 67182  | PDZK1IP1 | NM_026018_4_+1  |
|               | Rplp2    | 8.611  | 8.448  | 9.024  | 8.847  | 9.198  | 9.075  | 9.446  | 9.052  | 7.961  | 7.555  | 67186  | RPLP2    | NM_026020_7_+1  |
|               | Zmynd19  | 3.723  | 3.945  | 3.545  | 3.731  | 3.503  | 3.392  | 2.971  | 3.154  | 1.303  | 1.568  | 67187  | ZMYND19  | NM_026021_2_+1  |
|               | Nudcd2   | 5.436  | 5.248  | 5.212  | 5.344  | 4.780  | 4.866  | 4.914  | 4.801  | 3.575  | 3.891  | 52653  | NUDCD2   | NM_026023_11_+1 |
|               | Ube2t    | 1.654  | 1.650  | 2.731  | 0.747  | 2.431  | 0.077  | 2.233  | 0.641  | -0.164 | -1.406 | 67196  | UBE2T    | NM_026024_1_+1  |
|               | Zcrb1    | 6.441  | 6.337  | 5.653  | 5.394  | 5.707  | 5.488  | 5.762  | 5.407  | 4.909  | 4.721  | 67197  | ZCRB1    | NM_026025_15_-1 |
|               | Pfdn1    | 5.450  | 5.106  | 4.369  | 4.763  | 4.557  | 4.579  | 4.650  | 4.599  | 3.719  | 3.569  | 67199  | PFDN1    | NM_026027_18_-1 |
|               | Ccdc77   | 2.124  | 2.078  | 1.665  | 1.131  | 2.466  | 2.432  | 2.249  | 2.019  | 2.018  | 2.093  | 67200  | CCDC77   | NM_026028_6_-1  |
|               | Glod4    | 6.976  | 7.002  | 6.847  | 6.680  | 6.357  | 6.262  | 6.314  | 6.178  | 5.589  | 5.363  | 67201  | GLOD4    | NM_026029_11_-1 |
|               | Eif2s2   | 7.098  | 7.122  | 7.042  | 7.281  | 6.586  | 6.697  | 6.968  | 7.123  | 6.111  | 6.778  | 67204  | EIF2S2   | NM_026030_2_-1  |
|               | Utp11l   | 6.103  | 6.117  | 5.251  | 5.194  | 5.695  | 5.634  | 5.507  | 5.327  | 4.283  | 4.278  | 67205  | UTP11    | NM_026031_4_-1  |
|               | Lsm1     | 6.323  | 6.392  | 5.720  | 5.727  | 5.706  | 5.732  | 5.576  | 5.251  | 4.301  | 4.295  | 67207  | LSM1     | NM_026032_8_+1  |
|               | Gatad1   | 5.552  | 5.551  | 4.222  | 3.494  | 3.704  | 3.062  | 3.635  | 3.358  | 3.818  | 3.574  | 67210  | GATAD1   | NM_026033_5_-1  |
|               | Armc10   | 5.237  | 5.168  | 4.800  | 4.583  | 4.627  | 4.499  | 4.756  | 4.474  | 4.419  | 4.084  | 67211  | ARMC10   | NM_026034_5_+1  |
|               | Mrp155   | 4.556  | -4.981 | 3.770  | -4.911 | 3.591  | -3.245 | 3.922  | -4.732 | 2.795  | -2.873 | 67212  | MRPL55   | NM_026035_11_+1 |
|               | Cmtm6    | 6.664  | 6.939  | 7.441  | 7.307  | 6.849  | 6.949  | 7.123  | 7.541  | 9.174  | 9.131  | 67213  | CMTM6    | NM_026036_9_+1  |
|               | Mboat2   | -4.981 | -4.320 | -4.777 | -0.617 | -4.665 | -0.508 | -4.829 | -1.702 | -4.852 | -0.082 | 67216  | MBOAT2   | NM_026037_12_+1 |
|               | L3hyppdh | -2.362 | -1.294 | -0.768 | 0.667  | -2.907 | -2.175 | -1.061 | -0.407 | -4.394 | 0.100  | 67217  | L3HYPPDH | NM_026038_12_-1 |
|               | Med18    | 3.325  | 3.026  | 2.747  | 2.436  | 3.025  | 2.713  | 2.984  | 2.567  | 2.930  | 2.726  | 67219  | MED18    | NM_026039_4_-1  |
|               | Srfbp1   | 4.154  | 3.984  | 3.805  | 3.825  | 3.789  | 3.676  | 3.728  | 3.796  | 3.512  | 3.388  | 67222  | SRFBP1   | NM_026040_18_+1 |
|               | Rrp15    | 4.995  | 4.967  | 4.462  | 4.615  | 4.614  | 4.366  | 4.469  | 4.502  | 3.361  | 3.195  | 67223  | RRP15    | NM_026041_1_-1  |
|               | Med29    | 5.783  | 5.680  | 4.973  | 5.029  | 4.933  | 5.140  | 5.169  | 5.035  | 4.169  | 3.949  | 67224  | MED29    | NM_026042_7_-1  |
|               | Rnpc3    | 4.566  | 5.270  | 4.345  | 4.376  | 4.451  | 4.366  | 4.283  | 4.324  | 3.910  | 4.042  | 67225  | RNPC3    | NM_026043_3_-1  |
|               | Dph7     | 4.585  | 4.622  | 3.969  | 3.983  | 4.224  | 4.096  | 3.690  | 3.790  | 3.213  | 2.857  | 67228  | DPH7     | NM_026044_2_+1  |
|               | Prpf18   | 4.743  | 4.897  | 5.765  | 5.593  | 5.901  | 5.852  | 5.540  | 5.396  | 6.071  | 6.006  | 67229  | PRPF18   | NM_026045_2_-1  |
|               | Zfp329   | 3.381  | 3.572  | 3.496  | 3.278  | 4.157  | 4.006  | 4.198  | 3.916  | 3.653  | 3.956  | 67230  | ZNF329   | NM_026046_7_-1  |
|               | Rnf219   | 3.281  | 2.858  | 3.301  | 3.027  | 3.715  | 3.614  | 3.911  | 3.201  | 2.465  | 2.587  | 72486  | RNF219   | NM_026047_14_-1 |
|               | Cinp     | 4.151  | 4.331  | 3.603  | 3.819  | 3.786  | 3.708  | 3.773  | 4.105  | 3.459  | 3.384  | 67236  | CINP     | NM_026048_12_-1 |
|               | Fam220a  | 1.029  | 0.722  | -0.997 | -0.288 | 0.356  | 0.831  | 1.005  | -0.584 | -4.656 | -0.130 | 67238  | FAM220A  | NM_026050_5_+1  |
| 2810474O19Rik | Gemin6   | 3.781  | 3.871  | 3.566  | 3.476  | 3.976  | 3.979  | 3.484  | 3.650  | 1.667  | 2.099  | 67242  | GEMIN6   | NM_026053_17_+1 |
|               |          | 5.137  | 4.737  | 5.899  | 5.330  | 6.150  | 6.125  | 6.076  | 5.679  | 5.925  | 5.675  | 67246  | KIAA1551 | NM_026054_6_+1  |
|               | Rpl39    | 8.139  | 8.006  | 8.653  | 8.515  | 8.354  | 8.246  | 8.639  | 8.321  | 7.024  | 7.220  | 67248  | RPL39    | NM_026055_X_-1  |
|               | Zfp422   | 5.613  | 5.797  | 6.028  | 5.941  | 5.622  | 5.583  | 5.196  | 5.225  | 4.639  | 4.558  | 67255  | ZNF22    | NM_026057_6_-1  |
|               | Cers4    | 3.418  | 4.392  | 0.851  | 1.481  | 0.877  | 1.636  | 1.476  | 3.026  | 2.048  | 2.396  | 67260  | CERS4    | NM_026058_8_+1  |
|               | Ndufb8   | 8.226  | 8.183  | 7.905  | 8.040  | 7.934  | 8.026  | 8.265  | 8.188  | 7.485  | 7.338  | 67264  | NDUFB8   | NM_026061_19_-1 |
|               | Fam69a   | 7.518  | 8.080  | 6.851  | 6.738  | 7.298  | 7.584  | 6.980  | 7.040  | 7.338  | 7.595  | 67266  | FAM69A   | NM_026062_5_-1  |
|               | Uqcc2    | 6.281  | 5.924  | 5.649  | 5.688  | 6.353  | 6.366  | 6.554  | 5.926  | 4.950  | 4.694  | 67267  | UQCC2    | NM_026063_17_-1 |
|               | My112a   | 8.672  | 8.227  | 9.212  | 8.897  | 9.129  | 9.016  | 8.981  | 8.779  | 8.498  | 8.118  | 67268  | MYL12B   | NM_026064_17_-1 |
|               | Mrpl42   | 6.954  | 6.826  | 7.649  | 7.487  | 6.336  | 6.451  | 6.651  | 6.638  | 5.290  | 5.262  | 67270  | MRPL42   | NM_026065_10_-1 |

|               |        |        |        |        |        |        |        |        |        |        |        |          |                 |
|---------------|--------|--------|--------|--------|--------|--------|--------|--------|--------|--------|--------|----------|-----------------|
| Eri1          | 5.157  | 5.534  | 6.031  | 5.959  | 6.195  | 5.993  | 6.145  | 6.106  | 6.122  | 6.144  | 67276  | ERI1     | NM_026067_8_-1  |
| Med31         | 5.820  | 5.925  | 4.378  | 4.084  | 4.418  | 4.331  | 4.591  | 4.339  | 3.465  | 3.569  | 67279  | MED31    | NM_026068_11_-1 |
| Rpl37         | 8.907  | 8.502  | 9.546  | 9.259  | 9.138  | 8.680  | 9.399  | 8.968  | 8.320  | 7.894  | 67281  | RPL37    | NM_026069_15_+1 |
| Ccdc53        | 5.941  | 5.891  | 5.594  | 5.573  | 5.102  | 5.254  | 5.173  | 5.170  | 4.530  | 4.659  | 67282  | CCDC53   | NM_026070_10_+1 |
| Slc25a19      | 5.430  | 4.348  | 4.981  | 4.341  | 5.135  | 4.527  | 5.087  | 4.366  | 4.466  | 3.994  | 67283  | SLC25A19 | NM_026071_11_-1 |
| Cwc27         | 4.833  | 5.299  | 4.582  | 4.433  | 4.667  | 4.565  | 4.259  | 4.337  | 4.130  | 3.845  | 67285  | CWC27    | NM_026072_13_-1 |
| Ift22         | 4.546  | 4.637  | 4.576  | 4.391  | 3.423  | 3.884  | 3.735  | 4.066  | 3.213  | 3.066  | 67286  | IFT22    | NM_026073_5_+1  |
| Srek1ip1      | 4.857  | 5.208  | 4.568  | 4.573  | 4.026  | 4.652  | 4.273  | 4.389  | 3.304  | 3.615  | 67288  | NA       | NM_026075_13_+1 |
| 3110040N11Rik | 4.757  | 4.549  | 4.206  | 4.136  | 4.003  | 4.153  | 4.032  | 3.707  | 2.903  | 2.720  | 67290  | C15orf40 | NM_026077_7_-1  |
| Pigc          | 3.165  | 3.102  | 3.023  | 2.878  | 3.225  | 3.320  | 3.529  | 3.318  | 2.799  | 3.264  | 67292  | PIGC     | NM_026078_1_+1  |
| Ikbkap        | 3.754  | 3.901  | 3.913  | 4.176  | 4.309  | 4.234  | 4.307  | 4.748  | 5.022  | 4.933  | 230233 | IKBKAP   | NM_026079_4_-1  |
| Mrps24        | 6.555  | 6.709  | 6.238  | 6.270  | 5.928  | 6.346  | 6.358  | 6.432  | 5.872  | 5.718  | 64660  | MRPS24   | NM_026080_11_-1 |
| Gprasp1       | -1.997 | 0.866  | -2.820 | 0.730  | 0.537  | 1.268  | -0.875 | -0.318 | 0.205  | -2.459 | 67298  | GPRASP1  | NM_026081_X_+1  |
| Dock7         | 2.032  | 1.808  | 4.640  | 4.182  | 4.004  | 3.860  | 4.303  | 4.552  | 3.904  | 4.728  | 67299  | DOCK7    | NM_026082_4_-1  |
| Zc3h13        | 5.394  | 5.592  | 5.561  | 5.412  | 5.973  | 5.936  | 5.767  | 5.466  | 5.162  | 5.026  | 67302  | NA       | NM_026083_14_+1 |
| Pbld2         | -1.365 | -2.275 | -0.281 | -0.381 | -0.495 | -0.326 | -3.111 | -2.946 | -4.981 | -3.758 | 67307  | NA       | NM_026085_10_+1 |
| Nanp          | 4.559  | 4.868  | 3.728  | 4.066  | 4.413  | 3.992  | 4.184  | 4.128  | 3.140  | 3.163  | 67311  | NANP     | NM_026086_2_-1  |
| 1700022111Rik | -4.981 | -2.883 | -4.217 | -2.357 | -4.978 | -4.611 | -4.981 | -4.981 | -4.981 | -4.981 | 67317  | C9orf131 | NM_026088_4_+1  |
| 1700037H04Rik | 3.328  | 3.648  | 3.879  | 4.151  | 3.447  | 3.768  | 3.446  | 4.001  | 4.010  | 3.901  | 67326  | C20orf27 | NM_026091_2_-1  |
| Snrpd3        | 7.290  | 7.254  | 6.791  | 6.932  | 6.956  | 6.975  | 7.066  | 6.796  | 5.496  | 5.342  | 67332  | SNRPD3   | NM_026095_10_+1 |
| Rffl          | 1.751  | 0.750  | -0.357 | 0.327  | -0.298 | 0.788  | 1.491  | 0.549  | 2.774  | 2.068  | 67338  | RFFL     | NM_026097_11_-1 |
| Herc4         | 4.261  | 4.500  | 5.470  | 5.406  | 6.276  | 5.839  | 6.586  | 6.281  | 7.771  | 7.814  | 67345  | HERC4    | NM_026101_10_+1 |
| Daam1         | 1.198  | 2.851  | 2.302  | 2.365  | 1.484  | 2.008  | 0.146  | 0.553  | 1.783  | 2.354  | 208846 | DAAM1    | NM_026102_12_+1 |
| Dr1           | 6.123  | 6.334  | 5.802  | 5.768  | 5.704  | 5.756  | 6.121  | 6.151  | 7.218  | 7.271  | 13486  | DR1      | NM_026106_5_+1  |
| Zkscan6       | 0.690  | 0.730  | -0.183 | -1.491 | -1.898 | -2.526 | -1.893 | -1.633 | -0.122 | -1.214 | 52712  | ZNF18    | NM_026107_11_+1 |
| Paxbp1        | 6.224  | 6.367  | 6.473  | 6.118  | 7.127  | 7.093  | 6.844  | 6.204  | 5.341  | 5.763  | 67367  | PAXBP1   | NM_026110_16_-1 |
| Qpctl         | 4.291  | 3.204  | 3.267  | 2.190  | 2.402  | 1.636  | 2.579  | 2.541  | 3.632  | 2.963  | 67369  | QPCTL    | NM_026111_7_-1  |
| Zfp606        | 2.519  | 2.335  | 2.458  | 2.628  | 2.257  | 2.496  | 2.801  | 2.575  | 2.681  | 3.170  | 67370  | ZNF606   | NM_026112_7_+1  |
| Gtf3c6        | 6.122  | 6.046  | 5.695  | 5.870  | 4.892  | 4.885  | 5.123  | 5.029  | 3.978  | 3.875  | 67371  | GTF3C6   | NM_026113_10_-1 |
| Eif2s1        | 7.281  | 7.504  | 7.930  | 8.248  | 7.199  | 7.214  | 7.010  | 7.296  | 6.224  | 6.647  | 13665  | EIF2S1   | NM_026114_12_+1 |
| Hat1          | 6.617  | 7.202  | 6.114  | 5.934  | 7.016  | 6.710  | 6.641  | 6.173  | 4.911  | 4.506  | 107435 | HAT1     | NM_026115_2_+1  |
| Bbs2          | 3.679  | 2.858  | 2.615  | 1.114  | 2.429  | 1.734  | 2.093  | 1.135  | 2.213  | 0.015  | 67378  | BBS2     | NM_026116_8_-1  |
| Med4          | 5.540  | 5.691  | 4.749  | 4.675  | 5.070  | 5.098  | 5.081  | 5.130  | 4.712  | 4.673  | 67381  | MED4     | NM_026119_14_+1 |
| Carnmt1       | 5.288  | 5.375  | 4.927  | 4.834  | 4.859  | 4.612  | 4.861  | 4.877  | 3.837  | 4.154  | 67383  | CARNMT1  | NM_026120_19_+1 |
| Bag4          | 3.684  | 3.746  | 4.146  | 3.883  | 4.084  | 3.925  | 3.771  | 3.756  | 3.790  | 3.864  | 67384  | BAG4     | NM_026121_8_-1  |
| Hmgn3         | 7.054  | 6.936  | 5.144  | 5.521  | 5.152  | 5.141  | 3.617  | 3.840  | 1.168  | 1.517  | 94353  | NA       | NM_026122_9_-1  |
| Unc50         | 7.154  | 7.240  | 6.762  | 6.541  | 6.305  | 6.318  | 6.410  | 6.423  | 6.164  | 6.261  | 67387  | UNC50    | NM_026123_1_+1  |
| 1110008F13Rik | 7.257  | 7.209  | 8.444  | 8.215  | 7.182  | 7.263  | 7.422  | 7.617  | 7.955  | 7.808  | 67388  | C20orf24 | NM_026124_2_+1  |
| Fam132a       | 2.647  | 1.494  | 1.758  | 2.676  | 2.609  | 3.177  | 2.223  | 3.522  | 2.413  | 1.501  | 67389  | FAM132A  | NM_026125_4_+1  |
| Fundc2        | 5.559  | 5.366  | 4.567  | 4.662  | 5.262  | 5.156  | 5.152  | 5.092  | 4.111  | 4.266  | 67391  | FUNDC2   | NM_026126_X_+1  |
| 4833420G17Rik | 3.821  | 3.511  | 3.889  | 3.543  | 3.307  | 3.734  | 3.397  | 3.527  | 3.969  | 3.698  | 67392  | C5orf34  | NM_026127_13_+1 |
| Erp29         | 8.657  | 8.548  | 8.124  | 8.316  | 7.887  | 8.097  | 7.859  | 8.083  | 8.025  | 8.141  | 67397  | ERP29    | NM_026129_5_-1  |
| Srpr          | 6.394  | 6.602  | 6.531  | 6.546  | 6.315  | 6.597  | 6.524  | 6.704  | 7.007  | 6.908  | 67398  | SRPRA    | NM_026130_9_+1  |
| Pdlim7        | -4.701 | -4.981 | 0.926  | 0.599  | -1.437 | -1.415 | -2.168 | -2.597 | -2.752 | -1.573 | 67399  | PDLM7    | NM_026131_13_-1 |
| Txndc8        | -4.981 | -4.981 | -4.433 | -3.588 | -4.963 | -4.642 | -4.981 | -4.981 | -4.981 | -4.981 | 67402  | TXNDC8   | NM_026132_4_-1  |
| Wdr13         | 4.070  | 4.566  | 4.027  | 4.056  | 3.861  | 4.621  | 3.793  | 4.270  | 4.122  | 4.615  | 73447  | WDR13    | NM_026137_X_-1  |
| Armxc2        | -3.794 | -0.305 | -2.971 | -2.192 | -0.567 | -1.828 | -1.664 | -0.779 | -4.735 | -4.591 | 67416  | ARMCX2   | NM_026139_X_-1  |
| Ears2         | 3.048  | 3.159  | 2.776  | 3.014  | 2.963  | 2.970  | 2.999  | 2.596  | 1.520  | 1.625  | 67417  | EARS2    | NM_026140_7_-1  |
| Ppil4         | 6.486  | 6.618  | 6.298  | 6.395  | 6.627  | 6.693  | 6.541  | 6.335  | 6.407  | 6.540  | 67418  | PPIL4    | NM_026141_10_+1 |
| Dhdds         | 4.935  | 5.026  | 4.353  | 5.020  | 4.418  | 3.401  | 4.523  | 4.708  | 5.181  | 5.573  | 67422  | DHDDS    | NM_026144_4_-1  |
| Kctd10        | 6.266  | 6.028  | 6.473  | 6.470  | 5.680  | 5.335  | 5.987  | 6.261  | 7.512  | 7.173  | 330171 | KCTD10   | NM_026145_5_-1  |
| Eps8l1        | 1.830  | -4.981 | 2.062  | -4.893 | 2.490  | -3.039 | 2.321  | -4.570 | 1.946  | -3.576 | 67425  | EPS8L1   | NM_026146_7_+1  |
| Rps20         | 9.136  | 8.957  | 9.210  | 9.109  | 8.687  | 8.496  | 8.996  | 8.723  | 7.252  | 7.170  | 67427  | RPS20    | NM_026147_4_-1  |
| Lims1         | 7.241  | 7.289  | 5.274  | 5.086  | 6.078  | 5.678  | 6.605  | 6.827  | 7.945  | 8.285  | 110829 | LIMS1    | NM_026148_10_+1 |
| Nudcd1        | 2.184  | 2.279  | 1.442  | 2.355  | 1.751  | 1.530  | 1.907  | 1.368  | -0.143 | 0.969  | 67429  | NUDCD1   | NM_026149_15_-1 |
| 4921536K21Rik | -3.668 | -1.793 | -2.783 | -2.412 | -3.522 | -4.442 | -3.322 | -3.179 | -1.748 | -3.435 | 67430  | C5orf52  | NM_026150_11_-1 |
| Hoga1         | -2.948 | -4.981 | 1.538  | 1.365  | -2.508 | -2.053 | -2.477 | -3.112 | -2.834 | -3.853 | 67432  | HOGA1    | NM_026152_19_+1 |
| Ankrd33b      | -0.017 | -4.981 | 3.151  | 3.345  | 3.071  | 2.664  | 1.264  | 1.544  | -0.175 | -0.495 | 67434  | ANKRD33B | NM_026153_15_-1 |
| Mrpl10        | 5.912  | 5.905  | 5.780  | 5.955  | 5.696  | 5.660  | 5.556  | 5.732  | 5.570  | 5.774  | 107732 | MRPL10   | NM_026154_11_+1 |
| Ssr3          | 6.878  | 6.896  | 7.367  | 7.407  | 5.932  | 6.074  | 6.823  | 7.224  | 7.699  | 8.096  | 67437  | SSR3     | NM_026155_3_-1  |
| Xab2          | 5.922  | 6.068  | 6.224  | 6.230  | 6.566  | 6.519  | 6.521  | 6.412  | 6.665  | 6.355  | 67439  | XAB2     | NM_026156_8_-1  |
| Mtpap         | 5.263  | 5.203  | 5.232  | 5.188  | 5.196  | 5.192  | 5.260  | 5.225  | 5.503  | 5.470  | 67440  | MTPAP    | NM_026157_18_+1 |
| Isoc2b        | 5.262  | 2.935  | 3.987  | 1.816  | 3.976  | 1.992  | 3.651  | 1.427  | 3.327  | 1.371  | 67441  | NA       | NM_026158_7_-1  |
| Retsat        | 2.531  | 4.328  | 2.520  | 4.316  | 1.583  | 3.199  | 2.277  | 4.631  | 3.384  | 4.702  | 67442  | RETSAT   | NM_026159_6_+1  |
| Map1lc3b      | 9.168  | 8.977  | 8.086  | 8.015  | 8.003  | 8.140  | 8.376  | 8.459  | 8.411  | 8.388  | 67443  | MAP1LC3B | NM_026160_8_+1  |
| C1qtnf4       | -4.981 | -4.981 | -0.895 | -1.736 | -0.468 | -0.478 | -2.159 | -1.649 | -4.981 | -4.342 | 67445  | C1QTNF4  | NM_026161_2_+1  |
| Plxdc2        | 4.553  | 5.179  | 0.241  | -0.467 | -1.287 | -1.005 | 1.486  | 3.734  | 0.496  | 3.056  | 67448  | PLXDC2   | NM_026162_2_+1  |
| Pkp2          | -4.981 | -4.981 | -4.606 | -3.901 | -3.992 | -3.821 | -4.949 | -3.625 | -4.981 | -4.981 | 67451  | PKP2     | NM_026163_16_+1 |
| Pnpla8        | 4.886  | 5.056  | 5.589  | 5.816  | 5.103  | 5.004  | 5.644  | 5.503  | 5.581  | 6.051  | 67452  | PNPLA8   | NM_026164_12_+1 |
| Slc25a46      | 5.499  | 5.795  | 5.718  | 5.477  | 5.377  | 5.275  | 5.471  | 5.398  | 5.458  | 5.686  | 67453  | SLC25A46 | NM_026165_18_-1 |
| Ikbip         | 3.006  | 3.253  | 2.146  | 2.421  | 2.353  | 2.915  | 1.431  | 2.392  | 2.293  | 2.649  | 67454  | IKBIP    | NM_026166_10_+1 |
| Klhl13        | -4.981 | -3.844 | -4.936 | -3.530 | -4.905 | -3.919 | -4.916 | -2.815 | -4.981 | -4.981 | 67455  | KLHL13   | NM_026167_X_-1  |
| Ergic2        | 6.504  | 6.613  | 6.290  | 6.402  | 5.934  | 6.204  | 5.985  | 6.112  | 5.673  | 6.004  | 67456  | ERGIC2   | NM_026168_6_-1  |
| Frmd8         | 3.978  | 4.095  | 4.739  | 4.489  | 5.006  | 4.977  | 5.652  | 5.463  | 6.429  | 5.906  | 67457  | FRMD8    | NM_026169_19_-1 |

|               |        |        |        |        |        |        |        |        |        |        |        |               |                       |
|---------------|--------|--------|--------|--------|--------|--------|--------|--------|--------|--------|--------|---------------|-----------------------|
| Ergic1        | 6.871  | 6.555  | 5.511  | 5.441  | 5.600  | 5.707  | 5.480  | 5.679  | 4.382  | 4.279  | 67458  | ERGIC1        | NM_026170_17_+_1      |
| Nvl           | 4.417  | 4.599  | 5.062  | 5.235  | 4.914  | 5.158  | 4.750  | 4.865  | 3.960  | 4.507  | 67459  | NVL           | NM_026171_1_-_1       |
| Decr1         | 5.675  | 5.678  | 4.379  | 4.822  | 5.040  | 5.292  | 4.765  | 4.712  | 3.350  | 3.727  | 67460  | DECR1         | NM_026172_4_-_1       |
| Poc5          | 4.004  | 3.919  | 3.074  | 3.264  | 3.829  | 3.706  | 3.097  | 3.116  | 3.763  | 3.298  | 67463  | POC5          | NM_026173_13_+_1      |
| Entpd4        | 4.899  | 4.665  | 2.905  | 3.164  | 5.441  | 5.384  | 4.939  | 4.382  | 3.215  | 4.125  | 67464  | ENTPD4        | NM_026174_14_+_1      |
| Entpd4        | 3.028  | 2.955  | 0.195  | 2.039  | 2.525  | 2.876  | 1.759  | 2.374  | 2.330  | 1.394  | 67464  | ENTPD4        | NM_026174_dup1_14_+_2 |
| Sf3a1         | 5.044  | 5.240  | 5.345  | 5.492  | 5.586  | 5.489  | 5.387  | 5.424  | 5.249  | 5.307  | 67465  | SF3A1         | NM_026175_11_+_1      |
| Pdcl          | 5.029  | 5.279  | 4.918  | 5.007  | 4.346  | 4.692  | 4.529  | 4.834  | 4.813  | 5.328  | 67466  | PDCL          | NM_026176_2_-_1       |
| Gpalpp1       | 5.102  | 5.013  | 5.057  | 5.001  | 5.258  | 5.283  | 5.329  | 5.046  | 5.406  | 5.588  | 67467  | GPALPP1       | NM_026177_14_-_1      |
| Mmd           | 3.322  | 2.839  | 4.182  | 3.542  | 4.476  | 4.100  | 4.291  | 3.528  | 3.978  | 3.626  | 67468  | MMD           | NM_026178_11_+_1      |
| Abhd5         | 3.464  | 4.189  | 4.026  | 4.229  | 3.377  | 3.671  | 3.789  | 4.356  | 5.348  | 5.216  | 67469  | ABHD5         | NM_026179_9_+_1       |
| Gpatch1       | 3.720  | 3.865  | 3.864  | 3.502  | 3.294  | 3.510  | 3.348  | 3.370  | 3.971  | 3.726  | 67471  | GPATCH1       | NM_026181_7_-_1       |
| Mtfr1         | 4.638  | 4.938  | 4.396  | 4.786  | 3.750  | 4.259  | 3.944  | 4.377  | 5.335  | 5.149  | 67472  | MTFR1         | NM_026182_3_+_1       |
| Slc47a1       | -4.981 | -4.981 | -2.800 | -3.175 | -1.128 | -1.771 | -4.538 | -4.867 | -4.981 | -4.981 | 67473  | SLC47A1       | NM_026183_11_-_1      |
| Ero1lb        | 6.595  | 6.977  | 7.036  | 6.807  | 5.431  | 5.825  | 5.903  | 6.213  | 5.783  | 6.004  | 67475  | ERO1B         | NM_026184_13_+_1      |
| Abhd15        | 6.018  | 5.859  | 2.998  | 2.119  | 4.950  | 5.065  | 4.828  | 4.401  | 5.279  | 4.602  | 67477  | ABHD15        | NM_026185_11_+_1      |
| Cwc25         | 4.446  | 4.351  | 4.305  | 4.264  | 4.437  | 4.369  | 4.738  | 4.548  | 4.742  | 4.557  | 67480  | CWC25         | NM_026186_11_-_1      |
| Ankzf1        | 3.280  | 2.880  | 3.452  | 3.085  | 3.584  | 3.332  | 3.439  | 3.095  | 3.684  | 2.915  | 52231  | ANKZF1        | NM_026187_1_+_1       |
| Eepd1         | 7.041  | 6.754  | 4.148  | 3.109  | 4.361  | 3.265  | 3.965  | 3.478  | 4.438  | 4.761  | 67484  | EEPD1         | NM_026189_9_+_1       |
| Dhx40         | 5.153  | 4.932  | 5.778  | 4.572  | 4.844  | 4.577  | 6.044  | 5.719  | 6.268  | 6.327  | 67487  | DHX40         | NM_026191_11_-_1      |
| Calcoco1      | 6.119  | 7.492  | 3.732  | 4.272  | 3.163  | 4.181  | 3.254  | 4.804  | 4.529  | 5.309  | 67488  | CALCOCO1      | NM_026192_15_-_1      |
| Ap4b1         | 3.127  | 2.712  | 4.087  | 3.668  | 4.381  | 4.114  | 3.931  | 3.770  | 4.792  | 4.198  | 67489  | AP4B1         | NM_026193_3_+_1       |
| Ufl1          | 5.831  | 6.163  | 5.552  | 5.722  | 5.217  | 5.442  | 5.029  | 5.569  | 5.592  | 5.953  | 67490  | UFL1          | NM_026194_4_-_1       |
| Atic          | 4.271  | 4.512  | 4.708  | 4.719  | 3.342  | 3.249  | 3.773  | 3.891  | 2.753  | 2.205  | 108147 | ATIC          | NM_026195_1_+_1       |
| Mettl16       | 4.584  | 4.926  | 4.801  | 4.941  | 5.041  | 5.043  | 4.415  | 4.451  | 3.100  | 3.466  | 67493  | METTL16       | NM_026197_11_+_1      |
| Tmem167b      | 5.119  | 5.059  | 4.971  | 4.942  | 5.197  | 5.160  | 5.161  | 5.229  | 5.458  | 5.439  | 67495  | TMEM167B      | NM_026198_3_-_1       |
| Ccar1         | 6.355  | 6.504  | 6.611  | 6.634  | 6.794  | 6.657  | 6.524  | 6.534  | 6.231  | 6.479  | 67500  | CCAR1         | NM_026201_10_-_1      |
| Ccdc50        | 5.774  | 5.928  | 6.357  | 6.500  | 6.253  | 6.392  | 6.770  | 7.024  | 7.213  | 7.876  | 67501  | NA            | NM_026202_16_+_1      |
| Ahi1          | 4.247  | 4.589  | 2.159  | 1.708  | 2.440  | 2.887  | 1.593  | 2.084  | 1.625  | 1.402  | 52906  | AHI1          | NM_026203_10_+_1      |
| Saysd1        | 6.092  | 6.183  | 4.414  | 4.371  | 4.701  | 4.782  | 4.800  | 4.735  | 4.050  | 3.725  | 67509  | SAYSD1        | NM_026209_14_-_1      |
| Tvp23b        | 6.046  | 6.483  | 5.506  | 5.675  | 4.913  | 5.403  | 4.857  | 5.440  | 4.176  | 5.365  | 67510  | TVP23B        | NM_026210_11_+_1      |
| Tmed9         | 7.972  | 8.105  | 7.328  | 7.059  | 6.717  | 6.420  | 6.827  | 7.333  | 7.259  | 7.157  | 67511  | TMED9         | NM_026211_13_+_1      |
| Agpat2        | 5.000  | 5.017  | 2.467  | 2.370  | 1.793  | 2.250  | 3.742  | 4.050  | 5.157  | 4.946  | 67512  | AGPAT2        | NM_026212_2_-_1       |
| Ttc33         | 5.736  | 5.559  | 4.551  | 4.628  | 4.649  | 4.747  | 4.656  | 4.633  | 4.457  | 4.776  | 67515  | TTC33         | NM_026213_15_+_1      |
| Kctd4         | -0.112 | -0.426 | -0.494 | -3.134 | -0.667 | -2.583 | -1.558 | -1.791 | -1.601 | -0.748 | 67516  | KCTD4         | NM_026214_14_+_1      |
| Atg12         | 5.589  | 5.689  | 5.776  | 5.647  | 5.469  | 5.456  | 5.660  | 5.544  | 5.460  | 5.632  | 67526  | ATG12         | NM_026217_18_-_1      |
| Fgfr10p2      | 8.904  | 8.747  | 7.400  | 7.152  | 7.180  | 7.029  | 7.435  | 7.205  | 7.408  | 7.346  | 67529  | FGFR10P2      | NM_026218_6_+_1       |
| Uqcrb         | 8.518  | 8.229  | 8.591  | 7.778  | 7.715  | 7.432  | 8.194  | 7.710  | 6.966  | 6.826  | 67530  | UQCRB         | NM_026219_13_-_1      |
| Mfap1a        | 5.489  | 5.596  | 5.449  | 5.361  | 5.825  | 5.624  | 5.793  | 5.689  | 5.544  | 5.766  | 67532  | MFAP1         | NM_026220_2_-_1       |
| Ppfibp1       | 2.657  | 3.405  | 5.000  | 4.452  | 2.636  | 3.618  | 2.475  | 2.563  | 2.875  | 2.716  | 67533  | PPFIBP1       | NM_026221_6_+_1       |
| Ccdc39        | -2.889 | -4.981 | -4.973 | -4.709 | -4.040 | -3.972 | -4.959 | -4.489 | -4.018 | -3.319 | 51938  | CCDC39        | NM_026222_3_-_1       |
| Cog6          | 4.966  | 5.127  | 4.475  | 4.675  | 4.137  | 4.414  | 4.143  | 4.666  | 4.527  | 5.142  | 67542  | COG6          | NM_026225_3_-_1       |
| Slc39a8       | -4.315 | -3.508 | -2.166 | -2.836 | -2.262 | -2.258 | -4.088 | -4.650 | -4.701 | -4.320 | 67547  | SLC39A8       | NM_026228_3_+_1       |
| Gpr89         | 5.056  | 5.299  | 4.056  | 4.462  | 3.802  | 4.171  | 3.535  | 4.205  | 3.460  | 3.630  | 67549  | GPR89A GPR89B | NM_026229_3_-_1       |
| Gstcd         | 0.698  | 1.325  | 1.444  | 1.453  | 1.775  | 1.823  | 1.139  | 0.631  | 0.390  | -0.652 | 67553  | GSTCD         | NM_026231_3_-_1       |
| Slc25a30      | -0.408 | -0.607 | 0.694  | 0.090  | 0.460  | -0.180 | 0.387  | 0.638  | 2.449  | 2.426  | 67554  | SLC25A30      | NM_026232_14_-_1      |
| Pigm          | 4.154  | 3.963  | 4.617  | 4.515  | 4.437  | 4.356  | 4.376  | 4.458  | 4.808  | 4.835  | 67556  | PIGM          | NM_026234_1_+_1       |
| Wdr48         | 4.799  | 5.032  | 5.483  | 5.401  | 5.510  | 5.443  | 5.357  | 5.409  | 5.961  | 6.069  | 67561  | WDR48         | NM_026236_9_+_1       |
| Narf1         | 4.898  | 4.793  | 5.262  | 5.309  | 5.376  | 5.354  | 5.388  | 5.486  | 5.742  | 5.425  | 67563  | NARF1         | NM_026238_17_+_1      |
| Tmem35a       | -1.221 | -0.114 | -4.953 | -3.405 | -4.955 | -2.846 | -4.965 | -0.877 | -4.981 | -4.981 | 67564  | TMEM35A       | NM_026239_X_+_1       |
| Gramd3        | 5.582  | 4.591  | 6.700  | 6.653  | 5.774  | 5.329  | 5.442  | 5.540  | 4.330  | 4.843  | 107022 | GRAMD3        | NM_026240_18_+_1      |
| Ankrd39       | 4.480  | 4.550  | 3.890  | 4.153  | 3.930  | 3.917  | 3.443  | 3.577  | 3.329  | 2.881  | 109346 | ANKRD39       | NM_026241_1_-_1       |
| Mrfap1        | 8.780  | 9.534  | 7.665  | 8.078  | 7.734  | 7.964  | 7.902  | 8.288  | 7.898  | 8.280  | 67568  | MRFAP1        | NM_026242_5_-_1       |
| Slc39a9       | 4.032  | 4.222  | 4.263  | 4.330  | 4.303  | 4.117  | 4.245  | 4.400  | 5.257  | 5.478  | 328133 | SLC39A9       | NM_026244_12_+_1      |
| Mrpl49        | 5.338  | 5.705  | 5.204  | 5.349  | 5.106  | 5.306  | 5.083  | 5.289  | 4.536  | 4.680  | 18120  | MRPL49        | NM_026246_19_-_1      |
| Alg13         | 2.931  | 2.826  | 2.708  | 2.228  | 1.970  | 1.881  | 2.548  | 2.378  | 2.359  | 2.403  | 67574  | NA            | NM_026247_X_+_1       |
| Gin1          | 3.395  | 3.204  | 3.023  | 3.175  | 3.139  | 2.894  | 2.647  | 2.435  | 2.450  | 2.669  | 252876 | GIN1          | NM_026250_1_+_1       |
| Patl2         | -0.285 | 0.255  | -2.729 | -1.757 | -2.049 | -2.939 | -4.965 | -2.383 | -4.981 | -4.981 | 67578  | PATL2         | NM_026251_2_-_1       |
| Cpeb4         | 0.438  | 0.652  | -0.736 | -0.476 | -0.311 | -0.942 | 0.488  | -0.774 | -1.973 | -1.629 | 67579  | CPEB4         | NM_026252_11_+_1      |
| Lrrc18        | -0.365 | -0.211 | 3.759  | 3.627  | 2.717  | 2.891  | 1.294  | 1.355  | 0.840  | 0.604  | 67580  | LRRC18        | NM_026253_14_+_1      |
| Tbc1d23       | 4.750  | 4.875  | 5.403  | 5.537  | 4.862  | 5.135  | 5.253  | 5.242  | 5.421  | 6.492  | 67581  | TBC1D23       | NM_026254_16_-_1      |
| Slc25a26      | 2.787  | 2.814  | 4.582  | 3.890  | 2.804  | 2.704  | 2.796  | 2.283  | 2.153  | 2.000  | 67582  | SLC25A26      | NM_026255_6_+_1       |
| Ubxn11        | 1.682  | 1.590  | 1.398  | 1.199  | 2.310  | 2.647  | 1.886  | 2.024  | 1.080  | 0.609  | 67586  | UBXN11        | NM_026257_4_+_1       |
| Rnf41         | -4.957 | -4.981 | -3.175 | -3.513 | -4.692 | -4.629 | -4.949 | -3.832 | -4.874 | -4.977 | 67588  | RNF41         | NM_026259_10_+_1      |
| Tctn3         | 2.946  | 3.011  | 2.756  | 2.717  | 2.970  | 2.929  | 2.379  | 2.528  | 2.698  | 3.264  | 67590  | TCTN3         | NM_026260_19_-_1      |
| 4930519G04Rik | -4.981 | -3.143 | -2.558 | -2.550 | -1.755 | -3.164 | -2.634 | -2.678 | -2.967 | -2.686 | 67593  | NA            | NM_026263_5_+_1       |
| Necap1        | 4.787  | 4.654  | 4.300  | 4.219  | 4.922  | 4.883  | 4.928  | 5.224  | 5.816  | 5.782  | 67602  | NECAP1        | NM_026267_6_+_1       |
| Dusp6         | 4.697  | 4.760  | 4.653  | 4.896  | 5.914  | 6.013  | 7.073  | 7.459  | 8.914  | 8.969  | 67603  | DUSP6         | NM_026268_10_+_1      |
| Get4          | 6.403  | 6.306  | 5.973  | 6.149  | 6.233  | 6.266  | 6.134  | 6.150  | 5.979  | 5.772  | 67604  | GET4          | NM_026269_5_+_1       |
| Akt1s1        | 2.513  | 2.550  | 2.103  | 2.508  | 1.772  | 2.389  | 1.438  | 2.672  | 3.320  | 3.081  | 67605  | AKT1S1        | NM_026270_7_+_1       |
| Narf          | 3.786  | 4.222  | 4.789  | 4.985  | 5.126  | 5.408  | 4.916  | 5.199  | 5.369  | 5.463  | 67608  | NARF          | NM_026272_11_+_1      |
| 4930453N24Rik | 5.761  | 5.573  | 4.907  | 4.970  | 5.007  | 4.948  | 4.851  | 5.024  | 5.118  | 4.827  | 67609  | C3orf38       | NM_026273_16_-_1      |
| Rspry1        | 4.489  | 4.508  | 5.440  | 5.216  | 5.155  | 5.192  | 5.066  | 5.072  | 5.277  | 5.470  | 67610  | RSRPY1        | NM_026274_8_+_1       |
| Ube2r2        | 6.714  | 6.757  | 6.056  | 6.181  | 5.904  | 6.169  | 6.278  | 6.615  | 6.531  | 6.548  | 67615  | UBE2R2        | NM_026275_4_+_1       |

















|               |        |        |        |        |        |        |        |        |        |        |        |                   |                 |
|---------------|--------|--------|--------|--------|--------|--------|--------|--------|--------|--------|--------|-------------------|-----------------|
| Ypel5         | 7.788  | 7.862  | 6.776  | 6.748  | 6.882  | 7.043  | 7.009  | 7.101  | 7.358  | 7.345  | 383295 | YPEL5             | NM_027166_17_+1 |
| Hddc2         | 5.629  | 5.480  | 4.695  | 4.749  | 4.294  | 4.174  | 4.229  | 4.052  | 3.463  | 2.498  | 69692  | HDDC2             | NM_027168_10_+1 |
| Camsap3       | 0.836  | -0.562 | -0.995 | -2.239 | -2.570 | -0.061 | -2.853 | -2.195 | -4.981 | -4.156 | 69697  | CAMSAP3           | NM_027171_8_+1  |
| Slc52a3       | 2.678  | -3.893 | -0.678 | -4.446 | -4.239 | -4.205 | -4.227 | 0.592  | 0.892  | 3.956  | 69698  | SLC52A3           | NM_027172_2_+1  |
| Ndufaf1       | 4.995  | 4.931  | 4.588  | 4.563  | 4.637  | 4.287  | 4.269  | 4.286  | 3.617  | 3.509  | 69702  | NDUFAF1           | NM_027175_2_-1  |
| Tecr          | 3.283  | 3.437  | 1.568  | 1.868  | 1.814  | 1.881  | 1.684  | 1.666  | 0.911  | 0.929  | 106529 | TECR              | NM_027179_8_-1  |
| Arap1         | -4.495 | -4.258 | 0.142  | 1.615  | -1.398 | -1.134 | 0.316  | 0.951  | 5.785  | 6.398  | 69710  | ARAP1             | NM_027180_7_+1  |
| Pin4          | 5.753  | 5.574  | 5.346  | 5.225  | 5.296  | 5.219  | 5.852  | 5.412  | 4.738  | 4.297  | 69713  | PIN4              | NM_027181_X_+1  |
| Trip13        | -0.003 | 0.667  | 2.492  | 2.813  | 2.758  | 2.025  | 2.495  | 2.174  | 0.853  | 0.512  | 69716  | TRIP13            | NM_027182_13_-1 |
| Ipmk          | 3.366  | 3.640  | 3.994  | 3.949  | 3.911  | 3.815  | 4.594  | 4.671  | 6.593  | 6.682  | 69718  | IPMK              | NM_027184_10_+1 |
| Def6          | 4.841  | 4.632  | 3.697  | 3.725  | 4.809  | 4.806  | 4.887  | 4.682  | 5.108  | 4.361  | 23853  | DEF6              | NM_027185_17_+1 |
| Rpain         | 5.343  | 5.372  | 4.714  | 4.293  | 4.775  | 4.909  | 4.838  | 4.704  | 4.293  | 4.428  | 69723  | RPAIN             | NM_027186_11_+1 |
| Rnaseh2a      | 5.626  | 5.433  | 4.792  | 4.501  | 4.635  | 4.746  | 4.934  | 4.927  | 4.362  | 4.029  | 69724  | RNASEH2A          | NM_027187_8_-1  |
| Smyd3         | 4.243  | 4.278  | 3.333  | 3.359  | 4.054  | 3.727  | 3.870  | 3.632  | 3.697  | 3.125  | 69726  | SMYD3             | NM_027188_1_-1  |
| Gemin7        | 6.454  | 6.539  | 6.203  | 5.959  | 5.903  | 5.943  | 5.980  | 6.066  | 5.729  | 5.511  | 69731  | GEMIN7            | NM_027189_7_-1  |
| Nup37         | 4.071  | 3.917  | 3.267  | 3.436  | 3.689  | 3.304  | 3.368  | 3.547  | 2.853  | 2.981  | 69736  | NUP37             | NM_027191_10_+1 |
| Ttl           | 0.836  | 2.251  | 1.441  | 2.662  | 0.885  | 2.741  | 0.338  | 2.799  | 0.468  | 2.431  | 69737  | TTL               | NM_027192_2_+1  |
| Dph5          | 4.905  | 4.913  | 4.836  | 5.040  | 4.838  | 4.722  | 4.366  | 4.787  | 3.434  | 3.434  | 69740  | DPH5              | NM_027193_3_+1  |
| Tm2d2         | 7.202  | 7.240  | 7.086  | 7.153  | 6.672  | 6.917  | 6.535  | 6.810  | 6.554  | 6.781  | 69742  | TM2D2             | NM_027194_8_+1  |
| Casz1         | -0.454 | 0.181  | 0.758  | 0.456  | 0.046  | -0.591 | 0.220  | -1.186 | 2.180  | -1.417 | 69743  | CASZ1             | NM_027195_4_+1  |
| Pold4         | 6.367  | 6.351  | 6.133  | 6.079  | 5.831  | 6.077  | 5.943  | 6.031  | 5.373  | 5.239  | 69745  | POLD4             | NM_027196_19_+1 |
| Zswim7        | 3.903  | 4.407  | 3.570  | 3.714  | 3.467  | 3.866  | 4.038  | 3.343  | 2.939  | 2.553  | 69747  | ZSWIM7            | NM_027198_11_-1 |
| Zfp511        | 5.483  | 5.620  | 5.249  | 5.317  | 5.227  | 5.372  | 4.867  | 4.831  | 4.083  | 4.122  | 69752  | ZNF511            | NM_027201_7_+1  |
| Leng1         | 5.065  | 4.692  | 3.981  | 4.061  | 4.330  | 4.284  | 4.325  | 4.173  | 3.618  | 3.722  | 69757  | LENG1             | NM_027203_7_-1  |
| Mrpl12        | 6.487  | 6.234  | 5.977  | 6.064  | 5.856  | 5.843  | 5.962  | 6.022  | 4.972  | 4.756  | 56282  | MRPL12            | NM_027204_11_+1 |
| Tnfaip8l2     | 7.494  | 7.188  | 7.235  | 7.166  | 6.815  | 6.847  | 7.368  | 7.382  | 7.819  | 7.742  | 69769  | TNFAIP8L2         | NM_027206_3_-1  |
| 1600002K03Rik | 5.006  | 4.919  | 4.280  | 4.089  | 3.733  | 3.794  | 4.294  | 4.007  | 3.640  | 3.525  | 69770  | C19orf24          | NM_027207_10_+1 |
| Ms4a6b        | 3.074  | 5.683  | 5.541  | 5.148  | 7.923  | 7.181  | 8.486  | 8.367  | 8.807  | 8.720  | 69774  | NA                | NM_027209_19_+1 |
| Anxa13        | -4.981 | -4.981 | -4.973 | -2.632 | -3.626 | -2.604 | -4.842 | -4.582 | -4.981 | -4.981 | 69787  | ANXA13            | NM_027211_15_-1 |
| Med30         | 6.431  | 6.407  | 6.077  | 5.881  | 7.052  | 6.384  | 6.438  | 5.860  | 4.926  | 4.900  | 69790  | MED30             | NM_027212_15_+1 |
| Med6          | 5.459  | 5.413  | 4.254  | 4.193  | 4.415  | 4.674  | 4.597  | 4.543  | 4.049  | 4.035  | 69792  | MED6              | NM_027213_12_-1 |
| Tmem147       | 8.115  | 8.085  | 6.568  | 6.578  | 6.935  | 7.035  | 6.739  | 6.776  | 6.082  | 6.114  | 69804  | TMEM147           | NM_027215_7_-1  |
| Slc39a11      | 5.685  | 5.801  | 4.890  | 4.869  | 4.587  | 4.691  | 4.800  | 5.091  | 5.840  | 5.462  | 69806  | SLC39A11          | NM_027216_11_-1 |
| 1810046K07Rik | -4.981 | -4.981 | -4.866 | -2.803 | -4.716 | -2.677 | -4.626 | -1.825 | -4.981 | -2.261 | 69809  | C11orf53          | NM_027217_9_-1  |
| Clec4b1       | -0.188 | -0.919 | -2.720 | -0.687 | 0.548  | 1.727  | 3.881  | 4.912  | 1.532  | 2.503  | 69810  | CLEC4C            | NM_027218_6_+1  |
| Cdc42ep1      | -4.981 | -4.981 | -2.475 | -3.212 | -4.875 | -4.155 | -4.096 | -2.676 | -4.981 | -2.480 | 104445 | CDC42EP1          | NM_027219_15_+1 |
| Prss32        | -4.981 | -4.981 | -3.444 | -2.658 | -4.981 | -4.981 | -4.981 | -4.981 | -4.981 | -4.981 | 69814  | NA                | NM_027220_17_+1 |
| Krtcap3       | -0.297 | -0.671 | 3.159  | 3.863  | 2.091  | 2.676  | 1.426  | 1.273  | -0.130 | -0.797 | 69815  | KRTCAP3           | NM_027221_5_+1  |
| Mzb1          | 8.362  | 8.254  | 0.388  | 3.386  | 1.172  | 4.651  | 4.467  | 7.547  | -1.032 | 0.760  | 69816  | MZB1              | NM_027222_18_-1 |
| Cinp          | 0.290  | 1.341  | -0.135 | -0.470 | -0.430 | -0.264 | 0.642  | -0.289 | 0.502  | -0.586 | 67236  | CINP              | NM_027223_12_-1 |
| Coill1        | 4.002  | 3.560  | 0.726  | 1.389  | -1.536 | -0.115 | -0.755 | 0.662  | -2.143 | -2.158 | 319876 | COBL1             | NM_027225_2_-1  |
| Fytdt1        | 4.812  | 5.244  | 6.066  | 6.263  | 5.556  | 5.660  | 5.275  | 5.333  | 4.625  | 5.191  | 69823  | FYTTD1            | NM_027226_16_+1 |
| Zmynd8        | 1.582  | 1.276  | 0.580  | -1.680 | 2.079  | 0.837  | 0.218  | -0.772 | 2.167  | 1.252  | 228880 | ZMYND8            | NM_027230_2_-1  |
| Polr2f        | 5.856  | 5.916  | 5.298  | 5.300  | 5.268  | 5.536  | 5.786  | 5.719  | 4.979  | 4.639  | 69833  | POLR2F            | NM_027231_15_+1 |
| Eif1ad        | 6.483  | 6.047  | 5.611  | 5.706  | 5.802  | 5.650  | 5.606  | 5.389  | 4.966  | 4.481  | 69860  | EIF1AD            | NM_027236_19_+1 |
| Ttc39b        | -0.018 | -2.108 | 5.453  | 5.547  | 4.588  | 4.626  | 4.447  | 4.073  | 2.142  | 2.409  | 69863  | TTCC39B           | NM_027238_4_-1  |
| 1810065E05Rik | 4.487  | 1.353  | -3.832 | -3.478 | -4.936 | -4.936 | -4.932 | -4.899 | -4.981 | -4.981 | 69864  | NA                | NM_027239_11_+1 |
| Polr3gl       | 2.262  | 2.425  | 0.476  | 1.488  | 0.884  | 1.996  | 1.060  | 1.838  | 2.438  | 2.665  | 69870  | POLR3GL           | NM_027241_3_-1  |
| Ppp1r35       | 4.680  | 4.794  | 4.220  | 4.089  | 4.171  | 4.093  | 4.265  | 4.218  | 4.033  | 3.787  | 69871  | PPP1R35           | NM_027242_5_+1  |
| Ndufa11       | 7.691  | 7.608  | 6.421  | 6.460  | 6.593  | 6.682  | 6.978  | 6.857  | 6.362  | 6.078  | 69875  | NDUFA11           | NM_027244_17_+1 |
| Snrpf         | 6.777  | 6.487  | 6.807  | 6.400  | 6.599  | 6.332  | 6.857  | 6.346  | 4.924  | 4.474  | 69878  | SNRPF             | NM_027246_10_-1 |
| Zfp219        | 1.513  | -3.614 | 1.178  | -0.319 | -4.361 | -2.411 | -3.966 | 1.068  | -4.225 | -4.533 | 69890  | ZNF219            | NM_027248_14_-1 |
| Tlcd2         | 5.258  | 6.215  | 3.846  | 4.697  | 3.021  | 4.496  | 2.235  | 3.926  | 1.244  | 3.023  | 380712 | TLCD2             | NM_027249_11_+1 |
| Coa7          | 3.973  | 4.132  | 3.692  | 3.703  | 3.312  | 3.395  | 3.447  | 3.568  | 3.403  | 3.155  | 69893  | COA7              | NM_027250_4_+1  |
| 2010107G23Rik | -2.388 | -1.991 | -2.634 | -1.322 | -0.989 | 1.055  | -3.849 | -2.690 | -4.981 | -4.981 | 69894  | C10orf35          | NM_027251_10_-1 |
| Ints4         | 5.230  | 5.267  | 5.926  | 5.770  | 5.382  | 5.217  | 5.154  | 5.436  | 4.618  | 4.965  | 101861 | INTS4             | NM_027256_7_+1  |
| Nabp2         | 5.980  | 5.752  | 5.287  | 5.275  | 5.553  | 5.395  | 5.349  | 5.309  | 5.026  | 4.656  | 69917  | NABP2             | NM_027257_10_-1 |
| Rnf157        | 3.874  | 3.720  | 5.013  | 3.311  | 2.981  | 1.731  | 2.703  | 2.374  | 2.664  | 0.401  | 217340 | RNF157            | NM_027258_11_-1 |
| Polr2i        | 5.863  | 5.693  | 4.904  | 4.790  | 4.533  | 4.679  | 5.141  | 4.945  | 4.266  | 4.140  | 69920  | POLR2I            | NM_027259_7_+1  |
| Vrk2          | 5.848  | 5.564  | 7.538  | 7.451  | 6.831  | 6.896  | 6.358  | 6.089  | 5.625  | 6.000  | 69922  | VRK2              | NM_027260_11_-1 |
| Taf1d         | 4.780  | 3.673  | 3.766  | 4.002  | 3.541  | 3.353  | 3.524  | 3.360  | 2.207  | 2.747  | 75316  | TAF1D             | NM_027261_9_+1  |
| Apitd1        | 0.752  | 1.578  | 2.268  | 2.359  | 3.120  | 2.939  | 2.564  | 2.806  | -0.223 | -0.085 | 69928  | APITD1-CORT CENIN | NM_027263_4_-1  |
| Zfp715        | 3.470  | 2.962  | 3.117  | 3.192  | 3.445  | 3.644  | 3.690  | 3.478  | 3.812  | 4.169  | 69930  | ZNF175            | NM_027264_7_-1  |
| Trmt10b       | 3.043  | 3.385  | 3.020  | 3.247  | 3.259  | 3.261  | 3.029  | 3.310  | 2.380  | 2.597  | 69934  | TRMT10B           | NM_027266_4_+1  |
| Scrn1         | 4.562  | 0.549  | -3.105 | -4.972 | -4.981 | -4.981 | -4.956 | -4.969 | -4.981 | -4.981 | 69938  | SCRN1             | NM_027268_6_-1  |
| Dnaaf2        | 4.287  | 3.915  | 3.806  | 3.770  | 4.038  | 3.851  | 3.916  | 3.991  | 3.598  | 3.120  | 109065 | DNAAF2            | NM_027269_12_-1 |
| Exoc1         | -1.667 | -4.155 | -4.559 | -4.742 | -4.659 | -4.928 | -4.320 | -4.768 | -2.383 | -4.916 | 69940  | EXOC1             | NM_027270_5_+1  |
| D3Erttd751e   | -0.398 | -4.854 | -0.809 | 0.323  | -3.568 | -2.847 | -2.569 | -0.182 | -1.217 | -4.434 | 73852  | C4orf33           | NM_027271_3_+1  |
| Ptcd3         | 4.753  | 5.253  | 5.170  | 5.242  | 4.959  | 5.114  | 4.862  | 4.833  | 4.505  | 4.447  | 69956  | PTCD3             | NM_027275_6_-1  |
| Cdc16         | 5.874  | 6.037  | 5.265  | 5.462  | 5.294  | 5.179  | 5.142  | 5.397  | 5.586  | 5.549  | 69957  | CDC16             | NM_027276_8_+1  |
| Rpp25l        | 5.090  | 5.145  | 4.073  | 4.117  | 3.936  | 3.826  | 4.213  | 4.093  | 3.648  | 3.488  | 69961  | RPP25L            | NM_027278_4_-1  |
| Mettl18       | 4.012  | 4.029  | 2.229  | 2.574  | 2.010  | 1.982  | 2.021  | 2.059  | 1.793  | 1.390  | 69962  | METTL18           | NM_027279_1_+1  |
| Nkd1          | -2.273 | -4.528 | -4.977 | -4.973 | -2.047 | -3.260 | -4.459 | -4.993 | -4.918 | -4.903 | 93960  | NKD1              | NM_027280_8_+1  |
| Spaca9        | 5.234  | 5.189  | -0.619 | -1.107 | -3.514 | -3.770 | -0.235 | 0.888  | 1.682  | 1.999  | 69987  | SPACA9            | NM_027283_2_-1  |

|               |        |        |        |        |        |        |        |        |        |        |        |          |                 |
|---------------|--------|--------|--------|--------|--------|--------|--------|--------|--------|--------|--------|----------|-----------------|
| Ace2          | -4.981 | -4.981 | 0.119  | 0.532  | -4.932 | -3.286 | -4.918 | -4.923 | -4.981 | -4.981 | 70008  | ACE2     | NM_027286_X_+1  |
| Dnajb4        | -0.098 | 0.637  | -0.135 | 0.110  | 0.565  | 0.794  | 1.268  | 0.964  | 0.679  | 1.144  | 67035  | DNAJB4   | NM_027287_3_-1  |
| Manba         | 4.752  | 4.853  | 4.477  | 3.832  | 4.486  | 4.152  | 4.545  | 4.628  | 5.859  | 5.592  | 110173 | MANBA    | NM_027288_3_+1  |
| Nt5dc2        | -0.079 | 1.317  | 0.964  | 2.054  | 2.804  | 2.916  | 1.445  | 2.933  | 3.778  | 3.436  | 70021  | NT5DC2   | NM_027289_14_+1 |
| Mcm10         | -1.805 | -2.895 | 1.885  | 1.943  | 2.462  | 1.814  | 1.533  | 2.087  | 1.284  | 1.007  | 70024  | MCM10    | NM_027290_2_-1  |
| Tspo2         | -4.981 | -4.981 | -1.942 | -0.155 | -1.404 | -0.400 | -0.378 | -0.201 | -3.531 | -3.166 | 70026  | TSP02    | NM_027292_17_-1 |
| Dopey2        | 3.766  | 3.817  | 4.207  | 3.925  | 3.836  | 3.625  | 3.912  | 3.767  | 4.368  | 4.587  | 70028  | DOPEY2   | NM_027293_16_+1 |
| Cmtm8         | 0.542  | 0.652  | 2.950  | 3.201  | 1.481  | 1.788  | 1.574  | 1.016  | -1.702 | -0.464 | 70031  | CMTM8    | NM_027294_9_-1  |
| Rab28         | 5.641  | 5.754  | 5.053  | 4.884  | 4.984  | 4.836  | 4.911  | 4.839  | 4.925  | 4.686  | 100972 | RAB28    | NM_027295_5_-1  |
| Trnt1         | 4.904  | 4.850  | 4.285  | 4.283  | 4.398  | 4.309  | 4.753  | 4.447  | 4.500  | 4.561  | 70047  | TRNT1    | NM_027296_6_+1  |
| Prpf4         | 4.406  | 4.360  | 4.454  | 4.437  | 4.703  | 4.621  | 4.614  | 4.667  | 4.283  | 4.200  | 70052  | PRPF4    | NM_027297_4_+1  |
| Ccdc89        | -4.981 | -4.981 | -3.046 | -1.519 | -3.330 | -1.940 | -3.983 | -2.631 | -2.022 | -1.778 | 70054  | CCDC89   | NM_027298_7_+1  |
| Golm1         | 0.189  | -0.370 | -0.383 | -0.727 | -2.061 | -1.403 | -0.659 | 0.744  | 0.384  | 0.971  | 105348 | GOLM1    | NM_027307_13_-1 |
| Igsf23        | -1.455 | -1.264 | -3.804 | -1.405 | -4.967 | -3.196 | -2.525 | -1.394 | -2.989 | -1.509 | 70080  | IGSF23   | NM_027308_7_-1  |
| Lysmd2        | 5.616  | 5.953  | 3.087  | 3.112  | 7.079  | 7.502  | 4.713  | 3.989  | -3.088 | -4.227 | 70082  | LYSMD2   | NM_027309_9_+1  |
| Meaf6         | 3.533  | 3.578  | 3.635  | 3.612  | 3.410  | 3.469  | 3.218  | 2.644  | 1.811  | 1.912  | 70088  | MEAF6    | NM_027310_4_+1  |
| March5        | 6.199  | 6.215  | 6.201  | 6.487  | 5.959  | 6.372  | 6.093  | 6.019  | 6.034  | 6.059  | 69104  | MARCH5   | NM_027314_19_+1 |
| Ube2q1        | 5.900  | 5.921  | 6.603  | 6.592  | 6.727  | 6.604  | 6.607  | 6.258  | 6.331  | 6.331  | 70093  | UBE2Q1   | NM_027315_3_+1  |
| Znhit1        | 5.343  | 5.141  | 4.435  | 4.500  | 4.155  | 4.433  | 5.170  | 4.865  | 5.608  | 5.025  | 70103  | ZNHT1    | NM_027318_5_-1  |
| Ifi35         | 7.597  | 7.643  | 7.560  | 7.724  | 7.506  | 7.529  | 7.032  | 7.030  | 6.567  | 6.334  | 70110  | IFI35    | NM_027320_11_+1 |
| Lrrc39        | -0.223 | -1.390 | -2.779 | -2.117 | -1.743 | -3.040 | -1.670 | -2.036 | -1.625 | -2.001 | 109245 | LRRC39   | NM_027321_3_+1  |
| Prrg1         | -3.926 | -4.981 | -3.734 | -4.353 | -1.589 | -3.420 | -2.835 | -4.512 | -0.790 | -1.240 | 546336 | PRRG1    | NM_027322_X_-1  |
| Srrd          | 4.907  | 4.418  | 4.396  | 4.424  | 4.470  | 4.536  | 4.063  | 4.196  | 3.841  | 3.620  | 70118  | SRRD     | NM_027323_5_-1  |
| Sfxn1         | 6.222  | 6.370  | 6.315  | 6.464  | 5.496  | 5.792  | 5.185  | 5.634  | 4.326  | 4.244  | 14057  | SFXN1    | NM_027324_13_+1 |
| Milt3         | 1.144  | 1.248  | 3.877  | 4.063  | -0.036 | 1.163  | 1.453  | 3.307  | 2.202  | 2.413  | 70122  | MILT3    | NM_027326_4_-1  |
| 2210013O21Rik | 5.015  | 5.375  | 5.902  | 5.683  | 5.943  | 5.833  | 5.993  | 5.506  | 4.390  | 4.378  | 70123  | NA       | NM_027327_X_+1  |
| Prpf31        | 5.984  | 5.718  | 5.791  | 5.742  | 5.696  | 5.790  | 5.736  | 5.750  | 5.593  | 5.093  | 68988  | PRPF31   | NM_027328_7_+1  |
| Rpf1          | 3.661  | 2.791  | 2.311  | 1.776  | 2.641  | 2.515  | 2.453  | 2.002  | 2.009  | 1.850  | 70285  | RPF1     | NM_027332_3_-1  |
| Mettl7a1      | 4.114  | 4.675  | 4.144  | 3.948  | 3.957  | 4.268  | 4.766  | 4.541  | 4.845  | 5.002  | 70152  | METTL7A  | NM_027334_15_+1 |
| 2210016F16Rik | 7.302  | 7.236  | 6.622  | 6.928  | 6.294  | 6.623  | 6.229  | 6.387  | 5.849  | 5.997  | 70153  | C9orf64  | NM_027335_13_-1 |
| Vps36         | 5.667  | 5.519  | 6.073  | 6.017  | 5.549  | 5.380  | 5.879  | 5.593  | 5.231  | 5.300  | 70160  | VPS36    | NM_027338_8_+1  |
| Lipn          | -3.563 | -4.981 | -4.981 | -4.981 | -4.976 | -4.887 | -4.958 | -4.941 | -4.981 | -2.431 | 70166  | LIPN     | NM_027340_19_+1 |
| Dzip3         | 2.615  | 3.306  | 2.076  | 2.874  | 1.821  | 1.363  | 1.984  | 2.116  | 1.278  | 1.978  | 224170 | DZIP3    | NM_027341_16_-1 |
| Fam162a       | 5.525  | 5.463  | 5.318  | 5.688  | 5.070  | 5.363  | 5.212  | 5.386  | 3.252  | 3.560  | 70186  | FAM162A  | NM_027342_16_-1 |
| Taco1         | 2.234  | 2.576  | 2.499  | 2.229  | 2.033  | 2.171  | 2.216  | 2.088  | 1.972  | 2.364  | 70207  | TACO1    | NM_027346_11_+1 |
| Med23         | 3.189  | 3.863  | 3.503  | 3.962  | 3.942  | 3.783  | 3.880  | 3.942  | 3.846  | 4.192  | 70208  | MED23    | NM_027347_10_+1 |
| Pmvk          | 1.954  | 3.342  | 0.755  | -1.159 | 1.852  | 2.099  | 0.850  | 0.301  | -1.008 | -1.321 | 68603  | PMVK     | NM_027348_3_+1  |
| Rbm25         | 7.701  | 7.812  | 7.800  | 7.655  | 7.943  | 7.957  | 7.687  | 7.411  | 6.761  | 6.682  | 67039  | NA       | NM_027349_12_+1 |
| Nars          | 5.432  | 5.545  | 6.060  | 5.926  | 5.483  | 5.282  | 5.944  | 5.106  | 5.741  | 5.720  | 70223  | NARS     | NM_027350_18_-1 |
| Ppil3         | 3.969  | 4.439  | 3.037  | 2.990  | 2.891  | 3.161  | 3.404  | 2.904  | 1.555  | 1.681  | 70225  | PPIL3    | NM_027351_1_-1  |
| Gorasp2       | 7.322  | 7.192  | 6.934  | 6.944  | 6.457  | 6.374  | 6.638  | 6.834  | 7.123  | 7.082  | 70231  | GORASP2  | NM_027352_2_+1  |
| Cd2bp2        | 5.267  | 4.961  | 4.948  | 5.026  | 5.578  | 5.258  | 5.185  | 4.994  | 4.967  | 4.429  | 70233  | CD2BP2   | NM_027353_7_-1  |
| Poc1a         | 2.076  | 2.841  | 2.233  | 2.147  | 3.188  | 2.473  | 2.457  | 2.026  | 2.362  | 1.499  | 70235  | POC1A    | NM_027354_9_+1  |
| Rnf168        | 4.474  | 4.216  | 4.112  | 3.952  | 4.743  | 4.485  | 4.618  | 4.426  | 4.278  | 4.619  | 70238  | RNF168   | NM_027355_16_+1 |
| Ufsp1         | 2.184  | 1.757  | -0.696 | 0.151  | 0.716  | 0.216  | 0.480  | -0.077 | 0.880  | -0.269 | 70240  | UFSP1    | NM_027356_5_+1  |
| Psmd1         | 6.319  | 6.473  | 6.918  | 7.148  | 6.670  | 6.655  | 6.578  | 6.819  | 6.481  | 6.713  | 70247  | PSMD1    | NM_027357_1_+1  |
| 2010107E04Rik | 7.719  | 7.462  | 7.267  | 7.313  | 6.978  | 7.036  | 7.184  | 6.937  | 6.179  | 6.099  | 70257  | C14orf2  | NM_027360_12_-1 |
| Chp2          | -2.147 | -4.981 | -4.278 | -4.929 | -3.687 | -4.867 | -3.247 | -2.602 | -2.569 | -4.981 | 70261  | CHP2     | NM_027363_7_+1  |
| Rpf1          | 6.434  | 6.460  | 5.664  | 5.646  | 5.766  | 5.611  | 5.694  | 5.395  | 5.176  | 4.901  | 70285  | RPF1     | NM_027371_3_-1  |
| Alkbh7        | -0.229 | 0.856  | -0.334 | -1.336 | -0.754 | -0.671 | -1.283 | -1.198 | -0.850 | -0.577 | 66400  | ALKBH7   | NM_027372_17_+1 |
| Afap1         | -0.603 | -0.849 | 3.430  | 3.009  | 0.614  | 0.880  | -0.438 | 0.968  | 2.449  | 2.609  | 70292  | AFAF1    | NM_027373_5_+1  |
| Ppil3         | -0.343 | -0.157 | -0.004 | -1.501 | -1.015 | -2.754 | -0.465 | -1.626 | -0.891 | -1.361 | 70225  | PPIL3    | NM_027374_1_-1  |
| Gcc2          | 5.131  | 5.194  | 5.582  | 5.397  | 5.231  | 5.363  | 5.265  | 4.989  | 4.129  | 4.244  | 70297  | GCC2     | NM_027375_10_+1 |
| Fuz           | 3.503  | 3.524  | 2.420  | 2.510  | 2.960  | 3.369  | 2.496  | 2.813  | 2.294  | 2.086  | 70300  | FUZ      | NM_027376_7_+1  |
| Far1          | 6.193  | 6.276  | 7.260  | 7.338  | 7.111  | 7.148  | 6.863  | 7.128  | 7.422  | 8.293  | 67420  | FAR1     | NM_027379_7_+1  |
| Cactin        | 4.034  | 4.261  | 4.110  | 4.106  | 4.404  | 4.203  | 4.399  | 4.474  | 5.081  | 4.683  | 70312  | CACTIN   | NM_027381_10_+1 |
| Hdac8         | 3.445  | 2.832  | 3.239  | 3.093  | 3.262  | 3.186  | 3.005  | 3.011  | 2.779  | 2.684  | 70315  | HDAC8    | NM_027382_X_-1  |
| Tet1          | 0.847  | 2.296  | 0.263  | -0.751 | 1.203  | -3.220 | -0.320 | -1.230 | -1.569 | -2.076 | 52463  | TET1     | NM_027384_10_-1 |
| Pigw          | -0.675 | -1.904 | 0.687  | 0.467  | -1.181 | 0.078  | -1.299 | -2.516 | -1.142 | -0.742 | 70325  | PIGW     | NM_027388_11_-1 |
| Gon4l         | 4.229  | 4.062  | 3.054  | 2.846  | 3.954  | 4.316  | 3.836  | 2.433  | 2.667  | 0.435  | 76022  | GON4L    | NM_027389_3_+1  |
| Ube2cbp       | -0.332 | 0.470  | 0.873  | 0.387  | 0.362  | 0.118  | 0.519  | 0.621  | -2.100 | -0.890 | 70348  | UBE3D    | NM_027394_9_-1  |
| Basp1         | 5.148  | 5.400  | 6.328  | 6.767  | 6.464  | 6.763  | 5.727  | 5.234  | 0.459  | 0.337  | 70350  | BASP1    | NM_027395_15_-1 |
| Isl2          | -4.981 | -4.981 | -4.007 | -4.341 | -4.929 | -3.449 | -4.958 | -4.931 | -4.981 | -4.981 | 104360 | ISL2     | NM_027397_9_+1  |
| Lman1         | 5.433  | 5.687  | 4.530  | 4.714  | 3.928  | 4.270  | 4.696  | 5.426  | 5.545  | 6.016  | 70361  | LMAN1    | NM_027400_18_-1 |
| Fndc5         | -0.883 | -1.569 | 5.648  | 5.989  | 2.668  | 4.580  | -0.199 | 0.525  | -2.871 | -3.510 | 384061 | FNDC5    | NM_027402_4_+1  |
| Bag5          | 5.611  | 5.303  | 5.239  | 5.002  | 5.021  | 4.628  | 5.106  | 5.091  | 5.247  | 5.075  | 70369  | BAG5     | NM_027404_12_-1 |
| Gpatch2l      | 3.482  | 3.382  | 4.481  | 4.402  | 4.974  | 4.846  | 4.869  | 4.466  | 5.229  | 5.148  | 70373  | GPATCH2L | NM_027405_12_+1 |
| Aldh1l1       | -0.387 | 0.020  | -2.042 | -1.741 | -2.377 | -1.952 | -1.829 | -0.876 | -0.764 | -1.514 | 107747 | ALDH1L1  | NM_027406_6_+1  |
| Ica1l         | -1.445 | -2.275 | -0.155 | 0.967  | -3.350 | -1.976 | -2.128 | -1.362 | -0.894 | -0.299 | 70375  | ICA1L    | NM_027407_1_-1  |
| Mospd1        | -0.082 | 1.471  | 1.686  | -0.158 | -0.027 | -0.451 | -0.817 | -0.154 | 0.098  | 0.896  | 70380  | MOSPD1   | NM_027409_X_-1  |
| Tecpr1        | 3.699  | 3.760  | 2.937  | 3.028  | 3.162  | 3.205  | 3.443  | 3.582  | 3.685  | 3.591  | 70381  | TECPR1   | NM_027410_5_-1  |
| Spdl1         | -0.167 | -0.423 | 2.350  | 2.448  | 2.842  | 2.239  | 1.737  | 1.767  | 0.069  | -0.894 | 70385  | SPDL1    | NM_027411_11_-1 |
| Ttc9c         | 4.668  | 4.615  | 6.332  | 6.266  | 5.674  | 5.722  | 5.355  | 5.314  | 5.011  | 5.123  | 70387  | TTC9C    | NM_027412_19_-1 |
| Lrrc28        | 1.780  | 2.045  | 0.887  | 0.034  | 0.951  | 0.635  | 1.134  | 0.057  | 0.564  | 0.590  | 67867  | LRRC28   | NM_027413_7_-1  |

|               |        |        |        |        |        |        |        |        |        |        |        |                     |                 |
|---------------|--------|--------|--------|--------|--------|--------|--------|--------|--------|--------|--------|---------------------|-----------------|
| Tmem70        | 5.910  | 6.053  | 6.383  | 6.457  | 5.378  | 5.763  | 5.349  | 5.471  | 4.632  | 4.852  | 70397  | TMEM70              | NM_027415_1_+1  |
| Calml3        | -1.428 | -0.146 | -4.981 | -4.981 | -4.968 | -4.968 | -4.981 | -4.981 | -4.981 | -4.981 | 70405  | CALML3              | NM_027416_13_-1 |
| Mapk6         | 2.140  | 1.473  | 2.240  | -0.241 | 3.007  | 0.399  | 2.257  | 1.907  | 1.959  | 2.634  | 50772  | MAPK6               | NM_027418_9_-1  |
| 2810408A11Rik | -0.760 | -1.457 | 0.232  | 0.286  | 1.447  | 1.425  | 0.527  | -1.003 | -1.236 | -1.481 | 70419  | NA                  | NM_027419_11_-1 |
| Arpin         | -2.604 | -2.895 | 6.127  | 6.669  | 3.537  | 3.159  | 2.812  | 1.392  | -1.506 | -0.683 | 70420  | ARPIN C15orf38-AINM | NM_027420_7_-1  |
| Ints2         | 2.520  | 2.333  | 3.314  | 3.337  | 3.023  | 3.411  | 2.700  | 3.177  | 2.496  | 2.658  | 70422  | INTS2               | NM_027421_11_-1 |
| Mier2         | 3.129  | 3.318  | 4.261  | 4.406  | 4.001  | 3.821  | 3.772  | 4.083  | 3.620  | 3.664  | 70427  | MIER2               | NM_027422_10_-1 |
| Polr3b        | 4.397  | 4.555  | 4.049  | 3.789  | 4.190  | 4.147  | 4.185  | 4.367  | 4.718  | 4.834  | 70428  | POLR3B              | NM_027423_10_+1 |
| Rufy2         | 4.693  | 4.426  | 4.888  | 4.533  | 5.070  | 5.043  | 4.629  | 4.456  | 4.298  | 4.353  | 70432  | RUFY2               | NM_027425_10_+1 |
| Draxin        | -1.626 | -4.981 | -2.881 | -4.363 | -3.196 | -4.163 | -3.016 | -4.968 | -1.177 | -4.981 | 70433  | DRAXIN              | NM_027426_4_-1  |
| Taf15         | 2.226  | 2.067  | 3.053  | 2.257  | 2.833  | 2.806  | 2.287  | 1.239  | 0.622  | 0.941  | 70439  | TAF15               | NM_027427_11_+1 |
| Mpc2          | 7.151  | 7.020  | 7.515  | 7.597  | 6.866  | 6.988  | 7.167  | 6.887  | 6.295  | 6.271  | 70456  | MPC2                | NM_027430_1_+1  |
| Wdr77         | 5.411  | 5.535  | 5.730  | 5.728  | 5.576  | 5.462  | 5.272  | 5.366  | 4.584  | 4.849  | 70465  | WDR77               | NM_027432_3_+1  |
| Rprd1b        | 2.589  | 3.106  | 3.820  | 3.808  | 3.827  | 3.410  | 3.518  | 3.581  | 4.033  | 3.720  | 70470  | RPRD1B              | NM_027434_2_+1  |
| Atad2         | 2.689  | 3.275  | 4.812  | 5.077  | 5.393  | 5.300  | 4.889  | 5.072  | 3.995  | 4.892  | 70472  | ATAD2               | NM_027435_15_-1 |
| Mipep         | 3.788  | 4.113  | 4.194  | 4.236  | 3.734  | 3.921  | 3.233  | 3.839  | 3.357  | 3.715  | 70478  | MPEP                | NM_027436_14_+1 |
| Pnma1         | 1.189  | 1.586  | -1.164 | -1.648 | -0.308 | -0.899 | -1.677 | -3.173 | -1.639 | -2.557 | 70481  | PNMA1               | NM_027438_12_-1 |
| Atp6ap2       | 8.761  | 8.749  | 7.994  | 7.988  | 7.529  | 7.717  | 7.717  | 7.730  | 7.459  | 7.791  | 70495  | ATP6AP2             | NM_027439_X_+1  |
| Bbx           | 5.416  | 5.390  | 5.815  | 5.221  | 5.736  | 5.642  | 5.428  | 5.125  | 5.028  | 5.134  | 70508  | BBX                 | NM_027444_16_-1 |
| Rnf167        | 7.450  | 7.533  | 7.099  | 7.141  | 7.285  | 7.442  | 6.654  | 6.773  | 6.336  | 6.196  | 70510  | RNF167              | NM_027445_11_+1 |
| Eef2kmt       | 5.674  | 5.492  | 5.015  | 5.082  | 4.254  | 4.512  | 4.525  | 4.710  | 4.431  | 4.057  | 70511  | EEF2KMT             | NM_027446_16_-1 |
| Lca5          | 3.354  | 2.949  | -1.398 | -1.784 | 0.341  | 0.959  | -1.213 | 0.057  | -0.274 | 0.782  | 75782  | LCA5                | NM_027448_9_-1  |
| Glipr2        | 4.913  | 4.312  | 6.169  | 6.953  | 2.798  | 4.160  | 5.170  | 5.940  | 8.135  | 7.999  | 384009 | GLIPR2              | NM_027450_4_+1  |
| Btf3l4        | 6.413  | 6.378  | 6.059  | 5.845  | 6.120  | 5.824  | 6.008  | 5.722  | 5.706  | 5.293  | 70533  | BTF3L4              | NM_027453_4_-1  |
| Qpct          | -4.981 | -4.981 | 4.417  | 0.339  | 0.091  | -1.629 | 2.451  | 2.330  | 4.109  | 3.529  | 70536  | QPCT                | NM_027455_17_+1 |
| Armc9         | 2.142  | 1.936  | 1.550  | 0.822  | 2.633  | 2.051  | 1.468  | 1.547  | 1.324  | 1.094  | 78795  | ARMC9               | NM_027456_1_+1  |
| Tmem242       | 5.945  | 6.260  | 4.284  | 5.713  | 4.388  | 5.385  | 4.318  | 5.565  | 3.909  | 4.753  | 70544  | TMEM242             | NM_027457_17_-1 |
| Slc25a33      | 3.864  | 3.817  | 0.990  | 2.233  | 2.381  | 2.564  | 2.865  | 3.002  | 2.091  | 2.279  | 70556  | SLC25A33            | NM_027460_4_-1  |
| Wars2         | 4.586  | 4.369  | 3.096  | 2.394  | 2.611  | 2.952  | 2.602  | 2.551  | 2.829  | 2.587  | 70560  | WARS2               | NM_027462_3_+1  |
| Fam213a       | 2.442  | 2.146  | 2.220  | 3.355  | 1.739  | 3.450  | 1.159  | 3.543  | -0.004 | 1.362  | 70564  | FAM213A             | NM_027464_14_-1 |
| Cpm           | -1.001 | -3.408 | -2.742 | -0.810 | -1.756 | 0.080  | 0.102  | 1.603  | -1.773 | -0.770 | 70574  | CPM                 | NM_027468_10_+1 |
| Gfod2         | 0.378  | 1.576  | 0.654  | 0.512  | -1.123 | -1.067 | -1.639 | -0.415 | -3.531 | -2.988 | 70575  | GFOD2               | NM_027469_8_-1  |
| Pak4          | 3.212  | 3.264  | 4.126  | 3.773  | 3.347  | 3.388  | 3.928  | 4.070  | 4.752  | 4.541  | 70584  | PAK4                | NM_027470_7_-1  |
| 5730455P16Rik | 3.957  | 3.807  | 4.285  | 4.140  | 4.260  | 4.127  | 3.988  | 3.974  | 3.943  | 4.252  | 70591  | C17orf75            | NM_027472_11_-1 |
| Ecd           | 6.371  | 6.528  | 5.817  | 6.131  | 5.634  | 6.008  | 5.277  | 5.731  | 5.429  | 5.664  | 70601  | ECD                 | NM_027475_14_-1 |
| Zdhc24        | 1.945  | 3.044  | 1.973  | 2.966  | 2.081  | 3.246  | 1.965  | 2.813  | 1.958  | 3.251  | 70605  | ZDHHC24             | NM_027476_19_+1 |
| Zfp398        | 3.885  | 3.526  | 4.454  | 4.727  | 3.656  | 3.780  | 3.242  | 3.449  | 3.031  | 3.205  | 272347 | ZNF398              | NM_027477_6_+1  |
| Tmem230       | 6.705  | 6.802  | 5.638  | 6.187  | 5.747  | 6.165  | 5.566  | 5.926  | 4.902  | 5.553  | 70612  | TMEM230             | NM_027478_2_-1  |
| Ankrd24       | 1.227  | 1.915  | -0.118 | 0.884  | 0.200  | 0.741  | 0.656  | 0.717  | -0.458 | -0.048 | 70615  | ANKRD24             | NM_027480_10_+1 |
| Supp1         | 5.441  | 5.411  | 5.112  | 5.225  | 5.309  | 5.276  | 5.245  | 5.075  | 5.122  | 4.763  | 70616  | SUGP1               | NM_027481_8_+1  |
| 5730508B09Rik | 5.995  | 6.377  | 5.441  | 5.457  | 4.138  | 4.639  | 4.523  | 4.978  | 5.291  | 5.339  | 70617  | C4orf32             | NM_027482_3_-1  |
| Med26         | 3.112  | 2.925  | 3.069  | 3.025  | 3.306  | 3.012  | 3.099  | 2.967  | 3.796  | 3.693  | 70625  | MED26               | NM_027485_8_-1  |
| Ccdc53        | 0.483  | 0.711  | 0.534  | -0.114 | -0.679 | -1.248 | -1.406 | -0.742 | -0.984 | -1.808 | 67282  | CCDC53              | NM_027487_10_+1 |
| Dcp2          | 4.356  | 4.041  | 5.107  | 4.805  | 4.882  | 4.715  | 4.745  | 4.159  | 3.739  | 3.541  | 70640  | DCP2                | NM_027490_18_+1 |
| Rragd         | -2.413 | 0.910  | 1.505  | 1.924  | 0.676  | 0.933  | -2.300 | -0.274 | -1.591 | -0.497 | 52187  | RRAGD               | NM_027491_4_+1  |
| Actr8         | 5.481  | 5.523  | 5.095  | 5.058  | 5.214  | 5.239  | 4.970  | 5.182  | 5.398  | 5.190  | 56249  | ACTR8               | NM_027493_14_+1 |
| Zcchc8        | 4.634  | 4.615  | 4.969  | 4.740  | 5.271  | 5.110  | 5.366  | 5.092  | 5.530  | 5.527  | 70650  | ZCCHC8              | NM_027494_5_-1  |
| Tmem144       | 1.088  | 0.818  | -0.372 | 0.114  | -1.128 | -1.288 | -0.146 | -0.734 | -1.540 | -1.372 | 70652  | TMEM144             | NM_027495_3_-1  |
| Ankrd33b      | -1.792 | -4.981 | -3.109 | -4.874 | -3.049 | -4.961 | -4.545 | -4.825 | -3.560 | -3.054 | 67434  | ANKRD33B            | NM_027496_15_-1 |
| Epc1          | 3.387  | 3.166  | 3.640  | 3.359  | 3.795  | 3.712  | 3.375  | 3.174  | 3.827  | 3.829  | 13831  | EPC1                | NM_027497_18_-1 |
| Slk3          | 3.531  | 3.396  | 3.194  | 3.324  | 3.492  | 3.257  | 3.263  | 3.274  | 4.678  | 4.614  | 70661  | SIK3                | NM_027498_9_+1  |
| 4933434E20Rik | 1.419  | 0.694  | 1.064  | 1.141  | 2.557  | 2.178  | 1.204  | 2.082  | 1.979  | 1.786  | 99650  | C1orf43             | NM_027500_3_+1  |
| Prdm16        | -4.488 | -4.981 | -4.265 | -4.624 | -3.221 | -0.369 | -3.523 | -3.342 | -2.685 | -4.953 | 70673  | PRDM16              | NM_027504_4_-1  |
| 3830403N18Rik | 0.701  | 2.160  | 2.414  | 1.025  | 1.394  | 0.892  | 1.795  | 1.417  | 0.568  | 0.949  | 70691  | NA                  | NM_027510_X_+1  |
| Nup205        | 3.391  | 3.560  | 4.119  | 4.291  | 4.462  | 4.222  | 4.168  | 4.359  | 4.186  | 4.251  | 70699  | NUP205              | NM_027513_6_+1  |
| Pvr           | 3.475  | 4.028  | 3.698  | 5.272  | 1.532  | 2.462  | 2.940  | 3.831  | 2.742  | 4.277  | 52118  | NA                  | NM_027514_7_-1  |
| Gpr137c       | -2.336 | -1.518 | -1.780 | -2.343 | -1.505 | -2.275 | -1.866 | -2.898 | -1.537 | -1.930 | 70713  | GPR137C             | NM_027518_14_+1 |
| Medag         | -4.981 | -4.981 | -3.811 | -4.972 | -2.315 | -4.454 | -4.804 | -4.333 | -3.618 | -4.209 | 70717  | MEDAG               | NM_027519_5_+1  |
| Hmha1         | -4.793 | -4.627 | -4.741 | -3.641 | -3.528 | -2.879 | -2.408 | -4.638 | 1.361  | -1.811 | 70719  | ARHGAP45            | NM_027521_10_+1 |
| Rasgef1a      | -2.686 | -4.981 | -2.103 | -0.788 | -1.496 | -1.912 | -4.835 | -2.605 | -2.333 | -2.152 | 70727  | RASGEF1A            | NM_027526_6_+1  |
| Nos1ap        | -0.543 | -0.866 | -3.496 | -3.516 | -2.408 | -2.441 | -1.559 | -3.460 | -0.911 | -2.257 | 70729  | NA                  | NM_027528_1_-1  |
| 6330409D20Rik | -3.099 | -4.981 | -2.600 | -3.837 | -2.712 | -4.578 | -4.038 | -4.411 | -3.196 | -3.527 | 70730  | NA                  | NM_027529_2_-1  |
| Rufy3         | -4.254 | -4.543 | -4.105 | -3.369 | -3.334 | -3.703 | -3.372 | -4.062 | -1.376 | -2.604 | 52822  | RUFY3               | NM_027530_5_+1  |
| Anapc15       | 4.027  | 3.994  | 4.405  | 4.753  | 3.299  | 3.261  | 3.115  | 2.981  | 2.410  | 2.396  | 75430  | NA                  | NM_027532_7_+1  |
| Tspan2        | 3.803  | 0.985  | 3.249  | 3.216  | 5.154  | 4.944  | 3.930  | 3.314  | 1.789  | 1.983  | 70747  | TSPAN2              | NM_027533_3_+1  |
| Kdsr          | 4.980  | 5.351  | 4.052  | 4.078  | 3.918  | 4.188  | 4.127  | 4.355  | 4.483  | 4.517  | 70750  | KDSR                | NM_027534_1_-1  |
| Dclk2         | -1.459 | -2.361 | 0.677  | 0.386  | -3.677 | -1.519 | -2.499 | -2.918 | -4.950 | -3.718 | 70762  | DCLK2               | NM_027539_3_-1  |
| Prpf3         | 4.061  | 4.344  | 4.468  | 4.495  | 4.697  | 4.563  | 4.447  | 4.324  | 4.130  | 4.036  | 70767  | PRPF3               | NM_027541_3_-1  |
| Ggnbp1        | -1.129 | -1.711 | -3.445 | -4.115 | -1.423 | -0.908 | -2.172 | -1.994 | -4.981 | -4.981 | 70772  | NA                  | NM_027544_17_+1 |
| Cwf19l2       | 4.860  | 4.912  | 4.575  | 4.580  | 4.809  | 4.962  | 4.915  | 4.608  | 4.091  | 4.605  | 244672 | CWF19L2             | NM_027545_9_+1  |
| Prdm5         | -0.597 | -1.488 | -2.554 | -0.739 | -3.367 | -3.591 | -4.496 | -3.643 | -2.064 | -3.449 | 70779  | PRDM5               | NM_027547_6_+1  |
| Serpinb7      | -1.442 | -4.981 | -0.132 | -0.255 | 3.068  | 3.348  | 1.341  | 0.719  | -4.190 | -0.884 | 116872 | SERPINB7            | NM_027548_1_+1  |
| Klhl30        | -0.672 | 0.787  | -4.981 | -4.981 | -4.978 | -4.411 | -4.923 | -4.388 | -4.981 | -4.981 | 70788  | KLHL30              | NM_027551_1_+1  |
| Kynu          | 6.444  | 6.711  | 5.604  | 5.625  | 6.370  | 6.178  | 5.749  | 4.827  | 2.585  | 2.319  | 70789  | KYNU                | NM_027552_2_+1  |

|               |        |        |        |        |        |        |        |        |        |        |           |               |                 |
|---------------|--------|--------|--------|--------|--------|--------|--------|--------|--------|--------|-----------|---------------|-----------------|
| Usp38         | 4.490  | 4.008  | 4.885  | 4.411  | 4.678  | 4.336  | 4.573  | 4.269  | 5.159  | 4.899  | 74841     | USP38         | NM_027554_8_-1  |
| Cep192        | 4.703  | 4.772  | 4.656  | 4.562  | 4.337  | 4.133  | 4.133  | 4.041  | 4.305  | 4.234  | 70799     | CEP192        | NM_027556_18_+1 |
| Pwwp2a        | 3.699  | 3.931  | 3.292  | 3.451  | 3.226  | 3.540  | 2.974  | 3.020  | 2.539  | 3.263  | 70802     | PWWP2A        | NM_027557_11_+1 |
| Pgrmc2        | 4.570  | 4.665  | 4.226  | 4.182  | 3.988  | 3.911  | 4.032  | 4.243  | 4.268  | 4.263  | 70804     | PGRMC2        | NM_027558_3_-1  |
| Cfap43        | -1.294 | -0.228 | 0.148  | -0.001 | -0.001 | -1.765 | 0.208  | -2.199 | -1.173 | -0.522 | 100048534 | CFAP43        | NM_027559_19_-1 |
| Arrdc2        | 4.338  | 4.397  | 4.803  | 4.526  | 5.573  | 5.512  | 5.732  | 5.474  | 4.961  | 4.989  | 70807     | ARRDC2        | NM_027560_8_-1  |
| Clec2g        | -4.981 | -4.160 | -4.676 | -4.880 | -3.702 | -2.786 | -3.440 | -2.057 | -4.942 | -1.686 | 70809     | NA            | NM_027562_6_+1  |
| 4921507P07Rik | -4.981 | -4.981 | -2.235 | -0.644 | -3.612 | -3.026 | -1.320 | -1.544 | -1.093 | -2.446 | 70821     | C7orf31       | NM_027564_6_-1  |
| Spag9         | 5.694  | 4.923  | 6.509  | 5.994  | 6.198  | 6.027  | 5.807  | 5.332  | 5.107  | 4.976  | 70834     | SPAG9         | NM_027569_11_+1 |
| Ldhd          | -1.978 | -3.267 | -0.361 | 0.255  | -4.039 | -2.104 | -3.796 | -1.823 | -3.109 | -3.498 | 52815     | LDHD          | NM_027570_8_-1  |
| P2ry12        | 5.648  | 5.782  | 2.061  | 1.846  | 1.134  | 0.815  | 2.917  | 3.598  | 3.204  | 3.753  | 70839     | P2RY12        | NM_027571_3_-1  |
| Krt28         | -4.981 | -1.620 | -4.981 | -4.981 | -3.729 | -3.184 | -4.237 | -4.975 | -4.981 | -4.981 | 70843     | KRT28         | NM_027574_11_-1 |
| Cd200r3       | -4.981 | -4.981 | -3.165 | -4.556 | -1.785 | -4.962 | 0.651  | -3.802 | -4.981 | -4.981 | 74603     | NA            | NM_027578_16_+1 |
| Lrrc63        | -2.090 | 0.127  | -0.860 | 0.290  | -0.057 | 0.256  | -0.172 | -0.417 | -1.501 | -0.027 | 70859     | LRRC63        | NM_027581_14_-1 |
| Cnbd2         | 1.507  | 2.600  | 1.806  | 1.029  | 1.973  | 1.504  | 2.597  | 1.083  | 2.316  | 1.354  | 70873     | CNBD2         | NM_027585_2_+1  |
| Micalcl       | -4.981 | -4.981 | -1.525 | -0.609 | -1.976 | -1.866 | -1.819 | -4.098 | -2.396 | -1.614 | 100504195 | MICALCL       | NM_027587_7_+1  |
| Ints10        | 3.621  | 4.688  | 4.218  | 4.728  | 4.410  | 4.933  | 4.039  | 4.836  | 4.185  | 4.726  | 70885     | INTS10        | NM_027590_8_+1  |
| Ak6           | 5.326  | 5.234  | 4.911  | 4.988  | 4.185  | 4.160  | 4.884  | 4.627  | 3.819  | 4.026  | 102216272 | AK6           | NM_027592_13_+1 |
| Nsun7         | -4.981 | -4.981 | -2.645 | -4.262 | -4.885 | -4.949 | -4.883 | -4.978 | -4.981 | -4.981 | 70918     | NSUN7         | NM_027602_5_+1  |
| Usp15         | 5.863  | 5.662  | 5.855  | 5.745  | 5.264  | 5.345  | 5.585  | 5.602  | 5.874  | 6.076  | 14479     | USP15         | NM_027604_10_-1 |
| Mmrn1         | -4.981 | -1.973 | -4.051 | -2.157 | -2.676 | -3.133 | -4.447 | -3.822 | -0.485 | -0.899 | 70945     | MMRN1         | NM_027613_6_+1  |
| Wdr20rt       | -4.981 | -4.981 | -4.981 | -4.981 | -4.285 | -4.576 | -3.969 | -4.487 | -3.574 | -3.221 | 70948     | NA            | NM_027614_12_+1 |
| Spata1        | 2.173  | 2.423  | 0.825  | 1.019  | 0.777  | 0.896  | -0.181 | 0.822  | 0.450  | 1.295  | 70951     | SPATA1        | NM_027617_3_-1  |
| Ttc14         | 5.407  | 5.622  | 2.833  | 4.019  | 2.932  | 3.468  | 2.690  | 2.510  | 3.154  | 3.495  | 67120     | TTC14         | NM_027619_3_+1  |
| Psd3          | -4.981 | -4.981 | -3.438 | -4.550 | -3.656 | -4.219 | -4.885 | -4.912 | -3.955 | -4.981 | 234353    | PSD3          | NM_027626_8_-1  |
| Eva1c         | -4.981 | -2.239 | -3.592 | -3.290 | -4.975 | -4.942 | -4.908 | -3.909 | -4.981 | -4.981 | 70967     | EVA1C         | NM_027627_16_+1 |
| Pgm2l1        | 2.490  | 2.549  | 2.247  | 1.627  | 1.381  | 1.415  | 2.135  | 1.787  | 2.353  | 3.165  | 70974     | PGM2L1        | NM_027629_7_+1  |
| Fancd2os      | -0.644 | -0.823 | -3.173 | -3.141 | -2.971 | -3.100 | -2.041 | -3.351 | -3.531 | -4.316 | 70979     | FANCD2OS      | NM_027633_6_-1  |
| Spef1         | -0.745 | 0.289  | -1.162 | -0.581 | -2.965 | -3.060 | -0.522 | -0.740 | 0.798  | 0.746  | 70997     | SPEF1         | NM_027641_2_-1  |
| Phf6          | 5.036  | 5.203  | 4.901  | 4.894  | 5.188  | 5.226  | 4.958  | 4.700  | 3.971  | 4.235  | 70998     | PHF6          | NM_027642_X_+1  |
| Naa40         | 4.287  | 3.955  | 4.783  | 4.979  | 5.246  | 5.000  | 5.245  | 5.025  | 5.347  | 4.974  | 70999     | NAA40         | NM_027643_19_-1 |
| Prss41        | -4.981 | -2.997 | -4.966 | -3.917 | -4.501 | -4.386 | -4.970 | -4.734 | -4.981 | -3.510 | 71003     | PRSS41        | NM_027644_17_-1 |
| Spats1        | -2.647 | -4.981 | -2.020 | -0.758 | -1.747 | -0.852 | -3.486 | -3.803 | -4.190 | -4.981 | 71020     | SPATS1        | NM_027649_17_-1 |
| Tmem30c       | -1.194 | -0.830 | -4.495 | -4.958 | -4.981 | -4.981 | -4.981 | -4.981 | -4.981 | -4.981 | 71027     | NA            | NM_027651_16_-1 |
| Ept1          | 2.719  | 2.043  | 4.190  | 4.045  | 2.728  | 2.991  | 3.002  | 3.605  | 3.431  | 3.746  | 28042     | SELENOI       | NM_027652_5_+1  |
| Pcgf6         | 3.448  | 3.892  | 3.407  | 3.398  | 3.329  | 3.616  | 2.769  | 3.204  | 1.115  | 1.162  | 71041     | PCGF6         | NM_027654_19_-1 |
| Zbtb46        | -4.981 | -4.981 | 3.374  | 3.076  | 2.964  | 2.636  | 2.066  | 0.916  | -1.636 | -0.408 | 72147     | ZBTB46        | NM_027656_2_-1  |
| Hexim2        | 0.374  | -0.106 | -1.811 | -0.270 | -1.976 | 0.367  | 0.260  | 0.076  | -1.655 | 0.198  | 71059     | HEXIM2        | NM_027658_11_+1 |
| Adam30        | -2.948 | -1.941 | -4.981 | -4.981 | -3.952 | -2.899 | -4.984 | -4.509 | -1.293 | -4.981 | 71078     | ADAM30        | NM_027665_3_+1  |
| Arhgap19      | 1.694  | -2.230 | 2.148  | 2.930  | 3.201  | 2.640  | 3.259  | 3.366  | 3.337  | 3.188  | 71085     | ARHGAP19      | NM_027667_19_-1 |
| Tssk4         | -3.735 | -4.981 | -2.796 | -3.163 | -2.477 | -3.003 | -4.186 | -4.259 | -3.108 | -4.451 | 71099     | TSSK4         | NM_027673_14_+1 |
| Gpr39         | -4.981 | -4.981 | -4.960 | -4.757 | -4.916 | 0.057  | -3.747 | -2.557 | -4.981 | -4.981 | 71111     | GPR39         | NM_027677_1_+1  |
| Zranb3        | -0.505 | -3.260 | 0.301  | 1.355  | 1.811  | -0.531 | 0.247  | 0.753  | -1.128 | -4.254 | 226409    | ZRANB3        | NM_027678_1_-1  |
| Cabyr         | 0.445  | -4.981 | -1.500 | -2.890 | -1.891 | -2.068 | -1.009 | -1.691 | -0.642 | -1.331 | 71132     | CABYR         | NM_027687_18_+1 |
| Rfx4          | -3.189 | -2.681 | -4.070 | -4.928 | -4.779 | -4.429 | -4.772 | -4.975 | -3.750 | -4.981 | 71137     | RFX4          | NM_027689_10_+1 |
| Golga7b       | -4.981 | -4.981 | -4.494 | -4.688 | -1.213 | -3.352 | -3.277 | -5.003 | -4.981 | -4.512 | 71146     | GOLGA7B       | NM_027694_19_+1 |
| Oxsm          | 2.530  | 2.720  | 2.711  | 2.337  | 2.575  | 2.128  | 2.731  | 2.273  | 2.596  | 2.571  | 71147     | OXSM          | NM_027695_14_-1 |
| Mier1         | 1.987  | 2.743  | 2.084  | 2.623  | 2.768  | 2.559  | 2.031  | 2.258  | 2.567  | 2.629  | 71148     | MIER1         | NM_027696_4_+1  |
| 4933413G19Rik | -3.189 | -0.143 | -4.981 | -4.981 | -4.981 | -4.981 | -4.903 | -4.186 | -4.981 | -4.981 | 71149     | LICR101929469 | NM_027697_6_+1  |
| Er12          | 1.533  | 2.264  | 1.675  | 1.477  | 2.096  | 2.025  | 2.122  | 2.335  | 1.804  | 1.744  | 71151     | ER12          | NM_027698_7_-1  |
| Lrrc72        | -1.298 | -1.053 | -3.218 | -4.766 | -3.574 | -3.856 | -3.687 | -4.852 | -2.736 | -3.449 | 71156     | LRRC72        | NM_027699_12_-1 |
| Zfp626        | 2.953  | 2.414  | 2.979  | 1.997  | 2.805  | 2.795  | 2.442  | 1.816  | 1.969  | 1.989  | 71163     | NA            | NM_027703_7_+1  |
| Nbas          | 3.349  | 3.528  | 3.335  | 3.300  | 3.160  | 3.381  | 2.859  | 3.416  | 3.599  | 3.906  | 71169     | NBAS          | NM_027706_12_+1 |
| Nipbl         | 6.001  | 5.692  | 5.489  | 5.117  | 5.916  | 6.070  | 5.781  | 5.808  | 5.729  | 5.504  | 71175     | NIPBL         | NM_027707_15_-1 |
| Fbxo24        | -4.981 | -4.981 | -3.095 | -3.757 | -2.036 | -2.393 | -3.024 | -4.136 | -1.234 | -2.243 | 71176     | FBXO24        | NM_027708_5_-1  |
| Clec12b       | -4.981 | -1.570 | -1.688 | -3.707 | -3.940 | -4.794 | -2.376 | -4.808 | -4.981 | -1.846 | 71183     | CLEC12B       | NM_027709_6_-1  |
| Iqgap2        | 6.728  | 6.744  | 6.373  | 6.011  | 4.203  | 3.785  | 5.273  | 5.601  | 7.313  | 6.813  | 544963    | IQGAP2        | NM_027711_13_-1 |
| Dlgap1        | -4.981 | -4.981 | -4.981 | -4.981 | -4.961 | -4.961 | -4.981 | -4.981 | -4.981 | -4.981 | 224997    | DLGAP1        | NM_027712_17_+1 |
| Otud1         | 4.373  | 4.286  | 2.859  | 2.708  | 2.308  | 2.331  | 2.590  | 2.963  | 3.215  | 3.116  | 71198     | OTUD1         | NM_027715_2_+1  |
| Nudt4         | 3.437  | 3.780  | 4.623  | 4.642  | 4.381  | 4.528  | 4.698  | 5.190  | 6.057  | 6.092  | 71207     | NUDT4         | NM_027722_10_-1 |
| Cage1         | -0.334 | 0.563  | -1.599 | -1.017 | -0.899 | -1.693 | -0.808 | -0.462 | -0.719 | -1.099 | 71213     | CAGE1         | NM_027724_13_-1 |
| Dlg5          | -4.981 | -4.981 | -4.029 | -3.489 | -4.962 | -4.758 | -4.943 | -4.007 | -4.981 | -4.981 | 71228     | DLG5          | NM_027726_14_-1 |
| Dym           | 4.538  | 4.517  | 5.828  | 5.545  | 5.930  | 6.220  | 5.448  | 5.454  | 4.931  | 4.918  | 69190     | DYM           | NM_027727_18_+1 |
| Enkur         | 0.342  | 0.815  | -2.610 | -1.965 | -1.791 | -1.272 | -1.790 | -0.602 | 0.642  | 0.302  | 71233     | ENKUR         | NM_027728_2_-1  |
| Rsph14        | -4.981 | -4.981 | -4.981 | -4.981 | -4.981 | -4.981 | -4.981 | -4.981 | -4.726 | -4.981 | 71236     | RSPH14        | NM_027730_10_-1 |
| Spata24       | 1.747  | 1.873  | 0.146  | -0.754 | 0.443  | 0.159  | 0.170  | -0.529 | -1.857 | -2.458 | 71242     | SPATA24       | NM_027733_18_-1 |
| B4galnt1      | 6.421  | 6.666  | 6.632  | 7.405  | 8.396  | 8.408  | 8.251  | 8.323  | 8.373  | 8.944  | 14421     | B4GALNT1      | NM_027739_10_+1 |
| Poc1b         | 2.516  | 2.374  | 2.794  | 2.818  | 3.184  | 2.976  | 3.376  | 3.149  | 3.952  | 3.866  | 382406    | POC1B         | NM_027740_10_+1 |
| Lrrfp12       | 3.972  | 4.328  | 5.023  | 4.990  | 5.066  | 4.768  | 5.378  | 5.261  | 6.038  | 5.725  | 71268     | NA            | NM_027742_9_+1  |
| Noxred1       | 2.648  | 2.812  | 2.003  | 2.632  | 2.264  | 2.817  | 0.666  | 1.155  | -1.258 | -0.450 | 71275     | NOXRED1       | NM_027744_12_-1 |
| Ccdc57        | -1.017 | 0.062  | -1.606 | -2.201 | -0.677 | -0.975 | -1.331 | -0.974 | 0.334  | 0.145  | 71276     | CCDC57        | NM_027745_11_-1 |
| Taf3          | 4.810  | 5.076  | 4.849  | 4.857  | 5.228  | 5.111  | 5.063  | 4.899  | 5.049  | 4.699  | 209361    | TAF3          | NM_027748_2_-1  |
| Mfap3l        | -4.608 | -0.655 | -4.874 | -4.740 | -4.971 | -4.971 | -4.788 | -2.787 | -0.121 | 1.341  | 71306     | MFAP3L        | NM_027756_8_+1  |
| Tbc1d9        | -0.832 | -2.583 | 1.385  | -1.335 | 1.435  | -1.887 | 3.512  | 0.914  | 1.067  | 0.207  | 71310     | TBC1D9        | NM_027758_8_+1  |

|               |        |        |        |        |        |        |        |        |        |        |        |          |                 |
|---------------|--------|--------|--------|--------|--------|--------|--------|--------|--------|--------|--------|----------|-----------------|
| Fsip1         | 1.238  | -0.153 | 1.217  | -3.918 | -0.666 | -4.160 | -1.360 | -4.011 | -2.315 | -4.981 | 71313  | FSIP1    | NM_027759_2_-1  |
| Rassf8        | -1.277 | 0.131  | -2.133 | -1.079 | -3.861 | -4.714 | -0.960 | -1.753 | 0.746  | -0.723 | 71323  | RASSF8   | NM_027760_6_+1  |
| Trem11        | -3.927 | -3.647 | -4.978 | -4.680 | -4.590 | -4.934 | -4.516 | -4.955 | -4.823 | -2.450 | 71326  | TREML1   | NM_027763_17_+1 |
| Rcbtb1        | 4.059  | 4.099  | 4.879  | 4.766  | 4.842  | 4.939  | 4.432  | 4.634  | 4.668  | 4.737  | 71330  | RCBTB1   | NM_027764_14_+1 |
| Cpne3         | 6.407  | 5.960  | 7.480  | 7.255  | 5.708  | 5.449  | 6.047  | 5.985  | 6.487  | 6.759  | 70568  | CPNE3    | NM_027769_4_-1  |
| Pdss2         | 1.805  | 1.709  | 2.011  | 2.056  | 2.160  | 2.199  | 1.424  | 1.909  | 1.419  | 1.897  | 71365  | PDSS2    | NM_027772_10_+1 |
| Fam57a        | -1.098 | -0.765 | -0.040 | 0.275  | -0.041 | -0.815 | -0.159 | -1.280 | -1.640 | -0.459 | 116972 | FAM57A   | NM_027773_11_+1 |
| Pex1          | -4.614 | -4.374 | -4.933 | -4.942 | -4.776 | -3.311 | -4.599 | -4.886 | -1.118 | -4.612 | 71382  | PEX1     | NM_027777_5_+1  |
| Kctd6         | 1.771  | 1.016  | 1.924  | 2.040  | 0.458  | 1.357  | 0.991  | 1.004  | 2.277  | 1.927  | 71393  | KCTD6    | NM_027782_14_+1 |
| Rfx2          | -3.456 | -2.776 | -4.391 | -4.374 | -4.371 | -4.769 | -3.437 | -1.838 | 0.749  | 0.244  | 19725  | RFX2     | NM_027787_17_-1 |
| Dhrs2         | -3.189 | -4.981 | -3.670 | -4.976 | -4.473 | -3.336 | -4.940 | -4.913 | -4.981 | -4.981 | 71412  | NA       | NM_027790_14_+1 |
| Tmem80        | 1.796  | 1.496  | 1.321  | -0.006 | 0.249  | 0.059  | -0.073 | -0.008 | 1.174  | 0.146  | 71448  | TMEM80   | NM_027797_7_+1  |
| Ankrd40       | 5.190  | 5.101  | 5.109  | 5.108  | 5.144  | 5.134  | 5.063  | 4.944  | 5.458  | 5.439  | 71452  | ANKRD40  | NM_027799_11_+1 |
| Ccdc191       | 4.351  | 3.882  | 3.184  | 3.180  | 3.822  | 4.096  | 3.570  | 3.224  | 2.137  | 2.273  | 212153 | CCDC191  | NM_027801_16_+1 |
| Usp19         | 3.254  | 3.479  | 4.773  | 4.658  | 4.616  | 4.213  | 4.699  | 4.383  | 5.320  | 5.031  | 71472  | USP19    | NM_027804_9_+1  |
| Ppp6r2        | 1.806  | 2.301  | 1.574  | 1.596  | 1.527  | 1.140  | 1.335  | 1.010  | 1.128  | 0.863  | 71474  | PPP6R2   | NM_027805_15_+1 |
| Cul5          | 4.680  | 4.579  | 4.854  | 4.969  | 4.932  | 4.974  | 4.848  | 4.718  | 4.941  | 5.292  | 75717  | CUL5     | NM_027807_9_-1  |
| Alpk1         | 2.263  | 2.393  | 3.860  | 2.838  | 3.662  | 3.359  | 3.595  | 3.321  | 4.432  | 4.118  | 71481  | ALPK1    | NM_027808_3_-1  |
| Bbs7          | 1.140  | 0.154  | 0.849  | 0.144  | 0.081  | 0.969  | 0.137  | -1.344 | -0.211 | 0.614  | 71492  | BBS7     | NM_027810_3_-1  |
| 9030624J02Rik | 5.274  | 5.366  | 5.980  | 6.160  | 6.603  | 6.627  | 6.189  | 6.198  | 6.273  | 6.461  | 71517  | C16orf62 | NM_027815_7_+1  |
| Cyp2u1        | 0.510  | 0.527  | -1.107 | -3.405 | -0.170 | -0.803 | -1.431 | -2.209 | -0.504 | -0.549 | 71519  | CYP2U1   | NM_027816_3_-1  |
| Grap          | 7.222  | 7.357  | 5.513  | 5.992  | 7.006  | 6.426  | 5.282  | 5.536  | 2.697  | 4.186  | 71520  | GRAP     | NM_027817_11_+1 |
| Arhgap42      | -1.902 | 0.647  | 3.499  | 4.400  | 0.903  | 3.742  | -4.088 | -0.197 | -4.981 | -4.981 | 71544  | ARHGAP42 | NM_027823_9_-1  |
| Afmid         | 4.105  | 3.765  | 2.608  | 2.596  | 3.311  | 3.274  | 2.930  | 2.771  | 2.168  | 1.769  | 71562  | AFMID    | NM_027827_11_+1 |
| Fam110c       | -4.981 | -4.981 | -4.916 | -4.257 | -4.965 | -3.896 | -1.637 | -1.271 | -4.981 | -3.386 | 104943 | FAM110C  | NM_027828_12_+1 |
| Izumo4        | 5.414  | 4.755  | 3.273  | 3.484  | 4.247  | 4.289  | 3.070  | 3.076  | 2.356  | 2.370  | 71564  | IZUMO4   | NM_027829_10_+1 |
| Mcm9          | 3.766  | 3.649  | 3.320  | 3.300  | 3.674  | 3.740  | 3.612  | 3.414  | 3.460  | 3.345  | 71567  | MCM9     | NM_027830_10_-1 |
| 913008F23Rik  | -2.388 | -4.981 | 0.510  | 0.684  | 2.387  | 2.397  | 2.679  | 2.344  | 1.559  | 2.502  | 71583  | C6orf141 | NM_027834_17_-1 |
| Ifih1         | 2.647  | 1.555  | 3.487  | 0.797  | 5.653  | 3.631  | 5.430  | 3.068  | 5.570  | 3.384  | 71586  | IFIH1    | NM_027835_2_-1  |
| Ms4a7         | 2.764  | 0.523  | 2.733  | 2.504  | 3.205  | 3.247  | 4.858  | 5.525  | 2.517  | 3.351  | 109225 | MS4A7    | NM_027836_19_-1 |
| Senp8         | 1.831  | 1.862  | 1.461  | 1.920  | 1.453  | 1.717  | 1.326  | 1.749  | 1.224  | 0.956  | 71599  | SENP8    | NM_027838_9_-1  |
| Ceacam20      | -4.981 | -2.895 | -3.830 | -3.857 | -4.573 | -4.974 | -4.582 | -4.342 | -4.981 | -4.973 | 71601  | CEACAM20 | NM_027839_7_+1  |
| Snx20         | 6.296  | 5.397  | 6.771  | 6.717  | 8.126  | 7.646  | 7.444  | 6.943  | 6.831  | 6.598  | 71607  | SNX20    | NM_027840_8_-1  |
| Arl14         | -3.563 | -0.376 | -3.843 | 0.142  | -1.128 | 0.414  | -2.089 | -1.653 | -3.189 | -2.945 | 71619  | ARL14    | NM_027843_3_+1  |
| Rarres2       | -0.735 | -1.972 | -4.146 | -3.931 | -4.361 | -3.678 | -3.834 | -2.918 | -4.981 | -4.135 | 71660  | RARRES2  | NM_027852_6_-1  |
| Tmem248       | 6.584  | 6.660  | 6.015  | 6.095  | 5.905  | 6.005  | 6.020  | 6.336  | 6.559  | 6.636  | 71667  | TMEM248  | NM_027854_5_+1  |
| Atraid        | 8.303  | 8.404  | 6.397  | 6.280  | 6.293  | 6.410  | 6.483  | 6.561  | 6.440  | 6.266  | 381629 | ATRAID   | NM_027855_5_+1  |
| Rnf215        | 4.584  | 4.479  | 4.223  | 4.205  | 4.357  | 4.179  | 4.038  | 4.232  | 4.594  | 4.556  | 71673  | RNF215   | NM_027859_11_+1 |
| 0610010F05Rik | 2.725  | 3.263  | 3.609  | 3.801  | 3.493  | 3.238  | 3.749  | 3.691  | 4.157  | 4.583  | 71675  | KIAA1841 | NM_027860_11_-1 |
| Brox          | 5.597  | 5.663  | 6.420  | 6.293  | 5.667  | 5.552  | 5.593  | 5.575  | 6.219  | 6.426  | 71678  | BROX     | NM_027861_1_-1  |
| Atp5h         | 8.976  | 8.729  | 8.514  | 8.271  | 8.330  | 8.296  | 8.509  | 8.338  | 7.688  | 7.444  | 71679  | ATP5H    | NM_027862_11_-1 |
| Galnt14       | -4.981 | -4.981 | -4.981 | -4.981 | -4.949 | -4.106 | -4.961 | -4.971 | -4.981 | -3.166 | 71685  | GALNT14  | NM_027864_17_-1 |
| Tmem25        | -1.549 | -2.353 | -0.272 | -0.907 | 0.718  | 0.305  | 0.536  | 1.503  | 1.751  | 1.331  | 71687  | TMEM25   | NM_027865_9_-1  |
| Colec11       | -3.843 | -4.981 | -4.979 | -4.979 | -4.895 | -4.976 | -4.898 | -4.317 | -2.485 | -4.981 | 71693  | COLEC11  | NM_027866_12_-1 |
| Slc41a3       | 2.232  | 2.867  | 3.058  | 2.995  | 2.649  | 2.806  | 3.864  | 4.193  | 5.131  | 4.712  | 71699  | SLC41A3  | NM_027868_6_+1  |
| Pnpt1         | 4.471  | 4.270  | 4.944  | 4.536  | 4.869  | 4.455  | 4.696  | 4.731  | 5.388  | 5.167  | 71701  | PNPT1    | NM_027869_11_+1 |
| Armxc3        | 5.537  | 5.316  | 4.655  | 4.660  | 3.754  | 3.804  | 3.974  | 4.736  | 4.371  | 5.104  | 71703  | ARMCX3   | NM_027870_X_+1  |
| Arhgef3       | 0.511  | 0.294  | 0.544  | 0.911  | 2.362  | 1.274  | 2.907  | 1.265  | 4.369  | 4.819  | 71704  | ARHGEF3  | NM_027871_14_+1 |
| Slc46a3       | 6.544  | 6.779  | 8.306  | 8.538  | 9.425  | 9.460  | 8.577  | 8.276  | 6.682  | 6.702  | 71706  | SLC46A3  | NM_027872_5_-1  |
| Ubiad1        | 3.190  | 3.969  | 2.719  | 3.944  | 2.811  | 3.617  | 2.806  | 4.139  | 3.561  | 4.761  | 71707  | UBIAD1   | NM_027873_4_-1  |
| Csnk1d        | 5.534  | 5.660  | 6.749  | 6.874  | 5.828  | 6.142  | 5.903  | 6.197  | 6.530  | 6.672  | 104318 | CSNK1D   | NM_027874_11_-1 |
| Syde1         | -1.901 | -4.981 | -4.776 | -3.059 | -3.874 | -4.687 | -3.394 | -3.324 | -4.981 | -4.227 | 71709  | SYDE1    | NM_027875_10_-1 |
| Mus81         | 4.583  | 4.715  | 4.004  | 4.306  | 4.252  | 4.601  | 3.588  | 4.021  | 3.886  | 4.195  | 71711  | MUS81    | NM_027877_19_-1 |
| Dram1         | -0.458 | -1.594 | 0.733  | 0.681  | 1.102  | 1.357  | 4.628  | 5.410  | 6.479  | 6.519  | 71712  | DRAM1    | NM_027878_10_-1 |
| Cdc40         | 4.736  | 5.135  | 5.526  | 5.339  | 5.610  | 5.557  | 5.894  | 5.609  | 6.368  | 6.427  | 71713  | CDC40    | NM_027879_10_-1 |
| Telo2         | 0.359  | 1.306  | 0.958  | 1.210  | 0.881  | 1.042  | 1.107  | 0.199  | -4.442 | 0.100  | 71718  | TELO2    | NM_027880_17_-1 |
| Osbpl3        | -0.155 | -0.820 | 1.922  | 0.866  | 1.662  | 1.382  | 1.473  | 1.130  | -0.431 | -0.755 | 71720  | OSBPL3   | NM_027881_6_-1  |
| Cic           | 0.464  | 1.684  | 0.877  | 0.847  | 0.013  | -1.161 | 1.943  | 1.048  | 2.878  | 2.883  | 71722  | CIC      | NM_027882_7_+1  |
| Dhx34         | 3.109  | 3.523  | 3.132  | 3.731  | 2.741  | 3.643  | 3.003  | 3.317  | 4.815  | 5.193  | 71723  | DHX34    | NM_027883_7_-1  |
| Tns1          | 3.039  | 2.907  | 0.080  | -0.093 | 1.943  | 2.424  | 1.221  | -0.441 | -2.115 | -2.534 | 21961  | TNS1     | NM_027884_1_-1  |
| Smug1         | 2.392  | 2.215  | 2.081  | 1.661  | 2.363  | 2.119  | 2.030  | 2.438  | 3.322  | 3.240  | 71726  | SMUG1    | NM_027885_15_-1 |
| Stk11ip       | 4.416  | 4.619  | 3.606  | 3.816  | 4.395  | 4.645  | 4.171  | 4.414  | 5.776  | 5.651  | 71728  | STK11IP  | NM_027886_1_+1  |
| Vps11         | 5.362  | 5.446  | 6.015  | 5.890  | 5.969  | 5.816  | 5.656  | 5.519  | 6.185  | 5.940  | 71732  | VPS11    | NM_027889_9_-1  |
| Susd2         | -4.863 | -4.616 | 0.278  | 0.999  | 3.093  | 3.123  | 0.023  | 1.694  | -4.766 | -2.091 | 71733  | SUSD2    | NM_027890_10_-1 |
| Lrwd1         | 4.850  | 5.022  | 5.107  | 5.188  | 5.040  | 5.093  | 5.385  | 5.440  | 6.044  | 5.921  | 71735  | LRWD1    | NM_027891_5_-1  |
| Ppp1r12a      | 4.516  | 4.845  | 5.675  | 5.799  | 5.552  | 5.853  | 5.537  | 5.411  | 5.226  | 5.269  | 17931  | PPP1R12A | NM_027892_10_+1 |
| Nectin4       | 2.675  | 2.665  | 1.089  | 1.579  | 1.371  | 2.219  | 1.351  | 1.233  | 2.976  | 3.208  | 71740  | NECTIN4  | NM_027893_1_+1  |
| Ulk3          | 3.337  | 3.372  | 3.853  | 3.329  | 4.010  | 3.485  | 3.538  | 3.574  | 3.739  | 3.680  | 71742  | ULK3     | NM_027895_9_+1  |
| Rhpn2         | -2.647 | -2.600 | -4.979 | -3.095 | -4.103 | -4.270 | -3.248 | -3.377 | -4.981 | -2.526 | 52428  | RHPN2    | NM_027897_7_+1  |
| Gramd1a       | 5.366  | 5.435  | 5.042  | 5.174  | 5.675  | 5.832  | 5.828  | 6.078  | 5.836  | 6.192  | 52857  | GRAMD1A  | NM_027898_7_-1  |
| R3hdm2        | -0.917 | -4.497 | -0.222 | -0.407 | -1.368 | -0.576 | -1.702 | -1.375 | 0.264  | -0.194 | 71750  | R3HDM2   | NM_027900_10_+1 |
| Gtf3c2        | 5.428  | 5.443  | 5.493  | 5.568  | 6.092  | 5.991  | 6.017  | 5.998  | 6.428  | 6.270  | 71752  | GTF3C2   | NM_027901_5_-1  |
| Dhdh          | 1.457  | 1.218  | 1.787  | 2.051  | 1.552  | 1.945  | 1.644  | 1.624  | 2.420  | 2.470  | 71755  | DHDH     | NM_027903_7_-1  |
| Selo          | 5.031  | 5.111  | 5.457  | 5.507  | 4.890  | 4.754  | 4.757  | 5.065  | 5.035  | 5.119  | 223776 | SELENOO  | NM_027905_15_+1 |

|               |        |        |        |        |        |        |        |        |        |        |        |           |                  |
|---------------|--------|--------|--------|--------|--------|--------|--------|--------|--------|--------|--------|-----------|------------------|
| Vwa8          | 2.080  | 1.052  | 2.314  | 2.592  | 2.478  | 2.464  | 2.332  | 2.182  | 2.148  | 2.706  | 219189 | VWA8      | NM_027906_14_+_1 |
| Amdhd1        | 2.818  | 4.932  | -2.148 | -0.755 | -0.061 | 3.868  | -1.289 | 1.103  | -2.472 | -2.976 | 71761  | AMDHD1    | NM_027908_10_-_1 |
| C2cd2l        | 2.364  | 2.118  | 4.214  | 4.300  | 2.836  | 3.118  | 2.831  | 2.972  | 4.485  | 4.109  | 71764  | C2CD2L    | NM_027909_9_-_1  |
| Klhdc3        | 5.124  | 5.116  | 5.820  | 6.102  | 5.833  | 6.082  | 5.762  | 5.997  | 6.874  | 6.704  | 71765  | KLHDC3    | NM_027910_17_-_1 |
| Raver1        | 3.859  | 3.861  | 4.588  | 4.660  | 4.706  | 4.403  | 4.297  | 4.206  | 5.174  | 5.031  | 71766  | RAVER1    | NM_027911_9_-_1  |
| Tysnd1        | 3.956  | 3.367  | 3.902  | 4.107  | 4.027  | 4.338  | 3.864  | 4.105  | 4.933  | 4.882  | 71767  | TYSND1    | NM_027912_10_+_1 |
| Bbs10         | 1.039  | -0.558 | 1.317  | 0.874  | 0.580  | 1.097  | 0.747  | 0.650  | 0.921  | 0.964  | 71769  | BBS10     | NM_027914_10_+_1 |
| Ap2b1         | 4.419  | 4.347  | 4.917  | 5.143  | 4.683  | 4.707  | 4.180  | 4.744  | 4.109  | 4.516  | 71770  | NA        | NM_027915_11_+_1 |
| Shroom1       | -4.981 | -4.981 | -1.189 | 0.121  | -4.935 | -4.224 | -2.684 | -0.998 | -1.090 | -1.021 | 71774  | SHROOM1   | NM_027917_11_+_1 |
| 1300017J02Rik | -4.981 | -0.058 | -2.426 | 0.435  | -3.061 | 0.507  | -3.252 | 0.016  | -3.925 | -0.992 | 71775  | NA        | NM_027918_9_-_1  |
| Tha1          | 3.191  | 3.074  | 1.355  | 0.377  | 2.144  | 1.985  | 1.841  | 2.191  | 1.485  | 1.845  | 71776  | NA        | NM_027919_11_-_1 |
| March8        | -1.611 | -4.159 | -0.515 | 0.766  | -0.403 | 0.036  | 0.969  | 1.548  | 2.494  | 2.991  | 71779  | MARCH8    | NM_027920_6_+_1  |
| Slc16a14      | -4.981 | -4.981 | -4.231 | -4.008 | 2.129  | -0.217 | 0.704  | -1.503 | -1.477 | -0.349 | 71781  | SLC16A14  | NM_027921_1_-_1  |
| Ankle2        | 3.654  | 3.429  | 2.255  | 2.862  | 2.842  | 2.977  | 3.445  | 3.066  | 3.930  | 4.192  | 71782  | ANKLE2    | NM_027922_5_+_1  |
| Trnau1ap      | 5.576  | 5.372  | 5.765  | 5.743  | 5.519  | 5.431  | 5.596  | 5.479  | 4.775  | 4.564  | 71787  | TRNAU1AP  | NM_027925_4_-_1  |
| Ints12        | 5.333  | 5.244  | 4.681  | 4.581  | 4.519  | 4.622  | 4.789  | 4.798  | 5.590  | 5.587  | 71793  | INTS12    | NM_027927_3_+_1  |
| Chst13        | -4.981 | -4.981 | -4.925 | -3.512 | -4.955 | -4.206 | -1.501 | -1.440 | 1.620  | 1.400  | 71797  | CHST13    | NM_027928_6_-_1  |
| Mtfr2         | -1.679 | -0.345 | 1.005  | 1.133  | 0.736  | 0.953  | 0.987  | 0.171  | 1.520  | 1.132  | 71804  | MTFR2     | NM_027930_10_+_1 |
| Tars2         | 4.823  | 4.970  | 4.679  | 4.879  | 5.002  | 5.091  | 4.777  | 5.112  | 4.210  | 4.350  | 71807  | TARS2     | NM_027931_3_-_1  |
| Ranbp3        | 5.846  | 5.884  | 5.896  | 6.116  | 5.846  | 5.643  | 5.620  | 5.587  | 5.410  | 5.039  | 71810  | RANBP3    | NM_027933_17_+_1 |
| Rnf180        | 2.920  | 2.443  | 4.085  | 4.222  | 0.603  | 0.639  | 1.033  | 1.122  | -2.060 | 0.842  | 71816  | RNF180    | NM_027934_13_-_1 |
| Tmem50a       | 9.101  | 9.247  | 7.372  | 7.269  | 7.410  | 7.381  | 7.972  | 8.070  | 8.404  | 8.188  | 71817  | TMEM50A   | NM_027935_4_-_1  |
| Caskin1       | -4.981 | -2.239 | -1.347 | -3.230 | -1.635 | -2.018 | -2.341 | -1.492 | -1.577 | -1.773 | 268932 | CASKIN1   | NM_027937_17_+_1 |
| Lrrc34        | -4.981 | -1.589 | -4.960 | -4.960 | -4.962 | -4.962 | -4.976 | -4.900 | -4.981 | -1.924 | 71827  | LRRC34    | NM_027941_3_-_1  |
| Pdilt         | -4.981 | -4.981 | -4.969 | -2.654 | -4.977 | -4.575 | -4.974 | -4.978 | -4.981 | -4.981 | 71830  | PDILT     | NM_027943_7_-_1  |
| Dcaf7         | 6.255  | 6.014  | 6.669  | 6.358  | 6.595  | 6.380  | 6.466  | 6.382  | 7.043  | 6.808  | 71833  | DCAF7     | NM_027946_11_+_1 |
| Zbtb43        | 2.061  | 0.170  | 2.343  | 1.634  | 2.460  | 2.181  | 0.605  | 1.796  | 2.891  | 2.543  | 71834  | ZBTB43    | NM_027947_2_-_1  |
| 1700003E16Rik | -4.981 | -4.981 | -1.152 | -1.957 | -0.119 | 0.583  | -1.516 | -2.159 | -1.603 | -4.342 | 71837  | C2orf81   | NM_027948_6_+_1  |
| Phf7          | 4.639  | 3.889  | 3.650  | 3.576  | 3.469  | 3.036  | 3.804  | 3.324  | 3.796  | 3.499  | 71838  | PHF7      | NM_027949_14_-_1 |
| Osgin1        | -0.328 | -0.686 | 2.759  | 3.365  | 3.191  | 3.660  | 3.174  | 3.148  | 3.364  | 3.130  | 71839  | OSGIN1    | NM_027950_8_+_1  |
| Syce2         | 4.086  | 2.382  | 3.869  | 3.278  | 4.422  | 3.465  | 4.189  | 3.019  | 1.576  | -0.118 | 71846  | SYCE2     | NM_027954_8_+_1  |
| Fam178b       | -0.554 | 1.296  | -2.232 | -0.755 | -4.971 | -4.971 | -3.589 | -4.926 | -4.190 | -4.981 | 381337 | FAM178B   | NM_027957_1_-_1  |
| Pdia6         | 8.878  | 9.069  | 8.541  | 9.062  | 7.658  | 7.914  | 7.879  | 8.882  | 7.899  | 8.503  | 71853  | PDIA6     | NM_027959_12_+_1 |
| Dpep3         | -4.981 | -4.981 | -2.676 | -3.016 | -4.970 | -4.776 | -3.022 | -3.048 | -1.789 | -1.516 | 71854  | DPEP3     | NM_027960_8_-_1  |
| Gpr160        | 3.829  | 3.671  | 0.749  | -0.992 | -0.668 | -1.508 | 1.057  | 1.817  | 3.223  | 3.134  | 71862  | GPR160    | NM_027965_3_+_1  |
| Fam217a       | -4.981 | -4.981 | -4.981 | -4.981 | -4.050 | -4.994 | -3.687 | -4.931 | -4.981 | -4.981 | 71864  | FAM217A   | NM_027967_13_-_1 |
| Fbxo30        | 0.915  | 1.019  | 2.847  | 2.950  | 2.833  | 2.593  | 2.977  | 3.414  | 3.723  | 4.041  | 71865  | FBXO30    | NM_027968_10_+_1 |
| Thegl         | -4.981 | -4.981 | -4.715 | -3.574 | -3.491 | -3.610 | -4.602 | -3.952 | -1.754 | -2.982 | 71868  | THEGL     | NM_027970_5_+_1  |
| Serpinb12     | -4.981 | -4.981 | -4.753 | -3.592 | -4.967 | -4.970 | -4.977 | -4.981 | -3.373 | -4.857 | 71869  | SERPINB12 | NM_027971_1_+_1  |
| Cfap45        | -0.521 | -0.061 | -3.289 | -2.297 | -3.445 | -4.523 | -3.983 | -4.796 | -0.845 | -3.498 | 71870  | CFAP45    | NM_027972_1_+_1  |
| Cenpu         | 1.655  | 2.366  | 1.748  | 1.582  | 2.467  | 2.161  | 1.688  | 1.843  | 1.652  | 0.575  | 71876  | CENPU     | NM_027973_8_+_1  |
| Efhc1         | 0.849  | 0.457  | -1.997 | -1.519 | -0.400 | -0.505 | -1.498 | -2.186 | -3.925 | -1.378 | 71877  | EFHC1     | NM_027974_1_+_1  |
| Fam83d        | 0.586  | 1.916  | -0.120 | 0.132  | 0.897  | 0.508  | -0.260 | -0.728 | 1.330  | 0.748  | 71878  | FAM83D    | NM_027975_2_+_1  |
| Acs15         | 6.607  | 6.836  | 7.244  | 7.473  | 7.497  | 7.748  | 7.240  | 7.403  | 7.460  | 7.470  | 433256 | ACSL5     | NM_027976_19_+_1 |
| Apmap         | 5.303  | 5.742  | 4.634  | 4.676  | 4.877  | 5.113  | 4.996  | 5.017  | 5.084  | 5.001  | 71881  | APMAP     | NM_027977_2_-_1  |
| Coq2          | 6.478  | 6.322  | 6.256  | 6.268  | 5.810  | 6.057  | 5.781  | 5.696  | 5.453  | 5.342  | 71883  | COQ2      | NM_027978_5_-_1  |
| Chit1         | -4.981 | -2.022 | -4.981 | -4.981 | -4.376 | -2.797 | -4.413 | -1.358 | 1.382  | -2.614 | 71884  | CHIT1     | NM_027979_1_+_1  |
| Faap100       | 3.071  | 3.392  | 3.409  | 3.643  | 3.048  | 3.205  | 3.301  | 3.714  | 3.903  | 4.108  | 71885  | FAAP100   | NM_027980_11_-_1 |
| Ppm1j         | -1.295 | -4.981 | 0.691  | 0.967  | -1.412 | 0.275  | -3.736 | -1.255 | -2.989 | -3.758 | 71887  | PPM1J     | NM_027982_3_+_1  |
| Mad2l2        | 5.563  | 5.556  | 5.075  | 5.144  | 4.632  | 4.699  | 4.677  | 4.893  | 4.176  | 4.074  | 71890  | MAD2L2    | NM_027985_4_+_1  |
| Cdadcl        | 4.652  | 4.836  | 4.157  | 4.033  | 3.756  | 3.693  | 3.969  | 4.120  | 4.695  | 4.331  | 71891  | CDADC1    | NM_027986_14_-_1 |
| Cd300lg       | -1.220 | -1.318 | -0.546 | -0.914 | 0.997  | 0.501  | 2.872  | 3.374  | 5.431  | 4.902  | 52685  | CD300LG   | NM_027987_11_+_1 |
| Noxo1         | 0.770  | 0.225  | 0.388  | 1.653  | 0.809  | 1.495  | 0.654  | 1.924  | 0.515  | 1.686  | 71893  | NOXO1     | NM_027988_17_+_1 |
| Lypd6b        | -2.739 | -4.981 | -4.623 | -4.177 | -3.260 | -2.506 | -4.144 | -3.196 | -3.750 | -3.498 | 71897  | LYPD6B    | NM_027990_2_+_1  |
| Tmem106b      | 6.226  | 6.439  | 5.860  | 5.668  | 5.872  | 6.129  | 5.302  | 5.531  | 5.309  | 5.736  | 71900  | TMEM106B  | NM_027992_6_+_1  |
| Fam219a       | -3.655 | -1.031 | -1.674 | -1.155 | -2.618 | -2.585 | -2.634 | -2.820 | -1.417 | -4.495 | 71901  | FAM219A   | NM_027993_4_-_1  |
| Cand1         | 5.080  | 4.958  | 5.923  | 5.993  | 5.515  | 5.438  | 5.555  | 5.518  | 5.691  | 5.880  | 71902  | CAND1     | NM_027994_10_-_1 |
| Paqr7         | 3.142  | 0.616  | 0.657  | -0.621 | 2.600  | 1.416  | 2.238  | 1.938  | 4.215  | 3.337  | 71904  | PAQR7     | NM_027995_4_+_1  |
| Zswim8        | 2.300  | 3.299  | 4.111  | 2.856  | 3.787  | 3.630  | 2.995  | 3.338  | 4.445  | 4.374  | 268721 | ZSWIM8    | NM_027996_14_+_1 |
| Haus5         | 4.270  | 3.822  | 4.106  | 3.851  | 5.517  | 4.947  | 5.090  | 4.163  | 3.464  | 2.226  | 71909  | HAUS5     | NM_027999_7_-_1  |
| Plpp5         | 5.492  | 5.185  | 4.082  | 4.297  | 2.708  | 3.131  | 2.979  | 4.315  | 3.579  | 3.945  | 71910  | PLPP5     | NM_028000_8_+_1  |
| Jsrp1         | -4.981 | -4.981 | -3.335 | -3.964 | -4.981 | -4.981 | -4.736 | -4.974 | -4.981 | -4.981 | 71912  | JSRP1     | NM_028001_10_-_1 |
| Dus4l         | 1.499  | 1.587  | 1.674  | 1.404  | 1.026  | 1.056  | 1.054  | 0.870  | 0.920  | 0.487  | 71916  | DUS4L     | NM_028002_12_-_1 |
| Rpap3         | 4.244  | 4.507  | 3.373  | 3.548  | 3.468  | 3.794  | 3.354  | 3.509  | 3.314  | 3.310  | 71919  | RPA3      | NM_028003_15_-_1 |
| Ttn           | -1.001 | -1.150 | -0.143 | -1.442 | 5.175  | 2.427  | 0.037  | -0.782 | -0.728 | -1.660 | 22138  | TTN       | NM_028004_2_-_1  |
| Borcs6        | 2.760  | 3.033  | 3.179  | 3.046  | 2.997  | 3.038  | 3.235  | 3.235  | 3.880  | 3.797  | 71923  | BORCS6    | NM_028005_11_+_1 |
| Tube1         | 0.807  | 1.071  | 1.360  | 1.142  | 1.735  | 1.328  | 1.177  | 0.897  | 0.111  | 0.143  | 71924  | TUBE1     | NM_028006_10_+_1 |
| Itfg1         | 6.839  | 6.920  | 6.592  | 6.659  | 6.156  | 6.159  | 6.115  | 6.230  | 6.201  | 6.606  | 71927  | ITFG1     | NM_028007_8_-_1  |
| Rpusd1        | 3.621  | 3.698  | 3.237  | 2.996  | 3.048  | 3.073  | 2.812  | 2.913  | 2.746  | 2.703  | 106707 | RPUSD1    | NM_028009_17_+_1 |
| Tom1l1        | -2.538 | -0.215 | -3.926 | -0.317 | -1.973 | -0.159 | -1.908 | -0.536 | -1.093 | -1.351 | 71943  | TOM1L1    | NM_028011_11_-_1 |
| Xrcc4         | 4.827  | 4.601  | 3.903  | 3.922  | 3.957  | 4.046  | 3.571  | 3.569  | 3.433  | 3.463  | 108138 | XRCC4     | NM_028012_13_-_1 |
| Endod1        | 3.596  | 3.523  | 6.181  | 6.304  | 3.054  | 3.745  | 3.966  | 5.330  | 4.548  | 5.592  | 71946  | ENDOD1    | NM_028013_9_-_1  |
| Tmem94        | 2.785  | 2.438  | 3.695  | 3.869  | 3.857  | 3.912  | 3.897  | 4.060  | 4.603  | 4.848  | 71947  | TMEM94    | NM_028014_11_+_1 |
| Cers5         | 5.598  | 5.917  | 5.820  | 6.278  | 5.305  | 5.491  | 5.780  | 5.924  | 6.215  | 6.453  | 71949  | CERS5     | NM_028015_15_-_1 |

|               |        |        |        |        |        |        |        |        |        |        |        |              |                 |
|---------------|--------|--------|--------|--------|--------|--------|--------|--------|--------|--------|--------|--------------|-----------------|
| Nanog         | -4.620 | -4.394 | -4.774 | -4.914 | -4.058 | -4.926 | -4.903 | -4.960 | -4.746 | -4.924 | 71950  | NANOG        | NM_028016_6_+1  |
| Napg          | 4.363  | 4.739  | 5.008  | 4.946  | 5.517  | 5.424  | 5.499  | 5.159  | 5.537  | 5.772  | 108123 | NAPG         | NM_028017_18_+1 |
| Ist1          | 6.357  | 6.573  | 6.478  | 6.361  | 6.541  | 6.302  | 6.729  | 6.668  | 7.363  | 7.030  | 71955  | IST1         | NM_028018_8_-1  |
| Rnf135        | 3.892  | 3.752  | 4.147  | 4.351  | 4.232  | 4.034  | 3.903  | 3.636  | 3.419  | 3.597  | 71956  | RNF135       | NM_028019_11_+1 |
| Cpsf3l        | 5.236  | 5.739  | 6.040  | 6.450  | 5.594  | 5.884  | 5.378  | 6.138  | 5.589  | 5.973  | 71957  | CPSF3L       | NM_028020_4_+1  |
| Myh14         | 1.510  | 1.666  | -4.312 | -3.723 | -4.706 | -4.949 | -4.949 | -4.695 | -4.981 | -4.981 | 71960  | MYH14        | NM_028021_7_-1  |
| Gatsl3        | -1.177 | -2.160 | 1.950  | 2.101  | 3.160  | 2.783  | 2.828  | 2.358  | 1.300  | 1.860  | 71962  | GATSL3       | NM_028022_11_+1 |
| Cdca4         | 4.581  | 4.575  | 5.169  | 5.255  | 4.544  | 4.233  | 4.696  | 4.768  | 5.102  | 4.867  | 71963  | CDCA4        | NM_028023_12_-1 |
| Nkiras2       | 5.026  | 4.888  | 5.066  | 5.174  | 4.536  | 4.537  | 5.703  | 6.008  | 7.580  | 7.344  | 71966  | NKIRAS2      | NM_028024_11_+1 |
| Mageb16       | -4.981 | -4.981 | -4.976 | -4.950 | -4.980 | -4.979 | -4.981 | -4.981 | -4.981 | -4.981 | 71967  | MAGEB16      | NM_028025_X_-1  |
| Wdr73         | 4.530  | 4.853  | 4.142  | 3.880  | 3.758  | 3.847  | 3.668  | 3.397  | 3.360  | 3.111  | 71968  | WDR73        | NM_028026_7_-1  |
| Arhgef25      | -4.566 | -3.595 | -2.877 | -2.129 | -2.770 | -1.555 | -4.824 | -4.821 | -4.824 | -4.748 | 52666  | ARHGEF25     | NM_028027_10_-1 |
| Zswim1        | 3.613  | 3.620  | 3.198  | 3.459  | 3.483  | 3.478  | 3.572  | 3.591  | 3.962  | 3.508  | 71971  | ZSWIM1       | NM_028028_2_+1  |
| Dnmbp         | 3.092  | 3.401  | 4.964  | 4.844  | 3.507  | 3.622  | 3.111  | 3.182  | 2.881  | 3.410  | 71972  | DNMBP        | NM_028029_19_-1 |
| Rbpms2        | -1.751 | -4.981 | -3.252 | -1.429 | -2.753 | -4.103 | -2.510 | -3.635 | -1.702 | -0.670 | 71973  | RBPMS2       | NM_028030_9_+1  |
| Zdhhc13       | 6.788  | 7.138  | 5.568  | 5.764  | 5.396  | 5.538  | 5.014  | 5.400  | 5.368  | 5.331  | 243983 | ZDHHC13      | NM_028031_7_+1  |
| Ppp2r2a       | 5.975  | 6.358  | 5.924  | 6.076  | 5.971  | 5.974  | 5.939  | 6.050  | 5.888  | 5.955  | 71978  | PPP2R2A      | NM_028032_14_-1 |
| Tdrd12        | -2.178 | -3.408 | -3.745 | -3.823 | -4.980 | -4.465 | -4.923 | -4.708 | -2.834 | -2.518 | 71981  | LOC101929327 | NM_028034_7_-1  |
| Snx10         | -0.522 | -0.081 | 0.784  | 1.119  | 1.649  | 2.187  | 1.613  | 1.269  | 1.529  | 3.150  | 71982  | SNX10        | NM_028035_6_+1  |
| Tmco6         | 4.953  | 5.268  | 3.856  | 3.934  | 3.607  | 3.871  | 3.546  | 3.790  | 2.978  | 3.251  | 71983  | TMCO6        | NM_028036_18_+1 |
| Acad10        | 2.202  | 1.307  | 1.760  | 1.675  | 1.716  | 1.690  | 1.397  | 1.163  | 1.886  | 1.479  | 71985  | ACAD10       | NM_028037_5_-1  |
| Ddx28         | 3.466  | 3.239  | 3.489  | 3.533  | 3.479  | 3.405  | 3.758  | 3.615  | 4.768  | 4.286  | 71986  | DDX28        | NM_028038_8_-1  |
| Esko2         | -1.413 | -1.213 | 2.081  | 2.186  | 3.427  | 2.668  | 2.567  | 2.016  | 1.572  | 0.566  | 71988  | ESCO2        | NM_028039_14_-1 |
| Rpusd4        | 4.661  | 4.589  | 4.687  | 4.726  | 4.509  | 4.407  | 4.465  | 4.634  | 4.596  | 4.629  | 71989  | RPUSD4       | NM_028040_9_+1  |
| Ddx54         | 5.237  | 5.116  | 5.750  | 5.880  | 6.014  | 6.060  | 5.921  | 5.987  | 6.157  | 5.765  | 71990  | DDX54        | NM_028041_5_+1  |
| Erccl         | 3.467  | 3.886  | 2.895  | 2.724  | 3.559  | 3.163  | 2.867  | 2.856  | 2.902  | 2.849  | 71991  | ERCC8        | NM_028042_13_+1 |
| Cnot11        | 4.671  | 4.536  | 4.966  | 5.022  | 4.858  | 4.709  | 4.422  | 4.333  | 4.475  | 4.604  | 52846  | CNOT11       | NM_028043_1_+1  |
| Cnn3          | 2.786  | 1.971  | 2.688  | 2.920  | 1.546  | 2.269  | 2.748  | 4.135  | 2.756  | 3.039  | 71994  | CNN3         | NM_028044_3_+1  |
| Smg9          | 3.834  | 3.186  | 3.695  | 3.331  | 3.859  | 3.283  | 4.040  | 3.569  | 4.244  | 3.562  | 71997  | SMG9         | NM_028047_7_+1  |
| Slc25a35      | 4.894  | 4.440  | 3.921  | 3.701  | 3.647  | 4.251  | 3.452  | 3.241  | 3.095  | 2.648  | 71998  | SLC25A35     | NM_028048_11_+1 |
| Fbxo22        | 5.725  | 5.823  | 5.021  | 5.124  | 5.365  | 5.318  | 5.201  | 5.136  | 5.345  | 5.568  | 71999  | FBXO22       | NM_028049_9_+1  |
| Lmntd2        | 1.111  | 0.937  | 2.044  | 2.195  | 1.406  | 1.526  | -0.232 | 0.250  | -4.981 | -3.498 | 72000  | LMNTD2       | NM_028050_7_-1  |
| Tmem38b       | 4.001  | 4.354  | 3.173  | 3.715  | 2.609  | 3.051  | 4.051  | 4.154  | 6.312  | 6.275  | 52076  | TMEM38B      | NM_028053_4_+1  |
| Zfyve19       | 5.684  | 5.629  | 4.983  | 4.341  | 4.632  | 3.840  | 4.625  | 3.674  | 4.038  | 3.702  | 72008  | ZFYVE19      | NM_028054_2_+1  |
| 1600002H07Rik | 2.831  | 2.371  | 0.934  | 0.872  | 1.572  | 1.604  | 2.104  | 1.797  | 2.197  | 0.492  | 72016  | C16orf59     | NM_028056_17_-1 |
| Cyb5r1        | 3.334  | 3.847  | 6.654  | 7.009  | 3.963  | 4.360  | 5.296  | 6.020  | 6.740  | 6.676  | 72017  | CYB5R1       | NM_028057_1_+1  |
| Fundc1        | 7.039  | 6.982  | 7.448  | 7.540  | 6.584  | 6.474  | 6.531  | 6.487  | 5.603  | 6.208  | 72018  | FUNDC1       | NM_028058_X_-1  |
| Zfp654        | 3.360  | 3.003  | 3.691  | 3.299  | 3.481  | 3.153  | 3.631  | 3.428  | 3.503  | 4.139  | 72020  | ZNF654       | NM_028059_16_-1 |
| Slc35f2       | 0.560  | 0.000  | -1.722 | -1.413 | -0.655 | -2.151 | -2.363 | -0.742 | -4.981 | -2.261 | 72022  | SLC35F2      | NM_028060_9_+1  |
| Cyb561d1      | -0.439 | 2.142  | 1.169  | 0.188  | 1.602  | 0.979  | 1.996  | 1.371  | 2.811  | 3.418  | 72023  | CYB561D1     | NM_028061_3_-1  |
| Trmu          | 4.412  | 3.819  | 3.194  | 2.932  | 3.638  | 3.502  | 3.326  | 3.285  | 2.753  | 2.476  | 72026  | TRMU         | NM_028063_15_+1 |
| Slc39a4       | 0.066  | 0.851  | -3.696 | -1.056 | -1.972 | -0.524 | -0.392 | -0.077 | -0.025 | -0.801 | 72027  | SLC39A4      | NM_028064_15_-1 |
| Cnpy3         | 7.460  | 7.723  | 6.868  | 7.126  | 7.524  | 7.352  | 7.267  | 7.298  | 7.055  | 7.344  | 72029  | CNPY3        | NM_028065_17_-1 |
| Cdhr5         | -0.928 | -0.070 | -4.261 | -4.557 | -4.965 | -4.965 | -3.113 | -4.632 | -2.753 | -3.181 | 72040  | CDHR5        | NM_028069_7_-1  |
| Alkbh4        | 4.076  | 3.908  | 3.106  | 3.250  | 3.516  | 3.466  | 3.487  | 3.559  | 3.945  | 3.889  | 72041  | ALKBH4       | NM_028070_5_+1  |
| Cotl1         | 3.510  | 2.463  | 6.493  | 7.389  | 8.281  | 8.854  | 8.145  | 7.306  | 8.134  | 7.990  | 72042  | COTL1        | NM_028071_8_-1  |
| Sulf2         | -1.113 | -1.988 | 5.823  | 5.773  | 7.359  | 7.554  | 7.543  | 7.319  | 6.892  | 7.324  | 72043  | SULF2        | NM_028072_2_-1  |
| Ddx42         | 5.527  | 5.502  | 6.009  | 6.104  | 6.490  | 6.400  | 6.331  | 6.144  | 6.106  | 6.158  | 72047  | DDX42        | NM_028074_11_+1 |
| Tnfrsf13c     | 4.274  | 3.643  | 1.657  | 2.014  | 3.099  | 3.693  | 3.091  | 4.636  | -1.257 | 0.107  | 72049  | TNFRSF13C    | NM_028075_15_-1 |
| Tmub2         | 5.893  | 5.663  | 5.036  | 4.864  | 4.995  | 5.312  | 5.215  | 5.263  | 5.509  | 5.193  | 72053  | TMUB2        | NM_028076_11_+1 |
| 1810055G02Rik | 2.536  | 3.266  | 1.732  | 2.659  | 1.657  | 1.914  | 1.551  | 2.126  | 2.819  | 2.135  | 72056  | C11orf24     | NM_028077_19_+1 |
| Lrif1         | -2.208 | 0.679  | 1.542  | 1.025  | 1.257  | 1.068  | 1.836  | -0.061 | 0.776  | 0.231  | 321000 | LRIF1        | NM_028081_3_+1  |
| Cnot2         | 2.261  | 3.660  | 2.517  | 2.325  | 3.039  | 2.395  | 2.751  | 2.473  | 3.160  | 2.624  | 72068  | CNOT2        | NM_028082_10_-1 |
| Chaf1b        | 2.853  | 2.406  | 3.675  | 3.934  | 4.046  | 3.694  | 3.512  | 3.530  | 2.835  | 2.049  | 110749 | CHAF1B       | NM_028083_16_+1 |
| Mettl10       | 5.590  | 5.854  | 4.725  | 4.768  | 4.867  | 4.780  | 4.418  | 4.311  | 3.323  | 3.599  | 72096  | METTL10      | NM_028095_7_-1  |
| 2010300C02Rik | -3.090 | 0.834  | -4.958 | -1.850 | -1.975 | -1.294 | -4.286 | -1.795 | -4.981 | -4.981 | 72097  | KIAA1211L    | NM_028096_1_-1  |
| Tmem68        | 5.217  | 5.336  | 4.859  | 4.594  | 5.356  | 5.491  | 5.272  | 5.230  | 5.112  | 5.592  | 72098  | TMEM68       | NM_028097_4_-1  |
| Dusp11        | 5.836  | 6.092  | 6.449  | 6.190  | 6.494  | 6.336  | 6.439  | 6.163  | 6.457  | 6.389  | 72102  | DUSP11       | NM_028099_6_-1  |
| Jmjd8         | 5.368  | 5.578  | 5.196  | 5.164  | 5.040  | 5.056  | 4.852  | 5.078  | 4.861  | 4.727  | 72106  | JMJD8        | NM_028101_17_+1 |
| Dhdh2         | 4.502  | 4.794  | 4.169  | 4.146  | 4.039  | 4.363  | 3.839  | 3.640  | 3.969  | 4.139  | 72108  | DDHD2        | NM_028102_8_-1  |
| Ppp1r14d      | -4.981 | -4.981 | -4.394 | -4.989 | -4.981 | -4.981 | -4.956 | -4.969 | -4.981 | -4.981 | 72112  | PPP1R14D     | NM_028104_2_-1  |
| Adck1         | 2.516  | 2.436  | 2.758  | 1.979  | 2.947  | 2.416  | 2.314  | 2.390  | 2.116  | 0.302  | 72113  | ADCK1        | NM_028105_12_+1 |
| Zbed3         | 1.429  | 1.589  | 2.022  | 2.388  | 1.395  | 1.858  | 0.373  | 0.816  | 1.059  | 0.343  | 72114  | ZBED3        | NM_028106_13_+1 |
| Naa50         | 6.399  | 6.515  | 6.626  | 6.627  | 6.318  | 6.629  | 6.420  | 6.563  | 6.128  | 6.633  | 72117  | NAA50        | NM_028108_16_+1 |
| Tpx2          | -3.985 | -3.710 | 1.352  | 0.678  | 1.488  | -1.124 | 0.724  | -1.086 | -0.686 | -1.367 | 72119  | TPX2         | NM_028109_2_+1  |
| Dennd2d       | 2.793  | 4.255  | 5.130  | 5.537  | -0.374 | 2.779  | 3.066  | 4.724  | 3.715  | 5.701  | 72121  | DENND2D      | NM_028110_3_+1  |
| Seh1l         | 3.511  | 4.322  | 3.699  | 3.988  | 3.000  | 2.940  | 2.208  | 3.273  | 3.207  | 3.250  | 72124  | SEH1L        | NM_028112_18_+1 |
| Trub1         | 3.255  | 3.148  | 1.966  | 2.708  | 2.303  | 2.875  | 1.958  | 2.302  | 0.436  | 0.386  | 72133  | TRUB1        | NM_028115_19_+1 |
| Chst14        | 3.380  | 4.108  | 2.380  | 2.128  | 1.852  | 1.817  | 1.889  | 2.249  | 3.087  | 3.150  | 72136  | CHST14       | NM_028117_2_+1  |
| Wdsub1        | 2.775  | 3.807  | 4.018  | 4.546  | 2.974  | 4.013  | 2.931  | 4.295  | 3.938  | 4.171  | 72137  | WDSUB1       | NM_028118_2_-1  |
| Ddb2          | 2.916  | 2.588  | 3.641  | 3.627  | 4.439  | 4.369  | 3.283  | 3.455  | 2.248  | 2.278  | 107986 | DDB2         | NM_028119_2_-1  |
| Cep89         | 2.237  | 2.525  | 2.014  | 1.926  | 2.384  | 1.999  | 1.901  | 1.409  | 1.337  | 0.880  | 72140  | CEP89        | NM_028120_7_+1  |
| Adpgk         | 6.029  | 5.085  | 5.136  | 4.973  | 3.857  | 4.037  | 4.032  | 4.083  | 5.167  | 4.366  | 72141  | ADPGK        | NM_028121_9_+1  |
| Slc14a1       | -3.585 | 0.494  | -1.537 | 2.139  | 2.098  | 1.950  | -0.369 | 2.508  | 0.373  | -0.865 | 108052 | SLC14A1      | NM_028122_18_-1 |

|               |        |        |        |        |        |        |        |        |        |        |        |          |                 |
|---------------|--------|--------|--------|--------|--------|--------|--------|--------|--------|--------|--------|----------|-----------------|
| Slc37a3       | 1.086  | 0.880  | 4.001  | 3.622  | 3.180  | 3.770  | 3.481  | 3.708  | 4.372  | 4.373  | 72144  | SLC37A3  | NM_028123_6_-1  |
| Zbtb46        | -0.146 | -2.349 | 6.853  | 6.566  | 6.839  | 6.729  | 5.997  | 5.348  | 1.224  | 0.057  | 72147  | ZBTB46   | NM_028125_2_-1  |
| Strada        | 4.386  | 4.181  | 5.137  | 5.036  | 5.520  | 5.336  | 5.211  | 4.746  | 4.889  | 4.358  | 72149  | STRADA   | NM_028126_11_-1 |
| Frmd6         | 1.424  | 2.056  | 1.287  | 1.922  | 0.645  | 0.753  | 0.938  | 0.704  | 1.329  | 0.962  | 319710 | FRMD6    | NM_028127_12_+1 |
| Rfc5          | 5.803  | 5.785  | 4.747  | 4.751  | 5.466  | 5.102  | 5.123  | 5.002  | 4.149  | 3.503  | 72151  | RFC5     | NM_028128_5_-1  |
| 2610020H08Rik | 0.852  | 0.682  | 0.724  | 0.411  | 1.174  | 0.762  | 0.693  | 0.773  | 0.583  | 0.784  | 434234 | LOC81691 | NM_028129_7_+1  |
| Zfp157        | 3.235  | 3.818  | 4.761  | 4.296  | 3.460  | 3.492  | 3.456  | 3.695  | 3.377  | 3.700  | 72154  | ZNF613   | NM_028130_5_+1  |
| Cenpn         | 0.505  | 1.073  | 2.570  | 2.803  | 3.057  | 2.733  | 2.531  | 2.299  | 0.980  | 0.455  | 72155  | CENPN    | NM_028131_8_+1  |
| Pgm2          | 5.069  | 4.466  | 5.346  | 5.167  | 5.076  | 4.901  | 4.924  | 4.346  | 4.826  | 4.221  | 72157  | PGM1     | NM_028132_4_+1  |
| Egln3         | 2.078  | 2.368  | -3.072 | -3.620 | -3.118 | -4.562 | 0.156  | -0.875 | 0.921  | 0.222  | 112407 | EGLN3    | NM_028133_12_-1 |
| Tmem163       | 6.603  | 6.774  | -1.523 | -1.016 | 0.689  | 1.645  | -1.158 | 1.425  | -3.189 | -1.481 | 72160  | TMEM163  | NM_028135_1_-1  |
| Dhx36         | 5.639  | 5.638  | 5.683  | 5.829  | 5.928  | 6.164  | 5.734  | 5.676  | 5.680  | 5.757  | 72162  | DHX36    | NM_028136_3_-1  |
| Msantd3       | -4.277 | -4.981 | -3.248 | -1.583 | -4.421 | -4.357 | -1.297 | -0.808 | 3.201  | 2.901  | 66665  | MSANTD3  | NM_028137_4_+1  |
| Thumpd2       | 3.295  | 3.647  | 1.940  | 2.319  | 3.259  | 3.230  | 2.869  | 2.815  | 2.745  | 2.705  | 72167  | THUMPD2  | NM_028138_17_-1 |
| Atxn7l1       | 4.380  | 4.274  | 3.928  | 3.968  | 5.038  | 4.972  | 4.984  | 4.299  | 3.859  | 4.286  | 380753 | ATXN7L1  | NM_028139_12_+1 |
| Mfsd8         | 4.210  | 4.708  | 3.585  | 3.509  | 3.504  | 3.652  | 3.777  | 3.676  | 3.933  | 4.068  | 72175  | MFSD8    | NM_028140_3_-1  |
| Zfp661        | -4.338 | -1.109 | -1.984 | 0.236  | -3.122 | -1.206 | -2.403 | 0.239  | -0.293 | -0.507 | 72180  | ZNF2     | NM_028141_2_-1  |
| Nsun4         | 4.647  | 4.686  | 3.810  | 3.853  | 4.189  | 4.177  | 4.056  | 4.082  | 4.210  | 3.942  | 72181  | NSUN4    | NM_028142_4_-1  |
| Klhl35        | 0.975  | 0.620  | -0.284 | -2.162 | -1.942 | -2.018 | -0.008 | -1.827 | 0.078  | -0.979 | 72184  | KLHL35   | NM_028145_7_+1  |
| Dbndd1        | -4.513 | 0.871  | -4.884 | -4.758 | -4.960 | -4.901 | -4.965 | -4.977 | -4.981 | -4.938 | 72185  | DBNDD1   | NM_028146_8_-1  |
| Scaf11        | 6.147  | 6.152  | 5.953  | 5.891  | 6.317  | 6.306  | 6.236  | 6.330  | 6.289  | 6.098  | 72193  | SCAF11   | NM_028148_15_-1 |
| Fbxl20        | 4.419  | 4.337  | 4.349  | 4.345  | 4.931  | 4.998  | 5.068  | 4.939  | 5.120  | 5.491  | 72194  | FBXL20   | NM_028149_11_-1 |
| Supt7l        | 3.612  | 3.170  | 3.686  | 3.812  | 3.850  | 3.700  | 3.687  | 3.749  | 4.082  | 3.771  | 72195  | SUPT7L   | NM_028150_5_-1  |
| Skiv2l2       | 5.115  | 5.216  | 5.387  | 5.191  | 5.605  | 5.443  | 5.460  | 5.399  | 5.647  | 5.601  | 72198  | SKIV2L2  | NM_028151_13_-1 |
| Mms19         | 4.433  | 4.429  | 4.784  | 4.695  | 4.629  | 4.626  | 4.852  | 4.570  | 5.073  | 4.910  | 72199  | MMS19    | NM_028152_19_-1 |
| Eml2          | -4.309 | -4.431 | -3.570 | -4.905 | -2.724 | -3.409 | -3.610 | -4.036 | -4.717 | -4.904 | 72205  | EML2     | NM_028153_7_+1  |
| 1700001P01Rik | -4.981 | -4.981 | -4.105 | -3.497 | -4.723 | -4.517 | -4.813 | -3.898 | -4.981 | -3.527 | 72215  | C17orf98 | NM_028156_11_-1 |
| Tbc1d5        | 4.512  | 4.388  | 5.435  | 5.457  | 5.630  | 5.546  | 5.243  | 4.990  | 5.519  | 5.466  | 72238  | TBC1D5   | NM_028162_17_-1 |
| 1600014C23Rik | -4.981 | -4.981 | -4.953 | -4.333 | -3.771 | -4.979 | -4.508 | -4.235 | -3.022 | -4.316 | 72240  | NA       | NM_028164_17_-1 |
| 1600014C10Rik | 5.013  | 4.421  | 3.800  | 3.581  | 4.305  | 3.782  | 4.698  | 4.201  | 6.718  | 5.929  | 72244  | C19orf12 | NM_028166_7_+1  |
| Fam71e1       | -0.042 | -0.030 | -2.068 | -3.605 | -2.833 | -2.333 | -2.044 | -3.120 | -2.451 | -3.797 | 75538  | FAM71E1  | NM_028169_7_+1  |
| 1700030K09Rik | 2.781  | 2.988  | 2.178  | 2.318  | 2.731  | 2.763  | 2.373  | 2.754  | 2.437  | 2.556  | 72254  | C19orf44 | NM_028170_8_+1  |
| Tram1         | 9.185  | 9.116  | 8.091  | 7.962  | 7.506  | 7.568  | 7.848  | 8.165  | 8.747  | 9.029  | 72265  | TRAM1    | NM_028173_1_-1  |
| Lrrc8e        | -3.248 | -1.578 | -3.769 | -3.437 | -3.264 | -4.173 | -3.188 | -4.543 | -4.981 | -3.336 | 72267  | LRRC8E   | NM_028175_8_+1  |
| Ndufab1       | 6.696  | 6.575  | 5.967  | 6.087  | 5.824  | 5.869  | 6.037  | 5.921  | 4.657  | 4.734  | 70316  | NDUFAB1  | NM_028177_7_-1  |
| 2200002D01Rik | 1.386  | 0.955  | 2.556  | 2.091  | 2.020  | 1.599  | 1.614  | 0.078  | -3.738 | -4.227 | 72275  | NA       | NM_028179_7_-1  |
| Ccpg1         | 2.078  | 2.908  | 2.037  | 2.878  | 1.206  | 2.264  | 2.504  | 2.790  | 3.438  | 3.953  | 72278  | CCPG1    | NM_028181_9_+1  |
| Sh2d4a        | -3.563 | -2.126 | -2.972 | -0.370 | -0.427 | 0.837  | -0.832 | 0.530  | -2.450 | -2.015 | 72281  | SH2D4A   | NM_028182_8_+1  |
| 1810062G17Rik | 0.284  | 0.218  | -0.306 | -1.506 | -0.812 | -1.810 | -1.410 | -1.595 | -1.795 | -1.525 | 72282  | NA       | NM_028183_3_+1  |
| Oraov1        | 3.600  | 3.973  | 3.800  | 3.795  | 3.972  | 4.231  | 3.979  | 4.061  | 3.341  | 3.857  | 72284  | ORAOV1   | NM_028184_7_+1  |
| Lsm11         | 2.519  | 1.687  | 2.289  | 2.066  | 2.696  | 2.194  | 2.810  | 2.534  | 2.607  | 2.648  | 72290  | LSM11    | NM_028185_11_-1 |
| Nkd2          | -4.981 | -3.408 | -4.596 | -4.925 | -4.795 | -4.972 | -4.978 | -4.941 | -4.981 | -4.981 | 72293  | NKD2     | NM_028186_13_-1 |
| Rusc1         | -4.981 | -4.981 | -0.793 | -3.259 | -3.965 | -3.949 | -4.132 | -3.534 | -4.981 | -1.003 | 72296  | RUSC1    | NM_028188_3_-1  |
| B3gnt3        | -1.799 | -2.137 | -0.022 | -0.356 | -0.340 | -0.089 | 0.098  | -0.552 | 0.647  | 0.996  | 72297  | B3GNT3   | NM_028189_8_-1  |
| Luc7l         | 3.685  | 4.216  | 4.378  | 4.266  | 4.600  | 4.613  | 4.309  | 4.414  | 4.547  | 4.464  | 66978  | LUC7L    | NM_028190_17_+1 |
| Brf1          | 5.569  | 5.827  | 5.784  | 5.859  | 5.794  | 5.957  | 5.874  | 5.931  | 6.040  | 5.854  | 72308  | BRF1     | NM_028193_12_-1 |
| Fryl          | 6.039  | 6.311  | 6.474  | 6.263  | 6.624  | 6.854  | 5.755  | 5.513  | 4.902  | 5.116  | 72313  | FRYL     | NM_028194_5_-1  |
| Cyth4         | 8.148  | 8.308  | 7.252  | 7.238  | 7.767  | 7.591  | 7.694  | 7.796  | 8.273  | 8.365  | 72318  | CYTH4    | NM_028195_15_+1 |
| Kif1bp        | 4.925  | 5.380  | 4.773  | 4.983  | 4.812  | 5.129  | 4.537  | 4.758  | 5.047  | 4.961  | 72320  | KIF1BP   | NM_028197_10_-1 |
| Xpo5          | 2.508  | 3.023  | 3.605  | 3.710  | 3.780  | 3.802  | 3.443  | 3.689  | 3.819  | 3.754  | 72322  | XPO5     | NM_028198_17_+1 |
| Plxdc1        | 6.148  | 6.360  | 4.581  | 4.549  | 4.040  | 4.118  | 4.008  | 4.193  | 5.163  | 4.975  | 72324  | PLXDC1   | NM_028199_11_-1 |
| Vps9d1        | 3.380  | 3.698  | 5.910  | 5.641  | 4.402  | 4.280  | 4.986  | 5.037  | 5.776  | 5.664  | 72325  | VPS9D1   | NM_028200_8_-1  |
| Slx4ip        | -1.208 | -0.974 | -0.169 | -0.293 | -0.044 | 0.149  | -0.610 | -1.077 | -1.264 | -3.040 | 74243  | SLX4IP   | NM_028201_2_+1  |
| Wdr89         | 2.680  | 1.678  | 2.006  | 1.265  | 1.938  | 2.052  | 1.064  | 1.057  | 0.227  | 0.997  | 72338  | WDR89    | NM_028203_12_-1 |
| Dusp3         | 1.166  | 0.552  | 3.483  | 3.370  | 2.130  | 1.462  | 4.416  | 4.278  | 5.937  | 5.591  | 72349  | DUSP3    | NM_028207_11_-1 |
| Ptar1         | 4.150  | 4.198  | 2.177  | 2.645  | 2.897  | 3.013  | 2.400  | 2.354  | 1.925  | 2.068  | 72351  | PTAR1    | NM_028208_19_+1 |
| Ttc4          | 4.934  | 5.197  | 4.684  | 4.615  | 4.867  | 5.036  | 4.754  | 4.877  | 4.517  | 4.426  | 72354  | TTC4     | NM_028209_4_-1  |
| 2210016L21Rik | 5.256  | 4.947  | 4.185  | 4.086  | 4.623  | 4.736  | 4.347  | 4.062  | 3.680  | 3.622  | 72357  | C12orf43 | NM_028211_5_+1  |
| Pzca          | -2.842 | -4.981 | -1.212 | -0.196 | -4.951 | -3.841 | -4.970 | -4.351 | -4.981 | -4.981 | 72373  | PSCA     | NM_028216_15_+1 |
| Fam192a       | 6.246  | 6.318  | 6.000  | 6.051  | 6.039  | 6.047  | 5.926  | 5.969  | 5.666  | 5.711  | 102122 | FAM192A  | NM_028221_8_-1  |
| Cdkn3         | -0.799 | -1.594 | 3.117  | 3.090  | 2.778  | 2.054  | 2.414  | 1.408  | 1.100  | -0.017 | 72391  | CDKN3    | NM_028222_14_+1 |
| Tmem175       | 1.634  | 1.117  | 1.665  | 1.280  | 2.491  | 2.051  | 1.227  | 1.843  | 2.023  | 1.858  | 72392  | TMEM175  | NM_028223_5_+1  |
| Rbm12b1       | 2.839  | 2.161  | 2.439  | 2.076  | 2.191  | 2.488  | 2.084  | 1.900  | 2.128  | 2.609  | 72397  | RBM12B   | NM_028226_4_+1  |
| Brap          | 4.329  | 4.442  | 4.646  | 4.604  | 4.804  | 4.697  | 4.718  | 4.953  | 5.307  | 5.357  | 72399  | BRAP     | NM_028227_5_+1  |
| Pinx1         | 4.125  | 4.060  | 4.298  | 4.014  | 4.222  | 4.164  | 4.202  | 3.681  | 3.252  | 2.729  | 72400  | PINX1    | NM_028228_14_+1 |
| Shmt2         | 4.730  | 4.710  | 4.633  | 4.773  | 4.637  | 4.959  | 3.919  | 4.599  | 2.778  | 3.329  | 108037 | SHMT2    | NM_028230_10_-1 |
| Sgol1         | -0.451 | -0.566 | 2.200  | 1.890  | 2.878  | 2.190  | 2.246  | 1.915  | 0.487  | 0.015  | 72415  | SGO1     | NM_028232_17_-1 |
| Lrpprc        | 3.383  | 3.336  | 4.261  | 4.189  | 4.248  | 4.153  | 4.053  | 4.452  | 4.689  | 4.784  | 72416  | LRPPRC   | NM_028233_17_-1 |
| Rbm33         | 5.505  | 5.384  | 5.293  | 5.124  | 5.699  | 5.542  | 5.471  | 5.342  | 5.653  | 5.643  | 381626 | NA       | NM_028234_5_+1  |
| Ttc30b        | 2.077  | 1.644  | 0.486  | 0.128  | 0.127  | 0.189  | -0.511 | -0.634 | 1.972  | 1.010  | 72421  | TTC30B   | NM_028235_2_-1  |
| Ceacam18      | -4.981 | -4.981 | -3.627 | -4.615 | -0.709 | -0.986 | -1.121 | -1.752 | -1.239 | -0.522 | 72431  | CEACAM18 | NM_028236_7_+1  |
| Rab38         | 0.240  | -1.910 | 4.058  | 4.008  | 4.385  | 3.672  | 4.307  | 3.831  | 1.213  | 1.546  | 72433  | RAB38    | NM_028238_7_+1  |
| Htatsf1       | 5.511  | 5.120  | 4.927  | 4.956  | 4.674  | 4.940  | 4.841  | 4.869  | 4.728  | 4.652  | 72459  | HTATSF1  | NM_028242_X_+1  |
| Prpcp         | 6.424  | 5.774  | 6.054  | 5.438  | 6.058  | 5.610  | 6.316  | 5.478  | 5.705  | 5.447  | 72461  | PRCP     | NM_028243_7_+1  |

|               |          |        |        |        |        |        |        |        |        |        |        |        |          |                  |
|---------------|----------|--------|--------|--------|--------|--------|--------|--------|--------|--------|--------|--------|----------|------------------|
|               | Rrp1b    | 3.589  | 3.449  | 3.764  | 3.738  | 4.045  | 3.919  | 3.671  | 4.039  | 4.571  | 4.145  | 72462  | RRP1B    | NM_028244_17_+_1 |
|               | Zfp131   | 3.481  | 2.161  | 2.691  | 2.932  | 2.336  | 1.855  | 3.212  | 2.447  | 3.260  | 3.535  | 72465  | ZNF131   | NM_028245_13_-_1 |
|               | Slc16a10 | -0.435 | 0.317  | -2.125 | -1.614 | -1.525 | -1.500 | -0.098 | -0.173 | 1.057  | 1.230  | 72472  | SLC16A10 | NM_028247_10_-_1 |
|               | Tmem87b  | 4.121  | 4.379  | 4.970  | 4.488  | 4.016  | 3.807  | 4.144  | 3.995  | 4.470  | 4.725  | 72477  | TMEM87B  | NM_028248_2_+_1  |
|               | Acbd6    | 3.943  | 3.955  | 3.961  | 4.094  | 3.582  | 3.376  | 3.540  | 3.135  | 3.026  | 2.728  | 72482  | ACBD6    | NM_028250_1_+_1  |
|               | Rps6kb1  | 2.080  | 1.773  | 1.673  | 1.636  | 1.916  | 1.842  | 1.399  | 0.808  | 1.284  | 1.576  | 72508  | RPS6KB1  | NM_028259_11_-_1 |
|               | Immp1l   | 6.431  | 6.627  | 6.294  | 6.164  | 5.984  | 6.114  | 5.598  | 5.558  | 3.681  | 4.292  | 66541  | IMMP1L   | NM_028260_2_+_1  |
|               | Tmem173  | 8.128  | 8.313  | 6.225  | 5.805  | 7.568  | 7.532  | 7.306  | 7.013  | 6.615  | 6.617  | 72512  | TMEM173  | NM_028261_18_-_1 |
|               | Setd3    | 6.265  | 5.940  | 6.092  | 5.837  | 5.770  | 5.336  | 5.739  | 5.316  | 6.403  | 5.713  | 52690  | SETD3    | NM_028262_12_-_1 |
|               | Fgfbp3   | 1.331  | 1.121  | 2.733  | 1.569  | 0.006  | -1.110 | -0.357 | -0.877 | -2.539 | -2.255 | 72514  | FGFBP3   | NM_028263_19_-_1 |
|               | Tmem55a  | 4.694  | 5.412  | 3.785  | 4.147  | 2.646  | 2.548  | 3.912  | 4.060  | 4.687  | 5.099  | 72519  | TMEM55A  | NM_028264_4_+_1  |
|               | Col16a1  | -4.981 | -1.541 | -4.981 | -4.981 | -4.332 | -4.884 | -4.981 | -4.981 | -4.981 | -4.981 | 107581 | COL16A1  | NM_028266_4_+_1  |
|               | Aldh1b1  | 5.567  | 5.416  | 4.089  | 4.073  | 4.150  | 3.908  | 4.438  | 4.456  | 5.755  | 4.893  | 72535  | ALDH1B1  | NM_028270_4_+_1  |
|               | Pgam5    | 4.289  | 5.081  | 4.445  | 4.304  | 4.271  | 4.412  | 4.235  | 4.289  | 3.767  | 4.104  | 72542  | PGAM5    | NM_028273_5_-_1  |
|               | Exosc6   | 4.407  | 4.446  | 4.689  | 4.753  | 4.622  | 4.465  | 4.701  | 4.435  | 4.071  | 3.644  | 72544  | EXOSC6   | NM_028274_8_+_1  |
| 1700112E06Rik |          | 0.463  | 0.393  | 0.340  | 1.618  | 1.061  | 1.990  | 2.481  | 2.200  | 3.219  | 3.112  | 76633  | C10orf11 | NM_028275_14_+_1 |
|               | Utp14a   | 4.651  | 4.294  | 4.177  | 4.548  | 4.434  | 4.625  | 4.444  | 4.426  | 4.490  | 4.462  | 72554  | UTP14A   | NM_028276_X_+_1  |
|               | Shisa9   | -4.981 | -4.981 | -4.254 | -3.813 | -4.929 | -4.674 | -4.777 | -4.710 | -4.981 | -4.599 | 72555  | SHISA9   | NM_028277_16_+_1 |
|               | Naalad2  | -4.981 | -4.981 | 2.377  | 3.734  | -4.681 | -4.151 | -2.757 | -2.673 | -4.981 | -2.713 | 72560  | NAALAD2  | NM_028279_9_-_1  |
|               | Pcbd2    | 5.133  | 5.098  | 5.483  | 5.456  | 5.259  | 5.260  | 5.467  | 5.004  | 3.923  | 3.947  | 72562  | PCBD2    | NM_028281_13_+_1 |
|               | Uaca     | -1.381 | -0.809 | -4.038 | -1.230 | -4.905 | -4.894 | -4.595 | -4.950 | -4.981 | -4.981 | 72565  | UACA     | NM_028283_9_+_1  |
|               | Bbs5     | 3.421  | 3.100  | 1.567  | 0.918  | 0.268  | 0.335  | -0.263 | 0.217  | 0.824  | 1.084  | 72569  | BBS5     | NM_028284_2_+_1  |
|               | Zufsp    | 5.668  | 5.840  | 5.476  | 5.398  | 5.608  | 5.392  | 5.262  | 5.073  | 5.237  | 5.092  | 72580  | ZUFSP    | NM_028287_10_-_1 |
|               | Cul4b    | 4.094  | 3.868  | 4.305  | 4.371  | 3.991  | 3.829  | 4.141  | 4.059  | 4.584  | 4.842  | 72584  | CUL4B    | NM_028288_X_-_1  |
|               | Pan3     | 4.936  | 5.821  | 5.310  | 5.629  | 5.235  | 5.937  | 5.164  | 5.673  | 4.910  | 5.814  | 72587  | PAN3     | NM_028291_5_+_1  |
|               | Ppme1    | 2.500  | 2.415  | 4.051  | 3.930  | 2.743  | 2.776  | 2.660  | 2.806  | 3.949  | 3.954  | 72590  | PPME1    | NM_028292_7_-_1  |
|               | Cep55    | -0.560 | -0.672 | 2.060  | 3.161  | 2.806  | 2.566  | 2.366  | 1.164  | -0.520 | 0.272  | 74107  | CEP55    | NM_028293_19_+_1 |
|               | Pdia5    | 6.012  | 5.754  | 8.068  | 7.810  | 0.425  | -0.580 | 1.905  | 4.348  | 1.653  | 2.722  | 72599  | PDIA5    | NM_028295_16_-_1 |
|               | Zfp655   | 4.470  | 4.625  | 5.471  | 5.357  | 4.500  | 4.562  | 4.528  | 4.708  | 4.860  | 5.232  | 72611  | ZNF655   | NM_028298_5_+_1  |
|               | Hpf1     | 6.698  | 6.916  | 5.174  | 5.480  | 5.720  | 5.881  | 5.486  | 5.490  | 4.008  | 4.441  | 72612  | HPF1     | NM_028299_8_+_1  |
|               | Pih1d2   | -0.602 | 0.560  | -1.679 | 0.012  | -2.237 | -1.993 | -2.017 | -2.039 | -2.760 | -1.177 | 72614  | PIH1D2   | NM_028300_9_+_1  |
|               | Anks3    | 5.545  | 5.366  | 4.443  | 4.441  | 4.734  | 4.761  | 4.401  | 4.129  | 4.038  | 3.909  | 72615  | ANKS3    | NM_028301_16_-_1 |
|               | Pdzd11   | 6.427  | 6.298  | 5.266  | 5.262  | 5.279  | 5.201  | 4.987  | 5.043  | 4.231  | 4.202  | 72621  | PDZD11   | NM_028303_X_-_1  |
|               | Pus10    | 2.612  | 3.001  | 4.037  | 4.051  | 4.044  | 3.407  | 3.612  | 3.193  | 3.836  | 3.653  | 74467  | PUS10    | NM_028304_11_+_1 |
|               | Hspa12b  | -4.981 | -4.981 | -4.062 | -4.827 | -4.983 | -4.983 | -4.352 | -4.915 | -4.394 | -4.342 | 72630  | HSPA12B  | NM_028306_2_+_1  |
|               | Tdrkh    | 3.969  | 4.238  | 1.461  | 1.783  | 1.290  | 1.649  | 1.018  | 1.441  | -0.400 | -0.487 | 72634  | TDRKH    | NM_028307_3_+_1  |
|               | Mob2     | 5.877  | 5.769  | 5.208  | 5.211  | 5.407  | 5.270  | 5.412  | 5.368  | 5.390  | 5.122  | 101513 | MOB2     | NM_028308_7_-_1  |
| 281006K23Rik  |          | -1.189 | -0.065 | -3.010 | -1.791 | -1.711 | -1.454 | -2.205 | -4.038 | -2.229 | -2.233 | 72650  | C12orf65 | NM_028310_5_+_1  |
|               | Ccdc12   | 7.831  | 7.873  | 8.073  | 8.020  | 7.841  | 7.734  | 7.889  | 7.637  | 7.330  | 7.125  | 72654  | CCDC12   | NM_028312_9_+_1  |
| 2700097O09Rik |          | 2.784  | 2.562  | 3.681  | 3.589  | 2.764  | 2.728  | 1.882  | 1.928  | 0.100  | 0.933  | 72658  | NA       | NM_028314_12_-_1 |
|               | Dis3     | 3.687  | 3.889  | 4.086  | 4.063  | 3.867  | 3.867  | 3.635  | 3.616  | 2.997  | 3.146  | 72662  | DIS3     | NM_028315_14_-_1 |
|               | Zfp444   | 3.119  | 3.082  | 2.394  | 2.518  | 2.277  | 2.036  | 2.489  | 2.248  | 2.915  | 2.007  | 72667  | ZNF444   | NM_028316_7_+_1  |
|               | Zfp518a  | 4.603  | 4.168  | 4.262  | 4.173  | 3.872  | 3.926  | 3.737  | 3.870  | 3.768  | 4.413  | 72672  | ZNF518A  | NM_028319_19_+_1 |
|               | Adipor1  | 6.067  | 5.953  | 6.965  | 6.992  | 6.658  | 6.579  | 7.081  | 7.255  | 8.173  | 8.110  | 72674  | ADIPOR1  | NM_028320_1_+_1  |
|               | Zfp618   | 0.371  | 1.417  | -0.949 | 1.217  | -2.580 | 1.105  | -3.147 | -1.537 | -4.981 | -4.981 | 72701  | ZNF618   | NM_028326_4_+_1  |
|               | C1qtnf6  | -4.981 | -4.751 | -3.819 | -3.554 | -4.198 | -4.784 | -2.919 | -1.480 | -2.336 | 3.151  | 72709  | C1QTNF6  | NM_028331_15_-_1 |
|               | Angptl1  | -0.664 | -1.729 | -3.835 | -2.970 | -3.395 | -3.634 | -3.465 | -2.042 | -2.871 | -4.981 | 72713  | ANGPTL1  | NM_028333_1_+_1  |
|               | Nup37    | -0.220 | 0.936  | 0.711  | 2.373  | 0.180  | 0.640  | -0.327 | -0.171 | -0.377 | -4.848 | 69736  | NUP37    | NM_028334_10_+_1 |
|               | Zfp248   | 0.698  | 0.472  | -3.219 | -1.071 | -0.788 | -0.354 | -0.246 | -1.417 | -1.239 | -0.465 | 72720  | ZNF248   | NM_028335_6_-_1  |
|               | Tmem107  | -2.354 | -1.971 | -2.053 | -4.913 | -4.054 | -4.974 | -4.265 | -3.548 | -3.521 | -2.937 | 66910  | TMEM107  | NM_028336_11_+_1 |
|               | Tmx1     | 6.906  | 7.410  | 6.477  | 6.369  | 6.275  | 6.250  | 6.483  | 6.527  | 6.212  | 6.774  | 72736  | TMX1     | NM_028339_12_+_1 |
|               | Susd3    | -4.923 | -0.527 | -2.339 | -3.047 | -2.045 | -1.640 | -2.261 | -1.614 | -0.853 | -0.683 | 66329  | SUSD3    | NM_028340_13_-_1 |
|               | Ttc39c   | -3.563 | -2.895 | 2.233  | 2.067  | -1.704 | -2.026 | 1.568  | 1.840  | 4.427  | 4.206  | 72747  | TTC39C   | NM_028341_18_+_1 |
|               | Tmem135  | 4.762  | 4.818  | 5.443  | 5.393  | 5.139  | 5.266  | 5.355  | 5.576  | 5.657  | 5.894  | 72759  | TMEM135  | NM_028343_7_-_1  |
|               | Neil1    | 3.354  | 3.527  | 2.332  | 2.716  | 2.255  | 2.717  | 1.958  | 2.655  | 2.744  | 2.688  | 72774  | NEIL1    | NM_028347_9_-_1  |
|               | Sass6    | 2.060  | 2.355  | 3.896  | 3.895  | 3.553  | 3.162  | 2.970  | 3.076  | 3.486  | 3.757  | 72776  | SASS6    | NM_028349_3_+_1  |
|               | Pgm3     | 5.050  | 5.482  | 4.143  | 4.615  | 4.314  | 4.747  | 4.097  | 4.387  | 4.303  | 4.310  | 109785 | PGM3     | NM_028352_9_-_1  |
|               | Tdp1     | 3.679  | 4.034  | 3.546  | 3.841  | 4.106  | 4.165  | 4.007  | 3.912  | 3.476  | 3.462  | 104884 | TDP1     | NM_028354_12_+_1 |
|               | Ndc1     | 1.658  | 1.608  | 1.947  | 2.591  | 2.503  | 2.480  | 2.343  | 2.688  | 2.236  | 2.109  | 72787  | NDC1     | NM_028355_4_+_1  |
|               | Zbtb25   | 4.523  | 4.203  | 3.380  | 3.143  | 3.896  | 3.497  | 3.636  | 3.258  | 3.001  | 2.665  | 109929 | ZBTB25   | NM_028356_12_-_1 |
|               | Ssbp1    | 3.899  | 3.885  | 2.181  | 1.713  | 2.474  | 2.006  | 2.188  | 1.822  | 2.121  | 1.010  | 381760 | SSBP1    | NM_028358_6_+_1  |
|               | Ttc19    | 4.512  | 4.678  | 3.885  | 3.703  | 3.096  | 3.407  | 2.735  | 3.121  | 2.426  | 3.227  | 72795  | TTC19    | NM_028360_11_+_1 |
|               | Puf60    | 5.869  | 5.732  | 5.763  | 5.698  | 5.894  | 5.720  | 5.486  | 5.401  | 5.758  | 4.918  | 67959  | PUF60    | NM_028364_15_-_1 |
|               | Zfp839   | 2.580  | 3.057  | 3.488  | 2.864  | 2.599  | 3.520  | 1.264  | 2.290  | 3.734  | 3.450  | 72805  | ZNF839   | NM_028365_12_+_1 |
|               | Mon1a    | 3.991  | 4.031  | 3.628  | 3.584  | 3.792  | 3.119  | 3.564  | 3.486  | 4.402  | 4.208  | 72825  | MON1A    | NM_028369_9_+_1  |
|               | Pot1b    | 1.679  | 2.538  | 4.376  | 3.245  | 4.090  | 3.131  | 5.153  | 4.683  | 4.401  | 4.737  | 72836  | NA       | NM_028370_17_-_1 |
|               | Mblac2   | 4.297  | 4.287  | 3.525  | 3.193  | 3.166  | 3.527  | 3.265  | 2.976  | 2.782  | 3.208  | 72852  | MBLAC2   | NM_028372_13_+_1 |
|               | Cxx1c    | 5.255  | 5.259  | 7.333  | 7.716  | 5.953  | 6.431  | 4.896  | 5.738  | 0.061  | 1.026  | 72865  | FAM127A  | NM_028375_X_+_1  |
|               | Pfn4     | -0.779 | -2.239 | -4.550 | -2.876 | -2.049 | -1.339 | -2.029 | -2.409 | -1.372 | -2.593 | 382562 | PFN4     | NM_028376_12_+_1 |
|               | Bbof1    | -2.686 | -2.895 | -3.916 | -3.993 | -2.911 | -3.624 | -4.476 | -3.273 | -3.088 | -4.316 | 72873  | BBOF1    | NM_028377_12_+_1 |
|               | Zdhhc4   | 6.023  | 5.809  | 5.162  | 5.214  | 5.249  | 5.186  | 5.218  | 5.098  | 5.201  | 4.623  | 72881  | ZDHHC4   | NM_028379_5_-_1  |
|               | Ccdc94   | 3.322  | 3.371  | 3.064  | 3.396  | 3.426  | 3.337  | 3.062  | 2.866  | 3.229  | 2.854  | 72886  | CCDC94   | NM_028381_17_+_1 |
|               | Setd5    | 3.872  | 3.635  | 4.642  | 4.723  | 4.518  | 4.521  | 4.186  | 4.290  | 4.413  | 4.447  | 72895  | SETD5    | NM_028385_6_+_1  |
|               | Asphd2   | -4.981 | -4.981 | -4.483 | -4.911 | -3.766 | -3.116 | -4.961 | -4.971 | -4.981 | -4.981 | 72898  | ASPHD2   | NM_028386_5_-_1  |

|               |        |        |        |        |        |        |        |        |        |        |        |                    |                      |
|---------------|--------|--------|--------|--------|--------|--------|--------|--------|--------|--------|--------|--------------------|----------------------|
| Macro2        | 1.864  | 1.906  | 0.409  | -0.182 | 0.000  | -0.033 | -0.290 | -0.815 | -2.202 | -1.019 | 72899  | MACROD2            | NM_028387_2_+1       |
| Ndufv2        | 8.317  | 8.280  | 7.866  | 7.889  | 7.857  | 7.797  | 7.841  | 7.689  | 6.675  | 6.665  | 72900  | NDUFV2             | NM_028388_17_-1      |
| Tmem219       | 6.228  | 6.228  | 4.967  | 5.097  | 4.848  | 4.771  | 5.009  | 4.919  | 4.569  | 4.756  | 68742  | TMEM219            | NM_028389_7_-1       |
| Anln          | -0.549 | 0.321  | 1.050  | 1.400  | 2.838  | 2.134  | 2.323  | 1.900  | 2.077  | 2.284  | 68743  | ANLN               | NM_028390_9_-1       |
| Hspb11        | 3.453  | 3.567  | 3.360  | 3.178  | 3.026  | 2.844  | 3.451  | 3.095  | 2.032  | 2.544  | 72938  | HSPB11             | NM_028394_4_+1       |
| Phykpl        | 3.902  | 4.588  | 3.604  | 3.506  | 3.180  | 3.111  | 3.078  | 3.505  | 3.551  | 3.201  | 72947  | PHYKPL             | NM_028398_11_+1      |
| Ccnt2         | 5.144  | 5.473  | 5.984  | 5.617  | 6.079  | 6.142  | 5.638  | 5.429  | 5.145  | 5.268  | 72949  | CCNT2              | NM_028399_1_+1       |
| Zfp493        | 0.419  | -0.879 | 0.907  | -0.707 | 0.020  | -0.073 | 0.147  | -0.851 | -0.369 | 0.141  | 72958  | NA                 | NM_028402_13_+1      |
| Top1mt        | 4.411  | 4.524  | 2.182  | 2.491  | 2.070  | 2.500  | 2.135  | 2.449  | 1.441  | 1.534  | 72960  | TOP1MT             | NM_028404_15_-1      |
| Ccser2        | -0.378 | -0.111 | -0.498 | -0.596 | -0.962 | -1.149 | -1.500 | -0.883 | -0.039 | 1.029  | 72972  | CCSER2             | NM_028407_14_-1      |
| Cnih3         | -4.747 | -4.662 | -4.980 | -4.980 | -4.981 | -4.981 | -4.980 | -4.966 | -4.981 | -4.981 | 72978  | CNIH3              | NM_028408_1_+1       |
| Prkrir        | 4.284  | 4.234  | 4.801  | 4.797  | 4.227  | 4.297  | 4.347  | 4.396  | 4.390  | 4.152  | 72981  | THAP12             | NM_028410_7_+1       |
| Tmem138       | 4.820  | 4.951  | 3.382  | 3.044  | 3.704  | 3.592  | 3.313  | 3.081  | 2.263  | 2.149  | 72982  | TMEM138            | NM_028411_19_-1      |
| Ciz1          | 4.000  | 3.745  | 3.948  | 4.069  | 3.851  | 3.841  | 4.002  | 3.777  | 4.554  | 4.601  | 68379  | CIZ1               | NM_028412_2_+1       |
| Kremen2       | -3.563 | -3.315 | 2.387  | 2.006  | 1.000  | 1.001  | -0.763 | -1.307 | -4.981 | -4.227 | 73016  | KREMEN2            | NM_028416_17_-1      |
| Glrx5         | 6.578  | 6.688  | 5.920  | 6.481  | 6.046  | 6.856  | 6.008  | 6.579  | 5.377  | 5.273  | 73046  | GLRX5              | NM_028419_12_+1      |
| Camk2n2       | -3.189 | -4.981 | -3.082 | -3.289 | -3.362 | -4.671 | -2.835 | -3.940 | -3.109 | -2.594 | 73047  | CAMK2N2            | NM_028420_16_-1      |
| Zc3hav1       | 0.501  | 0.897  | 1.502  | 1.774  | 1.798  | 1.698  | 1.977  | 1.863  | 3.440  | 2.874  | 78781  | ZC3HAV1            | NM_028421_6_-1       |
| Mtg2          | 1.166  | 1.480  | -0.212 | 0.546  | 1.267  | 0.895  | 0.520  | 0.752  | 1.227  | 0.273  | 52856  | MTG2               | NM_028422_2_+1       |
| Cldn34c1      | 0.003  | -0.704 | -1.800 | -2.853 | -3.519 | -4.142 | -3.474 | -3.333 | -3.823 | -4.342 | 73061  | NA                 | NM_028426_X_+1       |
| Tmem192       | 7.205  | 7.219  | 5.395  | 5.436  | 5.546  | 5.548  | 5.635  | 5.626  | 5.572  | 5.194  | 73067  | TMEM192            | NM_028427_8_+1       |
| Fut11         | 4.921  | 4.887  | 4.166  | 3.977  | 3.900  | 3.889  | 4.107  | 4.301  | 4.921  | 5.085  | 73068  | FUT11              | NM_028428_14_+1      |
| Ppil6         | -1.853 | -0.352 | -4.634 | -4.580 | -3.569 | -4.144 | -3.749 | -4.222 | -2.957 | -3.498 | 73075  | PPII6              | NM_028430_10_+1      |
| Pmpcb         | 5.966  | 6.042  | 5.760  | 6.074  | 5.430  | 5.545  | 5.123  | 5.379  | 4.767  | 4.845  | 73078  | PMPCB              | NM_028431_5_+1       |
| 3110009E18Rik | 2.592  | 2.689  | 1.537  | 1.656  | 1.559  | 2.134  | 2.298  | 2.258  | 1.931  | 2.010  | 73103  | C2orf76            | NM_028439_1_+1       |
| Abrac1        | 7.309  | 7.295  | 7.391  | 7.425  | 7.022  | 7.040  | 7.221  | 6.970  | 6.269  | 6.402  | 73112  | ABRACL             | NM_028440_10_-1      |
| Rflna         | -3.843 | -4.981 | -3.248 | -4.216 | -3.182 | -4.708 | -4.611 | -4.786 | -1.654 | -3.142 | 73121  | RFLNA ZNF664-FA NM | NM_028443_5_+1       |
| Prkcd8p       | -0.378 | -2.437 | -3.264 | -1.156 | -3.125 | -3.178 | -2.357 | -0.426 | -4.190 | -2.145 | 109042 | PRKCD8P            | NM_028444_7_-1       |
| Trip11        | 5.441  | 5.372  | 5.735  | 5.658  | 5.830  | 6.088  | 5.034  | 4.909  | 4.668  | 4.580  | 109181 | TRIP11             | NM_028446_12_-1      |
| Prrc1         | 4.609  | 4.285  | 4.934  | 5.272  | 4.584  | 4.380  | 4.622  | 5.175  | 5.658  | 5.630  | 73137  | PRRC1              | NM_028447_18_+1      |
| Cenpv         | -0.322 | -0.320 | 5.430  | 2.634  | 0.775  | 1.133  | 1.375  | 1.541  | 0.699  | 0.592  | 73139  | CENPV              | NM_028448_11_-1      |
| Gulp1         | -4.981 | -0.643 | -4.972 | -4.972 | -4.948 | -4.914 | -4.981 | -4.981 | -4.981 | -4.981 | 70676  | GULP1              | NM_028450_1_+1       |
| Larp1         | 5.804  | 5.194  | 6.346  | 6.168  | 6.197  | 6.004  | 6.316  | 6.104  | 6.753  | 6.156  | 73158  | LARP1              | NM_028451_11_+1      |
| Otud3         | 1.208  | 1.885  | 1.937  | 2.167  | 2.268  | 2.046  | 1.508  | 1.779  | 2.386  | 1.962  | 73162  | OTUD3              | NM_028453_4_-1       |
| Tm75f2        | 3.877  | 4.250  | 0.991  | 1.254  | 0.022  | 0.708  | 0.629  | 1.415  | 2.037  | 2.380  | 73166  | TM75F2             | NM_028454_19_-1      |
| Arhgap8       | -4.981 | -4.981 | -2.424 | -4.237 | -4.469 | -4.778 | -4.980 | -4.797 | -4.981 | -4.981 | 73167  | ARHGAP8 PRR5-AF NM | NM_028455_15_+1      |
| Rwdd3         | 1.562  | 2.894  | -0.274 | 1.445  | 0.769  | 1.881  | 0.477  | 1.552  | -0.305 | 0.440  | 66568  | RWDD3              | NM_028456_3_-1       |
| Exo5          | 4.054  | 4.029  | 3.247  | 3.658  | 2.370  | 2.806  | 2.440  | 3.103  | 3.260  | 3.375  | 73172  | EXO5               | NM_028457_4_-1       |
| Wasl          | 3.972  | 4.005  | 4.511  | 4.599  | 4.564  | 4.719  | 4.398  | 4.081  | 3.574  | 3.899  | 73178  | NA                 | NM_028459_6_-1       |
| Pear1         | -4.463 | -4.163 | -4.858 | -4.773 | -4.972 | -4.972 | -4.450 | -4.887 | -4.924 | -4.905 | 73182  | PEAR1              | NM_028460_3_-1       |
| Mocs1         | 2.353  | 2.336  | 1.872  | 2.590  | 2.261  | 2.110  | 3.261  | 3.737  | 5.920  | 5.918  | 56738  | NA                 | NM_028464_17_+1      |
| 3110082117Rik | 3.134  | 2.589  | 1.498  | 1.988  | 2.275  | 2.288  | 4.033  | 4.236  | 5.924  | 5.250  | 73212  | C7orf50            | NM_028469_5_-1       |
| Bmper         | -4.981 | -3.267 | -1.676 | -0.871 | 1.414  | 0.245  | -0.731 | -3.367 | -4.981 | -4.981 | 73230  | BMPER              | NM_028472_9_+1       |
| Ubp2l         | 0.375  | 0.445  | 1.542  | 1.355  | 0.760  | 1.740  | 1.659  | -0.544 | 1.318  | 1.185  | 74383  | NA                 | NM_028475_3_-1       |
| Atat1         | -0.296 | 0.375  | 0.743  | -0.447 | 1.156  | 0.751  | 0.101  | -0.069 | 0.521  | 0.124  | 73242  | ATAT1              | NM_028476_17_-1      |
| Rassf6        | -2.842 | -4.981 | -2.970 | -2.364 | 1.081  | 1.435  | -2.716 | -2.361 | -4.981 | -4.227 | 73246  | RASSF6             | NM_028478_5_-1       |
| Mrgbp         | 3.792  | 3.971  | 2.977  | 2.983  | 3.475  | 3.468  | 3.032  | 3.040  | 2.843  | 2.569  | 73247  | MRGBP              | NM_028479_2_+1       |
| Ccdc18        | 1.007  | 0.304  | -0.021 | 0.665  | 1.765  | 1.244  | 1.408  | -0.029 | -0.775 | -1.678 | 73254  | CCDC18             | NM_028481_5_+1       |
| 1700037C18Rik | 3.939  | 3.616  | 2.518  | 2.041  | 2.603  | 2.687  | 1.683  | 1.587  | 0.607  | 0.686  | 73261  | C16orf90           | NM_028484_16_-1      |
| Gpdp1         | 6.826  | 6.683  | 6.407  | 6.236  | 6.458  | 6.276  | 6.236  | 5.973  | 5.366  | 5.733  | 73274  | GPDP1              | NM_028487_13_-1      |
| 1700040L02Rik | 0.109  | 0.452  | -4.079 | -4.538 | -4.899 | -4.779 | -4.980 | -3.351 | -3.925 | -3.480 | 73287  | C10orf107          | NM_028491_10_-1      |
| Ccdc103       | -4.981 | -1.693 | -4.775 | -4.432 | -4.157 | -4.214 | -4.934 | -3.081 | -4.981 | -4.981 | 73293  | CCDC103            | NM_028492_11_+1      |
| Rhobtb3       | -3.349 | -4.981 | -4.556 | -2.543 | -4.125 | -3.082 | -4.974 | -3.562 | -2.871 | -1.289 | 73296  | RHOBTB3            | NM_028493_13_-1      |
| Calr3         | -1.002 | -0.806 | -1.662 | -1.696 | -1.776 | -1.867 | -1.657 | -2.886 | -4.981 | -2.349 | 73316  | CALR3              | NM_028500_8_-1       |
| Clhc1         | -3.900 | -3.882 | -4.671 | -4.720 | -4.421 | -4.923 | -4.760 | -4.831 | -3.717 | -4.981 | 73324  | CLHC1              | NM_028504_11_+1      |
| Pradc1        | -0.176 | 0.598  | -1.384 | -0.596 | -0.904 | -1.951 | -2.142 | -1.024 | -3.065 | -1.386 | 73327  | PRADC1             | NM_028505_6_-1       |
| Ccdc30        | -3.608 | -4.981 | -4.189 | -3.837 | -4.619 | -4.914 | -4.977 | -4.775 | -4.591 | -3.984 | 73332  | NA                 | NM_028506_4_-1       |
| 1700034J05Rik | -4.981 | -1.554 | -4.171 | -4.928 | -4.958 | -4.944 | -4.866 | -4.965 | -4.981 | -4.981 | 73344  | C12orf71           | NM_028509_6_-1       |
| 1700056E22Rik | 2.064  | 1.873  | 2.313  | 2.242  | 1.453  | 0.482  | 1.278  | 0.292  | 0.282  | -0.434 | 73363  | NA                 | NM_028516_1_-1       |
| Col20a1       | -0.017 | 2.848  | -0.450 | 1.406  | -1.564 | 1.287  | -1.429 | 0.809  | -0.941 | 1.406  | 73368  | COL20A1            | NM_028518_2_+1       |
| Phospho2      | 5.835  | 5.737  | 5.436  | 5.187  | 4.799  | 4.979  | 4.845  | 4.952  | 5.115  | 5.141  | 73373  | PHOSPHO2           | NM_028521_2_+1       |
| Dcbld2        | 0.248  | 1.101  | 0.225  | 0.550  | -0.864 | -0.200 | -2.190 | 0.233  | -3.491 | 0.397  | 73379  | DCBLD2             | NM_028523_16_+1      |
| Fam177a       | 4.815  | 4.025  | 5.603  | 4.700  | 5.486  | 4.215  | 5.323  | 3.850  | 4.164  | 3.347  | 73385  | NA                 | NM_028527_12_+1      |
| Fam177a       | 2.716  | 1.950  | 3.627  | 1.707  | 2.532  | 1.927  | 2.836  | 0.580  | 2.217  | 1.068  | 73385  | NA                 | NM_028527_dup1_12_+2 |
| Smap1         | 6.180  | 6.009  | 5.871  | 5.888  | 5.979  | 6.203  | 6.284  | 6.128  | 5.653  | 5.813  | 98366  | SMAP1              | NM_028534_1_-1       |
| Ccsap         | 0.497  | 0.916  | 1.605  | 1.634  | 2.273  | 1.691  | 1.974  | 1.961  | 1.103  | 0.222  | 73420  | CCSAP              | NM_028536_8_-1       |
| Zfp974        | 2.243  | 1.778  | 2.011  | 1.628  | 1.536  | 2.022  | 1.721  | 1.614  | 1.645  | 2.647  | 73430  | NA                 | NM_028538_7_-1       |
| Tex35         | -4.920 | -4.596 | -4.981 | -4.981 | -4.981 | -4.981 | -4.981 | -4.981 | -4.981 | -4.981 | 73435  | TEX35              | NM_028540_1_-1       |
| Wdr13         | 3.182  | 3.901  | 1.738  | 2.372  | 3.446  | 3.351  | 2.981  | 2.841  | 3.220  | 3.777  | 73447  | WDR13              | NM_028542_X_-1       |
| Zfp763        | 1.099  | 1.587  | -0.748 | -2.141 | 0.949  | 1.277  | 0.343  | 0.974  | 1.095  | 1.300  | 73451  | NA                 | NM_028543_17_-1      |
| Rasip1        | 0.774  | 1.227  | 2.474  | 2.162  | 1.854  | 2.384  | 0.898  | 0.693  | -1.685 | -1.509 | 69903  | RASIP1             | NM_028544_7_+1       |
| 1700066M21Rik | 2.056  | 2.173  | 3.774  | 3.488  | 2.461  | 1.868  | 3.329  | 3.023  | 3.712  | 3.917  | 73467  | C2orf69            | NM_028546_1_+1       |
| 1700094D03Rik | 2.011  | 2.649  | 2.320  | 1.562  | 2.477  | 2.276  | 2.218  | 2.223  | 2.047  | 1.876  | 73545  | C10orf189          | NM_028567_3_+1       |
| Camkmt        | 3.905  | 3.908  | 2.368  | 2.431  | 5.090  | 4.957  | 3.893  | 3.181  | 2.306  | 2.144  | 73582  | CAMKMT             | NM_028576_17_+1      |

|               |        |        |        |        |        |        |        |        |        |        |        |           |                 |
|---------------|--------|--------|--------|--------|--------|--------|--------|--------|--------|--------|--------|-----------|-----------------|
| Cybrd1        | -2.566 | 3.611  | -1.245 | -1.311 | 0.519  | -0.911 | -0.673 | -1.140 | -1.070 | -0.613 | 73649  | CYBRD1    | NM_028593_2_+1  |
| Ms4a6c        | 5.694  | 6.004  | 6.317  | 6.328  | 8.387  | 8.201  | 8.866  | 9.022  | 9.027  | 9.409  | 73656  | NA        | NM_028595_19_+1 |
| Fbrsl1        | 5.197  | 5.280  | 4.814  | 4.713  | 7.500  | 7.269  | 6.987  | 5.993  | 2.759  | 3.132  | 381668 | FBRSL1    | NM_028596_5_-1  |
| Thoc3         | 5.505  | 5.298  | 5.269  | 5.554  | 5.437  | 5.168  | 5.197  | 5.205  | 5.037  | 4.659  | 73666  | THOC3     | NM_028597_13_-1 |
| Rec114        | -0.781 | 1.328  | -2.062 | 0.721  | -1.621 | 1.263  | -0.689 | 0.538  | -2.905 | -0.151 | 73673  | REC114    | NM_028598_9_-1  |
| Wdr75         | 4.459  | 4.429  | 4.547  | 4.969  | 4.597  | 4.739  | 4.361  | 4.555  | 3.158  | 3.172  | 73674  | WDR75     | NM_028599_1_+1  |
| Zmiz2         | 6.126  | 5.564  | 6.242  | 5.713  | 7.021  | 6.741  | 6.478  | 6.117  | 5.969  | 6.176  | 52915  | ZMIZ2     | NM_028601_11_+1 |
| Zbtb8a        | 3.490  | 3.132  | 3.976  | 3.978  | 2.803  | 2.376  | 2.467  | 2.343  | 2.172  | 1.750  | 73680  | ZBTB8A    | NM_028603_4_-1  |
| Trmt11        | 4.267  | 4.506  | 3.674  | 3.854  | 4.130  | 4.136  | 3.971  | 3.860  | 3.738  | 3.454  | 73681  | TRMT11    | NM_028604_10_-1 |
| Bloc1s2       | 9.145  | 9.101  | 8.198  | 8.154  | 7.993  | 8.057  | 7.481  | 7.203  | 6.035  | 6.021  | 73689  | BLOC1S2   | NM_028607_19_-1 |
| Glipr1        | 8.050  | 7.603  | 7.941  | 8.317  | 7.608  | 7.755  | 7.508  | 7.566  | 6.626  | 7.007  | 73690  | GLIPR1    | NM_028608_10_-1 |
| Ndufaf7       | 5.217  | 4.986  | 4.899  | 4.353  | 5.609  | 4.452  | 5.362  | 3.913  | 5.926  | 4.078  | 73694  | NDUFAF7   | NM_028611_17_+1 |
| Ppp2r1b       | 4.761  | 4.919  | 4.987  | 5.031  | 5.291  | 5.446  | 5.056  | 5.420  | 5.158  | 5.349  | 73699  | PPP2R1B   | NM_028614_9_+1  |
| Dppa2         | -0.278 | 0.082  | -4.983 | -4.838 | -4.883 | -4.682 | -4.174 | -4.857 | -4.981 | -4.981 | 73703  | DPPIA2    | NM_028615_16_+1 |
| Mvbl2a        | 9.750  | 9.924  | 7.171  | 7.067  | 6.167  | 6.196  | 6.141  | 6.268  | 5.887  | 5.637  | 73711  | MVB12A    | NM_028617_8_+1  |
| Dmkn          | -4.981 | -4.981 | -4.915 | -3.412 | -3.440 | -2.642 | -4.522 | 1.327  | 0.277  | 1.270  | 73712  | DMKN      | NM_028618_7_+1  |
| Cst6          | -3.563 | -4.981 | -3.178 | -2.954 | -4.899 | -4.395 | -3.042 | -4.886 | -4.981 | -3.758 | 73720  | CST6      | NM_028623_19_-1 |
| Mcee          | 5.421  | 5.426  | 3.909  | 4.335  | 3.408  | 3.503  | 3.842  | 4.088  | 3.843  | 4.196  | 73724  | MCEE      | NM_028626_7_+1  |
| Psd           | 0.952  | 0.458  | 1.601  | 1.564  | 2.105  | 1.719  | 2.002  | 1.672  | 1.544  | 2.031  | 73728  | PSD       | NM_028627_19_-1 |
| Fcf1          | 6.937  | 6.900  | 6.643  | 6.714  | 6.471  | 6.388  | 6.725  | 6.451  | 5.633  | 5.262  | 73736  | FCF1      | NM_028632_12_+1 |
| Haus7         | 4.877  | 5.497  | 4.321  | 4.710  | 4.439  | 4.454  | 4.078  | 4.494  | 2.518  | 3.277  | 73738  | HAUS7     | NM_028633_X_-1  |
| Chy1          | 4.490  | 4.267  | 3.441  | 3.882  | 3.469  | 3.699  | 3.231  | 3.554  | 3.592  | 3.422  | 73739  | CBY1      | NM_028634_15_+1 |
| Man2c1        | 4.396  | 4.436  | 4.360  | 4.327  | 4.646  | 4.666  | 4.827  | 4.373  | 4.728  | 4.535  | 73744  | MAN2C1    | NM_028636_9_+1  |
| 1110034G24Rik | 3.926  | 3.914  | 3.112  | 2.798  | 3.760  | 3.698  | 3.558  | 3.857  | 4.441  | 4.179  | 73747  | C20orf196 | NM_028637_2_+1  |
| Gadl1         | -1.493 | -2.895 | -0.986 | -3.163 | -4.231 | -4.064 | -3.685 | -4.738 | -4.981 | -4.316 | 73748  | GADL1     | NM_028639_9_+1  |
| Ttc7          | 5.568  | 5.673  | 6.361  | 6.371  | 6.711  | 6.679  | 6.992  | 6.996  | 7.837  | 8.050  | 225049 | TTC7A     | NM_028639_17_+1 |
| Whrn          | 0.815  | 1.197  | -2.910 | -2.597 | -1.188 | -0.710 | -2.428 | -2.740 | -3.889 | -2.959 | 73750  | WHRN      | NM_028640_4_-1  |
| Micu2         | 6.647  | 6.830  | 6.437  | 6.559  | 6.570  | 6.550  | 6.5    |        |        |        |        |           |                 |

|               |           |        |        |        |        |        |        |        |        |        |        |        |               |                 |
|---------------|-----------|--------|--------|--------|--------|--------|--------|--------|--------|--------|--------|--------|---------------|-----------------|
|               | Hvcn1     | 8.086  | 8.169  | 2.739  | 3.249  | 6.324  | 6.763  | 5.305  | 5.648  | 3.718  | 2.285  | 74096  | HVCN1         | NM_028752_5_+1  |
|               | Pop7      | 5.871  | 6.047  | 5.373  | 5.328  | 5.191  | 5.211  | 5.142  | 5.070  | 4.004  | 3.873  | 74097  | POP7          | NM_028753_5_-1  |
| 0610037L13Rik |           | 6.185  | 6.351  | 5.473  | 5.465  | 5.449  | 5.820  | 5.464  | 5.378  | 4.183  | 4.314  | 74098  | C1orf123      | NM_028754_4_+1  |
|               | Arpp21    | -0.766 | 1.466  | -3.545 | -3.093 | -4.957 | -4.957 | -4.933 | -3.966 | -4.981 | -4.981 | 74100  | ARPP21        | NM_028755_9_-1  |
|               | Slc35a5   | 5.129  | 5.259  | 5.531  | 5.009  | 5.175  | 5.154  | 5.044  | 4.891  | 5.845  | 6.157  | 74102  | SLC35A5       | NM_028756_16_-1 |
|               | Nebi      | -4.981 | -4.981 | -4.618 | -4.078 | -4.943 | -4.408 | -4.710 | -3.363 | -3.491 | -2.795 | 74103  | NA            | NM_028757_2_-1  |
|               | Gga2      | 3.450  | 3.628  | 3.507  | 4.356  | 4.784  | 5.167  | 4.259  | 5.446  | 3.578  | 3.745  | 74105  | GGA2          | NM_028758_7_-1  |
|               | Dcaf6     | 0.939  | 2.138  | 2.601  | 2.825  | 1.853  | 1.675  | 0.975  | 2.018  | 2.464  | 2.808  | 74106  | DCAF6         | NM_028759_1_-1  |
|               | Cep55     | -4.686 | -4.692 | 1.314  | 1.614  | 1.675  | 1.239  | 1.546  | -0.203 | -2.704 | -0.330 | 74107  | CEP55         | NM_028760_19_+1 |
|               | Parn      | 5.482  | 5.466  | 4.788  | 4.678  | 5.083  | 5.187  | 4.684  | 4.690  | 4.772  | 4.376  | 74108  | PARN          | NM_028761_16_-1 |
|               | Rbm19     | 2.632  | 2.827  | 2.835  | 2.696  | 2.961  | 2.649  | 3.121  | 2.948  | 3.349  | 2.808  | 74111  | RBM19         | NM_028762_5_+1  |
|               | Cbx6      | 4.168  | 2.988  | 2.795  | 2.683  | 3.337  | 3.664  | 3.146  | 3.080  | 2.413  | 3.465  | 494448 | CBX6          | NM_028763_15_-1 |
|               | Acoxl     | -2.727 | -2.883 | -3.514 | -3.554 | -4.844 | -3.609 | -4.328 | -4.695 | -4.981 | -3.853 | 74121  | ACOXL         | NM_028765_2_+1  |
|               | Tmem43    | 4.887  | 4.945  | 5.237  | 5.406  | 4.777  | 4.959  | 5.172  | 5.568  | 7.792  | 7.759  | 74122  | TMEM43        | NM_028766_6_+1  |
|               | Foxp4     | 1.626  | 1.420  | 1.035  | 1.300  | 2.206  | 1.749  | 0.332  | 0.082  | -3.701 | 0.143  | 74123  | FOXp4         | NM_028767_17_-1 |
|               | Armc8     | 4.050  | 3.722  | 7.325  | 7.070  | 4.744  | 4.847  | 4.792  | 4.979  | 4.530  | 4.829  | 74125  | ARMC8         | NM_028768_9_-1  |
|               | Syvn1     | 3.991  | 3.533  | 4.548  | 4.513  | 3.970  | 4.212  | 4.093  | 4.220  | 3.984  | 3.565  | 74126  | SYVN1         | NM_028769_19_+1 |
|               | Krt80     | -3.843 | -4.981 | 1.992  | 1.389  | 4.233  | 2.507  | 5.246  | 4.333  | 6.548  | 5.869  | 74127  | KRT80         | NM_028770_15_-1 |
|               | Ccdc97    | 5.287  | 5.265  | 5.170  | 5.150  | 5.514  | 5.532  | 5.598  | 5.504  | 6.167  | 5.998  | 52132  | CCDC97        | NM_028771_7_-1  |
|               | Dmgdh     | -4.981 | -4.981 | -4.981 | -4.981 | -4.854 | -3.855 | -4.638 | -4.943 | -4.981 | -4.981 | 74129  | DMGDH         | NM_028772_13_+1 |
|               | Sash3     | 7.461  | 7.314  | 7.131  | 7.062  | 8.078  | 8.065  | 7.877  | 7.909  | 8.419  | 8.399  | 74131  | SASH3         | NM_028773_X_+1  |
|               | Rnf6      | 5.135  | 5.180  | 5.771  | 6.106  | 5.779  | 5.699  | 5.470  | 5.723  | 6.159  | 5.967  | 74132  | RNF6          | NM_028774_5_-1  |
|               | Cyp2s1    | -4.981 | -4.981 | 1.154  | 0.723  | 0.770  | 1.454  | 0.250  | -0.747 | -1.336 | -3.855 | 74134  | CYP2S1        | NM_028775_7_-1  |
|               | Scyl3     | 4.235  | 4.749  | 5.119  | 4.992  | 4.597  | 4.635  | 4.604  | 4.457  | 5.421  | 5.440  | 240880 | SCYL3         | NM_028776_1_+1  |
|               | Sec14l1   | 0.682  | 0.588  | 2.942  | 2.575  | 0.007  | 0.600  | 3.083  | 2.741  | 3.887  | 3.700  | 74136  | SEC14L1       | NM_028777_11_+1 |
|               | Nuak2     | 3.377  | 3.309  | 5.713  | 5.338  | 6.082  | 5.941  | 6.432  | 6.332  | 7.046  | 6.874  | 74137  | NUAK2         | NM_028778_1_+1  |
|               | Ampd2     | 1.612  | 1.639  | 3.456  | 2.886  | 2.799  | 2.795  | 2.302  | 2.600  | 3.835  | 3.294  | 109674 | AMPD2         | NM_028779_3_-1  |
|               | Tm9sf1    | 5.622  | 5.797  | 5.686  | 5.644  | 5.542  | 5.543  | 5.448  | 5.670  | 6.144  | 5.988  | 74140  | TM9SF1        | NM_028780_14_-1 |
|               | Lonp1     | 4.782  | 4.903  | 4.841  | 4.932  | 4.948  | 5.097  | 4.961  | 5.364  | 5.238  | 5.265  | 74142  | LONP1         | NM_028782_17_-1 |
|               | Robo4     | -4.981 | -3.621 | -3.966 | -2.938 | -4.978 | -4.664 | -3.682 | -3.869 | -4.981 | -4.981 | 74144  | ROBO4         | NM_028783_9_+1  |
|               | F13a1     | -4.981 | -2.749 | -0.976 | -1.962 | -1.645 | 0.039  | 3.710  | 6.516  | 12.089 | 11.980 | 74145  | F13A1         | NM_028784_13_-1 |
|               | Dock8     | 6.753  | 6.927  | 7.418  | 7.235  | 7.757  | 7.869  | 7.676  | 7.678  | 8.487  | 8.230  | 76088  | DOCK8         | NM_028785_19_+1 |
|               | Slc35f5   | 3.526  | 2.864  | 3.892  | 4.109  | 2.689  | 2.674  | 3.360  | 3.759  | 4.311  | 4.808  | 74150  | SLC35F5       | NM_028787_1_+1  |
|               | Stra6l    | 3.511  | 3.075  | 5.204  | 4.960  | 7.306  | 7.733  | 6.168  | 5.357  | 0.728  | 1.343  | 74152  | NA            | NM_028788_4_+1  |
|               | Unkl      | 2.136  | 2.544  | 1.426  | -0.546 | 1.076  | 1.590  | 1.127  | -1.544 | 0.186  | -1.837 | 74154  | UNKL          | NM_028789_17_+1 |
|               | Cmtr1     | 5.870  | 5.891  | 6.315  | 6.179  | 6.614  | 6.535  | 6.482  | 6.415  | 6.818  | 6.501  | 74157  | CMTR1         | NM_028791_17_+1 |
|               | Josd1     | 3.364  | 3.284  | 4.463  | 4.159  | 4.704  | 4.224  | 4.210  | 3.783  | 4.634  | 4.234  | 74158  | NA            | NM_028792_15_-1 |
|               | Acbd5     | 3.030  | 2.953  | 2.381  | 2.506  | 2.765  | 1.455  | 2.440  | -0.174 | 2.319  | 4.099  | 74159  | ACBD5         | NM_028793_2_+1  |
|               | Nudt9     | 5.661  | 5.481  | 6.903  | 7.031  | 5.283  | 5.477  | 5.129  | 5.327  | 4.530  | 4.578  | 74167  | NUDT9         | NM_028794_5_+1  |
|               | Gtsf1     | -4.981 | -4.981 | -4.961 | -4.961 | -4.979 | -4.955 | -4.935 | -4.895 | -1.845 | -0.601 | 74174  | GTSF1         | NM_028797_15_-1 |
|               | Stk40     | 2.929  | 2.683  | 4.250  | 4.041  | 5.678  | 4.966  | 5.570  | 5.091  | 6.932  | 6.488  | 74178  | STK40         | NM_028800_4_+1  |
|               | Muc5b     | -4.981 | -4.981 | -4.839 | -4.973 | -4.698 | -4.954 | -4.981 | -4.981 | -3.043 | -4.981 | 74180  | MUC5B         | NM_028801_7_+1  |
|               | Gpcpd1    | 7.647  | 7.779  | 5.665  | 5.859  | 6.232  | 6.914  | 6.296  | 6.438  | 6.788  | 6.761  | 74182  | GPCPD1        | NM_028802_2_-1  |
|               | Gbe1      | 3.347  | 3.721  | 2.911  | 2.685  | 3.616  | 2.743  | 3.561  | 3.259  | 4.107  | 3.786  | 74185  | GBE1          | NM_028803_16_+1 |
|               | Ccdc3     | -3.563 | -4.981 | -4.981 | -4.981 | -4.710 | -3.910 | -4.981 | -4.981 | -4.981 | -4.981 | 74186  | CCDC3         | NM_028804_2_+1  |
|               | Katnb1    | 3.570  | 3.638  | 3.335  | 3.800  | 3.639  | 3.667  | 3.117  | 3.273  | 3.771  | 3.460  | 74187  | KATNB1        | NM_028805_8_+1  |
|               | Exoc3l4   | -4.661 | -4.209 | -0.651 | 0.703  | -4.842 | -2.716 | -4.321 | -2.888 | -4.571 | -4.872 | 74190  | EXOC3L4       | NM_028807_12_+1 |
|               | P2ry13    | 6.925  | 6.565  | 1.892  | 2.507  | 2.625  | 2.335  | 4.711  | 5.453  | 2.693  | 4.209  | 74191  | P2RY13        | NM_028808_3_-1  |
|               | Arpc5l    | 8.375  | 8.468  | 7.620  | 7.736  | 7.903  | 8.007  | 7.252  | 7.215  | 5.973  | 5.798  | 74192  | ARPC5L        | NM_028809_2_+1  |
|               | Rnd3      | 7.789  | 8.194  | 6.245  | 6.226  | 7.897  | 8.910  | 7.325  | 8.113  | 6.706  | 8.298  | 74194  | RND3          | NM_028810_2_-1  |
|               | Elp3      | 1.890  | 2.905  | 1.935  | 2.698  | 2.233  | 2.223  | 2.383  | 1.913  | 1.420  | 1.910  | 74195  | ELP3          | NM_028811_14_-1 |
|               | Gtf2e1    | 3.984  | 3.762  | 3.971  | 3.896  | 3.771  | 3.891  | 3.592  | 3.500  | 3.414  | 3.517  | 74197  | GTF2E1        | NM_028812_16_-1 |
|               | Vit       | -4.981 | -4.981 | -2.811 | -4.814 | -1.570 | -4.951 | -3.626 | -4.954 | -4.981 | -4.981 | 74199  | VIT           | NM_028813_17_+1 |
| 2810403A07Rik |           | 4.878  | 4.924  | 5.583  | 5.431  | 5.524  | 5.407  | 5.360  | 5.470  | 5.885  | 5.888  | 74200  | KIAA0907      | NM_028814_3_+1  |
|               | Cep97     | 2.681  | 2.594  | 1.665  | 1.225  | 3.179  | 2.940  | 2.291  | 1.642  | 1.312  | 1.697  | 74201  | CEP97         | NM_028815_16_-1 |
|               | Xpo6      | 4.647  | 4.813  | 5.730  | 5.586  | 5.483  | 5.351  | 5.404  | 5.540  | 6.813  | 6.481  | 74204  | XPO6          | NM_028816_7_-1  |
|               | Acsl3     | -1.343 | -4.832 | 0.004  | -0.397 | -1.268 | -0.222 | 1.368  | 1.305  | 1.073  | 2.087  | 74205  | ACSL3         | NM_028817_1_+1  |
| 1700017B05Rik |           | 6.905  | 6.953  | 4.053  | 3.958  | 4.216  | 3.808  | 4.608  | 4.625  | 3.953  | 3.763  | 74211  | C15orf39      | NM_028820_9_-1  |
|               | Dnal1     | -0.628 | 1.432  | 0.245  | 0.342  | -0.776 | 0.165  | -2.513 | -1.859 | -4.181 | -2.367 | 105000 | DNAL1         | NM_028821_12_+1 |
|               | Paqr8     | -0.094 | -0.156 | 0.665  | 0.931  | 2.462  | 1.394  | 1.849  | 0.701  | 1.745  | 1.843  | 74229  | PAQR8         | NM_028829_1_+1  |
|               | Mterf2    | 4.233  | 3.832  | 2.527  | 2.353  | 1.295  | 1.167  | -0.524 | 0.441  | -1.438 | -0.561 | 74238  | MTERF2        | NM_028832_10_-1 |
|               | Iqce      | 2.338  | 2.629  | 2.661  | 2.543  | 2.833  | 2.916  | 2.596  | 2.806  | 3.969  | 3.941  | 74239  | IQCE          | NM_028833_5_-1  |
|               | Slx4ip    | 1.165  | 1.283  | 1.605  | 1.633  | 2.101  | 2.074  | 0.932  | 0.876  | -0.853 | -0.304 | 74243  | SLX4IP        | NM_028834_2_+1  |
|               | Atg7      | 3.805  | 3.875  | 4.241  | 4.531  | 4.152  | 4.686  | 4.835  | 5.225  | 6.703  | 6.634  | 74244  | ATG7          | NM_028835_6_+1  |
|               | Ctbs      | -1.884 | -2.487 | -0.357 | -2.361 | -1.863 | -1.741 | -0.736 | -3.188 | -0.780 | -0.791 | 74245  | CTBS          | NM_028836_3_+1  |
|               | Lrrc2     | -2.168 | -1.637 | -0.101 | -0.870 | -1.424 | -0.130 | -2.987 | -3.061 | -2.390 | -3.039 | 74249  | LRRC2         | NM_028838_9_+1  |
|               | Tmem110   | 4.285  | 3.859  | 5.238  | 4.873  | 6.033  | 5.680  | 6.143  | 5.374  | 5.506  | 5.185  | 69179  | TMEM110-MUSTN | NM_028839_14_+1 |
|               | Armc1     | 5.561  | 5.614  | 5.190  | 5.541  | 5.424  | 5.535  | 5.298  | 5.413  | 5.653  | 5.486  | 74252  | ARMC1         | NM_028840_3_-1  |
|               | Tspan17   | -0.565 | 1.293  | 2.675  | 3.220  | 1.071  | 1.489  | 3.126  | 3.703  | 4.573  | 4.525  | 74257  | TSPAN17       | NM_028841_13_+1 |
|               | Rnf138rt1 | -4.981 | -4.981 | -4.770 | -3.534 | -2.774 | -2.944 | -4.928 | -3.761 | -4.394 | -2.093 | 74264  | NA            | NM_028842_X_-1  |
|               | Aven      | 3.913  | 3.406  | 3.973  | 3.913  | 3.439  | 3.787  | 3.740  | 4.068  | 3.691  | 3.991  | 74268  | AVEN          | NM_028844_2_+1  |
|               | Usp20     | 4.129  | 4.133  | 3.137  | 3.241  | 2.501  | 2.109  | 1.821  | 2.344  | 2.906  | 2.475  | 74270  | USP20         | NM_028846_2_+1  |
|               | Chic2     | 7.369  | 7.861  | 6.495  | 6.412  | 6.233  | 6.224  | 6.189  | 6.126  | 6.012  | 6.187  | 74277  | CHIC2         | NM_028850_5_-1  |
|               | Mtmr3     | 4.739  | 4.783  | 5.211  | 5.317  | 5.799  | 5.858  | 5.759  | 5.835  | 7.301  | 7.010  | 74302  | MTMR3         | NM_028860_11_-1 |

|               |        |        |        |        |        |        |        |        |        |        |        |           |                  |
|---------------|--------|--------|--------|--------|--------|--------|--------|--------|--------|--------|--------|-----------|------------------|
| Rnf145        | 4.656  | 5.112  | 7.049  | 7.148  | 6.769  | 6.683  | 6.443  | 6.778  | 6.547  | 6.852  | 74315  | RNF145    | NM_028862_11_+_1 |
| Isca2         | 7.032  | 6.941  | 6.354  | 6.205  | 5.871  | 5.888  | 5.878  | 5.818  | 5.363  | 4.974  | 74316  | ISCA2     | NM_028863_12_+_1 |
| Zc3hav1       | 5.053  | 4.973  | 5.600  | 5.346  | 5.767  | 5.567  | 5.856  | 5.735  | 6.573  | 6.120  | 78781  | ZC3HAV1   | NM_028864_6_-_1  |
| Mettl23       | 7.059  | 5.557  | 5.530  | 4.352  | 6.150  | 4.864  | 5.972  | 4.615  | 4.940  | 3.691  | 74319  | METTL23   | NM_028865_11_+_1 |
| Wdr33         | 4.378  | 4.656  | 4.832  | 5.061  | 4.854  | 4.970  | 4.672  | 4.910  | 5.086  | 5.221  | 74320  | WDR33     | NM_028866_18_+_1 |
| Cxxc1         | 5.170  | 5.266  | 5.046  | 5.331  | 5.649  | 5.740  | 5.491  | 5.666  | 5.722  | 5.596  | 74322  | CXXC1     | NM_028868_18_+_1 |
| Cltb          | 5.644  | 5.481  | 5.945  | 5.976  | 5.378  | 5.226  | 5.485  | 4.951  | 3.893  | 3.463  | 74325  | CLTB      | NM_028870_13_-_1 |
| Hnrnpr        | 5.111  | 5.082  | 5.209  | 5.011  | 5.076  | 5.102  | 4.795  | 5.092  | 4.187  | 4.620  | 74326  | HNRNPR    | NM_028871_4_+_1  |
| 5730559C18Rik | -4.981 | -2.137 | -4.600 | -4.850 | 0.110  | 0.013  | -4.952 | -3.130 | -4.981 | -4.981 | 67313  | C1orf106  | NM_028872_1_-_1  |
| Dnajc14       | 5.135  | 5.262  | 5.726  | 5.732  | 5.490  | 5.395  | 5.474  | 5.717  | 6.731  | 6.697  | 74330  | DNAJC14   | NM_028873_10_+_1 |
| Snx19         | 3.113  | 3.520  | 4.107  | 4.156  | 4.282  | 4.424  | 4.161  | 3.934  | 4.588  | 4.753  | 102607 | SNX19     | NM_028874_9_+_1  |
| Xrcc3         | 1.461  | 1.274  | 1.379  | 1.187  | 1.939  | 1.581  | 1.945  | 1.718  | 2.226  | 2.426  | 74335  | XRCC3     | NM_028875_12_-_1 |
| Tmed5         | 7.726  | 7.683  | 6.942  | 6.815  | 6.850  | 6.816  | 7.039  | 6.866  | 6.424  | 6.772  | 73130  | TMED5     | NM_028876_5_-_1  |
| Paln3         | -4.981 | -4.981 | -4.943 | -4.210 | -3.989 | -4.541 | -4.260 | -4.809 | -4.981 | -4.981 | 74337  | PALM3     | NM_028877_8_+_1  |
| Crtc2         | 4.813  | 4.872  | 5.661  | 5.590  | 6.105  | 5.672  | 5.503  | 5.299  | 6.002  | 5.687  | 74343  | CRTC2     | NM_028881_3_+_1  |
| Sema3d        | -4.981 | -4.981 | -4.975 | -4.857 | -4.250 | -4.050 | -2.572 | -2.371 | -4.981 | -4.227 | 108151 | SEMA3D    | NM_028882_5_+_1  |
| Tldc1         | 2.529  | 1.686  | 2.020  | 1.972  | 2.240  | 2.387  | 1.600  | 1.967  | 2.811  | 2.794  | 74347  | TLDC1     | NM_028883_8_-_1  |
| Smchd1        | 5.524  | 5.253  | 6.144  | 5.768  | 6.420  | 6.260  | 6.434  | 6.207  | 6.163  | 6.209  | 74355  | SMCHD1    | NM_028887_17_-_1 |
| 4931428F04Rik | 2.185  | 1.693  | 0.531  | 0.708  | 1.714  | 1.211  | 0.265  | -0.440 | -2.050 | -1.140 | 74356  | KIAA0895L | NM_028888_8_-_1  |
| Efh1          | -1.627 | -4.981 | -2.176 | -2.272 | -3.666 | -1.075 | -2.367 | -0.170 | -1.540 | -2.172 | 98363  | EFHD1     | NM_028889_1_+_1  |
| 4931414P19Rik | 0.937  | 1.885  | -0.248 | -0.338 | 0.557  | 0.403  | -0.005 | -0.068 | 1.008  | 1.146  | 74359  | C14orf93  | NM_028890_14_-_1 |
| Spag17        | -4.981 | -1.294 | -1.725 | -2.435 | -2.411 | -2.759 | -2.787 | -2.203 | 0.519  | 0.010  | 74362  | SPAG17    | NM_028892_3_+_1  |
| Lonrf3        | -4.981 | -4.981 | -4.513 | -4.966 | -2.826 | -3.829 | -2.276 | -2.583 | 1.372  | 1.638  | 74365  | LONRF3    | NM_028894_X_+_1  |
| Rptor         | 3.936  | 3.641  | 2.949  | 3.431  | 4.220  | 4.371  | 2.985  | 3.021  | 4.013  | 4.085  | 74370  | RPTOR     | NM_028898_11_+_1 |
| Gcc1          | 3.101  | 3.097  | 3.561  | 3.375  | 3.432  | 3.540  | 3.417  | 3.047  | 4.645  | 4.526  | 74375  | GCC1      | NM_028900_6_-_1  |
| Myo18b        | -4.981 | -4.981 | -4.958 | -2.585 | -2.469 | -0.774 | -3.044 | -4.568 | -0.256 | -2.993 | 74376  | MYO18B    | NM_028901_5_-_1  |
| Hsf2bp        | -4.981 | -2.275 | -3.165 | -2.935 | -0.694 | -2.913 | -1.394 | -2.671 | -3.109 | -3.527 | 74377  | HSF2BP    | NM_028902_17_-_1 |
| Rmi1          | 3.518  | 3.695  | 4.240  | 3.820  | 3.902  | 3.888  | 3.821  | 4.130  | 4.108  | 4.335  | 74386  | RMI1      | NM_028904_13_+_1 |
| 4932438H23Rik | -4.818 | -4.778 | -1.876 | -2.706 | -3.551 | -1.229 | -1.616 | -4.119 | -4.940 | -4.981 | 74387  | C21orf62  | NM_028905_16_-_1 |
| Dpp8          | 4.074  | 3.852  | 5.383  | 5.364  | 5.147  | 5.443  | 5.133  | 5.525  | 6.203  | 6.751  | 74388  | DPP8      | NM_028906_9_+_1  |
| Map10         | 2.337  | 2.822  | 1.482  | 0.778  | 0.496  | -0.171 | 0.827  | 0.954  | 2.385  | 2.458  | 74393  | MAP10     | NM_028908_8_+_1  |
| Zfp819        | -2.494 | -4.981 | -2.142 | -3.556 | 0.319  | 0.787  | -0.104 | -1.428 | -3.531 | -4.227 | 74400  | NA        | NM_028913_7_+_1  |
| Lrrcc1        | 3.350  | 2.364  | 4.010  | 4.280  | 2.662  | 3.134  | 2.952  | 3.111  | 2.419  | 3.331  | 71710  | LRRC1     | NM_028915_3_+_1  |
| Ttc25         | -1.507 | -4.981 | -0.854 | -2.367 | -2.460 | -4.797 | -0.471 | -3.316 | -0.738 | -0.915 | 74407  | TTC25     | NM_028918_11_+_1 |
| Plpp6         | 4.631  | 4.830  | 5.139  | 5.316  | 3.820  | 4.007  | 3.906  | 4.032  | 3.947  | 4.295  | 74411  | PLPP6     | NM_028922_19_+_1 |
| Gle1          | 5.507  | 5.632  | 4.678  | 4.755  | 4.965  | 4.903  | 5.093  | 5.282  | 5.042  | 5.134  | 74412  | GLE1      | NM_028923_2_+_1  |
| Tc2n          | -4.981 | -4.373 | -4.632 | -4.945 | -4.840 | -4.957 | -4.705 | -4.931 | -3.608 | -4.928 | 74413  | TC2N      | NM_028924_12_-_1 |
| Polr3c        | 4.703  | 4.968  | 5.504  | 5.716  | 5.238  | 5.190  | 5.099  | 5.174  | 5.634  | 5.444  | 74414  | POLR3C    | NM_028925_3_-_1  |
| Eaf1          | 3.589  | 3.782  | 4.090  | 4.383  | 4.059  | 4.136  | 3.908  | 4.142  | 4.950  | 4.904  | 74427  | EAF1      | NM_028932_14_+_1 |
| Fam134c       | 1.912  | 1.459  | 0.305  | -0.054 | 1.357  | 1.109  | 1.549  | 1.071  | 1.592  | 1.606  | 67998  | FAM134C   | NM_028933_11_-_1 |
| 4930452B06Rik | -3.843 | -4.981 | -1.935 | -2.391 | -3.676 | -4.979 | -4.927 | -4.893 | -4.981 | -4.981 | 74430  | C3orf67   | NM_028934_14_-_1 |
| Zfp558        | -2.413 | -0.973 | -0.482 | 0.345  | -0.885 | -0.092 | -1.010 | -0.034 | -0.617 | 1.066  | 72230  | ZNF558    | NM_028935_9_-_1  |
| Lrriq3        | -1.165 | -0.580 | -1.572 | -0.895 | -1.158 | -0.920 | -2.868 | -2.743 | -4.981 | -2.598 | 74435  | LRRIQ3    | NM_028938_3_+_1  |
| Clvs1         | -4.981 | -1.384 | -4.981 | -4.981 | -4.947 | -4.951 | -4.404 | -4.965 | -4.981 | -4.981 | 74438  | CLVS1     | NM_028940_4_+_1  |
| Cmpip         | -4.343 | -4.154 | -3.169 | -4.798 | -2.954 | -4.944 | -2.041 | -1.189 | -4.502 | -4.788 | 74440  | CMIP      | NM_028941_8_+_1  |
| Sgms2         | -4.981 | -4.981 | -4.882 | -1.398 | -4.648 | -1.629 | 0.289  | 1.856  | 6.144  | 6.601  | 74442  | SGMS2     | NM_028943_3_-_1  |
| P4htm         | 0.686  | 2.218  | 0.003  | 0.683  | 1.060  | 1.596  | -0.339 | -0.445 | -3.750 | -0.616 | 74443  | P4HTM     | NM_028944_9_-_1  |
| Fam208a       | 4.900  | 5.253  | 4.307  | 4.100  | 4.742  | 4.547  | 4.941  | 4.404  | 4.293  | 4.831  | 218850 | FAM208A   | NM_028945_14_+_1 |
| Slc9b1        | -4.981 | -1.589 | -4.214 | -4.976 | -4.586 | -4.443 | -3.672 | -4.980 | -4.394 | -4.981 | 74446  | SLC9B1    | NM_028946_3_+_1  |
| Cfap53        | -4.981 | -4.981 | -4.223 | -3.171 | -2.480 | -4.488 | -4.352 | -4.981 | -4.981 | -2.516 | 74453  | CFAP53    | NM_028948_18_+_1 |
| Nsun6         | 2.739  | 3.122  | 2.109  | 2.125  | 2.550  | 1.897  | 2.356  | 2.008  | 2.295  | 2.166  | 74455  | NSUN6     | NM_028950_2_-_1  |
| Tmc1          | -4.981 | -4.981 | -4.977 | -4.319 | -3.188 | -2.763 | -4.491 | -4.894 | -4.981 | -2.969 | 13409  | TMC1      | NM_028953_19_-_1 |
| Pus10         | 2.112  | 2.602  | 3.159  | 2.855  | 2.698  | 2.890  | 2.170  | 1.710  | 2.161  | 2.571  | 74467  | PUS10     | NM_028956_11_+_1 |
| Cep72         | 2.495  | 3.088  | 1.322  | 1.313  | 2.239  | 2.213  | 2.356  | 2.164  | 1.890  | 1.541  | 74470  | CEP72     | NM_028959_13_-_1 |
| 4933427D14Rik | 3.513  | 3.671  | 3.289  | 2.861  | 3.296  | 3.258  | 2.787  | 2.977  | 2.843  | 2.406  | 74477  | KIAA0753  | NM_028963_11_-_1 |
| Snx29         | 4.577  | 4.817  | 2.650  | 2.652  | 2.597  | 2.849  | 2.288  | 2.689  | 2.876  | 3.055  | 74478  | SNX29     | NM_028964_16_+_1 |
| Snx11         | 2.952  | 3.249  | 2.800  | 2.765  | 3.709  | 3.549  | 2.731  | 2.945  | 2.335  | 2.353  | 74479  | SNX11     | NM_028965_11_-_1 |
| Samd4         | -3.709 | -4.255 | -3.340 | -4.902 | -3.509 | -3.293 | -2.829 | -3.355 | -4.981 | -4.854 | 74480  | SAMD4A    | NM_028966_14_+_1 |
| Batf2         | -2.345 | -4.981 | 1.345  | 2.044  | -0.805 | -1.024 | 0.840  | 1.656  | 1.941  | 2.255  | 74481  | BATF2     | NM_028967_19_+_1 |
| Lrrc71        | 1.355  | 0.006  | -1.794 | -3.028 | -2.103 | -1.362 | -0.817 | -1.183 | -1.579 | -1.517 | 74485  | LRRC71    | NM_028971_3_-_1  |
| Lrrc15        | 2.507  | 6.378  | -3.138 | -0.929 | -4.938 | -3.621 | -4.964 | -1.683 | -4.981 | -4.981 | 74488  | LRRC15    | NM_028973_16_-_1 |
| Tmem33        | 6.435  | 6.577  | 5.580  | 5.686  | 5.369  | 5.397  | 5.600  | 5.306  | 5.532  | 5.904  | 67878  | TMEM33    | NM_028975_5_+_1  |
| Gorasp1       | 2.978  | 2.630  | 2.879  | 2.873  | 2.375  | 2.322  | 3.177  | 3.472  | 4.416  | 4.197  | 74498  | GORASP1   | NM_028976_9_-_1  |
| Lrrc17        | -2.659 | -0.888 | -1.821 | -1.864 | -3.253 | -2.338 | -1.774 | -2.482 | -2.245 | -0.395 | 74511  | LRRC17    | NM_028977_5_+_1  |
| Cyp2j9        | -1.217 | 0.551  | -4.981 | -4.981 | -3.739 | -4.015 | -4.594 | -3.574 | -4.981 | -4.981 | 74519  | NA        | NM_028979_4_-_1  |
| Ppp4r4        | -3.349 | -4.981 | -4.981 | -4.981 | -5.012 | -4.932 | -4.885 | -4.447 | -4.981 | -3.386 | 74521  | PPP4R4    | NM_028980_12_+_1 |
| Cacna1d       | 4.202  | 4.998  | 0.046  | -0.900 | -1.488 | -0.844 | 1.489  | 2.102  | 3.783  | 3.298  | 12289  | CACNA1D   | NM_028981_14_-_1 |
| Fam234b       | 5.562  | 6.065  | 5.465  | 5.535  | 6.571  | 7.481  | 5.925  | 5.706  | 3.370  | 5.638  | 74525  | FAM234B   | NM_028982_6_+_1  |
| Mgme1         | 1.851  | -2.212 | 1.656  | 1.157  | 2.462  | 1.622  | 1.872  | 0.887  | 2.672  | 2.822  | 74528  | MGME1     | NM_028984_2_+_1  |
| Gzf1          | 3.557  | 3.545  | 3.672  | 3.567  | 3.596  | 3.453  | 4.106  | 4.137  | 4.925  | 5.177  | 74533  | GZF1      | NM_028986_2_+_1  |
| Tmem168       | 5.314  | 5.368  | 6.129  | 6.095  | 6.671  | 6.710  | 6.433  | 6.337  | 6.649  | 7.030  | 101118 | TMEM168   | NM_028990_6_-_1  |
| Gsdmc4        | -4.981 | -4.981 | -2.982 | -4.691 | -4.164 | -3.974 | -2.992 | -4.964 | -1.376 | -1.436 | 74548  | GSDMC     | NM_028992_15_-_1 |
| Mau2          | 5.203  | 5.293  | 5.560  | 5.692  | 5.725  | 5.775  | 5.614  | 5.731  | 6.116  | 6.235  | 74549  | MAU2      | NM_028993_8_-_1  |
| Pck2          | 4.057  | 3.741  | 3.028  | 2.793  | 3.307  | 2.511  | 4.263  | 4.041  | 4.788  | 3.758  | 74551  | PCK2      | NM_028994_14_+_1 |

|               |        |        |        |        |        |        |        |        |        |        |        |              |                     |
|---------------|--------|--------|--------|--------|--------|--------|--------|--------|--------|--------|--------|--------------|---------------------|
| Nipal3        | 4.187  | 4.609  | 3.999  | 3.762  | 3.419  | 3.877  | 2.763  | 2.918  | 2.335  | 2.686  | 74552  | NIPAL3       | NM_028995_4_-1      |
| Ppp6r3        | 4.158  | 4.129  | 4.889  | 4.918  | 4.330  | 4.545  | 4.496  | 4.998  | 5.777  | 5.941  | 52036  | PPP6R3       | NM_028999_19_-1     |
| Gvin1         | 1.369  | 0.441  | -0.540 | 0.329  | 1.890  | 0.606  | 3.420  | 1.855  | 3.956  | 3.578  | 74558  | NA           | NM_029000_7_-1      |
| Gvin1         | 1.006  | -1.782 | -0.151 | -2.555 | 1.804  | -2.149 | 2.757  | -1.042 | 3.792  | 1.772  | 74558  | NA           | NM_029000_dup1_7_-2 |
| Elov17        | -3.349 | -0.403 | -1.188 | -1.412 | -0.854 | -0.347 | -1.436 | -0.557 | 0.332  | 1.402  | 74559  | ELOVL7       | NM_029001_13_+1     |
| Rasgef1c      | -4.981 | -4.981 | -3.343 | -2.416 | -2.058 | -2.059 | -2.605 | -4.399 | -2.659 | -4.342 | 74563  | RASGEF1C     | NM_029004_11_+1     |
| Mkl1          | -0.085 | -1.842 | 0.138  | 0.313  | -0.772 | -1.731 | 0.544  | 2.207  | 4.207  | 3.571  | 74568  | MLKL         | NM_029005_8_-1      |
| Lvrn          | -4.981 | -4.981 | -4.029 | -3.001 | -4.984 | -4.984 | -4.981 | -4.981 | -4.981 | -4.981 | 74574  | LVRN         | NM_029008_18_+1     |
| Glb1l         | 1.552  | 1.318  | 3.184  | 2.821  | 2.578  | 2.231  | 2.531  | 2.387  | 3.290  | 2.865  | 74577  | GLB1L        | NM_029010_1_-1      |
| Pyroxd2       | -0.352 | 0.956  | -3.195 | 1.399  | -1.032 | -0.401 | -1.194 | 1.507  | 1.081  | 2.589  | 74580  | PYROXD2      | NM_029011_19_-1     |
| Sppl3         | 5.302  | 5.342  | 6.190  | 6.226  | 5.745  | 5.845  | 5.940  | 5.884  | 6.306  | 6.199  | 74585  | SPPL3        | NM_029012_5_+1      |
| Mrpl47        | 4.222  | 4.113  | 3.723  | 3.731  | 3.829  | 3.886  | 3.610  | 3.361  | 2.572  | 2.581  | 74600  | MRPL47       | NM_029017_3_-1      |
| Cd200r3       | -4.981 | -4.981 | -4.922 | -4.967 | -4.967 | -4.977 | 1.087  | -3.958 | -4.981 | -4.981 | 74603  | NA           | NM_029018_16_+1     |
| Stard6        | 0.373  | 0.127  | 0.212  | 0.764  | -0.519 | -1.156 | -1.200 | -3.211 | -0.786 | -2.071 | 170461 | STARD6       | NM_029019_18_+1     |
| Abcb8         | 3.384  | 3.600  | 4.116  | 4.150  | 3.459  | 3.717  | 3.385  | 3.614  | 3.595  | 3.662  | 74610  | ABCB8        | NM_029020_5_+1      |
| Ocstamp       | -4.981 | -3.408 | 5.835  | 6.066  | 1.550  | 2.488  | 4.577  | 4.757  | 2.517  | 2.782  | 74614  | OCTAMP       | NM_029021_2_-1      |
| Scrn3         | 0.877  | 1.494  | 2.536  | 2.670  | 2.339  | 2.678  | 1.810  | 2.201  | 1.927  | 2.225  | 74616  | SCRN3        | NM_029022_2_+1      |
| Scpep1        | 8.684  | 8.967  | 7.208  | 7.013  | 7.167  | 6.947  | 7.381  | 7.541  | 7.853  | 7.275  | 74617  | SCPEP1       | NM_029023_11_-1     |
| Tmem81        | 1.422  | 1.142  | 0.864  | 0.900  | 1.497  | 1.309  | 1.908  | 1.250  | 2.213  | 2.099  | 74626  | TMEM81       | NM_029025_1_+1      |
| Shpk          | 2.450  | 2.157  | 2.674  | 2.250  | 2.331  | 2.262  | 2.329  | 2.119  | 2.472  | 2.171  | 74637  | SHPK         | NM_029031_11_+1     |
| Spsb1         | 1.131  | 1.175  | 3.634  | 3.526  | 3.699  | 3.068  | 3.614  | 1.790  | -1.311 | 1.112  | 74646  | SPSB1        | NM_029035_4_-1      |
| S100pbp       | 2.148  | 2.719  | 2.816  | 2.588  | 4.026  | 4.041  | 2.438  | 2.103  | 1.305  | 0.982  | 74648  | S100PBP      | NM_029036_4_-1      |
| Pomk          | 3.433  | 3.987  | 2.958  | 3.681  | 3.206  | 3.642  | 3.414  | 4.162  | 4.517  | 5.209  | 74653  | POMK         | NM_029037_8_-1      |
| Lrrc48        | -1.818 | -1.527 | -3.355 | -3.859 | -4.647 | -4.400 | -3.411 | -3.258 | -3.925 | -4.981 | 74665  | DRC3         | NM_029044_11_+1     |
| 4930432K21Rik | 0.969  | 0.927  | -2.534 | -2.129 | -2.240 | -2.229 | -1.959 | -2.837 | -4.703 | -2.340 | 74666  | C19orf57     | NM_029045_8_+1      |
|               | -2.362 | -1.991 | 0.516  | 1.533  | 2.302  | 5.532  | 0.911  | 2.976  | -0.092 | 1.193  | 74694  | TBC1D30      | NM_029057_10_-1     |
| Wbp2nl        | -4.981 | -4.981 | -4.895 | -3.444 | -3.618 | -3.820 | -4.976 | -4.900 | -4.981 | -4.981 | 74716  | WBP2NL       | NM_029066_15_+1     |
| Snx16         | 3.135  | 2.781  | 2.084  | 2.019  | 2.221  | 2.503  | 2.442  | 2.241  | 1.966  | 2.169  | 74718  | SNX16        | NM_029068_3_-1      |
| Cnep1r1       | 4.327  | 4.229  | 4.304  | 4.103  | 3.917  | 3.610  | 4.125  | 3.782  | 3.942  | 4.137  | 382030 | CNEP1R1      | NM_029074_8_+1      |
| Stx11         | 2.191  | 0.748  | 3.806  | 3.137  | 3.152  | 1.896  | 4.087  | 3.508  | 5.916  | 5.034  | 74732  | STX11        | NM_029075_10_-1     |
| Trim14        | 5.955  | 5.922  | 5.754  | 5.389  | 6.449  | 6.290  | 5.996  | 5.804  | 5.936  | 5.905  | 74735  | TRIM14       | NM_029077_4_-1      |
| Pcf11         | 5.081  | 5.277  | 5.337  | 5.082  | 5.401  | 5.622  | 5.373  | 5.223  | 5.252  | 5.369  | 74737  | PCF11        | NM_029078_7_-1      |
| C2cd5         | 4.142  | 4.737  | 3.316  | 2.836  | 4.291  | 3.802  | 3.482  | 3.277  | 3.843  | 4.579  | 74741  | C2CD5        | NM_029081_6_-1      |
| DDit4         | 1.256  | 0.144  | 0.785  | -0.152 | 3.165  | 2.345  | 3.791  | 3.002  | 3.869  | 3.779  | 74747  | DDIT4        | NM_029083_10_-1     |
| Slamf8        | 3.294  | 1.747  | 8.714  | 8.487  | 7.337  | 6.551  | 7.953  | 7.282  | 5.863  | 5.007  | 74748  | SLAMF8       | NM_029084_1_-1      |
| Trmo          | 4.189  | 3.573  | 3.041  | 2.865  | 3.545  | 3.300  | 3.286  | 3.041  | 2.670  | 3.023  | 74753  | TRMO         | NM_029086_4_-1      |
| Naa60         | 5.817  | 5.907  | 5.650  | 5.648  | 6.222  | 6.037  | 6.106  | 6.325  | 7.113  | 7.229  | 74763  | NAA60        | NM_029090_16_+1     |
| Klc4          | 3.576  | 3.738  | 3.678  | 3.551  | 3.260  | 3.367  | 3.707  | 3.286  | 4.722  | 3.792  | 74764  | KLC4         | NM_029091_17_-1     |
| Trmt10c       | 5.018  | 4.769  | 5.074  | 5.014  | 4.776  | 4.714  | 4.755  | 4.683  | 4.310  | 4.265  | 52575  | TRMT10C      | NM_029092_16_-1     |
| Pik3cb        | 4.067  | 3.504  | 7.747  | 7.687  | 7.201  | 7.348  | 6.481  | 6.352  | 5.272  | 5.680  | 74769  | PIK3CB       | NM_029094_9_-1      |
| Rita1         | 1.319  | 1.184  | 0.682  | 0.501  | 0.609  | 1.185  | 0.871  | 0.803  | 1.861  | 1.700  | 100764 | RITA1        | NM_029096_5_-1      |
| Atp13a2       | 6.491  | 6.725  | 4.703  | 5.338  | 4.735  | 5.210  | 5.158  | 5.724  | 7.090  | 7.129  | 74772  | ATP13A2      | NM_029097_4_+1      |
| Lmbr1l        | 3.202  | 2.936  | 3.939  | 3.789  | 3.892  | 3.726  | 3.814  | 3.968  | 4.678  | 4.642  | 74775  | LMBR1L       | NM_029098_15_-1     |
| Sepn1         | 3.531  | 3.484  | 1.872  | 2.008  | 1.414  | 1.198  | 3.386  | 3.893  | 5.719  | 5.753  | 74777  | SELENON      | NM_029100_4_-1      |
| Rrp7a         | 5.738  | 5.808  | 5.652  | 5.809  | 5.446  | 5.460  | 5.605  | 5.754  | 5.671  | 5.597  | 74778  | RRP7A        | NM_029101_15_-1     |
| GlT8d2        | -4.981 | -4.981 | -3.901 | -3.876 | -3.826 | -3.783 | -3.942 | -4.802 | -2.192 | -3.205 | 74782  | GLT8D2       | NM_029102_10_-1     |
| Manf          | 8.916  | 8.959  | 7.297  | 7.744  | 6.263  | 6.810  | 6.645  | 7.670  | 5.699  | 6.659  | 74840  | MANF         | NM_029103_9_-1      |
| Mss51         | -0.599 | 0.318  | -0.957 | -1.654 | -1.002 | -0.623 | -1.503 | -0.369 | -0.256 | -0.498 | 74843  | MSS51        | NM_029104_14_-1     |
| Meikin        | -4.981 | -4.981 | -4.932 | -4.932 | -5.003 | -5.003 | -4.884 | -4.821 | -4.981 | -4.981 | 74847  | MEIKIN       | NM_029105_11_+1     |
| Fam228a       | -4.981 | -2.759 | -4.933 | -4.293 | -2.710 | -4.208 | -4.587 | -4.917 | -4.029 | -4.981 | 74855  | FAM228A      | NM_029107_12_-1     |
| Morn3         | -4.981 | -3.267 | -3.402 | -4.606 | -4.977 | -4.977 | -3.821 | -3.865 | -3.351 | -3.853 | 74890  | MORN3        | NM_029112_5_-1      |
| Ccdc181       | 4.614  | 5.278  | 3.932  | 4.090  | 3.872  | 4.183  | 3.534  | 3.512  | 2.366  | 2.644  | 74895  | CCDC181      | NM_029115_1_+1      |
| Kbtbd11       | 4.931  | 4.849  | 4.549  | 3.939  | 3.388  | 2.917  | 4.090  | 3.858  | 3.212  | 3.148  | 74901  | KBTBD11      | NM_029116_8_+1      |
| Qtrtd1        | 1.800  | 1.834  | 2.185  | 2.352  | 1.814  | 2.098  | 2.037  | 2.322  | 1.930  | 2.545  | 106248 | QTRT2        | NM_029128_16_-1     |
| Cep57l1       | 3.264  | 3.523  | 1.568  | 1.488  | 2.073  | 2.757  | 1.267  | 0.013  | 0.113  | -1.007 | 103268 | CEP57L1      | NM_029132_10_-1     |
| Syce1l        | -4.981 | -4.981 | -4.979 | -4.979 | -4.960 | -4.972 | -4.572 | -4.950 | -4.981 | -4.981 | 668110 | SYCE1L       | NM_029139_8_+1      |
| Tmbim7        | 0.905  | -0.694 | -4.943 | -4.961 | -4.981 | -4.981 | -4.981 | -4.981 | -4.981 | -4.981 | 75010  | NA           | NM_029141_5_+1      |
| Tmx4          | 4.423  | 4.533  | 3.267  | 3.394  | 3.550  | 3.658  | 3.828  | 3.935  | 5.339  | 5.398  | 52837  | TMX4         | NM_029148_2_-1      |
| Scamp1        | 3.252  | 4.109  | 3.504  | 3.912  | 2.861  | 3.137  | 3.598  | 4.031  | 4.236  | 4.933  | 107767 | SCAMP1       | NM_029153_13_-1     |
| Tmbim7        | 1.258  | -1.170 | -4.248 | -4.950 | -4.981 | -4.981 | -4.956 | -4.308 | -4.981 | -4.981 | 75010  | NA           | NM_029154_5_+1      |
| Sf3a3         | 6.486  | 6.436  | 6.096  | 6.155  | 6.451  | 6.319  | 6.316  | 6.180  | 5.495  | 5.515  | 75062  | SF3A3        | NM_029157_4_+1      |
| Zbtb49        | 2.564  | 2.095  | 2.308  | 2.270  | 2.197  | 2.228  | 1.649  | 2.255  | 2.236  | 2.207  | 75079  | ZBTB49       | NM_029162_5_-1      |
| Usp50         | -1.884 | -4.981 | -4.502 | -4.198 | -3.441 | -4.587 | -4.295 | -4.565 | -2.224 | -3.191 | 75083  | USP50        | NM_029163_2_-1      |
| Uhrf1bp1l     | 5.535  | 5.290  | 5.250  | 4.629  | 5.902  | 5.236  | 5.621  | 4.882  | 5.836  | 5.424  | 75089  | UHRF1BP1L    | NM_029166_10_+1     |
| Rbm6          | 0.425  | 1.502  | 2.454  | 1.767  | 1.538  | 2.843  | 2.001  | 2.227  | 3.315  | 3.316  | 19654  | RBM6         | NM_029169_9_-1      |
| Nxn12         | -2.842 | -2.060 | -4.272 | -3.646 | -3.837 | -3.398 | -4.589 | -4.090 | -4.981 | -4.981 | 75124  | NXN12        | NM_029173_13_+1     |
| Rasd2         | -4.981 | -4.981 | -1.100 | -1.970 | -0.108 | 0.935  | 1.488  | 0.920  | -1.792 | -1.809 | 75141  | RASD2        | NM_029182_8_+1      |
| Mfsd13a       | 1.884  | 0.199  | 2.062  | 1.840  | 2.049  | 1.731  | 2.883  | 1.855  | 4.003  | 3.315  | 75146  | MFSD13A      | NM_029186_19_+1     |
| Ccdc146       | -3.349 | -4.981 | -3.540 | -2.281 | -2.162 | -1.746 | -1.930 | -2.543 | -1.883 | -1.733 | 75172  | CCDC146      | NM_029195_5_-1      |
| Tex38         | -1.422 | -1.620 | -3.557 | -3.641 | -4.839 | -4.509 | -4.870 | -4.862 | -4.981 | -4.981 | 75173  | TEX38        | NM_029196_4_-1      |
| Meiob         | -1.002 | -0.629 | -4.825 | -2.470 | -4.628 | 1.229  | -4.941 | -2.697 | -4.981 | -1.823 | 75178  | MEIOB        | NM_029197_17_+1     |
| 4930538K18Rik | -2.842 | -3.408 | -4.960 | -4.960 | -2.926 | -4.467 | -2.720 | -2.801 | -2.053 | -4.342 | 75180  | LOC100129924 | NM_029198_4_-1      |
|               | -4.981 | -3.509 | -4.981 | -4.981 | -4.178 | -4.747 | -4.981 | -4.981 | -4.410 | -4.446 | 75196  | ANKRD7       | NM_029202_6_+1      |
| Sv2c          | 1.276  | -0.509 | -2.983 | -4.987 | -4.384 | -4.957 | -3.688 | -4.488 | -4.057 | -4.316 | 75209  | SV2C         | NM_029210_13_-1     |

|               |        |        |        |        |        |        |        |        |        |        |        |              |                 |
|---------------|--------|--------|--------|--------|--------|--------|--------|--------|--------|--------|--------|--------------|-----------------|
| Rnf121        | 3.675  | 3.922  | 3.260  | 3.728  | 3.508  | 3.480  | 2.995  | 3.206  | 2.796  | 3.271  | 75212  | RNF121       | NM_029211_7_-1  |
| Ccdc33        | -4.981 | -4.981 | -4.088 | -3.390 | -4.994 | -4.994 | -4.845 | -4.218 | -4.981 | -4.981 | 382077 | CCDC33       | NM_029212_9_-1  |
| Chd5          | -4.981 | -4.981 | -4.650 | -4.650 | -4.135 | -4.950 | -4.581 | -3.629 | -1.157 | -4.096 | 269610 | CHD5         | NM_029216_4_+1  |
| Rnf19b        | 5.868  | 6.101  | 6.880  | 6.934  | 6.961  | 7.107  | 6.976  | 6.571  | 6.644  | 6.821  | 75234  | RNF19B       | NM_029219_4_+1  |
| Pelp1         | 2.192  | 2.163  | 2.809  | 2.593  | 2.943  | 2.252  | 2.878  | 2.255  | 2.658  | 2.702  | 75273  | PELP1        | NM_029231_11_-1 |
| Bcdin3d       | 3.807  | 3.955  | 1.656  | 1.540  | 1.866  | 1.881  | 2.401  | 2.634  | 2.937  | 2.705  | 75284  | BCDIN3D      | NM_029236_15_-1 |
| Prkd3         | 1.965  | 1.871  | 3.108  | 2.615  | 1.957  | 1.875  | 3.176  | 2.957  | 2.629  | 2.897  | 75292  | PRKD3        | NM_029239_17_-1 |
| Ankrd53       | -4.981 | -4.981 | -3.503 | -4.850 | -4.756 | -4.743 | -4.959 | -4.824 | -4.981 | -4.227 | 75305  | ANKRD53      | NM_029245_6_+1  |
| 4930550C14Rik | -2.727 | -4.981 | -2.670 | -1.903 | -4.833 | -4.741 | -3.361 | -4.764 | -1.911 | -2.266 | 75311  | C11orf65     | NM_029247_9_+1  |
| Taf1d         | 2.080  | 1.726  | 1.459  | 1.344  | 0.870  | 0.794  | 1.602  | 1.441  | 1.746  | -0.046 | 75316  | TAF1D        | NM_029248_9_+1  |
| Parpbbp       | -2.620 | -0.152 | 0.934  | 1.071  | 1.350  | 0.388  | 1.077  | 0.304  | -0.623 | -1.249 | 75317  | PARPBP       | NM_029249_10_-1 |
| Etnk1         | 6.045  | 5.999  | 6.086  | 5.823  | 6.897  | 6.658  | 6.330  | 5.888  | 5.871  | 6.086  | 75320  | ETNK1        | NM_029250_6_+1  |
| Atf7ip2       | -4.981 | -4.981 | -4.954 | -4.954 | -1.310 | -2.627 | -3.550 | -4.968 | -4.981 | -4.981 | 75329  | ATF7IP2      | NM_029253_16_+1 |
| Spdya         | -1.083 | -0.496 | -2.015 | -0.829 | -0.955 | -1.511 | -0.296 | -1.362 | -1.311 | -0.565 | 70891  | SPDYA        | NM_029254_17_+1 |
| 4930564C03Rik | -3.843 | -4.981 | -3.788 | -3.651 | -4.765 | -4.950 | -4.209 | -4.612 | -4.981 | -4.342 | 75341  | NA           | NM_029257_17_-1 |
| Boll          | -4.981 | -4.981 | -2.464 | -2.929 | -2.749 | -4.405 | -3.128 | -4.690 | -4.981 | -4.981 | 75388  | BOLL         | NM_029267_1_-1  |
| Spp2          | -4.981 | -2.365 | -4.981 | -4.981 | -4.981 | -4.981 | -4.981 | -4.981 | -4.981 | -4.981 | 75396  | SPP2         | NM_029269_1_+1  |
| Arhgap24      | 4.620  | 4.389  | -2.599 | -1.231 | -3.259 | -0.709 | -0.814 | 1.056  | 3.827  | 2.416  | 231532 | ARHGAP24     | NM_029270_5_+1  |
| Mrpl32        | 6.384  | 6.575  | 5.687  | 5.720  | 5.550  | 5.704  | 5.744  | 5.543  | 4.672  | 4.851  | 75398  | MRPL32       | NM_029271_13_-1 |
| Ndufs7        | 7.953  | 7.882  | 6.727  | 6.782  | 6.985  | 7.179  | 7.263  | 7.228  | 6.685  | 6.543  | 75406  | NDUFS7       | NM_029272_10_+1 |
| Kmt2b         | 2.717  | 3.218  | 1.992  | 0.632  | 2.623  | 1.092  | 1.930  | 1.665  | -0.202 | 1.024  | 75410  | KMT2B        | NM_029274_7_-1  |
| Arhgap12      | 4.590  | 4.940  | 3.595  | 3.152  | 2.921  | 3.255  | 3.428  | 3.280  | 2.782  | 3.467  | 75415  | ARHGAP12     | NM_029277_18_-1 |
| Nop14         | 4.750  | 4.554  | 5.294  | 5.097  | 4.612  | 4.784  | 4.598  | 4.494  | 3.609  | 3.297  | 75416  | NOP14        | NM_029278_5_-1  |
| Secisbp2      | 4.937  | 4.930  | 4.870  | 4.841  | 5.260  | 5.301  | 5.088  | 4.854  | 4.456  | 4.663  | 75420  | SECISBP2     | NM_029279_13_+1 |
| Mettl5        | 5.027  | 4.766  | 3.858  | 3.688  | 4.105  | 4.104  | 4.157  | 4.019  | 3.216  | 3.372  | 75422  | METTL5       | NM_029280_2_-1  |
| Zfp820        | 0.477  | 0.869  | -3.468 | -2.902 | -3.965 | -3.096 | -4.444 | -2.074 | -4.981 | -2.062 | 75424  | NA           | NM_029281_17_-1 |
| Tti1          | 3.304  | 3.797  | 4.894  | 4.601  | 4.878  | 4.928  | 4.546  | 4.152  | 4.296  | 4.243  | 75425  | TTI1         | NM_029282_2_-1  |
| Ccdc30        | -4.981 | -3.682 | -4.981 | -4.981 | -4.975 | -4.975 | -4.981 | -4.981 | -4.981 | -4.981 | 73332  | NA           | NM_029286_4_-1  |
| 170001103Rik  | -4.981 | -2.600 | 0.172  | -0.983 | 2.045  | 1.714  | 0.629  | -1.067 | -3.088 | -1.874 | 75444  | NA           | NM_029290_18_+1 |
| Ascc2         | 4.026  | 3.860  | 4.451  | 4.836  | 4.438  | 4.644  | 4.371  | 4.501  | 4.509  | 4.921  | 75452  | ASCC2        | NM_029291_11_+1 |
| Phpt1         | 5.822  | 5.651  | 4.504  | 4.649  | 5.277  | 5.491  | 5.084  | 4.840  | 3.114  | 3.220  | 75454  | PHPT1        | NM_029293_2_-1  |
| Prps11l       | -4.981 | -4.981 | -3.241 | -4.959 | -4.981 | -4.981 | -4.494 | -4.798 | -2.149 | -4.981 | 75456  | PRPS11L      | NM_029294_12_+1 |
| Cklf          | 5.366  | 5.682  | 4.930  | 4.706  | 5.099  | 5.280  | 5.436  | 5.262  | 4.293  | 4.743  | 75458  | CKLF         | NM_029295_8_+1  |
| 1700001C19Rik | -4.981 | -4.981 | -2.743 | -4.224 | -2.253 | -4.379 | -1.642 | -4.863 | -2.598 | -4.981 | 75462  | LOC102723903 | NM_029296_17_-1 |
| Dynlrb2       | -2.842 | -2.239 | -4.981 | -4.981 | -4.988 | -4.648 | -4.049 | -4.907 | -4.981 | -4.981 | 75465  | DYNLRB2      | NM_029297_8_+1  |
| 1700003F12Rik | -2.268 | -4.981 | -2.754 | -4.131 | -3.023 | -3.777 | -2.946 | -3.081 | -3.750 | -4.316 | 75480  | NA           | NM_029305_2_+1  |
| 1700012B09Rik | -4.981 | -4.981 | -4.979 | -4.979 | -2.661 | -3.984 | -2.103 | -4.999 | -0.932 | -1.995 | 69325  | C11orf97     | NM_029306_9_-1  |
| Hspb9         | -4.981 | -4.981 | -2.623 | -4.586 | -4.834 | -4.937 | -3.814 | -4.368 | -2.552 | -3.459 | 75482  | HSPB9        | NM_029307_11_+1 |
| Pou5f2        | 1.554  | 1.927  | 0.434  | 1.078  | 1.606  | 1.595  | 1.294  | 0.358  | 0.559  | 0.514  | 75507  | POU5F2       | NM_029315_13_+1 |
| Pibf1         | 4.656  | 4.958  | 4.037  | 3.827  | 4.324  | 4.480  | 4.287  | 4.306  | 3.779  | 3.915  | 52023  | PIBF1        | NM_029320_14_+1 |
| Ttc32         | 4.338  | 4.513  | 3.695  | 3.657  | 3.745  | 3.923  | 3.868  | 3.534  | 2.921  | 3.129  | 75516  | TTC32        | NM_029321_12_+1 |
| Tex29         | -4.981 | -4.981 | -4.045 | -4.978 | -4.750 | -4.837 | -4.935 | -4.816 | -3.738 | -4.316 | 75528  | NA           | NM_029326_8_+1  |
| Lymr7         | 3.219  | 2.764  | -0.483 | -2.212 | 0.504  | -2.253 | 0.255  | -1.093 | -0.428 | -1.848 | 75530  | LYRM7        | NM_029327_11_-1 |
| Fpgt          | 3.391  | 3.256  | 2.913  | 2.919  | 2.762  | 2.830  | 2.888  | 2.967  | 3.183  | 4.004  | 75540  | FPGT         | NM_029330_3_-1  |
| Nat8f4        | 0.672  | 1.009  | 0.564  | 1.585  | 0.973  | 1.736  | 0.826  | -0.278 | -0.568 | 0.181  | 75541  | NA           | NM_029331_6_-1  |
| Akap13        | 6.398  | 6.512  | 7.345  | 7.435  | 8.345  | 8.409  | 8.104  | 7.952  | 8.872  | 8.885  | 75547  | AKAP13       | NM_029332_7_+1  |
| Zc3h14        | 5.866  | 6.075  | 5.590  | 5.786  | 5.551  | 5.496  | 5.313  | 5.563  | 5.304  | 5.730  | 75553  | ZC3H14       | NM_029334_12_+1 |
| Spata45       | -4.981 | -4.981 | -4.667 | -4.604 | -4.102 | -4.991 | -4.492 | -4.792 | -4.981 | -4.981 | 75558  | SPATA45      | NM_029336_1_+1  |
| Ep400         | 2.765  | 1.705  | 3.289  | 2.395  | 3.042  | 2.724  | 2.817  | 2.845  | 3.074  | 2.324  | 75560  | EP400        | NM_029337_5_-1  |
| Rspsh9        | -0.419 | -4.981 | -1.485 | -3.446 | -3.804 | -4.955 | -2.213 | -4.127 | -0.581 | -2.946 | 75564  | RSPSH9       | NM_029338_17_-1 |
| Sgf29         | 5.150  | 5.158  | 4.750  | 4.804  | 4.821  | 4.799  | 5.025  | 4.915  | 4.333  | 4.137  | 75565  | SGF29        | NM_029339_7_+1  |
| Capsl         | 0.496  | 1.499  | -0.282 | -0.189 | 2.546  | 1.889  | 1.062  | 0.076  | -0.660 | 1.299  | 75568  | CAPSL        | NM_029341_15_+1 |
| Nhej1         | 2.562  | 2.732  | 2.123  | 1.880  | 1.866  | 1.753  | 1.871  | 1.876  | 2.289  | 2.424  | 75570  | NHEJ1        | NM_029342_1_-1  |
| Spata9        | -0.642 | -3.408 | -3.540 | -4.771 | -4.371 | -4.341 | -4.014 | -4.511 | -3.531 | -4.227 | 75571  | SPATA9       | NM_029343_13_+1 |
| Acyp2         | 0.135  | 2.274  | -1.863 | 1.812  | -0.746 | 1.414  | -0.080 | 2.216  | 0.348  | 1.639  | 75572  | ACYP2        | NM_029344_11_-1 |
| Prr29         | -4.981 | -4.981 | -4.928 | -3.617 | -1.770 | 1.448  | -3.141 | -1.392 | -4.190 | -4.981 | 75573  | PRR29        | NM_029345_11_+1 |
| Fggy          | 2.919  | 3.283  | -1.434 | -1.091 | -2.303 | -0.388 | -2.514 | -0.890 | -1.788 | 0.941  | 75578  | FGGY         | NM_029347_4_+1  |
| Zbtb4         | 3.663  | 3.762  | 2.607  | 2.869  | 3.030  | 3.417  | 3.276  | 2.917  | 1.897  | 1.935  | 75580  | ZBTB4        | NM_029348_11_+1 |
| 2310035C23Rik | 4.008  | 3.642  | 1.919  | 0.490  | 2.613  | 3.050  | 2.912  | 0.411  | 1.212  | 3.195  | 227446 | KIAA1468     | NM_029349_1_+1  |
| Dusp9         | 4.054  | 4.059  | -1.422 | -0.762 | 0.643  | -0.221 | -0.412 | -1.670 | -3.925 | -3.229 | 75590  | DUSP9        | NM_029352_X_+1  |
| Malsu1        | 5.581  | 5.487  | 4.517  | 4.633  | 4.216  | 4.309  | 4.560  | 4.401  | 4.029  | 3.857  | 75593  | MALSU1       | NM_029353_6_+1  |
| Mzt2          | 3.875  | 3.725  | 2.448  | 2.867  | 2.286  | 2.385  | 2.404  | 2.528  | 2.294  | 2.179  | 72083  | MZT2A        | NM_029354_16_-1 |
| Pcdh1         | -4.981 | -4.981 | 1.596  | 1.914  | 1.411  | 3.437  | 1.388  | 1.424  | -4.981 | -4.981 | 75599  | PCDH1        | NM_029357_18_-1 |
| Tm4sf5        | 2.868  | 2.280  | 3.355  | 3.351  | 1.737  | 0.906  | 1.286  | -0.193 | -4.981 | -4.981 | 75604  | TM4SF5       | NM_029360_11_+1 |
| Wnk2          | -4.981 | -4.981 | -4.981 | -4.981 | -4.515 | -4.969 | -4.978 | -4.672 | -1.919 | -4.366 | 75607  | WNK2         | NM_029361_13_-1 |
| Chmp4b        | 4.833  | 3.841  | 4.607  | 3.904  | 4.194  | 3.711  | 4.724  | 3.752  | 4.258  | 3.741  | 75608  | CHMP4B       | NM_029362_2_+1  |
| 2010109A12Rik | -1.384 | -4.981 | -2.772 | -4.603 | -4.621 | -4.565 | -4.286 | -4.997 | -4.981 | -4.342 | 75610  | NA           | NM_029363_5_+1  |
| Gns           | 7.694  | 7.212  | 7.750  | 7.624  | 7.284  | 6.572  | 7.240  | 7.058  | 7.451  | 7.117  | 75612  | GNS          | NM_029364_10_+1 |
| Med25         | 3.840  | 3.752  | 3.189  | 3.621  | 3.578  | 3.457  | 3.924  | 4.012  | 5.043  | 4.657  | 75613  | MED25        | NM_029365_7_-1  |
| Kxd1          | 6.864  | 6.627  | 6.356  | 6.113  | 6.245  | 6.088  | 6.309  | 6.194  | 6.147  | 5.970  | 75620  | KXD1         | NM_029366_8_-1  |
| Tex30         | 5.461  | 4.433  | 4.292  | 4.018  | 3.869  | 3.654  | 4.378  | 4.153  | 2.981  | 3.072  | 75623  | TEX30        | NM_029368_1_-1  |
| Htatsf1       | 3.876  | 4.798  | 3.450  | 4.024  | 3.917  | 3.863  | 3.659  | 3.397  | 3.810  | 3.628  | 72459  | HTATSF1      | NM_029371_X_+1  |
| Lin37         | 6.021  | 5.826  | 5.228  | 5.087  | 5.235  | 5.200  | 5.215  | 4.819  | 4.247  | 4.063  | 75660  | LIN37        | NM_029377_7_-1  |
| Tex22         | -4.981 | -3.315 | -3.139 | -4.147 | -4.510 | -3.880 | -4.671 | -4.621 | -4.981 | -3.165 | 75671  | TEX22        | NM_029381_12_+1 |

|               |        |        |        |        |        |        |        |        |        |        |        |             |                 |
|---------------|--------|--------|--------|--------|--------|--------|--------|--------|--------|--------|--------|-------------|-----------------|
| Tmem238       | -0.907 | -0.339 | 2.369  | 2.204  | 2.267  | 2.261  | 3.032  | 2.558  | 0.617  | 0.316  | 664968 | TMEM238     | NM_029384_7_-1  |
| Nudt16        | 6.714  | 6.959  | 6.005  | 5.951  | 5.891  | 6.032  | 5.277  | 5.153  | 4.225  | 4.291  | 75686  | NUDT16      | NM_029385_9_-1  |
| Fam35a        | 4.208  | 4.339  | 4.143  | 3.827  | 4.824  | 4.912  | 4.133  | 3.469  | 3.887  | 3.542  | 75698  | FAM35A      | NM_029389_14_-1 |
| Rab4b         | 7.386  | 7.378  | 7.103  | 7.105  | 7.209  | 7.300  | 6.755  | 6.725  | 6.701  | 6.301  | 19342  | RAB4B       | NM_029391_7_-1  |
| Krt24         | -3.349 | -4.981 | -4.940 | -4.601 | -4.981 | -4.981 | -4.981 | -4.981 | -4.981 | -4.981 | 75706  | KRT24       | NM_029393_11_-1 |
| Snx24         | 0.487  | -2.060 | 4.264  | 4.103  | 0.777  | -0.010 | 0.779  | 2.101  | -0.359 | 3.316  | 69226  | SNX24       | NM_029394_18_+1 |
| Rbm12         | 3.359  | 2.604  | 4.254  | 4.107  | 4.385  | 3.982  | 3.460  | 3.804  | 4.692  | 4.595  | 75710  | RBM12       | NM_029397_2_-1  |
| Tmem14a       | 1.374  | 1.533  | 0.447  | 0.718  | 2.832  | 1.680  | 1.523  | 0.623  | 0.292  | 0.519  | 75712  | TMEM14A     | NM_029398_1_+1  |
| Cul2          | 4.837  | 4.970  | 5.161  | 5.256  | 4.816  | 4.981  | 4.764  | 4.908  | 4.902  | 5.299  | 71745  | CUL2        | NM_029402_18_+1 |
| Phf14         | -0.216 | 0.393  | -0.224 | -1.267 | 0.068  | 0.029  | -0.458 | -1.081 | -0.352 | -0.172 | 75725  | PHF14       | NM_029404_6_+1  |
| Pih1d1        | 4.678  | 4.297  | 3.842  | 3.715  | 3.551  | 2.962  | 3.796  | 3.563  | 3.552  | 2.952  | 68845  | PIH1D1      | NM_029406_7_+1  |
| Fam227a       | -4.981 | -1.321 | -2.817 | -2.971 | -4.099 | -3.899 | -3.912 | -3.473 | -1.170 | -2.426 | 75729  | FAM227A     | NM_029407_15_-1 |
| Iqcd          | -3.843 | -2.160 | -4.853 | -4.853 | -4.250 | -4.299 | -2.955 | -2.163 | -2.377 | -1.922 | 75732  | IQCD        | NM_029408_5_+1  |
| Mff           | 6.978  | 6.452  | 6.512  | 6.061  | 6.703  | 6.084  | 6.549  | 6.067  | 6.608  | 6.257  | 75734  | NA          | NM_029409_1_+1  |
| Bcl2l12       | 4.349  | 4.358  | 3.542  | 3.326  | 4.281  | 4.295  | 3.858  | 3.607  | 3.269  | 2.879  | 75736  | BCL2L12     | NM_029410_7_-1  |
| Egfm1         | -4.351 | -4.981 | -4.981 | -4.981 | -4.981 | -4.981 | -4.981 | -4.981 | -4.981 | -4.981 | 75740  | NA          | NM_029412_3_+1  |
| Morc4         | -4.848 | -4.647 | -4.981 | -4.980 | -4.938 | -4.978 | -4.873 | -4.966 | -4.981 | -4.933 | 75746  | MORC4       | NM_029413_X_-1  |
| 9130401M01Rik | 5.448  | 5.340  | 5.446  | 5.315  | 5.403  | 5.333  | 5.595  | 5.434  | 5.647  | 5.252  | 75758  | C8orf76     | NM_029418_15_-1 |
| Apol7a        | -4.981 | -4.981 | -4.638 | -4.952 | -4.974 | -4.974 | -4.980 | -4.980 | -4.981 | -4.981 | 75761  | NA          | NM_029419_15_-1 |
| Slx1b         | 2.379  | 2.286  | 2.833  | 1.862  | 2.622  | 1.825  | 2.804  | 2.693  | 2.999  | 3.326  | 75764  | SLX1A SLX1B | NM_029420_7_-1  |
| Dcstamp       | -4.920 | -4.981 | -0.174 | 2.459  | -1.520 | 2.177  | -2.895 | 0.430  | -4.864 | -4.943 | 75766  | DCSTAMP     | NM_029422_15_+1 |
| Rab11fip1     | 1.446  | 1.537  | 5.664  | 5.612  | 5.274  | 5.171  | 5.094  | 4.588  | 4.905  | 4.379  | 75767  | RAB11FIP1   | NM_029423_8_-1  |
| Brsk2         | -1.872 | -4.685 | -2.832 | -3.849 | -4.975 | -4.981 | -3.450 | -4.241 | -4.826 | -2.560 | 75770  | BRSK2       | NM_029426_7_+1  |
| Them4         | 2.407  | 2.383  | 1.759  | 1.898  | 1.096  | 1.405  | 1.122  | 1.126  | 0.997  | 1.683  | 75778  | THEM4       | NM_029431_3_+1  |
| 4930402H24Rik | 2.510  | 2.503  | 2.793  | 2.593  | 2.192  | 2.620  | 1.857  | 2.292  | 2.846  | 3.154  | 228602 | C2orf194    | NM_029432_2_-1  |
| Lca5          | 0.183  | 0.087  | -2.973 | -3.053 | -2.166 | -4.756 | -1.696 | -2.716 | -4.981 | -4.481 | 75782  | LCA5        | NM_029434_9_-1  |
| Klhl24        | 5.554  | 5.611  | 5.302  | 5.131  | 5.120  | 5.218  | 5.536  | 5.496  | 6.259  | 6.440  | 75785  | KLHL24      | NM_029436_16_+1 |
| Kcap5         | -2.084 | -0.430 | 1.588  | -0.039 | -0.313 | -0.448 | -0.498 | -0.123 | -1.956 | -2.249 | 75786  | CKAP5       | NM_029437_2_+1  |
| Smurf1        | 0.908  | 2.658  | 2.084  | 1.260  | 2.243  | 1.537  | 2.152  | 2.306  | 2.274  | 2.935  | 75788  | SMURF1      | NM_029438_5_-1  |
| Wdr95         | -2.842 | -4.981 | 1.078  | -1.899 | -0.401 | 0.564  | 0.201  | -2.783 | -3.925 | -4.981 | 381693 | NA          | NM_029440_5_+1  |
| Cdyl2         | 4.904  | 4.308  | 4.681  | 4.358  | 5.960  | 5.601  | 5.241  | 4.327  | 3.625  | 2.923  | 75796  | CDYL2       | NM_029441_8_-1  |
| 4930447C04Rik | 0.338  | -4.981 | -3.058 | -4.569 | -3.914 | -4.973 | -2.455 | -4.819 | -4.981 | -4.981 | 75801  | C14orf39    | NM_029444_12_-1 |
| Nln           | 2.655  | 3.270  | 3.803  | 3.746  | 2.007  | 2.344  | 3.457  | 4.184  | 5.083  | 5.067  | 75805  | NLN         | NM_029447_13_-1 |
| Ppp6r3        | 2.678  | 2.819  | 2.161  | 2.127  | 3.266  | 2.425  | 2.842  | 1.888  | 2.730  | 2.070  | 52036  | PPP6R3      | NM_029456_19_-1 |
| Senp2         | 4.667  | 4.530  | 5.436  | 5.206  | 5.189  | 5.336  | 5.243  | 5.210  | 5.893  | 5.587  | 75826  | SENP2       | NM_029457_16_+1 |
| Tex26         | -4.981 | -4.981 | -4.981 | -4.981 | -3.096 | -4.214 | -4.743 | -4.757 | -4.981 | -4.981 | 75860  | TEX26       | NM_029464_5_+1  |
| Clec4g        | 4.841  | 5.057  | 0.002  | -0.953 | 0.946  | 1.762  | 2.016  | 2.018  | -0.251 | -3.165 | 75863  | CLEC4G      | NM_029465_8_-1  |
| Arl5b         | 2.462  | 2.726  | 3.130  | 3.056  | 2.490  | 2.523  | 2.719  | 2.457  | 2.693  | 3.139  | 75869  | ARL5B       | NM_029466_2_+1  |
| Tcam1         | -2.164 | -4.981 | -4.947 | -4.947 | -3.735 | -4.622 | -3.543 | -4.768 | -3.109 | -4.981 | 75870  | NA          | NM_029467_11_+1 |
| Zfp821        | -3.800 | -4.068 | -2.291 | -4.752 | -2.631 | -2.556 | -2.344 | -4.450 | -4.226 | -0.940 | 75871  | ZNF821      | NM_029468_8_+1  |
| Adal          | 2.189  | 3.476  | 1.693  | 1.759  | 1.614  | 2.421  | 1.632  | 2.232  | 2.036  | 2.803  | 75894  | ADAL        | NM_029475_2_+1  |
| Vmp1          | 6.439  | 6.482  | 6.301  | 6.374  | 6.645  | 6.732  | 6.831  | 6.911  | 6.717  | 6.881  | 75909  | VMP1        | NM_029478_11_-1 |
| 4930579G24Rik | 3.278  | 3.253  | 2.755  | 2.919  | 3.196  | 2.652  | 2.840  | 2.817  | 2.559  | 2.322  | 75939  | C4orf46     | NM_029482_3_+1  |
| Spata24       | 1.449  | 2.533  | 0.299  | 0.502  | 0.887  | 1.468  | 0.171  | 0.589  | -2.141 | -2.383 | 71242  | SPATA24     | NM_029485_18_-1 |
| Trappc8       | 0.863  | -0.464 | 1.625  | 0.845  | 0.961  | 0.672  | 1.374  | 0.676  | 2.335  | 2.176  | 75964  | TRAPPC8     | NM_029491_18_-1 |
| Zdhhc20       | 6.730  | 7.057  | 6.457  | 6.134  | 5.823  | 5.762  | 6.178  | 6.322  | 6.908  | 7.155  | 75965  | ZDHHC20     | NM_029492_14_-1 |
| Rab30         | 3.702  | 4.149  | 6.414  | 6.620  | 6.713  | 7.151  | 4.605  | 4.769  | -3.373 | -0.884 | 75985  | RAB30       | NM_029494_7_+1  |
| Epsti1        | 7.297  | 7.426  | 8.181  | 8.339  | 7.623  | 7.058  | 7.578  | 7.027  | 6.936  | 6.717  | 108670 | EPSTI1      | NM_029495_14_+1 |
| Urb1          | 3.306  | 3.245  | 3.517  | 3.571  | 3.722  | 3.850  | 3.346  | 3.250  | 3.081  | 3.173  | 207932 | URB1        | NM_029497_16_-1 |
| Zmyym2        | 5.577  | 5.578  | 5.373  | 5.161  | 5.425  | 5.382  | 5.298  | 5.186  | 4.991  | 5.563  | 76007  | ZMYM2       | NM_029498_14_+1 |
| Ms4a4c        | 6.371  | 6.910  | 4.621  | 4.665  | 8.764  | 7.920  | 8.554  | 8.548  | 8.998  | 9.105  | 64380  | NA          | NM_029499_19_+1 |
| Cant1         | 3.749  | 4.216  | 3.513  | 4.151  | 3.714  | 4.490  | 3.150  | 4.206  | 4.512  | 4.884  | 76025  | CANT1       | NM_029502_11_-1 |
| Ap3m2         | 4.441  | 4.564  | 3.733  | 3.573  | 4.198  | 4.151  | 3.541  | 3.615  | 3.974  | 4.093  | 64933  | AP3M2       | NM_029505_8_-1  |
| Pcgf5         | 4.541  | 4.762  | 4.993  | 4.833  | 4.824  | 4.705  | 4.471  | 4.218  | 4.213  | 4.250  | 76073  | PCGF5       | NM_029508_19_+1 |
| Gbp8          | 5.950  | 5.926  | 5.133  | 5.116  | 7.027  | 7.520  | 6.281  | 6.040  | 0.874  | 1.564  | 76074  | NA          | NM_029509_5_-1  |
| Bcor          | 1.886  | 1.805  | 1.438  | 2.101  | 3.220  | 2.864  | 2.224  | 1.350  | 3.801  | 3.673  | 71458  | BCOR        | NM_029510_X_-1  |
| Ttpal         | 1.859  | 2.812  | 0.138  | 1.432  | 1.665  | 1.039  | 2.006  | 2.868  | 1.076  | 2.843  | 76080  | TTPAL       | NM_029512_2_+1  |
| Rap2a         | 2.995  | 3.178  | 5.291  | 5.070  | 4.546  | 4.555  | 5.858  | 6.135  | 6.456  | 7.091  | 76108  | RAP2A       | NM_029519_14_+1 |
| Gpsm2         | -3.398 | 0.553  | -0.379 | 1.427  | -0.414 | 1.166  | 1.430  | 2.705  | 3.702  | 3.888  | 76123  | GPSM2       | NM_029522_3_-1  |
| Depdc1a       | -4.981 | -4.981 | -4.594 | -4.861 | -3.775 | -4.924 | -4.639 | -3.258 | -4.835 | -1.639 | 76131  | DEPDC1      | NM_029523_3_+1  |
| Prex2         | -4.981 | -4.981 | -4.951 | -4.951 | -4.943 | -4.943 | -4.961 | -4.971 | -4.981 | -4.981 | 109294 | PREX2       | NM_029525_1_+1  |
| Fam131b       | -4.981 | -3.613 | -4.710 | -3.706 | -1.620 | -0.696 | -4.090 | -4.581 | -4.981 | -4.981 | 76156  | FAM131B     | NM_029528_6_-1  |
| Slc35d3       | -0.311 | 0.271  | -4.415 | -0.561 | -0.741 | 0.522  | -1.739 | -3.892 | -4.394 | -4.981 | 76157  | SLC35D3     | NM_029529_10_-1 |
| Zfp60         | 3.121  | 3.500  | 3.296  | 3.235  | 3.576  | 3.469  | 3.363  | 3.165  | 2.266  | 3.131  | 22718  | NA          | NM_029531_7_+1  |
| Snrnp35       | 4.317  | 4.591  | 3.559  | 3.468  | 3.450  | 3.023  | 3.141  | 3.046  | 2.619  | 2.399  | 76167  | SNRNP35     | NM_029532_5_+1  |
| Tmem98        | -3.349 | -2.883 | -4.934 | -0.309 | -4.876 | -1.871 | -2.805 | -0.665 | -4.981 | -1.759 | 103743 | TMEM98      | NM_029537_11_+1 |
| Dtd2          | 4.700  | 4.516  | 3.726  | 3.778  | 3.647  | 3.239  | 3.634  | 3.325  | 3.329  | 3.034  | 328092 | DTD2        | NM_029545_12_-1 |
| Pwp2          | 3.156  | 2.915  | 3.375  | 3.314  | 3.704  | 3.598  | 3.580  | 3.594  | 4.025  | 3.705  | 110816 | NA          | NM_029546_10_-1 |
| Rph3al        | -4.981 | -3.267 | -2.516 | -1.946 | -2.046 | 0.105  | -2.766 | -1.149 | -2.305 | -3.165 | 380714 | RPH3AL      | NM_029548_11_-1 |
| Ttc8          | 2.834  | 3.135  | 3.077  | 3.287  | 2.242  | 2.781  | 0.381  | 1.745  | -0.925 | -0.852 | 76260  | TTC8        | NM_029553_12_+1 |
| 0610040J01Rik | -0.554 | -2.883 | 3.450  | 2.859  | 0.355  | -3.681 | 3.065  | 2.235  | 4.607  | 3.992  | 76261  | C4orf19     | NM_029554_5_+1  |
| Gstk1         | 5.003  | 5.485  | 3.074  | 3.106  | 4.222  | 4.424  | 3.506  | 3.448  | 2.044  | 2.195  | 76263  | GSTK1       | NM_029555_6_+1  |
| Clybl         | 5.645  | 5.745  | 4.139  | 4.142  | 3.488  | 3.918  | 3.469  | 3.742  | 3.103  | 2.781  | 69634  | CLYBL       | NM_029556_14_+1 |
| Tsen54        | 3.324  | 3.286  | 4.175  | 4.311  | 3.942  | 3.885  | 3.796  | 3.936  | 3.541  | 3.540  | 76265  | TSEN54      | NM_029557_11_+1 |

|               |        |        |        |        |        |        |        |        |        |        |           |              |                 |
|---------------|--------|--------|--------|--------|--------|--------|--------|--------|--------|--------|-----------|--------------|-----------------|
| Ndfip2        | 5.448  | 5.826  | 5.046  | 5.271  | 4.634  | 5.020  | 4.562  | 5.207  | 4.911  | 5.439  | 76273     | NDFIP2       | NM_029561_14_+1 |
| Cyp2d26       | -4.981 | -4.981 | -4.948 | -4.179 | -4.759 | -4.974 | -4.981 | -4.981 | -4.981 | -4.227 | 76279     | NA           | NM_029562_15_-1 |
| Rap1gap       | -1.458 | -0.808 | -0.246 | 0.237  | -3.388 | -2.178 | -2.706 | -2.513 | -1.049 | -1.227 | 110351    | RAP1GAP      | NM_029563_4_+1  |
| Tax1bp3       | 3.812  | 3.486  | 5.398  | 5.303  | 4.511  | 4.344  | 5.456  | 5.199  | 4.984  | 4.778  | 76281     | TAX1BP3      | NM_029564_11_+1 |
| Tmem59        | 9.893  | 9.991  | 8.567  | 8.564  | 8.621  | 8.842  | 8.695  | 8.858  | 8.532  | 8.703  | 56374     | TMEM59       | NM_029565_4_+1  |
| Asb5          | -1.262 | 0.561  | -0.257 | -0.655 | -3.273 | -3.094 | -4.406 | -2.607 | -1.540 | -2.425 | 76294     | ASB5         | NM_029569_8_+1  |
| Atp11b        | 5.398  | 5.397  | 5.639  | 5.650  | 5.923  | 5.658  | 6.062  | 5.886  | 6.752  | 6.889  | 76295     | ATP11B       | NM_029570_3_+1  |
| Kti12         | 4.816  | 4.599  | 4.759  | 4.778  | 4.522  | 4.386  | 4.642  | 4.523  | 4.499  | 4.197  | 100087    | KTI12        | NM_029571_4_+1  |
| Erp44         | 7.758  | 7.837  | 7.662  | 7.916  | 6.509  | 6.718  | 6.716  | 7.261  | 6.887  | 7.272  | 76299     | ERP44        | NM_029572_4_-1  |
| Idh3a         | 6.470  | 6.696  | 5.998  | 6.275  | 6.328  | 6.522  | 6.093  | 6.168  | 4.930  | 4.986  | 67834     | IDH3A        | NM_029573_9_+1  |
| Tgfbr2        | 4.107  | 3.943  | 4.465  | 4.595  | 3.861  | 4.481  | 5.181  | 5.443  | 5.283  | 5.855  | 21813     | TGFBR2       | NM_029575_9_-1  |
| Rab1b         | 7.121  | 7.096  | 7.571  | 7.770  | 7.293  | 7.328  | 7.367  | 7.599  | 8.355  | 8.202  | 76308     | RAB1B        | NM_029576_19_-1 |
| Tgds          | 4.573  | 4.750  | 4.566  | 4.562  | 4.460  | 4.612  | 3.927  | 4.238  | 3.762  | 3.991  | 76355     | TGDS         | NM_029578_14_-1 |
| Trmt5         | 3.628  | 3.662  | 3.262  | 3.500  | 2.962  | 3.209  | 3.175  | 2.966  | 2.479  | 2.705  | 76357     | TRMT5        | NM_029580_12_-1 |
| Mtif3         | 2.199  | 2.504  | 3.295  | 3.695  | 2.879  | 2.218  | 2.448  | 2.513  | 2.125  | 2.213  | 76366     | MTIF3        | NM_029581_5_-1  |
| Txndc11       | 6.090  | 5.837  | 5.364  | 5.202  | 4.695  | 5.022  | 5.055  | 5.679  | 5.606  | 5.738  | 106200    | TXNDC11      | NM_029582_16_-1 |
| Zfp773        | 0.077  | 0.309  | -0.633 | -0.224 | 0.006  | 0.782  | -0.623 | 0.509  | -0.248 | 1.440  | 76373     | NA           | NM_029584_7_-1  |
| Det1          | 2.862  | 2.665  | 3.092  | 2.951  | 3.126  | 3.020  | 3.016  | 3.090  | 3.073  | 3.205  | 76375     | DET1         | NM_029585_7_-1  |
| Cep112        | -4.981 | -4.981 | -4.981 | -4.981 | -4.384 | -4.926 | -4.965 | -4.729 | -4.981 | -4.981 | 76380     | CEP112       | NM_029586_11_+1 |
| H2al1m        | -4.981 | -4.981 | -3.730 | -4.007 | -4.306 | -4.857 | -3.871 | -3.473 | -4.981 | -4.006 | 76383     | LOC101928761 | NM_029588_X_+1  |
| Tmem53        | -4.552 | -1.355 | -4.952 | -4.952 | -4.978 | -3.796 | -4.856 | -4.968 | -2.659 | -1.580 | 68777     | TMEM53       | NM_029589_4_+1  |
| Abcc3         | 1.222  | -0.338 | 1.451  | 1.563  | 2.125  | 1.113  | 1.946  | 3.671  | 3.011  | 5.518  | 76408     | ABCC3        | NM_029600_11_-1 |
| Ift43         | -3.977 | -4.760 | -4.921 | -4.923 | -4.907 | -4.932 | -4.849 | -4.954 | -4.961 | -4.855 | 76411     | IFT43        | NM_029601_12_+1 |
| Znrd1as       | 1.268  | 1.291  | 0.537  | 0.805  | 0.717  | 0.975  | 0.039  | -0.031 | -1.135 | -0.437 | 76416     | NA           | NM_029602_17_+1 |
| Pifo          | 2.245  | 1.894  | -2.174 | -2.131 | -2.961 | -4.584 | -3.271 | -1.564 | -4.394 | -3.855 | 100503311 | PIFO         | NM_029604_3_-1  |
| Cep112        | -4.981 | -4.981 | -1.247 | -2.586 | -0.659 | -0.351 | -3.591 | -2.039 | -2.605 | -4.981 | 76380     | CEP112       | NM_029606_11_+1 |
| Gid8          | -4.678 | -1.801 | -2.656 | -3.167 | -2.649 | -4.182 | -3.032 | -4.276 | -0.102 | -4.935 | 76425     | GID8         | NM_029607_2_+1  |
| Fam209        | -0.147 | -0.341 | -1.046 | -2.208 | -1.749 | -2.283 | -0.792 | -2.203 | -0.266 | -0.733 | 76426     | FAM209B      | NM_029608_2_+1  |
| Lhpp          | 2.533  | 2.632  | 3.779  | 4.242  | 4.649  | 4.740  | 4.205  | 4.086  | 2.648  | 3.092  | 76429     | LHPP         | NM_029609_7_+1  |
| Lyrm1         | -0.992 | -1.421 | -0.848 | -0.469 | -0.432 | -1.377 | -0.910 | -2.298 | -1.503 | -2.277 | 73919     | LYRM1        | NM_029610_7_+1  |
| Slamf9        | 9.381  | 9.512  | 2.483  | 2.872  | 2.434  | 2.669  | 4.567  | 4.870  | 1.822  | 0.651  | 98365     | SLAMF9       | NM_029612_1_+1  |
| Prss23        | -4.981 | -4.981 | -4.349 | -4.956 | -4.677 | -4.488 | -4.915 | -4.850 | -4.981 | -4.981 | 76453     | PRSS23       | NM_029614_7_-1  |
| Med27         | -0.812 | 0.576  | -0.838 | -1.026 | -0.965 | -1.177 | -1.138 | -0.772 | -0.736 | 0.079  | 68975     | MED27        | NM_029615_2_+1  |
| Knl1          | 3.230  | -0.221 | 3.838  | 3.473  | 4.132  | 3.407  | 3.617  | 2.469  | 1.614  | 1.367  | 76464     | KNL1         | NM_029617_2_+1  |
| Msrb2         | 3.652  | 3.880  | 2.052  | 1.930  | 2.494  | 0.771  | 1.958  | 1.132  | 2.391  | 1.037  | 76467     | MSRB2        | NM_029619_2_+1  |
| Pcolce2       | 0.761  | -4.981 | -0.475 | -1.501 | 0.143  | -2.345 | 0.292  | -1.328 | -2.305 | -3.480 | 76477     | PCOLCE2      | NM_029620_9_+1  |
| Haus8         | 2.026  | 0.143  | 1.923  | 2.344  | 4.534  | 4.432  | 3.233  | 2.172  | 0.998  | 0.643  | 76478     | HAUS8        | NM_029621_8_-1  |
| 3110002H16Rik | 6.080  | 6.542  | 5.681  | 5.791  | 5.656  | 5.790  | 5.294  | 5.634  | 5.867  | 5.886  | 76482     | C18orf8      | NM_029623_18_+1 |
| Lmf1          | 5.658  | 5.716  | 4.132  | 4.353  | 4.081  | 4.320  | 4.372  | 4.989  | 5.596  | 6.017  | 76483     | LMF1         | NM_029624_17_+1 |
| Glt8d1        | 3.160  | 3.410  | 1.192  | 1.089  | 1.051  | 1.156  | 1.031  | 2.039  | 3.021  | 3.117  | 76485     | GLT8D1       | NM_029626_14_+1 |
| Ly6k          | 5.714  | 5.272  | -1.317 | -1.550 | -2.502 | -1.293 | -1.060 | 0.631  | -2.712 | -4.227 | 76486     | NA           | NM_029627_15_-1 |
| Fahd2a        | 4.482  | 4.758  | 3.529  | 4.104  | 3.122  | 3.719  | 3.014  | 3.568  | 2.638  | 2.908  | 68126     | FAHD2B       | NM_029629_2_-1  |
| Abhd14b       | 4.972  | 1.996  | 0.501  | -4.706 | 2.102  | -4.730 | 2.054  | -4.190 | 1.312  | -3.210 | 76491     | ABHD14B      | NM_029631_9_+1  |
| Ppp1r11       | 7.474  | 7.507  | 7.964  | 8.164  | 7.465  | 7.813  | 6.917  | 6.788  | 5.094  | 5.153  | 76497     | PPP1R11      | NM_029632_17_-1 |
| Clasp2        | 1.572  | 1.919  | 1.765  | 1.716  | 2.363  | 2.377  | 1.653  | 2.438  | 1.446  | 1.438  | 76499     | CLASP2       | NM_029633_9_+1  |
| Ip6k2         | 1.303  | 1.903  | 1.128  | 1.196  | 0.638  | 1.097  | 0.360  | 0.952  | 0.072  | 1.347  | 76500     | IP6K2        | NM_029634_9_+1  |
| Commmd9       | 4.981  | 5.031  | 4.000  | 4.517  | 4.107  | 4.236  | 3.905  | 4.185  | 3.620  | 3.754  | 76501     | COMMMD9      | NM_029635_2_+1  |
| Aoc1          | -4.981 | -4.981 | -4.936 | -4.936 | -2.960 | -0.566 | -2.642 | -4.120 | -4.981 | -4.981 | 76507     | AOC1         | NM_029638_6_+1  |
| Plet1         | -4.981 | -4.981 | -1.260 | -1.372 | -3.226 | -4.333 | -4.210 | -4.883 | -3.738 | -4.981 | 76509     | PLET1        | NM_029639_9_+1  |
| Trappc9       | 1.297  | 0.749  | 1.459  | 1.581  | 0.716  | 0.994  | 1.428  | 1.555  | 2.733  | 2.497  | 76510     | TRAPPC9      | NM_029640_15_-1 |
| Slc52a2       | 4.477  | 4.278  | 4.295  | 4.124  | 3.986  | 3.952  | 3.490  | 2.970  | 3.251  | 2.566  | 52710     | SLC52A2      | NM_029643_15_+1 |
| Gatc          | 5.162  | 5.267  | 4.573  | 4.463  | 4.192  | 4.163  | 4.830  | 4.845  | 5.378  | 5.242  | 384281    | GATC         | NM_029645_5_-1  |
| Il34          | -1.541 | -1.786 | -4.980 | -4.980 | -4.981 | -4.981 | -4.980 | -4.979 | -4.981 | -4.981 | 76527     | IL34         | NM_029646_8_-1  |
| Fam204a       | 5.704  | 5.847  | 5.468  | 4.636  | 4.821  | 5.169  | 4.804  | 4.766  | 4.254  | 4.374  | 76539     | FAM204A      | NM_029648_19_-1 |
| Tmem101       | 3.918  | 3.744  | 3.659  | 4.044  | 3.495  | 3.775  | 3.338  | 3.842  | 3.772  | 3.684  | 76547     | TMEM101      | NM_029649_11_-1 |
| Klhl25        | -0.683 | -1.964 | -0.519 | 0.387  | -0.994 | 1.363  | 1.195  | 0.006  | 2.116  | 0.914  | 207952    | KLHL25       | NM_029652_7_+1  |
| Dapk1         | -1.178 | -4.526 | 3.352  | 4.883  | 1.637  | 3.206  | 3.559  | 4.571  | 2.849  | 4.369  | 69635     | DAPK1        | NM_029653_13_+1 |
| Atg2b         | 3.608  | 3.488  | 3.994  | 4.079  | 4.010  | 4.050  | 3.919  | 3.778  | 3.989  | 4.359  | 76559     | ATG2B        | NM_029654_12_-1 |
| Snx7          | 1.468  | 3.539  | 1.179  | 2.936  | 1.905  | 3.095  | 1.491  | 2.557  | 2.131  | 3.324  | 76561     | SNX7         | NM_029655_3_-1  |
| Mgrn1         | 5.178  | 5.376  | 5.813  | 5.868  | 5.541  | 5.179  | 5.698  | 5.973  | 6.323  | 6.564  | 17237     | MGRN1        | NM_029657_16_+1 |
| Rflnb         | -2.413 | -4.981 | -2.517 | -0.275 | -0.304 | 2.131  | -0.238 | 3.328  | 3.896  | 3.612  | 76566     | RFLNB        | NM_029658_11_-1 |
| Styxl1        | -4.779 | -2.681 | -3.482 | -4.944 | -3.871 | -4.891 | -4.573 | -4.984 | -4.981 | -4.981 | 76571     | STYXL1       | NM_029659_5_-1  |
| Mfsd2a        | -0.711 | -0.967 | 1.358  | 1.051  | 2.290  | 1.972  | 0.937  | -0.593 | -4.981 | -3.758 | 76574     | MFSD2A       | NM_029662_4_-1  |
| Eef1d         | -1.644 | -4.981 | -1.440 | -2.069 | -3.683 | -3.599 | -4.630 | -1.932 | -2.962 | -1.710 | 66656     | EEF1D        | NM_029663_15_-1 |
| Ipo11         | 4.055  | 4.198  | 3.461  | 3.990  | 4.063  | 3.959  | 4.042  | 4.044  | 3.853  | 4.273  | 76582     | IPO11        | NM_029665_13_-1 |
| Dnajc18       | 4.098  | 4.490  | 3.170  | 3.300  | 3.583  | 3.627  | 3.287  | 3.394  | 3.122  | 3.081  | 76594     | DNAJC18      | NM_029669_18_-1 |
| Immt          | 4.372  | 4.675  | 4.453  | 4.524  | 4.326  | 4.335  | 4.514  | 4.461  | 4.543  | 4.761  | 76614     | IMMT         | NM_029673_6_+1  |
| Fam65b        | 5.876  | 5.828  | 2.257  | 4.036  | 2.950  | 5.258  | 3.842  | 5.111  | 3.978  | 4.982  | 193385    | FAM65B       | NM_029679_13_+1 |
| Stambpl1      | 7.088  | 7.685  | 2.681  | 2.678  | 3.542  | 3.279  | 3.827  | 4.042  | 4.608  | 4.515  | 76630     | STAMBPL1     | NM_029682_19_+1 |
| Pkd1l2        | -2.355 | -2.895 | -3.216 | -2.526 | -2.129 | -2.346 | -1.315 | -2.615 | -0.264 | -0.926 | 76645     | PKD1L2       | NM_029686_8_-1  |
| Srxn1         | -0.935 | 0.658  | 2.188  | 2.896  | -0.282 | 0.483  | 1.471  | 1.968  | 2.300  | 2.796  | 76650     | SRXN1        | NM_029688_2_+1  |
| Actrt3        | 2.708  | 3.012  | -4.861 | -3.858 | -2.187 | -1.781 | -2.498 | -2.649 | -4.981 | -4.981 | 76652     | ACTRT3       | NM_029690_3_-1  |
| Spcs3         | 7.387  | 7.410  | 7.418  | 7.412  | 6.447  | 6.527  | 6.897  | 7.593  | 7.469  | 8.114  | 76687     | SPCS3        | NM_029701_8_-1  |
| Arfrp1        | 5.868  | 6.104  | 5.414  | 5.506  | 5.547  | 5.761  | 5.660  | 5.650  | 5.194  | 4.974  | 76688     | ARFRP1       | NM_029702_2_-1  |

|               |        |        |        |        |        |        |        |        |        |        |        |          |                  |
|---------------|--------|--------|--------|--------|--------|--------|--------|--------|--------|--------|--------|----------|------------------|
| Ttc19         | 0.437  | 2.212  | 0.762  | 1.609  | -0.417 | 1.150  | 1.071  | 0.908  | 1.002  | -0.131 | 72795  | TTC19    | NM_029704_11_+_1 |
| Atxn3         | 3.377  | 3.515  | 4.284  | 4.223  | 4.426  | 4.419  | 4.797  | 4.381  | 5.517  | 5.614  | 110616 | ATXN3    | NM_029705_12_-_1 |
| Cpb1          | -4.981 | -2.681 | -4.966 | -4.966 | -4.564 | -4.401 | -4.950 | -3.604 | -4.981 | -4.342 | 76703  | CPB1     | NM_029706_3_-_1  |
| Clasp1        | 1.847  | 1.844  | 1.104  | 2.063  | 1.129  | 0.825  | 0.087  | 1.487  | -2.610 | -1.800 | 76707  | CLASP1   | NM_029709_1_+_1  |
| Arpc2         | 9.363  | 9.430  | 10.608 | 10.780 | 10.135 | 10.068 | 10.043 | 10.222 | 10.429 | 10.376 | 76709  | ARPC2    | NM_029711_1_+_1  |
| Catsperg2     | -4.981 | -4.981 | -4.743 | -4.802 | -4.738 | -4.898 | -4.981 | -4.981 | -4.981 | -4.981 | 76718  | CATSPERG | NM_029714_7_-_1  |
| Chn1          | -4.981 | -4.981 | -4.970 | -4.747 | -4.984 | -4.633 | -4.952 | -4.715 | -4.981 | -4.981 | 108699 | CHN1     | NM_029716_2_-_1  |
| Creld2        | 7.701  | 8.023  | 6.442  | 6.981  | 5.666  | 5.839  | 5.495  | 6.491  | 4.343  | 5.215  | 76737  | CRELD2   | NM_029720_15_+_1 |
| Snx27         | 3.074  | 3.766  | 3.312  | 3.200  | 3.988  | 4.052  | 4.087  | 4.050  | 5.313  | 5.650  | 76742  | SNX27    | NM_029721_3_-_1  |
| Gje1          | -4.981 | -4.981 | -3.649 | -4.459 | -4.313 | -4.975 | -4.967 | -4.975 | -4.232 | -3.300 | 76743  | NA       | NM_029722_10_-_1 |
| Dapl1         | -1.215 | -4.981 | -4.511 | -0.519 | -3.903 | 0.065  | -1.741 | 1.165  | -2.834 | -2.429 | 76747  | DAPL1    | NM_029723_2_+_1  |
| Mospd2        | 1.945  | 2.457  | 5.321  | 5.126  | 3.633  | 3.840  | 3.866  | 4.089  | 4.743  | 4.843  | 76763  | MOSPD2   | NM_029730_X_-_1  |
| 2010005H15Rik | -4.981 | -4.981 | -4.970 | -4.970 | -3.867 | -5.004 | -4.466 | -4.982 | -4.981 | -4.981 | 76770  | CSTA     | NM_029733_16_+_1 |
| Wdyhv1        | 4.757  | 4.944  | 4.357  | 4.733  | 4.361  | 4.730  | 4.021  | 4.555  | 3.841  | 4.254  | 76773  | WDYHV1   | NM_029734_15_+_1 |
| Eprs          | 5.886  | 5.641  | 6.280  | 6.414  | 6.328  | 6.406  | 6.151  | 6.275  | 5.994  | 5.824  | 107508 | EPRS     | NM_029735_1_+_1  |
| Slc10a7       | 3.383  | 3.729  | 3.347  | 3.903  | 3.636  | 3.986  | 2.998  | 3.472  | 3.892  | 4.485  | 76775  | SLC10A7  | NM_029736_8_-_1  |
| Cluap1        | 5.125  | 4.954  | 3.841  | 3.395  | 4.276  | 4.584  | 3.806  | 3.663  | 3.460  | 3.390  | 76779  | CLUAP1   | NM_029738_16_+_1 |
| Ppfia3        | -4.981 | -4.981 | -2.869 | -2.376 | -0.067 | -1.704 | -1.637 | -3.521 | -4.394 | -3.481 | 76787  | PPFIA3   | NM_029741_7_-_1  |
| Klhdc10       | 3.978  | 4.042  | 4.165  | 4.257  | 4.272  | 3.980  | 4.226  | 4.215  | 4.872  | 4.979  | 76788  | KLHDC10  | NM_029742_6_+_1  |
| Tbc1d9b       | 4.572  | 4.641  | 4.772  | 5.008  | 4.498  | 5.072  | 5.156  | 5.176  | 5.827  | 5.663  | 76795  | TBC1D9B  | NM_029745_11_+_1 |
| Cog2          | 4.609  | 4.605  | 5.345  | 5.321  | 4.634  | 4.545  | 4.685  | 4.758  | 5.229  | 5.293  | 76332  | COG2     | NM_029746_8_+_1  |
| 2410137M14Rik | -4.981 | -4.981 | -1.891 | -2.009 | -4.881 | -4.988 | -4.964 | -4.951 | -4.981 | -4.981 | 76797  | NA       | NM_029747_17_-_1 |
| Tmem234       | 6.737  | 7.254  | 5.986  | 6.241  | 6.039  | 6.642  | 6.157  | 6.644  | 6.185  | 6.352  | 76799  | TMEM234  | NM_029748_4_+_1  |
| Usp42         | 3.753  | 3.589  | 3.853  | 3.529  | 4.244  | 4.179  | 3.920  | 3.711  | 3.487  | 3.896  | 76800  | USP42    | NM_029749_5_-_1  |
| Rpl18a        | 11.002 | 10.978 | 11.579 | 11.462 | 11.603 | 11.268 | 11.708 | 11.352 | 10.435 | 10.267 | 76808  | RPL18A   | NM_029751_8_-_1  |
| Bri3bp        | 7.201  | 7.373  | 7.229  | 7.410  | 7.075  | 7.180  | 6.852  | 6.330  | 6.672  | 5.975  | 76809  | BRI3BP   | NM_029752_5_+_1  |
| Sdccag8       | 5.518  | 5.025  | 5.876  | 5.142  | 6.162  | 5.804  | 6.152  | 5.308  | 5.952  | 5.263  | 76816  | SDCCAG8  | NM_029756_1_+_1  |
| Fam49a        | 3.958  | 3.320  | 6.326  | 6.714  | 8.260  | 8.560  | 7.448  | 7.361  | 6.724  | 7.226  | 76820  | FAM49A   | NM_029758_12_+_1 |
| Mtfr1l        | 6.470  | 6.334  | 6.076  | 5.895  | 6.231  | 5.880  | 6.098  | 5.634  | 6.118  | 5.380  | 76824  | MTFR1L   | NM_029759_4_-_1  |
| Nubpl         | 4.681  | 4.562  | 3.860  | 3.851  | 3.353  | 3.635  | 2.999  | 3.067  | 2.004  | 1.892  | 76826  | NUBPL    | NM_029760_12_+_1 |
| Hyls1         | 2.178  | 1.112  | 1.587  | 0.321  | 2.323  | 0.190  | 1.947  | -0.556 | 1.629  | 0.120  | 76832  | HYLS1    | NM_029762_9_-_1  |
| Polr3f        | 3.517  | 3.244  | 3.595  | 3.515  | 3.987  | 3.791  | 3.784  | 3.789  | 3.933  | 4.058  | 70408  | POLR3F   | NM_029763_2_+_1  |
| Dtl           | -0.034 | -2.311 | 3.175  | 3.332  | 3.819  | 2.822  | 3.327  | 2.876  | 1.912  | 0.199  | 76843  | DTL      | NM_029766_1_-_1  |
| Rps9          | 10.261 | 10.328 | 10.420 | 10.468 | 10.546 | 10.623 | 10.627 | 10.636 | 9.977  | 9.976  | 76846  | RP59     | NM_029767_7_+_1  |
| Gper1         | -4.981 | -4.981 | -4.952 | -4.952 | -4.910 | -4.174 | -3.834 | -4.944 | -0.934 | -4.342 | 76854  | GPER1    | NM_029771_5_+_1  |
| Catsper3      | -4.808 | -4.981 | -4.647 | -4.937 | -4.963 | -4.974 | -4.402 | -4.962 | -4.911 | -4.957 | 76856  | CATSPER3 | NM_029772_13_+_1 |
| Spopl         | 2.582  | 2.731  | 2.701  | 2.609  | 1.973  | 2.078  | 2.097  | 2.154  | 3.084  | 3.126  | 76857  | SPOPL    | NM_029773_2_-_1  |
| Ttll11        | -1.068 | -0.675 | -3.084 | -2.450 | -2.869 | -3.328 | -3.617 | -1.806 | -1.816 | -1.583 | 74410  | TTLL11   | NM_029774_2_-_1  |
| Dcun1d5       | 7.033  | 7.083  | 6.861  | 6.900  | 7.021  | 7.100  | 6.775  | 6.782  | 5.870  | 6.283  | 76863  | DCUN1D5  | NM_029775_9_+_1  |
| Rhbdd1        | 4.434  | 4.897  | 4.234  | 4.187  | 4.098  | 4.022  | 4.263  | 4.368  | 5.139  | 5.094  | 76867  | RHBDD1   | NM_029777_1_+_1  |
| Ccdc116       | -2.948 | -4.678 | -1.422 | -0.373 | -1.914 | -3.009 | -2.917 | -3.596 | -4.981 | -4.981 | 76872  | CCDC116  | NM_029779_16_-_1 |
| Raf1          | 5.859  | 5.939  | 6.030  | 6.002  | 6.121  | 6.054  | 6.508  | 6.401  | 7.439  | 6.964  | 110157 | RAF1     | NM_029780_6_-_1  |
| Rab36         | -0.034 | 2.017  | -2.033 | -1.354 | -2.083 | -1.558 | -0.789 | -0.117 | 4.206  | 3.516  | 76877  | RAB36    | NM_029781_10_+_1 |
| Calr3         | -1.564 | -4.765 | -4.880 | -4.045 | -2.907 | -4.028 | -4.291 | -4.194 | -3.750 | -4.981 | 73316  | CALR3    | NM_029782_8_-_1  |
| Fam81a        | -4.981 | -4.981 | -4.976 | -4.976 | -1.284 | -0.035 | -4.894 | -3.935 | -4.981 | -4.316 | 76886  | FAM81A   | NM_029784_9_-_1  |
| Pomgnt1       | -1.050 | 0.260  | -0.784 | -1.673 | -1.391 | -4.753 | -1.353 | -2.624 | -4.386 | -0.859 | 68273  | POMGNT1  | NM_029786_4_+_1  |
| Cyb5r3        | 6.539  | 6.324  | 7.634  | 7.834  | 8.555  | 8.658  | 7.781  | 7.471  | 6.477  | 6.143  | 109754 | NA       | NM_029787_15_-_1 |
| Rnft1         | 5.766  | 5.931  | 5.421  | 5.454  | 4.986  | 5.082  | 5.454  | 5.742  | 5.619  | 6.231  | 76892  | RNFT1    | NM_029788_11_+_1 |
| Cers2         | 7.700  | 7.711  | 7.011  | 6.937  | 6.977  | 7.030  | 7.233  | 7.540  | 8.167  | 8.101  | 76893  | CERS2    | NM_029789_3_+_1  |
| Mettl15       | 3.392  | 3.273  | 3.057  | 2.850  | 3.099  | 2.913  | 2.597  | 2.056  | 0.943  | 1.111  | 76894  | METTL15  | NM_029790_2_-_1  |
| Bicd2         | 0.889  | 1.670  | 2.886  | 3.277  | 3.121  | 3.670  | 3.063  | 3.635  | 4.040  | 4.693  | 76895  | BICD2    | NM_029791_13_+_1 |
| Golga1        | 3.128  | 3.441  | 2.844  | 3.174  | 3.273  | 3.025  | 3.243  | 3.088  | 3.643  | 3.891  | 76899  | GOLGA1   | NM_029793_2_-_1  |
| Cpsf4l        | -4.981 | -4.981 | -4.400 | -4.848 | -4.270 | -4.952 | -4.697 | -4.825 | -3.786 | -4.571 | 52670  | CPSF4L   | NM_029794_11_-_1 |
| Lrg1          | -0.722 | -4.981 | -4.777 | 1.355  | -3.825 | 2.169  | -1.476 | 3.355  | 3.135  | 2.563  | 76905  | LRG1     | NM_029796_17_-_1 |
| Mnd1          | -0.129 | -0.428 | -0.180 | 0.036  | 0.690  | 0.393  | -0.240 | -1.634 | -3.322 | -2.750 | 76915  | MND1     | NM_029797_3_-_1  |
| Flywch2       | 1.319  | 1.980  | 0.668  | 0.645  | -0.870 | 0.349  | 0.236  | -0.229 | -1.384 | -2.571 | 76917  | FLYWCH2  | NM_029798_17_-_1 |
| Tsacc         | 1.805  | 1.896  | -0.283 | -0.288 | 0.231  | 0.079  | 0.325  | 0.119  | 0.033  | -0.875 | 76927  | TSACC    | NM_029801_3_-_1  |
| Arfip2        | 3.879  | 3.543  | 4.371  | 4.313  | 3.692  | 3.723  | 3.551  | 3.595  | 4.000  | 3.714  | 76932  | ARFIP2   | NM_029802_7_-_1  |
| Ifi27l2a      | 9.285  | 7.975  | 5.032  | 3.193  | 8.028  | 6.263  | 8.943  | 7.949  | 9.905  | 8.350  | 76933  | NA       | NM_029803_12_-_1 |
| Hnrnpm        | 5.839  | 5.926  | 6.452  | 6.538  | 6.329  | 6.601  | 6.005  | 6.240  | 5.884  | 6.138  | 76936  | HNRNPM   | NM_029804_17_-_1 |
| Tsc22d4       | -4.981 | -4.981 | -1.847 | -1.422 | -0.707 | -2.678 | -1.652 | -1.301 | 0.047  | 0.632  | 78829  | TSC22D4  | NM_029805_5_+_1  |
| Rnf225        | -1.576 | -2.087 | -3.037 | -2.189 | -2.289 | -3.834 | -2.963 | -3.124 | -3.471 | -4.981 | 381845 | RNF225   | NM_029809_7_+_1  |
| Nt5c2         | 5.342  | 5.778  | 6.254  | 6.290  | 5.679  | 6.038  | 5.369  | 5.657  | 5.065  | 4.948  | 76952  | NT5C2    | NM_029810_19_-_1 |
| St5           | -3.349 | -2.236 | -2.315 | -1.583 | -3.071 | -1.785 | -2.192 | -0.572 | 0.970  | 0.364  | 76954  | ST5      | NM_029811_7_-_1  |
| Chmp5         | 7.023  | 7.301  | 6.799  | 7.083  | 6.742  | 7.057  | 6.625  | 6.707  | 6.268  | 6.843  | 76959  | CHMP5    | NM_029814_4_+_1  |
| Bcas1         | -3.883 | -3.479 | -4.444 | -4.661 | -4.576 | -4.849 | -4.270 | -4.769 | -4.269 | -4.605 | 76960  | BCAS1    | NM_029815_2_-_1  |
| 2700049A03Rik | 2.741  | 0.943  | 2.797  | 2.567  | 3.041  | 2.885  | 3.157  | 3.157  | 2.168  | 2.168  | 76967  | KIAA0586 | NM_029818_12_+_1 |
| Arxes2        | -2.443 | -0.333 | -3.265 | -1.776 | 1.599  | 1.176  | 0.605  | 0.134  | -4.981 | -3.498 | 76976  | NA       | NM_029823_X_+_1  |
| Scfd1         | 6.804  | 6.642  | 6.230  | 6.410  | 5.955  | 6.053  | 5.919  | 6.075  | 5.869  | 6.054  | 76983  | SCFD1    | NM_029825_12_+_1 |
| Hdhd2         | 4.328  | 4.554  | 4.549  | 4.790  | 4.600  | 4.476  | 4.208  | 4.132  | 3.910  | 3.919  | 76987  | HDHD2    | NM_029826_18_+_1 |
| Ddrgk1        | 6.826  | 6.846  | 5.496  | 5.486  | 5.836  | 5.990  | 6.009  | 5.953  | 5.786  | 5.389  | 77006  | DDRGK1   | NM_029832_2_-_1  |
| Ppp1r12c      | 4.633  | 4.764  | 6.282  | 5.964  | 7.030  | 6.849  | 7.206  | 6.964  | 7.360  | 7.084  | 232807 | PPP1R12C | NM_029834_7_-_1  |
| Ticrr         | -4.981 | -4.981 | 0.770  | 1.052  | 2.282  | 1.671  | 2.048  | 0.528  | 0.722  | -0.283 | 77011  | TICRR    | NM_029835_7_+_1  |
| Tsply2        | 4.332  | 4.617  | 3.471  | 3.744  | 4.209  | 4.322  | 3.864  | 3.702  | 3.100  | 3.210  | 52808  | TSPYL2   | NM_029836_X_-_1  |

|               |        |        |        |        |        |        |        |        |        |        |        |            |                 |
|---------------|--------|--------|--------|--------|--------|--------|--------|--------|--------|--------|--------|------------|-----------------|
| Trub1         | 2.447  | 2.019  | 2.938  | 1.719  | 2.824  | 2.086  | 2.781  | 1.347  | 1.703  | 0.902  | 72133  | TRUB1      | NM_029839_19_+1 |
| Tstd3         | 2.915  | 4.148  | 3.547  | 4.185  | 4.058  | 4.552  | 4.641  | 5.016  | 5.193  | 5.230  | 77032  | NA         | NM_029840_4_-1  |
| 2510039018Rik | 5.258  | 5.523  | 5.552  | 5.526  | 5.579  | 5.591  | 5.552  | 5.665  | 6.555  | 6.381  | 77034  | KIAA2013   | NM_029841_4_+1  |
| Kdm8          | 1.536  | 1.353  | 2.112  | 1.507  | 1.913  | 0.925  | 1.860  | 0.974  | 1.545  | 1.383  | 77035  | KDM8       | NM_029842_7_+1  |
| 1700109H08Rik | -1.784 | -4.981 | -2.859 | -4.977 | -3.521 | -4.577 | -3.197 | -4.944 | -1.717 | -4.981 | 77036  | NA         | NM_029843_5_+1  |
| Mrap          | 0.866  | -1.569 | -0.605 | -1.067 | 0.510  | -1.396 | 0.294  | 0.085  | -2.177 | -3.236 | 77037  | MRAP       | NM_029844_16_+1 |
| Atg16l1       | 1.622  | 3.319  | 3.145  | 3.271  | 3.020  | 2.932  | 2.695  | 2.425  | 3.252  | 3.592  | 77040  | ATG16L1    | NM_029846_1_+1  |
| Arsk          | 3.455  | 4.135  | 3.335  | 3.507  | 3.623  | 3.866  | 3.543  | 4.043  | 4.022  | 4.484  | 77041  | ARSK       | NM_029847_13_-1 |
| Bcl7a         | 3.450  | 2.828  | 1.161  | 0.893  | 2.046  | 2.229  | 1.426  | 1.241  | -1.884 | -1.085 | 77045  | BCL7A      | NM_029850_5_+1  |
| Dync2h1       | 2.665  | 2.782  | 2.029  | 1.218  | 2.124  | 2.045  | 1.324  | 1.563  | 2.117  | 2.295  | 110350 | DYNC2H1    | NM_029851_9_-1  |
| Cep83         | 4.049  | 4.233  | 4.968  | 4.829  | 5.057  | 5.174  | 4.833  | 4.600  | 4.195  | 4.340  | 77048  | CEP83      | NM_029852_10_+1 |
| Tmco4         | 1.779  | 1.745  | 3.392  | 3.347  | 3.569  | 2.995  | 3.278  | 3.390  | 3.952  | 3.428  | 77056  | TMCO4      | NM_029857_4_+1  |
| Ston1         | -2.948 | -2.060 | -4.899 | -4.717 | -2.857 | -4.615 | -3.377 | -3.464 | -3.043 | -4.981 | 77057  | STON1      | NM_029858_17_+1 |
| Cnrip1        | 1.683  | 1.208  | -2.885 | -2.554 | -1.588 | -1.858 | -1.391 | 0.048  | -1.488 | -1.767 | 380686 | CNRI1P     | NM_029861_11_+1 |
| Cacfd1        | 4.046  | 4.066  | 3.745  | 3.858  | 3.645  | 3.787  | 3.569  | 3.849  | 3.960  | 4.185  | 381356 | CACFD1     | NM_029862_2_+1  |
| Ocel1         | 5.313  | 5.393  | 3.274  | 3.422  | 3.824  | 4.013  | 3.482  | 3.566  | 3.742  | 3.407  | 77090  | OCEL1      | NM_029865_8_+1  |
| Gppbp11       | 4.537  | 4.686  | 4.852  | 4.861  | 4.867  | 4.888  | 4.869  | 4.422  | 4.642  | 4.906  | 77110  | GPPBP11    | NM_029868_4_+1  |
| Zkscan1       | -1.429 | 0.743  | -0.549 | -1.405 | -0.471 | -1.107 | -0.980 | 1.092  | -0.297 | 1.941  | 74570  | ZKSCAN1    | NM_029869_5_+1  |
| Crebrf        | 5.842  | 6.156  | 5.352  | 4.955  | 5.576  | 5.682  | 5.587  | 5.522  | 5.651  | 5.881  | 77128  | CREBRF     | NM_029870_17_+1 |
| Hnrnpa0       | 4.903  | 4.949  | 5.252  | 5.132  | 5.407  | 5.215  | 5.184  | 4.822  | 4.520  | 4.254  | 77134  | HNRNPA0    | NM_029872_13_-1 |
| Slc35e3       | 3.945  | 3.834  | 3.333  | 3.093  | 2.672  | 2.596  | 3.266  | 3.526  | 4.599  | 4.707  | 215436 | SLC35E3    | NM_029875_10_-1 |
| Tbcd          | 4.014  | 3.812  | 5.221  | 5.090  | 4.677  | 4.619  | 4.332  | 4.445  | 5.010  | 4.847  | 108903 | TBCD       | NM_029878_11_+1 |
| Rgs7bp        | 4.420  | 4.935  | 1.245  | 0.072  | -0.280 | -1.567 | 1.011  | -0.754 | -1.431 | -2.748 | 52882  | RG57BP     | NM_029879_13_-1 |
| Ptgr2         | 5.369  | 5.620  | 4.724  | 4.766  | 4.716  | 4.662  | 4.794  | 4.896  | 4.930  | 5.211  | 77219  | PTGR2      | NM_029880_12_+1 |
| Hgsnat        | 4.810  | 4.207  | 4.232  | 4.166  | 4.445  | 4.227  | 5.674  | 5.624  | 8.754  | 7.127  | 52120  | HGSNAT     | NM_029884_8_-1  |
| Gabpb2        | 4.052  | 3.629  | 4.170  | 4.078  | 4.369  | 4.213  | 3.895  | 3.900  | 3.213  | 4.327  | 213054 | GABPB2     | NM_029885_3_-1  |
| 9430038101Rik | 5.039  | 5.146  | 4.382  | 4.181  | 4.168  | 4.511  | 4.380  | 4.159  | 4.431  | 4.017  | 77252  | NA         | NM_029886_7_-1  |
| Yif1b         | 4.459  | 4.377  | 4.335  | 4.469  | 3.712  | 3.721  | 3.977  | 4.183  | 3.499  | 3.074  | 77254  | YIF1B      | NM_029887_7_+1  |
| Zfp142        | 2.679  | 2.156  | 2.691  | 3.080  | 3.037  | 2.982  | 2.723  | 2.538  | 3.284  | 3.386  | 77264  | ZNF142     | NM_029888_1_-1  |
| Nkrf          | 1.505  | 1.189  | 0.788  | 0.556  | 0.416  | 0.681  | 0.703  | 0.302  | 0.198  | 0.050  | 77286  | NKRF       | NM_029891_X_-1  |
| Fam162b       | -4.981 | -2.344 | -4.974 | -4.974 | -4.976 | -4.976 | -4.953 | -4.919 | -4.981 | -4.981 | 77296  | FAM162B    | NM_029894_10_-1 |
| Et14          | -4.981 | -4.196 | -4.973 | -4.751 | -4.983 | -4.828 | -4.980 | -4.932 | -4.779 | -4.757 | 208618 | KIAA1217   | NM_029895_2_+1  |
| Wdr82         | 5.151  | 5.280  | 5.086  | 5.043  | 5.029  | 5.135  | 4.777  | 5.081  | 4.528  | 4.823  | 77305  | WDR82      | NM_029896_9_+1  |
| C2cd5         | 3.582  | 2.456  | 3.616  | 3.417  | 3.810  | 3.565  | 3.649  | 3.022  | 4.147  | 3.926  | 74741  | C2CD5      | NM_029897_6_-1  |
| Ankrd55       | 1.219  | -4.981 | 1.659  | -1.953 | 2.438  | -1.050 | 2.515  | -3.515 | -2.630 | -2.088 | 77318  | ANKRD55    | NM_029898_13_+1 |
| C330018D20Rik | 4.389  | 4.669  | 3.677  | 4.128  | 3.845  | 4.164  | 3.756  | 3.640  | 2.598  | 3.347  | 77422  | C5orf63    | NM_029909_18_-1 |
| Kcnk10        | -1.665 | -2.160 | -2.818 | -2.291 | -4.020 | -4.883 | -4.908 | -4.420 | -4.981 | -4.981 | 77258  | KCNK10     | NM_029911_12_-1 |
| Tmem116       | 0.118  | -2.034 | -4.392 | -4.882 | -2.730 | -4.523 | -3.233 | -2.115 | -2.811 | -4.802 | 77462  | TMEM116    | NM_029912_5_+1  |
| Mtus2         | 2.484  | 0.406  | 0.481  | -2.235 | 0.729  | -2.380 | 0.672  | -4.678 | -0.147 | -4.981 | 77521  | MTUS2      | NM_029920_5_+1  |
| Parp6         | -1.032 | -0.436 | -1.740 | -2.435 | -4.574 | -3.161 | -3.464 | -3.816 | -2.280 | -1.210 | 67287  | PARP6      | NM_029922_9_+1  |
| Mbd5          | 2.415  | 2.864  | 3.005  | 3.217  | 3.370  | 3.256  | 2.723  | 2.349  | 2.947  | 2.903  | 109241 | MBD5       | NM_029924_2_+1  |
| Irak4         | 4.180  | 3.422  | 5.333  | 4.181  | 5.653  | 4.808  | 5.742  | 4.565  | 6.063  | 5.323  | 266632 | IRAK4      | NM_029926_15_+1 |
| Ptprb         | -1.467 | -4.981 | -3.472 | -3.429 | -4.980 | -2.194 | -4.958 | -2.240 | -4.981 | -4.981 | 19263  | PTPRB      | NM_029928_10_+1 |
| Vps33a        | 4.590  | 4.608  | 4.944  | 5.064  | 5.217  | 5.157  | 5.291  | 5.369  | 5.932  | 6.081  | 77573  | VPS33A     | NM_029929_5_-1  |
| Tcaf1         | -4.981 | -4.981 | -4.383 | -2.154 | -4.913 | -3.234 | -3.531 | -1.232 | -2.659 | 0.514  | 77574  | TCAF1      | NM_029930_6_-1  |
| Mllt3         | -4.981 | -4.890 | -4.974 | -1.461 | -4.650 | -0.568 | -4.320 | -0.192 | -4.981 | -3.610 | 70122  | MLLT3      | NM_029931_4_-1  |
| Spns3         | 8.021  | 8.011  | 3.648  | 4.096  | 7.049  | 7.138  | 5.953  | 4.928  | 1.834  | 2.042  | 77577  | SPNS3      | NM_029932_11_-1 |
| Bcl9          | 2.112  | 2.109  | 4.101  | 3.876  | 4.008  | 3.849  | 3.255  | 2.793  | 2.068  | 2.313  | 77578  | BCL9       | NM_029933_3_-1  |
| Mboat7        | 3.977  | 4.149  | 4.590  | 4.995  | 5.219  | 5.373  | 5.320  | 5.082  | 6.398  | 5.996  | 77582  | MBOAT7     | NM_029934_7_-1  |
| Chst15        | 4.572  | 4.535  | 4.183  | 4.008  | 4.803  | 4.196  | 4.218  | 3.386  | 2.478  | 1.625  | 77590  | CHST15     | NM_029935_7_-1  |
| Ddx10         | 4.707  | 4.654  | 4.391  | 4.563  | 4.400  | 4.411  | 4.718  | 4.636  | 4.635  | 4.432  | 77591  | DDX10      | NM_029936_9_-1  |
| Nup210l       | -0.860 | -1.314 | 0.437  | -1.702 | -0.723 | -4.024 | -1.984 | -4.909 | -2.340 | -4.227 | 77595  | NUP210L    | NM_029937_3_+1  |
| H2afv         | 7.121  | 7.106  | 6.510  | 6.198  | 7.081  | 6.750  | 7.110  | 6.546  | 5.388  | 5.459  | 77605  | H2AFV      | NM_029938_11_-1 |
| Preli2        | 1.192  | 3.549  | 4.032  | 3.782  | 0.669  | 1.654  | 1.410  | 2.540  | -0.146 | 1.207  | 77619  | PRELID2    | NM_029942_18_-1 |
| Apex2         | 2.999  | 3.238  | 3.392  | 3.395  | 3.120  | 3.052  | 2.368  | 2.882  | 2.627  | 2.840  | 77622  | APEX2      | NM_029943_X_-1  |
| Smpd4         | -0.486 | 0.811  | 0.767  | 0.697  | 0.186  | -1.683 | -0.833 | -0.837 | 1.116  | -0.786 | 77626  | SMPD4      | NM_029945_16_+1 |
| Prdm8         | -2.573 | -1.733 | -3.417 | -4.755 | -1.940 | -1.676 | -2.807 | -3.269 | -4.981 | -4.981 | 77630  | PRDM8      | NM_029947_5_+1  |
| Snappc3       | 4.400  | 4.794  | 4.953  | 4.863  | 4.526  | 4.619  | 4.152  | 4.344  | 3.438  | 3.889  | 77634  | SNAPC3     | NM_029949_4_+1  |
| C330007P06Rik | 4.913  | 4.710  | 4.309  | 4.311  | 3.867  | 3.930  | 4.334  | 4.520  | 4.975  | 5.172  | 77644  | CXorf56    | NM_029951_X_-1  |
| Zfp955a       | 3.381  | 3.163  | 3.237  | 3.448  | 2.855  | 3.232  | 3.248  | 3.735  | 3.643  | 4.197  | 77652  | NA         | NM_029952_17_-1 |
| Ccdc93        | -3.548 | 0.965  | 1.443  | 1.068  | -0.694 | 0.358  | 0.275  | 0.549  | -0.392 | 1.088  | 70829  | CCDC93     | NM_029955_1_+1  |
| Mmab          | 3.910  | 3.835  | 2.894  | 2.685  | 2.992  | 2.969  | 1.908  | 2.761  | 2.401  | 2.350  | 77697  | MMAB       | NM_029956_5_-1  |
| Lcn12         | -4.981 | -4.981 | -2.219 | -4.944 | -3.968 | -4.652 | -4.975 | -4.967 | -4.981 | -4.981 | 77701  | LCN12      | NM_029958_2_-1  |
| 9230104L09Rik | -4.981 | -4.981 | -4.975 | -2.012 | -4.961 | -4.187 | -4.972 | -4.023 | -4.981 | -4.981 | 77705  | NA         | NM_029960_2_-1  |
| Mrps5         | 5.190  | 4.806  | 4.857  | 5.083  | 4.640  | 4.799  | 4.483  | 4.704  | 4.027  | 3.586  | 77721  | MRPS5      | NM_029963_2_+1  |
| 6030468B19Rik | -0.498 | 0.321  | -1.410 | 0.167  | 1.111  | 2.444  | 1.165  | 1.649  | -4.394 | -1.513 | 77727  | C17orf99   | NM_029964_11_+1 |
| Rnf170        | 4.512  | 4.849  | 4.449  | 4.149  | 4.258  | 4.433  | 4.210  | 3.800  | 4.047  | 4.476  | 77733  | RNF170     | NM_029965_8_+1  |
| Adamtsl1      | -4.981 | -4.981 | -3.408 | -4.248 | -4.414 | -4.699 | -1.427 | -4.510 | -4.981 | -4.981 | 77739  | ADAMTSL1   | NM_029967_4_+1  |
| Ernm          | -3.563 | -4.981 | -4.668 | -4.238 | -4.031 | -4.471 | -4.188 | -4.903 | -4.260 | -4.179 | 77767  | ERNM       | NM_029972_2_-1  |
| Dcst1         | -2.030 | -1.594 | -3.105 | -3.368 | -3.344 | -3.825 | -3.559 | -3.843 | -2.684 | -2.138 | 77772  | DCST1      | NM_029974_3_-1  |
| Ulbp1         | -0.848 | -0.829 | 0.390  | 0.551  | 1.185  | 0.556  | -0.111 | -0.108 | -0.630 | -1.008 | 77777  | ULBP1      | NM_029975_10_-1 |
| Cdkn2aipnl    | 5.985  | 5.924  | 5.644  | 5.486  | 6.165  | 5.961  | 6.107  | 5.792  | 5.157  | 4.303  | 52626  | CDKN2AIPNL | NM_029976_11_+1 |
| Polq          | -4.827 | -4.744 | 0.730  | -1.466 | 0.852  | 0.366  | 0.081  | -2.074 | -4.734 | -1.506 | 77782  | POLQ       | NM_029977_16_+1 |
| Trim35        | 4.991  | 5.049  | 7.050  | 7.089  | 5.291  | 5.175  | 5.045  | 5.422  | 5.475  | 5.595  | 66854  | TRIM35     | NM_029979_14_+1 |

|               |        |        |        |        |        |        |        |        |        |        |        |            |                 |
|---------------|--------|--------|--------|--------|--------|--------|--------|--------|--------|--------|--------|------------|-----------------|
| Adamtsl2      | 0.256  | -0.716 | -4.972 | -4.972 | -1.166 | -2.485 | -4.931 | -4.557 | -4.981 | -4.981 | 77794  | ADAMTSL2   | NM_029981_2_+1  |
| Slia2         | 7.789  | 8.007  | 0.106  | 0.580  | -0.756 | 0.961  | -0.699 | 1.415  | -1.150 | -0.513 | 77799  | SLA2       | NM_029983_2_-1  |
| Lrrc42        | 3.049  | 3.008  | 4.091  | 4.199  | 3.665  | 3.790  | 3.631  | 3.615  | 2.852  | 3.657  | 77809  | LRRC42     | NM_029985_4_-1  |
| Pigh          | 5.305  | 5.462  | 4.327  | 4.488  | 4.311  | 4.374  | 4.441  | 3.971  | 4.263  | 3.956  | 110417 | PIGH       | NM_029988_12_-1 |
| Lhfp13        | -4.981 | -4.981 | -4.979 | -4.116 | -4.585 | -4.423 | -4.135 | -3.819 | -4.981 | -2.246 | 269629 | LHFPL3     | NM_029990_5_+1  |
| Tchp          | 3.712  | 3.806  | 2.804  | 3.021  | 3.244  | 3.623  | 3.262  | 3.172  | 3.131  | 2.803  | 77832  | TCHP       | NM_029992_5_+1  |
| 6030458C11Rik | 3.567  | 4.210  | 4.450  | 4.618  | 4.299  | 4.691  | 4.096  | 4.653  | 4.081  | 4.775  | 77877  | CSorf22    | NM_029998_15_-1 |
| Lbh           | 4.434  | 4.141  | 4.347  | 4.342  | 5.451  | 5.327  | 5.319  | 4.827  | 3.961  | 3.865  | 77889  | LBH        | NM_029999_17_+1 |
| Cryl1         | 4.714  | 4.551  | 4.409  | 4.682  | 4.967  | 5.011  | 4.887  | 4.744  | 4.972  | 4.623  | 68631  | CRYL1      | NM_030004_14_-1 |
| Cyp20a1       | 3.457  | 3.540  | 3.949  | 3.926  | 2.567  | 2.382  | 2.723  | 3.652  | 3.760  | 4.087  | 77951  | CYP20A1    | NM_030013_1_+1  |
| Hook1         | 1.418  | 2.622  | 2.434  | 3.023  | 2.675  | 2.947  | 0.525  | 1.446  | -1.438 | -3.098 | 77963  | HOOK1      | NM_030014_4_+1  |
| Trmt13        | 3.274  | 2.985  | 4.176  | 4.059  | 3.348  | 3.531  | 3.542  | 3.545  | 3.068  | 3.246  | 229780 | TRMT13     | NM_030016_3_-1  |
| Rdh12         | 4.205  | 4.142  | 1.370  | 1.093  | 1.668  | 1.912  | 1.272  | 1.614  | 1.155  | 1.519  | 77974  | RDH12      | NM_030017_12_+1 |
| Tmem50b       | 6.642  | 6.569  | 7.336  | 7.401  | 6.737  | 6.565  | 7.123  | 7.452  | 7.822  | 8.243  | 77975  | TMEM50B    | NM_030018_16_-1 |
| Grifin        | -2.026 | -1.961 | -0.372 | -0.313 | -1.701 | -0.335 | -4.131 | -3.507 | -4.190 | -3.758 | 77998  | NA         | NM_030022_5_-1  |
| Prr15         | -4.981 | -4.981 | -2.466 | -2.468 | -2.997 | -4.116 | -2.672 | -3.507 | -4.190 | -4.227 | 78004  | PRR15      | NM_030024_6_+1  |
| Ccdc150       | 0.879  | -1.124 | -0.791 | -2.556 | -1.452 | -2.354 | -2.791 | -4.792 | -3.043 | -2.696 | 78016  | CCDC150    | NM_030025_1_+1  |
| Mccc2         | 4.297  | 4.315  | 4.762  | 4.779  | 4.518  | 4.640  | 4.565  | 4.465  | 2.987  | 3.425  | 78038  | MCCC2      | NM_030026_13_-1 |
| Tmem190       | -4.981 | -4.981 | -3.960 | -2.905 | -4.962 | -4.505 | -2.369 | -3.116 | -4.981 | -3.855 | 78052  | TMEM190    | NM_030028_7_+1  |
| Golgb1        | 5.525  | 5.319  | 5.703  | 5.279  | 5.391  | 5.474  | 5.104  | 5.068  | 4.462  | 4.613  | 224139 | GOLGB1     | NM_030035_16_+1 |
| Mospd3        | 1.459  | 1.452  | 1.656  | 1.726  | 1.105  | 0.866  | 0.436  | 1.549  | 2.332  | 1.363  | 68929  | MOSPD3     | NM_030037_5_-1  |
| Dnajc21       | 4.927  | 5.258  | 4.722  | 4.570  | 4.706  | 4.784  | 4.619  | 4.514  | 4.288  | 4.054  | 78244  | DNAJC21    | NM_030046_15_-1 |
| Gsto2         | 0.129  | 1.292  | -3.706 | -4.659 | -3.995 | -3.262 | -3.404 | -2.425 | -3.300 | -4.947 | 68214  | GSTO2      | NM_030051_19_+1 |
| Trappc6b      | 6.963  | 6.976  | 6.334  | 6.213  | 6.474  | 6.433  | 6.259  | 6.193  | 5.751  | 5.805  | 78232  | TRAPPC6B   | NM_030057_12_-1 |
| Batf3         | 1.116  | 0.456  | 6.985  | 7.157  | 6.646  | 6.957  | 6.551  | 6.091  | 4.357  | 4.259  | 381319 | BATF3      | NM_030060_1_+1  |
| Acbd7         | -4.981 | -4.981 | -4.989 | -3.833 | -4.968 | -4.430 | -4.676 | -3.639 | -4.981 | -4.981 | 78245  | ACBD7      | NM_030063_2_+1  |
| Phf23         | 3.207  | 3.534  | 4.644  | 4.353  | 3.748  | 3.578  | 3.705  | 3.933  | 4.342  | 4.258  | 78246  | PHF23      | NM_030064_11_+1 |
| Armxc1        | -4.508 | -1.743 | -3.666 | -4.820 | -4.936 | -4.973 | -4.859 | -4.046 | -4.955 | -4.917 | 78248  | ARMXC1     | NM_030066_X_+1  |
| Adgrf4        | -4.981 | -4.981 | -4.930 | -4.975 | -4.764 | -4.959 | -4.857 | -4.977 | -4.742 | -4.981 | 78249  | ADGRF4     | NM_030067_17_-1 |
| Iqch          | -4.981 | -4.981 | 0.318  | 0.591  | -4.281 | -4.954 | -4.971 | -3.642 | -4.981 | -4.981 | 78250  | IQCH       | NM_030068_9_-1  |
| Nxpe2         | 1.788  | 1.962  | -2.798 | 1.874  | 0.573  | 2.515  | 0.136  | 2.502  | -2.739 | 0.508  | 78252  | NXPE2      | NM_030069_9_-1  |
| Lrrc9         | -3.038 | -0.306 | -4.918 | -2.597 | -3.554 | -4.035 | -4.840 | -4.824 | -4.981 | -4.981 | 78257  | NA         | NM_030070_12_+1 |
| Plb1          | -4.981 | -3.408 | -1.494 | -2.213 | -4.672 | -3.397 | -4.977 | -4.932 | -4.981 | -4.981 | 665270 | PLB1       | NM_030072_5_+1  |
| Zfp687        | 2.553  | 2.100  | 3.870  | 3.338  | 3.892  | 3.589  | 3.623  | 3.164  | 4.410  | 3.912  | 78266  | ZNF687     | NM_030074_3_-1  |
| Klhdc8b       | 0.732  | 1.219  | 1.449  | 1.814  | 3.159  | 3.403  | 1.552  | 1.750  | -0.450 | 0.496  | 78267  | KLHDC8B    | NM_030075_9_-1  |
| Creb3l4       | -4.941 | -4.862 | -4.747 | -4.960 | -4.962 | -4.978 | -4.981 | -4.980 | -4.770 | -4.332 | 78284  | CREB3L4    | NM_030080_3_-1  |
| Rbsn          | 3.619  | 3.491  | 3.829  | 3.418  | 4.016  | 3.398  | 3.860  | 3.393  | 5.110  | 4.651  | 78287  | RBSN       | NM_030081_6_-1  |
| Hist3h2ba     | 3.936  | -3.408 | 0.725  | -0.119 | 1.823  | 0.345  | 1.936  | -1.989 | -0.043 | -3.758 | 78303  | HIST1H2BD  | NM_030082_11_+1 |
| Naa38         | 6.134  | 5.920  | 6.187  | 6.002  | 5.594  | 5.634  | 5.986  | 5.688  | 5.074  | 4.870  | 78304  | NAA38      | NM_030083_11_+1 |
| Gpr108        | 6.211  | 6.355  | 5.530  | 5.708  | 5.559  | 5.667  | 5.629  | 5.886  | 6.519  | 6.518  | 78308  | GPR108     | NM_030084_17_-1 |
| Ndufv3        | 5.248  | 5.308  | 3.843  | 3.900  | 3.544  | 3.768  | 3.445  | 3.630  | 4.281  | 3.705  | 78330  | NDUFV3     | NM_030087_17_+1 |
| Ola1          | 4.204  | 4.113  | 2.320  | 2.245  | 2.551  | 2.431  | 1.890  | 2.023  | 1.713  | 1.648  | 67059  | OLA1       | NM_030091_2_-1  |
| Snrnp25       | 7.502  | 6.928  | 4.906  | 4.960  | 5.389  | 5.245  | 4.830  | 4.889  | 3.700  | 3.417  | 78372  | SNRNP25    | NM_030093_11_+1 |
| Nudt17        | 0.973  | -2.767 | 4.704  | 5.175  | 4.685  | 4.298  | 3.939  | 2.868  | 1.336  | 0.574  | 78373  | NUDT17     | NM_030094_3_-1  |
| Ddx52         | 5.499  | 5.483  | 5.584  | 5.510  | 5.549  | 5.485  | 5.473  | 5.499  | 5.710  | 5.528  | 78394  | DDX52      | NM_030096_11_+1 |
| Rnase6        | 11.069 | 11.258 | 9.367  | 9.241  | 8.346  | 8.900  | 8.191  | 8.342  | 7.973  | 7.001  | 78416  | RNASE6     | NM_030098_14_+1 |
| Pym1          | 1.605  | 1.372  | 1.132  | 1.060  | 1.318  | 0.556  | 1.583  | 0.910  | 2.064  | 1.785  | 78428  | PYM1       | NM_030100_10_+1 |
| Tmsb15a       | -4.981 | -4.981 | -4.954 | -4.954 | -4.920 | -4.324 | -4.970 | -4.734 | -4.981 | -4.342 | 78478  | NA         | NM_030106_X_-1  |
| Tmem33        | 3.483  | 3.640  | 1.920  | 1.815  | 2.260  | 1.958  | 2.128  | 2.397  | 3.062  | 2.078  | 67878  | TMEM33     | NM_030108_5_+1  |
| Sf3b2         | 6.908  | 6.972  | 7.667  | 7.598  | 7.881  | 7.764  | 7.750  | 7.496  | 7.849  | 7.513  | 319322 | SF3B2      | NM_030109_19_-1 |
| Micu3         | 1.955  | 2.743  | 2.265  | 0.583  | 1.565  | 1.412  | 0.648  | -0.017 | 0.947  | -0.417 | 78506  | MICU3      | NM_030110_8_+1  |
| Rtf1          | 6.282  | 6.439  | 5.508  | 5.658  | 6.015  | 6.207  | 6.108  | 5.904  | 4.844  | 4.923  | 76246  | RTF1       | NM_030112_2_+1  |
| Arhgap10      | 0.072  | -2.681 | -2.324 | -2.575 | -0.644 | -0.199 | 0.396  | -0.774 | 0.766  | 0.629  | 78514  | ARHGAP10   | NM_030113_8_-1  |
| Herc4         | -3.297 | -0.269 | 2.259  | 2.202  | 1.597  | 1.829  | 1.911  | 2.475  | 2.535  | 3.810  | 67345  | HERC4      | NM_030114_10_+1 |
| Mrpl9         | 5.346  | 5.426  | 5.053  | 5.151  | 4.882  | 4.874  | 4.862  | 5.079  | 4.923  | 4.841  | 78523  | MRPL9      | NM_030116_3_+1  |
| Asb8          | 3.656  | 4.452  | 3.274  | 2.966  | 2.789  | 2.077  | 3.391  | 2.993  | 3.975  | 3.698  | 78541  | ASB8       | NM_030121_15_-1 |
| Htra3         | -4.981 | -4.981 | -4.285 | -4.124 | -4.990 | -3.486 | -2.203 | 0.757  | -1.125 | 0.542  | 78558  | HTRA3      | NM_030127_5_-1  |
| Cnih4         | 6.539  | 6.541  | 6.932  | 6.851  | 6.457  | 6.375  | 7.005  | 6.758  | 6.150  | 6.182  | 98417  | CNIH4      | NM_030131_1_+1  |
| Utp23         | 5.086  | 5.093  | 4.574  | 4.504  | 4.521  | 4.240  | 4.432  | 4.252  | 4.296  | 4.014  | 78581  | UTP23      | NM_030132_15_+1 |
| Srbd1         | 2.851  | 2.521  | 2.778  | 2.536  | 3.349  | 2.917  | 3.017  | 2.339  | 2.453  | 2.102  | 78586  | SRBD1      | NM_030133_17_-1 |
| Cstad         | 0.156  | 0.268  | -1.893 | -4.707 | -0.281 | -0.513 | -0.981 | -2.127 | -2.126 | -4.342 | 78617  | NA         | NM_030137_2_+1  |
| Acap2         | 5.265  | 5.286  | 5.807  | 5.649  | 6.165  | 6.290  | 6.150  | 6.153  | 6.584  | 6.906  | 78618  | ACAP2      | NM_030138_16_-1 |
| Zfp449        | 1.729  | 1.700  | 0.052  | -0.145 | 0.098  | 0.050  | -1.180 | -0.962 | -0.434 | 0.959  | 78619  | ZNF449     | NM_030139_X_+1  |
| 1700061G19Rik | -4.981 | -4.981 | -3.348 | -4.024 | 0.503  | 1.637  | 1.130  | -0.840 | -0.614 | -1.782 | 78625  | NA         | NM_030141_17_+1 |
| Ddit4l        | -4.981 | -4.981 | -2.506 | -3.495 | -4.193 | -4.741 | -4.941 | -2.643 | -4.981 | -4.981 | 73284  | DDIT4L     | NM_030143_3_+1  |
| Lsm6          | 4.386  | 4.200  | 4.500  | 4.738  | 3.868  | 3.507  | 4.032  | 4.110  | 3.196  | 2.770  | 78651  | LSM6       | NM_030145_8_-1  |
| Brd8          | 3.568  | 4.154  | 4.603  | 4.313  | 4.392  | 3.899  | 3.599  | 3.862  | 4.887  | 4.866  | 78656  | BRD8       | NM_030147_18_-1 |
| Dhx58         | 4.907  | 4.409  | 5.841  | 5.566  | 6.179  | 5.388  | 6.089  | 5.663  | 6.873  | 6.132  | 80861  | DHX58      | NM_030150_11_-1 |
| Nol3          | -0.892 | 0.917  | -4.084 | -2.627 | -4.981 | -4.981 | -4.975 | -4.965 | -4.981 | -4.976 | 78688  | NOL3       | NM_030152_8_+1  |
| Naa35         | 4.799  | 4.815  | 5.185  | 5.267  | 4.682  | 4.672  | 4.667  | 4.537  | 4.292  | 4.604  | 78689  | NAA35      | NM_030153_13_+1 |
| Troap         | -2.878 | -3.035 | 0.821  | 0.806  | 2.493  | 0.828  | 1.362  | -1.013 | -0.898 | -3.510 | 78733  | TROAP      | NM_030159_15_+1 |
| Csgalnact2    | 4.231  | 4.261  | 5.403  | 5.234  | 6.180  | 6.376  | 6.357  | 5.922  | 6.930  | 7.299  | 78752  | CSGALNACT2 | NM_030165_6_-1  |
| Fam122b       | -1.607 | -0.341 | -0.967 | -3.796 | 1.089  | -0.688 | -0.767 | -0.514 | 0.619  | 0.697  | 78755  | FAM122B    | NM_030167_X_-1  |
| Rictor        | 5.661  | 5.724  | 5.973  | 5.788  | 6.246  | 6.320  | 5.767  | 5.743  | 5.193  | 5.306  | 78757  | RICTOR     | NM_030168_15_+1 |

|               |        |        |        |        |        |        |        |        |        |        |        |                |                  |
|---------------|--------|--------|--------|--------|--------|--------|--------|--------|--------|--------|--------|----------------|------------------|
| Efcab11       | -4.981 | -2.583 | 0.777  | 0.110  | 1.542  | 0.493  | 0.978  | -0.052 | 0.515  | -0.974 | 78767  | EFCAB11        | NM_030172_12_-_1 |
| Mctp1         | 1.169  | 0.781  | 6.852  | 6.954  | 4.948  | 5.339  | 4.982  | 4.981  | 5.521  | 5.660  | 78771  | MCTP1          | NM_030174_13_+_1 |
| Spata2l       | 2.696  | 2.951  | 3.019  | 2.682  | 2.086  | 2.141  | 2.371  | 2.640  | 3.484  | 3.296  | 78779  | SPATA2L        | NM_030176_8_-_1  |
| Brpf1         | 0.541  | 2.293  | 2.029  | 2.392  | 1.874  | 2.754  | 3.175  | 2.613  | 4.984  | 4.229  | 78783  | BRPF1          | NM_030178_6_+_1  |
| Usp54         | 1.317  | 1.860  | 1.458  | 1.664  | 0.947  | 1.280  | 0.310  | 0.946  | 0.564  | 1.086  | 78787  | USP54          | NM_030180_14_-_1 |
| Armc9         | -2.695 | -0.485 | -0.926 | -2.197 | 0.616  | 0.295  | 0.207  | 0.577  | -0.880 | -0.731 | 78795  | ARMC9          | NM_030184_1_+_1  |
| Zcchc4        | -0.283 | -0.741 | 1.309  | 0.943  | 0.122  | 0.368  | -0.880 | -0.882 | -0.732 | 0.260  | 78796  | ZCCHC4         | NM_030185_5_+_1  |
| Ak7           | -4.981 | -1.951 | -2.802 | -3.435 | -5.001 | -4.063 | -3.510 | -2.296 | -1.996 | -4.981 | 78801  | AK7            | NM_030187_12_+_1 |
| Ttc30a1       | 1.980  | 2.252  | 1.207  | 1.402  | 0.276  | 0.746  | -0.355 | 0.309  | 0.771  | 0.798  | 78802  | TTC30A         | NM_030188_2_-_1  |
| Stpg1         | -3.843 | -1.716 | -2.093 | -3.403 | -4.980 | -4.969 | -4.948 | -4.008 | -4.981 | -4.981 | 78806  | STPG1          | NM_030189_4_+_1  |
| 4930562C15Rik | -2.505 | -4.981 | -4.169 | -4.736 | -3.665 | -3.744 | -4.836 | -4.697 | -3.134 | -3.527 | 78809  | C16orf96       | NM_030192_16_+_1 |
| Sp110         | 7.441  | 7.501  | 7.363  | 7.153  | 7.361  | 7.481  | 7.037  | 7.262  | 7.279  | 7.189  | 109032 | SP110          | NM_030194_1_-_1  |
| Cacul1        | 4.454  | 3.984  | 4.855  | 4.242  | 4.496  | 3.912  | 4.615  | 3.704  | 4.721  | 4.091  | 78832  | CACUL1         | NM_030197_19_-_1 |
| Gins3         | 3.061  | 3.387  | 2.973  | 3.260  | 4.020  | 4.411  | 3.679  | 3.178  | 2.879  | 2.715  | 78833  | GINS3          | NM_030198_8_+_1  |
| Zfp623        | 3.292  | 3.105  | 3.070  | 3.143  | 3.002  | 3.174  | 3.264  | 3.027  | 3.467  | 3.714  | 78834  | ZNF623         | NM_030199_15_+_1 |
| Hspa13        | 4.595  | 4.814  | 4.254  | 4.062  | 3.785  | 3.977  | 3.955  | 4.231  | 3.748  | 5.062  | 110920 | HSPA13         | NM_030201_16_-_1 |
| Tsply4        | 5.244  | 4.594  | 2.132  | 2.156  | 2.979  | 2.768  | 2.402  | 2.437  | 1.933  | 1.418  | 72480  | TSPYL4         | NM_030203_10_+_1 |
| Coro7         | 6.014  | 5.712  | 6.246  | 6.401  | 5.493  | 5.021  | 5.974  | 6.342  | 7.006  | 6.773  | 78885  | CORO7 CORO7-PA | NM_030205_16_-_1 |
| Cygb          | -3.563 | -4.981 | -3.805 | 3.108  | 2.836  | 7.960  | 1.613  | 6.754  | -4.981 | 0.304  | 114886 | CYGB           | NM_030206_11_-_1 |
| Sfi1          | 4.015  | 4.162  | 4.756  | 4.785  | 4.343  | 5.186  | 3.963  | 4.644  | 3.917  | 4.436  | 78887  | SFI1           | NM_030207_11_-_1 |
| Trmt44        | 1.176  | 1.864  | 2.174  | 2.300  | 2.449  | 2.196  | 2.172  | 1.896  | 3.011  | 2.951  | 78890  | TRMT44         | NM_030208_5_-_1  |
| Crispld2      | -1.857 | -1.236 | 0.769  | 1.720  | 5.114  | 4.545  | 1.652  | 0.197  | 2.429  | 0.919  | 78892  | CRISPLD2       | NM_030209_8_+_1  |
| Aacs          | 5.647  | 5.936  | 4.666  | 4.605  | 3.805  | 3.889  | 4.188  | 4.764  | 5.673  | 5.721  | 78894  | AACS           | NM_030210_5_+_1  |
| Wrnip1        | 4.552  | 4.602  | 4.450  | 4.304  | 4.560  | 4.432  | 4.020  | 4.369  | 4.227  | 4.071  | 78903  | WRNIP1         | NM_030215_13_+_1 |
| Misp          | -3.563 | -4.981 | -2.835 | -4.958 | -3.919 | -4.915 | -4.887 | -4.938 | -2.384 | -2.452 | 78906  | MISP           | NM_030218_10_+_1 |
| Trim42        | -4.981 | -4.981 | -4.966 | -4.835 | -3.525 | -3.516 | -4.841 | -4.977 | -4.981 | -4.981 | 78911  | TRIM42         | NM_030219_9_-_1  |
| Sp2           | 2.038  | 2.049  | 1.817  | 2.308  | 3.204  | 2.969  | 2.910  | 2.139  | 3.307  | 3.272  | 78912  | SP2            | NM_030220_11_-_1 |
| Nadsyn1       | 3.299  | 3.036  | 2.893  | 2.879  | 2.953  | 3.216  | 2.247  | 2.757  | 2.427  | 2.600  | 78914  | NADSYN1        | NM_030221_7_-_1  |
| Fndc8         | -2.273 | -2.291 | -4.967 | -4.325 | -4.976 | -4.890 | -4.981 | -4.981 | -4.981 | -4.981 | 78919  | FNDC8          | NM_030224_11_+_1 |
| Dlst          | 6.604  | 6.713  | 6.381  | 6.477  | 6.889  | 7.062  | 6.677  | 6.807  | 7.121  | 7.073  | 78920  | DLST           | NM_030225_12_+_1 |
| 9130019O22Rik | 1.186  | 0.799  | 1.075  | 0.578  | -0.172 | 0.617  | 1.232  | 0.785  | 2.150  | 2.246  | 78921  | NA             | NM_030226_7_-_1  |
| Gas2l1        | -4.981 | -4.981 | -4.403 | -4.792 | -3.806 | -4.198 | -3.186 | -4.360 | -4.776 | -0.702 | 78926  | GAS2L1         | NM_030228_11_-_1 |
| Polr3h        | 4.606  | 4.786  | 3.553  | 3.428  | 3.391  | 3.371  | 3.084  | 3.446  | 2.184  | 1.666  | 78929  | POLR3H         | NM_030229_15_-_1 |
| Saal1         | 4.503  | 4.940  | 4.130  | 4.301  | 4.725  | 4.429  | 4.337  | 4.077  | 3.767  | 3.567  | 78935  | SAAL1          | NM_030233_7_-_1  |
| Wdr76         | 0.349  | 2.288  | 1.692  | 2.741  | 2.597  | 2.730  | 1.625  | 2.206  | -1.172 | 1.718  | 241627 | WDR76          | NM_030234_2_+_1  |
| Avl9          | 4.081  | 3.611  | 4.376  | 4.281  | 4.302  | 4.355  | 4.343  | 4.208  | 5.004  | 5.283  | 78937  | AVL9           | NM_030235_6_+_1  |
| Fbxo34        | 1.738  | 1.117  | 2.913  | 0.561  | 2.527  | 0.849  | 2.558  | -0.159 | 3.750  | 1.789  | 78938  | FBXO34         | NM_030236_14_+_1 |
| Dync1h1       | 6.101  | 5.913  | 6.251  | 6.138  | 6.635  | 6.382  | 6.394  | 6.169  | 6.342  | 6.494  | 13424  | DYNC1H1        | NM_030238_12_+_1 |
| Abcg3         | 4.207  | 3.794  | 7.747  | 7.465  | 7.820  | 7.933  | 7.720  | 7.543  | 4.588  | 5.608  | 27405  | NA             | NM_030239_5_-_1  |
| Pagr1a        | 6.077  | 6.037  | 5.454  | 5.388  | 5.888  | 5.928  | 5.620  | 5.492  | 5.036  | 5.058  | 67278  | PAGR1          | NM_030240_7_-_1  |
| Kmt5a         | 4.898  | 4.754  | 6.035  | 6.238  | 5.555  | 5.626  | 5.357  | 5.485  | 7.006  | 6.334  | 67956  | KMT5A          | NM_030241_5_+_1  |
| Rbm43         | 2.883  | 3.432  | 0.397  | 1.232  | 1.617  | 1.333  | 1.948  | 1.682  | 2.773  | 2.666  | 71684  | RBM43          | NM_030243_2_-_1  |
| Ier5l         | 3.383  | 2.705  | 2.532  | 1.525  | 2.510  | 1.627  | 2.222  | 1.535  | 2.440  | 2.022  | 72500  | IER5L          | NM_030244_2_-_1  |
| Tada1         | 6.243  | 6.167  | 5.760  | 5.790  | 6.295  | 6.494  | 5.819  | 5.612  | 5.276  | 5.565  | 27878  | TADA1          | NM_030245_1_+_1  |
| Dcaf4         | 4.392  | 4.211  | 3.332  | 3.576  | 3.767  | 3.779  | 3.334  | 3.062  | 2.086  | 2.769  | 73828  | DCAF4          | NM_030246_12_+_1 |
| Cdk5rap3      | 7.003  | 6.527  | 6.102  | 6.063  | 6.354  | 6.359  | 6.114  | 6.030  | 6.154  | 5.659  | 80280  | CDK5RAP3       | NM_030248_11_-_1 |
| Cttnbp2nl     | -3.313 | 0.511  | -0.093 | 0.288  | -1.567 | -1.068 | -1.340 | -0.934 | -3.259 | -0.651 | 80281  | CTTNBP2NL      | NM_030249_3_-_1  |
| Nus1          | 4.754  | 4.780  | 5.018  | 5.046  | 4.337  | 4.480  | 4.655  | 4.797  | 4.691  | 5.008  | 52014  | NUS1           | NM_030250_10_+_1 |
| Abtb1         | 5.470  | 5.614  | 4.648  | 4.609  | 4.621  | 4.898  | 4.995  | 5.099  | 7.043  | 6.231  | 80283  | ABTB1          | NM_030251_6_-_1  |
| Smim12        | 5.860  | 5.382  | 5.024  | 4.984  | 5.406  | 5.280  | 5.428  | 4.926  | 4.842  | 4.396  | 80284  | SMIM12         | NM_030252_4_+_1  |
| Parp9         | 5.689  | 5.536  | 5.756  | 5.467  | 6.162  | 5.581  | 5.974  | 5.558  | 6.449  | 6.073  | 80285  | PARP9          | NM_030253_16_+_1 |
| Tusc3         | 3.861  | 5.179  | 4.150  | 5.146  | 3.102  | 4.158  | 3.142  | 4.341  | 3.174  | 4.026  | 80286  | TUSC3          | NM_030254_8_+_1  |
| Apohec3       | 7.951  | 0.792  | 8.005  | 2.591  | 8.041  | 0.626  | 7.612  | 1.220  | 6.277  | 2.504  | 80287  | APOHEC3B       | NM_030255_15_+_1 |
| Bcl9l         | 0.752  | 0.950  | -0.531 | -0.679 | 2.387  | 1.852  | 1.655  | 0.954  | 2.202  | 1.828  | 80288  | BCL9L          | NM_030256_9_+_1  |
| Lysmd3        | 2.795  | 3.200  | 3.929  | 3.796  | 3.222  | 2.941  | 3.489  | 3.652  | 4.372  | 4.990  | 80289  | LYSMD3         | NM_030257_13_+_1 |
| Gpr146        | 6.107  | 6.300  | 4.864  | 4.496  | 4.369  | 4.301  | 4.690  | 5.144  | 5.296  | 5.514  | 80290  | GPR146         | NM_030258_5_+_1  |
| Rilpl2        | 8.660  | 8.718  | 5.702  | 5.562  | 6.266  | 7.174  | 5.406  | 5.708  | 5.834  | 5.492  | 80291  | RILPL2         | NM_030259_5_-_1  |
| Zxdc          | 1.972  | 2.310  | 1.900  | 1.445  | 1.588  | 1.548  | 1.611  | 1.729  | 2.075  | 2.414  | 80292  | ZXDC           | NM_030260_6_+_1  |
| Sesn3         | 2.472  | 2.501  | 2.063  | 2.443  | 2.960  | 2.925  | 2.176  | 1.768  | -0.177 | -0.293 | 75747  | SESN3          | NM_030261_9_+_1  |
| Pofut2        | 5.132  | 4.997  | 4.562  | 4.669  | 4.931  | 5.082  | 5.186  | 5.476  | 5.893  | 6.109  | 80294  | POFUT2         | NM_030262_10_+_1 |
| Psd3          | -2.435 | -0.044 | -1.804 | -3.072 | -4.813 | -3.906 | -2.116 | -4.191 | -3.659 | -1.995 | 234353 | PSD3           | NM_030263_8_-_1  |
| Kcnp14        | -4.562 | -4.699 | -4.882 | -4.949 | -4.955 | -4.966 | -4.894 | -4.972 | -4.694 | -4.927 | 80334  | KCNIP4         | NM_030265_5_-_1  |
| Inpp4a        | 5.585  | 4.622  | 3.485  | 3.451  | 3.398  | 2.752  | 3.204  | 3.656  | 2.448  | 4.701  | 269180 | INPP4A         | NM_030266_1_+_1  |
| Rab27b        | -4.336 | -4.981 | -4.928 | -0.807 | -4.350 | -4.457 | -2.619 | -2.423 | -3.549 | -4.824 | 80718  | RAB27B         | NM_030554_18_-_1 |
| Mynn          | 4.297  | 4.549  | 3.789  | 3.815  | 4.023  | 3.955  | 3.971  | 3.679  | 4.166  | 4.285  | 80732  | MYNN           | NM_030557_3_+_1  |
| Car15         | -0.632 | -1.138 | -2.198 | -1.394 | -2.319 | -4.101 | -1.691 | -1.699 | 0.109  | -0.158 | 80733  | NA             | NM_030558_16_-_1 |
| Vps16         | 5.439  | 5.540  | 5.727  | 5.741  | 6.052  | 5.818  | 5.976  | 5.904  | 6.177  | 5.684  | 80743  | VPS16          | NM_030559_2_+_1  |
| Cwc22         | 3.480  | 3.614  | 3.635  | 3.596  | 3.862  | 3.562  | 3.786  | 3.483  | 4.002  | 3.760  | 80744  | CWC22          | NM_030560_2_-_1  |
| BC004004      | 7.623  | 7.368  | 6.070  | 6.319  | 5.885  | 6.058  | 5.981  | 6.268  | 6.167  | 5.793  | 80748  | C6orf89        | NM_030561_17_+_1 |
| Lrfn1         | -4.981 | -4.981 | -3.531 | -4.537 | -3.385 | -4.436 | -2.671 | -3.057 | -1.277 | -3.195 | 80749  | LRFN1          | NM_030562_7_+_1  |
| N4bp1         | 3.863  | 3.398  | 4.751  | 4.602  | 4.658  | 4.780  | 5.229  | 5.157  | 6.283  | 6.252  | 80750  | N4BP1          | NM_030563_8_-_1  |
| Rnf34         | 6.222  | 6.512  | 5.795  | 5.699  | 5.696  | 5.642  | 5.618  | 5.559  | 5.774  | 5.420  | 80751  | RNF34          | NM_030564_5_+_1  |
| Fam20c        | -2.027 | 0.860  | -2.697 | -1.206 | -3.973 | -3.983 | 1.380  | 1.554  | 5.374  | 5.244  | 80752  | FAM20C         | NM_030565_5_+_1  |
| Rabep2        | 5.466  | 5.557  | 5.298  | 5.425  | 5.162  | 5.704  | 4.892  | 5.323  | 4.883  | 4.985  | 70314  | RABEP2         | NM_030566_7_+_1  |

|          |        |        |        |        |        |        |        |        |        |        |        |              |                 |
|----------|--------|--------|--------|--------|--------|--------|--------|--------|--------|--------|--------|--------------|-----------------|
| Nbea     | -4.981 | -2.997 | -3.549 | 0.026  | -1.229 | 3.367  | -4.807 | -1.845 | -4.981 | -1.767 | 26422  | NBEA         | NM_030595_3_-1  |
| Lsm2     | -1.427 | -1.537 | 0.641  | 0.288  | 0.469  | -0.061 | 0.215  | -1.082 | -0.678 | -2.016 | 27756  | LSM2         | NM_030597_17_+1 |
| Rcan2    | 1.057  | 1.939  | -4.963 | -4.980 | -4.893 | -4.965 | -4.980 | -4.956 | -4.981 | -4.981 | 53901  | RCAN2        | NM_030598_17_+1 |
| Klrb1b   | -1.884 | -3.408 | -0.476 | 1.711  | 0.186  | 2.059  | 2.693  | 5.144  | -1.155 | -2.910 | 80782  | KLRB1        | NM_030599_6_-1  |
| C1ca3a2  | -4.981 | -3.408 | -4.955 | -4.955 | -4.859 | -4.830 | -4.935 | -4.958 | -4.981 | -4.981 | 80797  | NA           | NM_030601_3_-1  |
| Hist1h1a | -1.025 | -2.895 | -0.410 | -0.788 | -0.067 | -0.598 | -0.347 | -1.930 | -1.403 | -1.454 | 80838  | NA           | NM_030609_13_+1 |
| Nfkbi2   | -3.788 | -0.723 | -3.620 | -2.372 | -0.744 | -2.694 | -1.729 | -1.573 | 0.156  | 0.048  | 80859  | NFKBIZ       | NM_030612_16_-1 |
| Krit1    | 4.984  | 4.439  | 4.337  | 3.596  | 4.229  | 2.806  | 4.119  | 3.539  | 3.609  | 4.023  | 79264  | KRIT1        | NM_030675_5_+1  |
| Gys1     | 2.113  | 2.565  | 4.140  | 4.461  | 3.100  | 3.494  | 2.739  | 3.315  | 3.799  | 3.382  | 14936  | GYS1         | NM_030678_7_+1  |
| Upf1     | 2.930  | 3.418  | 4.692  | 4.138  | 4.701  | 4.362  | 4.094  | 4.692  | 5.946  | 5.831  | 19704  | UPF1         | NM_030680_8_-1  |
| Tlr1     | -0.168 | -0.156 | 1.936  | 3.946  | 6.211  | 5.985  | 6.117  | 5.753  | 4.384  | 5.356  | 21897  | TLR1         | NM_030682_5_-1  |
| Trim34a  | 5.470  | 5.373  | 5.649  | 4.521  | 6.398  | 5.181  | 6.038  | 4.496  | 5.208  | 4.535  | 94094  | TRIM6-TRIM34 | NM_030684_7_+1  |
| Serp1    | 10.946 | 10.831 | 9.467  | 9.347  | 8.684  | 8.833  | 9.334  | 9.675  | 10.405 | 10.421 | 28146  | SERP1        | NM_030685_3_-1  |
| Dhrs4    | 2.341  | 1.844  | 2.268  | 2.162  | 2.052  | 1.387  | 2.238  | 1.917  | 1.901  | 1.634  | 28200  | DHRS4        | NM_030686_14_+1 |
| Nptxr    | -4.981 | -4.981 | -4.755 | -1.036 | -1.551 | -3.922 | -3.276 | -1.074 | -4.967 | -1.286 | 73340  | NPTXR        | NM_030689_15_-1 |
| Rai14    | -3.932 | -3.781 | -4.217 | -4.477 | -4.539 | -4.812 | -4.054 | -4.208 | -3.551 | -3.339 | 75646  | RAI14        | NM_030690_15_-1 |
| Igsf6    | 2.840  | 1.221  | 6.497  | 6.299  | 7.713  | 7.996  | 8.549  | 8.759  | 9.299  | 9.766  | 80719  | IGSF6        | NM_030691_7_-1  |
| Sacm1l   | 5.033  | 5.316  | 5.938  | 5.934  | 5.457  | 5.464  | 5.424  | 5.627  | 5.515  | 6.225  | 83493  | SACM1L       | NM_030692_9_+1  |
| Atf5     | -0.466 | -0.036 | -1.632 | -1.337 | -2.830 | -1.963 | -0.789 | -1.570 | -4.365 | -0.520 | 107503 | ATF5         | NM_030693_7_-1  |
| Ifitm2   | 3.722  | 1.891  | 6.980  | 6.336  | 8.029  | 8.039  | 9.291  | 9.459  | 9.985  | 9.973  | 80876  | IFITM2       | NM_030694_7_-1  |
| Lrba     | 3.440  | 3.194  | 3.828  | 3.632  | 4.290  | 3.829  | 3.324  | 2.644  | 0.509  | 1.821  | 80877  | LRBA         | NM_030695_3_+1  |
| Slc16a3  | -2.427 | -1.505 | -1.268 | -1.039 | 1.893  | 1.163  | 2.870  | 2.666  | 5.201  | 4.643  | 80879  | SLC16A3      | NM_030696_11_+1 |
| Kank3    | 1.215  | 1.177  | 1.905  | 1.736  | 1.975  | 1.769  | 2.781  | 2.982  | 3.896  | 3.771  | 80880  | KANK3        | NM_030697_17_+1 |
| Maged2   | -2.262 | 0.759  | -3.244 | -0.243 | -3.444 | -3.483 | -3.712 | 0.810  | -3.747 | -0.365 | 80884  | MAGED2       | NM_030700_X_-1  |
| Hcar2    | 1.542  | -0.422 | 0.491  | 1.374  | 3.334  | 3.140  | 4.374  | 4.638  | 2.882  | 2.758  | 80885  | HCAR2        | NM_030701_5_-1  |
| Senp3    | 2.126  | 2.426  | 2.282  | 2.751  | 2.398  | 3.183  | 2.670  | 2.098  | 3.615  | 3.045  | 80886  | SENP3        | NM_030702_11_-1 |
| Cpn1     | 2.122  | 2.146  | -1.630 | -0.404 | -0.069 | 0.226  | -0.684 | -0.985 | -4.981 | -0.781 | 93721  | CPN1         | NM_030703_19_-1 |
| Mesdc1   | 2.235  | 1.840  | 3.550  | 3.491  | 2.125  | 1.489  | 3.041  | 2.986  | 4.521  | 3.982  | 80889  | MESDC1       | NM_030705_7_-1  |
| Trim2    | -4.248 | -4.981 | -4.081 | -4.576 | -1.290 | -4.107 | -1.911 | -1.586 | -3.953 | -4.981 | 80890  | TRIM2        | NM_030706_3_-1  |
| Fcrls    | -4.981 | -4.981 | -4.981 | -4.981 | -4.981 | -4.981 | -1.280 | -4.013 | -1.871 | -2.993 | 80891  | NA           | NM_030707_3_-1  |
| Slamf6   | 7.295  | 7.163  | 4.152  | 4.095  | 5.637  | 5.214  | 4.880  | 5.331  | 1.316  | 2.410  | 30925  | SLAMF6       | NM_030710_1_+1  |
| Erap1    | 4.950  | 5.238  | 6.258  | 6.289  | 5.804  | 5.776  | 5.699  | 5.724  | 6.001  | 6.194  | 80898  | ERAP1        | NM_030711_13_+1 |
| Cxcr6    | 1.144  | -0.315 | -0.026 | 1.454  | -0.019 | 1.381  | -0.264 | 1.949  | -1.828 | -0.433 | 80901  | CXCR6        | NM_030712_9_+1  |
| Zfp202   | 3.134  | 3.073  | 1.408  | 1.234  | 1.612  | 1.720  | 1.230  | 1.214  | 2.365  | 1.648  | 80902  | ZNF202       | NM_030713_9_+1  |
| Dtx3     | 5.213  | 4.766  | 3.915  | 3.955  | 4.478  | 4.476  | 3.621  | 3.677  | 3.819  | 3.897  | 80904  | DTX3         | NM_030714_10_-1 |
| Polh     | -0.447 | -0.625 | 1.528  | -0.589 | 1.504  | 0.585  | 1.106  | -0.572 | 0.997  | -0.517 | 80905  | POLH         | NM_030715_17_-1 |
| Kcnip2   | -4.900 | -4.981 | -4.938 | -3.834 | -4.971 | -4.980 | -4.961 | -4.978 | -4.959 | -4.975 | 80906  | KCNIP2       | NM_030716_19_-1 |
| Lactb    | 5.509  | 5.274  | 5.506  | 5.545  | 6.450  | 6.652  | 6.111  | 5.893  | 5.305  | 5.613  | 80907  | LACTB        | NM_030717_9_-1  |
| Gatsl2   | 2.487  | 2.169  | 2.704  | 3.079  | 3.793  | 3.268  | 3.628  | 2.510  | 3.662  | 3.936  | 80909  | GATSL2       | NM_030719_5_+1  |
| Gpr84    | -3.189 | -4.981 | -3.731 | -4.083 | -2.102 | -1.209 | 0.498  | 1.397  | 1.819  | 2.761  | 80910  | GPR84        | NM_030720_15_-1 |
| Acox3    | 5.002  | 5.089  | 7.368  | 7.213  | 5.723  | 5.913  | 5.814  | 6.010  | 7.252  | 7.213  | 80911  | ACOX3        | NM_030721_5_+1  |
| Pum1     | 3.575  | 3.684  | 4.507  | 4.305  | 4.251  | 4.115  | 3.328  | 4.535  | 4.506  | 4.884  | 80912  | PUM1         | NM_030722_4_+1  |
| Pum2     | 1.418  | -2.659 | -0.184 | -3.240 | -1.208 | -1.736 | 1.129  | -4.174 | -0.400 | 1.307  | 80913  | PUM2         | NM_030723_12_+1 |
| Uck2     | 4.165  | 4.167  | 4.700  | 4.885  | 4.468  | 4.553  | 4.282  | 4.682  | 2.301  | 2.452  | 80914  | UCK2         | NM_030724_1_-1  |
| Nckipsd  | 5.561  | 4.929  | 5.723  | 5.541  | 4.056  | 3.591  | 4.068  | 4.381  | 5.359  | 5.053  | 80987  | NCKIPSD      | NM_030729_9_+1  |
| Rad54l2  | 3.354  | 3.339  | 1.891  | 2.522  | 1.757  | 2.497  | 1.627  | 1.139  | 1.822  | 1.516  | 81000  | RAD54L2      | NM_030730_9_-1  |
| Trim23   | 2.702  | 3.270  | 2.962  | 2.881  | 2.600  | 2.593  | 2.517  | 2.248  | 3.252  | 3.200  | 81003  | TRIM23       | NM_030731_13_+1 |
| Tbl1xr1  | 5.563  | 5.908  | 6.029  | 6.160  | 6.178  | 6.097  | 6.172  | 6.196  | 6.683  | 7.148  | 81004  | TBL1XR1      | NM_030732_3_+1  |
| Vmn1r65  | -4.981 | -4.981 | -4.289 | -4.410 | -4.831 | -4.912 | -4.820 | -4.794 | -4.981 | -4.227 | 81013  | NA           | NM_030738_7_-1  |
| Vmn1r58  | -0.631 | -0.851 | -0.319 | -0.409 | -0.048 | -0.951 | -0.720 | -1.249 | -0.146 | -0.154 | 81014  | NA           | NM_030739_7_-1  |
| Rnf114   | 6.837  | 6.990  | 6.876  | 6.887  | 7.928  | 7.678  | 7.583  | 7.388  | 7.728  | 7.369  | 81018  | RNF114       | NM_030743_2_+1  |
| Btln4    | -4.981 | -4.981 | -4.588 | -4.370 | -4.972 | -4.972 | -4.978 | -4.661 | -4.981 | -4.981 | 632126 | NA           | NM_030746_17_-1 |
| Sil1     | 6.595  | 5.926  | 5.115  | 4.800  | 4.499  | 4.297  | 4.646  | 4.375  | 4.440  | 3.711  | 81500  | SIL1         | NM_030749_18_-1 |
| Sgpp1    | 6.377  | 6.175  | 6.678  | 6.567  | 6.300  | 6.204  | 6.481  | 6.625  | 7.467  | 7.925  | 81535  | SGPP1        | NM_030750_12_-1 |
| Pacsin3  | -3.238 | -3.583 | -2.385 | -2.058 | -3.925 | -4.626 | -3.668 | -4.149 | -4.574 | -4.465 | 80708  | PAC3IN3      | NM_030880_2_+1  |
| Ankrd17  | 2.761  | 4.115  | 3.528  | 3.421  | 3.801  | 3.845  | 3.409  | 2.646  | 4.007  | 3.566  | 81702  | ANKRD17      | NM_030886_5_-1  |
| Jdp2     | -0.422 | -0.354 | 4.397  | 4.134  | 3.079  | 2.595  | 2.356  | 1.640  | 3.228  | 1.825  | 81703  | JDP2         | NM_030887_12_+1 |
| Sorcs2   | -1.170 | -1.463 | -4.981 | -4.981 | -3.712 | -4.167 | -4.974 | -3.877 | -4.981 | -4.981 | 81840  | SORCS2       | NM_030889_5_-1  |
| Prrt1    | 1.871  | 1.966  | 1.961  | 1.724  | -0.546 | -2.578 | -0.373 | -1.019 | -2.060 | -2.128 | 260297 | NA           | NM_030890_17_+1 |
| Ide      | 4.987  | 5.217  | 5.073  | 5.295  | 4.838  | 5.094  | 5.121  | 5.260  | 5.241  | 5.516  | 15925  | IDE          | NM_031156_19_-1 |
| Ank1     | -4.866 | -4.045 | -4.902 | -4.801 | -4.926 | -4.971 | -4.812 | -4.728 | -4.795 | -4.678 | 11733  | ANK1         | NM_031158_8_+1  |
| Apoec1   | 0.833  | 2.035  | -2.751 | 1.244  | 1.691  | 4.558  | 2.780  | 6.020  | 4.266  | 7.500  | 11810  | APOEC1       | NM_031159_6_-1  |
| Col2a1   | -4.981 | -4.981 | -4.954 | -4.979 | -4.902 | -4.977 | -4.981 | -4.978 | -4.879 | -4.981 | 12824  | COL2A1       | NM_031163_15_-1 |
| Hspa8    | 9.568  | 9.451  | 11.100 | 10.489 | 11.084 | 10.153 | 10.780 | 10.352 | 10.607 | 10.547 | 15481  | HSPA8        | NM_031165_9_+1  |
| Il1rn    | -4.981 | -4.981 | -4.134 | -1.448 | -4.693 | -4.883 | -2.104 | -0.880 | -4.086 | -4.634 | 16181  | IL1RN        | NM_031167_2_+1  |
| Il6      | -4.981 | -1.314 | 1.170  | 1.639  | 1.152  | 2.193  | 3.921  | -0.030 | 0.427  | 0.202  | 16193  | IL6          | NM_031168_5_+1  |
| Kcnmb1   | -4.981 | -4.981 | -3.677 | -4.602 | -2.413 | -3.794 | -4.588 | -4.978 | -3.043 | -4.227 | 16533  | KCNMB1       | NM_031169_11_+1 |
| Krt8     | -4.981 | -4.981 | -2.661 | -2.327 | -2.045 | 0.091  | -2.811 | -3.155 | -1.533 | -4.981 | 16691  | KRT8         | NM_031170_15_-1 |
| Trim17   | -4.981 | -3.408 | -2.970 | -4.705 | -4.277 | -4.861 | -3.136 | -4.588 | -1.254 | -4.316 | 56631  | TRIM17       | NM_031172_11_+1 |
| Cacnb1   | -0.688 | -4.216 | -2.714 | -0.191 | -0.222 | -1.351 | 0.270  | 0.253  | 0.496  | 0.547  | 12295  | CACNB1       | NM_031173_11_-1 |
| Dscam    | -2.164 | -4.981 | -0.143 | -1.281 | 6.507  | 6.223  | 4.383  | 2.475  | -2.121 | -2.232 | 13508  | DSCAM        | NM_031174_16_-1 |
| Tnxb     | -4.981 | -2.681 | -4.254 | -4.796 | -1.491 | -0.901 | -2.195 | -3.144 | -2.709 | -2.750 | 81877  | TNXB         | NM_031176_17_+1 |
| Ift122   | 0.839  | -0.853 | 0.517  | 0.573  | 0.144  | -1.339 | 0.614  | -0.334 | 0.507  | 1.082  | 81896  | IFT122       | NM_031177_6_+1  |
| Tlr9     | 3.390  | 2.826  | 1.833  | 1.818  | 2.243  | 2.557  | 2.225  | 2.235  | 1.813  | 1.970  | 81897  | TLR9         | NM_031178_9_+1  |

|          |        |        |        |        |        |        |        |        |        |        |        |               |                 |
|----------|--------|--------|--------|--------|--------|--------|--------|--------|--------|--------|--------|---------------|-----------------|
| Sf3b1    | 8.131  | 8.163  | 8.874  | 8.666  | 9.199  | 8.924  | 8.946  | 8.768  | 9.193  | 9.218  | 81898  | SF3B1         | NM_031179_1_-1  |
| Klb      | -4.981 | -4.981 | -4.981 | -4.981 | -4.204 | -3.621 | -4.981 | -4.981 | -2.015 | -2.747 | 83379  | KLB           | NM_031180_5_+1  |
| Siglece  | 1.468  | 0.146  | 1.193  | 1.658  | 5.107  | 5.207  | 4.948  | 5.261  | 4.800  | 5.356  | 83382  | SIGLEC9       | NM_031181_7_-1  |
| Tfap4    | 0.520  | 0.102  | -0.696 | -1.277 | -0.160 | -1.525 | -0.097 | -1.468 | -0.149 | -1.036 | 83383  | TFAP4         | NM_031182_16_-1 |
| Sp6      | -0.798 | -1.952 | -4.559 | -3.771 | -2.371 | -2.785 | -3.371 | -3.123 | -4.394 | -4.981 | 83395  | SP6           | NM_031183_11_+1 |
| Glis2    | 0.105  | 0.177  | 0.217  | -0.719 | 2.022  | 1.164  | 1.589  | -0.340 | -1.256 | -1.080 | 83396  | GLIS2         | NM_031184_16_+1 |
| Akap12   | 2.005  | -0.019 | -1.316 | -4.284 | -0.510 | -1.181 | -0.616 | 1.054  | 0.738  | 1.796  | 83397  | AKAP12        | NM_031185_10_+1 |
| Msr1     | -0.019 | -4.981 | -0.354 | -0.544 | -0.130 | -0.263 | 3.999  | 5.210  | 7.012  | 7.798  | 20288  | MSR1          | NM_031195_8_-1  |
| Slc19a1  | 2.498  | 2.405  | 1.787  | 2.484  | 1.474  | 2.192  | 0.929  | 2.683  | 2.221  | 2.374  | 20509  | SLC19A1       | NM_031196_10_+1 |
| Tfec     | -1.618 | -1.053 | -1.419 | -0.968 | 0.584  | -0.452 | 1.832  | 1.999  | 2.629  | 3.335  | 21426  | TFEC          | NM_031198_6_-1  |
| Tgfa     | -1.412 | -0.864 | -4.981 | -4.981 | -4.971 | -4.795 | -4.765 | -4.827 | -4.981 | -4.981 | 21802  | TGFA          | NM_031199_6_+1  |
| Tsta3    | 6.019  | 5.660  | 6.250  | 6.226  | 5.515  | 5.309  | 5.289  | 5.328  | 4.962  | 4.753  | 22122  | TSTA3         | NM_031201_15_-1 |
| Gimap3   | 1.770  | 0.689  | -0.047 | 1.078  | 0.557  | 1.911  | 2.191  | 3.754  | 0.989  | 0.089  | 83408  | GIMAP1-GIMAP5 | NM_031247_6_-1  |
| Lamtor2  | 7.262  | 7.094  | 6.854  | 6.874  | 6.547  | 6.678  | 7.046  | 6.945  | 6.340  | 6.257  | 83409  | LAMTOR2       | NM_031248_3_-1  |
| Cstf2t   | 4.534  | 4.624  | 4.628  | 4.711  | 4.541  | 4.743  | 4.774  | 4.484  | 5.462  | 5.607  | 83410  | CSTF2T        | NM_031249_19_+1 |
| Ctns     | 3.777  | 4.421  | 4.321  | 4.299  | 4.022  | 4.510  | 5.024  | 4.813  | 4.937  | 4.939  | 83429  | CTNS          | NM_031251_11_-1 |
| Il23a    | -4.981 | -4.981 | -4.877 | -3.385 | -4.156 | -2.495 | -3.439 | -4.886 | -3.925 | -4.981 | 83430  | IL23A         | NM_031252_10_-1 |
| Trem2    | -4.981 | -4.981 | -4.753 | -2.489 | -4.917 | -2.321 | -0.269 | 2.500  | 4.871  | 5.428  | 83433  | TREM2         | NM_031254_17_+1 |
| Plekha3  | 5.032  | 5.272  | 5.016  | 5.105  | 5.325  | 5.297  | 5.336  | 5.169  | 5.195  | 5.345  | 83435  | PLEKHA3       | NM_031256_2_+1  |
| Plekha2  | 5.612  | 5.936  | 6.431  | 6.461  | 6.065  | 6.126  | 5.924  | 6.395  | 6.695  | 6.931  | 83436  | PLEKHA2       | NM_031257_8_-1  |
| Nxf2     | -3.677 | -3.889 | -4.846 | -4.790 | -4.504 | -4.895 | -4.388 | -4.686 | -4.650 | -4.512 | 83454  | NXF2 NXF2B    | NM_031259_X_-1  |
| Bglap3   | -0.197 | -0.204 | -4.808 | -4.706 | -4.713 | -4.966 | -4.981 | -4.981 | -4.981 | -4.981 | 12095  | BGLAP         | NM_031368_3_-1  |
| Ogfr     | 5.800  | 5.580  | 6.096  | 6.010  | 5.942  | 5.550  | 6.057  | 5.904  | 7.157  | 6.612  | 72075  | OGFR          | NM_031373_2_+1  |
| Tex15    | -4.981 | -2.160 | -0.899 | -1.564 | 1.749  | 2.284  | -0.207 | 0.415  | -0.728 | -1.380 | 104271 | TEX15         | NM_031374_8_+1  |
| Ngrn     | 5.278  | 5.894  | 4.110  | 4.853  | 4.120  | 4.944  | 4.375  | 4.844  | 3.968  | 4.502  | 83485  | NGRN          | NM_031375_7_+1  |
| Pik3ap1  | 5.617  | 5.261  | 5.897  | 5.587  | 6.116  | 5.594  | 5.988  | 5.786  | 6.591  | 6.095  | 83490  | PIK3AP1       | NM_031376_19_-1 |
| Tktl1    | -1.455 | -4.981 | 1.447  | 1.536  | -3.080 | -3.141 | -3.262 | -3.877 | -2.747 | -4.227 | 83553  | TKTL1         | NM_031379_X_+1  |
| Fstl3    | 4.954  | 4.760  | -2.929 | -2.241 | -2.556 | -1.814 | -1.153 | 0.176  | 0.798  | 1.259  | 83554  | FSTL3         | NM_031380_10_+1 |
| Tex14    | -2.375 | -2.756 | -0.037 | -2.113 | -0.524 | -0.025 | -0.100 | -1.195 | -0.066 | 0.133  | 83560  | TEX14         | NM_031386_11_+1 |
| Gtf2a1   | 4.967  | 4.843  | 5.792  | 5.866  | 6.249  | 6.063  | 5.939  | 5.315  | 4.897  | 5.500  | 83602  | GTF2A1        | NM_031391_12_-1 |
| Wdr6     | 4.045  | 3.955  | 5.217  | 5.479  | 5.434  | 5.578  | 4.456  | 4.486  | 3.069  | 3.162  | 83669  | WDR6          | NM_031392_9_-1  |
| Sytl1    | 3.655  | 3.983  | -3.095 | -1.468 | -2.827 | -0.801 | -1.036 | 0.576  | -0.186 | -0.565 | 269589 | SYTL1         | NM_031393_4_-1  |
| Sytl2    | -4.981 | -4.981 | -4.981 | -4.981 | -4.966 | -4.817 | -3.051 | -4.927 | -4.981 | -4.981 | 83671  | SYTL2         | NM_031394_7_+1  |
| Sytl3    | 0.098  | -2.681 | -3.800 | -3.387 | -4.568 | -2.204 | 1.736  | -0.780 | -4.981 | -4.981 | 83672  | SYTL3         | NM_031395_17_+1 |
| Cnnm1    | -4.981 | -4.981 | 0.666  | 1.533  | -4.633 | -4.956 | -4.983 | -4.036 | -4.981 | -4.342 | 83674  | CNNM1         | NM_031396_19_+1 |
| Crispld1 | -3.028 | -4.981 | -0.193 | -1.972 | -3.163 | -4.113 | -4.962 | -4.527 | -4.981 | -4.981 | 83691  | CRISPLD1      | NM_031402_1_+1  |
| Dbr1     | 3.972  | 3.293  | 4.529  | 3.975  | 3.936  | 3.183  | 3.893  | 3.247  | 3.501  | 3.099  | 83703  | DBR1          | NM_031403_9_+1  |
| Srrt     | 4.871  | 4.811  | 5.430  | 5.580  | 5.424  | 5.584  | 5.257  | 4.940  | 4.830  | 4.719  | 83701  | SRRT          | NM_031405_5_-1  |
| Slc12a9  | 4.347  | 3.931  | 5.699  | 5.123  | 4.756  | 4.106  | 5.011  | 4.619  | 5.994  | 5.405  | 83704  | SLC12A9       | NM_031406_5_-1  |
| Gigyf1   | 2.894  | 2.817  | 3.419  | 2.775  | 3.260  | 2.855  | 3.290  | 2.994  | 3.497  | 3.383  | 57330  | GIGYF1        | NM_031408_5_+1  |
| Zfp275   | 0.785  | 0.849  | -0.294 | 0.924  | 0.785  | -0.751 | 0.669  | 0.397  | 0.724  | 1.956  | 27081  | ZNF275        | NM_031494_X_+1  |
| Smarcd1  | 3.212  | 3.210  | 3.225  | 3.112  | 3.860  | 3.715  | 3.769  | 3.222  | 3.545  | 3.306  | 83797  | SMARCD1       | NM_031842_15_+1 |
| Dpp7     | 4.814  | 6.109  | 4.829  | 6.217  | 3.506  | 4.637  | 3.712  | 5.076  | 3.223  | 4.520  | 83768  | DPP7          | NM_031843_2_-1  |
| Cenpq    | 5.150  | 5.365  | 3.371  | 3.348  | 3.975  | 3.756  | 3.745  | 3.634  | 2.664  | 2.063  | 83815  | CENPQ         | NM_031863_17_-1 |
| Tas1r1   | -4.981 | -2.681 | -2.921 | -2.192 | -4.481 | -4.960 | -3.504 | -2.981 | -3.373 | -2.910 | 110326 | TAS1R1        | NM_031867_4_-1  |
| Ppp1ca   | 9.441  | 9.370  | 9.618  | 9.692  | 9.503  | 9.393  | 9.461  | 9.737  | 9.900  | 9.836  | 19045  | PPP1CA        | NM_031868_19_+1 |
| Prkab1   | 4.786  | 4.720  | 4.329  | 4.595  | 4.608  | 4.509  | 4.680  | 4.975  | 5.339  | 5.221  | 19079  | PRKAB1        | NM_031869_5_-1  |
| Msh4     | -4.474 | -3.611 | -4.935 | -4.974 | -4.976 | -4.981 | -4.980 | -4.981 | -4.981 | -4.981 | 55993  | MSH4          | NM_031870_3_-1  |
| Ghdc     | 2.624  | 3.237  | 1.110  | 1.458  | 1.299  | 1.592  | 1.019  | 1.286  | 2.208  | 2.416  | 80860  | GHDC          | NM_031871_11_-1 |
| Tas1r3   | -4.981 | 0.156  | -0.137 | -0.798 | -1.225 | -2.120 | -1.358 | -1.247 | -0.055 | -0.975 | 83771  | TAS1R3        | NM_031872_4_-1  |
| Rab3d    | 5.327  | 5.331  | 3.310  | 3.006  | 2.930  | 2.111  | 3.957  | 3.406  | 6.788  | 5.083  | 19340  | RAB3D         | NM_031874_9_-1  |
| Otof     | -4.402 | -4.981 | -4.936 | -4.825 | -4.957 | -4.977 | -4.547 | -4.960 | -4.756 | -4.121 | 83762  | OTOF          | NM_031875_5_-1  |
| Smarcd2  | 5.385  | 5.245  | 5.649  | 5.786  | 5.929  | 5.828  | 5.899  | 5.856  | 6.138  | 6.261  | 83796  | SMARCD2       | NM_031878_11_-1 |
| Tnk1     | -4.981 | -4.981 | -4.739 | -3.624 | -4.938 | -4.206 | -4.945 | -4.825 | -4.981 | -4.088 | 83813  | TNK1          | NM_031880_11_-1 |
| Nedd4l   | -0.260 | -1.410 | -0.135 | -3.248 | -0.533 | -2.514 | -0.611 | -2.414 | -1.479 | -1.390 | 83814  | NEDD4L        | NM_031881_18_+1 |
| Tmem2    | -2.116 | 0.624  | -1.465 | -1.568 | -1.045 | -4.521 | -1.602 | -2.188 | 0.599  | -4.027 | 83921  | TMEM2         | NM_031997_19_+1 |
| Cep41    | 2.647  | 2.871  | 1.950  | 1.955  | 2.165  | 1.904  | 1.797  | 1.983  | 0.207  | 1.033  | 83922  | CEP41         | NM_031998_6_-1  |
| Gpr137b  | 6.767  | 6.803  | 6.320  | 6.311  | 5.240  | 5.543  | 5.337  | 5.216  | 4.742  | 4.523  | 83924  | GPR137B       | NM_031999_13_-1 |
| Trps1    | 0.062  | 0.883  | 4.021  | 3.792  | 5.786  | 5.518  | 5.560  | 5.404  | 5.579  | 6.286  | 83925  | TRPS1         | NM_032000_15_-1 |
| Nrg4     | 1.132  | 0.739  | -0.583 | -1.518 | 1.477  | 1.086  | -0.349 | -1.255 | 0.030  | -0.602 | 83961  | NRG4          | NM_032002_9_-1  |
| Enpp5    | 3.427  | 3.544  | 3.930  | 3.535  | -0.533 | 0.867  | 1.117  | -0.460 | -4.666 | -4.669 | 83965  | ENPP5         | NM_032003_17_+1 |
| Tssk6    | 1.009  | 0.797  | 0.636  | 0.535  | 1.173  | 0.978  | 0.756  | 0.335  | 2.023  | 1.234  | 83984  | TSSK6         | NM_032004_8_+1  |
| Slmap    | 2.782  | 4.068  | 3.972  | 3.783  | 3.824  | 4.414  | 3.772  | 4.018  | 4.573  | 4.738  | 83997  | SLMAP         | NM_032008_14_-1 |
| Map1a    | -4.981 | -4.981 | -4.968 | -4.941 | -4.203 | -4.921 | -4.973 | -4.802 | -4.540 | -4.630 | 17754  | MAP1A         | NM_032393_2_+1  |
| Kremen1  | 3.292  | 2.953  | 2.450  | 2.401  | 2.246  | 2.450  | 2.551  | 2.790  | 4.552  | 4.812  | 84035  | KREMEN1       | NM_032396_11_-1 |
| Kcnn1    | -3.843 | -4.981 | 0.299  | -0.513 | -0.737 | -1.265 | -2.539 | -2.052 | -3.750 | -3.166 | 84036  | KCNN1         | NM_032397_8_-1  |
| Plvap    | 2.934  | 1.095  | 1.411  | 1.518  | 0.443  | 1.903  | -1.096 | 2.802  | -0.837 | -0.989 | 84094  | PLVAP         | NM_032398_8_-1  |
| Sucnr1   | -4.981 | -1.589 | -2.293 | -3.382 | 5.691  | 5.975  | 4.100  | 2.208  | -3.925 | -4.981 | 84112  | SUCNR1        | NM_032400_3_+1  |
| Dmpk     | -4.124 | -1.186 | -1.968 | -3.044 | -0.806 | -2.843 | -1.533 | -2.887 | -2.038 | -4.647 | 13400  | DMPK          | NM_032418_7_+1  |
| Gpank1   | 4.624  | 4.168  | 3.824  | 3.657  | 4.033  | 3.812  | 4.138  | 3.787  | 4.074  | 3.753  | 81845  | GPANK1        | NM_032460_17_+1 |
| Cd96     | 3.986  | 4.235  | 0.198  | 0.554  | 0.465  | 1.920  | -0.713 | 2.194  | -2.029 | -2.152 | 84544  | CD96          | NM_032465_16_-1 |
| Kel      | -4.981 | 1.139  | -2.846 | 2.265  | -1.671 | 2.273  | -2.156 | 2.013  | -1.538 | 0.364  | 23925  | KEL           | NM_032540_6_-1  |
| Rnf123   | 5.132  | 5.115  | 5.907  | 5.822  | 5.643  | 5.558  | 5.002  | 5.076  | 5.428  | 5.078  | 84585  | RNF123        | NM_032543_9_-1  |
| Gtpbp3   | 2.538  | 2.649  | 1.656  | 1.679  | 2.042  | 2.005  | 1.981  | 1.940  | 1.938  | 1.950  | 70359  | GTPBP3        | NM_032544_8_+1  |

|             |        |        |        |        |        |        |        |        |        |        |        |          |                 |
|-------------|--------|--------|--------|--------|--------|--------|--------|--------|--------|--------|--------|----------|-----------------|
| Cdo1        | -0.956 | 0.216  | -1.924 | -1.131 | -3.333 | -0.030 | -2.003 | -1.510 | -0.674 | -1.589 | 12583  | CDO1     | NM_033037_18_-1 |
| Hes7        | -2.413 | -2.437 | -1.291 | -1.505 | -3.672 | -4.063 | -2.171 | -3.571 | -3.153 | -3.191 | 84653  | HES7     | NM_033041_11_+1 |
| Tnfrsf25    | -2.075 | -0.840 | -2.824 | -2.310 | -1.303 | -0.334 | -2.701 | -0.742 | -2.780 | -2.883 | 85030  | TNFRSF25 | NM_033042_4_+1  |
| Mbd6        | 2.754  | 2.868  | 3.131  | 3.254  | 3.731  | 3.701  | 3.735  | 3.128  | 3.444  | 3.249  | 110962 | MBD6     | NM_033072_10_-1 |
| Krt7        | -4.981 | -1.314 | 0.938  | 0.227  | 0.329  | -0.883 | 0.988  | 0.687  | 1.411  | 0.578  | 110310 | KRT7     | NM_033073_15_+1 |
| Tars        | 4.994  | 5.149  | 5.819  | 5.886  | 5.511  | 5.589  | 5.590  | 5.875  | 5.677  | 5.752  | 110960 | TARS     | NM_033074_15_-1 |
| D17H6S56E-5 | 3.186  | 1.852  | 3.269  | 3.109  | 3.399  | 2.793  | 3.190  | 3.010  | 3.200  | 2.539  | 110956 | NA       | NM_033075_17_-1 |
| Klrk1       | 1.161  | 1.296  | 5.179  | 5.671  | 4.209  | 5.917  | 5.370  | 5.121  | 1.717  | -1.402 | 27007  | NA       | NM_033078_6_-1  |
| M1ap        | 0.461  | 0.145  | 1.845  | 2.441  | 2.414  | 2.969  | 2.553  | 2.245  | 1.610  | 0.566  | 110958 | M1AP     | NM_033079_6_+1  |
| Nudt19      | 7.190  | 6.546  | 4.615  | 4.459  | 4.261  | 4.615  | 4.717  | 4.632  | 4.312  | 4.107  | 110959 | NUDT19   | NM_033080_7_-1  |
| Inpp5e      | 3.178  | 2.650  | 3.127  | 3.095  | 3.515  | 3.432  | 3.430  | 3.604  | 4.183  | 3.884  | 64436  | INPP5E   | NM_033134_2_-1  |
| Sept8       | -0.694 | 1.236  | -3.889 | -2.595 | -0.653 | -0.160 | 0.825  | -2.995 | 0.314  | 0.972  | 20362  | SEPT8    | NM_033144_11_+1 |
| Emc9        | 4.975  | 4.935  | 3.486  | 3.440  | 3.410  | 3.565  | 3.788  | 3.884  | 3.282  | 3.309  | 85308  | EMC9     | NM_033146_14_-1 |
| B3galt5     | 2.298  | 1.381  | -4.821 | -4.973 | -4.981 | -4.981 | -4.684 | -3.893 | -4.981 | -4.981 | 93961  | B3GALT5  | NM_033149_16_+1 |
| Snurf       | -2.086 | -2.261 | -4.144 | -4.714 | -3.726 | -2.357 | -3.816 | -2.708 | -4.981 | -4.981 | 84704  | SNURF    | NM_033174_7_-1  |
| Ngfr        | -4.981 | -4.981 | -1.238 | -3.913 | -4.886 | -4.598 | -4.243 | -4.587 | -3.247 | -4.981 | 18053  | NGFR     | NM_033217_11_-1 |
| Srebfb2     | 6.667  | 6.674  | 6.922  | 6.746  | 7.467  | 7.547  | 6.709  | 6.473  | 6.338  | 6.261  | 20788  | SREBF2   | NM_033218_15_+1 |
| Arpp21      | -0.828 | -0.598 | -4.870 | -4.882 | -4.969 | -4.969 | -4.981 | -4.981 | -4.981 | -4.981 | 74100  | ARPP21   | NM_033264_9_-1  |
| Actn2       | -4.981 | -4.981 | -4.287 | -3.587 | -4.945 | -1.915 | -4.596 | -2.268 | -4.981 | -4.981 | 11472  | ACTN2    | NM_033268_13_-1 |
| Chrm3       | -4.981 | 0.056  | -3.526 | -1.242 | -4.976 | -4.749 | -2.266 | -1.549 | -0.080 | 1.018  | 12671  | CHRM3    | NM_033269_13_-1 |
| E2f6        | 3.062  | 2.876  | 2.234  | 3.251  | 2.543  | 2.783  | 2.576  | 3.059  | 3.121  | 2.702  | 50496  | E2F6     | NM_033270_12_+1 |
| Slco2a1     | -3.349 | -1.104 | -2.729 | -0.927 | -2.690 | -3.713 | -4.323 | -2.710 | -2.598 | -4.981 | 24059  | SLCO2A1  | NM_033314_9_+1  |
| Glce        | 4.702  | 4.374  | 6.008  | 5.431  | 2.629  | 2.642  | 2.520  | 3.287  | 3.809  | 4.185  | 93683  | GLCE     | NM_033320_9_-1  |
| P2rx5       | -4.981 | -2.997 | 3.604  | 2.969  | 2.203  | 2.729  | 2.862  | 2.169  | -3.738 | -2.795 | 94045  | P2RX5    | NM_033321_11_+1 |
| Lztf11      | 5.371  | 4.998  | 5.422  | 5.524  | 4.878  | 5.333  | 4.884  | 4.747  | 4.317  | 4.940  | 93730  | LZTF11   | NM_033322_9_-1  |
| Dgcr8       | 2.369  | 2.692  | 3.135  | 3.042  | 3.216  | 3.107  | 3.109  | 3.429  | 3.624  | 3.554  | 94223  | DGCR8    | NM_033324_16_-1 |
| Loxl2       | 0.677  | 1.492  | 1.975  | 1.602  | 1.694  | 2.258  | 1.829  | 2.137  | 1.070  | 0.970  | 94352  | LOXL2    | NM_033325_14_+1 |
| Sec16b      | -4.981 | -3.902 | -4.969 | -4.973 | -4.923 | -4.975 | -4.773 | -4.916 | -4.394 | -4.588 | 89867  | SEC16B   | NM_033354_1_+1  |
| Copb1       | 6.394  | 6.662  | 6.707  | 7.005  | 6.718  | 6.660  | 6.781  | 6.926  | 7.264  | 7.524  | 70349  | COPB1    | NM_033370_7_-1  |
| Ppp1r16a    | 3.622  | 3.407  | 3.874  | 3.736  | 4.207  | 4.311  | 3.813  | 3.749  | 3.827  | 3.807  | 73062  | PPP1R16A | NM_033371_15_+1 |
| Dock2       | 6.866  | 6.632  | 7.615  | 7.843  | 7.914  | 7.913  | 7.967  | 8.029  | 8.885  | 8.843  | 94176  | DOCK2    | NM_033374_11_-1 |
| Jmjd6       | 5.509  | 5.816  | 5.342  | 5.623  | 5.465  | 5.847  | 5.356  | 5.615  | 5.276  | 5.221  | 107817 | JMJD6    | NM_033398_11_-1 |
| Clic1       | 9.019  | 9.017  | 9.251  | 9.294  | 9.374  | 9.317  | 9.171  | 9.245  | 9.053  | 8.885  | 114584 | CLIC1    | NM_033444_17_+1 |
| Arvcf       | -4.618 | -4.512 | -3.361 | -2.562 | -4.906 | -4.003 | -4.735 | -4.558 | -4.873 | -4.970 | 11877  | ARVCF    | NM_033474_16_+1 |
| Rab34       | -4.981 | -4.981 | -1.461 | -1.084 | -2.135 | -3.205 | -4.225 | -1.868 | -2.927 | -4.342 | 19376  | RAB34    | NM_033475_11_+1 |
| Tfcp2       | 1.959  | 2.474  | 0.732  | 1.720  | 1.448  | 1.511  | 1.157  | 1.285  | 1.599  | 1.674  | 21422  | TFCP2    | NM_033476_15_-1 |
| D17H6S53E   | 1.329  | 1.491  | 1.155  | 1.044  | 0.513  | 0.449  | 0.695  | 0.754  | 1.033  | 0.958  | 114585 | C6orf47  | NM_033477_17_+1 |
| Vangl2      | 3.373  | 2.892  | 1.295  | 0.494  | 2.245  | 1.326  | 1.660  | 1.800  | 1.767  | 2.458  | 93840  | VANGL2   | NM_033509_1_-1  |
| Laptm4b     | 5.219  | 5.768  | 7.335  | 7.088  | 1.010  | 2.851  | 2.070  | 4.101  | 2.000  | 4.519  | 114128 | LAPTM4B  | NM_033521_15_+1 |
| Spred2      | -0.585 | -1.128 | 0.579  | 0.337  | 1.209  | 0.426  | 1.212  | 0.232  | 0.121  | -0.246 | 114716 | SPRED2   | NM_033523_11_+1 |
| Spred1      | 1.250  | 0.892  | 3.752  | 4.142  | 4.667  | 4.071  | 5.070  | 4.774  | 5.345  | 5.649  | 114715 | SPRED1   | NM_033524_2_+1  |
| Npnt        | -4.981 | -4.981 | -4.906 | -4.952 | -4.974 | -4.974 | -4.976 | -4.972 | -4.981 | -4.981 | 114249 | NPNT     | NM_033525_3_-1  |
| Ubqln4      | 3.219  | 3.415  | 3.796  | 3.867  | 3.816  | 3.895  | 4.058  | 4.172  | 4.284  | 4.383  | 94232  | UBQLN4   | NM_033526_3_+1  |
| Oas1c       | -1.549 | 0.339  | -0.627 | -2.608 | 3.044  | 2.874  | 3.049  | 1.803  | 2.843  | 1.174  | 114643 | NA       | NM_033541_5_-1  |
| Slc4a10     | -3.170 | -3.473 | -3.191 | -4.018 | -3.760 | -4.648 | -3.597 | -4.676 | -4.494 | -4.267 | 94229  | SLC4A10  | NM_033552_2_+1  |
| Vps37a      | 6.992  | 7.648  | 5.796  | 6.152  | 5.297  | 5.716  | 5.126  | 5.459  | 4.935  | 5.604  | 52348  | VPS37A   | NM_033560_8_+1  |
| Eif4h       | 7.243  | 7.071  | 8.108  | 8.117  | 8.027  | 7.892  | 7.952  | 7.999  | 8.530  | 8.272  | 22384  | EIF4H    | NM_033561_5_-1  |
| Derl2       | 6.775  | 6.879  | 6.658  | 6.675  | 6.056  | 6.014  | 6.028  | 6.180  | 5.645  | 6.087  | 116891 | DERL2    | NM_033562_11_-1 |
| Klf7        | 3.790  | 4.510  | 3.101  | 2.654  | 3.235  | 3.289  | 3.021  | 2.796  | 2.534  | 2.068  | 93691  | KLF7     | NM_033563_1_-1  |
| Mpv17l      | -1.266 | -0.056 | -4.613 | -4.835 | -4.847 | -4.947 | -4.670 | -4.915 | -4.640 | -4.881 | 93734  | MPV17L   | NM_033564_16_+1 |
| Aff4        | 5.408  | 5.401  | 5.825  | 5.579  | 6.105  | 6.167  | 5.393  | 5.519  | 5.158  | 5.439  | 93736  | AFF4     | NM_033565_11_+1 |
| Cecr6       | -4.981 | -4.981 | -4.963 | -4.665 | -4.979 | -4.737 | 0.978  | 1.027  | 1.731  | 0.908  | 94047  | CECR6    | NM_033567_6_-1  |
| Snf8        | 6.177  | 6.064  | 5.950  | 5.963  | 5.676  | 5.665  | 5.669  | 5.696  | 5.728  | 5.490  | 27681  | SNF8     | NM_033568_11_+1 |
| Cnnm2       | -0.674 | -3.477 | -0.722 | -0.738 | -4.532 | -3.238 | -3.959 | -2.022 | -0.376 | -0.478 | 94219  | CNNM2    | NM_033569_19_+1 |
| Cnnm4       | 2.861  | 3.454  | 2.630  | 2.394  | 3.557  | 3.527  | 3.139  | 3.097  | 3.412  | 3.698  | 94220  | CNNM4    | NM_033570_1_+1  |
| Wbscr16     | 2.916  | 2.623  | 3.281  | 3.126  | 2.877  | 3.038  | 3.149  | 3.233  | 2.885  | 2.906  | 94254  | RCC1L    | NM_033572_5_-1  |
| Prcc        | 2.519  | 1.302  | 2.400  | 1.681  | 2.819  | 1.683  | 2.841  | 1.419  | 3.379  | 2.301  | 94315  | PRCC     | NM_033573_3_-1  |
| Pcdhgb1     | -4.981 | -2.760 | -4.410 | -3.964 | -4.307 | -4.958 | -4.956 | -4.296 | -4.981 | -4.981 | 93699  | PCDHGB1  | NM_033574_18_+1 |
| Pcdhgb2     | -3.349 | -4.165 | -3.318 | -4.511 | -4.530 | -4.405 | -3.593 | -4.849 | -4.981 | -4.981 | 93700  | PCDHGB2  | NM_033575_18_+1 |
| Pcdhgb4     | -1.987 | -1.701 | -2.675 | -3.070 | -1.381 | -2.787 | -1.970 | -2.296 | -4.981 | -1.871 | 93701  | PCDHGB4  | NM_033576_18_+1 |
| Pcdhgb5     | -1.272 | -3.437 | -3.370 | -3.678 | -3.177 | -4.669 | -3.711 | -3.880 | -4.981 | -3.926 | 93702  | PCDHGB5  | NM_033577_18_+1 |
| Pcdhgb6     | -1.603 | -4.362 | -2.221 | -3.446 | -2.391 | -3.786 | -2.308 | -1.796 | -3.109 | -3.070 | 93703  | PCDHGB6  | NM_033578_18_+1 |
| Pcdhgb7     | -1.396 | -3.518 | -2.494 | -2.709 | -3.052 | -4.727 | -2.896 | -3.212 | -4.981 | -4.981 | 93704  | PCDHGB7  | NM_033579_18_+1 |
| Pcdhgb8     | -4.981 | -4.122 | -4.915 | -4.714 | -3.548 | -4.905 | -4.981 | -4.575 | -4.981 | -4.981 | 93705  | PCDHGB8  | NM_033580_18_+1 |
| Pcdhgc3     | -3.191 | -4.378 | -3.913 | -2.610 | -3.500 | -3.441 | -2.563 | -3.494 | -4.981 | -2.846 | 93706  | PCDHGC3  | NM_033581_18_+1 |
| Pcdhgc4     | -3.639 | -4.777 | -3.985 | -2.299 | -3.299 | -4.323 | -4.834 | -4.501 | -4.981 | -1.742 | 93707  | PCDHGC4  | NM_033582_18_+1 |
| Pcdhgc5     | -4.981 | -4.428 | -4.977 | -4.917 | -4.865 | -4.587 | -4.928 | -4.800 | -2.351 | -4.981 | 93708  | PCDHGC5  | NM_033583_18_+1 |
| Pcdhga1     | -1.670 | -3.556 | -4.965 | -4.731 | -2.128 | -3.233 | -3.482 | -4.535 | -4.981 | -4.981 | 93709  | PCDHGA1  | NM_033584_18_+1 |
| Pcdhga2     | -4.981 | -3.556 | -2.846 | -4.650 | -4.645 | -4.965 | -4.972 | -4.791 | -4.981 | -4.981 | 93710  | PCDHGA2  | NM_033585_18_+1 |
| Pcdhga3     | -4.981 | -4.393 | -3.313 | -4.884 | -4.867 | -4.800 | -4.964 | -3.914 | -4.981 | -4.981 | 93711  | PCDHGA3  | NM_033586_18_+1 |
| Pcdhga4     | -1.275 | -3.538 | -3.620 | -4.496 | -4.056 | -3.874 | -4.893 | -3.436 | -4.981 | -4.981 | 93712  | PCDHGA4  | NM_033587_18_+1 |
| Pcdhga5     | -3.635 | -0.662 | -2.632 | -4.640 | -4.884 | -4.450 | -4.227 | -2.562 | -4.981 | -2.532 | 93713  | PCDHGA5  | NM_033588_18_+1 |
| Pcdhga6     | -4.981 | -3.582 | -4.936 | -4.546 | -4.924 | -4.924 | -4.944 | -4.655 | -4.981 | -4.981 | 93714  | PCDHGA6  | NM_033589_18_+1 |
| Pcdhga7     | -4.981 | -4.277 | -2.750 | -4.318 | -2.313 | -2.723 | -4.390 | -4.439 | -3.796 | -4.981 | 93715  | PCDHGA7  | NM_033590_18_+1 |

|          |        |        |        |        |        |        |        |        |        |        |        |          |                 |
|----------|--------|--------|--------|--------|--------|--------|--------|--------|--------|--------|--------|----------|-----------------|
| Pcdhga8  | -3.638 | -4.473 | -4.204 | -4.756 | -3.031 | -2.289 | -3.842 | -4.685 | -4.981 | -4.080 | 93716  | PCDHGA8  | NM_033591_18_+1 |
| Pcdhga9  | -4.981 | -4.451 | -4.946 | -4.856 | -4.867 | -4.691 | -4.547 | -4.932 | -4.981 | -4.981 | 93717  | PCDHGA9  | NM_033592_18_+1 |
| Pcdhga10 | -4.981 | -2.070 | -4.967 | -4.730 | -4.959 | -4.597 | -4.973 | -4.772 | -4.981 | -4.981 | 93722  | PCDHGA10 | NM_033593_18_+1 |
| Pcdhga11 | -4.981 | -1.024 | -4.505 | -4.849 | -4.632 | -2.338 | -3.605 | -3.156 | -4.981 | -3.931 | 93723  | PCDHGA11 | NM_033594_18_+1 |
| Pcdhga12 | -1.685 | -4.798 | -2.439 | -2.587 | -2.926 | -3.001 | -2.838 | -2.749 | -1.497 | -1.151 | 93724  | PCDHGA12 | NM_033595_18_+1 |
| Hist2h4  | -0.059 | 0.426  | -0.919 | -1.361 | -0.048 | -0.111 | 0.467  | -0.661 | 0.229  | -0.083 | 97122  | HIST1H4C | NM_033596_3_-1  |
| Bcl3     | 5.585  | 5.372  | 5.134  | 5.060  | 6.641  | 6.434  | 6.485  | 6.087  | 6.560  | 6.319  | 12051  | BCL3     | NM_033601_7_-1  |
| Peli2    | 5.003  | 4.652  | -2.729 | -1.557 | -0.184 | -0.491 | 0.904  | 1.484  | 3.248  | 3.878  | 93834  | PELI2    | NM_033602_14_+1 |
| Amn      | -4.981 | -4.981 | -3.628 | -4.398 | -3.311 | -3.944 | -3.156 | -3.985 | -2.953 | -2.946 | 93835  | AMN      | NM_033603_12_+1 |
| Rnf111   | 4.974  | 5.050  | 5.561  | 5.385  | 6.217  | 6.191  | 5.837  | 5.703  | 6.091  | 6.124  | 93836  | RNF111   | NM_033604_9_-1  |
| Dach2    | -4.981 | -1.137 | -4.980 | -4.974 | -3.564 | -4.989 | -4.883 | -4.978 | -4.981 | -4.874 | 93837  | DACH2    | NM_033605_X_+1  |
| Dqx1     | 0.466  | 2.258  | 0.862  | 1.213  | 0.616  | 2.241  | 0.659  | 1.090  | -0.037 | 1.516  | 93838  | DQX1     | NM_033606_6_+1  |
| Uchl4    | -0.416 | 0.470  | 0.706  | 0.288  | 1.297  | 1.515  | 1.350  | -0.125 | 0.881  | 0.944  | 93841  | NA       | NM_033607_9_+1  |
| Igsf9    | -1.424 | -2.063 | -2.595 | -2.740 | -4.229 | -4.784 | -3.346 | -4.028 | -4.209 | -4.191 | 93842  | IGSF9    | NM_033608_1_+1  |
| Med15    | 4.538  | 4.297  | 4.478  | 4.852  | 4.570  | 4.345  | 4.799  | 4.950  | 6.485  | 5.939  | 94112  | NA       | NM_033609_16_-1 |
| Cela1    | 3.166  | 0.989  | 1.208  | 2.023  | 2.608  | 1.934  | 2.230  | 2.511  | 0.798  | 0.058  | 109901 | CELA1    | NM_033612_15_-1 |
| Dxo      | 3.249  | 3.703  | 2.794  | 2.771  | 2.464  | 3.047  | 2.253  | 2.442  | 2.643  | 2.627  | 112403 | DXO      | NM_033613_17_+1 |
| Adam33   | -4.052 | -4.981 | -4.984 | -4.648 | -4.699 | -2.192 | -4.138 | -0.959 | -1.812 | -4.260 | 110751 | ADAM33   | NM_033615_2_-1  |
| Atp6vob  | 8.744  | 8.678  | 7.982  | 8.026  | 8.081  | 8.241  | 8.150  | 8.352  | 8.490  | 8.519  | 114143 | ATP6VOB  | NM_033617_4_-1  |
| Supt16   | 6.061  | 6.194  | 5.837  | 6.432  | 5.922  | 6.818  | 5.697  | 6.670  | 4.540  | 6.656  | 114741 | SUPT16H  | NM_033618_14_-1 |
| Pard3    | -0.092 | 0.249  | -3.904 | -4.422 | -4.822 | -4.706 | -4.977 | -4.750 | -4.981 | -4.981 | 93742  | PARD3    | NM_033620_8_+1  |
| Tnfsf13b | -0.779 | 0.814  | 1.787  | 2.606  | -0.393 | -0.418 | 2.568  | 2.977  | 4.041  | 3.463  | 24099  | TNFSF13B | NM_033622_8_+1  |
| Dcun1d1  | 2.687  | 2.319  | 2.132  | 2.219  | 1.134  | 0.006  | 0.314  | 1.164  | 1.132  | 2.446  | 114893 | DCUN1D1  | NM_033623_3_-1  |
| Fxyd4    | -4.981 | -3.650 | -3.085 | -3.667 | -0.881 | -2.098 | -4.611 | -4.718 | -4.625 | -4.981 | 108017 | FXDY4    | NM_033648_6_-1  |
| Fxyd2    | -4.922 | -4.815 | -3.453 | 0.868  | -0.590 | -2.212 | 3.124  | 0.727  | -4.955 | -4.981 | 11936  | NA       | NM_052823_9_+1  |
| Rpl10    | 10.607 | 10.566 | 10.701 | 10.557 | 9.777  | 9.644  | 10.160 | 10.202 | 9.677  | 9.736  | 110954 | RPL10    | NM_052835_X_+1  |
| Strn3    | 2.547  | 2.411  | 1.885  | 2.514  | 2.208  | 2.260  | 2.174  | 1.588  | 2.236  | 3.162  | 94186  | STRN3    | NM_052973_12_-1 |
| Ophn1    | 2.510  | 2.662  | -1.229 | -1.808 | -4.111 | -3.341 | -1.804 | 0.607  | 3.088  | 3.814  | 94190  | OPHN1    | NM_052976_X_-1  |
| Fxyd1    | -4.981 | -4.981 | -4.891 | -4.962 | -4.979 | -4.981 | -4.977 | -4.974 | -4.981 | -4.981 | 56188  | FXDY1    | NM_052992_7_-1  |
| C1gal1   | 4.408  | 4.561  | 2.846  | 3.325  | 3.198  | 3.319  | 3.204  | 3.807  | 4.059  | 4.829  | 94192  | C1GALT1  | NM_052993_6_+1  |
| Spock2   | -4.981 | -4.981 | -4.959 | -4.688 | -4.221 | -4.434 | -4.510 | -4.135 | -4.981 | -2.609 | 94214  | SPOCK2   | NM_052994_10_+1 |
| Zfp91    | 5.540  | 5.322  | 5.274  | 5.407  | 5.519  | 5.518  | 5.496  | 5.268  | 5.257  | 5.402  | 109910 | ZFP91    | NM_053009_19_-1 |
| Agpat3   | 5.185  | 5.100  | 6.965  | 6.904  | 5.198  | 5.476  | 4.793  | 5.317  | 4.067  | 4.473  | 28169  | AGPAT3   | NM_053014_10_-1 |
| Chrac1   | 7.572  | 7.663  | 6.737  | 6.768  | 6.722  | 6.951  | 6.995  | 6.966  | 6.199  | 6.124  | 93696  | CHRA1    | NM_053068_15_+1 |
| Atg5     | 6.939  | 6.802  | 5.863  | 6.026  | 5.608  | 5.836  | 6.050  | 6.062  | 5.879  | 6.233  | 11793  | ATG5     | NM_053069_10_+1 |
| Car7     | -4.434 | -4.981 | -4.705 | -4.977 | -4.562 | -4.602 | -4.892 | -4.889 | -3.952 | -4.981 | 12354  | CA7      | NM_053070_8_+1  |
| Cox6c    | 8.732  | 8.359  | 8.612  | 8.346  | 8.541  | 8.368  | 8.614  | 8.134  | 7.679  | 7.132  | 12864  | NA       | NM_053071_15_-1 |
| Fgd6     | 1.043  | -0.058 | 4.838  | 4.489  | -2.288 | -1.762 | -0.519 | 2.081  | 1.909  | 2.938  | 13998  | FGD6     | NM_053072_10_+1 |
| Nup62    | 4.427  | 4.539  | 5.096  | 5.250  | 5.502  | 5.255  | 5.519  | 5.347  | 4.561  | 4.452  | 18226  | NUP62    | NM_053074_7_+1  |
| Rheb     | 7.276  | 7.145  | 7.383  | 7.033  | 6.818  | 6.729  | 6.905  | 6.657  | 6.283  | 6.316  | 19744  | RHEB     | NM_053075_5_-1  |
| Rtn3     | 5.222  | 5.530  | 5.905  | 6.059  | 6.410  | 6.518  | 6.498  | 6.507  | 6.973  | 7.066  | 20168  | RTN3     | NM_053076_19_-1 |
| Nrep     | -4.981 | -4.981 | -4.496 | -4.769 | -4.814 | -4.952 | -4.862 | -4.957 | -4.584 | -4.854 | 27528  | NREP     | NM_053078_18_-1 |
| Slc15a1  | -4.981 | -4.981 | -3.109 | -5.015 | -3.225 | -4.880 | -4.261 | -4.951 | -4.981 | -4.342 | 56643  | SLC15A1  | NM_053079_14_-1 |
| Aldh1a3  | -2.075 | -4.981 | -3.441 | -2.422 | -0.852 | -3.349 | -1.759 | -2.968 | -2.847 | -1.883 | 56847  | ALDH1A3  | NM_053080_7_-1  |
| Fancg    | 3.351  | 5.608  | 2.735  | 4.048  | 3.878  | 5.286  | 3.311  | 4.377  | 3.583  | 3.867  | 60534  | FANCG    | NM_053081_4_-1  |
| Tspan4   | -0.490 | -1.523 | -0.613 | -0.801 | -0.901 | -1.399 | -0.392 | -0.857 | -2.510 | -2.180 | 64540  | TSPAN4   | NM_053082_7_+1  |
| Loxl4    | -2.250 | -1.786 | -3.372 | -3.395 | -0.919 | -3.168 | -3.566 | -3.343 | -1.861 | -0.665 | 67573  | LOXL4    | NM_053083_19_-1 |
| Trim32   | -0.349 | 0.518  | 0.961  | 0.425  | 0.758  | 0.934  | 0.369  | 0.766  | 1.790  | 2.458  | 69807  | TRIM32   | NM_053084_4_+1  |
| Nolc1    | 1.605  | 2.300  | 0.820  | 1.582  | 1.420  | 1.058  | -0.019 | 1.322  | 1.085  | 1.431  | 70769  | NA       | NM_053086_19_+1 |
| Ifitm5   | -4.981 | -4.981 | -0.448 | -2.201 | 0.297  | -0.756 | 0.320  | -0.827 | 0.742  | 0.549  | 73835  | IFITM5   | NM_053088_7_-1  |
| Naa15    | 5.789  | 5.688  | 5.885  | 5.899  | 5.562  | 5.572  | 5.548  | 5.379  | 5.247  | 5.611  | 74838  | NAA15    | NM_053089_3_+1  |
| Fam126a  | 3.435  | 3.471  | 3.938  | 3.987  | 5.085  | 4.686  | 5.279  | 4.506  | 6.095  | 5.367  | 84652  | FAM126A  | NM_053090_5_-1  |
| Kars     | 5.649  | 5.798  | 5.617  | 5.845  | 5.707  | 5.608  | 5.571  | 5.624  | 5.205  | 4.923  | 85305  | KARS     | NM_053092_8_-1  |
| Tac4     | 0.400  | 0.555  | -4.705 | -3.991 | -4.343 | -4.575 | -3.449 | -4.262 | -1.742 | -3.386 | 93670  | NA       | NM_053093_11_+1 |
| Cd163    | 2.674  | 2.102  | 0.958  | 0.996  | 1.559  | 0.573  | 2.344  | 3.962  | 2.182  | 2.504  | 93671  | CD163    | NM_053094_6_+1  |
| Nat8f2   | -4.981 | -4.981 | -4.935 | -4.593 | -4.949 | -4.565 | -4.940 | -4.655 | -4.981 | -4.981 | 93673  | NA       | NM_053096_6_-1  |
| Setbp1   | 4.240  | 4.419  | 0.793  | 0.510  | 3.358  | 3.936  | 1.463  | 1.906  | -0.423 | 0.047  | 240427 | SETBP1   | NM_053099_18_-1 |
| Trim8    | 5.814  | 5.526  | 5.514  | 5.573  | 5.741  | 5.829  | 5.988  | 6.186  | 7.111  | 7.091  | 93679  | TRIM8    | NM_053100_19_+1 |
| Sep15    | 9.609  | 9.665  | 8.382  | 8.423  | 8.601  | 8.629  | 8.489  | 8.562  | 8.409  | 8.521  | 93684  | SELENOF  | NM_053102_3_+1  |
| Entpd7   | 3.086  | 3.673  | 3.176  | 3.817  | 3.343  | 3.850  | 3.015  | 3.596  | 3.636  | 4.274  | 93685  | ENTPD7   | NM_053103_19_+1 |
| Rbfox2   | -4.981 | -4.981 | -4.965 | -4.831 | -4.977 | -4.968 | -4.086 | -4.804 | -4.981 | -4.910 | 93686  | RBFOX2   | NM_053104_15_-1 |
| Gpr45    | -4.981 | -4.981 | -4.972 | -4.972 | -4.961 | -4.865 | -4.981 | -4.981 | -4.981 | -4.981 | 93690  | GPR45    | NM_053107_1_+1  |
| Glrx     | 5.943  | 4.196  | 8.497  | 8.896  | 7.438  | 7.014  | 7.365  | 7.340  | 6.880  | 7.520  | 93692  | GLRX     | NM_053108_13_+1 |
| Clec2d   | 3.831  | 4.635  | 2.926  | 2.946  | 2.299  | 3.283  | 3.192  | 3.599  | 1.105  | 2.011  | 93694  | NA       | NM_053109_6_+1  |
| Gpnmb    | -0.371 | -0.676 | -2.550 | -4.256 | -4.787 | -4.303 | -1.099 | -2.857 | 1.707  | 0.072  | 93695  | GPNUMB   | NM_053110_6_+1  |
| Ear6     | -4.981 | -4.981 | -4.976 | -4.769 | -4.952 | -4.754 | -3.757 | -3.381 | -4.981 | -1.006 | 93719  | NA       | NM_053111_14_+1 |
| Ear10    | -4.981 | -4.981 | -4.305 | -2.994 | -3.961 | -2.040 | -2.070 | 2.527  | -1.295 | 4.872  | 93725  | NA       | NM_053112_14_-1 |
| Rnase2a  | -4.981 | -1.910 | -4.940 | -3.886 | -4.824 | -3.380 | -4.955 | -2.415 | -2.234 | 2.717  | 93726  | RNASE2   | NM_053113_14_-1 |
| Pard6g   | -3.843 | 0.304  | 0.568  | 1.837  | -0.887 | 1.067  | -0.231 | 1.304  | -4.981 | -0.746 | 93737  | PARD6G   | NM_053117_18_+1 |
| Echs1    | 6.076  | 5.950  | 5.752  | 5.832  | 5.619  | 5.814  | 6.019  | 5.963  | 6.932  | 5.817  | 93747  | ECHS1    | NM_053119_7_-1  |
| Immp2l   | 4.240  | 4.823  | 4.029  | 4.234  | 4.806  | 5.017  | 3.593  | 3.653  | -0.199 | -0.156 | 93757  | IMMP2L   | NM_053122_12_+1 |
| Smarca5  | 6.359  | 6.377  | 6.758  | 6.681  | 6.971  | 6.830  | 6.816  | 6.824  | 6.710  | 6.924  | 93762  | SMARCA5  | NM_053124_8_-1  |
| Pcdhb14  | -4.981 | -0.808 | -4.977 | -4.977 | -4.083 | -4.818 | -4.840 | -3.636 | -4.981 | -4.981 | 93885  | NA       | NM_053139_18_+1 |
| Pcdhb22  | -3.189 | -1.318 | -4.274 | -3.106 | -4.941 | -4.941 | -2.355 | -3.792 | -4.981 | -4.981 | 93893  | PCDHB15  | NM_053147_18_+1 |

|               |        |        |        |        |        |        |        |        |        |        |        |          |                     |
|---------------|--------|--------|--------|--------|--------|--------|--------|--------|--------|--------|--------|----------|---------------------|
| Hemgn         | -1.987 | 1.165  | -1.048 | 2.908  | 0.089  | 3.224  | 0.490  | 3.546  | -1.455 | 1.418  | 93966  | HEMGN    | NM_053149_4_-1      |
| Klra21        | -4.981 | 2.726  | -4.879 | -1.777 | -4.816 | -1.717 | -4.753 | -0.910 | -4.832 | -4.426 | 93968  | NA       | NM_053151_6_-1      |
| Klra18        | -2.704 | 0.019  | -1.310 | -4.409 | -3.579 | -3.038 | -3.093 | -3.706 | -4.981 | -4.981 | 93970  | NA       | NM_053153_6_-1      |
| Klra19        | -4.981 | -1.859 | -4.140 | -4.967 | -4.837 | -3.881 | -4.973 | -3.436 | -4.981 | -4.981 | 93971  | NA       | NM_053154_6_-1      |
| Clmn          | -4.981 | -3.482 | -4.709 | -4.293 | -3.829 | -2.601 | -3.723 | -2.229 | -3.423 | 1.518  | 94040  | CLMN     | NM_053155_12_-1     |
| Tm2d1         | 7.021  | 7.023  | 6.234  | 6.073  | 6.068  | 6.075  | 6.045  | 5.684  | 5.259  | 5.445  | 94043  | TM2D1    | NM_053157_4_-1      |
| Mrpl1         | 4.843  | 4.735  | 3.967  | 4.105  | 4.099  | 3.929  | 4.466  | 4.297  | 4.265  | 4.319  | 94061  | MRPL1    | NM_053158_5_+1      |
| Mrpl3         | 5.978  | 6.075  | 5.717  | 5.776  | 5.560  | 5.527  | 5.233  | 5.421  | 4.959  | 4.717  | 94062  | MRPL3    | NM_053159_9_+1      |
| Mrpl27        | 6.538  | 6.285  | 5.660  | 5.646  | 5.133  | 5.228  | 5.563  | 5.570  | 4.852  | 4.814  | 94064  | MRPL27   | NM_053161_11_+1     |
| Mrpl34        | 5.937  | 5.734  | 5.359  | 5.309  | 4.830  | 5.020  | 5.486  | 5.439  | 4.590  | 4.658  | 94065  | MRPL34   | NM_053162_8_+1      |
| Mrpl36        | 7.104  | 6.755  | 6.403  | 6.240  | 6.027  | 6.014  | 6.218  | 6.302  | 5.859  | 5.631  | 94066  | MRPL36   | NM_053163_13_+1     |
| Mrpl43        | 6.595  | 6.587  | 6.404  | 6.281  | 6.049  | 6.099  | 6.211  | 6.096  | 5.914  | 5.682  | 94067  | MRPL43   | NM_053164_19_-1     |
| Trim7         | 0.946  | 0.105  | 2.929  | 2.831  | 2.837  | 2.877  | 2.089  | 1.831  | -1.629 | -0.597 | 94089  | TRIM7    | NM_053166_11_+1     |
| Trim11        | 5.959  | 5.334  | 5.157  | 4.430  | 5.483  | 4.827  | 5.422  | 4.403  | 5.488  | 4.483  | 94091  | TRIM11   | NM_053168_11_+1     |
| Trim16        | -0.993 | 0.981  | 0.200  | 0.428  | -1.455 | -1.652 | 2.235  | 2.124  | 4.911  | 4.687  | 94092  | TRIM16   | NM_053169_11_+1     |
| Trim33        | 2.653  | 4.065  | 3.507  | 2.884  | 3.079  | 3.432  | 3.541  | 3.385  | 2.747  | 3.812  | 94093  | TRIM33   | NM_053170_3_+1      |
| Kifc5b        | -1.799 | -1.952 | -1.087 | -2.210 | -0.183 | -1.570 | -1.386 | -3.640 | -4.165 | -3.981 | 16580  | KIFC1    | NM_053173_17_+1     |
| Mcoln1        | 5.742  | 5.639  | 4.702  | 4.718  | 5.103  | 5.232  | 5.103  | 5.214  | 5.306  | 5.228  | 94178  | MCOLN1   | NM_053177_8_+1      |
| Acsbg1        | -4.981 | -4.981 | -2.918 | -4.830 | -0.439 | 1.318  | -0.953 | -1.080 | -3.531 | -4.981 | 94180  | ACSBG1   | NM_053178_9_-1      |
| Nans          | 6.272  | 6.058  | 5.524  | 5.847  | 5.387  | 5.444  | 5.171  | 5.501  | 4.914  | 5.097  | 94181  | NANS     | NM_053179_4_+1      |
| Cdk20         | 4.566  | 3.414  | 0.309  | -0.079 | 0.458  | 0.427  | 0.799  | 0.425  | 2.178  | 2.612  | 105278 | CDK20    | NM_053180_13_+1     |
| Pdxdc1        | -0.863 | 0.421  | 2.388  | 2.046  | 1.447  | 1.312  | 1.854  | 1.855  | 3.560  | 3.132  | 94184  | PDXDC1   | NM_053181_16_-1     |
| Pag1          | 1.767  | 1.288  | 0.261  | -0.387 | 0.961  | 1.406  | 1.290  | 1.396  | 2.785  | 2.978  | 94212  | PAG1     | NM_053182_3_-1      |
| Ddx50         | 5.662  | 5.710  | 5.945  | 6.017  | 5.597  | 5.660  | 5.493  | 5.550  | 5.449  | 5.541  | 94213  | DDX50    | NM_053183_10_-1     |
| Cnnm3         | 3.277  | 3.696  | 3.835  | 3.646  | 3.312  | 3.192  | 3.582  | 3.840  | 5.015  | 4.853  | 94218  | CNNM3    | NM_053186_1_+1      |
| Gopc          | 4.002  | 4.201  | 4.645  | 4.667  | 4.616  | 4.486  | 4.674  | 4.359  | 4.783  | 5.293  | 94221  | GOPC     | NM_053187_10_-1     |
| S1pr5         | -3.189 | -4.981 | -1.105 | -2.135 | -4.872 | -1.388 | 5.615  | 4.748  | 6.640  | 5.716  | 94226  | S1PR5    | NM_053190_9_-1      |
| Pi15          | -4.981 | -3.267 | -3.632 | -4.367 | -4.249 | -4.970 | -4.518 | -4.792 | -4.190 | -4.227 | 94227  | PI15     | NM_053191_1_+1      |
| Cpsf1         | 4.241  | 4.513  | 5.381  | 5.737  | 5.578  | 5.587  | 5.510  | 5.740  | 6.261  | 6.192  | 94230  | CPSF1    | NM_053193_15_-1     |
| Ric8a         | 6.253  | 6.204  | 6.362  | 6.206  | 6.373  | 6.507  | 6.292  | 6.539  | 7.066  | 6.950  | 101489 | RIC8A    | NM_053194_7_+1      |
| Slc24a3       | -4.981 | -4.981 | -4.960 | -4.960 | -4.364 | -4.573 | -2.016 | -3.340 | -1.008 | -3.209 | 94249  | SLC24A3  | NM_053195_2_+1      |
| Sfxn2         | 4.599  | 4.649  | 4.990  | 4.449  | 5.089  | 4.614  | 4.680  | 3.986  | 4.239  | 2.626  | 94279  | SFXN2    | NM_053196_19_+1     |
| Sfxn3         | 5.439  | 5.666  | 5.407  | 5.718  | 4.500  | 4.780  | 5.502  | 6.282  | 6.703  | 6.740  | 94280  | SFXN3    | NM_053197_19_+1     |
| Sfxn4         | 3.460  | 3.538  | 0.711  | -0.039 | 1.470  | 1.582  | 1.047  | 0.140  | -0.765 | -0.913 | 94281  | SFXN4    | NM_053198_19_-1     |
| Cadm3         | -4.981 | -2.681 | 0.900  | -1.175 | 4.125  | 2.459  | 3.461  | 1.994  | -2.194 | -2.982 | 94332  | CADM3    | NM_053199_1_-1      |
| Magee1        | 2.534  | 2.403  | 1.244  | 1.275  | 2.979  | 2.785  | 2.441  | 2.065  | 2.629  | 2.908  | 107528 | MAGEE1   | NM_053201_X_+1      |
| Foxp1         | 5.579  | 5.314  | 4.579  | 4.389  | 5.532  | 5.352  | 5.805  | 5.583  | 6.191  | 6.051  | 108655 | NA       | NM_053202_6_-1      |
| Erc1          | 3.012  | 1.464  | 2.141  | 3.353  | -1.913 | 0.852  | -2.218 | 1.818  | -1.312 | 2.401  | 111173 | ERC1     | NM_053204_6_-1      |
| Magee2        | 2.524  | 2.728  | -1.214 | -1.460 | -1.707 | -3.612 | -3.011 | -3.074 | -4.190 | -3.210 | 272790 | MAGEE2   | NM_053206_X_-1      |
| Egln1         | 4.829  | 4.760  | 4.689  | 4.450  | 4.566  | 4.339  | 4.731  | 4.389  | 5.522  | 5.371  | 112405 | EGLN1    | NM_053207_8_-1      |
| Egln2         | 4.442  | 4.370  | 4.165  | 4.229  | 4.003  | 4.175  | 4.612  | 4.655  | 5.086  | 5.014  | 112406 | EGLN2    | NM_053208_7_-1      |
| Myo1f         | 4.916  | 5.448  | 7.801  | 7.878  | 8.583  | 8.643  | 8.653  | 8.770  | 10.109 | 10.358 | 17916  | MYO1F    | NM_053214_17_+1     |
| 1700102P08Rik | -2.505 | -1.306 | -1.949 | -1.864 | -3.133 | -2.554 | -1.795 | -1.600 | -2.095 | -1.382 | 112418 | C3orf62  | NM_053216_9_+1      |
| Ifit1b12      | -4.981 | -4.981 | -4.151 | -4.596 | -0.575 | -2.208 | -1.313 | -2.526 | -1.111 | -3.614 | 112419 | IFIT1    | NM_053217_19_-1     |
| Kiss1r        | 0.763  | 0.833  | -1.385 | -3.203 | -2.034 | -2.127 | -0.842 | -2.198 | -1.577 | -2.797 | 114229 | KISS1R   | NM_053244_10_+1     |
| Aipl1         | -0.260 | -2.137 | -2.180 | -1.722 | -1.514 | -2.150 | -2.923 | -3.842 | -1.670 | -2.140 | 114230 | AIPL1    | NM_053245_11_-1     |
| Dok4          | 1.551  | 1.650  | -0.073 | -0.400 | 0.640  | -0.607 | -0.049 | -0.035 | 0.024  | 1.073  | 114255 | DOK4     | NM_053246_8_-1      |
| Lyve1         | 0.752  | -3.315 | -2.746 | -2.914 | -4.939 | -4.235 | -4.957 | -3.880 | -3.750 | -4.981 | 114332 | LYVE1    | NM_053247_7_-1      |
| Slc5a5        | -4.981 | -4.981 | -3.289 | -4.958 | -1.233 | -0.140 | -0.408 | -0.493 | -0.125 | -0.217 | 114479 | SLC5A5   | NM_053248_8_-1      |
| Ehbp111       | 1.468  | 2.291  | 4.187  | 4.168  | 3.286  | 3.111  | 4.070  | 3.717  | 5.588  | 4.942  | 114601 | NA       | NM_053252_19_-1     |
| Zmynd10       | -0.267 | -1.618 | -3.068 | -0.679 | -3.989 | -4.682 | -4.971 | -4.154 | -3.531 | -2.747 | 114602 | ZMYND10  | NM_053253_9_+1      |
| Tle6          | 0.248  | -0.922 | -3.273 | -2.338 | -1.010 | -1.003 | 0.973  | 1.082  | 0.167  | 0.379  | 114606 | TLE6     | NM_053254_10_-1     |
| Elac1         | 4.106  | 4.775  | 4.627  | 4.436  | 4.948  | 5.181  | 4.620  | 4.491  | 5.282  | 5.220  | 114615 | ELAC1    | NM_053255_18_-1     |
| Rpl31         | 9.947  | 9.904  | 8.420  | 8.374  | 8.021  | 8.029  | 8.338  | 8.278  | 7.342  | 7.196  | 114641 | RPL31    | NM_053257_1_+1      |
| Prss29        | 0.008  | 0.467  | -4.262 | -0.612 | -3.441 | -0.700 | -4.212 | 0.871  | -4.981 | -2.309 | 114662 | NA       | NM_053260_17_+1     |
| Impa2         | 3.863  | 2.816  | 4.330  | 4.332  | 3.680  | 3.418  | 3.930  | 3.867  | 4.087  | 3.805  | 114663 | IMPA2    | NM_053261_18_+1     |
| Hsd17b11      | 5.472  | 5.505  | 5.500  | 5.550  | 4.431  | 4.707  | 5.490  | 5.138  | 4.678  | 4.891  | 114664 | HSD17B11 | NM_053262_5_-1      |
| Hnnpa3        | 6.482  | 6.631  | 6.100  | 6.017  | 6.419  | 5.849  | 6.456  | 5.744  | 5.436  | 5.204  | 229279 | NA       | NM_053263_2_+1      |
| 4930444G20Rik | -4.981 | -4.981 | -4.804 | -4.948 | -4.972 | -4.835 | -4.830 | -4.970 | -4.981 | -4.342 | 114671 | NA       | NM_053264_10_-1     |
| Gtf2ird2      | 4.102  | 4.491  | 2.470  | 2.176  | 2.699  | 2.609  | 2.699  | 2.407  | 2.434  | 2.217  | 114674 | NA       | NM_053266_5_+1      |
| Selm          | 2.606  | 2.587  | 1.457  | 1.544  | 1.644  | 2.592  | 3.321  | 3.177  | 2.510  | 2.345  | 114679 | SELENOM  | NM_053267_11_+1     |
| Rasa2         | 3.735  | 3.897  | 4.753  | 4.855  | 4.561  | 4.695  | 4.228  | 4.008  | 3.410  | 3.612  | 114713 | RASA2    | NM_053268_9_-1      |
| Rad51c        | 0.122  | 1.692  | -0.349 | 0.872  | 1.493  | 0.924  | 0.734  | 0.758  | -0.753 | 0.011  | 114714 | RAD51C   | NM_053269_11_-1     |
| Dhcr24        | 4.634  | 4.219  | 1.935  | 1.573  | 0.991  | 1.770  | 2.199  | 2.498  | 1.034  | 2.771  | 74754  | DHCR24   | NM_053272_4_+1      |
| Ttyh2         | 0.002  | -1.029 | 2.273  | 2.460  | 2.407  | 2.892  | 1.717  | 1.535  | -0.010 | 0.388  | 117160 | TTYH2    | NM_053273_11_+1     |
| Foxp3         | -1.685 | -3.743 | -4.259 | -2.672 | -4.565 | -2.781 | -3.894 | -4.672 | -4.474 | -4.702 | 20371  | FOXP3    | NM_054039_X_+1      |
| Tulp4         | 2.706  | 2.999  | 3.303  | 3.480  | 3.616  | 3.845  | 3.139  | 2.925  | 2.608  | 3.151  | 68842  | TULP4    | NM_054040_17_+1     |
| Antxr1        | -4.981 | -4.981 | -2.349 | -4.169 | -0.870 | -1.496 | -0.532 | -1.932 | -4.981 | -4.981 | 69538  | ANTXR1   | NM_054041_6_-1      |
| Cd248         | -4.981 | -1.842 | -4.926 | -3.239 | -4.280 | -3.883 | -4.978 | -4.216 | -4.394 | -4.981 | 70445  | CD248    | NM_054042_19_+1     |
| Ms12          | 3.537  | 3.424  | 3.648  | 3.002  | 3.399  | 2.598  | 2.829  | 2.519  | 1.139  | 0.798  | 76626  | MSI2     | NM_054043_11_-1     |
| Adgra2        | -1.507 | -1.351 | 3.857  | 3.179  | 4.221  | 4.492  | 3.191  | 2.397  | 0.137  | -1.604 | 78560  | ADGRA2   | NM_054044_8_+1      |
| Hist2h3c2     | -3.353 | -1.963 | -1.456 | -2.144 | -2.524 | -2.044 | -1.504 | -2.629 | -3.453 | -2.048 | 97114  | HIST1H3G | NM_054045_3_-1      |
| Hist2h3c2     | -3.353 | -1.963 | -1.824 | -1.685 | -2.526 | -3.371 | -1.504 | -2.629 | -3.453 | -2.048 | 97114  | HIST1H3G | NM_054045_dup1_3_+1 |
| Def8          | 3.422  | 2.563  | 3.882  | 3.965  | 2.992  | 3.203  | 3.288  | 3.258  | 4.798  | 3.847  | 23854  | DEF8     | NM_054046_8_+1      |

|               |        |        |        |        |        |        |        |        |        |        |        |          |                 |
|---------------|--------|--------|--------|--------|--------|--------|--------|--------|--------|--------|--------|----------|-----------------|
| Rcor2         | -1.378 | -0.684 | -2.297 | -3.020 | -3.372 | -4.686 | -2.876 | -4.270 | -4.981 | -2.696 | 104383 | RCOR2    | NM_054048_19_+1 |
| Rapgef1       | 5.509  | 5.287  | 5.154  | 5.239  | 6.513  | 6.424  | 5.729  | 5.205  | 5.176  | 5.417  | 107746 | RAPGEF1  | NM_054050_2_+1  |
| Pip4k2b       | 2.255  | 2.029  | 2.178  | 1.845  | 2.882  | 2.647  | 2.498  | 1.576  | 1.661  | 1.631  | 108083 | PIP4K2B  | NM_054051_11_-1 |
| B3gnt5        | -0.040 | -1.027 | 2.607  | 3.138  | -1.827 | 0.000  | 0.014  | 0.871  | 0.741  | 0.583  | 108105 | B3GNT5   | NM_054052_16_+1 |
| Adgrv1        | -1.307 | -4.981 | -3.915 | -2.437 | -2.861 | -3.276 | -0.697 | -1.013 | -0.840 | -1.786 | 110789 | ADGRV1   | NM_054053_13_-1 |
| Brdt          | -0.006 | -0.125 | -1.832 | -1.744 | -4.288 | -4.151 | -2.342 | -2.723 | -1.162 | -1.934 | 114642 | BRDT     | NM_054054_5_+1  |
| Slc13a3       | -4.981 | -4.981 | -2.385 | -4.154 | -2.062 | -3.705 | 1.663  | 1.009  | 0.855  | 0.703  | 114644 | SLC13A3  | NM_054055_2_-1  |
| Pawr          | -4.981 | -4.981 | -4.982 | -1.210 | -4.096 | -0.326 | -4.289 | 0.148  | -4.394 | -1.543 | 114774 | PAWR     | NM_054056_10_+1 |
| Prosc         | 4.986  | 5.165  | 6.373  | 6.542  | 6.040  | 6.132  | 5.999  | 6.048  | 5.471  | 5.565  | 114863 | PROSC    | NM_054057_8_+1  |
| Psg28         | -4.981 | -4.981 | -4.465 | -4.781 | -4.832 | -4.953 | -4.976 | -4.872 | -4.981 | -4.981 | 114871 | NA       | NM_054063_7_-1  |
| Psg29         | -4.981 | -4.981 | -4.774 | -4.946 | -4.957 | -4.936 | -4.802 | -4.890 | -4.981 | -4.316 | 114872 | NA       | NM_054064_7_+1  |
| Vsx1          | -4.981 | -2.336 | -4.941 | -0.219 | -4.027 | 7.557  | -2.326 | 4.064  | -4.981 | -1.843 | 114889 | VSX1     | NM_054068_2_-1  |
| Afg3l1        | 5.068  | 5.056  | 5.963  | 6.089  | 5.259  | 5.337  | 5.128  | 5.474  | 5.559  | 5.608  | 114896 | NA       | NM_054070_8_+1  |
| Fgfrl1        | -4.653 | -0.994 | -0.417 | -1.218 | -0.117 | -1.373 | -0.894 | -1.664 | 0.663  | -1.308 | 116701 | FGFRL1   | NM_054071_5_+1  |
| Tsga13        | -4.981 | -2.681 | -1.736 | -3.007 | -4.800 | -2.876 | -4.460 | -2.632 | -4.981 | -4.981 | 116732 | TSGA13   | NM_054073_6_-1  |
| Baz2a         | 5.546  | 5.502  | 6.144  | 5.837  | 6.552  | 6.693  | 5.802  | 5.559  | 5.802  | 5.621  | 116848 | BAZ2A    | NM_054078_10_+1 |
| Mta1          | 2.235  | 2.634  | 3.176  | 2.967  | 3.137  | 2.637  | 3.060  | 2.919  | 3.572  | 3.583  | 116870 | MTA1     | NM_054081_12_+1 |
| Mta3          | 5.036  | 4.556  | 4.443  | 4.416  | 5.052  | 4.885  | 4.581  | 4.061  | 4.733  | 4.212  | 116871 | MTA3     | NM_054082_17_+1 |
| Calcb         | -0.118 | -0.892 | -4.478 | -4.987 | -4.981 | -4.981 | -4.981 | -4.981 | -4.981 | -4.981 | 116903 | NA       | NM_054084_7_+1  |
| Alpk3         | -2.948 | -4.981 | -4.956 | -3.684 | -4.718 | -3.837 | -4.973 | -4.414 | -3.043 | -4.227 | 116904 | ALPK3    | NM_054085_7_+1  |
| Slc19a2       | 0.946  | 2.019  | 2.758  | 1.946  | 0.517  | 0.218  | 1.857  | 1.035  | 2.644  | 2.257  | 116914 | SLC19A2  | NM_054087_1_+1  |
| Pnpla3        | -4.981 | -4.981 | -4.552 | -4.948 | -4.255 | -4.828 | -2.628 | -3.573 | -1.839 | -4.981 | 116939 | PNPLA3   | NM_054088_15_+1 |
| Tgs1          | 5.615  | 5.827  | 5.879  | 5.633  | 6.458  | 6.498  | 6.547  | 6.138  | 5.589  | 5.793  | 116940 | TGS1     | NM_054089_4_+1  |
| Ube3b         | 4.523  | 4.159  | 5.538  | 5.472  | 5.545  | 5.450  | 5.448  | 5.666  | 6.399  | 6.314  | 117146 | UBE3B    | NM_054093_5_+1  |
| Necab2        | -4.981 | -4.981 | -4.953 | -4.333 | -4.066 | -3.774 | -4.977 | -4.971 | -4.981 | -4.981 | 117148 | NECAB2   | NM_054095_8_+1  |
| Tirap         | -1.574 | 0.772  | 3.053  | 2.001  | 0.449  | 0.013  | 3.055  | 2.409  | 3.864  | 3.680  | 117149 | TIRAP    | NM_054096_9_-1  |
| Pip4k2c       | 3.509  | 3.549  | 3.745  | 3.935  | 3.849  | 3.926  | 3.675  | 3.696  | 4.359  | 4.234  | 117150 | PIP4K2C  | NM_054097_10_-1 |
| Steap4        | -4.981 | -4.981 | -4.964 | -3.701 | -4.880 | -1.696 | -3.724 | -1.135 | -4.981 | -4.981 | 117167 | STEAP4   | NM_054098_5_+1  |
| 1110038F14Rik | 5.852  | 5.722  | 5.196  | 5.248  | 5.374  | 5.494  | 5.227  | 5.117  | 4.475  | 4.345  | 117171 | C8orf33  | NM_054099_15_+1 |
| Ivns1abp      | 8.532  | 7.306  | 9.043  | 8.985  | 8.522  | 8.844  | 7.851  | 8.193  | 7.065  | 7.381  | 117198 | IVNS1ABP | NM_054102_1_+1  |
| Bag6          | 3.928  | 3.622  | 4.293  | 4.190  | 4.253  | 4.088  | 4.085  | 4.117  | 4.448  | 4.282  | 224727 | BAG6     | NM_057171_17_+1 |
| Fubp1         | 5.912  | 6.086  | 6.178  | 6.307  | 6.488  | 6.559  | 6.168  | 6.013  | 4.525  | 4.825  | 51886  | FUBP1    | NM_057172_3_+1  |
| Lmo1          | -4.981 | -4.981 | -4.938 | -4.678 | -4.981 | -4.981 | -4.645 | -4.959 | -3.456 | -4.981 | 109594 | LMO1     | NM_057173_7_-1  |
| Dpf3          | -4.981 | -4.981 | -4.938 | -4.523 | -4.979 | -4.630 | -4.720 | -4.977 | -2.405 | -2.896 | 70127  | DPF3     | NM_058212_12_-1 |
| Recql4        | -1.544 | -4.981 | 0.312  | -0.559 | 0.630  | 0.096  | -0.177 | -0.084 | 0.442  | -1.042 | 79456  | RECQL4   | NM_058214_15_-1 |
| Klf16         | 1.275  | 0.897  | 1.584  | 1.149  | 1.607  | 1.569  | 1.997  | 1.488  | 1.802  | 1.888  | 118445 | NA       | NM_078477_10_-1 |
| Ghitm         | 8.815  | 8.719  | 8.167  | 8.323  | 8.319  | 8.462  | 8.058  | 8.304  | 7.770  | 7.962  | 66092  | GHITM    | NM_078478_14_-1 |
| Mrps21        | 6.848  | 6.630  | 6.520  | 6.405  | 6.280  | 6.269  | 6.735  | 6.539  | 5.986  | 5.725  | 66292  | MRPS21   | NM_078479_3_-1  |
| Slc35a2       | 3.327  | 3.739  | 2.700  | 2.453  | 2.353  | 2.411  | 1.359  | 1.577  | 1.150  | 1.304  | 22232  | NA       | NM_078484_X_+1  |
| Btnl2         | -2.278 | -4.981 | 0.287  | -0.872 | -0.597 | -2.509 | -0.844 | -1.452 | -2.550 | -1.786 | 547431 | BTNL2    | NM_079835_17_+1 |
| Cttnbp2       | -4.981 | -4.981 | -4.894 | -0.186 | -5.022 | -2.554 | -4.948 | -2.472 | -4.981 | -2.976 | 30785  | CTTNBP2  | NM_080285_6_-1  |
| Elmo2         | 5.036  | 5.024  | 6.324  | 6.120  | 6.995  | 6.986  | 7.440  | 7.519  | 8.773  | 8.712  | 140579 | ELMO2    | NM_080287_2_-1  |
| Elmo1         | 4.851  | 5.262  | 6.978  | 7.127  | 8.276  | 8.287  | 7.657  | 7.466  | 7.038  | 7.171  | 140580 | ELMO1    | NM_080288_13_+1 |
| Grhpr         | 5.921  | 5.477  | 3.426  | 3.426  | 2.949  | 3.081  | 2.594  | 3.384  | 2.630  | 2.621  | 76238  | GRHPR    | NM_080289_4_+1  |
| Igsf8         | 5.926  | 5.269  | 4.146  | 6.045  | 3.676  | 5.746  | 5.187  | 6.680  | 5.439  | 7.097  | 140559 | IGSF8    | NM_080419_1_+1  |
| Lpo           | -2.739 | -3.267 | -2.978 | -2.800 | -3.289 | -4.579 | -2.912 | -4.913 | -4.981 | -4.981 | 76113  | LPO      | NM_080420_11_-1 |
| Fbxw7         | 1.112  | 0.952  | -0.800 | -2.101 | -3.014 | -4.913 | -2.471 | -4.885 | -4.981 | -4.957 | 50754  | FBXW7    | NM_080428_3_+1  |
| Adcy4         | -0.241 | -4.981 | 4.064  | 2.708  | -0.459 | -1.114 | 1.743  | 0.957  | 0.548  | -2.404 | 104110 | ADCY4    | NM_080435_14_-1 |
| Rdh1          | -1.760 | -2.614 | -3.403 | -4.007 | -4.625 | -4.024 | -3.902 | -4.876 | -2.809 | -4.177 | 107605 | RDH16    | NM_080436_10_+1 |
| Celsr3        | -1.784 | -4.981 | -1.672 | -2.187 | -3.422 | -3.927 | -0.858 | -0.577 | 3.661  | 3.172  | 107934 | CELSR3   | NM_080437_9_+1  |
| Tssk3         | -4.981 | -4.981 | -4.463 | -4.909 | -3.124 | -4.864 | -4.717 | -4.949 | -4.981 | -4.981 | 58864  | TSSK3    | NM_080442_4_-1  |
| Asb7          | 1.554  | 1.979  | 1.512  | 0.937  | 1.495  | 1.448  | 2.108  | -0.001 | 2.208  | 2.410  | 117589 | ASB7     | NM_080443_7_-1  |
| B3galt6       | 3.395  | 3.322  | 3.390  | 3.333  | 3.213  | 3.227  | 2.874  | 2.717  | 2.237  | 2.351  | 117592 | B3GALT6  | NM_080445_4_-1  |
| Helb          | 2.761  | 2.942  | 2.791  | 3.121  | 3.207  | 3.215  | 3.890  | 3.615  | 4.222  | 3.975  | 117599 | HELB     | NM_080446_10_-1 |
| Srgap3        | 6.108  | 5.883  | 4.833  | 4.903  | 3.997  | 4.264  | 3.446  | 3.450  | 0.551  | 0.793  | 259302 | SRGAP3   | NM_080448_6_-1  |
| Gjc3          | -4.981 | -2.914 | -3.305 | -4.182 | -4.136 | -4.545 | -4.109 | -4.830 | -4.117 | -4.193 | 118446 | GJC3     | NM_080450_5_-1  |
| Synpo2        | -0.567 | -1.075 | 3.230  | 3.349  | 0.883  | 2.805  | 1.301  | 0.056  | -2.957 | -4.981 | 118449 | SYNPO2   | NM_080451_3_-1  |
| Mrps2         | 4.798  | 4.747  | 4.819  | 4.884  | 4.810  | 4.683  | 4.865  | 4.813  | 4.714  | 4.591  | 118451 | MRPS2    | NM_080452_2_+1  |
| Mmp28         | -4.406 | -4.981 | 2.196  | 1.735  | -4.652 | -4.796 | -2.762 | -4.487 | -0.218 | -1.990 | 118453 | MMP28    | NM_080453_11_-1 |
| Mrps6         | 6.317  | 6.318  | 4.754  | 4.779  | 5.047  | 4.840  | 4.634  | 4.360  | 2.199  | 2.741  | 121022 | MRPS6    | NM_080456_16_+1 |
| Zfp358        | 3.619  | 3.555  | 2.949  | 2.760  | 2.676  | 2.528  | 2.726  | 3.106  | 3.759  | 3.693  | 140482 | ZNF358   | NM_080461_8_+1  |
| Hnmt          | -4.981 | -2.997 | -2.945 | -2.063 | -1.780 | -0.681 | 1.116  | 1.379  | 2.762  | 3.942  | 140483 | HNMT     | NM_080462_2_-1  |
| Pofut1        | 3.623  | 3.404  | 3.617  | 4.471  | 3.585  | 3.976  | 3.888  | 4.047  | 4.293  | 4.657  | 140484 | POFUT1   | NM_080463_2_+1  |
| Kcnn3         | -4.981 | -4.981 | -4.817 | -4.981 | -4.832 | -4.575 | -4.956 | -4.939 | -4.981 | -4.981 | 140493 | KCNN3    | NM_080466_3_+1  |
| Eri3          | 3.093  | 3.239  | 1.963  | 1.942  | 1.944  | 2.209  | 1.901  | 2.211  | 2.815  | 2.255  | 140546 | ERI3     | NM_080469_4_+1  |
| Smc1b         | -2.739 | -0.499 | -0.847 | -1.921 | -2.156 | -2.547 | -1.952 | -1.533 | -2.736 | -1.305 | 140557 | SMC1B    | NM_080470_15_-1 |
| Ankrd6        | -4.981 | -4.981 | -4.663 | -4.690 | -4.646 | -4.881 | -4.844 | -4.963 | -4.832 | -4.500 | 140577 | ANKRD6   | NM_080471_4_-1  |
| Trim69        | -1.835 | -4.981 | -1.686 | -4.330 | -4.785 | -4.933 | -2.734 | -4.827 | -3.189 | -3.510 | 70928  | TRIM69   | NM_080510_2_+1  |
| Itp3          | 4.394  | 4.159  | 3.329  | 3.544  | 5.082  | 4.919  | 4.226  | 3.965  | 1.953  | 1.768  | 16440  | ITPR3    | NM_080553_17_+1 |
| Psm5          | 5.840  | 6.120  | 5.708  | 5.828  | 5.786  | 5.923  | 5.618  | 5.835  | 5.372  | 5.519  | 66998  | PSMD5    | NM_080554_2_-1  |
| Plpp3         | 1.913  | -0.738 | 0.022  | 1.156  | 0.905  | 1.394  | -0.259 | 2.420  | -3.189 | -0.771 | 67916  | PLPP3    | NM_080555_4_+1  |
| Tm9sf2        | 7.805  | 7.719  | 9.010  | 8.756  | 7.837  | 7.630  | 7.795  | 7.779  | 7.757  | 8.227  | 68059  | TM9SF2   | NM_080556_14_+1 |
| Snx4          | 6.767  | 6.769  | 6.446  | 6.538  | 6.118  | 6.270  | 6.197  | 6.368  | 6.541  | 6.607  | 69150  | SNX4     | NM_080557_16_+1 |
| Ssfa2         | 5.596  | 5.866  | 5.483  | 5.331  | 5.068  | 5.129  | 5.169  | 4.746  | 5.264  | 5.809  | 70599  | SSFA2    | NM_080558_2_+1  |

|          |        |        |        |        |        |        |        |        |        |        |        |          |                 |
|----------|--------|--------|--------|--------|--------|--------|--------|--------|--------|--------|--------|----------|-----------------|
| Sh3bgrl3 | 10.541 | 9.507  | 11.062 | 9.562  | 10.921 | 9.450  | 10.982 | 9.516  | 9.950  | 8.798  | 73723  | SH3BGRl3 | NM_080559_4_-1  |
| Ube2n    | 7.619  | 7.517  | 8.301  | 8.322  | 7.868  | 7.662  | 7.541  | 7.467  | 6.852  | 6.885  | 93765  | UBE2N    | NM_080560_10_+1 |
| Rnf216   | 3.218  | 3.497  | 4.761  | 4.838  | 5.027  | 5.042  | 4.948  | 4.837  | 5.170  | 5.276  | 108086 | RNF216   | NM_080561_5_-1  |
| Ubox5    | -4.370 | -4.314 | -2.096 | -0.580 | -3.654 | -4.896 | -4.450 | -4.886 | -4.712 | -4.811 | 140629 | UBOX5    | NM_080562_2_-1  |
| Rnf144a  | 0.741  | 2.916  | -0.968 | -0.656 | -0.246 | 1.701  | 1.982  | 3.785  | 4.414  | 5.391  | 108089 | RNF144A  | NM_080563_12_-1 |
| Acss1    | 4.230  | 5.004  | 4.732  | 3.241  | 5.429  | 6.179  | 6.385  | 6.300  | 6.016  | 4.505  | 68738  | ACSS1    | NM_080575_2_-1  |
| Emid1    | 4.636  | 4.784  | -2.344 | -0.678 | -2.567 | 0.186  | -0.062 | 1.984  | -4.981 | -2.161 | 140703 | EMID1    | NM_080595_11_-1 |
| Aco2     | 6.392  | 6.455  | 6.767  | 6.920  | 6.695  | 6.841  | 6.522  | 6.811  | 6.972  | 7.062  | 11429  | ACO2     | NM_080633_15_+1 |
| Hps3     | 4.870  | 4.521  | 7.140  | 7.174  | 6.994  | 7.245  | 6.873  | 6.828  | 7.505  | 7.660  | 12807  | HPS3     | NM_080634_3_-1  |
| Eif3h    | 8.208  | 8.169  | 8.338  | 8.264  | 7.831  | 7.749  | 7.818  | 7.894  | 7.869  | 7.763  | 68135  | EIF3H    | NM_080635_15_-1 |
| Hars2    | 4.232  | 4.281  | 4.538  | 4.689  | 4.386  | 4.672  | 4.410  | 4.673  | 4.900  | 4.883  | 70791  | HARS2    | NM_080636_18_+1 |
| Mvp      | 6.026  | 5.994  | 7.058  | 7.286  | 7.132  | 7.104  | 7.160  | 7.008  | 7.361  | 7.386  | 78388  | MVP      | NM_080638_7_-1  |
| Caskin2  | -1.157 | -1.789 | 2.275  | 2.163  | 1.623  | 0.114  | 1.395  | -0.534 | 0.337  | -1.303 | 140721 | CASKIN2  | NM_080643_11_-1 |
| Bmp2k    | 5.850  | 5.274  | 6.318  | 5.535  | 6.506  | 5.875  | 5.747  | 4.949  | 5.039  | 4.732  | 140780 | BMP2K    | NM_080708_5_+1  |
| Rem2     | -0.951 | -2.133 | -3.106 | -2.711 | -1.150 | -1.513 | -1.730 | -3.758 | -3.738 | -4.981 | 140743 | REM2     | NM_080726_14_+1 |
| Tmprss3  | -4.981 | -4.981 | -4.855 | -3.600 | -4.923 | -1.219 | -4.528 | -3.038 | -4.981 | -4.981 | 140765 | TMPRSS3  | NM_080727_17_-1 |
| Myh7     | -4.981 | -3.408 | -3.673 | -4.947 | -4.349 | -4.887 | -2.469 | -4.946 | -4.981 | -4.981 | 140781 | MYH7     | NM_080728_14_-1 |
| Ttbk2    | 1.944  | 1.766  | 0.976  | 1.051  | -0.247 | 1.166  | 0.573  | 1.014  | -3.182 | 1.956  | 140810 | TTBK2    | NM_080788_2_-1  |
| Setd7    | 4.603  | 4.639  | 4.064  | 3.834  | 3.819  | 3.842  | 3.655  | 3.070  | 2.837  | 2.805  | 73251  | SETD7    | NM_080793_3_-1  |
| Lnx2     | 2.634  | 3.036  | 3.959  | 3.837  | 3.510  | 3.187  | 2.774  | 2.673  | 2.254  | 2.204  | 140887 | LNK2     | NM_080795_5_-1  |
| Mydgf    | 7.088  | 6.933  | 5.834  | 5.887  | 5.523  | 5.479  | 5.721  | 5.896  | 5.392  | 5.481  | 28106  | MYDGF    | NM_080837_17_-1 |
| Socs4    | 3.941  | 3.923  | 3.787  | 3.540  | 3.695  | 3.733  | 3.432  | 3.422  | 3.235  | 3.004  | 67296  | SOC4     | NM_080843_14_+1 |
| Serpinc1 | 4.507  | 2.774  | 1.097  | 1.748  | 1.374  | 0.220  | -1.320 | -3.016 | -3.471 | -1.920 | 11905  | SERPINC1 | NM_080844_1_+1  |
| Wdr5     | 4.232  | 4.179  | 4.497  | 4.685  | 4.437  | 4.538  | 4.558  | 4.817  | 5.128  | 4.704  | 140858 | WDR5     | NM_080848_2_+1  |
| Nek8     | 2.426  | 2.845  | 2.432  | 2.695  | 2.734  | 2.799  | 1.811  | 2.321  | 1.481  | 1.810  | 140859 | NEK8     | NM_080849_11_-1 |
| Pask     | -4.981 | -2.616 | 0.358  | 0.614  | 1.415  | 0.293  | 0.298  | 0.432  | 0.076  | -1.173 | 269224 | PASK     | NM_080850_1_-1  |
| Slc34a3  | -4.981 | -4.981 | -4.981 | -4.981 | -4.938 | -1.046 | -4.953 | -4.198 | -4.981 | -4.981 | 142681 | SLC34A3  | NM_080854_2_-1  |
| Zcchc14  | -1.241 | -1.991 | -0.544 | -1.813 | -3.110 | -3.683 | -2.052 | -1.318 | -2.549 | -1.063 | 142682 | ZCCHC14  | NM_080855_8_-1  |
| Asb14    | -3.090 | -2.883 | -4.584 | -4.402 | -4.581 | -4.874 | -4.428 | -4.585 | -3.750 | -4.048 | 142687 | ASB14    | NM_080856_14_+1 |
| Vps4a    | 5.704  | 5.963  | 5.598  | 5.565  | 5.532  | 5.618  | 5.590  | 5.707  | 5.893  | 5.932  | 116733 | VPS4A    | NM_126165_8_+1  |
| Tlr3     | -0.603 | -4.981 | 7.694  | 7.759  | 2.333  | 2.479  | 2.783  | 4.631  | 1.392  | 1.736  | 142980 | TLR3     | NM_126166_8_-1  |
| Dusp16   | 1.305  | -4.981 | 2.795  | 0.881  | 3.121  | 3.003  | 3.973  | 2.089  | 2.770  | 1.738  | 70686  | DUSP16   | NM_130447_6_-1  |
| Pcdh18   | -4.981 | -4.981 | -4.953 | -4.358 | -4.795 | -4.972 | -4.981 | -4.981 | -2.839 | -4.981 | 73173  | PCDH18   | NM_130448_3_-1  |
| Colec12  | -2.730 | -1.739 | -1.947 | -1.131 | -2.122 | 0.031  | 0.420  | 4.895  | 3.133  | 7.869  | 140792 | COLEC12  | NM_130449_18_+1 |
| Elov16   | 4.681  | 5.137  | 3.007  | 2.909  | 1.086  | 0.545  | 2.405  | 2.704  | 3.073  | 3.208  | 170439 | ELOVL6   | NM_130450_3_+1  |
| Slc2a10  | -4.981 | -4.981 | -4.941 | -4.941 | -2.561 | -1.979 | -3.334 | -4.458 | -1.973 | -1.408 | 170441 | SLC2A10  | NM_130451_2_+1  |
| Recql5   | 4.575  | 4.277  | 3.685  | 3.747  | 4.305  | 4.320  | 3.906  | 3.734  | 4.430  | 4.233  | 170472 | RECQL5   | NM_130454_11_-1 |
| Grin3b   | -1.047 | 0.335  | -3.627 | -4.302 | -2.103 | -3.470 | -0.970 | -1.374 | -2.122 | -0.860 | 170483 | GRIN3B   | NM_130455_10_+1 |
| Nphs2    | -4.981 | -0.945 | -4.928 | -2.698 | -4.546 | 0.591  | -4.979 | -2.940 | -4.981 | -2.993 | 170484 | NPHS2    | NM_130456_1_+1  |
| Snx18    | 7.457  | 7.854  | 4.688  | 4.563  | 3.647  | 3.324  | 5.334  | 5.678  | 6.637  | 7.057  | 170625 | SNX18    | NM_130796_13_-1 |
| Nxph3    | -4.981 | -4.981 | -3.602 | -4.954 | -4.705 | -4.968 | -4.596 | -4.971 | -4.981 | -4.981 | 104079 | NXPH3    | NM_130858_11_-1 |
| Card10   | -2.362 | -1.063 | 3.255  | 2.495  | 1.685  | 0.959  | 2.033  | 1.536  | 3.043  | 1.978  | 105844 | CARD10   | NM_130859_15_-1 |
| Cdk9     | 7.422  | 7.563  | 7.373  | 7.420  | 7.600  | 7.665  | 7.547  | 7.539  | 7.859  | 7.697  | 107951 | CDK9     | NM_130860_2_-1  |
| Baiap2   | 1.090  | 2.233  | 2.275  | 2.040  | 1.731  | 2.767  | 1.075  | 0.595  | -0.160 | -0.177 | 108100 | BAIAP2   | NM_130862_11_+1 |
| Adrbk1   | -0.420 | -2.805 | -1.334 | -0.038 | 0.600  | 0.137  | -1.272 | -0.261 | 1.083  | 0.823  | 110355 | NA       | NM_130863_19_-1 |
| Acaa1a   | 7.226  | 7.128  | 6.997  | 6.968  | 7.032  | 7.183  | 6.953  | 7.040  | 7.466  | 7.244  | 113868 | ACAA1    | NM_130864_9_+1  |
| Kirrel   | -4.981 | -4.981 | -4.950 | -4.163 | -4.944 | -4.944 | -4.971 | -4.946 | -4.981 | -4.981 | 170643 | KIRREL   | NM_130867_3_-1  |
| Cdhr1    | 0.716  | -4.981 | -1.759 | -2.196 | 1.090  | 2.527  | -2.149 | -0.538 | -4.981 | -2.598 | 170677 | CDHR1    | NM_130878_14_-1 |
| Usp48    | 4.997  | 5.180  | 5.664  | 5.517  | 6.416  | 6.511  | 5.986  | 5.525  | 5.444  | 5.684  | 170707 | USP48    | NM_130879_4_+1  |
| Pabpc4   | 2.482  | 2.698  | 1.762  | 2.897  | 2.239  | 2.428  | 2.286  | 2.426  | 1.586  | 1.918  | 230721 | PABPC4   | NM_130881_4_+1  |
| Cyp4f13  | 5.621  | 6.136  | 4.224  | 4.362  | 5.130  | 5.459  | 5.134  | 5.151  | 4.736  | 5.057  | 170716 | CYP4F3   | NM_130882_17_-1 |
| Idh3b    | 6.839  | 6.796  | 6.677  | 6.715  | 6.873  | 6.872  | 6.747  | 6.874  | 6.544  | 6.552  | 170718 | IDH3B    | NM_130884_2_-1  |
| Oxr1     | 2.007  | 1.295  | -2.529 | -1.348 | -0.083 | 0.089  | -1.483 | 0.507  | 2.072  | 3.102  | 170719 | OXR1     | NM_130885_15_+1 |
| Card14   | -3.683 | -2.754 | -2.105 | -1.253 | -4.979 | -4.955 | -4.682 | -4.953 | -4.981 | -4.981 | 170720 | CARD14   | NM_130886_11_+1 |
| Nxf7     | -4.981 | -4.981 | -4.835 | -4.876 | -4.947 | -3.785 | -4.936 | -4.958 | -4.981 | -1.906 | 170722 | NA       | NM_130888_X_-1  |
| Anp32b   | 7.077  | 7.070  | 7.264  | 7.415  | 7.679  | 7.684  | 7.268  | 7.374  | 6.411  | 6.315  | 67628  | NA       | NM_130889_4_+1  |
| Rtn4ip1  | 3.616  | 3.809  | 3.713  | 3.807  | 3.913  | 3.988  | 3.490  | 3.772  | 3.872  | 3.747  | 170728 | RTN4IP1  | NM_130892_10_+1 |
| Adarb1   | -3.903 | -2.549 | -4.055 | -2.001 | -2.719 | -2.446 | -2.649 | -3.075 | -3.358 | -1.707 | 110532 | ADARB1   | NM_130895_10_-1 |
| Cd209c   | 4.940  | 5.424  | 1.640  | 1.185  | 1.651  | 1.724  | 3.403  | 4.012  | 0.729  | 1.486  | 170776 | NA       | NM_130903_8_-1  |
| Cd209d   | 10.426 | 11.638 | 5.469  | 5.351  | 0.174  | 2.327  | 3.765  | 5.637  | 1.250  | 0.158  | 170779 | NA       | NM_130904_8_-1  |
| Cd209e   | 3.896  | 3.593  | 3.817  | 3.858  | -1.616 | -0.435 | 0.757  | 3.305  | -0.770 | -3.011 | 170780 | CD209    | NM_130905_8_-1  |
| Parvb    | -1.894 | -4.981 | -1.963 | -0.004 | -1.704 | -0.419 | 0.855  | 1.520  | 2.152  | 2.219  | 170736 | PARVB    | NM_133167_15_+1 |
| Prmt2    | 3.137  | 3.869  | 2.134  | 3.384  | 2.421  | 2.644  | 0.846  | 2.733  | 0.511  | 2.410  | 15468  | PRMT2    | NM_133182_10_-1 |
| Cacng6   | -2.948 | -0.614 | -3.674 | -3.812 | -4.862 | -4.965 | -4.716 | -4.795 | -4.981 | -4.981 | 54378  | CACNG6   | NM_133183_7_+1  |
| Rogdi    | 8.994  | 8.520  | 8.372  | 8.765  | 10.251 | 10.292 | 9.327  | 8.756  | 6.175  | 6.033  | 66049  | ROGDI    | NM_133185_16_-1 |
| Steap3   | -3.843 | -4.981 | -1.791 | 0.342  | -2.189 | 0.272  | -0.743 | 1.909  | 3.292  | 3.842  | 68428  | STEAP3   | NM_133186_1_-1  |
| Fam198b  | 0.913  | 0.709  | -1.499 | -1.073 | 0.448  | -0.700 | -0.115 | -0.442 | -0.372 | -0.102 | 68659  | FAM198B  | NM_133187_3_+1  |
| Dazap1   | 4.640  | 4.158  | 4.460  | 4.438  | 4.458  | 4.253  | 4.286  | 4.008  | 4.118  | 3.826  | 70248  | NA       | NM_133188_10_+1 |
| Cacng8   | -4.981 | -4.981 | -2.240 | -2.187 | -1.025 | -1.976 | -4.327 | -4.581 | -4.981 | -4.981 | 81905  | CACNG8   | NM_133190_7_+1  |
| Eps8l2   | 1.407  | 1.231  | 0.248  | 0.933  | 2.096  | 1.449  | -0.680 | -3.687 | -4.981 | -4.981 | 98845  | EPS8L2   | NM_133191_7_+1  |
| Il1rl2   | 1.631  | 1.427  | -1.697 | 0.470  | -3.744 | -1.773 | -1.517 | 0.974  | 0.236  | 0.863  | 107527 | IL1RL2   | NM_133193_1_+1  |
| Celf4    | -0.738 | -3.116 | -1.135 | -2.276 | -0.924 | -3.860 | -1.502 | 1.478  | -3.414 | 0.558  | 108013 | CELF4    | NM_133195_18_-1 |
| Cstf2    | 4.613  | 4.438  | 5.252  | 5.208  | 3.747  | 3.608  | 4.122  | 4.256  | 3.759  | 3.984  | 108062 | CSTF2    | NM_133196_X_+1  |
| Pygl     | 1.560  | -0.807 | 3.018  | 3.645  | 6.313  | 6.074  | 6.244  | 5.849  | 8.793  | 8.198  | 110095 | PYGL     | NM_133198_12_-1 |

|          |        |        |        |        |        |        |        |        |        |        |        |                  |                 |
|----------|--------|--------|--------|--------|--------|--------|--------|--------|--------|--------|--------|------------------|-----------------|
| Scn4a    | -3.668 | -4.981 | -4.792 | -4.962 | -2.841 | -2.581 | -1.344 | -0.311 | -4.190 | -3.797 | 110880 | SCN4A            | NM_133199_11_-1 |
| P2ry14   | 3.197  | 2.810  | 3.676  | 3.481  | -4.937 | -3.712 | 0.241  | 1.256  | 0.140  | 1.105  | 140795 | P2RY14           | NM_133200_3_-1  |
| Mfn2     | 2.569  | 2.106  | 3.557  | 2.976  | 3.822  | 3.616  | 3.320  | 3.485  | 4.562  | 4.020  | 170731 | MFN2             | NM_133201_4_-1  |
| Klra17   | 9.506  | 10.119 | 4.435  | 5.269  | 2.835  | 7.196  | 3.752  | 7.164  | 0.475  | 3.724  | 170733 | NA               | NM_133203_6_-1  |
| Znrf1    | 4.590  | 4.386  | 3.472  | 3.312  | 4.722  | 4.558  | 4.190  | 3.942  | 5.511  | 5.293  | 170737 | ZNRF1            | NM_133206_8_+1  |
| Zfp287   | 1.420  | 1.159  | 2.308  | 2.042  | 1.988  | 1.806  | 1.784  | 1.675  | 0.865  | 1.941  | 170740 | ZNF287           | NM_133208_11_-1 |
| Pilrb1   | 3.275  | 1.459  | 1.650  | 1.838  | 4.108  | 4.754  | 5.752  | 6.339  | 6.010  | 6.347  | 170741 | PILRB            | NM_133209_5_-1  |
| Sertad3  | 5.837  | 5.705  | 3.240  | 3.465  | 3.732  | 3.571  | 3.892  | 3.941  | 4.794  | 4.510  | 170742 | SERTAD3          | NM_133210_7_+1  |
| Tlr7     | 6.516  | 6.423  | 0.820  | 1.225  | 5.074  | 5.427  | 4.907  | 5.474  | 7.082  | 7.421  | 170743 | TLR7             | NM_133211_X_-1  |
| Tlr8     | -2.075 | -4.981 | -1.781 | -3.115 | -0.724 | -2.267 | 3.384  | 4.031  | 5.726  | 6.476  | 170744 | TLR8             | NM_133212_X_-1  |
| Xpnpep2  | -4.981 | -2.097 | -3.950 | -3.518 | -3.515 | -3.503 | -3.690 | -4.025 | -4.190 | -3.461 | 170745 | XPNPEP2          | NM_133213_X_+1  |
| Smco4    | 0.571  | 0.534  | 1.577  | 1.613  | -0.170 | 0.582  | -0.248 | 0.143  | -0.422 | 0.052  | 170748 | NA               | NM_133214_9_+1  |
| Mtmr4    | 3.549  | 3.737  | 7.409  | 7.392  | 6.205  | 6.285  | 5.737  | 5.660  | 5.124  | 5.376  | 170749 | MTMR4            | NM_133215_11_+1 |
| Xpnpep1  | 5.087  | 5.110  | 5.661  | 5.996  | 6.091  | 6.146  | 5.762  | 6.017  | 6.154  | 6.324  | 170750 | XPNPEP1          | NM_133216_19_-1 |
| Bco2     | 0.485  | -0.652 | 3.021  | 1.906  | 2.510  | 1.015  | 2.678  | 1.536  | 2.120  | 1.015  | 170752 | BCO2             | NM_133217_9_-1  |
| Zfp704   | 0.910  | 1.465  | 0.977  | 1.412  | 1.100  | 0.342  | 2.315  | 1.899  | 2.569  | 2.984  | 170753 | ZNF704           | NM_133218_3_-1  |
| Gcnt2    | 2.364  | -0.454 | 4.376  | 2.391  | 5.728  | 5.214  | 6.004  | 4.941  | 6.764  | 6.720  | 14538  | GCNT2            | NM_133219_13_+1 |
| Sgk3     | 5.758  | 4.959  | 6.753  | 5.412  | 6.755  | 5.672  | 7.029  | 6.142  | 7.602  | 6.210  | 170755 | C8orf44-SGK3 SGK | NM_133220_1_+1  |
| Slc8b1   | 3.854  | 4.103  | 7.782  | 7.650  | 4.091  | 4.037  | 4.504  | 5.225  | 6.538  | 6.225  | 170756 | SLC8B1           | NM_133221_5_+1  |
| Adgrl4   | 1.110  | -0.065 | -3.865 | -3.100 | -4.721 | -2.617 | -3.198 | 0.083  | 1.862  | 2.572  | 170757 | ADGRL4           | NM_133222_3_+1  |
| Rac3     | -0.898 | -2.340 | 1.080  | 0.693  | 0.097  | -0.526 | -0.230 | 0.582  | -0.044 | 0.094  | 170758 | RAC3             | NM_133223_11_+1 |
| Atp13a1  | 5.141  | 4.933  | 5.733  | 5.671  | 5.718  | 5.628  | 5.497  | 5.893  | 6.679  | 6.580  | 170759 | ATP13A1          | NM_133224_8_+1  |
| Acbd3    | 5.175  | 5.364  | 5.702  | 5.773  | 5.267  | 5.545  | 5.711  | 5.825  | 5.767  | 6.086  | 170760 | ACBD3            | NM_133225_1_+1  |
| Pdzd3    | -3.349 | -4.981 | -4.952 | -4.205 | -3.899 | -4.300 | -3.466 | -4.447 | -1.381 | -1.226 | 170761 | PDZD3            | NM_133226_9_-1  |
| Nup155   | 3.017  | 3.058  | 3.580  | 3.485  | 3.834  | 4.053  | 3.797  | 3.666  | 3.540  | 3.717  | 170762 | NUP155           | NM_133227_15_+1 |
| Zfp87    | 3.619  | 3.416  | 4.101  | 3.820  | 4.094  | 4.220  | 4.194  | 4.159  | 4.501  | 4.538  | 170763 | NA               | NM_133228_13_-1 |
| Ripply3  | -3.668 | -1.634 | -0.493 | -0.828 | -2.254 | -2.275 | -2.382 | -2.090 | -1.787 | -1.929 | 170765 | RIPPLY3          | NM_133229_16_+1 |
| Rfxap    | 5.775  | 5.660  | 6.195  | 5.884  | 5.454  | 5.189  | 5.299  | 5.217  | 4.802  | 4.890  | 170767 | RFXAP            | NM_133231_3_-1  |
| Pfkfb3   | -1.226 | -3.586 | 4.834  | 5.065  | 5.129  | 4.603  | 5.064  | 3.809  | 3.864  | 3.269  | 170768 | PFKFB3           | NM_133232_2_-1  |
| Bbc3     | 2.959  | 2.805  | 3.433  | 3.382  | 3.377  | 3.323  | 3.657  | 3.865  | 4.975  | 4.784  | 170770 | BBC3             | NM_133234_7_+1  |
| Glicc1   | 3.815  | 3.625  | 2.088  | 1.430  | 2.146  | 0.624  | 1.118  | 0.967  | 0.814  | -1.322 | 170772 | GLCC1            | NM_133236_6_+1  |
| Apcdd1   | -2.013 | -1.696 | -3.767 | -3.728 | -4.554 | -4.486 | -3.298 | -4.377 | -0.739 | 0.908  | 494504 | APCDD1           | NM_133237_18_+1 |
| Cd209a   | 10.350 | 11.113 | 6.225  | 6.119  | 7.718  | 8.487  | 9.489  | 9.882  | 6.262  | 4.168  | 170786 | CLEC4M           | NM_133238_8_-1  |
| Acot8    | 4.798  | 4.936  | 4.583  | 4.927  | 4.551  | 4.497  | 4.378  | 4.341  | 4.504  | 4.696  | 170789 | ACOT8            | NM_133240_2_-1  |
| Rbm39    | 7.760  | 8.144  | 7.641  | 7.744  | 8.070  | 8.136  | 7.953  | 7.820  | 7.491  | 7.817  | 170791 | RBM39            | NM_133242_2_-1  |
| Ms4a3    | -4.981 | -4.981 | -4.935 | -1.921 | -4.565 | 1.434  | 0.276  | 1.713  | 3.332  | -4.342 | 170813 | MS4A3            | NM_133246_19_-1 |
| Usp33    | 2.436  | 2.265  | 4.023  | 4.108  | 3.483  | 3.964  | 3.993  | 3.975  | 4.284  | 4.827  | 170822 | USP33            | NM_133247_3_+1  |
| Glmn     | 3.207  | 3.607  | 2.532  | 2.647  | 1.982  | 2.746  | 2.261  | 2.460  | 1.135  | 1.933  | 170823 | GLMN             | NM_133248_5_-1  |
| Ppargc1b | 0.637  | 0.092  | -1.009 | -0.009 | -2.880 | -1.674 | -0.252 | 1.226  | 1.958  | 2.042  | 170826 | PPARGC1B         | NM_133249_18_-1 |
| Mutyh    | 2.617  | 2.437  | 1.238  | 1.124  | 2.109  | 1.797  | 1.429  | 0.673  | 0.482  | -0.698 | 70603  | MUTYH            | NM_133250_4_+1  |
| Slc5a2   | -4.981 | -4.981 | -4.603 | -4.256 | -4.745 | -3.917 | -4.222 | -4.264 | -4.981 | -4.098 | 246787 | SLC5A2           | NM_133254_7_+1  |
| Hook2    | 1.079  | 1.203  | 2.173  | 1.713  | 2.174  | 1.783  | 1.833  | 1.656  | 1.916  | 2.001  | 170833 | HOOK2            | NM_133255_8_+1  |
| Ing4     | 6.380  | 6.499  | 6.351  | 6.524  | 6.203  | 6.540  | 6.262  | 6.535  | 6.241  | 6.719  | 28019  | ING4             | NM_133345_6_+1  |
| Asb6     | 4.382  | 4.566  | 4.673  | 4.691  | 4.676  | 4.708  | 4.407  | 4.668  | 5.162  | 4.982  | 72323  | ASB6             | NM_133346_2_-1  |
| Dhx30    | 3.689  | 3.778  | 3.973  | 3.550  | 4.297  | 3.948  | 4.001  | 2.268  | 4.398  | 4.253  | 72831  | DHX30            | NM_133347_9_-1  |
| Acot7    | 2.230  | 2.008  | 4.878  | 5.473  | 6.906  | 7.003  | 5.966  | 5.356  | 3.840  | 4.386  | 70025  | ACOT7            | NM_133348_4_+1  |
| Zfand2a  | 1.751  | 2.369  | 2.012  | 1.884  | 2.301  | 1.903  | 2.316  | 2.640  | 2.875  | 3.031  | 100494 | ZFAND2A          | NM_133349_5_-1  |
| Mapre3   | 0.388  | 0.806  | 0.485  | 1.447  | 0.564  | 1.107  | -0.428 | 0.023  | 0.837  | 1.446  | 100732 | MAPRE3           | NM_133350_5_+1  |
| Prss8    | -2.118 | -2.997 | -4.733 | -4.613 | -4.395 | -4.501 | -4.393 | -4.652 | -2.865 | -3.758 | 76560  | PRSS8            | NM_133351_7_-1  |
| Tm9sf3   | 7.487  | 7.572  | 7.995  | 7.930  | 7.689  | 7.760  | 7.848  | 7.978  | 8.489  | 8.939  | 107358 | TM9SF3           | NM_133352_19_-1 |
| Oosp1    | -4.981 | -4.981 | -1.315 | -2.237 | -4.014 | -2.460 | -1.486 | -0.828 | -3.925 | -4.981 | 170834 | NA               | NM_133353_19_-1 |
| Sumo2    | 9.682  | 9.646  | 8.889  | 8.906  | 9.139  | 9.022  | 8.889  | 8.765  | 7.676  | 7.804  | 170930 | SUMO2            | NM_133354_11_-1 |
| Zfp617   | 3.250  | 3.403  | 3.853  | 3.557  | 3.787  | 3.869  | 3.920  | 3.925  | 4.119  | 4.467  | 170938 | ZNF878           | NM_133358_8_+1  |
| Acaca    | 3.205  | 3.287  | 3.760  | 3.654  | 3.444  | 3.381  | 3.587  | 3.474  | 3.352  | 3.442  | 107476 | ACACA            | NM_133360_11_+1 |
| Erd1     | 5.038  | 4.586  | 2.353  | 4.048  | 2.745  | 4.994  | 2.128  | 4.637  | 2.608  | 2.950  | 170942 | NA               | NM_133362_Y_+1  |
| Myoz3    | -4.981 | -1.578 | -2.942 | -3.529 | -2.532 | -4.342 | -2.427 | -3.751 | -3.810 | -4.981 | 170947 | MYOZ3            | NM_133363_18_-1 |
| Prima1   | -4.981 | -4.981 | -4.981 | -4.841 | -4.981 | -4.981 | -4.900 | -4.701 | -4.981 | -4.981 | 170952 | PRIMA1           | NM_133364_12_-1 |
| Dnah5    | -4.981 | -4.981 | -4.981 | -4.981 | -4.967 | -4.861 | -4.967 | -4.974 | -4.981 | -4.981 | 110082 | DNAH5            | NM_133365_15_+1 |
| Nmnat1   | 2.706  | 3.245  | 2.561  | 2.922  | 2.551  | 2.902  | 1.807  | 1.935  | 1.384  | 1.892  | 66454  | NMNAT1           | NM_133435_4_-1  |
| Ppp1r14c | -4.981 | -3.408 | -4.914 | -4.738 | -4.987 | -4.294 | -4.961 | -4.047 | -4.981 | -3.853 | 76142  | PPP1R14C         | NM_133485_10_+1 |
| Ntng2    | -1.051 | -2.533 | -0.589 | -1.137 | -1.283 | -1.272 | -2.263 | -1.964 | -4.285 | -1.425 | 171171 | NTNG2            | NM_133500_2_-1  |
| Ntng2    | -4.591 | -4.555 | 0.486  | -0.390 | -0.206 | -0.138 | -1.259 | -0.693 | 2.043  | 1.056  | 171171 | NTNG2            | NM_133501_2_-1  |
| Rrbp1    | 5.065  | 4.565  | 3.926  | 3.918  | 3.532  | 3.728  | 4.265  | 3.997  | 3.530  | 3.306  | 81910  | NA               | NM_133626_2_-1  |
| Rtkn     | -4.981 | -4.981 | -4.918 | -3.806 | -4.981 | -4.981 | -4.968 | -4.975 | -4.981 | -4.981 | 20166  | RTKN             | NM_133641_6_+1  |
| Edaradd  | -4.981 | -0.710 | -4.784 | -1.321 | -2.332 | 0.225  | -0.552 | 2.134  | -2.736 | -1.591 | 171211 | EDARADD          | NM_133643_13_-1 |
| Slc12a6  | 2.954  | 3.109  | -0.075 | 1.386  | 1.175  | -0.871 | 4.154  | 3.834  | 4.600  | 5.600  | 107723 | SLC12A6          | NM_133648_2_+1  |
| Slc12a6  | 5.047  | 5.025  | 4.880  | 4.363  | 6.074  | 5.952  | 5.862  | 5.980  | 7.202  | 7.136  | 107723 | SLC12A6          | NM_133649_2_+1  |
| Cd34     | -2.388 | -1.991 | 0.048  | 0.367  | 1.696  | 1.616  | 1.408  | 1.254  | 1.156  | -0.558 | 12490  | CD34             | NM_133654_1_+1  |
| Cd81     | 5.131  | 2.425  | 9.694  | 9.559  | 6.871  | 6.475  | 7.593  | 8.175  | 3.185  | 4.044  | 12520  | CD81             | NM_133655_7_+1  |
| Crk      | 5.070  | 4.952  | 5.677  | 5.423  | 5.778  | 5.505  | 6.114  | 6.076  | 7.276  | 7.173  | 12928  | CRK              | NM_133656_11_+1 |
| Erc3     | 3.901  | 4.047  | 4.294  | 4.425  | 4.261  | 4.321  | 4.143  | 3.972  | 4.164  | 4.210  | 13872  | ERCC3            | NM_133658_18_+1 |
| Erg      | -4.649 | -4.981 | -4.934 | -4.903 | -4.875 | -4.955 | -4.883 | -4.909 | -4.730 | -4.981 | 13876  | ERG              | NM_133659_16_-1 |
| Slc6a12  | -4.981 | -4.981 | 1.498  | 1.185  | 5.051  | 4.881  | 3.113  | 1.288  | 1.128  | -1.694 | 14411  | SLC6A12          | NM_133661_6_+1  |
| Ier3     | 2.902  | 3.416  | 4.374  | 4.503  | 6.958  | 7.753  | 6.551  | 5.365  | 4.376  | 4.451  | 15937  | IER3             | NM_133662_17_+1 |

|               |        |        |        |        |        |        |        |        |        |        |        |              |                  |
|---------------|--------|--------|--------|--------|--------|--------|--------|--------|--------|--------|--------|--------------|------------------|
| Itgb4         | 0.001  | -1.267 | -4.285 | -3.408 | -2.737 | -4.642 | -4.407 | -3.723 | -3.835 | -4.981 | 192897 | ITGB4        | NM_133663_11_+_1 |
| Lad1          | -0.921 | -0.724 | 4.572  | 5.470  | 4.914  | 4.464  | 2.340  | 2.420  | -4.981 | -0.346 | 16763  | LAD1         | NM_133664_1_+_1  |
| Mef2d         | 3.807  | 3.909  | 3.774  | 3.664  | 3.881  | 3.599  | 3.801  | 3.942  | 5.137  | 4.744  | 17261  | MEF2D        | NM_133665_3_+_1  |
| Ndufv1        | 6.891  | 6.896  | 6.179  | 6.205  | 6.245  | 6.380  | 6.322  | 6.565  | 6.410  | 6.288  | 17995  | NDUFV1       | NM_133666_19_-_1 |
| Pdk2          | 3.518  | 3.896  | 2.756  | 2.804  | 2.823  | 3.026  | 3.153  | 3.327  | 4.221  | 4.212  | 18604  | PDK2         | NM_133667_11_-_1 |
| Slc25a3       | 8.326  | 8.374  | 8.170  | 8.189  | 8.174  | 8.131  | 7.965  | 7.968  | 7.696  | 7.828  | 18674  | SLC25A3      | NM_133668_10_-_1 |
| Rp2           | 6.060  | 6.404  | 7.310  | 7.358  | 7.184  | 7.348  | 7.122  | 7.052  | 6.766  | 7.735  | 19889  | RP2          | NM_133669_X_+_1  |
| Sult1a1       | 1.230  | -1.756 | 6.740  | 6.793  | 1.984  | 2.471  | 4.603  | 5.076  | 3.271  | 3.596  | 20887  | NA           | NM_133670_7_-_1  |
| U2af2         | 4.419  | 4.365  | 4.720  | 5.082  | 5.384  | 5.371  | 4.964  | 4.764  | 4.780  | 4.923  | 22185  | U2AF2        | NM_133671_7_+_1  |
| Vps26a        | 6.531  | 6.741  | 6.991  | 7.087  | 6.337  | 6.170  | 6.743  | 6.910  | 7.396  | 7.846  | 30930  | VPS26A       | NM_133672_10_-_1 |
| Tor1b         | 4.927  | 5.383  | 5.821  | 5.978  | 4.881  | 5.166  | 4.956  | 5.122  | 5.651  | 5.589  | 30934  | TOR1B        | NM_133673_2_+_1  |
| Arhgef5       | 1.628  | -0.068 | -2.010 | -1.540 | -2.105 | -2.732 | -3.540 | -1.637 | -4.981 | -1.761 | 54324  | ARHGEF5      | NM_133674_6_+_1  |
| Osgep         | 7.309  | 7.365  | 6.556  | 6.774  | 6.976  | 6.860  | 6.968  | 6.668  | 6.476  | 5.835  | 66246  | OSGEP        | NM_133676_14_-_1 |
| Sac3d1        | 4.441  | 4.516  | 4.048  | 4.152  | 4.316  | 4.470  | 4.108  | 4.230  | 3.547  | 3.321  | 66406  | SAC3D1       | NM_133678_19_-_1 |
| Cryzl1        | 4.994  | 4.558  | 4.677  | 4.826  | 4.963  | 5.104  | 4.975  | 5.064  | 5.279  | 5.232  | 66609  | CRYZL1       | NM_133679_16_-_1 |
| Mfsd14b       | 4.939  | 5.126  | 5.450  | 5.697  | 5.829  | 6.276  | 6.131  | 6.346  | 8.172  | 8.097  | 66631  | MFSD14B      | NM_133680_13_-_1 |
| Tspan1        | -4.981 | -2.681 | -4.831 | -4.962 | -4.400 | -4.780 | -2.728 | -5.016 | -4.981 | -4.227 | 66805  | TSPAN1       | NM_133681_4_-_1  |
| Tmem19        | 5.077  | 5.136  | 5.242  | 5.450  | 5.885  | 5.161  | 5.184  | 4.850  | 5.088  | 5.355  | 67226  | TMEM19       | NM_133683_10_-_1 |
| Marc2         | 7.601  | 7.516  | 6.378  | 6.455  | 6.803  | 6.722  | 6.732  | 6.731  | 6.542  | 6.242  | 67247  | MARC2        | NM_133684_1_-_1  |
| Rab31         | 1.155  | 0.800  | 5.274  | 5.629  | 4.833  | 4.675  | 6.098  | 6.445  | 8.600  | 8.717  | 106572 | RAB31        | NM_133685_17_-_1 |
| Qprt          | -0.348 | 0.061  | -1.657 | -2.367 | -1.126 | 0.842  | 0.086  | 0.412  | 1.024  | -0.065 | 67375  | QPRT         | NM_133686_7_-_1  |
| Cxzc5         | 7.152  | 7.314  | 2.596  | 2.931  | 2.710  | 2.858  | 2.044  | 3.139  | 0.442  | 1.186  | 67393  | CXXC5        | NM_133687_18_+_1 |
| Lymr5         | 5.689  | 5.681  | 4.234  | 4.249  | 4.194  | 3.944  | 4.195  | 4.111  | 4.100  | 3.967  | 67636  | ETFRF1       | NM_133688_6_+_1  |
| Ppp1r32       | -3.090 | -1.163 | -2.718 | -3.451 | -3.266 | -2.932 | -2.223 | -4.959 | -1.285 | -3.098 | 67752  | PPP1R32      | NM_133689_19_-_1 |
| Atp1b4        | -4.981 | -4.981 | -4.467 | -4.625 | -4.963 | -4.625 | -4.608 | -4.217 | -3.224 | -3.008 | 67821  | ATP1B4       | NM_133690_X_+_1  |
| Puf60         | 6.573  | 6.866  | 6.356  | 6.781  | 6.490  | 6.875  | 6.664  | 6.970  | 6.725  | 6.915  | 67959  | PUF60        | NM_133691_15_-_1 |
| Pold3         | 5.015  | 5.168  | 5.052  | 4.968  | 5.326  | 5.222  | 5.435  | 5.247  | 5.134  | 5.049  | 67967  | POLD3        | NM_133692_7_-_1  |
| Rbm42         | 6.972  | 6.789  | 6.744  | 6.567  | 7.092  | 6.785  | 7.052  | 6.682  | 7.185  | 6.644  | 68035  | RBM42        | NM_133693_7_-_1  |
| Fbxl15        | 3.581  | 3.281  | 2.250  | 2.318  | 2.454  | 2.345  | 2.736  | 2.649  | 2.777  | 2.935  | 68431  | FBXL15       | NM_133694_19_+_1 |
| Smim14        | 9.835  | 9.865  | 8.033  | 7.877  | 7.944  | 8.059  | 7.632  | 7.525  | 7.277  | 7.008  | 68552  | SMIM14       | NM_133697_5_-_1  |
| Btbd10        | 4.168  | 4.524  | 4.591  | 4.299  | 4.539  | 4.519  | 4.396  | 4.117  | 4.523  | 4.581  | 68815  | BTBD10       | NM_133700_7_-_1  |
| Prpf6         | 5.036  | 4.912  | 5.216  | 5.111  | 5.519  | 5.607  | 5.272  | 5.468  | 5.640  | 5.548  | 68879  | PRPF6        | NM_133701_2_+_1  |
| Nol11         | 4.901  | 5.005  | 4.935  | 4.807  | 4.841  | 4.771  | 4.909  | 4.839  | 4.665  | 4.628  | 68979  | NOL11        | NM_133702_11_-_1 |
| Fam220a       | 2.691  | 3.560  | 1.975  | 1.973  | 2.015  | 2.310  | 1.461  | 2.119  | 1.628  | 2.258  | 67238  | FAM220A      | NM_133703_5_+_1  |
| Sec22a        | 4.841  | 5.052  | 4.544  | 4.909  | 4.583  | 4.996  | 3.792  | 4.190  | 3.268  | 3.816  | 317717 | SEC22A       | NM_133704_16_-_1 |
| Pycr2         | 6.474  | 6.446  | 5.509  | 5.798  | 5.533  | 5.367  | 5.083  | 5.661  | 5.415  | 5.258  | 69051  | PYCR2        | NM_133705_1_+_1  |
| Tmem97        | 4.836  | 4.874  | 3.213  | 3.433  | 3.632  | 3.494  | 3.765  | 4.116  | 3.739  | 3.557  | 69071  | TMEM97       | NM_133706_11_-_1 |
| Kdf1          | -4.981 | -4.981 | -4.755 | -1.286 | -4.300 | -2.931 | -4.960 | -4.363 | -4.981 | -4.981 | 69073  | KDF1         | NM_133707_4_+_1  |
| Gmppa         | 6.202  | 6.370  | 5.619  | 5.792  | 5.270  | 5.543  | 5.168  | 5.582  | 5.749  | 5.597  | 69080  | GMPPA        | NM_133708_1_+_1  |
| Ctdspl        | -4.981 | -1.680 | -0.307 | -2.098 | -0.877 | -2.626 | -0.323 | 0.183  | 4.201  | 3.869  | 69274  | CTDSPL       | NM_133710_9_+_1  |
| Kansl2        | 5.017  | 4.989  | 4.796  | 5.031  | 5.651  | 5.694  | 5.340  | 5.385  | 6.074  | 5.628  | 69612  | KANSL2       | NM_133714_15_-_1 |
| Arhgap27      | 3.928  | 4.141  | 4.578  | 4.290  | 6.080  | 5.471  | 5.751  | 5.197  | 5.953  | 5.708  | 544817 | ARHGAP27     | NM_133715_11_-_1 |
| Smap2         | 5.934  | 5.743  | 5.627  | 5.887  | 6.344  | 6.576  | 6.226  | 6.001  | 6.243  | 6.093  | 69780  | SMAP2        | NM_133716_4_-_1  |
| Rab43         | -2.232 | -1.348 | 2.026  | 1.457  | 0.264  | 0.257  | -0.584 | 0.802  | -0.722 | -1.112 | 69834  | RAB43        | NM_133717_6_-_1  |
| Tmem30a       | 6.781  | 7.053  | 7.294  | 7.300  | 6.594  | 6.728  | 6.763  | 7.104  | 7.069  | 7.778  | 69981  | TMEM30A      | NM_133718_9_-_1  |
| Metrn         | 3.454  | 3.153  | 2.575  | 2.711  | 2.764  | 2.429  | 2.675  | 2.905  | 3.017  | 2.385  | 70083  | METRN        | NM_133719_17_-_1 |
| Cysltr2       | -4.517 | -4.662 | -2.848 | -4.751 | -3.341 | -4.931 | -4.224 | -4.016 | -4.217 | -4.981 | 70086  | CYSLTR2      | NM_133720_14_-_1 |
| Itga9         | -0.305 | -4.981 | -0.415 | -0.079 | 1.314  | 0.279  | 1.709  | 3.497  | -0.362 | 0.191  | 104099 | ITGA9        | NM_133721_9_+_1  |
| Abhd17c       | 4.458  | 4.397  | 4.674  | 4.533  | 5.287  | 5.129  | 4.945  | 5.029  | 5.153  | 5.329  | 70178  | ABHD17C      | NM_133722_7_-_1  |
| Asph          | 0.023  | -0.580 | -4.555 | -4.510 | -4.975 | -4.915 | -4.096 | -4.528 | -3.687 | -4.166 | 65973  | ASPH         | NM_133723_4_-_1  |
| Bloc1s4       | 5.954  | 5.848  | 5.029  | 5.080  | 5.256  | 5.492  | 5.095  | 4.982  | 4.581  | 4.438  | 117197 | BLOC1S4      | NM_133724_5_-_1  |
| St13          | 5.490  | 5.448  | 6.119  | 6.361  | 5.540  | 5.695  | 5.754  | 5.961  | 5.279  | 5.405  | 70356  | ST13         | NM_133726_15_-_1 |
| Kptn          | 5.513  | 5.148  | 4.268  | 4.530  | 5.478  | 5.516  | 4.617  | 4.329  | 4.148  | 3.815  | 70394  | KPTN         | NM_133727_7_+_1  |
| Asnsd1        | 5.150  | 5.520  | 6.140  | 6.210  | 6.024  | 6.248  | 5.772  | 6.079  | 5.711  | 6.079  | 70396  | ASNSD1       | NM_133728_1_-_1  |
| Stk26         | 4.016  | 4.297  | -0.325 | 0.162  | 0.919  | 0.752  | 2.296  | 2.397  | 3.758  | 3.791  | 70415  | STK26        | NM_133729_X_+_1  |
| Prss22        | -0.096 | -2.997 | -3.988 | -2.522 | -3.305 | -1.600 | -3.307 | -2.203 | -4.981 | -4.316 | 70835  | PRSS22       | NM_133731_17_-_1 |
| 4931406C07Rik | 1.604  | 1.255  | -3.686 | -0.354 | -1.586 | -4.873 | -0.739 | -0.886 | -4.177 | -4.654 | 70984  | C11orf54     | NM_133732_9_-_1  |
| Clmp          | 1.414  | 3.034  | 0.852  | 0.189  | 2.772  | 1.229  | 2.465  | 0.229  | 0.031  | -0.685 | 71566  | CLMP         | NM_133733_9_+_1  |
| Dcaf11        | 5.524  | 4.812  | 5.322  | 4.305  | 4.796  | 4.068  | 5.256  | 4.545  | 5.778  | 5.165  | 28199  | DCAF11       | NM_133734_14_+_1 |
| Ptcd1         | 4.064  | 4.192  | 3.866  | 3.857  | 4.173  | 3.914  | 4.197  | 4.093  | 4.718  | 4.306  | 71799  | ATP5J2-PTCD1 | NM_133735_5_-_1  |
| Lancl2        | 2.604  | 2.271  | 4.077  | 3.948  | 3.782  | 3.538  | 3.646  | 3.517  | 3.684  | 3.968  | 71835  | LANCL2       | NM_133737_6_+_1  |
| Antxr2        | 5.102  | 5.482  | 5.254  | 5.256  | 5.425  | 5.503  | 5.226  | 5.189  | 5.807  | 5.769  | 71914  | ANTXR2       | NM_133738_5_-_1  |
| Tmem123       | 8.444  | 8.633  | 8.949  | 9.380  | 9.497  | 9.483  | 9.099  | 8.894  | 7.497  | 7.826  | 71929  | TMEM123      | NM_133739_9_+_1  |
| Prmt3         | 4.589  | 4.612  | 4.976  | 5.079  | 4.586  | 4.784  | 4.366  | 4.918  | 5.303  | 4.996  | 71974  | PRMT3        | NM_133740_7_+_1  |
| Snrk          | 3.631  | 4.431  | 4.078  | 4.345  | 4.239  | 4.193  | 4.073  | 3.831  | 5.683  | 5.647  | 20623  | SNRK         | NM_133741_9_+_1  |
| Lypd3         | -4.981 | -2.997 | -4.981 | -4.981 | -4.914 | -4.309 | -4.981 | -4.981 | -4.981 | -3.498 | 72434  | LYPD3        | NM_133743_7_+_1  |
| Ccdc71        | 4.770  | 4.561  | 5.029  | 4.908  | 4.807  | 4.777  | 4.834  | 4.991  | 5.126  | 4.994  | 72454  | NA           | NM_133744_9_+_1  |
| Calhm2        | 5.839  | 5.942  | 5.271  | 5.003  | 6.059  | 6.315  | 6.038  | 5.960  | 6.665  | 6.645  | 72691  | CALHM2       | NM_133746_19_-_1 |
| Fam98a        | 4.264  | 4.297  | 3.885  | 4.009  | 4.190  | 4.166  | 3.759  | 4.045  | 3.400  | 3.690  | 72722  | FAM98A       | NM_133747_17_-_1 |
| Insig2        | 3.149  | 3.176  | 3.667  | 3.191  | 2.363  | 2.431  | 1.718  | 2.064  | 1.439  | 2.583  | 72999  | INSIG2       | NM_133748_1_-_1  |
| Emc7          | 7.104  | 7.187  | 6.279  | 6.243  | 6.052  | 6.099  | 6.145  | 6.206  | 5.962  | 6.077  | 73024  | EMC7         | NM_133749_2_+_1  |
| Fam118a       | 2.268  | 3.385  | 4.302  | 4.455  | 2.871  | 3.226  | 2.898  | 3.344  | 3.260  | 3.901  | 73225  | FAM118A      | NM_133750_15_+_1 |
| Opa1          | 4.306  | 4.116  | 4.756  | 4.727  | 4.459  | 4.650  | 4.626  | 4.552  | 4.779  | 5.150  | 74143  | OPA1         | NM_133752_16_+_1 |
| Errfi1        | 1.016  | 4.260  | 4.624  | 5.532  | 4.959  | 5.513  | 4.693  | 4.318  | 3.310  | 3.496  | 74155  | ERRFI1       | NM_133753_4_+_1  |

|               |        |        |        |        |        |        |        |        |        |        |        |          |                 |
|---------------|--------|--------|--------|--------|--------|--------|--------|--------|--------|--------|--------|----------|-----------------|
| Fblim1        | -3.593 | -3.919 | -4.192 | -4.263 | -4.325 | -4.800 | -2.579 | -4.518 | -2.199 | -2.969 | 74202  | FBLIM1   | NM_133754_4_-1  |
| Tube2p2       | 2.974  | 3.468  | 3.189  | 3.514  | 3.761  | 3.356  | 2.247  | 3.333  | 3.136  | 2.257  | 74237  | TUBGCP2  | NM_133755_7_-1  |
| Gpn1          | 5.249  | 5.438  | 5.749  | 5.879  | 5.894  | 5.928  | 5.631  | 5.496  | 4.446  | 4.645  | 74254  | GNP1     | NM_133756_5_+1  |
| Pgs1          | 5.654  | 5.519  | 6.013  | 6.222  | 5.732  | 5.813  | 5.778  | 5.729  | 6.534  | 6.350  | 74451  | PGS1     | NM_133757_11_+1 |
| Usp47         | 5.364  | 5.523  | 6.433  | 6.293  | 6.277  | 6.069  | 6.395  | 6.273  | 6.996  | 7.008  | 74996  | USP47    | NM_133758_7_+1  |
| Zbtb3         | 0.768  | 0.363  | 0.561  | 0.332  | -0.471 | 0.474  | 0.984  | -0.058 | 0.718  | 0.691  | 75291  | ZBTB3    | NM_133759_19_+1 |
| Sirt4         | 3.222  | 2.979  | 2.100  | 2.369  | 2.622  | 2.778  | 2.142  | 2.173  | 1.466  | 2.231  | 75387  | SIRT4    | NM_133760_5_-1  |
| Dcp1a         | 4.012  | 3.990  | 4.223  | 4.151  | 4.643  | 4.542  | 4.809  | 4.371  | 5.167  | 5.177  | 75901  | DCP1A    | NM_133761_14_+1 |
| Ncapg2        | 2.958  | 2.935  | 4.325  | 3.880  | 3.536  | 3.299  | 3.225  | 3.482  | 2.535  | 2.691  | 76044  | NCAPG2   | NM_133762_12_+1 |
| Dnttip1       | 5.961  | 5.957  | 5.677  | 5.782  | 5.687  | 5.645  | 5.394  | 5.350  | 5.286  | 5.084  | 76233  | DNTTIP1  | NM_133763_2_+1  |
| Atp6v0e2      | -4.981 | 3.061  | -4.882 | 4.213  | -3.773 | 2.958  | -2.201 | 2.897  | -4.981 | 3.041  | 76252  | ATP6V0E2 | NM_133764_6_+1  |
| Fbxo31        | 3.446  | 3.493  | 3.445  | 3.424  | 3.765  | 3.762  | 3.895  | 3.581  | 4.503  | 4.214  | 76454  | FBXO31   | NM_133765_8_-1  |
| Efr3a         | 6.506  | 6.476  | 7.968  | 7.758  | 6.972  | 7.153  | 7.220  | 7.284  | 6.897  | 7.107  | 76740  | EFR3A    | NM_133766_15_+1 |
| Mtif2         | 4.685  | 3.881  | 4.478  | 3.556  | 4.400  | 3.564  | 4.457  | 3.636  | 3.930  | 3.437  | 76784  | MTIF2    | NM_133767_11_+1 |
| Asl           | 5.197  | 5.258  | 6.016  | 6.012  | 4.889  | 4.922  | 5.018  | 5.040  | 5.415  | 5.306  | 109900 | ASL      | NM_133768_5_-1  |
| Cyfp2         | 6.451  | 6.309  | 7.282  | 7.068  | 6.678  | 6.529  | 6.443  | 6.234  | 7.003  | 6.223  | 76884  | CYFP2    | NM_133769_11_-1 |
| Coq8b         | 3.822  | 4.014  | 3.604  | 3.742  | 3.634  | 3.912  | 3.990  | 4.260  | 4.829  | 4.673  | 76889  | COQ8B    | NM_133770_7_+1  |
| Memo1         | 5.031  | 4.940  | 4.446  | 4.789  | 4.173  | 4.352  | 4.004  | 4.575  | 3.133  | 3.679  | 76890  | MEMO1    | NM_133771_17_-1 |
| Ssbp4         | 5.175  | 4.948  | 4.942  | 5.349  | 5.163  | 5.511  | 5.408  | 5.938  | 6.584  | 6.601  | 76900  | SSBP4    | NM_133772_8_-1  |
| Stard4        | 3.836  | 4.483  | 3.686  | 3.436  | 2.393  | 2.868  | 3.341  | 3.606  | 3.259  | 3.706  | 170459 | STARD4   | NM_133774_18_-1 |
| Il33          | -4.981 | -4.981 | -3.665 | -4.976 | -4.980 | -4.969 | -4.938 | -3.535 | -4.981 | -4.981 | 77125  | IL33     | NM_133775_19_+1 |
| Ube2s         | 5.940  | 4.847  | 5.847  | 5.415  | 6.034  | 5.267  | 5.639  | 4.921  | 5.048  | 4.411  | 77891  | UBE2S    | NM_133777_7_-1  |
| Fam131a       | -0.448 | 0.226  | 3.350  | 3.681  | 2.998  | 3.085  | 2.855  | 1.905  | 2.253  | 2.222  | 78408  | FAM131A  | NM_133778_16_+1 |
| Pigt          | 5.605  | 6.074  | 5.152  | 5.623  | 4.921  | 5.748  | 4.955  | 5.548  | 4.878  | 5.039  | 78928  | PIGT     | NM_133779_2_+1  |
| Tpr           | 7.157  | 7.233  | 7.714  | 7.544  | 7.926  | 7.958  | 7.816  | 7.709  | 7.495  | 7.600  | 108989 | TPR      | NM_133780_1_+1  |
| Cab39         | 5.515  | 5.697  | 6.282  | 6.224  | 6.406  | 6.658  | 6.498  | 6.606  | 7.117  | 7.545  | 12283  | CAB39    | NM_133781_1_+1  |
| PTges2        | 4.517  | 4.466  | 3.712  | 3.657  | 3.840  | 3.793  | 3.911  | 3.912  | 4.278  | 3.940  | 96979  | PTGES2   | NM_133783_2_+1  |
| Wwtr1         | -4.981 | -4.981 | -4.800 | -4.518 | -4.887 | -4.833 | -4.437 | -3.204 | -4.699 | -1.756 | 97064  | WWTR1    | NM_133784_3_-1  |
| Smc4          | 6.022  | 6.182  | 6.802  | 6.489  | 7.290  | 6.882  | 6.768  | 6.316  | 5.165  | 5.310  | 70099  | SMC4     | NM_133786_3_+1  |
| Nmd3          | 6.695  | 6.619  | 5.545  | 5.737  | 5.907  | 5.713  | 5.483  | 5.569  | 4.885  | 4.573  | 97112  | NMD3     | NM_133787_3_+1  |
| Icmt          | 3.051  | 3.455  | 2.934  | 1.924  | 3.688  | 3.039  | 3.961  | 3.191  | 4.307  | 4.476  | 57295  | ICMT     | NM_133788_4_+1  |
| Strn4         | 1.623  | 1.488  | 3.359  | 3.499  | 2.538  | 2.107  | 2.841  | 2.920  | 2.790  | 3.213  | 97387  | STRN4    | NM_133789_7_+1  |
| Wwc2          | 2.107  | 1.756  | -0.076 | 0.118  | 0.512  | 1.009  | 2.012  | 2.055  | 3.300  | 3.022  | 52357  | WWC2     | NM_133791_8_-1  |
| Pla2g15       | 4.174  | 4.203  | 2.795  | 3.594  | 3.118  | 3.257  | 4.425  | 5.643  | 6.106  | 6.511  | 192654 | PLA2G15  | NM_133792_8_+1  |
| Qars          | 4.739  | 4.568  | 5.492  | 5.564  | 4.946  | 4.757  | 4.908  | 4.928  | 5.783  | 5.496  | 97541  | NA       | NM_133794_9_+1  |
| Ttc1          | 6.170  | 6.027  | 5.468  | 5.707  | 5.487  | 5.459  | 5.501  | 5.546  | 4.880  | 5.070  | 66827  | TTC1     | NM_133795_11_-1 |
| Arhgdia       | 8.462  | 8.501  | 9.242  | 9.414  | 9.323  | 9.231  | 9.018  | 9.012  | 9.111  | 9.030  | 192662 | ARHGDIA  | NM_133796_11_-1 |
| 4833439L19Rik | 5.307  | 4.808  | 5.366  | 4.955  | 5.233  | 4.554  | 5.343  | 4.972  | 5.941  | 5.427  | 97820  | KIAA1191 | NM_133797_13_-1 |
| Exd2          | 3.233  | 3.602  | 3.632  | 3.773  | 3.666  | 3.944  | 3.424  | 3.956  | 4.340  | 4.388  | 97827  | EXD2     | NM_133798_12_+1 |
| Nol12         | 5.344  | 5.385  | 4.750  | 4.963  | 4.779  | 4.829  | 4.883  | 4.745  | 3.865  | 3.712  | 97961  | NOL12    | NM_133800_15_+1 |
| Gtf2f1        | 6.108  | 6.222  | 5.816  | 6.060  | 6.149  | 5.976  | 5.823  | 5.822  | 5.272  | 4.891  | 98053  | GTF2F1   | NM_133801_17_-1 |
| Dpp3          | 5.795  | 5.888  | 6.214  | 6.216  | 6.128  | 6.082  | 5.817  | 6.053  | 6.677  | 6.462  | 75221  | DPP3     | NM_133803_19_-1 |
| Tmem132a      | -1.692 | -0.771 | 1.302  | 2.107  | 2.526  | 3.059  | 1.632  | 1.662  | 1.272  | 1.800  | 98170  | TMEM132A | NM_133804_19_-1 |
| Cops8         | 6.259  | 6.179  | 5.815  | 6.033  | 5.938  | 5.977  | 5.804  | 5.804  | 5.753  | 5.645  | 108679 | COP8     | NM_133805_1_+1  |
| Uap1          | -4.565 | -3.512 | -2.356 | -4.929 | -3.150 | -3.274 | -2.419 | -3.084 | -4.196 | -4.878 | 107652 | UAP1     | NM_133806_1_-1  |
| Lrrc59        | 6.375  | 6.322  | 6.460  | 6.914  | 6.046  | 6.094  | 6.310  | 6.775  | 6.976  | 7.030  | 98238  | LRRCS9   | NM_133807_11_+1 |
| Hdlbp         | 4.354  | 4.389  | 5.534  | 5.559  | 3.548  | 4.028  | 4.014  | 4.800  | 4.122  | 5.481  | 110611 | HDLBP    | NM_133808_1_-1  |
| Kmo           | 9.389  | 9.605  | 7.908  | 7.121  | 7.786  | 7.537  | 7.426  | 6.802  | 4.120  | 4.055  | 98256  | KMO      | NM_133809_1_+1  |
| Stk17b        | 9.597  | 9.969  | 7.516  | 7.211  | 8.928  | 8.930  | 8.281  | 8.165  | 8.224  | 8.150  | 98267  | STK17B   | NM_133810_1_-1  |
| Lbr           | 6.936  | 7.240  | 6.208  | 6.178  | 7.082  | 6.853  | 7.085  | 7.128  | 8.597  | 8.289  | 98386  | LBR      | NM_133815_1_-1  |
| Sh3bp4        | 5.397  | 5.558  | 4.032  | 4.359  | 3.068  | 2.485  | 3.249  | 2.893  | 3.210  | 2.892  | 98402  | SH3BP4   | NM_133816_1_+1  |
| Zfp451        | 3.261  | 3.206  | 3.807  | 3.420  | 3.846  | 3.519  | 3.974  | 3.617  | 4.004  | 3.589  | 98403  | ZNF451   | NM_133817_1_-1  |
| Al597479      | 3.398  | 3.314  | 3.534  | 3.210  | 3.573  | 3.457  | 3.362  | 3.271  | 3.523  | 3.899  | 98404  | C2orf49  | NM_133818_1_+1  |
| Ppp1r15b      | 4.937  | 4.572  | 6.392  | 6.197  | 5.367  | 5.493  | 5.977  | 6.157  | 7.953  | 7.646  | 108954 | PPP1R15B | NM_133819_1_+1  |
| Phlpp1        | 1.820  | 1.713  | 3.930  | 3.423  | 3.972  | 3.717  | 3.824  | 3.503  | 2.422  | 2.745  | 98432  | PHLPP1   | NM_133821_1_+1  |
| Mmaa          | 3.875  | 4.364  | 3.230  | 3.571  | 3.359  | 3.883  | 3.305  | 3.547  | 2.179  | 3.351  | 109136 | MMAA     | NM_133823_8_-1  |
| D1Ert622e     | 5.860  | 6.062  | 6.376  | 6.142  | 6.268  | 5.676  | 6.502  | 6.601  | 7.584  | 7.806  | 52392  | CSorf30  | NM_133825_1_-1  |
| Atp6v1h       | 7.050  | 7.123  | 6.910  | 6.933  | 6.660  | 6.608  | 6.529  | 6.579  | 6.527  | 6.482  | 108664 | ATP6V1H  | NM_133826_1_+1  |
| Creb1         | 5.140  | 5.255  | 5.652  | 5.566  | 5.751  | 5.443  | 5.596  | 5.511  | 5.583  | 6.205  | 12912  | CREB1    | NM_133828_1_+1  |
| Mfsd6         | 2.607  | 2.589  | 4.548  | 4.761  | 4.482  | 5.041  | 4.391  | 4.082  | 5.920  | 6.257  | 98682  | MFS6     | NM_133829_1_-1  |
| Gltsr2        | 7.734  | 7.355  | 7.528  | 7.411  | 7.690  | 7.366  | 7.779  | 7.601  | 8.009  | 7.640  | 68077  | GLTSCR2  | NM_133831_7_-1  |
| Rdh10         | 2.555  | 2.787  | 2.130  | 2.317  | 2.414  | 2.327  | 2.790  | 2.972  | 3.227  | 3.397  | 98711  | RDH10    | NM_133832_1_+1  |
| Dst           | 4.536  | 4.420  | 0.553  | 1.235  | 2.571  | 3.116  | 2.461  | 2.363  | -1.240 | -0.418 | 13518  | NA       | NM_133833_1_+1  |
| Hnnpf         | 8.398  | 8.643  | 8.411  | 8.442  | 8.415  | 8.153  | 8.252  | 8.095  | 8.370  | 8.270  | 98758  | HNNRPF   | NM_133834_6_+1  |
| Ubac1         | 5.148  | 5.288  | 5.621  | 5.907  | 5.328  | 5.877  | 4.966  | 5.606  | 4.545  | 4.497  | 98766  | UBAC1    | NM_133835_2_-1  |
| Il15ra        | 0.421  | 0.901  | 3.091  | 3.043  | 1.609  | 1.915  | 2.193  | 1.476  | 2.895  | 2.674  | 16169  | IL15RA   | NM_133836_2_+1  |
| Cdc123        | 7.170  | 6.967  | 6.150  | 6.150  | 6.340  | 6.066  | 6.245  | 5.967  | 5.331  | 5.403  | 98828  | CDC123   | NM_133837_2_-1  |
| Ehd4          | 5.923  | 6.119  | 5.554  | 6.107  | 5.604  | 6.173  | 7.032  | 7.273  | 8.087  | 7.950  | 98878  | EHD4     | NM_133838_2_-1  |
| Mmadhc        | 6.979  | 6.980  | 6.076  | 6.207  | 6.215  | 6.256  | 5.946  | 5.938  | 5.631  | 5.710  | 109129 | MMADHC   | NM_133839_2_-1  |
| Clp1          | 4.976  | 4.904  | 4.602  | 4.535  | 4.627  | 4.647  | 4.729  | 4.472  | 4.897  | 4.761  | 98985  | CLP1     | NM_133840_2_-1  |
| Tm9sf4        | 4.583  | 4.883  | 5.414  | 5.205  | 5.081  | 4.775  | 5.547  | 5.349  | 6.944  | 6.114  | 99237  | TM9SF4   | NM_133847_2_+1  |
| Comm7         | 7.338  | 7.462  | 6.918  | 7.039  | 6.730  | 6.972  | 6.683  | 6.715  | 6.403  | 6.699  | 99311  | COMMD7   | NM_133850_2_-1  |
| Nusap1        | 0.095  | 0.192  | 3.606  | 3.804  | 4.556  | 4.221  | 4.186  | 3.457  | 2.134  | 2.018  | 108907 | NUSAP1   | NM_133851_2_+1  |
| Golga2        | 3.320  | 2.917  | 0.904  | 2.664  | 2.036  | 2.613  | 2.182  | 3.047  | 3.721  | 3.873  | 99412  | GOLGA2   | NM_133852_2_+1  |

|          |        |        |        |        |        |        |        |        |        |        |        |            |                 |
|----------|--------|--------|--------|--------|--------|--------|--------|--------|--------|--------|--------|------------|-----------------|
| Magi3    | -2.160 | -0.757 | -3.158 | -3.838 | -3.121 | -3.104 | -3.430 | -3.950 | -4.098 | -4.610 | 99470  | MAGI3      | NM_133853_3_-1  |
| SnapiN   | 7.043  | 6.569  | 6.078  | 5.938  | 6.150  | 5.932  | 6.226  | 6.050  | 6.357  | 5.886  | 20615  | SNAPIN     | NM_133854_3_-1  |
| Usp53    | 2.031  | 2.063  | 2.871  | 2.853  | 2.012  | 1.841  | 1.761  | 2.252  | 2.208  | 2.319  | 99526  | USP53      | NM_133857_3_-1  |
| Fam63a   | 0.165  | 0.637  | 0.668  | -0.983 | -0.820 | -0.184 | 0.626  | 0.168  | 2.964  | 2.981  | 75007  | FAM63A     | NM_133858_3_+1  |
| Olfml3   | 0.743  | -1.379 | -3.409 | -3.504 | -2.025 | -2.104 | -3.266 | -2.494 | -4.981 | -2.452 | 99543  | OLFML3     | NM_133859_3_-1  |
| Dclre1b  | 3.939  | 3.545  | 3.597  | 3.344  | 4.057  | 3.981  | 4.627  | 4.222  | 5.629  | 5.366  | 140917 | DCLRE1B    | NM_133865_3_-1  |
| Cept1    | 5.938  | 6.326  | 6.163  | 6.304  | 6.136  | 6.403  | 6.474  | 6.868  | 6.904  | 7.436  | 99712  | CEPT1      | NM_133869_3_-1  |
| Ifi44    | 5.603  | 5.465  | 3.404  | 1.457  | 1.291  | -2.127 | 2.208  | 0.405  | 2.009  | 0.917  | 99899  | IFI44      | NM_133871_3_-1  |
| Kdm1a    | 5.183  | 5.316  | 5.739  | 5.897  | 5.600  | 5.526  | 5.454  | 5.550  | 5.902  | 6.015  | 99982  | KDM1A      | NM_133872_4_-1  |
| Rcc1     | 2.534  | 2.051  | 4.088  | 4.513  | 4.374  | 4.021  | 4.170  | 4.202  | 3.825  | 3.960  | 100088 | RCC1       | NM_133878_4_-1  |
| Zbtb48   | 3.103  | 3.373  | 3.329  | 3.064  | 3.252  | 3.225  | 2.987  | 2.858  | 3.168  | 2.949  | 100090 | ZBTB48     | NM_133879_4_-1  |
| Pafah2   | 1.397  | -0.244 | -4.547 | -4.767 | -4.354 | -1.788 | -4.222 | -4.063 | -2.922 | -3.572 | 100163 | PAFAH2     | NM_133880_4_+1  |
| Adprhl2  | 5.201  | 5.155  | 4.718  | 4.842  | 4.867  | 4.907  | 4.572  | 4.661  | 4.421  | 4.294  | 100206 | ADPRHL2    | NM_133883_4_-1  |
| Gpn2     | 4.214  | 4.012  | 3.907  | 3.810  | 3.948  | 3.435  | 3.557  | 3.224  | 3.608  | 3.068  | 100210 | GNP2       | NM_133884_4_+1  |
| Osbp19   | 4.368  | 5.040  | 4.519  | 4.832  | 4.287  | 4.437  | 4.634  | 5.128  | 6.108  | 6.144  | 100273 | OSBPL9     | NM_133885_4_-1  |
| AU040320 | 5.331  | 5.479  | 4.567  | 4.791  | 4.336  | 4.628  | 4.335  | 4.616  | 4.994  | 5.133  | 100317 | KIAA0319L  | NM_133886_4_+1  |
| Stx12    | 5.071  | 5.370  | 5.620  | 5.444  | 4.959  | 4.927  | 5.097  | 5.107  | 5.433  | 5.548  | 100226 | STX12      | NM_133887_4_-1  |
| Smpdl3b  | -1.549 | -4.981 | 1.886  | 3.197  | 0.281  | 0.441  | 5.188  | 4.811  | 6.308  | 5.571  | 100340 | SMPDL3B    | NM_133888_4_-1  |
| Bsdc1    | 4.378  | 4.363  | 5.013  | 5.140  | 5.187  | 5.286  | 4.736  | 4.656  | 5.157  | 5.086  | 100383 | BSDC1      | NM_133889_4_+1  |
| Slc44a1  | 3.918  | 4.405  | 3.050  | 3.398  | 4.273  | 4.067  | 2.977  | 2.866  | 3.026  | 3.210  | 100434 | SLC44A1    | NM_133891_4_+1  |
| Slc15a4  | 6.620  | 7.481  | 5.390  | 5.496  | 7.056  | 7.402  | 7.019  | 7.180  | 7.122  | 7.562  | 100561 | SLC15A4    | NM_133895_5_-1  |
| Lrrc8c   | 4.393  | 4.422  | 6.069  | 6.087  | 5.720  | 5.775  | 5.920  | 6.083  | 6.570  | 6.385  | 100604 | LRRC8C     | NM_133897_5_+1  |
| N4bp2l1  | 6.470  | 6.437  | 7.826  | 7.694  | 7.633  | 7.489  | 7.081  | 6.798  | 7.202  | 7.068  | 100637 | N4BP2L1    | NM_133898_5_-1  |
| PspH     | 5.415  | 5.293  | 4.317  | 4.712  | 4.206  | 4.405  | 4.093  | 4.362  | 3.161  | 3.313  | 100678 | PSPH       | NM_133900_5_-1  |
| Sdsl     | -3.843 | -2.681 | -2.145 | 0.145  | -1.916 | -0.044 | -4.281 | 0.838  | -2.780 | -2.396 | 257635 | SDSL       | NM_133902_5_-1  |
| Spon2    | -4.981 | -4.981 | -4.114 | -1.568 | -4.831 | -3.147 | -3.493 | -1.918 | -2.356 | -4.981 | 100689 | SPON2      | NM_133903_5_-1  |
| Papd4    | 5.750  | 5.589  | 7.302  | 7.124  | 6.412  | 6.457  | 6.579  | 6.499  | 6.499  | 6.448  | 100715 | PAPD4      | NM_133905_13_-1 |
| Zkscan1  | 3.369  | 3.515  | 3.899  | 4.028  | 3.884  | 4.014  | 3.662  | 3.710  | 4.274  | 4.039  | 74570  | ZKSCAN1    | NM_133906_5_+1  |
| Ube3c    | 3.817  | 3.781  | 4.433  | 4.736  | 4.685  | 4.682  | 4.382  | 4.469  | 4.851  | 5.232  | 100763 | UBE3C      | NM_133907_5_+1  |
| Rita1    | -4.851 | -0.541 | -1.546 | -1.784 | -2.099 | -0.827 | -1.233 | -1.170 | -1.716 | -0.302 | 100764 | RITA1      | NM_133908_5_-1  |
| Tbc1d14  | 3.343  | 4.370  | 5.424  | 5.730  | 4.659  | 4.830  | 4.514  | 4.822  | 6.076  | 6.041  | 100855 | TBC1D14    | NM_133910_5_-1  |
| Adgra3   | -2.784 | 0.970  | -1.248 | -1.122 | -1.931 | -0.841 | -1.029 | -2.267 | -0.766 | 0.110  | 70693  | ADGRA3     | NM_133911_5_-1  |
| Chpf2    | 4.201  | 4.370  | 4.609  | 4.776  | 4.182  | 4.498  | 4.369  | 4.481  | 5.659  | 5.535  | 100910 | CHPF2      | NM_133913_5_+1  |
| Rasa4    | 5.311  | 4.926  | 6.890  | 6.860  | 7.337  | 7.476  | 7.647  | 7.855  | 7.261  | 7.374  | 54153  | RASA4      | NM_133914_5_+1  |
| Pxn      | -0.791 | -0.266 | 2.697  | 2.350  | 2.868  | 2.849  | 1.542  | 2.250  | 3.841  | 4.164  | 19303  | PXN        | NM_133915_5_+1  |
| Eif3b    | 6.104  | 6.193  | 6.976  | 7.114  | 6.761  | 6.793  | 6.881  | 6.979  | 7.127  | 6.964  | 27979  | EIF3B      | NM_133916_5_+1  |
| Mlxip    | 5.083  | 5.277  | 5.481  | 5.243  | 5.138  | 5.413  | 5.403  | 5.360  | 5.708  | 5.584  | 208104 | MLXIP      | NM_133917_5_+1  |
| Emilin1  | 4.428  | 3.402  | -0.009 | 0.331  | -1.879 | -1.748 | 2.606  | 3.188  | 5.922  | 6.152  | 100952 | EMILIN1    | NM_133918_5_+1  |
| Aff1     | 5.599  | 5.084  | 6.243  | 6.099  | 5.213  | 5.213  | 4.961  | 5.331  | 5.218  | 4.904  | 17355  | AFF1       | NM_133919_5_+1  |
| Nfxl1    | 3.358  | 3.071  | 4.532  | 4.841  | 2.558  | 2.899  | 3.452  | 4.044  | 5.203  | 5.747  | 100978 | NFXL1      | NM_133921_5_-1  |
| Krba1    | 1.610  | 2.662  | 0.300  | 0.259  | 2.321  | 2.646  | 0.777  | 0.913  | -0.085 | -0.186 | 77827  | KRBA1      | NM_133922_6_+1  |
| Ttl13    | -0.207 | 0.532  | 1.101  | 1.057  | 1.258  | 0.414  | 0.700  | 0.731  | 2.391  | 1.555  | 101100 | TTL13      | NM_133923_6_+1  |
| Snx21    | 1.319  | 0.143  | 4.823  | 4.640  | 4.647  | 4.898  | 4.639  | 3.899  | 3.277  | 3.076  | 101113 | SNX21      | NM_133924_2_+1  |
| Rbm28    | 4.916  | 4.297  | 4.377  | 4.246  | 5.050  | 4.809  | 4.922  | 4.612  | 4.809  | 4.469  | 68272  | RBM28      | NM_133925_6_-1  |
| Camk1    | 2.275  | 5.311  | 3.368  | 5.616  | 3.213  | 5.453  | 4.800  | 6.669  | 5.804  | 7.607  | 52163  | CAMK1      | NM_133926_6_-1  |
| Irfg2    | 3.180  | 3.975  | 3.129  | 3.284  | 3.057  | 3.231  | 2.790  | 2.808  | 2.749  | 2.705  | 101142 | ITFG2      | NM_133927_6_-1  |
| Chchd4   | 5.017  | 5.035  | 4.880  | 5.166  | 4.774  | 4.810  | 4.715  | 4.672  | 4.454  | 4.191  | 72170  | CHCHD4     | NM_133928_6_-1  |
| Creld1   | 3.708  | 4.037  | 2.947  | 3.274  | 2.174  | 2.636  | 2.417  | 3.049  | 1.324  | 2.747  | 171508 | CRELD1     | NM_133930_6_+1  |
| Pot1a    | 4.670  | 4.936  | 4.201  | 4.210  | 5.071  | 5.037  | 4.811  | 4.887  | 4.650  | 4.872  | 101185 | POT1       | NM_133931_6_-1  |
| Tada3    | 3.574  | 4.000  | 3.863  | 4.056  | 4.308  | 4.118  | 4.070  | 3.647  | 4.091  | 3.574  | 101206 | TADA3      | NM_133932_6_-1  |
| Rpn1     | 7.192  | 7.126  | 7.829  | 8.177  | 6.395  | 6.704  | 7.024  | 7.982  | 7.698  | 7.918  | 103963 | RPN1       | NM_133933_6_+1  |
| Isy1     | 5.178  | 5.400  | 4.898  | 5.147  | 5.109  | 5.227  | 5.111  | 5.083  | 4.521  | 4.552  | 57905  | ISY1-RAB43 | NM_133934_6_-1  |
| Brk1     | 8.661  | 8.806  | 8.563  | 8.670  | 8.159  | 8.149  | 8.379  | 8.380  | 8.164  | 8.002  | 101314 | BRK1       | NM_133937_6_+1  |
| Lsm8     | 6.538  | 6.530  | 5.517  | 5.333  | 5.856  | 5.709  | 5.850  | 5.504  | 4.869  | 4.739  | 76522  | LSM8       | NM_133939_6_+1  |
| Fbxl14   | 3.453  | 3.307  | 3.979  | 3.855  | 3.468  | 3.827  | 3.648  | 3.871  | 5.330  | 5.312  | 101358 | FBXL14     | NM_133940_6_+1  |
| Dhx32    | 3.253  | 3.126  | 2.334  | 3.186  | 2.488  | 2.758  | 2.495  | 2.802  | 3.523  | 3.572  | 101437 | DHX32      | NM_133941_7_-1  |
| Plekha1  | 5.155  | 5.274  | 6.859  | 6.644  | 7.350  | 7.402  | 6.945  | 6.487  | 5.988  | 6.185  | 101476 | PLEKHA1    | NM_133942_7_+1  |
| Hsd3b7   | 5.063  | 5.506  | 6.724  | 6.936  | 3.717  | 4.197  | 4.920  | 5.742  | 5.671  | 6.022  | 101502 | HSD3B7     | NM_133943_7_+1  |
| Vrk3     | 6.330  | 6.491  | 6.049  | 6.243  | 6.025  | 6.122  | 5.769  | 5.885  | 5.586  | 5.637  | 101568 | VRK3       | NM_133945_7_+1  |
| Numa1    | 4.914  | 4.922  | 5.452  | 5.514  | 6.203  | 6.334  | 5.921  | 5.885  | 5.659  | 6.148  | 101706 | NUMA1      | NM_133947_7_+1  |
| Psip1    | 4.477  | 4.522  | 4.762  | 4.779  | 5.659  | 5.477  | 5.148  | 5.094  | 3.667  | 4.648  | 101739 | PSIP1      | NM_133948_4_-1  |
| Ptov1    | 4.610  | 4.749  | 4.679  | 4.773  | 4.111  | 3.952  | 4.198  | 4.291  | 4.156  | 4.477  | 84113  | PTOV1      | NM_133949_7_-1  |
| Kdelr1   | 6.058  | 6.079  | 5.326  | 5.123  | 4.670  | 4.601  | 4.994  | 5.272  | 5.229  | 5.584  | 68137  | KDELRL1    | NM_133950_7_+1  |
| Rrp8     | -0.981 | 1.117  | 1.226  | 0.798  | 1.910  | 1.849  | 1.067  | 1.265  | 2.743  | 2.335  | 101867 | RRP8       | NM_133951_7_-1  |
| Unc45a   | 4.204  | 4.288  | 3.975  | 4.178  | 3.977  | 4.172  | 3.721  | 3.983  | 4.388  | 4.673  | 101869 | UNC45A     | NM_133952_7_-1  |
| Sf3b3    | 5.390  | 5.712  | 6.587  | 6.810  | 6.774  | 6.707  | 6.672  | 6.700  | 6.927  | 6.917  | 101943 | SF3B3      | NM_133953_8_-1  |
| Usb1     | 5.997  | 5.756  | 4.964  | 5.012  | 5.378  | 5.160  | 5.276  | 5.239  | 6.021  | 5.763  | 101985 | USB1       | NM_133954_8_+1  |
| Rhou     | -4.981 | -4.981 | -4.586 | -4.846 | -4.966 | -4.254 | -2.808 | -1.833 | 4.093  | 4.255  | 69581  | RHO        | NM_133955_8_+1  |
| Nfat5    | 1.602  | 2.241  | 3.734  | 4.099  | 5.262  | 4.840  | 3.766  | 4.078  | 3.330  | 3.799  | 54446  | NFAT5      | NM_133957_8_+1  |
| Arhgef18 | 2.892  | 2.633  | 2.262  | 2.529  | 3.967  | 3.218  | 4.554  | 4.287  | 5.733  | 5.532  | 102098 | ARHGEF18   | NM_133962_8_+1  |
| Dohh     | 5.300  | 5.133  | 4.673  | 4.797  | 4.587  | 4.557  | 4.728  | 4.548  | 4.781  | 4.488  | 102115 | DOHH       | NM_133964_10_+1 |
| Taf5l    | 4.857  | 4.787  | 4.918  | 4.965  | 4.601  | 4.540  | 4.663  | 4.997  | 5.544  | 5.295  | 102162 | TAF5L      | NM_133966_8_-1  |
| Zdhc7    | 4.432  | 4.631  | 4.497  | 4.702  | 5.060  | 5.091  | 5.396  | 5.475  | 6.798  | 6.616  | 102193 | ZDHHC7     | NM_133967_8_-1  |
| Snappc2  | 5.071  | 4.898  | 4.504  | 4.559  | 4.495  | 4.460  | 4.365  | 4.236  | 4.159  | 3.885  | 102209 | SNAPC2     | NM_133968_8_+1  |

|               |        |        |        |        |        |        |        |        |        |        |        |           |                 |
|---------------|--------|--------|--------|--------|--------|--------|--------|--------|--------|--------|--------|-----------|-----------------|
| Cyp4v3        | 3.760  | 3.728  | 5.758  | 5.416  | 4.554  | 4.674  | 5.009  | 5.010  | 5.849  | 5.805  | 102294 | CYP4V2    | NM_133969_8_-1  |
| Ankrd10       | 5.842  | 5.795  | 5.216  | 5.139  | 5.132  | 5.033  | 5.110  | 5.079  | 5.114  | 4.969  | 102334 | ANKRD10   | NM_133971_8_-1  |
| Armc6         | 2.126  | 2.868  | 2.346  | 2.471  | 2.035  | 2.008  | 1.955  | 2.107  | 2.272  | 2.182  | 76813  | ARMC6     | NM_133972_8_-1  |
| Cog4          | 4.662  | 4.928  | 5.336  | 5.316  | 5.023  | 5.029  | 5.049  | 5.149  | 5.429  | 5.297  | 102339 | COG4      | NM_133973_8_+1  |
| Cdcp1         | -4.981 | -4.981 | -1.517 | -0.433 | 3.519  | 3.421  | 0.338  | -0.743 | -4.981 | -2.988 | 109332 | CDCP1     | NM_133974_9_-1  |
| Trip12        | 5.538  | 5.595  | 6.399  | 6.234  | 6.335  | 6.309  | 6.178  | 5.953  | 6.297  | 6.670  | 14897  | TRIP12    | NM_133975_1_-1  |
| Imp3          | 6.471  | 6.347  | 5.352  | 5.476  | 5.126  | 5.309  | 5.377  | 5.425  | 4.586  | 4.457  | 102462 | IMP3      | NM_133976_9_+1  |
| Trf           | 7.054  | 6.317  | 7.582  | 7.427  | 7.017  | 6.272  | 8.123  | 9.470  | 9.646  | 11.141 | 22041  | TF        | NM_133977_9_-1  |
| Cmtm7         | 8.197  | 8.184  | 6.787  | 7.037  | 5.381  | 5.644  | 6.678  | 7.060  | 7.876  | 7.870  | 102545 | CMTM7     | NM_133978_9_-1  |
| Ano10         | 3.673  | 3.686  | 4.215  | 4.100  | 3.646  | 3.382  | 3.819  | 3.737  | 4.206  | 3.615  | 102566 | ANO10     | NM_133979_9_-1  |
| Slc22a13      | -3.668 | -4.981 | -4.503 | -4.990 | -4.981 | -4.981 | -4.976 | -4.900 | -4.981 | -4.981 | 102570 | SLC22A13  | NM_133980_9_-1  |
| Alg9          | 4.005  | 3.847  | 3.570  | 4.205  | 2.930  | 2.901  | 3.258  | 3.637  | 3.803  | 3.791  | 102580 | ALG9      | NM_133981_9_+1  |
| Rpp25         | -4.981 | -4.981 | -4.974 | -3.681 | -4.175 | -4.899 | -3.931 | -3.819 | -4.981 | -4.981 | 102614 | RPP25     | NM_133982_9_+1  |
| Cd276         | 1.338  | 1.015  | -4.986 | -2.156 | -0.581 | 0.648  | -0.170 | 1.404  | 0.086  | 1.975  | 102657 | CD276     | NM_133983_9_-1  |
| Hemk1         | 2.840  | 4.153  | 2.047  | 3.515  | 2.665  | 3.745  | 2.470  | 3.361  | 1.315  | 2.386  | 69536  | HEMK1     | NM_133984_9_-1  |
| Oxsr1         | 3.298  | 3.586  | 4.310  | 4.324  | 4.227  | 4.308  | 4.381  | 4.360  | 4.674  | 4.536  | 108737 | OXSR1     | NM_133985_9_-1  |
| Tcta          | 5.456  | 5.600  | 4.298  | 4.318  | 4.301  | 4.468  | 4.087  | 4.118  | 4.243  | 3.955  | 102791 | TCTA      | NM_133986_9_-1  |
| Slc6a8        | -3.674 | -3.800 | -4.388 | -4.249 | -3.644 | -4.318 | -4.021 | -4.503 | -4.981 | -4.098 | 102857 | SLC6A8    | NM_133987_X_+1  |
| Il13ra1       | 3.503  | 4.860  | 6.091  | 6.312  | 5.060  | 4.726  | 7.419  | 7.639  | 8.396  | 8.935  | 16164  | IL13RA1   | NM_133990_X_+1  |
| Ftsj1         | 1.980  | 2.813  | 1.820  | 0.835  | 0.945  | 0.697  | 0.730  | 0.292  | 1.862  | 0.837  | 54632  | FTSJ1     | NM_133991_X_-1  |
| Pan2          | 3.041  | 2.985  | 3.095  | 2.830  | 3.815  | 3.509  | 3.790  | 3.510  | 3.837  | 3.946  | 103135 | PAN2      | NM_133992_10_+1 |
| Pwp1          | 4.871  | 4.997  | 5.190  | 5.256  | 5.134  | 5.160  | 4.814  | 4.992  | 5.015  | 5.071  | 103136 | PWP1      | NM_133993_10_+1 |
| Gstt3         | 1.408  | 1.788  | 3.381  | 4.154  | 2.992  | 3.573  | 3.714  | 3.129  | 1.996  | 1.982  | 103140 | NA        | NM_133994_10_-1 |
| Upb1          | 9.377  | 9.183  | 1.864  | 0.950  | -0.497 | 0.833  | 2.311  | 2.585  | 2.433  | 1.027  | 103149 | UPB1      | NM_133995_10_+1 |
| Apon          | -4.981 | -4.981 | -4.657 | -2.029 | -2.832 | -4.259 | -3.162 | -2.684 | -2.685 | -4.981 | 28194  | NA        | NM_133996_10_+1 |
| Apop          | 2.222  | 1.695  | -1.203 | -1.558 | 2.543  | 2.255  | 0.882  | 0.224  | -3.022 | -2.266 | 103161 | APOF      | NM_133997_10_+1 |
| Fam207a       | 4.967  | 4.889  | 5.379  | 5.364  | 5.233  | 5.139  | 5.075  | 4.981  | 5.194  | 5.110  | 108707 | FAM207A   | NM_133998_10_-1 |
| Fig4          | 4.839  | 5.058  | 4.924  | 5.230  | 4.923  | 5.080  | 4.926  | 5.123  | 5.728  | 5.861  | 103199 | FIG4      | NM_133999_10_-1 |
| Traf3ip2      | 4.018  | 3.577  | 3.499  | 3.738  | 3.264  | 3.094  | 2.341  | 2.969  | 2.163  | 1.975  | 103213 | TRAF3IP2  | NM_134000_10_+1 |
| Csnk1g2       | 4.324  | 3.529  | 3.948  | 3.970  | 4.011  | 3.717  | 3.868  | 4.068  | 4.583  | 4.207  | 103236 | CSNK1G2   | NM_134002_10_+1 |
| Zc3h10        | 4.516  | 4.694  | 4.705  | 4.476  | 4.672  | 4.675  | 4.629  | 4.499  | 4.738  | 4.690  | 103284 | ZC3H10    | NM_134003_10_-1 |
| Enpp3         | -4.981 | -1.991 | -5.004 | -4.077 | -4.982 | -1.508 | -4.959 | -0.699 | -4.981 | -2.338 | 209558 | ENPP3     | NM_134005_10_-1 |
| Rdh5          | 0.466  | 0.671  | -0.046 | 0.025  | -0.491 | 0.484  | -1.164 | -0.316 | -0.319 | -0.136 | 19682  | RDH5      | NM_134006_10_-1 |
| Cisd1         | 6.004  | 5.977  | 5.358  | 5.458  | 5.509  | 5.348  | 5.327  | 4.828  | 5.377  | 4.718  | 52637  | CISD1     | NM_134007_10_-1 |
| Ncln          | 4.931  | 4.563  | 5.071  | 5.249  | 4.815  | 4.958  | 5.559  | 5.733  | 7.149  | 6.697  | 103425 | NCLN      | NM_134009_10_-1 |
| Nup107        | 4.443  | 4.364  | 4.058  | 4.136  | 4.602  | 4.187  | 4.551  | 4.496  | 5.186  | 4.592  | 103468 | NUP107    | NM_134010_10_-1 |
| Tbrg4         | 3.511  | 4.180  | 2.762  | 3.622  | 2.547  | 3.260  | 2.547  | 3.205  | 1.864  | 2.616  | 21379  | TBRG4     | NM_134011_11_-1 |
| Mbtd1         | 4.468  | 4.014  | 5.298  | 4.997  | 5.274  | 4.962  | 5.120  | 4.552  | 4.534  | 4.776  | 103537 | MBTD1     | NM_134012_11_+1 |
| Psme4         | 4.457  | 4.762  | 5.224  | 4.830  | 5.140  | 5.023  | 5.137  | 4.812  | 5.631  | 5.147  | 103554 | PSME4     | NM_134013_11_+1 |
| Xpo1          | 1.289  | -0.494 | 2.579  | 2.675  | 3.440  | 2.424  | 2.776  | 2.127  | 2.851  | 2.849  | 103573 | XPO1      | NM_134014_11_+1 |
| Fbxw11        | 1.206  | -2.812 | 0.097  | -1.421 | 0.535  | 1.969  | -3.263 | -4.285 | 1.064  | 0.209  | 103583 | FBXW11    | NM_134015_11_+1 |
| Mat2b         | 7.322  | 7.488  | 6.456  | 6.273  | 6.723  | 6.761  | 7.022  | 6.851  | 6.911  | 7.009  | 108645 | MAT2B     | NM_134017_11_-1 |
| Tmed4         | 6.678  | 6.605  | 5.909  | 6.012  | 6.122  | 6.248  | 5.857  | 5.943  | 6.033  | 5.825  | 103694 | TMED4     | NM_134020_11_-1 |
| Pnpo          | 5.153  | 5.197  | 5.778  | 6.164  | 6.726  | 6.814  | 6.140  | 6.011  | 5.779  | 5.626  | 103711 | PNPO      | NM_134021_11_-1 |
| 6330403K07Rik | -4.981 | -4.981 | -4.960 | -4.552 | -3.925 | -4.731 | -4.920 | -4.800 | -4.981 | -4.981 | 103712 | LOC728392 | NM_134022_11_-1 |
| Tbc1d10a      | 3.892  | 4.029  | 5.446  | 5.435  | 5.331  | 5.297  | 4.989  | 5.028  | 4.317  | 4.817  | 103724 | TBC1D10A  | NM_134023_11_+1 |
| Tubg1         | 5.122  | 5.251  | 3.955  | 4.420  | 4.577  | 4.599  | 4.021  | 4.206  | 3.524  | 3.431  | 103733 | TUBG1     | NM_134024_11_+1 |
| Pex12         | 3.774  | 3.656  | 3.383  | 2.906  | 3.285  | 3.047  | 2.921  | 2.800  | 2.833  | 2.802  | 103737 | PEX12     | NM_134025_11_-1 |
| Med1          | 4.539  | 4.425  | 4.539  | 4.384  | 4.666  | 4.568  | 4.415  | 4.165  | 4.149  | 4.389  | 19014  | MED1      | NM_134027_11_-1 |
| Tubg2         | 0.833  | 1.418  | -3.710 | -0.055 | -2.802 | -2.279 | -2.845 | -0.106 | -4.981 | -2.970 | 103768 | TUBG2     | NM_134028_11_+1 |
| Nt5m          | 6.048  | 5.895  | 4.475  | 4.439  | 5.001  | 4.915  | 4.317  | 4.226  | 3.541  | 3.343  | 103850 | NT5M      | NM_134029_11_+1 |
| Hoxb2         | -4.981 | -4.981 | -4.624 | -3.815 | -3.703 | -4.170 | -4.532 | -2.428 | -2.989 | -3.797 | 103889 | HOXB2     | NM_134032_11_+1 |
| Ccdc117       | 4.396  | 4.122  | 4.685  | 4.306  | 4.591  | 4.282  | 4.860  | 4.877  | 5.441  | 5.707  | 104479 | CCDC117   | NM_134033_11_-1 |
| Smek2         | 6.464  | 6.516  | 6.849  | 7.000  | 6.727  | 6.903  | 6.920  | 6.991  | 6.953  | 7.481  | 104570 | PPP4R3B   | NM_134034_11_+1 |
| Acly          | 4.682  | 4.158  | 5.531  | 5.370  | 5.073  | 5.036  | 5.398  | 5.878  | 6.929  | 7.382  | 104112 | ACLY      | NM_134037_11_-1 |
| Slc16a6       | -0.865 | 1.473  | 2.787  | 3.567  | 1.686  | 3.852  | 1.479  | 2.721  | 2.663  | 3.035  | 104681 | SLC16A6   | NM_134038_11_-1 |
| Ddx1          | 5.493  | 5.533  | 4.566  | 5.028  | 4.915  | 5.392  | 5.262  | 5.482  | 5.455  | 5.299  | 104721 | DDX1      | NM_134040_12_-1 |
| 4930427A07Rik | 0.251  | 0.366  | 1.623  | 1.123  | 2.116  | 1.387  | 1.301  | 0.923  | 0.762  | 0.490  | 104732 | C14orf80  | NM_134041_12_+1 |
| Aldh6a1       | 3.363  | 3.787  | 2.810  | 2.786  | 2.407  | 2.699  | 2.418  | 3.349  | 2.962  | 3.689  | 104776 | ALDH6A1   | NM_134042_12_-1 |
| Vipas39       | -4.648 | -3.255 | -0.137 | -1.098 | -3.006 | -2.907 | -1.997 | -2.571 | -1.263 | 0.149  | 104799 | VIPAS39   | NM_134044_12_-1 |
| Cenpo         | 3.257  | 3.317  | 3.341  | 3.413  | 3.556  | 3.297  | 3.572  | 3.435  | 3.234  | 3.216  | 52504  | CENPO     | NM_134046_12_-1 |
| Cbll1         | 0.268  | 1.602  | 1.478  | 0.996  | 0.597  | 0.708  | 1.402  | 0.521  | 1.992  | 2.008  | 104836 | CBLL1     | NM_134048_12_-1 |
| Adi1          | 6.777  | 7.614  | 5.221  | 5.449  | 5.180  | 5.560  | 5.027  | 5.437  | 3.942  | 4.445  | 104923 | ADI1      | NM_134052_12_+1 |
| Sptssa        | 8.706  | 9.304  | 7.348  | 7.450  | 7.417  | 7.651  | 7.437  | 7.387  | 6.609  | 6.915  | 104725 | SPTSSA    | NM_134054_12_-1 |
| Pelo          | 2.644  | 2.088  | 2.640  | 2.020  | 1.528  | 1.185  | 2.194  | 1.779  | 2.538  | 2.174  | 105083 | PELO      | NM_134058_13_-1 |
| Ddx41         | 5.649  | 5.552  | 5.304  | 5.490  | 5.311  | 5.442  | 5.369  | 5.899  | 6.419  | 6.479  | 72935  | DDX41     | NM_134059_13_-1 |
| Slc35b3       | 5.539  | 5.589  | 4.841  | 4.837  | 4.664  | 4.768  | 4.540  | 4.479  | 4.363  | 4.470  | 108652 | SLC35B3   | NM_134060_13_-1 |
| Dapk1         | -4.981 | -0.051 | -1.742 | 0.497  | -0.485 | -1.528 | 0.049  | -0.349 | 1.399  | 1.638  | 69635  | DAPK1     | NM_134062_13_+1 |
| Fam208b       | 4.444  | 4.792  | 5.305  | 4.872  | 5.218  | 5.175  | 4.426  | 4.555  | 3.943  | 3.875  | 105203 | FAM208B   | NM_134063_13_-1 |
| Rnf44         | 2.561  | 2.878  | 2.183  | 1.666  | 3.627  | 2.907  | 1.968  | 2.544  | 3.103  | 2.820  | 105239 | RNF44     | NM_134064_13_-1 |
| Epdri         | -4.981 | -1.205 | -2.970 | 1.565  | -0.701 | 1.763  | -1.551 | 2.445  | -1.785 | -0.304 | 105298 | EPDR1     | NM_134065_13_-1 |
| Akr1c18       | -4.981 | -4.981 | -4.981 | -4.981 | -4.981 | -4.981 | -4.981 | -4.981 | -1.646 | -3.461 | 105349 | AKR1C3    | NM_134066_13_-1 |
| AW209491      | 3.329  | 3.162  | 2.819  | 2.609  | 2.898  | 2.099  | 2.198  | 2.319  | 2.890  | 2.454  | 105351 | C7orf25   | NM_134067_13_+1 |
| Dusp22        | 4.328  | 4.209  | 3.299  | 3.312  | 4.241  | 4.535  | 4.590  | 4.340  | 5.086  | 4.976  | 105352 | DUSP22    | NM_134068_13_+1 |

|          |        |        |        |        |        |        |        |        |        |        |        |          |                 |
|----------|--------|--------|--------|--------|--------|--------|--------|--------|--------|--------|--------|----------|-----------------|
| Slf1     | 4.509  | 4.408  | 3.297  | 2.898  | 4.196  | 3.840  | 3.679  | 3.225  | 2.246  | 2.195  | 105377 | SLF1     | NM_134071_13_-1 |
| Kctd9    | 1.396  | 0.886  | 1.505  | 2.040  | 2.087  | 1.925  | 1.331  | 1.048  | 1.559  | 0.376  | 105440 | KCTD9    | NM_134073_14_+1 |
| Dock9    | 0.555  | -0.423 | 1.509  | 1.418  | 1.326  | 0.960  | -0.066 | 0.293  | -1.750 | -1.341 | 105445 | DOCK9    | NM_134074_14_-1 |
| Abhd4    | 5.685  | 5.473  | 5.598  | 5.473  | 5.229  | 6.307  | 5.243  | 5.631  | 5.949  | 6.069  | 105501 | ABHD4    | NM_134076_14_+1 |
| Rbm26    | 5.464  | 5.719  | 5.786  | 5.593  | 5.772  | 5.758  | 5.201  | 5.199  | 4.135  | 4.818  | 74213  | RBM26    | NM_134077_14_-1 |
| Chmp7    | 4.801  | 4.893  | 5.210  | 5.466  | 4.883  | 5.047  | 4.933  | 5.140  | 5.569  | 5.653  | 105513 | CHMP7    | NM_134078_14_-1 |
| Adk      | 7.170  | 7.229  | 4.010  | 4.451  | 3.344  | 3.750  | 2.986  | 3.937  | 3.712  | 4.026  | 11534  | ADK      | NM_134079_14_+1 |
| Flnb     | 3.392  | 3.326  | 5.798  | 5.495  | 6.272  | 5.891  | 5.662  | 4.957  | 2.146  | 2.059  | 286940 | FLNB     | NM_134080_14_+1 |
| Dnajc9   | 7.088  | 7.079  | 5.994  | 5.919  | 6.421  | 6.377  | 5.733  | 5.814  | 4.128  | 4.104  | 108671 | DNAJC9   | NM_134081_14_-1 |
| Farp1    | 1.320  | 1.639  | -0.051 | -1.032 | -0.187 | 0.207  | -0.601 | -1.797 | -2.239 | -1.029 | 223254 | FARP1    | NM_134082_14_+1 |
| Rcbtb2   | -2.895 | -1.719 | -1.046 | -1.588 | -2.197 | -4.666 | -2.982 | -3.210 | -0.672 | -0.427 | 105670 | RCBTB2   | NM_134083_14_+1 |
| Ppif     | 7.164  | 6.515  | 4.531  | 4.713  | 5.091  | 4.798  | 4.771  | 4.646  | 4.167  | 4.210  | 105675 | PPIF     | NM_134084_14_+1 |
| Slc38a1  | 5.589  | 5.092  | 5.201  | 4.597  | 6.278  | 5.548  | 5.145  | 4.087  | 3.905  | 3.341  | 105727 | SLC38A1  | NM_134086_15_-1 |
| Fam83h   | -3.842 | -4.981 | -0.188 | -0.343 | -1.138 | -2.120 | -3.733 | -4.655 | -2.627 | -3.344 | 105732 | FAM83H   | NM_134087_15_-1 |
| Scrib    | 1.543  | 1.327  | 2.730  | 2.809  | 2.834  | 2.420  | 3.132  | 2.819  | 3.066  | 3.472  | 105782 | SCRIB    | NM_134089_15_-1 |
| Kdelr3   | -2.483 | -4.981 | -0.687 | -0.720 | -3.284 | -3.219 | -2.770 | -1.468 | -4.981 | -2.976 | 105785 | KDEL3    | NM_134090_15_+1 |
| Sgsm3    | 3.671  | 3.739  | 4.481  | 4.435  | 2.928  | 3.461  | 2.691  | 3.141  | 2.739  | 3.727  | 105835 | SGSM3    | NM_134091_15_+1 |
| Mtbp     | 2.238  | 2.376  | 2.741  | 2.427  | 3.447  | 2.979  | 2.817  | 2.515  | 1.922  | 1.433  | 105837 | MTBP     | NM_134092_15_+1 |
| Letmd1   | 4.855  | 4.558  | 4.612  | 4.163  | 4.505  | 4.256  | 4.419  | 4.155  | 4.303  | 3.791  | 68614  | LETMD1   | NM_134093_15_+1 |
| Ncald    | 1.896  | 3.375  | -4.890 | -3.680 | -4.932 | -4.963 | -4.913 | -1.702 | -4.981 | -4.981 | 52589  | NCALD    | NM_134094_15_-1 |
| Desi1    | 4.952  | 3.273  | 4.228  | 2.745  | 4.112  | 1.945  | 4.266  | 2.516  | 4.550  | 1.032  | 28075  | DESI1    | NM_134095_15_-1 |
| Topors   | 4.532  | 4.727  | 5.207  | 5.183  | 4.990  | 4.955  | 5.112  | 5.105  | 5.202  | 5.408  | 106021 | TOPORS   | NM_134097_4_-1  |
| Fbxo4    | 4.519  | 4.655  | 5.151  | 5.192  | 0.097  | 1.355  | 4.422  | 4.983  | 5.316  | 5.445  | 106052 | FBXO4    | NM_134099_15_-1 |
| Mfsd5    | 6.421  | 6.305  | 6.486  | 6.458  | 6.098  | 6.034  | 6.617  | 6.697  | 7.693  | 7.398  | 106073 | MFSD5    | NM_134100_15_+1 |
| Psm2     | 6.552  | 6.669  | 7.355  | 7.669  | 7.318  | 7.255  | 7.137  | 7.388  | 7.806  | 7.847  | 21762  | PSMD2    | NM_134101_16_+1 |
| Pla1a    | -4.981 | -4.981 | -0.373 | -2.012 | -0.808 | -1.140 | -1.762 | -2.324 | -2.712 | -0.304 | 85031  | PLA1A    | NM_134102_16_-1 |
| Il1rap   | 1.130  | 0.884  | 0.369  | 0.318  | -1.882 | -2.039 | -0.059 | 0.411  | 1.923  | 1.065  | 16180  | IL1RAP   | NM_134103_16_+1 |
| Txn1dc11 | -4.696 | -4.747 | -4.252 | -4.777 | -2.169 | -4.671 | -1.410 | -4.611 | -4.756 | -4.962 | 106200 | TXNDC11  | NM_134105_16_-1 |
| Ildr1    | -4.981 | -4.981 | 0.898  | 1.186  | -2.352 | -3.674 | -1.729 | -1.117 | -4.165 | -4.622 | 106347 | ILDR1    | NM_134109_16_+1 |
| Eaf2     | -0.602 | -0.958 | -0.650 | -0.967 | -0.929 | -0.682 | -0.866 | -1.914 | -2.478 | -4.227 | 106389 | EAF2     | NM_134111_16_-1 |
| Kctd1    | -0.647 | 0.529  | 0.605  | 0.066  | -0.502 | -0.526 | -0.370 | -0.454 | -0.672 | -0.700 | 106931 | KCTD1    | NM_134112_18_-1 |
| Sft2d1   | 7.548  | 7.674  | 7.288  | 7.235  | 7.292  | 7.455  | 7.151  | 6.989  | 7.142  | 6.645  | 106489 | SFT2D1   | NM_134114_17_+1 |
| Stk38    | 5.524  | 5.563  | 6.950  | 6.826  | 6.776  | 7.032  | 7.414  | 7.338  | 8.787  | 8.566  | 106504 | STK38    | NM_134115_17_-1 |
| Gpsm3    | 5.825  | 5.871  | 6.955  | 7.108  | 7.158  | 7.034  | 6.958  | 6.713  | 6.721  | 6.583  | 106512 | GPSM3    | NM_134116_17_+1 |
| Pkdcc    | 2.308  | 2.698  | 2.961  | 2.525  | 0.586  | -0.146 | 1.545  | 1.610  | 3.010  | 2.966  | 106522 | PKDCC    | NM_134117_17_+1 |
| Tecr     | 8.507  | 8.722  | 7.059  | 7.565  | 7.311  | 7.435  | 7.336  | 7.827  | 7.186  | 7.380  | 106529 | TECR     | NM_134118_8_-1  |
| Nrm      | 5.192  | 5.176  | 4.779  | 4.487  | 6.982  | 6.492  | 6.447  | 5.843  | 5.755  | 5.046  | 106582 | NRM      | NM_134122_17_+1 |
| Scaf8    | 4.473  | 4.525  | 4.824  | 4.539  | 5.085  | 5.013  | 4.834  | 4.841  | 5.283  | 5.203  | 106583 | SCAF8    | NM_134123_17_+1 |
| Trip10   | 0.382  | 0.248  | 2.684  | 3.237  | 1.353  | 1.332  | 2.000  | 1.773  | 2.743  | 2.308  | 106628 | TRIP10   | NM_134125_17_+1 |
| Ift140   | 2.725  | 3.115  | 3.841  | 4.068  | 6.257  | 5.939  | 5.180  | 4.735  | 4.225  | 4.487  | 106633 | IFT140   | NM_134126_17_+1 |
| Cyp4f15  | -4.981 | -4.981 | -4.981 | -4.981 | -3.331 | -2.247 | -3.515 | -4.897 | -4.981 | -4.981 | 106648 | CYP4F8   | NM_134127_17_+1 |
| Prpf19   | 4.487  | 4.723  | 6.181  | 5.725  | 5.049  | 4.859  | 5.165  | 5.476  | 5.475  | 5.295  | 28000  | PRPF19   | NM_134129_19_+1 |
| Abhd3    | -0.732 | -0.524 | -2.542 | -0.959 | -2.655 | -3.418 | -2.225 | -2.816 | -1.004 | 0.189  | 106861 | ABHD3    | NM_134130_18_-1 |
| Tnfaip8  | 7.888  | 7.803  | 7.433  | 7.233  | 7.461  | 7.297  | 7.220  | 6.506  | 6.978  | 6.835  | 106869 | TNFAIP8  | NM_134131_18_+1 |
| Smim3    | 5.958  | 5.966  | 5.327  | 4.748  | 6.195  | 5.677  | 6.250  | 5.750  | 5.591  | 5.691  | 106878 | SMIM3    | NM_134133_18_-1 |
| Hmgxb3   | 0.994  | 2.976  | 2.826  | 3.229  | 3.120  | 3.151  | 3.112  | 3.052  | 3.976  | 3.862  | 106894 | HMGXB3   | NM_134134_18_-1 |
| Slc39a3  | 3.879  | 3.712  | 3.166  | 3.232  | 3.316  | 3.490  | 3.393  | 3.712  | 4.252  | 3.990  | 106947 | SLC39A3  | NM_134135_10_-1 |
| Fbxo38   | 4.636  | 4.525  | 5.281  | 5.081  | 5.197  | 5.275  | 5.384  | 5.294  | 6.184  | 6.233  | 107035 | NA       | NM_134136_18_-1 |
| Lars     | 5.390  | 5.463  | 5.948  | 6.090  | 5.519  | 5.865  | 5.281  | 5.704  | 5.295  | 5.394  | 107045 | LARS     | NM_134137_18_-1 |
| Psmg2    | 5.960  | 6.287  | 5.043  | 5.451  | 5.440  | 5.853  | 5.296  | 5.714  | 3.748  | 4.412  | 107047 | PSMG2    | NM_134138_18_+1 |
| Wdr74    | 6.068  | 6.092  | 5.380  | 5.386  | 5.304  | 5.288  | 5.214  | 5.337  | 4.729  | 4.522  | 107071 | WDR74    | NM_134139_19_+1 |
| Ciapin1  | 5.546  | 6.149  | 5.748  | 5.887  | 5.384  | 5.861  | 5.309  | 6.010  | 5.276  | 5.610  | 109006 | CIAPIN1  | NM_134141_8_-1  |
| Tmem109  | 5.066  | 5.072  | 5.124  | 5.032  | 5.771  | 5.562  | 5.962  | 5.848  | 6.791  | 6.550  | 68539  | TMEM109  | NM_134142_19_-1 |
| MacroD1  | 2.918  | 2.016  | 1.435  | 0.553  | 0.978  | 0.574  | 1.449  | 1.866  | 3.234  | 2.808  | 107227 | MACROD1  | NM_134147_19_+1 |
| Carns1   | 2.663  | 2.471  | 2.362  | 2.221  | 3.100  | 2.639  | 2.320  | 2.164  | 1.705  | 0.958  | 107239 | CARNS1   | NM_134148_19_-1 |
| Al837181 | 4.613  | 4.520  | 3.726  | 3.973  | 3.727  | 3.934  | 4.144  | 4.003  | 4.253  | 4.190  | 107242 | C11orf68 | NM_134149_19_+1 |
| Otub1    | 6.614  | 6.581  | 6.412  | 6.492  | 6.283  | 6.059  | 6.076  | 6.032  | 6.030  | 5.683  | 107260 | NA       | NM_134150_19_-1 |
| Yars     | 4.942  | 5.118  | 5.068  | 5.160  | 4.778  | 4.856  | 4.588  | 4.900  | 3.978  | 4.010  | 107271 | YARS     | NM_134151_4_+1  |
| Lpxn     | 5.984  | 5.411  | 6.730  | 6.741  | 6.898  | 6.403  | 6.764  | 6.392  | 5.990  | 5.150  | 107321 | LPXN     | NM_134152_19_+1 |
| Slc25a45 | 5.394  | 5.472  | 6.214  | 6.430  | 5.958  | 6.195  | 6.407  | 6.570  | 7.011  | 7.051  | 107375 | SLC25A45 | NM_134154_19_+1 |
| Brms1    | 6.371  | 6.084  | 5.859  | 5.829  | 6.071  | 5.803  | 6.043  | 5.864  | 6.047  | 5.411  | 107392 | BRMS1    | NM_134155_19_+1 |
| Actn1    | 2.800  | 1.954  | 5.415  | 6.179  | 4.899  | 5.138  | 3.300  | 3.024  | 0.795  | -0.174 | 109711 | ACTN1    | NM_134156_12_-1 |
| Cd300c2  | 6.775  | 6.046  | 6.055  | 6.376  | 7.229  | 7.811  | 8.022  | 8.174  | 7.164  | 7.217  | 140497 | CD300C   | NM_134158_11_-1 |
| Il17rc   | -0.901 | -1.766 | -1.280 | -2.420 | -3.669 | -4.119 | -4.140 | -2.186 | -0.631 | 0.045  | 171095 | IL17RC   | NM_134159_6_+1  |
| Mcoln3   | -1.271 | -0.102 | -3.126 | -3.334 | -4.963 | -2.732 | -4.069 | -1.123 | -4.981 | -2.519 | 171166 | MCOLN3   | NM_134160_3_+1  |
| Fut10    | -2.193 | 0.654  | -3.896 | -0.027 | -3.184 | 0.716  | -4.275 | 0.521  | -4.102 | 0.882  | 171167 | FUT10    | NM_134161_8_+1  |
| Mbnl3    | 3.121  | 3.263  | 4.344  | 4.127  | 4.361  | 4.002  | 4.477  | 3.763  | 3.712  | 3.691  | 171170 | MBNL3    | NM_134163_X_-1  |
| Syt12    | -2.901 | -4.981 | -2.437 | -3.152 | -1.807 | -2.974 | -2.373 | -1.570 | -1.526 | -2.108 | 171180 | SYT12    | NM_134164_19_-1 |
| Acot2    | 2.230  | 1.691  | 1.691  | 1.225  | 1.049  | 0.620  | 1.173  | 0.998  | 1.177  | 0.128  | 171210 | ACOT2    | NM_134188_12_+1 |
| Galtnt10 | 2.389  | 1.934  | 5.191  | 4.741  | 2.694  | 3.449  | 4.600  | 4.793  | 5.993  | 5.847  | 171212 | GALNT10  | NM_134189_11_+1 |
| Acot4    | -2.501 | -4.981 | -3.069 | -3.455 | -3.575 | -2.860 | -2.167 | -2.598 | -4.981 | -2.804 | 171282 | ACOT4    | NM_134247_12_+1 |
| Havcr1   | -1.340 | 7.216  | -4.214 | 0.761  | -4.887 | -1.337 | -4.566 | -0.550 | -4.981 | -4.699 | 171283 | NA       | NM_134248_11_+1 |
| Timd2    | -4.944 | -4.761 | -4.975 | -4.874 | -4.780 | -4.949 | -4.947 | -4.933 | -4.981 | -4.904 | 171284 | NA       | NM_134249_11_-1 |
| Havcr2   | 3.415  | 4.842  | 9.046  | 8.927  | 7.554  | 8.361  | 7.275  | 7.529  | 5.578  | 6.573  | 171285 | HAVCR2   | NM_134250_11_+1 |

|               |        |        |        |        |        |        |        |        |        |        |        |                  |                 |
|---------------|--------|--------|--------|--------|--------|--------|--------|--------|--------|--------|--------|------------------|-----------------|
| Slc12a8       | 0.951  | 0.325  | -3.325 | -4.541 | -3.766 | -4.736 | -3.038 | -4.959 | -4.450 | -4.863 | 171286 | SLC12A8          | NM_134251_16_+1 |
| Elov15        | 6.681  | 6.318  | 7.116  | 7.363  | 7.350  | 7.460  | 7.460  | 7.362  | 7.261  | 7.233  | 68801  | ELOVL5           | NM_134255_9_+1  |
| Rgs3          | 1.565  | 0.713  | 5.572  | 5.664  | 7.439  | 7.147  | 6.362  | 5.473  | 6.371  | 6.211  | 50780  | RGS3             | NM_134257_4_+1  |
| Slc26a6       | 2.783  | 2.595  | 2.567  | 2.306  | 1.923  | 2.334  | 3.371  | 3.581  | 4.319  | 4.276  | 171429 | SLC26A6          | NM_134420_9_+1  |
| Il17rd        | -4.981 | -3.048 | -0.738 | -2.632 | -3.593 | -4.482 | -1.661 | -3.852 | -0.172 | -0.908 | 171463 | IL17RD           | NM_134437_14_+1 |
| Dst           | -4.981 | -4.981 | -3.227 | -2.777 | -4.902 | -4.925 | -4.938 | -4.791 | -2.946 | -4.963 | 13518  | NA               | NM_134448_1_+1  |
| Fdps          | 8.740  | 8.882  | 6.818  | 6.427  | 5.503  | 5.411  | 5.788  | 6.403  | 5.526  | 5.779  | 110196 | FDPS             | NM_134469_3_-1  |
| Kif2c         | -0.864 | -2.476 | 2.170  | 2.802  | 2.886  | 2.484  | 2.696  | 1.480  | 1.588  | 0.263  | 73804  | KIF2C            | NM_134471_4_-1  |
| Trpm2         | 1.419  | -2.533 | 7.937  | 7.977  | 5.800  | 5.786  | 4.977  | 5.035  | 4.520  | 4.295  | 28240  | TRPM2            | NM_138301_10_-1 |
| Tymp          | 0.548  | 0.455  | 0.175  | 0.435  | -0.143 | -0.419 | -0.456 | -0.378 | 0.536  | 0.598  | 72962  | TYMP             | NM_138302_15_-1 |
| Yipf2         | 4.040  | 3.217  | 2.710  | 3.085  | 2.327  | 2.789  | 2.142  | 1.980  | 2.024  | 2.353  | 74766  | YIPF2            | NM_138303_9_-1  |
| Calml4        | -4.981 | -4.981 | -4.511 | -4.884 | -4.591 | -3.090 | -3.804 | 1.360  | -2.834 | 2.528  | 75600  | CALML4           | NM_138304_9_+1  |
| Adcy3         | -0.903 | 0.313  | -3.206 | -0.979 | -0.309 | -2.205 | -0.733 | -0.052 | -0.402 | -2.283 | 104111 | ADCY3            | NM_138305_12_+1 |
| Dgkz          | 4.577  | 5.327  | 4.552  | 4.988  | 4.847  | 4.865  | 5.624  | 5.849  | 7.549  | 7.053  | 104418 | DGKZ             | NM_138306_2_-1  |
| Cd99l2        | -0.287 | 0.282  | 1.531  | 2.498  | -2.954 | -4.453 | 0.619  | 1.016  | 2.487  | 2.997  | 171486 | CD99L2           | NM_138309_X_-1  |
| Apobr         | 1.825  | 1.168  | 6.825  | 6.774  | 6.544  | 6.669  | 6.328  | 6.085  | 7.000  | 6.645  | 171504 | APOBR            | NM_138310_7_+1  |
| Fam172a       | 2.607  | 3.460  | 1.864  | 2.283  | 2.729  | 2.816  | 1.092  | 2.339  | 1.988  | 2.726  | 68675  | FAM172A          | NM_138312_13_+1 |
| Bmf           | 1.972  | 1.653  | 4.052  | 4.025  | 3.807  | 3.530  | 4.826  | 4.195  | 4.297  | 4.122  | 171543 | BMF              | NM_138313_2_-1  |
| Nme7          | 3.231  | 3.360  | 2.033  | 2.387  | 2.105  | 2.767  | 1.764  | 2.438  | 2.152  | 1.969  | 171567 | NME7             | NM_138314_1_+1  |
| Mical1        | 4.268  | 4.184  | 6.473  | 6.459  | 6.934  | 6.847  | 6.590  | 6.369  | 6.384  | 6.166  | 171580 | MICAL1           | NM_138315_10_+1 |
| Triobp        | -2.429 | -2.245 | -3.136 | -3.289 | -2.213 | -3.959 | -3.131 | -3.621 | -2.079 | -2.300 | 110253 | TRIOBP           | NM_138579_15_+1 |
| Nelfe         | 4.584  | 4.536  | 4.428  | 4.436  | 4.401  | 4.393  | 4.197  | 3.982  | 3.718  | 3.547  | 27632  | NELFE            | NM_138580_17_+1 |
| 1700088E04Rik | -2.227 | -3.112 | -4.468 | -4.057 | -4.984 | -4.739 | -4.792 | -4.957 | -2.382 | -3.888 | 27660  | C22orf23         | NM_138581_15_-1 |
| Vwa7          | -1.644 | -0.938 | -4.048 | -4.652 | -4.939 | -4.939 | -3.381 | -4.622 | -2.552 | -3.758 | 27762  | VWA7             | NM_138582_17_+1 |
| Tango2        | 5.415  | 5.359  | 4.860  | 5.049  | 4.683  | 4.917  | 4.687  | 4.867  | 4.903  | 4.697  | 27883  | TANGO2           | NM_138583_16_-1 |
| Spg21         | 6.292  | 6.278  | 7.690  | 7.765  | 7.021  | 7.188  | 7.029  | 7.234  | 7.945  | 7.739  | 27965  | SPG21            | NM_138584_9_+1  |
| Cherp         | 4.436  | 4.521  | 5.206  | 5.173  | 5.273  | 5.174  | 5.001  | 5.031  | 5.632  | 5.325  | 27967  | CHERP            | NM_138585_8_-1  |
| Exosc5        | 6.755  | 6.436  | 6.230  | 5.874  | 6.705  | 6.756  | 6.383  | 5.820  | 4.976  | 4.460  | 27998  | EXOSC5           | NM_138586_7_+1  |
| Fam3c         | 8.274  | 8.354  | 3.982  | 4.085  | 4.332  | 4.495  | 4.615  | 4.805  | 4.198  | 5.011  | 27999  | FAM3C            | NM_138587_6_-1  |
| Ubfd1         | 5.326  | 5.463  | 6.459  | 6.578  | 5.186  | 5.239  | 5.124  | 5.422  | 5.056  | 5.129  | 28018  | UBFD1            | NM_138589_7_+1  |
| Zcchc7        | 6.370  | 6.673  | 5.896  | 5.867  | 6.105  | 6.553  | 5.742  | 5.841  | 4.854  | 4.943  | 319885 | ZCCHC7           | NM_138590_4_+1  |
| Gfm1          | 4.130  | 4.365  | 4.985  | 5.005  | 4.619  | 4.536  | 4.457  | 4.460  | 4.782  | 4.515  | 28030  | GFM1             | NM_138591_3_+1  |
| Usp39         | 5.318  | 5.215  | 5.255  | 5.339  | 5.658  | 5.339  | 5.590  | 5.322  | 5.376  | 5.026  | 28035  | USP39            | NM_138592_6_-1  |
| Larp7         | 5.307  | 5.286  | 5.224  | 5.448  | 5.503  | 5.608  | 5.409  | 5.421  | 4.318  | 4.432  | 28036  | LARP7            | NM_138593_3_-1  |
| D6Wsu163e     | 5.244  | 5.158  | 3.895  | 4.211  | 4.028  | 4.119  | 4.248  | 4.066  | 4.228  | 4.057  | 28040  | C12orf4          | NM_138594_6_+1  |
| Med10         | 8.203  | 6.977  | 6.341  | 5.875  | 6.294  | 5.932  | 6.329  | 5.850  | 5.371  | 5.205  | 28077  | MED10            | NM_138596_13_+1 |
| Atp5o         | 7.863  | 7.643  | 7.248  | 7.452  | 7.122  | 7.186  | 7.450  | 7.551  | 6.628  | 6.568  | 28080  | ATP5O            | NM_138597_16_-1 |
| Fam104a       | 6.031  | 6.013  | 5.984  | 5.935  | 6.184  | 6.018  | 6.181  | 6.046  | 5.526  | 5.561  | 28081  | FAM104A          | NM_138598_11_-1 |
| Tomm70a       | 6.560  | 6.433  | 7.068  | 6.929  | 6.438  | 6.502  | 6.407  | 6.375  | 6.109  | 6.215  | 28185  | TOMM70           | NM_138599_16_+1 |
| Aldh7a1       | 2.079  | 1.330  | 0.914  | 1.902  | 1.629  | 2.114  | 0.982  | 2.578  | -0.099 | -0.500 | 110695 | ALDH7A1          | NM_138600_18_-1 |
| D10Jhu81e     | 5.124  | 5.097  | 4.811  | 4.865  | 4.679  | 4.871  | 4.425  | 4.390  | 4.411  | 4.214  | 28295  | C21orf33 LOC1027 | NM_138601_10_-1 |
| Praf2         | 4.846  | 4.911  | 4.889  | 4.684  | 3.960  | 4.136  | 3.573  | 4.127  | 3.313  | 3.104  | 54637  | PRAF2            | NM_138602_X_+1  |
| Ccdc22        | 4.099  | 4.312  | 3.804  | 3.630  | 3.837  | 3.715  | 4.409  | 4.379  | 5.368  | 4.876  | 54638  | CCDC22           | NM_138603_X_-1  |
| Otud5         | 2.918  | 2.779  | 4.818  | 4.825  | 4.074  | 4.267  | 4.489  | 4.977  | 6.148  | 6.156  | 54644  | NA               | NM_138604_X_+1  |
| Ppp1r3f       | -1.055 | -0.344 | -0.963 | -0.334 | 0.611  | 0.195  | -1.056 | -0.685 | 0.176  | -0.191 | 54646  | PPP1R3F          | NM_138605_X_-1  |
| Pim2          | 7.532  | 7.248  | 3.681  | 5.384  | 2.733  | 4.585  | 3.301  | 5.067  | 3.024  | 3.660  | 18715  | PIM2             | NM_138606_X_+1  |
| Fam50a        | 6.504  | 6.399  | 5.978  | 6.155  | 6.098  | 6.194  | 6.218  | 6.091  | 5.675  | 5.563  | 108160 | FAM50A           | NM_138607_X_+1  |
| Txlnb         | 1.253  | 1.798  | -1.910 | -1.967 | 0.559  | -0.190 | -0.717 | -1.887 | -2.305 | -1.489 | 378431 | TXLNB            | NM_138628_10_+1 |
| Arhgap4       | 3.819  | 4.473  | 4.261  | 5.352  | 4.975  | 5.482  | 4.741  | 5.785  | 5.955  | 6.350  | 171207 | ARHGAP4          | NM_138630_X_-1  |
| Tssc4         | 0.194  | 0.207  | -1.111 | -0.377 | -0.429 | -0.342 | -0.174 | 0.329  | -0.481 | -0.336 | 56844  | TSSC4            | NM_138631_7_+1  |
| Hps4          | 3.298  | 3.068  | 4.228  | 4.619  | 3.297  | 3.368  | 3.360  | 3.448  | 3.743  | 3.713  | 192232 | HPS4             | NM_138646_5_+1  |
| Cers1         | -1.224 | -1.521 | -4.967 | -4.967 | -4.974 | -4.897 | -4.981 | -4.981 | -4.981 | -4.981 | 93898  | CERS1            | NM_138647_8_+1  |
| Olr1          | -1.325 | -0.671 | -1.983 | -2.817 | -4.886 | -4.951 | -1.470 | -2.445 | 3.201  | -0.286 | 108078 | OLR1             | NM_138648_6_-1  |
| Dgkg          | -4.981 | -3.267 | 0.590  | 1.746  | -3.161 | -3.599 | 3.006  | 3.654  | 6.016  | 6.046  | 110197 | DGKG             | NM_138650_16_-1 |
| Cds2          | 4.205  | 4.892  | 3.401  | 2.908  | 3.779  | 3.536  | 3.586  | 3.652  | 4.760  | 4.379  | 110911 | CDS2             | NM_138651_2_+1  |
| Bspry         | -1.058 | -4.981 | -4.707 | -2.565 | -3.717 | -3.221 | -3.987 | -2.533 | -3.373 | -4.981 | 192120 | BSPRY            | NM_138653_4_+1  |
| Sugct         | -1.085 | 0.983  | -1.316 | -2.303 | -1.618 | -2.103 | -1.551 | -1.872 | -2.333 | -2.629 | 192136 | SUGCT            | NM_138654_13_-1 |
| Tmc2          | -4.981 | -4.981 | -4.948 | -4.948 | -4.149 | -4.881 | -4.981 | -4.981 | -4.981 | -4.981 | 192140 | TMC2             | NM_138655_2_+1  |
| Mvd           | 5.468  | 5.326  | 3.772  | 3.280  | 3.881  | 3.698  | 4.293  | 4.104  | 4.607  | 4.914  | 192156 | MVD              | NM_138656_8_-1  |
| Socs7         | 2.863  | 2.846  | 2.967  | 2.649  | 2.588  | 2.016  | 2.383  | 2.326  | 2.433  | 2.403  | 192157 | SOC57            | NM_138657_11_+1 |
| Prpf8         | 6.021  | 5.967  | 6.500  | 6.527  | 6.823  | 6.653  | 6.522  | 6.438  | 6.628  | 6.704  | 192159 | PRPF8            | NM_138659_11_+1 |
| Casc3         | 4.664  | 4.493  | 5.708  | 5.639  | 5.787  | 5.813  | 5.880  | 5.502  | 6.074  | 5.830  | 192160 | CASC3            | NM_138660_11_+1 |
| Dnajc28       | 1.123  | 1.130  | 1.413  | 1.379  | 1.237  | 1.050  | 1.340  | 1.758  | 1.908  | 2.196  | 246738 | DNAJC28          | NM_138664_16_-1 |
| Sardh         | 1.101  | -1.260 | -4.996 | -3.719 | -3.530 | -4.640 | -4.877 | -4.388 | -4.981 | -1.969 | 192166 | SARDH            | NM_138665_2_-1  |
| Tab2          | 5.355  | 5.513  | 5.715  | 5.721  | 5.954  | 5.899  | 5.972  | 5.681  | 6.173  | 6.057  | 68652  | TAB2             | NM_138667_10_-1 |
| Ufsp2         | 5.929  | 5.968  | 6.070  | 6.151  | 6.389  | 6.209  | 6.195  | 5.908  | 5.741  | 5.900  | 192169 | UFS2             | NM_138668_8_+1  |
| Eif4a3        | 7.833  | 7.825  | 7.667  | 7.645  | 7.803  | 7.666  | 7.521  | 7.504  | 7.250  | 6.881  | 192170 | EIF4A3           | NM_138669_11_-1 |
| Mpst          | -4.584 | -4.349 | -4.804 | -2.242 | -4.884 | -3.949 | -4.713 | -4.840 | -2.164 | -4.906 | 246221 | MPST             | NM_138670_15_+1 |
| Nadk          | 3.851  | 3.490  | 5.879  | 5.932  | 7.738  | 7.699  | 8.406  | 8.432  | 9.693  | 9.813  | 192185 | NADK             | NM_138671_4_+1  |
| Stab1         | -3.673 | -4.981 | -2.899 | -3.694 | -0.527 | 1.263  | -0.638 | 0.664  | 1.090  | 0.758  | 192187 | STAB1            | NM_138672_14_-1 |
| Stab2         | 0.493  | -0.639 | 1.554  | 1.894  | 1.407  | 1.659  | 1.134  | 2.293  | 0.009  | 0.226  | 192188 | STAB2            | NM_138673_10_-1 |
| Pkhd1l1       | -4.981 | -2.437 | -4.937 | -2.903 | -3.289 | -0.813 | -3.383 | -0.499 | -4.981 | -2.885 | 192190 | PKHD1L1          | NM_138674_15_+1 |
| Med9          | 5.325  | 5.057  | 4.959  | 4.843  | 4.831  | 4.697  | 4.700  | 4.470  | 3.894  | 3.956  | 192191 | MED9             | NM_138675_11_+1 |
| Shkbp1        | 4.286  | 4.265  | 5.167  | 5.053  | 4.851  | 4.760  | 4.858  | 4.727  | 5.624  | 5.305  | 192192 | SHKBP1           | NM_138676_7_-1  |

|          |        |        |        |        |        |        |        |        |        |        |        |          |                 |
|----------|--------|--------|--------|--------|--------|--------|--------|--------|--------|--------|--------|----------|-----------------|
| Edem1    | 5.979  | 6.204  | 6.766  | 6.958  | 6.691  | 7.352  | 7.148  | 8.079  | 8.117  | 8.722  | 192193 | EDEM1    | NM_138677_6_+1  |
| Btl10    | -4.981 | -4.981 | -4.960 | -1.327 | -3.179 | -2.039 | -4.698 | -0.914 | -2.552 | -2.125 | 192194 | NA       | NM_138678_11_+1 |
| Ash11    | 5.783  | 5.917  | 6.004  | 5.999  | 6.529  | 6.533  | 6.130  | 6.009  | 5.595  | 5.703  | 192195 | ASH1L    | NM_138679_3_+1  |
| Luc7l2   | 4.500  | 4.317  | 3.518  | 3.337  | 3.900  | 3.897  | 3.910  | 2.885  | 2.983  | 3.325  | 192196 | LUC7L2   | NM_138680_6_+1  |
| Bcas3    | -4.034 | -3.270 | -1.411 | -3.037 | -1.631 | -1.883 | -4.595 | -4.884 | -4.361 | -4.454 | 192197 | BCAS3    | NM_138681_11_+1 |
| Lrrc4    | -4.981 | -2.895 | -4.218 | -3.792 | -2.557 | -4.279 | -2.719 | -4.264 | -3.471 | -2.895 | 192198 | LRRC4    | NM_138682_6_-1  |
| Rspo1    | -3.563 | -4.981 | -4.223 | -3.941 | -4.401 | -4.353 | -1.886 | -3.023 | 3.639  | 0.516  | 192199 | RSP01    | NM_138683_4_+1  |
| Gnb5     | 1.228  | 2.292  | 0.929  | 1.500  | 1.088  | 0.923  | 0.384  | 0.477  | 0.990  | 1.201  | 14697  | GNB5     | NM_138719_9_+1  |
| Lsm10    | 5.494  | 5.617  | 4.788  | 4.759  | 5.165  | 4.776  | 5.530  | 5.060  | 5.372  | 5.057  | 116748 | LSM10    | NM_138721_4_+1  |
| Sdpr     | 1.003  | -4.981 | -1.460 | 0.358  | -1.710 | -1.864 | -1.626 | -1.049 | 0.094  | -1.832 | 20324  | SDPR     | NM_138741_1_+1  |
| Nap1l3   | 3.158  | 2.926  | -0.958 | -1.164 | -2.853 | -1.646 | -3.663 | -2.512 | -4.981 | -3.855 | 54561  | NAP1L3   | NM_138742_X_-1  |
| Smim11   | 6.603  | 6.553  | 5.099  | 5.197  | 5.069  | 5.410  | 5.494  | 5.297  | 4.185  | 4.485  | 68936  | NA       | NM_138743_16_+1 |
| Ssx2ip   | 2.038  | 0.484  | 2.369  | 3.264  | 0.843  | 1.840  | -0.658 | 1.938  | 1.831  | 2.350  | 99167  | SSX2IP   | NM_138744_3_+1  |
| Mthfd1   | 3.381  | 3.855  | 4.294  | 4.915  | 4.846  | 5.116  | 4.350  | 5.460  | 3.701  | 3.746  | 108156 | MTHFD1   | NM_138745_12_+1 |
| Nop2     | 4.503  | 4.473  | 5.446  | 5.807  | 5.166  | 5.185  | 4.844  | 4.984  | 4.876  | 4.381  | 110109 | NOP2     | NM_138747_6_+1  |
| Ptpa     | 5.286  | 5.181  | 5.997  | 6.387  | 5.929  | 6.166  | 5.796  | 5.932  | 5.742  | 6.206  | 110854 | PTPA     | NM_138748_2_+1  |
| Plxnb2   | 4.715  | 4.079  | 3.529  | 2.338  | 5.939  | 5.652  | 5.433  | 5.983  | 7.752  | 7.994  | 140570 | PLXNB2   | NM_138749_15_-1 |
| Prom2    | -4.981 | -4.981 | -3.486 | -4.494 | -3.573 | -4.647 | -3.646 | -4.726 | -4.690 | -4.981 | 192212 | PROM2    | NM_138750_2_-1  |
| Plekhg2  | 0.735  | 0.336  | 0.112  | 0.902  | 2.123  | 1.240  | 1.851  | 2.024  | 2.432  | 2.605  | 101497 | PLEKHG2  | NM_138752_7_-1  |
| Hexim1   | 3.638  | 3.689  | 2.744  | 2.642  | 3.295  | 3.298  | 3.966  | 3.469  | 3.031  | 3.323  | 192231 | HEXIM1   | NM_138753_11_+1 |
| Phf21a   | 2.813  | 2.132  | 1.747  | 2.366  | 3.422  | 3.362  | 3.176  | 2.654  | 3.067  | 2.795  | 192285 | PHF21A   | NM_138755_2_+1  |
| Slc25a36 | 4.000  | 4.016  | 4.300  | 4.270  | 4.027  | 4.193  | 4.310  | 4.387  | 4.640  | 5.310  | 192287 | SLC25A36 | NM_138756_9_-1  |
| Asun     | 5.260  | 5.359  | 4.288  | 4.474  | 4.093  | 4.390  | 4.021  | 4.559  | 4.615  | 5.002  | 71177  | ASUN     | NM_138757_6_-1  |
| Zfp286   | 1.506  | 1.788  | 0.016  | 0.822  | 0.368  | 0.574  | -0.326 | 0.574  | -1.331 | 0.241  | 192651 | ZNF286A  | NM_138949_11_-1 |
| Wdr81    | 4.814  | 4.775  | 4.744  | 4.704  | 4.671  | 4.728  | 4.348  | 4.373  | 4.972  | 5.092  | 192652 | WDR81    | NM_138950_11_-1 |
| Ttc36    | -4.981 | -4.981 | -1.637 | -2.967 | -1.413 | -2.640 | -0.788 | -4.027 | -2.012 | -2.396 | 192653 | TTC36    | NM_138951_9_-1  |
| Ripk2    | 3.855  | 4.019  | 2.995  | 3.095  | 4.910  | 5.060  | 4.907  | 4.535  | 4.762  | 4.837  | 192656 | RIPK2    | NM_138952_4_-1  |
| Elf2     | 4.762  | 4.167  | 4.304  | 4.616  | 4.294  | 4.643  | 4.497  | 4.935  | 4.058  | 4.729  | 192657 | ELL2     | NM_138953_13_+1 |
| Abcg4    | -4.981 | -1.620 | -4.841 | -0.814 | -2.573 | -0.169 | -2.630 | 0.035  | -2.780 | -0.274 | 192663 | ABCG4    | NM_138955_9_-1  |
| Rassf3   | 3.729  | 4.633  | 5.683  | 6.411  | 5.573  | 6.107  | 5.870  | 6.468  | 7.177  | 8.082  | 192678 | RASSF3   | NM_138956_10_-1 |
| Nr5a1    | -4.981 | -4.981 | -3.498 | -4.156 | -3.944 | -4.172 | -4.955 | -2.699 | -4.981 | -4.981 | 26423  | NR5A1    | NM_139051_2_-1  |
| Csnk1d   | 5.562  | 6.097  | 6.051  | 5.886  | 6.144  | 6.190  | 5.808  | 5.828  | 5.981  | 5.739  | 104318 | CSNK1D   | NM_139059_11_-1 |
| Vps54    | 3.374  | 3.910  | 2.974  | 2.896  | 2.823  | 2.941  | 4.106  | 3.977  | 5.072  | 5.006  | 245944 | VP554    | NM_139061_11_+1 |
| Bloc155  | 4.906  | 5.058  | 3.933  | 4.232  | 3.580  | 3.988  | 3.687  | 4.128  | 3.388  | 3.503  | 17828  | BLOC155  | NM_139063_13_-1 |
| Tnip2    | 4.837  | 4.991  | 5.734  | 5.690  | 5.560  | 5.624  | 5.491  | 5.298  | 5.168  | 5.381  | 231130 | TNIP2    | NM_139064_5_-1  |
| Rbm47    | -2.887 | -3.832 | -3.308 | -3.304 | -4.933 | -3.774 | -1.897 | -2.414 | -4.410 | -3.759 | 245945 | RBM47    | NM_139065_5_-1  |
| Ybx3     | 5.498  | 4.824  | 3.794  | 3.818  | 3.329  | 3.078  | 3.823  | 4.436  | 4.139  | 4.494  | 56449  | YBX3     | NM_139117_6_-1  |
| Adgre4   | 3.531  | -0.060 | 3.247  | 2.788  | 4.815  | 4.040  | 8.720  | 9.312  | 8.927  | 9.955  | 52614  | NA       | NM_139138_17_+1 |
| Dnajc17  | 4.992  | 4.824  | 3.698  | 2.792  | 3.846  | 3.123  | 3.651  | 2.702  | 2.970  | 1.829  | 69408  | DNAJC17  | NM_139139_2_-1  |
| Spats2   | -3.349 | -2.600 | 0.638  | 1.961  | 2.966  | 3.574  | 1.005  | 0.876  | -4.981 | -2.255 | 72572  | SPATS2   | NM_139140_15_+1 |
| Zkscan8  | 1.512  | 1.108  | 2.805  | 2.331  | 2.735  | 3.411  | 1.889  | 2.063  | 1.935  | 3.037  | 93681  | ZKSCAN8  | NM_139141_13_-1 |
| Slc6a20a | -4.981 | -4.981 | 0.205  | 0.657  | 0.248  | -0.224 | 0.824  | 0.583  | -2.659 | -1.381 | 102680 | SLC6A20  | NM_139142_9_-1  |
| Slc39a6  | 4.277  | 4.310  | 4.298  | 4.352  | 4.964  | 4.980  | 4.541  | 4.563  | 4.191  | 4.458  | 106957 | SLC39A6  | NM_139143_18_-1 |
| Ogt      | 6.785  | 7.313  | 7.018  | 6.766  | 6.682  | 7.021  | 6.530  | 6.783  | 6.932  | 7.291  | 108155 | OGT      | NM_139144_X_+1  |
| Hlcs     | 2.983  | 2.516  | 4.549  | 4.424  | 5.315  | 5.197  | 5.139  | 4.656  | 5.677  | 5.062  | 110948 | HLCS     | NM_139145_16_-1 |
| Satb2    | -3.668 | -1.972 | -1.493 | -0.912 | -2.618 | -1.751 | -1.229 | -0.125 | 0.508  | 0.662  | 212712 | SATB2    | NM_139146_1_-1  |
| Rab40b   | -4.981 | -4.981 | -3.276 | -2.229 | -4.474 | -4.520 | -4.921 | -4.264 | -4.981 | -4.981 | 217371 | RAB40B   | NM_139147_11_-1 |
| Fus      | 5.820  | 5.618  | 5.966  | 5.853  | 6.565  | 6.385  | 5.893  | 5.583  | 5.385  | 4.922  | 233908 | NA       | NM_139149_7_+1  |
| Carf     | -1.417 | 1.422  | 0.209  | -1.975 | -0.062 | -0.079 | -1.264 | -1.982 | -2.334 | -1.319 | 241066 | CARF     | NM_139150_1_+1  |
| Spag4    | -2.355 | -2.587 | -1.418 | -2.636 | -2.950 | -2.712 | -2.862 | -2.552 | -3.134 | -2.734 | 245865 | SPAG4    | NM_139151_2_+1  |
| Agap3    | 3.884  | 3.666  | 4.272  | 4.184  | 3.830  | 3.724  | 4.136  | 3.982  | 4.450  | 4.270  | 213990 | AGAP3    | NM_139153_5_+1  |
| Rab40c   | 4.115  | 3.910  | 3.924  | 3.996  | 4.236  | 4.352  | 4.013  | 4.009  | 4.451  | 4.190  | 224624 | RAB40C   | NM_139154_17_-1 |
| Gbg1     | -1.321 | -3.315 | -3.604 | -4.387 | -2.801 | -4.499 | -2.790 | -0.381 | -1.438 | 0.485  | 227671 | GBG1     | NM_139197_2_+1  |
| Plac8    | 11.501 | 11.285 | 9.885  | 9.139  | 8.916  | 8.929  | 9.566  | 9.857  | 10.682 | 10.568 | 231507 | PLAC8    | NM_139198_5_-1  |
| Cytip    | 8.545  | 8.965  | 8.626  | 8.091  | 9.416  | 9.779  | 9.094  | 9.258  | 9.797  | 10.295 | 227929 | CYTIP    | NM_139200_2_-1  |
| Arap3    | -4.981 | -1.949 | -0.166 | 0.712  | -1.499 | -0.396 | 0.627  | 1.424  | 3.326  | 2.960  | 106952 | ARAP3    | NM_139206_18_-1 |
| Dppa3    | -4.981 | -4.981 | -4.947 | -4.947 | -4.624 | -4.853 | -1.746 | -4.914 | -2.335 | -4.981 | 73708  | NA       | NM_139218_6_+1  |
| Atxn7    | 4.485  | 4.632  | 4.470  | 4.336  | 4.414  | 4.510  | 4.573  | 4.381  | 4.774  | 5.119  | 246103 | ATXN7    | NM_139227_14_+1 |
| Rhbdl3   | -4.981 | -0.574 | -1.767 | -1.720 | -1.299 | -2.048 | -2.657 | -2.940 | -2.780 | -1.989 | 246104 | RHBDL3   | NM_139228_11_+1 |
| Cog8     | 5.451  | 5.551  | 5.123  | 5.343  | 5.397  | 5.494  | 5.361  | 5.413  | 5.525  | 5.363  | 97484  | COG8     | NM_139229_8_-1  |
| Fgd4     | -1.366 | -0.820 | -3.154 | -1.006 | -2.177 | -2.213 | -0.636 | -1.518 | 2.742  | 3.483  | 224014 | FGD4     | NM_139232_16_-1 |
| Nol6     | 3.247  | 3.223  | 4.000  | 3.893  | 4.015  | 3.809  | 3.647  | 3.835  | 4.809  | 4.206  | 230082 | NOL6     | NM_139236_4_-1  |
| Pla2g16  | 7.189  | 6.965  | 7.001  | 7.128  | 4.855  | 5.375  | 5.021  | 5.359  | 3.370  | 4.117  | 225845 | PLA2G16  | NM_139269_19_+1 |
| Galnt2   | 5.145  | 5.035  | 4.039  | 4.195  | 3.701  | 3.729  | 3.734  | 4.305  | 5.128  | 5.386  | 108148 | GALNT2   | NM_139272_8_+1  |
| Cdc26    | 6.432  | 6.431  | 5.833  | 5.799  | 5.724  | 5.719  | 5.784  | 5.713  | 4.969  | 5.057  | 66440  | CDC26    | NM_139291_4_-1  |
| Reep6    | -4.981 | -4.981 | -4.797 | -4.898 | -4.833 | -4.627 | -4.722 | -4.962 | -4.867 | -4.981 | 70335  | REEP6    | NM_139292_10_+1 |
| Braf     | 3.666  | 3.514  | 3.967  | 3.825  | 4.010  | 3.991  | 4.072  | 3.907  | 5.298  | 5.538  | 109880 | BRAF     | NM_139294_6_-1  |
| Mcf2     | 6.359  | 6.747  | 5.832  | 6.147  | 5.682  | 6.090  | 5.721  | 6.205  | 5.989  | 6.467  | 193813 | MCFD2    | NM_139295_17_-1 |
| Ugp2     | 0.969  | 1.440  | 2.390  | 2.741  | 1.900  | 2.014  | 1.979  | 2.270  | 2.239  | 3.745  | 216558 | UGP2     | NM_139297_11_-1 |
| Il31ra   | -1.987 | -3.267 | 0.679  | -0.307 | 2.944  | 2.455  | 2.578  | 1.858  | 1.818  | 1.707  | 218624 | IL31RA   | NM_139299_13_-1 |
| Myk      | -2.505 | -3.267 | -3.386 | -1.611 | -2.730 | -2.575 | -1.550 | -2.494 | -1.347 | -0.170 | 107589 | MYLK     | NM_139300_16_+1 |
| Sh3glb2  | 3.973  | 4.278  | 3.513  | 3.488  | 3.669  | 3.667  | 3.688  | 3.923  | 4.110  | 3.791  | 227700 | SH3GLB2  | NM_139302_2_-1  |
| Kif18a   | 1.675  | 1.862  | 1.894  | 2.068  | 2.473  | 2.143  | 2.274  | 1.887  | -0.043 | 0.205  | 228421 | KIF18A   | NM_139303_2_+1  |
| Gatad2b  | 2.381  | 2.192  | 2.485  | 2.246  | 2.526  | 2.347  | 1.929  | 1.504  | 1.692  | 1.423  | 229542 | GATAD2B  | NM_139304_3_+1  |

|               |        |        |        |        |        |        |        |        |        |        |        |               |                 |
|---------------|--------|--------|--------|--------|--------|--------|--------|--------|--------|--------|--------|---------------|-----------------|
| Car9          | 3.874  | 3.679  | 4.110  | 3.947  | 4.100  | 3.954  | 3.922  | 3.383  | 1.974  | 1.779  | 230099 | CA9           | NM_139305_4_+1  |
| Acer2         | -4.318 | -1.355 | -3.757 | -4.911 | -3.554 | -1.857 | -3.113 | -2.300 | -1.089 | 0.519  | 230379 | ACER2         | NM_139306_4_+1  |
| Vasn          | 0.652  | -0.076 | 0.214  | -0.059 | -0.300 | -0.814 | 0.414  | -0.438 | 0.475  | -0.335 | 246154 | VASN          | NM_139307_16_+1 |
| Stard7        | 5.360  | 5.186  | 6.341  | 6.518  | 7.494  | 7.336  | 7.092  | 6.735  | 6.001  | 6.039  | 99138  | STARD7        | NM_139308_2_+1  |
| Fktn          | 2.679  | 3.193  | 2.213  | 2.455  | 2.248  | 2.417  | 1.384  | 2.001  | 1.657  | 2.354  | 246179 | FKTN          | NM_139309_4_+1  |
| Mllt6         | 3.098  | 3.023  | 4.026  | 4.269  | 4.452  | 4.525  | 3.999  | 3.437  | 2.203  | 2.287  | 246198 | MLLT6         | NM_139311_11_+1 |
| Dph1          | 4.955  | 4.437  | 4.560  | 4.428  | 4.285  | 4.108  | 4.428  | 4.263  | 4.636  | 3.797  | 116905 | DPH1          | NM_144491_11_+1 |
| Osbpl2        | 5.581  | 5.424  | 4.910  | 4.945  | 4.732  | 4.887  | 4.843  | 5.132  | 5.719  | 5.883  | 228983 | OSBPL2        | NM_144500_2_+1  |
| Arl6ip4       | 6.872  | 6.680  | 5.896  | 5.850  | 6.122  | 5.948  | 5.853  | 5.794  | 5.325  | 4.878  | 65105  | ARL6IP4       | NM_144509_5_+1  |
| Slc6a13       | 1.780  | 0.881  | 3.663  | 3.998  | 5.475  | 5.718  | 4.442  | 2.922  | 0.856  | -1.791 | 14412  | SLC6A13       | NM_144512_6_+1  |
| Commd1        | 6.770  | 6.626  | 6.360  | 6.497  | 6.036  | 6.092  | 6.247  | 6.207  | 5.571  | 5.429  | 17846  | COMMD1        | NM_144514_11_+1 |
| Zfp52         | 4.221  | 4.013  | 4.097  | 3.804  | 4.894  | 4.960  | 5.110  | 4.689  | 4.496  | 4.933  | 22710  | NA            | NM_144515_17_+1 |
| Zmynd11       | 4.216  | 3.944  | 4.445  | 4.020  | 4.601  | 4.062  | 4.370  | 4.399  | 4.119  | 4.485  | 66505  | ZMYND11       | NM_144516_13_+1 |
| Tbc1d19       | 3.960  | 4.078  | 2.992  | 3.130  | 2.587  | 3.497  | 2.270  | 2.640  | 1.020  | 1.635  | 67249  | TBC1D19       | NM_144517_5_+1  |
| 2900011008Rik | -4.981 | -4.981 | -4.972 | -4.972 | -4.134 | -4.555 | -4.194 | -4.927 | -4.981 | -4.981 | 67254  | C16orf45      | NM_144518_16_+1 |
| Zfp639        | 3.598  | 3.303  | 3.078  | 3.089  | 2.929  | 3.156  | 3.889  | 3.612  | 3.437  | 3.477  | 67778  | ZNF639        | NM_144519_3_+1  |
| Sec14l2       | -3.668 | -1.951 | -3.042 | -0.392 | -3.181 | 0.007  | -2.438 | 0.957  | -2.065 | -1.215 | 67815  | SEC14L2       | NM_144520_11_+1 |
| Snap47        | 3.606  | 3.245  | 3.628  | 4.838  | 3.095  | 3.949  | 2.169  | 3.497  | 1.881  | 2.932  | 67826  | SNAP47        | NM_144521_11_+1 |
| Tbc1d10b      | 4.164  | 4.111  | 4.930  | 4.747  | 5.398  | 5.055  | 5.708  | 5.522  | 6.595  | 6.375  | 68449  | TBC1D10B      | NM_144522_7_+1  |
| Zfp622        | 5.791  | 5.812  | 5.782  | 5.907  | 5.987  | 6.010  | 6.008  | 5.891  | 5.647  | 5.710  | 52521  | ZNF622        | NM_144523_15_+1 |
| Angel1        | 2.584  | 2.383  | 1.780  | 2.184  | 1.319  | 1.834  | 0.737  | 1.203  | -0.636 | 1.707  | 68737  | ANGEL1        | NM_144524_12_+1 |
| Tmem214       | 6.159  | 5.822  | 5.699  | 5.739  | 4.752  | 4.802  | 5.043  | 5.339  | 5.407  | 5.408  | 68796  | TMEM214       | NM_144525_5_+1  |
| Fam64a        | -0.394 | -2.137 | 2.380  | 2.293  | 3.278  | 2.321  | 2.908  | 0.088  | 0.626  | -0.018 | 109212 | FAM64A        | NM_144526_11_+1 |
| Cep85         | 3.413  | 2.816  | 3.215  | 2.404  | 3.428  | 2.772  | 3.323  | 2.934  | 3.606  | 2.776  | 70012  | CEP85         | NM_144527_4_+1  |
| Rnf126        | 4.054  | 3.857  | 3.812  | 3.931  | 4.025  | 3.899  | 3.786  | 3.619  | 4.105  | 3.746  | 70294  | RNF126        | NM_144528_10_+1 |
| Arhgap17      | 3.060  | 3.569  | 2.829  | 2.160  | 1.547  | 1.408  | 2.638  | 2.758  | 4.403  | 4.679  | 70497  | ARHGAP17      | NM_144529_7_+1  |
| Zc3h11a       | 3.719  | 3.989  | 4.929  | 4.443  | 4.637  | 4.454  | 4.457  | 4.863  | 4.423  | 5.252  | 70579  | ZC3H11A       | NM_144530_1_+1  |
| Kazn          | -4.981 | -4.981 | -2.249 | -1.119 | -1.968 | -1.864 | -2.061 | -1.865 | -3.531 | -4.981 | 71529  | KAZN          | NM_144531_4_+1  |
| Cabp4         | -2.164 | -4.981 | 2.801  | 3.293  | 1.187  | 0.583  | 2.498  | 2.684  | -0.562 | 0.281  | 73660  | CABP4         | NM_144532_19_+1 |
| Nmnat3        | 3.270  | 2.580  | 3.450  | 3.558  | 2.351  | 1.973  | 2.790  | 3.035  | 2.956  | 2.182  | 74080  | NA            | NM_144533_9_+1  |
| Tmem38a       | 1.410  | 1.374  | 0.857  | 0.803  | 1.555  | 1.315  | 1.543  | 1.377  | 2.644  | 2.673  | 74166  | TMEM38A       | NM_144534_8_+1  |
| Ap5m1         | 4.690  | 5.075  | 4.665  | 4.625  | 4.474  | 4.409  | 4.536  | 4.656  | 4.838  | 5.208  | 74385  | AP5M1         | NM_144535_14_+1 |
| Cdkal1        | 4.599  | 4.925  | 4.379  | 4.402  | 4.865  | 4.949  | 4.581  | 4.373  | 4.154  | 3.870  | 68916  | CDKAL1        | NM_144536_13_+1 |
| Rab3il1       | 2.861  | 2.319  | 3.873  | 4.047  | 2.297  | 2.791  | 2.864  | 4.571  | 2.384  | 2.595  | 74760  | RAB3IL1       | NM_144538_19_+1 |
| Slamf7        | 6.013  | 5.614  | 9.145  | 7.973  | 8.959  | 8.243  | 8.579  | 7.019  | 4.435  | 1.118  | 75345  | SLAMF7        | NM_144539_1_+1  |
| Bre           | 5.113  | 5.028  | 4.684  | 4.787  | 4.758  | 4.563  | 5.023  | 4.922  | 5.557  | 5.023  | 107976 | BRE           | NM_144541_5_+1  |
| Thyn1         | 5.931  | 5.845  | 4.936  | 5.014  | 4.883  | 4.893  | 4.683  | 4.621  | 3.560  | 3.558  | 77862  | THYN1         | NM_144543_9_+1  |
| Eif3j1        | 5.131  | 4.834  | 5.036  | 4.745  | 4.923  | 4.544  | 5.142  | 4.666  | 4.639  | 4.374  | 78655  | EIF3J         | NM_144545_2_+1  |
| Zfp119a       | 4.000  | 2.721  | 3.706  | 3.050  | 3.519  | 3.008  | 3.415  | 2.814  | 3.026  | 3.478  | 104349 | NA            | NM_144546_17_+1 |
| Amhr2         | -4.981 | -4.981 | -4.956 | -4.956 | -4.555 | -4.019 | -3.326 | -4.825 | -1.932 | -4.981 | 110542 | AMHR2         | NM_144547_15_+1 |
| Il23r         | -1.884 | -4.981 | -3.577 | -0.884 | -2.472 | -1.563 | -4.955 | -3.551 | -4.981 | -4.981 | 209590 | IL23R         | NM_144548_6_+1  |
| Trib1         | 7.755  | 8.073  | 6.816  | 5.925  | 2.445  | 2.398  | 5.343  | 5.027  | 5.937  | 5.941  | 211770 | TRIB1         | NM_144549_15_+1 |
| Spice1        | 2.132  | 2.590  | 2.946  | 2.709  | 2.375  | 2.671  | 3.108  | 3.419  | 3.352  | 3.895  | 212514 | SPICE1        | NM_144550_16_+1 |
| Trib2         | -0.475 | -4.981 | -2.554 | 1.077  | -1.772 | 1.910  | -0.371 | 3.093  | -3.925 | 0.178  | 217410 | TRIB2         | NM_144551_12_+1 |
| Stxbp6        | -0.796 | -1.814 | 0.076  | 0.316  | -0.222 | -0.790 | 3.476  | 3.989  | 6.780  | 6.854  | 217517 | STXBP6        | NM_144552_12_+1 |
| Dlgap5        | 0.396  | 3.829  | 2.843  | 3.825  | 3.550  | 3.984  | 3.065  | 3.012  | 1.749  | 1.545  | 218977 | DLGAP5        | NM_144553_14_+1 |
| Lgi4          | -4.981 | -4.981 | -2.659 | -4.360 | -4.978 | -4.923 | -1.487 | -0.722 | -0.578 | -0.220 | 243914 | LG14          | NM_144556_7_+1  |
| Myrip         | -0.989 | -0.445 | -3.908 | -3.919 | -4.981 | -4.981 | -4.978 | -4.343 | -4.981 | -4.981 | 245049 | MYRIP         | NM_144557_9_+1  |
| Bivm          | 2.734  | 2.994  | 3.174  | 2.625  | 2.035  | 2.149  | 2.273  | 2.149  | 2.691  | 3.376  | 246229 | BIVM          | NM_144558_1_+1  |
| Fcgr4         | 2.386  | 0.821  | 3.235  | 2.414  | 4.240  | 4.512  | 6.754  | 6.041  | 5.441  | 3.834  | 246256 | FCGR3A FCGR3B | NM_144559_1_+1  |
| Gas2l1        | 0.010  | -0.611 | 1.984  | 2.160  | 0.380  | 0.319  | 0.461  | 1.322  | 2.963  | 3.981  | 78926  | GAS2L1        | NM_144560_11_+1 |
| Galn7         | 3.510  | 3.277  | 5.859  | 5.929  | 3.104  | 2.355  | 3.130  | 3.481  | 3.972  | 4.366  | 108150 | GALNT7        | NM_144731_8_+1  |
| Acat1         | 7.118  | 7.138  | 6.383  | 6.476  | 6.379  | 6.520  | 6.371  | 6.529  | 6.266  | 6.355  | 110446 | ACAT1         | NM_144784_9_+1  |
| Ggt7          | -1.316 | -4.981 | -0.997 | -4.445 | -2.730 | -3.526 | -3.604 | -2.573 | -4.981 | -4.981 | 207182 | GGT7          | NM_144786_2_+1  |
| Kdm4c         | 4.615  | 4.379  | 4.389  | 4.334  | 4.748  | 4.815  | 4.401  | 4.545  | 4.910  | 5.050  | 76804  | KDM4C         | NM_144787_4_+1  |
| Hectd1        | 5.888  | 5.947  | 6.421  | 6.305  | 6.379  | 6.402  | 6.093  | 6.083  | 6.198  | 6.338  | 207304 | HECTD1        | NM_144788_12_+1 |
| Prdm15        | 3.658  | 3.765  | 2.584  | 2.298  | 2.690  | 2.268  | 2.324  | 2.809  | 3.225  | 3.294  | 114604 | PRDM15        | NM_144789_16_+1 |
| Tor1aip1      | -2.249 | 1.063  | -1.407 | -2.552 | -3.910 | -3.194 | -4.678 | -1.608 | -0.390 | -1.668 | 208263 | TOR1AIP1      | NM_144791_1_+1  |
| Sgms1         | 4.570  | 4.726  | 3.408  | 2.840  | 0.124  | -2.256 | 2.752  | 2.487  | 3.567  | 3.085  | 208449 | SGMS1         | NM_144792_19_+1 |
| Slc25a38      | 4.866  | 4.716  | 6.219  | 6.224  | 5.133  | 5.231  | 5.341  | 5.347  | 5.534  | 5.075  | 208638 | SLC25A38      | NM_144793_9_+1  |
| Tmem63a       | 5.579  | 5.654  | 3.751  | 3.754  | 3.849  | 3.973  | 3.627  | 3.788  | 5.233  | 4.818  | 208795 | TMEM63A       | NM_144794_1_+1  |
| Pycr1         | -2.026 | -2.078 | -2.881 | -3.428 | -3.216 | -2.432 | -1.156 | 0.150  | -0.572 | -2.238 | 209027 | PYCR1         | NM_144795_11_+1 |
| Susd4         | -4.981 | -4.981 | -4.931 | -4.128 | -2.585 | -2.952 | -4.954 | -4.660 | -4.981 | -2.993 | 96935  | SUSD4         | NM_144796_1_+1  |
| Metnrl        | 1.858  | 1.316  | 5.788  | 5.641  | 5.776  | 5.507  | 7.522  | 8.020  | 9.138  | 9.041  | 210029 | METNRL        | NM_144797_11_+1 |
| Slc30a6       | 4.320  | 4.842  | 4.006  | 4.278  | 4.245  | 4.270  | 4.082  | 4.188  | 4.052  | 4.354  | 210148 | SLC30A6       | NM_144798_17_+1 |
| Lmcd1         | -3.189 | -2.160 | -4.797 | -2.027 | -4.508 | -2.400 | -4.979 | -2.013 | -4.190 | -3.498 | 30937  | LMCD1         | NM_144799_6_+1  |
| Mtss1         | 5.528  | 5.376  | 0.216  | 1.756  | -0.685 | 1.111  | 2.136  | 2.886  | 3.692  | 2.946  | 211401 | MTSS1         | NM_144800_15_+1 |
| Tmem143       | 1.169  | 1.573  | 1.231  | 0.789  | 1.664  | 1.665  | 1.516  | 0.609  | 1.558  | 1.237  | 70209  | TMEM143       | NM_144801_7_+1  |
| Hnnppl        | -0.340 | -1.578 | 5.596  | 5.706  | 5.314  | 5.211  | 5.198  | 5.284  | 5.699  | 6.061  | 72692  | HNNRPLL       | NM_144802_17_+1 |
| Chrna2        | -1.630 | -0.525 | -2.845 | -4.194 | -3.290 | -2.583 | -3.846 | -2.347 | -0.901 | -1.292 | 110902 | CHRNA2        | NM_144803_14_+1 |
| Depdc7        | -4.981 | 2.250  | 4.644  | 5.157  | 4.197  | 3.312  | 5.251  | 5.133  | 3.595  | 5.038  | 211896 | DEPDC7        | NM_144804_2_+1  |
| Tmem40        | -3.794 | -1.459 | -1.747 | -0.933 | -2.014 | -1.476 | -1.774 | -1.452 | 0.161  | -1.776 | 94346  | TMEM40        | NM_144805_6_+1  |
| Prpsap2       | 3.467  | 3.864  | 4.214  | 4.176  | 3.530  | 3.729  | 2.656  | 3.829  | 3.045  | 3.407  | 212627 | PRPSAP2       | NM_144806_11_+1 |
| Chpt1         | 1.524  | 2.470  | 2.772  | 2.723  | 1.328  | 0.951  | 2.091  | 2.163  | 3.011  | 3.718  | 212862 | CHPT1         | NM_144807_10_+1 |

|          |        |        |        |        |        |        |        |        |        |        |        |          |                  |
|----------|--------|--------|--------|--------|--------|--------|--------|--------|--------|--------|--------|----------|------------------|
| Slc39a14 | 2.965  | 3.104  | 0.581  | 0.159  | 0.655  | 0.866  | 0.644  | 1.419  | 0.995  | 2.007  | 213053 | SLC39A14 | NM_144808_14_-_1 |
| PRdm9    | 1.485  | 1.810  | 1.838  | 2.253  | 2.587  | 2.920  | 2.604  | 2.247  | 1.916  | 2.892  | 213389 | PRDM9    | NM_144809_17_-_1 |
| Klhdc8a  | -4.981 | -4.981 | -1.615 | -1.807 | -4.351 | -4.204 | -4.365 | -4.951 | -4.981 | -4.981 | 213417 | KLHDC8A  | NM_144810_1_+_1  |
| Cbx7     | 4.464  | 2.379  | 3.494  | 1.332  | 4.425  | 2.716  | 4.342  | 2.253  | 4.394  | 2.694  | 52609  | CBX7     | NM_144811_15_-_1 |
| Tnrc6b   | 5.510  | 5.358  | 5.093  | 4.696  | 5.923  | 5.842  | 5.539  | 5.137  | 4.432  | 4.459  | 213988 | TNRC6B   | NM_144812_15_+_1 |
| Slc24a1  | -4.981 | -4.981 | -1.309 | -3.523 | -3.229 | -2.871 | -2.568 | -3.776 | -1.949 | -3.236 | 214111 | SLC24A1  | NM_144813_9_-_1  |
| Rcor3    | 3.428  | 3.246  | 1.941  | 1.547  | 2.416  | 1.066  | 1.611  | 1.737  | 1.015  | 2.350  | 214742 | NA       | NM_144814_1_-_1  |
| Cecr5    | 3.689  | 4.088  | 3.813  | 3.966  | 3.649  | 4.234  | 3.835  | 4.190  | 4.719  | 4.911  | 214932 | CECR5    | NM_144815_6_-_1  |
| Rhbdl1   | -1.774 | -1.049 | -1.168 | -1.230 | -1.812 | -1.590 | -2.173 | -1.848 | -1.309 | 0.187  | 214951 | RHBDL1   | NM_144816_17_-_1 |
| Ncaph    | -1.629 | -2.997 | 2.823  | 2.629  | 3.752  | 2.931  | 3.146  | 2.060  | 1.517  | 1.390  | 215387 | NCAPH    | NM_144818_2_-_1  |
| Ccdc92   | -1.255 | -1.780 | -0.751 | 0.408  | -0.043 | 0.314  | -1.013 | 0.324  | -1.152 | -0.068 | 215707 | CCDC92   | NM_144819_5_-_1  |
| Ccdc28a  | 4.783  | 5.040  | 3.244  | 3.662  | 3.514  | 3.956  | 3.157  | 3.597  | 2.580  | 3.397  | 215814 | CCDC28A  | NM_144820_10_-_1 |
| Mfsd4b1  | -4.981 | -4.981 | -4.954 | -4.846 | -4.983 | -4.966 | -4.977 | -4.840 | -3.531 | -4.316 | 215929 | MFSD4B   | NM_144821_10_-_1 |
| Micu1    | 4.432  | 4.378  | 4.945  | 4.802  | 5.250  | 5.413  | 5.461  | 5.301  | 4.915  | 4.903  | 216001 | MICU1    | NM_144822_10_+_1 |
| Acsl6    | -4.981 | -4.981 | -4.987 | -4.607 | -4.954 | -4.854 | -4.918 | -4.512 | -4.981 | -4.626 | 216739 | ACSL6    | NM_144823_11_+_1 |
| Wrap53   | 3.803  | 3.693  | 3.150  | 3.104  | 3.691  | 3.587  | 3.539  | 3.383  | 3.570  | 3.474  | 216853 | WRAP53   | NM_144824_11_-_1 |
| Taok1    | 5.743  | 5.605  | 5.852  | 5.425  | 6.052  | 5.939  | 5.900  | 5.479  | 5.575  | 5.763  | 216965 | TAOK1    | NM_144825_11_-_1 |
| Utp6     | 4.913  | 4.882  | 5.103  | 5.184  | 5.206  | 5.263  | 4.855  | 5.252  | 4.731  | 4.963  | 216987 | UTP6     | NM_144826_11_-_1 |
| Ppp1r1b  | -2.948 | -4.981 | -4.968 | -4.427 | -3.771 | -4.195 | -4.980 | -4.358 | -4.981 | -4.981 | 19049  | PPP1R1B  | NM_144828_11_+_1 |
| Aarsd1   | 5.952  | 6.010  | 5.037  | 5.058  | 5.461  | 5.481  | 5.031  | 4.967  | 4.252  | 3.688  | 69684  | AARSD1   | NM_144829_11_-_1 |
| Tmem106a | 2.306  | 1.307  | 4.409  | 4.717  | 5.299  | 5.348  | 5.635  | 6.191  | 7.001  | 7.052  | 217203 | TMEM106A | NM_144830_11_+_1 |
| Dhx8     | 4.276  | 4.261  | 5.818  | 5.627  | 5.277  | 5.398  | 5.554  | 5.407  | 5.833  | 5.712  | 217207 | DXH8     | NM_144831_11_+_1 |
| BC017643 | 5.689  | 5.742  | 5.286  | 5.461  | 5.636  | 5.768  | 5.644  | 5.776  | 6.277  | 6.380  | 217370 | C17orf62 | NM_144832_11_-_1 |
| Zfp410   | 4.796  | 4.940  | 4.812  | 4.679  | 4.802  | 4.782  | 4.687  | 4.726  | 4.876  | 4.862  | 52708  | ZNF410   | NM_144833_12_+_1 |
| Heatr1   | 2.925  | 3.395  | 4.050  | 4.136  | 4.157  | 4.433  | 4.360  | 4.796  | 4.897  | 5.468  | 217995 | HEATR1   | NM_144835_13_+_1 |
| Ice1     | 3.730  | 4.069  | 4.415  | 4.388  | 4.615  | 4.725  | 4.490  | 4.460  | 4.743  | 5.001  | 218333 | ICE1     | NM_144837_13_-_1 |
| Sgtb     | -2.494 | -1.201 | -3.189 | -1.345 | -2.853 | -2.389 | -0.906 | -0.847 | -0.048 | 1.150  | 218544 | SGTB     | NM_144838_13_+_1 |
| Ube2e2   | 0.518  | 1.349  | 3.244  | 4.388  | 7.446  | 7.614  | 6.091  | 5.119  | 0.578  | 1.883  | 218793 | UBE2E2   | NM_144839_14_-_1 |
| Zmym5    | 2.254  | 3.561  | 3.414  | 3.205  | 2.253  | 1.611  | 2.615  | 2.311  | 2.495  | 1.896  | 219105 | ZMYM5    | NM_144842_14_-_1 |
| Mtmt6    | 4.883  | 4.624  | 5.827  | 5.719  | 6.215  | 6.077  | 6.287  | 6.366  | 7.555  | 7.846  | 219135 | MTMR6    | NM_144843_14_+_1 |
| Pcca     | 4.511  | 4.542  | 4.692  | 4.936  | 4.576  | 4.740  | 4.396  | 4.663  | 4.248  | 4.504  | 110821 | PCCA     | NM_144844_14_+_1 |
| Fam49b   | 7.351  | 7.562  | 8.514  | 8.635  | 9.116  | 8.993  | 9.079  | 9.023  | 9.431  | 9.598  | 223601 | FAM49B   | NM_144846_15_-_1 |
| Nrbp2    | -4.981 | -2.600 | -3.957 | -4.821 | -4.493 | -3.155 | -3.575 | -2.292 | -1.379 | -0.904 | 223649 | NA       | NM_144847_15_-_1 |
| Eppk1    | -4.981 | -4.981 | -4.977 | -4.102 | -4.962 | -4.404 | -4.932 | -3.270 | -4.981 | -4.981 | 223650 | EPPK1    | NM_144848_15_-_1 |
| Ankrd54  | 4.979  | 5.293  | 4.432  | 4.398  | 4.455  | 4.449  | 4.327  | 4.476  | 4.319  | 4.117  | 223690 | ANKRD54  | NM_144849_15_-_1 |
| Rapgef3  | -4.173 | -3.726 | -4.953 | -3.377 | -3.797 | -4.498 | -3.781 | -2.712 | -4.981 | -4.981 | 223864 | RAPGEF3  | NM_144850_15_-_1 |
| Senp1    | 4.281  | 4.628  | 4.652  | 4.638  | 5.133  | 4.876  | 4.879  | 4.847  | 5.034  | 5.215  | 223870 | SENP1    | NM_144851_15_-_1 |
| Slc7a4   | 2.122  | 3.136  | -0.603 | 1.034  | -3.826 | -0.571 | -0.614 | 1.259  | -1.447 | -0.283 | 224022 | SLC7A4   | NM_144852_16_-_1 |
| Rrp36    | 5.788  | 6.122  | 5.184  | 5.540  | 5.259  | 5.957  | 5.045  | 5.274  | 4.493  | 4.594  | 224823 | RRP36    | NM_144857_17_-_1 |
| Dus3l    | 5.170  | 5.043  | 5.172  | 5.120  | 5.466  | 5.556  | 5.229  | 5.214  | 5.330  | 5.138  | 224907 | DUS3L    | NM_144858_17_+_1 |
| Pja2     | 4.199  | 4.212  | 3.886  | 3.689  | 3.777  | 3.770  | 3.996  | 3.861  | 3.508  | 4.509  | 224938 | PJA2     | NM_144859_17_-_1 |
| Mib1     | 1.550  | 0.860  | 2.507  | 2.092  | 2.088  | 2.138  | 2.537  | 2.558  | 3.923  | 4.056  | 225164 | MIB1     | NM_144860_18_+_1 |
| Rprd1a   | 2.760  | 2.763  | 2.893  | 3.216  | 2.659  | 2.370  | 2.714  | 2.445  | 2.963  | 2.994  | 225283 | RPRD1A   | NM_144861_18_-_1 |
| Lims2    | -4.981 | -4.981 | -4.981 | -4.981 | -4.970 | -4.545 | -4.981 | -4.981 | -2.052 | -3.855 | 225341 | LIMS2    | NM_144862_18_+_1 |
| Wdr36    | -2.864 | -4.981 | -0.741 | -0.888 | -2.616 | -3.037 | -1.718 | -2.943 | -0.771 | -0.587 | 225348 | WDR36    | NM_144863_18_+_1 |
| Reep2    | -4.981 | -3.493 | -4.555 | -2.218 | -4.699 | -4.562 | -3.846 | -3.969 | -3.936 | -4.435 | 225362 | REEP2    | NM_144865_18_+_1 |
| Etf1     | 6.423  | 6.377  | 7.165  | 7.154  | 6.147  | 6.286  | 6.579  | 6.520  | 6.369  | 6.516  | 225363 | ETF1     | NM_144866_18_-_1 |
| Slmo1    | -1.668 | -4.981 | -1.041 | -0.602 | 1.086  | -0.016 | 0.231  | -0.396 | -0.348 | -0.121 | 225655 | PRELID3A | NM_144867_18_+_1 |
| Pcnx3    | 3.716  | 3.662  | 4.714  | 4.520  | 5.065  | 4.903  | 4.871  | 4.578  | 5.322  | 5.405  | 104401 | PCNX3    | NM_144868_19_-_1 |
| BC021614 | 1.782  | -0.562 | 1.273  | 1.497  | 1.219  | 1.536  | 2.562  | 2.445  | -0.008 | -0.531 | 225884 | NA       | NM_144869_19_-_1 |
| Ndufs8   | 6.252  | 5.925  | 4.689  | 4.468  | 3.939  | 3.486  | 3.732  | 3.565  | 3.100  | 3.026  | 225887 | NDUFS8   | NM_144870_19_-_1 |
| Kmt5b    | -3.839 | -2.341 | 0.312  | -1.555 | -2.095 | -0.460 | -1.265 | -1.007 | 0.796  | 0.752  | 225888 | KMT5B    | NM_144871_19_+_1 |
| Eml3     | 4.774  | 4.680  | 5.506  | 5.621  | 6.763  | 6.800  | 6.040  | 5.785  | 5.477  | 5.112  | 225898 | EML3     | NM_144872_19_+_1 |
| Uhrf2    | 4.927  | 5.042  | 5.098  | 5.018  | 5.245  | 5.374  | 5.295  | 5.275  | 5.143  | 5.555  | 109113 | UHRF2    | NM_144873_19_+_1 |
| Cox15    | 4.584  | 4.646  | 5.072  | 5.220  | 4.890  | 5.037  | 4.976  | 5.081  | 5.322  | 5.378  | 226139 | COX15    | NM_144874_19_-_1 |
| Rab29    | 6.114  | 5.856  | 5.337  | 5.240  | 5.563  | 5.764  | 5.864  | 5.713  | 5.945  | 5.822  | 226422 | RAB29    | NM_144875_1_+_1  |
| Mettl13  | 2.098  | 1.783  | 2.807  | 2.680  | 2.314  | 1.766  | 2.497  | 2.858  | 3.527  | 3.139  | 71449  | METTL13  | NM_144877_1_-_1  |
| Vash2    | -4.590 | -3.407 | -4.839 | -4.757 | -4.764 | -4.951 | -4.674 | -4.896 | -4.736 | -4.502 | 226841 | VASH2    | NM_144879_1_-_1  |
| Ppp2r5a  | 6.101  | 6.407  | 6.861  | 6.757  | 6.376  | 6.436  | 7.136  | 7.392  | 9.033  | 9.152  | 226849 | PPP2R5A  | NM_144880_1_-_1  |
| Hhat     | 2.717  | 2.593  | 1.113  | 1.530  | 0.253  | 0.560  | 0.453  | 0.652  | -0.636 | 0.106  | 226861 | HHAT     | NM_144881_1_-_1  |
| Spats2l  | -4.354 | -4.981 | -4.946 | -4.946 | -4.333 | -4.885 | -4.934 | -4.968 | -4.981 | -4.981 | 67198  | SPATS2L  | NM_144882_1_+_1  |
| Proser2  | -3.368 | -2.959 | 4.295  | 4.424  | -1.906 | -1.486 | 1.393  | 0.347  | -3.183 | -2.498 | 227545 | PROSER2  | NM_144883_2_-_1  |
| Tor1a    | 6.451  | 6.457  | 7.401  | 7.499  | 6.529  | 6.524  | 6.762  | 6.796  | 7.272  | 6.948  | 30931  | TOR1A    | NM_144884_2_-_1  |
| BC005624 | 6.764  | 6.745  | 5.950  | 5.997  | 6.341  | 6.355  | 6.262  | 6.127  | 5.912  | 5.824  | 227707 | C9orf78  | NM_144885_2_-_1  |
| Exosc2   | 4.469  | 4.725  | 4.602  | 4.576  | 4.661  | 4.494  | 4.598  | 4.636  | 3.738  | 3.346  | 227715 | EXOSC2   | NM_144886_2_+_1  |
| Zdhc5    | 4.505  | 4.399  | 4.548  | 4.634  | 4.896  | 4.625  | 5.001  | 5.226  | 5.991  | 6.195  | 228136 | ZDHHC5   | NM_144887_2_-_1  |
| Mavs     | 0.933  | 1.632  | 0.759  | 0.190  | -0.027 | -0.226 | 0.495  | 0.855  | 2.257  | 2.388  | 228607 | MAVS     | NM_144888_2_+_1  |
| Gdap1l1  | -4.981 | -4.981 | -3.223 | -5.002 | -3.236 | -2.945 | -4.818 | -4.851 | -4.190 | -4.981 | 228858 | GDAP1L1  | NM_144891_2_+_1  |
| Ncoa5    | 4.143  | 4.387  | 4.702  | 4.621  | 5.059  | 5.304  | 4.822  | 4.910  | 4.712  | 5.180  | 228869 | NCOA5    | NM_144892_2_-_1  |
| Slc35c2  | 7.221  | 7.198  | 7.220  | 7.414  | 7.099  | 7.302  | 6.935  | 7.001  | 6.560  | 6.559  | 228875 | SLC35C2  | NM_144893_2_-_1  |
| Zgpat    | 0.818  | 1.660  | 1.855  | 1.930  | 1.728  | 1.319  | 1.857  | 1.881  | 2.027  | 1.656  | 229007 | ZGPAT    | NM_144894_2_+_1  |
| Spg20    | 3.735  | 3.733  | 2.577  | 3.267  | 2.640  | 2.365  | 1.489  | 2.566  | 2.685  | 3.381  | 229285 | NA       | NM_144895_3_+_1  |
| Gatb     | 3.718  | 3.958  | 3.742  | 4.236  | 3.559  | 3.663  | 3.222  | 3.725  | 2.848  | 2.840  | 229487 | GATB     | NM_144896_3_+_1  |
| Apoa1bp  | 7.210  | 6.921  | 6.253  | 6.647  | 6.176  | 6.470  | 5.973  | 5.802  | 4.970  | 4.822  | 246703 | NAXE     | NM_144897_3_-_1  |

|               |        |        |        |        |        |        |        |        |        |        |        |          |                 |
|---------------|--------|--------|--------|--------|--------|--------|--------|--------|--------|--------|--------|----------|-----------------|
| Msto1         | 4.490  | 4.710  | 4.220  | 4.666  | 4.076  | 4.421  | 3.887  | 4.244  | 3.757  | 3.867  | 229524 | MSTO1    | NM_144898_3_-1  |
| Adamtsl4      | 0.529  | 1.133  | -0.437 | 0.322  | -0.793 | -0.285 | 0.240  | -0.473 | 1.772  | 2.513  | 229595 | ADAMTSL4 | NM_144899_3_-1  |
| Atp1a1        | 6.916  | 6.165  | 6.597  | 6.676  | 5.934  | 6.642  | 6.736  | 6.813  | 7.390  | 7.511  | 11928  | ATP1A1   | NM_144900_3_-1  |
| Csde1         | 5.186  | 5.317  | 5.678  | 5.883  | 5.188  | 5.651  | 5.178  | 5.529  | 5.590  | 5.744  | 229663 | CSDE1    | NM_144901_3_+1  |
| Slc35a3       | 3.934  | 4.411  | 5.037  | 5.016  | 4.372  | 4.575  | 4.591  | 4.554  | 5.113  | 5.334  | 229782 | SLC35A3  | NM_144902_3_-1  |
| Aldob         | -4.981 | -4.981 | -4.970 | -4.970 | -4.981 | -4.981 | -4.786 | -4.905 | -4.981 | -4.981 | 230163 | ALDOB    | NM_144903_4_-1  |
| Ptbp3         | 4.315  | 3.023  | 4.884  | 4.291  | 4.482  | 4.286  | 4.563  | 4.379  | 4.773  | 5.069  | 230257 | PTBP3    | NM_144904_4_-1  |
| Tmem268       | 5.448  | 5.807  | 4.868  | 4.886  | 5.908  | 5.925  | 5.924  | 5.772  | 6.380  | 6.457  | 230279 | TMEM268  | NM_144905_4_+1  |
| Sgip1         | -3.169 | -4.633 | -4.420 | -3.855 | -3.922 | -3.475 | -2.598 | -2.455 | -4.981 | -4.970 | 73094  | SGIP1    | NM_144906_4_+1  |
| Sesn2         | 5.329  | 5.427  | 4.318  | 4.073  | 5.939  | 5.898  | 4.410  | 3.768  | 3.910  | 3.766  | 230784 | SESN2    | NM_144907_4_-1  |
| Galnt11       | 5.177  | 5.608  | 5.051  | 5.870  | 5.185  | 5.801  | 4.801  | 5.524  | 5.185  | 5.875  | 231050 | GALNT11  | NM_144908_5_+1  |
| Gckr          | -4.981 | -4.981 | -3.664 | -4.823 | -4.981 | -4.981 | -4.981 | -4.981 | -4.981 | -4.981 | 231103 | GCKR     | NM_144909_5_+1  |
| Cnot6l        | 4.019  | 1.797  | 2.479  | 2.569  | 4.288  | 3.553  | 3.914  | 3.215  | 4.057  | 4.510  | 231464 | CNOT6L   | NM_144910_5_-1  |
| Rpap2         | 3.493  | 3.077  | 3.196  | 2.997  | 2.825  | 2.516  | 2.674  | 2.425  | 2.694  | 1.987  | 231571 | RPAP2    | NM_144911_5_+1  |
| Rad9b         | 2.087  | 2.040  | 0.966  | 1.280  | 0.566  | 1.544  | 1.044  | 0.601  | -0.746 | -0.445 | 231724 | RAD9B    | NM_144912_5_-1  |
| Mepce         | 4.800  | 4.845  | 3.856  | 3.808  | 4.276  | 4.574  | 4.204  | 4.263  | 3.880  | 3.810  | 231803 | MEPCE    | NM_144913_5_-1  |
| Daglb         | 0.409  | -1.124 | 4.839  | 5.352  | 5.407  | 6.096  | 6.197  | 6.448  | 7.321  | 7.275  | 231871 | DAGLB    | NM_144915_5_+1  |
| Tmem150a      | 4.395  | 3.926  | 0.328  | 0.394  | -0.543 | -0.235 | 0.344  | 0.542  | -0.638 | 0.049  | 232086 | TMEM150A | NM_144916_6_+1  |
| Elmod3        | 2.094  | 1.085  | -0.520 | -2.978 | 0.749  | -1.898 | 1.383  | 0.981  | 2.117  | 1.320  | 232089 | ELMOD3   | NM_144917_6_-1  |
| Smyd5         | 3.532  | 3.577  | 4.916  | 4.850  | 4.178  | 4.268  | 4.105  | 4.429  | 3.840  | 3.783  | 232187 | SMYD5    | NM_144918_6_+1  |
| Hdac11        | 1.611  | 0.996  | 1.796  | 2.185  | 0.784  | 0.703  | -0.429 | -1.458 | -2.265 | -1.886 | 232232 | HDAC11   | NM_144919_6_+1  |
| Plekha5       | 2.038  | 2.574  | 5.874  | 5.836  | 3.254  | 3.755  | 2.953  | 3.610  | 0.159  | 1.252  | 109135 | PLEKHA5  | NM_144920_6_+1  |
| Hnrrnpul1     | 4.949  | 4.722  | 4.896  | 5.117  | 5.684  | 5.332  | 5.376  | 5.321  | 6.382  | 6.162  | 232989 | HNRNPUL1 | NM_144922_7_-1  |
| Blvrbl        | 6.696  | 6.575  | 3.631  | 5.289  | 4.858  | 6.085  | 5.401  | 6.566  | 4.921  | 4.774  | 233016 | BLVRB    | NM_144923_7_+1  |
| Tnrc6a        | 5.259  | 5.102  | 6.048  | 5.763  | 6.124  | 6.348  | 6.066  | 5.689  | 5.320  | 5.059  | 233833 | TNRC6A   | NM_144925_7_+1  |
| Sez6l2        | -4.111 | -3.741 | -3.173 | -4.834 | -4.704 | -3.597 | -4.919 | -4.930 | -4.328 | -4.722 | 233878 | SEZ6L2   | NM_144926_7_+1  |
| Tti2          | 2.945  | 0.208  | 2.964  | 1.844  | 2.924  | 1.678  | 2.337  | 1.779  | 3.090  | 2.605  | 234138 | TTI2     | NM_144927_8_+1  |
| Nae1          | 5.456  | 5.626  | 5.451  | 5.522  | 5.582  | 5.632  | 5.461  | 5.482  | 4.802  | 5.293  | 234664 | NAE1     | NM_144931_8_-1  |
| Acsf3         | 1.813  | 1.461  | 2.745  | 2.725  | 2.712  | 2.372  | 2.784  | 1.872  | 2.663  | 2.861  | 257633 | ACSF3    | NM_144932_8_+1  |
| Med17         | 5.570  | 5.751  | 5.299  | 5.323  | 5.146  | 5.324  | 5.027  | 5.069  | 5.101  | 5.210  | 234959 | MED17    | NM_144933_9_-1  |
| Plppr2        | -3.741 | -4.981 | -2.916 | -3.488 | -2.641 | -4.086 | -3.003 | -3.473 | -0.773 | -2.015 | 235044 | PLPPR2   | NM_144935_9_+1  |
| Tmem45b       | -4.981 | -0.906 | -2.797 | -2.885 | -2.314 | -0.413 | -3.542 | -3.729 | -2.038 | -4.164 | 235135 | TMEM45B  | NM_144936_9_-1  |
| Usp3          | 5.669  | 5.620  | 5.587  | 5.508  | 5.670  | 5.682  | 5.849  | 5.568  | 6.356  | 6.163  | 235441 | USP3     | NM_144937_9_-1  |
| C1s1          | -4.981 | -3.131 | -4.610 | -4.998 | -4.980 | -4.919 | -4.770 | -4.965 | -4.981 | -4.981 | 50908  | C1S      | NM_144938_6_-1  |
| Frs3          | -0.437 | 0.452  | 0.082  | 0.098  | 1.026  | 0.742  | 0.436  | -0.183 | -1.563 | -0.479 | 107971 | FRS3     | NM_144939_17_+1 |
| Map7d1        | 3.513  | 3.368  | 3.011  | 2.863  | 4.072  | 2.976  | 4.282  | 3.603  | 5.674  | 5.691  | 245877 | MAP7D1   | NM_144941_4_-1  |
| Csad          | 3.173  | 3.230  | 3.863  | 4.182  | 2.994  | 2.861  | 3.965  | 4.012  | 3.629  | 3.584  | 246277 | CSAD     | NM_144942_15_-1 |
| Cd207         | -0.175 | -1.330 | 7.093  | 9.559  | -2.012 | -0.019 | 0.064  | 2.645  | -4.981 | -1.878 | 246278 | CD207    | NM_144943_6_-1  |
| Rbm7          | 6.407  | 6.011  | 6.210  | 6.664  | 5.614  | 5.646  | 6.087  | 6.561  | 6.376  | 7.514  | 67010  | RBM7     | NM_144948_9_-1  |
| 1700019D03Rik | -2.362 | -1.736 | -2.593 | -0.663 | 2.004  | 2.083  | 0.359  | -0.207 | -2.250 | -3.481 | 67080  | C2orf88  | NM_144953_1_-1  |
| Ppil2         | -0.877 | -2.683 | 1.370  | 0.677  | 0.968  | 0.620  | -0.192 | -0.043 | 0.387  | -0.754 | 66053  | PPIL2    | NM_144954_16_-1 |
| Eif4a1        | 8.557  | 8.703  | 9.254  | 9.506  | 9.011  | 9.134  | 8.900  | 9.020  | 8.696  | 8.554  | 13681  | EIF4A1   | NM_144958_11_-1 |
| Fcamr         | -3.090 | -2.883 | -4.728 | -1.008 | -4.938 | -2.777 | -4.697 | -3.206 | -4.981 | -4.981 | 64435  | FCAMR    | NM_144960_1_+1  |
| Gpr85         | 2.419  | 1.710  | 0.254  | -0.041 | -1.932 | -3.353 | -2.469 | -2.881 | -1.109 | -0.072 | 64450  | GPR85    | NM_145066_6_-1  |
| Gucy2c        | 0.674  | -1.778 | 0.596  | -0.838 | 1.350  | -1.940 | 1.652  | -0.964 | 0.827  | -1.528 | 14917  | GUCY2C   | NM_145067_6_-1  |
| Hip1r         | 4.446  | 3.541  | 4.754  | 4.346  | 4.373  | 4.173  | 4.260  | 3.832  | 2.592  | 1.560  | 29816  | HIP1R    | NM_145070_5_+1  |
| Hist1h3g      | -4.981 | -4.981 | -1.257 | -2.823 | -0.975 | -2.548 | -2.323 | -3.245 | -2.267 | -4.981 | 97908  | HIST1H3J | NM_145073_13_+1 |
| Trim24        | -1.590 | -3.432 | -2.264 | -1.704 | -0.148 | -1.217 | -2.114 | -2.435 | -0.138 | 0.176  | 21848  | TRIM24   | NM_145076_6_+1  |
| Zfp979        | -1.340 | 5.705  | -4.701 | 3.499  | -4.841 | 4.710  | -3.538 | 4.628  | -3.738 | 5.889  | 112422 | ZNF616   | NM_145078_4_-1  |
| Ugt1a6a       | -3.197 | -4.981 | -2.956 | -0.608 | -3.268 | -2.099 | -3.143 | -0.546 | 1.040  | 2.304  | 94284  | UGT1A6   | NM_145079_1_+1  |
| Lypd1         | -4.981 | -4.981 | -4.981 | -4.981 | -4.838 | 5.209  | -4.951 | -0.074 | -4.981 | -4.981 | 72585  | LYPD1    | NM_145100_1_-1  |
| Cacnb1        | -0.531 | -0.460 | 0.223  | -0.134 | -1.104 | -1.455 | -1.371 | -1.993 | -1.803 | 0.162  | 12295  | CACNB1   | NM_145121_11_-1 |
| Pex16         | 5.674  | 5.554  | 4.165  | 4.557  | 5.959  | 6.003  | 5.431  | 4.899  | 3.845  | 4.017  | 18633  | PEX16    | NM_145122_2_+1  |
| Mib2          | 1.344  | 2.468  | 2.346  | 1.589  | 1.714  | 1.632  | 2.901  | 1.859  | 3.211  | 3.068  | 76580  | MIB2     | NM_145124_4_-1  |
| Brwd1         | 2.626  | 3.289  | 3.229  | 2.665  | 3.042  | 3.248  | 2.609  | 2.906  | 1.593  | 2.685  | 93871  | BRWD1    | NM_145125_16_-1 |
| Chil4         | -4.981 | -4.981 | -4.958 | -4.958 | -4.981 | -4.981 | -4.981 | -4.981 | -0.267 | -0.266 | 104183 | NA       | NM_145126_3_-1  |
| Mgat5         | 1.992  | 1.638  | 2.064  | 1.510  | 2.798  | 2.622  | 1.766  | 2.708  | 2.472  | 2.644  | 107895 | MGAT5    | NM_145128_1_+1  |
| Lpcat3        | 5.283  | 5.427  | 5.180  | 5.502  | 4.915  | 5.375  | 5.300  | 5.938  | 5.539  | 5.694  | 14792  | LPCAT3   | NM_145130_6_+1  |
| Pitrm1        | 4.728  | 5.103  | 4.443  | 4.911  | 4.458  | 4.770  | 4.523  | 4.945  | 4.379  | 4.612  | 69617  | PITRM1   | NM_145131_13_+1 |
| Tifa          | 7.646  | 7.756  | 6.386  | 6.250  | 5.894  | 5.981  | 6.374  | 6.477  | 7.247  | 7.173  | 211550 | TIFA     | NM_145133_3_+1  |
| Spsb4         | -4.981 | -2.437 | -4.981 | -4.981 | -4.698 | -4.454 | -4.918 | -3.795 | 1.368  | 1.547  | 211949 | SPSB4    | NM_145134_9_-1  |
| Rnh1          | 5.638  | 5.704  | 5.199  | 5.535  | 3.716  | 3.553  | 4.459  | 4.493  | 5.217  | 5.316  | 107702 | RNH1     | NM_145135_7_-1  |
| Mgl2          | 5.069  | 5.740  | -1.102 | -0.033 | -0.832 | 1.976  | 4.776  | 6.348  | 0.346  | 0.812  | 216864 | CLEC10A  | NM_145137_11_+1 |
| Nek9          | 4.940  | 4.821  | 5.619  | 5.422  | 5.373  | 5.446  | 5.384  | 5.412  | 5.903  | 5.791  | 217718 | NEK9     | NM_145138_12_-1 |
| Eif3l         | 6.832  | 6.827  | 7.187  | 7.348  | 7.014  | 6.883  | 6.900  | 7.107  | 6.757  | 6.784  | 223691 | EIF3L    | NM_145139_15_+1 |
| Abcc10        | -4.981 | -4.868 | -2.785 | -3.275 | -4.981 | -4.981 | -4.977 | -4.071 | -4.869 | -4.963 | 224814 | ABCC10   | NM_145140_17_-1 |
| Fcrla         | 8.004  | 7.535  | 4.620  | 2.023  | -0.865 | 1.395  | 0.334  | 2.939  | -3.091 | -1.072 | 98752  | FCRLA    | NM_145141_1_-1  |
| Chst10        | 0.594  | 1.967  | 0.417  | 2.780  | 3.895  | 6.015  | 2.095  | 3.959  | -2.780 | 1.095  | 98388  | CHST10   | NM_145142_1_-1  |
| Mpp4          | -4.981 | -4.981 | -4.723 | -4.776 | -4.893 | -4.802 | -4.861 | -4.957 | -4.981 | -4.422 | 227157 | MPP4     | NM_145143_1_-1  |
| Aif1l         | -4.981 | -4.981 | -2.577 | -1.304 | -1.171 | 2.300  | -2.180 | -0.530 | -3.242 | -4.981 | 108897 | AIF1L    | NM_145144_2_+1  |
| Pomt1         | 2.346  | 2.461  | 2.200  | 2.850  | 1.932  | 2.625  | 2.590  | 2.923  | 3.095  | 3.440  | 99011  | POMT1    | NM_145145_2_+1  |
| Gtpbp6        | 4.129  | 3.866  | 3.740  | 3.723  | 3.907  | 3.913  | 3.783  | 3.797  | 3.637  | 3.584  | 107999 | GTPBP6   | NM_145147_5_-1  |
| Frm4b         | 3.787  | 3.237  | 5.567  | 4.455  | 3.432  | 0.627  | 4.729  | 3.813  | 3.767  | 4.075  | 232288 | FRMD4B   | NM_145148_6_-1  |
| Rasgrp4       | 2.203  | 2.124  | 4.819  | 4.702  | 4.943  | 4.397  | 4.732  | 4.748  | 5.801  | 5.289  | 233046 | RASGRP4  | NM_145149_7_+1  |

|          |        |        |        |        |        |        |        |        |        |        |        |          |                 |
|----------|--------|--------|--------|--------|--------|--------|--------|--------|--------|--------|--------|----------|-----------------|
| Prc1     | -1.816 | 2.073  | 2.151  | 2.229  | 3.387  | 3.037  | 2.760  | 2.533  | 1.804  | 1.413  | 233406 | PRC1     | NM_145150_7_+1  |
| Crebzf   | 3.955  | 4.248  | 5.208  | 4.983  | 4.543  | 4.300  | 4.827  | 4.866  | 4.924  | 5.412  | 233490 | CREBZF   | NM_145151_7_+1  |
| Lrrc3    | -2.178 | -0.277 | 4.048  | 4.206  | 0.238  | 0.415  | -1.291 | 0.472  | -2.833 | -4.148 | 237387 | LRRC3    | NM_145152_10_-1 |
| Angptl6  | 2.788  | 2.985  | -0.384 | 0.226  | -0.134 | 0.248  | -0.205 | 0.204  | -0.035 | 0.234  | 70726  | ANGPTL6  | NM_145154_9_-1  |
| Slc25a28 | 4.788  | 4.680  | 3.687  | 3.598  | 3.739  | 4.077  | 4.145  | 4.135  | 4.853  | 4.663  | 246696 | SLC25A28 | NM_145156_19_-1 |
| Emilin2  | -1.818 | -1.084 | -1.382 | 1.913  | 1.289  | 2.119  | 6.410  | 7.152  | 10.134 | 10.196 | 246707 | EMILIN2  | NM_145158_17_-1 |
| Oasl1    | 3.776  | 2.407  | 3.305  | 2.907  | 2.798  | 1.639  | 3.387  | 2.428  | 4.460  | 2.991  | 231655 | OASL     | NM_145209_5_+1  |
| Oas1a    | 3.735  | 1.305  | 3.337  | 1.035  | 6.809  | 5.384  | 6.973  | 5.561  | 7.533  | 6.127  | 246730 | OAS1     | NM_145211_5_-1  |
| Abhd11   | 2.306  | 2.375  | 2.340  | 2.333  | 2.177  | 2.405  | 2.297  | 3.011  | 3.144  | 2.823  | 68758  | ABHD11   | NM_145215_5_+1  |
| Rasl10a  | -2.948 | -2.365 | -2.992 | -3.796 | -3.601 | -3.174 | -4.620 | -3.660 | -3.491 | -2.749 | 75668  | RASL10A  | NM_145216_11_+1 |
| Appl2    | 3.839  | 3.646  | 4.084  | 4.119  | 4.733  | 4.362  | 3.973  | 4.089  | 4.782  | 4.698  | 216190 | APPL2    | NM_145220_10_-1 |
| Appl1    | 5.467  | 5.631  | 5.787  | 5.753  | 5.531  | 5.659  | 5.329  | 5.193  | 4.863  | 5.216  | 72993  | APPL1    | NM_145221_14_-1 |
| B3gnt7   | -2.126 | -1.231 | -4.448 | -3.649 | -4.710 | -3.505 | -2.126 | -0.761 | -4.981 | -3.435 | 227327 | B3GNT7   | NM_145222_1_+1  |
| Alms1    | 0.012  | 0.706  | 4.402  | 4.183  | 2.045  | 1.502  | 1.882  | 1.828  | 0.685  | 1.058  | 236266 | ALMS1    | NM_145223_6_+1  |
| Oas3     | -1.642 | -1.270 | 0.106  | -1.051 | 2.613  | 0.876  | 4.158  | 2.974  | 6.551  | 4.599  | 246727 | OAS3     | NM_145226_5_-1  |
| Oas2     | -1.217 | -2.997 | -0.311 | -2.948 | 5.222  | 3.632  | 4.760  | 3.580  | 6.255  | 4.797  | 246728 | OAS2     | NM_145227_5_-1  |
| AY074887 | -1.389 | -1.594 | -0.782 | -1.932 | -1.286 | -1.848 | -1.154 | -1.839 | -0.994 | -1.305 | 246735 | NA       | NM_145229_9_-1  |
| Yipf3    | 6.877  | 7.026  | 6.221  | 6.318  | 5.981  | 6.020  | 6.177  | 6.347  | 6.645  | 6.600  | 28064  | YIPF3    | NM_145353_17_+1 |
| Nsun2    | 6.155  | 5.886  | 6.993  | 6.782  | 6.389  | 6.393  | 6.261  | 6.535  | 6.477  | 6.115  | 28114  | NSUN2    | NM_145354_13_+1 |
| Rnf185   | 1.365  | -3.782 | -3.073 | -4.387 | -3.401 | -0.229 | -1.244 | -2.369 | 0.667  | -1.292 | 193670 | RNF185   | NM_145355_11_-1 |
| Zbtb7c   | -4.981 | -4.981 | -4.793 | -4.320 | -4.866 | -4.602 | -4.976 | -4.768 | -4.981 | -4.981 | 207259 | ZBTB7C   | NM_145356_18_+1 |
| Camkk2   | 2.166  | 2.891  | 2.301  | 2.115  | 2.154  | 1.454  | 4.399  | 4.570  | 7.247  | 6.752  | 207565 | CAMKK2   | NM_145358_5_-1  |
| Ubald1   | 5.671  | 5.696  | 4.775  | 4.730  | 5.063  | 4.897  | 4.904  | 4.887  | 4.653  | 4.727  | 207740 | UBALD1   | NM_145359_16_-1 |
| Idi1     | 7.002  | 7.225  | 5.729  | 4.723  | 5.023  | 4.692  | 5.294  | 5.724  | 4.996  | 6.155  | 319554 | IDI1     | NM_145360_13_+1 |
| Btbd2    | 3.530  | 3.166  | 3.380  | 3.167  | 3.643  | 3.464  | 3.734  | 3.385  | 4.032  | 3.585  | 208198 | BTBD2    | NM_145361_10_-1 |
| Alg1     | 5.438  | 4.693  | 4.488  | 4.058  | 4.742  | 4.005  | 4.669  | 4.033  | 5.221  | 4.311  | 208211 | ALG1     | NM_145362_16_+1 |
| Akr1d1   | -4.981 | -4.981 | -4.476 | -4.583 | -4.980 | -4.792 | -4.524 | -4.758 | -4.981 | -4.981 | 208665 | AKR1D1   | NM_145364_6_+1  |
| Creb3l3  | -2.483 | -4.981 | -4.986 | -3.970 | 0.971  | 1.058  | 0.689  | 0.120  | 0.319  | -0.487 | 208677 | CREB3L3  | NM_145365_10_-1 |
| Txndc5   | 8.507  | 8.359  | 7.169  | 7.183  | 5.640  | 5.903  | 6.548  | 8.221  | 7.462  | 7.440  | 105245 | TXNDC5   | NM_145367_13_-1 |
| Gps1     | 1.546  | 2.027  | 2.550  | 3.038  | 1.575  | 1.930  | 1.461  | 2.625  | 1.884  | 2.019  | 209318 | GPS1     | NM_145370_11_+1 |
| Eif2b1   | 5.399  | 5.720  | 5.466  | 5.626  | 5.326  | 5.389  | 5.298  | 5.394  | 5.223  | 5.122  | 209354 | EIF2B1   | NM_145371_5_-1  |
| Sectm1a  | -4.981 | -4.981 | -4.954 | -4.252 | -1.844 | -2.571 | -1.007 | -1.332 | -0.019 | -1.686 | 209588 | SECTM1   | NM_145373_11_-1 |
| Mios     | 3.921  | 3.954  | 3.791  | 3.852  | 3.758  | 3.782  | 3.870  | 3.952  | 4.244  | 4.422  | 252875 | MIOS     | NM_145374_6_+1  |
| Tm6sf1   | 2.097  | 1.751  | 5.563  | 5.625  | 5.207  | 5.279  | 6.072  | 6.585  | 7.650  | 7.752  | 107769 | TM6SF1   | NM_145375_7_+1  |
| Lpcat1   | 1.190  | 2.062  | 4.753  | 5.112  | 4.452  | 4.255  | 4.202  | 4.789  | 4.187  | 5.219  | 210992 | LPCAT1   | NM_145376_13_+1 |
| Trim41   | 3.258  | 3.424  | 3.933  | 4.044  | 3.160  | 3.435  | 3.343  | 3.041  | 2.844  | 2.910  | 211007 | TRIM41   | NM_145377_11_-1 |
| Pla2g4b  | -1.455 | 0.367  | -1.485 | -3.752 | -4.857 | -3.612 | -2.140 | -1.165 | -1.332 | -4.962 | 211429 | PLA2G4B  | NM_145378_2_+1  |
| Eif3m    | 7.672  | 7.647  | 7.640  | 7.591  | 7.448  | 7.295  | 7.382  | 7.347  | 6.762  | 6.676  | 98221  | EIF3M    | NM_145380_2_-1  |
| Lactb2   | 4.822  | 4.799  | 3.131  | 2.980  | 3.220  | 3.469  | 3.237  | 3.497  | 3.780  | 4.053  | 212442 | LACTB2   | NM_145381_1_-1  |
| Fam193b  | 4.367  | 4.431  | 4.006  | 3.717  | 4.186  | 4.343  | 4.413  | 4.550  | 4.491  | 4.590  | 212483 | NA       | NM_145382_13_-1 |
| Pqlc2    | 5.258  | 5.248  | 6.612  | 6.631  | 5.032  | 5.002  | 4.956  | 5.251  | 4.506  | 4.588  | 212555 | PQLC2    | NM_145384_4_-1  |
| Mlf2     | 2.935  | 2.750  | 2.962  | 3.167  | 2.515  | 2.665  | 2.200  | 2.318  | 2.156  | 2.350  | 30853  | MLF2     | NM_145385_6_+1  |
| Pgghg    | 3.150  | 3.411  | 2.576  | 2.266  | 3.827  | 4.083  | 4.068  | 3.874  | 3.970  | 3.700  | 212974 | PGGHG    | NM_145387_7_+1  |
| BC016579 | -4.981 | -4.981 | -1.537 | -3.792 | -4.962 | -4.962 | -1.929 | -4.728 | -4.981 | -4.981 | 212998 | C3orf52  | NM_145389_16_-1 |
| Tnpo2    | 2.913  | 2.725  | 3.557  | 4.015  | 3.914  | 3.518  | 3.589  | 3.622  | 4.177  | 4.417  | 212999 | TNPO2    | NM_145390_8_+1  |
| Tapbp1   | 6.508  | 6.053  | 6.763  | 6.812  | 5.847  | 5.973  | 5.694  | 5.708  | 5.723  | 5.414  | 213233 | TAPBP1   | NM_145391_6_-1  |
| Bag2     | 3.251  | 2.629  | 2.157  | 2.228  | 0.983  | 1.178  | -0.484 | 1.411  | -1.477 | -0.423 | 213539 | BAG2     | NM_145392_1_-1  |
| Ythdf2   | 6.151  | 6.236  | 6.909  | 7.059  | 6.884  | 6.683  | 6.850  | 6.711  | 6.645  | 6.596  | 213541 | YTHDF2   | NM_145393_4_-1  |
| Tbl3     | 4.712  | 4.219  | 4.681  | 4.852  | 4.906  | 4.667  | 4.521  | 4.770  | 5.155  | 4.570  | 213773 | TBL3     | NM_145396_17_-1 |
| Casd1    | 4.599  | 4.915  | 4.372  | 4.574  | 4.723  | 5.080  | 4.572  | 4.758  | 4.697  | 5.584  | 213819 | CASD1    | NM_145398_6_+1  |
| Ube4a    | 3.378  | 3.776  | 4.436  | 4.353  | 4.279  | 4.402  | 4.275  | 4.623  | 4.594  | 5.297  | 140630 | UBE4A    | NM_145400_9_-1  |
| Prkag2   | 2.743  | 2.730  | 2.761  | 2.447  | 2.334  | 2.124  | 2.963  | 3.064  | 4.956  | 4.872  | 108099 | PRKAG2   | NM_145401_5_-1  |
| Tmem51   | 1.588  | -0.391 | 6.353  | 6.188  | 6.986  | 7.203  | 7.226  | 7.389  | 7.682  | 7.525  | 214359 | TMEM51   | NM_145402_4_-1  |
| Tmprss4  | 0.222  | -0.596 | -0.277 | 0.378  | -0.158 | 0.621  | -1.335 | -1.623 | -0.769 | -0.398 | 214523 | TMPRSS4  | NM_145403_9_-1  |
| Prmt7    | 4.629  | 4.359  | 4.316  | 4.855  | 3.803  | 4.070  | 4.095  | 4.666  | 3.791  | 3.805  | 214572 | PRMT7    | NM_145404_8_+1  |
| Ubl4a    | 5.169  | 5.154  | 5.221  | 5.327  | 4.635  | 4.823  | 4.903  | 5.063  | 4.995  | 5.034  | 27643  | UBL4A    | NM_145405_X_-1  |
| Slc10a3  | 4.751  | 4.650  | 4.173  | 4.698  | 3.633  | 4.058  | 3.277  | 3.694  | 4.884  | 4.355  | 214601 | SLC10A3  | NM_145406_X_-1  |
| Usp19    | 0.428  | -2.798 | -4.222 | -4.314 | -3.841 | -4.478 | -1.425 | -4.367 | -4.523 | -4.783 | 71472  | USP19    | NM_145407_9_+1  |
| Chtf18   | -0.840 | 0.010  | 1.090  | 1.835  | 2.208  | 1.883  | 1.541  | 1.991  | 1.169  | 0.051  | 214901 | CHTF18   | NM_145409_17_-1 |
| Fam173a  | 6.932  | 7.099  | 5.353  | 5.527  | 5.547  | 6.000  | 5.750  | 5.937  | 5.497  | 5.191  | 214917 | FAM173A  | NM_145410_17_-1 |
| Chtf8    | 2.222  | 2.418  | 3.294  | 3.913  | 3.651  | 3.729  | 3.648  | 3.407  | 3.633  | 3.909  | 214987 | CHTF8    | NM_145412_8_-1  |
| Fam20b   | 4.751  | 4.836  | 4.544  | 4.764  | 3.950  | 4.339  | 4.389  | 4.727  | 5.270  | 5.625  | 215015 | FAM20B   | NM_145413_1_-1  |
| Nsun5    | 4.303  | 4.500  | 3.887  | 4.144  | 4.078  | 4.219  | 4.008  | 4.185  | 3.676  | 3.860  | 100609 | NSUN5    | NM_145414_5_+1  |
| Diexf    | 2.566  | 2.553  | 2.378  | 2.445  | 2.995  | 2.735  | 2.530  | 2.240  | 2.223  | 1.727  | 215193 | DIEXF    | NM_145415_1_-1  |
| Kri1     | 3.755  | 4.480  | 3.624  | 4.422  | 3.501  | 4.538  | 3.075  | 4.154  | 3.989  | 4.436  | 215194 | KRI1     | NM_145416_9_-1  |
| Rnpep    | 3.662  | 3.934  | 5.936  | 5.938  | 5.537  | 5.334  | 6.352  | 6.522  | 7.748  | 8.010  | 215615 | RNPEP    | NM_145417_1_-1  |
| Ginm1    | 6.166  | 6.046  | 5.459  | 5.138  | 4.874  | 4.776  | 5.054  | 4.820  | 4.975  | 4.692  | 215751 | GINM1    | NM_145418_10_-1 |
| Ube2d1   | 6.321  | 5.975  | 5.158  | 5.261  | 5.870  | 5.815  | 5.352  | 5.485  | 5.246  | 5.503  | 216080 | UBE2D1   | NM_145420_10_-1 |
| Abhd17a  | 8.701  | 8.639  | 7.345  | 7.493  | 6.820  | 7.119  | 6.655  | 6.932  | 6.678  | 6.433  | 216169 | ABHD17A  | NM_145421_10_-1 |
| Rtcb     | 6.833  | 6.754  | 7.555  | 7.341  | 6.757  | 6.580  | 6.608  | 6.585  | 6.277  | 6.099  | 28088  | RTCB     | NM_145422_10_-1 |
| Wdpcp    | 1.914  | 1.869  | 0.728  | -0.213 | 0.719  | 0.859  | 0.841  | -0.178 | 0.939  | -0.478 | 216560 | WDPCP    | NM_145425_11_+1 |
| Mfap3    | 2.154  | 2.773  | 2.434  | 3.230  | 3.061  | 3.325  | 3.325  | 3.143  | 2.526  | 3.476  | 216760 | MFAP3    | NM_145426_11_+1 |
| Atpaf2   | 5.252  | 4.874  | 4.740  | 4.671  | 4.684  | 4.374  | 4.581  | 4.460  | 4.705  | 4.094  | 246782 | ATPAF2   | NM_145427_11_-1 |
| Dhrs7b   | 4.909  | 5.004  | 3.875  | 4.024  | 4.076  | 4.067  | 3.979  | 3.877  | 3.477  | 3.620  | 216820 | DHRS7B   | NM_145428_11_+1 |

|               |        |        |        |        |        |        |        |        |        |        |        |           |                  |
|---------------|--------|--------|--------|--------|--------|--------|--------|--------|--------|--------|--------|-----------|------------------|
| Arrb2         | 4.403  | 4.535  | 5.710  | 5.476  | 6.022  | 5.572  | 6.224  | 6.182  | 6.405  | 6.281  | 216869 | ARRB2     | NM_145429_11_+_1 |
| Fam222b       | 2.880  | 2.946  | 3.481  | 3.637  | 3.746  | 3.671  | 3.699  | 3.725  | 5.116  | 4.858  | 216971 | FAM222B   | NM_145430_11_+_1 |
| Nle1          | 2.091  | 2.193  | 2.307  | 2.242  | 2.266  | 2.324  | 2.019  | 2.153  | 1.991  | 1.678  | 217011 | NLE1      | NM_145431_11_+_1 |
| Heatr6        | 4.935  | 5.381  | 5.079  | 4.932  | 5.303  | 5.246  | 4.702  | 4.663  | 4.836  | 4.811  | 217026 | HEATR6    | NM_145432_11_+_1 |
| Mrm1          | 3.681  | 3.605  | 3.583  | 3.645  | 3.691  | 3.768  | 4.072  | 4.045  | 4.375  | 4.235  | 217038 | MRM1      | NM_145433_11_+_1 |
| Nr1d1         | -1.391 | -1.541 | -2.692 | -1.676 | -0.893 | 2.179  | -1.094 | 0.787  | 0.164  | -0.285 | 217166 | NR1D1     | NM_145434_11_+_1 |
| Cdc27         | 3.869  | 4.414  | 4.090  | 3.596  | 3.964  | 3.577  | 3.751  | 3.258  | 3.836  | 3.930  | 217232 | CDC27     | NM_145436_11_+_1 |
| Cd300ld       | 1.008  | -4.981 | 1.541  | -0.193 | 5.616  | 5.470  | 7.430  | 6.749  | 7.214  | 5.768  | 217305 | CD300LD   | NM_145437_11_+_1 |
| Llg12         | 1.034  | 1.021  | 2.097  | 2.216  | 1.560  | 1.811  | 1.777  | 1.395  | 2.466  | 2.635  | 217325 | LLGL2     | NM_145438_11_+_1 |
| Tmc6          | 4.649  | 4.957  | 4.616  | 4.601  | 4.751  | 4.873  | 5.656  | 5.407  | 6.739  | 6.226  | 217353 | TMC6      | NM_145439_11_+_1 |
| Ubxn2a        | 4.983  | 5.007  | 5.713  | 5.641  | 5.206  | 5.135  | 5.068  | 4.951  | 3.998  | 4.258  | 217379 | UBXN2A    | NM_145441_12_+_1 |
| Mbip          | 5.274  | 5.550  | 4.318  | 4.458  | 4.970  | 5.232  | 4.405  | 4.348  | 3.871  | 3.773  | 217588 | MBIP      | NM_145442_12_+_1 |
| L2hgdh        | 0.359  | 1.206  | 1.705  | 2.624  | 1.403  | 1.927  | 1.235  | 1.291  | -0.232 | 0.650  | 217666 | L2HGDH    | NM_145443_12_+_1 |
| Eif2b2        | 6.179  | 6.125  | 7.252  | 7.393  | 5.341  | 5.351  | 5.432  | 5.907  | 5.890  | 5.482  | 217715 | EIF2B2    | NM_145445_12_+_1 |
| Mfsd7c        | -3.668 | -3.267 | -2.614 | -2.369 | -4.973 | -4.959 | -3.785 | -3.967 | -2.724 | -3.758 | 217721 | FLVCR2    | NM_145447_12_+_1 |
| 9030617003Rik | 4.493  | 4.419  | 5.326  | 5.755  | 5.199  | 5.352  | 5.097  | 4.940  | 5.127  | 5.048  | 217830 | C14orf159 | NM_145448_12_+_1 |
|               | 2.448  | 2.280  | -0.079 | -0.037 | -0.424 | -0.397 | -0.484 | -1.694 | -0.831 | 0.934  | 217887 | C14orf79  | NM_145450_12_+_1 |
| BC022687      | 4.922  | 5.039  | 5.088  | 5.111  | 5.112  | 5.316  | 5.409  | 5.322  | 5.094  | 5.440  | 218397 | RASA1     | NM_145452_13_+_1 |
| Zcchc9        | 5.025  | 5.406  | 4.816  | 5.391  | 4.789  | 5.067  | 4.773  | 5.259  | 4.338  | 4.675  | 69085  | ZCCHC9    | NM_145453_13_+_1 |
| Btf3          | 0.244  | 0.697  | 0.591  | 0.784  | 0.260  | -0.316 | -0.269 | 0.453  | -0.276 | -0.721 | 218490 | BTF3      | NM_145455_13_+_1 |
| Zswim6        | 0.385  | 1.330  | 2.339  | 2.059  | 1.113  | 1.156  | 2.089  | 2.766  | 3.758  | 4.226  | 67263  | ZSWIM6    | NM_145456_13_+_1 |
| Paip1         | 3.700  | 3.770  | 2.702  | 2.715  | 2.522  | 2.801  | 2.897  | 2.921  | 2.325  | 2.621  | 218693 | PAIP1     | NM_145457_13_+_1 |
| Pxk           | 4.461  | 4.237  | 4.456  | 3.979  | 5.470  | 4.727  | 5.544  | 5.205  | 6.018  | 5.167  | 218699 | PXK       | NM_145458_14_+_1 |
| Zfp503        | -4.981 | -4.981 | -4.808 | -4.659 | -4.457 | -2.906 | -2.219 | -1.700 | -0.798 | 0.511  | 218820 | ZNF503    | NM_145459_14_+_1 |
| Oxnad1        | 3.098  | 3.537  | 2.618  | 2.544  | 2.591  | 2.850  | 2.309  | 2.542  | 2.387  | 1.854  | 218885 | OXNAD1    | NM_145460_14_+_1 |
| Haus4         | 4.616  | 4.526  | 4.443  | 3.949  | 4.856  | 4.194  | 4.508  | 4.188  | 3.675  | 2.910  | 219072 | HAUS4     | NM_145462_14_+_1 |
| Shisa2        | -4.981 | -4.981 | -4.981 | -4.981 | -0.725 | 0.376  | -4.824 | -3.176 | -3.925 | -4.981 | 219134 | SHISA2    | NM_145463_14_+_1 |
| Stk24         | 3.677  | 3.669  | 4.237  | 3.842  | 4.951  | 4.864  | 5.193  | 4.431  | 4.969  | 4.508  | 223255 | STK24     | NM_145465_14_+_1 |
| Ggact         | 4.119  | 3.444  | 2.577  | 2.758  | 2.417  | 2.526  | 0.950  | 1.583  | -3.750 | -0.483 | 223267 | GGACT     | NM_145466_14_+_1 |
| Deptor        | 0.694  | -0.566 | 4.500  | 4.729  | 3.620  | 3.375  | 4.955  | 4.803  | 5.446  | 5.761  | 97998  | DEPTOR    | NM_145470_15_+_1 |
| Lrrc14        | 4.287  | 4.342  | 4.376  | 4.331  | 3.846  | 3.843  | 3.702  | 3.503  | 3.863  | 3.777  | 223664 | LRRC14    | NM_145471_15_+_1 |
| C030006K11Rik | 3.389  | 2.673  | 2.609  | 1.453  | 1.446  | 1.069  | 1.749  | 0.780  | 1.695  | 1.414  | 223665 | C8orf82   | NM_145472_15_+_1 |
|               | Csdc2  | -3.090 | -1.814 | -4.729 | -4.755 | -3.433 | -4.959 | -3.658 | -4.922 | -4.394 | -2.993 | 105859    | CSDC2            |
| Cerk          | 5.247  | 3.783  | 4.724  | 4.341  | 5.835  | 5.208  | 5.819  | 5.131  | 6.847  | 6.149  | 223753 | CERK      | NM_145475_15_+_1 |
| Tbc1d22a      | 5.242  | 4.768  | 5.769  | 5.516  | 5.655  | 5.621  | 5.155  | 5.459  | 5.741  | 5.643  | 223754 | TBC1D22A  | NM_145476_15_+_1 |
| Alg12         | 0.690  | 2.001  | 0.652  | -0.603 | -2.623 | 0.513  | -0.712 | -0.618 | -1.614 | -0.194 | 223774 | ALG12     | NM_145477_15_+_1 |
| Pim3          | 3.991  | 3.464  | 3.959  | 3.838  | 5.825  | 5.438  | 5.516  | 5.387  | 5.930  | 5.799  | 223775 | PIM3      | NM_145478_15_+_1 |
| Klhl22        | 4.449  | 4.012  | 2.100  | 2.166  | 3.082  | 3.445  | 3.356  | 3.143  | 3.905  | 3.699  | 224023 | KLHL22    | NM_145479_16_+_1 |
| Rfc4          | 3.077  | 3.144  | 2.743  | 3.671  | 4.058  | 3.892  | 3.896  | 3.724  | 2.120  | 1.747  | 106344 | RFC4      | NM_145480_16_+_1 |
| Setd4         | 2.999  | 3.243  | 1.289  | 1.384  | 0.997  | 1.683  | 1.536  | 1.363  | 1.452  | 1.349  | 224440 | SETD4     | NM_145482_16_+_1 |
| Zfp160        | 2.849  | 3.308  | 3.315  | 3.089  | 3.497  | 3.356  | 3.540  | 3.302  | 3.652  | 4.213  | 224585 | ZNF665    | NM_145483_17_+_1 |
| Zfp758        | 4.926  | 5.018  | 4.295  | 4.235  | 4.255  | 4.187  | 4.422  | 4.333  | 3.775  | 5.132  | 224598 | NA        | NM_145484_17_+_1 |
| March2        | 0.786  | -0.321 | 1.054  | 0.593  | 0.300  | -0.183 | -0.253 | -0.410 | 0.656  | 0.876  | 224703 | MARCH2    | NM_145486_17_+_1 |
| Prr3          | 2.381  | 1.018  | 0.062  | 1.207  | 1.215  | -0.539 | 0.720  | -0.157 | 1.331  | 1.659  | 75210  | PRR3      | NM_145487_17_+_1 |
| Pex6          | 3.911  | 3.896  | 3.688  | 3.816  | 3.899  | 3.926  | 3.991  | 3.882  | 4.469  | 4.473  | 224824 | PEX6      | NM_145488_17_+_1 |
| Al661453      | -3.090 | -4.981 | -2.421 | -2.552 | -3.881 | -4.147 | -1.306 | -4.167 | -4.981 | -4.981 | 224833 | NA        | NM_145489_17_+_1 |
| Zfp959        | 3.753  | 3.652  | 3.315  | 3.228  | 3.302  | 3.072  | 3.326  | 3.349  | 3.594  | 3.627  | 224893 | NA        | NM_145490_17_+_1 |
| Rhoq          | 5.400  | 5.879  | 3.579  | 3.330  | 4.634  | 4.371  | 5.412  | 5.496  | 6.204  | 6.694  | 104215 | RHOQ      | NM_145491_17_+_1 |
| Zfp521        | 3.888  | 3.723  | -1.575 | -1.912 | 2.361  | 2.849  | 0.011  | -1.353 | -4.981 | -1.854 | 225207 | ZNF521    | NM_145492_18_+_1 |
| Me2           | 7.065  | 6.624  | 6.920  | 7.196  | 6.180  | 6.851  | 6.463  | 7.106  | 7.267  | 7.772  | 107029 | ME2       | NM_145494_18_+_1 |
| Rin1          | -0.865 | -1.246 | -0.954 | -1.721 | -1.222 | -0.339 | -1.661 | -2.119 | -1.341 | -1.779 | 225870 | RIN1      | NM_145495_19_+_1 |
| Tkfc          | 0.519  | 0.107  | 1.252  | 1.242  | 1.461  | 1.329  | 1.113  | 0.234  | 0.890  | 1.222  | 225913 | TKFC      | NM_145496_19_+_1 |
| Nmrk1         | 4.131  | 3.964  | 2.930  | 2.236  | 3.819  | 2.685  | 3.391  | 2.549  | 1.882  | 1.304  | 225994 | NMRK1     | NM_145497_19_+_1 |
| Ubt1d1        | 1.534  | 1.544  | 2.387  | 2.553  | 2.280  | 1.550  | 3.570  | 3.532  | 5.030  | 4.495  | 226122 | UBTD1     | NM_145500_19_+_1 |
| Pl4k2a        | 5.011  | 4.461  | 7.051  | 6.512  | 5.731  | 5.459  | 5.714  | 5.579  | 6.668  | 6.573  | 84095  | PI4K2A    | NM_145501_19_+_1 |
| Erlin1        | 2.913  | 2.370  | 4.345  | 3.866  | 3.684  | 3.318  | 2.903  | 2.267  | 3.214  | 3.652  | 226144 | ERLIN1    | NM_145502_19_+_1 |
| Lzts2         | 0.456  | 1.155  | 0.292  | -1.025 | -2.591 | -4.829 | -2.468 | -2.879 | -1.820 | -4.332 | 226154 | LZTS2     | NM_145503_19_+_1 |
| Fam160b1      | 4.911  | 4.392  | 4.463  | 3.994  | 4.460  | 4.343  | 4.149  | 4.290  | 5.466  | 5.010  | 226252 | FAM160B1  | NM_145505_19_+_1 |
| Epb41l5       | -4.981 | -4.981 | -4.298 | -3.391 | -3.990 | -2.317 | -1.579 | -4.085 | -4.981 | -1.378 | 226352 | EPB41L5   | NM_145506_1_+_1  |
| Dars          | -1.413 | -2.117 | -1.486 | -3.136 | -2.933 | -3.470 | -1.890 | -3.898 | -2.326 | -2.543 | 226414 | DARS      | NM_145507_1_+_1  |
| Dyrk3         | 7.571  | 7.049  | 1.730  | 2.431  | 2.465  | 3.059  | 1.137  | 2.390  | 3.666  | 3.188  | 226419 | DYRK3     | NM_145508_1_+_1  |
| Rab7b         | 1.670  | 3.816  | 8.955  | 9.265  | -0.776 | -0.069 | 2.773  | 5.936  | 3.776  | 4.579  | 226421 | RAB7B     | NM_145509_1_+_1  |
| Rabif         | 5.072  | 5.138  | 4.961  | 5.000  | 4.521  | 4.658  | 4.637  | 5.207  | 5.594  | 5.450  | 98710  | RABIF     | NM_145510_1_+_1  |
| BC003331      | 5.935  | 5.788  | 4.877  | 4.886  | 5.072  | 5.199  | 5.114  | 5.177  | 5.224  | 5.360  | 226499 | C1orf27   | NM_145511_1_+_1  |
|               | Sft2d2 | 5.656  | 6.053  | 6.645  | 6.230  | 6.237  | 5.926  | 6.431  | 6.050  | 7.040  | 6.665  | 108735    | SFT2D2           |
| Tiprl         | 6.341  | 6.723  | 6.098  | 6.216  | 5.985  | 6.057  | 5.767  | 5.787  | 5.223  | 5.336  | 226591 | TIPRL     | NM_145513_1_+_1  |
| Wdr26         | 6.117  | 6.248  | 6.306  | 6.268  | 6.066  | 6.161  | 6.463  | 6.381  | 7.158  | 7.331  | 226757 | WDR26     | NM_145514_1_+_1  |
| Mark1         | -4.981 | -4.981 | -4.796 | -4.971 | -4.946 | -4.946 | -4.965 | -4.616 | -4.981 | -4.981 | 226778 | MARK1     | NM_145515_1_+_1  |
| Plekhd2       | 6.189  | 6.519  | 7.261  | 7.331  | 6.101  | 6.546  | 6.285  | 6.544  | 6.731  | 6.932  | 226971 | PLEKHD2   | NM_145516_1_+_1  |
| Ormdl1        | 6.078  | 6.320  | 5.704  | 5.774  | 5.441  | 5.499  | 5.465  | 5.537  | 4.802  | 5.345  | 227102 | ORMDL1    | NM_145517_1_+_1  |
| Ndufs1        | 4.738  | 4.505  | 5.087  | 5.392  | 5.142  | 4.959  | 4.933  | 5.036  | 5.340  | 5.214  | 227197 | NDUFS1    | NM_145518_1_+_1  |
| Farp2         | -2.128 | -3.198 | 3.445  | 3.555  | -1.451 | -0.804 | -0.754 | 0.801  | 0.400  | 0.995  | 227377 | FARP2     | NM_145519_1_+_1  |
| Trub2         | 2.867  | 2.847  | 2.742  | 2.887  | 2.965  | 3.189  | 2.586  | 2.914  | 3.707  | 3.356  | 227682 | TRUB2     | NM_145520_2_+_1  |
| Plpp7         | 1.685  | 2.010  | -2.189 | -1.924 | -1.643 | -0.401 | -0.608 | 1.152  | 1.257  | 1.917  | 227721 | PLPP7     | NM_145521_2_+_1  |

|               |        |        |        |        |        |        |        |        |        |        |        |           |                |
|---------------|--------|--------|--------|--------|--------|--------|--------|--------|--------|--------|--------|-----------|----------------|
| Rabepk        | 4.545  | 4.716  | 3.764  | 3.763  | 3.789  | 3.972  | 3.635  | 3.847  | 3.103  | 3.120  | 227746 | RABEPK    | NM_145522_2_-1 |
| Gca           | 1.772  | 0.953  | 4.796  | 4.950  | 4.087  | 3.824  | 4.253  | 3.024  | 2.890  | 1.462  | 227960 | GCA       | NM_145523_2_+1 |
| Mettl8        | 3.294  | 3.604  | 2.290  | 3.131  | 1.937  | 2.935  | 2.310  | 2.935  | 2.608  | 3.102  | 228019 | METTL8    | NM_145524_2_-1 |
| Osbpl6        | -3.982 | -3.331 | -3.374 | -4.130 | -4.616 | -4.867 | -4.822 | -4.210 | -3.481 | -4.231 | 99031  | OSBPL6    | NM_145525_2_+1 |
| P2rx3         | -2.647 | -4.981 | -3.570 | -4.431 | -3.164 | -3.238 | -2.660 | -3.307 | -4.981 | -2.993 | 228139 | P2RX3     | NM_145526_2_-1 |
| Madd          | 2.829  | 1.765  | 3.216  | 2.777  | 3.552  | 3.199  | 3.325  | 2.263  | 3.874  | 4.232  | 228355 | MADD      | NM_145527_2_-1 |
| Atg13         | 4.515  | 4.579  | 4.827  | 4.804  | 4.726  | 4.992  | 4.864  | 4.923  | 5.868  | 5.970  | 51897  | ATG13     | NM_145528_2_-1 |
| Cstf3         | 4.124  | 5.075  | 4.861  | 5.239  | 4.616  | 4.930  | 4.476  | 4.661  | 3.951  | 4.544  | 228410 | CSTF3     | NM_145529_2_+1 |
| Rhov          | -2.178 | -1.355 | -0.404 | -0.512 | -0.850 | -1.876 | -1.750 | -1.935 | -0.633 | -0.059 | 228543 | RHOV      | NM_145530_2_-1 |
| Spg11         | 3.398  | 3.062  | 5.154  | 4.911  | 5.312  | 5.037  | 4.778  | 4.263  | 4.929  | 4.834  | 214585 | SPG11     | NM_145531_2_-1 |
| Smox          | 1.758  | 2.370  | 0.982  | 1.992  | 1.218  | 2.911  | 2.515  | 2.954  | 4.229  | 3.881  | 228608 | SMOX      | NM_145533_2_+1 |
| Btbd3         | 3.576  | 5.118  | 0.113  | -1.984 | -3.364 | -1.941 | -0.760 | -3.444 | -0.179 | -4.789 | 228662 | NA        | NM_145534_2_+1 |
| Sdcbp2        | 1.667  | 0.489  | -1.845 | -0.652 | -2.158 | -1.508 | -3.257 | -2.463 | -0.592 | -4.981 | 228765 | SDCBP2    | NM_145535_2_+1 |
| Ccm2l         | -1.714 | -4.981 | -3.721 | -3.467 | -4.781 | -4.622 | -3.735 | -4.280 | -3.531 | -4.981 | 228788 | CCM2L     | NM_145536_2_+1 |
| Edem2         | 8.735  | 8.349  | 6.782  | 7.069  | 6.710  | 6.940  | 6.693  | 7.135  | 6.803  | 7.168  | 108687 | EDEM2     | NM_145537_2_-1 |
| Tmem189       | 5.568  | 5.766  | 5.750  | 5.799  | 5.156  | 5.308  | 5.254  | 5.473  | 6.110  | 5.758  | 407243 | TMEM189   | NM_145538_2_-1 |
| Ints3         | 3.332  | 3.662  | 4.014  | 3.794  | 3.621  | 3.930  | 3.560  | 4.032  | 3.644  | 3.827  | 229543 | INTS3     | NM_145540_3_-1 |
| Rap1a         | 9.215  | 9.445  | 8.184  | 8.113  | 8.562  | 8.442  | 8.843  | 8.711  | 8.515  | 8.890  | 109905 | RAP1A     | NM_145541_3_-1 |
| Ahcyl1        | 5.432  | 5.346  | 6.222  | 6.149  | 5.677  | 5.921  | 5.788  | 5.805  | 6.161  | 6.001  | 229709 | AHCYL1    | NM_145542_3_-1 |
| Clcc1         | 5.813  | 5.758  | 5.272  | 5.295  | 5.246  | 5.146  | 5.518  | 5.670  | 5.557  | 5.564  | 229725 | CLCC1     | NM_145543_3_+1 |
| Rap1gds1      | 1.926  | 1.765  | 3.585  | 3.261  | 3.783  | 3.673  | 3.629  | 2.870  | 3.575  | 4.332  | 229877 | RAP1GDS1  | NM_145544_3_-1 |
| Gbp7          | 0.502  | -1.302 | -1.603 | 0.266  | -0.107 | -1.187 | -0.678 | -2.165 | -0.033 | 1.279  | 229900 | GBP7      | NM_145545_3_+1 |
| Gtf2b         | 7.036  | 7.374  | 6.283  | 6.367  | 6.561  | 6.619  | 6.329  | 6.342  | 5.893  | 6.001  | 229906 | GTF2B     | NM_145546_3_+1 |
| Zfp189        | 0.682  | 1.562  | 1.943  | 1.754  | 0.232  | 1.045  | 0.035  | 1.416  | 1.177  | 1.508  | 230162 | ZNF189    | NM_145547_4_+1 |
| Efcab7        | 1.449  | 2.922  | -0.014 | 0.981  | 0.531  | 1.031  | -0.403 | 0.796  | -0.374 | 0.549  | 230500 | EFCAB7    | NM_145549_4_+1 |
| Yipf1         | 6.884  | 6.457  | 5.965  | 5.745  | 5.936  | 5.771  | 5.971  | 5.856  | 6.347  | 5.911  | 230584 | YIPF1     | NM_145550_4_+1 |
| Gnl2          | 5.756  | 5.606  | 5.606  | 5.715  | 6.294  | 6.566  | 6.075  | 5.723  | 5.385  | 4.806  | 230737 | GNL2      | NM_145552_4_+1 |
| Fam76a        | 4.882  | 4.771  | 4.311  | 4.329  | 4.413  | 4.685  | 4.574  | 4.351  | 4.638  | 4.665  | 230789 | FAM76A    | NM_145553_4_-1 |
| Ldlrap1       | 1.698  | 1.652  | 2.477  | 2.902  | 2.453  | 2.908  | 4.419  | 4.891  | 5.922  | 5.544  | 100017 | LDLRAP1   | NM_145554_4_-1 |
| Ncmap         | -4.981 | -4.981 | -4.981 | -4.981 | -4.976 | -4.896 | -4.981 | -4.980 | -4.947 | -4.981 | 230822 | NCMAP     | NM_145555_4_-1 |
| Tardbp        | 6.378  | 6.562  | 6.868  | 6.761  | 6.935  | 6.932  | 6.478  | 6.599  | 5.666  | 6.280  | 230908 | TARDBP    | NM_145556_4_-1 |
| 9430015G10Rik | 2.329  | 1.611  | 1.006  | 2.404  | 3.108  | 3.361  | 2.747  | 3.193  | 2.604  | 2.917  | 230996 | C1orf159  | NM_145557_4_+1 |
| Hadhb         | 7.262  | 7.217  | 6.837  | 6.825  | 6.067  | 5.915  | 6.169  | 6.296  | 6.226  | 6.148  | 231086 | HADHB     | NM_145558_5_+1 |
| Slc2a9        | -4.981 | -2.073 | -4.161 | -3.236 | -3.787 | -3.842 | -3.498 | -3.287 | -0.062 | -0.747 | 117591 | SLC2A9    | NM_145559_5_-1 |
| Tmprss11d     | -3.090 | -0.602 | -5.016 | -4.824 | -1.430 | 1.972  | -4.903 | -3.562 | -4.981 | -4.981 | 231382 | TMPRSS11D | NM_145561_5_-1 |
| Parm1         | -1.581 | -1.499 | -4.426 | -3.246 | -1.462 | -0.724 | -2.361 | -1.107 | -2.377 | -4.981 | 231440 | PARM1     | NM_145562_5_+1 |
| Zfp932        | 4.846  | 4.189  | 3.756  | 3.471  | 4.063  | 3.980  | 4.301  | 3.593  | 3.099  | 3.430  | 69504  | NA        | NM_145563_5_+1 |
| Fbxo21        | 3.272  | 3.407  | 3.707  | 3.630  | 3.996  | 3.768  | 3.590  | 3.239  | 3.861  | 3.404  | 231670 | FBXO21    | NM_145564_5_+1 |
| Hibadh        | 7.299  | 7.389  | 6.487  | 6.594  | 5.891  | 5.943  | 5.873  | 6.045  | 5.671  | 5.724  | 58875  | HIBADH    | NM_145567_6_-1 |
| Krcc1         | 6.410  | 6.233  | 6.652  | 6.709  | 5.992  | 5.699  | 6.028  | 5.647  | 5.298  | 5.343  | 57896  | KRCC1     | NM_145568_6_+1 |
| Mat2a         | 6.930  | 6.997  | 7.799  | 7.607  | 7.303  | 7.346  | 7.448  | 7.653  | 7.571  | 7.816  | 232087 | MAT2A     | NM_145569_6_-1 |
| Eva1a         | -4.981 | -1.137 | -0.186 | 2.396  | -3.534 | -3.192 | -4.806 | -1.199 | -4.981 | -4.981 | 232146 | EVA1A     | NM_145570_6_+1 |
| Mob1a         | 3.534  | 3.632  | 5.973  | 6.014  | 5.876  | 5.931  | 5.845  | 6.041  | 7.017  | 7.355  | 232157 | MOB1A     | NM_145571_6_+1 |
| Mrps35        | 6.108  | 6.576  | 4.920  | 5.419  | 4.921  | 5.455  | 5.015  | 5.279  | 4.300  | 4.356  | 232536 | MRPS35    | NM_145573_6_+1 |
| Cald1         | -3.349 | -2.060 | -2.435 | -3.214 | -2.563 | -3.913 | -1.027 | -1.851 | -0.378 | -0.617 | 109624 | NA        | NM_145575_6_+1 |
| Zfp212        | 2.707  | 2.073  | 2.765  | 2.918  | 3.127  | 2.560  | 2.786  | 2.572  | 3.437  | 3.500  | 232784 | ZNF212    | NM_145576_6_+1 |
| Zfp772        | 1.908  | 2.062  | 1.072  | 1.194  | 1.455  | 1.174  | 1.037  | 0.920  | 1.806  | 1.416  | 232855 | ZNF773    | NM_145577_7_-1 |
| Ube2m         | 4.901  | 5.113  | 4.951  | 5.300  | 4.495  | 4.583  | 4.225  | 4.315  | 4.744  | 4.488  | 22192  | UBE2M     | NM_145578_7_-1 |
| Mypop         | -0.406 | -0.615 | -0.796 | -0.609 | -0.614 | -0.539 | -1.014 | -1.423 | -1.109 | -0.560 | 232934 | MYPOP     | NM_145579_7_+1 |
| Igflr1        | 2.060  | 1.971  | 1.999  | 2.115  | 3.120  | 3.982  | 2.420  | 3.088  | 3.058  | 2.771  | 101883 | IGFLR1    | NM_145580_7_+1 |
| Siglec8       | -4.359 | -4.981 | -2.426 | -1.488 | 0.213  | -0.323 | 0.330  | -0.273 | 0.735  | -4.852 | 233186 | SIGLEC8   | NM_145581_7_+1 |
| Ctu1          | 2.111  | 1.838  | 1.615  | 1.875  | 1.866  | 1.992  | 2.080  | 2.314  | 2.861  | 2.696  | 233189 | CTU1      | NM_145582_7_+1 |
| Pgap2         | 4.630  | 4.305  | 5.724  | 5.895  | 5.530  | 5.476  | 5.917  | 5.828  | 5.426  | 5.372  | 233575 | NA        | NM_145583_7_+1 |
| Spon1         | 1.818  | 2.084  | -0.783 | -0.494 | 3.387  | 1.690  | 3.831  | 3.851  | 2.366  | 2.842  | 233744 | SPON1     | NM_145584_7_+1 |
| Thumpd1       | 5.546  | 5.598  | 5.413  | 5.390  | 5.533  | 5.534  | 5.406  | 5.364  | 5.064  | 5.048  | 233802 | THUMPD1   | NM_145585_7_-1 |
| Tmem159       | 2.701  | 2.981  | 3.203  | 3.449  | 1.641  | 2.476  | 3.351  | 3.737  | 4.122  | 4.446  | 233806 | TMEM159   | NM_145586_7_+1 |
| Sbk1          | 2.920  | 2.772  | 0.175  | 0.848  | 0.988  | 1.992  | 2.754  | 4.297  | 5.548  | 6.272  | 104175 | SBK1      | NM_145587_7_+1 |
| Kif22         | 0.442  | 0.127  | 3.362  | 3.827  | 4.501  | 4.007  | 3.995  | 3.536  | 2.898  | 1.905  | 110033 | KIF22     | NM_145588_7_-1 |
| Prr14         | 5.582  | 5.676  | 5.804  | 5.901  | 6.179  | 6.072  | 6.087  | 6.033  | 6.563  | 6.354  | 233895 | PRR14     | NM_145589_7_+1 |
| BC017158      | 3.611  | 3.146  | 3.410  | 3.884  | 3.583  | 3.702  | 3.841  | 4.159  | 4.104  | 4.043  | 233913 | C16orf58  | NM_145590_7_-1 |
| Zfp958        | 3.887  | 3.809  | 3.887  | 3.817  | 4.026  | 4.042  | 4.004  | 3.739  | 3.282  | 3.910  | 233987 | NA        | NM_145591_8_+1 |
| Cbr4          | 4.724  | 4.438  | 4.334  | 4.090  | 3.729  | 3.825  | 3.505  | 3.301  | 3.140  | 2.913  | 234309 | CBR4      | NM_145595_8_+1 |
| Gatad2a       | 3.227  | 3.780  | 4.888  | 5.034  | 5.355  | 4.737  | 5.052  | 4.597  | 5.319  | 5.027  | 234366 | GATAD2A   | NM_145596_8_-1 |
| Tmem161a      | 4.172  | 3.926  | 2.151  | 1.850  | 2.862  | 3.490  | 3.045  | 2.573  | 3.009  | 3.293  | 234371 | TMEM161A  | NM_145597_8_+1 |
| Nxn1l         | 1.430  | 1.870  | -1.780 | -2.224 | -2.310 | -3.013 | -3.666 | -4.054 | -4.981 | -1.774 | 234404 | NXN1L     | NM_145598_8_-1 |
| Tmem184c      | 4.743  | 4.721  | 4.504  | 4.706  | 4.335  | 4.307  | 4.205  | 4.395  | 4.074  | 4.861  | 234463 | TMEM184C  | NM_145599_8_-1 |
| Zfp330        | 6.323  | 6.258  | 6.015  | 6.034  | 5.858  | 5.815  | 5.823  | 5.771  | 5.067  | 5.369  | 30932  | ZNF330    | NM_145600_8_-1 |
| Cngb1         | -1.665 | -4.981 | -4.127 | -3.646 | -4.916 | -3.332 | -1.682 | -3.160 | -2.265 | -2.571 | 333329 | NA        | NM_145601_8_-1 |
| Ndrgr4        | -4.981 | -0.925 | -1.617 | -1.720 | -3.083 | -2.274 | -4.597 | -4.529 | -4.981 | -2.202 | 234593 | NDRG4     | NM_145602_8_+1 |
| Ces2c         | -4.981 | -4.981 | -1.363 | 1.687  | -3.994 | -1.504 | -4.886 | -2.440 | -4.981 | -4.981 | 234671 | NA        | NM_145603_8_+1 |
| D230025D16Rik | 3.556  | 3.700  | 3.969  | 3.712  | 3.859  | 3.920  | 4.448  | 4.436  | 5.985  | 5.630  | 234678 | C16orf70  | NM_145604_8_+1 |
| Klhdc4        | 4.954  | 4.595  | 4.747  | 4.213  | 4.640  | 4.138  | 4.733  | 3.915  | 4.310  | 3.486  | 234825 | KLHDC4    | NM_145605_8_-1 |
| Chmp1a        | 6.745  | 6.757  | 7.187  | 7.309  | 7.013  | 7.089  | 7.026  | 7.066  | 7.676  | 7.368  | 234852 | CHMP1A    | NM_145606_8_-1 |
| Ttc13         | 5.170  | 4.398  | 3.800  | 3.853  | 3.798  | 3.729  | 3.712  | 4.207  | 4.748  | 4.993  | 234875 | TTC13     | NM_145607_8_-1 |

|               |        |        |        |        |        |        |        |        |        |        |        |          |                 |
|---------------|--------|--------|--------|--------|--------|--------|--------|--------|--------|--------|--------|----------|-----------------|
| Msantd4       | 3.830  | 4.314  | 4.289  | 4.352  | 4.165  | 3.997  | 3.771  | 4.268  | 3.589  | 4.273  | 78100  | MSANTD4  | NM_145609_9_+1  |
| Ppan          | 5.013  | 4.990  | 5.711  | 5.811  | 5.073  | 5.066  | 4.938  | 4.984  | 3.761  | 3.194  | 235036 | PPAN     | NM_145610_9_+1  |
| Kank2         | 2.211  | 2.576  | -2.905 | -3.328 | -4.009 | -2.894 | -2.433 | -2.887 | 0.147  | -1.577 | 235041 | KANK2    | NM_145611_9_-1  |
| Zfp810        | 5.809  | 5.622  | 4.072  | 3.845  | 4.057  | 3.814  | 3.720  | 3.633  | 3.327  | 3.407  | 235050 | NA       | NM_145612_9_-1  |
| Dlat          | 4.639  | 4.828  | 4.945  | 5.062  | 4.909  | 4.989  | 5.086  | 5.130  | 5.593  | 5.539  | 235339 | DLAT     | NM_145614_9_-1  |
| Etfa          | 7.237  | 7.259  | 6.832  | 7.013  | 6.858  | 6.842  | 6.797  | 6.716  | 6.050  | 6.156  | 110842 | ETFA     | NM_145615_9_-1  |
| Lrrc49        | -4.408 | -4.765 | -0.432 | -0.018 | -1.359 | -1.038 | -1.842 | -0.429 | 0.959  | 0.963  | 102747 | LRRC49   | NM_145616_9_-1  |
| Herc1         | 5.456  | 5.430  | 5.949  | 5.959  | 6.573  | 6.695  | 6.120  | 6.053  | 6.110  | 6.255  | 235439 | HERC1    | NM_145617_9_+1  |
| Ice2          | 3.838  | 4.492  | 3.389  | 3.200  | 3.606  | 3.876  | 3.379  | 3.612  | 2.700  | 3.424  | 93697  | ICE2     | NM_145618_9_+1  |
| Parp3         | 5.711  | 5.510  | 4.431  | 3.325  | 4.413  | 3.703  | 4.175  | 2.666  | 4.395  | 2.892  | 235587 | PARP3    | NM_145619_9_-1  |
| Rrp9          | 4.720  | 4.740  | 4.137  | 4.269  | 4.431  | 4.507  | 4.122  | 4.299  | 3.515  | 3.479  | 27966  | RRP9     | NM_145620_9_+1  |
| Camkv         | -0.533 | -0.243 | -4.981 | -4.981 | -4.961 | -4.961 | -4.981 | -4.981 | -4.981 | -4.981 | 235604 | CAMKV    | NM_145621_9_+1  |
| Zfp65         | 2.575  | 2.825  | 3.176  | 2.825  | 3.275  | 2.662  | 3.105  | 2.720  | 2.534  | 3.281  | 235907 | ZNF253   | NM_145622_13_-1 |
| Zfp709        | 2.580  | 2.800  | 3.055  | 1.787  | 2.305  | 2.827  | 3.092  | 2.566  | 3.005  | 3.753  | 236193 | ZNF443   | NM_145624_8_+1  |
| Eif4b         | 6.438  | 6.386  | 7.123  | 7.371  | 7.651  | 7.660  | 7.781  | 7.525  | 7.208  | 7.387  | 75705  | EIF4B    | NM_145625_15_+1 |
| Rbm10         | -3.937 | -3.825 | -4.229 | -0.152 | -3.174 | -2.763 | -2.710 | -3.457 | -1.789 | -4.168 | 236732 | RBM10    | NM_145627_X_+1  |
| Usp11         | 5.038  | 4.943  | 3.935  | 3.400  | 5.027  | 5.068  | 3.595  | 3.614  | 0.779  | 2.340  | 236733 | USP11    | NM_145628_X_+1  |
| Pls3          | -3.669 | -3.609 | -4.246 | -3.177 | -4.729 | -4.926 | -4.419 | -4.796 | -4.538 | -4.810 | 102866 | PLS3     | NM_145629_X_-1  |
| Pdk3          | 6.071  | 5.985  | 5.770  | 5.934  | 6.085  | 6.210  | 6.257  | 6.216  | 5.531  | 5.766  | 236900 | PDK3     | NM_145630_X_-1  |
| Polr2h        | 5.364  | 5.381  | 5.208  | 5.131  | 4.979  | 4.819  | 5.087  | 4.967  | 3.550  | 3.704  | 245841 | POLR2H   | NM_145632_16_+1 |
| Ankrd27       | 4.924  | 4.797  | 4.425  | 4.684  | 4.781  | 5.081  | 4.569  | 4.320  | 4.695  | 4.882  | 245886 | ANKRD27  | NM_145633_7_+1  |
| Cd300lf       | 6.171  | 6.540  | 2.391  | 2.785  | 6.912  | 7.286  | 4.912  | 4.580  | 3.902  | 3.540  | 246746 | CD300LF  | NM_145634_11_-1 |
| Il27          | -2.013 | -4.981 | 0.288  | 0.800  | -0.963 | -0.335 | 0.743  | 0.775  | 1.648  | 1.184  | 246779 | IL27     | NM_145636_7_-1  |
| Alox12e       | -4.981 | -4.981 | -4.388 | -4.972 | -4.963 | -4.963 | -1.373 | -4.798 | -4.981 | -4.981 | 11685  | NA       | NM_145684_11_-1 |
| Cep112        | -4.981 | -4.981 | -4.981 | -4.981 | -1.387 | -1.650 | -4.981 | -4.981 | -4.981 | -4.981 | 76380  | CEP112   | NM_145688_11_+1 |
| Ppp1r42       | -4.981 | -2.600 | -4.942 | -4.942 | -4.982 | -4.415 | -4.623 | -3.675 | -1.124 | -4.981 | 69312  | PPP1R42  | NM_145692_1_-1  |
| Ackr4         | -3.668 | -4.981 | -3.722 | -4.220 | -2.938 | -3.204 | -4.031 | -3.876 | -3.242 | -2.588 | 252837 | ACKR4    | NM_145700_9_-1  |
| Kcnp2         | -4.920 | -4.981 | -4.981 | -4.981 | -4.975 | -4.981 | -4.966 | -4.979 | -4.965 | -4.977 | 80906  | KCNIP2   | NM_145703_19_-1 |
| Kcnp2         | -4.850 | -4.981 | -4.940 | -3.874 | -4.953 | -4.973 | -4.944 | -4.975 | -4.935 | -4.965 | 80906  | KCNIP2   | NM_145704_19_-1 |
| Tinf2         | 4.166  | 4.704  | 5.808  | 6.029  | 5.346  | 5.302  | 5.447  | 5.210  | 4.743  | 4.368  | 28113  | TINF2    | NM_145705_14_-1 |
| Nup43         | 3.787  | 3.955  | 3.009  | 3.376  | 3.356  | 3.090  | 3.325  | 2.949  | 1.672  | 1.142  | 69912  | NUP43    | NM_145706_10_+1 |
| Tox           | -4.981 | -1.589 | -2.737 | -1.043 | -3.819 | -1.504 | -2.183 | -0.315 | -4.394 | -2.616 | 252838 | TOX      | NM_145711_4_-1  |
| Hist1h1d      | 0.755  | 1.020  | 1.980  | 1.291  | 3.483  | 2.481  | 3.147  | 1.919  | 3.105  | 1.887  | 14957  | HIST1H1D | NM_145713_13_+1 |
| Dhx35         | 2.088  | 1.618  | 1.828  | 2.025  | 2.369  | 2.100  | 1.798  | 2.169  | 2.831  | 2.727  | 71715  | DHX35    | NM_145742_2_+1  |
| Lace1         | 2.428  | 2.663  | 1.927  | 1.512  | 2.164  | 2.189  | 1.754  | 2.068  | 1.882  | 2.307  | 215951 | LACE1    | NM_145743_10_-1 |
| 0610010K14Rik | 4.931  | 4.697  | 3.821  | 3.809  | 4.334  | 4.393  | 4.235  | 4.050  | 2.680  | 3.008  | 104457 | C17orf49 | NM_145758_11_-1 |
| Arfgap1       | 3.915  | 4.298  | 3.974  | 4.486  | 3.749  | 4.335  | 4.173  | 4.364  | 4.917  | 4.673  | 228998 | ARFGAP1  | NM_145760_2_+1  |
| Mzf1          | -4.201 | -4.178 | -2.608 | -4.774 | -3.367 | -3.111 | -2.396 | -4.901 | -0.346 | -2.306 | 109889 | MZF1     | NM_145819_7_-1  |
| Veph1         | -3.189 | -2.260 | -3.567 | -3.312 | -3.529 | -4.205 | -3.323 | -4.478 | -2.338 | -2.789 | 72789  | VEPH1    | NM_145820_3_-1  |
| Cd3eap        | 4.324  | 4.117  | 4.811  | 4.576  | 4.064  | 4.020  | 4.118  | 3.741  | 3.793  | 3.287  | 70333  | CD3EAP   | NM_145822_7_-1  |
| Pitpnc1       | 2.440  | 2.180  | 2.130  | 2.335  | 3.758  | 4.089  | 3.693  | 3.807  | 3.452  | 3.804  | 71795  | NA       | NM_145823_11_-1 |
| Ranbp10       | 3.916  | 3.988  | 5.135  | 5.161  | 4.811  | 4.867  | 5.001  | 4.782  | 5.091  | 5.056  | 74334  | RANBP10  | NM_145824_8_-1  |
| Cetn4         | 0.678  | -1.062 | 2.371  | 0.461  | 0.056  | -1.174 | -0.181 | -1.149 | -1.488 | -3.758 | 207175 | NA       | NM_145825_3_-1  |
| Il17re        | 0.420  | -0.356 | -3.079 | -2.792 | -3.973 | -1.066 | -4.551 | -1.242 | -1.596 | -3.229 | 57890  | IL17RE   | NM_145826_6_+1  |
| Nlrp3         | 0.140  | 1.280  | 3.124  | 3.337  | 4.771  | 5.264  | 4.758  | 4.946  | 4.801  | 5.709  | 216799 | NLRP3    | NM_145827_11_+1 |
| Xylt2         | 3.146  | 3.122  | 2.534  | 2.779  | 2.952  | 3.102  | 3.395  | 3.263  | 4.397  | 4.445  | 217119 | XYLT2    | NM_145828_11_-1 |
| Nags          | -4.981 | -4.981 | -4.089 | -2.598 | -4.575 | -4.604 | -4.969 | -2.883 | -4.981 | -3.461 | 217214 | NAGS     | NM_145829_11_+1 |
| Ehmt2         | 0.172  | 1.321  | 1.993  | 1.867  | 1.338  | 1.455  | 1.706  | 1.119  | 2.479  | 2.940  | 110147 | EHMT2    | NM_145830_17_+1 |
| Dmrt2         | -0.593 | 0.554  | -4.935 | -2.147 | -3.066 | -0.034 | -4.935 | -3.365 | -4.981 | -4.981 | 226049 | DMRT2    | NM_145831_19_+1 |
| Slc35c1       | 2.178  | 2.108  | 2.837  | 3.296  | 3.264  | 2.864  | 3.895  | 3.323  | 5.747  | 5.418  | 228368 | SLC35C1  | NM_145832_2_-1  |
| Lin28a        | -3.090 | -2.883 | -4.959 | -4.959 | -4.605 | -4.145 | -3.575 | -2.925 | -0.359 | -4.316 | 83557  | LIN28A   | NM_145833_4_-1  |
| Il17c         | -4.981 | -3.267 | -4.292 | -4.451 | -4.017 | -4.594 | -3.648 | -4.323 | -2.809 | -3.816 | 234836 | IL17C    | NM_145834_8_+1  |
| Irf2bpl       | 1.484  | 2.226  | 1.299  | 1.285  | 1.889  | 2.350  | 2.484  | 3.359  | 4.356  | 4.616  | 238330 | IRF2BPL  | NM_145836_12_-1 |
| Il17d         | 1.353  | 2.247  | -1.820 | -2.181 | -1.272 | -1.874 | -3.291 | -3.858 | -4.981 | -4.981 | 239114 | IL17D    | NM_145837_14_+1 |
| St8sia6       | 2.504  | 0.300  | 2.547  | 3.234  | 7.005  | 7.439  | 6.696  | 6.206  | 1.559  | 3.244  | 241230 | ST8SIA6  | NM_145838_2_-1  |
| Rasgef1b      | 2.238  | 1.562  | 4.848  | 5.114  | 6.705  | 7.078  | 5.648  | 5.427  | 2.766  | 2.497  | 320292 | RASGEF1B | NM_145839_5_-1  |
| Rgs9bp        | -4.981 | -4.981 | -1.295 | -0.526 | -0.604 | -0.644 | -1.913 | -1.804 | -4.981 | -4.227 | 243923 | RG9BP    | NM_145840_7_-1  |
| Cables2       | 4.002  | 3.790  | 4.966  | 5.240  | 4.364  | 4.399  | 4.597  | 4.615  | 5.117  | 4.736  | 252966 | CABLES2  | NM_145851_2_-1  |
| Ropn1l        | 2.169  | 0.935  | 2.312  | 2.114  | 0.496  | 0.696  | 1.008  | 1.158  | 0.910  | 1.504  | 252967 | ROPN1L   | NM_145852_15_-1 |
| Tpcn1         | -1.034 | -0.283 | 2.114  | 2.001  | 1.447  | 1.792  | 2.654  | 2.560  | 3.566  | 2.953  | 252972 | TPCN1    | NM_145853_5_-1  |
| Il17f         | -4.981 | -4.981 | -3.129 | -4.931 | -3.952 | -4.643 | -3.199 | -4.934 | -3.750 | -4.981 | 257630 | IL17F    | NM_145856_1_-1  |
| Nod2          | 0.649  | -0.356 | 2.513  | 3.954  | 2.365  | 4.186  | 2.650  | 3.836  | 2.317  | 5.361  | 257632 | NOD2     | NM_145857_8_+1  |
| Grhl1         | -2.769 | -0.750 | -2.099 | -4.278 | -1.686 | -4.406 | -2.465 | -3.299 | -1.815 | -1.035 | 195733 | GRHL1    | NM_145890_12_+1 |
| Porcn         | -4.149 | -3.809 | -3.855 | -4.817 | -4.141 | -4.952 | -3.906 | -4.855 | -3.471 | -4.925 | 53627  | PORCN    | NM_145907_X_-1  |
| Porcn         | -4.204 | -3.854 | -0.930 | -1.028 | -4.515 | -1.722 | -2.650 | -1.680 | -1.154 | -0.025 | 53627  | PORCN    | NM_145908_X_-1  |
| Zfp7          | 1.704  | 1.827  | 1.492  | 2.090  | 1.585  | 1.745  | 1.751  | 1.638  | 2.258  | 2.578  | 223669 | ZNF7     | NM_145916_15_+1 |
| Abhd14a       | -4.161 | 3.982  | -3.029 | -0.592 | -3.924 | -1.153 | -2.155 | 0.659  | -2.826 | -0.851 | 68644  | ABHD14A  | NM_145919_9_-1  |
| Rel1          | 7.737  | 7.805  | 4.197  | 3.911  | 4.240  | 3.908  | 4.712  | 4.363  | 5.682  | 5.415  | 100532 | RELL1    | NM_145923_5_-1  |
| Cenpi         | 0.964  | 0.357  | 2.249  | 1.814  | 1.859  | 1.535  | 1.383  | -1.126 | -3.778 | 0.044  | 102920 | CENPI    | NM_145924_X_+1  |
| Pttg1ip       | 6.718  | 6.969  | 7.361  | 7.420  | 6.010  | 6.282  | 6.518  | 6.904  | 7.297  | 7.407  | 108705 | PTTG1IP  | NM_145925_10_+1 |
| Mgat4b        | 3.019  | 2.649  | 4.658  | 4.659  | 2.954  | 3.190  | 4.138  | 4.221  | 4.684  | 4.796  | 103534 | MGAT4B   | NM_145926_11_+1 |
| Fntb          | 1.522  | 1.775  | 1.021  | 0.970  | 0.822  | 0.848  | 0.770  | 1.291  | 0.648  | 0.876  | 110606 | FNTB     | NM_145927_12_+1 |
| Tspan14       | 5.456  | 5.327  | 5.121  | 5.105  | 5.822  | 6.372  | 6.493  | 6.663  | 7.694  | 7.616  | 52588  | TSPAN14  | NM_145928_14_-1 |
| Gga1          | 3.703  | 3.711  | 4.759  | 4.780  | 4.648  | 4.300  | 4.775  | 4.736  | 5.758  | 5.573  | 106039 | GGA1     | NM_145929_15_+1 |

|               |        |        |        |        |        |        |        |        |        |        |           |          |                 |
|---------------|--------|--------|--------|--------|--------|--------|--------|--------|--------|--------|-----------|----------|-----------------|
| AW549877      | 5.113  | 5.049  | 5.747  | 5.377  | 3.701  | 4.143  | 5.076  | 5.441  | 5.878  | 6.406  | 106064    | C5orf51  | NM_145930_15_-1 |
| Zc3h7a        | 6.194  | 6.361  | 6.891  | 6.702  | 6.239  | 6.060  | 6.137  | 6.224  | 6.303  | 6.568  | 106205    | ZC3H7A   | NM_145931_16_-1 |
| Slc51a        | -4.981 | -4.981 | -4.950 | -4.950 | -4.483 | -4.307 | -4.843 | -4.044 | -4.981 | -4.981 | 106407    | SLC51A   | NM_145932_16_-1 |
| St6gal1       | 5.144  | 5.723  | 5.489  | 5.423  | 5.572  | 6.019  | 5.324  | 5.668  | 3.406  | 5.051  | 20440     | ST6GAL1  | NM_145933_16_+1 |
| Stap2         | 0.289  | 0.361  | 3.186  | 4.154  | 2.347  | 2.840  | 2.851  | 2.143  | -0.885 | -4.981 | 106766    | STAP2    | NM_145934_17_-1 |
| Sumf1         | 6.162  | 6.274  | 6.654  | 6.586  | 6.749  | 6.378  | 6.521  | 6.150  | 6.819  | 7.041  | 58911     | SUMF1    | NM_145937_6_-1  |
| Rpp40         | 4.347  | 4.734  | 2.085  | 2.524  | 2.217  | 2.190  | 2.408  | 2.398  | 0.812  | 1.461  | 208366    | RPP40    | NM_145938_13_-1 |
| Alg3          | 5.091  | 5.182  | 4.308  | 4.422  | 4.516  | 4.483  | 4.217  | 4.528  | 3.826  | 3.741  | 208624    | ALG3     | NM_145939_16_-1 |
| Wipi1         | -0.709 | 0.389  | -0.751 | -0.169 | -1.312 | 0.206  | 0.847  | 1.894  | 3.156  | 2.844  | 52639     | WIP1     | NM_145940_11_-1 |
| Eif4g1        | 4.349  | 4.190  | 5.262  | 5.470  | 5.408  | 5.414  | 5.179  | 5.351  | 6.121  | 6.111  | 208643    | EIF4G1   | NM_145941_16_+1 |
| Hmgcs1        | 4.175  | 5.669  | 3.827  | 3.214  | 3.004  | 3.451  | 3.344  | 2.517  | 3.523  | 4.132  | 208715    | HMGCS1   | NM_145942_13_+1 |
| Sde2          | 5.732  | 5.767  | 5.275  | 5.251  | 5.468  | 5.616  | 5.819  | 5.658  | 5.537  | 5.423  | 208768    | SDE2     | NM_145943_1_+1  |
| Ccdc25        | 5.121  | 4.975  | 4.933  | 4.793  | 4.955  | 4.845  | 4.939  | 4.810  | 4.294  | 4.301  | 67179     | CCDC25   | NM_145944_14_+1 |
| Fanci         | -2.187 | -1.525 | 1.099  | 1.004  | 1.810  | 1.002  | 1.163  | 0.988  | 1.064  | -0.452 | 208836    | FANCI    | NM_145946_7_+1  |
| Ido2          | -4.981 | -4.981 | -2.890 | -4.945 | -3.837 | -2.748 | -3.699 | -2.021 | -4.981 | -4.981 | 209176    | IDO2     | NM_145949_8_-1  |
| Osgin2        | 3.771  | 3.753  | 3.529  | 3.516  | 4.622  | 4.599  | 4.569  | 4.235  | 4.162  | 4.094  | 209212    | OSGIN2   | NM_145950_4_-1  |
| Enox2         | -4.752 | -4.330 | -2.716 | -3.674 | -4.936 | -4.973 | -4.847 | -4.969 | -1.531 | -4.575 | 209224    | ENOX2    | NM_145951_X_-1  |
| Tbc1d12       | 1.897  | 1.878  | 2.407  | 1.827  | 0.723  | 1.492  | 1.237  | 1.429  | 1.495  | 2.102  | 209478    | TBC1D12  | NM_145952_19_+1 |
| Cth           | -4.981 | 0.175  | -0.936 | 1.231  | -3.481 | -2.809 | -3.564 | -1.085 | -4.981 | -1.296 | 107869    | CTH      | NM_145953_3_-1  |
| Aldh16a1      | 3.945  | 3.586  | 5.276  | 5.465  | 4.958  | 4.802  | 5.178  | 5.013  | 5.374  | 5.297  | 69748     | ALDH16A1 | NM_145954_7_-1  |
| Mcmbp         | 5.919  | 5.966  | 6.352  | 6.230  | 6.201  | 6.057  | 6.371  | 6.478  | 7.032  | 7.070  | 210711    | MCMBP    | NM_145955_7_-1  |
| Brcc3         | 1.115  | 0.303  | 0.088  | -0.305 | -0.977 | -0.729 | 0.789  | -0.870 | 0.629  | 1.537  | 210766    | BRCC3    | NM_145956_X_+1  |
| Kbtbd2        | 4.801  | 4.614  | 5.267  | 5.292  | 5.065  | 5.143  | 5.330  | 5.655  | 6.128  | 6.471  | 210973    | KBTBD2   | NM_145958_6_-1  |
| Fam91a1       | 5.175  | 5.434  | 7.048  | 6.848  | 5.733  | 5.945  | 5.983  | 6.138  | 6.505  | 6.730  | 210998    | FAM91A1  | NM_145959_15_+1 |
| Mtrf1         | 4.076  | 3.877  | 3.144  | 2.837  | 3.187  | 2.941  | 2.904  | 3.205  | 2.786  | 2.926  | 211253    | MTRF1    | NM_145960_14_+1 |
| Pank3         | 4.098  | 3.925  | 4.409  | 3.365  | 4.099  | 3.583  | 4.386  | 3.999  | 4.947  | 5.429  | 211347    | PANK3    | NM_145962_11_+1 |
| Ap1ar         | 4.160  | 4.417  | 4.752  | 4.966  | 4.469  | 4.675  | 4.322  | 4.887  | 4.749  | 4.856  | 211556    | AP1AR    | NM_145964_3_-1  |
| Gphn          | 3.700  | 4.053  | 3.649  | 3.591  | 3.723  | 3.462  | 3.737  | 3.419  | 2.979  | 2.737  | 268566    | GPHN     | NM_145965_12_+1 |
| Tagap         | 7.137  | 7.188  | 6.136  | 6.242  | 8.952  | 9.271  | 7.328  | 6.973  | 5.579  | 5.529  | 72536     | TAGAP    | NM_145968_17_+1 |
| Dennd6a       | 2.590  | 3.300  | 4.306  | 4.364  | 5.039  | 4.742  | 4.884  | 4.606  | 4.356  | 4.690  | 211922    | DENND6A  | NM_145969_14_+1 |
| Cc2d1a        | 4.049  | 4.073  | 3.612  | 3.848  | 3.792  | 3.949  | 3.720  | 3.852  | 3.797  | 4.387  | 212139    | CC2D1A   | NM_145970_8_-1  |
| Nepro         | 2.523  | 2.676  | 3.381  | 2.570  | 2.869  | 2.575  | 2.813  | 2.401  | 3.314  | 3.236  | 212547    | NEPRO    | NM_145972_16_+1 |
| Ell3          | 0.215  | -0.773 | 1.025  | 1.679  | -1.301 | 2.095  | 0.577  | 3.888  | -1.232 | -0.305 | 269344    | ELL3     | NM_145973_2_-1  |
| N4bp3         | 6.439  | 6.191  | 2.268  | 2.521  | 4.431  | 4.478  | 4.108  | 3.240  | 0.476  | 1.773  | 212706    | N4BP3    | NM_145974_11_-1 |
| Tifab         | 4.147  | 2.630  | 5.125  | 5.382  | 3.004  | 3.635  | 4.279  | 4.942  | 5.647  | 6.118  | 212937    | TIFAB    | NM_145977_13_-1 |
| Slc45a3       | -3.266 | -3.536 | -3.899 | -4.312 | -4.272 | -4.776 | -3.779 | -4.539 | -4.050 | -4.352 | 212980    | SLC45A3  | NM_145977_1_+1  |
| Pdlim2        | 6.059  | 6.008  | 4.687  | 4.671  | 4.499  | 4.907  | 4.709  | 4.535  | 3.934  | 4.302  | 213019    | PDILIM2  | NM_145978_14_-1 |
| Chd4          | 4.952  | 5.082  | 5.860  | 6.201  | 5.753  | 5.892  | 5.900  | 6.091  | 5.775  | 6.447  | 107932    | CHD4     | NM_145979_6_+1  |
| 8430408G22Rik | -1.965 | -0.811 | -0.941 | -0.497 | 0.407  | 0.458  | -0.066 | 0.430  | 0.155  | 2.491  | 213393    | C10orf10 | NM_145980_6_+1  |
| Phyhip        | -4.981 | -4.981 | -4.988 | -2.303 | -4.665 | -2.452 | -2.710 | -2.162 | -4.394 | -4.227 | 105653    | PHYHIP   | NM_145981_14_+1 |
| Prepl         | -4.176 | -3.591 | -3.888 | -4.724 | -4.618 | -4.891 | -2.598 | -2.823 | -4.663 | -4.768 | 213760    | PREPL    | NM_145984_17_-1 |
| Arcn1         | 6.561  | 6.597  | 7.317  | 7.364  | 7.113  | 7.087  | 7.097  | 7.265  | 7.882  | 8.185  | 213827    | ARCN1    | NM_145985_9_-1  |
| Fam83f        | 3.634  | 3.296  | -1.243 | -0.799 | -2.049 | -1.935 | 0.198  | 0.169  | 2.604  | 2.443  | 213956    | FAM83F   | NM_145986_15_+1 |
| Tmem82        | -4.981 | -4.981 | -2.619 | -2.373 | -2.755 | -2.808 | -2.846 | -2.287 | -2.682 | -3.619 | 213989    | TMEM82   | NM_145987_4_-1  |
| Cdk5rap2      | 3.495  | 3.236  | 3.187  | 3.199  | 4.133  | 4.211  | 3.535  | 3.684  | 2.529  | 2.618  | 214444    | CDK5RAP2 | NM_145990_4_-1  |
| Cdc73         | 4.289  | 4.496  | 4.599  | 4.754  | 4.676  | 4.676  | 4.537  | 4.654  | 4.605  | 4.863  | 214498    | CDC73    | NM_145991_1_-1  |
| L3mbtl2       | 3.683  | 3.517  | 3.653  | 3.659  | 4.027  | 4.053  | 4.159  | 3.948  | 4.479  | 4.056  | 214669    | L3MBTL2  | NM_145993_15_+1 |
| Abi1          | -1.077 | -1.121 | -2.760 | -1.567 | -1.680 | -4.913 | -1.477 | -2.503 | 0.141  | -1.333 | 11308     | ABI1     | NM_145994_2_-1  |
| Arid5a        | 3.453  | 3.876  | -0.079 | 0.623  | 0.919  | 1.079  | 2.151  | 2.095  | 2.974  | 2.051  | 214855    | ARID5A   | NM_145996_1_+1  |
| Kdm5a         | 5.900  | 5.834  | 6.561  | 6.427  | 6.407  | 6.484  | 6.157  | 6.236  | 6.105  | 6.187  | 214899    | KDM5A    | NM_145997_6_+1  |
| Rhot2         | 3.366  | 3.508  | 3.423  | 3.311  | 3.439  | 3.332  | 3.227  | 2.997  | 3.577  | 3.340  | 214952    | RHOT2    | NM_145999_17_-1 |
| Bud13         | 3.205  | 3.321  | 3.436  | 3.422  | 3.665  | 3.486  | 3.478  | 3.242  | 3.795  | 3.597  | 215051    | BUD13    | NM_146000_9_+1  |
| Hip1          | 2.915  | 3.622  | 1.967  | 4.118  | 1.586  | 3.052  | 4.474  | 0.536  | 6.588  | 6.601  | 215114    | HIP1     | NM_146001_5_-1  |
| Rhbdd2        | 4.004  | 4.327  | 3.705  | 4.337  | 4.245  | 4.793  | 3.551  | 3.916  | 2.716  | 2.354  | 215160    | RHBDD2   | NM_146002_5_+1  |
| Senp6         | 5.684  | 5.822  | 5.249  | 4.932  | 5.626  | 5.665  | 5.635  | 4.944  | 4.774  | 4.656  | 215351    | SENP6    | NM_146003_9_+1  |
| Mfsd6l        | -4.981 | -4.981 | -4.966 | -3.599 | -1.823 | -2.923 | -3.806 | -2.238 | 0.146  | -1.148 | 215723    | MFSD6L   | NM_146004_11_+1 |
| Lss           | 4.403  | 4.519  | 3.377  | 3.169  | 2.742  | 2.759  | 2.741  | 2.759  | 2.660  | 2.753  | 16987     | LSS      | NM_146006_10_+1 |
| Tcp11l2       | 5.549  | 5.660  | 4.129  | 4.112  | 4.457  | 4.806  | 5.612  | 6.231  | 7.153  | 7.266  | 216198    | TCP11L2  | NM_146008_10_+1 |
| Cep290        | 4.639  | 5.355  | 3.836  | 5.716  | 3.854  | 4.835  | 3.260  | 3.886  | 2.491  | 2.336  | 216274    | CEP290   | NM_146009_10_+1 |
| Tspan8        | -4.889 | -1.179 | -4.141 | 0.302  | -2.614 | -0.076 | -4.919 | -0.076 | -4.961 | -2.047 | 216350    | TSPAN8   | NM_146010_10_+1 |
| Arhgap9       | 6.876  | 6.898  | 6.076  | 6.065  | 7.121  | 6.894  | 7.842  | 7.846  | 8.569  | 8.583  | 216445    | ARHGAP9  | NM_146011_10_+1 |
| Ctdsp2        | 3.658  | 3.608  | 4.275  | 4.539  | 3.857  | 3.891  | 4.754  | 4.765  | 5.079  | 5.345  | 52468     | CTDSP2   | NM_146012_10_+1 |
| Sec14l4       | -4.981 | -4.981 | -2.698 | -3.422 | -4.983 | -4.366 | -4.883 | -3.841 | -4.981 | -4.981 | 103655    | SEC14L4  | NM_146013_11_+1 |
| Ccm2          | 6.301  | 6.042  | 6.435  | 6.230  | 6.117  | 5.975  | 6.333  | 6.118  | 6.586  | 6.222  | 216527    | CCM2     | NM_146014_11_+1 |
| Eml6          | 1.227  | 1.168  | 3.129  | 2.745  | 1.620  | 1.109  | 1.871  | 1.315  | 2.524  | 1.631  | 237711    | EML6     | NM_146016_11_-1 |
| Fln           | 3.948  | 3.889  | 3.463  | 3.339  | 3.755  | 3.690  | 3.997  | 4.027  | 5.706  | 5.146  | 216805    | FLCN     | NM_146018_11_-1 |
| Chd3          | 3.798  | 3.655  | 5.340  | 5.445  | 6.329  | 6.481  | 5.882  | 5.615  | 3.449  | 3.557  | 216848    | CHD3     | NM_146019_11_-1 |
| Gltpd2        | -4.981 | -4.981 | -4.981 | -4.981 | -4.993 | -4.136 | -4.981 | -4.981 | -4.981 | -4.981 | 216871    | GLTPD2   | NM_146020_11_+1 |
| Gm21975       | 5.536  | 5.898  | 5.846  | 5.948  | 5.992  | 6.317  | 5.446  | 5.945  | 6.153  | 6.645  | 101488212 | EV12B    | NM_146023_11_-1 |
| Ankrd40       | -2.093 | -2.265 | -2.120 | -2.170 | -1.795 | -2.281 | -1.982 | -3.709 | -1.362 | -0.551 | 71452     | ANKRD40  | NM_146024_11_+1 |
| Samd14        | -1.949 | -1.346 | -2.661 | 0.146  | 0.448  | 1.106  | -1.332 | 0.536  | -1.255 | 0.689  | 217125    | SAMD14   | NM_146025_11_+1 |
| Prr15l        | -4.981 | -4.981 | -3.999 | -2.603 | -1.179 | -2.019 | -3.376 | -3.846 | -2.839 | -3.498 | 217138    | PRR15L   | NM_146026_11_+1 |
| Scrn2         | 2.733  | 2.310  | 2.030  | 2.005  | 2.438  | 2.707  | 1.464  | 1.249  | -0.783 | -1.696 | 217140    | SCRN2    | NM_146027_11_+1 |
| Stac2         | 1.076  | 0.204  | -4.256 | -3.133 | -3.775 | -2.902 | -1.850 | -0.153 | -1.278 | -0.826 | 217154    | STAC2    | NM_146028_11_-1 |

|               |          |        |        |        |        |        |        |        |        |        |        |        |          |                  |
|---------------|----------|--------|--------|--------|--------|--------|--------|--------|--------|--------|--------|--------|----------|------------------|
|               | Plekhh3  | -2.494 | -0.976 | -4.708 | -1.684 | -2.768 | -1.619 | -1.129 | 0.663  | 2.536  | 3.414  | 217198 | PLEKHH3  | NM_146030_11_-_1 |
|               | Srp68    | 6.062  | 6.095  | 5.611  | 5.882  | 5.710  | 5.706  | 5.738  | 5.950  | 5.856  | 5.743  | 217337 | SRP68    | NM_146032_11_-_1 |
|               | Ankmy2   | 5.619  | 5.523  | 5.143  | 5.072  | 4.877  | 4.895  | 4.535  | 4.547  | 4.025  | 4.272  | 217473 | ANKMY2   | NM_146033_12_+_1 |
|               | Mia2     | 5.607  | 5.495  | 5.853  | 5.946  | 5.751  | 5.810  | 5.641  | 5.811  | 6.658  | 6.614  | 338320 | MIA2     | NM_146034_12_+_1 |
|               | Mgat2    | 6.750  | 6.368  | 6.721  | 6.658  | 5.961  | 5.814  | 6.460  | 6.475  | 6.691  | 6.952  | 217664 | MGAT2    | NM_146035_12_+_1 |
|               | Ahsa1    | 6.630  | 6.713  | 6.629  | 6.566  | 6.571  | 6.553  | 6.471  | 6.493  | 6.289  | 6.116  | 217737 | AHSA1    | NM_146036_12_+_1 |
|               | Kcnk13   | -1.580 | -2.449 | -1.755 | -0.795 | -1.036 | -1.647 | -0.495 | -0.935 | -0.901 | -0.128 | 217826 | KCNK13   | NM_146037_12_+_1 |
|               | Wdr60    | 2.150  | 2.360  | 0.177  | 0.939  | 0.453  | 1.270  | -0.738 | 1.028  | -4.394 | 0.603  | 217935 | WDR60    | NM_146039_12_-_1 |
|               | Cdca7l   | 4.713  | 4.484  | 5.418  | 5.017  | 5.134  | 5.027  | 4.687  | 4.158  | 3.241  | 2.578  | 217946 | CDCA7L   | NM_146040_12_+_1 |
|               | Gmds     | 4.742  | 4.920  | 3.696  | 4.201  | 2.511  | 2.901  | 2.301  | 3.175  | 2.381  | 2.434  | 218138 | GMDS     | NM_146041_13_-_1 |
|               | Rnf144b  | -2.507 | -1.680 | 0.942  | 0.164  | -0.720 | -0.555 | -3.546 | -2.058 | -4.161 | -2.941 | 218215 | RNF144B  | NM_146042_13_+_1 |
|               | Spin1    | 6.420  | 6.480  | 4.791  | 4.617  | 4.779  | 4.717  | 4.775  | 5.008  | 4.779  | 5.278  | 20729  | SPIN1    | NM_146043_13_+_1 |
|               | B4gal7   | 3.246  | 3.295  | 2.630  | 2.327  | 2.641  | 2.568  | 2.816  | 3.379  | 3.669  | 3.673  | 218271 | B4GALT7  | NM_146045_13_+_1 |
|               | Clptm1l  | 7.118  | 7.325  | 7.300  | 7.509  | 7.154  | 7.451  | 6.973  | 7.274  | 7.352  | 7.275  | 218335 | CLPTM1L  | NM_146047_13_+_1 |
|               | Oit1     | -4.981 | -4.981 | -2.507 | -1.871 | 0.150  | 3.648  | -2.219 | -1.331 | -4.981 | -4.981 | 18300  | FAM3D    | NM_146050_14_-_1 |
| 3830406C13Rik |          | 3.438  | 2.319  | 2.792  | 2.296  | 2.173  | 2.322  | 2.401  | 2.072  | 2.349  | 1.980  | 218734 | C3orf14  | NM_146051_14_+_1 |
|               | Lrrc3b   | -4.981 | -4.981 | -4.981 | -4.981 | -4.338 | -3.808 | -4.960 | -1.832 | -4.981 | -4.981 | 218763 | LRRC3B   | NM_146052_14_-_1 |
|               | Fermt2   | -2.164 | -3.315 | -3.256 | -3.425 | -3.874 | -4.068 | -4.955 | -3.300 | -4.981 | -4.981 | 218952 | FERMT2   | NM_146054_14_-_1 |
|               | Ccar2    | 3.710  | 3.856  | 4.508  | 4.483  | 4.649  | 4.423  | 4.190  | 4.464  | 5.044  | 4.530  | 219158 | CCAR2    | NM_146055_14_-_1 |
|               | Dap      | 9.361  | 9.824  | 6.036  | 6.552  | 5.634  | 5.324  | 6.505  | 6.557  | 6.422  | 6.545  | 223453 | DAP      | NM_146057_15_+_1 |
|               | Ccdc166  | 1.306  | 2.144  | 1.204  | 1.253  | 1.558  | 1.035  | 1.372  | 0.090  | 1.391  | 1.224  | 223648 | CCDC166  | NM_146059_15_-_1 |
|               | Prr5     | 6.382  | 5.893  | 5.208  | 4.518  | 3.421  | 2.787  | 2.866  | 3.710  | 2.249  | 2.079  | 109270 | PRR5     | NM_146061_15_+_1 |
|               | Pphln1   | 2.970  | 3.027  | 3.666  | 3.201  | 3.180  | 2.598  | 3.553  | 2.635  | 3.494  | 2.947  | 223828 | PPHLN1   | NM_146062_15_+_1 |
|               | Soat2    | 1.366  | 0.108  | 0.219  | 0.386  | 2.507  | 2.658  | 1.008  | 0.928  | 0.450  | -0.154 | 223920 | SOAT2    | NM_146064_15_+_1 |
|               | Gspt1    | 5.630  | 5.495  | 5.477  | 5.604  | 5.152  | 5.201  | 5.419  | 5.402  | 4.576  | 5.156  | 14852  | GSPT1    | NM_146066_16_-_1 |
|               | Cpped1   | 4.408  | 4.504  | 3.959  | 4.370  | 3.143  | 3.086  | 3.297  | 3.679  | 4.260  | 4.275  | 223978 | CPPED1   | NM_146067_16_-_1 |
|               | Spidr    | 3.174  | 3.807  | 2.926  | 3.008  | 3.655  | 3.403  | 3.772  | 3.739  | 4.478  | 4.862  | 224008 | SPIDR    | NM_146068_16_-_1 |
|               | Nrros    | 7.088  | 6.378  | 7.447  | 7.452  | 9.296  | 9.431  | 8.791  | 8.950  | 9.449  | 9.678  | 224109 | NRR0S    | NM_146069_16_-_1 |
|               | Muc20    | -4.981 | -4.981 | -4.859 | -3.257 | -4.958 | -4.909 | -2.601 | 2.607  | -4.981 | -4.981 | 224116 | MUC20    | NM_146071_16_-_1 |
|               | Zdhhc14  | 5.450  | 5.898  | 3.644  | 4.803  | 1.835  | 3.937  | 1.578  | 3.478  | 1.353  | 3.311  | 224454 | ZDHHC14  | NM_146073_17_+_1 |
|               | Tfb1m    | 4.027  | 4.226  | 2.824  | 3.230  | 3.115  | 3.350  | 2.888  | 2.990  | 1.412  | 2.056  | 224481 | TFB1M    | NM_146074_17_-_1 |
|               | Lemd2    | 5.119  | 5.294  | 5.565  | 5.632  | 5.672  | 5.848  | 5.980  | 6.021  | 6.374  | 6.447  | 224640 | LEM2     | NM_146075_17_-_1 |
|               | Ubr2     | 4.698  | 3.913  | 4.164  | 3.902  | 4.338  | 3.269  | 4.537  | 4.079  | 4.985  | 4.016  | 224826 | UBR2     | NM_146078_17_-_1 |
|               | Guca1b   | -1.391 | -4.981 | -1.143 | -4.973 | -1.180 | -4.927 | -1.621 | -4.960 | -2.121 | -4.981 | 107477 | GUCA1B   | NM_146079_17_+_1 |
|               | Ppp4r1   | -1.692 | 0.280  | 0.766  | 2.365  | 1.378  | 0.438  | 1.435  | 0.662  | 4.370  | 4.366  | 70351  | PPP4R1   | NM_146081_17_+_1 |
|               | Srsf7    | 5.982  | 6.097  | 6.409  | 6.523  | 6.707  | 6.570  | 6.182  | 6.097  | 3.967  | 5.006  | 225027 | SRSF7    | NM_146083_17_-_1 |
|               | Fam13b   | 3.539  | 3.990  | 4.736  | 4.919  | 4.917  | 5.535  | 4.694  | 4.781  | 4.885  | 5.079  | 225358 | FAM13B   | NM_146084_18_-_1 |
|               | Apbb3    | 2.768  | 3.395  | 2.827  | 2.573  | 3.634  | 3.575  | 2.920  | 3.100  | 2.955  | 2.801  | 225372 | APBB3    | NM_146085_18_-_1 |
|               | Csnk1a1  | 7.418  | 7.305  | 7.436  | 7.269  | 7.120  | 7.046  | 7.133  | 7.030  | 7.405  | 7.238  | 93687  | CSNK1A1  | NM_146087_18_+_1 |
|               | Haus1    | 3.951  | 4.025  | 3.938  | 3.860  | 4.272  | 3.941  | 3.823  | 3.746  | 2.235  | 1.621  | 225745 | HAUS1    | NM_146089_18_-_1 |
|               | Zadh2    | 2.286  | 2.133  | 3.993  | 3.695  | 2.845  | 2.379  | 3.012  | 2.656  | 4.212  | 2.868  | 225791 | ZADH2    | NM_146090_18_+_1 |
|               | Atl3     | 3.595  | 3.423  | 3.649  | 3.791  | 3.726  | 3.378  | 3.645  | 2.840  | 3.340  | 3.830  | 109168 | ATL3     | NM_146091_19_+_1 |
|               | Taf6l    | 4.339  | 3.934  | 4.132  | 4.474  | 3.450  | 3.481  | 3.232  | 3.164  | 3.132  | 3.243  | 225895 | TAF6L    | NM_146092_19_-_1 |
|               | Ubxn1    | 6.673  | 6.698  | 6.363  | 6.436  | 6.489  | 6.384  | 6.561  | 6.343  | 6.010  | 5.680  | 225896 | UBXN1    | NM_146093_19_+_1 |
|               | Fads1    | 4.871  | 4.596  | 5.256  | 5.160  | 2.535  | 2.135  | 3.360  | 3.628  | 1.504  | 2.175  | 76267  | FADS1    | NM_146094_19_+_1 |
|               | Abhd17b  | 7.669  | 8.244  | 5.281  | 5.084  | 4.932  | 4.852  | 4.897  | 5.163  | 5.209  | 5.352  | 226016 | ABHD17B  | NM_146096_19_+_1 |
|               | Cbwd1    | 2.897  | 2.231  | 2.929  | 2.819  | 1.904  | 2.121  | 1.534  | 1.419  | 1.502  | 1.103  | 226043 | CBWD1    | NM_146097_19_-_1 |
|               | Wbp1l    | 3.884  | 3.613  | 3.667  | 3.103  | 4.143  | 4.262  | 3.638  | 3.816  | 4.837  | 3.759  | 226178 | WBP1L    | NM_146099_19_+_1 |
|               | Afap1l2  | -4.064 | -4.981 | -4.943 | -4.984 | -4.981 | -4.980 | -4.919 | -4.978 | -4.981 | -4.981 | 226250 | AFAP1L2  | NM_146102_19_-_1 |
| Tmem185b      |          | 4.430  | 4.638  | 4.829  | 4.655  | 5.373  | 5.502  | 5.444  | 5.375  | 6.005  | 5.825  | 226351 | TMEM185B | NM_146103_1_+_1  |
|               | Aph1a    | 5.181  | 4.805  | 5.060  | 5.386  | 4.649  | 4.741  | 4.826  | 5.028  | 5.483  | 5.602  | 226548 | APH1A    | NM_146104_3_+_1  |
|               | Cnst     | 2.524  | 2.679  | 3.289  | 3.228  | 3.093  | 3.163  | 3.858  | 3.623  | 4.904  | 4.526  | 226744 | CNST     | NM_146105_1_+_1  |
|               | Lyplal1  | 1.735  | 3.662  | -1.327 | 2.531  | -1.505 | 3.229  | -0.959 | 2.532  | -2.086 | 3.114  | 226791 | LYPLAL1  | NM_146106_1_-_1  |
|               | Actr1b   | 4.701  | 4.391  | 4.924  | 4.905  | 6.757  | 6.728  | 5.492  | 5.126  | 5.406  | 5.009  | 226977 | ACTR1B   | NM_146107_1_-_1  |
|               | Hibch    | 4.005  | 4.132  | 3.663  | 3.842  | 3.658  | 3.859  | 3.658  | 3.448  | 3.781  | 4.003  | 227095 | HIBCH    | NM_146108_1_+_1  |
|               | Als2     | 0.993  | 1.001  | 2.368  | 2.247  | 0.912  | 0.306  | 0.965  | 0.197  | 1.785  | 0.926  | 74018  | ALS2     | NM_146109_1_-_1  |
|               | Aamp     | 6.770  | 6.772  | 7.164  | 7.230  | 7.043  | 7.018  | 6.927  | 6.936  | 6.890  | 6.845  | 227290 | AAMP     | NM_146110_1_-_1  |
|               | Gigyf2   | 3.863  | 3.867  | 4.022  | 4.075  | 4.077  | 3.941  | 3.992  | 4.086  | 4.395  | 4.456  | 227331 | GIGYF2   | NM_146112_1_+_1  |
|               | Dclre1c  | 5.967  | 6.569  | 4.431  | 4.261  | 5.139  | 5.398  | 4.660  | 4.569  | 4.659  | 4.435  | 227525 | DCLRE1C  | NM_146114_2_+_1  |
|               | Tor4a    | 4.966  | 4.835  | 5.977  | 6.028  | 5.869  | 6.224  | 5.925  | 6.127  | 6.802  | 6.841  | 227612 | TOR4A    | NM_146115_2_-_1  |
|               | Tubb4b   | 6.931  | 7.084  | 6.511  | 7.054  | 6.642  | 6.893  | 6.546  | 6.930  | 6.096  | 5.426  | 227613 | TUBB4B   | NM_146116_2_-_1  |
|               | Slc25a25 | -4.366 | -4.413 | -4.064 | -2.382 | -3.185 | -3.418 | -1.611 | -4.752 | -4.357 | -4.737 | 227731 | SLC25A25 | NM_146118_2_-_1  |
|               | Fam129b  | 0.522  | 0.783  | 0.982  | 0.323  | 2.181  | 0.591  | 3.352  | 4.084  | 6.770  | 6.554  | 227737 | FAM129B  | NM_146119_2_+_1  |
|               | Gsn      | -4.072 | 1.064  | -0.131 | 0.449  | -0.579 | -0.117 | 0.029  | -0.553 | -0.637 | 0.200  | 227753 | GSN      | NM_146120_2_+_1  |
|               | Rabgap1  | 4.063  | 4.085  | 4.573  | 4.590  | 4.736  | 4.647  | 4.515  | 4.545  | 5.018  | 4.902  | 227800 | RABGAP1  | NM_146121_2_+_1  |
|               | Dennd1a  | 2.569  | 2.245  | 3.021  | 3.099  | 3.684  | 3.847  | 3.959  | 4.188  | 5.502  | 5.471  | 227801 | DENND1A  | NM_146122_2_-_1  |
|               | Cacnb4   | 0.043  | -2.755 | -3.843 | -4.311 | 0.603  | 0.564  | -1.543 | -2.150 | -4.153 | -1.532 | 12298  | CACNB4   | NM_146123_2_-_1  |
|               | Arhgap1  | -4.302 | -4.027 | -2.697 | -1.107 | -1.422 | -2.430 | 0.164  | -1.942 | -1.547 | 0.955  | 228359 | ARHGAP1  | NM_146124_2_+_1  |
|               | Itpka    | 0.612  | 0.820  | -1.557 | -3.463 | -3.359 | -3.526 | -1.726 | -3.955 | -1.510 | -4.227 | 228550 | ITPKA    | NM_146125_2_+_1  |
|               | Sord     | 3.345  | 4.174  | 3.914  | 4.641  | 4.166  | 4.549  | 4.210  | 4.894  | 5.189  | 6.046  | 20322  | SORD     | NM_146126_2_+_1  |
|               | Fam110a  | 3.952  | 2.166  | 2.389  | 1.878  | 2.189  | 0.770  | 1.849  | 1.978  | 3.170  | 3.478  | 73847  | FAM110A  | NM_146127_2_-_1  |
|               | Dlgap4   | -4.981 | -4.981 | -4.970 | -4.970 | -4.981 | -4.981 | -4.981 | -4.981 | -4.981 | -4.981 | 228836 | DLGAP4   | NM_146128_2_+_1  |
|               | Pcif1    | 5.083  | 5.212  | 5.285  | 5.128  | 5.872  | 5.613  | 5.860  | 5.785  | 6.575  | 6.130  | 228866 | PCIF1    | NM_146129_2_+_1  |
|               | Hnrnpa3  | 5.918  | 5.353  | 5.843  | 5.533  | 5.675  | 5.762  | 5.757  | 5.127  | 4.499  | 4.872  | 229279 | NA       | NM_146130_2_+_1  |

|          |        |        |        |        |        |        |        |        |        |        |        |          |                 |
|----------|--------|--------|--------|--------|--------|--------|--------|--------|--------|--------|--------|----------|-----------------|
| Pbxip1   | 6.435  | 6.745  | 6.100  | 5.917  | 7.283  | 7.871  | 7.309  | 7.122  | 7.315  | 7.292  | 229534 | PBXIP1   | NM_146131_3_+1  |
| Golph3l  | 5.036  | 5.366  | 5.163  | 5.334  | 5.070  | 5.183  | 5.410  | 5.609  | 5.881  | 6.087  | 229593 | GOLPH3L  | NM_146133_3_+1  |
| Aph1a    | 3.803  | 3.891  | 3.000  | 3.247  | 2.303  | 2.636  | 2.765  | 2.985  | 3.313  | 3.643  | 226548 | APH1A    | NM_146134_3_+1  |
| Pias3    | -1.507 | 0.630  | 0.899  | 1.479  | 0.810  | 1.850  | 1.822  | 2.625  | 3.687  | 3.378  | 229615 | PIAS3    | NM_146135_3_+1  |
| Slc16a4  | -2.388 | -4.981 | -3.606 | -4.642 | -4.020 | -4.098 | -3.117 | -4.955 | -1.654 | -2.148 | 229699 | SLC16A4  | NM_146136_3_+1  |
| Amigo1   | -0.267 | -0.542 | 0.613  | 0.233  | 0.903  | 0.810  | 0.155  | 0.437  | 0.744  | 1.039  | 229715 | AMIGO1   | NM_146137_3_+1  |
| Vav3     | -4.926 | -4.101 | -3.745 | -4.049 | -4.221 | -4.856 | -4.511 | -4.954 | -2.899 | -1.923 | 57257  | VAV3     | NM_146139_3_+1  |
| Ppa2     | 6.507  | 6.300  | 5.434  | 5.515  | 5.261  | 5.239  | 5.203  | 5.295  | 4.726  | 4.858  | 74776  | PPA2     | NM_146141_3_+1  |
| Tdrd7    | 2.799  | 3.253  | 4.844  | 4.349  | 4.953  | 4.591  | 5.391  | 5.218  | 6.852  | 6.895  | 100121 | TDRD7    | NM_146142_4_+1  |
| Usp1     | 3.513  | 3.278  | 3.063  | 3.452  | 4.319  | 3.900  | 4.166  | 4.046  | 3.601  | 4.045  | 230484 | USP1     | NM_146144_4_+1  |
| Jak1     | 6.585  | 6.663  | 7.343  | 7.294  | 7.681  | 7.652  | 7.781  | 7.923  | 8.331  | 8.494  | 16451  | JAK1     | NM_146145_4_-1  |
| Lepr     | -4.981 | -4.981 | -4.981 | -4.981 | -4.981 | -4.981 | -4.981 | -4.981 | -4.981 | -4.981 | 16847  | LEPR     | NM_146146_4_+1  |
| C8a      | 0.985  | 0.113  | -4.981 | -4.981 | -4.981 | -4.981 | -4.977 | -4.904 | -4.981 | -4.810 | 230558 | C8A      | NM_146148_4_-1  |
| Fam151a  | -4.981 | -4.981 | -4.527 | -4.973 | -4.871 | -4.268 | -4.981 | -4.981 | -4.981 | -4.981 | 230579 | FAM151A  | NM_146149_4_+1  |
| Nrd1     | 6.038  | 6.056  | 6.623  | 6.658  | 6.800  | 6.835  | 6.655  | 6.695  | 7.058  | 7.005  | 230598 | NRDC     | NM_146150_4_+1  |
| Tesk2    | 2.402  | 3.067  | 2.006  | 1.824  | 3.300  | 2.836  | 3.290  | 3.134  | 4.593  | 4.869  | 230661 | TESK2    | NM_146151_4_+1  |
| Ipo13    | 2.546  | 2.855  | 3.459  | 3.573  | 3.550  | 3.490  | 3.559  | 3.461  | 3.942  | 4.070  | 230673 | IP013    | NM_146152_4_-1  |
| Thrap3   | 5.187  | 5.081  | 6.301  | 6.078  | 6.487  | 6.275  | 6.222  | 5.732  | 6.152  | 5.784  | 230753 | THRAP3   | NM_146153_4_-1  |
| Ppp1r8   | 4.122  | 4.258  | 4.723  | 4.693  | 4.661  | 4.659  | 4.533  | 4.330  | 4.422  | 4.136  | 100336 | PPP1R8   | NM_146154_4_-1  |
| Ahdcl    | 1.777  | 1.545  | -0.817 | -0.893 | -0.880 | -0.530 | -0.156 | -0.017 | 0.946  | 0.415  | 230793 | AHDC1    | NM_146155_4_+1  |
| Pdik1l   | -3.575 | 0.170  | 0.807  | -1.385 | -0.133 | -0.787 | -3.184 | -2.648 | -1.110 | 1.018  | 230809 | PDIK1L   | NM_146156_4_-1  |
| Emc1     | -0.356 | 2.902  | -0.372 | 0.560  | -0.756 | -0.864 | -0.270 | -3.492 | -2.804 | -2.652 | 230866 | EMC1     | NM_146157_4_+1  |
| Haus3    | 6.122  | 5.524  | 3.991  | 4.259  | 4.385  | 4.158  | 4.452  | 4.439  | 3.295  | 3.511  | 231123 | HAUS3    | NM_146159_5_-1  |
| Arhgap24 | -4.872 | -4.981 | -4.905 | -4.975 | -4.566 | -4.964 | -4.529 | -4.952 | -4.638 | -4.799 | 231532 | ARHGAP24 | NM_146161_5_+1  |
| Tmem119  | 0.981  | 2.356  | -2.880 | -2.587 | -0.755 | -2.451 | 1.231  | 0.096  | 3.163  | 1.314  | 231633 | TMEM119  | NM_146162_5_-1  |
| Lrch4    | -4.829 | -4.867 | -4.852 | -4.893 | -4.959 | -4.979 | -4.837 | -4.903 | -4.832 | -4.967 | 231798 | LRCH4    | NM_146164_5_+1  |
| Aimp2    | 1.741  | 3.519  | 1.951  | 3.376  | 1.973  | 2.890  | 1.312  | 2.461  | 1.565  | 2.382  | 231872 | AIMP2    | NM_146165_5_-1  |
| Gimap7   | 1.341  | -4.981 | -1.955 | -0.061 | -1.415 | 0.341  | 0.750  | 2.599  | -1.633 | -3.233 | 231932 | GIMAP7   | NM_146167_6_+1  |
| Vopp1    | 4.726  | 4.859  | 4.577  | 4.310  | 6.268  | 6.614  | 6.258  | 5.995  | 5.607  | 5.831  | 232023 | VOPP1    | NM_146168_6_-1  |
| Paip2b   | 3.051  | 3.128  | 3.847  | 3.398  | 3.117  | 2.536  | 2.981  | 2.608  | 1.123  | 1.761  | 232164 | PAIP2B   | NM_146169_6_-1  |
| C87436   | 1.096  | 1.233  | 0.930  | 1.753  | 1.484  | 1.091  | 1.586  | 1.566  | 2.845  | 3.164  | 232196 | C2orf42  | NM_146170_6_+1  |
| Ncapd2   | 2.296  | 0.891  | 3.618  | 3.387  | 4.904  | 3.887  | 4.046  | 3.313  | 3.173  | 2.122  | 68298  | NCAPD2   | NM_146171_6_-1  |
| Tspan33  | -0.445 | 0.403  | 5.901  | 6.407  | 4.937  | 5.143  | 5.277  | 5.495  | 1.858  | 2.228  | 232670 | TSPAN33  | NM_146173_6_+1  |
| Zfp282   | 2.713  | 2.475  | 4.565  | 4.641  | 2.886  | 3.137  | 3.094  | 3.386  | 3.465  | 3.955  | 101095 | ZNF282   | NM_146175_6_+1  |
| Cnot3    | 3.607  | 3.569  | 4.180  | 4.061  | 4.687  | 4.412  | 4.524  | 4.553  | 5.303  | 5.312  | 232791 | CNOT3    | NM_146176_7_+1  |
| Kmt5c    | 3.565  | 2.831  | 4.548  | 3.770  | 4.689  | 4.857  | 4.448  | 4.777  | 5.093  | 5.100  | 232811 | KMT5C    | NM_146177_7_+1  |
| Ccdc106  | -4.981 | -4.981 | -4.981 | -4.981 | -4.855 | -4.974 | -4.954 | -4.366 | -3.462 | -4.981 | 232821 | CCDC106  | NM_146178_7_+1  |
| Zfp418   | 0.022  | 0.888  | -0.732 | -1.020 | -0.585 | -0.422 | 0.521  | 0.054  | 0.060  | 1.097  | 232854 | ZNF416   | NM_146179_7_+1  |
| Klc3     | -3.119 | -2.634 | -2.952 | -4.187 | -4.327 | -4.802 | -4.421 | -4.693 | -4.981 | -4.981 | 232943 | KLC3     | NM_146182_7_-1  |
| Zfp428   | 0.901  | 0.927  | -1.030 | -1.260 | -0.367 | 0.064  | -0.843 | -1.579 | -2.322 | -4.954 | 232969 | ZNF428   | NM_146183_7_+1  |
| B3gnt8   | 5.658  | 5.285  | -0.057 | -0.854 | 2.255  | 2.254  | 2.661  | 3.129  | 5.008  | 4.320  | 232984 | B3GNT8   | NM_146184_7_+1  |
| Zfp790   | 2.562  | 2.780  | 2.190  | 2.501  | 2.680  | 2.379  | 3.326  | 3.134  | 3.525  | 3.815  | 233056 | ZNF790   | NM_146185_7_+1  |
| Wdr62    | -0.740 | -0.912 | 1.838  | 0.935  | 1.270  | 0.896  | 1.455  | 1.027  | 2.839  | 2.127  | 233064 | WDR62    | NM_146186_7_-1  |
| Ffar2    | -4.957 | -4.981 | 2.866  | 2.802  | 6.538  | 6.666  | 4.962  | 3.240  | 0.073  | -4.978 | 233079 | FFAR2    | NM_146187_7_-1  |
| Kctd15   | -3.349 | -1.910 | -4.981 | -4.981 | -4.845 | -2.092 | -4.970 | -2.969 | -4.981 | -4.981 | 233107 | KCTD15   | NM_146188_7_-1  |
| Mybpc2   | -0.842 | 0.543  | -4.960 | -3.210 | -1.219 | -2.766 | -2.570 | -4.873 | -4.981 | -4.981 | 233199 | MYBPC2   | NM_146189_7_-1  |
| Tubgcp5  | 7.232  | 8.058  | 4.371  | 4.475  | 4.474  | 4.543  | 4.342  | 4.547  | 4.099  | 4.401  | 233276 | TUBGCP5  | NM_146190_7_+1  |
| Lrrk1    | 5.193  | 4.780  | 6.817  | 6.872  | 7.254  | 7.202  | 6.803  | 6.406  | 5.592  | 5.954  | 233328 | LRRK1    | NM_146191_7_-1  |
| Btbd1    | 5.659  | 5.788  | 6.341  | 6.438  | 5.535  | 5.609  | 5.801  | 5.960  | 5.832  | 6.071  | 83962  | BTBD1    | NM_146193_7_-1  |
| Picalm   | -1.718 | 0.776  | -3.549 | -1.417 | -4.042 | -4.594 | -3.746 | -4.445 | -4.018 | -1.735 | 233489 | PICALM   | NM_146194_7_+1  |
| Slc5a11  | -3.668 | -2.681 | -1.539 | -1.565 | -0.794 | -0.311 | 0.932  | 0.821  | 1.238  | 1.127  | 233836 | SLC5A11  | NM_146198_7_+1  |
| Eif3c    | 6.885  | 6.816  | 7.478  | 7.471  | 7.293  | 7.207  | 7.510  | 7.351  | 7.259  | 7.145  | 56347  | EIF3C    | NM_146200_7_-1  |
| Zfp553   | 2.433  | 2.313  | 2.637  | 2.954  | 2.626  | 2.390  | 2.541  | 2.245  | 3.174  | 3.012  | 233887 | ZNF48    | NM_146201_7_+1  |
| Zfp768   | 2.351  | 2.023  | 2.563  | 2.466  | 2.138  | 2.140  | 2.215  | 2.432  | 3.048  | 3.200  | 233890 | ZNF768   | NM_146202_7_-1  |
| Zfp764   | 2.798  | 2.901  | 2.727  | 2.470  | 2.362  | 1.157  | 2.265  | 1.759  | 2.743  | 2.846  | 233893 | ZNF764   | NM_146203_7_-1  |
| Armc5    | 4.247  | 4.182  | 4.195  | 3.936  | 4.205  | 4.002  | 4.130  | 3.913  | 4.447  | 4.069  | 233912 | ARMC5    | NM_146205_7_+1  |
| Tpcn2    | 2.546  | 2.513  | 4.389  | 4.110  | 3.430  | 3.451  | 3.523  | 3.465  | 3.572  | 3.536  | 233979 | TPCN2    | NM_146206_7_-1  |
| Cul4a    | 3.993  | 4.250  | 4.811  | 5.016  | 4.629  | 4.723  | 4.725  | 4.792  | 5.675  | 5.836  | 99375  | CUL4A    | NM_146207_8_+1  |
| Neil3    | -1.987 | -4.981 | 1.547  | 1.771  | 3.195  | 2.140  | 2.261  | 1.746  | 1.814  | 0.667  | 234258 | NEIL3    | NM_146208_8_-1  |
| Colgalt1 | 6.596  | 6.846  | 6.340  | 6.490  | 6.596  | 6.719  | 6.794  | 6.713  | 6.902  | 6.757  | 234407 | COLGALT1 | NM_146211_8_+1  |
| Cmtr2    | 2.325  | 2.633  | 2.717  | 2.773  | 2.058  | 2.383  | 1.996  | 2.275  | 3.015  | 3.314  | 234728 | CMTR2    | NM_146215_8_+1  |
| Vac14    | 5.987  | 6.017  | 5.922  | 6.223  | 5.911  | 5.814  | 5.811  | 5.838  | 6.159  | 6.170  | 234729 | VAC14    | NM_146216_8_+1  |
| Aars     | 4.574  | 4.225  | 5.853  | 5.904  | 5.389  | 5.492  | 5.020  | 5.336  | 5.276  | 5.048  | 234734 | AARS     | NM_146217_8_+1  |
| Rfwd3    | 3.167  | 2.857  | 4.789  | 3.825  | 5.291  | 4.147  | 5.169  | 5.355  | 5.673  | 4.008  | 234736 | RFWD3    | NM_146218_8_-1  |
| Klhl36   | 4.454  | 4.250  | 4.277  | 4.547  | 4.621  | 4.775  | 4.546  | 4.552  | 4.520  | 4.710  | 234796 | KLHL36   | NM_146219_8_+1  |
| Zfp426   | 1.039  | 0.530  | 2.301  | 2.182  | 1.916  | 2.185  | 1.719  | 2.291  | 2.440  | 2.787  | 235028 | ZNF426   | NM_146221_9_-1  |
| Msantd2  | 3.483  | 3.526  | 2.480  | 2.210  | 2.861  | 2.663  | 2.775  | 2.754  | 2.801  | 2.608  | 235184 | NA       | NM_146222_9_+1  |
| Zfp280d  | 4.456  | 4.451  | 4.010  | 3.872  | 4.273  | 4.299  | 3.940  | 3.928  | 3.454  | 3.490  | 235469 | ZNF280D  | NM_146224_9_+1  |
| Apeh     | 5.700  | 5.790  | 5.489  | 5.765  | 5.519  | 5.734  | 5.289  | 5.582  | 5.143  | 5.244  | 235606 | APEH     | NM_146226_9_-1  |
| Prss50   | -4.981 | -4.981 | -4.924 | -1.365 | -1.349 | -2.065 | -1.892 | -0.188 | -2.598 | -4.981 | 235631 | PRSS50   | NM_146227_9_+1  |
| Als2cl   | -4.117 | -3.548 | 2.083  | 2.004  | 0.917  | 1.930  | 0.775  | 0.612  | 1.050  | 0.997  | 235633 | ALS2CL   | NM_146228_9_+1  |
| Dync1li1 | 5.115  | 5.305  | 5.347  | 5.226  | 4.922  | 4.756  | 4.878  | 4.996  | 5.673  | 5.684  | 235661 | DYNC1LI1 | NM_146229_9_+1  |
| Acaa1b   | -1.440 | -2.009 | -2.170 | -1.890 | -2.459 | -3.815 | -2.146 | -3.303 | -2.513 | -1.928 | 235674 | NA       | NM_146230_9_-1  |
| Zfp825   | 4.296  | 3.977  | 3.117  | 3.454  | 3.258  | 3.235  | 3.425  | 3.651  | 3.312  | 4.138  | 235956 | NA       | NM_146231_13_-1 |

|          |        |        |        |        |        |        |        |        |        |        |        |               |                 |
|----------|--------|--------|--------|--------|--------|--------|--------|--------|--------|--------|--------|---------------|-----------------|
| Mmgt1    | 3.574  | 3.769  | 3.692  | 3.397  | 3.123  | 3.140  | 3.716  | 3.854  | 4.098  | 4.656  | 236792 | MMGT1         | NM_146234_X_-1  |
| Erc6l    | 0.203  | 0.085  | 3.712  | 3.350  | 2.331  | 1.471  | 2.647  | 2.460  | 1.807  | 1.679  | 236930 | ERCC6L        | NM_146235_X_-1  |
| Tceal1   | 1.019  | 2.128  | 0.123  | -0.856 | -1.620 | -1.456 | -0.914 | -0.517 | -3.373 | -2.867 | 237052 | TCEAL1        | NM_146236_X_+1  |
| Gemin8   | 5.109  | 4.135  | 2.037  | 1.571  | 3.271  | 2.694  | 2.543  | 1.894  | 0.745  | -0.108 | 237221 | GEMIN8        | NM_146238_X_+1  |
| Cdk17    | 4.736  | 5.042  | 3.727  | 4.077  | 5.270  | 5.595  | 4.940  | 5.153  | 5.340  | 5.587  | 237459 | CDK17         | NM_146239_10_+1 |
| Lrrc10   | -4.981 | -2.895 | -4.975 | -4.870 | -4.974 | -4.974 | -4.981 | -4.981 | -4.981 | -4.981 | 237560 | LRRC10        | NM_146242_10_+1 |
| Actr2    | 6.733  | 6.948  | 7.946  | 7.909  | 8.065  | 7.990  | 8.004  | 8.279  | 8.130  | 8.948  | 66713  | ACTR2         | NM_146243_11_-1 |
| Rps6kl1  | -1.275 | 1.930  | -1.589 | -2.303 | -3.321 | -3.200 | -3.643 | -3.363 | -1.494 | -2.031 | 238323 | RPS6KL1       | NM_146244_12_-1 |
| Mettl22  | 4.230  | 4.255  | 3.213  | 3.200  | 3.346  | 3.490  | 2.965  | 2.842  | 2.143  | 2.175  | 239706 | METTL22       | NM_146247_16_+1 |
| Cchcr1   | 1.251  | 2.194  | 1.948  | 1.907  | 1.365  | 1.269  | 1.406  | 1.113  | 0.738  | 0.724  | 240084 | CCHCR1        | NM_146248_17_+1 |
| Zfp119b  | 3.679  | 3.362  | 3.201  | 3.120  | 3.009  | 2.776  | 2.855  | 2.548  | 2.636  | 2.950  | 240120 | NA            | NM_146249_17_-1 |
| Gpr1     | -4.981 | -4.981 | -1.139 | -4.690 | -4.981 | -4.981 | -4.275 | -3.080 | -3.373 | -4.981 | 241070 | GPR1          | NM_146250_1_-1  |
| Pnpla7   | 5.029  | 4.809  | 5.585  | 5.421  | 5.731  | 6.084  | 5.742  | 5.770  | 6.442  | 6.503  | 241274 | PNPLA7        | NM_146251_2_+1  |
| Tbc1d13  | 2.045  | 1.613  | 1.884  | 1.832  | 1.905  | 2.174  | 2.579  | 2.321  | 2.855  | 2.760  | 70296  | TBC1D13       | NM_146252_2_+1  |
| Zbtb6    | 2.412  | 2.823  | 3.828  | 3.540  | 3.181  | 3.222  | 3.272  | 2.835  | 3.323  | 3.935  | 241322 | ZBTB6         | NM_146253_2_-1  |
| Wdr78    | 0.936  | 0.836  | -1.427 | -2.006 | -0.795 | -0.257 | -0.260 | -0.234 | -0.781 | -0.340 | 242584 | WDR78         | NM_146254_4_-1  |
| Slc1a7   | -3.563 | -4.981 | -3.161 | -3.410 | -3.153 | -3.829 | -4.109 | -3.434 | -4.981 | -2.438 | 242607 | SLC1A7        | NM_146255_4_+1  |
| Hpd1     | -2.388 | -4.981 | -2.011 | -3.900 | -4.986 | -4.798 | -4.168 | -4.098 | -4.981 | -3.855 | 242642 | HPD1          | NM_146256_4_-1  |
| Slc29a4  | -4.981 | -2.291 | -4.871 | -4.551 | -4.045 | -4.083 | -4.191 | -1.319 | -3.531 | -4.981 | 243328 | SLC29A4       | NM_146257_5_+1  |
| Stard13  | -4.981 | 0.386  | 0.544  | -0.454 | -4.977 | -4.513 | -4.685 | -4.014 | -4.981 | -4.981 | 243362 | STARD13       | NM_146258_5_-1  |
| Zfp668   | 3.276  | 3.084  | 3.406  | 3.589  | 3.451  | 3.605  | 3.208  | 3.193  | 3.421  | 3.570  | 244219 | ZNF668        | NM_146259_7_-1  |
| Tmie     | -4.981 | -4.981 | -1.880 | -1.584 | -1.116 | -1.129 | -1.193 | -2.806 | -4.190 | -3.758 | 20776  | TMIE          | NM_146260_9_-1  |
| Fam199x  | 3.043  | 3.112  | 3.439  | 3.209  | 3.168  | 3.313  | 3.560  | 3.004  | 3.208  | 4.256  | 245622 | FAM199X       | NM_146261_X_+1  |
| Olfr1449 | -4.981 | -4.981 | -4.981 | -4.981 | -4.343 | -4.509 | -4.918 | -3.282 | -4.981 | -3.758 | 258300 | NA            | NM_146303_19_+1 |
| Olfr110  | -4.981 | -1.716 | -3.571 | -3.228 | -0.569 | 0.560  | -0.409 | 0.116  | -4.981 | -3.853 | 258325 | OR5V1         | NM_146328_17_+1 |
| Olfr1396 | -4.981 | -4.981 | -4.750 | -4.928 | -4.968 | -4.968 | -4.961 | -4.170 | -4.981 | -4.981 | 258334 | OR2V2         | NM_146337_11_-1 |
| Olfr458  | -3.349 | -3.267 | -4.958 | -4.581 | -4.526 | -4.495 | -3.824 | -4.874 | -3.750 | -4.981 | 258436 | NA            | NM_146444_6_-1  |
| Olfr164  | 4.389  | 3.979  | -4.988 | -4.475 | -4.229 | -4.084 | -3.415 | -3.100 | -4.981 | -4.981 | 258443 | OR2M3         | NM_146451_16_-1 |
| Olfr108  | -4.981 | -4.981 | -4.312 | -4.815 | -4.974 | -4.885 | -4.970 | -4.734 | -4.981 | -4.981 | 258457 | NA            | NM_146465_17_+1 |
| Olfr165  | -0.457 | -1.118 | -4.972 | -4.972 | -4.981 | -4.981 | -4.981 | -4.981 | -4.981 | -4.981 | 258458 | OR2M5         | NM_146466_16_-1 |
| Olfr90   | -4.981 | -4.981 | -4.495 | -4.958 | -4.907 | -3.979 | -4.976 | -3.791 | -4.981 | -4.981 | 258469 | OR2H2         | NM_146477_17_-1 |
| Olfr98   | -0.633 | -1.275 | -0.943 | -0.502 | -1.093 | -1.248 | -1.377 | -1.504 | -4.981 | -4.981 | 258503 | NA            | NM_146510_17_-1 |
| Olfr99   | -0.184 | -0.080 | -0.134 | 0.667  | -0.026 | -0.606 | -0.660 | -0.237 | -0.880 | -2.392 | 258508 | NA            | NM_146515_17_-1 |
| Olfr1033 | 0.326  | -3.408 | -3.860 | -4.071 | -4.675 | -4.778 | -3.203 | -4.034 | -4.394 | -3.882 | 258571 | NA            | NM_146578_2_+1  |
| Olfr733  | -4.981 | -4.981 | -1.713 | -4.398 | -4.769 | -4.970 | -4.596 | -4.971 | -4.981 | -4.981 | 258657 | OR4N2         | NM_146663_14_-1 |
| Olfr1444 | -4.981 | -2.126 | -4.077 | -2.639 | -4.795 | -3.135 | -3.777 | -2.982 | -4.981 | -2.480 | 258697 | OR5B21        | NM_146702_19_+1 |
| Olfr432  | -2.573 | 0.621  | -2.148 | 0.528  | -4.729 | 0.450  | -4.617 | -1.114 | -2.305 | -4.227 | 258711 | NA            | NM_146716_1_+1  |
| Olfr433  | 3.007  | 5.459  | 3.382  | 5.009  | 0.576  | 5.014  | -0.062 | 2.775  | -0.717 | 0.537  | 258712 | NA            | NM_146717_1_+1  |
| Olfr920  | -1.268 | -0.852 | -1.195 | -1.525 | -1.926 | -2.918 | -1.542 | -3.167 | -0.879 | -0.408 | 258783 | NA            | NM_146787_9_+1  |
| Olfr109  | -4.981 | -4.981 | -2.951 | -3.258 | -4.393 | -4.787 | -4.976 | -4.904 | -4.981 | -4.981 | 258832 | OR12D3        | NM_146835_17_+1 |
| Olfr167  | -0.948 | -1.520 | -4.981 | -4.981 | -4.981 | -4.981 | -4.974 | -4.978 | -4.981 | -4.981 | 258937 | OR2L2         | NM_146935_16_-1 |
| Olfr173  | -4.981 | -2.895 | -4.749 | -4.903 | -4.928 | -4.928 | -4.974 | -4.978 | -4.981 | -4.981 | 259002 | OR5K1         | NM_147000_16_-1 |
| Olfr713  | -4.981 | -4.981 | -4.986 | -3.012 | -4.981 | -4.981 | -4.981 | -4.981 | -4.981 | -4.981 | 259036 | OR10A5        | NM_147034_7_+1  |
| Olfr658  | -2.647 | -4.981 | -4.522 | -4.688 | -1.280 | -4.930 | -3.158 | -4.882 | -4.190 | -3.797 | 259051 | OR52N4        | NM_147049_7_-1  |
| Olfr613  | -0.201 | 0.549  | 0.695  | 0.400  | 1.087  | 0.440  | 0.245  | -0.523 | 0.319  | -0.106 | 259104 | NA            | NM_147100_7_+1  |
| Elhmt2   | 4.487  | 4.132  | 4.129  | 3.750  | 5.099  | 4.770  | 4.645  | 4.496  | 4.767  | 3.941  | 110147 | EHMT2         | NM_147151_17_+1 |
| Vps39    | 4.072  | -0.741 | 3.910  | -0.618 | 2.943  | -0.703 | 1.715  | -0.044 | 1.233  | -0.787 | 269338 | VPS39         | NM_147153_2_-1  |
| Tagap1   | 5.622  | 6.168  | 5.242  | 5.246  | 4.983  | 5.336  | 4.607  | 4.866  | 4.193  | 4.161  | 380608 | NA            | NM_147155_17_-1 |
| Homer1   | -1.568 | -1.506 | -2.110 | -0.499 | -2.192 | -1.038 | -1.050 | -2.065 | -0.434 | -0.042 | 26556  | HOMER1        | NM_147176_13_+1 |
| Nrbp1    | 6.622  | 6.528  | 7.212  | 7.371  | 6.875  | 7.015  | 7.014  | 7.343  | 7.721  | 7.677  | 192292 | NRBP1         | NM_147201_5_+1  |
| Gprc5c   | -4.769 | -4.591 | 1.009  | 0.837  | -4.819 | -3.354 | -4.972 | -4.974 | -4.966 | -4.958 | 70355  | GPRC5C        | NM_147217_11_+1 |
| Abca6    | 1.543  | 1.396  | -2.388 | -3.493 | -3.710 | -4.356 | 0.525  | -0.752 | 4.555  | 3.268  | 76184  | ABCA6         | NM_147218_11_-1 |
| Abca5    | 3.150  | 3.931  | 1.502  | 2.627  | 1.309  | 2.434  | -0.975 | 1.473  | -4.981 | 0.236  | 217265 | ABCA5         | NM_147219_11_-1 |
| Abca9    | 0.021  | 0.367  | -1.608 | 1.386  | 2.392  | 2.202  | 5.433  | 5.601  | 6.580  | 7.651  | 217262 | ABCA9         | NM_147220_11_-1 |
| Glis1    | -4.981 | -4.981 | -4.981 | -4.981 | -4.959 | -4.537 | -2.323 | -4.769 | -1.539 | -4.316 | 230587 | GLIS1         | NM_147221_4_+1  |
| Vwa1     | -1.031 | -4.981 | -0.060 | 0.675  | -3.559 | -0.214 | -2.634 | -1.103 | -2.946 | -1.756 | 246228 | VWA1          | NM_147776_4_-1  |
| Commd3   | 8.076  | 7.681  | 6.730  | 6.552  | 6.746  | 6.494  | 6.556  | 6.163  | 5.813  | 5.409  | 12238  | COMMD3        | NM_147778_2_+1  |
| Slu7     | 4.339  | 4.077  | 4.315  | 4.244  | 4.334  | 4.010  | 3.514  | 3.947  | 4.358  | 4.035  | 193116 | SLU7          | NM_148673_11_+1 |
| Pabpc4   | 1.921  | 0.794  | 1.616  | 0.690  | 0.913  | 1.442  | 0.685  | 1.184  | -0.564 | -1.208 | 230721 | PABPC4        | NM_148917_4_+1  |
| Mdm1     | -0.334 | -0.309 | -0.278 | -2.578 | -0.656 | 0.068  | -3.762 | -1.561 | -3.893 | -4.251 | 17245  | MDM1          | NM_148922_10_+1 |
| Zfp263   | 5.204  | 4.875  | 6.449  | 6.077  | 7.015  | 7.140  | 6.500  | 6.250  | 6.440  | 6.511  | 74120  | ZNF263        | NM_148924_16_+1 |
| Fyco1    | 0.520  | 3.220  | 3.649  | 4.001  | 2.609  | 3.232  | 2.970  | 2.754  | 2.743  | 2.745  | 17281  | FYCO1         | NM_148925_9_-1  |
| Zfand3   | 3.118  | 3.266  | 3.611  | 3.498  | 3.884  | 3.819  | 4.038  | 3.410  | 3.800  | 3.632  | 21769  | ZFAND3        | NM_148926_17_+1 |
| Plekha4  | -0.190 | 0.377  | -1.845 | -2.623 | -2.438 | -2.574 | -3.258 | -3.669 | -2.792 | -3.510 | 69217  | PLEKHA4       | NM_148927_7_+1  |
| Gtf3c5   | 3.476  | 3.949  | 3.559  | 3.903  | 3.816  | 3.681  | 3.508  | 3.931  | 4.051  | 3.914  | 70239  | GTF3C5        | NM_148928_2_-1  |
| Slc9a8   | 3.576  | 3.688  | 3.803  | 3.994  | 4.062  | 4.037  | 3.749  | 3.927  | 4.502  | 4.002  | 77031  | SLC9A8        | NM_148929_2_+1  |
| Rbm5     | 7.115  | 7.475  | 7.179  | 7.218  | 7.712  | 7.951  | 7.154  | 7.284  | 6.715  | 7.136  | 83486  | RBM5          | NM_148930_9_-1  |
| Pom121   | 3.388  | 3.209  | 4.081  | 4.100  | 4.280  | 4.244  | 4.086  | 3.807  | 4.920  | 4.666  | 107939 | POM121 POM121 | NM_148932_5_-1  |
| Slco4a1  | 7.015  | 6.856  | 0.249  | -0.279 | -1.247 | -1.659 | -0.756 | 0.000  | 0.508  | -4.981 | 108115 | SLCO4A1       | NM_148933_2_+1  |
| Tpgs1    | 5.844  | 5.647  | 5.316  | 5.187  | 4.881  | 4.846  | 5.186  | 5.215  | 5.929  | 5.635  | 110012 | TPGS1         | NM_148934_10_+1 |
| Plcd4    | -4.793 | -4.722 | -4.970 | -4.969 | -4.954 | -4.979 | -4.980 | -4.981 | -4.907 | -4.981 | 18802  | PLCD4         | NM_148937_1_+1  |
| Slc1a3   | 0.206  | -0.186 | -1.344 | -1.487 | 0.450  | -0.251 | 0.544  | 0.241  | -2.052 | -2.309 | 20512  | SLC1A3        | NM_148938_15_-1 |
| Ly6g5b   | 3.549  | 1.680  | -1.028 | -1.098 | -1.639 | -2.287 | -3.363 | -2.500 | -1.085 | -1.727 | 266614 | LY6G5B        | NM_148939_17_-1 |
| Chrn4    | -4.981 | -4.981 | -4.627 | -4.512 | -4.915 | -4.010 | -4.488 | -3.829 | -4.981 | -4.981 | 108015 | CHRN4         | NM_148944_9_-1  |

|          |        |        |        |        |        |        |        |        |        |        |        |             |                 |
|----------|--------|--------|--------|--------|--------|--------|--------|--------|--------|--------|--------|-------------|-----------------|
| Rps6ka3  | 4.593  | 4.505  | 4.439  | 4.085  | 4.723  | 4.555  | 4.660  | 4.300  | 3.948  | 4.810  | 110651 | RP56KA3     | NM_148945_X_+1  |
| Slc8a2   | -4.981 | -4.981 | -4.884 | -3.646 | 1.738  | 2.274  | -1.130 | -2.786 | -4.981 | -4.981 | 110891 | SLC8A2      | NM_148946_7_+1  |
| Dicer1   | 4.384  | 4.282  | 4.701  | 4.690  | 4.436  | 4.463  | 4.569  | 4.466  | 4.943  | 4.871  | 192119 | DICER1      | NM_148948_12_-1 |
| Gipc3    | -1.532 | -0.994 | -4.806 | -4.838 | -4.972 | -4.972 | -4.968 | -4.832 | -4.981 | -4.981 | 209047 | GIPC3       | NM_148951_10_-1 |
| E2f4     | 5.170  | 5.063  | 5.201  | 5.469  | 5.266  | 5.404  | 5.002  | 5.349  | 5.815  | 5.758  | 104394 | E2F4        | NM_148952_8_+1  |
| Osbpl10  | -4.981 | -0.061 | -4.951 | -2.729 | -1.439 | 0.125  | -4.797 | -1.963 | -2.989 | 0.795  | 74486  | OSBPL10     | NM_148958_9_+1  |
| Homer1   | 0.477  | -0.146 | -1.011 | -1.203 | -2.287 | -1.445 | -1.394 | -1.914 | -0.450 | -1.166 | 26556  | HOMER1      | NM_152134_13_+1 |
| Stx3     | 2.854  | 4.609  | 4.764  | 5.932  | 2.166  | 3.712  | 3.910  | 5.043  | 5.948  | 7.011  | 20908  | STX3        | NM_152220_19_-1 |
| Ubqln1   | 5.009  | 5.170  | 5.399  | 5.676  | 6.002  | 6.028  | 5.615  | 5.634  | 5.304  | 5.659  | 56085  | UBQLN1      | NM_152234_13_-1 |
| Pear1    | -4.375 | -4.047 | -4.828 | -4.715 | -4.962 | -4.954 | -2.877 | -4.712 | -4.910 | -2.463 | 73182  | PEAR1       | NM_152799_3_-1  |
| Tor2a    | 6.459  | 6.511  | 4.987  | 4.886  | 4.822  | 4.808  | 5.016  | 5.137  | 5.293  | 5.120  | 30933  | TOR2A       | NM_152800_2_+1  |
| Arhgef6  | 7.229  | 7.502  | 7.239  | 7.270  | 7.174  | 7.335  | 7.175  | 7.134  | 7.315  | 7.592  | 73341  | ARHGEF6     | NM_152801_X_-1  |
| Hpse     | 7.447  | 7.531  | 4.594  | 4.265  | 4.180  | 4.505  | 5.789  | 6.802  | 7.894  | 8.508  | 15442  | HPSE        | NM_152803_5_-1  |
| Plk2     | 1.648  | 1.020  | 4.005  | 2.349  | 4.137  | 3.395  | 4.358  | 3.591  | 3.823  | 3.115  | 20620  | PLK2        | NM_152804_13_+1 |
| Ddx17    | 4.795  | 5.282  | 3.371  | 3.074  | 3.277  | 3.244  | 4.146  | 2.429  | 3.612  | 3.510  | 67040  | DDX17       | NM_152806_15_-1 |
| Ccdc137  | 4.287  | 4.047  | 3.663  | 3.680  | 3.806  | 4.016  | 3.797  | 3.715  | 3.602  | 3.593  | 67291  | CCDC137     | NM_152807_11_+1 |
| Slc44a2  | 0.923  | 1.132  | -0.706 | -0.978 | -0.797 | -0.773 | 0.530  | 0.320  | 0.566  | 0.746  | 68682  | SLC44A2     | NM_152808_9_+1  |
| Csnk1g3  | 4.929  | 5.741  | 5.946  | 5.996  | 6.673  | 7.119  | 5.973  | 5.963  | 5.153  | 5.768  | 70425  | CSNK1G3     | NM_152809_18_+1 |
| Cdc5l    | 6.556  | 6.784  | 6.977  | 6.952  | 7.338  | 7.320  | 7.168  | 6.864  | 6.521  | 6.504  | 71702  | CDC5L       | NM_152810_17_-1 |
| Otud6b   | 5.244  | 5.153  | 4.747  | 4.689  | 4.139  | 3.955  | 4.211  | 4.445  | 4.842  | 5.049  | 72201  | OTUD6B      | NM_152812_4_-1  |
| Plcd3    | 2.567  | -4.981 | -0.658 | -1.455 | 0.063  | -4.361 | -1.582 | -4.489 | -4.394 | -4.227 | 72469  | PLCD3       | NM_152813_11_-1 |
| Zfp566   | 2.656  | 2.361  | 1.921  | 1.544  | 2.030  | 1.910  | 1.921  | 1.267  | 1.619  | 1.510  | 72556  | ZNF566      | NM_152814_7_-1  |
| Lins1    | -0.616 | -3.039 | -0.066 | -1.707 | -0.184 | -0.789 | -0.913 | -1.890 | -4.130 | 0.814  | 72635  | LINS1       | NM_152815_7_+1  |
| Dnm1l    | 3.416  | 2.506  | 2.611  | 2.146  | 2.179  | 2.440  | 1.861  | 1.874  | 2.527  | 1.293  | 74006  | DNM1L       | NM_152816_16_-1 |
| Ttc27    | 2.559  | 2.982  | 2.812  | 3.020  | 2.602  | 2.704  | 2.655  | 2.807  | 2.544  | 1.855  | 74196  | TTC27       | NM_152817_17_+1 |
| Osbp2    | 0.881  | -0.739 | -4.315 | -3.503 | -4.961 | -4.689 | -4.796 | -4.929 | -4.981 | -4.981 | 74309  | OSBP2       | NM_152818_11_-1 |
| Purg     | -1.831 | -1.285 | -0.960 | -2.592 | -1.592 | -1.943 | -1.630 | -3.449 | -1.593 | -2.686 | 75029  | PURG        | NM_152821_8_+1  |
| Las1l    | 4.956  | 4.967  | 4.643  | 4.838  | 4.924  | 5.019  | 4.951  | 4.967  | 4.599  | 4.479  | 76130  | LAS1L       | NM_152822_X_-1  |
| Unc5cl   | 2.407  | 2.894  | -4.405 | 0.370  | -0.489 | 1.266  | -2.936 | 0.656  | -4.981 | -2.424 | 76589  | UNC5CL      | NM_152823_17_+1 |
| Rbm17    | 6.855  | 6.872  | 7.084  | 7.303  | 6.746  | 6.685  | 6.626  | 6.529  | 6.103  | 6.015  | 76938  | RBM17       | NM_152824_2_-1  |
| Usp45    | 2.065  | 2.665  | 3.829  | 3.385  | 3.770  | 3.816  | 3.990  | 3.931  | 4.231  | 4.609  | 77593  | USP45       | NM_152825_4_+1  |
| Jchain   | 6.289  | 6.641  | 4.792  | 5.476  | 3.446  | 6.471  | 8.226  | 11.099 | -0.081 | 0.574  | 16069  | JCHAIN      | NM_152839_5_-1  |
| Pop1     | -3.504 | -4.469 | -0.593 | -4.598 | -3.172 | -4.821 | -4.135 | -4.693 | -4.670 | -4.627 | 67724  | POP1        | NM_152894_15_+1 |
| Kdm5b    | 3.977  | 3.696  | 3.267  | 3.436  | 4.429  | 4.725  | 4.403  | 4.523  | 4.929  | 4.888  | 75605  | KDM5B       | NM_152895_1_+1  |
| Dner     | -4.981 | -4.981 | -4.981 | -4.981 | -4.260 | -4.954 | -4.417 | -4.903 | -2.248 | -4.981 | 227325 | DNER        | NM_152915_1_-1  |
| Egfl8    | -0.016 | -0.566 | 3.802  | 4.562  | 1.276  | 2.430  | 0.693  | 1.690  | 0.597  | 0.015  | 81701  | EGFL8       | NM_152922_17_-1 |
| Kcnq3    | -4.981 | -4.981 | -4.981 | -4.981 | -4.597 | -4.815 | -2.107 | -1.118 | -0.420 | 0.201  | 110862 | KCNQ3       | NM_152923_15_-1 |
| Mmp21    | -2.647 | -4.981 | -4.167 | -4.151 | -4.966 | -4.966 | -4.437 | -4.882 | -4.981 | -4.981 | 214766 | MMP21       | NM_152944_7_-1  |
| Ovol2    | -4.981 | -4.981 | -4.981 | -4.981 | -4.977 | -4.083 | -4.981 | -4.981 | -4.981 | -4.981 | 107586 | OVOL2       | NM_152947_2_-1  |
| Mkl1     | 4.402  | 4.397  | 6.145  | 5.835  | 6.761  | 6.665  | 6.416  | 5.945  | 6.491  | 6.284  | 223701 | MKL1        | NM_153049_15_-1 |
| Sf3b4    | 6.190  | 6.156  | 6.090  | 6.202  | 6.253  | 6.008  | 6.053  | 6.144  | 5.975  | 5.738  | 107701 | SF3B4       | NM_153053_3_+1  |
| Slc18a1  | -3.843 | -2.895 | 0.277  | 0.997  | -2.038 | -3.615 | -1.945 | -3.008 | -1.719 | -3.191 | 110877 | SLC18A1     | NM_153054_8_-1  |
| Sec63    | 6.478  | 6.536  | 6.711  | 6.558  | 5.598  | 5.592  | 5.672  | 5.958  | 5.788  | 6.143  | 140740 | SEC63       | NM_153055_10_+1 |
| Sirt7    | 7.535  | 7.723  | 7.491  | 7.561  | 7.944  | 8.162  | 7.523  | 7.464  | 7.758  | 7.625  | 209011 | SIRT7       | NM_153056_11_-1 |
| Nomo1    | 3.832  | 3.779  | 4.298  | 4.548  | 3.764  | 3.937  | 3.663  | 3.944  | 4.278  | 4.308  | 211548 | NOMO1 NOMO2 | NM_153057_7_+1  |
| Mapre2   | 6.261  | 6.501  | 6.369  | 6.352  | 5.812  | 5.576  | 6.508  | 6.510  | 7.015  | 6.930  | 212307 | NA          | NM_153058_18_+1 |
| Tmem5    | 5.674  | 5.655  | 4.579  | 4.700  | 4.443  | 4.359  | 4.724  | 4.802  | 4.870  | 4.820  | 216395 | TMEM5       | NM_153059_10_-1 |
| Spns2    | -1.560 | -1.501 | -2.508 | -1.370 | -1.048 | -1.629 | -2.977 | -0.407 | -4.800 | -4.927 | 216892 | SPNS2       | NM_153060_11_-1 |
| Slc37a1  | 1.811  | 0.555  | 2.351  | 1.825  | 2.327  | 1.286  | 1.839  | 1.908  | 1.653  | 1.690  | 224674 | SLC37A1     | NM_153062_17_+1 |
| Zfp472   | 5.063  | 4.961  | 3.475  | 3.302  | 4.083  | 3.870  | 4.040  | 3.372  | 3.785  | 3.204  | 224691 | NA          | NM_153063_17_+1 |
| Ndufs2   | 7.533  | 7.433  | 7.086  | 7.121  | 7.230  | 7.082  | 7.278  | 7.306  | 7.124  | 7.059  | 226646 | NDUFS2      | NM_153064_1_-1  |
| Ddx27    | 5.281  | 5.255  | 5.280  | 5.303  | 5.512  | 5.446  | 5.486  | 5.295  | 5.190  | 4.706  | 228889 | DDX27       | NM_153065_2_+1  |
| Ehd2     | -2.483 | -4.981 | -4.260 | -1.810 | -3.056 | -2.489 | -4.296 | -0.278 | -3.823 | -0.616 | 259300 | EHD2        | NM_153068_7_-1  |
| Leap2    | -4.981 | -1.242 | -4.973 | -3.269 | -4.821 | -4.511 | -4.452 | -3.439 | -4.394 | -2.152 | 259301 | LEAP2       | NM_153069_11_-1 |
| Hus1b    | -1.987 | -3.267 | -1.667 | -2.862 | -3.353 | -3.442 | -2.918 | -3.853 | -1.102 | -1.774 | 210554 | HUS1B       | NM_153072_13_-1 |
| Lrrc25   | 0.526  | 0.339  | 3.613  | 3.564  | 4.290  | 4.180  | 4.205  | 3.951  | 4.611  | 4.773  | 211228 | LRRC25      | NM_153074_8_+1  |
| Catsper2 | 1.783  | 1.468  | 1.480  | 1.486  | 1.251  | 1.595  | 0.632  | 0.410  | -0.554 | -0.206 | 212670 | CATSPER2    | NM_153075_2_-1  |
| Crygn    | -3.668 | -4.981 | -3.048 | -3.284 | -2.737 | -3.791 | -1.526 | -3.497 | -1.526 | -2.909 | 214301 | CRYGN       | NM_153076_5_-1  |
| Ehbp1    | -0.735 | 0.378  | -0.188 | 0.064  | -0.351 | -0.076 | -0.314 | -0.629 | 0.459  | -2.093 | 216565 | EHBP1       | NM_153078_11_-1 |
| Tom1l2   | 3.334  | 2.987  | 2.166  | 1.941  | 1.159  | 0.371  | 1.398  | 0.723  | 3.430  | 2.746  | 216810 | TOM1L2      | NM_153080_11_-1 |
| Slc16a11 | -3.668 | -2.437 | -4.631 | -4.941 | -4.418 | -4.549 | -3.751 | -3.849 | -2.396 | -3.855 | 216867 | SLC16A11    | NM_153081_11_+1 |
| Dnajc27  | 2.248  | 2.789  | 2.307  | 2.402  | 3.245  | 3.079  | 3.062  | 2.638  | 2.915  | 2.898  | 217378 | DNAJC27     | NM_153082_12_+1 |
| Thtpa    | 3.427  | 3.369  | 3.439  | 3.449  | 2.794  | 3.228  | 3.206  | 3.160  | 3.751  | 3.728  | 105663 | THTPA       | NM_153083_14_+1 |
| Wac      | 5.167  | 5.051  | 5.460  | 5.358  | 5.307  | 5.223  | 4.859  | 5.302  | 5.959  | 5.997  | 225131 | WAC         | NM_153085_18_+1 |
| Hrh4     | -4.981 | -4.981 | -4.541 | -4.280 | -4.963 | -3.937 | -1.089 | -4.300 | -4.981 | -4.981 | 225192 | HRH4        | NM_153087_18_+1 |
| Ctdsp1   | 4.131  | 3.771  | 3.316  | 3.103  | 3.488  | 3.157  | 3.955  | 3.458  | 3.882  | 3.691  | 227292 | CTDSP1      | NM_153088_1_+1  |
| Ppp1r16b | 3.656  | 2.458  | 1.982  | 2.824  | 2.211  | 2.411  | 1.872  | 1.964  | -2.026 | -0.260 | 228852 | PPP1R16B    | NM_153089_2_+1  |
| Fcrl1    | -0.942 | -4.531 | 1.610  | 0.073  | 2.506  | 1.716  | 1.925  | 1.267  | -0.486 | -4.918 | 229499 | FCRL1       | NM_153090_3_+1  |
| St7l     | 4.179  | 5.057  | 4.414  | 4.046  | 4.110  | 4.213  | 4.092  | 3.960  | 3.812  | 4.187  | 229681 | ST7L        | NM_153091_3_+1  |
| Nupl2    | 4.208  | 3.250  | 3.613  | 3.733  | 3.334  | 3.250  | 2.996  | 2.918  | 2.986  | 2.715  | 231042 | NUPL2       | NM_153092_5_+1  |
| AF366264 | -4.981 | -4.981 | -4.945 | -4.748 | -4.981 | -4.981 | -4.981 | -4.981 | -4.981 | -4.981 | 231201 | NA          | NM_153093_8_-1  |
| Klrb1f   | 1.547  | 0.710  | 0.184  | -0.272 | 4.736  | 4.754  | 3.761  | 3.232  | 3.954  | 3.711  | 232408 | NA          | NM_153094_6_+1  |
| Mrgpra1  | -3.843 | -4.981 | -4.064 | -3.329 | -1.586 | -4.990 | -2.523 | -4.954 | -4.981 | -4.981 | 233221 | MRGPRX3     | NM_153095_7_-1  |
| Cd109    | -4.981 | -2.997 | -4.664 | -4.974 | -4.975 | -4.975 | -2.146 | -4.522 | -0.841 | 0.542  | 235505 | CD109       | NM_153098_9_+1  |

|               |        |        |        |        |        |        |        |        |        |        |        |           |                 |
|---------------|--------|--------|--------|--------|--------|--------|--------|--------|--------|--------|--------|-----------|-----------------|
| Prss42        | -4.981 | -4.981 | -4.301 | -3.773 | -3.484 | -4.615 | -4.970 | -4.734 | -4.190 | -4.981 | 235628 | PRSS42    | NM_153099_9_+1  |
| Mrgpra2b      | -4.981 | -4.981 | -4.374 | -0.361 | -3.367 | 0.631  | -2.400 | 1.624  | 1.364  | -1.073 | 235712 | MRGPRX3   | NM_153101_7_-1  |
| Kif1c         | 2.223  | 1.182  | 2.702  | 2.786  | 2.804  | 2.618  | 2.853  | 2.630  | 2.335  | 2.330  | 16562  | KIF1C     | NM_153103_11_+1 |
| Phospho1      | -4.981 | -4.981 | -4.922 | -4.800 | -4.786 | -4.995 | -4.266 | -3.725 | -1.944 | -1.984 | 237928 | PHOSPHO1  | NM_153104_11_+1 |
| Cldn19        | -4.981 | -4.981 | -4.989 | -1.647 | -4.967 | -4.817 | -4.471 | -4.961 | -4.981 | -4.981 | 242653 | CLDN19    | NM_153105_4_+1  |
| Padi6         | -1.253 | -2.132 | -4.981 | -4.981 | -4.250 | -4.985 | -4.981 | -4.981 | -2.416 | -4.981 | 242726 | PADI6     | NM_153106_4_-1  |
| Cadm4         | -2.647 | -4.981 | -4.974 | -4.396 | -3.751 | -4.272 | -4.985 | -4.900 | -4.981 | -4.227 | 260299 | CADM4     | NM_153112_7_+1  |
| Otos          | -1.705 | -4.981 | -3.719 | -3.542 | -3.745 | -4.842 | -2.009 | -3.290 | -1.647 | -2.580 | 260301 | OTOS      | NM_153114_1_-1  |
| Gtpbp10       | 3.550  | 3.070  | 3.247  | 2.445  | 3.150  | 2.205  | 3.150  | 2.457  | 3.203  | 2.592  | 207704 | GTPBP10   | NM_153116_5_-1  |
| 9530068E07Rik | 6.892  | 6.921  | 6.725  | 6.753  | 6.808  | 6.801  | 6.747  | 6.864  | 7.791  | 7.583  | 213673 | C5orf15   | NM_153117_11_+1 |
| Fnbp1l        | -4.981 | -4.981 | 3.467  | 3.405  | -0.663 | 0.319  | 0.345  | 0.325  | -0.028 | -0.516 | 214459 | NA        | NM_153118_3_-1  |
| Plekho2       | 4.735  | 5.018  | 8.172  | 8.298  | 7.386  | 7.121  | 7.868  | 7.976  | 9.119  | 9.166  | 102595 | PLEKHO2   | NM_153119_9_-1  |
| Lysmd1        | 4.464  | 3.931  | 3.860  | 3.599  | 3.190  | 2.786  | 3.410  | 3.262  | 4.670  | 4.021  | 217779 | LYSMD1    | NM_153121_3_+1  |
| Oplah         | 0.312  | -1.444 | -1.905 | -2.807 | -2.217 | -1.770 | -2.414 | -2.992 | -0.758 | -0.209 | 75475  | OPLAH     | NM_153122_15_-1 |
| Atf7ip2       | -4.981 | -4.981 | -4.981 | -4.981 | -0.251 | -2.537 | -4.958 | -4.970 | -4.981 | -4.981 | 75329  | ATF7IP2   | NM_153123_16_+1 |
| Sec16a        | 5.118  | 5.096  | 5.385  | 5.581  | 5.572  | 5.589  | 5.420  | 5.304  | 6.009  | 6.074  | 227648 | SEC16A    | NM_153125_2_-1  |
| Nat10         | 3.237  | 2.805  | 3.607  | 3.846  | 3.718  | 3.406  | 3.406  | 3.756  | 3.747  | 3.181  | 98956  | NAT10     | NM_153126_2_-1  |
| Klhl12        | 0.714  | 0.118  | -0.738 | 1.410  | -0.771 | 1.824  | 1.239  | 2.778  | 4.074  | 4.364  | 240756 | KLHL12    | NM_153128_1_+1  |
| Pacs1         | 2.858  | 2.407  | 4.900  | 4.439  | 4.514  | 4.495  | 4.660  | 4.516  | 6.354  | 5.683  | 107975 | PACS1     | NM_153129_19_-1 |
| Unc5a         | -1.385 | -4.981 | -1.863 | -3.404 | -1.816 | -4.199 | -1.273 | -4.414 | -0.947 | -4.981 | 107448 | UNC5A     | NM_153131_13_+1 |
| Rdh9          | -3.843 | -0.801 | -1.928 | -2.698 | -3.308 | -2.531 | -0.303 | -2.910 | -1.451 | -0.951 | 103142 | RDH16     | NM_153133_10_+1 |
| Irgq          | 1.938  | 3.077  | 2.147  | 1.626  | 1.840  | 1.232  | 1.642  | 1.936  | 2.880  | 2.763  | 210146 | IRGQ      | NM_153134_7_+1  |
| Nudt18        | 6.183  | 6.214  | 4.922  | 5.135  | 5.040  | 5.239  | 4.729  | 4.725  | 4.168  | 3.927  | 213484 | NUDT18    | NM_153136_14_+1 |
| Traf3ip3      | 4.797  | 5.103  | 5.996  | 5.960  | 5.743  | 5.865  | 5.621  | 5.869  | 6.040  | 5.803  | 215243 | TRAF3IP3  | NM_153137_1_-1  |
| Wipf1         | 1.069  | 1.967  | 3.394  | 2.528  | 2.631  | 3.047  | 4.826  | 4.513  | 5.430  | 4.971  | 215280 | WIPF1     | NM_153138_2_-1  |
| Slc36a1       | 2.060  | 2.047  | 1.321  | 0.719  | 2.010  | 2.099  | 2.778  | 2.595  | 3.339  | 3.646  | 215335 | SLC36A1   | NM_153139_11_+1 |
| Rab11fip3     | 0.128  | 0.295  | -1.545 | -3.060 | -2.382 | -2.484 | -1.593 | -2.165 | -0.339 | -0.898 | 215445 | RAB11FIP3 | NM_153140_17_-1 |
| Carm1         | 1.299  | 3.107  | 1.979  | 2.637  | 2.101  | 2.198  | 3.108  | 2.417  | 3.126  | 3.703  | 59035  | CARM1     | NM_153141_9_+1  |
| Slc35e4       | 3.189  | 2.755  | 2.959  | 3.092  | 0.751  | 0.398  | 3.089  | 3.325  | 5.533  | 5.329  | 103710 | SLC35E4   | NM_153142_11_-1 |
| Kctd11        | 2.031  | 2.176  | 3.153  | 3.306  | 2.141  | 1.951  | 2.824  | 2.933  | 3.772  | 4.052  | 216858 | KCTD11    | NM_153143_11_-1 |
| Ggnbp2        | 6.879  | 6.886  | 6.651  | 6.616  | 6.798  | 6.892  | 6.705  | 6.777  | 6.863  | 6.883  | 217039 | GGNBP2    | NM_153144_11_-1 |
| Abca8a        | -4.981 | -4.981 | -4.270 | -3.855 | -4.356 | -4.931 | -3.658 | -4.674 | -4.981 | -4.981 | 217258 | NA        | NM_153145_11_-1 |
| Slc25a1       | 6.497  | 6.442  | 5.790  | 6.030  | 5.333  | 5.667  | 5.511  | 5.671  | 4.911  | 4.905  | 13358  | NA        | NM_153150_16_-1 |
| Acat3         | -2.067 | 0.389  | -1.232 | -1.882 | -1.669 | -2.612 | -2.238 | -3.045 | -0.999 | -1.714 | 224530 | ACAT2     | NM_153151_17_-1 |
| 2410015M20Rik | 6.938  | 6.687  | 6.283  | 6.114  | 6.371  | 6.288  | 6.527  | 6.007  | 5.034  | 4.697  | 224904 | C19orf70  | NM_153152_17_-1 |
| Svil          | 4.102  | 4.437  | 2.367  | 2.354  | 2.686  | 2.718  | 4.834  | 4.794  | 6.933  | 7.060  | 225115 | SVIL      | NM_153153_18_+1 |
| C1ql3         | -4.981 | -4.981 | -3.995 | -4.024 | -4.674 | -3.953 | -4.371 | -4.389 | -3.598 | -2.445 | 227580 | C1QL3     | NM_153155_2_-1  |
| E130308A19Rik | 0.357  | 0.054  | 0.144  | -0.374 | 0.298  | 0.372  | 0.070  | -0.384 | 0.610  | 0.343  | 230259 | NA        | NM_153158_4_+1  |
| Zc3h12a       | 3.487  | 3.516  | 2.842  | 2.793  | 3.951  | 3.541  | 3.836  | 3.631  | 4.257  | 4.385  | 230738 | ZC3H12A   | NM_153159_4_-1  |
| Zcchc17       | 6.173  | 6.221  | 5.214  | 5.532  | 5.615  | 5.765  | 5.736  | 5.461  | 4.860  | 4.711  | 619605 | ZCCHC17   | NM_153160_4_-1  |
| BC037034      | 1.590  | 1.570  | 1.986  | 2.165  | 3.383  | 3.578  | 3.039  | 3.028  | 3.046  | 3.206  | 231807 | C7orf43   | NM_153161_5_-1  |
| Txnrd3        | -0.260 | 0.769  | 0.119  | 0.218  | -1.329 | -1.675 | -0.762 | -0.268 | 0.235  | 0.628  | 232223 | TXNRD3    | NM_153162_6_+1  |
| Cnot1         | 0.839  | -1.300 | -0.316 | -0.512 | -0.560 | -1.044 | -0.714 | -3.072 | 0.598  | -4.436 | 234594 | CNOT1     | NM_153164_8_-1  |
| Klhl15        | 2.676  | 2.782  | 1.235  | 0.855  | 1.593  | 1.226  | 1.131  | 1.256  | 1.188  | 0.448  | 236904 | KLHL15    | NM_153165_X_+1  |
| Cpne5         | -1.884 | 0.204  | -4.873 | -4.552 | -3.500 | -2.601 | -3.408 | -1.588 | -4.981 | -4.316 | 240058 | CPNE5     | NM_153166_17_-1 |
| Dcaf10        | 3.805  | 4.007  | 4.124  | 4.038  | 3.717  | 3.957  | 3.881  | 4.277  | 4.364  | 4.701  | 242418 | DCAF10    | NM_153167_4_+1  |
| Lars2         | 2.649  | 2.732  | 3.056  | 3.207  | 3.331  | 3.008  | 2.928  | 3.166  | 3.649  | 3.380  | 102436 | LARS2     | NM_153168_9_+1  |
| Slc36a2       | -4.981 | -4.981 | -4.565 | -4.958 | -2.815 | -3.696 | -4.410 | -3.940 | -2.021 | -4.981 | 246049 | SLC36A2   | NM_153170_11_-1 |
| Rgs13         | -4.981 | -4.981 | -4.930 | -4.930 | -4.569 | -2.805 | -2.287 | -0.600 | -4.981 | -4.981 | 246709 | RGS13     | NM_153171_1_-1  |
| Hist1h4h      | 0.997  | 0.357  | 0.772  | 0.575  | 0.960  | 0.832  | 1.061  | 0.280  | 1.225  | 0.151  | 69386  | HIST1H4H  | NM_153173_13_+1 |
| Gimap6        | 7.343  | 7.811  | 1.542  | 3.627  | 2.388  | 4.293  | 3.793  | 5.741  | 0.813  | 1.562  | 231931 | GIMAP6    | NM_153175_6_-1  |
| Spg7          | 4.590  | 4.749  | 5.289  | 5.221  | 5.086  | 5.171  | 4.952  | 4.945  | 5.394  | 5.186  | 234847 | SPG7      | NM_153176_8_+1  |
| Ago4          | 4.216  | 4.660  | 3.320  | 3.004  | 3.074  | 3.402  | 3.193  | 2.947  | 3.487  | 3.790  | 76850  | AGO4      | NM_153177_4_-1  |
| Ago2          | 2.435  | 2.558  | 3.539  | 3.434  | 4.525  | 3.849  | 4.145  | 3.897  | 4.796  | 4.720  | 239528 | AGO2      | NM_153178_15_-1 |
| Fbxo7         | 4.695  | 4.879  | 4.585  | 4.897  | 4.743  | 4.890  | 4.776  | 4.965  | 4.440  | 4.614  | 69754  | FBXO7     | NM_153195_10_+1 |
| Rbks          | 4.076  | 4.160  | 4.191  | 3.960  | 3.729  | 3.460  | 3.852  | 3.525  | 4.793  | 3.981  | 71336  | RBKS      | NM_153196_5_-1  |
| Clec4a3       | 2.021  | 1.441  | -0.232 | 1.823  | 4.718  | 5.270  | 8.002  | 8.501  | 8.600  | 9.039  | 73149  | NA        | NM_153197_6_+1  |
| Hbp1          | 6.892  | 6.797  | 6.920  | 6.685  | 6.340  | 6.503  | 6.753  | 6.834  | 7.497  | 7.461  | 73389  | HBP1      | NM_153198_12_-1 |
| Csrnp1        | 5.340  | 5.442  | 5.082  | 4.831  | 6.163  | 6.235  | 6.078  | 5.397  | 5.431  | 5.236  | 215418 | CSRNP1    | NM_153287_9_-1  |
| Npb           | -2.784 | -4.981 | -4.188 | -4.845 | -2.109 | -2.991 | -2.660 | -4.520 | -3.823 | -3.816 | 208990 | NPB       | NM_153288_11_+1 |
| Amot          | 0.756  | -1.460 | 1.380  | 0.400  | -0.283 | -1.377 | 1.581  | 0.800  | 0.899  | 1.100  | 27494  | AMOT      | NM_153319_X_-1  |
| Lats2         | 1.462  | 1.737  | -1.308 | -1.894 | -1.187 | -2.282 | -0.610 | -0.223 | 0.693  | 0.325  | 50523  | LATS2     | NM_153382_14_-1 |
| Tubgcp4       | 2.819  | 2.722  | 3.129  | 2.442  | 2.921  | 2.500  | 3.295  | 2.728  | 3.788  | 4.063  | 51885  | TUBGCP4   | NM_153387_2_+1  |
| Lrfn4         | -4.981 | -1.595 | -1.971 | -1.498 | -0.932 | -1.968 | -3.219 | -3.195 | -3.242 | -3.758 | 225875 | LRFN4     | NM_153388_19_-1 |
| Atp10d        | 1.507  | 2.777  | 3.831  | 5.177  | 2.351  | 2.851  | 3.123  | 4.457  | 3.709  | 5.330  | 231287 | NA        | NM_153389_5_+1  |
| Pxt1          | -2.739 | -4.981 | -4.640 | -4.965 | -4.689 | -4.829 | -3.068 | -4.976 | -2.361 | -4.981 | 69307  | NA        | NM_153390_17_-1 |
| Wdr19         | -0.346 | -0.114 | -1.313 | -1.084 | -0.795 | -0.700 | -0.562 | -0.819 | 1.098  | 1.140  | 213081 | WDR19     | NM_153391_5_+1  |
| Ttc39a        | 2.195  | 1.919  | 6.987  | 7.605  | 1.086  | 0.143  | -1.386 | 0.773  | -2.802 | -3.605 | 230603 | TTC39A    | NM_153392_4_+1  |
| Col23a1       | 0.337  | 2.937  | 4.148  | 1.078  | 2.411  | 0.659  | 2.128  | 0.213  | -2.150 | -2.708 | 237759 | COL23A1   | NM_153393_11_+1 |
| Gpr156        | -4.981 | -4.981 | -0.800 | -1.403 | -0.849 | -2.043 | -4.883 | -2.488 | -4.190 | -3.233 | 239845 | GPR156    | NM_153394_16_+1 |
| Mon2          | 3.516  | 4.145  | 2.929  | 3.370  | 3.712  | 3.677  | 3.679  | 3.505  | 3.590  | 3.551  | 67074  | MON2      | NM_153395_10_-1 |
| Mical3        | -3.237 | -0.179 | 0.574  | 1.533  | 2.379  | 1.563  | 0.748  | -2.165 | -1.400 | -2.448 | 194401 | MICAL3    | NM_153396_6_-1  |
| Adam32        | -4.981 | -4.981 | -4.974 | -4.847 | -4.958 | -4.980 | -4.980 | -4.978 | -4.707 | -2.425 | 353188 | ADAM32    | NM_153397_8_-1  |
| Zbtb24        | 4.605  | 4.507  | 3.888  | 3.855  | 4.212  | 4.137  | 3.919  | 3.982  | 4.058  | 4.055  | 268294 | ZBTB24    | NM_153398_10_+1 |

|               |        |        |        |        |        |        |        |        |        |        |        |           |                 |
|---------------|--------|--------|--------|--------|--------|--------|--------|--------|--------|--------|--------|-----------|-----------------|
| Syne1         | -4.981 | -4.981 | -0.965 | -1.076 | -4.714 | -1.534 | -0.854 | -0.456 | 0.804  | -4.981 | 64009  | SYNE1     | NM_153399_10_-2 |
| P2rx2         | -4.981 | -4.981 | -4.970 | -4.108 | -4.066 | -4.576 | -4.936 | -4.906 | -4.981 | -4.981 | 231602 | P2RX2     | NM_153400_5_-1  |
| Ago3          | 3.347  | 3.121  | 2.753  | 2.661  | 3.709  | 3.069  | 2.749  | 2.376  | 2.795  | 2.534  | 214150 | AGO3      | NM_153402_4_-1  |
| Ago1          | 3.617  | 3.976  | 2.753  | 3.164  | 3.053  | 3.386  | 2.979  | 3.089  | 2.865  | 3.136  | 236511 | AGO1      | NM_153403_4_-1  |
| Liph          | -1.861 | -4.981 | -3.395 | -3.665 | -2.328 | -3.231 | -2.615 | -3.777 | -4.981 | -3.519 | 239759 | LIPH      | NM_153404_16_-1 |
| Rbm45         | 1.840  | 2.061  | 2.251  | 2.357  | 1.359  | 1.938  | 0.892  | 1.166  | 0.907  | 1.231  | 241490 | RBM45     | NM_153405_2_+1  |
| Specc1l       | 4.696  | 4.925  | 5.142  | 5.171  | 5.278  | 5.132  | 5.131  | 5.483  | 5.769  | 6.226  | 74392  | SPECC1L   | NM_153406_10_+1 |
| Csrnp2        | 0.860  | 1.328  | 0.802  | 1.444  | 1.246  | 1.782  | 0.979  | 1.552  | 2.188  | 2.229  | 207785 | CSRNP2    | NM_153407_15_-1 |
| Neurl3        | 1.643  | 0.206  | 6.356  | 6.025  | 7.788  | 7.648  | 7.868  | 7.514  | 8.170  | 7.914  | 214854 | NEURL3    | NM_153408_1_-1  |
| Csrnp3        | -4.599 | -4.981 | -4.947 | -4.843 | -4.981 | -4.981 | -4.834 | -4.962 | -4.981 | -4.878 | 77771  | CSRNP3    | NM_153409_2_+1  |
| Gpsm1         | 1.696  | 1.387  | -0.351 | 1.937  | 1.553  | 1.700  | 0.733  | 0.913  | 0.841  | 1.952  | 67839  | GPSM1     | NM_153410_2_+1  |
| Phldb2        | -4.981 | -4.981 | -4.889 | -4.042 | -4.989 | -3.975 | -3.862 | -3.067 | -4.981 | -4.981 | 208177 | PHLDB2    | NM_153412_16_-1 |
| Dock3         | 0.354  | -1.972 | -0.411 | -1.887 | -1.383 | -2.593 | -1.016 | -2.081 | -1.951 | 0.860  | 208869 | DOCK3     | NM_153413_9_-1  |
| Ints9         | 3.612  | 3.840  | 4.523  | 4.341  | 4.237  | 4.220  | 4.120  | 4.188  | 4.787  | 4.768  | 210925 | INTS9     | NM_153414_14_+1 |
| Pomt2         | 1.888  | 1.330  | 1.599  | 1.746  | 1.406  | 1.496  | 1.533  | 1.824  | 2.631  | 2.810  | 217734 | POMT2     | NM_153415_12_-1 |
| Aaas          | 4.725  | 4.535  | 3.668  | 3.888  | 4.834  | 4.640  | 4.718  | 4.585  | 3.502  | 3.274  | 223921 | AAAS      | NM_153416_15_-1 |
| Trpm6         | -4.981 | -4.981 | -4.981 | -4.981 | -4.952 | -4.952 | -4.778 | -4.859 | -4.981 | -4.981 | 225997 | TRPM6     | NM_153417_19_+1 |
| Grwd1         | 3.993  | 3.825  | 3.847  | 4.278  | 4.006  | 4.086  | 3.577  | 4.122  | 3.086  | 2.911  | 101612 | GRWD1     | NM_153419_7_-1  |
| Pxylp1        | -1.555 | -0.620 | -2.842 | -3.857 | -2.851 | -4.817 | -3.567 | -2.596 | -1.480 | -1.427 | 235534 | PXYLP1    | NM_153420_9_-1  |
| Phc3          | -1.283 | -1.075 | -0.848 | 0.169  | -0.827 | -2.334 | 0.697  | 1.012  | 0.594  | 0.478  | 241915 | PHC3      | NM_153421_3_-1  |
| Pde5a         | 2.637  | 2.660  | 2.198  | 1.143  | -2.031 | -1.815 | -0.768 | -1.444 | -0.042 | 0.873  | 242202 | PDE5A     | NM_153422_3_+1  |
| Wasf2         | 5.745  | 5.853  | 6.046  | 6.036  | 6.371  | 6.378  | 6.646  | 6.365  | 6.699  | 6.787  | 242687 | WASF2     | NM_153423_4_+1  |
| Nphp4         | -1.217 | -2.587 | -1.838 | -2.785 | -0.729 | -2.224 | -1.942 | -2.930 | -1.517 | -0.491 | 260305 | NPHP4     | NM_153424_4_+1  |
| Rtn1          | 0.937  | -0.305 | 4.877  | 3.628  | 6.797  | 6.179  | 5.757  | 4.065  | 3.375  | -0.443 | 104001 | RTN1      | NM_153457_12_-1 |
| Dusp7         | 4.655  | 4.536  | 0.694  | 0.917  | 3.915  | 3.055  | 3.557  | 3.490  | 6.529  | 5.759  | 235584 | DUSP7     | NM_153459_9_+1  |
| Tef           | 3.001  | 2.566  | 2.470  | 1.617  | 3.423  | 2.925  | 2.613  | 1.198  | 0.969  | 0.205  | 21685  | TEF       | NM_153484_15_+1 |
| Ubap2l        | 2.175  | 2.045  | 2.508  | 2.544  | 2.365  | 2.786  | 2.348  | 1.956  | 2.822  | 2.310  | 74383  | NA        | NM_153489_3_-1  |
| Pank2         | 5.810  | 5.880  | 5.391  | 5.495  | 5.688  | 5.688  | 5.619  | 5.422  | 5.537  | 5.501  | 74450  | PANK2     | NM_153501_2_+1  |
| Ankrd23       | 1.608  | 2.234  | 1.463  | 1.202  | 1.142  | 1.025  | 1.104  | 1.101  | 1.955  | 0.994  | 78321  | ANKRD23   | NM_153502_1_-1  |
| Rnf113a1      | 3.134  | 2.519  | 2.383  | 2.340  | 1.599  | 1.742  | 1.695  | 1.644  | 1.449  | 0.898  | 69942  | NA        | NM_153503_X_+1  |
| Rnf183        | -3.668 | -4.981 | -0.869 | -0.988 | -4.970 | -4.958 | -3.598 | -4.960 | -4.981 | -3.853 | 76072  | RNF183    | NM_153504_4_-1  |
| Nckap1l       | 6.231  | 6.232  | 8.507  | 8.505  | 8.351  | 8.312  | 8.097  | 8.215  | 8.861  | 9.090  | 105855 | NCKAP1L   | NM_153505_15_+1 |
| Cpne2         | 5.304  | 4.679  | 5.384  | 5.913  | 3.325  | 3.430  | 3.501  | 3.980  | 3.523  | 3.507  | 234577 | CPNE2     | NM_153507_8_+1  |
| Clstn3        | -4.981 | -4.981 | -4.965 | -4.326 | -3.270 | -4.601 | -4.938 | -3.827 | -2.598 | 0.356  | 232370 | CLSTN3    | NM_153508_6_-1  |
| Pilra         | 4.409  | 3.493  | 2.601  | 3.028  | 3.727  | 4.284  | 6.735  | 6.976  | 7.152  | 7.054  | 231805 | PILRA     | NM_153510_5_-1  |
| Il1f9         | -3.349 | -2.594 | -3.103 | -0.487 | -2.339 | 0.945  | -0.408 | 2.022  | 0.980  | -0.568 | 215257 | IL36G     | NM_153511_2_+1  |
| Kcng3         | -4.981 | -4.981 | -4.336 | -3.527 | -0.549 | -0.784 | -1.901 | -3.796 | -4.190 | -3.853 | 225030 | KCNGB     | NM_153512_17_-1 |
| BC028528      | 5.200  | 5.583  | 7.605  | 7.357  | 4.077  | 4.363  | 5.918  | 6.707  | 6.110  | 6.420  | 229600 | C1orf54   | NM_153513_3_-1  |
| Rhobtb2       | 5.641  | 5.421  | 4.153  | 4.262  | 2.869  | 3.192  | 3.256  | 3.504  | 2.951  | 2.939  | 246710 | RHOBTB2   | NM_153514_14_-1 |
| Ammeccr1l     | 4.541  | 4.484  | 5.471  | 5.487  | 4.716  | 4.930  | 4.848  | 5.033  | 5.073  | 5.490  | 225339 | AMMECCR1L | NM_153515_18_+1 |
| Bcl2l13       | 3.812  | 3.873  | 4.366  | 4.480  | 4.359  | 4.385  | 4.475  | 4.454  | 5.365  | 5.086  | 94044  | BCL2L13   | NM_153516_6_+1  |
| Lrrc41        | 5.120  | 5.378  | 5.605  | 5.591  | 5.292  | 5.230  | 5.116  | 5.220  | 5.893  | 5.961  | 230654 | LRRC41    | NM_153521_4_+1  |
| Tcstv3        | -0.846 | -0.874 | -4.958 | -4.958 | -4.895 | -4.976 | -4.981 | -4.981 | -4.981 | -4.981 | 236219 | NA        | NM_153523_13_+1 |
| Tmem41b       | 4.713  | 3.905  | 4.753  | 4.071  | 4.715  | 4.396  | 4.604  | 3.842  | 4.209  | 4.169  | 233724 | TMEM41B   | NM_153525_7_-1  |
| Insig1        | 6.478  | 7.287  | 4.331  | 4.656  | 3.812  | 4.638  | 4.269  | 5.734  | 5.389  | 6.648  | 231070 | INSIG1    | NM_153526_5_+1  |
| Dnajb13       | 1.808  | 0.608  | 0.753  | 0.812  | 0.481  | 0.121  | 0.362  | 0.479  | 0.261  | -0.035 | 69387  | DNAJB13   | NM_153527_7_-1  |
| Gramd1c       | 2.121  | 2.327  | 2.079  | 2.106  | 1.409  | 1.648  | -0.562 | 1.013  | -0.039 | -0.493 | 207798 | NA        | NM_153528_16_-1 |
| Nrn1          | -1.901 | -4.981 | -4.814 | -0.962 | -0.684 | 1.049  | -3.750 | -2.019 | -4.981 | -3.481 | 68404  | NRN1      | NM_153529_13_-1 |
| Dis3l2        | 4.067  | 3.706  | 4.049  | 4.117  | 4.026  | 4.214  | 3.348  | 3.927  | 4.201  | 4.115  | 208718 | DIS3L2    | NM_153530_1_+1  |
| Zfp280c       | -0.697 | -4.447 | -1.651 | -3.373 | -0.779 | -0.978 | -2.497 | -0.416 | -1.575 | -0.209 | 208968 | ZNF280C   | NM_153532_X_-1  |
| Tns2          | -3.843 | -4.981 | -4.327 | -2.325 | -1.088 | -1.112 | -1.011 | -1.228 | -1.046 | -2.684 | 209039 | TNS2      | NM_153533_15_+1 |
| Fam149a       | -1.120 | -2.239 | 6.993  | 7.083  | 1.529  | 2.175  | 1.591  | 2.909  | -0.053 | 0.122  | 212326 | FAM149A   | NM_153535_8_-1  |
| Phldb1        | 0.256  | -1.295 | 0.352  | 0.440  | 0.097  | -0.699 | 0.670  | -0.224 | -0.083 | 0.708  | 102693 | PHLDB1    | NM_153537_9_-1  |
| Zcchc6        | 5.526  | 5.596  | 6.056  | 5.851  | 6.097  | 6.066  | 6.201  | 6.365  | 6.966  | 7.183  | 214290 | ZCCHC6    | NM_153538_13_-1 |
| Pomgnt2       | -2.901 | -4.981 | -2.125 | -0.962 | -3.210 | -2.832 | -2.744 | -2.367 | -4.981 | -1.474 | 215494 | POMGNT2   | NM_153540_9_-1  |
| Lrrc20        | 0.627  | 1.273  | 1.681  | 1.876  | 1.583  | 1.635  | 1.760  | 2.146  | 4.226  | 3.841  | 216011 | LRRC20    | NM_153542_10_+1 |
| Aldh1l2       | -4.981 | -1.814 | -3.065 | -4.849 | -2.037 | -3.536 | -3.338 | -2.528 | -4.981 | -4.981 | 216188 | ALDH1L2   | NM_153543_10_-1 |
| BC030867      | -4.981 | -4.981 | -1.612 | -0.021 | 0.685  | -1.764 | 0.437  | -0.573 | -0.917 | -2.797 | 217216 | C17orf53  | NM_153544_11_+1 |
| Lrrc45        | 4.979  | 4.885  | 4.968  | 4.986  | 4.464  | 4.698  | 4.489  | 4.689  | 4.792  | 4.851  | 217366 | LRRC45    | NM_153545_11_+1 |
| Mboat1        | -4.981 | -2.353 | 2.876  | 3.344  | 1.689  | 1.060  | 2.828  | 3.120  | 3.554  | 4.090  | 218121 | MBOAT1    | NM_153546_13_+1 |
| Gnl3          | 5.630  | 5.536  | 5.106  | 5.270  | 4.762  | 4.912  | 4.789  | 5.207  | 2.845  | 2.660  | 30877  | GNL3      | NM_153547_14_-1 |
| E430025E21Rik | 3.993  | 4.134  | 4.952  | 5.004  | 4.176  | 4.208  | 4.316  | 4.657  | 5.506  | 5.745  | 223593 | KIAA0196  | NM_153548_15_-1 |
| Dirc2         | 8.312  | 8.464  | 2.643  | 3.116  | 3.976  | 3.877  | 4.248  | 4.596  | 5.420  | 5.403  | 224132 | DIRC2     | NM_153550_16_-1 |
| Dennd1c       | 5.378  | 5.440  | 5.653  | 5.758  | 6.747  | 6.858  | 6.021  | 5.878  | 5.766  | 5.564  | 70785  | DENND1C   | NM_153551_17_-1 |
| Thoc1         | 5.369  | 5.627  | 5.349  | 5.271  | 5.287  | 5.465  | 5.449  | 5.562  | 5.165  | 5.319  | 225160 | THOC1     | NM_153552_18_+1 |
| Aldh18a1      | 1.934  | 1.602  | 1.777  | 2.256  | 0.343  | 1.659  | 0.763  | 0.741  | 0.933  | 1.762  | 56454  | ALDH18A1  | NM_153554_19_-1 |
| Dcaf8         | 6.239  | 6.026  | 6.198  | 6.216  | 6.521  | 6.505  | 6.276  | 6.074  | 6.587  | 6.521  | 98193  | DCAF8     | NM_153555_1_+1  |
| Pms1          | 1.968  | 2.916  | 3.043  | 2.954  | 3.259  | 2.998  | 2.667  | 2.580  | 2.121  | 2.331  | 227099 | PMS1      | NM_153556_1_-1  |
| BC029214      | 5.383  | 5.303  | 3.705  | 3.509  | 4.433  | 4.372  | 4.186  | 4.140  | 3.638  | 3.395  | 227622 | C9orf142  | NM_153557_2_-1  |
| Qsox2         | 1.259  | 2.116  | 1.074  | 0.924  | 0.318  | 0.860  | 0.299  | 0.014  | 0.605  | 1.039  | 227638 | QSOX2     | NM_153559_2_-1  |
| Fam102a       | 1.397  | 0.332  | 3.864  | 3.924  | 4.008  | 4.152  | 3.601  | 3.674  | 3.473  | 3.279  | 98952  | FAM102A   | NM_153560_2_+1  |
| Nudt6         | 1.388  | 0.808  | 1.877  | -0.279 | 1.441  | -1.048 | 1.108  | -1.438 | 1.286  | -1.507 | 229228 | NUDT6     | NM_153561_3_-1  |
| Rrnad1        | 3.948  | 3.910  | 3.786  | 3.731  | 4.095  | 4.088  | 3.698  | 3.749  | 3.643  | 3.481  | 229503 | RRNAD1    | NM_153562_3_-1  |
| Strip1        | 4.417  | 4.807  | 4.802  | 4.858  | 4.965  | 5.040  | 4.944  | 4.839  | 5.366  | 5.312  | 229707 | STRIP1    | NM_153563_3_-1  |

|                |        |        |        |        |        |        |        |        |        |        |        |          |                 |
|----------------|--------|--------|--------|--------|--------|--------|--------|--------|--------|--------|--------|----------|-----------------|
| Gbp5           | 1.263  | 1.502  | 4.127  | 5.522  | 3.336  | 3.974  | 2.892  | 3.819  | 2.636  | 3.305  | 229898 | GBP5     | NM_153564_3_+1  |
| Yrdc           | 5.918  | 5.842  | 5.721  | 5.686  | 5.663  | 5.620  | 5.572  | 5.339  | 5.220  | 4.857  | 230734 | YRDC     | NM_153566_4_+1  |
| Slain2         | 4.056  | 4.323  | 4.805  | 4.220  | 4.446  | 4.134  | 4.596  | 4.476  | 5.775  | 5.469  | 75991  | SLAIN2   | NM_153567_5_+1  |
| Gak            | 4.963  | 4.630  | 6.085  | 5.943  | 6.079  | 5.823  | 6.186  | 6.081  | 7.254  | 7.178  | 231580 | GAK      | NM_153569_5_-1  |
| Noc4l          | 5.206  | 5.246  | 4.847  | 5.052  | 4.777  | 4.773  | 4.916  | 4.984  | 4.575  | 4.424  | 100608 | NOC4L    | NM_153570_5_-1  |
| Hscb           | 4.713  | 4.260  | 3.629  | 3.876  | 4.032  | 3.899  | 4.063  | 3.847  | 3.113  | 2.947  | 100900 | HSCB     | NM_153571_5_-1  |
| Katnal1        | 2.599  | 2.455  | 0.875  | 0.973  | 1.489  | 1.915  | 0.741  | 1.362  | 0.885  | 1.291  | 231912 | KATNAL1  | NM_153572_5_-1  |
| Fkbp14         | -4.981 | -2.681 | -1.066 | 0.125  | -4.859 | -3.076 | -4.835 | -3.237 | -4.981 | -1.361 | 231997 | FKBP14   | NM_153573_6_-1  |
| Fam13a         | -2.178 | -2.353 | -3.694 | -4.908 | -4.467 | -4.940 | -4.125 | -4.894 | -2.989 | -3.816 | 58909  | NA       | NM_153574_6_-1  |
| Cxcl17         | -4.981 | -4.981 | -4.639 | -4.593 | -3.417 | -4.410 | -4.047 | -3.178 | -3.022 | -4.316 | 232983 | CXCL17   | NM_153576_7_-1  |
| Syne4          | -2.573 | -2.883 | -2.696 | -2.225 | -2.334 | -3.125 | -2.518 | -3.411 | -3.043 | -2.360 | 233066 | SYNE4    | NM_153577_7_+1  |
| Nipa1          | -3.336 | -0.741 | 0.418  | 2.127  | 1.185  | 2.041  | 1.204  | 2.484  | -0.304 | 1.780  | 233280 | NIPA1    | NM_153578_7_-1  |
| Sv2b           | -4.166 | -3.291 | -4.980 | -4.980 | -4.971 | -4.799 | -4.945 | -4.761 | -4.981 | -4.804 | 64176  | SV2B     | NM_153579_7_-1  |
| Ino80e         | 5.635  | 5.578  | 5.042  | 5.074  | 5.356  | 5.284  | 5.063  | 4.869  | 4.761  | 4.346  | 233875 | INO80E   | NM_153580_7_-1  |
| Cmtm4          | -0.160 | 0.185  | 1.808  | 2.103  | 0.178  | -1.304 | 0.389  | 0.394  | -0.391 | 0.445  | 97487  | CMTM4    | NM_153582_8_-1  |
| Atg4d          | 4.942  | 4.810  | 4.217  | 4.383  | 4.362  | 4.316  | 4.967  | 4.943  | 6.506  | 5.782  | 235040 | ATG4D    | NM_153583_9_+1  |
| Fam214a        | 1.197  | -0.758 | 1.940  | 2.431  | 3.057  | 3.431  | 2.164  | 0.262  | 2.665  | 2.193  | 235493 | FAM214A  | NM_153584_9_+1  |
| Cnot10         | 4.769  | 4.875  | 4.723  | 4.693  | 4.679  | 4.802  | 4.520  | 5.014  | 4.933  | 4.866  | 78893  | CNOT10   | NM_153585_9_-1  |
| Rbm41          | 2.826  | 2.423  | 3.376  | 2.773  | 2.741  | 3.044  | 2.671  | 2.708  | 3.345  | 3.610  | 237073 | RBM41    | NM_153586_X_-1  |
| Rps6ka5        | 4.282  | 4.253  | 3.727  | 3.843  | 4.054  | 3.826  | 4.018  | 3.944  | 3.604  | 4.067  | 73086  | RPS6KA5  | NM_153587_12_-1 |
| Mkl2           | -4.904 | -4.868 | -2.961 | -2.941 | -3.689 | -1.128 | -2.801 | -4.053 | -4.691 | -4.858 | 239719 | MKL2     | NM_153588_16_+1 |
| Ano2           | -4.981 | -1.083 | -4.981 | -4.981 | -4.981 | -4.981 | -4.981 | -4.981 | -4.981 | -4.981 | 243634 | ANO2     | NM_153589_6_+1  |
| Klre1          | -0.156 | 0.627  | -0.004 | -0.181 | 0.719  | 0.847  | 0.633  | -0.153 | -3.189 | -4.981 | 243655 | NA       | NM_153590_6_+1  |
| Nars2          | 3.414  | 3.439  | 2.953  | 3.182  | 2.693  | 2.851  | 2.404  | 2.953  | 2.132  | 2.243  | 244141 | NARS2    | NM_153591_7_+1  |
| Erlin2         | 4.131  | 4.563  | 6.204  | 6.338  | 5.399  | 5.532  | 5.343  | 5.674  | 5.644  | 5.947  | 244373 | ERLIN2   | NM_153592_8_+1  |
| Pcmt2          | 4.695  | 4.847  | 4.516  | 4.420  | 4.349  | 4.589  | 4.754  | 5.046  | 5.273  | 5.813  | 245867 | PCMT2    | NM_153594_2_+1  |
| Ttc41          | 1.306  | 1.776  | -2.884 | -4.235 | -4.123 | -3.792 | -4.101 | -3.316 | -4.978 | -4.588 | 103220 | NA       | NM_153595_10_+1 |
| Tmem17         | 2.548  | 2.556  | 1.558  | 1.359  | 0.930  | 0.939  | 0.446  | 1.101  | 0.429  | -0.275 | 103765 | TMEM17   | NM_153596_11_+1 |
| Trpt1          | 2.983  | 3.006  | 0.781  | 0.930  | 2.049  | 2.100  | 1.199  | 0.796  | -0.896 | 0.093  | 107328 | TRPT1    | NM_153597_19_+1 |
| Cdk8           | 3.474  | 3.504  | 3.043  | 3.003  | 3.122  | 3.528  | 3.258  | 3.281  | 3.386  | 3.572  | 264064 | CDK8     | NM_153599_5_+1  |
| Ttc26          | -1.579 | -0.817 | -4.255 | -3.187 | -2.129 | -3.608 | -4.312 | -4.827 | -2.600 | -1.331 | 264134 | TTC26    | NM_153600_6_+1  |
| Cpt1c          | -0.139 | 0.335  | 0.259  | 0.015  | -0.973 | -2.484 | -0.978 | -0.796 | -2.717 | -2.635 | 78070  | CPT1C    | NM_153679_7_-1  |
| Snx17          | 6.926  | 6.920  | 6.932  | 7.005  | 6.719  | 6.619  | 6.812  | 6.834  | 7.171  | 6.927  | 266781 | SNX17    | NM_153680_5_+1  |
| Dnmt3a         | -0.619 | 2.043  | 1.025  | 0.161  | 4.859  | 5.515  | 3.989  | 2.862  | -2.070 | -1.399 | 13435  | DNMT3A   | NM_153743_12_+1 |
| Prkag3         | -3.090 | -3.262 | -4.276 | -3.475 | -4.120 | -4.392 | -4.140 | -4.954 | -2.563 | -4.981 | 241113 | PRKAG3   | NM_153744_1_-1  |
| Mill2          | -2.539 | -0.562 | -4.962 | -4.962 | -4.967 | -4.761 | -4.962 | -4.981 | -4.981 | -3.569 | 243864 | MICB     | NM_153760_7_+1  |
| Mill2          | -4.530 | 1.000  | -4.942 | -4.942 | -4.981 | -4.981 | -4.975 | -4.971 | -4.981 | -4.869 | 243864 | MICB     | NM_153761_7_+1  |
| Rnf26          | 3.695  | 3.602  | 3.561  | 3.839  | 3.661  | 3.670  | 3.764  | 3.634  | 4.382  | 3.899  | 213211 | RNF26    | NM_153762_9_-1  |
| Ipo9           | 5.789  | 5.876  | 4.539  | 4.759  | 5.192  | 5.396  | 4.832  | 5.397  | 5.358  | 5.646  | 226432 | IPO9     | NM_153774_1_-1  |
| Ctu2           | 5.128  | 4.899  | 4.916  | 5.022  | 5.265  | 5.143  | 5.203  | 5.047  | 5.082  | 4.540  | 66965  | CTU2     | NM_153775_8_+1  |
| Tmem121        | -2.178 | -2.895 | -4.959 | -3.764 | -4.224 | -3.595 | -4.744 | -3.422 | -4.981 | -3.853 | 69195  | TMEM121  | NM_153776_12_+1 |
| Lrrc56         | -4.420 | -1.206 | -2.285 | -2.980 | -4.880 | -2.584 | -2.664 | -2.150 | -4.904 | -2.663 | 70552  | LRRC56   | NM_153777_7_+1  |
| Atoh8          | -2.573 | -2.126 | -4.413 | -2.793 | -2.337 | -2.570 | -4.013 | -2.414 | -4.981 | -4.981 | 71093  | ATOH8    | NM_153778_6_-1  |
| Aifm2          | -2.362 | -1.620 | -2.894 | -2.160 | -2.717 | -4.941 | -4.514 | -2.448 | -4.960 | -2.951 | 71361  | AIFM2    | NM_153779_10_+1 |
| 2610044015Rik8 | 3.986  | 2.871  | 2.695  | 1.965  | 2.967  | 1.775  | 2.864  | 1.992  | 2.269  | 2.006  | 72139  | NA       | NM_153780_8_-1  |
| Pygb           | 3.865  | 4.203  | 5.187  | 5.213  | 5.262  | 4.999  | 4.873  | 4.861  | 5.288  | 5.127  | 110078 | PYGB     | NM_153781_2_+1  |
| Fam20a         | -1.987 | -3.267 | -4.992 | -3.585 | -4.157 | -4.382 | 0.845  | 1.584  | 1.567  | 1.387  | 208659 | FAM20A   | NM_153782_11_-1 |
| Paox           | 4.888  | 4.868  | 3.464  | 3.620  | 5.518  | 5.496  | 4.832  | 4.529  | 4.155  | 4.150  | 212503 | PAOX     | NM_153783_7_+1  |
| Ccdc64b        | -4.981 | -4.981 | -3.962 | -4.580 | -3.762 | -4.925 | -4.923 | -2.661 | -2.834 | -4.981 | 212733 | BICDL2   | NM_153784_17_+1 |
| Cdkl3          | -0.721 | 0.354  | 0.460  | -3.499 | -1.398 | -1.877 | -4.845 | -3.943 | -1.190 | -4.072 | 213084 | CDKL3    | NM_153785_11_+1 |
| Bclaf1         | 3.915  | 4.160  | 4.324  | 4.595  | 4.325  | 4.085  | 3.910  | 4.203  | 3.667  | 3.583  | 72567  | BCLAF1   | NM_153787_10_+1 |
| Acap1          | 6.718  | 6.871  | 3.983  | 4.263  | 6.666  | 6.687  | 5.203  | 5.375  | 3.187  | 1.621  | 216859 | ACAP1    | NM_153788_11_-1 |
| Myli1          | 3.051  | 2.295  | 4.106  | 5.329  | 4.192  | 4.807  | 4.613  | 5.300  | 4.029  | 4.814  | 218203 | MYLI1    | NM_153789_13_+1 |
| Scarf2         | -2.233 | -4.981 | -3.287 | -3.590 | -4.811 | -3.607 | -3.438 | -3.472 | -0.832 | -1.686 | 224024 | SCARF2   | NM_153790_16_+1 |
| Flywch1        | 1.980  | 2.207  | 2.691  | 2.160  | 2.542  | 2.204  | 2.701  | 1.909  | 3.170  | 2.348  | 224613 | FLYWCH1  | NM_153791_17_-1 |
| Traf7          | 1.979  | 2.432  | 2.012  | 1.234  | 2.102  | 1.646  | 1.249  | 1.654  | 2.649  | 3.176  | 224619 | TRAF7    | NM_153792_17_-1 |
| Rel2           | 1.817  | 0.509  | 1.674  | 1.028  | 0.803  | 0.366  | -0.139 | -0.577 | -2.387 | -1.939 | 225392 | RELL2    | NM_153793_18_+1 |
| Fam210a        | 4.554  | 3.728  | 4.070  | 4.124  | 3.672  | 3.689  | 3.700  | 3.685  | 3.475  | 3.995  | 108654 | FAM210A  | NM_153794_18_-1 |
| Fermt3         | 7.253  | 7.242  | 8.214  | 8.391  | 8.181  | 8.175  | 8.223  | 8.301  | 9.066  | 8.857  | 108101 | FERMT3   | NM_153795_19_-1 |
| Peo1           | 3.154  | 3.382  | 2.955  | 3.026  | 2.842  | 2.961  | 2.426  | 2.594  | 2.835  | 2.606  | 226153 | C10orf2  | NM_153796_19_+1 |
| Polr2b         | 5.269  | 5.211  | 5.274  | 5.410  | 5.660  | 5.620  | 5.567  | 5.847  | 6.149  | 6.129  | 231329 | POLR2B   | NM_153798_5_+1  |
| Edc3           | 4.288  | 4.576  | 4.742  | 4.878  | 4.844  | 4.745  | 4.540  | 4.517  | 5.352  | 5.168  | 353190 | EDC3     | NM_153799_9_+1  |
| Arhgap22       | 1.065  | -2.353 | 6.678  | 6.489  | 4.968  | 4.806  | 4.338  | 3.724  | -0.668 | -0.387 | 239027 | ARHGA22  | NM_153800_14_+1 |
| Zfp128         | 0.542  | 1.298  | 2.134  | 1.668  | 2.898  | 2.715  | 2.538  | 2.441  | 3.179  | 3.208  | 243833 | ZNF8     | NM_153802_7_+1  |
| Plekkg3        | 1.768  | 2.195  | 2.858  | 2.397  | 4.128  | 3.855  | 3.940  | 3.765  | 5.587  | 5.424  | 263406 | PLEKHG3  | NM_153804_12_+1 |
| Pkn3           | 1.945  | 2.559  | 2.325  | 2.263  | 1.084  | 1.295  | 1.563  | 1.196  | 1.306  | 1.435  | 263803 | PKN3     | NM_153805_2_+1  |
| Dnttip2        | 6.020  | 6.032  | 5.810  | 5.918  | 6.013  | 6.034  | 6.031  | 5.978  | 5.760  | 5.896  | 99480  | DNTTIP2  | NM_153806_3_+1  |
| Acsf2          | 3.060  | 2.865  | 2.601  | 2.994  | 3.023  | 3.748  | 2.493  | 3.399  | 2.163  | 3.020  | 264895 | ACSF2    | NM_153807_11_-1 |
| Smc5           | 1.716  | 3.467  | 3.986  | 4.261  | 2.823  | 4.411  | 3.230  | 3.996  | 3.487  | 3.731  | 226026 | SMC5     | NM_153808_19_-1 |
| Arhgap15       | 6.516  | 6.884  | 7.129  | 7.151  | 7.496  | 7.320  | 7.225  | 7.056  | 7.734  | 7.535  | 76117  | ARHGAP15 | NM_153820_2_+1  |
| Cpne1          | 3.666  | 2.350  | 4.165  | 4.226  | 4.234  | 4.155  | 4.780  | 3.508  | 5.049  | 4.318  | 266692 | CPNE1    | NM_170588_2_-1  |
| Cpne1          | 5.120  | 4.917  | 6.593  | 5.556  | 6.212  | 5.267  | 5.874  | 5.291  | 7.059  | 6.274  | 266692 | CPNE1    | NM_170590_2_-1  |
| Nupl1          | 3.823  | 3.941  | 4.973  | 5.182  | 4.699  | 4.427  | 4.514  | 4.579  | 5.144  | 5.106  | 71844  | NUP58    | NM_170591_14_-1 |
| Ntmt1          | 5.201  | 5.138  | 4.597  | 4.596  | 4.449  | 4.294  | 4.409  | 4.188  | 3.858  | 3.668  | 66617  | NTMT1    | NM_170592_2_+1  |

|          |        |        |        |        |        |        |        |        |        |        |        |         |                 |
|----------|--------|--------|--------|--------|--------|--------|--------|--------|--------|--------|--------|---------|-----------------|
| Creg2    | -2.164 | -4.981 | -3.227 | -2.588 | -2.906 | -3.769 | -1.265 | 0.115  | 1.083  | 0.796  | 263764 | CREG2   | NM_170597_1_-1  |
| Rbm12    | 1.779  | 3.135  | 1.882  | 1.539  | 2.248  | 1.310  | 2.990  | 1.587  | 1.836  | 2.237  | 75710  | RBM12   | NM_170598_2_-1  |
| Igsf11   | -1.327 | -4.981 | -4.969 | -4.716 | -4.896 | -4.157 | -4.967 | -4.039 | -4.981 | -4.981 | 207683 | IGSF11  | NM_170599_16_+1 |
| Rps15a   | 8.356  | 8.269  | 8.726  | 8.484  | 8.628  | 8.492  | 8.784  | 8.405  | 7.337  | 7.107  | 267019 | RPS15A  | NM_170669_7_-1  |
| Mycbpap  | 0.869  | 0.813  | -3.439 | -2.027 | -3.225 | -3.841 | -4.247 | -4.081 | -4.981 | -4.227 | 104601 | MYCBPAP | NM_170671_11_-1 |
| Cpne9    | -4.981 | -2.997 | -2.240 | -2.931 | -3.150 | -4.302 | -4.257 | -4.829 | -2.919 | -2.160 | 211232 | CPNE9   | NM_170673_6_+1  |
| Abcc10   | 1.695  | 1.550  | 2.324  | 2.415  | 2.219  | 2.221  | 1.606  | 2.333  | 2.131  | 3.382  | 224814 | ABCC10  | NM_170680_17_-1 |
| Cpne7    | -4.981 | -4.981 | -4.940 | -4.940 | -3.342 | -4.532 | -3.400 | -4.597 | -2.989 | -4.981 | 102278 | CPNE7   | NM_170684_8_+1  |
| Cd40     | -0.187 | -4.981 | 1.457  | 1.970  | 2.323  | 1.857  | 1.535  | 2.209  | 1.604  | 1.744  | 21939  | CD40    | NM_170702_2_+1  |
| Cd40     | 0.162  | -2.701 | 4.064  | 3.747  | 4.473  | 3.931  | 4.121  | 3.947  | 3.328  | 3.410  | 21939  | CD40    | NM_170703_2_+1  |
| Cd40     | 0.584  | -1.125 | 3.106  | 2.975  | 2.705  | 2.689  | 2.624  | 2.517  | 1.919  | 1.997  | 21939  | CD40    | NM_170704_2_+1  |
| Fam134a  | 4.331  | 4.553  | 4.704  | 4.590  | 4.444  | 4.550  | 4.683  | 5.298  | 5.915  | 5.763  | 227298 | FAM134A | NM_170755_1_+1  |
| Spata2   | 4.516  | 4.257  | 4.579  | 4.421  | 4.695  | 4.639  | 4.449  | 4.308  | 5.110  | 4.866  | 263876 | SPATA2  | NM_170756_2_-1  |
| Ccdc186  | 4.663  | 4.528  | 4.334  | 3.791  | 4.402  | 4.485  | 4.053  | 3.926  | 3.738  | 3.893  | 213993 | CCDC186 | NM_170757_19_-1 |
| Cd300a   | 7.467  | 7.620  | 7.099  | 6.985  | 8.571  | 8.933  | 8.970  | 9.351  | 9.596  | 9.797  | 217303 | CD300A  | NM_170758_11_+1 |
| Zfp628   | 1.579  | 1.548  | 1.660  | 1.272  | 1.947  | 1.455  | 1.588  | 1.110  | 1.772  | 1.414  | 232816 | ZNF628  | NM_170759_7_+1  |
| U2af114  | 6.110  | 6.125  | 5.209  | 5.205  | 5.550  | 5.660  | 5.551  | 5.407  | 4.581  | 4.484  | 233073 | NA      | NM_170760_7_+1  |
| Elof1    | 6.070  | 5.892  | 5.491  | 5.194  | 5.492  | 5.347  | 5.698  | 5.512  | 5.294  | 5.002  | 66126  | ELOF1   | NM_170777_9_-1  |
| Dpyd     | -4.981 | -4.981 | -4.981 | -4.981 | -4.986 | -4.629 | -4.981 | -4.981 | -4.981 | -4.981 | 99586  | DPYD    | NM_170778_3_+1  |
| Wwc1     | -4.981 | -4.981 | -4.978 | -4.410 | -3.819 | -4.944 | -4.785 | -3.193 | -4.981 | -4.981 | 211652 | WWC1    | NM_170779_11_-1 |
| Cntf     | -4.981 | -4.981 | -3.969 | -4.160 | -4.834 | -4.977 | -4.324 | -4.638 | -3.062 | -4.724 | 12803  | CNTF    | NM_170786_19_-1 |
| Cldnd1   | 0.652  | -1.628 | -1.658 | 0.851  | -3.158 | -4.337 | -0.754 | -0.317 | -2.455 | -2.486 | 224250 | CLDND1  | NM_171826_16_+1 |
| Iars     | 4.393  | 4.504  | 5.850  | 6.033  | 4.945  | 5.057  | 5.206  | 5.608  | 5.544  | 5.764  | 105148 | IARS    | NM_172015_13_+1 |
| Tmem18   | 3.647  | 3.778  | 3.894  | 4.334  | 3.752  | 4.128  | 3.093  | 3.781  | 3.800  | 4.242  | 211986 | NA      | NM_172049_12_+1 |
| Cd300e   | 1.698  | -0.082 | 5.102  | 3.784  | 3.217  | 2.568  | 6.827  | 6.466  | 4.749  | 3.686  | 217306 | CD300E  | NM_172050_11_-1 |
| Tmcc3    | -1.470 | 1.690  | -0.481 | 0.246  | 0.788  | -0.832 | 0.792  | 0.710  | 0.725  | -0.006 | 319880 | TMCC3   | NM_172051_10_+1 |
| Txnec9   | 6.330  | 6.499  | 6.191  | 6.265  | 6.047  | 6.034  | 5.943  | 6.010  | 5.606  | 5.875  | 98258  | TXNDC9  | NM_172054_1_-1  |
| Rpl32    | 9.825  | 9.750  | 10.466 | 10.349 | 10.108 | 9.985  | 10.343 | 10.220 | 9.205  | 9.089  | 19951  | NA      | NM_172086_6_-1  |
| Pddc1    | 6.120  | 5.968  | 5.228  | 5.153  | 5.162  | 5.225  | 5.020  | 5.161  | 5.402  | 5.148  | 213350 | PDDC1   | NM_172116_7_-1  |
| Entpd6   | 3.777  | 3.736  | 4.915  | 5.145  | 4.895  | 6.034  | 4.835  | 5.051  | 4.481  | 4.282  | 12497  | ENTPD6  | NM_172117_2_+1  |
| Myl9     | 0.294  | -0.181 | 0.547  | 0.526  | 0.222  | 0.148  | 0.944  | 1.002  | 1.303  | 1.983  | 98932  | MYL9    | NM_172118_2_+1  |
| Vps41    | 5.790  | 5.895  | 6.625  | 6.322  | 6.101  | 6.147  | 6.123  | 6.249  | 6.434  | 6.579  | 218035 | VPS41   | NM_172120_13_+1 |
| Zc3h3    | 2.039  | 1.568  | 2.681  | 2.468  | 2.555  | 2.428  | 2.760  | 2.745  | 4.279  | 3.761  | 223642 | ZC3H3   | NM_172121_15_-1 |
| Crocc    | -1.239 | 0.152  | -2.327 | -4.533 | -0.267 | -1.545 | -2.720 | -2.192 | 0.581  | -2.322 | 230872 | CROCC   | NM_172122_4_-1  |
| B3gat2   | -0.165 | -0.136 | 0.318  | -0.690 | -0.321 | -0.289 | -0.611 | -0.574 | 0.300  | 0.657  | 280645 | B3GAT2  | NM_172124_1_+1  |
| Adam1a   | -0.607 | -1.459 | -1.131 | -0.778 | -0.699 | -0.917 | -1.582 | -1.206 | -0.515 | -0.302 | 280668 | NA      | NM_172126_5_-1  |
| Kdm4b    | 4.348  | 4.255  | 4.131  | 4.252  | 4.347  | 4.362  | 3.926  | 4.148  | 4.604  | 4.751  | 193796 | KDM4B   | NM_172132_17_+1 |
| Adap2    | 3.522  | 2.880  | 4.014  | 3.978  | 3.519  | 3.371  | 3.938  | 3.989  | 3.353  | 3.333  | 216991 | ADAP2   | NM_172133_11_+1 |
| Pdxk     | 4.318  | 4.312  | 5.310  | 5.495  | 6.396  | 6.385  | 5.960  | 5.874  | 5.561  | 5.844  | 216134 | PDXK    | NM_172134_10_-1 |
| Mterf1a  | -2.059 | 0.512  | 0.602  | -0.625 | 0.265  | -1.482 | -0.892 | -1.351 | 0.853  | -2.588 | 545725 | MTERF1  | NM_172135_5_-1  |
| Nfkbid   | 7.175  | 7.066  | 5.879  | 5.587  | 7.935  | 7.879  | 7.204  | 6.516  | 5.460  | 5.768  | 243910 | NFKBID  | NM_172142_7_+1  |
| Ppp2r3a  | -3.235 | -2.744 | -2.377 | -2.976 | -3.427 | -4.213 | -2.728 | -1.772 | -1.628 | -1.526 | 235542 | PPP2R3A | NM_172144_9_-1  |
| Eva1b    | 2.935  | 2.599  | 3.025  | 3.038  | 3.941  | 3.530  | 3.413  | 2.852  | 1.271  | 1.731  | 230752 | EVA1B   | NM_172145_4_+1  |
| Ppat     | 3.431  | 3.650  | 4.232  | 4.560  | 4.458  | 4.553  | 4.040  | 4.377  | 3.144  | 3.551  | 231327 | PPAT    | NM_172146_5_-1  |
| Plb1     | -1.636 | -4.981 | -1.890 | -0.716 | -2.645 | -1.223 | -3.790 | -4.098 | -4.981 | -4.981 | 665270 | PLB1    | NM_172147_5_+1  |
| B9d2     | 6.729  | 6.547  | 5.632  | 5.491  | 6.659  | 6.762  | 6.115  | 5.871  | 5.538  | 5.338  | 232987 | B9D2    | NM_172148_7_+1  |
| Bnip1    | 5.531  | 5.325  | 4.518  | 4.687  | 4.371  | 4.437  | 3.641  | 4.120  | 3.053  | 3.111  | 224630 | BNIP1   | NM_172149_17_+1 |
| Ift52    | 6.107  | 6.101  | 6.060  | 5.833  | 6.040  | 6.068  | 5.774  | 5.631  | 5.517  | 5.324  | 245866 | IFT52   | NM_172150_2_+1  |
| Zdhhc8   | 2.812  | 2.715  | 2.376  | 2.464  | 2.810  | 2.537  | 2.079  | 2.093  | 2.430  | 2.892  | 27801  | ZDHHC8  | NM_172151_16_-1 |
| Lcorl    | -4.694 | -4.451 | 0.210  | 1.002  | -2.574 | -2.952 | -2.371 | 0.282  | -3.778 | 0.337  | 209707 | LCORL   | NM_172153_5_-1  |
| Lcor     | 2.716  | 2.336  | 2.548  | 2.195  | 3.118  | 2.717  | 2.384  | 1.546  | 2.127  | 1.650  | 212391 | LCOR    | NM_172154_19_+1 |
| Irak2    | 4.529  | 4.860  | 5.205  | 5.034  | 4.968  | 4.721  | 5.215  | 5.435  | 6.121  | 5.738  | 108960 | IRAK2   | NM_172161_6_+1  |
| Hinfp    | 2.893  | 2.841  | 3.696  | 3.579  | 3.138  | 2.845  | 2.662  | 2.681  | 3.098  | 3.661  | 102423 | HINFP   | NM_172162_9_-1  |
| Nox1     | -2.711 | -0.988 | -3.377 | -4.142 | -4.341 | -4.519 | -3.850 | -4.634 | -4.981 | -3.209 | 237038 | NOX1    | NM_172203_X_-1  |
| Sbsn     | -1.981 | -4.981 | -1.767 | -4.607 | -0.696 | -3.480 | -1.726 | -4.928 | -1.288 | -3.942 | 282619 | SBSN    | NM_172205_7_+1  |
| Mrpl21   | 5.388  | 5.380  | 4.937  | 4.940  | 4.830  | 4.946  | 5.159  | 4.801  | 4.100  | 4.098  | 353242 | MRPL21  | NM_172252_19_+1 |
| Twistnb  | 5.649  | 5.518  | 5.790  | 5.689  | 5.588  | 5.592  | 5.894  | 5.486  | 5.138  | 5.279  | 28071  | TWISTNB | NM_172253_12_+1 |
| Dph3     | 5.413  | 5.475  | 5.316  | 5.247  | 4.633  | 4.549  | 5.163  | 5.136  | 4.474  | 4.456  | 105638 | DPH3    | NM_172254_14_-1 |
| Wdr11    | 4.111  | 4.155  | 5.691  | 5.496  | 5.708  | 5.910  | 4.978  | 4.911  | 5.314  | 5.711  | 207425 | WDR11   | NM_172255_7_+1  |
| Dync2li1 | 3.838  | 4.193  | 2.809  | 3.019  | -4.590 | -2.629 | -2.527 | -0.111 | 1.941  | 2.355  | 213575 | DYNC2L1 | NM_172256_17_+1 |
| Sidt2    | 5.446  | 5.341  | 4.959  | 4.883  | 5.498  | 5.557  | 5.478  | 6.203  | 7.768  | 7.777  | 214597 | SIDT2   | NM_172257_9_-1  |
| Slc36a3  | -0.709 | -1.116 | 1.825  | 1.994  | 1.968  | 2.021  | 1.055  | 0.903  | -1.227 | -1.385 | 215332 | SLC36A3 | NM_172258_11_-1 |
| Myl6b    | -2.185 | -4.981 | -2.183 | -3.250 | -3.823 | -4.373 | -3.114 | -4.018 | -4.981 | -3.690 | 216459 | MYL6B   | NM_172259_10_-1 |
| Cep68    | 3.148  | 2.725  | 3.180  | 2.968  | 3.332  | 3.172  | 3.371  | 3.274  | 2.256  | 2.706  | 216543 | CEP68   | NM_172260_11_-1 |
| Ppp1r9b  | 3.841  | 3.552  | 4.259  | 4.079  | 4.237  | 4.050  | 4.820  | 4.459  | 5.413  | 5.369  | 217124 | PPP1R9B | NM_172261_11_+1 |
| Kdm1b    | 5.958  | 5.537  | 4.800  | 4.704  | 4.729  | 4.322  | 4.240  | 3.729  | 4.141  | 4.288  | 218214 | NA      | NM_172262_13_+1 |
| Pde8b    | 1.322  | 0.115  | 3.198  | 3.199  | 1.810  | 1.959  | 2.001  | 1.592  | 3.308  | 3.314  | 218461 | PDE8B   | NM_172263_13_-1 |
| Chdh     | 4.465  | 3.973  | -2.410 | -3.914 | -4.537 | -3.085 | -4.090 | -1.836 | -1.120 | -2.273 | 218865 | CHDH    | NM_172264_14_+1 |
| Eif2b5   | 4.922  | 5.083  | 5.351  | 5.480  | 5.275  | 5.218  | 5.309  | 5.485  | 5.546  | 5.351  | 224045 | EIF2B5  | NM_172265_16_+1 |
| Lpgat1   | 4.561  | 4.893  | 4.353  | 4.155  | 4.034  | 3.866  | 3.967  | 3.929  | 3.858  | 4.665  | 226856 | LPGAT1  | NM_172266_1_+1  |
| Phyh1    | -4.981 | -4.981 | -1.810 | -3.542 | -1.128 | -2.642 | -0.769 | 0.419  | -1.579 | -2.988 | 227696 | PHYH1   | NM_172267_2_+1  |
| Nup214   | 5.127  | 5.176  | 5.500  | 5.549  | 5.759  | 5.708  | 5.452  | 5.397  | 5.433  | 5.166  | 227720 | NUP214  | NM_172268_2_+1  |
| Vps18    | 3.286  | 3.480  | 4.649  | 4.549  | 5.069  | 4.685  | 4.547  | 4.348  | 4.765  | 4.754  | 228545 | VPS18   | NM_172269_2_+1  |
| Pars2    | 0.430  | 1.169  | 0.272  | 1.088  | 1.751  | 1.080  | 1.474  | 1.143  | 1.498  | 0.936  | 230577 | PARS2   | NM_172272_4_+1  |

|               |        |        |        |        |        |        |        |        |        |        |        |           |                 |
|---------------|--------|--------|--------|--------|--------|--------|--------|--------|--------|--------|--------|-----------|-----------------|
| Cc2d2a        | -2.948 | -4.981 | 0.076  | 1.121  | 0.878  | -0.284 | -0.698 | -3.327 | -4.981 | -2.261 | 231214 | CC2D2A    | NM_172274_5_+1  |
| Trafd1        | 2.224  | 1.701  | 5.663  | 5.640  | 4.304  | 3.175  | 4.545  | 4.413  | 5.961  | 5.515  | 231712 | TRAFD1    | NM_172275_5_-1  |
| Sfswap        | 3.691  | 4.260  | 3.792  | 3.839  | 4.458  | 4.377  | 4.168  | 3.972  | 3.999  | 3.924  | 231769 | SFSWAP    | NM_172276_5_+1  |
| Snx8          | 0.810  | 0.544  | 4.190  | 4.107  | 3.638  | 3.264  | 4.999  | 4.562  | 3.360  | 3.420  | 231834 | SNX8      | NM_172277_5_-1  |
| Mark4         | -0.376 | 0.159  | 0.293  | -0.056 | 0.635  | -0.150 | 0.839  | 0.526  | 2.582  | 2.063  | 232944 | MARK4     | NM_172279_7_-1  |
| Emsy          | 2.883  | 3.157  | 3.797  | 3.330  | 4.190  | 3.853  | 3.597  | 3.691  | 4.503  | 4.490  | 233545 | EMSY      | NM_172280_7_-1  |
| Rnf40         | 4.456  | 4.059  | 4.876  | 4.810  | 5.652  | 5.352  | 5.208  | 5.088  | 6.201  | 5.698  | 233900 | RNF40     | NM_172281_7_+1  |
| Tmco3         | 3.290  | 3.565  | 3.947  | 3.971  | 3.048  | 3.525  | 2.889  | 3.693  | 3.560  | 3.946  | 234076 | TMCO3     | NM_172282_8_+1  |
| Fuk           | 1.202  | 1.453  | 2.183  | 2.434  | 2.619  | 2.301  | 2.298  | 0.988  | 2.845  | 2.217  | 234730 | FUK       | NM_172283_8_-1  |
| Ddx19b        | 3.616  | 3.984  | 4.106  | 4.170  | 3.802  | 3.848  | 3.583  | 3.727  | 3.619  | 3.659  | 234733 | DDX19B    | NM_172284_8_-1  |
| Plcg2         | 6.430  | 6.580  | 7.277  | 7.293  | 7.565  | 7.540  | 7.906  | 7.874  | 8.852  | 8.830  | 234779 | PLCG2     | NM_172285_8_+1  |
| 6430548M08Rik | -1.180 | -4.456 | -2.566 | -1.640 | -0.743 | -4.697 | 0.557  | -0.042 | 1.828  | 0.349  | 234797 | KIAA0513  | NM_172286_8_+1  |
| Spire2        | -3.843 | -4.981 | -1.048 | -1.514 | -3.259 | -4.314 | -4.042 | -3.042 | -4.981 | -4.981 | 234857 | SPIRE2    | NM_172287_8_+1  |
| Nup133        | 3.504  | 3.452  | 3.212  | 3.273  | 3.911  | 3.806  | 3.924  | 4.193  | 4.235  | 4.147  | 234865 | NUP133    | NM_172288_8_-1  |
| Slc36a4       | 1.634  | 1.470  | 0.983  | 1.273  | 1.409  | 1.346  | 1.369  | 1.579  | 3.223  | 3.515  | 234967 | SLC36A4   | NM_172289_9_+1  |
| Foxred1       | -0.170 | -1.351 | -0.267 | -2.098 | -1.275 | 0.375  | 0.378  | -1.240 | 0.557  | -0.939 | 235169 | FOXRED1   | NM_172291_9_-1  |
| Pced1b        | 1.374  | 0.893  | 0.281  | 0.015  | 0.099  | 0.141  | 0.455  | 0.893  | 1.356  | 0.841  | 239647 | PCED1B    | NM_172293_15_+1 |
| Sulf1         | -4.167 | -3.898 | -4.874 | -4.878 | -4.924 | -4.877 | -4.803 | -4.985 | -4.981 | -4.981 | 240725 | SULF1     | NM_172294_1_+1  |
| Mab21l3       | -1.365 | -4.981 | 4.503  | 4.492  | -4.962 | -4.476 | -2.554 | -3.056 | -4.981 | -4.981 | 242125 | MAB21L3   | NM_172295_3_-1  |
| Ccdc9         | 4.189  | 3.936  | 4.246  | 4.053  | 4.407  | 4.157  | 4.865  | 4.159  | 4.885  | 4.290  | 243846 | CCDC9     | NM_172297_7_-1  |
| Tshz3         | -0.769 | 0.009  | -1.596 | 0.414  | -0.098 | 1.703  | -3.080 | -2.760 | -4.981 | -4.981 | 243931 | TSHZ3     | NM_172298_7_+1  |
| Ube2z         | 4.460  | 4.580  | 5.621  | 5.696  | 5.322  | 5.341  | 5.145  | 5.104  | 5.433  | 5.426  | 268470 | UBE2Z     | NM_172300_11_-1 |
| Ccnb1         | -0.235 | 1.630  | 4.138  | 5.053  | 4.849  | 4.495  | 4.262  | 4.539  | 2.317  | 2.669  | 268697 | CCNB1     | NM_172301_13_-1 |
| Cpsf7         | 3.491  | 3.804  | 4.305  | 4.221  | 4.348  | 4.203  | 4.005  | 4.223  | 3.448  | 3.217  | 269061 | CPSF7     | NM_172302_19_+1 |
| Jade1         | 4.274  | 4.293  | 1.892  | 2.512  | 3.550  | 3.471  | 3.477  | 2.416  | 2.028  | 2.432  | 269424 | JADE1     | NM_172303_3_+1  |
| Tex10         | 4.884  | 4.917  | 5.162  | 5.005  | 5.063  | 5.003  | 5.105  | 5.232  | 5.341  | 5.235  | 269536 | TEX10     | NM_172304_4_-1  |
| Mbtps2        | 3.871  | 3.596  | 3.006  | 2.819  | 2.456  | 2.537  | 2.709  | 2.278  | 2.486  | 2.714  | 270669 | MBTPS2    | NM_172307_X_-1  |
| Mthfd1l       | 1.684  | 4.031  | 1.534  | 2.440  | 2.718  | 2.376  | 2.351  | 2.844  | 3.576  | 2.673  | 270685 | MTHFD1L   | NM_172308_10_+1 |
| Arntl2        | -4.131 | -4.282 | -4.972 | -4.972 | -4.771 | -4.900 | -4.937 | -4.881 | -4.173 | -4.822 | 272322 | ARNTL2    | NM_172309_6_+1  |
| Tarsl2        | 0.131  | -0.146 | 2.720  | 2.845  | 2.072  | 1.848  | 1.553  | 2.043  | 2.096  | 2.186  | 272396 | TARSL2    | NM_172310_7_+1  |
| Dnajc16       | 2.411  | 2.623  | 3.192  | 4.214  | 3.438  | 4.590  | 3.177  | 4.316  | 3.219  | 4.399  | 214063 | DNAJC16   | NM_172338_4_-1  |
| Snapc4        | 2.610  | 2.085  | 2.580  | 2.555  | 3.079  | 3.201  | 2.897  | 2.863  | 3.304  | 3.124  | 227644 | SNAPC4    | NM_172339_2_-1  |
| Slc16a13      | 3.460  | 3.593  | 3.082  | 2.992  | 2.880  | 3.102  | 2.957  | 3.061  | 2.952  | 2.846  | 69309  | SLC16A13  | NM_172371_11_-1 |
| Wdr45         | 1.527  | 2.585  | 2.233  | 1.621  | 0.198  | 0.915  | 1.514  | 1.537  | 2.247  | 2.191  | 54636  | WDR45     | NM_172372_X_+1  |
| Fam149b       | 2.954  | 1.108  | 0.133  | -0.331 | 0.881  | -2.714 | -2.126 | -1.034 | 1.062  | -0.825 | 105428 | FAM149B1  | NM_172379_14_+1 |
| Poglut1       | 4.155  | 4.554  | 6.035  | 6.304  | 4.321  | 4.138  | 4.487  | 4.713  | 4.187  | 4.650  | 224143 | POGLUT1   | NM_172380_16_-1 |
| AI314180      | 4.543  | 4.636  | 5.308  | 5.152  | 4.907  | 4.811  | 4.587  | 4.959  | 5.413  | 5.311  | 230249 | KIAA0368  | NM_172381_4_-1  |
| Kdm4a         | 1.437  | 1.786  | 2.514  | 3.150  | 2.948  | 3.388  | -0.672 | 0.021  | 0.627  | -2.593 | 230674 | KDM4A     | NM_172382_4_-1  |
| Zfp536        | -2.647 | -4.981 | -2.450 | -2.901 | -1.965 | -2.343 | -2.830 | -2.754 | -1.650 | -3.510 | 243937 | ZNF536    | NM_172385_7_-1  |
| Ahsa2         | 5.555  | 5.775  | 4.503  | 4.644  | 5.009  | 4.903  | 4.910  | 4.873  | 4.651  | 4.889  | 268390 | NA        | NM_172391_11_-1 |
| Zfp759        | 1.949  | 0.928  | 1.591  | 1.365  | 1.715  | 1.512  | 1.194  | 1.339  | 1.480  | 1.930  | 268670 | NA        | NM_172392_13_+1 |
| Aim1          | 1.107  | 0.784  | 6.202  | 6.118  | 5.846  | 5.654  | 5.635  | 6.056  | 6.573  | 6.878  | 11630  | AIM1      | NM_172393_10_-1 |
| Nup88         | 5.359  | 5.518  | 6.194  | 6.111  | 5.907  | 5.626  | 5.585  | 5.399  | 5.436  | 5.526  | 19069  | NUP88     | NM_172394_11_-1 |
| Cdc42se1      | 5.889  | 6.139  | 5.792  | 6.092  | 5.665  | 5.820  | 5.655  | 5.852  | 6.133  | 6.206  | 57912  | CDC42SE1  | NM_172395_3_+1  |
| Smim7         | 6.924  | 6.920  | 6.317  | 6.278  | 6.198  | 6.261  | 6.426  | 6.514  | 6.665  | 6.558  | 66818  | SMIM7     | NM_172396_8_-1  |
| Limd2         | 7.540  | 6.685  | 8.636  | 8.773  | 10.721 | 10.617 | 9.979  | 9.725  | 9.127  | 8.732  | 67803  | LIMD2     | NM_172397_11_-1 |
| Akr1b10       | 3.173  | 3.586  | 4.827  | 4.938  | 3.487  | 3.671  | 3.930  | 3.902  | 3.429  | 3.431  | 67861  | NA        | NM_172398_6_+1  |
| Ndnf          | -2.573 | -4.981 | -2.234 | -2.000 | -0.524 | -0.917 | 0.731  | 0.330  | 1.787  | 0.828  | 68169  | NDNF      | NM_172399_6_+1  |
| Dnajc8        | 8.021  | 7.928  | 8.554  | 8.597  | 8.227  | 8.280  | 8.159  | 7.924  | 7.204  | 6.891  | 68598  | DNAJC8    | NM_172400_4_+1  |
| Ldah          | 5.152  | 5.450  | 5.110  | 5.224  | 4.908  | 4.870  | 4.932  | 5.048  | 5.218  | 5.322  | 68832  | LDAH      | NM_172401_12_+1 |
| Slc25a32      | 2.794  | 3.512  | 3.699  | 3.613  | 3.693  | 3.352  | 3.749  | 3.475  | 4.116  | 4.204  | 69906  | SLC25A32  | NM_172402_15_-1 |
| 2810021J22Rik | 1.889  | 2.868  | 1.811  | 2.040  | 2.548  | 2.673  | 2.017  | 2.464  | 2.608  | 2.317  | 69944  | NA        | NM_172403_11_+1 |
| Kyat1         | 2.120  | 2.376  | 1.273  | 1.361  | 1.371  | 1.457  | 1.296  | 1.820  | 1.453  | 1.285  | 70266  | KYAT1     | NM_172404_2_-1  |
| Fam175a       | 4.577  | 4.540  | 3.020  | 3.147  | 3.713  | 3.447  | 3.395  | 3.372  | 2.661  | 2.369  | 70681  | FAM175A   | NM_172405_5_-1  |
| Trak2         | 4.224  | 4.662  | 4.619  | 4.394  | 4.206  | 4.536  | 4.358  | 4.739  | 4.807  | 4.959  | 70827  | TRAK2     | NM_172406_1_-1  |
| Cdkn2aip      | 4.188  | 4.228  | 3.896  | 3.782  | 3.758  | 4.101  | 4.024  | 4.388  | 4.630  | 4.698  | 70925  | CDKN2AIP  | NM_172407_8_-1  |
| Fmnl2         | 6.177  | 6.417  | 6.737  | 6.553  | 2.944  | 2.964  | 3.337  | 3.559  | -0.664 | -0.114 | 71409  | FMNL2     | NM_172409_2_+1  |
| Nup93         | 4.446  | 4.672  | 5.834  | 5.995  | 4.731  | 4.865  | 4.525  | 4.708  | 4.042  | 4.448  | 71805  | NUP93     | NM_172410_8_+1  |
| Gpc2          | -0.080 | -0.034 | -0.003 | -0.378 | 1.496  | 1.632  | 0.902  | 0.219  | 1.287  | 1.084  | 71951  | GPC2      | NM_172412_5_-1  |
| Rap2c         | 4.910  | 5.009  | 5.035  | 4.857  | 4.455  | 4.436  | 4.982  | 4.870  | 5.759  | 6.156  | 72065  | RAP2C     | NM_172413_X_-1  |
| Zc2hc1c       | -1.642 | -0.676 | -0.905 | -1.409 | -2.281 | -3.333 | -1.242 | -3.314 | 0.325  | -2.102 | 72350  | ZC2HC1C   | NM_172414_12_+1 |
| Arhgef10l     | -2.421 | -1.626 | -3.934 | -4.253 | -4.405 | -4.781 | -2.343 | -2.921 | -0.063 | -0.190 | 72754  | ARHGEF10L | NM_172415_4_-1  |
| Ostm1         | 6.871  | 7.273  | 5.633  | 5.615  | 5.664  | 5.759  | 6.011  | 6.086  | 7.244  | 7.386  | 14628  | OSTM1     | NM_172416_10_+1 |
| Perm1         | -1.542 | -0.554 | 1.784  | 1.675  | -0.613 | 0.578  | -0.541 | -0.032 | -0.323 | -0.235 | 74183  | NA        | NM_172417_4_+1  |
| Mamstr        | -2.123 | -2.681 | -1.660 | -0.939 | -0.250 | 0.074  | -2.225 | -3.862 | -3.373 | -3.853 | 74490  | MAMSTR    | NM_172418_7_+1  |
| Ppp1r1c       | -4.981 | -4.981 | -3.738 | -4.944 | -4.975 | -4.975 | -4.981 | -4.981 | -4.981 | -4.981 | 75276  | PPP1R1C   | NM_172420_2_+1  |
| Asxl2         | 1.956  | 3.115  | 4.173  | 3.692  | 2.651  | 2.897  | 3.225  | 2.781  | 3.689  | 3.858  | 75302  | ASXL2     | NM_172421_12_+1 |
| Fastkd2       | 4.354  | 3.796  | 4.232  | 4.348  | 4.263  | 4.020  | 3.840  | 4.131  | 3.586  | 3.160  | 75619  | FASTKD2   | NM_172422_1_+1  |
| Med13l        | 4.931  | 4.905  | 4.866  | 4.793  | 5.310  | 5.293  | 5.585  | 5.018  | 4.993  | 5.212  | 76199  | MED13L    | NM_172424_5_+1  |
| Ccdc134       | 5.196  | 5.257  | 4.304  | 4.402  | 4.609  | 4.273  | 4.228  | 4.457  | 3.922  | 3.958  | 76457  | CCDC134   | NM_172428_15_+1 |
| Smndc1        | 5.779  | 5.389  | 5.760  | 5.320  | 5.928  | 5.480  | 5.672  | 4.922  | 5.100  | 4.454  | 76479  | SMNDC1    | NM_172429_19_-1 |
| Celf3         | -4.981 | -4.981 | -4.950 | -4.950 | -4.981 | -4.981 | -4.981 | -4.981 | -4.981 | -4.981 | 78784  | CELF3     | NM_172434_3_+1  |
| P2ry10        | 7.135  | 7.082  | 6.144  | 5.619  | 6.361  | 6.240  | 5.403  | 5.169  | -0.145 | 0.107  | 78826  | P2RY10    | NM_172435_X_+1  |
| Slc25a12      | 7.030  | 7.799  | 5.658  | 5.479  | 5.073  | 5.314  | 4.972  | 5.476  | 6.154  | 5.927  | 78830  | SLC25A12  | NM_172436_2_-1  |

|               |          |        |        |        |        |        |        |        |        |        |        |        |          |                 |
|---------------|----------|--------|--------|--------|--------|--------|--------|--------|--------|--------|--------|--------|----------|-----------------|
|               | Pus7l    | 2.209  | 2.579  | 2.613  | 2.720  | 2.419  | 2.508  | 2.364  | 2.231  | 2.737  | 2.716  | 78895  | PUS7L    | NM_172437_15_-1 |
|               | Thoc5    | 4.635  | 4.589  | 4.986  | 5.205  | 4.862  | 5.000  | 4.545  | 4.761  | 4.649  | 4.651  | 107829 | THOC5    | NM_172438_11_+1 |
|               | Inpp5j   | -4.981 | -4.981 | 0.173  | 0.684  | -0.358 | 0.298  | -0.259 | -0.861 | 2.562  | 0.952  | 170835 | INPP5J   | NM_172439_11_-1 |
|               | Dtx4     | 3.341  | 4.189  | 3.630  | 3.860  | 1.276  | -0.197 | 2.183  | 2.924  | 3.064  | 4.118  | 207521 | DTX4     | NM_172442_19_-1 |
|               | Tbc1d16  | 2.552  | 2.278  | 0.877  | 1.220  | 4.054  | 4.978  | 3.033  | 2.412  | 0.592  | 0.419  | 207592 | TBC1D16  | NM_172443_11_-1 |
|               | Thsd4    | -4.981 | -4.981 | -4.981 | -4.981 | -4.460 | -4.792 | -4.981 | -4.981 | -4.981 | -4.981 | 207596 | THSD4    | NM_172444_9_-1  |
|               | Wdr37    | 4.284  | 4.073  | 4.450  | 4.335  | 4.147  | 4.240  | 4.560  | 4.570  | 4.679  | 5.301  | 207615 | WDR37    | NM_172445_13_-1 |
|               | Rnf43    | -2.454 | -3.408 | -0.430 | -1.528 | 3.230  | 2.203  | 2.121  | 0.279  | -0.436 | -4.227 | 207742 | RNF43    | NM_172448_11_+1 |
|               | Bzap1    | -1.271 | -4.981 | 4.026  | 2.832  | 3.077  | 1.154  | 1.932  | -0.941 | 0.343  | -0.699 | 207777 | TSPOAP1  | NM_172449_11_+1 |
| 4930539E08Rik |          | -1.217 | -1.972 | -3.688 | -2.694 | -4.438 | -3.343 | -4.852 | -2.817 | -3.204 | -2.795 | 207819 | C6orf222 | NM_172450_17_-1 |
|               | Galtnt6  | 0.352  | -0.007 | -0.418 | -0.123 | 1.822  | 1.283  | 2.979  | 1.833  | 2.319  | 2.028  | 207839 | GALNT6   | NM_172451_15_-1 |
|               | Pif1     | -4.981 | -0.543 | 0.202  | 0.524  | 0.966  | 0.351  | 1.239  | 0.392  | -0.379 | -1.466 | 208084 | PIF1     | NM_172453_9_+1  |
|               | Exog     | 2.681  | 3.126  | 2.719  | 2.440  | 2.352  | 2.655  | 2.800  | 2.614  | 2.277  | 2.371  | 208194 | EXOG     | NM_172456_9_+1  |
|               | Mob3a    | 7.239  | 6.983  | 8.031  | 8.132  | 8.429  | 8.331  | 7.806  | 7.662  | 8.369  | 8.175  | 208228 | MOB3A    | NM_172457_10_-1 |
|               | Zfp871   | 5.066  | 4.813  | 5.654  | 4.757  | 6.125  | 5.490  | 5.877  | 4.869  | 5.771  | 5.472  | 208292 | NA       | NM_172458_17_-1 |
|               | Nphp3    | 1.797  | 1.351  | 0.860  | 0.286  | -0.023 | -0.319 | -0.429 | -0.048 | 0.054  | -0.960 | 74025  | NPHP3    | NM_172460_9_+1  |
|               | Zfp11    | -0.075 | 0.232  | 0.834  | 0.591  | 1.294  | 1.198  | 0.954  | -0.172 | 1.275  | 2.239  | 22648  | ZNF546   | NM_172462_5_-1  |
|               | Sned1    | -0.212 | -1.790 | 1.431  | 0.368  | -1.623 | -2.547 | -2.860 | -2.444 | -0.716 | -4.981 | 208777 | SNED1    | NM_172463_1_+1  |
|               | Daam1    | 1.594  | 0.614  | 1.388  | 0.862  | 1.353  | 0.398  | 0.790  | 0.421  | 0.358  | -0.252 | 208846 | DAAM1    | NM_172464_12_+1 |
|               | Zdhhc9   | 4.556  | 4.732  | 5.464  | 5.082  | 4.109  | 4.133  | 4.859  | 5.403  | 6.665  | 6.901  | 208884 | ZDHHC9   | NM_172465_X_-1  |
|               | Zc3hav1l | 0.094  | 0.756  | -1.366 | -0.810 | -1.034 | -0.920 | -1.515 | -2.073 | -1.009 | -2.037 | 209032 | ZC3HAV1L | NM_172467_6_-1  |
|               | Snx30    | 5.838  | 5.269  | 4.534  | 4.586  | 5.449  | 5.627  | 5.435  | 5.162  | 5.628  | 5.385  | 209131 | SNX30    | NM_172468_4_+1  |
|               | Clic6    | -4.981 | -4.981 | -4.937 | -4.726 | -4.362 | -4.815 | -4.961 | -4.971 | -4.981 | -4.981 | 209195 | CLIC6    | NM_172469_16_+1 |
|               | Wdr35    | -1.726 | -0.710 | -3.364 | -3.977 | -4.179 | -3.035 | -2.888 | -2.673 | -2.671 | -3.255 | 74682  | WDR35    | NM_172470_12_+1 |
|               | Itih5    | -0.566 | -4.981 | -3.031 | -4.914 | -2.519 | -1.313 | -2.020 | 0.703  | -0.302 | -1.658 | 209378 | ITIH5    | NM_172471_2_+1  |
|               | Tfe3     | 2.234  | 2.353  | 3.520  | 3.570  | 3.758  | 3.628  | 3.196  | 3.742  | 5.090  | 4.833  | 209446 | TFE3     | NM_172472_X_+1  |
|               | Hace1    | 2.066  | 2.717  | 3.046  | 2.928  | 3.060  | 3.305  | 3.115  | 3.295  | 3.693  | 4.010  | 209462 | HACE1    | NM_172473_10_+1 |
|               | Tyw3     | 2.972  | 2.628  | 3.309  | 3.118  | 2.947  | 2.647  | 2.356  | 2.450  | 1.810  | 2.246  | 209584 | TYW3     | NM_172474_3_-1  |
|               | Frmd4a   | 3.805  | 3.138  | 1.715  | 2.369  | 1.305  | 1.480  | 1.137  | 0.578  | -2.491 | -4.716 | 209630 | FRMD4A   | NM_172475_2_+1  |
|               | Dennd2a  | -1.627 | -2.136 | -0.212 | 1.051  | -2.561 | -0.845 | -2.815 | -0.317 | 3.129  | 3.368  | 209773 | DENND2A  | NM_172477_6_-1  |
|               | Tbc1d25  | 1.919  | 2.180  | 1.537  | 1.169  | 2.240  | 2.551  | 1.694  | 1.051  | 1.658  | 2.109  | 209815 | TBC1D25  | NM_172478_X_-1  |
|               | Slc38a5  | -4.981 | -0.891 | -4.074 | 2.571  | -0.830 | 2.765  | 0.486  | 3.263  | -0.764 | 0.654  | 209837 | SLC38A5  | NM_172479_X_+1  |
|               | Mtrr     | 2.882  | 3.083  | 1.956  | 2.779  | 2.930  | 3.275  | 2.014  | 3.034  | 2.506  | 2.863  | 210009 | MTRR     | NM_172480_13_-1 |
|               | Zfp719   | 3.000  | 3.688  | 1.565  | 1.889  | 2.774  | 2.886  | 2.181  | 2.436  | 2.971  | 3.506  | 210105 | NA       | NM_172482_7_+1  |
|               | Zfp180   | 1.939  | 0.369  | -1.728 | -1.661 | -0.656 | -0.757 | -1.105 | -1.005 | -3.623 | -4.317 | 210135 | ZNF180   | NM_172483_7_+1  |
|               | Nckap5   | -4.981 | -4.981 | -4.166 | -4.945 | -4.981 | -4.981 | -4.313 | -4.738 | -4.981 | -4.981 | 210356 | NCKAP5   | NM_172484_1_-1  |
|               | Zfp677   | 3.810  | 3.782  | 2.511  | 3.061  | 2.945  | 3.386  | 2.863  | 3.192  | 2.920  | 3.896  | 210503 | NA       | NM_172486_17_+1 |
|               | Prrt3    | -0.983 | -0.040 | -3.233 | -4.001 | -3.858 | -4.260 | -3.492 | -4.341 | -3.747 | -3.863 | 210673 | PRRT3    | NM_172487_6_-1  |
|               | Lacc1    | 5.450  | 5.589  | 7.025  | 7.228  | 5.290  | 5.808  | 5.822  | 6.266  | 4.785  | 5.222  | 210808 | LACC1    | NM_172488_14_-1 |
|               | Sepsecs  | 1.991  | 2.427  | 4.230  | 3.038  | 2.311  | 2.348  | 2.664  | 2.258  | 2.554  | 2.705  | 211006 | SEPSECS  | NM_172490_5_-1  |
| D130040H23Rik |          | 1.993  | 1.363  | 2.159  | 2.409  | 2.964  | 2.953  | 1.931  | 1.576  | -0.083 | 0.617  | 211135 | NA       | NM_172491_8_+1  |
|               | Lrtm2    | -4.057 | -4.461 | -4.949 | -4.976 | -3.421 | -3.526 | -4.833 | -4.983 | -4.691 | -4.981 | 211187 | LRTM2    | NM_172492_6_-1  |
|               | Diaph2   | 3.616  | 3.729  | 4.749  | 4.550  | 4.783  | 4.612  | 5.103  | 4.833  | 6.043  | 6.328  | 54004  | NA       | NM_172493_X_+1  |
|               | Ncoa7    | 1.554  | 2.595  | 4.136  | 3.923  | 2.539  | 2.693  | 2.809  | 2.672  | 3.536  | 3.437  | 211329 | NCOA7    | NM_172495_10_-1 |
|               | Efhb     | -2.573 | -4.981 | -4.978 | -4.157 | -4.778 | -4.908 | -4.426 | -2.755 | -1.474 | -2.750 | 211482 | EFHB     | NM_172497_17_-1 |
|               | Ptk2b    | 6.131  | 6.568  | 5.680  | 6.153  | 6.811  | 7.426  | 7.308  | 7.839  | 8.264  | 8.416  | 19229  | PTK2B    | NM_172498_14_-1 |
|               | Mfsd9    | 0.812  | 0.464  | -0.020 | 0.617  | -0.026 | 1.201  | 1.011  | 0.952  | 2.688  | 2.541  | 211798 | MFSD9    | NM_172499_1_-1  |
|               | Syne3    | -4.618 | -2.137 | -3.874 | -2.951 | -1.959 | -3.487 | -0.733 | -2.096 | -1.216 | -3.505 | 212073 | SYNE3    | NM_172500_12_-1 |
|               | Nhlrc3   | 2.483  | 2.295  | 2.621  | 2.589  | 1.976  | 2.155  | 2.423  | 3.048  | 3.544  | 3.309  | 212114 | NHLRC3   | NM_172501_3_-1  |
|               | Dcaf15   | 3.837  | 3.897  | 3.085  | 3.492  | 3.781  | 3.908  | 3.543  | 3.690  | 3.556  | 3.703  | 212123 | DCAF15   | NM_172502_8_-1  |
|               | Zswim4   | 4.248  | 4.544  | 2.902  | 3.226  | 3.262  | 3.431  | 3.248  | 3.348  | 4.830  | 4.314  | 212168 | ZSWIM4   | NM_172503_8_-1  |
| A730008H23Rik |          | -2.764 | -0.567 | -0.009 | 0.330  | 0.866  | -0.210 | 0.253  | -0.303 | 2.822  | 1.735  | 212427 | NA       | NM_172505_1_-1  |
|               | Boc      | -4.981 | -4.981 | -4.251 | -4.953 | -3.068 | -4.052 | -3.210 | -2.946 | -4.981 | -0.031 | 117606 | BOC      | NM_172506_16_-1 |
|               | Sh3bgrl2 | 0.228  | -1.520 | -0.288 | -1.454 | 0.237  | -1.499 | 0.601  | -0.582 | 0.760  | 1.305  | 212531 | SH3BGRL2 | NM_172507_9_+1  |
|               | Dse      | 4.662  | 4.508  | 4.968  | 4.542  | 3.759  | 2.689  | 4.690  | 5.555  | 6.465  | 7.071  | 212898 | DSE      | NM_172508_10_-1 |
|               | Kctd7    | -0.499 | -0.773 | 1.941  | 2.186  | 1.231  | 1.332  | 0.154  | 1.387  | 2.684  | 2.602  | 212919 | KCTD7    | NM_172509_5_+1  |
|               | Mfsd4a   | -2.165 | -2.442 | 0.048  | -0.073 | 0.298  | -0.622 | -0.027 | 0.222  | 1.431  | 2.123  | 213006 | MFSD4A   | NM_172510_1_-1  |
|               | Abhd10   | 4.517  | 4.050  | 3.477  | 3.383  | 3.641  | 3.330  | 3.906  | 3.283  | 2.493  | 3.292  | 213012 | ABHD10   | NM_172511_16_-1 |
|               | Gabpb2   | 3.228  | 3.701  | 3.497  | 2.906  | 4.007  | 3.253  | 3.823  | 2.901  | 4.432  | 3.557  | 213054 | GABPB2   | NM_172512_3_-1  |
|               | Fam126b  | 3.469  | 3.720  | 3.455  | 3.158  | 3.825  | 3.447  | 4.097  | 3.517  | 3.817  | 4.251  | 213056 | FAM126B  | NM_172513_1_-1  |
|               | Tmem71   | 3.953  | 4.030  | 1.960  | 1.254  | 2.848  | 2.816  | 4.535  | 4.417  | 6.828  | 6.619  | 213068 | TMEM71   | NM_172514_15_-1 |
|               | Dstyky   | 2.682  | 1.843  | 3.368  | 2.901  | 4.344  | 4.326  | 4.965  | 3.930  | 5.910  | 5.588  | 213452 | DSTYK    | NM_172516_1_+1  |
|               | Rbbp5    | 4.301  | 4.509  | 4.876  | 4.908  | 5.013  | 5.116  | 4.895  | 4.841  | 5.377  | 5.335  | 213464 | RBBP5    | NM_172517_1_+1  |
|               | Fbxo42   | 4.976  | 5.255  | 4.655  | 4.686  | 5.240  | 5.184  | 5.080  | 4.611  | 5.373  | 4.991  | 213499 | FBXO42   | NM_172518_4_+1  |
|               | Dis3l    | 1.022  | 1.606  | -0.739 | -0.903 | -2.599 | -1.865 | 0.240  | -1.924 | 0.408  | 1.631  | 213550 | DIS3L    | NM_172519_9_-1  |
|               | Nutm1    | -4.981 | -4.981 | -4.777 | -4.352 | -4.853 | -4.977 | -4.968 | -4.980 | -4.981 | -4.981 | 213765 | NUTM1    | NM_172521_2_-1  |
|               | Megf11   | -2.151 | -3.267 | -2.104 | -3.325 | -3.225 | -3.935 | -3.051 | -3.501 | -4.394 | -4.381 | 214058 | MEGF11   | NM_172522_9_+1  |
|               | Slc18a2  | 2.292  | 1.192  | 0.802  | 1.161  | 0.880  | 0.896  | 2.876  | 1.237  | 2.137  | 2.491  | 214084 | SLC18A2  | NM_172523_19_+1 |
|               | Arhgap29 | 2.486  | 3.559  | -1.633 | -0.502 | -1.045 | -0.900 | 0.136  | -1.173 | 1.752  | 1.415  | 214137 | ARHGAP29 | NM_172525_3_+1  |
|               | Nudt15   | 1.788  | 2.192  | 3.634  | 4.323  | 2.739  | 2.929  | 2.642  | 2.796  | 2.325  | 2.639  | 214254 | NUDT15   | NM_172527_14_-1 |
|               | Lrrc1    | 1.539  | 1.584  | 1.172  | 0.419  | -0.888 | 0.558  | -3.407 | -1.109 | -1.771 | -0.434 | 214345 | LRRC1    | NM_172528_9_-1  |
|               | Gnptg    | 6.147  | 6.049  | 4.579  | 4.551  | 4.857  | 4.673  | 4.556  | 4.661  | 4.481  | 4.235  | 214505 | GNPTG    | NM_172529_17_-1 |
|               | She      | -1.340 | -1.244 | -2.615 | -2.491 | -1.662 | -1.370 | -0.891 | -2.012 | 1.027  | -0.700 | 214547 | SHE      | NM_172530_3_+1  |
|               | Aldh5a1  | -0.246 | 0.847  | -0.431 | 0.838  | -1.248 | 1.183  | -1.907 | 0.969  | -0.178 | 1.006  | 214579 | ALDH5A1  | NM_172532_13_-1 |

|               |        |        |        |        |        |        |        |        |        |        |           |          |                 |
|---------------|--------|--------|--------|--------|--------|--------|--------|--------|--------|--------|-----------|----------|-----------------|
| Zfp609        | 1.635  | 1.432  | 2.015  | 1.847  | 2.605  | 2.311  | 2.378  | 1.964  | 2.738  | 2.522  | 214812    | ZNF609   | NM_172536_9_-1  |
| Sema6d        | -0.534 | -4.773 | -0.549 | -0.164 | -1.252 | -2.446 | -2.168 | -0.852 | -4.361 | -4.820 | 214968    | SEMA6D   | NM_172537_2_+1  |
| Vezt          | 1.050  | -0.120 | 0.822  | -0.147 | 0.856  | 0.601  | 0.543  | 0.734  | 0.121  | 0.457  | 215008    | VEZT     | NM_172538_10_-1 |
| Astl          | -4.981 | -4.981 | -4.737 | -3.010 | -4.308 | -4.583 | -4.978 | -4.960 | -4.394 | -3.882 | 215095    | ASTL     | NM_172539_2_+1  |
| Trmt2b        | 4.752  | 4.832  | 4.242  | 4.020  | 4.177  | 4.271  | 3.978  | 3.794  | 3.920  | 3.669  | 215201    | TRMT2B   | NM_172540_X_-1  |
| Tmem120a      | 4.793  | 4.920  | 4.407  | 5.024  | 4.310  | 4.553  | 4.319  | 4.564  | 4.284  | 4.391  | 215210    | TMEM120A | NM_172541_5_-1  |
| Fam117a       | 6.208  | 5.986  | 4.349  | 4.377  | 3.806  | 3.980  | 4.432  | 4.587  | 4.835  | 4.657  | 215512    | FAM117A  | NM_172543_11_+1 |
| Ehmt1         | 2.343  | -0.395 | 2.885  | 3.868  | 2.541  | 2.927  | 2.598  | 3.530  | 4.828  | 5.021  | 77683     | EHMT1    | NM_172545_2_-1  |
| Cnksr3        | 0.862  | 2.054  | 1.133  | 1.563  | 0.926  | 1.216  | 2.058  | 2.597  | 3.639  | 3.665  | 215748    | CNKSR3   | NM_172546_10_-1 |
| Cabin1        | 4.694  | 4.210  | 5.413  | 5.179  | 6.055  | 5.830  | 5.773  | 5.855  | 6.835  | 6.812  | 104248    | CABIN1   | NM_172549_10_-1 |
| Ybey          | 1.495  | 1.924  | 2.039  | 2.185  | 2.129  | 2.066  | 1.770  | 1.455  | 2.184  | 1.798  | 216119    | YBEY     | NM_172550_10_-1 |
| Polrmt        | 2.955  | 3.138  | 3.065  | 3.024  | 3.687  | 3.286  | 3.610  | 3.200  | 4.088  | 3.840  | 216151    | POLRMT   | NM_172551_10_-1 |
| Tdg           | 3.381  | 2.860  | 3.722  | 3.549  | 3.450  | 3.076  | 3.262  | 3.009  | 3.899  | 3.693  | 21665     | TDG      | NM_172552_10_+1 |
| Zdhhc17       | 4.226  | 4.191  | 4.026  | 3.976  | 4.351  | 4.202  | 3.984  | 3.965  | 4.035  | 4.368  | 320150    | ZDHHC17  | NM_172554_10_-1 |
| Papolg        | 3.632  | 3.858  | 4.208  | 4.118  | 5.086  | 4.872  | 4.893  | 4.341  | 4.730  | 5.121  | 216578    | PAPOLG   | NM_172555_11_-1 |
| Rufy1         | 6.084  | 6.233  | 5.414  | 5.442  | 5.517  | 5.460  | 5.477  | 5.560  | 5.456  | 5.647  | 216724    | RUFY1    | NM_172557_11_-1 |
| Gemin5        | 2.002  | 2.775  | 2.111  | 1.626  | 1.738  | 1.288  | 1.478  | 1.582  | 0.709  | 1.690  | 216766    | GEMIN5   | NM_172558_11_-1 |
| Cntrob        | 2.878  | 2.864  | 2.812  | 2.852  | 3.207  | 3.459  | 2.613  | 2.454  | 2.074  | 1.857  | 216846    | CNTR0B   | NM_172560_11_-1 |
| Spag7         | 7.080  | 7.214  | 6.584  | 6.551  | 6.652  | 6.564  | 6.423  | 6.388  | 5.442  | 5.324  | 216873    | SPAG7    | NM_172561_11_-1 |
| Tada2a        | 2.812  | 3.444  | 2.366  | 2.840  | 2.885  | 3.122  | 2.598  | 2.735  | 2.068  | 2.247  | 217031    | TADA2A   | NM_172562_11_-1 |
| Hlf           | -4.981 | -1.212 | -4.747 | -4.133 | -4.938 | -4.876 | -4.692 | -4.868 | -1.084 | -4.981 | 217082    | HLF      | NM_172563_11_-1 |
| Tns4          | -0.728 | -4.981 | 0.273  | 1.319  | 0.043  | -1.345 | 3.248  | 3.963  | 5.129  | 5.140  | 217169    | TNS4     | NM_172564_11_-1 |
| Klhl11        | 0.927  | 1.020  | 1.126  | 0.885  | 1.688  | 1.016  | 0.851  | 0.586  | 1.237  | 1.797  | 217194    | KLHL11   | NM_172565_11_-1 |
| Rundc1        | 3.649  | 4.106  | 4.338  | 4.270  | 3.790  | 3.721  | 3.846  | 3.779  | 4.058  | 3.974  | 217201    | RUNDC1   | NM_172566_11_+1 |
| Mettl2        | 3.684  | 3.686  | 4.018  | 4.160  | 4.019  | 4.132  | 3.960  | 3.961  | 3.457  | 3.467  | 52686     | METTL2A  | NM_172567_11_+1 |
| Unk           | 4.007  | 3.953  | 2.399  | 3.651  | 3.645  | 3.378  | 3.258  | 2.859  | 3.702  | 3.906  | 217331    | UNK      | NM_172569_11_+1 |
| Trim47        | -1.205 | -2.912 | -0.890 | -1.773 | -0.918 | -1.914 | -0.091 | 0.260  | 0.425  | 0.979  | 217333    | TRIM47   | NM_172570_11_-1 |
| Fbf1          | 1.991  | 2.186  | 2.892  | 3.061  | 2.569  | 2.805  | 3.055  | 2.549  | 2.883  | 2.906  | 217335    | FBF1     | NM_172571_11_-1 |
| Rhbdf2        | 0.438  | 0.614  | -2.365 | -4.705 | -4.728 | -4.878 | -4.212 | -2.837 | -1.399 | -0.698 | 217344    | RHBDF2   | NM_172572_11_-1 |
| Engase        | 2.047  | 1.719  | 3.168  | 3.121  | 1.865  | 1.520  | 2.698  | 2.857  | 3.308  | 3.169  | 217364    | ENGASE   | NM_172573_11_+1 |
| Pqlc3         | 8.284  | 8.145  | 6.050  | 5.483  | 6.113  | 5.805  | 6.308  | 5.725  | 7.477  | 6.554  | 217430    | PQLC3    | NM_172574_12_-1 |
| Zfp277        | 0.908  | 1.809  | 0.612  | 1.421  | 2.204  | 1.710  | 0.883  | 1.027  | 1.048  | 2.062  | 246196    | ZNF277   | NM_172575_12_-1 |
| Slc25a21      | -4.981 | -1.185 | -3.950 | 0.377  | -2.114 | 0.398  | -2.981 | 0.684  | -4.978 | -1.341 | 217593    | SLC25A21 | NM_172577_12_-1 |
| Mis18bp1      | -0.336 | 0.328  | 3.051  | 2.940  | 3.872  | 3.255  | 3.605  | 3.039  | 1.261  | 1.693  | 217653    | MIS18BP1 | NM_172578_12_-1 |
| Sipa111       | 3.008  | 3.058  | 4.316  | 4.005  | 4.273  | 4.059  | 3.177  | 3.568  | 3.035  | 2.683  | 217692    | SIP111   | NM_172579_12_+1 |
| Acot6         | -1.902 | -1.415 | -0.278 | -0.685 | -1.858 | -1.844 | -3.343 | -1.938 | -4.981 | -4.981 | 217700    | NA       | NM_172580_12_+1 |
| Fam161b       | -0.276 | -0.045 | -1.195 | -1.360 | -0.549 | -1.845 | -2.435 | -3.123 | -1.715 | -1.251 | 217705    | FAM161B  | NM_172581_12_-1 |
| Coq6          | 4.587  | 4.705  | 3.733  | 3.989  | 3.699  | 3.753  | 3.555  | 3.753  | 3.306  | 3.081  | 217707    | COQ6     | NM_172582_12_+1 |
| Itpk1         | 3.915  | 4.439  | 4.532  | 4.761  | 4.507  | 4.615  | 4.835  | 4.930  | 5.315  | 5.047  | 217837    | ITPK1    | NM_172584_12_-1 |
| Larp4b        | 4.785  | 4.962  | 6.071  | 5.902  | 5.902  | 5.787  | 5.816  | 5.699  | 6.295  | 6.521  | 217980    | LARP4B   | NM_172585_13_+1 |
| Zfp322a       | 2.562  | 3.796  | 3.482  | 3.971  | 2.770  | 3.183  | 2.879  | 3.336  | 2.793  | 4.142  | 218100    | ZNF322   | NM_172586_13_-1 |
| Cdc14b        | -3.937 | 1.666  | 1.266  | 1.910  | 0.674  | 2.471  | -1.219 | 1.326  | 1.129  | 0.989  | 218294    | CDC14B   | NM_172587_13_-1 |
| Serinc5       | 6.286  | 6.325  | 2.803  | 3.315  | 3.617  | 3.713  | 3.487  | 4.120  | 5.333  | 5.552  | 218442    | SERINC5  | NM_172588_13_+1 |
| Lhfp12        | -2.013 | -2.060 | -1.794 | -1.978 | -3.588 | -2.926 | -4.469 | -1.516 | -0.901 | -1.933 | 218454    | LHFPL2   | NM_172589_13_+1 |
| Wdr41         | 3.463  | 3.745  | 5.356  | 5.542  | 5.347  | 5.672  | 4.945  | 5.473  | 5.735  | 5.969  | 218460    | WDR41    | NM_172590_13_+1 |
| Fcho2         | 4.819  | 4.992  | 5.451  | 5.385  | 5.865  | 5.998  | 6.508  | 6.286  | 7.346  | 7.583  | 218503    | FCHO2    | NM_172591_13_-1 |
| Srek1         | 5.240  | 5.297  | 5.917  | 5.731  | 5.457  | 5.463  | 5.263  | 5.243  | 4.781  | 4.920  | 218543    | SREK1    | NM_172592_13_-1 |
| Mier3         | 4.842  | 4.270  | 4.566  | 4.418  | 4.673  | 4.402  | 4.404  | 4.242  | 4.262  | 4.571  | 218613    | MIER3    | NM_172593_13_+1 |
| Dhx29         | 3.602  | 3.464  | 4.000  | 4.269  | 4.242  | 4.217  | 4.042  | 3.853  | 3.888  | 4.150  | 218629    | DHX29    | NM_172594_13_+1 |
| Arl15         | 2.053  | 2.058  | 2.398  | 2.161  | 1.819  | 2.072  | 2.385  | 2.549  | 3.839  | 3.879  | 218639    | ARL15    | NM_172595_13_+1 |
| Sec24c        | 6.074  | 5.896  | 6.539  | 6.469  | 6.409  | 6.312  | 6.362  | 6.464  | 7.449  | 7.406  | 218811    | SEC24C   | NM_172596_14_+1 |
| Txndc16       | 4.694  | 4.708  | 5.686  | 5.842  | 4.083  | 4.157  | 4.470  | 4.608  | 5.022  | 5.252  | 70561     | TXNDC16  | NM_172597_14_-1 |
| Wdhd1         | 1.619  | 1.181  | 3.382  | 3.257  | 3.902  | 3.286  | 3.521  | 3.335  | 2.878  | 2.102  | 218973    | WDHD1    | NM_172598_14_-1 |
| Atg14         | 3.980  | 3.662  | 3.667  | 3.665  | 4.377  | 3.887  | 4.308  | 3.865  | 4.148  | 4.302  | 100504663 | ATG14    | NM_172599_14_-1 |
| Tmem260       | 4.170  | 4.233  | 4.392  | 4.767  | 4.063  | 3.848  | 4.020  | 3.695  | 4.362  | 4.760  | 218989    | TMEM260  | NM_172600_14_+1 |
| Rab2b         | 4.167  | 4.576  | 3.587  | 3.942  | 3.672  | 4.084  | 3.460  | 3.694  | 3.225  | 3.551  | 76338     | RAB2B    | NM_172601_14_-1 |
| Phf11a        | 4.466  | 3.920  | 7.614  | 7.123  | 6.442  | 5.637  | 6.651  | 5.445  | 4.476  | 2.926  | 219131    | PHF11    | NM_172603_14_-1 |
| Scara3        | -4.981 | -4.981 | -4.490 | -4.942 | -4.451 | -4.900 | -4.966 | -2.731 | -4.981 | -4.981 | 219151    | SCARA3   | NM_172604_14_-1 |
| Tdrd3         | 3.647  | 4.264  | 3.567  | 3.882  | 3.101  | 3.699  | 3.058  | 3.695  | 3.597  | 4.241  | 219249    | TDRD3    | NM_172605_14_+1 |
| March6        | 4.874  | 4.811  | 4.578  | 4.514  | 5.151  | 5.219  | 4.946  | 4.853  | 4.644  | 4.585  | 223455    | MARCH6   | NM_172606_15_-1 |
| Naprt         | 0.002  | -0.250 | 2.463  | 3.461  | 2.111  | 2.415  | 2.719  | 3.102  | 1.832  | 3.101  | 223646    | NAPRT    | NM_172607_15_-1 |
| Tmem184b      | 4.730  | 4.194  | 4.969  | 4.837  | 5.189  | 5.807  | 4.637  | 4.822  | 6.723  | 6.368  | 223693    | TMEM184B | NM_172608_15_-1 |
| Tomm22        | 7.627  | 7.339  | 7.441  | 7.218  | 7.509  | 7.260  | 7.270  | 7.006  | 6.932  | 6.514  | 223696    | TOMM22   | NM_172609_15_+1 |
| Gramd4        | 3.817  | 3.095  | 3.774  | 3.515  | 3.872  | 3.448  | 4.739  | 4.296  | 6.616  | 5.867  | 223752    | GRAMD4   | NM_172611_15_+1 |
| Rnd1          | -0.689 | -0.534 | 2.978  | 3.293  | 2.501  | 2.852  | 1.771  | 2.148  | 1.382  | 2.062  | 223881    | RND1     | NM_172612_15_-1 |
| Atp13a4       | -4.981 | -4.981 | -4.981 | -4.981 | -4.981 | -4.981 | -3.659 | -4.955 | -4.981 | -0.438 | 224079    | ATP13A4  | NM_172613_16_-1 |
| Tmem44        | -3.090 | -1.644 | -4.742 | -3.758 | -1.827 | -1.876 | -2.938 | -1.875 | -3.043 | -4.981 | 224090    | TMEM44   | NM_172614_16_-1 |
| Rubcn         | 4.717  | 4.115  | 3.709  | 3.699  | 4.482  | 4.249  | 3.846  | 3.664  | 3.986  | 3.648  | 100502698 | RUBCN    | NM_172615_16_-1 |
| C330027C09Rik | 1.502  | 1.186  | 3.180  | 3.501  | 3.199  | 2.697  | 2.462  | 2.041  | 1.470  | 0.964  | 224171    | KIAA1524 | NM_172616_16_+1 |
| Zfp523        | 3.886  | 3.682  | 2.481  | 2.141  | 2.461  | 2.724  | 2.230  | 2.445  | 2.063  | 1.486  | 224656    | ZNF76    | NM_172617_17_+1 |
| Btdb9         | 0.456  | -1.525 | 3.320  | -3.877 | 2.937  | -3.192 | 1.880  | -4.711 | 1.566  | -4.232 | 224671    | BTD9     | NM_172618_17_-1 |
| Adamts10      | 0.885  | -0.145 | 1.612  | 0.191  | 1.738  | 0.263  | 1.913  | 3.062  | 3.843  | 4.174  | 224697    | ADAMTS10 | NM_172619_17_+1 |
| Vps52         | 5.370  | 5.244  | 5.630  | 5.696  | 6.023  | 5.984  | 5.700  | 5.822  | 6.356  | 6.093  | 224705    | VPS52    | NM_172620_17_+1 |
| Clic5         | -1.562 | -0.302 | -3.397 | -1.863 | -2.156 | -3.354 | -2.661 | -1.248 | -0.727 | -0.174 | 224796    | CLIC5    | NM_172621_17_+1 |



|               |        |        |        |        |        |        |        |        |        |        |        |            |                 |
|---------------|--------|--------|--------|--------|--------|--------|--------|--------|--------|--------|--------|------------|-----------------|
| Guf1          | 4.198  | 4.443  | 4.359  | 4.506  | 4.429  | 4.467  | 4.016  | 4.256  | 3.798  | 3.883  | 231279 | GUF1       | NM_172711_5_+1  |
| Uba6          | 2.868  | 3.372  | 4.712  | 4.622  | 4.320  | 4.018  | 3.925  | 4.168  | 3.745  | 4.457  | 231380 | UBA6       | NM_172712_5_-1  |
| Sdad1         | 4.529  | 3.849  | 7.423  | 7.354  | 5.076  | 4.623  | 5.419  | 5.892  | 5.896  | 5.636  | 231452 | SDAD1      | NM_172713_5_-1  |
| Lin54         | -3.014 | 1.125  | 2.932  | 2.751  | 2.614  | 1.883  | 3.023  | 2.295  | 2.723  | 3.346  | 231506 | LIN54      | NM_172714_5_-1  |
| Agpat3        | 3.073  | 1.977  | -0.501 | -0.255 | -1.538 | -0.281 | -1.120 | 0.886  | 0.458  | 1.019  | 231510 | GPAT3      | NM_172715_5_+1  |
| Pcgf3         | 2.620  | 2.751  | 2.945  | 3.182  | 2.864  | 2.816  | 2.937  | 3.016  | 3.981  | 4.068  | 69587  | PCGF3      | NM_172716_5_+1  |
| Chfr          | 2.266  | 2.299  | 1.915  | 1.627  | 1.770  | -1.243 | 2.729  | 1.779  | 3.496  | 2.505  | 231600 | CHFR       | NM_172717_5_+1  |
| Gcn111        | 3.646  | 3.945  | 4.651  | 4.741  | 4.906  | 4.916  | 4.611  | 4.993  | 5.080  | 5.216  | 231659 | GCN1       | NM_172719_5_+1  |
| Fbxw8         | 3.183  | 3.210  | 3.739  | 3.881  | 3.837  | 3.788  | 3.322  | 3.641  | 4.637  | 4.337  | 231672 | FBXW8      | NM_172721_5_-1  |
| Naa25         | 3.885  | 3.945  | 5.297  | 5.238  | 4.363  | 4.208  | 4.560  | 4.569  | 5.101  | 4.810  | 231713 | NAA25      | NM_172722_5_+1  |
| Adap1         | 2.249  | 1.076  | 5.039  | 5.125  | 7.485  | 7.219  | 7.468  | 7.142  | 7.884  | 7.864  | 231821 | ADAP1      | NM_172723_5_-1  |
| Ap5z1         | 3.756  | 3.925  | 4.520  | 4.344  | 4.573  | 4.755  | 4.580  | 4.489  | 5.120  | 4.851  | 231855 | AP5Z1      | NM_172725_5_+1  |
| E130309D02Rik | 4.116  | 3.737  | 4.831  | 4.980  | 4.420  | 4.198  | 4.045  | 4.334  | 4.804  | 4.417  | 231868 | C7orf26    | NM_172726_5_-1  |
| Fam221a       | 0.672  | -2.479 | -1.766 | -3.568 | -0.594 | -4.924 | -0.863 | -4.868 | -1.533 | -4.737 | 231946 | FAM221A    | NM_172727_6_+1  |
| Creb5         | -4.981 | -4.981 | -4.722 | -3.290 | -3.235 | -4.796 | -0.830 | -1.165 | -0.884 | -0.617 | 231991 | CREB5      | NM_172728_6_+1  |
| Nod1          | 0.239  | -0.772 | 3.369  | 1.379  | 5.944  | 4.969  | 5.348  | 4.208  | 6.116  | 5.143  | 107607 | NOD1       | NM_172729_6_-1  |
| Ccdc174       | 5.016  | 5.075  | 4.375  | 4.292  | 4.725  | 4.685  | 4.624  | 4.196  | 4.244  | 3.984  | 232236 | CCDC174    | NM_172730_6_+1  |
| Fgd5          | -2.948 | -4.981 | -4.983 | -1.878 | -2.201 | -0.291 | -1.771 | -3.044 | -4.394 | -4.981 | 232237 | FGD5       | NM_172731_6_+1  |
| Clec9a        | 4.735  | 4.708  | 5.840  | 6.504  | -0.475 | -1.511 | 1.917  | 2.807  | -2.512 | -0.879 | 232414 | CLEC9A     | NM_172732_6_+1  |
| Dera          | 5.606  | 5.561  | 5.319  | 5.467  | 5.607  | 5.671  | 5.262  | 5.399  | 5.267  | 5.320  | 232449 | DERA       | NM_172733_6_+1  |
| Stk38l        | 5.289  | 5.491  | 3.531  | 2.937  | 3.971  | 3.541  | 3.883  | 2.597  | 2.964  | 1.214  | 232533 | STK38L     | NM_172734_6_+1  |
| Zc3hc1        | 4.626  | 4.563  | 4.153  | 4.425  | 4.165  | 4.166  | 4.237  | 4.341  | 4.420  | 4.031  | 232679 | ZC3HC1     | NM_172735_6_-1  |
| Leng8         | 4.670  | 4.600  | 5.962  | 5.762  | 6.505  | 6.513  | 6.478  | 6.269  | 7.520  | 7.470  | 232798 | LENG8      | NM_172736_7_+1  |
| Shisa7        | -2.091 | -2.210 | -4.861 | -4.925 | -4.981 | -4.981 | -4.957 | -4.704 | -4.981 | -4.981 | 232813 | SHISA7     | NM_172737_7_-1  |
| Zfp954        | 4.040  | 4.251  | 3.642  | 3.954  | 3.593  | 3.721  | 3.739  | 3.871  | 4.032  | 4.167  | 232853 | NA         | NM_172738_7_-1  |
| Arhgap35      | 2.425  | 2.097  | 2.792  | 2.517  | 3.324  | 3.283  | 2.341  | 1.588  | 1.820  | 1.989  | 232906 | ARHGAP35   | NM_172739_7_-1  |
| Zfp420        | 2.443  | 2.426  | 0.441  | -0.063 | 1.264  | 1.583  | -0.039 | 1.347  | 0.821  | 1.259  | 233058 | ZNF420     | NM_172740_7_+1  |
| 4931406P16Rik | 3.772  | 3.880  | 4.165  | 4.105  | 3.883  | 3.887  | 3.589  | 3.806  | 4.440  | 4.680  | 233103 | KIAA0355   | NM_172741_7_-1  |
| Mtmr10        | 2.395  | 1.888  | 3.676  | 3.456  | 1.814  | 2.105  | 3.282  | 3.480  | 5.443  | 5.489  | 233315 | MTMR10     | NM_172742_7_+1  |
| Plekha7       | 0.451  | 1.375  | -2.076 | -1.969 | -1.668 | -1.788 | -4.523 | -3.501 | -4.981 | -4.906 | 233765 | PLEKHA7    | NM_172743_7_-1  |
| Tufm          | 6.151  | 6.140  | 5.876  | 6.173  | 5.786  | 5.826  | 5.773  | 5.908  | 5.466  | 5.447  | 233870 | TUFM       | NM_172745_7_+1  |
| Hirip3        | 1.110  | 1.843  | 2.505  | 2.311  | 3.021  | 2.824  | 2.540  | 2.104  | 0.662  | 1.450  | 233876 | HIRIP3     | NM_172746_7_+1  |
| Kctd13        | 5.206  | 5.244  | 4.672  | 4.722  | 5.186  | 5.164  | 4.673  | 4.584  | 4.489  | 4.232  | 233877 | KCTD13     | NM_172747_7_+1  |
| Fbxl19        | 0.901  | 1.044  | 0.640  | 0.368  | 0.791  | 0.885  | 0.552  | 0.517  | -0.236 | 0.364  | 233902 | FBXL19     | NM_172748_7_+1  |
| Zfp646        | 3.564  | 3.628  | 3.680  | 3.610  | 4.065  | 3.860  | 3.724  | 3.969  | 4.811  | 5.044  | 233905 | ZNF646     | NM_172749_7_+1  |
| Arhgef10      | -0.284 | -0.397 | -0.771 | -2.635 | -3.286 | -2.304 | -2.314 | -0.973 | -2.904 | -2.442 | 234094 | ARHGEF10   | NM_172751_8_+1  |
| Sorbs2        | -4.981 | -4.981 | -4.930 | -2.430 | -4.683 | -2.629 | -3.593 | -3.288 | -4.981 | -2.118 | 234214 | SORBS2     | NM_172752_8_+1  |
| Csgalnact1    | -4.981 | -4.981 | -2.143 | -0.765 | -3.232 | -3.411 | -2.334 | -2.514 | -4.394 | -4.981 | 234356 | CSGALNACT1 | NM_172753_8_-1  |
| Zfp868        | 4.016  | 4.326  | 3.929  | 3.706  | 3.979  | 3.982  | 3.804  | 4.049  | 3.627  | 4.170  | 234362 | NA         | NM_172754_8_-1  |
| Sugp2         | 3.253  | 3.044  | 3.594  | 3.598  | 3.936  | 3.699  | 3.399  | 3.534  | 3.416  | 3.443  | 234373 | SUGP2      | NM_172755_8_+1  |
| Ankle1        | -1.529 | -0.366 | 0.685  | 0.776  | 2.687  | 2.206  | 2.083  | 1.445  | -0.083 | -0.037 | 234396 | ANKLE1     | NM_172756_8_+1  |
| Heatr3        | 3.590  | 3.698  | 4.081  | 3.993  | 3.882  | 4.143  | 3.933  | 3.632  | 4.001  | 4.151  | 234549 | HEATR3     | NM_172757_8_+1  |
| Slc38a7       | 2.704  | 2.807  | 2.573  | 2.844  | 2.539  | 2.461  | 2.775  | 3.004  | 4.085  | 3.974  | 234595 | SLC38A7    | NM_172758_8_-1  |
| Elmo3         | -0.018 | -0.141 | 0.210  | 1.763  | 0.116  | 0.906  | -1.034 | -0.608 | -1.304 | -1.302 | 234683 | ELMO3      | NM_172760_8_+1  |
| Mthfsd        | 2.230  | 2.323  | 2.257  | 1.745  | 2.237  | 2.597  | 2.033  | 2.538  | 2.300  | 2.083  | 234814 | MTHFSD     | NM_172761_8_-1  |
| Rbm34         | 5.441  | 5.564  | 5.009  | 4.979  | 4.923  | 4.988  | 4.966  | 4.681  | 4.186  | 4.106  | 52202  | RBM34      | NM_172762_8_-1  |
| Zfp809        | 2.753  | 1.718  | 2.493  | 0.749  | 2.930  | 0.965  | 2.254  | 0.984  | 2.561  | 1.673  | 235047 | NA         | NM_172763_9_+1  |
| Zbtb44        | 1.782  | 0.352  | 1.601  | 1.534  | 0.627  | 1.649  | -0.049 | -0.157 | 2.470  | 2.477  | 235132 | ZBTB44     | NM_172765_9_+1  |
| Nfrkb         | 4.077  | 4.013  | 4.298  | 3.962  | 4.623  | 4.520  | 4.209  | 4.093  | 4.313  | 4.325  | 235134 | NFRKB      | NM_172766_9_+1  |
| Vwa5a         | 4.585  | 4.762  | 6.158  | 6.095  | 5.095  | 5.414  | 5.601  | 6.081  | 7.041  | 7.920  | 67776  | VWA5A      | NM_172767_9_+1  |
| Gramd1b       | 3.864  | 3.456  | 3.085  | 3.162  | 3.216  | 3.799  | 2.804  | 2.804  | 2.367  | 2.405  | 235283 | GRAMD1B    | NM_172768_9_-1  |
| Sc5d          | 7.014  | 6.274  | 5.665  | 3.747  | 4.856  | 3.779  | 4.768  | 4.014  | 5.107  | 3.907  | 235293 | SC5D       | NM_172769_9_-1  |
| Ttc12         | -2.842 | -3.267 | -2.355 | -1.206 | -2.834 | -2.535 | -1.542 | -0.976 | 0.301  | 0.591  | 235330 | TTC12      | NM_172770_9_-1  |
| Dmxl2         | -0.749 | 1.379  | -2.043 | -0.600 | 0.196  | 2.235  | 1.539  | 2.601  | 4.231  | 4.990  | 235380 | DMXL2      | NM_172771_9_-1  |
| Fam63b        | 6.178  | 6.335  | 4.524  | 4.518  | 5.282  | 5.052  | 5.633  | 5.626  | 6.083  | 6.178  | 235461 | FAM63B     | NM_172772_9_-1  |
| Slc17a5       | 3.151  | 3.555  | 2.733  | 2.808  | 2.720  | 3.005  | 2.905  | 4.039  | 4.665  | 5.058  | 235504 | SLC17A5    | NM_172773_9_-1  |
| Atrip         | 4.231  | 3.808  | 3.653  | 3.427  | 4.129  | 3.761  | 4.165  | 3.646  | 3.958  | 3.397  | 235610 | ATRIP      | NM_172774_9_-1  |
| Plxnb1        | -2.686 | -4.981 | -3.957 | -3.748 | -5.010 | -3.596 | -4.938 | -4.494 | -4.981 | -4.981 | 235611 | PLXNB1     | NM_172775_9_+1  |
| Gbp9          | 4.421  | 4.284  | 6.330  | 6.092  | 6.896  | 6.465  | 6.806  | 6.549  | 6.111  | 5.731  | 236573 | GBP9       | NM_172777_5_-1  |
| Maob          | -4.981 | -4.981 | -4.977 | -4.977 | -4.885 | -4.001 | -3.117 | -0.246 | 0.480  | 4.649  | 109731 | MAOB       | NM_172778_X_-1  |
| Ints6l        | 4.701  | 5.022  | 4.080  | 3.776  | 5.152  | 5.286  | 5.241  | 5.225  | 6.352  | 6.509  | 236790 | INTS6L     | NM_172779_X_+1  |
| Slc9a6        | 2.850  | 3.023  | 4.093  | 3.929  | 3.134  | 3.552  | 3.511  | 3.742  | 4.406  | 4.767  | 236794 | SLC9A6     | NM_172780_X_+1  |
| Klhl4         | -4.325 | 0.155  | -4.384 | -4.960 | -4.878 | -4.945 | -4.970 | -4.668 | -4.981 | -4.981 | 237010 | KLHL4      | NM_172781_X_+1  |
| Nxt2          | 3.412  | 3.864  | 3.659  | 3.594  | 3.058  | 2.471  | 3.634  | 3.044  | 3.897  | 3.312  | 237082 | NXT2       | NM_172782_X_+1  |
| Phka2         | 2.821  | 2.513  | 4.303  | 3.900  | 3.053  | 2.611  | 3.210  | 3.453  | 4.771  | 4.605  | 110094 | PHKA2      | NM_172783_X_+1  |
| Lrp11         | -0.433 | -1.842 | -0.620 | -0.802 | -1.093 | -0.926 | -1.628 | -0.438 | -1.640 | -0.788 | 237253 | LRP11      | NM_172784_10_+1 |
| Zc3h12d       | 3.823  | 1.902  | 5.404  | 5.093  | 5.166  | 4.797  | 4.273  | 3.827  | 3.994  | 3.787  | 237256 | ZC3H12D    | NM_172785_10_+1 |
| L3mbtl3       | 4.259  | 4.430  | 2.340  | 1.931  | 2.381  | 2.280  | 2.788  | 2.267  | 3.213  | 3.231  | 237339 | L3MBTL3    | NM_172787_10_-1 |
| Ankrd52       | 1.526  | 1.121  | 2.761  | 3.266  | 2.982  | 2.860  | 2.290  | 2.599  | 3.190  | 3.262  | 237615 | ANKRD52    | NM_172790_10_+1 |
| Pla2g3        | -4.981 | -3.267 | -4.940 | -4.432 | -4.883 | -4.241 | -4.229 | -4.970 | -4.394 | -3.209 | 237625 | PLA2G3     | NM_172791_11_+1 |
| Btnl9         | -2.948 | -4.981 | -4.421 | -4.842 | -4.524 | -4.145 | -4.455 | -1.568 | -0.768 | -3.853 | 237754 | BTNL9      | NM_172793_11_-1 |
| Sarm1         | -2.254 | -0.371 | 1.346  | 0.748  | -1.005 | -0.682 | -2.025 | -2.753 | -3.607 | -3.322 | 237868 | SARM1      | NM_172795_11_-1 |
| Slfm9         | 1.417  | 0.777  | 2.433  | 2.096  | 1.988  | 1.443  | 2.120  | 2.053  | 3.886  | 3.552  | 237886 | SLFM9      | NM_172796_11_-1 |
| Mmp28         | -3.041 | -4.981 | 1.747  | 1.177  | -3.472 | -2.322 | -0.171 | 0.213  | 0.264  | 0.354  | 118453 | MMP28      | NM_172797_11_-1 |

|               |        |        |        |        |        |        |        |        |        |        |        |                |                  |
|---------------|--------|--------|--------|--------|--------|--------|--------|--------|--------|--------|--------|----------------|------------------|
| Dock4         | 0.587  | 0.288  | 2.674  | 3.104  | 4.657  | 4.233  | 3.958  | 3.533  | 4.272  | 4.179  | 238130 | DOCK4          | NM_172803_12_+_1 |
| Btbd7         | 2.998  | 3.326  | 3.417  | 3.550  | 3.723  | 3.426  | 3.629  | 3.367  | 3.826  | 3.875  | 238386 | BTBD7          | NM_172806_12_-_1 |
| Ppww1         | 2.631  | 2.879  | 2.414  | 1.980  | 2.936  | 2.801  | 2.538  | 2.221  | 1.920  | 2.129  | 238831 | PPWD1          | NM_172807_13_-_1 |
| Sacs          | -1.065 | -0.312 | -0.081 | -0.300 | -0.091 | -1.297 | -0.848 | 0.033  | 0.144  | -0.314 | 50720  | NA             | NM_172809_14_+_1 |
| Gucy1b2       | -4.981 | -4.981 | -4.967 | -4.944 | -4.875 | -4.976 | -4.797 | -4.903 | -4.981 | -4.981 | 239134 | NA             | NM_172810_14_-_1 |
| Htr2a         | -4.981 | -4.981 | -4.915 | -3.451 | -4.343 | -4.761 | -3.687 | -4.082 | -3.925 | -3.233 | 15558  | HTR2A          | NM_172812_14_+_1 |
| Enox1         | -0.463 | -1.183 | -3.687 | -4.803 | -4.121 | -4.194 | -4.956 | -4.938 | -4.981 | -3.193 | 239188 | ENOX1          | NM_172813_14_+_1 |
| Lrp12         | 2.178  | 1.800  | -0.984 | 0.159  | 0.309  | 0.354  | 0.710  | 1.209  | 2.187  | 2.467  | 239393 | LRP12          | NM_172814_15_-_1 |
| Zfp647        | -0.375 | 0.468  | -2.153 | -1.400 | -0.877 | -0.581 | -1.010 | -0.778 | -0.857 | -0.257 | 239546 | ZNF250         | NM_172817_15_-_1 |
| Dip2b         | -0.329 | 0.088  | 0.026  | 0.285  | 0.536  | 0.638  | 0.302  | 0.304  | 1.871  | 2.679  | 239667 | DIP2B          | NM_172819_15_+_1 |
| Map3k13       | -3.090 | -4.981 | -4.950 | -3.278 | -2.627 | -4.196 | -3.949 | -4.139 | -4.981 | -3.855 | 71751  | MAP3K13        | NM_172821_16_+_1 |
| Pigz          | -1.126 | -2.895 | 1.722  | 2.111  | 0.787  | -0.024 | 1.442  | 1.480  | 0.952  | 1.176  | 239827 | PIGZ           | NM_172822_16_+_1 |
| Lmln          | 0.443  | 0.794  | 0.191  | 0.655  | 1.057  | 1.715  | 0.698  | 0.565  | 1.324  | 1.453  | 239833 | LMLN           | NM_172823_16_+_1 |
| Ccdc14        | 1.294  | 1.759  | 1.143  | 0.307  | 1.932  | 1.396  | 1.306  | 0.771  | 0.835  | 0.637  | 239839 | CCDC14         | NM_172824_16_+_1 |
| Adgrg7        | -4.981 | -4.981 | -4.972 | -4.972 | -4.923 | -4.420 | -4.935 | -4.463 | -3.531 | -2.407 | 239853 | ADGRG7         | NM_172825_16_-_1 |
| Lnpep         | 3.454  | 3.995  | 4.396  | 4.479  | 4.922  | 4.717  | 4.793  | 4.560  | 5.002  | 5.392  | 240028 | LNPEP          | NM_172827_17_-_1 |
| Slc4a9        | -4.981 | -4.981 | -1.209 | -1.650 | -4.981 | -4.981 | -4.981 | -4.981 | -4.981 | -4.981 | 240215 | SLC4A9         | NM_172830_18_+_1 |
| Pcyox1l       | 1.636  | 2.453  | 1.758  | 2.523  | 1.542  | 2.321  | 1.656  | 2.390  | 2.021  | 2.538  | 240334 | PCYOX1L        | NM_172832_18_-_1 |
| Malt1         | 5.683  | 5.483  | 5.961  | 5.583  | 7.519  | 7.402  | 6.458  | 5.981  | 6.793  | 6.912  | 240354 | MALT1          | NM_172833_18_+_1 |
| Peli3         | -4.981 | -2.600 | -4.972 | -4.972 | -3.025 | -1.122 | -3.321 | -3.849 | -2.514 | -1.977 | 240518 | PELI3          | NM_172835_19_-_1 |
| 9930021J03Rik | 4.258  | 4.427  | 4.202  | 4.073  | 4.287  | 4.216  | 4.166  | 3.850  | 3.541  | 3.504  | 240613 | KIAA2026       | NM_172836_19_-_1 |
|               | 2.608  | 2.151  | 1.617  | 1.777  | 1.554  | 1.557  | 1.727  | 1.799  | 3.302  | 2.750  | 240665 | CCNJ           | NM_172839_19_+_1 |
| Slco5a1       | -1.009 | -4.981 | 3.962  | 3.785  | 5.470  | 4.958  | 3.543  | 1.992  | -4.981 | -4.981 | 240726 | SLCO5A1        | NM_172841_1_-_1  |
| Lax1          | 1.360  | -1.073 | -1.960 | -1.464 | -1.711 | 0.143  | -1.378 | 2.668  | -0.650 | -3.151 | 240754 | LAX1           | NM_172842_1_-_1  |
| Tor1aip2      | 2.960  | 2.881  | 4.467  | 3.080  | 3.413  | 2.995  | 3.075  | 2.976  | 4.566  | 4.674  | 240832 | TOR1AIP2       | NM_172843_1_+_1  |
| Adamts4       | -4.981 | -4.981 | -4.920 | -4.920 | -3.801 | -4.571 | -4.659 | -4.584 | -4.981 | -4.981 | 240913 | ADAMTS4        | NM_172845_1_+_1  |
| Ankmy1        | -1.099 | -1.263 | -2.902 | -4.619 | -4.276 | -4.720 | -2.945 | -2.445 | -4.981 | -3.098 | 241158 | ANKMY1         | NM_172850_1_-_1  |
| Olfml2a       | -0.861 | -1.088 | -1.961 | -2.860 | -3.522 | -3.856 | -4.938 | -4.313 | -4.190 | -4.227 | 241327 | OLFML2A        | NM_172854_2_+_1  |
| Cers6         | 4.060  | 4.824  | 3.179  | 3.980  | 5.507  | 6.039  | 4.917  | 5.444  | 6.747  | 7.147  | 241447 | CERS6          | NM_172856_2_+_1  |
| Exd1          | -3.668 | 0.122  | -1.569 | -2.293 | -2.404 | -0.653 | -2.099 | -2.406 | -3.925 | -2.152 | 241624 | EXD1           | NM_172857_2_-_1  |
| Dzank1        | -1.807 | -4.981 | -4.705 | -4.547 | -3.406 | -3.386 | -3.721 | -2.654 | -4.981 | -3.617 | 241688 | DZANK1         | NM_172859_2_-_1  |
| Cbfa2t2       | 3.180  | 3.701  | 3.238  | 2.972  | 3.112  | 2.330  | 3.283  | 3.493  | 3.887  | 3.706  | 12396  | CBFA2T2        | NM_172860_2_+_1  |
| Slc7a14       | 0.000  | 1.067  | 1.386  | -0.048 | 0.885  | 0.515  | 0.637  | 0.292  | 0.986  | -0.298 | 241919 | SLC7A14        | NM_172861_3_-_1  |
| Zfp697        | -1.627 | -4.981 | -4.981 | -4.981 | -4.981 | -4.981 | -4.949 | -4.965 | -3.531 | -2.283 | 242109 | ZNF697         | NM_172863_3_+_1  |
| Manea         | 4.218  | 4.470  | 3.049  | 3.199  | 3.467  | 3.379  | 3.103  | 3.690  | 3.560  | 3.762  | 242362 | MANEA          | NM_172865_4_-_1  |
| Rgp1          | 5.545  | 5.569  | 3.675  | 3.836  | 3.947  | 4.160  | 3.499  | 3.384  | 3.358  | 3.058  | 242406 | RGP1           | NM_172866_4_+_1  |
| Palm2         | -3.843 | -4.981 | -4.923 | -3.300 | -4.367 | -4.352 | -4.951 | -4.890 | -4.981 | -4.981 | 242481 | PALM2          | NM_172868_4_+_1  |
| Klhl9         | 5.406  | 5.136  | 4.555  | 4.470  | 4.265  | 4.024  | 4.523  | 4.300  | 5.948  | 5.659  | 242521 | KLHL9          | NM_172871_4_-_1  |
| Azin2         | -0.907 | -0.061 | -0.341 | 0.588  | -0.550 | 0.125  | 0.598  | 0.800  | 1.832  | 1.184  | 242669 | AZIN2          | NM_172875_4_-_1  |
| Gpatch3       | 3.403  | 3.652  | 3.358  | 3.309  | 3.646  | 3.447  | 3.547  | 3.424  | 4.021  | 3.540  | 242691 | GPATCH3        | NM_172876_4_+_1  |
| Pramef8       | 4.061  | 3.858  | 4.605  | 4.186  | 4.343  | 4.213  | 4.042  | 4.066  | 4.265  | 4.683  | 242736 | PRAMEF7 PRAMEF | NM_172877_4_+_1  |
| Lrrd1         | -4.981 | -3.315 | -4.589 | -4.833 | -3.114 | -3.955 | -4.860 | -4.964 | -3.750 | -4.981 | 242838 | LRRD1          | NM_172879_5_+_1  |
| Wdfy3         | 1.448  | 0.214  | 5.123  | 5.370  | 3.828  | 3.554  | 4.751  | 4.913  | 6.154  | 6.713  | 72145  | WDFY3          | NM_172882_5_-_1  |
| Mfsd7a        | 0.618  | 1.815  | 1.784  | 2.101  | 2.165  | 2.588  | 3.118  | 2.738  | 5.162  | 5.041  | 243197 | MFSD7          | NM_172883_5_-_1  |
| 2900026A02Rik | -2.075 | -4.981 | 1.922  | 1.031  | 4.344  | 4.621  | 3.034  | 2.354  | 0.042  | -0.515 | 243219 | NA             | NM_172884_5_-_1  |
|               | 0.153  | 1.575  | -1.193 | -0.625 | 0.647  | 0.982  | 2.753  | 2.407  | 5.247  | 5.006  | 320365 | FRY            | NM_172887_5_+_1  |
| Styk1         | -4.981 | -4.981 | -4.962 | -4.962 | -4.855 | -4.974 | -2.421 | -4.977 | -0.885 | -4.981 | 243659 | STYK1          | NM_172891_6_-_1  |
| Parp12        | 1.319  | -0.494 | 6.336  | 5.947  | 4.775  | 4.291  | 5.226  | 5.113  | 6.938  | 6.382  | 243771 | PARP12         | NM_172893_6_-_1  |
| Ppp6r1        | 6.342  | 6.728  | 6.514  | 6.828  | 6.824  | 7.067  | 6.708  | 7.021  | 7.462  | 7.732  | 243819 | PPP6R1         | NM_172894_7_-_1  |
| Kirrel2       | -4.981 | -2.883 | -4.962 | -4.349 | -4.791 | -4.961 | -4.943 | -4.917 | -4.981 | -4.981 | 243911 | KIRREL2        | NM_172898_7_-_1  |
| Siglecg       | 6.586  | 6.904  | 5.013  | 5.530  | 8.330  | 8.085  | 6.958  | 6.743  | 2.471  | 1.717  | 243958 | SIGLEC10       | NM_172900_7_+_1  |
| Man2a2        | 6.494  | 5.945  | 3.583  | 3.308  | 4.173  | 4.367  | 4.348  | 4.012  | 5.933  | 5.080  | 140481 | MAN2A2         | NM_172903_7_-_1  |
| Fsd2          | 0.895  | -1.317 | -0.912 | -3.221 | 0.088  | -4.923 | -1.389 | -4.930 | -2.501 | -4.981 | 244091 | FSD2           | NM_172904_7_-_1  |
| Cd163l1       | -4.981 | -4.981 | -4.433 | -3.501 | -4.963 | -1.302 | -4.634 | -4.623 | -4.981 | -4.981 | 244233 | NA             | NM_172909_7_+_1  |
| D8Ertdd82e    | -0.781 | 0.806  | -3.984 | -0.712 | -2.128 | -0.235 | 0.148  | 2.320  | 1.170  | 2.255  | 244418 | SGK223         | NM_172911_8_+_1  |
| Tox3          | 1.238  | -4.981 | -3.187 | -4.338 | -1.068 | -4.599 | -3.483 | -4.983 | -1.129 | -4.981 | 244579 | TOX3           | NM_172913_8_-_1  |
| Zfp317        | 4.441  | 4.396  | 3.361  | 3.493  | 3.634  | 3.846  | 3.511  | 3.590  | 3.611  | 3.799  | 244713 | ZNF317         | NM_172918_9_+_1  |
| Zfp846        | 2.436  | 2.662  | 1.886  | 1.885  | 2.652  | 2.527  | 2.548  | 1.882  | 2.444  | 2.731  | 244721 | ZNF846         | NM_172919_9_+_1  |
| Dpy19l1       | 6.297  | 6.199  | 7.932  | 7.526  | 7.032  | 7.048  | 7.185  | 7.248  | 7.424  | 7.739  | 244745 | DPY19L1        | NM_172920_9_-_1  |
| Nxpe4         | 4.021  | 1.186  | 0.891  | -0.048 | 4.230  | -0.151 | 6.539  | 2.308  | 7.808  | 3.353  | 244853 | NXPE4          | NM_172921_9_+_1  |
| Tmem266       | 1.732  | 1.869  | -2.387 | -3.019 | -1.953 | -0.112 | -3.461 | -2.630 | -4.981 | -4.981 | 244886 | TMEM266        | NM_172923_9_+_1  |
| Peak1         | 2.225  | 1.972  | 4.856  | 4.721  | 5.538  | 5.217  | 4.565  | 3.913  | 3.542  | 3.687  | 244895 | PEAK1          | NM_172924_9_-_1  |
| Klhl31        | -4.981 | -4.981 | -4.912 | -4.401 | -4.867 | -4.685 | -4.948 | -4.925 | -3.043 | -4.981 | 244923 | KLHL31         | NM_172925_9_+_1  |
| Snx14         | 3.101  | 3.126  | 4.283  | 4.779  | 4.497  | 4.871  | 4.387  | 4.775  | 4.793  | 5.416  | 244962 | SNX14          | NM_172926_9_-_1  |
| Tmem255a      | -4.371 | -4.114 | -4.792 | -4.847 | -4.784 | -4.935 | -4.973 | -4.339 | -4.981 | -4.727 | 245386 | TMEM255A       | NM_172930_X_-_1  |
| Nlgn3         | -4.981 | -4.981 | -4.125 | -4.649 | -3.808 | -4.860 | -3.267 | -2.761 | -4.981 | -4.981 | 245537 | NLGN3          | NM_172932_X_+_1  |
| Amdhd2        | 5.618  | 5.118  | 4.893  | 5.068  | 5.066  | 4.953  | 5.309  | 4.904  | 5.252  | 5.024  | 245847 | AMDHD2         | NM_172935_17_-_1 |
| Shprh         | -0.570 | -4.297 | -1.884 | -2.869 | -0.722 | -0.248 | -0.338 | -1.088 | -0.826 | 0.943  | 268281 | SHPRH          | NM_172937_10_+_1 |
| Scml4         | 2.025  | 2.416  | -0.501 | -0.144 | 0.462  | 1.014  | 0.069  | 1.682  | 0.154  | -0.732 | 268297 | SCML4          | NM_172938_10_+_1 |
| Sowahc        | 4.859  | 4.044  | 6.229  | 5.891  | 5.412  | 4.828  | 6.886  | 6.739  | 7.167  | 7.466  | 268301 | SOWAHC         | NM_172939_10_+_1 |
| Zkscan17      | 2.562  | 2.536  | 0.999  | 2.644  | 1.910  | 1.719  | 0.986  | 1.530  | 2.667  | 2.401  | 268417 | ZNF496         | NM_172941_11_-_1 |
| Alkbh5        | 4.343  | 4.128  | 4.444  | 4.415  | 4.483  | 4.333  | 4.486  | 4.431  | 4.984  | 5.030  | 268420 | ALKBH5         | NM_172943_11_+_1 |
| Itgae         | -4.981 | -1.972 | 3.406  | 3.119  | -3.119 | -3.854 | -3.565 | -1.263 | -1.540 | -1.677 | 16407  | ITGAE          | NM_172944_11_+_1 |
| Ankrd13b      | -3.349 | -2.883 | -0.873 | -1.246 | -2.174 | -2.651 | -1.239 | -0.630 | 1.047  | 1.243  | 268445 | ANKRD13B       | NM_172945_11_-_1 |

|               |          |        |        |        |        |        |        |        |        |        |        |        |          |                  |
|---------------|----------|--------|--------|--------|--------|--------|--------|--------|--------|--------|--------|--------|----------|------------------|
|               | Krt222   | 0.719  | -0.824 | -3.345 | -2.434 | -0.762 | -1.727 | -2.038 | -0.435 | -4.981 | -4.981 | 268481 | KRT222   | NM_172946_11_-_1 |
|               | Lsm12    | 5.637  | 5.459  | 5.670  | 5.798  | 5.425  | 5.507  | 5.273  | 5.276  | 4.544  | 4.654  | 268490 | LSM12    | NM_172947_11_-_1 |
|               | Lpin1    | 3.055  | 3.277  | 4.989  | 3.824  | 3.075  | 2.805  | 3.667  | 2.735  | 4.333  | 3.084  | 14245  | LPIN1    | NM_172950_12_-_1 |
|               | Sntg2    | 2.373  | 4.435  | -4.943 | -1.613 | -4.948 | -4.365 | -4.972 | -3.836 | -4.981 | -4.981 | 268534 | SNTG2    | NM_172951_12_-_1 |
|               | Gphn     | -4.769 | -4.487 | -1.253 | -2.901 | -2.965 | -3.890 | -4.745 | -3.803 | -4.842 | -4.905 | 268566 | GPHN     | NM_172952_12_+_1 |
|               | Serpina5 | -4.981 | -4.981 | -4.981 | -4.981 | -4.329 | 2.465  | -4.886 | -1.769 | -4.981 | -4.981 | 268591 | SERPINA5 | NM_172953_12_+_1 |
|               | Vcan     | -4.981 | -4.981 | -4.981 | -4.981 | -4.971 | -4.966 | -4.598 | -4.204 | -0.318 | 1.290  | 13003  | VCAN     | NM_172955_13_-_1 |
|               | Mtmr12   | 3.649  | 4.481  | 4.825  | 5.031  | 5.135  | 5.276  | 4.924  | 5.161  | 5.096  | 5.824  | 268783 | MTMR12   | NM_172958_15_+_1 |
|               | Adck5    | 3.207  | 3.827  | 3.749  | 4.433  | 2.254  | 2.725  | 2.250  | 2.858  | 0.529  | 2.100  | 268822 | ADCK5    | NM_172960_15_+_1 |
|               | Abat     | -4.273 | -4.981 | -4.913 | -4.835 | -4.941 | -3.116 | -4.942 | -4.962 | -4.855 | -4.686 | 268860 | ABAT     | NM_172961_16_+_1 |
|               | Ddr1     | 3.550  | 4.104  | 0.611  | -0.115 | 4.170  | 4.257  | 2.866  | 1.797  | -3.714 | -4.066 | 12305  | DDR1     | NM_172962_17_-_1 |
|               | Arhgap28 | -1.260 | -0.256 | 4.280  | 4.589  | 4.115  | 5.157  | 2.528  | 2.878  | -1.067 | -0.570 | 268970 | ARHGAP28 | NM_172964_17_-_1 |
|               | Sap130   | 4.050  | 3.686  | 3.735  | 3.610  | 4.100  | 3.874  | 3.787  | 3.466  | 3.613  | 3.591  | 269003 | SAP130   | NM_172965_18_+_1 |
| 4930503L19Rik |          | 3.165  | 3.004  | 3.198  | 3.164  | 3.023  | 2.669  | 2.566  | 2.600  | 1.734  | 1.962  | 269033 | C18orf54 | NM_172967_18_-_1 |
|               | Inpp4a   | -2.318 | -3.092 | -2.319 | -3.883 | -4.256 | -4.603 | -3.057 | -2.438 | -2.315 | -1.360 | 269180 | INPP4A   | NM_172971_1_+_1  |
|               | Cops7b   | 3.659  | 4.114  | 3.999  | 4.228  | 4.082  | 4.009  | 4.002  | 3.926  | 3.931  | 3.857  | 26895  | COPS7B   | NM_172974_1_+_1  |
|               | Gtf3c4   | 2.586  | 2.774  | 3.425  | 3.433  | 3.281  | 3.169  | 3.137  | 3.129  | 3.970  | 4.116  | 269252 | GTF3C4   | NM_172977_2_-_1  |
|               | Slc28a2  | 2.562  | -2.353 | 2.870  | 0.061  | 2.123  | 1.367  | 3.085  | 3.881  | 5.127  | 5.240  | 269346 | SLC28A2  | NM_172980_2_+_1  |
|               | Nkain3   | -4.981 | -4.981 | -4.082 | -4.451 | -3.771 | -4.783 | -4.954 | -4.799 | -4.981 | -4.195 | 269513 | NKAIN3   | NM_172987_4_-_1  |
|               | Fbxl4    | 4.491  | 4.691  | 3.498  | 3.453  | 3.661  | 3.893  | 3.074  | 3.364  | 3.793  | 3.675  | 269514 | FBXL4    | NM_172988_4_+_1  |
|               | Lpar1    | -4.981 | -4.286 | -3.515 | -4.732 | 0.190  | -0.597 | -0.602 | -0.810 | -0.385 | -4.480 | 14745  | LPAR1    | NM_172989_4_-_1  |
|               | Pank4    | 2.714  | 3.590  | 2.818  | 2.819  | 2.836  | 2.695  | 2.747  | 3.301  | 2.919  | 3.198  | 269614 | PANK4    | NM_172990_4_+_1  |
|               | Rbm48    | 4.608  | 4.284  | 3.477  | 3.539  | 3.984  | 4.071  | 3.963  | 3.833  | 3.661  | 3.485  | 269623 | RBM48    | NM_172991_5_-_1  |
|               | Phtf2    | 2.819  | 3.540  | 3.691  | 4.028  | 4.686  | 4.496  | 4.427  | 4.387  | 3.339  | 4.210  | 68770  | PHTF2    | NM_172992_5_-_1  |
|               | Zfp512   | 4.226  | 3.741  | 3.867  | 3.932  | 4.793  | 4.860  | 4.219  | 4.097  | 4.218  | 4.568  | 269639 | ZNF512   | NM_172993_5_+_1  |
|               | Ppp2r2c  | -3.668 | -3.408 | -4.955 | -4.324 | -2.365 | -3.260 | -4.967 | -4.200 | -4.981 | -4.981 | 269643 | PPP2R2C  | NM_172994_5_+_1  |
|               | Idua     | -1.011 | -3.764 | -3.327 | -4.794 | -1.820 | -4.951 | -4.373 | -3.079 | -1.560 | -1.549 | 15932  | IDUA     | NM_172997_5_+_1  |
|               | Rnft2    | -2.779 | -2.449 | -2.912 | -3.790 | -1.238 | -3.684 | -3.624 | -4.725 | -3.914 | -4.981 | 269695 | RNFT2    | NM_172998_5_-_1  |
|               | Kdm3a    | 3.182  | 1.530  | 3.475  | 3.479  | 3.508  | 2.912  | 3.412  | 3.272  | 4.220  | 3.884  | 104263 | KDM3A    | NM_173001_6_-_1  |
|               | Zxdc     | 3.445  | 3.370  | 3.127  | 3.205  | 3.587  | 3.339  | 3.217  | 3.205  | 4.186  | 4.131  | 80292  | ZXDC     | NM_173002_6_+_1  |
|               | Pon3     | 5.477  | 6.292  | 2.306  | 4.439  | 1.287  | 3.077  | 2.605  | 4.808  | 2.069  | 4.508  | 269823 | PON3     | NM_173006_6_-_1  |
|               | Tspan12  | -4.981 | -4.981 | -4.981 | -4.981 | -3.411 | -4.647 | -4.972 | -4.861 | -4.981 | -3.210 | 269831 | TSpan12  | NM_173007_6_-_1  |
|               | Ssc5d    | -2.178 | -2.997 | -2.821 | -3.042 | -1.624 | -0.600 | -2.807 | -2.808 | -4.981 | -4.342 | 269855 | SSC5D    | NM_173008_7_+_1  |
|               | Ube3a    | 2.084  | 1.656  | 3.579  | 2.734  | 3.776  | 3.026  | 3.325  | 2.145  | 4.146  | 4.451  | 22215  | UBE3A    | NM_173010_7_+_1  |
|               | Idh2     | 7.408  | 7.293  | 6.627  | 6.912  | 7.180  | 7.409  | 6.435  | 6.737  | 6.289  | 6.660  | 269951 | IDH2     | NM_173011_7_-_1  |
|               | Letm2    | 3.770  | 3.409  | 3.012  | 2.227  | 3.494  | 3.291  | 2.799  | 2.161  | 2.311  | 2.032  | 270035 | LETM2    | NM_173012_8_-_1  |
|               | Map1s    | 4.108  | 4.270  | 5.085  | 5.100  | 5.007  | 4.700  | 4.894  | 4.698  | 5.563  | 5.333  | 270058 | MAP1S    | NM_173013_8_+_1  |
|               | Lpcat2   | 2.002  | 0.387  | 4.022  | 6.322  | 6.489  | 7.419  | 6.529  | 6.764  | 6.688  | 6.591  | 270084 | LPCAT2   | NM_173014_8_+_1  |
|               | Mon1b    | 3.285  | 3.441  | 3.096  | 3.182  | 3.768  | 3.429  | 3.724  | 3.204  | 4.805  | 4.644  | 270096 | MON1B    | NM_173015_8_+_1  |
|               | Myo9a    | 4.935  | 4.701  | 6.809  | 6.554  | 5.018  | 5.113  | 4.702  | 4.915  | 4.474  | 4.837  | 270163 | MYO9A    | NM_173018_9_+_1  |
|               | Pfkfb4   | 3.196  | 3.749  | 2.368  | 2.908  | 3.894  | 3.827  | 5.488  | 5.706  | 7.657  | 7.361  | 270198 | PFKFB4   | NM_173019_9_+_1  |
|               | Phka1    | 0.702  | 0.595  | -1.833 | -1.413 | -1.631 | -2.589 | -3.690 | -2.200 | -4.342 | 0.053  | 18679  | PHKA1    | NM_173021_X_-_1  |
| BC048403      |          | 1.537  | 1.769  | 1.348  | 1.466  | 1.713  | 1.565  | 1.332  | 1.529  | 2.347  | 1.582  | 270802 | C12orf66 | NM_173022_10_+_1 |
|               | Zbtb11   | 3.956  | 4.135  | 4.389  | 4.323  | 4.589  | 4.795  | 4.457  | 4.237  | 4.040  | 4.590  | 271377 | ZBTB11   | NM_173026_16_+_1 |
|               | Ip6k3    | -4.981 | -4.981 | -2.841 | -2.303 | -0.436 | -2.344 | 2.572  | 2.586  | 4.270  | 4.158  | 271424 | IP6K3    | NM_173027_17_-_1 |
|               | Vps13a   | 5.749  | 5.508  | 5.158  | 4.953  | 5.131  | 5.271  | 4.728  | 4.572  | 3.317  | 3.930  | 271564 | VPS13A   | NM_173028_19_-_1 |
|               | Tstd2    | 3.598  | 3.713  | 4.148  | 4.321  | 4.042  | 4.040  | 4.231  | 4.326  | 4.766  | 5.076  | 272027 | TSTD2    | NM_173033_4_-_1  |
|               | Zfp398   | -4.981 | -4.861 | -2.361 | -0.200 | -2.579 | -1.094 | -4.297 | -1.506 | -0.904 | -2.416 | 272347 | ZNF398   | NM_173034_6_+_1  |
|               | Adgrg3   | 1.737  | 2.240  | -2.406 | 0.229  | -2.239 | -0.399 | 0.671  | 1.027  | 2.011  | -1.303 | 54672  | ADGRG3   | NM_173036_8_+_1  |
|               | Tango6   | 1.964  | 0.621  | 2.560  | 2.819  | 1.430  | 1.363  | 1.926  | 1.990  | 2.838  | 2.632  | 272538 | TANGO6   | NM_173037_8_+_1  |
|               | Tbcel    | 4.323  | 4.237  | 3.335  | 3.312  | 3.446  | 3.574  | 3.348  | 3.286  | 3.861  | 3.893  | 272589 | TBCEL    | NM_173038_9_-_1  |
|               | Cbr3     | -0.100 | -1.693 | 5.944  | 6.332  | 3.229  | 4.537  | 3.495  | 4.062  | 2.850  | 4.080  | 109857 | CBR3     | NM_173047_16_+_1 |
|               | Gga3     | 1.700  | 1.372  | 3.026  | 2.941  | 3.336  | 2.881  | 2.966  | 2.776  | 4.975  | 4.614  | 260302 | GGA3     | NM_173048_11_-_1 |
|               | Serpib1c | -4.981 | -4.981 | -3.842 | -1.901 | -4.971 | -3.590 | -4.112 | -4.671 | -4.981 | -4.981 | 380839 | NA       | NM_173051_13_-_1 |
|               | Serpib1b | -1.681 | -1.144 | 0.707  | 0.673  | 1.079  | 1.434  | 0.473  | -2.617 | -1.123 | -2.151 | 282663 | NA       | NM_173052_13_+_1 |
|               | Limk2    | 2.098  | 2.503  | -2.361 | 0.098  | 0.640  | 0.938  | -0.997 | 0.498  | 0.034  | 1.109  | 16886  | LIMK2    | NM_173053_11_-_1 |
|               | Ep400    | 5.486  | 5.317  | 5.293  | 5.122  | 5.334  | 5.284  | 5.317  | 4.983  | 5.235  | 5.142  | 75560  | EP400    | NM_173066_5_-_1  |
|               | Adgrb2   | -4.981 | -4.378 | -4.974 | -4.801 | -4.976 | -4.967 | -4.980 | -4.914 | -4.981 | -4.981 | 230775 | ADGRB2   | NM_173071_4_+_1  |
|               | Plk4     | 0.719  | 1.022  | -2.340 | -4.117 | -0.415 | -2.190 | -0.651 | -3.362 | -1.202 | -4.284 | 20873  | PLK4     | NM_173169_3_+_1  |
|               | Pmpca    | 5.417  | 5.723  | 6.009  | 6.131  | 5.793  | 5.772  | 5.734  | 5.814  | 5.901  | 5.818  | 66865  | PMPCA    | NM_173180_2_+_1  |
|               | Zc2hc1a  | 3.167  | 4.072  | 3.229  | 3.951  | 3.445  | 4.171  | 3.079  | 3.729  | 3.038  | 3.793  | 67306  | ZC2HC1A  | NM_173181_3_+_1  |
|               | Fndc3b   | 4.666  | 5.180  | 2.519  | 2.874  | 1.919  | 1.574  | 3.433  | 3.781  | 5.286  | 5.690  | 72007  | FNDC3B   | NM_173182_3_-_1  |
|               | Rln3     | -2.842 | -2.437 | -4.950 | -4.354 | -4.970 | -4.500 | -4.175 | -3.384 | -4.190 | -4.981 | 212108 | RLN3     | NM_173184_8_-_1  |
|               | Csnk1g1  | 3.936  | 4.166  | 4.185  | 4.064  | 4.518  | 4.605  | 4.086  | 4.418  | 4.454  | 4.726  | 214897 | CSNK1G1  | NM_173185_9_+_1  |
|               | Tbc1d24  | -3.677 | -2.840 | -1.310 | -0.086 | -1.427 | -3.053 | -2.739 | -0.917 | 1.045  | -0.883 | 224617 | TBC1D24  | NM_173186_17_-_1 |
| 2310035C23Rik |          | 4.849  | 5.012  | 5.304  | 5.070  | 4.770  | 4.536  | 4.647  | 5.005  | 5.273  | 5.018  | 227446 | KIAA1468 | NM_173187_1_+_1  |
|               | Mcp1     | 2.394  | 3.032  | 3.409  | 3.738  | 3.315  | 3.738  | 3.265  | 3.167  | 2.814  | 3.063  | 244329 | MCPH1    | NM_173189_8_+_1  |
|               | Prune    | 2.738  | 2.538  | 2.212  | 2.238  | 2.621  | 2.307  | 2.275  | 2.237  | 3.400  | 3.222  | 229589 | NA       | NM_173347_3_-_1  |
|               | Osbp19   | 4.509  | 5.252  | 5.355  | 6.027  | 4.354  | 4.888  | 5.258  | 5.837  | 6.684  | 7.198  | 100273 | OSBPL9   | NM_173350_4_-_1  |
|               | Eif5     | 8.494  | 8.608  | 8.328  | 8.399  | 8.314  | 8.463  | 8.391  | 8.507  | 8.296  | 8.327  | 217869 | EIF5     | NM_173363_12_+_1 |
|               | Zfp445   | 5.550  | 5.194  | 5.614  | 5.565  | 6.021  | 6.197  | 5.825  | 5.761  | 5.836  | 6.237  | 235682 | ZNF445   | NM_173364_9_-_1  |
|               | Gpr20    | -1.063 | -4.981 | -4.981 | -4.981 | -4.981 | -4.981 | -4.981 | -4.981 | -4.981 | -4.981 | 239530 | GPR20    | NM_173365_15_-_1 |
|               | Chd6     | 5.628  | 5.782  | 5.151  | 4.872  | 5.861  | 5.868  | 5.325  | 5.312  | 4.382  | 4.087  | 71389  | CHD6     | NM_173368_2_-_1  |
|               | Cyld     | 4.860  | 4.173  | 5.711  | 5.283  | 5.926  | 5.763  | 5.869  | 5.442  | 5.831  | 5.836  | 74256  | CYLD     | NM_173369_8_+_1  |

|                |          |        |        |        |        |        |        |        |        |        |        |        |          |                      |
|----------------|----------|--------|--------|--------|--------|--------|--------|--------|--------|--------|--------|--------|----------|----------------------|
|                | Cds1     | 5.426  | 5.566  | 2.350  | 1.156  | 1.427  | 0.678  | 2.883  | 3.010  | 4.273  | 4.057  | 74596  | CDS1     | NM_173370_5_+1       |
|                | H6pd     | 2.752  | 1.832  | 3.353  | 3.457  | 2.148  | 2.459  | 2.851  | 2.783  | 5.597  | 5.216  | 100198 | H6PD     | NM_173371_4_-1       |
|                | Grm6     | -4.981 | -2.895 | -4.913 | -3.937 | -4.985 | -4.645 | -1.207 | -1.909 | -4.981 | -4.981 | 108072 | GRM6     | NM_173372_11_+1      |
|                | Srsf1    | 5.501  | 5.535  | 6.137  | 6.274  | 6.110  | 5.830  | 5.903  | 5.558  | 5.471  | 6.177  | 110809 | SRSF1    | NM_173374_11_+1      |
|                | RbmX2    | 4.575  | 4.605  | 3.735  | 3.516  | 4.064  | 3.966  | 4.118  | 3.695  | 2.480  | 1.939  | 209003 | RBMX2    | NM_173376_X_+1       |
|                | Trp53bp2 | 2.525  | 2.605  | 3.806  | 3.798  | 3.707  | 3.808  | 3.609  | 3.585  | 4.549  | 4.445  | 209456 | TP53BP2  | NM_173378_1_+1       |
|                | P3h2     | -2.355 | -1.073 | 6.048  | 6.254  | -3.538 | -3.827 | -1.401 | 1.190  | -2.598 | -4.981 | 210530 | P3H2     | NM_173379_16_-1      |
| 6720489N17Rik  |          | 2.615  | 2.383  | 2.266  | 2.439  | 3.378  | 2.747  | 3.283  | 2.983  | 1.377  | 2.486  | 211378 | NA       | NM_173381_13_-1      |
|                | Proser1  | 3.981  | 3.916  | 4.082  | 3.811  | 4.012  | 3.956  | 3.887  | 3.869  | 3.936  | 4.112  | 212127 | PROSER1  | NM_173382_3_+1       |
|                | Dnd1     | 0.627  | 0.613  | 0.472  | 1.119  | 0.852  | 1.025  | 0.511  | 1.224  | 0.506  | 0.665  | 213236 | DND1     | NM_173383_18_-1      |
|                | Sox30    | -1.142 | -2.883 | -1.369 | -3.565 | -4.647 | -4.193 | -4.406 | -4.529 | -4.981 | -4.981 | 214105 | SOX30    | NM_173384_11_+1      |
|                | Mb21d1   | 0.710  | 0.999  | 4.405  | 4.261  | 3.977  | 3.224  | 4.328  | 3.596  | 4.139  | 3.580  | 214763 | MB21D1   | NM_173386_9_-1       |
|                | Zfp879   | -2.524 | -3.882 | -4.936 | -3.530 | -4.950 | -4.110 | -4.949 | -4.716 | -4.981 | -2.948 | 214779 | ZNF879   | NM_173387_11_-1      |
|                | Slc43a2  | 1.270  | 1.231  | -1.505 | 1.089  | 1.971  | 0.986  | 2.271  | 2.289  | 4.195  | 4.252  | 215113 | SLC43A2  | NM_173388_11_+1      |
|                | Nhsl1    | -4.765 | -4.679 | -4.962 | -1.047 | -1.175 | -2.276 | -3.164 | -4.647 | -4.981 | -4.944 | 215819 | NHSL1    | NM_173390_10_+1      |
|                | Zfyve16  | 4.502  | 4.860  | 4.589  | 4.532  | 4.323  | 4.315  | 4.353  | 4.249  | 4.019  | 4.501  | 218441 | ZFYVE16  | NM_173392_13_-1      |
|                | Xkr6     | -4.981 | -4.981 | -4.966 | -4.875 | -4.604 | -3.928 | -4.954 | -4.703 | -4.981 | -4.981 | 219149 | XKR6     | NM_173393_14_+1      |
|                | Ticam2   | 1.778  | 1.473  | 3.157  | 3.053  | 6.406  | 6.357  | 5.888  | 5.810  | 6.619  | 6.748  | 225471 | TICAM2   | NM_173394_18_-1      |
|                | Fam132b  | -0.212 | -1.005 | -0.829 | -0.694 | -0.635 | -1.560 | -1.161 | -2.537 | -1.266 | -1.701 | 227358 | ERFE     | NM_173395_1_+1       |
|                | Tgif2    | 2.844  | 2.122  | 2.244  | 1.612  | 4.035  | 3.865  | 3.158  | 2.206  | -0.209 | -0.685 | 228839 | TGIF2    | NM_173396_2_+1       |
|                | Fitm2    | 1.057  | 0.957  | 1.010  | 0.905  | 0.543  | 0.502  | 0.236  | 1.041  | 0.919  | 0.934  | 228859 | FITM2    | NM_173397_2_-1       |
|                | Gpr171   | 9.481  | 9.846  | 7.661  | 7.908  | 3.058  | 4.343  | 3.038  | 5.781  | 1.065  | 1.840  | 229323 | GPR171   | NM_173398_3_-1       |
|                | Zbtb5    | 2.951  | 2.174  | 1.884  | 1.613  | 2.729  | 2.412  | 2.611  | 2.399  | 3.815  | 3.338  | 230119 | ZBTB5    | NM_173399_4_-1       |
|                | Haus6    | 2.355  | 2.657  | 3.130  | 3.061  | 3.414  | 2.981  | 3.065  | 2.582  | 2.922  | 2.588  | 230376 | HAUS6    | NM_173400_4_-1       |
|                | Fbxo44   | -1.241 | -2.177 | -0.088 | -3.939 | -1.637 | -3.005 | -2.362 | -3.153 | -1.179 | -4.974 | 230903 | FBXO44   | NM_173401_4_-1       |
|                | Rgs12    | 1.537  | 1.233  | 3.582  | 2.487  | 5.297  | 5.189  | 3.706  | 3.231  | -0.317 | 1.690  | 71729  | RG12     | NM_173402_5_+1       |
|                | Amz1     | 1.590  | 1.981  | 5.226  | 5.570  | 5.909  | 6.268  | 6.105  | 5.939  | 5.532  | 5.785  | 231842 | AMZ1     | NM_173405_5_+1       |
|                | Jazf1    | 0.193  | 0.435  | 3.182  | 3.457  | 1.582  | 1.843  | 1.951  | 1.010  | 2.547  | 1.758  | 231986 | JAZF1    | NM_173406_6_-1       |
|                | Dcun1d3  | 0.798  | 0.836  | 0.307  | 0.326  | -0.625 | 0.054  | -1.708 | -0.422 | 0.913  | 2.027  | 233805 | DCUN1D3  | NM_173408_7_-1       |
|                | Rab8b    | 5.599  | 5.506  | 7.765  | 7.832  | 7.331  | 7.251  | 7.323  | 7.370  | 8.101  | 8.555  | 235442 | RAB8B    | NM_173413_9_-1       |
|                | Nyx      | -4.981 | -4.981 | -4.197 | -4.406 | -4.973 | -4.973 | -4.449 | -4.501 | -1.840 | -1.468 | 236690 | NYX      | NM_173415_X_+1       |
|                | BC068281 | -1.329 | -4.981 | -1.553 | -2.492 | -0.177 | 0.023  | -1.227 | -0.101 | 0.748  | 0.361  | 238037 | WDCP     | NM_173416_12_+1      |
|                | Dleu7    | -3.668 | -4.981 | -3.043 | -4.978 | -2.772 | -2.400 | -3.914 | -4.408 | -4.981 | -4.981 | 239133 | DLEU7    | NM_173419_14_-1      |
|                | Erich5   | -4.981 | -3.286 | -4.969 | -3.536 | -4.889 | -3.176 | -4.726 | -4.675 | -4.981 | -4.981 | 239368 | ERIC5    | NM_173421_15_+1      |
|                | Fem1c    | 4.735  | 4.987  | 5.745  | 5.715  | 6.931  | 6.902  | 6.260  | 6.036  | 6.123  | 5.786  | 240263 | FEM1C    | NM_173423_18_-1      |
|                | Zbtb37   | 2.826  | 3.135  | 2.833  | 2.706  | 2.786  | 2.940  | 2.029  | 1.840  | 1.338  | 1.596  | 240869 | ZBTB37   | NM_173424_1_-1       |
|                | Fam124b  | -0.345 | -1.744 | -2.881 | -2.704 | -2.882 | -3.967 | -4.252 | -2.660 | -4.981 | -4.981 | 241128 | FAM124B  | NM_173425_1_-1       |
|                | Fam110b  | 0.604  | 1.337  | -0.244 | 0.602  | -1.444 | -0.842 | -1.217 | 0.433  | 0.199  | 1.205  | 242297 | FAM110B  | NM_173426_4_+1       |
|                | Sspo     | -4.981 | -3.267 | 2.252  | 3.725  | 4.039  | 3.281  | 2.790  | 1.014  | -1.591 | -4.316 | 243369 | SSPO     | NM_173428_6_+1       |
|                | Zfp775   | 3.061  | 2.611  | 2.152  | 1.683  | 2.267  | 2.196  | 2.412  | 2.156  | 2.971  | 1.872  | 243372 | ZNF775   | NM_173429_6_+1       |
|                | Fkrp     | 3.535  | 3.838  | 4.321  | 4.302  | 3.789  | 3.829  | 3.844  | 3.858  | 4.387  | 3.982  | 243853 | FKRP     | NM_173430_7_-1       |
|                | Rpgrip1l | 1.476  | 1.536  | 0.386  | 0.841  | 0.726  | 0.605  | 0.698  | 0.756  | -0.277 | 0.701  | 244585 | RPGRIP1L | NM_173431_8_-1       |
|                | Pskh1    | 4.191  | 4.248  | 4.210  | 4.047  | 4.073  | 4.288  | 3.865  | 3.996  | 4.553  | 4.416  | 244631 | PSKH1    | NM_173432_8_+1       |
|                | Kdm4d    | -3.843 | -2.681 | -3.779 | -2.951 | -2.203 | -1.941 | -3.757 | -3.130 | -4.981 | -4.981 | 244694 | KDM4D    | NM_173433_9_-1       |
| 9930111J21Rik2 |          | 0.107  | 3.123  | 2.909  | 2.679  | 3.619  | 2.958  | 3.093  | 2.906  | 3.276  | 3.220  | 245240 | NA       | NM_173434_11_-1      |
|                |          | 2.979  | 2.034  | 3.161  | 3.273  | 3.283  | 2.680  | 2.537  | 2.560  | 3.081  | 3.006  | 245240 | NA       | NM_173434_dup1_11_-2 |
|                | Nav1     | 1.257  | -1.174 | 6.692  | 6.659  | 8.056  | 8.112  | 7.342  | 6.695  | 6.341  | 6.475  | 215690 | NAV1     | NM_173437_1_-1       |
|                | Fbxo45   | 3.066  | 3.372  | 4.462  | 4.575  | 4.934  | 4.303  | 4.376  | 3.791  | 4.080  | 4.295  | 268882 | FBXO45   | NM_173439_16_-1      |
|                | Nrip1    | 3.617  | 3.482  | 4.110  | 3.998  | 5.064  | 5.305  | 4.810  | 4.942  | 5.179  | 5.023  | 268903 | NRIP1    | NM_173440_16_-1      |
|                | Iws1     | 5.291  | 5.336  | 5.424  | 5.087  | 5.471  | 5.228  | 5.134  | 4.998  | 4.755  | 4.761  | 73473  | IWS1     | NM_173441_18_+1      |
|                | Gcnt1    | 1.899  | 1.907  | 3.993  | -1.335 | 5.539  | 2.145  | 4.887  | 2.064  | 4.976  | 4.322  | 14537  | GCNT1    | NM_173442_19_-1      |
|                | Vcpip1   | 5.443  | 5.346  | 5.814  | 5.775  | 5.581  | 5.640  | 5.812  | 5.754  | 6.270  | 6.477  | 70675  | VCPIP1   | NM_173443_1_-1       |
|                | Nbeal1   | 3.055  | 2.596  | 4.113  | 3.432  | 3.417  | 3.192  | 3.640  | 3.152  | 3.311  | 3.668  | 269198 | NBEAL1   | NM_173444_1_+1       |
|                | Rccd1    | 3.526  | 3.713  | 2.680  | 3.091  | 3.548  | 3.997  | 2.822  | 2.969  | 0.632  | 1.052  | 269955 | RCCD1    | NM_173445_7_-1       |
|                | Pp2d1    | -1.910 | -1.334 | -0.990 | -2.318 | -1.452 | -3.917 | -1.198 | -1.795 | -1.137 | -0.880 | 110332 | PP2D1    | NM_173449_17_-1      |
|                | Rpusd2   | 2.199  | 2.428  | 1.005  | 1.904  | 1.338  | 1.206  | 0.919  | 1.733  | 0.442  | 1.013  | 271842 | RPUSD2   | NM_173450_2_+1       |
|                | Tmem11   | 5.887  | 5.517  | 5.273  | 5.033  | 5.105  | 4.842  | 5.190  | 4.749  | 4.564  | 4.067  | 216821 | TMEM11   | NM_173453_11_-1      |
|                | Med8     | -1.037 | -1.432 | -0.748 | -2.294 | -1.689 | -4.316 | -2.718 | -4.003 | -0.442 | -3.335 | 80509  | MED8     | NM_173719_4_+1       |
|                | Hmgcll1  | 0.213  | 0.927  | -4.955 | -4.319 | -4.939 | -4.206 | -4.880 | -4.532 | -4.981 | -4.981 | 208982 | HMGCLL1  | NM_173731_9_+1       |
|                | Nemp1    | 0.473  | 1.043  | -0.180 | 0.431  | -0.158 | -0.623 | 0.483  | -0.480 | 0.611  | -0.865 | 210035 | NEMP1    | NM_173732_10_+1      |
|                | Suox     | 3.603  | 3.300  | 4.255  | 4.045  | 4.481  | 4.694  | 3.839  | 3.550  | 2.556  | 2.523  | 211389 | SUOX     | NM_173733_10_-1      |
|                | Tmem87a  | 2.624  | 4.767  | 3.022  | 4.710  | 2.004  | 4.220  | 2.520  | 4.695  | 1.915  | 4.745  | 211499 | TMEM87A  | NM_173734_2_-1       |
|                | Cipc     | 3.248  | 3.559  | 3.809  | 3.247  | 4.433  | 4.267  | 3.821  | 3.507  | 3.853  | 3.794  | 217732 | CIPC     | NM_173735_12_+1      |
|                | Hmces    | 3.665  | 4.241  | 3.843  | 3.896  | 2.805  | 2.997  | 3.078  | 3.694  | 2.355  | 2.360  | 232210 | HMCES    | NM_173737_6_+1       |
|                | Zfp940   | 1.024  | 0.250  | 0.281  | -0.562 | 1.288  | 0.879  | 0.688  | 0.176  | 1.111  | 0.565  | 233057 | NA       | NM_173738_7_-1       |
|                | Galnt18  | -4.981 | -4.981 | -4.960 | -4.552 | -4.934 | -2.693 | -4.943 | -4.784 | -4.981 | -2.909 | 233733 | GALNT18  | NM_173739_7_-1       |
|                | Maoa     | 1.799  | 3.073  | -0.136 | 1.763  | 0.410  | 0.625  | 0.170  | 1.579  | 0.014  | 2.548  | 17161  | MAOA     | NM_173740_X_+1       |
|                | Wdr24    | 4.073  | 3.923  | 4.171  | 4.123  | 4.141  | 4.124  | 3.954  | 4.147  | 4.355  | 4.241  | 268933 | WDR24    | NM_173741_17_+1      |
|                | Rnasek   | 8.678  | 9.001  | 7.563  | 7.750  | 7.420  | 7.946  | 7.775  | 7.958  | 7.229  | 7.288  | 52898  | RNASEK   | NM_173742_11_-1      |
|                | Apol9b   | -4.981 | -4.981 | -4.933 | -4.933 | -3.224 | -4.889 | -4.465 | -4.061 | -4.028 | -3.075 | 71898  | NA       | NM_173743_15_+1      |
|                | Tdrp     | -3.843 | -4.981 | -4.941 | -0.710 | -3.393 | -1.113 | -3.342 | 0.374  | -2.150 | -3.853 | 72148  | TDRP     | NM_173744_8_-1       |
|                | Dusp18   | 3.122  | 2.306  | 0.886  | 0.572  | 0.908  | -0.467 | -0.203 | -0.196 | 2.605  | 2.428  | 75219  | DUSP18   | NM_173745_11_+1      |
|                | Triqk    | 1.567  | 2.616  | 0.232  | 2.632  | 0.326  | 1.841  | -0.666 | -0.026 | -3.282 | -4.504 | 208820 | TRIQK    | NM_173746_4_+1       |
|                | Gpkow    | 4.350  | 5.004  | 5.109  | 5.248  | 4.815  | 5.116  | 5.189  | 5.276  | 5.932  | 6.239  | 209416 | GPKOW    | NM_173747_X_+1       |

|               |        |        |        |        |        |        |        |        |        |        |        |          |                 |
|---------------|--------|--------|--------|--------|--------|--------|--------|--------|--------|--------|--------|----------|-----------------|
| Nudcd3        | 5.943  | 6.042  | 5.272  | 5.650  | 5.605  | 5.995  | 5.552  | 5.880  | 5.713  | 6.018  | 209586 | NUDCD3   | NM_173748_11_-1 |
| Pamr1         | 0.582  | 0.149  | -4.958 | -4.532 | -3.622 | -3.687 | -3.795 | -3.063 | -4.981 | -4.981 | 210622 | PAMR1    | NM_173749_2_+1  |
| Arl14ep       | 1.017  | 2.526  | 0.822  | -0.023 | 0.352  | -0.543 | 0.913  | -1.686 | 1.112  | 2.112  | 212772 | ARL14EP  | NM_173750_2_-1  |
| Ilvbl         | 5.438  | 5.575  | 5.009  | 5.226  | 4.650  | 4.895  | 4.810  | 5.064  | 4.848  | 4.894  | 216136 | ILVBL    | NM_173751_10_+1 |
| Lgalsl        | 0.521  | 0.991  | 1.737  | 2.708  | 0.168  | 1.372  | 0.153  | 1.207  | 0.853  | 2.031  | 216551 | LGALS1   | NM_173752_11_-1 |
| Fnip1         | 4.837  | 4.878  | 4.467  | 4.160  | 4.765  | 4.909  | 4.724  | 4.133  | 4.372  | 4.915  | 216742 | FNIP1    | NM_173753_11_+1 |
| Usp43         | -4.981 | -4.981 | -4.984 | -4.244 | -4.981 | -4.981 | -4.972 | -4.833 | -4.981 | -4.981 | 216835 | USP43    | NM_173754_11_-1 |
| Ube2o         | 2.418  | 2.700  | 3.049  | 3.222  | 2.846  | 3.516  | 2.576  | 3.351  | 3.291  | 3.684  | 217342 | UBE2O    | NM_173755_11_-1 |
| Lin52         | 4.045  | 4.381  | 3.703  | 3.722  | 3.708  | 3.835  | 3.770  | 3.746  | 3.660  | 3.493  | 217708 | LIN52    | NM_173756_12_+1 |
| Mrps27        | 4.137  | 4.114  | 5.418  | 5.362  | 4.414  | 4.367  | 4.604  | 4.499  | 4.146  | 3.690  | 218506 | MRPS27   | NM_173757_13_+1 |
| Vwa8          | 0.160  | 1.428  | 2.253  | 2.662  | 1.742  | 1.642  | 1.853  | 1.557  | 2.707  | 2.281  | 219189 | VWA8     | NM_173758_14_+1 |
| Ppip5k2       | 4.107  | 4.423  | 5.057  | 4.913  | 4.546  | 4.737  | 4.747  | 5.003  | 5.435  | 5.879  | 227399 | PPIP5K2  | NM_173760_1_-1  |
| Ythdf1        | 5.434  | 5.326  | 5.760  | 5.581  | 5.757  | 5.509  | 5.870  | 5.820  | 6.570  | 6.402  | 228994 | YTHDF1   | NM_173761_2_-1  |
| Cenpe         | -0.032 | 0.976  | 3.921  | 3.812  | 4.726  | 4.315  | 4.050  | 3.056  | 1.748  | 1.286  | 229841 | CENPE    | NM_173762_3_+1  |
| Kyat3         | 1.595  | -0.382 | -0.516 | 1.880  | -1.605 | -0.150 | -0.072 | 0.314  | 0.777  | -0.777 | 229905 | KYAT3    | NM_173763_3_+1  |
| Tapt1         | 5.738  | 5.408  | 4.189  | 4.459  | 3.710  | 4.048  | 3.865  | 4.531  | 4.647  | 4.694  | 231225 | TAPT1    | NM_173764_5_-1  |
| Aasdh         | 3.348  | 3.580  | 3.055  | 3.258  | 3.282  | 3.436  | 2.660  | 2.999  | 2.290  | 2.609  | 231326 | AASDH    | NM_173765_5_-1  |
| Fam69c        | -4.981 | -4.981 | -4.981 | -4.981 | -4.281 | 2.024  | -4.927 | -4.343 | -4.981 | -4.981 | 240479 | FAM69C   | NM_173770_18_+1 |
| 4933406M09Rik | -4.981 | -4.981 | -3.742 | -4.350 | -4.981 | -4.981 | -4.059 | -2.862 | -2.177 | -0.317 | 240755 | NA       | NM_173771_1_+1  |
| Cfap100       | -3.843 | -3.315 | -4.449 | -4.980 | -4.688 | -4.829 | -4.967 | -4.871 | -4.190 | -3.882 | 243538 | CFAP100  | NM_173775_6_-1  |
| Mam12         | 3.051  | 3.398  | -1.624 | -0.591 | -1.198 | -1.222 | 0.612  | 0.742  | 1.288  | 1.441  | 270118 | NA       | NM_173776_9_+1  |
| Olfm2         | -1.451 | -1.113 | -3.411 | -3.336 | -2.741 | -3.563 | -3.414 | -2.900 | -1.844 | -3.233 | 244723 | OLFM2    | NM_173777_9_-1  |
| Sh2d7         | -1.128 | -0.446 | -4.092 | -4.736 | -3.770 | -4.345 | -2.349 | -3.532 | -2.090 | -2.588 | 244885 | SH2D7    | NM_173778_9_+1  |
| Sowahd        | -3.843 | -4.981 | -4.971 | -4.406 | -4.325 | -4.967 | -4.554 | -4.438 | -4.981 | -4.981 | 245381 | SOWAHD   | NM_173779_X_+1  |
| Klf8          | 1.476  | 1.804  | 2.690  | 2.458  | 2.310  | 1.856  | 2.035  | 1.268  | 1.424  | 2.542  | 245671 | KLF8     | NM_173780_X_+1  |
| Rab6b         | 4.694  | 4.176  | 1.734  | -1.924 | 2.626  | 0.454  | 1.768  | -1.649 | 1.068  | -2.993 | 270192 | RAB6B    | NM_173781_9_+1  |
| Ubtld2        | 1.598  | 1.643  | 4.150  | 4.092  | 1.403  | 1.348  | 1.699  | 1.618  | 1.838  | 2.342  | 327900 | UBTD2    | NM_173784_11_+1 |
| Iba57         | 2.700  | 2.300  | 2.348  | 2.593  | 2.032  | 2.004  | 1.913  | 1.842  | 2.904  | 2.847  | 216792 | IBA57    | NM_173785_11_-1 |
| Apol9a        | -4.981 | -4.981 | -4.834 | -4.973 | -4.968 | -4.968 | -4.911 | -4.866 | -4.981 | -4.981 | 223672 | NA       | NM_173786_15_-1 |
| Npr2          | 0.066  | 1.799  | -1.697 | -0.890 | -2.577 | -0.126 | -2.362 | -0.681 | -4.981 | -4.981 | 230103 | NPR2     | NM_173788_4_+1  |
| Fam83a        | -4.981 | -2.282 | -2.695 | -4.196 | -3.709 | -3.472 | -3.267 | -3.214 | -0.386 | -1.508 | 239463 | FAM83A   | NM_173862_15_+1 |
| Crtc3         | 4.092  | 3.130  | 3.317  | 2.545  | 4.900  | 4.246  | 4.618  | 3.659  | 4.332  | 3.592  | 70461  | CRTC3    | NM_173863_7_-1  |
| Slc41a1       | 2.599  | 2.917  | 4.074  | 4.119  | 4.621  | 4.607  | 4.108  | 4.251  | 4.500  | 4.376  | 98396  | SLC41A1  | NM_173865_1_+1  |
| Gpt2          | 0.262  | 0.234  | 2.213  | 2.488  | -0.103 | 0.640  | 1.040  | 1.701  | 1.780  | 2.493  | 108682 | GPT2     | NM_173866_8_+1  |
| Rcc2          | 6.500  | 6.449  | 6.374  | 6.370  | 6.682  | 6.647  | 6.824  | 6.700  | 6.543  | 6.184  | 108911 | RCC2     | NM_173867_4_+1  |
| St18          | -1.849 | -4.981 | -3.627 | -3.036 | -1.649 | -2.024 | -3.084 | -3.512 | -4.981 | -4.981 | 240690 | ST18     | NM_173868_1_+1  |
| Stfa2l1       | -4.981 | -4.981 | -0.714 | 0.583  | -4.746 | -1.393 | -2.595 | -0.334 | -2.093 | -2.982 | 268885 | NA       | NM_173869_16_+1 |
| Mgat4a        | 4.856  | 5.116  | 3.349  | 1.667  | 4.947  | 4.197  | 3.708  | 3.486  | -1.427 | 1.769  | 269181 | MGAT4A   | NM_173870_1_-1  |
| Cln3          | 3.522  | 4.264  | 4.125  | 3.992  | 4.053  | 4.204  | 3.794  | 2.982  | 1.895  | 3.659  | 12725  | CLCN3    | NM_173873_8_-1  |
| Cln3          | 4.029  | 3.221  | 3.237  | 3.314  | 2.677  | 2.756  | 1.957  | 2.985  | 3.121  | 2.453  | 12725  | CLCN3    | NM_173874_8_-1  |
| Cln3          | -2.387 | -0.459 | -1.342 | -0.145 | -4.009 | -2.124 | -3.169 | -2.077 | -0.336 | -4.261 | 12725  | CLCN3    | NM_173876_8_-1  |
| Glyctk        | -3.412 | -2.946 | -2.344 | -3.173 | -4.425 | -2.662 | -1.934 | -2.907 | -3.931 | -0.705 | 235582 | GLYCTK   | NM_174846_9_-1  |
| C2cd2         | 2.185  | 1.770  | 2.526  | 2.640  | 2.390  | 2.235  | 2.945  | 3.079  | 3.970  | 3.926  | 207781 | C2CD2    | NM_174847_16_-1 |
| Crybg3        | 3.821  | 3.838  | 3.552  | 3.161  | 3.311  | 2.931  | 3.776  | 3.440  | 4.311  | 4.411  | 224273 | CRYBG3   | NM_174848_16_-1 |
| Aagl5         | -4.981 | -4.981 | -2.642 | -3.626 | -1.412 | -2.222 | -3.641 | -3.248 | -2.607 | -3.684 | 231093 | AGBL5    | NM_174849_5_+1  |
| Micall2       | 0.332  | -1.097 | 1.749  | 1.273  | -1.492 | -1.163 | 1.037  | -0.276 | 1.636  | 0.693  | 231830 | MICALL2  | NM_174850_5_-1  |
| Ifnlr1        | -4.981 | -4.981 | 2.648  | 2.989  | -1.040 | -1.117 | 0.638  | 1.219  | 0.826  | -0.251 | 242700 | IFNLR1   | NM_174851_4_+1  |
| Phf12         | 4.496  | 4.537  | 4.768  | 4.485  | 5.394  | 5.388  | 4.975  | 4.538  | 4.569  | 4.453  | 268448 | PHF12    | NM_174852_11_+1 |
| Disc1         | 0.394  | 0.419  | -1.072 | -0.987 | 0.517  | -0.586 | 0.419  | -0.074 | 1.669  | 0.372  | 244667 | DISC1    | NM_174853_8_+1  |
| Disc1         | 1.498  | 0.846  | 2.623  | 1.763  | 2.430  | 1.747  | 1.751  | 0.967  | 0.850  | 1.040  | 244667 | DISC1    | NM_174854_8_+1  |
| Mamdc2        | -4.981 | -1.244 | -4.807 | -2.409 | -4.946 | -4.414 | -2.457 | 0.325  | -1.848 | -2.750 | 71738  | MAMDC2   | NM_174857_19_-1 |
| Klk15         | -3.189 | -4.981 | -4.981 | -4.981 | -4.981 | -4.981 | -4.981 | -4.981 | -4.981 | -4.981 | 317652 | KLK15    | NM_174865_7_+1  |
| Klk14         | -1.792 | -1.579 | -2.162 | -2.162 | -4.853 | -4.263 | -4.942 | -4.073 | -4.190 | -2.487 | 317653 | KLK14    | NM_174866_7_+1  |
| Miga1         | 2.005  | 0.801  | 2.427  | 2.033  | 0.028  | 2.268  | 0.982  | 1.740  | 0.703  | 1.235  | 215708 | MIGA1    | NM_174868_3_-1  |
| Slc26a1       | -1.818 | -4.981 | -3.762 | -0.536 | -1.503 | -0.320 | -1.353 | 0.414  | -1.473 | -0.591 | 231583 | SLC26A1  | NM_174870_5_-1  |
| Atg4b         | 5.057  | 5.104  | 4.931  | 5.154  | 4.970  | 5.165  | 4.929  | 5.281  | 5.032  | 5.125  | 66615  | ATG4B    | NM_174874_1_+1  |
| Atg4a         | 3.086  | 3.311  | 3.155  | 3.034  | 3.038  | 2.997  | 3.042  | 3.021  | 3.000  | 3.078  | 666468 | ATG4A    | NM_174875_3_-1  |
| Impg2         | -3.668 | -4.981 | -3.402 | -3.674 | -4.312 | -3.110 | -3.913 | -1.839 | -2.598 | -4.981 | 224224 | IMPG2    | NM_174876_16_+1 |
| Gimap9        | 4.747  | 5.463  | 0.051  | 1.047  | -0.155 | 3.045  | 0.904  | 3.015  | 0.014  | 0.905  | 317758 | NA       | NM_174960_6_+1  |
| Gpbar1        | -2.925 | -4.981 | -3.863 | -4.766 | -2.772 | -5.019 | -2.779 | -4.995 | -4.981 | -4.981 | 227289 | GPBAR1   | NM_174985_1_+1  |
| Coa6          | 5.260  | 5.398  | 4.393  | 4.443  | 4.424  | 4.511  | 4.553  | 4.154  | 3.569  | 3.588  | 67892  | NA       | NM_174987_8_+1  |
| Cdh22         | 2.818  | 1.339  | -3.840 | -1.446 | -0.884 | -1.160 | -2.716 | -1.392 | -2.370 | -2.562 | 104010 | CDH22    | NM_174988_2_-1  |
| Ticam1        | 2.798  | 2.241  | 4.056  | 3.861  | 3.173  | 3.030  | 3.689  | 3.561  | 3.954  | 3.963  | 106759 | TICAM1   | NM_174989_17_-1 |
| Gimap4        | 2.569  | 0.621  | -0.253 | 2.067  | 0.910  | 3.567  | 2.485  | 4.726  | 0.012  | 0.156  | 107526 | GIMAP4   | NM_174990_6_+1  |
| Adgrb1        | -4.981 | -4.981 | -4.981 | -4.981 | -4.975 | -4.888 | -4.973 | -4.735 | -4.981 | -4.981 | 107831 | ADGRB1   | NM_174991_15_+1 |
| Smagp         | -0.366 | -4.856 | 2.507  | 2.830  | 2.128  | 1.758  | 1.678  | 1.538  | 0.641  | 1.007  | 207818 | SMAGP    | NM_174992_15_-1 |
| Mgst2         | 5.693  | 5.839  | -0.819 | -0.245 | -0.796 | 0.608  | -0.430 | 2.252  | 1.755  | -0.558 | 211666 | MGST2    | NM_174995_3_+1  |
| Fam168b       | 5.955  | 6.031  | 6.199  | 6.313  | 6.231  | 6.340  | 6.412  | 6.026  | 6.282  | 6.185  | 214469 | FAM168B  | NM_174997_1_-1  |
| Hbq1a         | -2.483 | -2.349 | -4.892 | -2.340 | -3.727 | -3.072 | -4.483 | -4.559 | -4.394 | -3.094 | 216635 | NA       | NM_175000_11_+1 |
| Mrpl22        | 5.797  | 5.760  | 5.301  | 5.239  | 4.884  | 4.819  | 5.061  | 4.889  | 4.542  | 4.298  | 216767 | MRPL22   | NM_175001_11_+1 |
| Mmgt2         | 5.395  | 5.152  | 4.005  | 4.114  | 3.624  | 3.777  | 4.158  | 4.304  | 3.446  | 4.022  | 216829 | NA       | NM_175002_11_+1 |
| Arhgap44      | -3.863 | -3.075 | -4.115 | -4.699 | -4.899 | -4.893 | -4.560 | -4.808 | -3.668 | -4.636 | 216831 | ARHGAP44 | NM_175003_11_-1 |
| Pthr2         | 3.936  | 3.941  | 2.565  | 2.465  | 2.707  | 2.002  | 2.780  | 2.042  | 1.935  | 1.440  | 217057 | PTRH2    | NM_175004_11_+1 |
| Eny2          | 6.398  | 6.347  | 5.722  | 5.874  | 5.380  | 5.548  | 5.856  | 5.700  | 4.573  | 4.797  | 223527 | ENY2     | NM_175009_15_+1 |

|               |        |        |        |        |        |        |        |        |        |        |        |               |                 |
|---------------|--------|--------|--------|--------|--------|--------|--------|--------|--------|--------|--------|---------------|-----------------|
| Pgm5          | -4.981 | -4.981 | -4.980 | -4.602 | -4.944 | -1.407 | -4.973 | -3.378 | -4.981 | -4.981 | 226041 | PGM5          | NM_175013_19_-1 |
| Atp5g3        | 8.623  | 8.427  | 8.525  | 8.526  | 7.903  | 8.026  | 8.014  | 8.121  | 7.199  | 7.132  | 228033 | ATP5G3        | NM_175015_2_-1  |
| Alkbh2        | 4.062  | 3.970  | 2.730  | 2.634  | 2.650  | 2.565  | 2.425  | 2.274  | 1.208  | 1.237  | 231642 | ALKBH2        | NM_175016_5_-1  |
| Samd4b        | 3.363  | 3.124  | 4.021  | 3.707  | 4.099  | 3.817  | 3.990  | 4.149  | 4.925  | 4.854  | 233033 | SAMD4B        | NM_175021_7_-1  |
| Prr12         | 2.178  | 2.065  | 1.737  | 1.634  | 2.397  | 1.995  | 2.053  | 1.534  | 1.642  | 1.535  | 233210 | PRR12         | NM_175022_7_-1  |
| Rbbp6         | 5.797  | 6.005  | 3.589  | 3.229  | 3.694  | 3.416  | 3.189  | 3.285  | 2.650  | 3.044  | 19647  | RBBP6         | NM_175023_7_+1  |
| Nrn1l         | -4.021 | -3.630 | -4.421 | -4.712 | -4.054 | -4.636 | -4.480 | -4.675 | -4.981 | -4.131 | 234700 | NRN1L         | NM_175024_8_+1  |
| Atp2c1        | 4.778  | 4.777  | 6.030  | 5.497  | 4.993  | 4.634  | 5.432  | 5.668  | 6.917  | 7.402  | 235574 | ATP2C1        | NM_175025_9_-1  |
| Ifi209        | 7.054  | 6.402  | 7.395  | 6.471  | 7.393  | 5.797  | 7.633  | 6.507  | 8.675  | 7.091  | 236312 | IFI16         | NM_175026_1_+1  |
| Fancb         | -0.917 | -1.951 | -1.688 | -4.205 | -4.955 | -2.636 | -3.641 | -4.005 | -2.129 | -4.526 | 237211 | FANCB         | NM_175027_X_+1  |
| Adnp2         | 2.418  | 2.556  | 3.021  | 2.847  | 2.868  | 2.751  | 2.844  | 2.980  | 3.595  | 3.778  | 240442 | ADNP2         | NM_175028_18_-1 |
| Atg4c         | 0.343  | -0.547 | 1.519  | 1.012  | 1.999  | 0.946  | 2.630  | 1.709  | 3.446  | 3.067  | 242557 | ATG4C         | NM_175029_4_+1  |
| Tctex1d4      | -0.956 | 0.287  | -1.059 | -0.848 | -1.668 | -1.151 | -0.321 | -0.963 | 0.231  | -1.322 | 242646 | TCTEX1D4      | NM_175030_4_+1  |
| Stk36         | -0.900 | -3.267 | -1.587 | -4.375 | -3.602 | -2.633 | -3.401 | -3.489 | -2.009 | -2.993 | 269209 | STK36         | NM_175031_1_+1  |
| Slc24a5       | -4.981 | -2.172 | -2.602 | 0.339  | -2.242 | -1.018 | -1.337 | -0.656 | -1.907 | -0.942 | 317750 | SLC24A5       | NM_175034_2_+1  |
| Gimap5        | 3.994  | 3.481  | -1.064 | 0.176  | -1.428 | 0.686  | 0.979  | 2.572  | -2.936 | -2.746 | 317757 | GIMAP1-GIMAP5 | NM_175035_6_+1  |
| Leprot        | 7.594  | 7.747  | 8.107  | 8.108  | 7.227  | 7.828  | 7.542  | 7.744  | 7.317  | 7.309  | 230514 | LEPROT        | NM_175036_4_+1  |
| Bcor          | -3.326 | -0.629 | -1.472 | -3.069 | -0.712 | -4.692 | -4.523 | -4.730 | -3.992 | -4.106 | 71458  | BCOR          | NM_175044_X_-1  |
| Bcor          | -0.651 | -3.628 | -1.625 | -0.157 | -0.013 | -3.203 | 0.760  | -0.326 | 0.556  | -1.212 | 71458  | BCOR          | NM_175045_X_-1  |
| Bcor          | -3.708 | -3.818 | -3.197 | -4.791 | -4.650 | -4.941 | -4.462 | -3.349 | -4.401 | -4.568 | 71458  | BCOR          | NM_175046_X_-1  |
| Gimap4        | -0.396 | -4.981 | -3.743 | -2.821 | -2.420 | -1.938 | -0.418 | 0.268  | -3.174 | -4.925 | 107526 | GIMAP4        | NM_175048_6_+1  |
| Hmgn3         | 6.496  | 5.937  | 4.893  | 4.870  | 4.500  | 4.263  | 3.553  | 3.008  | 0.578  | 0.982  | 94353  | NA            | NM_175074_9_-1  |
| Mdfic         | 3.126  | 3.351  | 4.881  | 4.553  | 4.506  | 4.335  | 4.297  | 4.152  | 3.820  | 4.103  | 16543  | MDFIC         | NM_175088_6_+1  |
| Nek1          | 3.716  | 3.878  | 1.826  | 2.724  | 1.954  | 2.832  | 1.530  | 2.627  | -0.685 | 2.967  | 18004  | NEK1          | NM_175089_8_+1  |
| Slc31a1       | 5.482  | 5.693  | 5.955  | 5.911  | 5.147  | 5.208  | 5.552  | 5.975  | 6.225  | 6.658  | 20529  | SLC31A1       | NM_175090_4_+1  |
| Tnks          | 2.721  | 3.143  | 4.165  | 4.150  | 3.596  | 4.211  | 3.556  | 3.993  | 4.871  | 4.860  | 21951  | TNKS          | NM_175091_8_-1  |
| Rhof          | 4.071  | 4.364  | 4.093  | 4.631  | 5.742  | 5.858  | 5.003  | 4.965  | 3.768  | 2.581  | 23912  | RHOF          | NM_175092_5_-1  |
| Trib3         | -4.981 | -1.980 | -3.597 | 0.232  | -3.001 | 0.195  | -1.577 | 0.618  | -0.036 | 1.785  | 228775 | TRIB3         | NM_175093_2_-1  |
| Pdhx          | 4.969  | 5.059  | 4.678  | 4.938  | 4.993  | 5.159  | 4.867  | 4.893  | 4.477  | 4.654  | 27402  | PDHX          | NM_175094_2_-1  |
| Commd2        | 6.723  | 6.743  | 5.716  | 5.576  | 5.596  | 5.615  | 5.537  | 5.553  | 5.054  | 5.234  | 52245  | COMMD2        | NM_175095_3_-1  |
| Stbd1         | -1.431 | -1.991 | 4.794  | 4.888  | 0.202  | -0.970 | 2.240  | 3.035  | 1.896  | 2.834  | 52331  | STBD1         | NM_175096_5_+1  |
| Ccdc126       | 3.466  | 3.790  | 1.339  | 2.137  | 1.294  | 2.206  | 1.266  | 2.130  | 2.215  | 3.396  | 57895  | CCDC126       | NM_175098_6_+1  |
| Repin1        | -1.765 | -1.143 | -1.365 | -0.675 | -1.159 | -0.482 | -0.075 | -0.234 | 0.889  | 0.785  | 58887  | REPIN1        | NM_175099_6_+1  |
| Emc3          | 7.612  | 7.589  | 6.103  | 6.275  | 6.153  | 6.202  | 6.147  | 6.441  | 6.462  | 6.411  | 66087  | EMC3          | NM_175101_6_-1  |
| Sf3b5         | 7.190  | 7.201  | 6.510  | 6.366  | 6.474  | 6.593  | 6.745  | 6.567  | 6.149  | 5.594  | 66125  | SF3B5         | NM_175102_10_+1 |
| Bola2         | 4.693  | 4.561  | 5.285  | 5.348  | 4.933  | 4.911  | 5.542  | 5.429  | 4.773  | 4.445  | 66162  | NA            | NM_175103_7_+1  |
| Fam53c        | 3.857  | 3.721  | 3.955  | 3.842  | 4.142  | 4.140  | 4.494  | 4.391  | 5.827  | 5.495  | 66306  | FAM53C        | NM_175104_18_+1 |
| Aqp11         | -2.355 | -4.981 | -1.567 | -3.227 | -1.741 | -2.254 | -2.891 | -0.457 | -1.008 | -3.758 | 66333  | AQP11         | NM_175105_7_-1  |
| Tmem177       | 3.159  | 2.600  | 2.417  | 2.453  | 2.784  | 2.491  | 1.724  | 2.350  | 1.834  | 1.665  | 66343  | TMEM177       | NM_175106_1_-1  |
| 2310022A10Rik | 2.887  | 2.640  | 1.718  | 1.887  | 3.030  | 2.637  | 2.664  | 2.729  | 5.313  | 4.535  | 66367  | C19orf47      | NM_175107_7_+1  |
| Rps19bp1      | 5.105  | 5.278  | 4.443  | 4.304  | 4.122  | 4.144  | 4.489  | 4.361  | 3.526  | 3.364  | 66538  | RPS19BP1      | NM_175109_15_-1 |
| Hspbap1       | 4.336  | 4.201  | 2.843  | 2.538  | 3.449  | 3.530  | 3.533  | 2.951  | 3.924  | 3.459  | 66667  | HSPBAP1       | NM_175111_16_+1 |
| Rae1          | 6.669  | 6.824  | 6.370  | 6.545  | 6.308  | 6.410  | 6.018  | 6.279  | 6.116  | 5.867  | 66679  | RAE1          | NM_175112_2_+1  |
| Trmt6         | 5.369  | 5.229  | 4.712  | 4.998  | 5.058  | 5.124  | 4.896  | 4.601  | 4.437  | 4.240  | 66926  | TRMT6         | NM_175113_2_-1  |
| Trak1         | 3.510  | 3.582  | 3.574  | 2.971  | 3.769  | 3.522  | 3.833  | 3.542  | 4.661  | 4.620  | 67095  | TRAK1         | NM_175114_9_+1  |
| Ikzf5         | 4.144  | 3.913  | 4.054  | 3.986  | 4.028  | 4.061  | 4.076  | 3.988  | 4.565  | 4.951  | 67143  | IKZF5         | NM_175115_7_-1  |
| Lpar6         | 5.195  | 6.454  | 7.508  | 7.901  | 5.101  | 6.106  | 6.373  | 7.450  | 7.245  | 8.156  | 67168  | LPAR6         | NM_175116_14_+1 |
| Dusp28        | 5.101  | 4.957  | 2.883  | 2.303  | 2.661  | 1.985  | 3.007  | 2.044  | 2.740  | 2.328  | 67446  | DUSP28        | NM_175118_1_+1  |
| Slc38a2       | 5.975  | 6.123  | 6.882  | 6.785  | 8.105  | 8.020  | 8.251  | 7.861  | 7.131  | 7.519  | 67760  | SLC38A2       | NM_175121_15_-1 |
| Rab39b        | -1.938 | -0.369 | -1.389 | -1.514 | -0.810 | -1.270 | -2.540 | -1.385 | -2.605 | -4.981 | 67790  | RAB39B        | NM_175122_X_-1  |
| 1110051M20Rik | 4.140  | 4.269  | 2.004  | 1.888  | 3.644  | 3.570  | 2.795  | 2.420  | 1.959  | 1.280  | 228356 | C11orf49      | NM_175123_2_-1  |
| Lrrc28        | 1.130  | 3.177  | 2.119  | 1.543  | 1.819  | 1.401  | 0.961  | 1.711  | 1.689  | 1.984  | 67867  | LRRC28        | NM_175124_7_-1  |
| Zcchc3        | 3.056  | 1.586  | 1.884  | 1.561  | 2.769  | 2.481  | 2.050  | 1.388  | 0.883  | -0.684 | 67917  | ZCCHC3        | NM_175126_2_-1  |
| Fbxo28        | 4.305  | 4.957  | 4.835  | 4.928  | 4.846  | 4.974  | 5.066  | 5.144  | 5.921  | 6.026  | 67948  | FBXO28        | NM_175127_1_-1  |
| 4930430F08Rik | 2.575  | 3.538  | 1.829  | 3.805  | 1.971  | 2.558  | 2.471  | 2.351  | 2.009  | 2.402  | 68281  | C12orf29      | NM_175128_10_-1 |
| Trpm4         | 0.055  | -0.282 | 0.290  | 0.765  | 0.814  | 0.343  | 1.286  | 1.695  | 2.471  | 2.554  | 68667  | TRPM4         | NM_175130_7_-1  |
| Synpo2l       | -3.612 | -3.516 | -2.213 | -3.620 | -4.803 | -4.909 | -4.511 | -4.740 | -2.281 | -3.798 | 68760  | SYNPO2L       | NM_175132_14_-1 |
| Gucd1         | 3.605  | 3.126  | 4.877  | 5.045  | 5.493  | 5.483  | 5.697  | 5.691  | 6.496  | 6.613  | 68778  | GUCD1         | NM_175133_10_-1 |
| Ankrd46       | 4.609  | 5.015  | 4.426  | 4.604  | 4.166  | 4.422  | 4.155  | 4.617  | 4.722  | 4.694  | 68839  | ANKRD46       | NM_175134_15_-1 |
| Eif2b3        | 0.893  | 0.900  | 0.858  | 0.100  | 0.867  | 0.669  | 0.585  | 0.112  | -0.701 | -0.071 | 108067 | EIF2B3        | NM_175135_4_+1  |
| Rnf122        | 7.577  | 8.195  | 4.273  | 4.198  | 4.471  | 5.151  | 3.973  | 4.613  | 1.727  | 2.844  | 68867  | RNF122        | NM_175136_8_+1  |
| Vars2         | 2.659  | 2.714  | 2.438  | 2.582  | 3.062  | 2.868  | 2.776  | 2.726  | 3.195  | 2.884  | 68915  | VARS2         | NM_175137_17_-1 |
| 1810030O07Rik | 5.898  | 6.027  | 5.862  | 5.904  | 5.712  | 5.746  | 5.775  | 5.967  | 5.949  | 6.167  | 69155  | CXorf38       | NM_175141_X_-1  |
| Zfp428        | 0.460  | 1.280  | -1.494 | -1.262 | -0.699 | -0.496 | -1.458 | -1.259 | -1.855 | -2.013 | 232969 | ZNF428        | NM_175142_7_+1  |
| Qrich1        | 4.936  | 5.383  | 5.468  | 5.434  | 5.765  | 5.509  | 5.287  | 5.575  | 6.074  | 6.139  | 69232  | QRICH1        | NM_175143_9_+1  |
| Tmem127       | 4.624  | 4.536  | 5.466  | 5.416  | 5.604  | 5.656  | 5.635  | 5.464  | 6.288  | 6.289  | 69470  | TMEM127       | NM_175145_2_+1  |
| Tsr2          | 4.765  | 4.722  | 3.807  | 3.952  | 3.794  | 3.925  | 3.426  | 3.458  | 2.289  | 2.474  | 69499  | TSR2          | NM_175146_X_-1  |
| 2310022B05Rik | 4.165  | 4.457  | 2.334  | 2.845  | 1.538  | 3.359  | 1.948  | 2.483  | 3.004  | 3.277  | 69551  | C1orf198      | NM_175149_8_-1  |
| Txndc15       | 6.751  | 6.943  | 8.317  | 8.302  | 5.557  | 5.912  | 5.824  | 6.366  | 5.668  | 5.897  | 69672  | TXNDC15       | NM_175150_13_+1 |
| Tatdn1        | 3.839  | 4.075  | 3.159  | 3.216  | 2.770  | 3.055  | 2.887  | 2.758  | 2.195  | 2.250  | 69694  | TATDN1        | NM_175151_15_-1 |
| Thap3         | 4.313  | 4.667  | 3.639  | 3.732  | 3.858  | 3.756  | 3.859  | 3.577  | 3.190  | 3.367  | 69876  | THAP3         | NM_175152_4_-1  |
| Vwa9          | 0.181  | -0.242 | 2.828  | 1.788  | 0.593  | 1.385  | 1.745  | 2.101  | 2.285  | 1.819  | 69882  | VWA9          | NM_175153_9_+1  |
| Galk2         | -0.342 | 0.682  | -1.409 | -0.679 | -1.150 | -1.318 | -2.813 | -2.228 | -0.907 | -4.907 | 69976  | GALK2         | NM_175154_2_+1  |
| Sash1         | -1.278 | -1.402 | 2.233  | 2.278  | 4.703  | 6.028  | 3.482  | 3.293  | 1.700  | 1.740  | 70097  | SASH1         | NM_175155_10_-1 |

|               |        |        |        |        |        |        |        |        |        |        |        |          |                 |
|---------------|--------|--------|--------|--------|--------|--------|--------|--------|--------|--------|--------|----------|-----------------|
| Utp20         | 2.544  | 2.339  | 3.226  | 3.132  | 3.373  | 3.056  | 3.098  | 3.469  | 3.245  | 3.701  | 70683  | UTP20    | NM_175158_10_-1 |
| Zdhhc1        | 1.867  | 2.685  | 1.707  | 1.257  | 0.477  | 1.520  | 1.342  | 1.871  | 2.290  | 2.400  | 70796  | ZDHHC1   | NM_175160_8_-1  |
| Stox2         | 4.722  | 5.271  | -0.089 | 0.054  | -4.376 | -3.818 | -0.102 | 0.639  | 3.256  | 3.351  | 71069  | STOX2    | NM_175162_8_-1  |
| Zfp689        | 2.267  | 2.403  | 2.044  | 1.813  | 2.333  | 2.071  | 2.051  | 1.850  | 2.356  | 1.393  | 71131  | ZNF689   | NM_175163_7_-1  |
| Arhgap26      | 2.407  | 1.400  | 5.369  | 5.108  | 5.291  | 5.112  | 5.623  | 5.773  | 7.544  | 7.595  | 71302  | ARHGAP26 | NM_175164_18_+1 |
| Ptk7          | -4.981 | -4.981 | -4.137 | -3.962 | -3.375 | -4.865 | -3.804 | -3.938 | -4.981 | -4.981 | 71461  | PTK7     | NM_175168_17_-1 |
| Pogk          | -3.900 | -3.480 | 1.608  | 1.507  | 0.391  | 0.243  | 2.363  | 1.070  | 2.383  | 1.466  | 71592  | POGK     | NM_175170_1_-1  |
| Mast4         | 4.116  | 4.467  | 4.254  | 4.306  | 3.418  | 3.995  | 2.118  | 2.754  | 1.138  | 1.373  | 328329 | MAST4    | NM_175171_13_-1 |
| Shtn1         | 0.199  | 1.493  | 2.996  | 0.405  | 2.495  | 0.101  | 1.277  | 0.334  | -1.552 | -3.977 | 71653  | SHTN1    | NM_175172_19_-1 |
| Klh5          | 4.528  | 4.305  | 6.135  | 5.891  | 6.123  | 5.935  | 6.376  | 5.950  | 6.463  | 6.603  | 71778  | KLHL5    | NM_175174_5_+1  |
| Plekfh2       | 5.784  | 5.733  | 6.496  | 6.337  | 5.918  | 5.745  | 6.310  | 6.770  | 7.794  | 7.966  | 71801  | PLEKHF2  | NM_175175_4_-1  |
| Bdh1          | -3.848 | -4.166 | -4.517 | -4.787 | -3.432 | -4.911 | -4.719 | -4.838 | -4.968 | -4.479 | 71911  | BDH1     | NM_175177_16_+1 |
| Amer1         | 1.913  | 1.679  | 2.573  | 2.450  | 2.388  | 2.406  | 2.460  | 2.660  | 2.935  | 3.190  | 72345  | AMER1    | NM_175179_X_-1  |
| Wdr44         | 3.310  | 4.032  | 4.683  | 4.378  | 4.616  | 4.611  | 3.939  | 4.235  | 4.319  | 4.606  | 72404  | WDR44    | NM_175180_X_+1  |
| Prr5l         | 2.719  | 0.473  | 5.348  | 4.933  | 4.182  | 3.607  | 5.457  | 4.565  | 5.628  | 4.870  | 72446  | PRR5L    | NM_175181_2_-1  |
| Atxn7l2       | -0.219 | -0.986 | -2.372 | -2.455 | -1.228 | -1.520 | -1.469 | -3.794 | -1.255 | -0.115 | 72522  | ATXN7L2  | NM_175183_3_-1  |
| Mvb12b        | 2.420  | 1.998  | 2.839  | 1.899  | 2.641  | 0.799  | 2.448  | 1.005  | 1.668  | -0.289 | 72543  | MVB12B   | NM_175184_2_-1  |
| Hsdl1         | 5.576  | 5.581  | 5.274  | 5.174  | 5.646  | 5.679  | 5.482  | 5.589  | 6.098  | 5.967  | 72552  | HSDL1    | NM_175185_8_-1  |
| Tmem161b      | 3.580  | 3.633  | 4.379  | 4.050  | 3.281  | 3.250  | 3.350  | 3.283  | 3.465  | 3.546  | 72745  | TMEM161B | NM_175187_13_+1 |
| March1        | 3.117  | 3.187  | 5.354  | 5.534  | 4.237  | 4.875  | 4.488  | 4.673  | 4.954  | 5.195  | 72925  | MARCH1   | NM_175188_8_+1  |
| Swi5          | 8.211  | 8.029  | 7.516  | 7.419  | 7.278  | 7.351  | 7.027  | 6.977  | 5.855  | 5.681  | 72931  | SWI5     | NM_175190_2_-1  |
| Gpr22         | -0.215 | -0.688 | -0.250 | -0.725 | -0.537 | -0.652 | -0.587 | -1.120 | 0.141  | 0.239  | 73010  | GPR22    | NM_175191_12_-1 |
| Golim4        | 4.670  | 4.865  | 5.392  | 5.224  | 4.355  | 4.982  | 4.076  | 4.504  | 4.498  | 4.795  | 73124  | GOLIM4   | NM_175193_3_-1  |
| Slc25a16      | 3.797  | 4.082  | 4.096  | 3.793  | 4.096  | 3.967  | 4.129  | 3.963  | 5.231  | 5.055  | 73132  | SLC25A16 | NM_175194_10_+1 |
| Sspl2b        | 4.171  | 4.278  | 3.908  | 4.064  | 4.075  | 4.317  | 3.911  | 4.338  | 5.018  | 4.845  | 73218  | SPPL2B   | NM_175195_10_+1 |
| Prox2         | 0.491  | 1.156  | -1.142 | -2.518 | -0.639 | -0.686 | -2.137 | -1.044 | 0.799  | -0.036 | 73422  | PROX2    | NM_175198_12_-1 |
| Hspa12a       | -2.739 | -1.716 | -4.359 | -4.804 | -3.185 | -1.063 | -4.619 | -0.637 | -4.981 | 1.778  | 73442  | HSPA12A  | NM_175199_19_-1 |
| Rnf38         | 3.565  | 2.307  | 2.247  | 1.736  | 2.872  | 2.632  | 1.699  | 2.395  | 3.239  | 4.597  | 73469  | RNF38    | NM_175201_4_-1  |
| Psmb11        | -4.981 | -3.211 | -2.263 | -3.914 | -3.043 | -4.198 | -2.875 | -4.624 | -2.925 | -3.601 | 73902  | PSMB11   | NM_175204_14_+1 |
| Fbxl22        | 1.551  | 1.769  | 1.141  | 0.028  | 1.048  | 1.195  | 1.265  | -0.154 | 1.107  | 1.359  | 74165  | NA       | NM_175206_9_-1  |
| Ankrd9        | 4.462  | 5.076  | 1.479  | 1.415  | 1.944  | 1.969  | 1.665  | 1.424  | 1.818  | 1.777  | 74251  | ANKRD9   | NM_175207_12_-1 |
| Ralgps1       | 1.558  | 2.063  | -2.268 | -2.523 | -0.079 | -1.670 | -2.606 | -1.830 | -4.023 | 0.449  | 241308 | RALGPS1  | NM_175211_2_-1  |
| Tmem65        | 3.637  | 3.946  | 3.429  | 3.730  | 2.944  | 2.422  | 3.661  | 4.010  | 5.430  | 5.725  | 74868  | TMEM65   | NM_175212_15_-1 |
| Mei4          | 2.634  | 0.909  | -2.301 | -3.816 | -2.395 | -3.367 | -3.307 | -4.939 | -3.925 | -3.816 | 75033  | MEI4     | NM_175213_9_+1  |
| Lysmd4        | 1.995  | 1.670  | 1.686  | 1.293  | 1.581  | 1.696  | 1.321  | 1.210  | 1.974  | 1.506  | 75099  | LYSMD4   | NM_175215_7_+1  |
| C130026I21Rik | 1.548  | 4.442  | -0.441 | 3.483  | 0.270  | 2.768  | -0.979 | 2.657  | 0.090  | 3.465  | 620078 | NA       | NM_175219_1_-1  |
| Dnali1        | -3.668 | -2.340 | -3.732 | -2.538 | -1.511 | -0.851 | -2.210 | -3.138 | -2.839 | -4.342 | 75563  | DNALI1   | NM_175223_4_-1  |
| Metap1        | 5.232  | 5.390  | 5.471  | 5.627  | 4.865  | 4.918  | 4.754  | 4.827  | 4.350  | 4.447  | 75624  | METAP1   | NM_175224_3_-1  |
| Tasp1         | 0.927  | 0.347  | 0.613  | 0.499  | 0.272  | -0.565 | 0.520  | -0.658 | -0.551 | -1.124 | 75812  | TASP1    | NM_175225_2_-1  |
| Rnf139        | 6.195  | 6.161  | 6.061  | 6.002  | 5.332  | 5.515  | 5.676  | 5.785  | 6.006  | 6.197  | 75841  | RNF139   | NM_175226_15_+1 |
| Srrm2         | 7.613  | 7.723  | 8.611  | 8.457  | 9.016  | 9.100  | 8.408  | 8.389  | 7.829  | 7.830  | 75956  | NA       | NM_175229_17_+1 |
| Whsc1         | 1.495  | 1.274  | 1.728  | 0.281  | 2.532  | 1.714  | 2.233  | 1.565  | 2.029  | 0.338  | 107823 | WHSC1    | NM_175231_5_+1  |
| Faxc          | -4.981 | -0.465 | -4.981 | -4.981 | -4.981 | -4.981 | -4.971 | -4.804 | -4.981 | -4.981 | 76132  | FAXC     | NM_175234_4_+1  |
| Adhfe1        | -3.291 | -4.981 | -1.857 | -4.950 | -1.882 | -4.659 | -1.893 | -4.556 | -3.516 | -4.519 | 76187  | ADHFE1   | NM_175236_1_+1  |
| Rif1          | 4.894  | 4.704  | 5.517  | 5.387  | 5.774  | 5.604  | 5.358  | 5.196  | 4.402  | 4.593  | 51869  | RIF1     | NM_175238_2_+1  |
| Fam187b       | -4.981 | -4.981 | -4.981 | -4.981 | -4.981 | -4.981 | -4.948 | -4.965 | -4.981 | -4.981 | 76415  | NA       | NM_175240_7_+1  |
| 1700028K03Rik | -0.080 | -0.440 | -1.396 | -1.837 | -1.811 | -1.368 | -2.088 | -2.162 | -2.880 | -2.199 | 76421  | C1orf146 | NM_175241_5_+1  |
| Ppp1r18       | 1.228  | -0.178 | 2.392  | 2.709  | 4.254  | 4.179  | 4.254  | 4.178  | 4.500  | 4.930  | 76448  | PPP1R18  | NM_175242_17_+1 |
| Hectd3        | 4.220  | 4.237  | 4.344  | 4.457  | 4.741  | 4.817  | 4.546  | 4.978  | 5.721  | 5.896  | 76608  | HECTD3   | NM_175244_4_+1  |
| Mzt1          | 5.955  | 6.241  | 5.958  | 5.865  | 5.551  | 5.591  | 5.459  | 5.611  | 4.782  | 5.382  | 76789  | MZT1     | NM_175245_14_-1 |
| Snip1         | 4.738  | 4.454  | 4.889  | 4.797  | 4.733  | 4.471  | 4.325  | 4.200  | 4.582  | 4.225  | 76793  | SNIP1    | NM_175246_4_+1  |
| Zfp28         | 3.418  | 3.541  | 1.558  | 1.740  | 1.844  | 2.014  | 1.925  | 1.996  | 1.700  | 2.073  | 22690  | ZFP28    | NM_175247_7_+1  |
| Arid2         | 4.562  | 4.562  | 5.765  | 5.933  | 5.016  | 4.889  | 5.230  | 5.175  | 5.403  | 5.501  | 77044  | ARID2    | NM_175251_15_+1 |
| Zfp934        | -1.558 | -2.327 | -2.590 | -3.883 | -4.857 | -4.188 | -2.957 | -4.241 | -1.809 | -3.789 | 77117  | NA       | NM_175252_13_-1 |
| Sec24a        | 2.908  | 2.402  | 2.711  | 2.924  | 2.365  | 2.122  | 2.396  | 2.933  | 2.783  | 2.827  | 77371  | SEC24A   | NM_175255_11_-1 |
| Heg1          | 2.841  | 2.620  | 3.306  | 3.494  | 0.874  | 1.899  | 2.417  | 3.233  | 3.024  | 3.557  | 77446  | HEG1     | NM_175256_16_+1 |
| Rapgef6       | 5.036  | 4.360  | 5.833  | 5.366  | 5.672  | 5.230  | 5.359  | 5.150  | 5.803  | 5.927  | 192786 | RAPGEF6  | NM_175258_11_+1 |
| Shisa4        | -3.563 | -4.981 | -4.981 | -4.981 | -4.981 | -4.981 | -4.171 | -4.233 | -4.981 | -4.981 | 77552  | SHISA4   | NM_175259_1_-1  |
| Myh10         | 2.500  | 2.324  | 0.125  | 1.101  | -0.131 | 0.888  | -0.733 | 0.883  | 0.136  | 0.413  | 77579  | MYH10    | NM_175260_11_+1 |
| Notum         | -4.981 | -4.981 | -2.934 | -1.388 | -4.895 | -4.976 | -4.816 | -4.975 | -4.981 | -4.981 | 77583  | NOTUM    | NM_175263_11_-1 |
| Bora          | 1.655  | 1.319  | 2.100  | 2.541  | 2.730  | 2.916  | 2.323  | 2.497  | 1.737  | 2.040  | 77744  | BORA     | NM_175265_14_+1 |
| Epm2aip1      | 4.498  | 5.167  | 4.236  | 4.560  | 4.113  | 4.698  | 3.789  | 4.444  | 3.923  | 4.885  | 77781  | EPM2AIP1 | NM_175266_9_+1  |
| Fam53b        | 3.538  | 2.462  | 3.479  | 3.813  | 3.956  | 4.223  | 3.404  | 4.019  | 5.109  | 4.796  | 77938  | FAM53B   | NM_175268_7_-1  |
| Lpar4         | -4.981 | -4.981 | -4.930 | -4.930 | -4.092 | -4.360 | -1.615 | -2.866 | -3.043 | -0.789 | 78134  | LPAR4    | NM_175271_X_+1  |
| Nav2          | 3.003  | 1.441  | 0.240  | -1.082 | 0.774  | 0.596  | -1.825 | -0.114 | -3.734 | 0.704  | 78286  | NAV2     | NM_175272_7_+1  |
| Fam219b       | 1.199  | 2.681  | 2.261  | 2.555  | 2.317  | 0.983  | 2.301  | 1.718  | 2.877  | 1.802  | 78323  | FAM219B  | NM_175273_9_+1  |
| Ttyh3         | 3.405  | 2.771  | 4.887  | 4.963  | 5.974  | 5.777  | 5.235  | 4.888  | 5.122  | 5.336  | 78339  | TTYH3    | NM_175274_5_-1  |
| Cntln         | 2.357  | 2.384  | 3.419  | 3.076  | 4.147  | 3.853  | 3.676  | 3.440  | 2.213  | 2.498  | 338349 | CNTLN    | NM_175275_4_+1  |
| Bola3         | 5.801  | 5.774  | 4.548  | 4.870  | 5.303  | 5.552  | 5.173  | 4.951  | 2.734  | 2.552  | 78653  | BOLA3    | NM_175277_6_+1  |
| Srd5a1        | 0.000  | -0.395 | -0.436 | -1.992 | -0.823 | -1.711 | -0.788 | -0.238 | 0.671  | -0.027 | 78925  | SRD5A1   | NM_175283_13_-1 |
| Fzd10         | -4.981 | -1.739 | -4.952 | -4.952 | -4.320 | -4.309 | -4.970 | -4.976 | -2.333 | -1.419 | 93897  | FZD10    | NM_175284_5_+1  |
| Tmem62        | 3.009  | 2.960  | 2.726  | 2.966  | 2.309  | 2.394  | 2.462  | 2.583  | 2.821  | 2.897  | 96957  | TMEM62   | NM_175285_2_+1  |
| Tprn          | 2.903  | 2.953  | 3.816  | 3.817  | 3.335  | 3.394  | 3.133  | 3.268  | 4.260  | 3.896  | 97031  | TPRN     | NM_175286_2_+1  |
| A430005L14Rik | 6.246  | 6.100  | 5.169  | 5.313  | 5.306  | 5.247  | 5.185  | 5.174  | 4.679  | 4.485  | 97159  | C1orf174 | NM_175287_4_+1  |

|               |        |        |        |        |        |        |        |        |        |        |        |               |                 |
|---------------|--------|--------|--------|--------|--------|--------|--------|--------|--------|--------|--------|---------------|-----------------|
| Dock10        | 2.904  | 1.860  | 3.901  | 3.857  | 5.374  | 4.235  | 4.911  | 4.224  | 6.392  | 6.214  | 210293 | DOCK10        | NM_175291_1_-1  |
| D630023F18Rik | -4.981 | -4.981 | -4.698 | -4.966 | -4.893 | -4.788 | -4.931 | -4.952 | -3.340 | -4.189 | 98303  | C2orf80       | NM_175293_1_-1  |
| Nucks1        | 5.380  | 5.337  | 5.686  | 5.785  | 6.004  | 5.921  | 5.920  | 5.593  | 4.460  | 4.527  | 98415  | NUCKS1        | NM_175294_1_+1  |
| Anape2        | 5.576  | 5.679  | 6.148  | 6.249  | 6.012  | 5.943  | 6.132  | 6.308  | 6.657  | 6.588  | 99152  | ANAPC2        | NM_175300_2_+1  |
| Lrrc19        | -4.981 | -2.895 | -3.507 | -4.713 | -4.166 | -2.551 | -4.072 | -4.681 | -4.981 | -2.609 | 100061 | LRRC19        | NM_175305_4_-1  |
| Phactr4       | 2.255  | 2.175  | 1.962  | 2.667  | 2.355  | 2.584  | 2.790  | 2.762  | 2.638  | 2.492  | 100169 | PHACTR4       | NM_175306_4_-1  |
| Fam46b        | -4.981 | -4.981 | -2.744 | -2.072 | -4.978 | -4.814 | -4.976 | -4.904 | -4.981 | -4.981 | 100342 | FAM46B        | NM_175307_4_+1  |
| Mob3c         | 5.056  | 4.904  | 4.087  | 4.120  | 4.203  | 4.170  | 3.989  | 4.306  | 4.097  | 4.364  | 100465 | MOB3C         | NM_175308_4_+1  |
| Pds5b         | 4.211  | 4.238  | 4.395  | 4.128  | 4.575  | 4.449  | 4.500  | 4.436  | 4.023  | 4.412  | 100710 | PDS5B         | NM_175310_5_+1  |
| Zfp513        | 3.296  | 3.925  | 3.824  | 4.178  | 3.866  | 3.926  | 3.582  | 2.901  | 2.867  | 3.339  | 101023 | ZNFS13        | NM_175311_5_-1  |
| Bmt2          | 5.776  | 5.828  | 5.827  | 5.613  | 5.591  | 5.844  | 5.595  | 5.719  | 5.906  | 6.909  | 101148 | BMT2          | NM_175312_6_-1  |
| Eogt          | 1.746  | 2.238  | 3.655  | 3.956  | 2.689  | 3.286  | 2.371  | 3.002  | 2.816  | 3.194  | 101351 | EOGT          | NM_175313_6_-1  |
| Ceacam15      | 1.167  | -4.981 | -4.981 | -4.981 | 1.273  | -4.512 | -3.612 | -4.903 | -4.981 | -4.981 | 101434 | NA            | NM_175315_7_-1  |
| Slco2b1       | -0.359 | -0.836 | -1.910 | -1.400 | -1.541 | -1.687 | -0.629 | -1.002 | -4.596 | -1.982 | 101488 | SLCO2B1       | NM_175316_7_-1  |
| Efl1          | 3.093  | 3.477  | 3.768  | 2.420  | 3.099  | 3.334  | 3.332  | 2.985  | 3.261  | 2.858  | 101592 | EFL1          | NM_175317_7_+1  |
| Spty2d1       | 5.899  | 5.524  | 5.573  | 5.202  | 5.050  | 4.849  | 5.332  | 5.238  | 5.870  | 5.842  | 101685 | SPTY2D1       | NM_175318_7_-1  |
| Acad11        | 2.596  | 3.372  | 2.228  | 2.724  | 3.092  | 3.304  | 2.550  | 2.536  | 2.843  | 3.117  | 102632 | ACAD11        | NM_175324_9_+1  |
| Bbs4          | 3.157  | 3.308  | 2.195  | 2.161  | 2.466  | 2.649  | 1.976  | 2.055  | 2.239  | 2.363  | 102774 | BBS4          | NM_175325_9_-1  |
| D330045A20Rik | -4.981 | -4.981 | -2.201 | -0.440 | -0.858 | -0.815 | -1.705 | -1.840 | -4.981 | -2.993 | 102871 | CXorf57       | NM_175326_X_+1  |
| Chchd10       | 4.792  | 4.811  | 1.429  | 3.090  | 1.054  | 3.648  | 2.709  | 4.887  | 1.199  | 1.584  | 103172 | CHCHD10       | NM_175329_10_+1 |
| Nt5dc3        | 0.756  | 1.646  | 1.708  | 1.473  | 1.246  | 1.691  | 1.573  | 0.718  | 1.507  | 1.804  | 103466 | NT5DC3        | NM_175331_10_+1 |
| E130012A19Rik | 0.295  | 0.966  | 1.821  | 1.740  | 1.680  | 1.575  | 1.194  | 1.389  | -1.160 | -1.223 | 103551 | C17orf96      | NM_175332_11_-1 |
| Slc25a41      | -3.668 | -3.267 | -4.062 | -4.197 | -4.895 | -3.132 | -4.974 | -4.420 | -4.981 | -3.758 | 103775 | SLC25A41      | NM_175333_17_-1 |
| Maml1         | 3.023  | 2.912  | 2.351  | 2.306  | 3.322  | 3.044  | 3.500  | 2.857  | 3.630  | 3.701  | 103806 | MAML1         | NM_175334_11_-1 |
| Gtf2a1        | 2.031  | 2.327  | 1.750  | 1.030  | 2.659  | 1.733  | 1.988  | 1.638  | 2.160  | 1.557  | 83602  | GTF2A1        | NM_175335_12_-1 |
| Tecpr2        | -3.530 | -3.022 | -2.092 | -3.876 | -4.292 | -4.570 | -2.026 | -2.560 | -3.535 | -0.554 | 104859 | TECPR2        | NM_175336_12_+1 |
| MLh3          | 3.167  | 1.990  | 3.157  | 3.297  | 2.898  | 3.569  | 2.192  | 3.159  | 2.809  | 3.326  | 217716 | MLH3          | NM_175337_12_-1 |
| Nhlrc1        | -0.353 | 0.616  | 0.469  | 0.967  | 1.346  | 1.995  | 0.911  | 0.719  | -0.860 | 0.224  | 105193 | NHLRC1        | NM_175340_13_-1 |
| Mbnl2         | -1.974 | 1.827  | 1.860  | 2.095  | 0.940  | 1.513  | 2.435  | 2.540  | 2.604  | 2.945  | 105559 | MBNL2         | NM_175341_14_+1 |
| Chdh          | 3.681  | 3.832  | -4.468 | -3.041 | -4.957 | -4.946 | -4.824 | -4.829 | -4.548 | -4.733 | 218865 | CHDH          | NM_175343_14_+1 |
| Ano6          | 3.918  | 3.779  | 6.016  | 6.078  | 4.323  | 4.620  | 5.101  | 5.523  | 6.864  | 6.954  | 105722 | ANO6          | NM_175344_15_+1 |
| Srl           | 4.252  | 4.629  | 1.014  | 0.972  | 0.475  | -0.615 | -1.395 | -0.999 | -0.102 | 0.840  | 106393 | SRL           | NM_175347_16_-1 |
| Ldhal6b       | -4.981 | -4.981 | -4.570 | -2.863 | -4.419 | -4.818 | -4.869 | -4.022 | -3.022 | -3.853 | 106557 | LDHAL6B       | NM_175349_17_-1 |
| Catsperd      | -4.981 | -4.981 | -0.971 | -1.404 | -3.073 | -2.245 | -4.954 | -2.290 | -4.981 | -4.981 | 106757 | CATSPERD      | NM_175350_17_+1 |
| Unc119b       | 4.275  | 4.513  | 7.352  | 7.081  | 4.249  | 3.979  | 4.810  | 5.699  | 6.182  | 6.101  | 106840 | UNC119B       | NM_175352_5_-1  |
| Exoc6         | 5.685  | 5.491  | 5.986  | 6.135  | 6.525  | 6.805  | 6.100  | 6.188  | 6.480  | 6.408  | 107371 | EXOC6         | NM_175353_19_+1 |
| Pi4kb         | 2.975  | 3.564  | 3.829  | 4.432  | 3.765  | 4.366  | 3.180  | 4.026  | 3.920  | 4.641  | 107650 | PI4KB         | NM_175356_3_+1  |
| Crbn          | 4.995  | 4.461  | 4.622  | 4.282  | 4.752  | 4.497  | 4.824  | 4.741  | 4.959  | 5.132  | 58799  | CRBN          | NM_175357_6_-1  |
| Zdhhc15       | 1.944  | 2.674  | 0.054  | -0.155 | 1.413  | 0.878  | 1.065  | 0.488  | -0.452 | -1.398 | 108672 | ZDHHC15       | NM_175358_X_-1  |
| Obfc1         | 4.982  | 5.106  | 4.952  | 4.520  | 4.418  | 4.217  | 4.553  | 4.735  | 5.200  | 5.238  | 108689 | OBFC1         | NM_175360_19_-1 |
| Card11        | 6.726  | 6.870  | 5.136  | 5.587  | 6.246  | 6.793  | 5.342  | 4.974  | 1.335  | -0.334 | 108723 | CARD11        | NM_175362_5_-1  |
| Pphln1        | 3.965  | 3.802  | 5.149  | 4.920  | 4.739  | 4.405  | 4.442  | 4.231  | 4.910  | 4.403  | 223828 | PPHLN1        | NM_175363_15_+1 |
| Lymr2         | 5.346  | 5.001  | 5.252  | 5.146  | 4.886  | 4.917  | 5.179  | 4.939  | 4.433  | 4.252  | 108755 | LYRM2         | NM_175364_4_+1  |
| Mex3b         | -0.104 | -0.854 | 1.405  | 1.235  | -0.994 | -2.284 | 0.266  | -0.878 | -0.505 | -1.375 | 108797 | MEX3B         | NM_175366_7_+1  |
| Ston2         | 1.644  | 2.459  | 1.218  | 0.351  | 4.522  | 3.888  | 2.847  | 1.157  | 0.906  | -0.547 | 108800 | STON2         | NM_175367_12_-1 |
| Ccdc122       | 4.871  | 4.866  | 4.869  | 4.766  | 4.882  | 5.120  | 4.609  | 3.718  | 2.256  | 1.685  | 108811 | CCDC122       | NM_175369_14_+1 |
| Als2cr12      | 0.980  | 0.787  | -0.935 | -1.381 | -1.155 | -1.486 | 0.736  | -0.326 | -1.877 | -0.182 | 108812 | ALS2CR12      | NM_175370_1_-1  |
| Rdh13         | -3.461 | 1.783  | 0.397  | 0.487  | 0.365  | 1.081  | -0.348 | 0.231  | 1.655  | 2.133  | 108841 | RDH13         | NM_175372_7_-1  |
| Mtrf1l        | 4.097  | 3.971  | 3.331  | 3.273  | 3.369  | 3.167  | 3.225  | 2.974  | 2.672  | 2.777  | 108853 | MTRF1L        | NM_175374_10_-1 |
| Ankhd1        | 5.336  | 5.507  | 6.184  | 6.038  | 6.170  | 6.144  | 6.060  | 6.056  | 5.968  | 6.318  | 108857 | ANKHD1 ANKHD1 | NM_175375_18_+1 |
| Gpd1l         | 5.439  | 5.621  | 5.288  | 5.985  | 5.874  | 7.539  | 5.504  | 5.842  | 5.719  | 5.616  | 333433 | GPD1L         | NM_175380_9_-1  |
| 2700810I5Rik  | -0.351 | -2.239 | -0.846 | -1.108 | 0.392  | -0.585 | -1.051 | -1.309 | -1.403 | -0.010 | 108899 | C11orf95      | NM_175381_19_+1 |
| Fam72a        | -0.340 | 0.025  | 1.649  | 1.699  | 1.054  | 0.214  | 0.574  | -0.135 | 0.539  | 0.614  | 108900 | FAM72A        | NM_175382_1_+1  |
| B4gat1        | 4.991  | 4.992  | 3.599  | 3.594  | 3.726  | 3.499  | 3.644  | 3.952  | 4.477  | 4.114  | 108902 | B4GAT1        | NM_175383_19_+1 |
| Cdca2         | -1.467 | -0.052 | 1.237  | 1.438  | 2.401  | 0.963  | 1.590  | 1.058  | 0.654  | -0.688 | 108912 | CDCA2         | NM_175384_14_-1 |
| Lhfp          | -0.488 | -2.437 | -1.245 | 0.571  | -3.799 | -0.108 | -2.420 | -0.132 | -2.265 | -2.572 | 108927 | LHFP          | NM_175386_3_+1  |
| Rbfox2        | -4.981 | -4.981 | -4.939 | -4.364 | -4.962 | -4.900 | -3.271 | -3.693 | -4.981 | -4.962 | 93686  | RBFOX2        | NM_175387_15_-1 |
| Rnf169        | 3.362  | 3.621  | 4.357  | 3.495  | 4.064  | 3.654  | 4.480  | 3.806  | 4.781  | 4.665  | 108937 | RNF169        | NM_175388_7_-1  |
| Trmt10a       | 1.941  | 2.815  | 2.613  | 3.052  | 2.837  | 3.515  | 2.537  | 2.390  | 0.827  | 1.453  | 108943 | TRMT10A       | NM_175389_3_+1  |
| Apol7c        | 3.118  | -3.636 | 10.554 | 3.418  | 7.874  | -2.382 | 7.208  | -3.001 | -1.711 | -4.981 | 108956 | NA            | NM_175391_15_-1 |
| Miga2         | -3.999 | -3.804 | -3.139 | -4.535 | -4.627 | -4.889 | -4.410 | -4.774 | -4.245 | -4.720 | 108958 | MIGA2         | NM_175392_2_+1  |
| 4930555G01Rik | -4.981 | -4.981 | -4.982 | -4.047 | -3.816 | -0.635 | -4.956 | -4.308 | -4.981 | -4.981 | 108978 | NA            | NM_175393_14_+1 |
| Wtap          | 5.471  | 5.661  | 5.168  | 5.615  | 4.871  | 5.269  | 5.085  | 5.280  | 4.838  | 5.592  | 60532  | WTAP          | NM_175394_17_-1 |
| Sp110         | 4.989  | 3.470  | 2.217  | 2.155  | 2.421  | 2.345  | 2.598  | 2.200  | 1.743  | 1.970  | 109032 | SP110         | NM_175397_1_-1  |
| Fam212b       | -4.444 | -3.394 | -3.421 | -2.851 | -3.607 | -2.106 | -3.639 | -3.394 | -4.568 | -4.664 | 109050 | FAM212B       | NM_175398_3_+1  |
| Exosc4        | 6.424  | 6.144  | 5.558  | 5.484  | 5.374  | 5.237  | 5.610  | 5.364  | 4.993  | 4.762  | 109075 | EXOSC4        | NM_175399_15_+1 |
| Seph51        | 4.512  | 4.704  | 4.997  | 5.190  | 5.061  | 4.971  | 4.911  | 4.960  | 5.063  | 5.249  | 109079 | SEPH51        | NM_175400_2_+1  |
| Fbxw17        | 3.495  | 3.779  | 4.435  | 4.056  | 3.227  | 3.717  | 3.200  | 3.247  | 3.427  | 2.886  | 109082 | NA            | NM_175401_13_+1 |
| Rbm15b        | 3.332  | 3.447  | 2.371  | 2.425  | 2.327  | 2.257  | 2.404  | 2.249  | 3.347  | 3.058  | 109095 | RBM15B        | NM_175402_9_-1  |
| Mlec          | 6.575  | 6.222  | 7.788  | 7.860  | 6.069  | 5.714  | 5.957  | 6.521  | 6.399  | 6.673  | 109154 | MLEC          | NM_175403_5_-1  |
| Tmem139       | -4.981 | -4.981 | -1.683 | -3.083 | -4.473 | -4.337 | -4.006 | -4.963 | -4.190 | -3.480 | 109218 | TMEM139       | NM_175408_6_+1  |
| Fam118b       | 2.265  | 2.265  | 1.964  | 2.010  | 1.878  | 2.154  | 2.525  | 2.450  | 3.000  | 3.383  | 109229 | FAM118B       | NM_175411_9_-1  |
| Lrrc39        | 1.290  | 1.140  | 1.114  | 0.785  | 0.763  | 0.629  | 0.397  | 0.405  | 0.440  | 0.889  | 109245 | LRRC39        | NM_175413_3_+1  |
| Tspan9        | 0.405  | -0.299 | 3.672  | 4.043  | 5.288  | 5.324  | 4.059  | 3.404  | 0.509  | 1.327  | 109246 | TSPAN9        | NM_175414_6_-1  |

|               |          |        |        |        |        |        |        |        |        |        |        |           |                 |                 |
|---------------|----------|--------|--------|--------|--------|--------|--------|--------|--------|--------|--------|-----------|-----------------|-----------------|
| Adtrp         | 2.270    | 2.547  | -2.408 | -3.011 | -0.935 | -0.778 | -0.922 | -1.167 | -0.366 | -1.885 | 109254 | ADTRP     | NM_175417_13_-1 |                 |
| Mybpc1        | -4.981   | -4.981 | -4.383 | -4.331 | -4.834 | -4.963 | -3.218 | -3.538 | -4.981 | -4.981 | 109272 | MYBPC1    | NM_175418_10_-1 |                 |
| Actr5         | 4.064    | 4.094  | 3.949  | 3.883  | 3.949  | 3.968  | 4.033  | 4.134  | 4.024  | 3.937  | 109275 | ACTR5     | NM_175419_2_+1  |                 |
| Plekhh2       | 0.348    | 1.462  | 2.324  | 2.229  | 0.888  | 1.465  | 0.728  | 0.924  | 1.411  | 1.561  | 226971 | PLEKHB2   | NM_175421_1_+1  |                 |
| Orai1         | 4.876    | 5.085  | 6.143  | 6.185  | 5.455  | 5.324  | 6.354  | 6.418  | 7.123  | 6.842  | 109305 | ORAI1     | NM_175423_5_+1  |                 |
| Zbtb21        | 3.008    | 2.288  | -0.428 | 0.388  | 2.154  | 2.279  | 1.731  | 2.055  | 2.221  | 2.145  | 114565 | ZBTB21    | NM_175428_16_-1 |                 |
| Kctd12b       | -0.857   | -0.880 | 0.211  | -0.879 | 1.016  | 1.334  | 2.781  | 3.362  | 4.354  | 5.359  | 207474 | NA        | NM_175429_X_-1  |                 |
| Ccdc40        | 0.718    | 1.169  | -0.298 | 0.643  | -0.611 | -0.476 | 0.063  | -0.915 | -2.106 | -1.760 | 207607 | CCDC40    | NM_175430_11_+1 |                 |
| Fam228b       | -0.708   | -0.386 | -1.121 | -1.326 | -1.629 | -0.590 | -1.583 | -1.971 | -4.981 | -3.165 | 207921 | FAM228B   | NM_175431_12_-1 |                 |
| Tmem132c      | -4.981   | -4.981 | -3.346 | -2.791 | 3.293  | 1.098  | 0.270  | -2.380 | -4.981 | -4.227 | 208213 | TMEM132C  | NM_175432_5_+1  |                 |
| Zfp710        | 3.242    | 3.003  | 4.309  | 4.800  | 4.974  | 5.137  | 4.244  | 5.340  | 6.049  | 6.243  | 209225 | ZNF710    | NM_175433_7_+1  |                 |
| Zfp526        | -0.505   | 0.441  | -0.306 | 0.198  | 0.146  | -0.232 | 0.203  | -0.323 | 0.821  | 0.338  | 210172 | ZNF526    | NM_175436_7_+1  |                 |
| Gsap          | 4.513    | 3.895  | 7.164  | 7.450  | 6.785  | 7.263  | 6.961  | 7.118  | 6.907  | 7.054  | 212167 | GSAP      | NM_175437_5_+1  |                 |
| Aldh4a1       | 2.416    | 2.982  | 2.941  | 3.273  | 2.866  | 3.310  | 2.916  | 3.317  | 3.866  | 4.160  | 212647 | ALDH4A1   | NM_175438_4_+1  |                 |
| Mars2         | 2.373    | 2.198  | 2.638  | 2.692  | 2.147  | 1.799  | 2.014  | 2.790  | 3.273  | 2.833  | 212679 | MARS2     | NM_175439_1_+1  |                 |
| Prss27        | -2.842   | -4.981 | -3.043 | -4.682 | -4.631 | -4.786 | -4.141 | -4.743 | -2.946 | -4.316 | 213171 | PRSS27    | NM_175440_17_+1 |                 |
| Mylk3         | -4.981   | -4.841 | -4.948 | -4.952 | -4.969 | -4.980 | -4.980 | -4.978 | -4.961 | -4.975 | 213435 | MYLK3     | NM_175441_8_-1  |                 |
| A63003H20Rik  | 3.202    | 1.311  | 0.645  | 1.828  | 2.615  | 2.403  | 2.382  | 2.498  | 3.879  | 3.625  | 213438 | NA        | NM_175442_X_+1  |                 |
|               | Etnk2    | -4.981 | -4.981 | -4.935 | -4.935 | -4.904 | -4.813 | -4.959 | -4.404 | -4.981 | -2.609 | 214253    | ETNK2           | NM_175443_1_+1  |
|               | Rassf2   | 3.270  | 3.074  | 4.904  | 5.094  | 5.956  | 5.715  | 5.626  | 5.472  | 6.188  | 6.542  | 215653    | RASSF2          | NM_175445_2_-1  |
|               | Zmat1    | 2.823  | 3.571  | 2.035  | 2.216  | 3.243  | 3.294  | 2.432  | 2.529  | 1.678  | 1.796  | 215693    | ZMAT1           | NM_175446_X_-1  |
|               | Fam26f   | 3.935  | 3.331  | 5.059  | 4.949  | 4.693  | 4.082  | 6.080  | 6.402  | 5.136  | 5.770  | 215900    | FAM26F          | NM_175449_10_-1 |
|               | Wdr18    | 6.117  | 5.853  | 5.495  | 5.531  | 5.257  | 5.394  | 5.394  | 5.736  | 5.038  | 4.791  | 216156    | WDR18           | NM_175450_10_+1 |
|               | Ckap4    | 1.699  | 3.413  | 2.201  | 1.840  | 1.277  | 1.905  | 3.309  | 5.032  | 6.258  | 6.066  | 216197    | CKAP4           | NM_175451_10_-1 |
|               | Hid1     | 3.623  | 3.912  | -0.438 | -0.176 | -3.062 | -1.647 | -0.480 | 2.081  | -1.940 | -0.757 | 217310    | HID1            | NM_175454_11_-1 |
|               | Ankrd34b | -3.189 | -4.981 | -4.695 | -4.327 | -5.001 | -5.001 | -3.872 | -4.961 | -3.823 | -3.233 | 218440    | ANKRD34B        | NM_175455_13_+1 |
|               | Mroh1    | 4.846  | 4.673  | 4.505  | 4.908  | 3.976  | 4.415  | 4.205  | 4.719  | 5.415  | 5.581  | 223658    | MROH1           | NM_175457_15_+1 |
|               | Glis3    | -3.444 | -3.082 | -4.866 | -4.694 | -3.104 | -4.705 | -3.177 | -2.761 | -0.907 | -0.055 | 226075    | GLIS3           | NM_175459_19_-1 |
| Fam78b        | -4.981   | -4.981 | -4.981 | -3.654 | -4.717 | -4.764 | -1.655 | -4.052 | -4.212 | -0.127 | 226610 | FAM78B    | NM_175461_1_+1  |                 |
| Kcnt1         | -4.981   | -4.981 | -4.978 | -4.921 | -4.870 | -4.885 | -4.969 | -4.689 | -4.981 | -4.981 | 227632 | KCNT1     | NM_175462_2_+1  |                 |
| Pkp4          | 1.429    | 1.618  | 2.293  | 1.501  | -0.121 | -1.325 | 1.589  | 0.750  | 1.025  | 1.171  | 227937 | PKP4      | NM_175464_2_+1  |                 |
| Sestd1        | -0.140   | -0.019 | 3.629  | 3.848  | 3.044  | 2.634  | 3.425  | 3.840  | 5.390  | 5.128  | 228071 | SESTD1    | NM_175465_2_-1  |                 |
| Zfp770        | 1.272    | 1.589  | 2.774  | 3.182  | 4.088  | 4.510  | 3.666  | 3.432  | 2.458  | 3.332  | 228491 | ZNF770    | NM_175466_2_-1  |                 |
| Cyb5r1        | 2.612    | 2.584  | 1.683  | 1.407  | 0.804  | 0.844  | 0.866  | 0.668  | 1.322  | 1.051  | 230582 | CYB5R1    | NM_175471_4_+1  |                 |
| Zcchc11       | 4.708    | 4.343  | 5.509  | 5.242  | 5.859  | 5.940  | 5.664  | 5.426  | 4.319  | 4.319  | 230594 | ZCCHC11   | NM_175472_4_+1  |                 |
| Fras1         | -4.981   | -4.981 | -4.983 | -4.983 | -2.201 | -3.306 | -3.329 | -4.780 | -4.981 | -4.981 | 231470 | FRAS1     | NM_175473_5_+1  |                 |
| Fam109a       | 0.731    | 1.270  | 1.939  | 1.516  | 1.599  | 1.646  | 1.887  | 2.001  | 3.396  | 3.346  | 231717 | FAM109A   | NM_175474_5_+1  |                 |
| Cyp26b1       | -4.981   | -3.074 | -4.035 | -4.700 | -4.981 | -4.976 | -4.981 | -4.981 | -4.483 | -4.981 | 232174 | CYP26B1   | NM_175475_6_-1  |                 |
| Arhgap25      | 4.799    | 4.807  | 2.320  | 1.083  | 3.976  | 4.144  | 3.698  | 3.198  | 3.062  | 3.043  | 232201 | ARHGAP25  | NM_175476_6_-1  |                 |
| Zfp574        | 2.518    | 2.735  | 2.304  | 1.679  | 2.720  | 2.856  | 2.326  | 1.833  | 3.723  | 2.653  | 232976 | ZNF574    | NM_175477_7_+1  |                 |
| Zfp612        | -1.340   | 0.920  | -3.543 | 1.011  | -3.913 | 1.627  | -3.929 | 0.285  | -4.981 | -4.981 | 234725 | ZNF23     | NM_175480_8_+1  |                 |
| Usp28         | 3.067    | 2.892  | 2.613  | 2.163  | 2.601  | 2.628  | 2.633  | 3.818  | 2.470  | 4.434  | 235323 | USP28     | NM_175482_9_+1  |                 |
| Snx33         | 1.307    | 0.603  | 0.569  | 1.031  | 0.967  | 0.832  | 1.374  | 1.449  | 3.045  | 2.658  | 235406 | SNX33     | NM_175483_9_-1  |                 |
| 643057L13Rik  | -4.981   | -4.981 | -1.532 | -3.098 | -4.217 | -4.376 | -4.147 | -4.966 | -4.981 | -4.981 | 235599 | C3orf18   | NM_175486_9_+1  |                 |
| Ccdc38        | -0.212   | 3.587  | -1.353 | -0.605 | -2.031 | 0.861  | -0.932 | -0.871 | -1.945 | -1.876 | 237465 | CCDC38    | NM_175488_10_+1 |                 |
| Osbpl8        | 4.198    | 3.356  | 4.049  | 3.762  | 4.871  | 4.445  | 4.944  | 4.624  | 4.137  | 4.361  | 237542 | OSBPL8    | NM_175489_10_+1 |                 |
| Smcr8         | -0.788   | -0.644 | 0.580  | -1.132 | -0.291 | -1.645 | -1.343 | -2.514 | 0.011  | -0.526 | 237782 | SMCR8     | NM_175491_11_+1 |                 |
| Gpr68         | -0.318   | -4.725 | 2.810  | 2.181  | 3.027  | 2.429  | 3.426  | 3.028  | -4.798 | 0.664  | 238377 | GPR68     | NM_175493_12_-1 |                 |
| Zfp367        | 3.387    | 2.235  | 5.631  | 3.880  | 3.625  | 1.990  | 3.355  | 1.637  | 2.720  | 0.597  | 238673 | ZNF367    | NM_175494_13_-1 |                 |
| Gpr150        | -0.852   | -4.981 | -4.729 | -4.774 | -2.321 | -4.939 | -3.804 | -2.846 | -0.425 | -0.673 | 238725 | GPR150    | NM_175495_13_-1 |                 |
| Tmem74        | -4.981   | -4.981 | -4.494 | -4.960 | -0.026 | -2.745 | -4.833 | -4.313 | -4.190 | -4.227 | 239408 | TMEM74    | NM_175502_15_-1 |                 |
| Aard          | -4.981   | -4.981 | -4.931 | -4.931 | -1.207 | -2.152 | -4.453 | -4.976 | -4.981 | -4.981 | 239435 | AARD      | NM_175503_15_+1 |                 |
| Slc35g1       | 0.418    | -0.356 | 1.710  | 2.282  | -0.568 | 0.249  | -0.412 | 1.563  | -1.643 | 1.677  | 240660 | SLC35G1   | NM_175507_19_+1 |                 |
| Fam78a        | 2.432    | 1.757  | 1.960  | 1.842  | 2.190  | 2.183  | 2.864  | 2.842  | 3.726  | 3.688  | 241303 | FAM78A    | NM_175511_2_-1  |                 |
| Dhrs9         | -4.981   | -4.981 | -0.147 | -1.045 | -0.331 | -3.454 | -1.507 | 0.199  | -2.351 | -1.995 | 241452 | DHRS9     | NM_175512_2_+1  |                 |
| Fam171b       | -1.037   | 1.154  | -4.728 | -4.054 | -4.284 | -4.980 | -4.961 | -4.496 | -4.981 | -2.159 | 241520 | FAM171B   | NM_175514_2_+1  |                 |
| Intu          | 2.640    | 3.703  | 0.835  | 0.687  | 1.035  | 1.727  | 1.136  | 0.827  | 0.566  | 0.681  | 380614 | INTU      | NM_175515_3_+1  |                 |
| Tmem245       | 1.946    | 1.880  | 2.785  | 2.508  | 2.779  | 2.830  | 1.947  | 2.495  | 2.599  | 3.294  | 242474 | TMEM245   | NM_175518_4_-1  |                 |
| Hcar1         | -4.981   | -4.981 | -0.594 | 2.087  | -4.968 | -4.968 | -4.967 | -4.974 | -4.981 | -4.981 | 243270 | HCAR1     | NM_175520_5_-1  |                 |
| Nyap1         | -4.981   | -4.981 | -4.577 | -4.186 | -3.887 | -4.777 | -3.961 | -4.856 | -0.742 | -0.625 | 243300 | NYAP1     | NM_175521_5_-1  |                 |
| Ppm1k         | 4.273    | 4.167  | 5.205  | 4.690  | 4.802  | 4.323  | 4.439  | 3.949  | 3.593  | 3.058  | 243382 | PPM1K     | NM_175523_6_-1  |                 |
| Clec1a        | 0.653    | 1.700  | 3.031  | 2.743  | -0.823 | -1.212 | 0.773  | 0.094  | 0.199  | -1.394 | 243653 | CLEC1A    | NM_175526_6_-1  |                 |
| E330009J07Rik | -1.171   | -0.334 | -0.535 | -0.289 | 0.941  | 0.093  | 0.877  | 0.444  | 1.518  | 1.236  | 243780 | KIAA1147  | NM_175528_6_-1  |                 |
| Leng9         | 3.567    | 3.477  | 2.611  | 2.542  | 3.187  | 3.814  | 4.093  | 3.885  | 4.249  | 4.268  | 243813 | LENG9     | NM_175529_7_-1  |                 |
| Fbxo46        | 2.484    | 2.961  | 2.936  | 3.528  | 2.703  | 3.202  | 2.399  | 3.079  | 3.241  | 3.544  | 243867 | FBXO46    | NM_175530_7_+1  |                 |
| Nlrp10        | 0.723    | 2.039  | -0.502 | 2.047  | 4.021  | 3.771  | 2.863  | 2.559  | 1.146  | 2.906  | 244202 | NLRP10    | NM_175532_7_-1  |                 |
| Mrgpre        | 1.131    | 0.088  | -0.491 | -0.332 | -1.867 | -1.249 | -0.763 | -0.088 | -1.639 | -2.007 | 244238 | MRGPRE    | NM_175534_7_-1  |                 |
| Arhgap20      | -4.981   | -4.981 | -4.880 | -4.521 | -4.650 | -2.288 | -4.971 | -3.881 | -4.394 | -4.981 | 244867 | ARHGAP20  | NM_175535_9_+1  |                 |
| Zbtb38        | 3.545    | 3.317  | 3.403  | 3.672  | 3.365  | 3.454  | 2.823  | 3.307  | 3.225  | 3.384  | 245007 | ZBTB38    | NM_175537_9_-1  |                 |
| Nim1k         | 2.682    | 2.926  | -1.887 | -2.834 | -2.759 | -2.571 | -1.615 | -0.343 | 1.792  | 1.372  | 245269 | NIM1K     | NM_175538_13_-1 |                 |
| Dcaf12l2      | -4.981   | -4.981 | -4.981 | -4.981 | -2.904 | -2.091 | -4.971 | -4.805 | -4.981 | -4.981 | 245403 | DCAF12L2  | NM_175539_X_-1  |                 |
| Rttn          | 2.059    | 1.525  | 1.488  | 1.532  | 2.634  | 2.359  | 2.253  | 1.385  | 2.771  | 2.610  | 246102 | RTTN      | NM_175542_18_+1 |                 |
| Rab11fip4     | -0.501   | -1.910 | 3.244  | 2.918  | 2.382  | 2.055  | 2.198  | 1.658  | 1.542  | 1.375  | 268451 | RAB11FIP4 | NM_17           |                 |

|               |        |        |        |        |        |        |        |        |        |        |        |           |                      |
|---------------|--------|--------|--------|--------|--------|--------|--------|--------|--------|--------|--------|-----------|----------------------|
| Nlrc3         | -2.925 | -4.981 | -3.991 | -4.894 | -4.182 | -3.227 | -3.738 | -1.457 | -3.022 | -2.295 | 268857 | NLRC3     | NM_175547_16_-1      |
| Robo2         | 2.550  | 3.328  | -3.281 | -3.190 | -4.971 | -4.971 | -4.983 | -4.977 | -4.394 | -2.064 | 268902 | ROBO2     | NM_175549_16_-1      |
| Ap4e1         | 3.116  | 3.244  | 3.444  | 3.338  | 3.258  | 3.550  | 3.469  | 3.288  | 3.947  | 4.128  | 108011 | AP4E1     | NM_175550_2_+1       |
| Dido1         | 3.384  | 3.735  | 4.223  | 4.083  | 4.481  | 4.283  | 3.978  | 3.631  | 4.131  | 4.145  | 23856  | DIDO1     | NM_175551_2_-1       |
| Wdr3          | 4.556  | 4.528  | 5.520  | 5.560  | 5.118  | 5.180  | 5.658  | 5.875  | 6.967  | 6.910  | 269470 | WDR3      | NM_175552_3_-1       |
| Clspn         | 0.998  | 1.650  | 2.157  | 1.907  | 3.081  | 2.496  | 2.323  | 1.509  | -0.181 | -1.135 | 269582 | CLSPN     | NM_175554_4_+1       |
| Zfp384        | 3.090  | 3.171  | 4.683  | 4.694  | 4.556  | 4.411  | 4.477  | 4.365  | 4.726  | 4.936  | 269800 | ZNF384    | NM_175557_6_+1       |
| Zfp446        | 1.666  | 1.781  | 1.174  | 1.277  | 0.850  | 0.781  | 0.392  | 0.779  | 0.860  | 0.191  | 269870 | ZNF446    | NM_175558_7_+1       |
| Zfp747        | 1.631  | 1.454  | 2.576  | 2.366  | 2.341  | 1.747  | 2.479  | 2.625  | 3.162  | 3.364  | 269997 | NA        | NM_175560_7_-1       |
| Pcnx2         | -4.981 | -2.275 | -4.961 | -4.587 | -4.250 | -4.873 | -4.711 | -4.363 | -2.989 | -1.705 | 270109 | PCNX2     | NM_175561_8_-1       |
| Rab39         | 1.923  | 2.549  | 5.363  | 5.254  | 3.005  | 2.669  | 3.298  | 3.694  | 2.582  | 3.546  | 270160 | RAB39A    | NM_175562_9_-1       |
| Prr11         | -1.820 | -0.173 | 1.291  | 1.288  | 1.729  | 1.064  | 1.088  | 0.662  | -0.276 | -0.661 | 270906 | PRR11     | NM_175563_11_-1      |
| Cdv3          | 3.784  | 2.316  | 2.227  | 1.356  | -0.366 | -2.498 | 0.768  | 1.833  | -1.958 | 0.684  | 321022 | CDV3      | NM_175565_9_-1       |
| Hopx          | -4.981 | -4.981 | -4.981 | -4.981 | -4.981 | -4.981 | -4.103 | -4.864 | -3.216 | -3.235 | 74318  | HOPX      | NM_175606_5_-1       |
| Oscar         | -4.981 | -4.981 | -4.981 | -4.981 | -4.941 | -4.830 | -4.970 | -4.924 | -4.981 | -4.430 | 232790 | OSCAR     | NM_175632_7_-1       |
| Wnk4          | -2.443 | -4.981 | -2.837 | -3.568 | -3.198 | -3.387 | -2.724 | -2.599 | -1.647 | -1.604 | 69847  | WNK4      | NM_175638_11_+1      |
| Wdr43         | 6.029  | 5.935  | 6.419  | 6.422  | 6.089  | 5.942  | 6.002  | 5.992  | 5.494  | 5.399  | 72515  | WDR43     | NM_175639_17_+1      |
| Ltbp4         | -4.499 | -4.981 | -4.919 | -4.981 | -4.904 | -4.976 | -4.947 | -4.964 | -4.981 | -4.981 | 108075 | LTBP4     | NM_175641_7_-1       |
| Adams2        | -2.273 | -4.981 | -3.492 | -2.586 | -4.359 | -4.999 | -4.519 | -4.464 | -1.753 | -2.328 | 216725 | ADAMTS2   | NM_175643_11_+1      |
| Xylt1         | 0.714  | 0.344  | -0.920 | -1.792 | -1.637 | -0.858 | 2.022  | 2.354  | 4.693  | 4.388  | 233781 | XYLT1     | NM_175645_7_+1       |
| Txn14b        | 2.284  | 2.335  | 1.392  | 1.308  | 1.710  | 1.611  | 1.683  | 1.704  | 2.844  | 2.336  | 234723 | TXNL4B    | NM_175646_8_+1       |
| Trim30b       | 3.864  | 3.887  | 4.582  | 4.448  | 4.976  | 4.737  | 4.178  | 3.947  | 3.609  | 3.601  | 244183 | NA        | NM_175648_7_-1       |
| Tnfrsf26      | -1.104 | -1.075 | 0.113  | 1.140  | -0.266 | 0.291  | 1.364  | 1.814  | 1.824  | 1.788  | 244237 | NA        | NM_175649_7_-1       |
| Hist4h4       | 1.308  | 1.103  | -0.489 | 1.700  | 0.249  | 2.123  | 0.824  | 2.076  | 0.527  | 1.541  | 320332 | HIST1H4B  | NM_175652_6_-1       |
| Hist1h3c      | -4.981 | -4.981 | -0.534 | -2.375 | -0.298 | -3.163 | -0.859 | -3.345 | -3.765 | -4.981 | 319148 | HIST2H3D  | NM_175653_13_-1      |
| Hist1h4d      | 3.601  | 0.472  | 4.492  | 1.236  | 5.047  | 1.242  | 4.655  | 0.962  | 3.772  | 0.542  | 319156 | HIST1H4A  | NM_175654_13_+1      |
| Hist1h4f      | -4.981 | -4.981 | -1.482 | -4.896 | -0.998 | -4.297 | -1.364 | -3.985 | -3.549 | -4.155 | 319157 | HIST1H4J  | NM_175655_13_-1      |
| Hist1h4i      | 1.295  | 0.126  | 1.728  | 1.034  | 1.865  | 0.887  | 2.002  | 0.449  | 1.622  | 0.349  | 319158 | HIST4H4   | NM_175656_13_-1      |
| Hist1h4n      | -0.948 | -0.221 | -4.681 | 0.124  | -4.902 | 1.165  | -4.916 | 1.104  | -4.978 | -0.214 | 319161 | HIST1H4L  | NM_175657_13_+1      |
| Hist1h4n      | -0.948 | 1.072  | -3.696 | 1.434  | -1.607 | 0.919  | -3.631 | 1.118  | -4.978 | 1.098  | 319161 | HIST1H4L  | NM_175657_dup1_13_-1 |
| Hist1h2ah     | -4.981 | -4.981 | -3.333 | -2.484 | -1.559 | -1.989 | -1.314 | -3.393 | -2.655 | -2.534 | 319168 | HIST1H2AH | NM_175659_13_-1      |
| Hist1h2ab     | -1.632 | -1.953 | 1.214  | 1.166  | 2.178  | 1.876  | 1.488  | 0.033  | -0.121 | -1.757 | 319172 | HIST1H2AD | NM_175660_13_+1      |
| Hist1h2af     | -4.981 | -4.981 | -3.731 | -3.138 | -3.173 | -3.119 | -3.665 | -4.161 | -4.981 | -4.981 | 319173 | HIST1H2AJ | NM_175661_13_+1      |
| Hist2h2ac     | 1.403  | 1.858  | 2.087  | 2.368  | 2.330  | 2.222  | 2.349  | 2.152  | 1.792  | 0.894  | 319176 | HIST2H2AC | NM_175662_3_-1       |
| Hist1h2ba     | -4.981 | -4.981 | -4.840 | -4.458 | -4.934 | -3.435 | -4.954 | -2.680 | -4.981 | -4.117 | 319177 | HIST1H2BA | NM_175663_13_-1      |
| Hist1h2bb     | -0.951 | -4.981 | 0.370  | -2.006 | 1.330  | -0.345 | 0.860  | -1.598 | -0.275 | -2.582 | 319178 | HIST1H2BB | NM_175664_13_+1      |
| Hist1h2bk     | -2.292 | -0.295 | -0.078 | 1.215  | 1.448  | 1.571  | 0.712  | 1.033  | 0.011  | 0.591  | 319184 | HIST1H2BK | NM_175665_13_+1      |
| Hist2h2bb     | -0.327 | 1.403  | -0.142 | 0.747  | 0.581  | 1.654  | 0.360  | 1.808  | 0.429  | 0.655  | 319189 | HIST2H2BF | NM_175666_3_+1       |
| Gpr4          | 3.745  | -0.546 | 7.067  | 5.883  | 5.565  | 4.782  | 2.633  | 2.615  | -2.416 | -2.126 | 319197 | GPR4      | NM_175668_7_+1       |
| Gpr82         | -3.668 | -4.981 | 4.351  | 4.550  | 4.684  | 5.618  | 3.385  | 2.671  | 0.438  | 0.603  | 319200 | GPR82     | NM_175669_X_+1       |
| Slc35f6       | 3.432  | 3.080  | 4.378  | 4.623  | 3.595  | 3.580  | 4.361  | 4.511  | 6.001  | 5.878  | 74919  | SLC35F6   | NM_175675_5_+1       |
| Trim12c       | 1.867  | 3.353  | -0.510 | 2.954  | 1.402  | 3.655  | 1.775  | 3.046  | 1.718  | 3.073  | 319236 | TRIM5     | NM_175677_7_-1       |
| Bricd5        | -0.904 | -1.102 | -4.962 | -4.540 | -4.781 | -4.701 | -4.740 | -4.137 | -3.488 | -3.929 | 319259 | BRICD5    | NM_175682_17_+1      |
| Dclre1c       | 1.502  | 2.148  | -0.432 | 0.329  | 0.111  | -3.194 | 0.591  | 0.628  | 1.670  | 2.662  | 227525 | DCLRE1C   | NM_175683_2_+1       |
| Fchsd1        | 2.813  | 2.931  | 2.809  | 2.755  | 2.252  | 2.365  | 2.375  | 1.819  | 1.779  | 2.191  | 319262 | FCHSD1    | NM_175684_18_-1      |
| A230050P20Rik | -1.000 | 0.078  | 1.911  | 1.356  | 2.964  | 2.736  | 2.107  | 1.632  | 0.575  | 0.514  | 319278 | NA        | NM_175687_9_+1       |
| A530099J19Rik | 0.145  | -0.143 | 9.369  | 9.278  | -2.021 | 0.482  | 1.939  | 5.346  | -0.465 | -0.572 | 319293 | NA        | NM_175688_13_-1      |
| Snhg11        | -3.522 | -4.981 | -2.015 | -3.605 | -2.790 | -3.570 | -4.329 | -3.780 | -2.435 | -2.716 | 319317 | NA        | NM_175692_2_+1       |
| Pianp         | -4.792 | -0.158 | 2.388  | 1.758  | -4.787 | -0.629 | -4.292 | -0.796 | -4.885 | -0.920 | 319352 | PIANP     | NM_175696_6_+1       |
| Hoxc5         | -4.981 | -4.981 | -4.981 | -4.981 | -2.778 | -4.938 | -4.879 | -4.822 | -4.981 | -4.981 | 15424  | HOXC5     | NM_175730_15_+1      |
| Acer1         | -4.981 | -4.803 | -4.685 | -4.987 | -4.886 | -4.920 | -4.426 | -4.573 | -4.229 | -3.573 | 171168 | ACER1     | NM_175731_17_-1      |
| Nup153        | 4.813  | 5.094  | 5.735  | 5.467  | 5.795  | 5.713  | 5.536  | 5.472  | 5.605  | 5.418  | 218210 | NUP153    | NM_175749_13_-1      |
| Plxna4        | -2.842 | -1.910 | -1.159 | -0.036 | -0.988 | -0.094 | -1.278 | -2.381 | -1.985 | -1.271 | 243743 | PLXNA4    | NM_175750_6_-1       |
| Zfp608        | 4.285  | 4.502  | 1.576  | 2.301  | 3.042  | 2.951  | 3.364  | 3.546  | 3.045  | 3.759  | 269023 | ZNF608    | NM_175751_18_-1      |
| Chn1          | -4.981 | -4.981 | -4.981 | -4.981 | -4.600 | -4.766 | -4.981 | -4.981 | -4.981 | -4.981 | 108699 | CHN1      | NM_175752_2_-1       |
| Taf7          | 5.976  | 5.548  | 5.501  | 5.255  | 5.998  | 5.806  | 5.813  | 4.876  | 4.991  | 4.112  | 24074  | TAF7      | NM_175770_18_-1      |
| Cdv3          | 4.778  | 5.134  | 5.521  | 4.853  | 4.939  | 4.673  | 5.026  | 4.787  | 4.919  | 4.577  | 321022 | CDV3      | NM_175833_9_-1       |
| Sptbn1        | 4.793  | 4.374  | 5.418  | 5.264  | 3.081  | 3.378  | 5.134  | 5.544  | 6.247  | 6.588  | 20742  | SPTBN1    | NM_175836_11_-1      |
| Gimap1        | 1.981  | 0.725  | -3.933 | -0.836 | -3.157 | -1.939 | -1.149 | 0.123  | -0.634 | -2.034 | 16205  | GIMAP1    | NM_175860_6_+1       |
| Rapgef5       | -4.981 | -4.981 | -1.348 | -0.191 | -1.256 | 1.578  | -0.609 | -0.185 | -0.938 | -0.335 | 217944 | RAPGEF5   | NM_175930_12_+1      |
| Pex5          | 4.146  | 3.918  | 3.876  | 3.658  | 3.330  | 3.595  | 3.790  | 3.908  | 5.147  | 5.000  | 19305  | PEX5      | NM_175933_6_-1       |
| G6pc3         | 4.863  | 5.082  | 5.269  | 5.234  | 4.858  | 5.036  | 4.832  | 4.673  | 4.413  | 4.025  | 68401  | G6PC3     | NM_175935_11_+1      |
| Cpeb2         | 0.361  | 1.905  | 3.066  | 2.957  | 1.637  | 1.125  | 2.158  | 2.417  | 2.085  | 2.469  | 231207 | CPEB2     | NM_175937_5_+1       |
| Btn2a2        | -4.420 | -4.981 | -4.935 | -4.261 | -1.574 | 0.408  | -4.218 | -4.550 | -4.981 | -4.981 | 238555 | BTN2A2    | NM_175938_13_-1      |
| Cpq           | 4.733  | 4.949  | 6.610  | 6.760  | 2.670  | 3.100  | 3.846  | 4.964  | 4.024  | 4.512  | 54381  | CPQ       | NM_176073_15_+1      |
| Hps6          | 1.879  | 1.032  | 2.767  | 2.751  | 2.598  | 2.575  | 2.590  | 2.338  | 2.587  | 2.699  | 20170  | HPS6      | NM_176785_19_+1      |
| Izumo1r       | -4.981 | -4.981 | -4.825 | -3.998 | -4.887 | -4.967 | -4.879 | -2.524 | -4.981 | -4.316 | 64931  | IZUMO1R   | NM_176807_9_-1       |
| Mcfd2         | 2.679  | 2.335  | 2.951  | 2.238  | 2.455  | 1.113  | 2.406  | 1.474  | 3.305  | 2.519  | 193813 | MCFD2     | NM_176808_17_-1      |
| C030006K11Rik | 0.358  | -0.489 | 0.515  | 0.081  | 1.064  | 0.483  | 0.504  | -0.321 | 0.326  | -1.487 | 223665 | C8orf82   | NM_176828_15_-1      |
| 4931440F15Rik | -0.073 | -1.507 | -1.211 | -0.379 | -0.649 | -2.508 | -0.917 | -2.388 | -0.910 | -1.785 | 216622 | NA        | NM_176829_11_-1      |
| P3h4          | -1.532 | -4.981 | -1.083 | -0.398 | -3.380 | -3.771 | -4.655 | -2.659 | -4.981 | -4.981 | 66180  | P3H4      | NM_176830_11_-1      |
| Ppcdc         | 6.070  | 6.249  | 5.694  | 5.504  | 5.831  | 5.952  | 5.592  | 5.570  | 4.459  | 4.226  | 66812  | PPCDC     | NM_176831_9_-1       |
| Spire1        | -0.809 | -2.009 | 1.308  | 2.173  | 3.447  | 3.331  | 3.420  | 2.756  | 1.355  | 2.619  | 68166  | SPIRE1    | NM_176832_18_-1      |
| Ppm1f         | 3.691  | 3.625  | 3.454  | 3.099  | 3.179  | 2.916  | 3.489  | 2.812  | 3.531  | 2.775  | 68606  | PPM1F     | NM_176833_16_+1      |

|               |        |        |        |        |        |        |        |        |        |        |           |          |                 |
|---------------|--------|--------|--------|--------|--------|--------|--------|--------|--------|--------|-----------|----------|-----------------|
| Rnf208        | -4.981 | -2.883 | -4.130 | -3.613 | -4.970 | -2.673 | -4.956 | -4.704 | -4.981 | -3.797 | 68846     | RNF208   | NM_176834_2_+1  |
| Dnajc22       | -2.483 | -4.981 | 0.676  | 0.792  | 3.594  | 4.251  | 1.226  | -1.085 | -4.981 | -4.981 | 72778     | DNAJC22  | NM_176835_15_+1 |
| Fam76b        | 5.811  | 5.893  | 5.152  | 5.010  | 5.246  | 5.380  | 5.569  | 5.395  | 5.606  | 5.745  | 72826     | FAM76B   | NM_176836_9_+1  |
| Arhgap18      | 4.312  | 4.755  | 7.304  | 7.170  | 5.351  | 5.264  | 5.167  | 5.432  | 4.971  | 5.322  | 73910     | ARHGAP18 | NM_176837_10_+1 |
| Esrp2         | -2.483 | -3.315 | -3.851 | -3.556 | -4.057 | -3.470 | -4.091 | -4.219 | -3.153 | -4.342 | 77411     | ESRP2    | NM_176838_8_-1  |
| Abcc5         | 0.830  | 1.343  | -0.313 | 0.777  | 0.879  | 1.399  | 2.187  | 1.979  | 2.923  | 3.038  | 27416     | ABCC5    | NM_176839_16_-1 |
| Osbpl11       | 4.460  | 4.499  | 3.900  | 4.149  | 4.579  | 5.180  | 4.579  | 4.949  | 5.749  | 6.122  | 106326    | OSBPL11  | NM_176840_16_+1 |
| Ccdc88a       | 6.543  | 7.069  | 7.228  | 7.125  | 7.329  | 7.375  | 7.769  | 7.749  | 6.762  | 7.556  | 108686    | CCDC88A  | NM_176841_11_+1 |
| Tprkb         | 4.400  | 4.898  | 4.710  | 4.723  | 4.386  | 4.421  | 4.403  | 4.348  | 3.801  | 3.914  | 69786     | TPRKB    | NM_176842_6_+1  |
| Ints5         | 3.416  | 3.144  | 4.083  | 4.117  | 3.830  | 3.731  | 3.832  | 4.048  | 4.805  | 4.622  | 109077    | INTS5    | NM_176843_19_+1 |
| Ddhd1         | 2.048  | 2.308  | 4.133  | 4.464  | 5.216  | 5.368  | 4.621  | 4.663  | 4.952  | 5.854  | 114874    | DDHD1    | NM_176845_14_-1 |
| Fbxo2         | -3.349 | -2.275 | -2.138 | -2.767 | -3.922 | -4.270 | -3.946 | -2.868 | -4.981 | -3.480 | 230904    | FBXO2    | NM_176848_4_+1  |
| Arglu1        | 5.539  | 5.444  | 5.461  | 5.110  | 5.837  | 5.750  | 5.553  | 5.121  | 4.842  | 4.623  | 234023    | ARGLU1   | NM_176849_8_-1  |
| Bptf          | 5.898  | 5.913  | 5.318  | 5.064  | 5.471  | 5.570  | 5.443  | 5.089  | 4.390  | 4.266  | 207165    | BPTF     | NM_176850_11_-1 |
| Ubash3b       | 1.984  | 3.239  | 4.804  | 5.468  | 3.001  | 4.039  | 3.771  | 4.349  | 5.557  | 4.721  | 72828     | UBASH3B  | NM_176860_9_-1  |
| Mink1         | -1.442 | 0.453  | 1.573  | 2.106  | 2.770  | 2.678  | 2.132  | 2.146  | -1.669 | 1.822  | 50932     | MINK1    | NM_176893_11_+1 |
| Ubald2        | 4.994  | 4.082  | 4.786  | 4.180  | 4.847  | 4.204  | 5.043  | 4.040  | 5.141  | 4.191  | 319370    | UBALD2   | NM_176902_11_+1 |
| CSar2         | -4.981 | -4.321 | -4.724 | -4.488 | -1.064 | 0.970  | -3.637 | -0.107 | 0.569  | 0.493  | 319430    | CSAR2    | NM_176912_7_-1  |
| Dpep2         | -4.790 | -4.727 | -1.906 | -2.338 | -2.983 | -3.947 | -0.485 | -2.085 | 0.705  | -1.406 | 319446    | DPEP2    | NM_176913_8_-1  |
| Mettl4        | 3.775  | 4.422  | 3.089  | 3.061  | 2.948  | 3.015  | 2.446  | 2.469  | 1.954  | 2.842  | 76781     | METTL4   | NM_176917_17_-1 |
| Ppm1h         | 2.121  | 0.651  | 2.134  | 0.886  | 0.440  | -0.255 | 1.177  | -0.138 | 3.088  | 1.314  | 319468    | PPM1H    | NM_176919_10_+1 |
| Itga11        | -4.981 | -4.981 | -3.778 | -4.840 | -4.955 | -4.848 | -4.970 | -4.976 | -4.981 | -4.981 | 319480    | ITGA11   | NM_176922_9_+1  |
| Wdr59         | -2.223 | -2.107 | -2.237 | -1.083 | -4.391 | -4.112 | -2.232 | -2.658 | -4.156 | -2.011 | 319481    | WDR59    | NM_176923_8_-1  |
| Brwd1         | 4.030  | 4.733  | 4.416  | 4.340  | 4.177  | 3.951  | 3.760  | 3.663  | 2.815  | 3.478  | 93871     | BRWD1    | NM_176928_16_-1 |
| Nrcam         | -4.981 | -4.349 | -4.643 | -4.944 | -4.975 | -4.941 | -4.955 | -4.970 | -4.466 | -4.786 | 319504    | NRCAM    | NM_176930_12_+1 |
| Dusp4         | -3.843 | -1.231 | -2.353 | -1.810 | -1.310 | -1.700 | -1.330 | -0.853 | -2.340 | -0.827 | 319520    | DUSP4    | NM_176933_8_+1  |
| Xkr5          | -4.981 | -4.981 | -2.368 | -4.927 | -2.918 | -2.880 | -3.385 | -4.442 | 0.771  | -4.939 | 319581    | XKR5     | NM_176951_8_-1  |
| 6430573F11Rik | -4.981 | -4.981 | -4.981 | -4.981 | -4.954 | -4.507 | -3.806 | -4.971 | -4.981 | -2.572 | 319582    | KIAA1456 | NM_176952_8_+1  |
| Lig4          | 0.999  | 0.848  | 0.757  | 1.163  | 1.579  | 1.351  | 0.876  | 0.605  | 1.758  | 1.716  | 319583    | LIG4     | NM_176953_8_-1  |
| Celf5         | -4.981 | -4.981 | -4.976 | -4.769 | -4.682 | -4.350 | -4.974 | -4.978 | -4.981 | -3.855 | 319586    | CEL5     | NM_176954_10_-1 |
| Nckap5        | -4.981 | -4.981 | -1.511 | -2.591 | -4.965 | -4.690 | -4.923 | -4.979 | -4.981 | -4.981 | 210356    | NCKAP5   | NM_176957_1_-1  |
| Hif1an        | 3.640  | 3.554  | 4.462  | 4.581  | 4.378  | 3.920  | 4.248  | 4.163  | 5.028  | 4.736  | 319594    | HIF1AN   | NM_176958_19_+1 |
| Zfp944        | 4.830  | 4.400  | 5.031  | 4.762  | 4.255  | 4.047  | 4.569  | 4.295  | 4.552  | 5.051  | 319615    | NA       | NM_176962_17_-1 |
| Galm          | -1.871 | -1.693 | 2.514  | 2.816  | 2.857  | 3.399  | 3.075  | 2.909  | 3.265  | 3.565  | 319625    | GALM     | NM_176963_17_+1 |
| Efcab5        | -2.842 | -4.981 | -4.251 | -3.120 | -2.663 | -3.553 | -3.256 | -3.112 | -0.124 | -1.548 | 319634    | EFCA5    | NM_176965_11_-1 |
| Fsd1l         | -1.529 | -0.986 | -1.800 | -1.284 | -2.757 | -1.472 | -2.243 | -2.701 | -4.981 | -2.061 | 319636    | FSD1L    | NM_176966_4_+1  |
| Nt5dc1        | 4.659  | 4.689  | 3.830  | 3.892  | 4.810  | 4.765  | 4.562  | 4.210  | 4.763  | 4.366  | 319638    | NTSDC1   | NM_176968_10_-1 |
| Rab9b         | -4.981 | -4.981 | -4.366 | -4.979 | -4.627 | -4.822 | -4.667 | -4.980 | -4.981 | -4.981 | 319642    | RAB9B    | NM_176971_X_-1  |
| Usp37         | 3.339  | 3.657  | 4.256  | 3.676  | 4.542  | 4.138  | 4.207  | 3.683  | 3.376  | 3.815  | 319651    | USP37    | NM_176972_1_-1  |
| Podxl2        | -1.049 | 0.074  | -3.107 | -2.759 | -3.346 | -4.418 | -3.284 | -4.249 | -4.981 | -3.797 | 319655    | PODXL2   | NM_176973_6_-1  |
| Cep295        | 3.297  | 3.530  | 4.031  | 3.533  | 4.422  | 4.528  | 4.260  | 3.832  | 3.356  | 3.104  | 319675    | CEP295   | NM_176976_9_-1  |
| Topbp1        | 4.267  | 4.008  | 5.215  | 4.957  | 5.750  | 5.202  | 5.461  | 4.932  | 5.015  | 4.664  | 235559    | TOPBP1   | NM_176979_9_+1  |
| Fbxo48        | 2.011  | 2.107  | 1.888  | 0.946  | 1.543  | 0.656  | 0.804  | -0.330 | -1.363 | -0.567 | 319701    | FBXO48   | NM_176982_11_+1 |
| Simc1         | 1.567  | 1.280  | 1.075  | 1.248  | 2.807  | 2.605  | 2.040  | 1.711  | 1.851  | 1.838  | 319719    | SIMC1    | NM_176987_13_+1 |
| Smo           | -4.981 | -0.232 | -1.312 | 1.491  | -1.555 | -0.059 | 0.009  | 1.085  | 1.523  | 0.925  | 319757    | SMO      | NM_176996_6_+1  |
| C130050O18Rik | 2.235  | 1.288  | 2.681  | 2.823  | 2.929  | 3.266  | 5.018  | 5.237  | 6.546  | 6.418  | 319772    | NA       | NM_177000_5_+1  |
| 9130023H24Rik | 1.944  | 1.857  | 2.072  | 2.485  | 1.968  | 1.629  | 1.497  | 1.756  | 1.447  | 2.498  | 100043133 | NA       | NM_177001_7_-1  |
| Tigar         | 2.795  | 2.843  | 2.550  | 3.386  | 3.077  | 3.098  | 2.386  | 2.437  | 2.672  | 2.434  | 319801    | TIGAR    | NM_177003_6_-1  |
| Glt1d1        | -2.443 | -0.826 | -2.813 | -1.846 | -0.848 | -0.110 | -1.612 | -2.639 | -0.958 | -2.976 | 319804    | GLT1D1   | NM_177005_5_+1  |
| Tmem229a      | -4.981 | -4.981 | -4.730 | -4.877 | -4.087 | -4.812 | -4.203 | -4.088 | -3.373 | -1.220 | 319832    | TMEM229A | NM_177013_6_-1  |
| Cobl1         | 1.175  | 2.649  | -0.242 | -2.285 | -2.943 | -0.748 | -3.508 | -1.955 | -1.875 | -2.592 | 319876    | COBL1    | NM_177025_2_-1  |
| Tmcc3         | 2.163  | 1.733  | 3.410  | 2.238  | 2.836  | 2.848  | 2.977  | 2.535  | 3.777  | 3.515  | 319880    | TMCC3    | NM_177026_10_+1 |
| Dock6         | 0.821  | -0.029 | 1.751  | 2.192  | 0.787  | 1.291  | 0.888  | 1.438  | 0.894  | 1.392  | 319899    | DOCK6    | NM_177030_9_-1  |
| Apba1         | 4.116  | 4.348  | 3.272  | 2.849  | 1.997  | 1.868  | 3.199  | 3.146  | 4.368  | 4.482  | 319924    | APBA1    | NM_177034_19_+1 |
| Ceacam19      | -3.349 | -4.981 | 0.350  | -3.807 | 0.816  | -3.759 | 1.255  | -3.852 | 4.008  | -1.760 | 319930    | CEACAM19 | NM_177036_7_-1  |
| Trappc8       | 4.623  | 5.113  | 5.276  | 5.152  | 5.133  | 5.314  | 4.986  | 5.204  | 5.774  | 5.958  | 75964     | TRAPPC8  | NM_177038_18_-1 |
| Flad1         | 5.770  | 5.614  | 5.225  | 5.427  | 5.552  | 5.661  | 5.496  | 5.514  | 5.227  | 5.149  | 319945    | FLAD1    | NM_177041_3_-1  |
| Cc2d1b        | 4.126  | 4.119  | 4.850  | 4.966  | 4.942  | 4.949  | 4.664  | 4.552  | 5.159  | 4.792  | 319965    | CC2D1B   | NM_177045_4_+1  |
| Auts2         | -0.971 | -2.681 | -4.687 | -4.221 | -3.530 | -3.213 | -4.224 | -3.159 | -3.189 | -3.167 | 319974    | AUTS2    | NM_177047_5_-1  |
| Casc4         | 0.181  | 1.344  | -4.287 | -4.128 | -4.078 | -4.825 | -4.561 | -4.747 | -4.485 | -4.809 | 319996    | CASC4    | NM_177054_2_+1  |
| A630001G21Rik | 4.259  | 2.664  | 3.980  | 2.804  | 4.057  | 3.487  | 4.595  | 3.932  | 4.363  | 3.807  | 319997    | NA       | NM_177055_1_-1  |
| Tmem198       | -3.668 | -4.981 | -0.449 | -0.918 | -1.767 | -2.579 | -2.936 | -2.296 | -4.190 | -4.981 | 319998    | TMEM198  | NM_177056_1_+1  |
| Fstl4         | -3.563 | -3.408 | -4.971 | -4.782 | -4.975 | -4.846 | -3.325 | -3.577 | -4.190 | -4.981 | 320027    | FSTL4    | NM_177059_11_+1 |
| Olfml2b       | -4.981 | -4.981 | -2.557 | -3.455 | -4.952 | -3.950 | -4.230 | -3.987 | 2.093  | -1.631 | 320078    | OLFML2B  | NM_177068_1_+1  |
| Relt          | 4.737  | 4.520  | 4.570  | 5.211  | 7.001  | 6.875  | 6.657  | 6.466  | 7.185  | 7.106  | 320100    | RELT     | NM_177073_7_-1  |
| Slc38a11      | -1.049 | -4.981 | -4.981 | -4.981 | -4.972 | -4.872 | -4.981 | -4.981 | -4.981 | -4.981 | 320106    | SLC38A11 | NM_177074_2_-1  |
| Fndc9         | -0.703 | -0.385 | -0.125 | -0.959 | -1.554 | -1.360 | -1.107 | -2.551 | -0.932 | -1.588 | 320116    | FND9     | NM_177075_11_+1 |
| Fbxl13        | 5.831  | 6.548  | -0.844 | -1.188 | -4.315 | -2.511 | -4.958 | -2.021 | -4.981 | -4.981 | 320118    | FBXL13   | NM_177076_5_-1  |
| Exoc6b        | 2.624  | 3.420  | 3.953  | 3.756  | 3.379  | 3.535  | 3.572  | 3.675  | 4.295  | 4.578  | 75914     | EXOC6B   | NM_177077_6_-1  |
| Grk3          | 3.747  | 2.847  | 6.291  | 6.910  | 7.510  | 8.288  | 7.490  | 7.632  | 6.442  | 7.110  | 320129    | GRK3     | NM_177078_5_-1  |
| Ptpn7         | 2.359  | 3.014  | 4.794  | 5.049  | 5.016  | 1.922  | 3.111  | 4.425  | 5.087  | 4.637  | 320139    | PTPN7    | NM_177081_1_+1  |
| B430306N03Rik | 3.779  | -1.198 | 2.299  | 3.106  | 2.324  | 1.354  | 3.651  | 4.714  | 6.126  | 6.608  | 320148    | NA       | NM_177083_17_+1 |
| Slc9a4        | -4.981 | -4.981 | -0.661 | -0.273 | -3.090 | -3.597 | -2.350 | -1.468 | -0.403 | 0.115  | 110895    | SLC9A4   | NM_177084_1_+1  |
| Zmat4         | -4.981 | -4.981 | -0.968 | -2.774 | -3.980 | -3.981 | -3.506 | -3.468 | -4.981 | -4.981 | 320158    | ZMAT4    | NM_177086_8_+1  |

|               |        |        |        |        |        |        |        |        |        |        |        |           |                  |
|---------------|--------|--------|--------|--------|--------|--------|--------|--------|--------|--------|--------|-----------|------------------|
| Cep95         | 3.312  | 3.135  | 3.251  | 3.028  | 3.514  | 3.614  | 3.231  | 3.115  | 2.844  | 3.039  | 320162 | CEP95     | NM_177088_11_+_1 |
| Tacc1         | 5.362  | 5.123  | 5.287  | 4.949  | 5.791  | 5.473  | 5.104  | 5.009  | 5.671  | 5.404  | 320165 | TACC1     | NM_177089_8_-_1  |
| Fndc7         | -0.116 | -3.723 | 7.028  | 7.254  | 3.434  | 3.493  | 3.603  | 3.447  | -1.223 | -1.068 | 320181 | FNDCC7    | NM_177091_3_-_1  |
| Msrb3         | -3.349 | -4.981 | -1.701 | -2.024 | -2.863 | -2.738 | -2.897 | -1.780 | -2.119 | -3.098 | 320183 | MSRB3     | NM_177092_10_-_1 |
| Lrrc58        | 5.222  | 5.268  | 5.847  | 5.627  | 5.501  | 5.439  | 5.515  | 5.524  | 6.018  | 6.120  | 320184 | LRRCS8    | NM_177093_16_+_1 |
| Etfbkmt       | 1.360  | 1.920  | 1.068  | 0.151  | 0.801  | 1.341  | 0.918  | 1.520  | 2.614  | 2.155  | 320204 | ETFBKMT   | NM_177101_6_+_1  |
| Tmem91        | -2.268 | -4.981 | -4.384 | -4.128 | -1.761 | -1.372 | -3.573 | -4.939 | -3.571 | -4.981 | 320208 | TMEM91    | NM_177102_7_-_1  |
| Senp5         | 3.606  | 3.945  | 4.275  | 4.297  | 4.150  | 4.293  | 4.292  | 4.099  | 4.413  | 4.628  | 320213 | SENP5     | NM_177103_16_-_1 |
| Ccdc66        | 3.419  | 3.754  | 3.023  | 3.430  | 3.789  | 4.224  | 2.992  | 3.267  | 1.797  | 2.605  | 320234 | CCDC66    | NM_177111_14_-_1 |
| March3        | -0.980 | 0.299  | -1.340 | -0.142 | -0.460 | 0.054  | -0.321 | 0.307  | -1.502 | 0.598  | 320253 | MARCH3    | NM_177115_18_-_1 |
| Dlec1         | -2.647 | -4.981 | -2.506 | -2.566 | -3.554 | -3.027 | -3.781 | -3.676 | -2.746 | -3.853 | 320256 | DLEC1     | NM_177117_9_+_1  |
| Spef2         | 0.769  | -0.465 | -3.697 | -4.906 | -2.336 | -0.962 | -4.914 | -4.213 | -3.211 | -2.770 | 320277 | SPEF2     | NM_177123_15_-_1 |
| Tnrc6b        | 2.506  | 2.600  | 1.480  | 1.548  | 2.892  | 2.242  | 2.483  | 2.416  | 3.367  | 2.762  | 213988 | TNRC6B    | NM_177124_15_+_1 |
| Iqcb1         | 4.117  | 4.314  | 3.534  | 3.816  | 3.159  | 3.090  | 2.411  | 2.867  | 0.805  | 0.511  | 320299 | IQCB1     | NM_177128_16_+_1 |
| Cntn2         | -4.981 | -1.940 | -3.301 | -4.093 | -3.124 | -4.443 | -2.917 | -4.444 | -2.939 | -2.537 | 21367  | CNTN2     | NM_177129_1_-_1  |
| Glt28d2       | -4.981 | -4.981 | -3.582 | -3.014 | -3.830 | -3.229 | -4.807 | -4.704 | -4.981 | -4.981 | 320302 | NA        | NM_177130_3_-_1  |
| Gnal          | -2.824 | -2.324 | -2.928 | -3.432 | -3.866 | -4.435 | -3.317 | -4.142 | -2.790 | -3.094 | 14680  | GNAL      | NM_177137_18_+_1 |
| Tmem251       | 6.774  | 6.625  | 5.833  | 5.721  | 5.528  | 5.593  | 5.572  | 5.709  | 4.948  | 5.079  | 320351 | TMEM251   | NM_177140_12_+_1 |
| Cenpt         | 2.262  | 2.157  | 2.801  | 2.856  | 2.661  | 2.808  | 2.237  | 3.065  | 1.592  | 2.145  | 320394 | CENPT     | NM_177150_8_-_1  |
| Vps13b        | 5.174  | 4.862  | 5.538  | 5.393  | 5.552  | 5.096  | 5.527  | 4.955  | 5.761  | 5.367  | 666173 | VPS13B    | NM_177151_15_+_1 |
| Lrig3         | -1.534 | -0.881 | -2.472 | -1.128 | -1.829 | -1.819 | -1.388 | -1.431 | 0.190  | 1.176  | 320398 | LRIG3     | NM_177152_10_+_1 |
| Klri2         | 2.305  | 4.908  | 3.065  | 2.428  | 5.615  | 6.848  | 4.889  | 3.583  | 0.227  | -0.285 | 320407 | NA        | NM_177155_6_-_1  |
| Gchfr         | -0.499 | 3.673  | -2.592 | 0.269  | -1.621 | 1.066  | -2.493 | 0.327  | -2.066 | -1.533 | 320415 | GCHFR     | NM_177157_2_+_1  |
| Rinl          | 4.567  | 4.223  | 5.812  | 5.967  | 5.833  | 5.988  | 5.426  | 5.333  | 5.070  | 4.900  | 320435 | RINL      | NM_177158_7_+_1  |
| Ppm1e         | 3.398  | 4.323  | -0.733 | -0.289 | -2.149 | -1.701 | -0.600 | -1.241 | -2.246 | -1.979 | 320472 | PPM1E     | NM_177167_11_-_1 |
| Heatrs5a      | 1.907  | 2.227  | 4.015  | 3.534  | 4.197  | 3.417  | 5.110  | 4.673  | 5.418  | 4.942  | 320487 | HEATR5A   | NM_177171_12_-_1 |
| A830018L16Rik | -4.981 | -4.981 | -4.960 | -4.960 | -4.908 | -3.067 | -4.977 | -4.979 | -4.981 | -4.981 | 320492 | C8orf34   | NM_177173_1_+_1  |
| Tmem215       | -4.981 | -4.981 | -4.977 | -4.977 | -4.978 | -4.978 | -4.945 | -4.905 | -4.981 | -4.981 | 320500 | TMEM215   | NM_177175_4_+_1  |
| Lmbrd2        | 0.886  | 1.884  | 1.513  | 1.340  | 1.330  | 1.368  | 0.758  | 1.290  | 0.158  | 2.040  | 320506 | LMBRD2    | NM_177178_15_+_1 |
| Vps13c        | 3.293  | 3.191  | 3.398  | 3.422  | 3.428  | 3.480  | 4.014  | 4.363  | 5.128  | 5.401  | 320528 | VPS13C    | NM_177184_9_+_1  |
| Ubn2          | 5.700  | 5.799  | 6.207  | 6.010  | 5.805  | 5.705  | 5.510  | 5.446  | 5.515  | 5.623  | 320538 | UBN2      | NM_177185_6_+_1  |
| Slc35e2       | 4.694  | 4.633  | 4.069  | 4.003  | 4.271  | 4.187  | 3.914  | 3.725  | 3.097  | 3.063  | 320541 | SLC35E2B  | NM_177186_4_+_1  |
| Tcp11l1       | 0.614  | -0.386 | 2.532  | 1.796  | 3.017  | 1.348  | 2.858  | 2.144  | 2.699  | 2.698  | 320554 | TCP11L1   | NM_177190_2_-_1  |
| Sycp2         | -2.842 | -3.267 | -3.470 | -2.508 | -4.528 | -3.575 | -3.379 | -4.286 | -3.750 | -3.855 | 320558 | SYCP2     | NM_177191_2_-_1  |
| Dennd5b       | 3.909  | 4.067  | 5.085  | 4.972  | 5.212  | 5.492  | 5.074  | 5.120  | 3.437  | 3.445  | 320560 | DENND5B   | NM_177192_6_-_1  |
| Atp8b5        | -4.981 | -4.981 | -4.610 | -4.964 | -4.651 | -4.413 | -2.986 | -3.136 | -4.981 | -4.227 | 320571 | NA        | NM_177195_4_+_1  |
| Idi2          | -4.981 | -4.981 | -2.162 | -3.158 | -3.453 | -4.530 | -2.545 | -4.879 | -4.981 | -3.758 | 320581 | NA        | NM_177197_13_+_1 |
| Svopl         | -2.573 | -4.981 | -3.812 | -4.670 | -2.397 | -3.371 | -3.016 | -3.299 | -3.738 | -4.175 | 320590 | SVOPL     | NM_177200_6_-_1  |
| Phf8          | 0.623  | -1.126 | -0.202 | -1.928 | 0.578  | -1.082 | 0.775  | 0.391  | 1.697  | 1.585  | 320595 | PHF8      | NM_177201_X_+_1  |
| Ccdc169       | -4.587 | -4.981 | -4.869 | -4.949 | -4.922 | -4.954 | -4.981 | -4.980 | -4.981 | -4.981 | 320604 | CCDC169   | NM_177203_3_+_1  |
| Strip2        | -2.795 | -3.120 | 5.033  | 5.316  | 2.221  | 0.717  | 1.305  | 0.937  | -1.591 | -0.340 | 320609 | STRIP2    | NM_177204_6_+_1  |
| 9430015G10Rik | 0.090  | 2.218  | 1.551  | -0.445 | 1.975  | 1.684  | 1.792  | 0.731  | 0.626  | -0.056 | 230996 | C1orf159  | NM_177205_4_+_1  |
| Dopey1        | 2.931  | 3.068  | 4.656  | 4.098  | 4.301  | 4.356  | 4.148  | 4.046  | 4.416  | 4.576  | 320615 | DOPEY1    | NM_177208_9_+_1  |
| Snrrnp200     | 5.561  | 5.468  | 6.126  | 6.198  | 6.470  | 6.296  | 6.400  | 6.322  | 6.595  | 6.625  | 320632 | SNRRNP200 | NM_177214_2_+_1  |
| Ocrl          | 1.268  | 1.692  | 1.561  | 1.747  | 1.204  | 1.465  | 2.707  | 2.901  | 4.294  | 4.462  | 320634 | OCRL      | NM_177215_X_+_1  |
| Cyb5r2        | -2.729 | -4.981 | -3.742 | -4.010 | -4.310 | -4.742 | -4.966 | -4.920 | -4.981 | -3.969 | 320635 | CYB5R2    | NM_177216_7_-_1  |
| Cep250        | 2.918  | 1.631  | 2.460  | 0.757  | 1.735  | 1.857  | 1.838  | 1.331  | 3.186  | 1.457  | 16328  | CEP250    | NM_177217_2_+_1  |
| Casc1         | -2.573 | -3.219 | -2.488 | -2.994 | -3.099 | -3.510 | -4.289 | -4.796 | -4.394 | -4.981 | 320662 | CASC1     | NM_177222_6_-_1  |
| Chd9          | 6.124  | 6.279  | 6.122  | 6.068  | 6.816  | 7.278  | 6.019  | 5.986  | 5.221  | 5.649  | 109151 | CHD9      | NM_177224_8_+_1  |
| Zfp629        | 1.711  | 2.502  | 2.869  | 2.870  | 3.019  | 3.027  | 2.675  | 2.130  | 2.442  | 2.499  | 320683 | ZNF629    | NM_177226_7_-_1  |
| Ncor1         | 5.954  | 6.115  | 6.100  | 6.008  | 6.400  | 6.441  | 5.807  | 5.776  | 5.487  | 5.297  | 20185  | NCOR1     | NM_177229_11_-_1 |
| Ccdc158       | -4.981 | -4.981 | -1.609 | -2.273 | -2.093 | -3.442 | -1.323 | -2.854 | -2.390 | -2.271 | 320696 | CCDC158   | NM_177230_5_-_1  |
| Arrb1         | -0.769 | 0.314  | 1.919  | 2.723  | 0.094  | 0.471  | 2.123  | 2.649  | 2.349  | 3.842  | 109689 | ARRB1     | NM_177231_7_+_1  |
| Bend6         | -1.136 | -2.585 | -3.833 | -2.002 | -2.240 | -0.498 | -2.024 | -0.327 | -4.821 | -0.025 | 320705 | BEND6     | NM_177235_1_-_1  |
| Mysm1         | 5.311  | 5.450  | 5.512  | 5.283  | 5.823  | 5.774  | 5.374  | 5.304  | 5.050  | 5.071  | 320713 | MYSM1     | NM_177239_4_-_1  |
| Trappc11      | 4.031  | 4.275  | 5.055  | 4.909  | 4.783  | 4.898  | 4.796  | 4.918  | 5.579  | 5.586  | 320714 | TRAPPC11  | NM_177240_8_-_1  |
| Pptc7         | 5.805  | 5.537  | 5.975  | 5.420  | 5.563  | 5.410  | 5.682  | 5.252  | 6.176  | 5.586  | 320717 | PPTC7     | NM_177242_5_+_1  |
| Slc26a9       | -1.003 | -0.507 | -4.794 | -4.934 | -4.981 | -4.981 | -4.968 | -4.975 | -4.981 | -4.981 | 320718 | SLC26A9   | NM_177243_1_+_1  |
| Fastkd1       | 3.080  | 2.727  | 2.287  | 0.647  | 1.770  | 0.240  | 1.739  | 0.733  | 2.189  | 0.696  | 320720 | FASTKD1   | NM_177244_2_-_1  |
| Usp47         | 1.661  | 0.875  | 2.414  | 2.273  | 0.764  | 2.269  | 1.947  | 2.133  | 2.014  | 2.892  | 74996  | USP47     | NM_177249_7_+_1  |
| Lingo4        | -4.981 | -4.981 | -4.981 | -4.981 | -2.922 | -0.017 | -2.329 | -1.822 | -3.242 | -4.981 | 320747 | LINGO4    | NM_177250_3_+_1  |
| Cstf3         | 2.825  | 3.643  | 2.932  | 2.846  | 2.758  | 3.025  | 2.782  | 2.705  | 1.349  | 2.386  | 228410 | CSTF3     | NM_177253_2_+_1  |
| Prdx6b        | -4.981 | -4.981 | -3.838 | -4.339 | -4.913 | -4.913 | -4.678 | -4.969 | -4.981 | -4.981 | 320769 | NA        | NM_177256_2_+_1  |
| Tmem154       | 5.642  | 4.253  | 3.156  | 3.551  | 2.763  | 4.286  | 3.557  | 4.094  | 5.739  | 5.347  | 320782 | TMEM154   | NM_177260_3_+_1  |
| Kndc1         | -4.981 | -4.981 | -3.743 | -0.630 | 0.766  | -0.194 | -1.699 | -3.720 | -4.981 | -4.981 | 76484  | KNDC1     | NM_177261_7_+_1  |
| Pkn1          | 5.074  | 5.252  | 5.459  | 5.583  | 6.137  | 6.488  | 6.020  | 6.039  | 6.734  | 6.895  | 320795 | PKN1      | NM_177262_8_-_1  |
| Zhx3          | 2.715  | 3.108  | 1.006  | 1.743  | 1.536  | 1.309  | 0.856  | 1.024  | 0.873  | 1.407  | 320799 | ZHX3      | NM_177263_2_-_1  |
| Ifitm10       | 0.014  | -2.895 | -3.683 | -3.382 | -3.563 | -3.418 | -2.711 | -1.968 | -2.065 | -4.227 | 320802 | NA        | NM_177265_7_-_1  |
| Gfm2          | 2.804  | 2.956  | 3.414  | 3.645  | 3.407  | 3.790  | 3.338  | 3.506  | 2.996  | 3.279  | 320806 | GFM2      | NM_177266_13_+_1 |
| Dcaf5         | 4.228  | 4.290  | 4.556  | 4.282  | 4.659  | 4.811  | 4.438  | 4.452  | 5.299  | 5.151  | 320808 | DCAF5     | NM_177267_12_-_1 |
| Ankrd16       | 3.849  | 4.317  | 4.277  | 4.405  | 4.353  | 4.453  | 4.342  | 4.304  | 4.606  | 4.674  | 320816 | ANKRD16   | NM_177268_2_+_1  |
| Cdkl2         | -4.981 | -1.249 | -1.881 | -2.057 | -2.522 | -1.146 | -3.842 | -4.786 | -1.307 | -0.668 | 53886  | CDKL2     | NM_177270_5_-_1  |
| Samd5         | -4.981 | -4.981 | -1.465 | -2.552 | -4.981 | -4.981 | -4.964 | -4.552 | -4.981 | -4.981 | 320825 | SAMD5     | NM_177271_10_-_1 |
| Negr1         | -3.668 | -1.786 | -4.697 | -4.965 | -3.165 | -2.895 | -2.872 | -4.435 | -2.409 | -4.981 | 320840 | NEGR1     | NM_177274_3_+_1  |

|               |        |        |        |        |        |        |        |        |        |        |        |          |                 |
|---------------|--------|--------|--------|--------|--------|--------|--------|--------|--------|--------|--------|----------|-----------------|
| Amigo3        | 2.070  | 1.049  | 1.883  | 1.578  | 1.567  | 0.850  | 0.795  | 0.232  | 1.887  | 1.853  | 320844 | AMIGO3   | NM_177275_9_+1  |
| L3mbtl4       | -4.981 | -4.981 | -4.938 | -3.809 | 0.071  | 5.351  | -3.280 | -0.226 | -4.981 | -4.981 | 320858 | L3MBTL4  | NM_177278_17_+1 |
| Spata33       | -3.668 | -4.981 | -4.327 | -4.952 | -4.738 | -4.961 | -4.976 | -4.900 | -4.981 | -3.853 | 320869 | SPATA33  | NM_177279_8_+1  |
| Mical2        | -2.625 | -4.981 | 2.275  | 2.418  | 2.402  | 1.904  | 1.194  | 0.844  | 0.729  | 1.855  | 320878 | MICAL2   | NM_177282_7_+1  |
| Nrxn1         | -4.981 | -2.787 | -4.962 | -4.008 | -1.797 | -1.268 | -4.981 | -4.981 | -4.981 | -4.981 | 18189  | NRXN1    | NM_177284_17_-1 |
| Cbfa2t3       | 3.748  | 3.951  | 4.735  | 4.878  | 5.046  | 4.844  | 5.371  | 4.722  | 4.039  | 4.308  | 12398  | CBFA2T3  | NM_177289_8_-1  |
| Itgb8         | -4.981 | -4.981 | -4.809 | -3.459 | -4.684 | -3.457 | -4.377 | -3.190 | -4.981 | -4.981 | 320910 | ITGB8    | NM_177290_12_-1 |
| Mtap7d3       | 1.266  | 2.468  | -1.725 | -1.898 | 0.825  | 1.367  | 0.409  | 1.528  | 1.789  | 2.044  | 320923 | MAP7D3   | NM_177293_X_-1  |
| Rpap1         | -2.041 | 2.138  | 0.284  | 0.726  | -0.090 | 0.966  | -1.032 | 2.526  | 0.648  | 2.294  | 68925  | RPAP1    | NM_177294_2_-1  |
| Tnpo3         | 4.710  | 4.712  | 5.974  | 5.785  | 5.603  | 5.349  | 5.589  | 5.614  | 5.935  | 6.071  | 320938 | TNPO3    | NM_177296_6_-1  |
| Pisd          | 5.177  | 5.110  | 6.201  | 6.228  | 5.163  | 5.256  | 6.136  | 6.316  | 7.480  | 7.335  | 320951 | PISD     | NM_177298_5_-1  |
| Hnrnpl        | 6.262  | 6.030  | 6.367  | 6.362  | 6.836  | 6.636  | 6.489  | 6.434  | 6.802  | 6.647  | 15388  | HNRNPL   | NM_177301_7_+1  |
| Enpp6         | -4.981 | -4.981 | -4.975 | -4.862 | -4.559 | -3.409 | -4.527 | -2.902 | -3.242 | -4.981 | 320981 | ENPP6    | NM_177304_8_+1  |
| Arl4c         | 1.536  | 0.509  | 3.671  | 2.894  | 6.108  | 5.418  | 5.771  | 5.056  | 4.862  | 5.162  | 320982 | ARL4C    | NM_177305_1_-1  |
| Cyp4f39       | -4.981 | -4.981 | -4.877 | -4.877 | -3.484 | -4.836 | -4.949 | -4.965 | -4.981 | -4.981 | 320997 | CYP4F22  | NM_177307_17_+1 |
| Xpnp3         | 1.707  | 2.198  | 1.997  | 1.181  | 2.244  | 1.713  | 1.807  | 2.074  | 2.819  | 2.725  | 321003 | NA       | NM_177310_15_+1 |
| Serac1        | 2.320  | 0.492  | 0.851  | -1.005 | -0.787 | -0.233 | -0.564 | -0.757 | 0.738  | 1.359  | 321007 | SERAC1   | NM_177311_17_-1 |
| 6330408A02Rik | 0.120  | 0.842  | -0.829 | 0.211  | -0.537 | -0.129 | -1.448 | -0.589 | 0.594  | 0.931  | 321008 | C19orf68 | NM_177312_7_-1  |
| Zfp653        | 2.738  | 3.298  | 2.817  | 2.668  | 2.848  | 2.961  | 2.710  | 2.868  | 3.464  | 3.281  | 319601 | ZNF653   | NM_177318_9_-1  |
| Zfyve27       | 2.955  | 2.329  | 2.874  | 2.415  | 2.825  | 3.325  | 2.479  | 2.579  | 3.275  | 2.911  | 319740 | ZFYVE27  | NM_177319_19_+1 |
| Pik3r5        | 4.986  | 4.945  | 6.312  | 6.066  | 6.846  | 6.815  | 6.475  | 6.374  | 7.290  | 7.174  | 320207 | PIK3R5   | NM_177320_11_+1 |
| Agtr1a        | -4.981 | -0.697 | -2.945 | -0.791 | -4.961 | -0.562 | -2.407 | -0.300 | -4.981 | -3.855 | 11607  | AGTR1    | NM_177322_13_+1 |
| Rint1         | 3.715  | 3.456  | 2.945  | 3.028  | 2.888  | 3.449  | 2.790  | 3.231  | 2.824  | 3.330  | 72772  | RINT1    | NM_177323_5_+1  |
| Sbf2          | 2.245  | 1.815  | 3.850  | 3.627  | 4.042  | 3.411  | 3.570  | 3.367  | 2.251  | 3.280  | 319934 | SBF2     | NM_177324_7_-1  |
| Tsr1          | 4.440  | 4.505  | 5.154  | 5.267  | 4.590  | 4.503  | 4.282  | 4.538  | 3.495  | 3.292  | 104662 | TSR1     | NM_177325_11_+1 |
| Pak2          | 5.898  | 6.134  | 7.048  | 6.953  | 7.216  | 7.205  | 7.253  | 7.025  | 7.252  | 7.562  | 224105 | PAK2     | NM_177326_16_-1 |
| Wwp1          | 2.764  | 3.249  | 2.798  | 2.749  | 2.824  | 2.846  | 2.210  | 2.694  | 4.114  | 3.940  | 107568 | WWP1     | NM_177327_4_-1  |
| Gen1          | -0.268 | 0.712  | -0.358 | -0.224 | 0.581  | 0.221  | 0.631  | 0.150  | -0.302 | 0.065  | 209334 | GEN1     | NM_177331_12_-1 |
| Exoc3         | 5.835  | 6.193  | 5.961  | 6.098  | 6.511  | 6.713  | 6.220  | 6.238  | 6.095  | 6.484  | 211446 | EXOC3    | NM_177333_13_-1 |
| D930020B18Rik | -4.981 | -4.981 | -4.932 | -3.563 | -0.925 | -0.239 | -3.440 | -2.338 | -4.981 | -4.981 | 216393 | C12orf56 | NM_177335_10_+1 |
| Arl11         | 4.762  | 4.941  | 3.022  | 3.384  | 3.573  | 3.729  | 4.935  | 4.894  | 5.590  | 5.447  | 219144 | ARL11    | NM_177337_14_+1 |
| Hmbox1        | 2.522  | 2.674  | 3.200  | 2.944  | 2.957  | 3.227  | 2.455  | 2.288  | 2.952  | 2.876  | 219150 | HMBOX1   | NM_177338_14_-1 |
| Synpo         | -3.121 | -0.896 | 2.467  | 0.246  | -3.474 | -4.804 | -3.870 | -2.364 | -4.190 | -4.966 | 104027 | SYNPO    | NM_177340_18_-1 |
| Trpm3         | -4.981 | -4.981 | -4.981 | -4.981 | -3.651 | -4.821 | -4.981 | -4.981 | -2.659 | -4.981 | 226025 | TRPM3    | NM_177341_19_+1 |
| Taf5          | 3.882  | 3.299  | 3.344  | 2.977  | 3.366  | 3.198  | 3.456  | 3.480  | 4.130  | 3.885  | 226182 | TAFA5    | NM_177342_19_+1 |
| Camk1d        | 4.673  | 5.875  | 7.396  | 6.235  | 5.535  | 5.568  | 5.812  | 5.922  | 6.710  | 6.182  | 227541 | CAMK1D   | NM_177343_2_-1  |
| Tmem203       | 5.289  | 4.943  | 4.122  | 3.914  | 3.967  | 3.986  | 4.324  | 4.085  | 4.036  | 3.836  | 227615 | TMEM203  | NM_177344_2_+1  |
| Mapkap1       | 5.390  | 5.539  | 5.869  | 5.922  | 5.705  | 5.611  | 5.700  | 5.713  | 5.452  | 5.203  | 227743 | MAPKAP1  | NM_177345_2_+1  |
| Gpr149        | -2.842 | -4.981 | -4.507 | -2.985 | -4.871 | -4.007 | -4.246 | -0.597 | -2.834 | -2.239 | 229357 | GPR149   | NM_177346_3_-1  |
| Hykk          | -1.062 | -0.381 | -2.526 | -1.784 | -0.516 | -0.823 | -2.698 | -2.061 | -2.167 | -3.027 | 235386 | HYKK     | NM_177351_9_+1  |
| Gk5           | -0.962 | 0.791  | -0.164 | -1.061 | -0.400 | -0.946 | -1.539 | -0.815 | -0.373 | 0.561  | 235533 | GK5      | NM_177352_9_+1  |
| Slc9a7        | 3.654  | 3.767  | 5.092  | 4.856  | 3.948  | 3.894  | 3.386  | 3.953  | 2.939  | 3.230  | 236727 | SLC9A7   | NM_177353_X_-1  |
| Vash1         | -0.328 | -1.055 | -4.981 | -4.981 | -2.941 | -4.981 | -3.427 | -4.972 | -4.981 | -2.954 | 238328 | VASH1    | NM_177354_12_+1 |
| Lamp3         | -0.772 | -4.981 | -4.970 | -4.970 | -4.966 | -3.002 | -4.972 | -2.778 | -4.981 | -4.981 | 239739 | LAMP3    | NM_177356_16_-1 |
| Kalrn         | -3.349 | -3.408 | -3.250 | -0.740 | -2.540 | -2.546 | -2.119 | -2.746 | -1.032 | -1.448 | 545156 | KALRN    | NM_177357_16_-1 |
| Zfp945        | 3.787  | 3.797  | 2.927  | 3.356  | 2.477  | 3.041  | 2.529  | 3.197  | 2.615  | 1.956  | 240041 | NA       | NM_177358_17_-1 |
| Zfp799        | 3.302  | 3.306  | 2.935  | 3.274  | 3.137  | 3.968  | 2.579  | 3.406  | 2.675  | 3.336  | 240064 | ZNF799   | NM_177359_17_-1 |
| Zfp771        | 4.660  | 4.478  | 4.198  | 4.215  | 3.470  | 3.487  | 3.563  | 3.673  | 3.602  | 3.217  | 244216 | ZNF771   | NM_177362_7_+1  |
| Tarm1         | -4.981 | -4.981 | -2.507 | -3.389 | 1.772  | 1.871  | 3.720  | 3.021  | 3.233  | 2.860  | 245126 | TARM1    | NM_177363_7_-1  |
| Sh3pxd2b      | -1.987 | -2.137 | 5.178  | 4.574  | -1.420 | -2.032 | 2.279  | 2.498  | 2.909  | 2.787  | 268396 | SH3PXD2B | NM_177364_11_+1 |
| Gpr157        | 3.011  | 1.959  | 4.838  | 5.398  | 3.913  | 3.291  | 2.648  | 2.248  | 0.406  | 1.556  | 269604 | GPR157   | NM_177366_4_+1  |
| Gemin4        | 2.044  | 1.535  | 1.956  | 1.977  | 2.116  | 1.933  | 2.167  | 1.976  | 2.385  | 1.991  | 276919 | GEMIN4   | NM_177367_11_-1 |
| Tmtc2         | 0.763  | 0.470  | 1.451  | 0.917  | 1.200  | 1.126  | 0.283  | -0.424 | -3.925 | -2.001 | 278279 | TMTC2    | NM_177368_10_-1 |
| Rhbdd3        | 3.113  | 1.777  | 1.957  | 1.841  | 0.442  | 0.179  | 1.039  | -0.944 | 0.849  | 1.600  | 279766 | RHBDD3   | NM_177370_11_+1 |
| Tnfsf15       | -4.981 | -4.981 | 0.026  | -0.173 | 0.823  | 0.515  | 1.560  | 0.940  | -1.232 | 0.074  | 326623 | TNFSF15  | NM_177371_4_-1  |
| Dna2          | -1.164 | -2.616 | 5.645  | 5.180  | 6.145  | 5.919  | 6.292  | 6.067  | 7.153  | 7.007  | 327762 | DNA2     | NM_177372_10_+1 |
| Trmt61a       | 1.156  | 0.081  | 1.844  | 1.389  | 1.345  | 0.360  | 2.365  | 0.521  | 2.378  | 1.305  | 328162 | TRMT61A  | NM_177374_12_+1 |
| Rab26         | -3.090 | -0.605 | 1.282  | 4.076  | 1.885  | 2.596  | -0.283 | -0.475 | -4.981 | -4.981 | 328778 | RAB26    | NM_177375_17_-1 |
| Myo3b         | -2.071 | -4.981 | -2.296 | -3.905 | -2.871 | -2.027 | -3.611 | -4.292 | -4.190 | -4.981 | 329421 | MYO3B    | NM_177376_2_+1  |
| Fam166b       | -4.981 | -4.981 | -4.956 | -4.545 | -4.972 | -4.806 | -4.979 | -4.977 | -4.981 | -4.981 | 329831 | FAM166B  | NM_177377_4_-1  |
| Rnf150        | -2.483 | -2.600 | 4.294  | 3.288  | 3.513  | 4.891  | 3.520  | 3.818  | 1.815  | 0.998  | 330812 | RNF150   | NM_177378_8_+1  |
| Arhgap32      | -0.634 | -0.148 | -3.198 | -2.373 | -3.470 | -4.411 | -2.649 | -1.760 | -4.532 | -4.487 | 330914 | ARHGAP32 | NM_177379_9_+1  |
| Cog3          | 4.184  | 4.363  | 4.734  | 4.459  | 4.540  | 4.582  | 4.417  | 4.671  | 5.098  | 5.233  | 338337 | COG3     | NM_177381_14_-1 |
| Cyp2r1        | 2.067  | 1.109  | 1.856  | 0.014  | 1.656  | -0.382 | 1.894  | 0.258  | 1.493  | -1.171 | 244209 | CYP2R1   | NM_177382_7_-1  |
| Gpr21         | -2.413 | -3.267 | -2.293 | -3.979 | -1.861 | -2.104 | -2.585 | -3.071 | -2.614 | -1.263 | 338346 | GPR21    | NM_177383_2_+1  |
| Ttc16         | -4.774 | -4.499 | -4.938 | -4.938 | -4.956 | -4.979 | -4.981 | -4.980 | -4.981 | -4.895 | 338348 | TTC16    | NM_177384_2_-1  |
| Cntln         | -0.939 | -2.740 | 0.029  | 0.758  | 0.639  | 1.019  | 0.487  | -0.914 | -2.417 | -1.240 | 338349 | CNTLN    | NM_177385_4_+1  |
| Sfmbt2        | -4.981 | -3.176 | -4.951 | -3.510 | -1.984 | -0.393 | -2.664 | -2.758 | -4.254 | -0.835 | 353282 | SFMBT2   | NM_177386_2_+1  |
| Ust           | 1.708  | 0.642  | 4.023  | 3.779  | 2.630  | 0.703  | 2.922  | 3.160  | 0.870  | 1.402  | 338362 | UST      | NM_177387_10_-1 |
| Slc41a2       | 6.820  | 7.107  | 3.560  | 3.658  | -1.091 | 0.979  | -1.455 | 1.096  | -0.315 | 0.094  | 338365 | SLC41A2  | NM_177388_10_-1 |
| Mia3          | 5.908  | 5.894  | 6.090  | 6.215  | 6.036  | 6.098  | 5.976  | 5.952  | 6.454  | 6.613  | 338366 | MIA3     | NM_177389_1_-1  |
| Myo1d         | -4.981 | -2.997 | -3.319 | 1.705  | -4.333 | 0.221  | 0.508  | 1.599  | -0.949 | -0.212 | 338367 | MYO1D    | NM_177390_11_-1 |
| Fam109b       | 0.603  | -0.145 | 1.531  | 1.484  | 1.078  | 1.558  | 2.527  | 2.253  | 3.146  | 2.419  | 338368 | FAM109B  | NM_177391_15_+1 |
| Tmem220       | -4.689 | -4.398 | -4.379 | -3.462 | -4.659 | -4.900 | -4.585 | -4.868 | -4.755 | -4.844 | 338369 | TMEM220  | NM_177392_11_+1 |

|               |        |        |        |        |        |        |        |        |        |        |        |                  |                  |
|---------------|--------|--------|--------|--------|--------|--------|--------|--------|--------|--------|--------|------------------|------------------|
| Endov         | 1.285  | 2.298  | 1.016  | 1.126  | 0.352  | 0.965  | 1.806  | 0.534  | 0.550  | 2.201  | 338371 | ENDOV            | NM_177394_11_+_1 |
| Map3k9        | -3.401 | -3.054 | -0.716 | -2.207 | -1.207 | -3.773 | -4.206 | -3.367 | -2.407 | -0.390 | 338372 | MAP3K9           | NM_177395_12_+_1 |
| Ifnl3         | -4.981 | -4.981 | -4.953 | -4.953 | -4.973 | -4.973 | -4.981 | -4.981 | -4.981 | -4.981 | 338374 | IFNL3            | NM_177396_7_+_1  |
| Atp6v1g3      | -4.981 | -1.086 | -4.969 | -3.705 | -4.182 | -4.822 | -4.521 | -4.816 | -3.738 | -4.981 | 338375 | ATP6V1G3         | NM_177397_1_+_1  |
| Camk2a        | -4.981 | -4.852 | -4.884 | -4.966 | -4.979 | -4.979 | -4.887 | -4.968 | -4.981 | -4.968 | 12322  | CAMK2A           | NM_177407_18_+_1 |
| Tram2         | 1.864  | 2.217  | 0.922  | 1.853  | 0.076  | 1.606  | 0.574  | 2.240  | 1.081  | 2.458  | 170829 | TRAM2            | NM_177409_1_+_1  |
| Bcl2          | 1.834  | 2.600  | 2.529  | 2.997  | 3.312  | 3.397  | 4.167  | 4.277  | 4.363  | 3.241  | 12043  | BCL2             | NM_177410_1_+_1  |
| Rab5b         | 3.838  | 3.556  | 4.620  | 4.290  | 5.039  | 4.661  | 4.897  | 3.845  | 5.941  | 5.110  | 19344  | RAB5B            | NM_177411_10_+_1 |
| Tmcc1         | 2.647  | 2.713  | 3.421  | 2.878  | 3.267  | 3.083  | 4.794  | 4.848  | 7.117  | 7.011  | 330401 | TMCC1            | NM_177412_6_+_1  |
| Psat1         | 3.962  | 3.318  | 3.948  | 4.137  | 3.543  | 3.037  | 3.322  | 3.561  | 2.953  | 2.353  | 107272 | PSAT1            | NM_177420_19_+_1 |
| Ofd1          | 3.436  | 3.671  | 3.878  | 3.904  | 3.934  | 3.859  | 3.431  | 3.320  | 2.957  | 3.018  | 237222 | OFD1             | NM_177429_X_+_1  |
| Dars          | 6.823  | 6.656  | 7.030  | 7.145  | 6.578  | 6.565  | 6.467  | 6.639  | 6.134  | 6.003  | 226414 | DARS             | NM_177445_1_+_1  |
| Mogat2        | -4.981 | -4.981 | -4.981 | -4.981 | -4.967 | -3.186 | -4.726 | -1.971 | 1.309  | -4.981 | 233549 | MOGAT2           | NM_177448_7_+_1  |
| Lrrc29        | 1.632  | 0.827  | 0.451  | 0.703  | 0.679  | 0.538  | 1.025  | 0.799  | 1.711  | 1.354  | 234684 | LRRC29           | NM_177449_8_+_1  |
| Cndp1         | -4.981 | -4.981 | -4.981 | -4.981 | -4.980 | -4.969 | -4.951 | -4.930 | -3.750 | -2.102 | 338403 | CNDP1            | NM_177450_18_+_1 |
| Parp16        | 1.884  | 2.540  | -1.020 | 0.253  | -1.734 | -0.299 | 0.318  | 1.062  | 1.334  | 0.821  | 214424 | PARP16           | NM_177460_9_+_1  |
| Mical1        | 3.454  | 3.340  | 4.203  | 4.250  | 3.974  | 3.832  | 3.392  | 3.479  | 3.368  | 3.185  | 27008  | MICALL1          | NM_177461_15_+_1 |
| Zmym6         | -2.451 | -2.204 | 0.973  | 0.366  | 0.285  | 1.522  | 1.088  | -0.184 | 2.247  | 1.510  | 100177 | ZMYM6            | NM_177462_4_+_1  |
| R3hcc1l       | 4.205  | 4.340  | 5.081  | 4.758  | 5.100  | 4.722  | 4.908  | 4.857  | 5.187  | 5.371  | 52013  | R3HCC1L          | NM_177464_19_+_1 |
| Umodl1        | -4.981 | -4.981 | -4.487 | -4.984 | -3.821 | -4.989 | -4.971 | -3.416 | -2.501 | -4.981 | 52020  | UMODL1           | NM_177465_17_+_1 |
| Rab11fip5     | 3.031  | 2.862  | 1.900  | 1.579  | 0.881  | 0.335  | 2.196  | 2.096  | 3.922  | 3.769  | 52055  | RAB11FIP5        | NM_177466_6_+_1  |
| Acaa2         | 5.576  | 6.180  | 5.166  | 5.620  | 5.094  | 5.757  | 5.807  | 6.468  | 6.977  | 7.016  | 52538  | ACAA2            | NM_177470_18_+_1 |
| Ccdc69        | 5.783  | 5.672  | 6.302  | 5.448  | 5.987  | 5.807  | 5.807  | 5.713  | 4.744  | 4.832  | 52570  | NA               | NM_177471_11_+_1 |
| Slx4          | 2.394  | 1.947  | 2.693  | 2.442  | 2.884  | 2.575  | 2.594  | 2.571  | 2.714  | 2.901  | 52864  | SLX4             | NM_177472_16_+_1 |
| Tmem191c      | 3.635  | 3.717  | 1.852  | 1.338  | 1.356  | 1.605  | 1.911  | 1.402  | 1.157  | 0.936  | 224019 | NA               | NM_177473_16_+_1 |
| Pum3          | 5.803  | 6.036  | 6.211  | 6.242  | 5.666  | 5.844  | 5.591  | 5.797  | 5.351  | 5.220  | 52874  | PUM3             | NM_177474_19_+_1 |
| Zfp280b       | 2.072  | 2.356  | 3.121  | 3.077  | 4.039  | 4.360  | 3.287  | 3.973  | 3.228  | 3.145  | 64453  | ZNF280B          | NM_177475_10_+_1 |
| Vangl1        | -2.178 | 1.138  | -4.955 | -0.868 | -4.558 | 0.952  | -3.187 | -0.091 | -4.981 | -2.609 | 229658 | VANGL1           | NM_177545_3_+_1  |
| Pcyt1b        | -4.981 | -4.981 | -2.414 | -1.380 | 0.833  | 2.425  | -0.094 | -0.325 | -1.559 | -1.284 | 236899 | PCYT1B           | NM_177546_X_+_1  |
| Sgk3          | 2.619  | 5.331  | 4.226  | 5.944  | 3.571  | 5.866  | 3.646  | 6.171  | 5.169  | 7.681  | 170755 | C8orf44-SGK3 SGK | NM_177547_1_+_1  |
| Usp46         | 2.977  | 3.026  | 2.794  | 2.868  | 1.663  | 2.373  | 2.447  | 2.869  | 2.825  | 2.868  | 69727  | USP46            | NM_177561_5_+_1  |
| Clec16a       | 0.089  | 0.113  | -2.168 | -2.952 | -2.848 | -3.046 | -3.341 | -3.843 | -1.021 | -1.681 | 74374  | CLEC16A          | NM_177562_16_+_1 |
| Dhrs11        | 4.099  | 4.121  | 3.439  | 4.120  | 3.031  | 3.970  | 3.130  | 4.117  | 3.551  | 3.620  | 192970 | DHRS11           | NM_177564_11_+_1 |
| Zfp3          | 3.772  | 2.805  | 3.100  | 3.154  | 3.237  | 3.463  | 2.458  | 2.468  | 2.190  | 1.854  | 193043 | ZFP3             | NM_177565_11_+_1 |
| Arhgef15      | -2.784 | -4.981 | -1.861 | -3.410 | -2.963 | -3.673 | -3.160 | -4.220 | -3.925 | -4.316 | 442801 | ARHGEF15         | NM_177566_11_+_1 |
| BC049762      | -1.853 | -1.131 | -1.681 | -2.686 | -4.424 | -4.499 | -4.777 | -3.800 | -3.471 | -2.733 | 193286 | NA               | NM_177567_11_+_1 |
| Plcb2         | 5.782  | 4.941  | 6.485  | 6.511  | 6.321  | 6.420  | 5.637  | 5.661  | 4.715  | 4.476  | 18796  | PLCB2            | NM_177568_2_+_1  |
| Slfnl1        | -4.981 | -4.981 | -4.982 | -4.056 | -4.868 | -4.186 | -4.597 | -4.887 | -4.981 | -3.498 | 194219 | SLFN1            | NM_177570_4_+_1  |
| Rimk1a        | -4.981 | -4.981 | -1.999 | -1.678 | -4.219 | -4.176 | -4.964 | -2.042 | -4.981 | -4.981 | 194237 | RIMK1A           | NM_177572_4_+_1  |
| 9930104L06Rik | 3.061  | 3.126  | 3.062  | 2.667  | 3.463  | 3.366  | 3.499  | 2.818  | 3.226  | 2.555  | 194268 | C1orf109         | NM_177573_4_+_1  |
| Vps37d        | -0.809 | -4.981 | -3.494 | -3.170 | -4.404 | -4.030 | -4.192 | -3.739 | -3.925 | -4.342 | 194309 | VPS37D           | NM_177574_5_+_1  |
| Skint3        | -4.981 | -4.981 | 0.949  | -4.799 | 4.736  | -4.869 | 6.679  | -4.746 | 5.113  | -4.981 | 195564 | NA               | NM_177578_4_+_1  |
| Baiap2l2      | -4.981 | -4.981 | -4.981 | -4.981 | -4.532 | -4.636 | -4.981 | -4.460 | -4.981 | -4.981 | 207495 | BAIAP2L2         | NM_177580_15_+_1 |
| Mlxip         | 4.885  | 4.909  | 4.956  | 4.746  | 4.750  | 4.687  | 4.212  | 4.559  | 4.794  | 4.222  | 208104 | MLXIP            | NM_177582_5_+_1  |
| Aph1b         | 2.769  | 3.285  | 4.581  | 4.491  | 3.245  | 3.029  | 3.744  | 3.782  | 4.594  | 4.732  | 208117 | APH1B            | NM_177583_9_+_1  |
| Btla          | 5.051  | 6.132  | 7.848  | 8.356  | 5.173  | 6.639  | 4.712  | 4.929  | 4.455  | 1.811  | 208154 | BTLA             | NM_177584_16_+_1 |
| Eif5a2        | 3.108  | 2.771  | 2.647  | 1.852  | 3.038  | 2.246  | 2.929  | 2.712  | 3.020  | 3.102  | 208691 | EIF5A2           | NM_177586_3_+_1  |
| Aqp12         | -4.174 | -4.981 | -4.415 | -4.446 | -3.785 | -4.721 | -3.323 | -4.417 | -2.848 | -4.177 | 208760 | AQP12A AQP12B    | NM_177587_1_+_1  |
| Thnsl1        | 2.994  | 3.243  | 2.400  | 2.249  | 2.846  | 2.956  | 1.782  | 1.981  | 2.001  | 2.545  | 208967 | THNSL1           | NM_177588_2_+_1  |
| Ulk4          | -0.677 | -4.981 | -0.769 | -2.755 | -0.721 | -1.965 | -1.174 | -2.717 | -3.531 | -3.209 | 209012 | ULK4             | NM_177589_9_+_1  |
| Tmem164       | 3.273  | 3.447  | 4.038  | 3.892  | 4.600  | 4.537  | 5.487  | 5.400  | 7.073  | 7.165  | 209497 | TMEM164          | NM_177592_X_+_1  |
| Gm4763        | -4.981 | -4.981 | -4.924 | -4.924 | -4.976 | -4.932 | -4.864 | -3.779 | -3.582 | 1.619  | 210155 | NA               | NM_177593_7_+_1  |
| Mtmr9         | 2.943  | 2.597  | 3.313  | 3.391  | 3.242  | 3.140  | 3.233  | 3.148  | 3.949  | 4.075  | 210376 | MTMR9            | NM_177594_14_+_1 |
| Zfp947        | 1.652  | 1.706  | -0.827 | -1.737 | -1.197 | -2.020 | 0.555  | -0.105 | 1.739  | 2.276  | 210853 | NA               | NM_177596_17_+_1 |
| Ccdc73        | -2.863 | -3.158 | -2.832 | -3.582 | -2.580 | -3.801 | -2.691 | -4.608 | -2.727 | -2.512 | 211936 | CCDC73           | NM_177600_2_+_1  |
| Tmem60        | 6.471  | 6.377  | 5.198  | 4.930  | 5.074  | 5.247  | 5.248  | 5.119  | 4.569  | 4.582  | 212090 | TMEM60           | NM_177601_5_+_1  |
| Wdr25         | 2.029  | 2.248  | 1.114  | 1.489  | 1.229  | 1.356  | 1.142  | 1.127  | 1.472  | 1.460  | 212198 | WDR25            | NM_177602_12_+_1 |
| Frat2         | 1.971  | 1.555  | 1.967  | 2.126  | 2.664  | 3.195  | 3.412  | 3.640  | 5.038  | 4.153  | 212398 | FRAT2            | NM_177603_19_+_1 |
| AA986860      | -1.798 | -0.922 | -2.850 | -2.866 | -2.943 | -1.262 | -1.723 | -1.978 | -1.153 | 0.068  | 212439 | C1orf116         | NM_177604_1_+_1  |
| Plekhh2       | 1.480  | 1.413  | -4.696 | -3.716 | -4.981 | -4.981 | -4.968 | -4.949 | -3.738 | -3.165 | 213556 | PLEKHH2          | NM_177606_17_+_1 |
| 4933430I17Rik | -1.185 | -1.905 | -1.380 | -0.207 | -3.089 | -3.469 | -2.089 | -2.682 | -4.981 | -3.498 | 214106 | C9orf43          | NM_177607_4_+_1  |
| Secisbp2l     | 5.967  | 6.165  | 6.045  | 6.129  | 5.835  | 5.819  | 5.581  | 5.695  | 5.856  | 5.827  | 70354  | SECISBP2L        | NM_177608_2_+_1  |
| Psd4          | 4.658  | 4.629  | 5.477  | 5.603  | 5.913  | 5.723  | 5.721  | 5.605  | 5.712  | 5.976  | 215632 | PSD4             | NM_177611_2_+_1  |
| Cdc34         | 5.403  | 5.212  | 5.243  | 5.286  | 5.299  | 5.195  | 5.332  | 5.193  | 5.337  | 4.818  | 216150 | CDC34            | NM_177613_10_+_1 |
| Os9           | 6.130  | 5.583  | 5.648  | 5.307  | 5.761  | 5.290  | 5.961  | 4.944  | 6.256  | 5.081  | 216440 | OS9              | NM_177614_10_+_1 |
| Slc26a10      | -2.925 | -4.981 | -2.946 | -3.533 | -1.084 | -2.851 | -2.022 | -3.151 | -0.837 | -1.378 | 216441 | NA               | NM_177615_10_+_1 |
| Ccdc157       | -3.387 | -2.983 | -4.174 | -4.561 | -4.555 | -4.885 | -4.221 | -4.633 | -3.783 | -4.120 | 216516 | CCDC157          | NM_177616_11_+_1 |
| Kat7          | -0.687 | -1.396 | -3.791 | -2.639 | -3.141 | -4.957 | -3.703 | -4.827 | 0.404  | -1.306 | 217127 | KAT7             | NM_177619_11_+_1 |
| Rin3          | -2.944 | 0.963  | 5.258  | 5.344  | 4.845  | 5.479  | 6.127  | 6.243  | 5.506  | 6.026  | 217835 | RIN3             | NM_177620_12_+_1 |
| Zfp595        | 2.496  | 2.229  | 2.274  | 1.938  | 2.655  | 2.140  | 2.475  | 1.387  | 2.091  | 2.527  | 218314 | ZNF595           | NM_177622_13_+_1 |
| Ttc5          | 3.127  | 2.984  | 3.985  | 2.675  | 3.671  | 3.360  | 3.131  | 2.985  | 3.370  | 3.090  | 219022 | TTCS             | NM_177625_14_+_1 |
| Fam167a       | -3.563 | -4.981 | -0.450 | -0.123 | 0.528  | 1.923  | -1.931 | -0.678 | -4.394 | -2.480 | 219148 | FAM167A          | NM_177628_14_+_1 |
| Ldoc1l        | 3.768  | 4.237  | 3.013  | 2.986  | 1.366  | 2.564  | 1.735  | 2.354  | 2.394  | 2.351  | 223732 | LDOC1L           | NM_177630_15_+_1 |
| BC048502      | -4.981 | -4.981 | -4.981 | -4.981 | -4.276 | -2.288 | -4.936 | -4.906 | -4.981 | -4.981 | 223927 | NA               | NM_177631_15_+_1 |

|               |               |        |        |        |        |        |        |        |        |        |        |            |                 |
|---------------|---------------|--------|--------|--------|--------|--------|--------|--------|--------|--------|--------|------------|-----------------|
| Fam43a        | 6.308         | 2.190  | 1.961  | 2.187  | 4.929  | 3.899  | 4.594  | 4.273  | 5.207  | 4.752  | 224093 | FAM43A     | NM_177632_16_+1 |
| Ubxn7         | 3.643         | 4.146  | 4.005  | 4.260  | 4.313  | 4.548  | 3.834  | 4.201  | 4.025  | 4.810  | 224111 | UBXN7      | NM_177633_16_+1 |
| Crb3          | -0.590        | -0.393 | -0.574 | 0.140  | -2.776 | -2.582 | -2.094 | -1.210 | -3.750 | -4.316 | 224912 | NA         | NM_177638_17_+1 |
| Dlgap1        | -4.981        | -4.981 | -4.971 | -4.976 | -4.971 | -4.971 | -4.981 | -4.981 | -4.882 | -4.981 | 224997 | DLGAP1     | NM_177639_17_+1 |
| D030056L22Rik | 4.875         | 4.970  | 4.139  | 4.035  | 4.035  | 3.847  | 4.024  | 3.785  | 3.238  | 3.215  | 225995 | C9orf40    | NM_177640_19_+1 |
|               | Zfp281        | 4.063  | 3.874  | 4.024  | 4.295  | 3.954  | 4.038  | 4.025  | 4.169  | 4.375  | 226442 | ZNF281     | NM_177643_1_+1  |
| Rasal2        | 1.732         | 2.916  | 2.998  | 3.355  | 5.375  | 5.044  | 3.860  | 3.062  | 0.122  | 3.013  | 226525 | RASAL2     | NM_177644_1_-1  |
| Kansl1l       | 3.882         | 4.499  | 2.298  | 2.504  | 2.404  | 3.062  | 2.819  | 2.437  | 2.570  | 2.879  | 68691  | KANSL1L    | NM_177645_1_-1  |
| Dgkd          | 5.768         | 6.306  | 4.145  | 4.118  | 5.740  | 5.886  | 5.766  | 6.077  | 6.633  | 6.797  | 227333 | DGKD       | NM_177646_1_+1  |
| Cdnf          | 0.053         | -0.435 | -1.837 | -1.170 | -1.659 | -1.329 | -1.421 | -1.601 | -3.153 | -1.216 | 227526 | CDNF       | NM_177647_2_+1  |
| Dolk          | 4.100         | 3.840  | 3.774  | 3.797  | 3.397  | 3.389  | 3.331  | 3.865  | 4.301  | 4.176  | 227697 | DOLK       | NM_177648_2_-1  |
| Ryr3          | -1.081        | -2.681 | -2.732 | -0.035 | 7.347  | 8.886  | 1.919  | 3.362  | -2.724 | -2.026 | 20192  | RYR3       | NM_177652_2_-1  |
| F830045P16Rik | -4.981        | -4.981 | -4.675 | -4.966 | -1.073 | 1.456  | -2.597 | -2.077 | -4.981 | -3.386 | 228592 | NA         | NM_177653_2_-1  |
|               | 6820408C15Rik | -1.054 | -2.768 | -4.206 | -3.674 | -3.993 | -4.335 | -3.793 | -4.590 | -3.754 | -4.981 | 228778     | C20orf96        |
| Zbtb10        | 4.863         | 6.006  | 2.295  | 2.452  | 3.270  | 3.648  | 2.495  | 2.442  | -2.957 | 0.288  | 229055 | ZBTB10     | NM_177660_3_+1  |
| Ctso          | 8.134         | 8.076  | 5.654  | 5.976  | 6.711  | 7.039  | 6.242  | 6.483  | 5.497  | 6.247  | 229445 | CTSO       | NM_177662_3_+1  |
| Isg20l2       | 3.747         | 3.940  | 4.254  | 4.263  | 4.146  | 4.143  | 4.379  | 4.213  | 4.678  | 4.612  | 229504 | ISG20L2    | NM_177663_3_+1  |
| Plppr4        | -2.686        | -1.745 | -0.520 | 1.702  | -4.380 | -0.606 | -1.739 | -0.233 | -1.977 | 1.994  | 229791 | PLPPR4     | NM_177664_3_-1  |
| Tmem69        | 4.292         | 4.552  | 4.755  | 4.387  | 4.695  | 5.037  | 4.608  | 4.467  | 3.831  | 3.715  | 230657 | TMEM69     | NM_177670_4_-1  |
| Tmem201       | 0.472         | 1.228  | -0.494 | -0.229 | 0.355  | 0.766  | 0.054  | 0.211  | -1.476 | -1.183 | 230917 | TMEM201    | NM_177672_4_-1  |
|               | Cep104        | 2.350  | 2.792  | 2.278  | 2.125  | 2.341  | 1.741  | 1.663  | 3.319  | 3.340  | 230967 | CEP104     | NM_177673_4_+1  |
| Cfap74        | -1.326        | -4.981 | -0.982 | -4.919 | -0.686 | -4.710 | -1.987 | -4.918 | -0.373 | -3.498 | 544678 | CFAP74     | NM_177674_4_+1  |
| Ablim2        | -4.981        | -4.232 | -4.772 | -4.815 | -4.898 | -4.956 | -3.836 | -4.875 | -4.593 | -2.761 | 231148 | ABLIM2     | NM_177678_5_+1  |
| Ythdc1        | 5.885         | 6.021  | 5.771  | 5.683  | 6.092  | 6.150  | 6.063  | 5.805  | 5.283  | 5.708  | 231386 | YTHDC1     | NM_177680_5_+1  |
| Zfp12         | 0.851         | -1.209 | -3.033 | 0.136  | 0.629  | 0.918  | 1.650  | -1.156 | 0.154  | 0.374  | 231866 | ZNF12      | NM_177681_5_+1  |
| Ccz1          | 6.565         | 6.622  | 6.441  | 6.540  | 6.479  | 6.579  | 6.452  | 6.422  | 6.206  | 6.332  | 231874 | CCZ1 CCZ1B | NM_177682_5_-1  |
| Vgll4         | 5.932         | 5.025  | 4.287  | 4.475  | 4.063  | 3.789  | 4.425  | 4.467  | 4.402  | 4.090  | 232334 | VGLL4      | NM_177683_6_-1  |
| Zfp637        | 5.104         | 5.466  | 3.992  | 3.984  | 4.023  | 4.059  | 3.897  | 4.050  | 3.578  | 3.648  | 232337 | ZNF32      | NM_177684_6_+1  |
| Clec12a       | 10.185        | 9.929  | 8.315  | 7.427  | 4.566  | 2.803  | 7.861  | 7.271  | 8.905  | 7.486  | 232413 | CLEC12A    | NM_177686_6_+1  |
| Crebl2        | 1.634         | 1.484  | 2.811  | 1.936  | 3.508  | 3.013  | 2.915  | 2.774  | 2.770  | 2.798  | 232430 | CREBL2     | NM_177687_6_+1  |
| H2afj         | 7.823         | 7.384  | 6.424  | 7.404  | 6.796  | 7.629  | 7.507  | 7.855  | 7.531  | 7.651  | 232440 | H2AFJ      | NM_177688_6_+1  |
| Ppm1n         | -0.200        | -1.340 | -1.988 | -0.820 | -0.009 | -1.352 | -0.413 | -0.090 | -2.377 | -2.750 | 232941 | PPM1N      | NM_177691_7_-1  |
| Bloc1s3       | 3.208         | 3.031  | 3.677  | 3.432  | 3.395  | 3.050  | 3.711  | 3.345  | 4.664  | 4.240  | 232946 | BLOC1S3    | NM_177692_7_-1  |
| Tmc3          | 0.460         | 0.045  | -0.486 | -1.210 | -0.553 | -0.679 | -0.953 | -0.355 | -2.358 | -1.521 | 233424 | TMC3       | NM_177695_7_+1  |
| Vwa3a         | -4.981        | -4.981 | -0.475 | -1.438 | -4.981 | -4.981 | -4.981 | -4.981 | -4.981 | -4.981 | 233813 | VWA3A      | NM_177697_7_+1  |
| Psd3          | 1.257         | 1.264  | 0.391  | -0.833 | -2.301 | -1.569 | -1.191 | -0.196 | -1.791 | -1.368 | 234353 | PSD3       | NM_177698_8_-1  |
| Fhod1         | 1.922         | 2.992  | 2.677  | 2.985  | 3.497  | 3.627  | 3.797  | 3.580  | 2.735  | 3.076  | 234686 | NA         | NM_177699_8_-1  |
| Atmin         | 3.957         | 3.461  | 5.210  | 5.450  | 4.262  | 4.337  | 4.817  | 4.830  | 5.813  | 5.617  | 234776 | ATMIN      | NM_177700_8_+1  |
| Gm4922        | -4.981        | -4.981 | -4.968 | -4.968 | -4.960 | -4.960 | -4.747 | -4.806 | -4.981 | -4.981 | 237300 | NA         | NM_177706_10_-1 |
| Stac3         | -2.268        | -2.365 | -2.412 | -2.716 | -1.596 | -3.105 | -2.733 | -3.821 | -2.946 | -3.797 | 237611 | STAC3      | NM_177707_10_+1 |
| Rtn4rl1       | 4.814         | 4.631  | 2.316  | 1.590  | 3.467  | 3.439  | 1.657  | 1.453  | -0.059 | -1.102 | 237847 | RTN4RL1    | NM_177708_11_+1 |
| Ssh2          | 3.695         | 3.216  | 3.980  | 3.227  | 4.840  | 5.052  | 5.915  | 5.611  | 7.519  | 7.774  | 237860 | SSH2       | NM_177710_11_+1 |
| Zfp874a       | 2.004         | 2.428  | 2.721  | 2.314  | 1.554  | 1.532  | 2.508  | 2.697  | 3.604  | 3.285  | 238692 | NA         | NM_177712_13_-1 |
| Gapt          | 8.435         | 9.163  | 1.085  | 1.340  | 4.230  | 4.357  | 4.198  | 4.505  | 5.778  | 5.846  | 238875 | GAPT       | NM_177713_13_-1 |
| Kctd12        | 8.520         | 8.916  | 7.633  | 7.206  | 6.049  | 6.210  | 7.237  | 7.301  | 6.742  | 7.757  | 239217 | KCTD12     | NM_177715_14_-1 |
| Ccdc184       | -0.323        | -4.981 | -3.622 | -2.195 | -3.099 | -1.602 | -2.193 | -2.937 | -4.981 | -4.981 | 239650 | CCDC184    | NM_177716_15_+1 |
| Mb21d2        | -3.843        | -2.600 | -4.826 | -3.675 | -4.984 | -3.363 | -4.891 | -2.950 | -4.981 | -1.160 | 239796 | MB21D2     | NM_177718_16_-1 |
| Ranbp6        | 3.451         | 3.228  | 3.375  | 3.459  | 3.390  | 3.495  | 3.365  | 3.396  | 4.035  | 4.397  | 240614 | RANBP6     | NM_177721_19_-1 |
| Mcmdc2        | -4.981        | -2.068 | -1.992 | -2.282 | -1.765 | -3.184 | -2.714 | -3.939 | -0.571 | -1.339 | 240697 | MCMDC2     | NM_177722_1_+1  |
| Vsig8         | -4.981        | -4.981 | -4.972 | -4.968 | -4.955 | -4.604 | -4.895 | -4.972 | -4.978 | -4.981 | 240916 | VSIG8      | NM_177723_1_+1  |
| Lrrc8a        | 4.248         | 3.812  | 3.029  | 3.041  | 2.913  | 2.930  | 3.455  | 3.408  | 3.320  | 3.173  | 241296 | LRRC8A     | NM_177725_2_+1  |
| Tgm6          | -4.860        | -4.981 | -4.713 | -2.586 | -4.595 | -4.150 | -4.889 | -4.960 | -4.981 | -4.967 | 241636 | TGM6       | NM_177726_2_+1  |
| Lsm14b        | 1.320         | 0.973  | 2.072  | 1.116  | 1.628  | 1.062  | 2.042  | 1.286  | 2.450  | 2.402  | 241846 | LSM14B     | NM_177727_2_+1  |
| Impad1        | 4.768         | 4.491  | 4.561  | 4.363  | 4.753  | 4.715  | 4.540  | 4.617  | 4.925  | 5.106  | 242291 | IMPAD1     | NM_177730_4_-1  |
| Slc35d1       | 0.012         | 1.202  | 1.830  | 1.896  | 1.647  | 1.997  | 1.856  | 2.143  | 2.670  | 3.016  | 242585 | SLC35D1    | NM_177732_4_-1  |
| E2f2          | -4.981        | -2.060 | -0.246 | 0.643  | 3.023  | 2.546  | 3.974  | 1.291  | 6.739  | 4.243  | 242705 | E2F2       | NM_177733_4_+1  |
| Lrrc61        | -0.375        | 0.357  | 2.495  | 1.551  | 2.340  | 1.221  | 2.416  | 1.441  | 2.030  | 1.735  | 243371 | LRRC61     | NM_177736_6_+1  |
| Zfp507        | 2.095         | 1.144  | -3.197 | -0.849 | -1.012 | 0.444  | -0.341 | 1.432  | -0.490 | -0.972 | 668501 | ZNF507     | NM_177739_7_-1  |
| Ppp1r3b       | 1.000         | 2.301  | -1.672 | 0.925  | -0.585 | 1.136  | 1.267  | 1.953  | 3.092  | 3.845  | 244416 | PPP1R3B    | NM_177741_8_+1  |
| Fam198a       | -4.981        | -4.981 | -4.975 | -2.060 | -3.427 | -1.972 | -4.976 | -3.677 | -4.981 | -2.481 | 245050 | FAM198A    | NM_177743_9_+1  |
| Awat2         | -1.961        | -4.981 | -3.238 | -4.255 | -2.112 | -4.190 | -4.011 | -4.935 | -4.981 | -4.981 | 245532 | AWAT2      | NM_177746_X_-1  |
| Eme1          | -0.304        | -0.955 | 1.201  | 1.179  | 2.010  | 1.079  | 1.444  | 0.670  | 0.699  | 0.158  | 268465 | EME1       | NM_177752_11_-1 |
| Colgalt2      | -2.842        | -4.981 | -3.742 | -4.183 | -4.964 | -4.515 | -2.498 | -2.104 | -4.981 | -4.981 | 269132 | COLGALT2   | NM_177756_1_+1  |
| Zscan20       | 2.277         | 0.851  | 1.992  | 1.863  | 1.929  | 1.899  | 1.394  | 0.825  | 1.181  | 1.068  | 269585 | ZSCAN20    | NM_177758_4_-1  |
| Aak1          | 3.126         | 3.096  | 1.739  | 0.887  | 2.286  | 1.476  | 1.907  | -0.337 | 2.445  | 0.702  | 269774 | AAK1       | NM_177762_6_+1  |
| Lhfp4l        | -1.743        | -0.760 | 0.635  | -0.529 | -1.446 | -2.470 | -2.123 | -4.028 | -3.531 | -4.981 | 269788 | LHFP4L     | NM_177763_6_-1  |
| Vmn2r57       | -4.981        | -4.981 | -4.285 | -4.969 | -4.063 | -4.955 | -4.981 | -4.981 | -3.109 | -4.981 | 269902 | NA         | NM_177764_7_-1  |
| Ttl13         | -0.874        | -1.949 | -4.828 | -4.856 | -4.680 | -4.258 | -3.793 | -3.485 | -3.750 | -2.461 | 269954 | NA         | NM_177765_7_+1  |
| Slc35e1       | 4.039         | 4.076  | 5.408  | 5.196  | 5.111  | 4.931  | 5.434  | 5.394  | 6.826  | 6.469  | 270066 | SLC35E1    | NM_177766_8_-1  |
| Ogfod1        | 2.924         | 3.142  | 3.223  | 3.370  | 3.120  | 3.083  | 2.707  | 2.736  | 2.711  | 3.069  | 270086 | OGFOD1     | NM_177767_8_+1  |
| Klhl18        | 3.485         | 3.727  | 4.681  | 4.453  | 5.282  | 5.545  | 4.752  | 4.218  | 4.507  | 4.595  | 270201 | KLHL18     | NM_177771_9_-1  |
| Bpifc         | -3.563        | -4.981 | -4.456 | -4.211 | -3.165 | -2.377 | -4.113 | -1.987 | -2.450 | -4.981 | 270757 | BPIFC      | NM_177772_10_-1 |
| Srsf12        | -4.981        | -4.981 | -4.989 | -4.989 | -3.227 | -4.108 | -4.560 | -4.885 | -4.981 | -2.647 | 272009 | NA         | NM_177774_4_+1  |
| Esyt3         | -3.563        | -0.874 | 3.221  | 1.356  | -0.282 | 1.136  | -0.235 | -2.458 | -2.434 | -3.816 | 272636 | ESYT3      | NM_177775_9_-1  |

|               |        |        |        |        |        |        |        |        |        |        |        |                 |                 |
|---------------|--------|--------|--------|--------|--------|--------|--------|--------|--------|--------|--------|-----------------|-----------------|
| Smtnl2        | -4.981 | -3.267 | -1.529 | -1.878 | -2.645 | -4.614 | -4.518 | -3.654 | -3.502 | -2.690 | 276829 | SMTNL2          | NM_177776_11_-1 |
| D11Wsu47e     | 3.479  | 3.398  | 3.418  | 3.251  | 3.588  | 3.601  | 3.205  | 3.046  | 3.106  | 3.221  | 276852 | C17orf80        | NM_177777_11_+1 |
| Armc7         | 3.135  | 3.756  | 4.806  | 4.556  | 4.341  | 4.574  | 4.810  | 4.676  | 5.017  | 4.872  | 276905 | ARMC7           | NM_177778_11_+1 |
| Dock5         | -1.068 | -1.663 | 6.896  | 6.757  | 6.153  | 6.618  | 5.857  | 5.707  | 5.635  | 5.490  | 68813  | DOCK5           | NM_177780_14_-1 |
| Trpa1         | 0.733  | 2.834  | -4.981 | -4.981 | -4.981 | -4.981 | -4.965 | -4.953 | -4.981 | -2.349 | 277328 | TRPA1           | NM_177781_1_-1  |
| Prex1         | 4.797  | 4.790  | 6.810  | 6.866  | 7.665  | 7.530  | 7.530  | 7.519  | 8.368  | 8.571  | 277360 | PREX1           | NM_177782_2_-1  |
| Ubr3          | 3.089  | 3.450  | 3.380  | 3.288  | 3.540  | 3.463  | 3.529  | 3.268  | 3.300  | 3.963  | 68795  | UBR3            | NM_177783_2_+1  |
| Klhl23        | -2.686 | -2.349 | 1.580  | 1.502  | 0.638  | 0.506  | 0.300  | 0.671  | 1.219  | 0.678  | 277396 | KLHL23 PHOSPHO: | NM_177784_2_+1  |
| Depdc5        | -0.896 | -0.511 | -0.823 | -0.608 | 1.481  | 0.133  | 0.934  | 0.244  | 1.815  | 2.231  | 277854 | DEPDC5          | NM_177786_5_+1  |
| Exoc3l        | -1.334 | 0.057  | -1.813 | -1.239 | -1.746 | -2.218 | -1.752 | -1.178 | -0.936 | -1.812 | 277978 | EXOC3L1         | NM_177788_8_-1  |
| Vsig4         | 1.853  | -4.981 | -3.069 | -4.976 | -2.489 | -4.966 | -3.230 | -4.894 | -2.605 | -4.981 | 278180 | VSIG4           | NM_177789_X_-1  |
| Zfp385c       | 0.853  | 0.555  | -1.825 | -3.537 | -2.094 | -3.148 | -0.443 | 0.375  | 0.966  | 1.409  | 278304 | LOC100507656    | NM_177790_11_-1 |
| Kctd19        | -4.981 | -4.981 | -4.502 | -4.452 | -4.841 | -4.978 | -4.744 | -4.881 | -4.981 | -4.981 | 279499 | KCTD19          | NM_177791_8_-1  |
| Tmem26        | 1.235  | -1.756 | -0.514 | 0.092  | 0.988  | 0.113  | 3.593  | 3.843  | 3.406  | 3.060  | 327766 | TMEM26          | NM_177794_10_+1 |
| Frs2          | 3.321  | 3.387  | 3.549  | 3.700  | 3.708  | 3.715  | 3.924  | 3.522  | 4.473  | 4.647  | 327826 | FRS2            | NM_177798_10_-1 |
| Spat32        | -4.981 | -4.981 | -4.516 | -4.981 | -4.978 | -4.978 | -4.947 | -4.964 | -4.981 | -4.981 | 328019 | SPATA32         | NM_177801_11_-1 |
| Fam179b       | 4.731  | 5.011  | 4.792  | 4.725  | 4.794  | 4.938  | 4.252  | 4.256  | 4.727  | 4.676  | 328108 | FAM179B         | NM_177805_12_+1 |
| Prpf39        | 5.983  | 6.022  | 5.883  | 5.828  | 6.055  | 6.206  | 5.904  | 5.875  | 5.386  | 5.711  | 328110 | PRPF39          | NM_177806_12_+1 |
| Zfp459        | 0.605  | 1.288  | 1.899  | 0.094  | 0.895  | 0.209  | 0.480  | -0.352 | -1.318 | -0.212 | 328274 | NA              | NM_177811_13_-1 |
| Rft1          | 4.073  | 3.733  | 3.509  | 3.530  | 3.778  | 3.736  | 3.786  | 3.771  | 4.753  | 4.076  | 328370 | RFT1            | NM_177815_14_+1 |
| Sh2d4b        | -4.981 | -3.267 | -3.824 | -4.157 | -3.597 | -4.698 | -4.504 | -4.532 | -3.322 | -2.429 | 328381 | SH2D4B          | NM_177816_14_-1 |
| Apol10b       | -1.529 | -4.981 | 4.684  | 2.368  | 2.157  | -4.447 | 1.182  | -3.339 | -3.109 | -4.981 | 328561 | NA              | NM_177820_15_-1 |
| Ep300         | 5.070  | 5.056  | 5.727  | 5.674  | 6.240  | 6.157  | 6.152  | 6.124  | 6.706  | 6.892  | 328572 | EP300           | NM_177821_15_+1 |
| Ubash3a       | 0.284  | -1.296 | -1.214 | -1.631 | -2.448 | -0.896 | -0.906 | 0.686  | 0.230  | -2.629 | 328795 | UBASH3A         | NM_177823_17_+1 |
| 9830107B12Rik | -0.161 | 0.862  | -4.903 | -1.036 | -4.128 | -4.857 | -2.454 | -0.589 | -0.278 | 1.071  | 328829 | NA              | NM_177824_17_-1 |
| Arhgef37      | -4.981 | -4.981 | -4.957 | -4.046 | -4.880 | -4.957 | 0.063  | 0.292  | 6.935  | 5.549  | 328967 | ARHGEF37        | NM_177828_18_-1 |
| Spink10       | -1.504 | -1.140 | -1.770 | -3.420 | -2.330 | -2.936 | -2.639 | -3.146 | -1.952 | -2.371 | 328971 | NA              | NM_177829_18_+1 |
| Zfp236        | 5.000  | 5.051  | 4.777  | 4.545  | 5.015  | 5.036  | 4.855  | 4.866  | 4.503  | 4.533  | 329002 | ZNF236          | NM_177832_18_-1 |
| Lcmt2         | 3.948  | 4.140  | 3.838  | 3.500  | 3.777  | 3.385  | 3.605  | 3.625  | 3.602  | 3.078  | 329504 | LCMT2           | NM_177846_2_-1  |
| Dido1         | -0.581 | 0.892  | 1.239  | -0.591 | 1.227  | 1.307  | 0.464  | 0.081  | 1.148  | 0.698  | 23856  | DIDO1           | NM_177852_2_-1  |
| Med12l        | 1.497  | 1.444  | 0.791  | 0.455  | -2.433 | -1.296 | -0.673 | -0.178 | -0.108 | 0.253  | 329650 | MED12L          | NM_177855_3_+1  |
| E130311K13Rik | 4.018  | 4.106  | 2.917  | 2.336  | 3.098  | 3.226  | 2.596  | 2.245  | 1.495  | 1.533  | 329659 | C3orf33         | NM_177856_3_-1  |
| Dennd2c       | -0.115 | -0.355 | 2.230  | 2.207  | 0.538  | 1.472  | 1.424  | 2.029  | 2.318  | 2.767  | 329727 | DENND2C         | NM_177857_3_+1  |
| Tmem67        | 2.852  | 2.868  | 3.228  | 3.178  | 1.285  | 1.142  | 1.620  | 2.187  | 3.155  | 3.451  | 329795 | TMEM67          | NM_177861_4_-1  |
| Spat21        | -4.981 | -4.981 | -4.508 | -4.821 | -4.842 | -4.898 | -4.852 | -4.817 | -4.190 | -4.227 | 329972 | SPATA21         | NM_177867_4_+1  |
| Fhad1         | -1.922 | -3.267 | 2.954  | 2.642  | 2.020  | 1.115  | 0.901  | -0.598 | -3.088 | -2.601 | 329977 | FHAD1           | NM_177868_4_-1  |
| Fam185a       | 2.565  | 2.608  | 2.022  | 2.734  | 1.242  | 1.946  | 1.135  | 1.559  | 1.068  | 0.469  | 330050 | FAM185A         | NM_177869_5_+1  |
| Slc5a6        | -3.921 | -3.224 | -4.089 | -4.555 | -2.631 | -4.925 | -3.941 | -4.778 | -1.858 | -4.757 | 330064 | SLC5A6          | NM_177870_5_-1  |
| Adamts3       | -4.981 | -4.981 | -1.330 | -2.404 | -1.456 | -1.137 | -2.592 | -3.169 | -1.702 | -0.886 | 330119 | ADAMTS3         | NM_177872_5_-1  |
| Hfm1          | 0.501  | -0.240 | -2.111 | -3.608 | -2.602 | -3.568 | -4.972 | -3.885 | -4.981 | -4.981 | 330149 | HFM1            | NM_177873_5_-1  |
| Vps37b        | 4.410  | 4.591  | 3.921  | 3.875  | 3.647  | 2.961  | 4.995  | 5.329  | 6.373  | 6.039  | 330192 | VPS37B          | NM_177876_5_-1  |
| Mblac1        | 1.499  | 3.133  | 2.165  | 3.350  | 1.943  | 3.312  | 2.080  | 2.812  | 2.276  | 2.249  | 330216 | MBLAC1          | NM_177878_5_+1  |
| Sdk1          | -4.981 | -0.910 | -4.771 | -4.934 | -1.503 | -1.375 | -4.077 | -4.648 | -4.981 | -4.981 | 330222 | SDK1            | NM_177879_5_+1  |
| Zfp786        | -4.981 | -4.981 | -4.910 | -2.258 | -4.816 | -4.933 | -4.962 | -4.868 | -4.981 | -4.981 | 330301 | ZNF786          | NM_177882_6_-1  |
| Fam188b       | -4.981 | -2.106 | -3.066 | -4.520 | -4.482 | -3.698 | -2.997 | -4.749 | -1.657 | -4.865 | 330323 | FAM188B         | NM_177883_6_+1  |
| Gcfc2         | 1.793  | 2.725  | 2.043  | 2.300  | 2.241  | 2.368  | 1.704  | 2.199  | 2.338  | 2.095  | 330361 | GCFC2           | NM_177884_6_+1  |
| Tmem150b      | -4.981 | -4.981 | 2.838  | 1.949  | 3.512  | 2.905  | 3.339  | 2.194  | 2.427  | 1.524  | 330460 | TMEM150B        | NM_177887_7_-1  |
| Zfp78         | -0.394 | -2.514 | -2.884 | -2.004 | -1.854 | -1.706 | -4.175 | -2.955 | -4.637 | -4.924 | 330463 | ZNF471          | NM_177888_7_+1  |
| Zfp82         | 2.941  | 2.288  | 2.267  | 0.997  | 1.547  | 1.485  | 1.579  | 0.579  | 0.227  | 0.606  | 330502 | ZFP82           | NM_177889_7_-1  |
| Fan1          | 2.790  | 2.674  | 1.643  | 1.564  | 2.637  | 2.505  | 1.998  | 1.920  | 1.397  | 0.779  | 330554 | FAN1            | NM_177893_7_-1  |
| Saxo2         | -2.164 | -0.606 | -4.178 | -4.979 | -4.954 | -3.909 | -4.967 | -4.594 | -4.981 | -4.981 | 330577 | SAXO2           | NM_177894_7_-1  |
| B4galnt4      | -3.090 | -4.981 | -2.453 | -3.493 | -3.067 | -4.869 | -3.720 | -2.883 | -0.517 | -3.191 | 330671 | B4GALNT4        | NM_177897_7_+1  |
| Nek5          | -3.668 | -4.981 | -3.641 | -4.245 | -4.618 | -4.979 | -4.753 | -4.886 | -3.750 | -2.988 | 330721 | NEK5            | NM_177898_8_-1  |
| Zfp866        | 4.129  | 4.281  | 4.433  | 4.298  | 4.768  | 4.558  | 4.453  | 4.183  | 4.528  | 4.329  | 330788 | NA              | NM_177899_8_-1  |
| Piwil4        | -2.215 | -1.535 | -1.293 | -1.631 | -0.231 | -0.767 | -0.710 | -1.891 | -2.712 | -3.855 | 330890 | PIWIL4          | NM_177905_9_-1  |
| Slc9a9        | 6.300  | 6.663  | 7.172  | 7.057  | 5.704  | 5.943  | 5.079  | 5.416  | 5.510  | 5.868  | 331004 | SLC9A9          | NM_177909_9_+1  |
| Gmppb         | 5.556  | 5.716  | 5.130  | 5.324  | 4.904  | 4.953  | 4.578  | 4.747  | 4.314  | 4.395  | 331026 | GMPPB           | NM_177910_9_+1  |
| Tgm4          | 0.727  | 1.501  | 1.708  | 1.465  | 1.143  | 0.618  | 1.737  | 1.826  | 2.388  | 2.382  | 331046 | TGM4            | NM_177911_9_+1  |
| Dgkk          | -2.948 | -3.408 | -0.683 | 1.043  | -2.655 | -3.657 | -4.915 | -2.407 | -4.981 | -4.981 | 331374 | DGKK            | NM_177914_X_+1  |
| Tceal5        | -4.981 | -4.981 | -4.949 | -4.949 | -4.892 | -3.130 | -4.880 | -4.918 | -4.981 | -4.981 | 331532 | TCEAL5          | NM_177919_X_-1  |
| Hap1          | -2.075 | -3.267 | 0.881  | 1.368  | 4.082  | 3.814  | 4.045  | 2.848  | -2.287 | -1.562 | 15114  | HAP1            | NM_177981_11_-1 |
| Gmpr2         | 5.868  | 6.067  | 6.691  | 6.570  | 5.638  | 5.471  | 5.712  | 6.028  | 5.751  | 5.847  | 105446 | GMPR2           | NM_177992_14_+1 |
| Hbp1          | 3.085  | 3.309  | 2.855  | 2.322  | 2.346  | 1.618  | 1.645  | 1.968  | 2.399  | 2.187  | 73389  | HBP1            | NM_177993_12_-1 |
| R3hdm4        | 8.652  | 8.603  | 6.721  | 6.862  | 6.845  | 6.784  | 6.690  | 6.741  | 7.263  | 6.831  | 109284 | R3HDM4          | NM_177994_10_-1 |
| Lrrtm2        | 1.512  | 0.910  | 1.658  | 1.253  | 1.151  | 0.290  | 1.142  | -1.027 | 0.040  | 0.583  | 107065 | LRRTM2          | NM_178005_18_-1 |
| Pigk          | -4.774 | -4.611 | -3.551 | -4.950 | -4.918 | -3.938 | -4.798 | -3.972 | -4.730 | -2.284 | 329777 | PIGK            | NM_178016_3_+1  |
| Hmgxb4        | 2.983  | 3.188  | 3.376  | 3.472  | 3.740  | 3.533  | 3.624  | 3.399  | 3.801  | 3.673  | 70823  | HMGXB4          | NM_178017_8_+1  |
| Hyal3         | -1.155 | -1.057 | -1.165 | -1.592 | -1.109 | -2.179 | -0.877 | -2.174 | -1.197 | -1.611 | 109685 | HYAL3           | NM_178020_9_+1  |
| Vps26b        | 5.113  | 5.233  | 5.245  | 5.052  | 5.421  | 5.113  | 5.248  | 5.315  | 6.099  | 6.032  | 69091  | VPS26B          | NM_178027_9_-1  |
| Setd1a        | 3.161  | 3.127  | 2.848  | 2.901  | 3.218  | 3.269  | 3.022  | 2.840  | 2.564  | 2.497  | 233904 | SETD1A          | NM_178029_7_+1  |
| Fads6         | -3.349 | -4.981 | -2.933 | -1.956 | -0.240 | -0.863 | -0.809 | -2.452 | -1.175 | -3.236 | 328035 | FADS6           | NM_178035_11_-1 |
| Eif5          | 1.841  | 1.750  | 0.964  | 2.141  | 1.478  | 0.629  | 1.819  | 1.518  | 1.591  | 1.909  | 217869 | EIF5            | NM_178041_12_+1 |
| Rassf4        | 7.363  | 7.545  | 7.570  | 7.744  | 8.604  | 8.539  | 8.538  | 8.509  | 9.780  | 9.819  | 213391 | RASSF4          | NM_178045_6_-1  |
| Prom2         | -4.981 | -4.981 | -1.687 | -2.970 | -1.027 | -2.821 | -2.021 | -4.182 | -4.504 | -4.981 | 192212 | PROM2           | NM_178047_2_-1  |

|               |        |        |        |        |        |        |        |        |        |        |        |                    |                      |
|---------------|--------|--------|--------|--------|--------|--------|--------|--------|--------|--------|--------|--------------------|----------------------|
| Ati2          | -4.884 | -4.382 | -4.964 | -4.947 | -4.041 | -4.886 | -3.402 | -4.913 | -4.749 | -4.784 | 56298  | ATL2               | NM_178050_17_-1      |
| Mterf4        | 4.701  | 4.753  | 3.772  | 3.634  | 3.516  | 3.567  | 2.933  | 3.168  | 3.181  | 2.813  | 69821  | MTERF4             | NM_178051_1_-1       |
| Dnajb2        | 0.443  | -0.372 | -2.879 | -0.087 | -3.151 | -4.864 | -1.336 | -2.483 | -4.857 | -4.968 | 56812  | DNAJB2             | NM_178055_1_+1       |
| Tm2d3         | 4.543  | 4.269  | 3.461  | 3.609  | 2.808  | 2.521  | 3.060  | 2.835  | 2.342  | 2.496  | 68634  | TM2D3              | NM_178056_7_+1       |
| Aifm2         | -4.854 | -2.956 | -1.302 | -0.099 | -3.012 | -1.210 | -0.758 | 0.587  | 1.606  | 1.555  | 71361  | AIFM2              | NM_178058_10_+1      |
| Etl4          | -4.981 | -4.297 | -4.720 | -4.809 | -4.974 | -4.924 | -4.980 | -4.944 | -4.809 | -4.800 | 208618 | KIAA1217           | NM_178059_2_+1       |
| Thra          | -0.223 | 0.452  | -0.888 | -0.157 | -1.447 | -1.610 | 0.701  | 0.249  | 1.957  | 1.880  | 21833  | THRA               | NM_178060_11_+1      |
| Mob3b         | 4.999  | 4.509  | 4.605  | 3.751  | 4.277  | 3.742  | 4.914  | 4.101  | 5.992  | 4.810  | 214944 | MOB3B              | NM_178061_4_-1       |
| Arel1         | 3.713  | 3.904  | 4.784  | 4.766  | 4.823  | 4.880  | 4.699  | 5.033  | 5.591  | 5.585  | 68497  | AREL1              | NM_178065_12_-1      |
| Tmem198b      | 1.420  | 1.328  | 2.182  | 1.936  | 1.731  | 0.910  | 1.480  | 2.458  | 2.773  | 3.213  | 73827  | NA                 | NM_178066_10_-1      |
| Lsg1          | 5.245  | 5.183  | 5.254  | 5.276  | 5.287  | 5.165  | 5.125  | 5.141  | 5.068  | 4.738  | 224092 | LSG1               | NM_178069_16_-1      |
| Vps33b        | 4.149  | 4.466  | 4.097  | 4.293  | 4.035  | 4.078  | 3.909  | 4.303  | 4.506  | 4.140  | 233405 | VPS33B             | NM_178070_7_+1       |
| Nme7          | 0.604  | -3.007 | -1.980 | -3.348 | -1.629 | -3.139 | -0.836 | -3.847 | -2.894 | -2.710 | 171567 | NME7               | NM_178071_1_+1       |
| Mcf2l         | -4.545 | -3.739 | -4.612 | -4.815 | -4.954 | -4.890 | -4.757 | -4.733 | -3.861 | -4.394 | 17207  | MCF2L              | NM_178076_8_+1       |
| Cnot1         | 4.951  | 5.206  | 6.242  | 6.037  | 6.079  | 5.901  | 5.965  | 6.024  | 6.370  | 6.658  | 234594 | CNOT1              | NM_178078_8_-1       |
| Pde4dip       | 5.427  | 5.632  | 5.581  | 5.947  | 6.583  | 6.693  | 6.033  | 5.942  | 5.052  | 5.822  | 83679  | PDE4DIP            | NM_178080_3_-1       |
| Mfsd6         | -4.981 | -1.281 | 0.395  | 0.119  | 0.823  | 0.495  | -1.048 | -1.684 | 0.927  | 1.340  | 98682  | MFSD6              | NM_178081_1_-1       |
| Insig2        | 4.565  | 5.035  | 5.178  | 4.612  | 4.004  | 3.809  | 4.006  | 3.878  | 4.072  | 4.021  | 72999  | INSIG2             | NM_178082_1_-1       |
| Zak           | -4.981 | -4.981 | 0.288  | -0.444 | -1.881 | -3.796 | -0.459 | -1.790 | -2.494 | -1.900 | 65964  | ZAK                | NM_178084_2_+1       |
| Erc1          | -4.981 | -1.579 | 0.452  | 0.358  | -2.335 | -0.718 | -1.678 | -2.462 | -1.587 | -1.823 | 111173 | ERC1               | NM_178085_6_-1       |
| Pml           | 4.909  | 5.218  | 4.405  | 4.946  | 2.596  | 3.570  | 3.313  | 4.400  | 4.243  | 3.681  | 18854  | PML                | NM_178087_9_-1       |
| Hnrnpul1      | 2.155  | 1.810  | 1.749  | 0.822  | 1.130  | 0.837  | 0.863  | 0.283  | 0.312  | 0.635  | 232989 | HNRNPUL1           | NM_178089_7_-1       |
| 4930486L24Rik | -2.948 | -4.981 | 0.096  | 0.655  | -3.108 | -4.804 | -2.795 | -3.027 | -2.989 | -2.562 | 214639 | NA                 | NM_178098_13_-1      |
| Trim62        | 2.037  | 1.611  | 2.691  | 1.998  | 1.949  | 1.901  | 2.625  | 2.054  | 3.529  | 3.299  | 67525  | TRIM62             | NM_178110_4_+1       |
| Trp53inp2     | 2.308  | 2.753  | 2.597  | 2.766  | 3.164  | 3.393  | 3.221  | 3.424  | 4.001  | 4.497  | 68728  | TP53INP2           | NM_178111_2_+1       |
| Ints8         | 3.712  | 4.208  | 4.814  | 4.704  | 4.319  | 4.203  | 3.910  | 4.276  | 4.743  | 5.319  | 72656  | INTS8              | NM_178112_4_-1       |
| Ncapd3        | 3.926  | 4.128  | 4.005  | 3.669  | 4.922  | 4.725  | 4.580  | 4.323  | 4.358  | 4.156  | 78658  | NCAPD3             | NM_178113_9_+1       |
| Amigo2        | -4.981 | -4.788 | -4.820 | -3.615 | -4.868 | -2.647 | -3.847 | -1.616 | -4.954 | -4.972 | 105827 | AMIGO2             | NM_178114_15_-1      |
| Edrf1         | 3.776  | 4.061  | 3.809  | 3.765  | 3.904  | 3.986  | 3.486  | 3.652  | 3.986  | 4.063  | 214764 | EDRF1              | NM_178115_7_+1       |
| Camta2        | -0.169 | -0.621 | 0.991  | 0.547  | 0.677  | 0.233  | 1.528  | 0.079  | 2.209  | 1.981  | 216874 | CAMTA2             | NM_178116_11_-1      |
| Dixdc1        | -0.449 | 1.297  | -1.882 | -1.331 | -2.175 | -2.269 | -3.516 | -2.709 | -4.394 | -3.480 | 330938 | DIXDC1             | NM_178118_9_-1       |
| Agap1         | -3.026 | -3.043 | 2.102  | 1.765  | 2.601  | 1.933  | 0.450  | 1.925  | 1.743  | 3.203  | 347722 | AGAP1              | NM_178119_1_+1       |
| 3830406C13Rik | 4.910  | 4.717  | 4.805  | 4.946  | 4.176  | 4.465  | 4.346  | 4.543  | 3.395  | 4.227  | 218734 | C3orf14            | NM_178141_14_+1      |
| Lcorl         | 2.497  | 2.993  | 3.225  | 3.380  | 2.068  | 1.987  | 2.546  | 2.997  | 2.856  | 3.607  | 209707 | LCORL              | NM_178142_5_-1       |
| Prkaa2        | -1.276 | -1.236 | -4.981 | -4.981 | -4.977 | -4.977 | -4.958 | -4.101 | -4.981 | -4.981 | 108079 | PRKAA2             | NM_178143_4_-1       |
| Pik3ip1       | 6.531  | 5.566  | 5.583  | 4.649  | 5.543  | 4.475  | 4.853  | 3.951  | 2.561  | 1.309  | 216505 | PIK3IP1            | NM_178149_11_+1      |
| Agfg2         | 3.211  | 2.838  | 3.550  | 3.497  | 3.383  | 3.173  | 3.596  | 3.349  | 4.473  | 4.038  | 231801 | AGFG2              | NM_178162_5_-1       |
| Ptbp3         | 6.210  | 6.581  | 7.437  | 7.219  | 7.481  | 7.582  | 7.543  | 7.448  | 7.878  | 8.305  | 230257 | PTBP3              | NM_178164_4_-1       |
| Fcrl1         | -0.085 | -2.217 | 5.051  | 4.901  | 6.127  | 5.795  | 5.902  | 4.801  | 2.761  | 1.718  | 229499 | FCRL1              | NM_178165_3_+1       |
| Hist1h2ai     | -1.208 | -0.154 | -0.389 | -0.373 | 0.915  | 0.278  | 0.839  | -0.217 | 0.113  | -1.187 | 319191 | HIST1H2AE          | NM_178182_13_+1      |
| Hist1h2ak     | -0.639 | -1.368 | -0.751 | -0.807 | 0.340  | -0.593 | -0.185 | -1.216 | -0.677 | -0.779 | 319169 | HIST1H2AA          | NM_178183_13_-1      |
| Hist1h2an     | -1.023 | -4.981 | -0.921 | -1.352 | 0.447  | -0.318 | -0.127 | -0.986 | -2.246 | -1.292 | 319170 | HIST1H2AG          | NM_178184_13_-1      |
| Hist1h2ap     | -4.118 | -4.104 | -3.726 | -2.097 | -1.992 | -1.459 | -0.859 | -1.018 | 0.466  | -0.660 | 319171 | NA                 | NM_178185_13_+1      |
| Hist1h2ap     | -4.115 | -4.118 | -3.928 | -2.578 | -2.053 | -1.700 | -1.146 | -1.266 | 0.430  | -0.316 | 319171 | NA                 | NM_178185_dup1_13_-1 |
| Hist1h2ag     | -3.292 | 0.102  | 0.692  | 1.716  | 1.863  | 2.421  | 1.385  | 0.824  | -0.605 | -0.369 | 319167 | HIST1H2AB          | NM_178186_13_-1      |
| Hist1h2ae     | 0.881  | -0.077 | 3.107  | 1.752  | 4.879  | 2.482  | 3.880  | 0.150  | 1.584  | -0.693 | 319166 | HIST1H2AL          | NM_178187_13_-1      |
| Hist1h2ad     | -2.339 | -0.497 | -0.034 | 1.630  | 0.856  | 2.205  | -0.014 | 0.802  | 0.101  | -1.125 | 319165 | HIST1H2AM          | NM_178188_13_+1      |
| Hist1h2ac     | 0.774  | 0.582  | 0.952  | 0.500  | 2.015  | 1.087  | 1.101  | -0.204 | 1.322  | 1.014  | 319164 | HIST1H2AK          | NM_178189_13_-1      |
| Hist1h4a      | -0.704 | -0.741 | -1.453 | -1.435 | -1.672 | -0.955 | -1.713 | -2.146 | -1.272 | -1.649 | 326619 | HIST2H4B           | NM_178192_13_-1      |
| Hist1h4b      | -1.015 | -1.475 | 0.429  | -1.675 | 0.705  | -1.827 | 0.736  | -1.979 | -0.470 | -1.600 | 326620 | HIST2H4A           | NM_178193_13_+1      |
| Hist1h2be     | -0.716 | -1.798 | -1.429 | -0.757 | -1.168 | -0.467 | -1.261 | -4.493 | -3.743 | -2.218 | 319179 | HIST1H2BF          | NM_178194_13_-1      |
| Hist1h2bf     | -1.915 | -4.981 | -1.507 | -3.435 | -1.021 | -4.450 | -1.669 | -4.090 | -2.041 | -3.988 | 319180 | HIST1H2BG          | NM_178195_13_-1      |
| Hist1h2bg     | 1.119  | 0.445  | 2.336  | 1.502  | 2.973  | 1.796  | 2.210  | 0.720  | 2.338  | 0.614  | 319181 | HIST1H2BC          | NM_178196_13_+1      |
| Hist1h2bh     | -0.969 | -0.832 | -0.742 | -0.487 | -0.183 | -0.107 | -1.207 | -1.673 | -2.042 | -2.452 | 319182 | NA                 | NM_178197_13_-1      |
| Hist1h2bj     | -1.132 | -1.468 | 0.287  | -0.476 | 1.729  | -0.268 | 1.497  | -0.443 | 0.824  | -1.393 | 319183 | HIST1H2BL          | NM_178198_13_+1      |
| Hist1h2bl     | -3.399 | -0.690 | -2.458 | -0.342 | -1.388 | 0.500  | -0.675 | -0.378 | -1.154 | -0.909 | 319185 | HIST1H2BE          | NM_178199_13_-1      |
| Hist1h2bm     | -4.981 | -4.981 | -1.061 | -2.100 | -0.764 | -1.934 | -1.018 | -2.542 | -1.986 | -2.319 | 319186 | HIST1H2BN          | NM_178200_13_+1      |
| Hist1h2bn     | -4.981 | -1.548 | -1.873 | -0.883 | -0.911 | -0.361 | -1.383 | -1.376 | -2.012 | -1.018 | 319187 | HIST1H2BM          | NM_178201_13_+1      |
| Hist1h2bp     | -4.981 | -4.981 | -1.874 | -2.611 | -2.787 | -3.220 | -3.986 | -3.122 | -4.981 | -4.981 | 319188 | HIST1H2BO          | NM_178202_13_+1      |
| Hist1h3b      | -4.981 | -1.344 | -2.098 | -1.495 | -0.883 | -0.928 | -1.217 | -1.691 | -3.766 | -4.981 | 319150 | HIST1H3H           | NM_178203_13_+1      |
| Hist1h3d      | -1.978 | -1.768 | -0.025 | 0.420  | -0.027 | 0.483  | 0.348  | -0.699 | -0.810 | -0.111 | 319149 | HIST1H3A           | NM_178204_13_+1      |
| Hist1h3e      | 0.530  | -0.429 | 0.991  | 0.814  | 1.112  | 1.425  | 0.776  | 0.318  | 1.162  | -0.239 | 319151 | HIST1H3I           | NM_178205_13_-1      |
| Hist1h3h      | -2.558 | -2.398 | -2.188 | -0.485 | -2.693 | -1.443 | -1.234 | -1.021 | -1.909 | -3.102 | 319152 | HIST1H3E           | NM_178206_13_+1      |
| Hist1h3i      | -1.560 | -2.022 | -0.204 | 0.209  | 0.029  | 0.359  | 0.567  | -0.333 | -0.331 | -0.095 | 319153 | HIST1H3F           | NM_178207_13_-1      |
| Hist1h4c      | 1.470  | 1.258  | 2.034  | 1.091  | 2.971  | 1.578  | 3.147  | 1.940  | 2.795  | 1.704  | 319155 | HIST1H4F           | NM_178208_13_-1      |
| Hist1h4j      | -3.286 | -4.981 | -4.177 | -3.267 | -3.318 | -4.629 | -3.495 | -4.380 | -3.445 | -2.968 | 319159 | HIST1H4K           | NM_178210_13_+1      |
| Hist1h4k      | -2.168 | -1.749 | -1.062 | -1.635 | -2.445 | -2.877 | -2.464 | -2.628 | -2.431 | -2.594 | 319160 | HIST1H4H           | NM_178211_13_-1      |
| Hist2h2aa2    | -4.029 | -0.879 | -2.483 | -4.594 | -2.749 | -2.089 | -1.765 | -4.860 | -4.381 | -4.703 | 319192 | HIST2H2AA3 HIST2NM | NM_178212_3_-1       |
| Hist2h2aa2    | -4.025 | -3.760 | -4.443 | -4.736 | -3.494 | -4.868 | -3.078 | -4.882 | -4.350 | -4.707 | 319192 | HIST2H2AA3 HIST2NM | NM_178212_dup1_3_+1  |
| Hist2h2ab     | -2.538 | -1.114 | -1.009 | -1.206 | -1.538 | -1.547 | -1.359 | -2.720 | -1.551 | -2.338 | 621893 | HIST2H2AB          | NM_178213_3_+1       |
| Hist2h2be     | 4.631  | 3.389  | 2.845  | 1.911  | 2.564  | 2.146  | 2.597  | 1.794  | 2.793  | 2.364  | 319190 | HIST1H2BJ          | NM_178214_3_+1       |
| Hist2h3b      | -0.319 | 0.732  | -0.395 | -0.624 | 0.866  | 0.247  | 1.284  | -0.148 | 0.751  | -0.026 | 319154 | HIST1H3B           | NM_178215_3_+1       |
| Hist2h3c1     | -4.137 | -3.298 | -4.020 | -4.523 | -4.648 | -4.794 | -3.955 | -4.585 | -4.538 | -4.292 | 15077  | HIST1H3C           | NM_178216_3_-1       |
| Hist2h3c1     | -4.137 | -3.298 | -4.052 | -4.365 | -4.640 | -4.841 | -3.955 | -4.585 | -4.538 | -4.292 | 15077  | HIST1H3C           | NM_178216_dup1_3_+1  |

|               |        |        |        |        |        |        |        |        |        |        |        |          |                  |
|---------------|--------|--------|--------|--------|--------|--------|--------|--------|--------|--------|--------|----------|------------------|
| Hist3h2a      | 5.415  | 3.676  | 4.399  | 3.024  | 3.842  | 2.353  | 3.805  | 2.570  | 3.585  | 2.370  | 319162 | HIST3H2A | NM_178218_11_+_1 |
| Arrb1         | 0.052  | 1.163  | 4.437  | 4.714  | 2.764  | 3.462  | 4.620  | 4.859  | 6.077  | 6.413  | 109689 | ARRB1    | NM_178220_7_+_1  |
| Scn3b         | -4.981 | -4.981 | -4.981 | -4.979 | -4.967 | -4.932 | -4.963 | -4.964 | -4.029 | -4.981 | 235281 | SCN3B    | NM_178227_9_+_1  |
| Tnrc18        | 1.444  | 1.524  | 2.752  | 2.353  | 3.341  | 2.797  | 3.174  | 3.383  | 4.075  | 4.219  | 231861 | TNRC18   | NM_178242_5_+_1  |
| Smg5          | 4.277  | 4.001  | 4.718  | 4.572  | 4.806  | 4.453  | 4.394  | 4.312  | 4.408  | 4.199  | 229512 | SMG5     | NM_178246_3_+_1  |
| Arhgap33      | -3.409 | -3.050 | -4.436 | -4.192 | -4.323 | -1.862 | -3.535 | -4.707 | -4.492 | -4.531 | 233071 | ARHGAP33 | NM_178252_7_+_1  |
| Klhdcl1       | 2.677  | 3.126  | 2.058  | 2.378  | 2.028  | 2.977  | 1.827  | 2.331  | 1.755  | 2.456  | 271005 | KLHDC1   | NM_178253_12_+_1 |
| Tcf15         | -3.349 | -4.981 | -4.912 | -4.912 | -4.982 | -4.270 | -4.482 | -4.988 | -4.394 | -4.981 | 277353 | TCFL5    | NM_178254_2_+_1  |
| Reps2         | -4.981 | -4.981 | -4.934 | -2.478 | -4.512 | -3.048 | -3.324 | -2.283 | -2.401 | -1.204 | 194590 | REPS2    | NM_178256_X_+_1  |
| Il22ra2       | -4.981 | -4.981 | -1.617 | -0.858 | -2.322 | -4.232 | -4.261 | -2.636 | -0.663 | 0.102  | 237310 | IL22RA2  | NM_178258_10_+_1 |
| Abca13        | -1.884 | -4.981 | 0.395  | 1.732  | -1.759 | -0.058 | -3.003 | -1.392 | 1.154  | -1.689 | 268379 | ABCA13   | NM_178259_11_+_1 |
| Ankrd27       | 3.265  | 3.040  | 1.898  | 2.510  | 2.838  | 2.581  | 2.095  | 1.675  | 1.022  | 1.483  | 245886 | ANKRD27  | NM_178263_7_+_1  |
| Zfp827        | -3.371 | 0.848  | -4.938 | -1.672 | -3.325 | -2.292 | -3.892 | -1.760 | -4.553 | -2.547 | 622675 | ZNF827   | NM_178267_8_+_1  |
| Cenpm         | -3.319 | -4.981 | -2.317 | -2.901 | -2.924 | -2.960 | -3.463 | -3.471 | -3.740 | -1.612 | 66570  | CENPM    | NM_178269_15_+_1 |
| Hmgxb3        | 2.257  | 0.464  | 2.482  | 2.379  | 2.592  | 2.082  | 2.274  | 2.044  | 3.719  | 4.278  | 106894 | HMGXB3   | NM_178277_18_+_1 |
| Pxk           | -0.610 | -0.439 | -0.352 | -1.145 | 0.269  | -0.117 | 0.418  | 0.291  | 0.841  | 0.240  | 218699 | PXK      | NM_178279_14_+_1 |
| Trim39        | 3.898  | 3.562  | 3.065  | 3.108  | 3.805  | 3.939  | 3.517  | 3.496  | 3.820  | 4.066  | 79263  | TRIM39   | NM_178281_17_+_1 |
| Asb13         | 4.961  | 4.946  | 4.418  | 3.883  | 3.494  | 3.458  | 3.989  | 4.152  | 4.583  | 4.654  | 142688 | ASB13    | NM_178283_13_+_1 |
| Brip1         | -0.549 | -1.236 | 2.275  | 1.760  | 3.184  | 1.801  | 2.395  | 1.185  | 1.198  | 1.022  | 237911 | BRIP1    | NM_178309_11_+_1 |
| Tbce          | 4.810  | 4.787  | 4.761  | 4.762  | 4.543  | 4.571  | 4.603  | 4.293  | 4.415  | 3.990  | 70430  | TBCE     | NM_178337_13_+_1 |
| Cdc23         | 4.805  | 4.935  | 4.838  | 5.266  | 5.068  | 5.340  | 4.964  | 5.272  | 4.931  | 5.348  | 52563  | CDC23    | NM_178347_18_+_1 |
| Klf11         | 4.266  | 4.742  | 2.427  | 2.879  | 2.754  | 2.910  | 3.840  | 4.153  | 5.653  | 5.625  | 194655 | KLF11    | NM_178357_12_+_1 |
| Lhfp11        | 2.819  | 1.014  | -4.981 | -4.981 | -4.769 | -4.970 | -4.960 | -4.942 | -4.981 | -4.981 | 237091 | LHFP11   | NM_178358_X_+_1  |
| Sorbs1        | -4.981 | -1.363 | -3.526 | -2.400 | -4.697 | -2.581 | -3.489 | -4.045 | -4.981 | -1.558 | 20411  | SORBS1   | NM_178362_19_+_1 |
| Ylpm1         | 4.184  | 3.901  | 4.236  | 4.150  | 4.586  | 4.479  | 4.417  | 3.931  | 3.934  | 3.747  | 56531  | YLPM1    | NM_178363_12_+_1 |
| Zfp369        | 0.805  | 0.716  | 0.993  | 1.177  | 1.140  | 1.027  | 0.617  | 1.583  | 0.807  | 2.250  | 170936 | ZNF274   | NM_178364_13_+_1 |
| Pacsin1       | 0.784  | 2.750  | -3.396 | -4.539 | -3.825 | -3.500 | -4.925 | -4.856 | -4.981 | -4.418 | 23969  | PACIN1   | NM_178365_17_+_1 |
| Dhx33         | 3.360  | 3.125  | 4.428  | 4.317  | 3.930  | 3.846  | 4.099  | 4.098  | 4.193  | 4.374  | 216877 | DHX33    | NM_178367_11_+_1 |
| Prss34        | -4.981 | -4.981 | -4.896 | -1.906 | -4.960 | -4.960 | 5.289  | -4.514 | -4.981 | -4.981 | 328780 | NA       | NM_178372_17_+_1 |
| Snupn         | 4.202  | 4.276  | 3.874  | 4.127  | 4.154  | 4.110  | 4.318  | 4.202  | 2.703  | 2.647  | 66069  | SNUPN    | NM_178374_9_+_1  |
| Zswim3        | 1.944  | 1.233  | 1.319  | 1.035  | 2.619  | 2.820  | 1.981  | 1.738  | 2.103  | 2.579  | 67538  | ZSWIM3   | NM_178375_2_+_1  |
| Rraga         | 6.159  | 6.301  | 6.914  | 6.936  | 6.015  | 6.057  | 5.789  | 6.095  | 5.400  | 5.745  | 68441  | RRAGA    | NM_178376_4_+_1  |
| Commdd10      | 5.494  | 5.346  | 6.057  | 6.112  | 5.640  | 5.727  | 5.186  | 5.207  | 5.026  | 4.957  | 69456  | COMMDD10 | NM_178377_18_+_1 |
| Iqcg          | 1.825  | 0.338  | -1.928 | -1.744 | -4.549 | -2.044 | -3.472 | -2.549 | -4.981 | -3.720 | 69707  | IQCG     | NM_178378_16_+_1 |
| Cox10         | 4.455  | 4.345  | 3.817  | 3.932  | 4.084  | 3.888  | 3.998  | 3.849  | 3.556  | 3.386  | 70383  | COX10    | NM_178379_11_+_1 |
| Dhx38         | 3.916  | 3.736  | 4.753  | 4.861  | 4.606  | 4.397  | 4.809  | 4.758  | 5.899  | 5.678  | 64340  | DHX38    | NM_178380_8_+_1  |
| Flrt3         | -4.981 | -4.981 | -4.963 | -1.247 | -0.417 | -3.733 | -2.848 | -4.347 | -4.981 | -3.210 | 71436  | FLRT3    | NM_178382_2_+_1  |
| Zfp74         | 3.374  | 3.727  | 2.714  | 3.102  | 2.381  | 3.307  | 2.267  | 2.601  | 2.600  | 2.640  | 72723  | ZNF569   | NM_178384_7_+_1  |
| Tbcc          | 5.605  | 5.597  | 5.072  | 5.288  | 4.631  | 4.753  | 4.675  | 4.708  | 4.405  | 4.425  | 72726  | TBCC     | NM_178385_17_+_1 |
| Slc25a31      | -1.039 | -4.981 | -3.789 | -4.938 | -4.191 | -3.892 | -4.966 | -2.789 | -4.981 | -1.515 | 73333  | SLC25A31 | NM_178386_3_+_1  |
| Tmem202       | -1.812 | -1.084 | -2.165 | -1.567 | -2.721 | -1.992 | -1.250 | -0.885 | -1.168 | -0.609 | 73893  | TMEM202  | NM_178388_9_+_1  |
| Gale          | 5.581  | 5.701  | 4.606  | 4.812  | 4.211  | 4.195  | 3.723  | 3.792  | 3.224  | 2.881  | 74246  | GALE     | NM_178389_4_+_1  |
| Fam53a        | 5.059  | 4.897  | 4.942  | 4.938  | 5.228  | 5.206  | 5.209  | 5.027  | 5.297  | 5.042  | 74504  | FAM53A   | NM_178390_5_+_1  |
| Setmar        | 2.517  | 2.673  | 1.937  | 1.475  | 1.808  | 1.987  | 2.124  | 1.778  | 2.237  | 2.578  | 74729  | NA       | NM_178391_6_+_1  |
| Snapc1        | 4.213  | 3.334  | 4.775  | 3.415  | 3.908  | 3.235  | 3.884  | 3.101  | 3.089  | 2.988  | 75627  | SNAPC1   | NM_178392_12_+_1 |
| Jakmp1        | 4.825  | 4.998  | -1.021 | -0.309 | -0.526 | 0.124  | 0.629  | 1.436  | -1.543 | -2.064 | 76071  | JAKMP1   | NM_178394_5_+_1  |
| Zdhhc2        | 0.723  | 1.750  | 2.887  | 3.907  | 0.034  | 0.947  | -0.366 | 1.979  | -1.742 | 1.030  | 70546  | ZDHHC2   | NM_178395_8_+_1  |
| Car12         | -3.837 | -3.788 | -4.118 | -3.591 | -4.512 | -4.509 | -3.862 | -4.193 | -4.447 | -4.981 | 76459  | CA12     | NM_178396_9_+_1  |
| Faf2          | 5.333  | 5.587  | 5.595  | 5.674  | 5.714  | 5.742  | 5.393  | 5.547  | 5.458  | 5.549  | 76577  | FAF2     | NM_178397_13_+_1 |
| Wipi2         | 4.362  | 4.573  | 4.411  | 4.677  | 4.464  | 4.577  | 4.466  | 4.784  | 5.775  | 5.527  | 74781  | WIP12    | NM_178398_5_+_1  |
| 3110035E14Rik | -4.981 | -4.981 | -4.944 | -3.884 | -4.979 | -4.946 | -4.800 | -4.133 | -4.394 | -3.816 | 76982  | C8orf46  | NM_178399_1_+_1  |
| Ramp1         | 2.113  | 1.519  | 1.412  | -0.112 | -0.475 | -0.890 | -0.384 | -1.271 | -0.887 | -2.432 | 51801  | RAMP1    | NM_178401_1_+_1  |
| Pus7          | 2.575  | 2.398  | 2.353  | 2.933  | 2.183  | 2.218  | 2.365  | 2.857  | 2.172  | 2.253  | 78697  | PUS7     | NM_178403_5_+_1  |
| Zc3h6         | 3.479  | 3.466  | 2.602  | 2.502  | 3.061  | 2.966  | 2.916  | 2.360  | 2.418  | 1.834  | 78751  | ZC3H6    | NM_178404_2_+_1  |
| Atp1a2        | -1.723 | -4.981 | -3.804 | -4.770 | -4.010 | -4.736 | -4.191 | -4.343 | -4.050 | -4.981 | 98660  | ATP1A2   | NM_178405_1_+_1  |
| Gpr153        | -4.981 | -4.981 | -3.897 | -4.745 | -3.412 | -2.877 | -3.424 | -4.876 | -0.788 | -3.758 | 100129 | GPR153   | NM_178406_4_+_1  |
| Arap2         | 3.631  | 3.499  | 4.336  | 4.049  | 7.789  | 7.348  | 5.806  | 4.757  | 1.790  | 0.993  | 212285 | ARAP2    | NM_178407_5_+_1  |
| Arrdc1        | 2.818  | 2.389  | 2.283  | 2.667  | 2.348  | 1.764  | 2.177  | 2.009  | 2.988  | 2.817  | 215705 | ARRDC1   | NM_178408_2_+_1  |
| Marveld2      | -0.601 | -4.981 | -2.111 | -4.740 | -1.037 | -2.895 | -1.742 | -1.820 | -1.549 | -2.265 | 218518 | MARVELD2 | NM_178410_13_+_1 |
| Thnsl2        | 1.227  | -0.325 | -3.646 | -3.062 | -4.581 | -3.413 | -4.590 | -4.952 | -4.098 | -4.981 | 232078 | THNSL2   | NM_178413_6_+_1  |
| Bbs9          | 2.166  | 1.822  | 1.240  | 1.248  | 3.687  | 3.763  | 2.105  | 1.492  | 1.549  | 2.195  | 319845 | BBS9     | NM_178415_9_+_1  |
| Zfp867        | 0.996  | 1.611  | 1.107  | 1.079  | 0.891  | 0.286  | 0.492  | 0.523  | 0.498  | 0.959  | 237775 | ZNF627   | NM_178417_11_+_1 |
| Nlrx1         | 0.249  | -3.050 | -3.846 | -1.639 | 0.411  | 1.135  | -0.557 | -1.562 | 1.947  | 1.842  | 270151 | NLRX1    | NM_178420_9_+_1  |
| Nanos1        | -1.627 | -2.997 | 0.091  | 0.136  | -0.327 | 0.284  | -0.807 | -0.585 | -0.258 | -0.899 | 332397 | NANOS1   | NM_178421_19_+_1 |
| Myo1g         | 5.591  | 5.535  | 7.859  | 7.877  | 8.220  | 7.767  | 8.547  | 8.309  | 9.273  | 9.063  | 246177 | MYO1G    | NM_178440_11_+_1 |
| Egfl7         | -4.950 | -4.769 | -4.883 | -4.559 | -4.970 | -4.322 | -4.944 | -2.761 | -4.865 | -4.968 | 353156 | EGFL7    | NM_178444_2_+_1  |
| Rbm47         | 0.345  | -0.443 | 2.782  | 3.093  | 2.268  | 1.416  | 1.589  | -0.661 | 0.500  | 1.210  | 245945 | RBM47    | NM_178446_5_+_1  |
| Zfp2          | -3.757 | -3.721 | -4.960 | -4.901 | -4.938 | -4.970 | -4.670 | -4.848 | -4.839 | -4.657 | 22678  | ZFP2     | NM_178447_11_+_1 |
| Cpsf4         | -4.214 | -3.871 | -4.762 | -4.873 | -4.926 | -2.647 | -1.653 | -4.874 | -1.875 | -1.028 | 54188  | CPSF4    | NM_178576_5_+_1  |
| Tmem205       | 4.427  | 4.021  | 3.548  | 3.275  | 2.102  | 2.032  | 3.160  | 2.440  | 3.731  | 2.883  | 235043 | TMEM205  | NM_178577_9_+_1  |
| Tnfrsf21      | 1.044  | 0.227  | 6.723  | 6.813  | 4.771  | 4.661  | 6.455  | 7.109  | 8.667  | 8.951  | 94185  | TNFRSF21 | NM_178589_17_+_1 |
| Ikbkg         | 2.577  | 1.193  | 1.758  | 3.060  | 2.570  | 1.680  | 1.222  | 2.575  | 2.313  | 2.412  | 16151  | IKBKG    | NM_178590_X_+_1  |
| Nrg1          | -4.981 | -0.838 | -4.431 | -2.771 | -3.153 | -2.836 | -3.597 | -0.285 | 1.471  | 3.771  | 211323 | NA       | NM_178591_8_+_1  |
| Abhd16a       | 6.196  | 6.196  | 5.715  | 5.884  | 5.495  | 5.634  | 5.526  | 5.711  | 5.869  | 5.682  | 193742 | ABHD16A  | NM_178592_17_+_1 |

|               |          |        |        |        |        |        |        |        |        |        |        |        |          |                 |
|---------------|----------|--------|--------|--------|--------|--------|--------|--------|--------|--------|--------|--------|----------|-----------------|
|               | Rcsd1    | 6.498  | 6.298  | 5.878  | 6.107  | 5.999  | 5.325  | 6.090  | 6.129  | 6.971  | 6.856  | 226594 | RCSD1    | NM_178593_1_-1  |
|               | Pthr1    | 1.853  | 2.276  | 0.900  | 1.187  | 0.010  | 0.558  | 0.512  | 0.749  | -0.300 | -0.373 | 329384 | PTRH1    | NM_178595_2_+1  |
|               | Camk2g   | -2.421 | -3.239 | -3.876 | -4.195 | -4.239 | -4.828 | -3.998 | -4.321 | -2.127 | -4.376 | 12325  | CAMK2G   | NM_178597_14_-1 |
|               | Tagln2   | 10.472 | 10.773 | 8.321  | 8.194  | 7.990  | 7.700  | 8.282  | 8.698  | 9.046  | 8.582  | 21346  | TAGLN2   | NM_178598_1_+1  |
|               | Comm18   | 6.476  | 6.395  | 7.838  | 7.914  | 7.254  | 7.454  | 7.103  | 7.158  | 6.855  | 6.924  | 27784  | COMMMD8  | NM_178599_5_-1  |
|               | Vkorc1   | 6.116  | 6.376  | 4.432  | 4.550  | 4.282  | 4.606  | 4.790  | 5.083  | 3.616  | 3.816  | 27973  | VKORC1   | NM_178600_7_-1  |
|               | Imp4     | 6.369  | 6.080  | 6.058  | 6.283  | 6.143  | 6.049  | 5.972  | 6.154  | 5.767  | 5.822  | 27993  | IMP4     | NM_178601_1_+1  |
|               | Polr2m   | 7.007  | 7.203  | 7.089  | 7.202  | 6.897  | 6.877  | 6.839  | 6.934  | 6.675  | 6.670  | 28015  | POLR2M   | NM_178602_9_-1  |
|               | Mrpl50   | 4.319  | 4.580  | 5.132  | 5.128  | 4.490  | 4.587  | 4.682  | 4.647  | 4.222  | 4.185  | 28028  | MRPL50   | NM_178603_4_-1  |
|               | Txn14a   | 1.297  | 2.150  | 2.480  | 2.477  | 2.137  | 1.461  | 1.111  | 2.139  | 1.739  | 1.827  | 27366  | TXNL4A   | NM_178604_18_+1 |
|               | Nop16    | 5.903  | 6.486  | 5.742  | 6.825  | 6.121  | 7.209  | 6.078  | 6.666  | 4.361  | 5.085  | 28126  | NOP16    | NM_178605_13_-1 |
|               | Reep3    | 5.603  | 5.458  | 5.835  | 5.662  | 6.324  | 6.280  | 6.697  | 6.150  | 6.499  | 6.648  | 28193  | REEP3    | NM_178606_10_-1 |
|               | Rnf24    | -0.125 | 0.617  | 1.359  | 0.959  | 0.326  | -0.161 | -0.410 | -0.304 | 1.079  | 1.476  | 51902  | RNF24    | NM_178607_2_-1  |
|               | Reep1    | -4.981 | 0.293  | -3.670 | -3.366 | -2.597 | -2.161 | -2.796 | -3.046 | -3.351 | -2.965 | 52250  | REEP1    | NM_178608_6_+1  |
|               | E2f7     | -3.563 | -3.267 | 0.849  | -0.253 | 1.926  | 0.582  | 0.628  | -0.318 | 0.382  | -0.629 | 52679  | E2F7     | NM_178609_10_+1 |
|               | Krr1     | 5.171  | 5.195  | 5.470  | 5.574  | 5.758  | 5.784  | 5.499  | 5.279  | 5.180  | 5.182  | 52705  | KRR1     | NM_178610_10_+1 |
|               | Lair1    | 7.261  | 7.194  | 1.178  | 0.961  | 4.199  | 4.175  | 4.114  | 3.382  | 3.270  | 2.914  | 52855  | LAIR1    | NM_178611_7_-1  |
|               | Cnpy4    | 4.049  | 4.997  | 2.903  | 3.617  | 3.719  | 3.899  | 3.823  | 4.003  | 3.779  | 4.028  | 66455  | CNPY4    | NM_178612_5_+1  |
|               | Gskip    | 5.485  | 5.514  | 5.165  | 5.359  | 5.114  | 5.050  | 4.993  | 5.164  | 5.151  | 5.287  | 66787  | GSKIP    | NM_178613_12_+1 |
|               | Samm50   | 6.701  | 6.594  | 6.385  | 6.572  | 6.272  | 6.248  | 6.278  | 6.409  | 6.394  | 6.091  | 68653  | SAMM50   | NM_178614_15_+1 |
|               | Rgmb     | 3.537  | 3.780  | 3.347  | 3.766  | 3.511  | 4.142  | 2.832  | 3.205  | 3.095  | 4.008  | 68799  | RGMB     | NM_178615_17_-1 |
|               | Psmd11   | 6.615  | 6.821  | 6.598  | 6.931  | 6.299  | 6.420  | 6.347  | 6.625  | 6.016  | 5.944  | 69077  | PSMD11   | NM_178616_11_+1 |
|               | Necab1   | -4.981 | -4.981 | -2.701 | -3.038 | -4.978 | -4.978 | -4.981 | -4.981 | -4.981 | -4.981 | 69352  | NECAB1   | NM_178617_4_-1  |
|               | Fam83g   | -4.981 | -4.981 | -1.558 | -1.365 | -2.429 | -2.308 | -3.887 | -4.920 | -4.981 | -4.981 | 69640  | FAM83G   | NM_178618_11_+1 |
| 1810026J23Rik |          | 5.141  | 4.728  | 4.291  | 4.778  | 4.464  | 4.292  | 4.664  | 4.479  | 5.540  | 5.279  | 69773  | C19orf52 | NM_178619_9_+1  |
|               | Mfsd11   | 4.681  | 4.716  | 5.427  | 5.128  | 5.380  | 5.237  | 5.249  | 5.227  | 4.951  | 5.319  | 69900  | MFSD11   | NM_178620_11_+1 |
|               | Suds3    | 5.234  | 5.126  | 5.030  | 5.355  | 5.533  | 5.217  | 5.389  | 5.117  | 5.422  | 5.438  | 71954  | SUDS3    | NM_178622_5_-1  |
|               | Urgcp    | 2.185  | 3.406  | 0.905  | 2.246  | 2.818  | 2.461  | 2.294  | 1.206  | 3.268  | 3.870  | 72046  | URGCP    | NM_178623_11_-1 |
|               | Fbxl2    | -0.590 | 0.621  | -1.427 | -2.158 | -1.631 | -0.640 | -1.456 | 0.177  | 2.386  | 3.387  | 72179  | FBXL2    | NM_178624_9_-1  |
|               | Tmem209  | 4.857  | 4.999  | 4.676  | 4.644  | 4.999  | 4.845  | 4.859  | 4.914  | 4.852  | 4.915  | 72649  | TMEM209  | NM_178625_6_-1  |
|               | Cdc42se2 | 7.547  | 7.503  | 8.189  | 8.053  | 8.017  | 7.657  | 7.899  | 8.007  | 7.898  | 7.973  | 72729  | CDC42SE2 | NM_178626_11_-1 |
|               | Poldip3  | 5.946  | 5.896  | 6.393  | 6.424  | 6.589  | 6.363  | 6.458  | 6.354  | 7.103  | 6.948  | 73826  | POLDIP3  | NM_178627_15_-1 |
|               | Atl1     | 0.350  | 0.658  | 2.042  | 1.463  | -0.825 | -0.284 | -0.567 | -0.647 | -0.826 | -1.787 | 73991  | ATL1     | NM_178628_12_+1 |
|               | Ispd     | 2.177  | 1.892  | 1.041  | 0.990  | -1.869 | -1.127 | -1.552 | -2.033 | -4.847 | -2.828 | 75847  | ISPD     | NM_178629_12_+1 |
|               | Agbl3    | 0.502  | -0.028 | -2.077 | -1.696 | -2.638 | -4.072 | -4.042 | -4.127 | -3.080 | -3.417 | 76223  | AGBL3    | NM_178630_6_+1  |
|               | Ints7    | 4.934  | 4.572  | 4.800  | 4.169  | 4.827  | 4.044  | 4.175  | 3.953  | 4.534  | 4.132  | 77065  | INTS7    | NM_178632_1_+1  |
|               | Klhl2    | 3.407  | 3.791  | 3.467  | 3.615  | 3.533  | 3.688  | 3.991  | 3.930  | 4.901  | 4.845  | 77113  | KLHL2    | NM_178633_8_-1  |
|               | Csrnp3   | -4.447 | -4.981 | -4.913 | -4.744 | -4.979 | -4.981 | -4.752 | -4.955 | -4.981 | -4.795 | 77771  | CSRNP3   | NM_178634_2_+1  |
|               | Uvrage   | 7.664  | 7.659  | 7.172  | 7.138  | 8.216  | 8.394  | 7.659  | 7.138  | 7.098  | 6.869  | 78610  | UVRAG    | NM_178635_7_-1  |
|               | Kat5     | 3.717  | 3.602  | 2.963  | 3.028  | 3.216  | 3.299  | 3.493  | 3.568  | 3.903  | 3.455  | 81601  | KATS     | NM_178637_19_-1 |
|               | Tmem108  | -0.451 | 3.793  | -3.327 | -3.030 | -3.327 | -0.724 | -1.448 | -0.024 | -2.614 | -2.003 | 81907  | TMEM108  | NM_178638_9_-1  |
|               | Sfxn5    | -1.571 | -1.055 | -0.834 | -0.464 | -0.136 | 0.291  | 0.015  | -0.034 | 1.558  | 0.971  | 94282  | SFXN5    | NM_178639_6_-1  |
|               | B3galnt2 | 3.284  | 4.213  | 5.095  | 5.084  | 3.720  | 3.897  | 4.408  | 4.784  | 5.076  | 5.500  | 97884  | B3GALNT2 | NM_178640_13_+1 |
|               | Inpp5f   | 5.136  | 5.320  | 4.221  | 4.417  | 5.146  | 5.387  | 5.414  | 5.919  | 6.234  | 7.272  | 101490 | INPP5F   | NM_178641_7_+1  |
|               | Faap24   | 3.590  | 3.683  | 3.159  | 3.240  | 3.010  | 3.124  | 3.046  | 3.386  | 3.253  | 2.988  | 101831 | FAAP24   | NM_178643_7_-1  |
|               | Oaf      | 3.653  | 1.375  | 1.800  | 0.587  | 1.757  | 0.767  | 1.723  | 1.412  | 1.893  | 0.954  | 102644 | OAF      | NM_178644_9_-1  |
|               | Blmh     | 6.494  | 6.500  | 5.913  | 6.047  | 5.607  | 5.535  | 5.289  | 5.726  | 5.788  | 5.696  | 104184 | BLMH     | NM_178645_11_+1 |
|               | Tigd5    | -0.939 | -0.682 | 0.271  | -0.358 | -0.594 | -1.375 | -1.062 | -0.281 | 1.106  | 1.360  | 105734 | TIGD5    | NM_178646_15_+1 |
|               | Cggbp1   | 6.453  | 6.464  | 6.973  | 6.945  | 6.766  | 6.778  | 7.086  | 6.926  | 7.219  | 7.632  | 106143 | CGGBP1   | NM_178647_16_+1 |
|               | Ubxn8    | 4.299  | 3.658  | 3.821  | 3.789  | 3.836  | 3.615  | 4.456  | 3.693  | 5.459  | 4.116  | 108159 | UBXN8    | NM_178648_8_-1  |
|               | Tbc1d10c | 7.222  | 7.211  | 6.664  | 6.837  | 7.610  | 7.642  | 6.681  | 6.692  | 4.473  | 3.626  | 108995 | TBC1D10C | NM_178650_19_-1 |
|               | Slc30a9  | 5.124  | 5.489  | 4.996  | 5.079  | 4.925  | 5.412  | 5.062  | 5.022  | 5.139  | 5.056  | 109108 | SLC30A9  | NM_178651_5_+1  |
|               | Supt3    | 5.049  | 4.860  | 5.259  | 5.222  | 5.102  | 4.949  | 4.395  | 3.926  | 2.342  | 2.491  | 109115 | SUPT3H   | NM_178652_17_+1 |
|               | Sccpdh   | 3.108  | 3.370  | 2.702  | 3.082  | 2.597  | 2.922  | 2.150  | 2.316  | 1.106  | 1.783  | 109232 | SCCPDH   | NM_178653_1_+1  |
|               | Pkn2     | 5.108  | 5.020  | 5.105  | 5.077  | 5.427  | 5.424  | 5.327  | 5.192  | 5.100  | 5.222  | 109333 | PKN2     | NM_178654_3_-1  |
|               | Ank2     | -3.090 | -4.981 | -4.197 | -4.716 | -3.573 | -4.470 | -3.992 | -1.750 | -3.531 | -0.835 | 109676 | NA       | NM_178655_3_-1  |
|               | Fam65b   | 4.839  | 4.888  | 1.541  | 3.241  | 4.337  | 5.218  | 4.028  | 4.918  | 5.138  | 4.747  | 193385 | FAM65B   | NM_178658_13_+1 |
|               | Jmjd4    | 1.910  | 2.394  | 0.797  | 1.914  | 1.774  | 1.606  | 1.408  | 1.748  | 1.118  | 0.968  | 194952 | JMJD4    | NM_178659_11_+1 |
|               | Creb3l2  | 3.684  | 3.374  | 2.162  | 2.362  | 1.363  | 1.348  | 1.503  | 2.263  | 2.947  | 2.988  | 208647 | CREB3L2  | NM_178661_6_-1  |
|               | Atcay    | -4.981 | -4.981 | -1.964 | -2.546 | -2.242 | -2.145 | -4.351 | -2.409 | -4.981 | -4.981 | 16467  | ATCAY    | NM_178662_10_-1 |
|               | B3gnt1   | 3.051  | 3.326  | 3.341  | 2.960  | 3.761  | 3.510  | 3.470  | 3.035  | 3.249  | 3.238  | 210004 | B3GNTL1  | NM_178664_11_-1 |
|               | Lpp      | 4.408  | 4.338  | 4.630  | 4.483  | 6.190  | 6.381  | 5.614  | 5.174  | 4.056  | 4.866  | 210126 | LPP      | NM_178665_16_+1 |
|               | Themis   | -4.981 | -4.981 | -4.263 | -1.026 | -3.590 | -0.819 | -2.562 | 1.375  | -3.976 | -4.981 | 210757 | THEMIS   | NM_178666_10_+1 |
|               | Tfdp2    | -0.166 | -3.662 | -0.129 | 0.757  | -0.756 | 0.451  | -0.586 | 0.856  | -0.117 | 0.037  | 211586 | TDFP2    | NM_178667_9_+1  |
|               | Pde12    | 4.702  | 4.448  | 4.536  | 4.535  | 4.487  | 4.509  | 4.649  | 4.404  | 4.654  | 4.442  | 211948 | PDE12    | NM_178668_14_-1 |
| 8030462N17Rik |          | 1.988  | 2.965  | 2.591  | 2.992  | 3.197  | 3.271  | 2.523  | 3.003  | 2.322  | 4.360  | 212163 | C18orf25 | NM_178670_18_-1 |
|               | Scf2d    | 1.807  | 2.104  | 1.576  | 0.877  | 1.600  | 1.376  | 1.370  | 1.706  | 1.941  | 2.320  | 212986 | SCFD2    | NM_178672_5_-1  |
|               | Fbxl21   | -0.727 | -0.645 | -1.880 | -2.250 | -0.736 | -1.029 | -1.771 | -3.448 | -3.109 | -3.449 | 213311 | FBXL21   | NM_178674_13_+1 |
|               | Entpd3   | -2.842 | -4.981 | -4.064 | -2.765 | -4.884 | -3.007 | -4.976 | -3.318 | -4.981 | -3.853 | 215446 | ENTPD3   | NM_178676_9_+1  |
|               | Sec22c   | 0.467  | 1.747  | -0.378 | 0.281  | -2.161 | -2.986 | -0.518 | -0.022 | 0.322  | 0.642  | 215474 | SEC22C   | NM_178677_9_-1  |
|               | Zfp365   | -2.164 | -4.981 | -0.164 | -1.969 | 1.998  | 1.472  | -0.301 | -0.687 | -3.738 | -4.981 | 216049 | ZNF365   | NM_178679_10_-1 |
|               | Unc45b   | -4.981 | -4.981 | -3.175 | -4.930 | -2.781 | -2.642 | -2.942 | -4.441 | -4.981 | -4.981 | 217012 | UNC45B   | NM_178680_11_+1 |
|               | Susd6    | 3.927  | 4.224  | 5.137  | 5.141  | 5.761  | 5.687  | 5.592  | 5.878  | 6.199  | 6.578  | 217684 | SUSD6    | NM_178682_12_+1 |
|               | Depdc1b  | -4.981 | -0.597 | -0.396 | 0.774  | 0.259  | 0.414  | 0.278  | 0.586  | 1.072  | 0.692  | 218581 | DEPDC1B  | NM_178683_13_+1 |

|               |        |        |        |        |        |        |        |        |        |        |        |           |                 |
|---------------|--------|--------|--------|--------|--------|--------|--------|--------|--------|--------|--------|-----------|-----------------|
| Mapk1ip1l     | 5.202  | 4.918  | 6.081  | 5.753  | 5.300  | 5.145  | 5.525  | 5.431  | 6.025  | 6.202  | 218975 | MAPK1IP1L | NM_178684_14_+1 |
| Cep120        | 4.368  | 4.221  | 4.937  | 4.661  | 5.240  | 5.271  | 4.860  | 4.612  | 5.147  | 4.728  | 225523 | CEP120    | NM_178686_18_-1 |
| Cd226         | -1.306 | -4.858 | 1.070  | 1.537  | -1.670 | -0.139 | 1.013  | 2.774  | -0.618 | 1.270  | 225825 | CD226     | NM_178687_18_+1 |
| Ablim1        | -4.915 | -4.694 | -4.812 | -4.952 | -4.957 | -4.975 | -4.837 | -4.959 | -4.963 | -4.942 | 226251 | ABLIM1    | NM_178688_19_-1 |
| Eno4          | -4.981 | -4.981 | -1.424 | -1.166 | -3.393 | -3.387 | -1.997 | -3.661 | -4.981 | -2.743 | 226265 | ENO4      | NM_178689_19_+1 |
| Rab3gap1      | 4.703  | 4.806  | 4.410  | 4.364  | 4.576  | 4.417  | 4.407  | 4.392  | 4.351  | 4.457  | 226407 | RAB3GAP1  | NM_178690_1_+1  |
| Yod1          | 2.067  | 2.054  | 2.379  | 2.242  | 2.202  | 1.935  | 2.108  | 2.183  | 2.762  | 2.721  | 226418 | YOD1      | NM_178691_1_+1  |
| C130074G19Rik | -4.981 | -4.981 | -4.980 | -4.980 | -4.850 | -2.806 | -4.197 | -4.309 | -4.981 | -4.981 | 226777 | C1orf115  | NM_178692_1_-1  |
| Coq4          | 3.883  | 3.922  | 2.983  | 3.121  | 2.767  | 3.250  | 2.172  | 2.837  | 1.813  | 1.687  | 227683 | COQ4      | NM_178693_2_+1  |
| Zer1          | -0.144 | -1.143 | -0.263 | -2.799 | -4.453 | -4.703 | -1.510 | -0.335 | -0.620 | -4.622 | 227693 | ZER1      | NM_178694_2_-1  |
| Prrg4         | 3.002  | 1.810  | -0.547 | -1.584 | -1.376 | -1.336 | -2.113 | -2.878 | -4.981 | -4.981 | 228413 | PRRG4     | NM_178695_2_-1  |
| Slc25a44      | 2.935  | 2.705  | 3.038  | 3.250  | 2.197  | 3.214  | 2.566  | 3.052  | 4.904  | 4.624  | 229517 | SLC25A44  | NM_178696_3_-1  |
| Pigv          | 4.256  | 4.781  | 3.788  | 3.974  | 3.785  | 4.014  | 3.119  | 3.895  | 3.725  | 4.338  | 230801 | PIGV      | NM_178698_4_-1  |
| Fndc10        | 0.436  | 0.854  | 0.487  | 0.353  | 2.351  | 1.818  | 1.366  | 0.785  | 0.850  | 0.485  | 230991 | FNDCC10   | NM_178699_4_+1  |
| Grsf1         | 2.997  | 3.652  | 4.159  | 4.310  | 4.278  | 4.222  | 4.078  | 4.112  | 5.268  | 4.949  | 231413 | GRSF1     | NM_178700_5_-1  |
| Lrrc8d        | 3.401  | 2.803  | 2.358  | 2.290  | 1.857  | 2.263  | 2.989  | 2.785  | 4.779  | 5.231  | 231549 | LRRC8D    | NM_178701_5_+1  |
| Radil         | -2.722 | -0.493 | -4.677 | -1.764 | 0.991  | 2.786  | -3.676 | -3.666 | -4.981 | -4.981 | 231858 | RADIL     | NM_178702_5_-1  |
| Slc6a1        | -4.981 | -4.981 | -4.486 | -4.927 | -1.631 | 0.559  | -2.597 | -3.899 | -4.981 | -4.981 | 232333 | SLC6A1    | NM_178703_6_+1  |
| Dpy19l3       | 2.627  | 3.391  | 1.059  | 3.376  | 1.095  | 2.177  | 0.408  | 1.768  | 1.563  | 1.817  | 233115 | DPY19L3   | NM_178704_7_-1  |
| Lu2p2         | -4.981 | -4.981 | -4.981 | -4.981 | -3.824 | -4.421 | -4.913 | -4.185 | -4.981 | -4.981 | 233271 | LUZP2     | NM_178705_7_+1  |
| Siglech       | 12.650 | 13.334 | 5.216  | 4.870  | 1.729  | 3.717  | 0.122  | 3.798  | -1.029 | 0.040  | 233274 | NA        | NM_178706_7_+1  |
| Zfp592        | 4.981  | 4.978  | 4.979  | 4.671  | 5.572  | 5.322  | 5.315  | 5.123  | 6.089  | 5.921  | 233410 | ZNF592    | NM_178707_7_+1  |
| Pcid2         | 4.767  | 4.823  | 4.548  | 4.633  | 4.696  | 4.593  | 4.600  | 4.657  | 4.863  | 4.609  | 234069 | PCID2     | NM_178708_8_-1  |
| Rnf214        | 3.793  | 3.872  | 4.113  | 4.177  | 4.458  | 4.339  | 4.129  | 3.963  | 4.331  | 4.172  | 235315 | RNF214    | NM_178709_9_-1  |
| Sik2          | 1.873  | 1.561  | 2.845  | 2.978  | 2.869  | 2.638  | 2.926  | 2.743  | 3.569  | 3.843  | 235344 | SIK2      | NM_178710_9_-1  |
| Plscr4        | -0.994 | 0.333  | -4.789 | -2.501 | -3.332 | -2.768 | -1.541 | -0.949 | -1.093 | -1.479 | 235527 | PLSCR4    | NM_178711_9_+1  |
| Adgrg2        | -4.226 | -4.981 | -4.845 | -4.783 | -4.975 | -4.979 | -4.947 | -4.955 | -4.778 | -4.981 | 237175 | ADGRG2    | NM_178712_X_+1  |
| Tnpo1         | 3.568  | 3.374  | 5.051  | 4.660  | 4.579  | 4.529  | 3.985  | 4.667  | 5.019  | 5.255  | 238799 | TNPO1     | NM_178716_13_-1 |
| Mief1         | 3.460  | 2.527  | 3.878  | 3.616  | 3.864  | 3.243  | 3.913  | 3.418  | 4.740  | 4.591  | 239555 | MIEF1     | NM_178719_15_+1 |
| Zfp438        | 1.902  | 2.011  | 1.641  | 1.513  | 1.440  | 1.522  | 0.481  | 0.992  | 0.365  | 1.174  | 240186 | ZNF438    | NM_178722_18_-1 |
| Harbi1        | 3.225  | 3.215  | 3.185  | 3.109  | 3.079  | 3.362  | 2.846  | 2.818  | 3.159  | 2.834  | 241547 | HARBI1    | NM_178724_2_+1  |
| Lrrc4c        | -3.636 | -4.120 | -0.779 | -4.469 | -1.364 | -4.794 | -4.341 | -4.930 | -4.981 | -4.981 | 241568 | LRRC4C    | NM_178725_2_+1  |
| Ppm1l         | 2.700  | 3.041  | -0.032 | 0.654  | 0.539  | 1.268  | -0.223 | 1.235  | 0.891  | 1.740  | 242083 | PPM1L     | NM_178726_3_+1  |
| D630039A03Rik | -4.981 | -4.981 | -4.344 | -4.278 | -4.643 | -4.761 | -4.974 | -4.978 | -3.925 | -4.981 | 242484 | C9orf152  | NM_178727_4_-1  |
| Napepld       | -0.135 | -0.064 | 1.503  | 1.909  | 1.910  | 2.273  | 0.606  | 0.262  | 0.628  | 0.450  | 242864 | NAPEPLD   | NM_178728_5_-1  |
| Fbxl5         | 4.206  | 4.780  | 4.167  | 3.789  | 3.327  | 3.353  | 3.148  | 3.301  | 4.273  | 3.642  | 242960 | FBXL5     | NM_178729_5_-1  |
| Zfp324        | 2.319  | 2.132  | 2.489  | 2.425  | 2.677  | 2.466  | 1.351  | 1.540  | 2.204  | 2.139  | 243834 | ZNF324    | NM_178732_7_+1  |
| Zfp14         | 1.556  | 1.170  | 0.759  | 0.726  | 0.971  | 0.508  | 1.101  | -0.251 | 1.545  | 0.419  | 243906 | ZFP14     | NM_178733_7_-1  |
| Zfp473        | -2.317 | -2.521 | -3.901 | -2.326 | -2.825 | -3.899 | -2.525 | -3.637 | -2.310 | -4.894 | 243963 | ZNF473    | NM_178734_7_-1  |
| Elmod2        | 3.999  | 4.228  | 2.850  | 3.122  | 2.891  | 3.004  | 3.062  | 3.173  | 4.426  | 4.631  | 244548 | ELMOD2    | NM_178736_8_-1  |
| Prss35        | -2.559 | -2.087 | -3.251 | -4.584 | -3.701 | -4.579 | -4.159 | -4.096 | -3.433 | -3.882 | 244954 | PRSS35    | NM_178738_9_+1  |
| Dcaf12l1      | -4.981 | -4.981 | -3.050 | -3.280 | -4.947 | -3.799 | -4.980 | -4.979 | -4.981 | -4.981 | 245404 | NA        | NM_178739_X_-1  |
| Klhl8         | 2.242  | 1.658  | 2.033  | 2.210  | 3.284  | 2.644  | 2.975  | 2.324  | 2.195  | 2.143  | 246293 | KLHL8     | NM_178741_5_-1  |
| Slc26a11      | 2.087  | 0.643  | 2.910  | 3.029  | 3.181  | 3.694  | 3.668  | 3.510  | 3.971  | 4.026  | 268512 | SLC26A11  | NM_178743_11_+1 |
| Zbtb1         | 4.078  | 4.325  | 4.725  | 4.601  | 4.874  | 4.757  | 4.898  | 4.838  | 5.133  | 5.379  | 268564 | ZBTB1     | NM_178744_12_+1 |
| Tmem229b      | 6.381  | 6.741  | 3.737  | 4.308  | 3.553  | 3.863  | 3.553  | 4.029  | 4.474  | 3.887  | 268567 | TMEM229B  | NM_178745_12_-1 |
| Slc38a9       | 5.474  | 5.777  | 5.041  | 4.695  | 5.315  | 5.451  | 5.190  | 5.064  | 5.338  | 5.310  | 268706 | SLC38A9   | NM_178746_13_+1 |
| Gulo          | -4.981 | -2.587 | -4.981 | -4.981 | -3.976 | -2.093 | -4.952 | -4.967 | -4.981 | -4.981 | 268756 | NA        | NM_178747_14_-1 |
| Ss18l1        | 0.985  | 0.945  | 2.284  | 1.970  | 1.829  | 2.083  | 1.851  | 1.907  | 3.964  | 3.702  | 269397 | SS18L1    | NM_178750_2_+1  |
| Orai2         | 6.095  | 5.993  | 5.370  | 5.431  | 5.840  | 5.971  | 6.027  | 5.893  | 6.566  | 6.429  | 269717 | Orai2     | NM_178751_5_-1  |
| Gdpgp1        | 2.856  | 2.224  | 2.672  | 2.532  | 2.602  | 2.594  | 2.146  | 2.237  | 2.991  | 2.728  | 269952 | GDPGP1    | NM_178752_7_+1  |
| Arhgap6       | 4.221  | 4.395  | 2.966  | 3.299  | 6.338  | 7.224  | 4.376  | 3.773  | 2.812  | 3.042  | 11856  | ARHGAP6   | NM_178754_X_+1  |
| Agbl2         | -4.981 | -2.681 | -0.846 | 0.076  | -3.581 | -1.709 | -4.936 | -3.199 | -4.981 | -4.981 | 271813 | AGBL2     | NM_178755_2_+1  |
| Irf2bp1       | 3.830  | 3.735  | 3.825  | 3.991  | 3.842  | 3.903  | 3.827  | 3.872  | 4.272  | 4.252  | 272359 | IRF2BP1   | NM_178757_7_+1  |
| Timd4         | 2.475  | -0.167 | 1.655  | 1.627  | 1.254  | 0.052  | 0.553  | 3.139  | -0.103 | -0.822 | 276891 | TIMD4     | NM_178759_11_+1 |
| Gpr107        | 5.176  | 5.340  | 5.164  | 5.259  | 5.322  | 5.462  | 5.288  | 5.392  | 5.632  | 5.732  | 277463 | GPR107    | NM_178760_2_+1  |
| Zfp672        | 0.426  | -1.463 | 0.065  | -0.426 | -1.060 | -0.536 | 0.289  | -0.586 | 0.272  | 0.630  | 319475 | ZNF672    | NM_178761_11_-1 |
| Pced1a        | 3.035  | 3.160  | 1.616  | 2.171  | 2.053  | 2.673  | 1.765  | 2.129  | 1.829  | 2.798  | 319513 | PCED1A    | NM_178762_2_-1  |
| Zfp750        | -0.584 | -1.150 | -0.780 | -1.698 | -0.794 | -1.828 | -1.982 | -2.793 | -1.523 | -1.703 | 319530 | ZNF750    | NM_178763_11_-1 |
| Fam168a       | 4.119  | 4.587  | 5.578  | 6.345  | 4.730  | 5.471  | 4.800  | 5.356  | 4.829  | 5.476  | 319604 | FAM168A   | NM_178764_7_+1  |
| Slc25a40      | 1.591  | 2.868  | 1.805  | 3.031  | 2.352  | 3.484  | 2.258  | 2.676  | 2.320  | 2.482  | 319653 | SLC25A40  | NM_178766_5_+1  |
| Agmo          | 1.316  | 2.200  | 2.170  | 1.693  | 1.469  | 1.879  | 0.819  | 0.655  | -0.775 | 0.896  | 319660 | AGMO      | NM_178767_12_+1 |
| Tmem72        | -4.981 | -4.981 | -4.958 | -2.945 | -4.938 | -2.856 | -4.969 | -4.976 | -4.981 | -4.227 | 319776 | TMEM72    | NM_178768_6_-1  |
| Klhl26        | 2.802  | 2.978  | 1.256  | 2.480  | 1.273  | 1.779  | 1.615  | 1.918  | 2.998  | 2.536  | 234378 | KLHL26    | NM_178771_8_-1  |
| Nceh1         | 7.433  | 7.853  | 4.151  | 4.282  | 4.593  | 4.462  | 4.851  | 5.280  | 5.953  | 6.389  | 320024 | NCEH1     | NM_178772_3_+1  |
| Prr18         | -4.981 | -1.810 | -2.759 | -2.719 | -4.906 | -4.119 | -4.544 | -3.653 | -4.320 | -1.119 | 320111 | PRR18     | NM_178774_17_+1 |
| Rps6kc1       | 2.208  | 1.780  | 4.128  | 4.088  | 3.863  | 3.883  | 3.812  | 3.919  | 4.283  | 4.346  | 320119 | RP56KC1   | NM_178775_1_-1  |
| BC049715      | -1.860 | -2.587 | -2.172 | -3.373 | -0.783 | -2.737 | -1.092 | -4.345 | -0.887 | -4.342 | 320135 | C12orf60  | NM_178776_6_+1  |
| Nhlh2         | -4.981 | -4.981 | -4.976 | -4.882 | -4.940 | -4.778 | -4.161 | -4.601 | -4.981 | -4.981 | 18072  | NHLH2     | NM_178777_3_+1  |
| Scai          | 3.294  | 3.589  | 3.501  | 3.650  | 3.193  | 3.102  | 2.848  | 2.593  | 1.971  | 2.199  | 320271 | SCAI      | NM_178778_2_-1  |
| Rnf152        | -3.774 | -4.110 | -3.933 | -4.272 | -4.924 | -4.871 | -4.740 | -4.847 | -4.981 | -4.981 | 320311 | RNF152    | NM_178779_1_-1  |
| Bcorl1        | -2.388 | -0.514 | -0.636 | -0.285 | -1.403 | -1.466 | -0.019 | -0.492 | 1.172  | 0.900  | 320376 | BCORL1    | NM_178782_X_+1  |
| Rasal3        | 5.818  | 6.005  | 4.589  | 4.866  | 5.980  | 6.238  | 5.240  | 5.726  | 5.204  | 5.243  | 320484 | RASAL3    | NM_178785_17_-1 |
| Iffo1         | -0.957 | 1.160  | -1.933 | -4.579 | -1.251 | -1.288 | 0.920  | -3.078 | 0.473  | -2.529 | 320678 | IFFO1     | NM_178787_6_+1  |

|               |        |        |        |        |        |        |        |        |        |        |        |          |                 |
|---------------|--------|--------|--------|--------|--------|--------|--------|--------|--------|--------|--------|----------|-----------------|
| Dctd          | -0.922 | -0.728 | -0.282 | -1.473 | -0.290 | -1.068 | -0.588 | -1.512 | -4.815 | -4.981 | 320685 | DCTD     | NM_178788_8_+1  |
| Abi3bp        | -4.981 | -4.981 | -4.981 | -4.974 | -4.906 | -3.672 | -4.887 | -3.803 | -4.981 | -4.948 | 320712 | NA       | NM_178790_16_+1 |
| Vstm4         | 1.222  | -2.239 | -0.379 | -0.058 | 0.744  | -0.775 | 0.079  | 1.039  | -1.263 | -4.316 | 320736 | VSTM4    | NM_178791_14_+1 |
| Zrsr2         | 5.302  | 5.387  | 4.641  | 4.710  | 4.845  | 4.873  | 4.596  | 4.462  | 3.546  | 3.619  | 22184  | ZRSR2    | NM_178794_X_-1  |
| Ppip5k1       | 2.426  | 3.004  | 3.114  | 3.596  | 3.051  | 3.360  | 2.717  | 3.248  | 2.665  | 3.468  | 327655 | PPIP5K1  | NM_178795_2_-1  |
| A530064D06Rik | 5.929  | 5.917  | 1.749  | 3.711  | 3.826  | 3.466  | 3.037  | 3.266  | 5.402  | 4.459  | 328830 | NA       | NM_178796_17_-1 |
|               | 2.405  | 2.725  | 1.936  | 1.327  | 1.833  | 1.369  | 2.175  | 1.433  | 1.786  | 2.022  | 330450 | FAR2     | NM_178797_6_+1  |
| Slc7a6        | 5.685  | 5.533  | 4.371  | 4.535  | 3.997  | 4.193  | 4.393  | 4.157  | 3.679  | 3.572  | 330836 | SLC7A6   | NM_178798_8_+1  |
| Acad12        | 0.996  | 0.041  | -0.227 | 0.668  | -0.239 | 0.365  | 0.376  | 0.895  | 1.270  | 0.881  | 338350 | NA       | NM_178799_5_-1  |
| Tmem241       | -1.109 | -4.059 | 0.161  | -1.943 | 0.031  | 0.063  | -0.846 | -0.620 | -0.576 | 0.302  | 338363 | TMEM241  | NM_178801_18_-1 |
| Trim65        | 2.631  | 2.687  | 1.897  | 1.822  | 2.180  | 2.260  | 2.374  | 2.248  | 3.354  | 3.113  | 338364 | TRIM65   | NM_178802_11_-1 |
| Aebp2         | 2.993  | 2.764  | 4.466  | 4.568  | 5.661  | 5.666  | 4.653  | 4.066  | 1.973  | 3.255  | 11569  | AEBP2    | NM_178803_6_+1  |
| Trappc12      | 2.309  | 3.371  | 3.935  | 3.815  | 4.103  | 3.936  | 3.688  | 3.889  | 3.751  | 4.058  | 217449 | TRAPPC12 | NM_178811_12_-1 |
| Epsti1        | 2.890  | 2.293  | 4.095  | 4.299  | 2.801  | 2.287  | 2.287  | 1.784  | 1.419  | 1.419  | 108670 | EPSTI1   | NM_178825_14_+1 |
| Zfp277        | 5.766  | 5.581  | 5.467  | 5.275  | 5.444  | 5.418  | 5.355  | 5.224  | 5.185  | 5.207  | 246196 | ZNF277   | NM_178845_12_-1 |
| Sirt5         | 3.471  | 3.444  | 2.054  | 2.032  | 2.278  | 2.615  | 1.477  | 1.078  | 0.369  | 0.278  | 68346  | SIRT5    | NM_178848_13_+1 |
| Vps39         | 5.243  | 5.055  | 5.183  | 5.204  | 5.415  | 5.253  | 5.385  | 4.830  | 5.449  | 4.750  | 269338 | VPS39    | NM_178851_2_-1  |
| Cnot6l        | 4.641  | 4.347  | 3.459  | 4.242  | 4.395  | 4.663  | 4.685  | 4.507  | 4.759  | 5.328  | 231464 | CNOT6L   | NM_178854_5_-1  |
| Gins2         | 2.795  | 2.192  | 3.729  | 3.834  | 3.896  | 3.463  | 3.533  | 3.421  | 1.376  | 1.048  | 272551 | GIN52    | NM_178856_8_-1  |
| Ttll1         | 2.831  | 3.313  | 0.425  | 1.608  | 2.075  | 1.646  | 1.350  | 2.385  | 2.491  | 2.377  | 319953 | TTLL1    | NM_178869_15_-1 |
| Hs3st3a1      | 2.021  | 1.417  | -4.979 | -4.950 | -4.947 | -4.484 | -4.767 | -4.800 | -4.981 | -4.981 | 15478  | HS3ST3A1 | NM_178870_11_+1 |
| Trim36        | -4.813 | -4.645 | -4.319 | -4.648 | -4.067 | -4.924 | -4.662 | -3.512 | -4.456 | -4.596 | 28105  | TRIM36   | NM_178872_18_-1 |
| Adck2         | 4.813  | 4.960  | 4.687  | 4.650  | 4.995  | 5.041  | 4.825  | 4.869  | 5.079  | 5.088  | 57869  | ADCK2    | NM_178873_6_+1  |
| Tmcc2         | -4.981 | 1.792  | 1.465  | 3.201  | 3.099  | 3.787  | 2.917  | 2.704  | 2.277  | 2.203  | 68875  | TMCC2    | NM_178874_1_-1  |
| Zfp935        | 4.235  | 3.973  | 4.063  | 3.616  | 3.861  | 3.719  | 3.410  | 3.440  | 3.061  | 3.754  | 71508  | NA       | NM_178875_13_-1 |
| Ints3         | 2.224  | 2.001  | 1.343  | 2.559  | 2.007  | 2.078  | 1.779  | 0.158  | 1.511  | 3.184  | 229543 | INTS3    | NM_178876_3_-1  |
| Hadha         | 4.969  | 4.924  | 5.304  | 5.385  | 5.346  | 5.269  | 5.380  | 5.426  | 5.278  | 5.349  | 97212  | HADHA    | NM_178878_5_-1  |
| B3gnt9        | 3.008  | 3.168  | -3.111 | -4.965 | -3.369 | -4.280 | -2.147 | -0.833 | -1.980 | -2.699 | 97440  | B3GNT9   | NM_178879_8_-1  |
| Son           | 8.637  | 8.812  | 8.341  | 8.236  | 8.709  | 8.837  | 8.715  | 8.550  | 7.898  | 7.895  | 20658  | SON      | NM_178880_16_+1 |
| D2hgdh        | 3.387  | 2.854  | 3.485  | 2.851  | 3.845  | 3.340  | 3.726  | 3.087  | 3.873  | 3.777  | 98314  | D2HGDH   | NM_178882_1_+1  |
| Gorab         | 3.136  | 3.097  | 2.830  | 3.083  | 3.227  | 3.048  | 3.289  | 3.100  | 3.520  | 3.759  | 98376  | GORAB    | NM_178883_1_-1  |
| Al182371      | -2.216 | -4.981 | -2.754 | -3.210 | -2.564 | -3.620 | -1.597 | -3.881 | -4.981 | -4.771 | 98870  | NA       | NM_178885_2_-1  |
| Ldlrad3       | 4.899  | 4.232  | 2.443  | 2.222  | 0.724  | -0.409 | 4.861  | 5.101  | 8.096  | 7.787  | 241576 | LDLRAD3  | NM_178886_2_-1  |
| Garnl3        | 2.039  | 2.865  | -1.210 | -0.608 | -1.475 | -3.555 | -1.197 | -1.342 | -1.410 | -2.574 | 99326  | GARNL3   | NM_178888_2_-1  |
| Abtb2         | 1.499  | 0.870  | 0.978  | 1.079  | 0.653  | 1.274  | 1.562  | 1.762  | 3.269  | 2.485  | 99382  | ABTB2    | NM_178890_2_+1  |
| Prmt6         | 3.749  | 4.242  | 3.893  | 4.122  | 2.976  | 3.308  | 2.681  | 3.180  | 2.926  | 2.716  | 99890  | PRMT6    | NM_178891_3_-1  |
| Tiparp        | 5.164  | 5.206  | 5.725  | 5.505  | 5.979  | 5.947  | 5.844  | 5.842  | 6.337  | 6.194  | 99929  | TIPARP   | NM_178892_3_+1  |
| Coro2a        | -0.800 | -3.454 | -1.050 | -2.395 | -0.277 | -0.545 | -1.442 | -1.956 | -0.743 | -4.557 | 107684 | CORO2A   | NM_178893_4_-1  |
| AA792892      | -4.981 | -4.981 | -4.634 | -4.384 | -4.316 | -4.502 | -3.801 | -4.537 | -4.981 | -3.435 | 100554 | NA       | NM_178894_5_+1  |
| Dcun1d4       | 3.732  | 2.929  | 2.534  | 1.306  | 2.090  | 1.882  | 2.298  | 1.322  | 2.467  | 1.891  | 100737 | DCUN1D4  | NM_178896_5_+1  |
| Tyw1          | -0.555 | 0.734  | -0.267 | -0.464 | -0.672 | -0.285 | -1.041 | -0.527 | 0.990  | 1.069  | 100929 | TYW1     | NM_178897_5_+1  |
| Zfp956        | 3.933  | 3.547  | 3.580  | 3.255  | 4.045  | 3.786  | 3.462  | 3.144  | 2.761  | 2.588  | 101197 | NA       | NM_178898_6_+1  |
| Hepacam2      | -1.014 | -1.991 | 7.489  | 7.511  | -1.655 | 1.640  | 1.166  | 4.880  | -1.218 | 1.750  | 101202 | HEPACAM2 | NM_178899_6_-1  |
| Prkd2         | 2.523  | 2.541  | 2.706  | 2.721  | 4.148  | 4.471  | 3.249  | 3.455  | 2.342  | 2.071  | 101540 | PRKD2    | NM_178900_7_+1  |
| Al467606      | 7.729  | 7.269  | 6.597  | 5.824  | 5.951  | 5.622  | 6.189  | 6.224  | 7.539  | 6.826  | 101602 | C16orf54 | NM_178901_7_+1  |
| Mapkapk3      | 3.450  | 3.724  | 5.147  | 4.017  | 5.283  | 4.663  | 6.391  | 5.864  | 7.473  | 6.699  | 102626 | MAPKAPK3 | NM_178907_9_-1  |
| Fam26e        | -4.981 | -4.981 | -4.963 | -4.963 | -4.884 | -4.523 | -4.905 | -4.555 | -4.981 | -2.993 | 103511 | FAM26E   | NM_178908_10_-1 |
| Wdr92         | 4.806  | 4.794  | 4.880  | 4.055  | 4.481  | 4.398  | 4.622  | 3.981  | 4.202  | 4.014  | 103784 | WDR92    | NM_178909_11_+1 |
| Pld4          | 10.919 | 10.989 | 9.339  | 9.565  | 9.976  | 9.864  | 9.785  | 9.965  | 10.677 | 10.795 | 104759 | PLD4     | NM_178911_12_+1 |
| Fancm         | 0.794  | 1.562  | 1.508  | 2.119  | 2.353  | 2.384  | 1.642  | 1.991  | 1.520  | 1.853  | 104806 | FANCM    | NM_178912_12_+1 |
| Spata7        | 2.647  | 1.663  | 0.472  | 0.792  | -0.279 | 0.187  | -0.626 | 0.038  | -0.801 | -0.223 | 104871 | SPATA7   | NM_178914_12_+1 |
| Rfesd         | 5.168  | 4.573  | 3.729  | 2.991  | 3.826  | 3.319  | 3.651  | 3.259  | 3.204  | 3.072  | 218341 | RFESD    | NM_178916_13_-1 |
| Utp15         | 4.052  | 4.277  | 4.629  | 4.594  | 4.681  | 4.434  | 4.385  | 4.652  | 4.773  | 4.334  | 105372 | UTP15    | NM_178918_13_-1 |
| Lmf2          | 5.028  | 4.865  | 5.034  | 5.084  | 4.961  | 5.062  | 4.727  | 4.779  | 4.516  | 4.900  | 105847 | LMF2     | NM_178919_15_-1 |
| Mal2          | -4.981 | -4.981 | -4.981 | -4.981 | -3.245 | 0.888  | -3.298 | -2.493 | -3.750 | -4.981 | 105853 | MAL2     | NM_178920_15_+1 |
| Hic2          | 0.401  | 1.213  | 1.063  | 0.933  | 1.309  | 0.701  | 1.206  | 1.132  | 1.626  | 1.564  | 58180  | HIC2     | NM_178922_16_+1 |
| Scaf4         | 3.710  | 3.514  | 4.450  | 4.293  | 4.346  | 4.141  | 4.430  | 3.981  | 4.873  | 4.486  | 224432 | SCAF4    | NM_178923_16_-1 |
| Upk1b         | -1.623 | -4.981 | -2.393 | -3.173 | -4.962 | -3.033 | -2.728 | -3.131 | -4.981 | -4.981 | 22268  | UPK1B    | NM_178924_16_-1 |
| Nsun3         | 2.954  | 2.913  | 2.324  | 2.187  | 2.421  | 1.987  | 2.124  | 2.378  | 3.083  | 2.935  | 106338 | NSUN3    | NM_178925_16_-1 |
| Vmac          | 3.048  | 1.835  | 0.441  | 0.668  | -0.522 | 0.962  | 0.326  | -0.061 | 0.171  | 1.534  | 106639 | VMAC     | NM_178926_17_-1 |
| Afap1l1       | -4.981 | -4.981 | -4.961 | -4.587 | -4.739 | -3.995 | -1.583 | -2.942 | -0.728 | -1.270 | 106877 | AFAP1L1  | NM_178928_18_-1 |
| Kazald1       | -0.381 | -0.559 | -0.898 | -1.331 | -4.069 | -3.362 | -2.088 | -3.194 | -1.903 | -1.774 | 107250 | KAZALD1  | NM_178929_19_+1 |
| Gbf1          | 4.883  | 4.879  | 5.342  | 5.457  | 5.553  | 5.561  | 5.017  | 5.118  | 5.231  | 5.368  | 107338 | GBF1     | NM_178930_19_+1 |
| Tnfrsf14      | 1.666  | 3.594  | 1.843  | 3.993  | 1.543  | 3.614  | 0.059  | 3.513  | 1.065  | 4.080  | 230979 | TNFRSF14 | NM_178931_4_-1  |
| Aoc2          | -1.373 | -0.638 | 0.096  | 0.078  | -0.341 | -0.562 | 0.076  | -1.200 | -0.023 | -0.124 | 237940 | AOC2     | NM_178932_11_+1 |
| Slc2a12       | -4.981 | -4.981 | -4.931 | -4.931 | -4.843 | -4.877 | -4.896 | -4.779 | -3.088 | -4.981 | 353169 | SLC2A12  | NM_178934_10_+1 |
| Txlng         | 3.581  | 3.374  | 2.978  | 2.742  | 3.182  | 3.010  | 3.524  | 3.502  | 3.491  | 3.978  | 353170 | TXLNG    | NM_178935_X_-1  |
| Tmem56        | -1.626 | -0.442 | -2.913 | -0.619 | -4.861 | -0.426 | -2.231 | 0.557  | -4.981 | -0.457 | 99887  | TMEM56   | NM_178936_3_-1  |
| Pdrg1         | 6.779  | 6.858  | 6.348  | 6.118  | 6.396  | 6.125  | 5.988  | 5.745  | 4.752  | 4.981  | 68559  | PDRG1    | NM_178939_2_-1  |
| Il17rc        | -2.639 | -0.629 | -4.268 | -1.011 | -2.286 | -4.131 | -3.286 | -0.880 | -3.589 | -0.559 | 171095 | IL17RC   | NM_178942_6_+1  |
| Atad3a        | 4.402  | 4.433  | 4.834  | 4.988  | 4.665  | 4.651  | 4.485  | 4.740  | 4.265  | 3.965  | 108888 | ATAD3A   | NM_179203_4_-1  |
| Reep4         | 5.205  | 5.396  | 4.567  | 4.873  | 5.028  | 4.961  | 4.896  | 4.937  | 4.809  | 4.643  | 72549  | REEP4    | NM_180588_14_+1 |
| Mfap3         | 5.530  | 5.708  | 6.061  | 6.178  | 5.718  | 6.164  | 5.829  | 6.302  | 6.430  | 6.557  | 216760 | MFAP3    | NM_180599_11_+1 |
| Ube2q2        | 6.179  | 6.203  | 5.472  | 5.501  | 4.644  | 5.051  | 4.928  | 5.342  | 5.600  | 6.108  | 109161 | UBE2Q2   | NM_180600_9_+1  |

|               |        |        |        |        |        |        |        |        |        |        |        |           |                 |
|---------------|--------|--------|--------|--------|--------|--------|--------|--------|--------|--------|--------|-----------|-----------------|
| Trappc9       | 4.069  | 4.109  | 4.930  | 5.002  | 4.672  | 4.556  | 4.563  | 4.172  | 4.811  | 4.922  | 76510  | TRAPPC9   | NM_180662_15_-1 |
| Gars          | 5.193  | 5.494  | 6.399  | 6.302  | 5.764  | 5.663  | 5.995  | 6.060  | 6.543  | 5.986  | 353172 | GARS      | NM_180678_6_+1  |
| Ndrgr3        | -1.174 | 0.165  | 0.335  | 1.169  | -0.431 | 0.239  | -0.068 | 0.629  | 0.574  | -0.208 | 29812  | NDRG3     | NM_180956_2_-1  |
| Terb1         | -4.981 | -4.981 | -4.070 | -2.041 | -3.948 | -4.593 | -4.557 | -2.206 | -4.981 | -3.498 | 320022 | TERB1     | NM_180958_8_-1  |
| Nnat          | -2.533 | -1.704 | -3.581 | -4.282 | -4.746 | -4.511 | -3.737 | -4.494 | -4.981 | -4.452 | 18111  | NNAT      | NM_180960_2_+1  |
| Cyhr1         | 0.358  | -1.619 | -2.128 | -2.148 | -2.931 | -2.946 | -4.786 | -1.582 | -2.853 | -1.442 | 54151  | CYHR1     | NM_180962_15_-1 |
| Foxn2         | 3.784  | 3.788  | 5.487  | 5.709  | 5.480  | 5.504  | 5.702  | 5.739  | 6.292  | 7.023  | 14236  | FOXN2     | NM_180974_17_+1 |
| Adgrl1        | -0.152 | 0.047  | -0.062 | 0.179  | 2.480  | 2.347  | 0.778  | 0.311  | -1.107 | -1.367 | 330814 | ADGRL1    | NM_181039_8_+1  |
| Atpaf1        | 5.567  | 5.525  | 4.273  | 4.500  | 4.614  | 4.674  | 4.160  | 4.190  | 3.489  | 3.686  | 230649 | ATPAF1    | NM_181040_4_+1  |
| Caln1         | -4.981 | -4.981 | -4.981 | -4.981 | -4.933 | -4.029 | -4.968 | -4.975 | -4.981 | -4.981 | 140904 | CALN1     | NM_181045_5_+1  |
| Ncmap         | -4.981 | -4.799 | -4.980 | -4.974 | -4.551 | -4.553 | -4.894 | -3.659 | -2.288 | -4.973 | 230822 | NCMAP     | NM_181047_4_-1  |
| A130010J15Rik | 2.771  | 2.455  | 2.076  | 2.826  | 2.023  | 1.353  | 1.746  | 2.117  | 2.150  | 2.386  | 319266 | C1orf74   | NM_181048_1_+1  |
| Zbtb20        | 3.721  | 3.622  | 2.613  | 2.398  | 2.962  | 2.931  | 2.803  | 2.770  | 2.855  | 2.696  | 56490  | ZBTB20    | NM_181058_16_+1 |
| Cenpk         | -4.780 | -4.572 | -3.654 | -3.607 | -1.498 | -3.264 | -2.975 | -3.346 | -2.740 | -4.981 | 60411  | CENPK     | NM_181061_13_+1 |
| Brat1         | 3.300  | 2.846  | 2.895  | 3.434  | 3.691  | 3.664  | 3.185  | 2.575  | 3.994  | 3.643  | 231841 | BRAT1     | NM_181066_5_+1  |
| Rab18         | 7.258  | 7.478  | 6.746  | 6.875  | 6.409  | 6.598  | 6.729  | 6.884  | 6.873  | 7.305  | 19330  | RAB18     | NM_181070_18_+1 |
| Tanc2         | 2.527  | 2.819  | 1.831  | 1.626  | 1.229  | 1.170  | 0.345  | 0.727  | -1.440 | -0.723 | 77097  | TANC2     | NM_181071_11_+1 |
| Myo1e         | -0.909 | -1.925 | -0.867 | 1.959  | 4.417  | 4.985  | 4.687  | 5.058  | -0.581 | 1.183  | 71602  | MYO1E     | NM_181072_9_+1  |
| Plekhh1       | 0.095  | -2.155 | -1.440 | -1.274 | -4.025 | -4.783 | -2.991 | -3.633 | -0.425 | -2.511 | 211945 | PLEKHH1   | NM_181073_12_+1 |
| Lingo1        | -3.843 | -3.267 | -4.969 | -4.746 | -2.429 | -1.664 | -4.964 | -3.448 | -4.981 | -4.981 | 235402 | LINGO1    | NM_181074_9_-1  |
| 2610524H06Rik | 5.364  | 4.626  | 4.843  | 4.426  | 3.761  | 3.776  | 3.923  | 4.024  | 3.238  | 2.925  | 330173 | NA        | NM_181075_5_-1  |
| Zfp120        | 4.157  | 4.184  | 4.128  | 3.706  | 4.597  | 3.568  | 4.866  | 3.993  | 4.376  | 4.343  | 104348 | NA        | NM_181266_2_-1  |
| Zfp869        | 0.005  | 2.656  | 2.250  | 2.938  | 3.748  | 4.117  | 3.665  | 3.311  | 1.791  | 2.702  | 66869  | ZNF91     | NM_181274_8_-1  |
| Col14a1       | -0.476 | -4.981 | -0.077 | -0.545 | 1.163  | -0.426 | -0.017 | -0.001 | -3.109 | -1.131 | 12818  | COL14A1   | NM_181277_15_+1 |
| B230219D22Rik | 5.454  | 4.830  | 6.452  | 6.192  | 5.499  | 5.432  | 5.866  | 5.838  | 5.992  | 6.540  | 78521  | C5orf24   | NM_181278_13_+1 |
| Bre           | -4.981 | -4.864 | -4.970 | -4.978 | -3.336 | -3.272 | -4.981 | -4.981 | -4.868 | -4.981 | 107976 | BRE       | NM_181279_5_+1  |
| Bre           | -4.816 | -4.686 | -4.006 | -4.053 | -2.398 | -4.964 | -4.948 | -4.965 | -1.861 | -4.960 | 107976 | BRE       | NM_181280_5_+1  |
| Bre           | -4.702 | -4.434 | -4.784 | -4.881 | -4.964 | -3.976 | -4.778 | -4.969 | -4.748 | -4.886 | 107976 | BRE       | NM_181281_5_+1  |
| Bre           | -4.500 | -4.100 | -4.778 | -3.374 | -4.941 | -4.967 | -4.853 | -4.968 | -4.662 | -4.867 | 107976 | BRE       | NM_181282_5_+1  |
| Car5b         | 0.410  | -0.200 | -1.818 | -1.462 | -2.188 | -2.477 | -0.791 | 1.006  | -0.212 | 1.489  | 56078  | CASB      | NM_181315_X_-1  |
| Bbs9          | 2.932  | 3.020  | 4.273  | 4.921  | 6.568  | 7.376  | 5.265  | 4.903  | 2.540  | 1.886  | 319845 | BBS9      | NM_181316_9_+1  |
| Rasgef1b      | 1.297  | -0.078 | 5.210  | 5.045  | 6.960  | 7.108  | 5.530  | 5.321  | 2.576  | 3.317  | 320292 | RASGEF1B  | NM_181318_5_-1  |
| Tmc6          | -0.485 | -0.444 | -0.154 | -0.447 | -0.781 | -0.522 | -0.278 | -0.715 | 2.625  | 1.659  | 217353 | TMC6      | NM_181321_11_-1 |
| Ctcf          | 7.127  | 7.159  | 6.312  | 6.348  | 6.893  | 6.851  | 6.678  | 6.560  | 6.096  | 6.163  | 13018  | CTCF      | NM_181322_8_+1  |
| Cwh43         | -4.981 | -4.981 | -3.475 | -4.088 | -4.981 | -4.981 | -4.939 | -4.910 | -4.981 | -4.981 | 231293 | CWH43     | NM_181323_5_+1  |
| Ddx6          | 4.717  | 4.560  | 5.011  | 4.924  | 5.381  | 5.394  | 4.776  | 4.543  | 4.134  | 4.318  | 13209  | DDX6      | NM_181324_9_+1  |
| Slc25a15      | 3.212  | 2.639  | 2.675  | 2.653  | 1.391  | 1.194  | 2.280  | 2.281  | 3.199  | 3.278  | 18408  | SLC25A15  | NM_181325_8_-1  |
| Slc25a29      | 3.114  | 3.383  | 2.279  | 2.596  | 2.526  | 2.660  | 1.829  | 1.218  | 0.255  | 0.233  | 214663 | SLC25A29  | NM_181328_12_-1 |
| C1rl          | -3.349 | -0.240 | -3.995 | -2.440 | -2.683 | -2.108 | -0.078 | 1.244  | 4.326  | 4.567  | 232371 | C1RL      | NM_181344_6_+1  |
| Npm2          | -4.981 | -4.981 | -3.777 | -2.903 | -4.683 | -4.980 | -3.528 | -3.916 | -4.190 | -4.227 | 328440 | NPM2      | NM_181345_14_-1 |
| Dennd1b       | -1.510 | -2.803 | -0.211 | -2.649 | -0.778 | -3.770 | -1.957 | -0.294 | -0.969 | 1.209  | 329260 | DENND1B   | NM_181347_1_+1  |
| Prune2        | -1.712 | -1.594 | -1.860 | -3.775 | -0.001 | -3.841 | -0.836 | -4.806 | 0.464  | -0.838 | 353211 | PRUNE2    | NM_181348_19_+1 |
| Mustn1        | -2.483 | -4.981 | -1.346 | -2.654 | -0.349 | -2.642 | -0.259 | -2.737 | 0.069  | -2.404 | 66175  | MUSTN1    | NM_181390_14_+1 |
| Chchd7        | 5.095  | 4.965  | 3.667  | 3.791  | 3.674  | 3.736  | 4.094  | 3.904  | 3.591  | 3.536  | 66433  | CHCHD7    | NM_181391_4_+1  |
| Gtf2h5        | 6.498  | 6.310  | 6.140  | 6.022  | 5.844  | 5.791  | 6.044  | 5.791  | 5.179  | 5.093  | 66467  | GTF2H5    | NM_181392_17_+1 |
| Anapc13       | 6.214  | 5.677  | 6.332  | 5.948  | 6.469  | 5.911  | 6.484  | 5.724  | 5.225  | 4.616  | 69010  | ANAPC13   | NM_181394_9_+1  |
| Pxdn          | -4.981 | -4.981 | -1.903 | -4.016 | -1.726 | -4.023 | -4.938 | -2.334 | -4.981 | -3.855 | 69675  | PXDN      | NM_181395_12_+1 |
| Rftn1         | 7.539  | 7.883  | 5.300  | 6.088  | 4.051  | 4.041  | 5.793  | 6.966  | 7.139  | 7.733  | 76438  | RFTN1     | NM_181397_17_-1 |
| Usp6nl        | -3.473 | -3.539 | 0.023  | -1.850 | -4.776 | -3.762 | 0.944  | -1.237 | -1.271 | 0.683  | 98910  | USP6NL    | NM_181399_2_+1  |
| Wdr47         | 2.179  | 2.745  | 2.177  | 1.884  | 2.786  | 3.166  | 2.651  | 2.732  | 3.362  | 3.432  | 99512  | WDR47     | NM_181400_3_+1  |
| Tmem64        | 3.946  | 4.362  | 5.388  | 5.493  | 5.802  | 6.030  | 5.256  | 4.764  | 3.367  | 3.700  | 100201 | TMEM64    | NM_181401_4_+1  |
| Parp11        | 3.675  | 3.600  | 3.846  | 4.191  | 3.719  | 4.197  | 3.591  | 3.957  | 3.974  | 4.488  | 101187 | PARP11    | NM_181402_6_+1  |
| Vps37c        | 4.097  | 4.059  | 5.878  | 5.847  | 4.876  | 4.845  | 4.895  | 5.173  | 5.667  | 5.381  | 107305 | VPS37C    | NM_181403_19_+1 |
| Rnpepl1       | 5.252  | 5.636  | 5.165  | 5.214  | 4.941  | 4.879  | 5.124  | 5.379  | 6.199  | 6.215  | 108657 | RNPEPL1   | NM_181405_1_+1  |
| Rars2         | 5.451  | 5.428  | 4.977  | 5.042  | 4.789  | 4.731  | 4.504  | 4.743  | 4.103  | 4.243  | 109093 | RARS2     | NM_181406_4_+1  |
| Me3           | -2.178 | -0.051 | -4.821 | -4.973 | -4.761 | -4.707 | -4.974 | -4.978 | -4.981 | -4.981 | 109264 | ME3       | NM_181407_7_+1  |
| Mtmr11        | 2.509  | 1.493  | 0.039  | -0.652 | 0.131  | -0.532 | -0.382 | -1.217 | -0.681 | 0.534  | 194126 | MTMR11    | NM_181409_3_+1  |
| Gtf2h3        | 4.941  | 5.074  | 4.650  | 4.840  | 4.568  | 4.591  | 4.144  | 4.407  | 3.466  | 3.755  | 209357 | GTF2H3    | NM_181410_5_+1  |
| Aftph         | 4.975  | 4.792  | 6.169  | 6.072  | 5.987  | 6.047  | 5.910  | 5.878  | 5.880  | 6.141  | 216549 | AFTPH     | NM_181411_11_-1 |
| Zbed4         | 3.666  | 3.597  | 3.344  | 3.096  | 3.521  | 3.151  | 3.654  | 3.489  | 3.907  | 4.161  | 223773 | NA        | NM_181412_15_+1 |
| Anks1         | 2.728  | 2.783  | 3.920  | 3.421  | 3.498  | 3.378  | 3.633  | 3.314  | 4.571  | 4.557  | 224650 | ANKS1A    | NM_181413_17_+1 |
| Pik3c3        | 4.745  | 4.963  | 4.868  | 5.017  | 4.764  | 4.886  | 4.795  | 5.120  | 5.357  | 5.416  | 225326 | PIK3C3    | NM_181414_18_+1 |
| Atrnl1        | 2.773  | 3.184  | 1.078  | 0.687  | 3.529  | 3.007  | 3.744  | 3.638  | 5.896  | 6.327  | 226255 | ATRNL1    | NM_181415_19_+1 |
| Arhgap11a     | 3.918  | 4.293  | 5.069  | 4.909  | 5.280  | 5.360  | 5.324  | 5.038  | 5.430  | 5.942  | 228482 | ARHGAP11A | NM_181416_2_-1  |
| Csrp2bp       | 3.864  | 3.988  | 3.960  | 3.903  | 4.363  | 4.123  | 3.932  | 4.363  | 4.816  | 4.751  | 228714 | KAT14     | NM_181417_2_+1  |
| Ushbp1        | -0.551 | -4.981 | -2.585 | -2.923 | -3.717 | -4.685 | -3.811 | -1.975 | -2.029 | -2.438 | 234395 | USHBP1    | NM_181418_8_-1  |
| Zfp599        | 3.689  | 2.649  | 2.246  | 2.286  | 2.584  | 2.211  | 0.870  | 1.049  | -2.177 | 0.111  | 235048 | NA        | NM_181419_9_-1  |
| Fn3krp        | 0.785  | 0.500  | -0.120 | 0.376  | -0.101 | 0.361  | -0.755 | -0.386 | -0.015 | -1.231 | 238024 | FN3KRP    | NM_181420_11_+1 |
| Gm15800       | 4.421  | 4.727  | 4.936  | 4.702  | 4.766  | 4.957  | 3.754  | 3.988  | 3.939  | 3.626  | 269700 | HECTD4    | NM_181421_5_+1  |
| Supv3l1       | 3.702  | 3.736  | 3.658  | 3.824  | 3.869  | 4.029  | 3.822  | 3.791  | 4.112  | 3.771  | 338359 | SUPV3L1   | NM_181423_10_-1 |
| Mtg2          | 4.095  | 4.470  | 3.634  | 3.909  | 3.761  | 3.994  | 3.487  | 3.939  | 2.666  | 3.076  | 52856  | MTG2      | NM_181424_2_+1  |
| Gprc5a        | -1.217 | -0.682 | -0.246 | -1.832 | -0.240 | -2.511 | 0.365  | -0.265 | 1.337  | 0.692  | 232431 | GPRC5A    | NM_181444_6_+1  |
| Fam89b        | 5.403  | 5.558  | 5.739  | 5.662  | 5.206  | 5.198  | 6.065  | 6.026  | 6.767  | 6.687  | 17826  | FAM89B    | NM_181452_19_-1 |
| Ltv1          | 5.549  | 5.525  | 5.498  | 5.545  | 5.379  | 5.496  | 5.641  | 5.691  | 5.937  | 5.444  | 353258 | LTV1      | NM_181470_10_-1 |

|                |        |        |        |        |        |        |        |        |        |        |               |           |                 |
|----------------|--------|--------|--------|--------|--------|--------|--------|--------|--------|--------|---------------|-----------|-----------------|
| Taz            | 6.045  | 6.032  | 5.389  | 5.781  | 5.625  | 6.182  | 5.536  | 5.790  | 5.549  | 5.171  | 66826         | TAZ       | NM_181516_X_+1  |
| Ipo7           | 2.241  | 2.058  | 4.688  | 4.321  | 4.806  | 4.298  | 5.241  | 4.705  | 5.055  | 6.117  | 233726        | IP07      | NM_181517_7_+1  |
| Syt15          | -0.744 | -0.769 | -1.641 | -3.642 | -2.398 | -2.879 | -1.062 | -3.301 | -2.377 | -2.308 | 319508        | SYT15     | NM_181529_14_+1 |
| Tm6sf2         | -4.981 | -2.473 | -3.277 | -4.199 | -2.909 | -3.953 | -3.799 | -4.220 | -4.981 | -4.981 | 107770        | TM6SF2    | NM_181540_8_+1  |
| Caprin1        | 0.272  | 1.064  | 0.918  | -0.381 | 1.270  | 0.783  | 0.030  | 0.246  | -0.077 | -1.079 | 232560        | CAPRIN2   | NM_181541_6_-1  |
| Pkd1l3         | -3.494 | -3.012 | -2.820 | -4.441 | -4.444 | -4.361 | -3.461 | -2.148 | -2.540 | -3.695 | 244646        | PKD1L3    | NM_181544_8_+1  |
| Slfm8          | 5.349  | 5.294  | 3.743  | 3.661  | 5.257  | 4.606  | 5.288  | 4.912  | 6.636  | 6.155  | 276950        | SLFN13    | NM_181545_11_-1 |
| Syt14          | -4.981 | -2.131 | -4.521 | -3.583 | -4.105 | -3.620 | -4.770 | -4.355 | -4.981 | -4.472 | 329324        | SYT14     | NM_181546_1_-1  |
| Nostrin        | 2.563  | 1.492  | 5.145  | 5.285  | 5.462  | 5.705  | 5.109  | 4.522  | 3.734  | 3.613  | 329416        | NOSTRIN   | NM_181547_2_+1  |
| Nprl3          | 5.239  | 5.012  | 3.930  | 4.033  | 4.316  | 4.600  | 3.953  | 4.025  | 3.742  | 3.631  | 17168         | NPRL3     | NM_181569_11_-1 |
| Ccdc85a        | -4.981 | -4.981 | -4.947 | -4.930 | -4.961 | -4.944 | -4.955 | -3.918 | -4.194 | -4.773 | 216613        | CCDC85A   | NM_181577_11_-1 |
| Eif5a          | 9.971  | 9.831  | 9.557  | 9.809  | 9.344  | 9.355  | 9.232  | 9.568  | 9.309  | 9.054  | 276770        | EIF5A     | NM_181582_11_-1 |
| Gab3           | 4.970  | 4.971  | 2.300  | 2.811  | 3.086  | 3.310  | 3.490  | 3.385  | 4.009  | 3.682  | 210710        | GAB3      | NM_181584_X_-1  |
| Pik3r3         | -0.354 | -0.186 | 0.807  | 1.549  | 1.758  | 2.295  | 0.329  | -1.474 | 0.293  | 0.421  | 18710         | PIK3R3    | NM_181585_4_+1  |
| Sirt6          | 2.499  | 2.650  | 2.136  | 2.118  | 2.334  | 2.091  | 1.515  | 1.636  | 2.124  | 2.052  | 50721         | SIRT6     | NM_181586_10_-1 |
| Cmb1           | 1.636  | 0.485  | 0.442  | 1.173  | 1.380  | 0.935  | 0.695  | 1.408  | -0.769 | -1.559 | 69574         | CMBL      | NM_181588_15_+1 |
| Ckap2l         | -0.082 | -1.243 | 3.298  | 3.812  | 3.870  | 3.568  | 3.611  | 3.091  | 2.341  | 2.026  | 70466         | CKAP2L    | NM_181589_2_-1  |
| Shq1           | 2.677  | 2.962  | 2.627  | 2.744  | 2.327  | 2.301  | 2.566  | 2.736  | 2.589  | 2.606  | 72171         | SHQ1      | NM_181590_6_-1  |
| Nme8           | -4.981 | -4.981 | -4.952 | -4.952 | -4.946 | -4.946 | -4.941 | -4.915 | -4.981 | -4.981 | 73412         | NME8      | NM_181591_13_-1 |
| Itpkc          | 2.314  | 1.868  | 2.594  | 2.113  | 2.666  | 1.982  | 2.513  | 2.119  | 2.730  | 3.084  | 233011        | ITPKC     | NM_181593_7_-1  |
| Edc4           | 3.226  | 1.915  | 2.689  | 2.462  | 2.847  | 2.783  | 3.027  | 1.889  | 3.489  | 3.449  | 234699        | EDC4      | NM_181594_8_+1  |
| Ppp1r9a        | -1.853 | -3.315 | -3.167 | -0.991 | 1.843  | 3.209  | -0.727 | 0.883  | -1.460 | 1.893  | 243725        | PPP1R9A   | NM_181595_6_+1  |
| Retnlg         | -3.349 | -0.610 | -2.475 | 0.629  | -1.648 | 3.109  | 1.096  | 4.377  | 3.056  | -0.543 | 245195        | NA        | NM_181596_16_+1 |
| Gpatch11       | 5.588  | 6.004  | 4.833  | 5.095  | 4.848  | 5.061  | 4.891  | 4.850  | 4.298  | 4.632  | 53951         | GPATCH11  | NM_181649_17_+1 |
| Prdm4          | 1.666  | 1.293  | 2.330  | 2.159  | 2.381  | 2.450  | 2.024  | 1.901  | 3.177  | 2.793  | 72843         | PRDM4     | NM_181650_10_-1 |
| Plppr3         | 1.558  | 0.473  | -4.513 | -4.861 | -2.560 | -3.903 | -4.296 | -3.325 | 2.278  | 2.306  | 216152        | PLPPR3    | NM_181681_10_-1 |
| Dsg1b          | -4.981 | -4.981 | -4.976 | -4.882 | -4.953 | -2.779 | -4.943 | -4.917 | -4.981 | -4.981 | 225256        | DSG1      | NM_181682_18_+1 |
| Art3           | -4.981 | -4.981 | 0.399  | -0.499 | 0.180  | 0.982  | -0.397 | -0.767 | -4.981 | -3.233 | 109979        | ART3      | NM_181728_5_+1  |
| Record_removed | -2.268 | -4.981 | -3.126 | -3.921 | -3.415 | -4.362 | -4.653 | -4.415 | -3.750 | -2.708 | Record_remove | NA        | NM_181729_7_-1  |
| Polr1d         | 6.177  | 5.777  | 6.186  | 5.769  | 5.344  | 4.987  | 5.694  | 5.320  | 5.535  | 5.146  | 20018         | POLR1D    | NM_181730_5_+1  |
| Cabyr          | -1.984 | -1.459 | -3.230 | -4.961 | -4.327 | -4.962 | -2.926 | -4.419 | -1.973 | -2.426 | 71132         | CABYR     | NM_181731_18_+1 |
| Aida           | 4.091  | 3.883  | 3.944  | 3.997  | 3.505  | 3.021  | 3.462  | 3.679  | 4.420  | 4.588  | 108909        | AIDA      | NM_181732_1_+1  |
| Ttpal          | 3.389  | 3.451  | 2.020  | 2.982  | 2.672  | 3.479  | 2.185  | 2.968  | 4.106  | 4.490  | 76080         | TTPAL     | NM_181734_2_+1  |
| Ffar4          | 2.152  | 2.646  | 5.859  | 5.895  | 4.524  | 4.366  | 4.751  | 3.838  | 0.865  | 0.992  | 107221        | FFAR4     | NM_181748_19_+1 |
| R3hdm1         | 5.420  | 5.529  | 5.324  | 5.381  | 5.516  | 5.960  | 5.235  | 4.996  | 4.656  | 4.839  | 226412        | R3HDM1    | NM_181750_1_+1  |
| Gpr135         | -4.981 | -1.029 | -1.842 | -1.876 | -4.501 | -4.259 | -4.900 | -4.499 | -2.792 | -4.227 | 238252        | GPR135    | NM_181752_12_-1 |
| Opn5           | -4.981 | -4.981 | -4.981 | -4.981 | -4.719 | -4.708 | -4.981 | -4.981 | -4.981 | -4.981 | 353344        | OPN5      | NM_181753_17_-1 |
| Gpr141         | 1.874  | 0.052  | 5.313  | 4.695  | 6.712  | 7.064  | 7.189  | 7.226  | 8.727  | 9.021  | 353346        | GPR141    | NM_181754_13_-1 |
| Gstp2          | 1.371  | 0.264  | 0.910  | -1.095 | 0.609  | -0.285 | 0.859  | 0.818  | 1.595  | 1.124  | 14869         | GSTP1     | NM_181796_19_-1 |
| Cep128         | 5.026  | 6.093  | 4.083  | 4.242  | 3.928  | 3.709  | 3.520  | 3.904  | 3.868  | 3.722  | 75216         | CEP128    | NM_181815_12_-1 |
| Tmc4           | 0.892  | 1.169  | 1.685  | 1.485  | 1.776  | 1.330  | 1.354  | 0.377  | 0.714  | 0.161  | 353499        | TMC4      | NM_181820_7_-1  |
| Hcfc1r1        | 6.065  | 5.839  | 5.273  | 5.057  | 5.453  | 5.175  | 5.787  | 5.116  | 5.094  | 4.602  | 353502        | HCFC1R1   | NM_181821_17_+1 |
| Optn           | 1.799  | 1.481  | 2.018  | 2.597  | 1.482  | 2.059  | 0.907  | 1.697  | 0.899  | 0.759  | 71648         | OPTN      | NM_181848_2_-1  |
| Trim66         | -2.939 | -3.172 | -4.844 | -3.387 | -5.001 | -4.872 | -4.977 | -4.258 | -1.820 | -4.981 | 330627        | TRIM66    | NM_181853_7_-1  |
| Champ1         | 3.046  | 3.110  | 4.204  | 4.111  | 3.932  | 3.775  | 3.895  | 3.975  | 4.180  | 4.253  | 101994        | CHAMP1    | NM_181854_8_+1  |
| Tmc8           | 1.644  | 3.563  | -0.044 | 2.403  | 1.333  | 3.117  | 1.553  | 3.161  | 3.667  | 2.970  | 217356        | TMC8      | NM_181856_11_+1 |
| Poln           | -3.861 | -4.981 | -4.513 | -4.676 | -4.475 | -4.833 | -4.071 | -4.740 | -3.722 | -4.751 | 272158        | NA        | NM_181857_5_-1  |
| Cd59b          | -1.937 | 0.060  | -3.900 | -3.199 | -4.787 | -3.336 | -4.973 | -2.163 | -4.981 | -4.981 | 333883        | CD59      | NM_181858_2_+1  |
| Mkl2           | -0.799 | -0.745 | -0.097 | 0.229  | 0.085  | 0.091  | -1.728 | -1.250 | -4.956 | -1.839 | 239719        | MKL2      | NM_181860_16_+1 |
| Rerg           | -4.981 | -4.981 | -4.959 | -4.959 | -4.976 | -4.862 | -4.981 | -4.981 | -4.981 | -4.981 | 232441        | RERG      | NM_181988_6_-1  |
| Hnrrnpa2b1     | 6.808  | 6.214  | 5.852  | 5.058  | 4.726  | 3.391  | 5.120  | 3.336  | 5.178  | 3.897  | 53379         | HNRNPA2B1 | NM_182650_6_-1  |
| Ggn            | -4.981 | -4.981 | -1.583 | -2.367 | -0.201 | -0.398 | -1.208 | -2.912 | -0.690 | -0.692 | 243897        | GGN       | NM_182694_7_+1  |
| Ggn            | -4.981 | -4.981 | -4.286 | -4.612 | -4.156 | -4.687 | -4.588 | -4.975 | -4.981 | -3.232 | 243897        | GGN       | NM_182696_7_+1  |
| Myo15          | -4.981 | -4.981 | -0.461 | -2.797 | 0.769  | 0.384  | 0.768  | -0.300 | -0.297 | -2.750 | 17910         | MYO15A    | NM_182698_11_+1 |
| Nfasc          | -4.981 | -4.378 | -4.962 | -4.601 | -3.880 | -3.979 | -4.139 | -4.439 | -4.879 | -1.681 | 269116        | NFASC     | NM_182716_1_-1  |
| Klhl25         | 1.190  | 2.540  | 0.737  | 0.975  | 0.882  | 1.279  | 0.119  | 0.970  | 0.553  | 1.657  | 207952        | KLHL25    | NM_182782_7_+1  |
| Fam167b        | -4.981 | -4.981 | -4.898 | -4.252 | -3.624 | -3.600 | -3.338 | -1.348 | -3.531 | -4.981 | 230766        | FAM167B   | NM_182783_4_-1  |
| Gpt            | 2.240  | 2.164  | 1.405  | 1.107  | 0.734  | 0.947  | 0.599  | 0.135  | 0.308  | 0.272  | 76282         | GPT       | NM_182805_15_+1 |
| Gpr18          | 7.836  | 7.285  | 5.872  | 5.852  | 7.281  | 7.393  | 7.148  | 7.053  | 6.035  | 5.887  | 110168        | GPR18     | NM_182806_14_-1 |
| Fam19a2        | -4.981 | -4.981 | -4.971 | -4.971 | -4.972 | -4.972 | -4.909 | -4.680 | -4.981 | -4.981 | 268354        | FAM19A2   | NM_182807_10_+1 |
| Ntrk3          | -4.981 | -4.981 | -4.981 | -4.981 | -4.926 | -4.037 | -3.850 | -2.217 | -4.981 | -4.981 | 18213         | NTRK3     | NM_182809_7_-1  |
| Tppp           | 1.758  | 2.346  | -1.844 | -1.306 | -2.082 | -1.211 | -1.274 | -0.800 | 0.707  | -0.064 | 72948         | TPPP      | NM_182839_13_+1 |
| Tmem150c       | -4.981 | -4.981 | 1.687  | 1.743  | 3.600  | 3.748  | 1.290  | -0.258 | -4.981 | -4.981 | 231503        | TMEM150C  | NM_182841_5_-1  |
| Spred3         | -2.842 | -4.981 | -0.473 | -0.546 | 1.363  | 1.018  | 0.393  | -0.739 | -1.244 | -0.747 | 101809        | SPRED3    | NM_182927_7_-1  |
| Adm2           | -4.981 | -4.981 | -3.872 | -2.672 | -2.557 | -2.457 | -4.585 | -4.697 | -4.981 | -4.981 | 223780        | ADM2      | NM_182928_15_+1 |
| Rims3          | -3.563 | -2.137 | -3.000 | -3.599 | -1.266 | -3.396 | -1.940 | -1.052 | -1.383 | 0.040  | 242662        | RIMS3     | NM_182929_4_+1  |
| Plekha6        | -4.356 | -3.655 | -4.389 | -4.854 | -4.866 | -4.957 | -4.920 | -3.243 | -0.963 | -4.680 | 240753        | NA        | NM_182930_1_+1  |
| Ppp4r2         | 5.330  | 5.182  | 5.456  | 5.402  | 5.300  | 5.374  | 5.353  | 4.887  | 4.959  | 5.180  | 232314        | PPP4R2    | NM_182939_6_+1  |
| Slc17a8        | -4.981 | -4.981 | -0.120 | -4.921 | -3.222 | -4.370 | -3.741 | -4.985 | -4.981 | -4.981 | 216227        | SLC17A8   | NM_182959_10_-1 |
| Ssrp1          | 4.742  | 4.653  | 5.260  | 5.141  | 4.665  | 4.886  | 5.010  | 4.983  | 5.112  | 4.946  | 20833         | SSRP1     | NM_182990_2_+1  |
| Slc17a7        | -4.981 | -4.981 | -4.850 | -2.635 | -4.721 | -4.977 | -4.952 | -2.755 | -4.981 | -2.713 | 72961         | SLC17A7   | NM_182993_7_+1  |
| Arl5a          | 5.775  | 5.557  | 6.857  | 6.117  | 6.461  | 5.981  | 6.842  | 6.401  | 6.604  | 7.146  | 75423         | ARL5A     | NM_182994_2_-1  |
| Ccp110         | 1.987  | 2.447  | 1.832  | 2.062  | 2.671  | 2.696  | 2.103  | 2.099  | 1.510  | 2.154  | 101565        | CCP110    | NM_182995_7_+1  |
| Zfp692         | 2.680  | 2.695  | 2.854  | 2.811  | 3.287  | 3.120  | 3.183  | 3.560  | 3.654  | 3.500  | 103836        | ZNF692    | NM_182996_11_+1 |

|               |        |        |        |        |        |        |        |        |        |        |        |          |                 |
|---------------|--------|--------|--------|--------|--------|--------|--------|--------|--------|--------|--------|----------|-----------------|
| Prkab2        | 2.702  | 2.371  | 4.728  | 4.112  | 2.730  | 1.929  | 3.748  | 3.862  | 5.269  | 5.235  | 108097 | PRKAB2   | NM_182997_3_+1  |
| Rnf20         | 4.332  | 5.041  | 4.925  | 4.890  | 4.805  | 5.053  | 4.779  | 4.704  | 4.204  | 4.471  | 109331 | RNF20    | NM_182999_4_+1  |
| Asic3         | -4.981 | -4.981 | -4.966 | -4.969 | -4.949 | -4.642 | -4.979 | -4.981 | -4.951 | -4.981 | 171209 | ASIC3    | NM_183000_5_+1  |
| Zfp184        | -1.511 | -0.518 | 0.325  | -0.260 | 0.529  | 0.177  | -0.601 | -1.994 | -4.981 | -1.891 | 193452 | ZNF184   | NM_183014_13_+1 |
| Cdc42bpb      | 1.797  | 1.801  | 3.058  | 3.057  | 2.303  | 2.558  | 2.111  | 2.245  | 3.544  | 3.649  | 217866 | CDC42BPB | NM_183016_12_-1 |
| Ttll12        | 4.043  | 3.822  | 2.965  | 3.556  | 2.549  | 2.925  | 2.396  | 3.593  | 1.726  | 2.656  | 223723 | TTL12    | NM_183017_15_-1 |
| Arhgef4       | 2.591  | 2.978  | 2.147  | 2.007  | 2.282  | 2.276  | 1.741  | 1.177  | 2.378  | 2.150  | 226970 | ARHGEF4  | NM_183019_1_+1  |
| Atxn2l        | 4.635  | 4.891  | 5.680  | 5.538  | 5.793  | 5.813  | 5.291  | 5.507  | 5.807  | 5.822  | 233871 | ATXN2L   | NM_183020_7_-1  |
| Thada         | 3.098  | 2.934  | 3.282  | 3.098  | 4.172  | 4.001  | 3.492  | 3.468  | 3.078  | 3.159  | 240174 | THADA    | NM_183021_17_-1 |
| Raver2        | -1.550 | 0.454  | -0.644 | -1.332 | -1.266 | -2.157 | -1.353 | -0.415 | -0.263 | -0.840 | 242570 | RAVER2   | NM_183024_4_+1  |
| A430033K04Rik | 2.566  | 2.007  | 1.557  | 1.259  | 2.548  | 2.246  | 2.024  | 0.792  | 1.498  | 1.139  | 243308 | NA       | NM_183025_5_+1  |
| Ap1s3         | 1.801  | 1.267  | 3.652  | 3.792  | 2.637  | 3.180  | 2.367  | 2.102  | -0.180 | -0.948 | 252903 | AP1S3    | NM_183027_1_-1  |
| Pcmttd1       | 5.668  | 5.775  | 5.158  | 5.199  | 5.007  | 5.178  | 5.039  | 5.211  | 4.660  | 5.408  | 319263 | PCMTD1   | NM_183028_1_+1  |
| Igf2bp2       | -0.707 | -2.437 | -4.253 | -2.874 | -4.668 | -4.410 | -3.343 | -4.347 | -1.737 | -2.384 | 319765 | IGF2BP2  | NM_183029_16_-1 |
| Gpr183        | 8.552  | 8.868  | 5.917  | 6.031  | 8.809  | 9.130  | 7.823  | 7.677  | 6.158  | 6.435  | 321019 | GPR183   | NM_183031_14_-1 |
| Zfp516        | 0.966  | 1.493  | 4.887  | 4.378  | 4.597  | 4.524  | 4.386  | 3.676  | 4.784  | 4.580  | 329003 | ZNF516   | NM_183033_18_+1 |
| Plekhn1       | 3.476  | 3.495  | 4.408  | 4.315  | 4.322  | 4.269  | 4.419  | 4.546  | 5.884  | 5.613  | 353047 | PLEKHM1  | NM_183034_11_-1 |
| Trim46        | -4.733 | -4.730 | -4.924 | -4.909 | -4.944 | -4.956 | -4.941 | -4.974 | -4.792 | -2.091 | 360213 | TRIM46   | NM_183037_3_-1  |
| Defb40        | -4.981 | -4.981 | -4.981 | -4.981 | -4.981 | -4.981 | -1.645 | -4.088 | -4.981 | -4.981 | 360217 | NA       | NM_183039_8_-1  |
| Kif20b        | 1.291  | 1.677  | 3.329  | 3.314  | 3.933  | 3.498  | 3.531  | 2.724  | 0.856  | 1.129  | 240641 | KIF20B   | NM_183046_19_+1 |
| Mrps10        | -0.839 | -0.907 | 0.556  | -1.037 | 0.020  | -0.047 | -0.149 | -0.174 | -0.211 | -0.376 | 64657  | MRPS10   | NM_183086_17_+1 |
| Fam189a1      | -4.981 | -1.656 | -2.722 | -3.687 | -3.609 | -4.247 | -4.162 | -4.926 | -4.981 | -4.981 | 70638  | FAM189A1 | NM_183087_7_-1  |
| Zbed5         | -0.018 | 0.526  | -0.071 | 0.071  | -0.713 | -0.583 | -0.358 | -0.050 | -0.946 | -0.843 | 71970  | ZBED5    | NM_183088_5_+1  |
| Dssc1         | 0.561  | -0.975 | 2.216  | 2.255  | 2.711  | 2.252  | 2.461  | 2.078  | 0.096  | -0.799 | 72107  | DSSC1    | NM_183089_15_-1 |
| Tonsl         | -0.427 | 1.517  | 1.515  | 1.626  | 2.816  | 2.229  | 1.730  | 2.082  | 1.065  | 1.419  | 72749  | TONSL    | NM_183091_15_-1 |
| Xlr4c         | 3.440  | 3.711  | 2.244  | 3.208  | 3.365  | 4.131  | 2.539  | 3.347  | 1.237  | 2.473  | 72891  | NA       | NM_183094_X_-1  |
| 1700067K01Rik | -3.028 | -3.408 | -4.232 | -4.977 | -4.199 | -4.486 | -3.818 | -4.978 | -2.905 | -3.233 | 73453  | C19orf67 | NM_183097_8_+1  |
| Ttc17         | 4.025  | 3.781  | 4.285  | 4.095  | 4.779  | 4.716  | 4.512  | 4.494  | 5.294  | 5.303  | 74569  | TTC17    | NM_183106_2_-1  |
| 170002915Rik  | -3.843 | -3.315 | -3.643 | -3.948 | -1.323 | -2.220 | -2.573 | -3.020 | -3.823 | -3.209 | 75641  | C11orf94 | NM_183112_2_+1  |
| Ccdc125       | -0.462 | -0.516 | -0.767 | -1.549 | 1.484  | 1.174  | 2.989  | 3.304  | 6.018  | 5.850  | 76041  | CCDC125  | NM_183115_13_+1 |
| Slc18b1       | 1.640  | 1.578  | -2.316 | -1.756 | -3.284 | -0.088 | -2.599 | -1.950 | -1.636 | -4.054 | 76306  | SLC18B1  | NM_183116_10_+1 |
| Zfp972        | 0.611  | -1.736 | 0.765  | -1.108 | 0.498  | -1.103 | 0.087  | -1.184 | -0.754 | -2.566 | 78703  | NA       | NM_183135_2_-1  |
| Tepsin        | 3.309  | 3.441  | 3.855  | 3.525  | 3.788  | 4.037  | 3.654  | 3.957  | 4.137  | 4.265  | 78777  | TEPSIN   | NM_183137_11_-1 |
| Tet3          | 4.932  | 4.963  | 5.488  | 5.378  | 5.389  | 5.295  | 5.274  | 5.286  | 5.519  | 5.554  | 194388 | TET3     | NM_183138_6_-1  |
| Pld6          | -4.946 | -4.836 | -2.846 | -2.948 | -4.980 | -4.395 | -4.854 | -4.927 | -4.981 | -4.967 | 194908 | NA       | NM_183139_11_-1 |
| Zfp691        | 1.103  | 4.140  | -4.952 | -0.322 | -2.569 | -1.081 | -3.976 | 0.476  | -1.836 | 0.594  | 195522 | ZNF691   | NM_183140_4_-1  |
| Alg11         | -3.882 | -1.042 | -3.611 | -0.781 | -1.270 | -4.955 | -0.797 | -3.566 | 1.364  | 0.348  | 207958 | ALG11    | NM_183142_8_+1  |
| Inpp5a        | -3.197 | 0.252  | -2.197 | -1.252 | -1.221 | -1.389 | 0.874  | -2.545 | 0.164  | -1.430 | 212111 | INPP5A   | NM_183144_7_+1  |
| Zfp729a       | 3.087  | 4.827  | 3.294  | 4.109  | 3.373  | 4.969  | 3.432  | 4.378  | 2.943  | 4.720  | 212281 | ZNF729   | NM_183146_13_-1 |
| Iffo2         | -0.130 | 1.737  | -1.416 | -0.369 | -2.077 | 0.130  | -1.177 | -1.535 | -4.403 | 0.727  | 212632 | IFFO2    | NM_183148_4_+1  |
| Zfp598        | 3.180  | 3.076  | 3.204  | 3.238  | 3.679  | 3.443  | 3.689  | 3.285  | 3.552  | 3.526  | 213753 | ZNF598   | NM_183149_17_+1 |
| BC003965      | 5.886  | 5.865  | 5.209  | 5.176  | 5.452  | 5.600  | 5.377  | 5.335  | 4.567  | 4.533  | 214489 | C16orf91 | NM_183150_17_+1 |
| Zfyve1        | 2.554  | 2.569  | 3.136  | 3.078  | 2.603  | 2.775  | 2.668  | 2.772  | 3.444  | 3.793  | 217695 | ZFYVE1   | NM_183154_12_-1 |
| Nrde2         | 1.727  | 2.168  | 2.286  | 2.484  | 2.353  | 2.277  | 2.399  | 2.315  | 2.985  | 2.511  | 217827 | NRDE2    | NM_183155_12_-1 |
| Cyp2ab1       | -3.843 | -4.981 | -4.729 | -3.784 | -4.982 | -3.934 | 2.863  | 2.906  | 4.766  | 4.722  | 224044 | NA       | NM_183158_16_-1 |
| Slc17a9       | 1.818  | 1.322  | 1.990  | 2.299  | 1.633  | 1.864  | 1.684  | 2.228  | 1.917  | 1.186  | 228993 | SLC17A9  | NM_183161_2_+1  |
| Helz2         | 4.526  | 4.539  | 4.022  | 3.616  | 5.286  | 4.667  | 4.614  | 4.199  | 4.832  | 4.101  | 229003 | HELZ2    | NM_183162_2_-1  |
| Rhbdl2        | -4.981 | -4.981 | -4.977 | -3.718 | -3.162 | -1.896 | -3.794 | -4.029 | -4.981 | -4.981 | 230726 | RHBDL2   | NM_183163_4_+1  |
| Pyroxd1       | 4.219  | 4.243  | 3.360  | 2.963  | 3.885  | 2.972  | 3.881  | 3.032  | 3.833  | 3.258  | 232491 | PYROXD1  | NM_183165_6_+1  |
| Al987944      | 3.811  | 3.924  | 2.904  | 2.030  | 1.931  | 1.347  | 2.907  | 3.076  | 3.231  | 3.622  | 233168 | NA       | NM_183167_7_-1  |
| P2ry6         | 4.297  | 4.625  | 5.870  | 6.125  | 4.180  | 4.242  | 5.589  | 6.115  | 6.483  | 7.048  | 233571 | P2RY6    | NM_183168_7_-1  |
| Mpv17l2       | 6.144  | 5.894  | 5.076  | 4.938  | 5.099  | 5.134  | 5.183  | 5.130  | 5.400  | 4.832  | 234384 | MPV17L2  | NM_183170_8_-1  |
| Ric8b         | 2.319  | 1.984  | -0.202 | 0.126  | 2.485  | 1.990  | 0.377  | 2.385  | 2.210  | 1.630  | 237422 | RIC8B    | NM_183172_10_+1 |
| Sowaha        | -2.273 | -2.883 | -3.933 | -1.081 | -4.467 | -1.483 | -4.200 | -3.156 | -4.981 | -4.227 | 237761 | SOWAHA   | NM_183173_11_-1 |
| Homez         | 1.547  | 2.060  | 0.938  | 0.845  | 1.005  | 1.110  | -0.457 | 1.026  | 1.439  | 1.859  | 239099 | HOMEZ    | NM_183174_14_-1 |
| C1qtnf9       | -4.981 | -4.981 | -4.981 | -4.981 | -4.104 | -4.945 | -3.473 | -4.897 | -4.981 | -4.227 | 239126 | C1QTNF9B | NM_183175_14_+1 |
| Zfp811        | -4.981 | -0.291 | -3.769 | -2.270 | -2.983 | -1.490 | -2.720 | -1.161 | -2.781 | -1.146 | 240063 | NA       | NM_183177_17_-1 |
| Tspan18       | -4.981 | -4.981 | -4.985 | -4.523 | -4.877 | -4.758 | -4.330 | -4.304 | -4.981 | -1.443 | 241556 | TSPAN18  | NM_183180_2_-1  |
| Abhd16b       | -4.981 | -4.981 | -0.965 | -0.278 | -0.156 | -0.399 | -2.215 | -2.028 | -4.981 | -4.981 | 241850 | ABHD16B  | NM_183181_2_+1  |
| Gprin3        | 0.045  | -0.769 | -2.299 | -1.681 | -4.040 | -3.645 | -2.466 | -0.704 | 2.135  | 1.122  | 243385 | GPRIN3   | NM_183183_6_-1  |
| Zfp300        | -0.133 | -1.181 | -1.852 | -2.094 | -0.744 | -1.208 | -2.013 | -2.858 | -4.981 | -2.867 | 245368 | ZNF567   | NM_183185_X_-1  |
| Foxn3         | 5.452  | 5.374  | 4.998  | 4.530  | 6.417  | 5.333  | 6.400  | 5.610  | 6.490  | 5.931  | 71375  | NA       | NM_183186_12_-1 |
| Marveld1      | 2.060  | 2.589  | 5.333  | 5.094  | 7.954  | 8.056  | 7.304  | 6.753  | 3.902  | 4.043  | 277010 | MARVELD1 | NM_183195_19_+1 |
| Usp44         | -4.981 | -4.981 | -4.959 | -4.436 | -4.720 | -4.872 | -4.981 | -4.981 | -4.981 | -4.981 | 327799 | USP44    | NM_183199_10_+1 |
| Slfn5         | 4.834  | 4.380  | 6.553  | 5.514  | 6.134  | 5.048  | 6.736  | 6.253  | 8.116  | 7.298  | 327978 | SLFN5    | NM_183201_11_+1 |
| Zmiz1         | 5.134  | 5.333  | 6.544  | 6.532  | 6.992  | 6.814  | 7.191  | 7.103  | 7.100  | 7.344  | 328365 | ZMIZ1    | NM_183208_14_+1 |
| Gprin2        | -4.981 | -4.981 | -4.490 | -4.601 | -4.559 | -4.601 | -4.974 | -4.978 | -4.981 | -4.981 | 432839 | GPRIN2   | NM_183209_14_-1 |
| Scd4          | -0.606 | -1.291 | 2.745  | -2.250 | -1.530 | -2.696 | -1.719 | -2.163 | -1.080 | -1.231 | 329065 | NA       | NM_183216_19_+1 |
| Accs          | 0.818  | -2.169 | 2.600  | 2.780  | -1.598 | 0.281  | 2.074  | 1.404  | 2.458  | 2.261  | 329470 | ACCS     | NM_183220_2_-1  |
| Fat4          | -4.981 | -4.981 | -4.951 | -4.951 | -4.881 | -4.812 | -4.939 | -4.337 | -4.981 | -4.981 | 329628 | FAT4     | NM_183221_3_+1  |
| Fcrl5         | -0.775 | -2.853 | -4.182 | -4.102 | -1.042 | -3.651 | 1.048  | -4.501 | -4.981 | -4.963 | 329693 | FCRL5    | NM_183222_3_+1  |
| Fam19a3       | -4.981 | -4.981 | -4.731 | -3.543 | -4.956 | -4.771 | -4.118 | -3.764 | -4.981 | -4.981 | 329731 | FAM19A3  | NM_183224_3_-1  |
| Usp24         | 5.000  | 4.941  | 4.762  | 4.662  | 4.493  | 4.756  | 4.606  | 4.538  | 4.218  | 4.536  | 329908 | USP24    | NM_183225_4_+1  |
| Wfdc21        | 1.412  | -2.087 | -2.891 | -1.588 | 0.319  | 1.723  | -0.419 | 2.835  | 4.843  | -0.094 | 66107  | NA       | NM_183249_11_+1 |

|                |        |        |        |        |        |        |        |        |        |        |               |            |                      |
|----------------|--------|--------|--------|--------|--------|--------|--------|--------|--------|--------|---------------|------------|----------------------|
| Tma7           | 8.204  | 8.077  | 8.118  | 8.183  | 8.174  | 8.306  | 8.345  | 8.073  | 7.069  | 6.901  | 66167         | TMA7       | NM_183250_9_-1       |
| Aamdc          | 4.209  | 3.401  | 2.583  | 1.832  | 2.566  | 1.770  | 2.250  | 1.754  | 1.245  | 1.668  | 66273         | AAMDC      | NM_183251_7_-1       |
| Fam229b        | 1.490  | 1.765  | 1.012  | 1.284  | 0.833  | 1.684  | -0.004 | -0.051 | -0.635 | -1.525 | 66337         | FAM229B    | NM_183254_10_-1      |
| Cox14          | 7.880  | 7.706  | 7.003  | 6.827  | 6.622  | 6.480  | 7.237  | 6.896  | 6.284  | 5.958  | 66379         | COX14      | NM_183256_15_+1      |
| Smim5          | 9.700  | 9.474  | -0.051 | 0.730  | 2.387  | 2.339  | 3.479  | 3.720  | 5.120  | 5.202  | 66528         | SMIM5      | NM_183259_11_+1      |
| Nr2f2          | -2.678 | -3.108 | -3.514 | -4.525 | -4.772 | -4.947 | -4.748 | -3.362 | -4.981 | -4.981 | 11819         | NR2F2      | NM_183261_7_-1       |
| Stk35          | 1.625  | 2.160  | 2.416  | 3.668  | 2.854  | 3.788  | 2.280  | 3.170  | 3.580  | 4.551  | 67333         | STK35      | NM_183262_2_+1       |
| Rnmtl1         | 3.181  | 3.232  | 2.549  | 2.928  | 2.302  | 2.932  | 2.357  | 2.974  | 1.833  | 2.293  | 67390         | MRM3       | NM_183263_11_+1      |
| Tespa1         | 5.241  | 5.366  | 2.023  | 2.156  | 4.693  | 4.861  | 3.129  | 2.610  | -1.026 | -0.842 | 67596         | TESPA1     | NM_183264_10_+1      |
| Coa4           | 4.907  | 4.455  | 4.113  | 4.078  | 3.695  | 3.620  | 4.167  | 3.931  | 3.790  | 3.693  | 68185         | COA4       | NM_183270_7_+1       |
| Wfdc15a        | -4.981 | -4.981 | -2.177 | -2.806 | -4.979 | -4.955 | -4.944 | -4.919 | -4.981 | -4.981 | 68221         | NA         | NM_183271_2_-1       |
| Tefm           | 4.178  | 4.314  | 4.585  | 4.484  | 4.155  | 3.793  | 3.997  | 3.767  | 3.160  | 3.065  | 68550         | TEFM       | NM_183275_11_-1      |
| Nbeal2         | 3.049  | 3.143  | 4.843  | 4.813  | 3.772  | 3.440  | 4.544  | 4.282  | 6.041  | 5.906  | 235627        | NBEAL2     | NM_183276_9_-1       |
| Smco1          | -2.990 | -2.110 | -2.321 | -2.896 | -3.141 | -3.118 | -3.539 | -3.387 | -2.006 | -2.347 | 69576         | SMCO1      | NM_183283_16_+1      |
| Spink2         | -4.981 | -4.843 | -4.922 | -4.917 | -4.949 | -3.314 | -3.444 | -0.116 | 1.738  | 4.312  | 69982         | NA         | NM_183284_5_-1       |
| Kctd2          | 4.746  | 4.991  | 4.885  | 4.905  | 4.861  | 4.608  | 4.446  | 4.580  | 4.977  | 4.732  | 70382         | KCTD2      | NM_183285_11_+1      |
| Dhrs13         | 2.495  | 2.433  | 2.917  | 3.011  | 2.510  | 2.761  | 2.041  | 2.099  | 0.051  | -0.074 | 70451         | DHRS13     | NM_183286_11_+1      |
| 2610318N02Rik  | -0.317 | -1.546 | 2.569  | 3.039  | 1.811  | 1.397  | 1.223  | 1.729  | -1.871 | -2.386 | 70458         | NA         | NM_183287_16_-1      |
| Arhgap27       | 4.240  | 3.581  | 0.844  | 0.758  | 0.404  | -0.540 | 1.090  | 0.156  | 0.431  | 0.268  | 544817        | ARHGAP27   | NM_183288_11_-1      |
| Tcerg1l        | -3.189 | -4.981 | -4.981 | -4.981 | -4.981 | -4.981 | -4.978 | -3.479 | -4.981 | -0.007 | 70571         | TCERG1L    | NM_183289_7_-1       |
| 4921517D22Rik  | -4.981 | -4.981 | -3.405 | -3.869 | -3.558 | -4.288 | -4.502 | -4.160 | -4.981 | -3.138 | 70900         | NA         | NM_183290_13_-1      |
| Cdkl1          | -4.981 | -2.132 | -2.048 | -1.930 | -4.887 | -3.357 | -4.914 | -4.574 | -4.981 | -4.981 | 71091         | CDKL1      | NM_183294_12_-1      |
| Zfyve9         | -4.981 | -4.981 | 0.211  | -0.696 | -2.051 | -0.529 | 0.875  | 1.705  | 3.419  | 3.902  | 230597        | ZFYVE9     | NM_183300_4_-1       |
| Taok3          | 6.113  | 6.198  | 7.033  | 7.075  | 7.118  | 7.120  | 7.035  | 6.910  | 7.156  | 7.133  | 330177        | TAOK3      | NM_183306_5_+1       |
| Ccdc63         | -4.833 | -4.762 | -4.916 | -4.975 | -4.967 | -4.973 | -4.981 | -4.981 | -4.968 | -4.981 | 330188        | CCDC63     | NM_183307_5_-1       |
| Pon2           | 6.179  | 6.474  | 5.807  | 5.846  | 6.183  | 5.943  | 6.298  | 6.439  | 7.090  | 7.163  | 330260        | PON2       | NM_183308_6_-1       |
| Gm5111         | -4.981 | -4.981 | -5.036 | -4.575 | -4.299 | -1.657 | -4.377 | -3.624 | -4.981 | -4.981 | 330305        | NA         | NM_183309_6_+1       |
| Cscer1         | -3.959 | -2.908 | 4.231  | 4.315  | 2.889  | 2.749  | 0.636  | 0.205  | -4.981 | -4.498 | 232035        | CCSER1     | NM_183310_6_+1       |
| Ctxn1          | 0.442  | 0.377  | -1.025 | -1.073 | -1.240 | -1.586 | -0.229 | -0.640 | -1.171 | -3.459 | 330695        | CTXN1      | NM_183315_8_-1       |
| Snacp5         | 6.559  | 5.391  | 5.911  | 4.783  | 6.114  | 4.981  | 6.187  | 4.925  | 5.325  | 4.110  | 330959        | SNAPC5     | NM_183316_9_+1       |
| Xkrx           | 5.442  | 5.775  | 2.028  | 1.375  | -0.124 | 0.403  | -0.158 | 1.356  | -2.172 | -1.603 | 331524        | XKRX       | NM_183319_X_-1       |
| Proser3        | 0.899  | 1.735  | 0.353  | 0.840  | 1.116  | 0.759  | 1.028  | 0.962  | 0.769  | 1.046  | 333193        | NA         | NM_183321_7_-1       |
| Slc12a1        | -4.981 | -4.981 | -4.971 | -3.398 | -4.981 | -4.981 | -4.935 | -4.700 | -4.981 | -4.981 | 20495         | SLC12A1    | NM_183354_2_+1       |
| Pbx1           | 0.678  | 1.223  | 3.589  | 3.014  | -2.161 | -2.182 | -1.786 | -0.006 | 1.119  | -0.350 | 18514         | PBX1       | NM_183355_1_-1       |
| Gadd45gip1     | 6.171  | 4.107  | 5.510  | 4.281  | 5.512  | 4.026  | 5.797  | 4.238  | 4.630  | 3.494  | 102060        | GADD45GIP1 | NM_183358_8_+1       |
| Sytl3          | -0.390 | -0.293 | -2.033 | -2.913 | -4.450 | -4.070 | -4.982 | -4.235 | -4.981 | -4.981 | 83672         | SYTL3      | NM_183368_17_+1      |
| Sytl3          | -4.216 | -4.546 | -4.851 | -4.963 | -4.956 | -4.960 | -4.915 | -4.931 | -3.531 | -4.981 | 83672         | SYTL3      | NM_183370_17_+1      |
| Duxbl1         | -1.829 | -4.981 | -4.955 | -4.784 | -4.978 | -4.940 | -4.981 | -4.981 | -4.981 | -4.981 | 278672        | NA         | NM_183389_14_+1      |
| Duxbl1         | -4.981 | -4.981 | -4.927 | -4.401 | -4.977 | -4.917 | -4.981 | -4.981 | -4.981 | -4.981 | 278672        | NA         | NM_183389_dup1_14_+2 |
| Klhl6          | 7.266  | 7.342  | 6.636  | 6.705  | 4.641  | 4.525  | 5.443  | 6.224  | 6.100  | 5.508  | 239743        | KLHL6      | NM_183390_16_-1      |
| Tnfsf18        | -4.981 | -4.981 | -0.158 | -2.245 | -2.399 | -4.196 | -4.412 | -2.650 | -4.981 | -4.981 | 240873        | TNFSF18    | NM_183391_1_+1       |
| Nup54          | 4.373  | 4.365  | 5.006  | 4.969  | 4.984  | 4.840  | 4.917  | 4.855  | 4.587  | 4.587  | 269113        | NUP54      | NM_183392_5_-1       |
| Cox6b2         | -1.036 | 0.360  | 1.162  | 1.559  | 1.845  | 2.486  | 2.934  | 3.601  | 2.286  | 2.505  | 333182        | COX6B2     | NM_183405_7_-1       |
| Cox6b2         | -2.407 | -4.048 | -0.451 | -1.606 | -0.874 | 0.255  | 0.808  | 1.496  | 0.703  | 0.864  | 333182        | COX6B2     | NM_183406_7_-1       |
| Pde4a          | 2.550  | 2.697  | 2.750  | 2.789  | 2.834  | 1.838  | 2.155  | 1.755  | 3.167  | 3.001  | 18577         | PDE4A      | NM_183408_9_+1       |
| Cdk2           | 2.700  | 2.810  | 3.534  | 3.963  | 4.537  | 4.325  | 3.797  | 4.044  | 3.800  | 4.012  | 12566         | CDK2       | NM_183417_10_-1      |
| Pla2g12a       | -4.625 | -0.894 | -2.504 | -1.544 | -3.621 | -1.265 | -1.585 | 0.392  | -1.219 | -4.648 | 66350         | PLA2G12A   | NM_183423_3_+1       |
| Qrpf           | -0.158 | -1.656 | -2.501 | -2.116 | -0.313 | -1.574 | -0.596 | -1.481 | -0.732 | -1.726 | 227717        | QRPFP      | NM_183424_2_-1       |
| Sbno2          | 4.951  | 4.905  | 6.439  | 6.643  | 7.114  | 7.128  | 6.987  | 6.711  | 7.273  | 7.536  | 216161        | SBNO2      | NM_183426_10_-1      |
| Epb41          | -0.872 | -2.558 | 0.048  | -1.109 | -2.885 | -0.668 | -2.504 | -2.407 | -2.374 | -0.952 | 269587        | EPB41      | NM_183428_4_-1       |
| Record_removed | 0.801  | -1.036 | -0.168 | -0.756 | 0.259  | -0.757 | 0.557  | 0.480  | -1.549 | -3.231 | Record_remove | NA         | NM_184052_10_+1      |
| Calu           | 4.484  | 4.023  | 4.875  | 5.198  | 4.533  | 4.627  | 4.516  | 5.100  | 5.980  | 6.244  | 12321         | CALU       | NM_184053_6_+1       |
| Dennd4c        | 3.114  | 3.083  | 2.424  | 2.524  | 2.099  | 2.363  | 3.071  | 3.602  | 4.472  | 5.224  | 329877        | DENND4C    | NM_184088_4_+1       |
| Rtn4           | 3.190  | 2.716  | 4.176  | 3.533  | 3.502  | 3.391  | 3.875  | 2.374  | 3.815  | 3.617  | 68585         | RTN4       | NM_194051_11_+1      |
| Rtn4           | -0.211 | 3.174  | 3.785  | 4.288  | 2.168  | 3.812  | 3.438  | 3.894  | 5.445  | 5.955  | 68585         | RTN4       | NM_194052_11_+1      |
| Rtn4           | 0.456  | 0.333  | 2.635  | 1.724  | 0.624  | 0.904  | -0.073 | -1.442 | 2.860  | 2.422  | 68585         | RTN4       | NM_194053_11_+1      |
| Rtn4           | 1.811  | 0.825  | -0.522 | 2.871  | 2.167  | 3.270  | 0.561  | 2.928  | 1.246  | 2.883  | 68585         | RTN4       | NM_194054_11_+1      |
| Esrp1          | -0.349 | -4.981 | -4.951 | -4.789 | -4.961 | -4.961 | -4.981 | -4.981 | -4.981 | -4.981 | 207920        | ESRP1      | NM_194055_4_-1       |
| Ffar1          | -4.981 | -4.981 | -4.778 | -3.473 | -0.660 | -1.375 | -2.649 | -3.496 | -4.981 | -4.981 | 233081        | FFAR1      | NM_194057_7_-1       |
| Nanos3         | 0.519  | -0.312 | -2.823 | -3.828 | -3.532 | -3.923 | -3.648 | -4.720 | -2.608 | -3.797 | 244551        | NANOS3     | NM_194059_8_-1       |
| D630045J12Rik  | -0.427 | 1.477  | 0.740  | 3.026  | -2.122 | -1.311 | -2.251 | -2.721 | -4.981 | -4.981 | 330286        | KIAA1549   | NM_194061_6_-1       |
| Ifi27          | -2.600 | -4.981 | -4.945 | -4.098 | -2.757 | -3.002 | -3.757 | -3.059 | -4.973 | -4.977 | 52668         | NA         | NM_194066_12_+1      |
| Ifi27          | 4.881  | 3.415  | 2.694  | 1.237  | 5.808  | 4.567  | 5.073  | 3.686  | 2.386  | 2.130  | 52668         | NA         | NM_194067_12_+1      |
| Ifi27          | 0.519  | -0.070 | -2.493 | -3.000 | 1.614  | 0.617  | 0.965  | -0.914 | -2.193 | -1.280 | 52668         | NA         | NM_194068_12_+1      |
| Ifi27          | -0.561 | -0.839 | -2.636 | -3.780 | 0.515  | -0.949 | 0.833  | -2.109 | -1.504 | -2.164 | 52668         | NA         | NM_194069_12_+1      |
| Fam118b        | 4.670  | 4.388  | 4.289  | 4.239  | 4.480  | 3.972  | 4.674  | 4.851  | 4.484  | 4.918  | 109229        | FAM118B    | NM_194257_9_-1       |
| Arid4b         | 5.678  | 5.598  | 5.355  | 5.446  | 5.739  | 5.862  | 5.175  | 4.959  | 4.855  | 4.629  | 94246         | ARID4B     | NM_194262_13_+1      |
| Onecut2        | -4.981 | -3.408 | -2.074 | 0.944  | -3.294 | -1.439 | -4.247 | -4.721 | -4.981 | -4.206 | 225631        | ONECUT2    | NM_194268_18_+1      |
| Morn2          | 4.030  | 4.188  | 1.335  | 1.523  | 2.266  | 2.753  | 1.924  | 1.686  | 0.211  | 0.195  | 378462        | MORN2      | NM_194269_17_+1      |
| Fxyd1          | -4.981 | -4.981 | -4.975 | -4.975 | -4.975 | -4.981 | -4.947 | -4.925 | -4.981 | -4.981 | 56188         | FXYD1      | NM_194321_7_-1       |
| Slc23a3        | -4.981 | -2.600 | -3.767 | -4.659 | -4.589 | -4.485 | -3.641 | -4.401 | -3.738 | -4.342 | 22626         | SLC23A3    | NM_194333_1_-1       |
| Tbc1d2b        | 4.292  | 4.419  | 3.020  | 3.227  | 3.583  | 3.278  | 5.029  | 5.221  | 6.682  | 7.070  | 67016         | TBC1D2B    | NM_194334_9_-1       |
| Naif1          | 2.573  | 2.624  | 3.306  | 3.694  | 3.286  | 3.755  | 3.136  | 3.274  | 3.427  | 3.519  | 71254         | NAIF1      | NM_194335_2_+1       |
| Gbp6           | 5.214  | 4.555  | -0.905 | -0.216 | -0.110 | 0.371  | 0.245  | 2.020  | 2.378  | 3.097  | 100702        | GBP6       | NM_194336_5_-1       |

|               |        |        |        |        |        |        |        |        |        |        |        |           |                 |
|---------------|--------|--------|--------|--------|--------|--------|--------|--------|--------|--------|--------|-----------|-----------------|
| Bms1          | 3.991  | 4.264  | 4.547  | 4.694  | 4.923  | 4.895  | 4.767  | 5.000  | 5.225  | 5.346  | 213895 | BMS1      | NM_194339_6_-1  |
| Prr14l        | 4.595  | 4.618  | 5.636  | 5.506  | 5.632  | 5.445  | 5.110  | 4.920  | 4.584  | 4.803  | 215476 | PRR14L    | NM_194340_5_-1  |
| Synrg         | 4.595  | 5.159  | 6.414  | 6.180  | 4.675  | 4.891  | 4.902  | 4.993  | 4.922  | 4.757  | 217030 | SYNRG     | NM_194341_11_+1 |
| Sun2          | 1.531  | 1.941  | 0.781  | -1.029 | 1.246  | 1.231  | 1.713  | 1.080  | 1.368  | -1.966 | 223697 | SUN2      | NM_194342_15_-1 |
| Trim45        | 1.421  | 1.203  | -0.384 | -1.016 | -0.616 | -1.013 | -1.737 | -1.493 | -1.845 | -1.585 | 229644 | TRIM45    | NM_194343_3_+1  |
| Sh3tc1        | 4.185  | 4.158  | 5.270  | 5.098  | 4.427  | 4.174  | 4.319  | 4.504  | 5.956  | 6.100  | 231147 | SH3TC1    | NM_194344_5_-1  |
| Fam160b2      | 3.936  | 4.285  | 3.916  | 3.935  | 4.215  | 4.300  | 4.112  | 4.127  | 4.707  | 4.743  | 239170 | FAM160B2  | NM_194345_14_-1 |
| Rnf31         | 4.335  | 4.457  | 4.753  | 4.679  | 4.621  | 4.273  | 4.707  | 4.582  | 5.395  | 5.195  | 268749 | RNF31     | NM_194346_14_+1 |
| Atg2a         | 3.373  | 3.465  | 4.780  | 4.558  | 4.909  | 4.875  | 4.846  | 4.714  | 5.439  | 5.142  | 329015 | ATG2A     | NM_194348_19_+1 |
| Spire1        | -4.222 | -2.567 | 2.963  | 3.211  | 5.437  | 5.385  | 4.548  | 3.742  | 1.627  | 2.106  | 68166  | SPIRE1    | NM_194355_18_-1 |
| Cdk10         | 3.267  | 2.800  | 1.625  | 2.119  | 2.434  | 2.351  | 1.327  | 1.837  | 2.408  | 1.613  | 234854 | CDK10     | NM_194444_8_+1  |
| Cdk10         | 4.115  | 4.242  | 4.007  | 3.892  | 3.131  | 3.631  | 3.398  | 3.771  | 3.329  | 3.586  | 234854 | CDK10     | NM_194446_8_+1  |
| Akap9         | 6.336  | 6.761  | 6.348  | 6.360  | 6.237  | 6.951  | 5.782  | 6.201  | 4.972  | 5.607  | 100986 | NA        | NM_194462_5_+1  |
| Mrv1          | -3.900 | -3.343 | -4.007 | -2.578 | -3.628 | -4.871 | -4.754 | -4.888 | -1.350 | -4.651 | 17540  | MRV11     | NM_194464_7_-1  |
| Ifnz          | -2.314 | -4.981 | -4.970 | -4.970 | -4.768 | -4.974 | -3.874 | -4.971 | -3.088 | -4.087 | 319146 | NA        | NM_197889_4_+1  |
| Wipf2         | 3.114  | 3.522  | 3.827  | 3.806  | 3.807  | 3.694  | 3.600  | 3.379  | 3.288  | 3.405  | 68524  | WIPF2     | NM_197940_11_+1 |
| Sgsm2         | 0.030  | 1.397  | 1.728  | 1.591  | 1.798  | 1.811  | 0.837  | 0.835  | 1.240  | 0.766  | 97761  | SGSM2     | NM_197943_11_-1 |
| Hsh2d         | 4.204  | 3.874  | 3.929  | 3.577  | 4.951  | 4.682  | 4.319  | 3.353  | 3.183  | 1.553  | 209488 | HSH2D     | NM_197944_8_+1  |
| Lzts3         | -4.852 | -4.450 | -4.368 | -3.512 | -2.915 | -2.660 | -2.702 | -2.725 | -4.694 | -3.745 | 241638 | LZTS3     | NM_197945_2_-1  |
| Kif18b        | -1.901 | -2.883 | 1.279  | 1.483  | 2.322  | 1.860  | 2.025  | 1.767  | 0.909  | 0.974  | 70218  | KIF18B    | NM_197959_11_-1 |
| Uqcr10        | 7.440  | 7.710  | 7.293  | 7.199  | 7.138  | 7.207  | 7.404  | 7.249  | 6.393  | 6.090  | 66152  | UQCR10    | NM_197979_11_-1 |
| Cox19         | 4.982  | 4.915  | 4.660  | 4.714  | 4.725  | 4.612  | 4.940  | 4.633  | 4.284  | 4.314  | 68033  | COX19     | NM_197980_5_-1  |
| Ddx39         | 7.222  | 7.227  | 6.937  | 6.974  | 7.129  | 6.941  | 6.835  | 6.886  | 6.135  | 5.806  | 68278  | DDX39A    | NM_197982_8_+1  |
| Adipor2       | 6.295  | 5.972  | 5.762  | 5.491  | 4.846  | 5.050  | 4.929  | 4.795  | 5.100  | 4.914  | 68465  | ADIPOR2   | NM_197985_6_-1  |
| Tmem140       | 3.227  | 2.562  | 4.744  | 4.649  | 3.004  | 2.386  | 2.876  | 2.883  | 3.481  | 3.070  | 68487  | TMEM140   | NM_197986_6_+1  |
| Trim37        | 3.705  | 3.891  | 4.254  | 4.383  | 5.017  | 5.151  | 4.515  | 4.070  | 2.987  | 3.451  | 68729  | TRIM37    | NM_197987_11_+1 |
| 1190005106Rik | 0.929  | -0.413 | -4.167 | -4.924 | -3.477 | -4.405 | -2.749 | -4.290 | -4.981 | -4.970 | 68918  | C16orf74  | NM_197988_8_-1  |
| Fam58b        | 5.130  | 5.168  | 4.088  | 4.092  | 4.162  | 4.351  | 4.096  | 4.485  | 4.064  | 4.079  | 69109  | FAM58A    | NM_197989_11_-1 |
| 1700025G04Rik | 1.252  | 2.027  | 6.414  | 6.270  | 4.502  | 3.961  | 5.522  | 5.543  | 4.066  | 4.515  | 69399  | C1orf21   | NM_197990_1_-1  |
| Emc10         | 6.655  | 6.543  | 5.312  | 5.588  | 5.688  | 6.011  | 5.711  | 5.842  | 5.860  | 5.639  | 69683  | EMC10     | NM_197991_7_-1  |
| Pcgf1         | 4.391  | 4.551  | 3.744  | 3.709  | 4.102  | 4.331  | 3.958  | 3.904  | 3.539  | 3.534  | 69837  | PCGF1     | NM_197992_6_+1  |
| Tut1          | 3.946  | 3.991  | 4.052  | 4.202  | 4.187  | 4.173  | 3.951  | 3.892  | 3.670  | 3.408  | 70044  | TUT1      | NM_197993_19_+1 |
| Arl16         | 4.085  | 4.366  | 3.791  | 3.881  | 3.671  | 3.821  | 3.738  | 3.787  | 3.529  | 3.257  | 70317  | ARL16     | NM_197995_11_-1 |
| Tspan15       | 1.538  | 0.260  | 0.339  | 0.696  | 1.138  | 0.454  | 1.192  | 2.907  | -0.453 | -1.677 | 70423  | TSPAN15   | NM_197996_10_-1 |
| Zgrf1         | -1.066 | 1.631  | 0.728  | 2.007  | 2.561  | 3.105  | 1.257  | 2.593  | 0.103  | 1.632  | 71643  | ZGRF1     | NM_197997_3_+1  |
| Cdpf1         | 3.753  | 4.027  | 2.603  | 2.681  | 2.891  | 2.977  | 2.702  | 2.043  | 2.705  | 2.352  | 72355  | CDPF1     | NM_197998_15_-1 |
| Ces2g         | -2.388 | -1.399 | -3.620 | 2.210  | -0.616 | 2.419  | -1.631 | 2.671  | -0.610 | -0.447 | 72361  | NA        | NM_197999_8_+1  |
| 1700001022Rik | -4.981 | -4.981 | -4.937 | -4.937 | -3.784 | -3.740 | -3.562 | -4.992 | -4.981 | -4.981 | 73598  | C9orf50   | NM_198000_2_-1  |
| 1110008P14Rik | 6.233  | 6.193  | 5.073  | 4.798  | 4.764  | 4.902  | 5.008  | 4.790  | 4.864  | 4.337  | 73737  | C9orf16   | NM_198001_2_-1  |
| Zfp946        | 3.466  | 3.644  | 3.608  | 3.617  | 2.734  | 2.887  | 2.899  | 2.841  | 2.665  | 3.415  | 74149  | NA        | NM_198003_17_+1 |
| Idnk          | 3.331  | 2.617  | 2.264  | 2.554  | 2.467  | 2.753  | 2.385  | 1.881  | 2.001  | 2.356  | 75731  | IDNK      | NM_198004_13_+1 |
| Dcaf17        | -0.218 | 2.022  | 0.150  | 1.219  | -0.446 | 1.255  | 0.728  | 1.064  | 1.384  | 1.543  | 75763  | DCAF17    | NM_198005_2_+1  |
| Coa5          | 6.501  | 6.385  | 7.502  | 7.559  | 6.150  | 6.406  | 6.545  | 6.733  | 6.750  | 7.167  | 76178  | COA5      | NM_198006_1_-1  |
| Ascc3         | 4.864  | 4.996  | 5.411  | 5.289  | 5.534  | 5.508  | 5.264  | 5.350  | 5.553  | 5.646  | 77987  | ASCC3     | NM_198007_10_+1 |
| Ankrd17       | 5.151  | 4.579  | 4.905  | 4.662  | 4.799  | 4.539  | 5.033  | 4.516  | 4.328  | 4.258  | 81702  | ANKRD17   | NM_198010_5_-1  |
| E430018J23Rik | 2.004  | 2.314  | 1.612  | 1.986  | 0.840  | 0.692  | 0.961  | 0.410  | 1.124  | 1.203  | 101604 | NA        | NM_198011_7_-1  |
| Trim68        | 3.113  | 2.287  | 2.303  | 2.588  | 2.247  | 1.895  | 1.027  | 0.622  | 1.039  | 0.299  | 101700 | TRIM68    | NM_198012_7_-1  |
| Cuedc1        | 0.136  | 2.242  | 1.531  | 1.226  | -0.395 | 1.079  | -0.150 | -0.343 | -4.834 | -2.365 | 103841 | CUEDC1    | NM_198013_11_+1 |
| Slain1        | 4.106  | 4.248  | 2.552  | 2.503  | 3.751  | 3.896  | 2.000  | 2.159  | -2.396 | -2.033 | 105439 | SLAIN1    | NM_198014_14_+1 |
| Fam175b       | 4.777  | 4.966  | 5.679  | 5.747  | 5.577  | 5.647  | 5.538  | 5.267  | 5.664  | 5.756  | 109359 | FAM175B   | NM_198017_7_+1  |
| Abr           | 0.681  | -1.325 | -0.917 | -1.086 | 0.901  | 1.286  | -1.261 | -1.932 | 1.239  | 0.698  | 109934 | ABR       | NM_198018_11_-1 |
| Cep78         | 3.132  | 3.470  | 2.732  | 2.567  | 2.642  | 2.243  | 1.714  | 2.059  | 3.169  | 2.700  | 208518 | CEP78     | NM_198019_19_-1 |
| Trmt1         | -3.229 | 3.764  | 0.764  | 4.013  | -0.701 | 3.943  | -1.855 | 4.072  | -0.583 | 3.355  | 212528 | TRMT1     | NM_198020_8_+1  |
| Scyl2         | 1.631  | 2.790  | 2.719  | 3.757  | 2.355  | 3.172  | 2.433  | 3.339  | 3.735  | 4.471  | 213326 | SCYL2     | NM_198021_10_-1 |
| Tnrc6c        | 4.718  | 4.682  | 4.390  | 4.278  | 5.009  | 4.842  | 4.824  | 4.276  | 4.904  | 4.465  | 217351 | TNRC6C    | NM_198022_11_+1 |
| Rcor1         | 3.994  | 3.550  | 4.065  | 4.034  | 4.015  | 4.120  | 3.767  | 3.717  | 4.076  | 3.845  | 217864 | RCOR1     | NM_198023_12_+1 |
| Ranbp3l       | -4.981 | -2.808 | -2.670 | -4.228 | -3.687 | -4.694 | -4.488 | -4.718 | -2.456 | -3.313 | 223332 | RANBP3L   | NM_198024_15_+1 |
| Iqcc          | 3.054  | 2.124  | 2.961  | 2.502  | 3.255  | 2.570  | 2.898  | 2.486  | 2.887  | 2.681  | 230767 | IQCC      | NM_198026_4_-1  |
| Alkbh6        | 5.988  | 5.849  | 5.511  | 5.573  | 5.711  | 5.654  | 5.568  | 5.248  | 4.020  | 4.113  | 233065 | ALKBH6    | NM_198027_7_+1  |
| Serpinb10     | -2.105 | -4.981 | 4.994  | 4.819  | 4.165  | 3.241  | 6.587  | 6.273  | 8.592  | 6.989  | 241197 | SERPINB10 | NM_198028_1_+1  |
| Tubgcp3       | 4.172  | 4.209  | 4.698  | 4.506  | 4.823  | 4.945  | 4.612  | 4.877  | 5.180  | 5.189  | 259279 | TUBGCP3   | NM_198031_8_-1  |
| Setx          | 4.947  | 5.085  | 5.500  | 5.292  | 5.459  | 5.429  | 5.252  | 5.316  | 5.521  | 6.013  | 269254 | SETX      | NM_198033_2_+1  |
| Sidt1         | -0.718 | -4.981 | -0.089 | -1.216 | -3.883 | -0.675 | -2.231 | 1.217  | -2.254 | -4.510 | 320007 | SIDT1     | NM_198034_16_-1 |
| Zbtb39        | -0.461 | -0.253 | 0.863  | -0.034 | 0.449  | 0.501  | 0.694  | -0.352 | 1.054  | 0.985  | 320080 | ZBTB39    | NM_198035_10_+1 |
| Cachd1        | -4.981 | -0.337 | -2.672 | -1.170 | -2.460 | -1.720 | -4.175 | -2.158 | -3.471 | -2.207 | 320508 | CACHD1    | NM_198037_4_+1  |
| Prx           | -4.981 | -4.981 | -4.662 | -4.330 | -4.973 | -4.277 | -4.952 | -4.538 | -2.953 | -4.981 | 19153  | PRX       | NM_198048_7_+1  |
| Tbx3          | -4.981 | -4.981 | -4.969 | -4.706 | -4.628 | -3.719 | -4.901 | -4.916 | -4.981 | -4.981 | 21386  | TBX3      | NM_198052_5_+1  |
| Nrap          | -4.981 | -4.981 | -4.980 | -4.798 | -4.912 | -4.956 | -4.981 | -4.981 | -4.981 | -4.981 | 18175  | NRAP      | NM_198059_19_-1 |
| Hnrnpa3       | -0.639 | -0.666 | -1.003 | -0.361 | -0.188 | -1.860 | 0.195  | -1.129 | 0.577  | -0.904 | 229279 | NA        | NM_198090_2_+1  |
| Usp2          | 1.448  | 2.332  | -4.635 | -2.394 | -2.870 | -2.534 | -0.517 | 0.303  | -0.796 | 1.312  | 53376  | USP2      | NM_198091_9_+1  |
| Usp2          | 0.589  | 0.816  | -4.667 | -4.809 | -2.949 | -3.137 | -4.344 | -4.254 | -4.436 | -4.981 | 53376  | USP2      | NM_198092_9_+1  |
| Elmo1         | -4.981 | -4.981 | -4.289 | -4.642 | -4.154 | -3.988 | -3.831 | -3.979 | -2.162 | -4.981 | 140580 | ELMO1     | NM_198093_13_+1 |
| Brd4          | 6.240  | 6.314  | 6.328  | 6.461  | 6.767  | 6.791  | 6.436  | 6.602  | 6.582  | 6.510  | 57261  | NA        | NM_198094_17_-1 |
| Bst2          | 11.428 | 11.745 | 6.717  | 6.381  | 5.983  | 6.141  | 6.530  | 6.557  | 6.433  | 5.597  | 69550  | NA        | NM_198095_8_-1  |

|               |        |        |        |        |        |        |        |        |        |        |        |          |                 |
|---------------|--------|--------|--------|--------|--------|--------|--------|--------|--------|--------|--------|----------|-----------------|
| Arap1         | 3.371  | 3.587  | 0.477  | 1.262  | -1.701 | -0.113 | 2.990  | 1.631  | 0.105  | 0.092  | 69710  | ARAP1    | NM_198096_7_+1  |
| Tbkbp1        | -1.635 | -4.981 | 2.066  | 2.225  | 0.745  | 1.047  | 2.185  | 2.227  | 3.706  | 4.100  | 73174  | TBKBP1   | NM_198100_11_-1 |
| Gnip          | 4.577  | 4.775  | 6.404  | 6.393  | 6.662  | 6.587  | 6.468  | 6.543  | 7.248  | 7.099  | 78816  | GNIP     | NM_198101_8_+1  |
| Tra2a         | 5.317  | 5.287  | 5.182  | 5.051  | 5.297  | 5.413  | 5.060  | 4.905  | 3.970  | 4.656  | 101214 | TRA2A    | NM_198102_6_-1  |
| Exoc8         | 2.519  | 2.959  | 3.172  | 3.325  | 3.200  | 2.829  | 3.107  | 3.075  | 4.428  | 4.249  | 102058 | EXOC8    | NM_198103_8_-1  |
| Tcte3         | -3.120 | -4.981 | -3.394 | -3.170 | -2.132 | -3.869 | -1.478 | -3.877 | -4.981 | -3.887 | 21647  | TCTE3    | NM_198104_17_-1 |
| Fam120c       | 2.575  | 2.039  | 1.566  | 1.552  | 2.046  | 2.168  | 1.377  | 1.559  | 1.154  | 1.723  | 207375 | FAM120C  | NM_198105_X_+1  |
| Slc9c1        | -4.981 | -4.981 | -4.974 | -4.443 | -4.987 | -4.872 | -4.962 | -4.590 | -4.394 | -4.981 | 208169 | SLC9C1   | NM_198106_16_+1 |
| Med16         | 5.423  | 5.258  | 4.431  | 4.558  | 4.585  | 4.293  | 4.366  | 4.295  | 5.590  | 4.949  | 216154 | MED16    | NM_198107_10_-1 |
| Morn4         | -4.981 | 0.159  | -1.636 | 1.638  | -2.891 | 1.792  | -4.747 | 0.268  | -4.981 | -1.588 | 226123 | MORN4    | NM_198108_19_-1 |
| Ssh1          | 0.566  | 0.602  | 3.163  | 3.365  | 3.981  | 3.802  | 3.599  | 3.177  | 4.390  | 4.198  | 231637 | SSH1     | NM_198109_5_-1  |
| Gnl3l         | 4.363  | 4.181  | 4.592  | 4.817  | 4.593  | 4.787  | 3.978  | 4.113  | 3.982  | 4.207  | 237107 | GNL3L    | NM_198110_X_-1  |
| Ssh3          | 0.373  | 0.615  | -0.830 | -0.766 | -0.986 | -1.538 | -0.443 | -0.851 | 0.246  | 0.948  | 245857 | SSH3     | NM_198113_19_-1 |
| Dagla         | -4.981 | -4.981 | -4.848 | -4.848 | -4.970 | -4.799 | -3.263 | -2.720 | -1.170 | 0.541  | 269060 | DAGLA    | NM_198114_19_-1 |
| Lrrc24        | -2.759 | -0.566 | -1.827 | -2.002 | -2.397 | -2.303 | -2.575 | -3.346 | -0.392 | -2.036 | 378937 | LRRC24   | NM_198119_15_-1 |
| Arid4b        | 5.596  | 5.954  | 5.426  | 5.104  | 5.542  | 6.005  | 5.008  | 5.088  | 3.256  | 3.981  | 94246  | ARID4B   | NM_198122_13_+1 |
| Abi2          | 2.026  | 2.815  | 3.866  | 3.433  | 3.396  | 2.910  | 2.553  | 2.788  | 3.341  | 3.665  | 329165 | ABI2     | NM_198127_1_+1  |
| Smarcc2       | 2.528  | 3.855  | 2.820  | 2.312  | 2.172  | 2.134  | 2.454  | 2.535  | 1.559  | 1.059  | 68094  | SMARCC2  | NM_198160_10_+1 |
| Bhlhb9        | -1.294 | -0.237 | 0.093  | 0.313  | -0.464 | 0.013  | -1.044 | -0.837 | -4.657 | -4.495 | 70237  | BHLHB9   | NM_198161_X_+1  |
| Morc2         | 2.903  | 2.287  | 5.225  | 5.235  | 3.916  | 4.138  | 3.247  | 2.992  | 1.275  | 1.967  | 74522  | MORC2    | NM_198162_11_+1 |
| Rab35         | 3.785  | 3.694  | 4.095  | 3.992  | 3.386  | 3.393  | 3.572  | 3.463  | 4.080  | 4.106  | 77407  | RAB35    | NM_198163_5_+1  |
| Cdk19         | 3.173  | 2.103  | 1.542  | -0.137 | 1.151  | 1.726  | 1.709  | 1.212  | 0.341  | 0.491  | 78334  | CDK19    | NM_198164_10_+1 |
| Tmem63b       | 1.263  | 1.311  | 2.881  | 2.982  | 3.488  | 2.911  | 2.909  | 2.410  | 2.885  | 2.841  | 224807 | TMEM63B  | NM_198167_17_-1 |
| Ppp2r5b       | 2.404  | 2.334  | 2.584  | 2.978  | 2.541  | 2.785  | 2.208  | 2.676  | 3.392  | 3.849  | 225849 | PPP2R5B  | NM_198168_19_-1 |
| Gmeb2         | 2.592  | 3.082  | 3.058  | 3.044  | 3.302  | 2.855  | 2.779  | 3.120  | 4.035  | 3.669  | 229004 | GMEB2    | NM_198169_2_-1  |
| Szt2          | 3.663  | 3.701  | 3.478  | 3.621  | 4.213  | 4.122  | 3.902  | 3.553  | 3.443  | 3.176  | 230676 | SZT2     | NM_198170_4_-1  |
| Fastkd5       | -1.481 | 1.915  | 2.614  | 1.994  | 1.689  | 1.332  | 1.875  | 2.347  | 3.066  | 2.687  | 380601 | FASTKD5  | NM_198176_2_-1  |
| Ntf5          | -4.981 | -2.160 | -2.989 | -2.734 | -4.965 | -4.284 | -4.068 | -4.548 | -4.981 | -4.981 | 78405  | NTF4     | NM_198190_7_+1  |
| Raet1e        | -4.981 | -4.981 | -4.950 | -4.832 | -2.677 | -3.761 | -3.825 | -3.835 | -0.593 | -3.252 | 379043 | NA       | NM_198193_10_+1 |
| Snph          | -4.310 | -3.827 | -4.976 | -4.788 | -4.975 | -4.945 | -4.981 | -4.953 | -4.981 | -4.874 | 241727 | SNPH     | NM_198214_2_-1  |
| Aspscr1       | 2.120  | 2.542  | 2.288  | 3.045  | 3.101  | 2.698  | 3.131  | 2.704  | 3.437  | 3.490  | 68938  | ASPSCR1  | NM_198223_11_+1 |
| Yars2         | 3.682  | 3.523  | 3.419  | 3.376  | 3.417  | 3.313  | 3.206  | 3.594  | 2.467  | 2.752  | 70120  | YARS2    | NM_198246_16_+1 |
| Zbtb40        | 1.996  | 1.964  | 1.945  | 1.681  | 1.804  | 1.747  | 2.088  | 2.046  | 2.538  | 3.062  | 230848 | ZBTB40   | NM_198248_4_-1  |
| Arhgef40      | -2.623 | -4.981 | 3.999  | 5.167  | 2.995  | 3.483  | 2.974  | 3.049  | -4.229 | -1.535 | 268739 | ARHGEF40 | NM_198249_14_+1 |
| Lrrc4b        | -4.981 | -4.981 | -4.981 | -4.981 | -4.962 | -4.046 | -4.981 | -4.981 | -4.981 | -4.981 | 272381 | LRRC4B   | NM_198250_7_+1  |
| Tex2          | 7.425  | 7.665  | 4.259  | 4.173  | 2.739  | 3.034  | 3.774  | 3.763  | 5.377  | 5.450  | 21763  | TEX2     | NM_198292_11_-1 |
| Tanc1         | 2.039  | 2.085  | 2.340  | 1.833  | -0.323 | 0.820  | -4.501 | -0.026 | -4.469 | 0.455  | 66860  | TANC1    | NM_198294_2_+1  |
| Tmx3          | 5.555  | 5.869  | 6.359  | 6.059  | 5.854  | 5.987  | 5.999  | 6.067  | 6.433  | 7.228  | 67988  | TMX3     | NM_198295_18_+1 |
| 9130011E15Rik | 2.221  | 2.373  | 3.414  | 3.775  | 3.247  | 3.549  | 2.888  | 3.271  | 3.856  | 4.033  | 71617  | C10orf76 | NM_198296_19_-1 |
|               | -2.483 | -4.981 | -2.999 | -2.306 | -2.982 | -0.534 | -2.708 | -0.006 | -4.981 | -2.057 | 77647  | TRAT1    | NM_198297_16_-1 |
| Helz          | 4.068  | 3.979  | 4.576  | 4.550  | 4.952  | 4.863  | 4.315  | 4.444  | 4.187  | 4.340  | 78455  | HELZ     | NM_198298_11_+1 |
| Enkd1         | 3.812  | 2.868  | 2.310  | 1.453  | 2.278  | 2.170  | 1.262  | 1.464  | 0.712  | -0.292 | 102124 | ENKD1    | NM_198299_8_-1  |
| Cpeb3         | -4.216 | -4.395 | -4.523 | -4.565 | -4.705 | -4.919 | -4.771 | -4.432 | -3.873 | -0.509 | 208922 | CPEB3    | NM_198300_19_-1 |
| Fam105a       | 2.846  | 2.247  | 4.135  | 3.827  | 4.410  | 3.859  | 4.660  | 4.125  | 5.252  | 4.240  | 223433 | FAM105A  | NM_198301_15_-1 |
| Rbm11         | -2.227 | -1.793 | -0.983 | -0.914 | -3.220 | -4.345 | -1.925 | -3.947 | -0.236 | -0.668 | 224344 | RBM11    | NM_198302_16_+1 |
| Eif5b         | 6.715  | 6.702  | 7.201  | 7.149  | 6.915  | 7.242  | 7.080  | 6.852  | 5.533  | 5.545  | 226982 | EIF5B    | NM_198303_1_+1  |
| Nup188        | 2.415  | 2.598  | 3.423  | 3.474  | 3.491  | 3.232  | 3.709  | 3.465  | 4.007  | 3.871  | 227699 | NUP188   | NM_198304_2_+1  |
| Klhl17        | 3.792  | 4.400  | 3.957  | 3.856  | 4.323  | 4.605  | 4.035  | 4.132  | 4.571  | 4.411  | 231003 | KLHL17   | NM_198305_4_-1  |
| Pdpr          | 0.637  | -0.336 | 1.200  | 1.080  | 1.183  | 1.035  | 1.370  | 1.218  | 2.884  | 3.048  | 319518 | PDPR     | NM_198308_8_+1  |
| Ttc8          | -3.864 | -4.284 | -4.557 | -4.882 | -4.762 | -4.962 | -3.010 | -4.903 | -2.078 | -1.090 | 76260  | TTC8     | NM_198311_12_+1 |
| Zfp273        | 1.894  | 0.244  | 1.355  | -0.264 | 1.422  | 0.283  | 1.351  | 0.430  | 1.912  | 1.769  | 212569 | ZNF273   | NM_198322_13_+1 |
| Nsf1c         | -0.009 | 0.280  | -0.930 | -0.177 | -0.298 | -1.260 | -0.816 | -2.028 | -0.809 | -4.949 | 386649 | NSFL1C   | NM_198326_2_+1  |
| Rai2          | 1.368  | 1.509  | -4.960 | -4.747 | -4.978 | -4.935 | -4.973 | -4.921 | -4.981 | -4.804 | 24004  | RAI2     | NM_198409_X_+1  |
| Inf2          | 3.837  | 3.766  | 2.733  | 3.016  | 3.087  | 2.429  | 2.750  | 2.518  | 3.430  | 3.310  | 70435  | INF2     | NM_198411_12_+1 |
| Dnajc6        | -4.981 | -4.981 | -4.922 | -4.200 | -4.083 | -3.755 | -4.711 | -3.036 | -4.136 | -4.981 | 72685  | DNAJC6   | NM_198412_4_+1  |
| Paqr9         | 1.044  | 0.422  | -0.257 | 1.199  | 0.862  | 1.542  | 0.766  | 2.111  | -0.909 | -0.420 | 75552  | PAQR9    | NM_198414_9_+1  |
| Zfp607b       | -3.773 | 0.204  | -2.033 | -0.736 | -1.526 | -1.446 | -0.793 | -1.786 | -2.241 | -1.271 | 112415 | ZNF780A  | NM_198417_7_+1  |
| Tdrd6         | -4.981 | -4.981 | -4.981 | -4.981 | -4.680 | -4.821 | -4.972 | -4.977 | -4.490 | -3.920 | 210510 | TDRD6    | NM_198418_17_-1 |
| Arhgap39      | 1.221  | 1.708  | 1.982  | -0.094 | 2.298  | 2.355  | 2.643  | 2.364  | 2.199  | 0.843  | 223666 | ARHGAP39 | NM_198420_15_-1 |
| Usp49         | 0.817  | 1.482  | 1.005  | 0.982  | 1.261  | 1.265  | 0.393  | 0.108  | 0.329  | 0.739  | 224836 | USP49    | NM_198421_17_+1 |
| Paqr3         | -1.077 | 0.416  | -0.437 | -0.987 | -0.502 | -0.927 | -0.571 | -0.572 | 1.804  | 2.032  | 231474 | PAQR3    | NM_198422_5_-1  |
| Bahcc1        | -0.173 | 0.385  | 1.277  | -0.132 | 0.663  | -1.540 | 1.976  | 0.730  | 0.932  | -0.072 | 268515 | BAHCC1   | NM_198423_11_+1 |
| Orai3         | 7.519  | 7.486  | 6.328  | 6.358  | 5.549  | 5.560  | 5.833  | 6.078  | 6.289  | 6.080  | 269999 | ORAI3    | NM_198424_7_+1  |
| Eid2          | 2.146  | 2.716  | 0.088  | 1.360  | 1.796  | 3.336  | -0.338 | 0.643  | -1.040 | -0.248 | 386655 | EID2     | NM_198425_7_+1  |
| Nfatc1        | -2.394 | -1.422 | -1.353 | -0.973 | -0.800 | 0.397  | -1.334 | 0.476  | -1.766 | -1.800 | 18018  | NFATC1   | NM_198429_18_-1 |
| Ssbp3         | 5.101  | 4.596  | 4.154  | 4.435  | 3.969  | 3.866  | 3.618  | 4.322  | 4.019  | 4.258  | 72475  | SSBP3    | NM_198438_4_+1  |
| Map6d1        | -4.981 | -1.910 | -0.981 | -1.602 | -3.150 | -2.376 | -3.763 | -3.688 | -2.605 | -4.981 | 208158 | MAP6D1   | NM_198599_16_-1 |
| Papd7         | 0.553  | 2.147  | 1.705  | 1.994  | 2.270  | 2.583  | 2.167  | 3.026  | 4.184  | 3.983  | 210106 | PAPD7    | NM_198600_13_-1 |
| Cux1          | 3.890  | 1.718  | 4.244  | 3.409  | 4.629  | 3.177  | 4.559  | 3.737  | 5.534  | 4.603  | 13047  | NA       | NM_198602_5_-1  |
| Plekhg6       | -3.843 | -4.981 | -2.536 | -2.637 | -2.099 | -4.626 | -2.319 | -3.590 | -1.194 | -0.831 | 213522 | PLEKHG6  | NM_198604_6_-1  |
| Ska3          | -1.294 | -1.536 | 0.984  | 1.521  | 2.117  | 0.941  | 1.205  | 1.121  | 0.802  | 0.904  | 219114 | SKA3     | NM_198605_14_-1 |
| Dcaf13        | 6.675  | 6.643  | 6.224  | 6.160  | 6.076  | 5.965  | 6.055  | 6.007  | 5.677  | 5.364  | 223499 | DCAF13   | NM_198606_15_+1 |
| Them6         | 3.520  | 0.857  | -0.911 | -1.494 | -1.126 | -2.588 | -0.315 | -0.176 | 1.113  | 1.388  | 223626 | THEM6    | NM_198607_15_+1 |
| Aars2         | 2.248  | 2.640  | 2.545  | 2.315  | 3.172  | 3.066  | 2.997  | 2.875  | 3.100  | 3.082  | 224805 | AARS2    | NM_198608_17_+1 |

|                |        |        |        |        |        |        |        |        |        |        |        |          |                 |
|----------------|--------|--------|--------|--------|--------|--------|--------|--------|--------|--------|--------|----------|-----------------|
| Rsl24d1        | 5.766  | 5.732  | 5.484  | 5.597  | 5.363  | 5.374  | 5.404  | 5.308  | 5.364  | 5.341  | 225215 | RSL24D1  | NM_198609_9_+1  |
| B3gnt4         | -3.686 | -4.981 | -1.351 | -2.234 | -2.408 | -3.883 | -3.192 | -4.154 | -1.974 | -2.606 | 231727 | B3GNT4   | NM_198611_5_+1  |
| Gxylt2         | -4.981 | -4.981 | -4.417 | -4.975 | -4.959 | -4.907 | -4.592 | -4.632 | -4.981 | -4.981 | 232313 | GXYLT2   | NM_198612_6_+1  |
| Ap2s1          | 7.364  | 7.284  | 7.272  | 7.182  | 7.092  | 7.201  | 7.314  | 7.199  | 6.940  | 6.738  | 232910 | AP2S1    | NM_198613_7_+1  |
| Mex3d          | 0.364  | 0.417  | 0.700  | 0.324  | 0.378  | -0.177 | 0.626  | 0.845  | 1.991  | 2.415  | 237400 | MEX3D    | NM_198615_10_-1 |
| Ccdc85b        | 4.640  | 4.458  | 3.884  | 4.049  | 4.301  | 4.410  | 4.415  | 4.199  | 4.271  | 4.006  | 240514 | CCDC85B  | NM_198616_19_-1 |
| Tspyl3         | 4.410  | 4.402  | 3.362  | 3.172  | 4.820  | 4.563  | 4.419  | 3.750  | 4.249  | 3.928  | 241732 | NA       | NM_198617_2_-1  |
| Dlgap3         | -3.090 | -4.981 | -1.864 | -0.170 | 0.501  | 1.256  | -1.947 | -3.048 | -2.288 | -4.981 | 242667 | DLGAP3   | NM_198618_4_+1  |
| Zfp933         | 2.719  | 2.156  | 2.952  | 2.420  | 3.173  | 2.645  | 2.790  | 2.955  | 1.923  | 3.222  | 242747 | NA       | NM_198619_4_-1  |
| Rundc3b        | 1.653  | -1.055 | 0.979  | -2.261 | 3.624  | 1.320  | 1.765  | -1.316 | -4.190 | -4.981 | 242819 | RUNDC3B  | NM_198620_5_-1  |
| Cct8l1         | -4.981 | -4.981 | -4.981 | -4.981 | -4.794 | -4.220 | -4.736 | -4.974 | -4.981 | -4.981 | 242891 | CCT8L2   | NM_198621_5_+1  |
| H1fx           | -4.981 | -2.895 | -2.844 | -2.961 | -3.088 | -3.861 | -3.003 | -2.242 | -4.394 | -4.316 | 243529 | H1FX     | NM_198622_6_-1  |
| Mtss1l         | 1.270  | 0.935  | -1.311 | -0.546 | -2.351 | -3.062 | -2.292 | -3.950 | -3.750 | -4.981 | 244654 | MTSS1L   | NM_198625_8_+1  |
| Xxylt1         | 5.305  | 3.569  | 3.680  | 3.309  | 4.070  | 4.090  | 3.893  | 3.979  | 4.756  | 4.374  | 268880 | XXYLT1   | NM_198626_16_-1 |
| Stkld1         | 0.794  | -0.559 | -0.428 | -0.551 | 1.912  | 1.192  | 0.839  | -0.176 | -1.240 | -1.434 | 279029 | STKLD1   | NM_198628_2_+1  |
| 1810024B03Rik  | -2.268 | -2.087 | -3.414 | -3.723 | -3.298 | -3.214 | -3.019 | -3.071 | -2.340 | -3.797 | 329509 | NA       | NM_198630_2_-1  |
| Zc3h4          | 3.811  | 3.876  | 4.084  | 4.052  | 4.515  | 4.282  | 4.538  | 3.828  | 4.374  | 4.224  | 330474 | ZC3H4    | NM_198631_7_+1  |
| Trim67         | -1.597 | -4.981 | -4.971 | -4.782 | -4.980 | -4.969 | -4.736 | -4.974 | -4.981 | -4.981 | 330863 | TRIM67   | NM_198632_8_+1  |
| Tigd3          | -1.364 | -3.408 | -1.324 | -1.404 | -0.713 | -0.558 | -0.980 | -1.044 | -0.326 | -1.501 | 332359 | TIGD3    | NM_198634_19_-1 |
| Gm5134         | -0.393 | -0.641 | 0.345  | 0.238  | -1.871 | -0.324 | -1.142 | -0.216 | -2.953 | -2.388 | 333669 | NA       | NM_198635_10_+1 |
| 17000216K19Rik | -4.981 | -4.981 | -4.913 | -4.913 | -4.970 | -4.510 | -4.983 | -3.270 | -4.981 | -4.981 | 74230  | C17orf97 | NM_198637_11_+1 |
| Rubcnl         | 6.287  | 6.152  | 6.241  | 6.440  | 6.412  | 6.215  | 5.870  | 5.704  | 5.091  | 4.690  | 271221 | RUBCNL   | NM_198642_14_+1 |
| Zfat           | 0.694  | -0.221 | 0.590  | 0.241  | 0.794  | 0.222  | 1.033  | 0.731  | 1.967  | 2.058  | 380993 | ZFAT     | NM_198644_15_-1 |
| Ccdc58         | 3.937  | 4.016  | 3.071  | 3.227  | 3.072  | 3.015  | 2.727  | 2.592  | 2.165  | 2.296  | 381045 | CCDC58   | NM_198645_16_+1 |
| Tbc1d22b       | 2.551  | 2.480  | 2.370  | 3.113  | 2.176  | 2.543  | 2.008  | 2.079  | 2.815  | 2.919  | 381085 | TBC1D22B | NM_198647_17_+1 |
| 44304021I8Rik  | -1.343 | -0.810 | -3.432 | -3.077 | -3.368 | -4.029 | -2.290 | -2.648 | -1.589 | -3.280 | 381218 | NA       | NM_198651_19_-1 |
| Hjurp          | 2.517  | 2.107  | 2.779  | 1.867  | 3.442  | 1.904  | 3.735  | 1.656  | 3.552  | 2.054  | 381280 | HJURP    | NM_198652_1_-1  |
| Iars2          | 4.340  | 4.118  | 4.667  | 4.647  | 4.741  | 4.581  | 4.432  | 4.520  | 5.274  | 4.774  | 381314 | IARS2    | NM_198653_1_-1  |
| Nsl1           | -1.240 | -1.594 | 3.620  | 3.539  | 3.578  | 2.729  | 3.469  | 2.769  | 3.450  | 2.637  | 381318 | NSL1     | NM_198654_1_+1  |
| Gm5148         | 2.702  | 2.531  | 3.003  | 2.701  | 2.959  | 2.321  | 3.143  | 2.524  | 1.956  | 1.723  | 381438 | NA       | NM_198657_3_-1  |
| Ccdc180        | 1.501  | 1.097  | 0.716  | 0.025  | 2.972  | 3.489  | 3.277  | 3.358  | 4.012  | 3.844  | 381522 | CCDC180  | NM_198660_4_+1  |
| Tbc1d2         | 1.102  | 0.976  | 0.241  | -1.143 | -0.742 | 1.857  | 0.595  | 1.187  | 4.144  | 3.667  | 381605 | TBC1D2   | NM_198664_4_-1  |
| Gse1           | 2.384  | 2.217  | 3.487  | 3.631  | 4.454  | 4.501  | 4.163  | 3.663  | 3.797  | 3.018  | 382034 | GSE1     | NM_198671_8_+1  |
| Fdxacb1        | 4.285  | 4.147  | 3.542  | 3.780  | 3.749  | 3.694  | 3.570  | 3.697  | 3.391  | 3.663  | 382137 | FDXACB1  | NM_198675_9_+1  |
| Celf1          | -4.497 | -4.876 | -4.910 | -4.931 | -4.967 | -4.980 | -4.819 | -3.987 | -4.981 | -4.977 | 13046  | NA       | NM_198683_2_+1  |
| Adgrl3         | -3.668 | -2.997 | 3.600  | 3.904  | 5.308  | 5.783  | 4.041  | 4.519  | -2.809 | 1.172  | 319387 | ADGRL3   | NM_198702_5_+1  |
| Wnk1           | 3.503  | 1.720  | 3.601  | 2.565  | 3.615  | 3.526  | 1.455  | 0.228  | 1.124  | 1.501  | 232341 | WNK1     | NM_198703_6_-1  |
| Sypl           | 6.175  | 5.887  | 5.552  | 5.551  | 5.485  | 5.683  | 6.082  | 6.329  | 6.626  | 6.898  | 19027  | SYPL1    | NM_198710_12_+1 |
| Egfl7          | 0.064  | -4.768 | -4.823 | -3.601 | -3.282 | -3.602 | -4.953 | -1.500 | -4.864 | -2.670 | 353156 | EGFL7    | NM_198724_2_+1  |
| Egfl7          | -1.877 | -4.827 | -4.825 | -2.912 | -4.961 | -4.617 | -4.981 | -4.981 | -4.964 | -4.966 | 353156 | EGFL7    | NM_198725_2_+1  |
| Mrpl48         | 6.491  | 5.928  | 5.848  | 5.617  | 5.790  | 5.402  | 5.575  | 5.243  | 4.856  | 4.396  | 52443  | MRPL48   | NM_198831_7_-1  |
| Lrrc75b        | -3.563 | -3.408 | -3.231 | -2.704 | -4.105 | -3.196 | -3.787 | -2.533 | -4.981 | -2.532 | 192734 | LRRC75B  | NM_198860_10_-1 |
| Lrrc75a        | 2.380  | 2.824  | 1.368  | 1.874  | 2.717  | 1.877  | 2.533  | 2.997  | 2.999  | 3.457  | 192976 | LRRC75A  | NM_198861_11_-1 |
| Nlgn2          | -1.751 | -1.645 | 1.307  | 1.478  | -0.359 | 0.118  | -0.856 | -1.246 | -2.056 | -0.978 | 216856 | NLGN2    | NM_198862_11_-1 |
| Scx            | -3.563 | -4.981 | 0.697  | -0.303 | -4.968 | -4.859 | -3.427 | -4.773 | -4.981 | -4.316 | 20289  | SCX      | NM_198885_15_+1 |
| Zbtb12         | -2.030 | -4.981 | -1.611 | -2.255 | -1.121 | -1.181 | -1.453 | -1.654 | -3.750 | -2.965 | 193736 | ZBTB12   | NM_198886_17_+1 |
| Abr            | 3.721  | 3.973  | 5.126  | 5.473  | 5.139  | 4.935  | 4.933  | 5.045  | 6.692  | 6.860  | 109934 | ABR      | NM_198894_11_-1 |
| Abr            | -2.161 | -1.639 | -1.463 | -1.438 | 2.404  | 4.631  | 0.669  | 0.979  | 0.305  | 0.309  | 109934 | ABR      | NM_198895_11_-1 |
| Uggt1          | 7.120  | 7.065  | 7.182  | 7.130  | 6.874  | 6.891  | 6.721  | 6.784  | 7.174  | 7.465  | 320011 | UGGT1    | NM_198899_1_-1  |
| Ppm1m          | 1.135  | 2.169  | 1.796  | 2.523  | 0.724  | -0.116 | -1.699 | 0.172  | -0.429 | 0.629  | 67905  | PPM1M    | NM_198931_9_-1  |
| Pou2f1         | 1.814  | 2.348  | 2.805  | 2.527  | 3.527  | 2.778  | 2.987  | 2.723  | 3.187  | 3.031  | 18986  | POU2F1   | NM_198932_1_-1  |
| Pou2f1         | 2.453  | 1.257  | 0.700  | 1.406  | -0.887 | 1.203  | 1.092  | 1.484  | 0.709  | 0.314  | 18986  | POU2F1   | NM_198933_1_-1  |
| Pou2f1         | 1.182  | 1.970  | -0.682 | -0.078 | -1.342 | 0.407  | -1.588 | 0.596  | 0.293  | -0.770 | 18986  | POU2F1   | NM_198934_1_-1  |
| Slu7           | 5.571  | 5.641  | 5.755  | 5.723  | 5.668  | 5.635  | 5.811  | 5.595  | 5.889  | 5.854  | 193116 | SLU7     | NM_198936_11_+1 |
| Hn1l           | 4.295  | 4.560  | 6.426  | 6.605  | 5.273  | 5.426  | 5.135  | 5.744  | 4.426  | 4.923  | 52009  | HN1L     | NM_198937_17_-1 |
| Dhx57          | -0.529 | -0.282 | -0.425 | -0.892 | -0.967 | -0.200 | 0.925  | -1.785 | -2.953 | 0.668  | 106794 | DHX57    | NM_198942_17_-1 |
| Rbm12b2        | 2.416  | 3.168  | 3.214  | 3.152  | 3.066  | 2.935  | 3.125  | 3.144  | 3.359  | 3.819  | 77604  | RBM12B   | NM_198957_4_+1  |
| Tmtc1          | 0.571  | 0.125  | 1.302  | -0.137 | -3.818 | -2.247 | -2.732 | -1.309 | -4.981 | -4.981 | 387314 | TMTC1    | NM_198967_6_-1  |
| Sgol2a         | 0.640  | -0.246 | 1.935  | 1.879  | 2.921  | 2.315  | 2.054  | 1.071  | 0.092  | -0.908 | 68549  | SGO2     | NM_199007_1_+1  |
| Cox11          | 4.682  | 4.631  | 3.803  | 4.006  | 4.158  | 4.128  | 4.130  | 3.945  | 3.339  | 3.618  | 69802  | COX11    | NM_199008_11_+1 |
| Fam160a2       | -4.388 | -1.768 | 1.769  | 2.451  | -4.286 | -2.808 | 0.594  | 1.691  | 4.207  | 2.804  | 74349  | FAM160A2 | NM_199009_7_-1  |
| Dgkq           | 1.922  | 2.304  | 2.573  | 2.265  | 2.898  | 2.836  | 2.789  | 2.413  | 3.997  | 4.044  | 110524 | DGKQ     | NM_199011_5_-1  |
| Fchsd2         | -3.934 | -3.639 | -0.719 | 0.125  | -1.115 | -2.081 | -4.389 | -4.795 | -4.072 | -1.825 | 207278 | FCHSD2   | NM_199012_7_+1  |
| Irgc1          | 0.843  | 2.402  | -4.751 | -3.043 | -0.695 | 1.618  | -0.282 | 0.716  | 1.475  | 1.937  | 210145 | IRGC     | NM_199013_7_-1  |
| Phf11d         | 2.274  | 1.787  | 5.039  | 4.718  | 5.433  | 4.503  | 5.844  | 4.747  | 5.405  | 3.956  | 219132 | PHF11    | NM_199015_14_-1 |
| Enpp4          | 5.993  | 5.672  | 6.643  | 6.386  | 3.289  | 4.049  | 3.948  | 4.210  | 2.171  | 1.230  | 224794 | ENPP4    | NM_199016_17_-1 |
| 9230110C19Rik  | -2.013 | -0.003 | -2.822 | -3.370 | -4.966 | -3.645 | -4.962 | -4.730 | -4.981 | -4.227 | 234912 | C11orf70 | NM_199017_9_-1  |
| Stard8         | 2.240  | 1.859  | 2.455  | 2.206  | -0.772 | -1.562 | 3.283  | 3.971  | 5.925  | 6.023  | 236920 | STARD8   | NM_199018_X_+1  |
| Sppl2c         | -4.981 | -4.981 | -4.981 | -4.981 | -4.981 | -4.981 | -4.977 | -4.460 | -4.981 | -4.981 | 237958 | SPPL2C   | NM_199019_11_+1 |
| Dpp10          | -4.981 | -2.895 | -1.805 | -0.905 | 3.240  | 2.696  | 1.755  | 0.733  | -2.119 | -3.098 | 269109 | DPP10    | NM_199021_1_-1  |
| Shc4           | -3.668 | -0.576 | -1.711 | -2.091 | -4.680 | -3.159 | -4.812 | -3.246 | -1.903 | -1.310 | 271849 | SHC4     | NM_199022_2_-1  |
| Zbtb26         | 1.863  | 1.629  | 2.123  | 1.394  | 2.108  | 1.980  | 2.214  | 1.791  | 1.593  | 1.655  | 320633 | ZBTB26   | NM_199025_2_-1  |
| Zfp335         | 3.787  | 3.600  | 3.767  | 3.859  | 4.573  | 4.420  | 4.237  | 4.051  | 4.918  | 5.046  | 329559 | ZNF335   | NM_199027_2_-1  |
| Bend3          | 1.008  | 0.910  | 1.020  | 1.548  | 1.393  | 0.669  | 0.581  | 0.755  | 1.296  | 1.676  | 331623 | BEND3    | NM_199028_10_+1 |

|               |        |        |        |        |        |        |        |        |        |        |        |           |                       |
|---------------|--------|--------|--------|--------|--------|--------|--------|--------|--------|--------|--------|-----------|-----------------------|
| Zfp395        | 2.001  | 1.542  | 1.833  | 2.379  | 0.172  | 0.428  | 0.855  | 1.767  | 0.951  | 1.672  | 380912 | ZNF395    | NM_199029_14_+_1      |
| Cep135        | 3.589  | 3.655  | 3.677  | 3.706  | 3.953  | 3.883  | 3.343  | 3.493  | 3.384  | 4.030  | 381644 | CEP135    | NM_199032_5_+_1       |
| Tsen2         | 3.576  | 3.906  | 2.303  | 2.557  | 2.543  | 2.805  | 1.796  | 2.403  | 1.268  | 1.514  | 381802 | TSEN2     | NM_199033_6_+_1       |
| 4922502D21Rik | -0.995 | 0.193  | -4.966 | -4.966 | -4.027 | -4.975 | -2.370 | -4.832 | -4.981 | -4.981 | 381816 | NA        | NM_199034_6_-_1       |
| Alg8          | 5.054  | 4.523  | 5.371  | 4.304  | 5.111  | 4.002  | 4.875  | 3.805  | 3.813  | 2.945  | 381903 | ALG8      | NM_199035_7_+_1       |
| Casc4         | 0.906  | 2.135  | 0.448  | 1.258  | 0.091  | 1.876  | -1.499 | 0.894  | -0.896 | -4.295 | 319996 | CASC4     | NM_199038_2_+_1       |
| Thap1         | 3.017  | 2.979  | 2.995  | 3.002  | 2.600  | 2.571  | 2.708  | 2.760  | 3.046  | 2.793  | 73754  | THAP1     | NM_199042_8_+_1       |
| Chst9         | -4.981 | -4.981 | -2.514 | -3.585 | -4.981 | -4.981 | -4.981 | -4.981 | -4.981 | -4.981 | 71367  | CHST9     | NM_199055_18_-_1      |
| Ippk          | 1.659  | 2.165  | 2.765  | 2.540  | 2.554  | 2.328  | 1.960  | 2.255  | 2.694  | 2.659  | 75678  | IPPK      | NM_199056_13_+_1      |
| Rusc2         | -4.981 | -1.757 | -2.264 | -2.486 | -3.120 | -4.373 | -2.288 | -4.950 | 2.058  | -0.390 | 100213 | RUSC2     | NM_199057_4_+_1       |
| AF067061      | 0.643  | -0.791 | -1.432 | -1.800 | -4.487 | -2.693 | -3.829 | -0.772 | -4.981 | -2.539 | 236546 | NA        | NM_199060_13_+_1      |
| Zfp781        | -0.869 | 1.870  | -1.599 | 0.942  | 0.850  | 2.249  | 0.232  | 0.708  | 0.181  | 2.007  | 331188 | NA        | NM_199062_10_-_2      |
| Zfp781        | 0.692  | -4.981 | 0.393  | -1.316 | 1.257  | -2.185 | 0.917  | -1.993 | -0.200 | -1.144 | 331188 | NA        | NM_199062_dup1_10_-_1 |
| Foxk1         | 3.081  | 2.722  | 3.125  | 2.997  | 3.725  | 3.415  | 3.879  | 3.604  | 4.087  | 4.016  | 17425  | FOXK1     | NM_199068_5_+_1       |
| Ddx17         | -0.002 | 0.632  | 1.566  | 1.070  | 0.758  | 0.314  | 0.421  | 0.094  | 0.760  | 1.485  | 67040  | DDX17     | NM_199079_15_-_1      |
| Ddx17         | 4.808  | 5.103  | 4.974  | 4.439  | 4.710  | 4.443  | 4.358  | 4.560  | 2.977  | 4.131  | 67040  | DDX17     | NM_199080_15_-_1      |
| Znrf2         | 6.127  | 5.986  | 6.436  | 6.097  | 6.659  | 6.560  | 6.350  | 6.147  | 6.536  | 6.695  | 387524 | NMNF2     | NM_199143_6_+_1       |
| 3110062M04Rik | 5.349  | 4.859  | 4.681  | 4.424  | 4.666  | 4.566  | 4.287  | 4.120  | 3.285  | 3.182  | 78412  | C7orf49   | NM_199145_6_-_1       |
| Trim30d       | 6.280  | 6.097  | 5.305  | 4.572  | 4.793  | 3.866  | 4.929  | 3.815  | 4.902  | 4.250  | 209387 | NA        | NM_199146_7_-_1       |
| Ppp1r37       | 1.523  | 1.886  | 1.329  | 1.768  | 2.033  | 1.329  | 1.766  | 1.495  | 3.087  | 3.050  | 232947 | PPP1R37   | NM_199149_7_-_1       |
| BC049730      | -4.981 | -4.981 | -4.925 | -4.274 | -4.981 | -4.582 | -4.977 | -4.229 | -4.981 | 0.939  | 232972 | NA        | NM_199150_7_+_1       |
| Obscn         | 4.449  | 2.985  | -3.252 | -4.603 | -4.084 | -4.712 | -4.981 | -4.981 | -3.625 | -4.981 | 380698 | OBSCN     | NM_199152_11_-_1      |
| Ifnk          | -4.981 | -4.981 | -4.845 | -4.320 | -4.923 | -4.586 | -3.118 | -2.737 | -3.351 | -1.054 | 387510 | IFNK      | NM_199157_4_+_1       |
| Tas2r135      | -1.949 | -4.981 | -4.981 | -4.981 | -4.964 | -4.866 | -4.955 | -4.968 | -2.936 | -4.981 | 387512 | TAS2R60   | NM_199159_6_+_1       |
| Bckdhhb       | 2.833  | -2.455 | 0.274  | -2.444 | 1.383  | -4.300 | 1.390  | -2.403 | -1.874 | -4.790 | 12040  | BCKDHB    | NM_199195_9_+_1       |
| Suz12         | 3.835  | 3.942  | 4.524  | 4.460  | 4.882  | 4.669  | 4.654  | 4.564  | 4.279  | 4.817  | 52615  | SUZ12     | NM_199196_11_+_1      |
| Rbfa          | 6.620  | 6.794  | 5.786  | 5.623  | 5.556  | 5.573  | 6.090  | 6.005  | 6.411  | 6.022  | 68731  | RBFA      | NM_199197_18_-_1      |
| Hdac10        | 4.457  | 4.073  | 2.904  | 2.684  | 3.928  | 3.892  | 3.404  | 2.720  | 3.336  | 2.742  | 170787 | HDAC10    | NM_199198_15_-_1      |
| Tmem199       | 6.018  | 5.740  | 5.399  | 5.344  | 5.541  | 5.463  | 5.206  | 5.055  | 4.550  | 4.371  | 195040 | TMEM199   | NM_199199_11_-_1      |
| Fam171a2      | 1.383  | 2.207  | -1.779 | -2.661 | -3.705 | -3.353 | -4.789 | -4.777 | -4.981 | -3.758 | 217219 | FAM171A2  | NM_199200_11_-_1      |
| Cd300ld3      | -4.981 | -0.318 | -4.305 | -3.970 | -3.622 | -2.417 | -3.833 | -0.763 | -4.619 | -4.920 | 382551 | CD300LD   | NM_199201_11_-_1      |
| Cd300ld3      | -4.981 | -4.350 | -4.259 | -3.991 | -3.717 | -2.835 | 1.183  | 1.492  | -0.692 | -0.542 | 382551 | CD300LD   | NM_199201_dup1_11_-_1 |
| Cd300lb       | -1.818 | -4.981 | 0.927  | -0.228 | 2.628  | 2.801  | 6.119  | 6.448  | 8.424  | 8.400  | 217304 | CD300LB   | NM_199221_11_-_1      |
| Lman1l        | -4.981 | -4.981 | -4.977 | -4.426 | -4.027 | -4.994 | -4.981 | -4.981 | -4.981 | -4.981 | 235416 | LMAN1L    | NM_199222_9_-_1       |
| Cd300c        | 7.464  | 4.146  | 2.837  | 0.169  | -0.602 | -2.669 | 0.173  | -2.968 | -3.043 | -4.227 | 387565 | CD300C    | NM_199225_11_-_1      |
| Sema6d        | 1.022  | -4.760 | 1.991  | 2.457  | 1.402  | 2.061  | -0.056 | 1.188  | -3.334 | -2.113 | 214968 | SEMA6D    | NM_199238_2_+_1       |
| Sema6d        | -2.091 | -1.113 | 0.558  | 0.132  | -0.545 | -0.441 | 0.071  | -1.045 | -1.229 | -2.599 | 214968 | SEMA6D    | NM_199239_2_+_1       |
| Sema6d        | -3.772 | -3.110 | -0.703 | -0.452 | -0.130 | -1.120 | -0.205 | -0.022 | -2.372 | -1.710 | 214968 | SEMA6D    | NM_199240_2_+_1       |
| Sema6d        | -4.063 | -3.770 | -2.614 | -0.400 | -3.364 | -4.066 | -2.718 | -4.417 | -3.747 | -3.717 | 214968 | SEMA6D    | NM_199241_2_+_1       |
| Kcnk12        | -3.349 | -4.981 | 0.886  | 0.877  | -1.068 | 2.235  | -0.663 | 1.204  | 0.890  | 2.540  | 210741 | KCNK12    | NM_199251_17_-_1      |
| Unc93a        | -4.981 | -4.981 | -4.944 | -4.611 | -4.917 | -3.158 | -4.943 | -3.755 | -4.981 | -4.981 | 381058 | UNC93A    | NM_199252_17_-_1      |
| Jade2         | 3.860  | 3.641  | 2.937  | 2.931  | 3.997  | 4.046  | 3.483  | 2.701  | 0.148  | -1.548 | 76901  | JADE2     | NM_199299_11_-_1      |
| Mtg1          | 4.916  | 5.281  | 4.162  | 4.673  | 4.436  | 4.923  | 3.900  | 4.424  | 4.043  | 3.877  | 212508 | MTG1      | NM_199301_7_+_1       |
| Lrsam1        | 2.430  | 3.186  | 2.261  | 2.537  | 2.202  | 2.568  | 2.154  | 2.236  | 2.689  | 2.754  | 227738 | LRSAM1    | NM_199302_2_-_1       |
| Zfp341        | 1.274  | 1.182  | 0.412  | -0.104 | 0.786  | 0.614  | 0.681  | -0.533 | 0.341  | -0.135 | 228807 | ZNF341    | NM_199304_2_+_1       |
| Tmem39b       | 2.948  | 2.078  | 2.978  | 2.659  | 3.469  | 2.913  | 3.263  | 2.965  | 3.667  | 3.401  | 230770 | TMEM39B   | NM_199305_4_-_1       |
| Wdtdc1        | 1.357  | 1.914  | 1.168  | 0.494  | 1.258  | 0.814  | 1.306  | 1.151  | 2.050  | 2.130  | 230796 | WDTC1     | NM_199306_4_-_1       |
| Ece1          | 3.142  | 3.247  | 8.238  | 8.470  | 5.639  | 5.864  | 5.757  | 6.198  | 4.909  | 5.046  | 230857 | ECE1      | NM_199307_4_+_1       |
| Mast3         | 4.743  | 4.377  | 5.085  | 4.859  | 5.728  | 5.394  | 5.645  | 5.472  | 6.177  | 5.821  | 546071 | MAST3     | NM_199308_8_-_1       |
| Ccdc32        | 5.714  | 5.560  | 4.100  | 3.853  | 3.886  | 3.920  | 4.170  | 4.145  | 4.390  | 4.458  | 269336 | C15orf57  | NM_199310_2_-_1       |
| Clec4a1       | 0.421  | -1.243 | 0.421  | 0.461  | 6.052  | 5.681  | 7.038  | 6.925  | 7.641  | 7.912  | 269799 | ZNF705A   | NM_199311_6_+_1       |
| BC051628      | 0.245  | 0.183  | -4.765 | -3.321 | -0.257 | 0.208  | -3.315 | -2.952 | -4.981 | -3.758 | 332713 | FNDC11    | NM_199312_2_+_1       |
| Serpina11     | -4.981 | -4.981 | -4.974 | -4.941 | -4.128 | -4.594 | -4.167 | -4.599 | -4.622 | -4.981 | 380780 | SERPINA11 | NM_199314_12_+_1      |
| Cep162        | 3.293  | 3.631  | 3.440  | 3.708  | 4.573  | 4.640  | 3.926  | 3.789  | 2.856  | 3.441  | 382090 | CEP162    | NM_199316_9_-_1       |
| Jade3         | 1.808  | 2.111  | 1.189  | 1.057  | 1.479  | 1.073  | 0.764  | 1.049  | 1.657  | 2.066  | 382207 | JADE3     | NM_199317_X_+_1       |
| Ssxb5         | -4.981 | -4.981 | -4.946 | -4.973 | -4.974 | -4.979 | -4.969 | -4.979 | -4.976 | -4.981 | 387586 | NA        | NM_199319_X_+_1       |
| Dot1l         | 1.845  | 2.816  | 2.722  | 2.761  | 3.251  | 2.914  | 2.848  | 2.758  | 3.590  | 3.642  | 208266 | DOT1L     | NM_199322_10_+_1      |
| Tacc1         | 5.715  | 6.074  | 5.599  | 5.481  | 5.802  | 6.083  | 6.219  | 6.144  | 6.390  | 6.695  | 320165 | TACC1     | NM_199323_8_-_1       |
| Lzts1         | -3.349 | -2.895 | -4.962 | -4.592 | -2.380 | -4.126 | -3.725 | -4.981 | -4.981 | -4.981 | 211134 | LZTS1     | NM_199364_8_-_1       |
| Gal3st2       | -1.083 | -2.456 | 1.601  | -0.166 | 1.368  | -1.236 | 0.876  | -2.763 | -4.981 | -3.509 | 381334 | GAL3ST2   | NM_199366_1_+_1       |
| Zbp2          | 1.121  | 1.176  | -3.119 | -3.891 | -3.082 | -3.972 | -1.767 | -2.992 | -2.982 | -2.072 | 69376  | ZBP2      | NM_199419_11_+_1      |
| S100a7a       | -4.981 | -4.981 | -4.911 | -4.535 | -4.354 | -3.611 | -3.702 | -4.970 | -4.981 | -4.981 | 381493 | NA        | NM_199422_3_+_1       |
| Phkb          | 5.715  | 5.915  | 5.614  | 5.621  | 5.051  | 5.304  | 4.677  | 4.689  | 3.986  | 4.615  | 102093 | PHKB      | NM_199446_8_+_1       |
| Rrp12         | 2.094  | 1.745  | 2.572  | 2.976  | 3.091  | 2.520  | 3.030  | 2.761  | 3.812  | 2.988  | 107094 | RRP12     | NM_199447_19_-_1      |
| Fez2          | 3.813  | 4.258  | 3.989  | 4.265  | 3.978  | 4.079  | 4.493  | 4.829  | 5.163  | 5.083  | 225020 | FEZ2      | NM_199448_17_-_1      |
| Zhx2          | -0.202 | -0.637 | 0.464  | 0.364  | 1.558  | 1.399  | 1.103  | 1.075  | 1.267  | 1.530  | 387609 | ZHX2      | NM_199449_15_+_1      |
| Nexn          | -4.981 | -4.981 | -4.989 | -4.613 | -4.790 | -4.368 | -4.451 | -4.666 | -4.394 | -4.981 | 68810  | NEXN      | NM_199465_3_-_1       |
| Eml4          | -3.894 | -4.394 | -3.110 | -4.863 | -1.697 | -4.564 | -0.233 | -3.195 | -0.869 | 1.474  | 78798  | EML4      | NM_199466_17_+_1      |
| Mms22l        | 2.820  | 2.750  | 3.541  | 3.440  | 3.874  | 3.681  | 3.008  | 3.068  | 2.249  | 2.082  | 212377 | MMS22L    | NM_199467_4_+_1       |
| Nploc4        | -2.105 | -2.301 | 1.122  | 0.587  | 0.851  | -0.623 | 0.750  | -3.939 | -3.823 | -0.973 | 217365 | NPLOC4    | NM_199469_11_-_1      |
| Cdh24         | -1.491 | -1.747 | -1.286 | -3.445 | -2.381 | -3.078 | -3.722 | -2.783 | -2.720 | -3.498 | 239096 | CDH24     | NM_199470_14_-_1      |
| Fam63a        | 3.321  | 3.250  | 2.234  | 2.207  | 1.821  | 1.932  | 3.066  | 3.533  | 5.498  | 5.154  | 75007  | FAM63A    | NM_199475_3_+_1       |
| Rrm2b         | 4.674  | 4.600  | 3.790  | 3.235  | 4.313  | 4.376  | 4.131  | 3.703  | 3.359  | 3.828  | 382985 | RRM2B     | NM_199476_15_-_1      |
| Lrrc47        | 4.935  | 4.730  | 4.861  | 4.989  | 4.842  | 4.608  | 4.679  | 4.780  | 5.528  | 5.352  | 72946  | LRRC47    | NM_201226_4_+_1       |

|              |        |        |        |        |        |        |        |        |        |        |        |                |                 |
|--------------|--------|--------|--------|--------|--------|--------|--------|--------|--------|--------|--------|----------------|-----------------|
| Dand5        | -4.981 | -4.981 | -4.981 | -4.981 | -4.973 | -4.821 | -4.981 | -4.981 | -2.023 | -4.981 | 23863  | DAND5          | NM_201227_8_-1  |
| Fgfr10p      | 6.632  | 6.722  | 4.734  | 4.969  | 5.252  | 5.133  | 4.673  | 4.331  | 4.290  | 4.399  | 75296  | FGFR10P        | NM_201230_17_+1 |
| Nipbl        | 5.518  | 5.882  | 5.149  | 5.129  | 5.796  | 5.530  | 5.565  | 5.330  | 4.972  | 5.339  | 71175  | NIPBL          | NM_201232_15_-1 |
| Rnase4       | -1.894 | -2.197 | -4.106 | -4.270 | -4.898 | -4.906 | -1.449 | -4.206 | 1.876  | 1.292  | 58809  | RNASE4         | NM_201239_14_+1 |
| Lims1        | 3.465  | 3.988  | 8.196  | 8.182  | 6.789  | 7.481  | 5.719  | 5.499  | 4.952  | 5.345  | 110829 | LIMS1          | NM_201242_10_+1 |
| Copg1        | 1.318  | 2.032  | 1.254  | 1.582  | 1.649  | 1.304  | 1.426  | 1.601  | 1.351  | 1.194  | 54161  | COPG1          | NM_201244_6_+1  |
| Mprlp        | 4.251  | 4.101  | 5.943  | 5.908  | 4.997  | 4.957  | 5.596  | 5.469  | 6.146  | 6.057  | 26936  | MPRIP          | NM_201245_11_+1 |
| Eif4ebp3     | 2.790  | 2.769  | 3.039  | 2.553  | 2.770  | 2.575  | 2.823  | 2.233  | 1.923  | 1.897  | 108112 | EIF4EBP3       | NM_201256_18_+1 |
| Cyb561a3     | 8.744  | 8.890  | 7.044  | 7.404  | 7.348  | 7.713  | 6.185  | 6.448  | 4.792  | 4.956  | 225912 | CYB561A3       | NM_201351_19_+1 |
| Gdpd5        | -0.897 | 0.140  | 4.760  | 4.748  | 2.662  | 2.257  | 1.448  | 2.716  | 2.175  | 1.789  | 233552 | GDPD5          | NM_201352_7_+1  |
| Slc6a7       | -4.981 | -4.981 | -4.951 | -3.557 | -4.937 | -1.764 | -4.983 | -3.411 | -4.981 | -4.981 | 240332 | SLC6A7         | NM_201353_18_-1 |
| Ctif         | 1.386  | 1.770  | 0.157  | 0.196  | -0.764 | -2.000 | -0.381 | -0.719 | 0.334  | 0.885  | 269037 | CTIF           | NM_201354_18_-1 |
| Nat14        | -2.025 | -0.838 | -2.058 | -3.837 | -4.340 | -2.441 | -3.220 | -4.277 | -1.563 | -2.003 | 269854 | NAT14          | NM_201355_7_+1  |
| Tssc1        | 5.305  | 5.595  | 4.888  | 5.083  | 4.968  | 5.026  | 4.856  | 4.757  | 4.404  | 4.285  | 380752 | TSSC1          | NM_201357_12_+1 |
| Lym4         | 5.226  | 5.145  | 2.902  | 3.043  | 2.817  | 3.212  | 2.484  | 2.926  | 2.442  | 2.204  | 380840 | LYRM4          | NM_201358_13_-1 |
| Tmem106c     | 3.619  | 3.857  | 1.095  | 2.472  | 0.629  | 1.462  | 1.229  | 1.906  | -0.034 | 1.709  | 380967 | TMEM106C       | NM_201359_15_+1 |
| Rmdn2        | 1.197  | 1.755  | 1.521  | 1.828  | 0.414  | 0.301  | 0.886  | 0.341  | -0.075 | 0.695  | 381110 | RMDN2          | NM_201361_17_+1 |
| Ccdc68       | -2.727 | -1.224 | -3.944 | -3.049 | -3.374 | -3.286 | -4.674 | -2.712 | -4.981 | -3.167 | 381175 | CCDC68         | NM_201362_18_+1 |
| BC055324     | 0.340  | 0.980  | 1.510  | 1.290  | 2.042  | 1.268  | 1.480  | 0.578  | 0.716  | -1.064 | 381306 | C1orf112       | NM_201364_1_-1  |
| Fam178b      | -0.590 | -0.316 | -4.981 | -4.981 | -3.512 | -4.966 | -4.968 | -4.734 | -4.981 | -4.981 | 381337 | FAM178B        | NM_201365_1_-1  |
| Gpr176       | -2.273 | -4.981 | 1.281  | 0.438  | -4.344 | -4.984 | -4.363 | -3.136 | -4.981 | -2.391 | 381413 | GPR176         | NM_201367_2_-1  |
| Xkr8         | 1.961  | 1.815  | 0.888  | 1.277  | 0.552  | 0.790  | 1.324  | 0.719  | 2.596  | 2.478  | 381560 | XKR8           | NM_201368_4_-1  |
| N4bp2l2      | 6.582  | 6.574  | 5.868  | 5.748  | 6.145  | 6.195  | 5.944  | 5.615  | 4.985  | 5.264  | 381695 | N4BP2L2        | NM_201369_5_-1  |
| Ccdc84       | 3.851  | 3.983  | 3.566  | 3.367  | 3.417  | 3.428  | 3.193  | 3.172  | 2.999  | 3.091  | 382073 | CCDC84         | NM_201372_9_-1  |
| Trim56       | 2.717  | 1.410  | 2.513  | 2.299  | 2.768  | 3.028  | 2.805  | 2.202  | 2.448  | 2.030  | 384309 | TRIM56         | NM_201373_5_-1  |
| Ccdc155      | -1.373 | -3.408 | -2.651 | -2.817 | -1.084 | -2.399 | -2.226 | -4.116 | -4.190 | -3.758 | 384619 | CCDC155        | NM_201374_7_-1  |
| Plec         | -4.276 | 1.794  | -0.505 | -1.301 | -1.387 | -0.539 | 1.150  | -0.347 | 2.652  | 2.082  | 18810  | PLEC           | NM_201385_15_-1 |
| Plec         | -4.323 | -4.034 | -4.428 | -4.793 | -4.738 | -3.536 | -4.552 | -3.470 | -0.707 | -0.988 | 18810  | PLEC           | NM_201386_15_-1 |
| Plec         | -4.345 | -4.060 | -4.453 | -4.804 | -4.769 | -4.960 | -4.637 | -4.899 | -3.583 | -4.143 | 18810  | PLEC           | NM_201387_15_-1 |
| Plec         | -4.328 | -4.024 | -4.423 | -4.788 | -4.749 | -4.959 | -4.602 | -4.878 | -3.489 | -4.068 | 18810  | PLEC           | NM_201388_15_-1 |
| Plec         | -4.594 | -4.368 | -4.602 | -4.904 | -3.851 | -4.961 | -0.539 | 1.190  | 4.094  | 3.481  | 18810  | PLEC           | NM_201389_15_-1 |
| Plec         | -4.285 | -3.968 | -4.356 | -4.765 | -4.699 | -4.955 | -4.531 | -4.839 | -3.101 | -3.940 | 18810  | PLEC           | NM_201390_15_-1 |
| Plec         | 0.753  | -0.149 | -3.223 | -2.387 | -4.776 | -3.281 | 0.677  | 0.141  | 1.225  | 2.530  | 18810  | PLEC           | NM_201391_15_-1 |
| Plec         | -4.267 | -3.953 | -4.324 | -4.750 | -4.668 | -4.951 | -4.491 | -4.817 | -2.853 | -3.693 | 18810  | PLEC           | NM_201392_15_-1 |
| Plec         | 2.829  | 2.918  | -2.475 | -1.644 | -0.808 | -0.637 | 0.979  | 1.578  | 3.877  | 3.978  | 18810  | PLEC           | NM_201393_15_-1 |
| Plec         | 3.554  | 3.424  | 0.882  | 1.796  | 1.986  | 2.445  | 3.745  | 4.366  | 6.740  | 6.315  | 18810  | PLEC           | NM_201394_15_-1 |
| Pigs         | 5.991  | 6.124  | 5.875  | 6.181  | 5.863  | 5.954  | 6.023  | 6.171  | 6.667  | 6.357  | 276846 | PIGS           | NM_201406_11_+1 |
| Dennd4b      | 5.497  | 5.757  | 6.112  | 5.954  | 6.512  | 6.380  | 5.934  | 5.706  | 6.096  | 5.929  | 229541 | DENND4B        | NM_201407_3_+1  |
| Ugt1a6b      | -4.748 | 1.334  | -1.006 | 3.431  | -2.853 | 2.118  | -4.336 | 3.121  | 1.492  | 5.194  | 394435 | UGT1A6         | NM_201410_1_+1  |
| Flrt1        | -3.668 | -4.981 | -4.411 | -4.255 | -4.362 | -4.946 | -4.919 | -4.575 | -4.981 | -4.981 | 396184 | FLRT1          | NM_201411_19_-1 |
| Flrt2        | -0.676 | -4.981 | -3.727 | -3.449 | -3.652 | -2.783 | -4.945 | -4.909 | -2.598 | -4.981 | 399558 | FLRT2          | NM_201518_12_+1 |
| Map4k5       | 4.818  | 4.716  | 5.607  | 5.054  | 3.776  | 3.630  | 3.934  | 3.991  | 4.125  | 4.442  | 399510 | MAP4K5         | NM_201519_12_-1 |
| Lmo7         | -4.981 | -4.981 | -3.586 | -3.600 | -2.758 | -2.205 | -3.236 | -2.616 | -4.981 | -3.210 | 380928 | LMO7           | NM_201529_14_+1 |
| Myo5b        | 1.268  | 2.294  | -3.803 | -2.029 | -0.922 | 1.932  | -3.266 | -1.112 | -1.927 | -3.498 | 17919  | MYO5B          | NM_201600_18_+1 |
| Pde4c        | -3.985 | -2.170 | -1.755 | -0.634 | -3.265 | -2.415 | -2.566 | -4.009 | -2.151 | -4.447 | 110385 | PDE4C          | NM_201607_8_+1  |
| Zfp652       | 2.598  | 2.622  | 3.987  | 4.017  | 3.748  | 3.476  | 3.452  | 3.312  | 3.542  | 3.622  | 268469 | ZNF652         | NM_201609_11_+1 |
| Neil2        | -1.777 | -0.688 | -2.301 | -2.143 | -1.711 | -2.095 | -3.729 | -4.045 | -2.329 | -2.562 | 382913 | NEIL2          | NM_201610_14_-1 |
| Gnas         | 6.436  | 6.253  | 5.902  | 6.244  | 5.669  | 5.442  | 5.448  | 5.917  | 6.392  | 6.176  | 14683  | GNAS           | NM_201616_2_+1  |
| Gnas         | -2.548 | -4.981 | -4.848 | -4.874 | -4.903 | -4.954 | -4.981 | -4.918 | -4.981 | -4.981 | 14683  | GNAS           | NM_201618_2_+1  |
| Chd8         | 4.153  | 4.039  | 4.828  | 4.665  | 5.319  | 5.056  | 4.776  | 4.447  | 4.433  | 4.067  | 67772  | CHD8           | NM_201637_14_-1 |
| Mettl14      | 4.097  | 3.923  | 3.920  | 3.994  | 3.941  | 3.824  | 4.000  | 3.818  | 3.850  | 3.926  | 210529 | METTL14        | NM_201638_3_-1  |
| Ugt1a10      | -4.981 | -4.981 | -4.863 | -4.289 | -4.966 | -4.715 | -4.981 | -4.981 | -2.918 | -2.560 | 394430 | UGT1A10 UGT1A7 | NM_201641_1_+1  |
| Ugt1a7c      | 4.645  | 2.854  | 6.234  | 6.577  | 5.047  | 4.677  | 6.297  | 6.635  | 8.861  | 8.733  | 394432 | NA             | NM_201642_1_+1  |
| Ugt1a5       | -4.981 | -4.981 | -4.883 | -4.171 | -3.305 | -4.562 | -4.943 | -4.031 | -4.981 | -3.352 | 394433 | UGT1A4         | NM_201643_1_+1  |
| Ugt1a9       | -4.981 | -4.981 | -4.916 | -1.022 | -4.954 | -1.635 | -4.924 | -0.924 | -4.981 | 1.711  | 394434 | UGT1A10 UGT1A7 | NM_201644_1_+1  |
| Ugt1a1       | -4.981 | -4.981 | -2.018 | -1.270 | -3.393 | -3.711 | -1.256 | -1.391 | -0.143 | 1.207  | 394436 | UGT1A1         | NM_201645_1_+1  |
| Btbd6        | 1.128  | -0.238 | 0.780  | 1.506  | 0.782  | 1.478  | 1.427  | 0.702  | 1.629  | 1.914  | 399566 | BTBD6          | NM_201646_12_+1 |
| Sphk2        | 3.699  | 3.573  | 4.352  | 4.517  | 4.094  | 4.158  | 4.046  | 3.947  | 5.581  | 5.245  | 56632  | SPHK2          | NM_203280_7_-1  |
| Dhx37        | 3.061  | 3.123  | 3.359  | 2.440  | 3.265  | 2.942  | 3.079  | 2.192  | 3.305  | 2.702  | 208144 | DHX37          | NM_203319_5_-1  |
| Cxcl3        | -4.981 | -4.981 | -5.012 | -1.312 | -4.980 | -4.946 | -4.841 | -3.777 | -4.244 | -3.381 | 330122 | NA             | NM_203320_5_+1  |
| Ltk          | -4.981 | -4.981 | -4.981 | -4.979 | -4.981 | -4.981 | -4.981 | -4.975 | -4.981 | -4.981 | 17005  | LTK            | NM_203345_2_-1  |
| Mrgprd       | -4.981 | -4.981 | -1.944 | -4.404 | -4.981 | -4.981 | -4.981 | -4.981 | -4.981 | -4.981 | 211578 | MRGPRD         | NM_203490_7_+1  |
| Rwdd4a       | 4.935  | 4.971  | 4.494  | 4.744  | 4.511  | 4.487  | 4.285  | 4.305  | 3.843  | 4.152  | 192174 | RWDD4          | NM_203507_8_+1  |
| Tlr11        | -1.507 | -4.981 | 8.221  | 8.091  | 3.408  | 3.724  | 4.671  | 5.581  | 2.163  | 2.627  | 239081 | NA             | NM_205819_14_+1 |
| Tlr13        | -1.165 | -1.079 | 6.075  | 5.915  | 5.942  | 5.732  | 6.690  | 6.592  | 8.904  | 8.945  | 279572 | NA             | NM_205820_X_+1  |
| Tlr12        | 5.314  | 3.017  | 6.029  | 4.968  | 1.290  | 2.967  | 0.797  | 2.692  | -0.908 | -1.660 | 384059 | NA             | NM_205823_4_-1  |
| Churc1       | 8.030  | 8.059  | 7.349  | 7.139  | 7.210  | 7.354  | 6.895  | 6.738  | 5.590  | 5.434  | 211151 | CHURC1         | NM_206534_12_+1 |
| Cd200r2      | -2.075 | -4.981 | 0.274  | -3.897 | -3.913 | -4.941 | -4.858 | -4.685 | -4.981 | -4.981 | 271375 | CD200R1L       | NM_206535_16_+1 |
| AB124611     | 1.046  | 2.866  | 2.122  | 3.113  | 2.202  | 1.866  | 3.557  | 3.818  | 4.706  | 4.494  | 382062 | C19orf38       | NM_206536_9_+1  |
| Tacc2        | 2.401  | 2.370  | -2.984 | -3.372 | -1.511 | -0.931 | -2.508 | -2.293 | -0.119 | -0.321 | 57752  | TACC2          | NM_206856_7_+1  |
| Hist3h2bb-ps | -0.381 | -4.981 | -1.708 | -2.483 | -0.733 | -4.493 | -1.668 | -4.094 | -2.842 | -4.981 | 382522 | HIST3H2BB      | NM_206882_11_-1 |
| Jtb          | 8.084  | 7.957  | 7.085  | 6.980  | 6.473  | 6.575  | 6.349  | 6.550  | 6.141  | 6.156  | 23922  | JTB            | NM_206924_3_+1  |
| Ltk          | -4.981 | -4.655 | -4.865 | -4.908 | -4.900 | -4.962 | -4.971 | -4.969 | -4.981 | -4.981 | 17005  | LTK            | NM_206941_2_-1  |
| Ltk          | -4.981 | -4.981 | -4.962 | -4.542 | -4.981 | -4.981 | -4.978 | -3.880 | -4.981 | -4.981 | 17005  | LTK            | NM_206942_2_-1  |

|          |        |        |        |        |        |        |        |        |        |        |        |          |                       |
|----------|--------|--------|--------|--------|--------|--------|--------|--------|--------|--------|--------|----------|-----------------------|
| Ltbp1    | -4.981 | -4.981 | -3.732 | -0.230 | -3.271 | -3.897 | -1.819 | -2.430 | 0.031  | 1.245  | 268977 | LTBP1    | NM_206958_17_+_1      |
| Gpr152   | -4.981 | -4.981 | -0.959 | -0.539 | -2.814 | -2.441 | -1.017 | -2.124 | -1.984 | -2.969 | 269053 | GPR152   | NM_206973_19_+_1      |
| Kcnrg    | -4.353 | -3.376 | -2.741 | -3.530 | -4.417 | -4.913 | -4.073 | -4.629 | -1.716 | -1.452 | 328424 | KCNRG    | NM_206974_14_+_1      |
| H2afy2   | -2.948 | -4.981 | -1.153 | -0.193 | 1.285  | 2.635  | -0.377 | 0.156  | 0.067  | -0.758 | 404634 | H2AFY2   | NM_207000_10_-_1      |
| Tas2r126 | -1.884 | -0.729 | -4.387 | -4.657 | -4.899 | -4.023 | -3.448 | -4.378 | -3.750 | -4.227 | 387353 | TAS2R41  | NM_207028_6_+_1       |
| Ano7     | -4.981 | -4.981 | -0.602 | 1.001  | -3.411 | -0.886 | -4.580 | -4.910 | -2.177 | -4.844 | 404545 | ANO7     | NM_207031_1_+_1       |
| Haus7    | 2.233  | 2.170  | 1.378  | 1.371  | 1.352  | 1.367  | 0.066  | 1.151  | 0.998  | 0.287  | 73738  | HAUS7    | NM_207104_X_-_1       |
| H2-Ab1   | 12.906 | 12.926 | 13.501 | 13.646 | 13.899 | 13.841 | 13.852 | 13.893 | 7.786  | 7.731  | 14961  | HLA-DQB1 | NM_207105_17_+_1      |
| Rnf216   | 3.666  | 3.919  | 4.541  | 4.378  | 4.669  | 4.697  | 4.775  | 4.448  | 5.214  | 4.941  | 108086 | RNF216   | NM_207110_5_-_1       |
| Cebpe    | -4.981 | -4.981 | -5.009 | -4.398 | -4.965 | -2.407 | -4.461 | -1.988 | 2.334  | 1.807  | 110794 | CEBPE    | NM_207131_14_-_1      |
| Dnph1    | -3.668 | -0.317 | 2.864  | 1.936  | 1.925  | 1.234  | 1.793  | 1.173  | 0.285  | -0.760 | 381101 | DNPH1    | NM_207161_17_+_1      |
| Tes      | 5.280  | 5.692  | 6.884  | 7.040  | 7.709  | 7.367  | 6.895  | 6.222  | 4.331  | 4.699  | 21753  | TES      | NM_207176_6_+_1       |
| Ccdc120  | -0.274 | -0.436 | 1.141  | 1.341  | -1.664 | -1.684 | -2.137 | -3.361 | -4.981 | -4.981 | 54648  | CCDC120  | NM_207202_X_-_1       |
| Prr36    | -0.023 | -1.176 | -4.025 | -2.476 | -2.803 | -1.786 | -2.266 | -2.685 | -3.738 | -4.981 | 73072  | PRR36    | NM_207203_8_-_1       |
| Ninl     | -4.981 | -2.895 | -0.510 | -1.217 | -2.302 | -1.399 | -3.008 | -1.599 | -4.981 | -0.553 | 78177  | NINL     | NM_207204_2_-_1       |
| Igsf3    | -3.843 | -3.408 | -0.921 | 0.488  | 4.004  | 4.625  | 0.006  | -0.665 | -4.394 | -4.342 | 78908  | IGSF3    | NM_207205_3_+_1       |
| Lpcat4   | 0.011  | 0.197  | 4.825  | 5.198  | 4.242  | 4.314  | 5.002  | 5.155  | 5.749  | 5.084  | 99010  | LPCAT4   | NM_207206_2_+_1       |
| Mrps26   | 6.995  | 6.953  | 5.525  | 5.719  | 5.804  | 5.888  | 5.737  | 5.737  | 4.999  | 4.886  | 99045  | MRPS26   | NM_207207_2_+_1       |
| Sec24b   | 4.825  | 5.017  | 5.430  | 5.248  | 5.534  | 5.544  | 5.754  | 5.628  | 6.402  | 6.495  | 99683  | SEC24B   | NM_207209_3_-_1       |
| Dyrk4    | 0.211  | 0.661  | -0.301 | -0.237 | -1.769 | 0.601  | -2.014 | -2.121 | -4.981 | -2.290 | 101320 | DYRK4    | NM_207210_6_-_1       |
| Wtip     | -1.987 | -3.408 | -2.468 | -1.546 | -1.654 | -0.493 | -3.531 | -1.795 | -1.452 | -1.800 | 101543 | WTIP     | NM_207212_7_-_1       |
| Snx25    | 0.543  | 0.872  | 3.034  | 2.812  | 2.724  | 2.183  | 1.632  | 2.811  | 3.288  | 3.042  | 102141 | SNX25    | NM_207213_8_-_1       |
| Exoc5    | 4.795  | 4.855  | 5.564  | 5.604  | 5.311  | 5.166  | 5.618  | 5.419  | 6.167  | 6.499  | 105504 | EXOC5    | NM_207214_14_-_1      |
| Mycbp2   | 6.588  | 6.676  | 6.432  | 6.325  | 8.834  | 9.038  | 8.302  | 8.080  | 7.118  | 7.299  | 105689 | MYCBP2   | NM_207215_14_-_1      |
| Fam234a  | 2.591  | 2.855  | 3.886  | 3.143  | 4.075  | 3.058  | 5.292  | 4.394  | 6.450  | 5.521  | 106581 | FAM234A  | NM_207217_17_-_1      |
| Oard1    | 3.899  | 4.370  | 3.321  | 2.917  | 2.775  | 2.783  | 2.926  | 3.604  | 3.878  | 3.532  | 106821 | OARD1    | NM_207219_17_+_1      |
| Gpr137   | 1.243  | 1.255  | 0.744  | 0.963  | 1.600  | 1.758  | 1.541  | -0.910 | 1.848  | 1.438  | 107173 | GPR137   | NM_207220_19_-_1      |
| Jmjd1c   | 3.245  | 3.219  | 4.178  | 3.971  | 5.360  | 5.254  | 5.242  | 4.395  | 4.611  | 4.821  | 108829 | JMJD1C   | NM_207221_10_+_1      |
| Acap3    | 2.711  | 3.478  | 2.431  | 2.918  | 3.313  | 3.197  | 3.001  | 3.396  | 5.209  | 5.224  | 140500 | ACAP3    | NM_207223_4_+_1       |
| Hdac4    | 2.356  | 1.767  | 2.820  | 3.022  | 3.714  | 3.572  | 3.612  | 3.095  | 3.982  | 3.537  | 208727 | HDAC4    | NM_207225_1_-_1       |
| Tsga10   | -0.624 | -1.456 | -3.586 | -3.053 | -2.354 | -3.198 | -1.557 | -1.231 | 1.028  | 0.475  | 211484 | TSGA10   | NM_207228_1_-_1       |
| Plac9a   | -4.001 | -4.981 | -4.762 | -4.959 | -4.853 | -4.949 | -4.437 | -3.926 | -4.981 | -4.981 | 211623 | NA       | NM_207229_14_-_1      |
| Plac9a   | -4.001 | -4.981 | -4.762 | -4.959 | -4.853 | -4.949 | -4.439 | -4.922 | -4.981 | -4.981 | 211623 | NA       | NM_207229_dup1_14_-_2 |
| Plac9a   | -4.001 | -4.981 | -4.762 | -4.959 | -4.853 | -4.949 | -4.439 | -4.922 | -4.981 | -4.981 | 211623 | NA       | NM_207229_dup2_14_-_3 |
| Arl5c    | 7.576  | 7.344  | 6.610  | 6.721  | 6.597  | 6.130  | 7.579  | 7.528  | 7.435  | 7.703  | 217151 | ARL5C    | NM_207231_11_-_1      |
| Ptpdc1   | 1.931  | 2.774  | 1.204  | 0.887  | 0.916  | 0.647  | 0.499  | 0.151  | 0.238  | 1.124  | 218232 | PTPDC1   | NM_207232_13_-_1      |
| Rexo4    | 5.406  | 5.412  | 6.561  | 6.547  | 6.246  | 6.050  | 5.996  | 5.870  | 5.245  | 5.094  | 227656 | REXO4    | NM_207234_2_-_1       |
| Man1c1   | 5.721  | 6.208  | 2.350  | 1.938  | 2.034  | 1.312  | 4.093  | 4.246  | 6.005  | 5.882  | 230815 | MAN1C1   | NM_207237_4_-_1       |
| Fbxo27   | -2.037 | -4.981 | -4.700 | -3.420 | -4.936 | -4.112 | -4.363 | -3.610 | -4.053 | -2.897 | 233040 | FBXO27   | NM_207238_7_+_1       |
| Gtf3c1   | 3.371  | 3.742  | 4.229  | 4.636  | 4.243  | 4.624  | 4.170  | 4.402  | 4.826  | 4.859  | 233863 | GTF3C1   | NM_207239_7_-_1       |
| Npc111   | -4.981 | -4.981 | -4.980 | -4.566 | -4.976 | -4.976 | -4.937 | -4.806 | -2.150 | -1.968 | 237636 | NPC111   | NM_207242_11_-_1      |
| Cd200r4  | 0.979  | -3.315 | 0.524  | -3.836 | -0.973 | -4.925 | 0.649  | -4.782 | 0.579  | -4.981 | 239849 | CD200R1L | NM_207244_16_+_1      |
| Zfp870   | 1.855  | 2.113  | 2.642  | 2.417  | 3.738  | 3.418  | 3.265  | 2.934  | 3.500  | 3.354  | 240066 | NA       | NM_207245_17_-_1      |
| Rasgrp3  | 0.359  | -2.048 | 7.249  | 7.525  | 6.142  | 6.760  | 4.551  | 5.273  | -1.644 | 0.005  | 240168 | RASGRP3  | NM_207246_17_+_1      |
| Zfp532   | -3.563 | -4.981 | -2.154 | -0.919 | 0.834  | 1.721  | -1.821 | -1.456 | -4.981 | -4.981 | 328977 | NA       | NM_207255_18_+_1      |
| Ankrd34c | -4.981 | -4.981 | -3.721 | -4.868 | -2.399 | -1.747 | -4.848 | -4.866 | -1.372 | -4.981 | 330998 | ANKRD34C | NM_207260_9_-_1       |
| BC052040 | 3.115  | 3.318  | 1.801  | 1.743  | 1.844  | 2.120  | 2.114  | 1.940  | 1.416  | 2.108  | 399568 | C15orf41 | NM_207264_2_+_1       |
| Tmsb15l  | 4.392  | 4.019  | 3.875  | 3.961  | 4.155  | 3.984  | 3.779  | 3.160  | -0.226 | 0.518  | 399591 | NA       | NM_207267_X_-_1       |
| Ptprh    | -0.351 | -1.535 | 1.090  | 1.367  | -3.873 | -4.555 | -3.019 | -3.051 | -4.981 | -3.210 | 545902 | PTPRH    | NM_207270_7_-_1       |
| Masantd1 | -0.972 | -0.505 | 0.681  | 0.064  | 3.390  | 2.104  | 2.862  | 1.016  | -1.587 | -1.427 | 403174 | MSANTD1  | NM_207277_5_+_1       |
| Plcx41   | -4.014 | -3.566 | -4.325 | -2.942 | -2.577 | -4.911 | -4.193 | -4.861 | -4.244 | -4.561 | 403178 | NA       | NM_207279_5_+_1       |
| Cercam   | 1.318  | 1.538  | 1.051  | 0.847  | 3.448  | 3.189  | 3.106  | 2.765  | 2.174  | 1.668  | 99151  | CERCAM   | NM_207298_2_+_1       |
| Wrb      | 4.548  | 5.526  | 3.191  | 3.336  | 2.801  | 2.947  | 2.769  | 3.353  | 3.227  | 3.854  | 71446  | WRB      | NM_207301_16_+_1      |
| Zranb1   | 4.003  | 3.845  | 3.971  | 4.007  | 4.073  | 4.042  | 3.981  | 3.697  | 4.252  | 3.962  | 360216 | ZRANB1   | NM_207302_7_+_1       |
| Mbnl2    | 5.380  | 5.557  | 5.804  | 5.740  | 5.142  | 5.502  | 5.899  | 5.983  | 6.578  | 7.018  | 105559 | MBNL2    | NM_207515_14_+_1      |
| Mettl25  | 3.430  | 3.514  | 3.229  | 3.277  | 2.878  | 2.769  | 2.816  | 3.107  | 3.098  | 3.306  | 216292 | METTL25  | NM_207522_10_-_1      |
| Rpl23a   | 9.557  | 9.359  | 9.916  | 9.791  | 9.767  | 9.478  | 10.083 | 9.674  | 8.708  | 8.456  | 268449 | NA       | NM_207523_11_-_1      |
| Opa3     | 3.859  | 4.538  | 4.385  | 4.845  | 5.006  | 5.353  | 4.676  | 4.845  | 4.249  | 4.570  | 403187 | OPA3     | NM_207525_7_+_1       |
| Osbpl1a  | 2.177  | 2.852  | 1.539  | 1.865  | 2.187  | 2.278  | 2.415  | 2.056  | 1.764  | 1.798  | 64291  | OSBPL1A  | NM_207530_18_-_1      |
| Zfp81    | 2.727  | 3.433  | 2.404  | 2.414  | 2.599  | 2.601  | 2.057  | 2.500  | 1.872  | 2.753  | 224694 | NA       | NM_207541_17_-_1      |
| Rnf138   | 5.259  | 5.292  | 4.742  | 4.687  | 4.410  | 4.641  | 4.380  | 3.981  | 3.708  | 4.132  | 56515  | RNF138   | NM_207623_18_+_1      |
| Ace      | -4.981 | -4.981 | -0.630 | -1.367 | 0.158  | 0.443  | 5.497  | 7.054  | 7.421  | 7.601  | 11421  | ACE      | NM_207624_11_+_1      |
| Acs14    | 2.258  | 2.221  | -0.291 | 0.988  | -1.408 | -1.767 | 0.018  | 0.316  | 2.265  | 2.580  | 50790  | ACSL4    | NM_207625_X_-_1       |
| Yipf6    | 5.424  | 5.611  | 5.038  | 5.029  | 4.493  | 4.683  | 4.883  | 5.074  | 5.086  | 5.385  | 77929  | YIPF6    | NM_207633_X_+_1       |
| Rps24    | 8.934  | 8.615  | 9.082  | 8.721  | 9.067  | 8.604  | 9.337  | 8.853  | 7.959  | 7.488  | 20088  | RPS24    | NM_207634_14_+_1      |
| Rps24    | -1.244 | -4.981 | -4.892 | -2.946 | -1.973 | -4.427 | -1.712 | -4.137 | -3.482 | -4.981 | 20088  | RPS24    | NM_207635_14_+_1      |
| Fndc3a   | 6.593  | 6.965  | 5.545  | 5.323  | 5.204  | 5.223  | 5.854  | 5.886  | 6.308  | 6.583  | 319448 | FNDC3A   | NM_207636_14_-_1      |
| H2-Q6    | 5.806  | 4.369  | 4.819  | 5.032  | 4.566  | 4.064  | 4.543  | 4.405  | 3.788  | 2.712  | 110557 | HLA-A    | NM_207648_17_+_1      |
| Rcan2    | -4.981 | -4.251 | -4.978 | -4.981 | -4.981 | -4.980 | -4.981 | -4.978 | -4.981 | -4.981 | 53901  | RCAN2    | NM_207649_17_+_1      |
| Slc14a2  | -4.981 | -4.981 | -4.981 | -4.981 | -4.981 | -4.981 | -4.981 | -4.981 | -4.981 | -4.981 | 27411  | SLC14A2  | NM_207651_18_-_1      |
| Tsc22d1  | 1.606  | 1.596  | 3.866  | 3.870  | 3.807  | 3.791  | 3.461  | 2.655  | 1.816  | 2.430  | 21807  | TSC22D1  | NM_207652_14_+_1      |
| Cflar    | -2.356 | -0.424 | -2.646 | -3.597 | -1.728 | -2.751 | 3.239  | 2.265  | 4.689  | 4.565  | 12633  | CFLAR    | NM_207653_1_+_1       |
| Efna5    | 0.142  | 0.235  | -4.487 | -4.686 | -4.232 | -4.796 | -4.838 | -4.818 | -4.172 | -4.670 | 13640  | EFNA5    | NM_207654_17_-_1      |
| Egfr     | 3.769  | 4.173  | 0.458  | -0.767 | -4.603 | -4.980 | -4.954 | -1.755 | -4.981 | -2.796 | 13649  | EGFR     | NM_207655_11_+_1      |

|               |        |        |        |        |        |        |        |        |        |        |        |          |                     |
|---------------|--------|--------|--------|--------|--------|--------|--------|--------|--------|--------|--------|----------|---------------------|
| Hook3         | 4.425  | 4.529  | 5.379  | 5.300  | 4.946  | 4.999  | 5.118  | 5.232  | 5.277  | 5.701  | 320191 | HOOK3    | NM_207659_8_-1      |
| Acpp          | -4.981 | -4.981 | -2.627 | -1.663 | -3.155 | -1.896 | -0.083 | -0.748 | 2.155  | 1.018  | 56318  | ACPP     | NM_207668_9_-1      |
| Gabpb1        | -2.878 | 0.699  | -2.791 | -0.640 | -1.041 | -4.835 | -1.110 | -4.544 | -2.024 | 0.238  | 14391  | GABPB1   | NM_207669_2_-1      |
| Gripap1       | 5.051  | 5.012  | 5.673  | 5.691  | 5.676  | 5.904  | 5.687  | 5.811  | 5.758  | 5.758  | 54645  | GRIPAP1  | NM_207670_X_+1      |
| Zfp318        | 2.822  | 3.139  | 3.536  | 3.656  | 2.531  | 2.507  | 2.592  | 2.751  | 1.462  | 2.001  | 57908  | ZNF318   | NM_207671_17_+1     |
| Cadm1         | 3.391  | 7.506  | 6.528  | 7.549  | -0.881 | 2.296  | 0.668  | 4.430  | -3.974 | -1.139 | 54725  | CADM1    | NM_207675_9_+1      |
| Cadm1         | -0.492 | -0.633 | -1.187 | -0.400 | -4.590 | -4.544 | -2.147 | -4.782 | -2.723 | -0.995 | 54725  | CADM1    | NM_207676_9_+1      |
| Dedd2         | 5.562  | 5.793  | 5.628  | 5.492  | 5.914  | 6.090  | 5.389  | 5.001  | 5.577  | 4.936  | 67379  | DEDD2    | NM_207677_7_-1      |
| Ccnl2         | 6.419  | 7.017  | 6.784  | 6.861  | 6.958  | 7.246  | 6.945  | 7.323  | 7.144  | 7.575  | 56036  | CCNL2    | NM_207678_4_+1      |
| Bcl2l11       | 2.606  | 3.092  | 5.161  | 4.806  | 3.361  | 2.893  | 3.368  | 3.807  | 5.431  | 5.922  | 12125  | BCL2L11  | NM_207680_2_+1      |
| Bcl2l11       | 0.066  | 1.978  | 3.499  | 3.101  | 1.953  | 1.327  | 2.015  | 2.786  | 3.465  | 3.603  | 12125  | BCL2L11  | NM_207681_2_+1      |
| Kif1b         | 0.296  | 2.491  | 2.764  | 3.267  | 2.783  | 3.829  | 2.483  | 3.741  | 4.353  | 5.179  | 16561  | KIF1B    | NM_207682_4_-1      |
| Espn          | -1.555 | -1.910 | -1.790 | -2.231 | -0.525 | -0.943 | -0.110 | -0.231 | 1.312  | 1.246  | 56226  | ESPN     | NM_207687_4_-1      |
| Espn          | -4.886 | -4.981 | -4.741 | -4.976 | -4.961 | -4.885 | -4.529 | -4.965 | -4.981 | -4.981 | 56226  | ESPN     | NM_207688_4_-1      |
| Espn          | -2.832 | -4.981 | -4.971 | -4.815 | -4.145 | -4.985 | -4.147 | -4.931 | -4.981 | -2.930 | 56226  | ESPN     | NM_207689_4_-1      |
| Espn          | -4.981 | -4.981 | -4.979 | -4.337 | -4.967 | -4.792 | -4.133 | -4.781 | -4.981 | -3.085 | 56226  | ESPN     | NM_207690_4_-1      |
| Espn          | -4.981 | -4.981 | -4.182 | -4.974 | -4.981 | -4.981 | -4.880 | -4.969 | -4.981 | -4.981 | 56226  | ESPN     | NM_207691_4_-1      |
| Mapk9         | 5.060  | 4.787  | 6.236  | 6.118  | 5.550  | 5.275  | 5.328  | 5.256  | 5.525  | 5.394  | 26420  | MAPK9    | NM_207692_11_+1     |
| Elmo2         | -3.732 | -0.647 | -0.615 | 0.677  | -0.894 | -0.062 | 0.426  | 1.453  | 2.188  | 1.566  | 140579 | ELMO2    | NM_207706_2_-1      |
| Syngri1       | -4.981 | -4.981 | -4.595 | -3.920 | -4.980 | -3.938 | -3.933 | -3.218 | -3.255 | -4.316 | 20972  | SYNGR1   | NM_207708_15_+1     |
| Eya3          | 3.870  | 4.064  | 4.942  | 4.957  | 4.953  | 5.124  | 4.538  | 4.154  | 3.483  | 3.574  | 14050  | EYA3     | NM_210071_4_+1      |
| Pcyt1b        | -4.981 | -4.981 | -3.636 | -1.219 | 1.044  | 0.991  | -0.896 | -1.565 | -2.248 | -1.851 | 236899 | PCYT1B   | NM_211138_X_+1      |
| Smek1         | 3.501  | 3.623  | 5.076  | 5.226  | 5.268  | 4.869  | 5.284  | 5.023  | 5.407  | 5.833  | 68734  | PPP4R3A  | NM_211355_12_-1     |
| Eya3          | -4.500 | -4.570 | -2.635 | -0.868 | -2.448 | -2.078 | -1.709 | -1.263 | -4.946 | -4.956 | 14050  | EYA3     | NM_211357_4_+1      |
| Slc35c1       | 2.075  | 1.099  | 3.151  | 3.061  | 3.011  | 2.690  | 3.499  | 4.015  | 5.186  | 5.042  | 228368 | SLC35C1  | NM_211358_2_-1      |
| Fbxo3         | 4.575  | 4.853  | 4.635  | 4.542  | 4.463  | 4.645  | 4.609  | 4.593  | 4.655  | 4.837  | 57443  | FBXO3    | NM_212433_2_+1      |
| Wiz           | 0.279  | -0.570 | 1.240  | 0.653  | 1.284  | 0.928  | 1.518  | 0.756  | 2.347  | 2.237  | 22404  | WIZ      | NM_212438_17_-1     |
| Gk            | -1.339 | 0.187  | 0.977  | -1.018 | 0.578  | -3.395 | 1.711  | 1.559  | 2.581  | 1.618  | 14933  | NA       | NM_212444_X_-1      |
| Kdelc2        | 0.864  | 1.054  | 2.272  | 3.084  | -0.847 | -0.499 | 0.672  | 2.178  | 2.569  | 3.161  | 68304  | KDEL2    | NM_212445_9_+1      |
| Psmf1         | 6.355  | 6.104  | 5.640  | 6.000  | 5.437  | 5.865  | 5.431  | 5.845  | 5.117  | 5.543  | 228769 | PSMF1    | NM_212446_2_-1      |
| AU019823      | 4.296  | 4.237  | 4.198  | 4.008  | 3.433  | 3.941  | 4.188  | 3.588  | 3.951  | 4.179  | 270156 | C11orf57 | NM_212449_9_-1      |
| Ctdspl2       | 4.538  | 4.720  | 4.493  | 4.520  | 4.718  | 4.694  | 4.823  | 4.741  | 4.425  | 4.880  | 329506 | CTDSPL2  | NM_212450_2_+1      |
| Rxfp1         | -2.505 | -1.263 | -4.946 | -4.946 | -4.951 | -4.683 | -4.971 | -3.495 | -4.981 | -4.981 | 381489 | RXFP1    | NM_212452_3_-1      |
| Bex4          | -2.739 | -0.454 | -4.758 | -0.649 | -1.548 | 0.404  | -2.443 | 0.521  | -4.981 | -2.571 | 406217 | BEX4     | NM_212457_X_+1      |
| Ssbp1         | 5.740  | 5.218  | 5.005  | 4.844  | 4.009  | 3.944  | 4.587  | 4.281  | 3.049  | 3.338  | 381760 | SGBP1    | NM_212468_6_+1      |
| Atraid        | 1.815  | 1.560  | -0.564 | -0.235 | 0.058  | 0.312  | 0.271  | -0.530 | 0.062  | -0.290 | 381629 | ATRAID   | NM_212470_5_+1      |
| Fam53b        | 3.582  | 3.536  | 3.991  | 3.738  | 4.840  | 4.488  | 4.006  | 3.759  | 3.889  | 4.378  | 77938  | FAM53B   | NM_212473_7_-1      |
| Cnot6         | 3.992  | 4.166  | 4.885  | 5.114  | 5.070  | 5.054  | 4.735  | 5.003  | 4.382  | 5.004  | 104625 | CNOT6    | NM_212484_11_-1     |
| Gimap8        | -0.097 | -0.131 | -4.514 | -1.429 | -2.763 | -2.829 | -1.100 | 0.693  | -2.336 | -1.660 | 243374 | GIMAP8   | NM_212486_6_+1      |
| Sept5         | -3.349 | -2.120 | -2.485 | -1.669 | -3.740 | -3.464 | -4.439 | -2.273 | 0.705  | -3.275 | 18951  | SEPT5    | NM_213614_16_-1     |
| A530032D15Rik | 5.291  | 4.619  | 2.727  | 3.599  | 3.088  | 3.650  | 2.216  | 3.139  | 1.709  | 3.074  | 381287 | NA       | NM_213615_1_-1      |
| Atp2b4        | 4.086  | 5.855  | -4.218 | 0.566  | -2.517 | 0.956  | -0.251 | 1.762  | 0.788  | 3.371  | 381290 | ATP2B4   | NM_213616_1_-1      |
| Stat3         | 6.511  | 6.011  | 7.013  | 6.877  | 7.050  | 7.098  | 6.976  | 6.817  | 8.138  | 8.003  | 20848  | STAT3    | NM_213659_11_-1     |
| Stat3         | 4.559  | 4.336  | 4.681  | 4.698  | 5.403  | 4.787  | 4.802  | 4.289  | 5.968  | 5.723  | 20848  | STAT3    | NM_213660_11_-1     |
| Inca1         | -4.672 | -4.827 | -4.647 | -3.855 | -4.944 | -2.920 | -4.846 | -4.966 | -4.953 | -4.899 | 103844 | INCA1    | NM_213729_11_-1     |
| Npepl1        | 6.100  | 6.201  | 6.728  | 6.591  | 6.396  | 6.544  | 6.285  | 6.308  | 6.117  | 6.076  | 228961 | NPEPL1   | NM_213733_2_+1      |
| Snord35a      | -4.981 | -4.981 | -3.511 | -4.379 | -4.501 | -4.890 | -4.039 | -4.942 | -3.738 | -3.882 | 27211  | NA       | NR_000003_7_-1      |
| Tyms-ps       | -4.981 | -4.981 | -4.965 | -4.702 | -4.945 | -4.922 | -4.968 | -4.916 | -4.981 | -4.981 | 22172  | NA       | NR_000040_10_+1     |
| Rmrp          | -2.304 | -2.533 | -3.443 | -3.189 | -2.858 | -3.164 | -3.891 | -4.039 | -2.641 | -3.205 | 19782  | NA       | NR_001460_4_-1      |
| Kcnq1ot1      | 5.488  | 5.773  | 6.112  | 6.108  | 5.607  | 6.022  | 5.219  | 5.248  | 3.465  | 4.311  | 63830  | NA       | NR_001461_7_-1      |
| Xist          | 8.895  | 8.874  | 8.314  | 7.998  | 8.760  | 8.861  | 8.370  | 8.033  | 7.130  | 7.416  | 213742 | NA       | NR_001463_X_-1      |
| Xist          | -1.758 | -2.275 | -1.122 | -1.520 | -3.316 | 0.275  | -4.936 | -0.574 | -1.550 | -4.833 | 213742 | NA       | NR_001570_X_-1      |
| Terc          | -2.178 | -1.591 | -4.965 | -3.759 | -4.322 | -4.506 | -4.690 | -4.344 | -3.022 | -3.205 | 21748  | NA       | NR_001579_3_-1      |
| Speer1        | -4.981 | -4.981 | -4.871 | -4.871 | -4.980 | -4.961 | -4.524 | 0.425  | -4.981 | -4.981 | 70896  | NA       | NR_001586_5_+1      |
| Rpph1         | -0.821 | -2.275 | -0.147 | -3.344 | -0.661 | -3.146 | -0.271 | -3.273 | -0.480 | -3.386 | 85029  | NA       | NR_002142_14_-1     |
| Snord15b      | -2.842 | -4.981 | -3.492 | -4.082 | -4.188 | -4.329 | -4.179 | -4.186 | -4.190 | -4.227 | 449631 | NA       | NR_002173_7_-1      |
| Tug1          | 1.927  | -4.109 | -1.571 | -1.945 | -1.381 | -3.519 | 2.318  | -0.181 | 2.245  | 1.570  | 544752 | NA       | NR_002321_11_-1     |
| Tug1          | 4.834  | 4.887  | 5.000  | 4.874  | 4.951  | 4.753  | 4.830  | 4.231  | 4.613  | 5.051  | 544752 | NA       | NR_002322_11_-1     |
| BC002163      | 4.239  | 7.801  | 3.329  | 6.827  | 2.760  | 6.765  | 3.376  | 6.602  | 1.564  | 5.529  | 170658 | NA       | NR_002445_16_+1     |
| BC002163      | 6.824  | -4.981 | 5.795  | -4.883 | 5.523  | -4.891 | 5.655  | -4.676 | 4.607  | -4.981 | 170658 | NA       | NR_002445_4_-1      |
| Gm5424        | 2.027  | 1.737  | 4.104  | 4.764  | 3.172  | 3.582  | 3.225  | 3.188  | 1.989  | 3.496  | 432466 | NA       | NR_002687_2_+1      |
| Gm13363       | 7.067  | 7.094  | 6.733  | 6.848  | 7.163  | 7.346  | 7.246  | 7.311  | 7.838  | 7.970  | 433406 | NA       | NR_002688_1_-1      |
| Gm7334        | 4.737  | 3.930  | 0.286  | 1.366  | 1.945  | 1.138  | 1.246  | 2.720  | 1.550  | 1.506  | 654432 | NA       | NR_002700_16_-1     |
| Npm3-ps1      | -2.793 | -3.193 | -3.241 | -4.056 | -4.413 | -4.532 | -4.140 | -4.174 | -4.981 | -4.072 | 108176 | NA       | NR_002702_6_+1      |
| Gas5          | 7.325  | 7.268  | 7.538  | 7.443  | 7.148  | 7.130  | 7.218  | 7.100  | 5.606  | 5.500  | 14455  | NA       | NR_002840_1_+1      |
| Rn4.5s        | 0.474  | 1.037  | 2.369  | 2.417  | 1.918  | 2.133  | 1.418  | 1.706  | 1.129  | 1.837  | 19799  | NA       | NR_002841_6_-1      |
| Rn4.5s        | 0.474  | 1.037  | 2.364  | 2.132  | 1.919  | 2.130  | 1.422  | 1.564  | 0.549  | 1.837  | 19799  | NA       | NR_002841_dup1_6_-1 |
| Rn4.5s        | 0.474  | 1.037  | 2.382  | 2.391  | 1.912  | 2.144  | 1.418  | 1.706  | 1.129  | 1.837  | 19799  | NA       | NR_002841_dup2_6_-1 |
| Rn4.5s        | 0.474  | 1.037  | 2.369  | 2.417  | 1.918  | 2.133  | 1.418  | 1.706  | 1.129  | 1.837  | 19799  | NA       | NR_002841_dup3_6_-1 |
| Rn4.5s        | 0.474  | 1.037  | 2.369  | 2.417  | 1.811  | 2.144  | 1.418  | 1.706  | 1.129  | 1.837  | 19799  | NA       | NR_002841_dup4_6_-1 |
| Rn4.5s        | 0.474  | 1.037  | 2.382  | 2.391  | 1.912  | 2.144  | 1.418  | 1.706  | 1.129  | 1.837  | 19799  | NA       | NR_002841_dup5_6_-1 |
| Rn4.5s        | -0.188 | -2.083 | 0.806  | 0.135  | 0.057  | -0.996 | -0.084 | -1.923 | -0.406 | -0.973 | 19799  | NA       | NR_002841_dup6_6_-1 |
| Rn4.5s        | -0.188 | -2.083 | 0.806  | 0.135  | 0.057  | -0.996 | -0.084 | -1.923 | -0.406 | -0.973 | 19799  | NA       | NR_002841_dup7_6_-1 |
| Rn4.5s        | -0.188 | -2.083 | 0.806  | 0.135  | 0.057  | -0.996 | -0.084 | -1.923 | -0.406 | -0.973 | 19799  | NA       | NR_002841_dup8_6_-2 |

|               |        |        |        |        |        |        |        |        |        |        |           |          |                      |
|---------------|--------|--------|--------|--------|--------|--------|--------|--------|--------|--------|-----------|----------|----------------------|
| Rn4.5s        | -0.188 | -2.083 | 0.806  | 0.135  | 0.057  | -0.996 | -0.084 | -1.930 | -0.406 | -0.973 | 19799     | NA       | NR_002841_dup9_6_-_2 |
| Tsix          | 6.370  | 8.848  | 3.617  | 5.738  | 4.446  | 7.045  | 4.513  | 5.972  | 1.479  | 3.568  | 22097     | NA       | NR_002844_X_+_1      |
| Nespas        | -1.492 | -4.981 | -3.199 | -4.909 | -2.196 | -3.608 | -1.420 | -4.871 | -1.610 | -4.981 | 56802     | NA       | NR_002846_2_-_1      |
| Malat1        | 11.730 | 12.323 | 13.060 | 12.915 | 12.547 | 12.824 | 11.692 | 11.598 | 9.825  | 10.219 | 72289     | NA       | NR_002847_19_-_1     |
| Airn          | -4.981 | -4.981 | -3.800 | -3.957 | -4.987 | -4.873 | -4.874 | -2.362 | -4.981 | -4.342 | 104103    | NA       | NR_002853_17_+_1     |
| Gm4956        | -0.342 | -4.981 | -1.777 | -4.947 | 3.944  | -4.890 | 2.218  | -4.785 | -2.174 | -4.981 | 241041    | NA       | NR_002858_1_-_1      |
| Serpina4-ps1  | -4.981 | -4.981 | -4.981 | -4.981 | -4.602 | 2.327  | -4.966 | -1.832 | -4.981 | -4.981 | 321018    | NA       | NR_002861_12_+_1     |
| Gm5088        | -3.448 | -0.582 | -1.961 | -1.695 | -2.940 | -2.068 | -2.654 | -3.187 | -4.132 | -2.942 | 328451    | NA       | NR_002862_14_+_1     |
| Peg13         | 5.378  | 4.761  | 3.337  | 2.532  | 4.775  | 4.336  | 4.448  | 3.540  | 4.030  | 3.569  | 353342    | NA       | NR_002864_15_-_1     |
| Rnu11         | -2.505 | -3.267 | -2.915 | -2.929 | -2.396 | -2.154 | -2.021 | -2.817 | -1.953 | -1.890 | 353373    | NA       | NR_002865_4_-_1      |
| Dnm3os        | -4.981 | -4.981 | -4.854 | -3.404 | -4.933 | -3.148 | -4.981 | -4.981 | -4.981 | -4.981 | 474332    | NA       | NR_002870_1_+_1      |
| Gm1821        | 8.797  | 10.448 | 7.950  | 9.750  | 7.551  | 9.728  | 7.300  | 9.600  | 5.744  | 8.862  | 218963    | NA       | NR_002875_11_+_1     |
| Gm1821        | 8.813  | 11.755 | 7.572  | 10.915 | 7.358  | 10.935 | 7.288  | 10.776 | 5.541  | 10.036 | 218963    | NA       | NR_002875_14_+_1     |
| Gm5643        | 5.607  | 4.218  | 4.088  | 3.764  | 4.419  | 4.507  | 4.748  | 3.115  | 3.391  | 2.633  | 434858    | NA       | NR_002883_15_+_1     |
| Gm5643        | -1.668 | -0.365 | -1.567 | -1.924 | -1.632 | -3.202 | -1.562 | -3.362 | -3.047 | -3.053 | 434858    | NA       | NR_002883_X_+_1      |
| Gm10052       | -4.605 | -4.444 | -2.646 | 0.386  | -1.729 | 0.107  | -3.934 | -1.822 | 0.023  | -0.171 | 654467    | NA       | NR_002885_15_+_1     |
| Smarca5-ps    | -3.495 | -3.131 | -2.565 | -3.656 | -3.466 | -3.483 | -2.549 | -4.555 | -2.637 | -3.207 | 545700    | NA       | NR_002888_4_+_1      |
| Gm5801        | -1.950 | 2.943  | -2.254 | 2.836  | -3.592 | 2.460  | -2.970 | 2.461  | -2.293 | 2.719  | 545056    | NA       | NR_002889_14_-_1     |
| Gm5801        | 6.047  | 5.823  | 5.771  | 5.419  | 5.600  | 5.101  | 5.563  | 5.200  | 5.499  | 5.045  | 545056    | NA       | NR_002889_4_+_1      |
| Gm12070       | 4.779  | 4.842  | 4.604  | 4.856  | 3.891  | 3.989  | 4.192  | 4.053  | 2.650  | 2.507  | 654472    | NA       | NR_002890_11_+_1     |
| Gm5512        | -1.478 | -4.365 | -0.806 | -4.749 | -4.213 | -4.840 | -1.018 | -3.458 | -1.706 | -4.933 | 433224    | NA       | NR_002891_10_-_1     |
| Gm5512        | -2.715 | -1.576 | -2.472 | -2.862 | -3.792 | -4.254 | -2.761 | -4.757 | -4.981 | -4.020 | 433224    | NA       | NR_002891_19_+_1     |
| Snhg1         | 4.172  | 4.237  | 4.069  | 3.823  | 3.361  | 3.498  | 3.334  | 3.427  | 1.840  | 1.945  | 83673     | NA       | NR_002896_19_+_1     |
| Snora64       | -2.268 | -1.893 | -2.636 | -3.978 | -2.985 | -4.218 | -3.516 | -3.398 | -2.327 | -2.797 | 104366    | NA       | NR_002897_17_+_1     |
| Snora65       | -2.123 | -2.437 | -2.483 | -2.721 | -2.902 | -4.644 | -3.633 | -3.574 | -4.981 | -4.227 | 104367    | NA       | NR_002898_2_+_1      |
| Snora70       | -1.718 | -2.533 | -1.871 | -2.037 | -2.006 | -2.500 | -2.370 | -3.642 | -2.923 | -2.909 | 104368    | NA       | NR_002899_X_+_1      |
| Snora68       | -2.026 | -1.736 | -1.000 | -1.836 | -1.497 | -2.942 | -2.175 | -2.738 | -2.475 | -3.459 | 104370    | NA       | NR_002901_8_-_1      |
| Snora74a      | -4.981 | -4.981 | -4.764 | -4.923 | -4.830 | -4.867 | -4.980 | -4.418 | -4.394 | -4.981 | 436583    | NA       | NR_002905_18_+_1     |
| Gm1943        | 2.906  | 5.395  | 2.479  | 4.753  | 2.563  | 4.700  | 2.050  | 4.341  | 1.777  | 3.530  | 384864    | NA       | NR_002928_8_-_1      |
| Snhg10        | 1.537  | 0.512  | -0.206 | -0.535 | 0.016  | -0.691 | 0.446  | 0.012  | 0.605  | -0.381 | 69434     | NA       | NR_003145_12_-_1     |
| Gnas          | 9.179  | 9.107  | 8.046  | 8.256  | 7.816  | 7.939  | 7.761  | 8.097  | 8.118  | 8.020  | 14683     | GNAS     | NR_003258_2_+_1      |
| Snhg3         | 5.777  | 5.024  | 4.603  | 4.364  | 4.430  | 4.203  | 5.068  | 4.628  | 4.170  | 3.595  | 399101    | NA       | NR_003270_4_-_1      |
| Rab11fip4os1  | -2.388 | -2.124 | -1.708 | -2.452 | -3.522 | -2.718 | -3.095 | -3.810 | -3.088 | -3.210 | 790912    | NA       | NR_003283_11_-_1     |
| Zxda          | 4.060  | 4.603  | 2.837  | 2.376  | 2.766  | 2.744  | 2.840  | 2.245  | 2.742  | 2.873  | 668171    | NA       | NR_003292_X_-_1      |
| D030028A08Rik | 1.842  | 2.332  | 2.289  | 2.308  | 3.055  | 3.392  | 2.890  | 2.644  | 1.249  | 1.718  | 319371    | NA       | NR_003293_11_+_1     |
| Gm6548        | 2.159  | 0.782  | 2.376  | 0.665  | 2.092  | -0.573 | 2.455  | -0.048 | 2.887  | 0.656  | 625054    | NA       | NR_003363_17_-_1     |
| BC018473      | -4.981 | 9.062  | -4.853 | 5.752  | -4.674 | 9.163  | -4.619 | 7.519  | -4.981 | 5.497  | 193217    | NA       | NR_003364_11_+_1     |
| Pvt1          | -1.549 | -1.460 | 0.804  | 1.454  | 1.773  | 2.399  | 1.861  | 2.173  | -0.990 | 0.921  | 19296     | NA       | NR_003368_15_+_1     |
| Gm15772       | 8.432  | 8.280  | 8.766  | 8.522  | 8.563  | 8.367  | 8.927  | 8.548  | 7.678  | 7.332  | 100034726 | NA       | NR_003373_11_+_1     |
| Gm7367        | -1.465 | 2.754  | -0.372 | 2.713  | -0.087 | 2.187  | -0.009 | 3.052  | 3.247  | 3.746  | 664849    | NA       | NR_003376_11_+_1     |
| 2210409E12Rik | -2.784 | -4.981 | -4.566 | -4.520 | -4.985 | -4.616 | -4.821 | -3.507 | -3.043 | -4.981 | 72381     | NA       | NR_003492_11_+_1     |
| Oas1b         | -0.910 | -1.679 | -1.085 | -2.415 | 1.736  | 1.097  | 0.850  | -0.100 | 1.646  | 0.153  | 23961     | NA       | NR_003507_5_+_1      |
| Mx2           | 3.309  | 4.047  | 3.195  | 2.656  | 2.904  | 2.306  | 3.113  | 3.105  | 3.704  | 3.816  | 17858     | NA       | NR_003508_16_+_1     |
| Neat1         | 6.528  | 6.780  | 6.899  | 7.428  | 8.007  | 8.668  | 7.785  | 7.818  | 7.718  | 8.077  | 66961     | NA       | NR_003513_19_-_1     |
| Pisd-ps1      | 8.118  | 5.446  | 4.180  | 3.926  | 5.732  | 5.787  | 5.090  | 4.752  | 4.453  | 4.216  | 236604    | NA       | NR_003517_11_+_1     |
| Pisd-ps2      | 0.369  | 0.790  | 0.454  | 0.160  | 1.501  | 0.913  | 0.289  | 0.041  | 0.626  | 0.517  | 328734    | NA       | NR_003519_17_-_1     |
| Mx1           | 2.896  | 2.405  | 4.730  | 3.845  | 3.188  | 2.652  | 3.837  | 3.092  | 4.427  | 3.555  | 17857     | NA       | NR_003520_16_-_1     |
| Abhd1         | 2.046  | 0.635  | 1.615  | -1.893 | 3.150  | 0.387  | 2.975  | 0.024  | 2.832  | 0.382  | 57742     | NA       | NR_003522_5_+_1      |
| H2afy3        | -4.981 | -4.981 | -4.985 | -4.724 | -4.093 | -3.590 | -4.309 | -4.723 | -4.981 | -4.981 | 67552     | NA       | NR_003523_15_-_1     |
| Trappc13      | 4.803  | 4.595  | 3.081  | 2.629  | 2.777  | 3.031  | 2.858  | 2.622  | 2.786  | 2.465  | 66975     | TRAPPC13 | NR_003546_13_-_1     |
| Vmn2r29       | -1.377 | -4.981 | -2.062 | -3.011 | -0.163 | -2.308 | -0.917 | -2.366 | -1.396 | -3.236 | 76229     | NA       | NR_003555_7_-_1      |
| Mrpl48        | -0.199 | -3.360 | -4.109 | -4.444 | -2.060 | -4.745 | -4.109 | -2.506 | -4.330 | -3.931 | 52443     | MRPL48   | NR_003559_7_-_1      |
| Gm15698       | -2.686 | 1.489  | -1.532 | 0.420  | -4.936 | 1.079  | -3.871 | 0.678  | -4.981 | -0.202 | 217066    | NA       | NR_003564_11_-_1     |
| Gpr137b-ps    | 6.647  | 7.101  | 6.270  | 6.583  | 5.315  | 5.668  | 5.874  | 6.058  | 6.256  | 6.419  | 664862    | NA       | NR_003568_13_-_1     |
| Gm6455        | -4.981 | -4.981 | -4.843 | -4.552 | -4.973 | -4.751 | -2.026 | 0.838  | -4.981 | -4.981 | 623849    | NA       | NR_003596_5_+_1      |
| 6330549D23Rik | -0.609 | -0.717 | -1.981 | -2.512 | -1.309 | -2.588 | -1.123 | -3.169 | -1.760 | -2.370 | 229613    | NA       | NR_003619_3_-_1      |
| Gm5069        | -0.931 | -1.093 | -0.725 | -1.398 | -1.065 | -1.692 | -2.370 | -2.973 | -0.978 | -1.374 | 277333    | NA       | NR_003623_1_-_1      |
| Gm6498        | -0.767 | -2.151 | -3.229 | -3.726 | -3.605 | -4.893 | -3.559 | -4.380 | -1.739 | -1.252 | 624367    | NA       | NR_003630_14_+_1     |
| Gm6787        | -0.640 | -0.729 | -2.420 | -2.525 | -1.225 | -2.784 | -3.254 | -4.973 | -2.158 | -2.307 | 627782    | NA       | NR_003632_X_+_1      |
| Meg3          | -4.981 | -4.981 | -4.049 | -4.138 | -4.859 | -3.866 | -2.898 | -4.752 | -4.981 | -4.981 | 17263     | NA       | NR_003633_12_+_1     |
| Rps4l         | 6.013  | 5.486  | 4.186  | 3.430  | 3.159  | 2.440  | 3.377  | 3.104  | 2.652  | 2.669  | 66184     | NA       | NR_003634_6_+_1      |
| Snora15       | -4.981 | -4.981 | -4.449 | -4.833 | -4.353 | -4.936 | -4.960 | -4.813 | -4.981 | -4.981 | 100113364 | NA       | NR_003681_5_+_1      |
| Hyl           | 4.245  | 1.650  | 3.466  | 1.761  | 3.715  | 1.341  | 3.846  | 0.818  | 2.491  | -0.723 | 68180     | NA       | NR_003946_4_+_1      |
| Asb7          | -0.566 | -1.577 | -0.087 | -0.441 | 0.850  | 0.568  | -0.371 | -0.286 | 0.925  | 1.043  | 117589    | ASB7     | NR_003961_7_-_1      |
| Gm10653       | -1.043 | -0.019 | -2.172 | 0.550  | -2.779 | -0.386 | -3.175 | 0.356  | -4.202 | -0.422 | 677044    | NA       | NR_003965_9_-_1      |
| Atp10d        | 2.641  | 2.852  | 5.336  | 5.572  | 5.356  | 5.575  | 5.498  | 5.395  | 4.898  | 5.532  | 231287    | NA       | NR_003966_5_+_1      |
| Gm4759        | 1.510  | 4.314  | -1.271 | 1.546  | -2.163 | 3.508  | -1.177 | 4.644  | -1.071 | 5.955  | 209380    | NA       | NR_003967_7_-_1      |
| Btln5-ps      | -4.981 | -4.981 | -3.741 | -4.398 | -4.983 | -4.983 | -4.852 | -4.362 | -4.981 | -4.981 | 81497     | NA       | NR_004051_17_-_1     |
| Gm9079        | -1.203 | -3.408 | -2.854 | -2.808 | -3.576 | -3.642 | -3.189 | -3.718 | -2.004 | -0.710 | 668272    | NA       | NR_004052_10_-_1     |
| Adarb1        | -4.223 | -3.303 | -4.610 | -4.426 | -4.429 | -4.736 | -4.127 | -4.529 | -4.600 | -4.159 | 110532    | ADARB1   | NR_004429_10_-_1     |
| Rnu12         | -1.803 | -2.153 | -2.577 | -2.295 | -1.553 | -1.400 | -1.729 | -2.136 | -3.189 | -2.388 | 104307    | NA       | NR_004432_15_+_1     |
| Gm8234        | -1.629 | -3.261 | -3.185 | -3.337 | -3.353 | -4.157 | -4.315 | -3.225 | -2.977 | -2.849 | 666680    | NA       | NR_004433_3_+_1      |
| Apoo-ps       | -4.981 | -4.981 | -4.944 | -4.946 | -4.981 | -4.981 | -4.883 | -4.971 | -4.769 | -4.981 | 621156    | NA       | NR_004438_X_+_1      |
| Gm15421       | 0.952  | 1.410  | 0.176  | 0.727  | 0.216  | 0.285  | 0.186  | 0.350  | -0.115 | -0.205 | 100042049 | NA       | NR_004442_5_-_1      |

|               |        |        |        |        |        |        |        |        |        |        |           |    |                  |
|---------------|--------|--------|--------|--------|--------|--------|--------|--------|--------|--------|-----------|----|------------------|
| Zfhx2os       | -4.935 | -3.132 | -2.593 | -4.757 | -2.249 | -3.323 | -3.579 | -4.959 | -2.144 | -4.429 | 432855    | NA | NR_004444_14_+_1 |
| Snord22       | -3.189 | -2.681 | -2.002 | -3.485 | -2.388 | -2.843 | -2.978 | -3.891 | -3.189 | -3.853 | 100127111 | NA | NR_004445_19_+_1 |
| H2-K2         | 5.431  | 4.564  | 5.430  | 5.394  | 5.975  | 5.492  | 5.719  | 5.196  | 4.451  | 3.541  | 630499    | NA | NR_004446_17_-_1 |
| Gm5523        | -2.740 | -3.263 | -2.150 | -3.588 | -2.845 | -3.308 | -2.752 | -3.676 | -2.628 | -3.573 | 433273    | NA | NR_004447_1_-_1  |
| Gm44502       | -1.139 | -3.690 | -4.604 | -3.355 | -3.350 | -4.963 | -2.434 | -3.452 | -1.901 | -2.236 | 100134861 | NA | NR_004843_15_-_1 |
| Cdk3-ps       | -2.317 | -0.824 | -1.870 | -3.559 | -2.132 | -2.880 | -2.863 | -3.782 | -2.519 | -1.102 | 69681     | NA | NR_004853_11_+_1 |
| Gm12064       | -3.689 | -4.981 | -3.666 | -4.034 | -4.331 | -4.993 | -4.059 | -4.441 | -3.820 | -2.786 | 100134990 | NA | NR_004857_11_-_1 |
| Etohd2        | 2.917  | 3.475  | 1.847  | 1.919  | 1.591  | 2.152  | 2.376  | 1.440  | 1.727  | 2.124  | 13996     | NA | NR_015349_13_+_1 |
| Six3os1       | -4.981 | -4.981 | -4.981 | -4.981 | -4.942 | -4.952 | -4.981 | -4.981 | -4.981 | -4.981 | 100043902 | NA | NR_015385_17_-_1 |
| Six3os1       | -4.981 | -4.981 | -4.981 | -4.981 | -4.949 | -4.949 | -4.981 | -4.981 | -4.981 | -4.981 | 100043902 | NA | NR_015386_17_-_1 |
| BC064078      | 6.006  | 5.500  | 4.736  | 5.857  | 4.132  | 6.348  | 4.560  | 4.813  | 4.338  | 3.606  | 408064    | NA | NR_015455_6_+_1  |
| B430010I23Rik | -4.981 | -2.365 | -3.023 | -3.590 | -3.161 | -4.313 | -1.378 | -1.950 | 2.138  | 0.765  | 78849     | NA | NR_015457_8_+_1  |
| 1700047M11Rik | -4.981 | -4.981 | -4.946 | -4.946 | -4.966 | -4.830 | -4.952 | -4.261 | -1.731 | -4.227 | 67330     | NA | NR_015458_1_+_1  |
| 4933431E20Rik | -4.981 | -2.137 | -4.743 | -1.411 | -4.518 | -1.109 | -2.730 | -1.823 | -3.925 | -4.981 | 329735    | NA | NR_015459_3_-_1  |
| Snhg17        | 2.868  | 2.759  | 2.013  | 2.187  | 2.363  | 2.571  | 1.650  | 1.741  | 1.561  | 0.787  | 68108     | NA | NR_015463_2_-_1  |
| A330069E16Rik | 1.838  | 2.464  | 0.077  | 0.749  | 0.476  | 1.945  | 0.409  | 1.004  | -0.268 | 0.422  | 606735    | NA | NR_015464_2_+_1  |
| C920009B18Rik | 0.999  | 0.618  | 3.233  | 3.425  | 3.674  | 3.676  | 2.682  | 2.548  | 2.742  | 2.716  | 606736    | NA | NR_015465_10_+_1 |
| Ptgs2os       | -4.981 | -4.981 | -4.764 | -3.047 | -2.141 | -1.951 | -2.166 | -4.298 | -4.981 | -3.510 | 320019    | NA | NR_015466_1_-_1  |
| 5530601H04Rik | 3.409  | 3.862  | 3.443  | 3.357  | 4.129  | 4.233  | 3.620  | 3.441  | 3.200  | 3.248  | 71445     | NA | NR_015467_X_-_1  |
| 2900079G21Rik | -4.920 | -4.637 | -4.980 | -4.972 | -4.981 | -4.981 | -4.981 | -4.981 | -4.981 | -4.981 | 620760    | NA | NR_015468_9_+_1  |
| 2610203C22Rik | -3.090 | -0.494 | -2.996 | -2.527 | -4.865 | -3.874 | -1.998 | -1.438 | -2.434 | -1.810 | 72481     | NA | NR_015470_1_-_1  |
| 3830408C21Rik | -1.014 | 0.416  | 0.369  | 0.272  | -0.172 | -0.900 | -0.703 | -0.871 | -0.982 | 0.042  | 100040322 | NA | NR_015471_13_+_1 |
| 9530082P21Rik | 2.254  | 2.793  | 2.620  | 2.310  | 2.818  | 2.675  | 2.568  | 1.602  | 2.433  | 1.775  | 638247    | NA | NR_015472_17_+_1 |
| 1700020114Rik | 5.117  | 4.898  | 4.954  | 4.614  | 4.740  | 4.724  | 4.741  | 4.612  | 4.293  | 4.207  | 66602     | NA | NR_015473_2_+_1  |
| Il1bos        | -2.647 | -4.981 | -0.229 | 0.644  | 1.015  | 1.027  | 0.977  | 0.529  | -0.319 | -1.211 | 329514    | NA | NR_015474_2_+_1  |
| 1700086O06Rik | -0.055 | -4.981 | -3.167 | -4.931 | -1.283 | -5.009 | -1.767 | -4.988 | -4.981 | -4.981 | 73516     | NA | NR_015475_18_-_1 |
| 1500011K16Rik | 5.429  | 5.484  | 5.224  | 5.187  | 4.288  | 4.988  | 4.785  | 4.904  | 3.340  | 3.519  | 67885     | NA | NR_015476_2_-_1  |
| Atcayos       | -2.759 | -1.909 | -4.981 | -4.981 | -4.974 | -4.974 | -4.981 | -4.981 | -4.981 | -4.981 | 69678     | NA | NR_015477_10_+_1 |
| 5730422E09Rik | 0.071  | -0.445 | -2.991 | -2.840 | -2.602 | -1.956 | -3.085 | -3.387 | -2.390 | -3.882 | 433966    | NA | NR_015478_5_-_1  |
| C230091D08Rik | 1.165  | 1.991  | 2.121  | 1.864  | 1.174  | 0.993  | 1.794  | 0.852  | 1.620  | 2.485  | 330544    | NA | NR_015479_7_-_1  |
| Mtag2         | -4.981 | -2.958 | -3.937 | -4.896 | -4.726 | -4.274 | -4.585 | -4.982 | -4.981 | -4.981 | 50994     | NA | NR_015480_7_+_1  |
| 1700108F19Rik | -1.627 | -0.968 | -4.981 | -4.981 | -4.953 | -4.869 | -4.950 | -4.928 | -4.981 | -4.981 | 73272     | NA | NR_015485_14_+_1 |
| D130017N08Rik | 0.565  | -0.393 | 0.145  | -0.075 | 0.100  | 0.200  | -0.906 | -0.540 | 0.371  | -0.608 | 320064    | NA | NR_015486_5_+_1  |
| A930005H10Rik | 1.478  | 0.577  | 1.585  | 1.274  | 0.209  | -0.716 | 0.910  | 0.485  | 0.194  | 0.415  | 68161     | NA | NR_015487_3_-_1  |
| 2900041M22Rik | 2.308  | 2.835  | -4.925 | -4.573 | -4.982 | -4.328 | -4.910 | -2.097 | -3.471 | -2.421 | 78403     | NA | NR_015489_11_+_1 |
| A630089N07Rik | 1.703  | 1.810  | 2.647  | 2.169  | 2.933  | 2.232  | 2.405  | 1.044  | 0.973  | 0.933  | 320586    | NA | NR_015491_16_-_1 |
| C23003516Rik  | -2.647 | -4.981 | -4.510 | -4.897 | -3.477 | -4.800 | -3.154 | -4.652 | -4.981 | -4.981 | 320842    | NA | NR_015492_13_-_1 |
| 2810403D21Rik | 2.242  | 2.202  | -0.094 | -0.615 | 0.735  | -0.092 | 0.781  | 0.207  | 0.404  | 0.259  | 69964     | NA | NR_015493_X_+_1  |
| 4930511M06Rik | -4.436 | -3.994 | -4.706 | -4.864 | -4.793 | -4.934 | -4.563 | -4.901 | -4.465 | -4.765 | 75084     | NA | NR_015494_18_-_1 |
| A230056P14Rik | 0.088  | -3.076 | -2.047 | -4.953 | -1.751 | -3.749 | -2.438 | -2.805 | -0.863 | -3.554 | 320845    | NA | NR_015495_7_+_1  |
| 1500004A13Rik | -0.942 | -0.565 | 0.930  | 0.587  | 0.741  | 0.132  | 0.370  | -0.241 | 0.699  | 0.650  | 319830    | NA | NR_015498_3_-_1  |
| C030034L19Rik | -2.842 | -4.981 | -2.734 | -4.143 | -2.535 | -3.457 | -3.726 | -3.033 | -1.461 | -2.403 | 320088    | NA | NR_015499_3_+_1  |
| A530013C23Rik | -4.981 | -4.981 | -4.776 | -4.765 | -4.980 | -4.980 | -1.866 | -4.694 | -0.992 | -0.896 | 329562    | NA | NR_015500_2_+_1  |
| A330040F15Rik | -3.189 | -4.981 | -4.258 | -3.148 | -3.332 | -3.596 | -1.951 | -2.658 | -0.825 | -2.047 | 74333     | NA | NR_015503_19_-_1 |
| Firre         | 3.900  | 4.158  | 3.190  | 3.374  | 2.454  | 3.274  | 2.616  | 3.208  | 2.875  | 3.466  | 103012    | NA | NR_015505_X_-_1  |
| 4833418N02Rik | 1.279  | 1.571  | 0.939  | 0.980  | 1.524  | 1.984  | 1.723  | 1.313  | 1.425  | 1.756  | 74597     | NA | NR_015506_17_-_1 |
| C130036L24Rik | 1.913  | 1.031  | 0.622  | 0.346  | 0.262  | 0.564  | 0.457  | 0.024  | -1.525 | -1.314 | 319336    | NA | NR_015507_1_+_1  |
| Jpx           | 1.937  | 1.904  | 0.990  | 0.232  | 1.063  | 0.121  | 1.510  | -0.439 | -0.574 | -0.191 | 70252     | NA | NR_015508_X_+_1  |
| 4632427E13Rik | 1.172  | 1.771  | 1.943  | 2.117  | 2.844  | 3.159  | 2.315  | 2.225  | 1.920  | 1.558  | 666737    | NA | NR_015510_7_-_1  |
| E030011O05Rik | -3.189 | -4.981 | -2.244 | -1.727 | -2.430 | -2.526 | -4.338 | -3.992 | -4.981 | -4.981 | 319859    | NA | NR_015511_9_-_1  |
| 9330175E14Rik | -0.251 | -1.093 | 1.174  | 0.887  | -0.351 | -0.447 | 0.166  | -0.205 | 0.089  | 0.798  | 320377    | NA | NR_015514_8_-_1  |
| 6430562O15Rik | -4.981 | -2.767 | -2.540 | -1.688 | -3.196 | -4.245 | -3.587 | -3.800 | -2.179 | -2.280 | 320893    | NA | NR_015515_13_-_1 |
| 4930526I15Rik | 0.616  | 1.123  | 1.209  | 1.239  | 1.235  | 1.567  | 1.451  | 0.536  | 0.149  | 1.361  | 75135     | NA | NR_015516_9_+_1  |
| 5930412G12Rik | -4.981 | -4.981 | -4.959 | -3.041 | -4.268 | -4.001 | -4.964 | -3.820 | -4.981 | -4.981 | 319616    | NA | NR_015517_5_-_1  |
| Al662270      | 8.718  | 8.675  | 7.716  | 7.937  | 6.755  | 6.771  | 6.916  | 7.307  | 6.535  | 6.971  | 100043636 | NA | NR_015519_11_+_1 |
| 1700030C10Rik | -0.400 | -4.981 | -1.280 | -4.810 | -2.232 | -4.805 | -1.457 | -4.733 | 0.171  | -4.981 | 69513     | NA | NR_015521_12_-_1 |
| 2810429I04Rik | -1.888 | -4.981 | -0.237 | -1.196 | 0.473  | 0.458  | -1.344 | -3.333 | -4.981 | -4.342 | 76937     | NA | NR_015522_13_+_1 |
| A730017L22Rik | 1.137  | 1.893  | 0.386  | 0.410  | 0.549  | 0.597  | 0.819  | 0.668  | 0.906  | 1.240  | 613258    | NA | NR_015523_2_-_1  |
| Cep83os       | 3.696  | 3.779  | 2.859  | 2.347  | 3.705  | 3.693  | 2.906  | 2.335  | 2.815  | 2.488  | 67723     | NA | NR_015524_10_-_1 |
| 9430060I03Rik | 0.891  | 1.505  | 0.602  | 0.422  | 1.412  | 2.864  | 1.051  | 0.720  | -0.456 | 0.480  | 100037260 | NA | NR_015525_1_-_1  |
| A830082N09Rik | -3.073 | -1.192 | -3.145 | -2.470 | -3.850 | -3.868 | -3.119 | -4.442 | -2.371 | -2.531 | 414093    | NA | NR_015526_10_-_1 |
| 4930417O13Rik | -3.090 | -4.981 | -3.794 | -3.538 | -4.954 | -4.081 | -4.598 | -4.987 | -3.109 | -4.316 | 73870     | NA | NR_015527_6_+_1  |
| BC029722      | 5.096  | 6.004  | 4.913  | 5.906  | 4.824  | 5.769  | 4.596  | 5.596  | 4.813  | 5.308  | 613262    | NA | NR_015528_2_-_1  |
| R74862        | -1.560 | -4.981 | -0.040 | -0.934 | -1.076 | -2.416 | -1.342 | -1.385 | -4.981 | -4.981 | 97423     | NA | NR_015529_7_-_1  |
| Dancr         | 3.100  | 2.905  | 2.318  | 2.429  | 1.739  | 1.888  | 1.072  | 1.492  | 0.225  | -0.041 | 70036     | NA | NR_015531_5_+_1  |
| 1110038B12Rik | -0.446 | 0.814  | 0.423  | -0.266 | -0.631 | -1.059 | 0.544  | 0.071  | -0.157 | 0.180  | 68763     | NA | NR_015536_17_-_1 |
| 9230114K14Rik | 2.291  | 2.405  | -1.679 | -0.012 | 1.039  | 0.829  | 0.344  | 0.662  | -0.307 | 0.145  | 414108    | NA | NR_015537_5_+_1  |
| Gm2518        | 1.549  | -0.164 | 1.386  | 1.187  | -0.488 | 0.511  | -0.389 | -1.276 | -1.097 | -0.668 | 100039957 | NA | NR_015538_19_+_1 |
| 4933400F21Rik | -4.981 | -4.981 | -1.369 | -2.946 | -0.956 | -1.562 | -2.342 | -2.864 | -2.003 | -1.886 | 74403     | NA | NR_015540_1_-_1  |
| Mir99ahg      | -4.981 | -4.981 | -2.240 | -2.564 | -0.331 | 0.411  | -0.045 | -1.476 | -0.990 | -0.653 | 77994     | NA | NR_015543_16_+_1 |
| 4930481A15Rik | 3.170  | -4.981 | 1.608  | -4.793 | 1.612  | -4.017 | 1.711  | -4.820 | 1.555  | -4.981 | 74931     | NA | NR_015545_19_+_1 |
| 1700009J07Rik | -4.981 | -4.981 | 3.703  | 3.684  | -2.093 | -1.781 | -2.794 | -1.033 | -4.981 | -4.981 | 75188     | NA | NR_015547_10_+_1 |
| 5830432E09Rik | 4.058  | 3.311  | 2.923  | 2.522  | 1.947  | 1.810  | 2.456  | 2.631  | 2.238  | 2.252  | 67765     | NA | NR_015548_7_-_1  |
| Trmt61b       | -3.417 | -3.094 | -2.432 | -4.395 | -4.398 | -4.860 | -4.085 | -4.692 | -3.906 | -4.333 | 68789     | NA | NR_015549_17_-_1 |

|                |        |        |        |        |        |        |        |        |        |        |           |        |                 |
|----------------|--------|--------|--------|--------|--------|--------|--------|--------|--------|--------|-----------|--------|-----------------|
| Rab10os        | 3.629  | 3.711  | 2.812  | 2.575  | 2.989  | 2.728  | 2.857  | 2.804  | 3.078  | 2.592  | 74173     | NA     | NR_015551_12_+1 |
| Al506816       | -4.981 | 2.999  | -4.205 | 2.348  | -4.881 | 1.924  | -4.799 | 1.930  | -4.981 | 0.652  | 433855    | NA     | NR_015554_5_-1  |
| 4933404O12Rik  | 0.416  | 0.769  | -0.310 | 1.139  | 0.878  | 1.556  | 0.745  | 1.677  | -0.328 | 0.262  | 66752     | NA     | NR_015555_5_+1  |
| 2610035D17Rik  | 5.086  | -1.814 | 2.488  | -2.437 | 2.902  | -4.451 | 3.055  | -4.406 | 2.998  | -4.981 | 72386     | NA     | NR_015556_11_-1 |
| 5031425F14Rik  | -0.034 | -2.681 | -0.224 | 0.139  | 1.678  | 2.151  | 1.215  | 1.225  | 0.577  | 0.874  | 319684    | NA     | NR_015558_2_+1  |
| A330023F24Rik  | -0.378 | 0.225  | -3.135 | -2.225 | -0.571 | -0.463 | -0.650 | -0.484 | -0.405 | 0.162  | 320977    | NA     | NR_015566_1_+1  |
| A930007119Rik  | -3.028 | -1.435 | -3.913 | -4.116 | -3.724 | -4.319 | -3.580 | -2.948 | -4.190 | -4.342 | 77779     | NA     | NR_015567_19_-1 |
| 4732471J01Rik  | -2.630 | -2.798 | -1.895 | -2.367 | -1.963 | -1.046 | -1.544 | -2.241 | -0.962 | -3.389 | 654804    | NA     | NR_015569_7_+1  |
| 1810014B01Rik  | 3.264  | 2.760  | 2.108  | 2.023  | 2.704  | 2.550  | 2.482  | 1.864  | 0.886  | 0.867  | 66263     | NA     | NR_015572_10_+1 |
| 1700012D14Rik  | -0.324 | 0.447  | -1.238 | -3.666 | -1.638 | -1.785 | -1.223 | -2.433 | -2.358 | -0.954 | 75479     | NA     | NR_015573_7_-1  |
| 4930513N10Rik  | -1.096 | -0.386 | 0.081  | -0.546 | -0.350 | -1.647 | -1.149 | -2.345 | -1.486 | -1.141 | 319960    | NA     | NR_015574_8_+1  |
| Ube2d-ps       | 3.161  | 3.049  | 2.755  | 3.338  | 2.750  | 3.185  | 3.074  | 3.352  | 2.933  | 3.139  | 76508     | NA     | NR_015577_11_+1 |
| 5430402O13Rik  | -0.829 | 0.196  | -2.865 | -4.027 | -3.556 | -2.727 | -2.019 | -2.534 | -1.974 | -2.609 | 73183     | NA     | NR_015581_6_+1  |
| C330024D21Rik  | -3.691 | -4.981 | -4.180 | -4.178 | -2.669 | -4.333 | -4.060 | -4.748 | -4.981 | -4.227 | 320479    | NA     | NR_015582_5_+1  |
| BC024386       | -3.843 | -2.997 | -3.141 | -3.309 | -3.305 | -3.279 | -3.890 | -4.688 | -4.394 | -3.461 | 212965    | NA     | NR_015583_7_+1  |
| 4933439C10Rik  | 5.549  | 5.222  | 2.971  | 2.549  | 2.527  | 2.269  | 2.184  | 1.961  | 1.961  | 2.181  | 74476     | NA     | NR_015585_11_+1 |
| A330035P11Rik  | 2.384  | 2.126  | 1.957  | 1.806  | 1.050  | 2.230  | 0.543  | 0.283  | -0.643 | -0.519 | 319727    | NA     | NR_015586_14_-1 |
| 9330158H04Rik  | -4.981 | -4.981 | -3.720 | -4.137 | -4.383 | -4.877 | -4.982 | -4.816 | -4.981 | -4.227 | 319472    | NA     | NR_015589_6_-1  |
| 5430405H02Rik  | 2.143  | 1.875  | 2.307  | 1.683  | 1.826  | 0.910  | 1.258  | 1.133  | 1.440  | 0.994  | 74487     | NA     | NR_015591_2_-1  |
| Zfp862-ps      | -2.762 | -1.222 | -1.061 | -0.093 | -0.666 | 0.778  | 0.111  | -0.154 | 0.907  | 2.602  | 58894     | NA     | NR_015597_6_+1  |
| 2810047C21Rik1 | -0.029 | -0.150 | -1.394 | -0.788 | -0.862 | -2.224 | -1.096 | -1.644 | -1.483 | -1.398 | 72716     | NA     | NR_015598_7_-1  |
| A230072E10Rik  | -1.957 | -3.315 | -2.519 | -3.813 | -4.000 | -4.839 | -3.025 | -4.167 | -2.961 | -4.227 | 331547    | NA     | NR_015600_X_-1  |
| Fam120aos      | 4.851  | 4.345  | 3.793  | 3.628  | 3.573  | 3.635  | 3.871  | 3.609  | 3.740  | 3.401  | 68128     | NA     | NR_015601_13_+1 |
| F730043M19Rik  | -1.157 | -1.482 | -0.396 | 0.192  | 2.646  | 3.209  | 1.044  | 0.878  | -1.383 | -0.441 | 320046    | NA     | NR_015602_12_-1 |
| E130112N10Rik  | -0.172 | -0.385 | -0.381 | -0.591 | -0.165 | -0.917 | -1.775 | -0.561 | 0.853  | 0.026  | 78668     | NA     | NR_015604_6_+1  |
| 2900052N01Rik  | 0.387  | -0.497 | -0.908 | 1.041  | 5.258  | 7.091  | 2.815  | 4.376  | -1.885 | -1.066 | 73040     | NA     | NR_015605_9_+1  |
| Ppp1r12b       | 2.736  | 1.514  | 2.631  | 2.335  | 2.149  | 2.030  | 0.943  | 0.377  | -0.685 | -0.682 | 329251    | NA     | NR_015606_1_-1  |
| 1810058I24Rik  | 7.173  | 7.109  | 6.651  | 6.517  | 6.199  | 6.392  | 6.428  | 6.356  | 6.001  | 5.728  | 67705     | NA     | NR_015608_6_+1  |
| 9530059O14Rik  | -4.981 | -4.981 | 3.680  | 3.646  | 3.046  | 3.541  | 1.734  | 1.972  | -4.981 | -4.981 | 319626    | NA     | NR_015610_9_+1  |
| Hoxaa3         | 0.843  | 0.358  | -3.023 | -3.246 | -1.627 | -1.779 | -4.177 | -4.910 | -4.394 | -3.210 | 72628     | NA     | NR_015611_6_+1  |
| 4732416N19Rik  | -3.025 | -4.981 | -4.213 | -4.312 | -3.891 | -4.364 | -4.458 | -4.958 | -3.823 | -4.981 | 320737    | NA     | NR_015615_6_+1  |
| A930015D03Rik  | 3.341  | 3.370  | 2.439  | 2.590  | 3.032  | 2.972  | 2.603  | 2.249  | 2.136  | 1.531  | 77810     | NA     | NR_015618_17_+1 |
| Adarb1         | -4.116 | -3.057 | -4.522 | -4.149 | -4.042 | -4.398 | -3.751 | -4.260 | -4.509 | -3.298 | 110532    | ADARB1 | NR_021486_10_-1 |
| Gm6981         | -3.248 | -1.868 | -2.699 | -3.575 | -1.435 | -3.234 | -2.613 | -4.494 | -0.642 | -0.910 | 629557    | NA     | NR_023357_9_-1  |
| 4930594C11Rik  | 0.832  | 1.534  | -0.509 | -1.167 | 1.762  | 1.024  | 0.622  | -0.621 | -3.153 | -0.927 | 77633     | NA     | NR_024017_1_-1  |
| Mtmr2          | 2.810  | 2.691  | 3.187  | 3.259  | 2.575  | 1.984  | 2.885  | 2.787  | 3.614  | 3.807  | 77116     | MTMR2  | NR_024025_9_+1  |
| Snhg6          | 3.272  | 2.818  | 4.236  | 2.787  | 3.533  | 2.484  | 3.725  | 2.598  | 2.437  | 1.377  | 73824     | NA     | NR_024067_1_-1  |
| Snhg7          | 0.727  | -0.053 | 0.574  | 0.462  | -0.401 | -1.955 | -0.447 | -0.831 | -1.646 | -0.493 | 72091     | NA     | NR_024068_2_-1  |
| Btbtd19        | 2.675  | 2.624  | 2.135  | 2.591  | 3.264  | 3.712  | 3.083  | 3.391  | 2.587  | 2.189  | 78611     | NA     | NR_024078_4_-1  |
| Gm44505        | 2.898  | 3.318  | 3.161  | 2.577  | 2.376  | 2.556  | 2.036  | 1.650  | -0.758 | -1.247 | 664779    | NA     | NR_024093_19_-1 |
| Gm14057        | -1.577 | -2.997 | -0.631 | -4.059 | -2.515 | -3.682 | -1.788 | -3.175 | -0.562 | -3.142 | 100043766 | NA     | NR_024097_2_-1  |
| Prmt6          | 2.769  | 3.184  | 2.609  | 2.814  | 2.665  | 2.534  | 2.419  | 2.320  | 2.907  | 3.094  | 99890     | PRMT6  | NR_024139_3_-1  |
| Klrb1f         | 0.987  | -4.981 | -1.368 | -3.373 | 2.465  | 1.842  | 1.075  | -0.302 | 1.042  | 1.762  | 232408    | NA     | NR_024262_6_+1  |
| Klrb1f         | 0.677  | -4.843 | -4.647 | -2.475 | 0.153  | 0.191  | -1.093 | -3.395 | 1.161  | -1.128 | 232408    | NA     | NR_024263_6_+1  |
| 4930426L09Rik  | 0.717  | 1.831  | 0.942  | 1.232  | 0.837  | 1.621  | 0.472  | -0.111 | 0.022  | -0.053 | 74629     | NA     | NR_024323_2_+1  |
| 9130024F11Rik  | -3.843 | -2.275 | -3.478 | -3.906 | -4.318 | -4.803 | -3.204 | -4.568 | -4.981 | -2.763 | 329160    | NA     | NR_024325_1_+1  |
| Cnot2          | 1.259  | -0.354 | -1.111 | 0.679  | 1.373  | 0.420  | 1.435  | -0.173 | -1.451 | 1.301  | 72068     | CNOT2  | NR_024327_10_-1 |
| 9230116N13Rik  | 2.744  | 2.265  | 0.112  | 0.095  | 0.534  | 0.959  | 1.590  | 0.765  | 0.588  | 0.848  | 320054    | NA     | NR_024328_1_-1  |
| 2900097C17Rik  | 6.491  | 6.373  | 7.147  | 6.770  | 7.083  | 6.642  | 7.337  | 6.706  | 7.138  | 7.316  | 347740    | NA     | NR_024329_2_-1  |
| 1700008J07Rik  | 2.729  | 2.482  | 1.154  | 1.035  | 1.208  | 0.656  | 0.811  | 0.467  | 1.277  | 1.173  | 629159    | NA     | NR_024331_7_-1  |
| Uqcc1          | 0.539  | 1.073  | 0.701  | 0.106  | 0.854  | -0.131 | 0.963  | 0.081  | 0.755  | 1.042  | 56046     | UQCC1  | NR_024487_2_-1  |
| Tmem80         | 2.924  | 2.495  | 2.383  | 2.517  | 1.881  | 1.911  | 2.016  | 1.620  | 1.032  | 1.251  | 71448     | TMEM80 | NR_024509_7_+1  |
| Gm11166        | -4.981 | -4.981 | -4.943 | -3.675 | -4.933 | -2.258 | -3.620 | -4.702 | -4.981 | -4.981 | 625850    | NA     | NR_024558_17_-1 |
| Nemp2          | 4.686  | 4.774  | 3.401  | 3.117  | 3.713  | 3.896  | 3.181  | 2.697  | 3.188  | 3.005  | 227094    | NEMP2  | NR_024590_1_+1  |
| Gm11346        | 4.244  | 0.144  | -1.128 | -2.947 | 0.780  | -2.014 | -0.056 | -2.087 | -2.045 | -2.382 | 76024     | NA     | NR_024599_13_-1 |
| 2610001J05Rik  | 7.637  | 7.695  | 6.751  | 6.751  | 6.593  | 6.838  | 6.506  | 6.616  | 5.775  | 5.951  | 66520     | NA     | NR_024619_6_-1  |
| 2700099C18Rik  | 4.281  | 4.000  | 1.381  | 1.449  | 2.130  | 1.941  | 1.926  | 0.806  | -0.644 | -2.240 | 77022     | NA     | NR_024720_17_+1 |
| Gm14379        | -2.105 | -2.583 | -4.952 | -1.533 | -4.390 | -1.595 | -1.612 | -2.619 | -1.755 | -1.891 | 100270707 | NA     | NR_026741_X_+1  |
| Zfp389         | -2.573 | -3.315 | -4.640 | -3.978 | -4.797 | -4.593 | -4.716 | -4.713 | -4.981 | -3.758 | 100038371 | NA     | NR_026798_13_-1 |
| Bach2os        | -1.418 | -1.254 | -3.429 | -2.895 | -3.031 | -4.329 | -1.468 | -3.029 | -2.091 | -2.078 | 414068    | NA     | NR_026843_4_-1  |
| C030034I22Rik  | 3.322  | 3.450  | 2.524  | 2.321  | 2.831  | 3.166  | 2.927  | 2.964  | 1.974  | 2.500  | 77533     | NA     | NR_026848_17_+1 |
| A930012L18Rik  | -4.981 | -2.997 | -4.962 | -4.962 | -3.752 | -3.798 | -4.548 | -4.764 | -4.981 | -4.981 | 626275    | NA     | NR_026853_18_+1 |
| 1700020N18Rik  | -2.494 | -4.981 | -2.895 | -5.009 | -2.798 | -3.710 | -4.511 | -4.898 | -4.981 | -4.981 | 67086     | NA     | NR_026924_1_-1  |
| E330013P04Rik  | -4.981 | -4.981 | -4.960 | -4.960 | -4.659 | -4.843 | -4.981 | -4.981 | -4.981 | -4.981 | 107376    | NA     | NR_026942_19_+1 |
| Gm10941        | -2.105 | -1.901 | -2.803 | -2.549 | -3.361 | -3.187 | -4.712 | -2.815 | -1.767 | -0.620 | 100169878 | NA     | NR_026944_10_-1 |
| Gm5577         | -4.981 | -4.981 | -4.907 | -4.167 | -4.285 | -4.935 | -4.801 | -4.779 | -4.981 | -4.981 | 434064    | NA     | NR_026990_6_+1  |
| Gt(ROSA)26Sor  | 3.621  | 4.123  | 2.069  | 1.593  | 1.499  | 1.310  | 1.659  | 1.654  | 0.977  | 0.925  | 14910     | NA     | NR_027008_6_-1  |
| Gt(ROSA)26Sor  | 6.297  | 5.587  | 4.853  | 4.682  | 4.228  | 4.031  | 4.439  | 4.330  | 3.503  | 4.113  | 14910     | NA     | NR_027009_6_-1  |
| Gt(ROSA)26Sor  | 1.224  | 2.482  | 1.770  | 1.899  | 0.971  | 0.645  | 1.612  | 0.942  | 0.475  | 0.184  | 14910     | NA     | NR_027010_6_-1  |
| Snhg20         | 5.604  | 5.094  | 4.925  | 4.519  | 5.228  | 5.453  | 5.443  | 5.178  | 4.049  | 3.737  | 76972     | NA     | NR_027059_11_+1 |
| Tmem51os1      | -1.217 | -4.981 | 0.066  | -0.046 | -0.014 | 0.024  | 0.750  | 0.986  | 1.488  | 1.655  | 100038693 | NA     | NR_027137_4_+1  |
| Al854703       | 1.366  | 0.099  | -1.638 | -1.297 | -2.018 | 0.309  | -2.026 | -0.753 | -2.679 | -4.981 | 243373    | NA     | NR_027236_6_+1  |
| Uckl1os        | 1.248  | 1.230  | 0.519  | 0.003  | 0.263  | 0.672  | 0.107  | -0.626 | 0.388  | -0.156 | 100271841 | NA     | NR_027290_2_+1  |
| A230020J21Rik  | -4.981 | -2.860 | -2.123 | -2.809 | 0.702  | -0.005 | -0.528 | -2.479 | -1.476 | -2.960 | 100125339 | NA     | NR_027298_1_+1  |

|                |        |        |        |        |        |        |        |        |        |        |               |          |                 |
|----------------|--------|--------|--------|--------|--------|--------|--------|--------|--------|--------|---------------|----------|-----------------|
| Pdkx-ps        | -3.668 | -4.981 | -4.915 | -4.915 | -2.892 | -3.179 | -4.968 | -2.961 | -3.109 | -3.797 | 435518        | NA       | NR_027316_17_-1 |
| Gorasp2        | 2.568  | 2.489  | 2.515  | 3.159  | 1.199  | 1.975  | 1.612  | 2.686  | 3.968  | 3.987  | 70231         | GORASP2  | NR_027343_2_+1  |
| Trpt1          | 0.555  | -0.410 | -1.902 | -2.244 | -1.223 | -1.544 | -3.761 | -1.914 | -0.945 | -3.878 | 107328        | TRPT1    | NR_027351_19_+1 |
| Vash2          | -2.714 | -0.674 | -2.253 | -2.653 | -2.187 | -3.820 | -1.666 | -2.255 | -3.185 | -1.900 | 226841        | VASH2    | NR_027352_1_-1  |
| Record_removed | 6.245  | 8.918  | 4.436  | 4.526  | 3.939  | 3.914  | 3.737  | 3.904  | 3.456  | 3.681  | Record_remove | NA       | NR_027359_6_-1  |
| Record_removed | 5.199  | 7.708  | 2.850  | 2.660  | 2.484  | 2.480  | 1.833  | 3.070  | 2.341  | 2.676  | Record_remove | NA       | NR_027360_6_-1  |
| Arhgap1        | 2.460  | 2.853  | 4.492  | 4.485  | 4.770  | 3.639  | 3.721  | 3.921  | 4.678  | 4.613  | 228359        | ARHGAP1  | NR_027371_2_+1  |
| Arhgap1        | 4.778  | 4.602  | 5.740  | 5.925  | 6.034  | 6.221  | 5.961  | 5.459  | 6.025  | 5.814  | 228359        | ARHGAP1  | NR_027372_2_+1  |
| Arhgap1        | 2.188  | 2.675  | 2.163  | 3.178  | 3.425  | 3.305  | 2.222  | 2.931  | 3.102  | 3.298  | 228359        | ARHGAP1  | NR_027373_2_+1  |
| Ythdf3         | 0.879  | 1.987  | 0.105  | 2.361  | 1.476  | 1.203  | 1.730  | 0.342  | 3.449  | 3.611  | 229096        | YTHDF3   | NR_027375_3_+1  |
| Gm5468         | -4.981 | -2.060 | -4.767 | -3.420 | -3.576 | -3.939 | -4.731 | -4.320 | -4.981 | -4.981 | 432939        | NA       | NR_027376_15_+1 |
| Gm17769        | -4.981 | -4.981 | -4.937 | -4.937 | -3.348 | -3.669 | -4.212 | -4.978 | -4.981 | -4.981 | 100045653     | NA       | NR_027377_10_+1 |
| Gm3219         | 1.408  | 1.485  | 1.115  | 1.615  | 0.920  | 1.337  | 1.196  | 1.870  | 1.975  | 2.862  | 100041231     | NA       | NR_027380_14_+1 |
| 1700096K18Rik  | 4.974  | 4.718  | 2.774  | 2.756  | 2.925  | 3.091  | 3.150  | 2.535  | 2.989  | 2.792  | 73571         | NA       | NR_027388_5_+1  |
| Rnf44          | 0.024  | -0.988 | 2.661  | 2.956  | 3.130  | 2.234  | 3.232  | 0.493  | 2.164  | 2.512  | 105239        | RNF44    | NR_027395_13_-1 |
| Rnf44          | 3.586  | 1.816  | 4.171  | 4.232  | 4.157  | 4.063  | 3.826  | 3.019  | 3.954  | 4.101  | 105239        | RNF44    | NR_027396_13_-1 |
| Fbxo34         | -0.228 | -0.110 | 1.039  | 0.784  | -0.738 | -0.246 | 0.061  | -0.848 | 0.542  | 1.463  | 78938         | FBXO34   | NR_027414_14_+1 |
| A230072C01Rik  | 1.447  | 0.514  | -1.618 | -0.902 | -0.190 | -0.230 | -0.519 | 0.449  | -1.320 | 0.257  | 320742        | NA       | NR_027445_X_+1  |
| A230072C01Rik  | 1.630  | 1.902  | 0.554  | 0.152  | 1.122  | 1.241  | 0.318  | 0.036  | 0.436  | -0.360 | 320742        | NA       | NR_027446_X_+1  |
| AA543186       | -0.391 | -0.110 | 0.266  | -0.009 | -0.437 | -0.069 | -1.273 | -1.058 | -1.451 | -1.660 | 100272219     | NA       | NR_027448_2_-1  |
| Gm17801        | -2.616 | -2.471 | -2.714 | -3.307 | -3.710 | -4.254 | -3.466 | -4.818 | -1.848 | -3.278 | 100272221     | NA       | NR_027452_17_+1 |
| Chpt1          | 3.146  | 3.375  | 2.007  | 2.203  | 0.790  | 1.590  | 1.532  | 2.087  | 2.902  | 2.244  | 212862        | CHPT1    | NR_027477_10_-1 |
| Gm8580         | -3.521 | -0.492 | -2.609 | -0.453 | -4.049 | -0.836 | -3.302 | -0.355 | -4.238 | -0.593 | 667338        | NA       | NR_027478_10_-1 |
| Psm2           | 1.015  | -3.214 | 1.083  | 1.545  | -0.876 | -0.139 | 0.191  | -0.261 | 1.619  | 0.675  | 21762         | PSMD2    | NR_027485_16_+1 |
| Senp2          | 0.716  | 1.169  | 1.845  | 2.839  | 2.976  | 2.905  | 3.140  | 3.033  | 2.360  | 3.639  | 75826         | SENP2    | NR_027488_16_+1 |
| Il4            | -4.981 | -4.981 | -4.058 | -4.166 | -4.648 | -4.949 | -0.091 | -3.731 | -4.981 | -4.981 | 16189         | IL4      | NR_027491_11_-1 |
| Hspa13         | 1.766  | 2.441  | 1.080  | 0.391  | 0.855  | 0.915  | 0.869  | 1.133  | 1.752  | 1.852  | 110920        | HSPA13   | NR_027492_16_-1 |
| Pknox1         | 2.738  | 3.618  | 1.972  | 2.671  | 2.745  | 2.429  | 2.613  | 2.823  | 3.756  | 4.115  | 18771         | PKNOX1   | NR_027493_17_+1 |
| Zc3h7a         | 5.528  | 5.670  | 5.654  | 5.376  | 5.144  | 5.285  | 5.217  | 5.041  | 4.838  | 5.029  | 106205        | ZC3H7A   | NR_027502_16_-1 |
| Rnf126         | -1.480 | -1.225 | -0.247 | -1.685 | -1.049 | -1.938 | -0.620 | -2.233 | -0.687 | -0.085 | 70294         | RNF126   | NR_027505_10_-1 |
| Suv39h2        | 2.049  | 2.376  | 0.620  | 1.877  | 1.460  | 1.019  | 0.928  | 0.290  | 0.999  | -0.406 | 64707         | SUV39H2  | NR_027509_2_-1  |
| Lrrc57         | 2.724  | 2.099  | 3.090  | 2.004  | 2.406  | 1.158  | 2.947  | 1.652  | 2.585  | 2.374  | 66606         | LRRCS7   | NR_027510_2_-1  |
| Rbm18          | 2.914  | -3.848 | 1.687  | -4.755 | 1.522  | -2.532 | 1.735  | -4.824 | 2.413  | -4.497 | 67889         | RBM18    | NR_027515_2_-1  |
| Vps39          | 1.530  | 1.337  | -1.503 | -2.371 | -1.762 | -2.221 | -0.450 | -1.229 | -3.584 | -0.121 | 269338        | VPS39    | NR_027618_2_-1  |
| Kctd18         | 2.455  | 2.423  | 1.951  | 1.799  | 2.504  | 1.966  | 0.974  | 1.100  | 2.556  | 1.982  | 51960         | KCTD18   | NR_027630_1_-1  |
| Ralgs2         | 2.277  | 1.226  | -1.044 | 1.083  | -1.534 | 0.620  | -0.045 | 1.986  | 1.098  | 0.606  | 78255         | RALGPS2  | NR_027640_1_-1  |
| Sec16b         | -4.981 | -2.828 | -4.891 | -4.880 | -4.711 | -4.919 | -4.338 | -4.492 | -3.533 | -2.461 | 89867         | SEC16B   | NR_027641_1_+1  |
| Vsig8          | -4.981 | -4.981 | -4.927 | -3.762 | -3.468 | -4.090 | -3.464 | -4.169 | -3.925 | -4.981 | 240916        | VSIG8    | NR_027644_1_+1  |
| Zc3h14         | 2.003  | 1.819  | 1.200  | 1.555  | 1.612  | 1.013  | 1.009  | 0.786  | 1.258  | 1.339  | 75553         | ZC3H14   | NR_027648_12_+1 |
| Meg3           | -4.981 | -2.737 | -3.687 | -3.790 | -4.925 | -2.405 | -4.940 | -4.912 | -4.981 | -4.981 | 17263         | NA       | NR_027651_12_+1 |
| Meg3           | -2.178 | -3.019 | -4.103 | -1.954 | -4.928 | -0.870 | -4.992 | -4.218 | -4.981 | -3.181 | 17263         | NA       | NR_027652_12_+1 |
| Oaz1-ps        | 9.463  | 9.440  | 8.818  | 9.182  | 8.581  | 8.764  | 8.190  | 8.870  | 8.337  | 8.031  | 100041965     | NA       | NR_027656_10_+1 |
| Adhfe1         | -0.287 | -4.981 | -4.209 | -4.995 | -3.666 | -4.831 | -3.098 | -2.875 | -1.197 | -2.330 | 76187         | ADHFE1   | NR_027664_1_+1  |
| Fcrla          | 5.207  | 2.671  | 2.928  | -1.074 | -2.327 | -2.597 | -0.479 | -2.381 | -1.762 | -4.560 | 98752         | FCRLA    | NR_027666_1_-1  |
| Pum2           | -4.025 | -3.611 | -2.984 | -4.527 | -4.343 | -4.784 | -4.378 | -4.813 | -3.938 | -4.642 | 80913         | PUM2     | NR_027670_12_+1 |
| E2f6           | 1.861  | 3.475  | 2.766  | 2.839  | 2.707  | 2.797  | 1.986  | 2.433  | 2.668  | 3.627  | 50496         | E2F6     | NR_027677_12_+1 |
| Serp2          | 2.083  | 2.102  | -3.951 | -4.866 | -3.836 | -3.582 | -4.953 | -4.296 | -4.981 | -4.981 | 72661         | SERP2    | NR_027699_14_-1 |
| Svip           | -3.890 | -3.426 | -1.444 | -1.495 | -4.120 | -1.957 | -4.488 | -1.389 | -3.973 | 2.341  | 75744         | SVIP     | NR_027704_7_-1  |
| Ppargc1a       | -2.637 | -4.981 | -4.314 | -4.957 | -1.046 | 0.622  | -4.193 | -4.978 | -4.508 | -4.981 | 19017         | PPARGC1A | NR_027710_5_-1  |
| Dctd           | -1.168 | 0.689  | -0.616 | -0.870 | -2.089 | -0.184 | -2.761 | 0.033  | -1.961 | -4.981 | 320685        | DCTD     | NR_027759_8_+1  |
| Hgd            | -4.981 | -4.981 | -1.406 | -0.985 | 0.855  | -0.255 | -1.614 | -3.528 | -4.394 | -4.981 | 15233         | HGD      | NR_027778_16_+1 |
| Airn           | -4.981 | -4.981 | -4.981 | -4.979 | -4.963 | -4.582 | -4.980 | -4.980 | -4.981 | -4.977 | 104103        | NA       | NR_027784_17_+1 |
| Polg2          | 3.021  | 2.958  | 2.345  | 2.122  | 2.809  | 2.897  | 2.427  | 2.534  | 2.328  | 2.395  | 50776         | POLG2    | NR_027785_11_-1 |
| Tbrg3          | 1.907  | 1.815  | 1.970  | 2.179  | 2.713  | 2.595  | 2.167  | 1.450  | 1.656  | 1.561  | 21378         | NA       | NR_027799_15_-1 |
| Map2k3os       | 0.142  | -0.699 | -0.034 | -0.344 | -1.094 | -1.718 | -1.410 | -1.040 | -1.169 | -0.345 | 24082         | NA       | NR_027800_11_-1 |
| Gm1141         | -4.981 | -2.239 | -3.233 | -4.820 | -4.867 | -4.638 | -4.958 | -4.941 | -4.981 | -2.391 | 382221        | NA       | NR_027801_X_+1  |
| Mtag2          | -4.981 | -4.428 | -4.751 | -4.956 | -4.518 | -4.438 | -3.661 | -3.922 | -4.981 | -4.981 | 50994         | NA       | NR_027802_7_+1  |
| D6Ert474e      | -4.981 | -4.981 | -3.011 | -4.573 | -2.029 | -4.308 | -0.809 | -2.131 | -4.981 | -4.981 | 52285         | NA       | NR_027803_6_+1  |
| Nagpa          | 1.924  | 1.749  | 1.958  | 2.030  | 2.797  | 3.011  | 2.761  | 2.538  | 3.370  | 3.653  | 27426         | NAGPA    | NR_027804_16_-1 |
| A430093F15Rik  | -1.433 | -2.895 | -1.174 | -1.616 | -0.625 | -0.875 | -1.601 | 0.171  | 1.220  | 0.933  | 403202        | NA       | NR_027805_19_+1 |
| Zfp862-ps      | -0.082 | 1.551  | -0.315 | -0.464 | 1.174  | 1.097  | 0.013  | -0.056 | 1.137  | 1.230  | 58894         | NA       | NR_027808_6_+1  |
| Mthfr          | 2.467  | 1.242  | 0.362  | 1.162  | -0.446 | 0.075  | 0.179  | 0.107  | 1.721  | 0.755  | 17769         | MTHFR    | NR_027809_4_+1  |
| 1110006O24Rik  | 1.524  | 1.447  | 1.338  | 0.802  | 0.492  | 1.108  | 0.550  | 0.382  | -0.210 | -0.378 | 66123         | NA       | NR_027810_5_-1  |
| 1500011B03Rik  | 4.734  | 4.073  | 4.477  | 4.046  | 3.993  | 3.875  | 3.720  | 3.478  | 3.689  | 3.334  | 66236         | NA       | NR_027817_5_-1  |
| 1500011B03Rik  | 5.155  | 6.117  | 3.975  | 5.239  | 3.075  | 4.863  | 3.455  | 5.229  | 3.808  | 4.542  | 66236         | NA       | NR_027818_5_-1  |
| 1810032O08Rik  | 3.139  | 2.919  | 2.898  | 2.661  | 2.614  | 3.225  | 2.586  | 3.120  | 1.424  | 2.209  | 66293         | NA       | NR_027819_11_+1 |
| 1810032O08Rik  | -0.969 | -1.523 | -1.319 | -3.743 | -0.631 | -2.515 | -3.769 | -4.673 | -4.736 | -4.981 | 66293         | NA       | NR_027820_11_+1 |
| 1810032O08Rik  | 1.835  | 1.998  | 2.544  | 3.136  | 2.175  | 3.488  | 1.758  | 3.038  | 1.130  | 1.995  | 66293         | NA       | NR_027821_11_+1 |
| Chd3os         | 3.599  | 3.451  | 3.189  | 3.469  | 3.163  | 2.990  | 2.789  | 2.440  | -0.177 | 0.821  | 80515         | NA       | NR_027827_11_+1 |
| Gm10638        | -0.225 | 0.047  | -1.465 | -2.685 | -1.599 | -2.295 | -2.084 | -2.108 | -1.152 | -1.321 | 666945        | NA       | NR_027829_8_+1  |
| 2810002D19Rik  | 4.177  | 2.891  | 2.641  | 1.485  | 3.503  | 2.334  | 2.983  | 2.235  | 2.863  | 2.182  | 66457         | NA       | NR_027831_2_+1  |
| 1700020I14Rik  | 3.140  | 3.173  | 3.111  | 2.581  | 3.078  | 2.724  | 2.908  | 2.249  | 2.259  | 2.194  | 66602         | NA       | NR_027832_2_+1  |
| D730001G18Rik  | -4.573 | -1.088 | -4.978 | -4.978 | -4.981 | -4.980 | -4.978 | -4.976 | -4.981 | -4.981 | 78725         | NA       | NR_027836_15_-1 |
| D730001G18Rik  | -2.205 | -3.722 | -4.931 | -4.931 | -4.973 | -4.693 | -4.963 | -4.949 | -4.981 | -4.981 | 78725         | NA       | NR_027837_15_-1 |

|               |        |        |        |        |        |        |        |        |        |        |           |        |                 |
|---------------|--------|--------|--------|--------|--------|--------|--------|--------|--------|--------|-----------|--------|-----------------|
| Atp2a2        | 4.808  | 4.585  | 3.952  | 4.239  | 4.119  | 4.495  | 4.250  | 4.220  | 3.708  | 4.283  | 11938     | ATP2A2 | NR_027838_5_-1  |
| Pex11b        | 0.689  | -0.127 | 0.139  | 1.169  | 0.496  | 1.196  | 1.563  | 1.221  | 1.043  | -0.274 | 18632     | PEX11B | NR_027844_3_+1  |
| Pex11b        | 3.478  | 3.591  | 3.383  | 2.674  | 2.631  | 1.926  | 2.670  | 2.669  | 2.805  | 2.948  | 18632     | PEX11B | NR_027845_3_+1  |
| D630029K05Rik | -4.981 | -4.981 | -4.968 | -2.653 | -4.965 | -4.036 | -4.193 | -3.403 | -4.981 | -3.855 | 103175    | NA     | NR_027846_10_+1 |
| D630029K05Rik | -4.981 | -4.981 | -4.972 | -4.896 | -4.964 | -4.954 | -4.933 | -4.964 | -4.981 | -4.879 | 103175    | NA     | NR_027847_10_+1 |
| 2900005J15Rik | 2.991  | 3.112  | 2.165  | 2.447  | 2.831  | 2.597  | 2.662  | 2.535  | 2.481  | 2.129  | 67261     | NA     | NR_027851_5_+1  |
| Cd40          | 0.247  | -1.855 | 3.505  | 3.030  | 3.998  | 3.261  | 3.458  | 2.257  | 2.337  | 2.530  | 21939     | CD40   | NR_027852_2_+1  |
| Clk1          | 6.676  | 7.259  | 5.131  | 5.379  | 6.313  | 6.659  | 5.950  | 5.814  | 5.266  | 5.131  | 12747     | CLK1   | NR_027853_1_-1  |
| Clk1          | 5.040  | 5.762  | 6.436  | 5.921  | 6.254  | 5.977  | 6.081  | 6.055  | 6.240  | 6.340  | 12747     | CLK1   | NR_027854_1_-1  |
| Nkx6-2        | -4.981 | -2.465 | -4.981 | -4.981 | -4.833 | -4.737 | -4.516 | -4.751 | -2.042 | -3.274 | 14912     | NKX6-2 | NR_027857_7_-1  |
| Nlrp1c-ps     | -2.030 | -4.981 | 4.127  | -4.141 | 3.014  | -4.712 | 2.677  | -4.477 | 2.765  | -3.275 | 627984    | NA     | NR_027858_11_-1 |
| Pfkfb2        | -4.738 | -4.351 | -0.086 | -1.235 | -1.476 | -0.315 | -2.740 | -3.043 | 0.470  | 1.243  | 18640     | PFKFB2 | NR_027859_1_-1  |
| Gm9199        | -2.585 | -2.063 | -0.004 | -2.721 | -1.821 | -2.215 | -1.959 | -2.772 | -1.841 | -4.981 | 668489    | NA     | NR_027860_14_+1 |
| Tardbp        | 4.130  | 4.197  | 3.768  | 3.582  | 3.428  | 3.507  | 3.461  | 3.360  | 2.937  | 2.890  | 230908    | TARDBP | NR_027864_4_-1  |
| 5730408K05Rik | 0.771  | 1.238  | 1.345  | 1.406  | 1.490  | 1.618  | 1.818  | 1.823  | 1.730  | 1.516  | 67531     | NA     | NR_027866_19_-1 |
| Dtnb          | -4.567 | -4.402 | -3.577 | -3.747 | -3.186 | -2.917 | -3.474 | -4.823 | -4.485 | -4.948 | 13528     | DTNB   | NR_027869_12_+1 |
| Dtnb          | 2.889  | 2.362  | 3.407  | 2.823  | 2.180  | 1.479  | 1.477  | 1.267  | 0.321  | 0.666  | 13528     | DTNB   | NR_027870_12_+1 |
| 4930515G01Rik | 2.469  | 2.216  | 1.594  | 1.248  | 1.185  | 1.137  | 1.053  | -0.084 | 0.216  | 0.073  | 67642     | NA     | NR_027872_5_-1  |
| 0610040B10Rik | 1.646  | 2.120  | 0.379  | -0.313 | -0.224 | -0.686 | -0.449 | -1.106 | -0.209 | -1.513 | 67672     | NA     | NR_027874_5_+1  |
| 1810058I24Rik | 4.126  | 4.522  | 3.456  | 3.643  | 2.749  | 3.063  | 3.199  | 3.324  | 3.350  | 3.055  | 67705     | NA     | NR_027875_6_+1  |
| Arrdc1        | 5.748  | 6.015  | 5.820  | 5.703  | 6.148  | 6.114  | 5.856  | 5.788  | 5.782  | 5.711  | 215705    | ARRDC1 | NR_027876_2_-1  |
| 4930583K01Rik | -0.415 | -4.981 | -3.725 | -4.176 | -3.274 | -3.357 | -3.972 | -4.309 | -3.373 | -4.316 | 67745     | NA     | NR_027879_7_+1  |
| Vaultrc5      | -0.612 | 0.192  | 0.293  | -0.013 | 0.069  | 0.782  | 0.627  | -0.486 | -0.036 | 0.211  | 378472    | NA     | NR_027885_18_+1 |
| A930013F10Rik | 3.064  | 2.989  | 2.489  | 2.146  | 3.677  | 3.488  | 3.054  | 2.568  | 2.753  | 2.425  | 68074     | NA     | NR_027886_8_-1  |
| Snhg17        | 2.552  | 3.334  | 2.642  | 2.291  | 2.667  | 2.906  | 2.104  | 2.406  | 0.326  | 0.794  | 68108     | NA     | NR_027887_2_-1  |
| Sqrdl         | 1.079  | 2.014  | 1.210  | 1.600  | 0.621  | 0.741  | 3.753  | 3.710  | 5.263  | 5.720  | 59010     | SQRDL  | NR_027888_2_+1  |
| 5031426D15Rik | -4.981 | -4.981 | -3.730 | -4.499 | -3.598 | -4.527 | -4.473 | -4.721 | -3.009 | -3.781 | 68144     | NA     | NR_027890_2_-1  |
| 5430402O13Rik | 0.086  | -0.313 | -3.779 | -1.407 | -1.210 | -2.532 | -0.370 | -2.944 | -0.748 | -2.228 | 73183     | NA     | NR_027892_6_+1  |
| A930005H10Rik | 2.137  | 2.261  | 3.083  | 3.404  | 1.395  | 2.099  | 2.110  | 2.802  | 1.058  | 1.226  | 68161     | NA     | NR_027894_3_-1  |
| A930005H10Rik | -2.176 | -1.309 | 1.104  | 1.047  | 0.637  | 0.910  | -0.512 | 0.234  | -0.299 | -1.991 | 68161     | NA     | NR_027895_3_-1  |
| 0610012G03Rik | 6.165  | 5.929  | 5.382  | 5.526  | 5.178  | 5.271  | 5.804  | 5.776  | 5.271  | 5.300  | 106264    | NA     | NR_027897_16_-1 |
| Snhg9         | 1.521  | 1.006  | 1.211  | -0.539 | 1.513  | 0.011  | 1.371  | -0.239 | 0.970  | 0.044  | 73474     | NA     | NR_027900_17_-1 |
| 2900060B14Rik | 2.557  | 3.332  | 2.261  | 2.230  | 3.114  | 3.885  | 2.665  | 2.499  | 1.369  | 1.831  | 68204     | NA     | NR_027901_1_-1  |
| 1700080O06Rik | 0.070  | -1.331 | -0.228 | -1.435 | -1.005 | -0.065 | -0.712 | -1.568 | -1.191 | -2.013 | 73516     | NA     | NR_027903_18_-1 |
| 1700080O06Rik | -3.178 | -0.963 | -1.592 | -3.441 | -1.432 | -2.458 | -1.956 | -4.406 | -2.604 | -4.981 | 73516     | NA     | NR_027904_18_-1 |
| LOC106740     | 0.772  | 1.413  | 2.389  | 1.817  | 1.364  | 1.043  | 0.958  | 0.865  | 1.554  | 1.487  | 106740    | NA     | NR_027905_17_-1 |
| Igsf9b        | -4.981 | -4.981 | -4.955 | -4.329 | -4.612 | -2.560 | -4.966 | -4.952 | -4.981 | -4.981 | 235086    | IGSF9B | NR_027907_9_+1  |
| G630025P09Rik | -4.981 | -4.981 | -2.839 | -0.472 | -4.777 | -4.751 | -4.260 | -3.279 | -4.981 | -3.299 | 74341     | NA     | NR_027913_11_+1 |
| 5430405H02Rik | 2.934  | 3.168  | 2.808  | 2.457  | 2.320  | 2.320  | 2.019  | 2.162  | 1.784  | 1.518  | 74487     | NA     | NR_027914_2_-1  |
| 1700120K04Rik | -4.981 | -2.060 | -2.737 | -2.827 | -3.174 | -3.472 | -2.716 | -2.342 | -1.840 | -1.100 | 68232     | NA     | NR_027915_7_-1  |
| Bambi-ps1     | -0.241 | 1.433  | -1.165 | -1.310 | -2.733 | -3.017 | -0.125 | 0.301  | 1.419  | 1.081  | 81913     | NA     | NR_027919_2_-1  |
| C630043F03Rik | 1.738  | 1.185  | 1.484  | 0.932  | 1.082  | 1.669  | 1.783  | 1.632  | 0.442  | 0.471  | 68285     | NA     | NR_027923_4_+1  |
| 2010204K13Rik | -1.277 | -1.656 | -2.229 | -0.921 | -0.022 | 0.414  | -0.593 | 0.112  | -3.043 | -4.981 | 68355     | NA     | NR_027924_X_-1  |
| 2010204K13Rik | -4.841 | -2.312 | -2.108 | -2.067 | -0.679 | -0.807 | -1.655 | -1.435 | -4.981 | -3.758 | 68355     | NA     | NR_027925_X_-1  |
| 4930507D05Rik | -2.360 | -0.965 | -1.113 | -1.597 | -0.416 | -0.356 | -0.802 | -0.994 | -1.045 | -1.592 | 74706     | NA     | NR_027926_10_+1 |
| 1110020A21Rik | 1.285  | 1.493  | -1.029 | 0.008  | 0.070  | 0.648  | 0.380  | 0.446  | -0.064 | -0.341 | 68531     | NA     | NR_027930_17_-1 |
| 4930481A15Rik | 1.280  | -4.981 | -0.487 | -4.942 | 0.316  | -4.718 | 0.922  | -4.929 | 0.813  | -4.981 | 74931     | NA     | NR_027938_19_+1 |
| 1110038B12Rik | 3.010  | 2.877  | 3.068  | 2.357  | 2.449  | 1.990  | 3.230  | 2.915  | 2.462  | 2.430  | 68763     | NA     | NR_027943_17_-1 |
| 4930511M06Rik | -2.198 | -1.709 | -1.560 | -1.924 | -1.354 | -2.144 | -1.856 | -2.562 | -1.210 | -2.102 | 75084     | NA     | NR_027944_18_-1 |
| 4930526I15Rik | 2.335  | 1.839  | 1.767  | 1.171  | 1.991  | 1.800  | 1.572  | 1.524  | 1.488  | 0.673  | 75135     | NA     | NR_027950_9_+1  |
| Trmt61b       | 3.739  | 2.728  | 2.500  | 2.216  | 2.660  | 1.900  | 2.497  | 1.797  | 2.272  | 1.559  | 68789     | NA     | NR_027952_17_-1 |
| Trmt61b       | 3.040  | 2.141  | 1.705  | 1.097  | 1.951  | 1.068  | 1.679  | 0.455  | 1.042  | 0.549  | 68789     | NA     | NR_027953_17_-1 |
| 4931440P22Rik | 3.680  | 3.227  | 1.820  | 1.667  | 2.219  | 2.694  | 2.284  | 1.800  | 1.868  | 1.802  | 71004     | NA     | NR_027955_3_-1  |
| 1700052K11Rik | 2.460  | 3.427  | 1.917  | 2.328  | 2.519  | 2.704  | 1.368  | 1.911  | 1.831  | 1.767  | 73431     | NA     | NR_027956_11_-1 |
| Ppp4r1l-ps    | 2.727  | 2.633  | 2.164  | 2.137  | 2.080  | 2.511  | 1.703  | 2.054  | 2.430  | 2.179  | 100043911 | NA     | NR_027957_2_-1  |
| D930048N14Rik | 0.968  | 0.815  | -0.974 | -2.403 | 0.599  | 0.526  | 0.235  | -0.232 | -3.531 | -1.262 | 97775     | NA     | NR_027958_11_+1 |
| 9130230L23Rik | -4.981 | -2.583 | -2.771 | -3.259 | -1.449 | -1.003 | -3.261 | -3.668 | -4.981 | -2.609 | 231253    | NA     | NR_027961_5_-1  |
| Zfp783        | 2.837  | 2.818  | 1.826  | 1.904  | 1.347  | 2.270  | 1.152  | 1.523  | -0.985 | -1.969 | 232785    | NA     | NR_027963_6_+1  |
| Gm10416       | -2.205 | -2.895 | -2.013 | -3.579 | -1.666 | -3.070 | -2.246 | -4.016 | -2.178 | -2.555 | 667213    | NA     | NR_027964_5_-1  |
| Zbtb11os1     | 3.308  | 3.073  | 2.617  | 2.311  | 2.315  | 2.504  | 2.525  | 2.397  | 3.086  | 2.598  | 66391     | NA     | NR_027965_16_-1 |
| 4930429B21Rik | -1.365 | 0.048  | -2.666 | -3.280 | -4.550 | -3.690 | -1.963 | -2.075 | -4.981 | -2.572 | 67576     | NA     | NR_027966_3_+1  |
| Zfp85os       | 0.187  | -0.746 | -0.576 | -2.188 | -1.449 | -2.988 | -2.073 | -2.347 | -1.104 | -1.317 | 68271     | NA     | NR_027969_13_+1 |
| Atad3aos      | -0.379 | -1.814 | -2.038 | -2.516 | -2.754 | -2.991 | -1.955 | -2.841 | -3.904 | -3.209 | 70448     | NA     | NR_027971_4_+1  |
| Atad3aos      | 1.628  | -2.587 | -0.981 | -3.372 | -1.872 | -3.527 | -1.366 | -4.744 | -1.789 | -3.149 | 70448     | NA     | NR_027972_4_+1  |
| 5730522E02Rik | -2.739 | -4.981 | -0.971 | -2.288 | -4.361 | -4.793 | -4.248 | -4.429 | -2.659 | -4.981 | 70626     | NA     | NR_027973_11_-1 |
| 3110070M22Rik | 0.607  | 1.187  | -0.177 | 0.540  | -0.577 | 0.194  | -0.573 | -0.064 | -0.500 | -0.228 | 67304     | NA     | NR_027974_13_-1 |
| Gm5607        | -3.525 | -4.981 | -3.973 | -3.841 | -3.546 | -4.523 | -3.601 | -4.170 | -3.154 | -3.592 | 434280    | NA     | NR_027975_8_+1  |
| Wdr73         | 2.379  | 2.706  | 2.841  | 2.448  | 2.703  | 2.725  | 1.946  | 2.533  | 2.671  | 2.196  | 71968     | WDR73  | NR_027976_7_-1  |
| 4930465K10Rik | -1.571 | -4.981 | -4.946 | -4.047 | -4.692 | -4.779 | -3.659 | -4.801 | -2.834 | -4.981 | 67640     | NA     | NR_027978_18_+1 |
| 1700001L05Rik | -3.668 | -0.904 | -0.327 | -0.290 | -0.944 | -0.922 | -1.042 | -0.657 | 0.882  | 0.686  | 69291     | NA     | NR_027980_15_-1 |
| 2810025M15Rik | 4.967  | 5.062  | 4.936  | 5.355  | 5.458  | 5.464  | 5.190  | 5.195  | 1.781  | 4.571  | 69953     | NA     | NR_027984_1_+1  |
| 4632415L05Rik | 2.406  | 3.137  | 2.485  | 2.812  | 2.722  | 3.082  | 3.013  | 2.820  | 2.840  | 2.873  | 70808     | NA     | NR_027985_3_+1  |
| C030016D13Rik | -0.907 | -4.981 | -0.825 | -1.058 | -1.882 | -1.710 | -1.647 | -0.779 | -2.905 | -1.497 | 107372    | NA     | NR_027987_19_+1 |
| Enoph1        | 1.903  | 2.677  | 2.181  | 1.645  | 3.078  | 2.427  | 2.003  | 1.966  | 2.788  | 2.244  | 67870     | ENOPH1 | NR_027990_5_+1  |

|               |        |        |        |        |        |        |        |        |        |        |           |          |                 |
|---------------|--------|--------|--------|--------|--------|--------|--------|--------|--------|--------|-----------|----------|-----------------|
| Gm3414        | 2.283  | 2.472  | 3.161  | 2.950  | 2.428  | 2.328  | 2.256  | 2.344  | 2.318  | 2.907  | 100041576 | NA       | NR_027993_5_-1  |
| Ppfos         | 0.625  | -0.301 | -2.102 | -2.283 | -1.155 | -2.373 | -2.611 | -1.406 | 0.184  | -0.181 | 68173     | NA       | NR_028021_14_-1 |
| Gm10012       | -0.001 | 0.372  | 1.094  | 0.429  | -0.339 | -1.236 | 0.422  | -0.761 | -0.397 | -0.167 | 100043160 | NA       | NR_028042_17_-1 |
| Ngrn          | 3.062  | 2.969  | 2.676  | 1.928  | 2.888  | 1.798  | 2.398  | 2.053  | 2.929  | 2.058  | 83485     | NGRN     | NR_028053_7_+1  |
| Rit1          | 2.724  | 2.484  | 2.331  | 2.590  | 1.738  | 2.412  | 2.738  | 2.551  | 2.591  | 3.167  | 19769     | RIT1     | NR_028056_3_+1  |
| Gm8615        | -1.395 | 4.804  | -2.812 | 6.120  | -2.113 | 6.177  | -2.811 | 5.816  | -1.352 | 7.022  | 667410    | NA       | NR_028061_5_-1  |
| Snora21       | -3.668 | -2.895 | -3.696 | -4.376 | -4.075 | -4.784 | -4.392 | -4.939 | -4.981 | -4.316 | 100302498 | NA       | NR_028078_11_-1 |
| Snora3        | -3.668 | -3.315 | -3.124 | -4.149 | -4.160 | -4.440 | -4.423 | -3.475 | -3.531 | -4.227 | 100302499 | NA       | NR_028079_7_+1  |
| Pradc1        | 3.729  | 3.970  | 2.824  | 3.049  | 2.764  | 2.664  | 3.013  | 2.200  | 2.659  | 2.533  | 73327     | PRADC1   | NR_028081_6_-1  |
| Smim1012a     | 2.272  | 2.445  | 0.210  | 0.001  | -0.746 | -0.666 | -1.983 | -1.329 | -2.434 | -2.093 | 320237    | NA       | NR_028086_X_+1  |
| Cox18         | 2.107  | 2.152  | 2.183  | 1.157  | 2.400  | 1.646  | 1.564  | 0.869  | 1.129  | 0.224  | 231430    | COX18    | NR_028088_5_-1  |
| Rabggtb       | 2.816  | 2.249  | 2.449  | 2.440  | 2.601  | 2.541  | 2.323  | 2.199  | 1.676  | 2.060  | 19352     | RABGGTB  | NR_028094_3_-1  |
| Rabggtb       | -4.458 | -2.901 | -3.539 | -2.424 | -4.678 | -4.941 | -4.273 | -3.894 | -4.387 | -4.703 | 19352     | RABGGTB  | NR_028095_3_-1  |
| Rabggtb       | 2.009  | 1.811  | 0.518  | 1.019  | 1.125  | 1.058  | 0.448  | 1.489  | 1.104  | 0.401  | 19352     | RABGGTB  | NR_028096_3_-1  |
| Rabggtb       | 1.101  | 0.319  | -1.062 | -3.380 | -0.720 | -1.996 | 0.385  | 0.134  | -0.456 | 0.225  | 19352     | RABGGTB  | NR_028097_3_-1  |
| Rabggtb       | -1.235 | -0.081 | -1.368 | 1.236  | 0.191  | -0.176 | -1.743 | -0.204 | -1.004 | -0.309 | 19352     | RABGGTB  | NR_028098_3_-1  |
| Gm12191       | 8.721  | 7.342  | 8.820  | 7.627  | 8.577  | 7.362  | 8.835  | 7.350  | 7.305  | 6.167  | 666899    | NA       | NR_028101_15_-1 |
| Myeov2        | 1.638  | 0.799  | 1.504  | 1.276  | 1.674  | 1.000  | 1.374  | 0.736  | 0.810  | 0.682  | 66915     | COPS9    | NR_028108_1_-1  |
| Fam172a       | 2.110  | -4.549 | -0.193 | -4.675 | 1.372  | -4.903 | 0.467  | -3.913 | 0.557  | -4.837 | 68675     | FAM172A  | NR_028109_13_+1 |
| Ppp2r3d       | -0.336 | -0.053 | -0.862 | -1.040 | -1.169 | -1.740 | -0.832 | -0.953 | -0.669 | -0.394 | 19054     | NA       | NR_028110_9_-1  |
| 4930523C07Rik | 1.060  | -0.084 | 1.320  | 0.725  | 2.109  | 1.931  | 1.549  | 1.089  | 0.640  | 1.312  | 67647     | KIAA0040 | NR_028111_1_+1  |
| 0610039K10Rik | -0.659 | -0.301 | -1.067 | -1.816 | -1.702 | -1.851 | -1.458 | -1.654 | -1.068 | -0.583 | 68386     | NA       | NR_028113_2_+1  |
| Pex16         | 4.447  | 3.903  | 2.961  | 2.692  | 4.762  | 4.728  | 4.043  | 3.449  | 2.841  | 1.977  | 18633     | PEX16    | NR_028114_2_+1  |
| Lilra6        | 0.319  | 1.506  | 0.098  | -1.041 | 2.812  | 2.121  | 1.615  | 2.382  | 4.106  | 4.901  | 18726     | LILRB3   | NR_028115_7_-1  |
| Mgarp         | -1.627 | -4.981 | -4.876 | -4.923 | -4.973 | -4.980 | -4.980 | -4.981 | -4.981 | -4.981 | 67749     | MGARP    | NR_028121_3_-1  |
| 2310001K24Rik | -4.981 | -2.160 | -4.981 | -4.981 | -4.919 | -4.924 | -4.981 | -4.981 | -4.981 | -4.981 | 69517     | NA       | NR_028122_2_+1  |
| 1600029I14Rik | -2.273 | -1.814 | 4.564  | 5.176  | 1.210  | 3.635  | 1.359  | 1.754  | -4.981 | -3.386 | 69797     | NA       | NR_028123_9_+1  |
| 2310068J16Rik | -0.260 | -0.308 | -0.232 | -0.829 | -0.849 | -1.003 | -0.513 | -1.788 | -1.281 | -1.451 | 70281     | NA       | NR_028124_15_-1 |
| 0610038B21Rik | -2.107 | -4.981 | -4.988 | -3.498 | -4.861 | -4.969 | -2.754 | -4.707 | -2.226 | -3.459 | 70345     | NA       | NR_028125_8_+1  |
| 6330407A03Rik | 3.704  | 3.399  | 2.696  | 2.854  | 3.034  | 3.223  | 2.981  | 2.639  | 2.502  | 2.971  | 70720     | NA       | NR_028126_4_+1  |
| Pnpla2        | 0.111  | -0.581 | -0.856 | 0.331  | -0.047 | -2.632 | -2.250 | -0.532 | 1.064  | 1.027  | 66853     | PNPLA2   | NR_028142_7_+1  |
| Lrrc28        | 3.454  | 3.446  | 3.534  | 2.133  | 3.001  | 2.715  | 2.322  | 1.827  | 2.474  | 1.168  | 67867     | LRRC28   | NR_028143_7_-1  |
| Lrrc28        | -1.462 | -0.474 | 0.270  | -0.565 | -2.496 | -0.799 | -1.623 | -3.795 | -1.070 | -0.810 | 67867     | LRRC28   | NR_028144_7_-1  |
| Stoml1        | 5.291  | 5.387  | 3.309  | 4.047  | 2.863  | 3.664  | 2.467  | 3.349  | 3.054  | 2.558  | 69106     | STOML1   | NR_028146_9_+1  |
| Sapcd1        | 0.287  | 0.993  | -4.796 | -3.414 | -4.378 | -3.262 | -3.082 | -2.432 | -4.888 | -4.981 | 78376     | SAPCD1   | NR_028258_17_-1 |
| Afg3l1        | 0.604  | 2.261  | 2.743  | 1.692  | 2.611  | 2.082  | 0.838  | 1.026  | 1.781  | 0.714  | 114896    | NA       | NR_028260_8_+1  |
| Rian          | -4.981 | -4.981 | -4.964 | -4.605 | -4.513 | -4.554 | -4.965 | -4.948 | -4.981 | -4.981 | 75745     | NA       | NR_028261_12_+1 |
| B130006D01Rik | 0.856  | 1.078  | 1.106  | 0.630  | 0.650  | 0.558  | 0.683  | 0.041  | 0.075  | 0.041  | 320616    | NA       | NR_028263_11_+1 |
| Dleu2         | 2.462  | 2.742  | 3.097  | 3.180  | 2.908  | 2.854  | 3.885  | 3.950  | 4.411  | 5.043  | 668253    | NA       | NR_028264_14_-1 |
| BC037032      | 0.606  | 0.034  | 1.529  | 0.443  | -1.729 | -2.113 | 0.127  | 0.036  | 1.289  | 0.415  | 414066    | NA       | NR_028266_15_-1 |
| Fcho1         | 4.249  | 3.967  | 3.776  | 3.602  | 3.919  | 3.235  | 3.450  | 3.066  | 2.951  | 2.769  | 74015     | FCHO1    | NR_028267_8_-1  |
| Orc6          | -4.981 | -0.315 | -2.556 | -2.918 | -0.513 | -3.057 | -1.152 | -2.924 | -2.677 | -2.380 | 56452     | ORC6     | NR_028268_8_+1  |
| Phxr4         | 3.408  | 3.397  | 1.340  | 1.934  | -1.252 | 0.126  | 0.978  | 0.854  | -0.397 | -0.848 | 18689     | NA       | NR_028271_9_+1  |
| Gm8801        | 1.950  | 2.993  | 2.104  | 2.471  | 2.390  | 2.446  | 2.130  | 2.070  | 2.535  | 2.483  | 667766    | NA       | NR_028278_17_+1 |
| Pram1         | -0.099 | -1.313 | -2.880 | -3.399 | 1.064  | 1.798  | -0.119 | 1.177  | 2.191  | 0.424  | 378460    | PRAM1    | NR_028279_17_+1 |
| Prr18         | -4.981 | -4.075 | -4.675 | -4.949 | -4.966 | -4.956 | -4.969 | -4.939 | -4.845 | -4.658 | 320111    | PRR18    | NR_028280_17_+1 |
| 2210417A02Rik | -1.068 | -0.838 | -3.212 | -2.693 | -0.796 | -1.959 | -0.202 | -0.284 | 0.092  | -0.371 | 70138     | NA       | NR_028285_5_+1  |
| Fance         | 2.765  | 2.014  | 1.013  | 1.075  | 1.455  | 1.486  | 1.063  | 0.193  | 1.918  | 1.621  | 72775     | FANCE    | NR_028296_17_+1 |
| Fance         | 0.522  | 1.585  | 0.835  | 1.018  | 1.029  | 1.526  | 1.416  | 0.781  | 1.347  | 1.099  | 72775     | FANCE    | NR_028297_17_+1 |
| 2610306M01Rik | 3.458  | 3.977  | 2.092  | 2.451  | 2.037  | 2.559  | 2.018  | 2.093  | 1.472  | 1.633  | 67170     | NA       | NR_028298_6_-1  |
| 1700084E18Rik | 0.153  | -1.242 | -1.504 | -1.525 | -1.500 | -1.258 | -1.436 | -0.886 | -2.333 | -1.989 | 67350     | NA       | NR_028299_2_-1  |
| Dubr          | 2.566  | 2.111  | 2.600  | 2.303  | 1.771  | 0.997  | 2.091  | 1.799  | 1.658  | 1.559  | 68190     | NA       | NR_028300_16_-1 |
| Tmem181c-ps   | 1.281  | 0.590  | 1.056  | 0.298  | 0.677  | 0.180  | 0.772  | 0.655  | 1.375  | 1.339  | 100040525 | NA       | NR_028305_17_-1 |
| Yaf2          | 3.401  | 3.156  | 2.171  | 2.805  | 2.771  | 3.039  | 2.505  | 2.660  | 2.839  | 2.362  | 67057     | NA       | NR_028315_15_-1 |
| Mdp1          | 4.978  | 5.570  | 4.893  | 4.566  | 5.630  | 5.819  | 5.449  | 5.334  | 4.181  | 4.257  | 67881     | MDP1     | NR_028316_14_-1 |
| AU015836      | -0.761 | -1.842 | -3.137 | -4.638 | -4.981 | -4.981 | -4.981 | -4.981 | -4.981 | -4.981 | 385493    | NA       | NR_028320_X_+1  |
| Appbp2os      | -0.746 | -1.527 | -1.751 | -1.755 | -1.645 | -1.829 | -1.351 | -2.178 | -1.577 | -2.392 | 654810    | NA       | NR_028329_11_+1 |
| Zfp672        | 2.194  | 1.499  | 0.666  | -0.336 | 0.523  | -0.883 | 0.423  | -0.219 | 0.937  | -0.067 | 319475    | ZNF672   | NR_028331_11_-1 |
| Taf1b         | 2.715  | 4.549  | 1.018  | 3.566  | 1.502  | 3.638  | 1.949  | 3.442  | 2.115  | 3.028  | 21340     | TAF1B    | NR_028341_12_+1 |
| Nt5c2         | 3.752  | 1.042  | 3.296  | 1.132  | 3.301  | -0.018 | 2.241  | -0.850 | 2.297  | -0.592 | 76952     | NT5C2    | NR_028353_19_-1 |
| Mvd           | 0.101  | 0.028  | -1.138 | -2.828 | -1.569 | -2.231 | -1.790 | -0.800 | 0.441  | -0.808 | 192156    | MVD      | NR_028354_8_-1  |
| Sra1          | 3.075  | 2.495  | 1.692  | 2.257  | 1.930  | 2.701  | 1.819  | 2.025  | 2.142  | 2.278  | 24068     | SRA1     | NR_028355_18_-1 |
| 5830417I10Rik | 3.834  | 4.134  | 4.212  | 4.187  | 4.496  | 4.486  | 4.397  | 4.127  | 3.862  | 4.279  | 100302730 | NA       | NR_028359_3_+1  |
| 1700018I02Rik | 1.195  | 0.977  | 0.197  | 0.300  | -0.865 | -1.336 | -1.362 | -1.567 | 0.059  | 0.033  | 67329     | NA       | NR_028360_19_+1 |
| AA465934      | -2.833 | -0.792 | -1.790 | -2.581 | -2.826 | -3.015 | -1.984 | -3.046 | -2.256 | -3.305 | 613254    | NA       | NR_028363_11_+1 |
| AI450353      | 0.418  | 1.395  | -0.082 | -0.329 | -0.426 | -0.583 | -0.011 | -1.155 | -1.221 | -1.894 | 103729    | NA       | NR_028364_11_+1 |
| Nip7          | 2.261  | 2.416  | 2.750  | 3.015  | 2.253  | 1.822  | 2.394  | 1.588  | 1.816  | 1.017  | 66164     | NIP7     | NR_028367_8_+1  |
| 4930404I05Rik | -0.608 | -0.347 | 0.860  | 0.205  | 0.523  | 0.065  | -0.753 | -1.426 | -1.462 | -1.292 | 67394     | NA       | NR_028368_16_+1 |
| A930004D18Rik | -4.981 | -4.981 | -3.556 | -3.969 | -4.900 | -4.975 | -4.422 | -4.048 | -4.981 | -4.462 | 77940     | NA       | NR_028376_2_-1  |
| Gm17762       | -2.388 | -1.670 | -0.254 | -0.157 | -2.765 | -1.284 | -1.633 | -2.130 | -4.981 | -3.794 | 100034739 | NA       | NR_028378_2_+1  |
| Ftx           | 6.361  | 6.208  | 2.424  | 1.996  | 2.816  | 2.527  | 2.568  | 2.198  | 2.311  | 2.003  | 78878     | NA       | NR_028380_X_-1  |
| Ftx           | 4.147  | 4.137  | 0.348  | -0.761 | 0.704  | 0.375  | 0.702  | 0.263  | -0.059 | -0.123 | 78878     | NA       | NR_028381_X_-1  |
| B230319C09Rik | -4.981 | -4.981 | -2.441 | -4.291 | -4.590 | -4.949 | -3.736 | -3.775 | -4.981 | -3.758 | 320775    | NA       | NR_028382_6_+1  |
| 4930528A17Rik | -1.318 | -0.657 | -0.745 | -0.169 | -0.801 | -1.051 | -1.426 | -1.549 | -1.073 | -1.376 | 67735     | NA       | NR_028384_4_-1  |

|               |        |        |        |        |        |        |        |        |        |        |           |          |                 |
|---------------|--------|--------|--------|--------|--------|--------|--------|--------|--------|--------|-----------|----------|-----------------|
| Gm10190       | 0.597  | -0.308 | -0.843 | -1.905 | -1.661 | -1.824 | -1.429 | -2.067 | -3.352 | -2.804 | 791338    | NA       | NR_028385_17_-1 |
| Tsr2          | 1.631  | 2.209  | 1.025  | 0.249  | 1.586  | 0.889  | 0.954  | 0.776  | 0.460  | -1.138 | 69499     | TSR2     | NR_028392_X_-1  |
| Taf1d         | 4.464  | 4.795  | 4.458  | 4.160  | 4.434  | 4.272  | 4.464  | 4.093  | 3.032  | 3.209  | 75316     | TAF1D    | NR_028401_9_+1  |
| Ufd1l         | 4.069  | 4.608  | 3.594  | 3.148  | 3.533  | 3.946  | 3.202  | 3.318  | 3.153  | 2.961  | 22230     | UFD1L    | NR_028403_16_+1 |
| Marcks1-ps4   | -4.981 | -4.981 | -4.960 | -4.310 | -4.999 | -4.928 | -4.944 | -4.963 | -4.981 | -4.981 | 111002    | NA       | NR_028405_13_+1 |
| D630041G03Rik | -2.739 | -4.981 | -1.689 | -4.968 | -2.799 | -4.597 | -1.908 | -4.200 | -4.981 | -4.981 | 320749    | NA       | NR_028416_7_-1  |
| Gm7854        | -2.164 | -2.349 | -0.808 | -2.290 | -2.716 | -3.527 | -2.108 | -2.794 | -0.269 | -2.771 | 665934    | NA       | NR_028417_5_-1  |
| Tmem179b      | 4.412  | 3.906  | 4.119  | 3.640  | 3.624  | 3.459  | 3.560  | 3.135  | 3.263  | 2.505  | 67706     | TMEM179B | NR_028418_19_-1 |
| Tmem179b      | 4.209  | 4.173  | 3.576  | 3.648  | 3.484  | 3.439  | 3.472  | 3.406  | 3.394  | 3.210  | 67706     | TMEM179B | NR_028419_19_-1 |
| Zfp809        | 0.944  | 2.235  | 2.130  | 1.823  | 1.778  | 2.004  | 1.775  | 1.970  | 0.692  | 1.730  | 235047    | NA       | NR_028420_9_+1  |
| D430020J02Rik | 0.029  | 0.750  | 1.451  | 1.662  | 1.824  | 1.715  | 1.365  | 0.427  | 0.326  | -1.140 | 319545    | NA       | NR_028421_12_-1 |
| Gm2176        | 1.118  | 0.764  | -4.323 | -3.930 | -3.456 | -2.910 | -2.739 | -4.779 | -4.981 | -4.981 | 100039348 | NA       | NR_028424_18_-1 |
| Gm5129        | 2.076  | 2.343  | 1.479  | 1.250  | 1.420  | 2.340  | 1.719  | 1.049  | 0.122  | 0.360  | 332993    | NA       | NR_028426_5_-1  |
| Mirt1         | 3.986  | 1.743  | 1.984  | 0.513  | 3.951  | 1.256  | 3.231  | 1.169  | 2.515  | -0.358 | 381232    | NA       | NR_028427_19_-1 |
| 2610005L07Rik | 4.596  | 5.139  | 5.455  | 5.158  | 5.767  | 5.666  | 5.115  | 5.053  | 4.945  | 4.777  | 381598    | NA       | NR_028428_8_-1  |
| Thap6         | 2.800  | 3.008  | 2.814  | 2.812  | 2.899  | 2.760  | 3.111  | 2.787  | 3.139  | 3.165  | 381650    | NA       | NR_028429_5_+1  |
| BC052688      | -3.668 | -4.981 | -4.471 | -3.998 | -3.501 | -3.916 | -3.772 | -4.048 | -2.709 | -2.752 | 432812    | NA       | NR_028430_13_+1 |
| 9330020H09Rik | 2.870  | 2.529  | 2.016  | 1.706  | 2.444  | 2.741  | 1.744  | 1.694  | 1.306  | 0.922  | 100048895 | NA       | NR_028442_15_+1 |
| F930015N05Rik | -1.314 | -1.222 | -4.931 | -4.616 | -4.981 | -4.981 | -4.954 | -4.926 | -4.981 | -4.981 | 654805    | NA       | NR_028445_11_-1 |
| Hdac10        | -1.466 | 2.765  | -1.706 | 0.083  | -1.104 | 2.223  | -2.957 | 1.668  | -4.295 | 1.013  | 170787    | HDAC10   | NR_028447_15_-1 |
| Hdac10        | 1.171  | 4.478  | 0.949  | 1.574  | 1.703  | 3.979  | 0.258  | 2.760  | 0.047  | 2.276  | 170787    | HDAC10   | NR_028448_15_-1 |
| Hdac10        | 3.754  | -1.412 | 2.274  | 0.465  | 4.060  | 1.757  | 3.154  | 0.846  | 3.165  | 1.412  | 170787    | HDAC10   | NR_028449_15_-1 |
| Snora75       | -4.981 | -3.267 | -4.593 | -4.161 | -4.721 | -4.240 | -3.665 | -4.597 | -4.981 | -4.316 | 100303740 | NA       | NR_028478_1_-1  |
| Gm12238       | -4.981 | -4.981 | -3.378 | -4.294 | -4.067 | -4.843 | -3.768 | -4.875 | -4.981 | -4.981 | 100303747 | NA       | NR_028480_11_+1 |
| Snora31       | -2.494 | -4.981 | -2.695 | -3.137 | -2.584 | -4.282 | -3.005 | -4.414 | -2.075 | -3.181 | 100303751 | NA       | NR_028481_14_+1 |
| 1700001O22Rik | -4.689 | -2.600 | -4.769 | -4.361 | -4.784 | -4.972 | -4.304 | -4.965 | -4.981 | -4.981 | 73598     | C9orf50  | NR_028486_2_-1  |
| 1700001O22Rik | -3.982 | -4.981 | -4.776 | -4.463 | -3.316 | -4.698 | -4.508 | -4.949 | -4.981 | -4.981 | 73598     | C9orf50  | NR_028487_2_-1  |
| Gm13315       | -4.981 | -0.765 | -1.390 | -1.640 | -4.784 | -4.927 | -4.855 | -4.977 | -4.981 | -3.749 | 625342    | NA       | NR_028497_2_+1  |
| Fxyd2         | -4.981 | -4.981 | -4.977 | -4.977 | -3.368 | -4.927 | -4.705 | -4.973 | -4.981 | -4.981 | 11936     | NA       | NR_028499_9_+1  |
| Snora78       | -1.922 | -1.351 | -2.150 | -2.591 | -1.882 | -2.302 | -1.935 | -2.268 | -1.488 | -1.911 | 100306952 | NA       | NR_028515_17_-1 |
| Gm10451       | -0.609 | 0.016  | -0.257 | -2.288 | -0.624 | -2.309 | -1.262 | -2.771 | -0.990 | -1.783 | 100041694 | NA       | NR_028520_12_+1 |
| Snord8        | -3.563 | -4.981 | -4.981 | -4.981 | -4.132 | -4.751 | -4.675 | -4.834 | -4.981 | -4.981 | 100217445 | NA       | NR_028542_14_-1 |
| Snora7a       | -3.563 | -3.267 | -4.485 | -4.049 | -4.107 | -4.838 | -4.984 | -4.717 | -4.394 | -3.449 | 100217451 | NA       | NR_028546_6_-1  |
| Snord16a      | -3.668 | -4.981 | -4.052 | -4.893 | -4.679 | -4.789 | -4.860 | -4.640 | -4.981 | -4.981 | 100217453 | NA       | NR_028548_9_+1  |
| Snord89       | -4.981 | -4.981 | -4.487 | -4.690 | -4.059 | -4.528 | -4.299 | -4.843 | -4.190 | -4.981 | 100217461 | NA       | NR_028555_1_-1  |
| Snora41       | -4.981 | -3.315 | -1.876 | -4.165 | -4.197 | -4.132 | -3.481 | -4.149 | -4.981 | -3.882 | 100217464 | NA       | NR_028558_1_+1  |
| Snord96a      | -4.981 | -4.981 | -4.607 | -4.857 | -4.824 | -4.778 | -4.521 | -4.694 | -3.351 | -4.981 | 100216534 | NA       | NR_028563_11_+1 |
| Snord1b       | -4.981 | -4.981 | -4.981 | -4.981 | -4.822 | -4.856 | -4.981 | -4.981 | -4.981 | -4.981 | 100216531 | NA       | NR_028567_11_+1 |
| Snhg8         | 4.467  | 4.769  | 3.629  | 3.390  | 4.062  | 4.059  | 3.965  | 3.795  | 2.772  | 2.465  | 69895     | NA       | NR_028574_3_-1  |
| Scarna13      | -4.981 | -1.272 | -4.367 | -4.651 | -3.799 | -3.848 | -4.270 | -4.103 | -4.981 | -3.816 | 100306943 | NA       | NR_028576_12_-1 |
| D030025P21Rik | -4.981 | -1.814 | 1.534  | 1.553  | -4.586 | -4.934 | -4.736 | -4.974 | -4.981 | -4.981 | 100303738 | NA       | NR_028577_12_+1 |
| Gm10584       | 0.655  | 0.239  | 0.822  | 1.092  | 0.120  | 0.254  | 0.054  | -0.931 | -2.474 | -2.923 | 100043682 | NA       | NR_028578_7_+1  |
| Gm10825       | 0.800  | -2.160 | 1.511  | -0.229 | 2.044  | -3.835 | 1.555  | -3.402 | 2.061  | -1.340 | 100038752 | NA       | NR_028580_10_+1 |
| Arfrp1        | 2.889  | 3.023  | 2.810  | 2.222  | 2.673  | 2.459  | 2.501  | 2.760  | 2.033  | 2.589  | 76688     | ARFRP1   | NR_028585_2_-1  |
| Gm14005       | -2.801 | -1.829 | 1.412  | 2.621  | -0.450 | 0.751  | 0.026  | 0.776  | 1.699  | 2.699  | 100043424 | NA       | NR_028589_2_-1  |
| Gm14005       | -4.981 | -4.981 | 1.058  | 0.901  | -1.618 | -2.206 | -0.826 | -1.943 | 0.885  | 0.524  | 100043424 | NA       | NR_028590_2_-1  |
| Gm14005       | -0.175 | -1.089 | 4.193  | 3.697  | 2.040  | 1.814  | 2.771  | 2.376  | 4.200  | 3.676  | 100043424 | NA       | NR_028591_2_-1  |
| Gm10069       | -2.240 | -4.981 | -2.677 | -4.062 | -2.841 | -2.807 | -2.889 | -3.973 | -3.235 | -2.887 | 791299    | NA       | NR_028592_6_+1  |
| Gm10069       | -1.084 | -0.179 | -3.658 | -3.826 | -3.169 | -3.168 | -3.728 | -3.710 | -4.981 | -3.379 | 791299    | NA       | NR_028593_6_+1  |
| Mir17hg       | 0.618  | 0.880  | 1.112  | 1.230  | 0.779  | 0.942  | 0.895  | 1.466  | 1.121  | 1.390  | 75957     | NA       | NR_028592_14_+1 |
| Snora16a      | -4.981 | -2.681 | -4.977 | -3.983 | -4.593 | -4.654 | -3.387 | -4.680 | -4.981 | -4.981 | 100310813 | NA       | NR_029412_4_+1  |
| Tmem161b      | 0.867  | 1.299  | 1.355  | 0.041  | -0.279 | -0.101 | 0.743  | -0.410 | 0.770  | 1.154  | 72745     | TMEM161B | NR_029418_13_+1 |
| Tmem161b      | 0.219  | 1.797  | 3.149  | 2.423  | 2.107  | 1.938  | 0.806  | 1.617  | 0.660  | 1.966  | 72745     | TMEM161B | NR_029419_13_+1 |
| Cfap53        | -4.981 | -4.981 | -4.818 | -3.506 | -4.971 | -4.915 | -3.837 | -4.909 | -4.981 | -4.951 | 74453     | CFAP53   | NR_029424_18_+1 |
| RbmX          | 4.001  | 4.429  | 4.141  | 3.768  | 3.900  | 4.193  | 3.809  | 4.076  | 3.448  | 3.586  | 19655     | RBMX     | NR_029425_X_-1  |
| Stmn1-rs1     | -2.274 | -2.511 | -4.821 | -4.973 | -4.774 | -4.659 | -4.338 | -4.957 | -4.981 | -4.981 | 111186    | NA       | NR_029430_9_-1  |
| 1500015A07Rik | 4.140  | 3.433  | 2.342  | 2.149  | 2.176  | 2.158  | 2.128  | 2.125  | 1.926  | 1.679  | 68982     | NA       | NR_029432_18_+1 |
| 1700028J19Rik | 3.090  | 3.663  | 0.172  | -0.485 | -1.039 | -0.583 | -0.668 | -0.222 | 0.353  | 0.096  | 70004     | NA       | NR_029436_7_-1  |
| 493340618Rik  | -4.981 | -4.981 | -2.436 | -4.515 | -4.907 | -4.954 | -4.251 | -3.977 | -2.957 | -4.316 | 71045     | NA       | NR_029437_7_-1  |
| 493340618Rik  | -4.981 | -4.981 | -3.741 | -4.529 | -4.981 | -4.981 | -4.542 | -3.728 | -4.981 | -4.975 | 71045     | NA       | NR_029438_7_-1  |
| 2010320M18Rik | 4.101  | 4.171  | 2.784  | 2.800  | 2.103  | 2.247  | 2.741  | 2.311  | 1.954  | 2.106  | 72093     | NA       | NR_029440_8_+1  |
| 2810454H06Rik | 2.002  | 2.048  | 1.145  | 0.592  | 1.336  | 1.436  | 2.037  | 1.262  | 1.298  | 0.867  | 72813     | NA       | NR_029441_6_+1  |
| 4933407K13Rik | 2.076  | 2.034  | 1.203  | 1.547  | 2.008  | 1.649  | 1.258  | 1.422  | 1.926  | 1.866  | 74396     | NA       | NR_029443_X_-1  |
| 4930579K19Rik | 2.181  | 1.694  | -0.247 | -1.309 | -0.508 | -0.572 | -1.072 | -0.409 | -2.957 | -1.455 | 75881     | NA       | NR_029444_9_-1  |
| 6230400D17Rik | -1.165 | -0.918 | -2.595 | -1.942 | -1.193 | -2.896 | -0.842 | -1.444 | -1.041 | -1.755 | 76133     | NA       | NR_029446_14_-1 |
| E130317F20Rik | 2.379  | 1.817  | 1.609  | 1.211  | 1.207  | 1.362  | 1.131  | 0.325  | -0.429 | -1.141 | 414101    | NA       | NR_029447_10_-1 |
| C530005A16Rik | 0.592  | -0.225 | -2.315 | -2.001 | -1.543 | -1.025 | -1.589 | -2.015 | -1.950 | -1.236 | 654318    | NA       | NR_029450_4_-1  |
| 4932416H05Rik | 0.804  | 1.002  | 0.128  | 0.044  | -0.196 | -0.053 | -0.104 | 0.045  | 1.516  | 1.518  | 654409    | NA       | NR_029452_2_-1  |
| Mccc1os       | -2.378 | 0.026  | -1.774 | -1.276 | -1.616 | -1.374 | -1.310 | -1.788 | -2.274 | -0.700 | 654424    | NA       | NR_029456_3_+1  |
| G530011O06Rik | 3.571  | 1.112  | 0.897  | -0.516 | 1.332  | 0.886  | 0.660  | -0.767 | 0.284  | -1.071 | 654820    | NA       | NR_029457_X_-1  |
| A530088E08Rik | 2.242  | 0.637  | 0.230  | -1.181 | 2.339  | 0.268  | 2.022  | -0.935 | 1.632  | -0.304 | 664702    | NA       | NR_029458_17_+1 |
| Sec14l1       | 0.437  | 0.379  | 1.149  | 1.271  | 0.175  | -1.008 | 0.950  | 0.748  | 1.689  | 1.386  | 74136     | SEC14L1  | NR_029459_11_+1 |
| 6530402F18Rik | 1.590  | 1.416  | 2.773  | 3.037  | 3.057  | 2.712  | 3.321  | 3.353  | 4.490  | 5.072  | 76220     | NA       | NR_029460_2_-1  |
| 9430083A17Rik | 3.810  | 3.252  | -4.055 | -1.570 | -2.184 | -2.419 | -1.769 | -2.221 | -1.721 | -1.417 | 77428     | NA       | NR_029463_13_-1 |

|                |        |        |        |        |        |        |        |        |        |        |               |          |                      |
|----------------|--------|--------|--------|--------|--------|--------|--------|--------|--------|--------|---------------|----------|----------------------|
| 503340609Rik   | 3.650  | 2.826  | 2.725  | 2.898  | -0.315 | -0.876 | 0.082  | 0.688  | -0.781 | -0.591 | 77675         | NA       | NR_029464_12_-1      |
| Snhg12         | 2.734  | 2.201  | 2.850  | 2.485  | 2.238  | 2.064  | 2.974  | 2.659  | 1.499  | 1.566  | 100039864     | NA       | NR_029468_4_+1       |
| Gm10863        | -2.739 | -2.275 | -3.842 | -2.900 | -3.353 | -4.025 | -3.424 | -3.070 | -2.834 | -1.707 | 100041655     | NA       | NR_029470_15_+1      |
| Rps15a-ps6     | 2.104  | 2.089  | 3.257  | 2.853  | 3.040  | 2.359  | 2.913  | 2.274  | 1.683  | 1.707  | 100042173     | NA       | NR_029471_11_-1      |
| Ppp1r3fos      | -1.665 | -2.349 | -2.487 | -3.024 | -2.196 | -1.322 | -1.559 | -1.457 | -2.223 | -2.367 | 78185         | NA       | NR_029473_X_+1       |
| B430319G15Rik  | 2.970  | 2.939  | -4.254 | -4.221 | -4.450 | -4.906 | -4.981 | -4.708 | -4.981 | -4.981 | 78575         | NA       | NR_029474_9_-1       |
| 4930581F22Rik  | 3.407  | 3.168  | 1.430  | 1.386  | 2.764  | 2.845  | 2.369  | 1.898  | 1.826  | 1.660  | 78934         | NA       | NR_029475_9_+1       |
| Mir142         | -3.563 | -4.794 | -4.975 | -4.975 | -4.981 | -4.981 | -4.951 | -4.931 | -4.394 | -4.965 | 387160        | NA       | NR_029555_11_+1      |
| Mir682         | -4.981 | -4.981 | -3.723 | -4.709 | -4.965 | -4.965 | -3.366 | -4.904 | -3.593 | -4.981 | 751556        | NA       | NR_030451_13_+1      |
| Mir703         | 0.411  | 0.611  | 1.543  | 1.189  | 0.649  | 0.164  | 1.135  | -0.016 | 0.202  | 0.776  | 735265        | NA       | NR_030484_5_-1       |
| Mir568         | -4.981 | -3.315 | -4.835 | -4.876 | -4.982 | -4.982 | -4.883 | -4.978 | -4.981 | -3.855 | 100124467     | NA       | NR_030576_16_+1      |
| 1700034H15Rik  | -4.981 | -4.981 | -2.287 | -1.961 | -3.108 | -2.243 | -1.183 | -1.294 | -0.959 | 0.194  | 98736         | NA       | NR_030669_1_-1       |
| Gm15760        | 1.194  | 1.160  | 0.371  | -0.722 | 0.006  | 0.424  | 0.413  | -0.648 | 0.003  | -0.094 | 100042948     | NA       | NR_030670_16_-1      |
| AW011738       | -0.289 | -1.178 | 3.007  | 2.485  | 4.481  | 3.899  | 3.878  | 3.014  | 3.369  | 2.877  | 100382        | NA       | NR_030671_4_+1       |
| D930016D06Rik  | 2.211  | 2.536  | 1.731  | 1.247  | 1.741  | 1.828  | 1.949  | 1.516  | 1.167  | 1.424  | 100662        | NA       | NR_030673_5_+1       |
| Gm4532         | -0.653 | 0.126  | -0.391 | -1.430 | -0.839 | -0.900 | -0.748 | -1.180 | -2.036 | -2.131 | 100043580     | NA       | NR_030674_7_-1       |
| D730005E14Rik  | 4.278  | 0.131  | 3.696  | -0.415 | 3.685  | -0.809 | 3.994  | -0.784 | 1.890  | -0.480 | 109361        | NA       | NR_030675_15_-1      |
| Phtf1os        | 0.924  | 0.877  | 0.547  | 1.142  | 0.699  | 0.515  | 0.886  | 0.253  | 0.204  | 0.510  | 100125931     | NA       | NR_030676_3_-1       |
| BC025920       | 2.538  | 2.502  | -0.175 | -0.158 | 0.638  | 0.242  | 0.400  | 0.525  | -0.421 | -0.441 | 268319        | NA       | NR_030677_10_+1      |
| Gm4598         | -0.163 | 0.106  | -3.509 | -3.521 | -2.968 | -2.564 | -3.067 | -3.700 | -1.749 | -3.165 | 100043706     | NA       | NR_030681_7_+1       |
| 2810410L24Rik  | -4.981 | -4.981 | -4.936 | -4.936 | -4.400 | -4.986 | -4.707 | -3.880 | -3.738 | -4.981 | 100042332     | NA       | NR_030682_11_-1      |
| Gm14207        | 6.395  | 1.259  | -1.138 | -4.976 | -1.227 | -3.902 | -3.710 | -4.807 | -4.981 | -4.981 | 100043609     | NA       | NR_030683_2_-1       |
| Gm6402         | 0.516  | -0.246 | 0.741  | -0.748 | 1.419  | -0.798 | 0.784  | -1.981 | -0.213 | -1.455 | 623169        | NA       | NR_030688_17_-1      |
| 4930539J05Rik  | -2.948 | -2.291 | -2.689 | -2.612 | -2.393 | -4.157 | -1.889 | -3.502 | -0.944 | -2.034 | 319587        | NA       | NR_030689_3_-1       |
| E330033B04Rik  | 0.834  | 0.931  | 2.295  | 2.451  | 1.711  | 1.484  | 1.803  | 1.559  | 1.241  | 1.794  | 319722        | NA       | NR_030690_15_-1      |
| A930011G23Rik  | -4.981 | -4.981 | -3.655 | -3.258 | -3.006 | -1.779 | -1.875 | -1.957 | -4.981 | -4.981 | 319818        | NA       | NR_030692_5_-1       |
| 4930412C18Rik  | -4.981 | -4.981 | -3.737 | -3.567 | -4.980 | -4.913 | -3.509 | -4.972 | -2.230 | -2.969 | 320152        | NA       | NR_030693_4_+1       |
| 1110002L01Rik  | 1.660  | 1.794  | 1.837  | 1.654  | 0.967  | 1.313  | 0.680  | 1.317  | 0.694  | 1.020  | 100043040     | NA       | NR_030694_12_-1      |
| B330016D10Rik  | 3.307  | 2.642  | 2.461  | 1.851  | 1.940  | 2.108  | 1.907  | 1.653  | 2.217  | 1.968  | 320456        | NA       | NR_030695_4_+1       |
| 9930014A18Rik  | -2.739 | -1.419 | -4.729 | -1.539 | -0.179 | -0.001 | -0.809 | -1.315 | 0.655  | -0.511 | 320469        | NA       | NR_030696_15_+1      |
| A630066F11Rik  | 3.769  | 2.169  | 1.908  | 0.649  | 1.979  | 1.009  | 1.678  | 0.642  | 2.179  | 0.102  | 320642        | NA       | NR_030698_10_+1      |
| A630072M18Rik  | 3.735  | 2.930  | 3.530  | 3.519  | 1.602  | 1.861  | 1.751  | 1.963  | 1.719  | 1.276  | 320770        | NA       | NR_030699_5_+1       |
| 4831440E17Rik  | 0.073  | 0.528  | -0.141 | -0.189 | 0.834  | 1.221  | 0.474  | 0.017  | 0.794  | 0.241  | 320965        | NA       | NR_030700_5_+1       |
| Snord104       | -4.981 | -4.981 | -2.564 | -3.251 | -4.033 | -4.069 | -3.309 | -3.726 | -3.322 | -4.227 | 100216537     | NA       | NR_030703_11_+1      |
| Snord55        | -3.189 | -4.981 | -4.984 | -4.144 | -3.994 | -4.858 | -4.979 | -4.975 | -4.981 | -4.981 | 100216533     | NA       | NR_030704_4_-1       |
| 6820431F20Rik  | 5.796  | 5.788  | 6.480  | 5.799  | 6.797  | 6.486  | 6.412  | 6.107  | 6.423  | 6.643  | 547150        | NA       | NR_030708_8_-1       |
| Gm16386        | 0.413  | 0.019  | 0.279  | 0.233  | -0.329 | -0.161 | -1.273 | -0.558 | -2.292 | -1.548 | 100042679     | NA       | NR_030709_17_-1      |
| Rtel1          | -0.703 | -0.404 | -0.518 | -0.852 | -0.792 | -0.769 | -0.092 | 0.188  | 1.385  | 0.166  | 269400        | RTEL1    | NR_030710_2_+1       |
| Mir22hg        | 4.206  | 4.037  | 3.393  | 3.380  | 3.140  | 3.180  | 3.270  | 3.541  | 5.227  | 4.930  | 100042498     | NA       | NR_030711_11_+1      |
| 3930402G23Rik  | -1.598 | -2.681 | -3.572 | -3.956 | -1.774 | -2.335 | -3.304 | -3.154 | -4.981 | -4.981 | 665306        | NA       | NR_030715_8_-1       |
| F630028O10Rik  | 2.351  | 2.900  | 5.729  | 5.149  | 3.571  | 4.164  | 4.348  | 4.840  | 4.900  | 5.606  | 100038363     | NA       | NR_030718_X_+1       |
| Gm8979         | -1.891 | 1.676  | -1.433 | 0.740  | -1.817 | 1.273  | -1.680 | 2.642  | -0.065 | 3.921  | 668108        | NA       | NR_030719_7_-1       |
| Gm8989         | -4.981 | -0.595 | -4.918 | -3.799 | -4.979 | -4.977 | -4.981 | -4.981 | -4.458 | -4.981 | 668128        | NA       | NR_030720_7_-1       |
| Gm8989         | -4.981 | -1.682 | -4.918 | -3.799 | -4.980 | -4.978 | -4.981 | -4.981 | -4.458 | -4.981 | 668128        | NA       | NR_030720_dup1_7_-2  |
| Foxd2os        | 1.792  | 0.308  | 0.454  | -0.610 | 0.992  | -1.109 | 0.932  | -0.237 | 1.494  | 0.766  | 100040736     | NA       | NR_030721_4_+1       |
| Ptf21b         | -2.362 | -4.981 | -2.023 | -0.920 | -2.069 | 0.255  | -2.727 | -2.619 | -4.379 | -1.666 | 271305        | PHF21B   | NR_030731_15_-1      |
| 2410006H16Rik  | 6.952  | 6.668  | 6.553  | 5.774  | 6.277  | 5.855  | 6.849  | 6.300  | 6.048  | 5.590  | 69221         | NA       | NR_030738_11_+1      |
| Snord17        | -1.188 | -0.663 | -2.030 | -2.886 | -2.007 | -3.424 | -2.914 | -3.138 | -3.823 | -3.210 | 100313519     | NA       | NR_030762_2_-1       |
| Smok4a         | -4.981 | -4.981 | -4.954 | -4.772 | -3.748 | -4.458 | -4.978 | -4.498 | -4.981 | -4.981 | 272667        | NA       | NR_030763_17_+1      |
| 2700097O09Rik  | 2.319  | 1.976  | 3.198  | 2.615  | 2.275  | 1.535  | 1.085  | 0.944  | 0.792  | -0.459 | 72658         | NA       | NR_030764_12_-1      |
| Gm13034        | -4.981 | -4.981 | -4.726 | -4.769 | -4.741 | -4.824 | -4.553 | -4.697 | -3.980 | -4.024 | 627585        | NA       | NR_030771_4_+1       |
| 3110021A11Rik  | -4.981 | -2.681 | -2.100 | -2.929 | -4.970 | -4.970 | -3.192 | -2.606 | -4.981 | -4.227 | 67289         | NA       | NR_030776_6_+1       |
| Zfp326         | 2.089  | 2.205  | 2.271  | 1.389  | 1.449  | 1.687  | 2.549  | 1.756  | 1.495  | 0.984  | 54367         | ZNF326   | NR_030777_5_+1       |
| Ankrd10        | 1.839  | 2.616  | 1.315  | 0.248  | 1.691  | 0.916  | 0.782  | 0.817  | 0.995  | -0.195 | 102334        | ANKRD10  | NR_030781_8_-1       |
| Syce2          | 1.504  | 0.606  | 1.418  | 1.588  | 1.628  | 1.099  | 2.250  | 1.561  | -0.384 | -0.878 | 71846         | SYCE2    | NR_031759_8_+1       |
| Rmi1           | 3.443  | 3.470  | 2.578  | 3.739  | 3.511  | 3.287  | 2.799  | 2.837  | 2.854  | 3.300  | 74386         | RMI1     | NR_031761_13_+1      |
| Gm3020         | -2.308 | -4.981 | -3.203 | -4.943 | -4.537 | -1.586 | -4.974 | -4.736 | -4.981 | -4.981 | 100040880     | NA       | NR_033117_14_+1      |
| Gm3020         | -2.308 | -4.981 | -3.203 | -4.943 | -4.627 | -2.993 | -4.974 | -4.736 | -4.981 | -4.981 | 100040880     | NA       | NR_033117_dup1_14_+2 |
| Gm10409        | -4.868 | -3.063 | -4.393 | -4.831 | -4.894 | -0.189 | -4.956 | -3.687 | -4.981 | -4.981 | 100041530     | NA       | NR_033121_14_+2      |
| Gm10409        | -4.868 | -3.063 | -4.393 | -4.831 | -4.919 | -1.096 | -4.956 | -3.687 | -4.981 | -4.981 | 100041530     | NA       | NR_033121_dup1_14_+1 |
| 4933409K07Rik  | 2.865  | 2.587  | 2.288  | 2.897  | 2.476  | 2.242  | 2.826  | 2.367  | 2.896  | 1.563  | 108816        | NA       | NR_033123_4_+1       |
| 4933409K07Rik  | 3.448  | 3.155  | 3.475  | 2.258  | 2.479  | 2.590  | 1.952  | 2.268  | 2.749  | 3.256  | 108816        | NA       | NR_033123_dup1_4_-1  |
| Plscr3         | 0.701  | -0.220 | 1.473  | 2.060  | 1.441  | 1.510  | 0.566  | 2.100  | 3.238  | 3.693  | 70310         | PLSCR3   | NR_033133_11_+1      |
| Atf5           | -1.339 | -4.022 | -3.914 | -3.091 | -1.117 | -2.737 | -3.204 | -2.248 | -1.312 | -2.576 | 107503        | ATF5     | NR_033136_7_-1       |
| Zfp57          | -4.981 | -4.981 | -1.434 | 0.230  | -2.026 | -0.646 | -4.749 | -4.632 | -4.981 | -4.981 | 22715         | ZFP57    | NR_033137_17_+1      |
| Al427809       | -1.689 | -0.363 | -3.171 | -3.820 | -4.908 | -3.030 | -3.065 | -0.080 | -4.981 | -3.583 | 381524        | NA       | NR_033139_4_-1       |
| Al427809       | -4.357 | -4.440 | -4.949 | -4.909 | -4.979 | -4.975 | -4.821 | -4.863 | -4.981 | -4.869 | 381524        | NA       | NR_033140_4_-1       |
| Ctps2          | 1.008  | -3.373 | -1.297 | -4.682 | -2.764 | -2.382 | -4.015 | -4.775 | -3.859 | -4.189 | 55936         | CTPS2    | NR_033143_X_+1       |
| 4921524J17Rik  | -0.596 | 0.769  | -0.251 | -0.856 | -0.751 | -0.685 | -0.376 | -0.693 | -1.967 | -1.328 | 66714         | C16orf87 | NR_033144_8_-1       |
| Dand5          | 3.695  | 3.424  | 1.523  | 1.512  | 2.588  | 2.457  | 2.329  | 2.017  | 1.967  | 2.662  | 23863         | DAND5    | NR_033145_8_-1       |
| Record_removed | 2.808  | 5.608  | 3.536  | 4.512  | 3.720  | 4.496  | 3.089  | 4.464  | 2.241  | 2.695  | Record_remove | NA       | NR_033146_12_-1      |
| D830046C22Rik  | -1.327 | -0.710 | -1.717 | -1.570 | -2.486 | -3.111 | -0.414 | -0.031 | 0.605  | 0.266  | 320197        | NA       | NR_033147_5_+1       |
| Gm20605        | 3.648  | 3.218  | 4.609  | 4.606  | 5.830  | 5.582  | 5.558  | 5.513  | 6.278  | 6.279  | 100316903     | NA       | NR_033148_5_+1       |
| Snora28        | -2.304 | -3.408 | -2.025 | -2.183 | -2.375 | -2.886 | -1.729 | -3.507 | -1.943 | -1.584 | 100316932     | NA       | NR_033168_12_+1      |

|               |        |        |        |        |        |        |        |        |        |        |           |             |                 |
|---------------|--------|--------|--------|--------|--------|--------|--------|--------|--------|--------|-----------|-------------|-----------------|
| Krit1         | 2.855  | 2.550  | 2.384  | 1.440  | 2.373  | 2.344  | 1.442  | 1.945  | 2.310  | 2.008  | 79264     | KRIT1       | NR_033173_5_+1  |
| Rcbtb2        | 2.672  | 4.291  | 3.157  | 4.199  | 1.173  | 2.138  | 1.864  | 3.701  | 2.918  | 4.152  | 105670    | RCBTB2      | NR_033185_14_+1 |
| 4933427E11Rik | -4.981 | -1.736 | -4.066 | -2.668 | -3.751 | -3.657 | -3.903 | -4.277 | -4.981 | -2.733 | 66769     | NA          | NR_033197_15_+1 |
| 2700046G09Rik | 2.986  | 2.256  | -0.197 | -1.670 | -2.421 | -3.880 | -0.152 | -1.901 | -1.459 | -2.601 | 67188     | NA          | NR_033198_19_+1 |
| 1700001G17Rik | -0.527 | 0.660  | -2.236 | -2.172 | -1.235 | -1.777 | -1.094 | -0.772 | -2.078 | -0.830 | 67503     | NA          | NR_033199_1_+1  |
| Tslp          | -3.385 | -2.883 | 0.068  | 1.841  | -3.334 | -2.990 | -2.214 | 0.139  | 0.012  | 1.616  | 53603     | TSLP        | NR_033206_18_+1 |
| 2010016118Rik | 3.497  | 3.527  | 2.913  | 3.336  | 1.707  | 1.804  | 0.621  | 2.336  | 0.809  | 1.773  | 69206     | NA          | NR_033207_3_-1  |
| Plppr3        | 0.234  | -1.458 | -4.576 | -4.961 | -3.775 | -4.924 | -4.696 | -4.932 | 1.282  | 0.363  | 216152    | PLPPR3      | NR_033210_10_-1 |
| B430212C06Rik | -0.269 | -0.994 | -0.949 | -1.598 | -1.292 | -1.930 | -0.939 | -1.058 | -0.506 | -0.416 | 338360    | NA          | NR_033214_18_-1 |
| 3000002C10Rik | 2.443  | 2.115  | 0.441  | 0.530  | 0.036  | 0.207  | -0.845 | -0.610 | -2.154 | -2.805 | 378954    | NA          | NR_033215_9_-1  |
| Rreb1         | -0.231 | -0.354 | 0.453  | -0.593 | -0.393 | 0.028  | -1.358 | -0.742 | 1.416  | 1.703  | 68750     | RREB1       | NR_033218_13_+1 |
| BC020402      | -0.041 | 1.193  | 0.308  | 0.431  | -0.073 | -0.174 | 0.439  | 0.193  | -0.598 | -0.142 | 407824    | NA          | NR_033219_10_-1 |
| BC039771      | -2.759 | -1.870 | -2.787 | -3.187 | -0.008 | -0.123 | -2.217 | -1.964 | -3.226 | -4.981 | 408057    | NA          | NR_033220_2_+1  |
| BC031361      | -0.657 | -1.591 | -1.899 | -2.104 | -1.833 | -2.343 | -3.459 | -2.008 | -1.581 | -1.832 | 414072    | NA          | NR_033221_16_-1 |
| 9330151L19Rik | 1.101  | 0.938  | 1.532  | 1.021  | 1.006  | 1.380  | 1.193  | 2.017  | 1.833  | 1.982  | 414085    | NA          | NR_033222_12_+1 |
| Aanat         | -4.553 | -4.981 | -4.981 | -4.981 | -4.981 | -4.981 | -4.975 | -4.964 | -4.981 | -4.941 | 11298     | AANAT       | NR_033223_11_+1 |
| D330050116Rik | 3.093  | 2.068  | 1.492  | 0.190  | 1.210  | 1.113  | 1.533  | 0.990  | 0.718  | -0.554 | 414115    | NA          | NR_033224_19_+1 |
| Gm13375       | 0.917  | 1.046  | 0.221  | -0.321 | -1.770 | -1.887 | -1.920 | -1.513 | -1.722 | -0.827 | 433408    | NA          | NR_033225_2_+1  |
| E030024N20Rik | 2.584  | 2.930  | 2.732  | 3.000  | 2.981  | 3.046  | 2.832  | 2.045  | 2.220  | 2.051  | 595139    | NA          | NR_033228_19_+1 |
| Bmp1          | -4.981 | -4.762 | -1.263 | -2.084 | 0.392  | 0.280  | -3.061 | -3.062 | -4.964 | -4.972 | 12153     | BMP1        | NR_033241_14_-1 |
| Prr33         | 0.463  | 1.241  | 2.268  | 1.634  | 2.065  | 1.708  | 1.387  | 0.916  | 2.164  | 1.699  | 677289    | NA          | NR_033261_7_-1  |
| 9530091C08Rik | -3.485 | -3.151 | -2.467 | -3.145 | -2.446 | -3.345 | -4.019 | -3.964 | -2.879 | -3.746 | 320440    | NA          | NR_033299_9_+1  |
| Slc22a13b-ps  | -2.842 | -4.981 | -2.468 | -2.252 | -2.153 | -4.005 | -2.660 | -3.529 | -2.552 | -3.205 | 109280    | NA          | NR_033303_9_-1  |
| AA388235      | -4.981 | -2.681 | -4.481 | -4.668 | -3.754 | -4.363 | -4.565 | -4.620 | -4.190 | -3.346 | 433100    | NA          | NR_033305_17_+1 |
| Ndufs6        | 3.541  | 2.698  | 2.944  | 1.668  | 2.149  | 1.503  | 3.131  | 1.711  | 2.843  | 0.823  | 407785    | NDUFS6      | NR_033306_13_-1 |
| 4930592I03Rik | -2.948 | -4.981 | -3.699 | -4.044 | -4.641 | -3.558 | -3.094 | -4.998 | -4.981 | -3.853 | 75853     | NA          | NR_033307_18_-1 |
| Arid5a        | 3.304  | 3.396  | 0.335  | 0.041  | 0.843  | 1.090  | 1.069  | 1.903  | 3.756  | 3.213  | 214855    | ARID5A      | NR_033310_1_+1  |
| BC065397      | 1.410  | -0.059 | 1.173  | -0.255 | 0.027  | -0.678 | -0.222 | -0.762 | -1.560 | -2.605 | 436230    | NA          | NR_033324_X_+1  |
| Gm12216       | 2.043  | 1.979  | 1.807  | 1.332  | 1.104  | 1.161  | 0.356  | -0.242 | 0.671  | -1.031 | 622459    | NA          | NR_033332_11_-1 |
| Snora23       | -4.981 | -4.981 | -4.137 | -4.736 | -3.835 | -4.874 | -3.804 | -4.711 | -4.981 | -3.435 | 100379145 | NA          | NR_033336_7_+1  |
| B930059L03Rik | 1.723  | 2.326  | 0.259  | 1.416  | 0.577  | 1.833  | 0.612  | -0.038 | 0.461  | 0.135  | 319786    | NA          | NR_033340_12_+1 |
| Gm3002        | 0.918  | -0.720 | -0.590 | -3.237 | -2.312 | 2.029  | -3.889 | -3.106 | -4.981 | -4.981 | 100040852 | NA          | NR_033388_14_+1 |
| Gm9159        | -0.273 | 0.335  | -2.454 | -3.516 | -3.063 | -1.909 | -1.874 | -3.390 | -2.070 | -1.765 | 668415    | NA          | NR_033398_X_+1  |
| Tyms          | 0.028  | -1.070 | 1.174  | 1.653  | 1.907  | 1.193  | 0.688  | -0.289 | -4.529 | -2.147 | 22171     | TYMS        | NR_033402_5_-1  |
| 2900079G21Rik | -3.843 | -2.124 | -4.947 | -4.163 | -4.960 | -4.554 | -4.981 | -4.981 | -4.981 | -4.981 | 620760    | NA          | NR_033431_9_+1  |
| Orc4          | 1.919  | 3.188  | 2.151  | 1.672  | 2.051  | 2.115  | 1.798  | 1.885  | 1.811  | 2.130  | 26428     | ORC4        | NR_033442_2_-1  |
| Slx1b         | 0.993  | 0.698  | -1.481 | 0.499  | 0.551  | 0.589  | -0.307 | -0.412 | -0.798 | 0.471  | 75764     | SLX1A SLX1B | NR_033446_7_-1  |
| Serpina3h     | -2.175 | -4.981 | -3.557 | 0.379  | -3.913 | -0.611 | -4.895 | -0.912 | -4.981 | -1.898 | 546546    | NA          | NR_033450_12_+1 |
| Klra13-ps     | -4.981 | -0.754 | 0.913  | -1.722 | -4.135 | -3.785 | -4.545 | -3.946 | -2.780 | -4.981 | 16631     | NA          | NR_033451_6_-1  |
| Gm4013        | 2.556  | 2.267  | 1.431  | 0.794  | 0.987  | 0.653  | 1.366  | 0.778  | 1.172  | 0.505  | 100042757 | NA          | NR_033452_18_-1 |
| Gm6225        | 1.042  | 0.023  | 1.529  | 0.981  | 1.218  | 2.017  | 0.950  | -0.617 | 0.535  | 0.327  | 633947    | NA          | NR_033457_18_+1 |
| Zfp133-ps     | -2.443 | -0.791 | -2.034 | -3.402 | -2.229 | -1.167 | -2.859 | -3.972 | -4.981 | -1.767 | 668917    | NA          | NR_033459_2_+1  |
| AU019990      | -2.686 | -1.733 | -3.373 | -4.363 | -1.713 | -2.831 | -2.679 | -3.302 | -1.654 | -2.618 | 767814    | NA          | NR_033468_2_+1  |
| AU019990      | -4.981 | -4.981 | -1.903 | -1.896 | -2.873 | -1.673 | -1.774 | -3.545 | -0.777 | -1.426 | 767814    | NA          | NR_033469_2_+1  |
| Gm10768       | -3.090 | -4.981 | -3.314 | -4.120 | -3.585 | -4.987 | -2.490 | -4.887 | -2.331 | -4.981 | 100038628 | NA          | NR_033472_19_+1 |
| Platr8        | -4.981 | -4.981 | -4.202 | -4.917 | -4.919 | -4.972 | -4.725 | -4.592 | -4.190 | -4.342 | 100038454 | NA          | NR_033473_2_-1  |
| Gm10789       | -3.843 | -2.600 | -2.253 | -2.247 | -3.530 | -2.594 | -3.118 | -4.304 | -2.569 | -4.342 | 100038709 | NA          | NR_033476_16_+1 |
| Fmr1os        | -4.981 | -4.981 | -4.981 | -4.981 | -3.367 | -4.824 | -4.983 | -4.867 | -4.981 | -4.981 | 100038638 | NA          | NR_033481_X_-1  |
| Gm10046       | -4.981 | -3.267 | -4.976 | -4.459 | -4.173 | -4.985 | -4.796 | -4.515 | -4.981 | -4.981 | 100043229 | NA          | NR_033484_7_+1  |
| 4931406H21Rik | -1.835 | 0.549  | 1.817  | 0.987  | 0.173  | 0.198  | 0.688  | 0.835  | 2.311  | 1.539  | 77592     | NA          | NR_033492_14_+1 |
| Tnk2os        | -4.981 | -4.981 | -4.785 | -4.675 | -4.875 | -4.042 | -4.961 | -4.864 | -4.981 | -4.981 | 675921    | NA          | NR_033493_16_-1 |
| Lrp8          | 1.866  | 0.334  | -0.584 | -3.907 | -0.901 | -1.347 | -1.482 | -2.461 | -1.662 | -0.158 | 16975     | LRP8        | NR_033496_4_+1  |
| AI504432      | 4.132  | 4.467  | 1.411  | 1.743  | 2.161  | 0.988  | 2.793  | 2.820  | 1.955  | 2.291  | 229694    | NA          | NR_033498_3_+1  |
| Gm8773        | -4.981 | -4.981 | -1.651 | -4.949 | -1.422 | -4.918 | -0.665 | -4.866 | -4.981 | -4.981 | 667705    | NA          | NR_033499_5_+1  |
| E530011L22Rik | 0.442  | 0.573  | -1.168 | -1.103 | -0.728 | -1.629 | -0.745 | -1.500 | -0.935 | -1.624 | 320301    | NA          | NR_033503_9_-1  |
| Gm3893        | -1.835 | -1.961 | -2.270 | -1.753 | -1.273 | -4.198 | -1.573 | -3.444 | -2.073 | -2.993 | 100042539 | NA          | NR_033506_4_+1  |
| Gm11110       | 2.689  | 3.010  | 1.076  | 1.340  | 0.768  | 0.943  | 0.850  | 1.048  | -1.944 | -2.108 | 100169874 | NA          | NR_033508_17_-1 |
| Gm9961        | -4.981 | -3.408 | -4.519 | -4.956 | -4.945 | -3.140 | -4.910 | -4.909 | -4.981 | -4.981 | 791359    | NA          | NR_033509_16_+1 |
| 1500017E21Rik | -1.996 | -2.239 | -3.240 | -4.027 | -3.240 | -3.662 | -2.925 | -3.400 | -4.970 | -4.981 | 668215    | NA          | NR_033510_19_-1 |
| Gm10510       | -1.476 | -2.895 | -4.981 | -4.981 | -4.981 | -4.981 | -4.981 | -4.981 | -4.981 | -4.981 | 100038481 | NA          | NR_033511_17_-1 |
| Gm6793        | 7.442  | 7.182  | 7.567  | 7.519  | 7.518  | 7.304  | 7.041  | 7.004  | 6.403  | 6.143  | 627828    | NA          | NR_033513_2_+1  |
| 2310015A10Rik | 3.043  | 3.489  | 2.616  | 2.748  | 2.571  | 2.621  | 3.176  | 2.928  | 1.936  | 2.509  | 69548     | NA          | NR_033514_12_-1 |
| 2410017I17Rik | -4.981 | -4.981 | -3.242 | -4.042 | -3.895 | -4.471 | -3.815 | -4.868 | -3.491 | -4.342 | 675325    | NA          | NR_033517_17_+1 |
| Tmem181b-ps   | 4.314  | 4.435  | 4.955  | 4.778  | 4.197  | 4.312  | 3.826  | 3.978  | 4.267  | 4.370  | 547127    | NA          | NR_033520_17_-1 |
| 1600029015Rik | -3.525 | -4.981 | -3.927 | -4.646 | -3.708 | -4.541 | -4.667 | -4.969 | -3.437 | -4.165 | 665268    | NA          | NR_033522_9_+1  |
| Gm11517       | -4.981 | -3.222 | -2.754 | -3.639 | -2.656 | -3.109 | -3.844 | -4.039 | -1.323 | -1.821 | 629750    | NA          | NR_033523_11_-1 |
| Wiz           | 1.750  | 1.600  | 1.951  | 2.019  | 2.281  | 1.729  | 1.529  | 1.584  | 2.794  | 2.765  | 22404     | WIZ         | NR_033525_17_-1 |
| Gm16523       | 0.991  | 0.839  | 0.679  | 0.946  | 0.436  | 0.427  | 0.244  | -0.057 | -0.248 | -2.015 | 100042584 | NA          | NR_033526_2_-1  |
| Ccl25         | 0.277  | -0.965 | -1.584 | -1.987 | -0.259 | -1.034 | -1.477 | -1.357 | -0.983 | -1.394 | 20300     | CCL25       | NR_033527_8_+1  |
| Gm7444        | -4.981 | -4.981 | -4.385 | -2.448 | -4.476 | -3.377 | -4.664 | -4.074 | -4.981 | -2.846 | 665005    | NA          | NR_033529_9_+1  |
| Mrpl15        | 0.513  | 0.559  | -0.580 | -1.239 | -0.737 | -2.679 | -0.663 | -1.529 | 0.552  | -0.462 | 27395     | MRPL15      | NR_033530_1_-1  |
| B230206H07Rik | -4.981 | -4.981 | -4.848 | -4.848 | -4.648 | -4.969 | -4.772 | -4.975 | -4.981 | -4.981 | 320871    | NA          | NR_033532_7_-1  |
| Gm10845       | 1.490  | 2.030  | 1.669  | 2.314  | 1.487  | 2.333  | 1.090  | 1.902  | 1.044  | 1.226  | 100038734 | NA          | NR_033535_14_-1 |
| Gm10516       | -0.341 | -1.569 | -3.211 | -4.332 | -2.774 | -4.591 | -3.290 | -4.069 | -0.972 | -3.855 | 100038712 | NA          | NR_033536_1_+1  |

|                |        |        |        |        |        |        |        |        |        |        |               |         |                 |
|----------------|--------|--------|--------|--------|--------|--------|--------|--------|--------|--------|---------------|---------|-----------------|
| F630042J09Rik  | -4.981 | 0.024  | -4.927 | -3.809 | -4.821 | -1.676 | -4.968 | -2.532 | -4.981 | -2.461 | 100038627     | NA      | NR_033540_13_+1 |
| Gm10389        | -4.981 | -3.195 | -3.865 | -3.960 | -3.525 | -4.373 | -3.105 | -3.097 | -2.692 | -2.597 | 100038608     | NA      | NR_033541_15_+1 |
| Gm10636        | -4.981 | -4.981 | -4.981 | -4.981 | -4.113 | -4.919 | -4.356 | -4.958 | -4.981 | -3.853 | 100038607     | NA      | NR_033542_3_-1  |
| Gm16287        | -0.860 | -3.267 | -0.928 | -1.707 | -0.638 | -1.724 | 0.217  | -0.642 | 1.252  | 0.729  | 100038595     | NA      | NR_033543_4_-1  |
| Gm10790        | 4.987  | 5.082  | -1.313 | -1.110 | -3.425 | -2.788 | -3.300 | -1.430 | -3.750 | -2.102 | 100038577     | NA      | NR_033545_13_+1 |
| Gm10684        | -1.263 | -2.028 | -2.643 | -2.453 | -3.210 | -2.983 | -2.732 | -3.520 | -3.550 | -2.394 | 100038468     | NA      | NR_033547_9_-1  |
| D030047H15Rik  | -1.153 | -0.748 | -3.201 | -4.444 | -1.737 | -2.892 | -2.725 | -2.686 | -2.523 | -4.342 | 100037396     | NA      | NR_033548_7_-1  |
| Gm10248        | -4.981 | -4.981 | -4.981 | -4.981 | -4.983 | -4.911 | -4.941 | -4.961 | -4.190 | -4.981 | 791307        | NA      | NR_033550_14_-1 |
| Gm12359        | 0.208  | 0.149  | -0.664 | -1.540 | -1.256 | -1.699 | -0.643 | -0.901 | -0.598 | -0.557 | 100037262     | NA      | NR_033551_11_-1 |
| Gm10125        | -4.981 | -0.750 | -3.350 | -3.776 | -3.802 | -4.115 | -3.542 | -4.932 | -4.981 | -4.981 | 791318        | NA      | NR_033552_18_-1 |
| 1700048O20Rik  | 1.280  | 1.448  | -0.761 | 1.047  | -0.139 | 0.705  | -0.795 | 1.239  | -3.322 | -1.163 | 69430         | NA      | NR_033553_9_+1  |
| D330041H03Rik  | 3.064  | 2.530  | 2.004  | 1.938  | 1.792  | 2.156  | 2.606  | 1.477  | 0.357  | 0.412  | 654822        | NA      | NR_033554_17_-1 |
| F830002L21Rik  | -4.981 | -1.046 | -0.904 | -0.392 | -4.193 | -1.170 | -2.913 | -2.053 | -2.567 | -1.385 | 414125        | NA      | NR_033558_10_+1 |
| Arhgap20os     | -4.981 | -4.981 | -4.981 | -4.981 | -4.986 | -2.630 | -4.981 | -4.981 | -4.981 | -4.981 | 408028        | NA      | NR_033560_9_-1  |
| Rbm3os         | 1.841  | 1.081  | 0.155  | -0.157 | -0.011 | -0.136 | -0.884 | -0.644 | -0.129 | 0.170  | 70226         | NA      | NR_033561_X_+1  |
| Gpx2-ps1       | -0.551 | -2.200 | -2.363 | -2.945 | -2.850 | -3.740 | -1.266 | -3.216 | -4.981 | -4.227 | 14777         | NA      | NR_033563_7_+1  |
| Gm16897        | -3.843 | -4.981 | -4.469 | -4.155 | -2.483 | -4.338 | -2.949 | -3.458 | -4.981 | -4.342 | 320400        | NA      | NR_033564_1_-1  |
| AI507597       | -4.981 | -4.981 | -3.658 | -4.383 | -4.599 | -4.870 | -4.970 | -4.734 | -4.981 | -4.981 | 100165        | NA      | NR_033566_4_+1  |
| E130304I02Rik  | -3.099 | -2.349 | -4.911 | -3.474 | -4.422 | -2.815 | -4.910 | -2.823 | -4.981 | -3.510 | 78547         | NA      | NR_033567_7_+1  |
| 9430041J12Rik  | 0.244  | -0.444 | -4.981 | -4.981 | -4.003 | -4.528 | -3.752 | -4.865 | -4.981 | -4.342 | 77323         | NA      | NR_033568_7_-1  |
| 1810062O18Rik  | -0.402 | -0.875 | -1.871 | -2.240 | -1.138 | -2.603 | -1.606 | -3.223 | -1.766 | -1.948 | 75602         | NA      | NR_033571_14_+1 |
| 4930512B01Rik  | -3.684 | -3.315 | -2.684 | -3.889 | -3.761 | -4.254 | -3.788 | -4.822 | -4.981 | -4.981 | 74724         | NA      | NR_033573_12_+1 |
| Nutf2-ps1      | 6.834  | 6.932  | 7.027  | 7.118  | 6.737  | 6.758  | 6.654  | 6.793  | 5.846  | 5.613  | 100043462     | NA      | NR_033574_8_+1  |
| Cyp4b1-ps2     | -4.981 | -3.408 | -4.526 | -1.105 | -3.887 | -1.316 | -3.168 | -1.001 | -3.189 | -2.047 | 631037        | NA      | NR_033575_4_-1  |
| Record_removed | 2.358  | -3.205 | 10.175 | 5.419  | 6.410  | -1.780 | 4.972  | -0.734 | -3.236 | -4.981 | Record_remove | NA      | NR_033577_15_+1 |
| Gm15645        | 1.016  | 1.719  | 1.177  | 1.057  | 0.907  | 1.229  | 0.641  | 0.665  | 0.247  | -0.273 | 626055        | NA      | NR_033578_7_+1  |
| Adh6-ps1       | -4.981 | -4.981 | -4.972 | -4.972 | -4.301 | -4.788 | -4.416 | -4.712 | -4.981 | -4.342 | 639769        | NA      | NR_033581_3_+1  |
| Cyp4f41-ps     | -1.681 | -4.981 | -2.369 | -4.797 | -2.233 | -2.021 | -3.792 | -2.823 | -3.153 | -4.981 | 77875         | NA      | NR_033585_17_-1 |
| Fam120b        | 6.099  | 6.333  | 5.317  | 5.347  | 5.721  | 5.870  | 5.325  | 5.410  | 5.365  | 5.108  | 67544         | FAM120B | NR_033586_17_+1 |
| Otub2          | -4.607 | -4.568 | -3.543 | -4.839 | -1.412 | -3.886 | -3.328 | -2.504 | -4.690 | -4.897 | 68149         | OTUB2   | NR_033587_12_+1 |
| AY512931       | -3.486 | -4.981 | -2.228 | -4.674 | -4.312 | -4.569 | -4.023 | -4.493 | -2.953 | -4.981 | 434310        | NA      | NR_033588_8_-1  |
| Hmgbl1-rs17    | -2.347 | -0.971 | -3.359 | -2.062 | -3.392 | -2.560 | -4.406 | -2.729 | -3.008 | -2.750 | 628431        | NA      | NR_033589_8_+1  |
| Gm5712         | -4.981 | -2.583 | -4.981 | -4.981 | -4.981 | -4.981 | -4.981 | -4.981 | -4.981 | -4.981 | 435755        | NA      | NR_033594_3_+1  |
| Gm13498        | -0.093 | -4.981 | -4.357 | -4.980 | -3.926 | -4.978 | -4.981 | -4.981 | -4.981 | -4.981 | 227885        | NA      | NR_033595_2_+1  |
| 5730416F02Rik  | -4.981 | -2.616 | -4.559 | -4.574 | -4.976 | -4.844 | -4.946 | -4.892 | -4.981 | -2.976 | 70550         | NA      | NR_033596_X_+1  |
| Record_removed | -0.729 | -0.740 | -0.637 | -0.850 | -0.861 | -1.845 | -1.282 | -2.249 | -1.163 | -0.938 | Record_remove | NA      | NR_033599_12_+1 |
| 4930519F09Rik  | -3.259 | -4.981 | -3.896 | -3.524 | -3.684 | -3.905 | -3.847 | -4.384 | -3.590 | -4.981 | 114676        | NA      | NR_033601_10_-1 |
| Gm5779         | -3.253 | -3.408 | -3.753 | -2.609 | -3.921 | -2.569 | -4.680 | -4.220 | -2.722 | -3.637 | 544707        | NA      | NR_033602_10_+1 |
| Gm5176         | -4.981 | -2.803 | -3.776 | -4.122 | -4.376 | -4.004 | -4.052 | -4.965 | -3.588 | -4.981 | 382421        | NA      | NR_033603_10_+1 |
| 1700084J12Rik  | -4.981 | -3.315 | -4.066 | -4.455 | -4.879 | -4.800 | -4.979 | -4.683 | -3.750 | -4.981 | 73486         | NA      | NR_033608_15_-1 |
| Gm12669        | 5.578  | 5.321  | 5.197  | 5.052  | 4.513  | 4.758  | 4.363  | 4.690  | 4.397  | 4.275  | 620016        | NA      | NR_033611_7_+1  |
| Gm13238        | -2.647 | -4.981 | -4.339 | -4.839 | -3.991 | -4.947 | -3.300 | -4.849 | -2.377 | -4.981 | 236069        | NA      | NR_033612_4_+1  |
| 1700001J11Rik  | -4.981 | -4.981 | -4.708 | -4.427 | -4.960 | -4.840 | -4.978 | -4.941 | -4.981 | -4.981 | 72224         | NA      | NR_033613_9_+1  |
| Rreb1          | 3.260  | 3.694  | -1.036 | 0.029  | 1.138  | 1.307  | 1.156  | -0.500 | -0.807 | -0.663 | 68750         | RREB1   | NR_033615_13_+1 |
| Gm6623         | -1.388 | -1.239 | -1.584 | -0.070 | -2.072 | -0.302 | -1.863 | -0.535 | -1.718 | 1.061  | 625785        | NA      | NR_033619_17_+1 |
| Olfr856-ps1    | 2.446  | 2.402  | 2.648  | 2.284  | 2.624  | 2.939  | 2.280  | 2.347  | 2.092  | 3.408  | 624341        | NA      | NR_033621_9_-1  |
| 5031434O11Rik  | 0.578  | 0.773  | -0.560 | -1.393 | -0.762 | -0.454 | -0.725 | -1.291 | -1.724 | -2.616 | 100039684     | NA      | NR_033624_3_+1  |
| D5Erttd605e    | 2.841  | 2.139  | 1.475  | 1.227  | 0.142  | -0.462 | 1.036  | 0.518  | -0.119 | -1.525 | 100039805     | NA      | NR_033625_5_+1  |
| 1810010D01Rik  | -4.981 | -4.981 | -2.418 | -3.659 | -2.579 | -3.793 | -2.631 | -4.767 | -2.440 | -4.981 | 100040049     | NA      | NR_033626_7_-1  |
| Mfsd4b4        | -3.189 | -2.437 | -2.929 | -2.780 | -1.967 | -2.277 | -3.042 | -2.644 | -0.872 | -1.300 | 213332        | NA      | NR_033628_10_-1 |
| BC021767       | -4.981 | -4.981 | -3.047 | -2.913 | -3.473 | -2.709 | -3.187 | -2.570 | -4.981 | -3.461 | 545551        | NA      | NR_033629_3_-1  |
| Gm5177         | -4.981 | -2.227 | -3.874 | -0.787 | -4.962 | -1.768 | -4.193 | -1.905 | -4.981 | -0.744 | 382450        | NA      | NR_033630_10_+1 |
| 4632428C04Rik  | -3.563 | -4.981 | -1.746 | -1.821 | -4.132 | -4.247 | -0.087 | -1.293 | -1.236 | -1.237 | 100043102     | NA      | NR_033631_16_+1 |
| A630075F10Rik  | -4.981 | -4.981 | -4.423 | -4.646 | -3.603 | -4.464 | -4.811 | -4.444 | -4.487 | -4.459 | 100043910     | NA      | NR_033632_2_-1  |
| A630075F10Rik  | -4.981 | -4.981 | -4.914 | -4.947 | -4.746 | -4.919 | -4.967 | -4.917 | -4.849 | -4.833 | 100043910     | NA      | NR_033634_2_-1  |
| 9130019P16Rik  | -3.002 | -4.981 | -2.670 | -2.069 | -2.274 | -2.047 | -4.814 | -4.499 | -4.981 | -4.981 | 100042056     | NA      | NR_033635_6_-1  |
| Gm4349         | -4.981 | -2.263 | 0.063  | -0.041 | -1.636 | -0.767 | -2.452 | -1.489 | -3.563 | -2.519 | 100043305     | NA      | NR_033637_3_+1  |
| Rps19-ps3      | -0.630 | -0.973 | -0.616 | -0.792 | -0.686 | -0.526 | -0.871 | -0.580 | -1.008 | 0.009  | 277692        | NA      | NR_033639_4_-1  |
| Cmnde          | -4.981 | -4.981 | -4.268 | -4.986 | -3.274 | -4.529 | -3.314 | -4.826 | -4.981 | -4.981 | 71296         | NA      | NR_033641_8_-1  |
| Gm3230         | 0.016  | 0.102  | -1.165 | -1.470 | -1.425 | -1.201 | -0.728 | -0.692 | -0.462 | -0.750 | 100041244     | NA      | NR_033642_2_-1  |
| Vmn2r-ps129    | -2.303 | 0.281  | -0.821 | -0.446 | -1.508 | -1.313 | -2.511 | -2.137 | -2.566 | -1.881 | 665976        | NA      | NR_033648_17_+1 |
| Trim30e-ps1    | -4.981 | -3.408 | -4.893 | -4.602 | -4.940 | -4.856 | -4.884 | -4.459 | -4.981 | -4.227 | 625321        | NA      | NR_033673_7_-1  |
| Ces2d-ps       | -4.981 | -4.981 | -0.310 | -1.318 | -1.897 | -2.689 | -4.935 | -2.802 | -4.981 | -3.853 | 667754        | NA      | NR_033726_8_+1  |
| Rps27          | 3.732  | 3.380  | 3.456  | 3.042  | 3.021  | 3.088  | 3.044  | 3.069  | 2.012  | 1.546  | 57294         | NA      | NR_033727_3_-1  |
| Fbxl12os       | -0.542 | 0.350  | -0.355 | -0.466 | -1.021 | -1.877 | -0.636 | -1.755 | -0.353 | 0.062  | 66662         | NA      | NR_033729_9_+1  |
| E330020D12Rik  | 1.175  | 3.020  | 4.014  | 2.413  | 1.209  | 2.298  | 1.428  | 2.572  | -1.256 | 2.935  | 626058        | NA      | NR_033736_1_-1  |
| Cbwd1          | 2.698  | 3.158  | 2.205  | 2.032  | 2.219  | 2.123  | 1.983  | 1.738  | 0.712  | 0.535  | 226043        | CBWD1   | NR_033744_19_-1 |
| Minos1         | 3.117  | 2.746  | 1.861  | 1.909  | 0.651  | 1.026  | 1.586  | 1.258  | 1.112  | 1.310  | 433771        | MINOS1  | NR_033745_4_-1  |
| 2810001G20Rik  | 3.873  | 3.040  | 1.927  | 1.454  | 1.563  | 1.658  | 1.585  | 1.525  | 1.541  | 1.061  | 66456         | NA      | NR_033780_11_+1 |
| 4921531C22Rik  | 3.653  | 3.392  | 2.227  | 2.488  | 2.334  | 2.853  | 2.183  | 2.098  | 1.238  | 1.876  | 66730         | NA      | NR_033782_2_+1  |
| Bend5          | -0.572 | -4.860 | -2.187 | 0.188  | -0.439 | 1.152  | -0.640 | 1.970  | -4.377 | -4.852 | 67621         | BEND5   | NR_033793_4_+1  |
| Abhd11         | 3.567  | 3.160  | 2.598  | 2.417  | 2.652  | 2.871  | 2.831  | 3.157  | 3.185  | 3.085  | 68758         | ABHD11  | NR_033794_5_+1  |
| Faap20         | 4.196  | 4.384  | 3.363  | 3.170  | 3.807  | 3.601  | 3.380  | 3.293  | 3.340  | 2.990  | 67513         | FAAP20  | NR_033802_4_+1  |
| 6030408B16Rik  | -2.075 | -2.587 | -1.308 | -2.273 | -1.439 | -2.868 | -3.289 | -2.852 | -2.957 | -2.721 | 77717         | NA      | NR_033803_15_+1 |

|               |        |        |        |        |        |        |        |        |        |        |           |          |                 |
|---------------|--------|--------|--------|--------|--------|--------|--------|--------|--------|--------|-----------|----------|-----------------|
| Art2a-ps      | -1.941 | -1.986 | 1.881  | 3.442  | 1.692  | 2.530  | 1.763  | 4.629  | 1.040  | 0.926  | 11871     | NA       | NR_033804_7_-1  |
| Dnajc24       | 1.194  | 1.133  | 0.385  | 0.033  | 0.892  | 0.589  | -0.190 | -0.506 | -0.411 | -0.508 | 99349     | DNAJC24  | NR_033993_2_-1  |
| Lins1         | 0.094  | 1.878  | 1.246  | 0.509  | 0.515  | 1.287  | 0.487  | 0.791  | 1.553  | 1.249  | 72635     | LINS1    | NR_034030_7_+1  |
| 5430416N02Rik | 2.889  | 3.484  | 2.947  | 2.388  | 2.828  | 2.838  | 3.119  | 2.786  | 1.224  | 1.259  | 100503199 | NA       | NR_034038_5_-1  |
| Snora47       | -4.981 | -4.981 | -4.549 | -4.819 | -4.903 | -4.970 | -4.970 | -4.734 | -4.981 | -4.981 | 100217450 | NA       | NR_034043_13_+1 |
| Snora30       | -3.349 | -4.981 | -4.940 | -4.940 | -4.545 | -4.868 | -3.896 | -4.690 | -4.981 | -4.981 | 100217442 | NA       | NR_034045_7_+1  |
| Snora81       | -1.068 | -2.064 | -1.524 | -2.399 | -2.282 | -2.236 | -1.139 | -3.151 | -0.465 | -0.678 | 100217420 | NA       | NR_034048_16_+1 |
| Snora52       | -4.981 | -3.315 | -4.270 | -4.792 | -4.132 | -4.724 | -4.850 | -4.794 | -3.925 | -4.981 | 100217419 | NA       | NR_034049_7_+1  |
| Snora34       | -3.189 | -3.900 | -4.640 | -4.965 | -4.343 | -4.759 | -4.940 | -4.924 | -3.738 | -4.981 | 100217417 | NA       | NR_034051_15_-1 |
| Zfp414        | 4.569  | 4.343  | 3.845  | 3.979  | 3.599  | 3.907  | 4.260  | 4.466  | 4.799  | 4.549  | 328801    | ZNF414   | NR_034153_17_+1 |
| Olfr1372-ps1  | -4.981 | -4.981 | -4.315 | -3.282 | -4.563 | -3.142 | -4.967 | -4.830 | -4.981 | -3.853 | 257871    | NA       | NR_034155_11_-1 |
| Mir692-3      | -4.981 | -3.654 | -3.827 | -4.854 | -4.478 | -4.865 | -4.123 | -4.760 | -3.859 | -4.539 | 100124641 | NA       | NR_035409_13_+1 |
| Mir692-3      | -4.981 | -3.654 | -3.827 | -4.854 | -4.478 | -4.865 | -4.121 | -4.760 | -3.859 | -4.539 | 100124641 | NA       | NR_035409_4_+1  |
| Mir466i       | -2.925 | -4.981 | -3.222 | -4.112 | -3.985 | -4.481 | -4.375 | -4.724 | -4.394 | -4.342 | 100316665 | NA       | NR_035412_13_+1 |
| Mir1898       | -4.981 | -4.981 | -4.681 | -4.837 | -4.616 | -4.978 | -4.963 | -4.949 | -3.738 | -4.981 | 100316684 | NA       | NR_035443_15_+1 |
| Mir1894       | -4.981 | -4.981 | -4.205 | -4.641 | -4.042 | -4.477 | -4.802 | -4.680 | -4.981 | -4.981 | 100316810 | NA       | NR_035445_17_+1 |
| Mir1938       | -3.189 | -4.981 | -3.542 | -4.747 | -3.262 | -4.697 | -2.735 | -4.500 | -3.738 | -3.461 | 100316693 | NA       | NR_035459_12_-1 |
| Mir1982       | -4.981 | -3.315 | -3.398 | -3.712 | -3.635 | -4.450 | -3.799 | -4.360 | -3.738 | -3.882 | 100316778 | NA       | NR_035503_10_+1 |
| Gm14403       | -0.209 | 3.022  | -3.406 | 2.250  | -2.343 | 2.841  | -2.075 | 1.907  | -2.457 | 2.618  | 433520    | NA       | NR_036450_2_+1  |
| Gm4814        | -2.686 | -4.981 | -4.981 | -4.981 | -4.780 | -4.939 | -4.911 | -4.382 | -4.981 | -4.981 | 100502942 | NA       | NR_036451_13_+1 |
| E230016K23Rik | -4.148 | -4.056 | -4.804 | -4.958 | -4.758 | -4.958 | -4.189 | -4.776 | -0.914 | -0.879 | 100504464 | NA       | NR_036452_11_+1 |
| E230016K23Rik | -1.147 | -2.190 | -3.165 | -3.988 | -2.938 | -4.111 | 1.396  | 1.265  | 4.397  | 3.502  | 100504464 | NA       | NR_036453_11_+1 |
| Trp53cor1     | 0.039  | 0.199  | -1.883 | -2.523 | -2.572 | -3.194 | -0.096 | -1.835 | 0.219  | -0.889 | 100504267 | NA       | NR_036469_17_-1 |
| Rps15a-ps4    | -0.044 | -0.253 | 0.643  | -0.013 | -0.038 | -0.552 | 0.265  | -0.228 | 0.070  | -0.590 | 664903    | NA       | NR_036572_4_-1  |
| Chbp          | -1.644 | -4.358 | -4.465 | -3.859 | -0.440 | -0.254 | -1.933 | -2.148 | -2.227 | -2.465 | 100503659 | NA       | NR_036582_10_-1 |
| 1700001K23Rik | -4.981 | -2.997 | -4.981 | -4.981 | -4.005 | -4.683 | -3.379 | -4.880 | -3.750 | -4.342 | 69319     | NA       | NR_036590_19_-1 |
| 6030440G07Rik | -4.981 | -4.981 | -4.320 | -4.888 | -4.859 | -4.912 | -4.754 | -4.932 | -4.981 | -4.981 | 77878     | NA       | NR_036598_12_+1 |
| 4933421O10Rik | 2.583  | 1.653  | 3.461  | 3.032  | 1.993  | 2.208  | 2.125  | 2.201  | 1.973  | 1.636  | 100504166 | NA       | NR_036602_4_-1  |
| Srsf3         | 7.024  | 7.078  | 6.442  | 6.470  | 6.894  | 6.959  | 6.480  | 6.658  | 6.345  | 6.329  | 20383     | SRSF3    | NR_036613_17_+1 |
| Srsf7         | 7.302  | 7.500  | 7.539  | 7.410  | 7.759  | 7.831  | 7.347  | 7.363  | 6.048  | 6.299  | 225027    | SRSF7    | NR_036615_17_-1 |
| Srsf9         | 2.786  | 1.837  | 2.082  | 1.246  | 2.473  | 1.596  | 2.617  | 0.909  | 1.727  | 0.422  | 108014    | SRSF9    | NR_036616_5_+1  |
| Efcab8        | -4.981 | -4.981 | -3.932 | -3.241 | -4.588 | -4.774 | -3.385 | -4.458 | -4.981 | -4.981 | 100504221 | NA       | NR_036629_2_+1  |
| Alg13         | 1.747  | 2.241  | 1.690  | 1.258  | 1.759  | 0.909  | 1.950  | 0.530  | 1.358  | 1.739  | 67574     | NA       | NR_037145_X_+1  |
| Chkb          | 4.018  | 3.510  | 4.315  | 4.178  | 4.078  | 3.789  | 3.763  | 4.017  | 4.518  | 4.436  | 12651     | CHKB     | NR_037153_15_-1 |
| Chkb          | 3.366  | 3.064  | 2.335  | 1.905  | 2.060  | 3.230  | 2.045  | 3.479  | 2.714  | 1.913  | 12651     | CHKB     | NR_037154_15_-1 |
| Gm9855        | 3.742  | 0.028  | 4.751  | 2.870  | 4.209  | 2.359  | 3.972  | 2.467  | 4.716  | 3.312  | 624784    | NA       | NR_037190_10_+1 |
| Mir3064       | -4.981 | -4.981 | -2.561 | -3.690 | -2.834 | -3.757 | -3.428 | -4.665 | -2.720 | -1.995 | 100526469 | NA       | NR_037224_11_-1 |
| Mir3101       | -3.099 | -4.981 | -3.505 | -4.307 | -3.510 | -4.388 | -4.689 | -4.763 | -2.239 | -4.316 | 100526505 | NA       | NR_037283_7_-1  |
| 1810026B05Rik | 7.425  | 7.573  | 6.727  | 6.617  | 7.458  | 7.767  | 6.872  | 6.606  | 5.377  | 5.854  | 69170     | NA       | NR_037569_7_-1  |
| Dcaf11        | 3.757  | 3.656  | 4.175  | 3.340  | 3.388  | 2.904  | 3.817  | 3.287  | 4.571  | 3.754  | 28199     | DCAF11   | NR_037572_14_+1 |
| Angel2        | 2.301  | 1.028  | 1.542  | 0.840  | -0.030 | 0.268  | 1.170  | 1.558  | 2.295  | 0.445  | 52477     | ANGEL2   | NR_037578_1_+1  |
| Angel2        | 2.513  | 2.883  | 2.309  | 1.787  | 1.757  | 1.360  | 1.743  | 1.996  | 3.217  | 3.088  | 52477     | ANGEL2   | NR_037579_1_+1  |
| Magix         | -4.981 | -4.981 | -4.875 | -4.081 | -4.963 | -3.453 | -4.011 | -4.711 | -4.981 | -4.981 | 54634     | MAGIX    | NR_037581_X_-1  |
| Cahm          | 1.668  | 1.009  | 0.368  | 0.711  | 1.205  | 1.718  | 1.561  | 0.482  | 0.580  | 0.391  | 100526796 | NA       | NR_037588_17_+1 |
| Rbm7          | 5.907  | 6.320  | 4.725  | 5.668  | 4.793  | 5.341  | 5.054  | 5.847  | 5.131  | 6.330  | 67010     | RBM7     | NR_037589_9_-1  |
| Wls           | -0.901 | 0.038  | -2.244 | -2.047 | -0.788 | -1.186 | 0.858  | 1.325  | 3.175  | 2.804  | 68151     | WLS      | NR_037590_3_+1  |
| Kat5          | 0.921  | 1.912  | 0.450  | -0.180 | 0.119  | -0.151 | -0.369 | 1.472  | 1.663  | 2.446  | 81601     | KAT5     | NR_037603_19_-1 |
| Pafah1b1      | 1.437  | 3.864  | 1.782  | 2.932  | 1.243  | 2.218  | 1.169  | 1.525  | 1.817  | 2.272  | 18472     | PAFAH1B1 | NR_037610_11_-1 |
| ST5           | -4.981 | -4.297 | -2.647 | -3.204 | -4.965 | -4.972 | -3.045 | -4.040 | -4.981 | -4.981 | 76954     | ST5      | NR_037617_7_-1  |
| Cep57         | 4.507  | 4.397  | 2.361  | 2.450  | 2.338  | 2.245  | 2.441  | 2.838  | 2.286  | 2.405  | 74360     | CEP57    | NR_037622_9_-1  |
| Gm16861       | -0.238 | 0.412  | -0.871 | -1.862 | -0.521 | -0.076 | -1.574 | -0.582 | -1.094 | -2.118 | 100503704 | NA       | NR_037666_16_-1 |
| Snora33       | -4.981 | -4.981 | -4.454 | -4.978 | -4.829 | -4.772 | -4.971 | -4.398 | -4.981 | -4.981 | 100529074 | NA       | NR_037680_10_-1 |
| Gm1968        | -4.981 | -4.981 | -4.980 | -4.582 | -4.396 | -4.973 | -3.233 | -4.294 | -2.898 | -4.981 | 328657    | NA       | NR_037689_16_-1 |
| 4933407L21Rik | -4.981 | -3.408 | -4.784 | -3.990 | -4.975 | -4.931 | -4.963 | -3.357 | -4.981 | -4.981 | 71141     | NA       | NR_037692_1_+1  |
| Adamts10      | 1.250  | 1.856  | 2.487  | 1.340  | 3.357  | 3.082  | 3.590  | 2.706  | 4.977  | 4.644  | 224697    | ADAMTS10 | NR_037707_17_+1 |
| Adamts10      | 1.890  | 2.035  | 0.724  | 1.494  | 2.193  | 2.517  | 2.124  | 2.983  | 3.119  | 3.732  | 224697    | ADAMTS10 | NR_037708_17_+1 |
| Tmem41a       | 0.887  | 1.362  | -1.601 | -0.643 | -1.758 | -0.718 | 0.786  | 1.184  | -0.127 | 1.318  | 66664     | TMEM41A  | NR_037773_16_-1 |
| Atp6v0c-ps2   | 8.862  | 9.099  | 7.272  | 7.431  | 8.222  | 7.630  | 8.354  | 7.806  | 8.060  | 7.904  | 100039636 | NA       | NR_037854_17_-1 |
| Ankrd11       | 4.851  | 4.591  | 4.782  | 5.055  | 5.008  | 5.283  | 4.716  | 4.715  | 4.743  | 4.588  | 77087     | ANKRD11  | NR_037865_8_-1  |
| Luc7l         | 4.258  | 4.408  | 3.102  | 2.995  | 3.977  | 3.953  | 3.379  | 2.602  | 3.209  | 2.425  | 66978     | LUC7L    | NR_037905_17_+1 |
| Luc7l         | 5.153  | 5.604  | 5.338  | 5.027  | 4.985  | 5.099  | 4.664  | 5.027  | 4.929  | 5.105  | 66978     | LUC7L    | NR_037906_17_+1 |
| Icmt          | 0.203  | 1.765  | 1.354  | 1.939  | 0.902  | 2.137  | 1.793  | 1.832  | 2.839  | 3.200  | 57295     | ICMT     | NR_037908_4_+1  |
| Zfa-ps        | -3.057 | -1.892 | -2.592 | -2.885 | -3.895 | -3.911 | -2.724 | -3.638 | -2.289 | -2.917 | 22639     | NA       | NR_037920_10_-1 |
| Lppos         | 2.998  | 2.858  | 0.549  | 0.512  | 1.695  | 2.349  | 1.406  | 1.685  | 0.558  | 1.266  | 68841     | NA       | NR_037954_16_-1 |
| Lockd         | 1.260  | 0.471  | 1.826  | 1.835  | 3.162  | 2.681  | 3.196  | 2.153  | 0.360  | -0.520 | 381822    | NA       | NR_037955_6_+1  |
| Lockd         | -4.981 | -3.085 | -4.925 | -2.335 | -4.942 | -2.461 | -4.749 | -3.070 | -4.981 | -4.981 | 381822    | NA       | NR_037956_6_+1  |
| 1300002E11Rik | 3.107  | 3.638  | 1.339  | 1.422  | 1.883  | 2.296  | 1.296  | 1.839  | -0.174 | 0.062  | 100043489 | NA       | NR_037957_16_+1 |
| 1300002E11Rik | 4.244  | 4.407  | 1.759  | 1.905  | 2.098  | 2.567  | 2.156  | 2.692  | 0.517  | 0.393  | 100043489 | NA       | NR_037958_16_+1 |
| 1600010M07Rik | 3.614  | -1.402 | 7.183  | 3.100  | 7.652  | 4.415  | 7.638  | 3.536  | 5.637  | 2.844  | 69781     | NA       | NR_037959_7_-1  |
| 1600020E01Rik | 4.931  | 4.789  | 3.918  | 3.498  | 4.271  | 4.035  | 3.864  | 3.640  | 3.282  | 3.427  | 72012     | NA       | NR_037960_6_+1  |
| 1600020E01Rik | 0.985  | 2.085  | 0.924  | -0.019 | 0.272  | 1.108  | 0.968  | 0.615  | 0.760  | 0.620  | 72012     | NA       | NR_037961_6_+1  |
| 2610507I01Rik | 2.504  | -4.981 | 2.123  | -4.264 | 2.058  | -3.995 | 2.733  | -2.861 | 4.539  | -0.469 | 72203     | NA       | NR_037964_11_-1 |
| Gm6644        | 7.512  | 7.332  | 7.413  | 7.484  | 7.443  | 7.414  | 7.276  | 7.274  | 6.778  | 6.385  | 626009    | NA       | NR_037965_6_-1  |
| Brd2          | 5.347  | 5.306  | 5.946  | 5.711  | 5.773  | 5.593  | 5.858  | 5.641  | 6.343  | 6.293  | 14312     | BRD2     | NR_037970_17_-1 |

|                |        |        |        |        |        |        |        |        |        |        |               |       |                 |
|----------------|--------|--------|--------|--------|--------|--------|--------|--------|--------|--------|---------------|-------|-----------------|
| Gm20597        | -4.981 | -4.981 | -4.945 | -4.783 | -4.974 | -4.974 | -4.524 | -4.806 | -4.981 | -4.981 | 100502868     | NA    | NR_037973_10_-1 |
| Gm16894        | -2.073 | -1.941 | -2.984 | -3.128 | 0.204  | 0.802  | -0.231 | -1.416 | -0.879 | -2.159 | 100047133     | NA    | NR_037980_1_-1  |
| 9330159M07Rik  | 1.210  | -3.025 | 0.962  | -2.120 | 1.234  | -1.177 | 1.266  | -2.337 | 1.351  | -1.650 | 319673        | NA    | NR_037982_9_-1  |
| 9330159M07Rik  | 1.072  | -1.082 | -3.155 | -2.452 | -1.577 | -2.257 | -1.474 | -3.866 | -0.414 | -2.960 | 319673        | NA    | NR_037983_9_-1  |
| Gm16548        | 3.416  | 2.804  | -2.600 | -3.700 | -2.428 | -3.803 | -2.169 | -2.333 | 0.988  | -0.111 | 100503816     | NA    | NR_037987_1_-1  |
| Gm16701        | -4.981 | -4.981 | -4.981 | -4.981 | -4.981 | -4.981 | -4.989 | -2.655 | -1.719 | -2.601 | 100503962     | NA    | NR_037988_1_-1  |
| Jmjd4          | 0.383  | 0.489  | 1.753  | 1.110  | 1.260  | 1.156  | 0.490  | 0.931  | 1.503  | 1.981  | 194952        | JMJD4 | NR_037992_11_+1 |
| B230216N24Rik  | -2.336 | -1.150 | -2.382 | -2.082 | -2.076 | -3.010 | -2.920 | -3.803 | -1.104 | -0.560 | 78603         | NA    | NR_037993_1_-1  |
| 2310043L19Rik  | -4.981 | -4.981 | -4.981 | -4.981 | -3.612 | -4.424 | -4.802 | -3.780 | -4.981 | -4.981 | 75589         | NA    | NR_037994_1_-1  |
| Hmga2-ps1      | 4.278  | 6.069  | 3.770  | 3.930  | 3.879  | 4.927  | 4.661  | 5.380  | 5.243  | 6.120  | 15365         | NA    | NR_037996_1_-1  |
| D030040B21Rik  | -4.981 | -4.981 | -3.961 | -4.047 | -4.798 | -4.922 | -4.976 | -4.900 | -3.159 | -3.752 | 329101        | NA    | NR_037998_1_+1  |
| 4930558J18Rik  | -4.981 | -4.981 | -0.830 | -1.821 | -1.518 | -2.570 | -2.361 | -4.343 | -4.981 | -3.386 | 75323         | NA    | NR_037999_1_-1  |
| 4933413J09Rik  | -4.981 | -0.933 | -4.173 | -3.958 | -3.362 | -4.433 | -2.966 | -4.351 | -2.396 | -3.459 | 71106         | NA    | NR_038005_14_+1 |
| 9630028B13Rik  | -4.981 | -4.981 | -2.971 | -4.981 | -4.829 | -4.919 | -4.801 | -4.972 | -4.981 | -4.981 | 319562        | NA    | NR_038006_1_-1  |
| 9330162B11Rik  | -4.981 | -4.981 | -4.981 | -4.981 | -4.518 | -2.150 | -4.971 | -4.804 | -4.981 | -4.981 | 320272        | NA    | NR_038007_1_-1  |
| 281040811Rik   | -0.377 | -0.024 | 1.178  | 1.650  | 0.890  | 0.565  | 0.127  | 0.673  | -0.789 | -1.237 | 69941         | NA    | NR_038009_1_-1  |
| C730036E19Rik  | -4.981 | -4.981 | -4.959 | -4.473 | -2.260 | -2.893 | -4.619 | -4.523 | -4.981 | -4.981 | 402734        | NA    | NR_038011_1_+1  |
| Gm17745        | -1.911 | -4.981 | -2.718 | -2.350 | -0.283 | -0.726 | 0.053  | -0.085 | 1.383  | 0.324  | 432488        | NA    | NR_038014_10_+1 |
| Gm16998        | -0.739 | 0.480  | -0.385 | -1.134 | 1.686  | 2.469  | 0.965  | 0.364  | -0.588 | -1.039 | 100502920     | NA    | NR_038016_10_+1 |
| Gm15915        | -2.925 | -2.069 | -4.150 | -4.807 | 0.058  | -4.943 | -3.933 | -4.945 | -2.957 | -4.981 | 100504069     | NA    | NR_038017_10_-1 |
| Gm20125        | -4.981 | -4.981 | -2.271 | -4.871 | -4.992 | -4.953 | -2.964 | -3.313 | -4.981 | -2.993 | 100504235     | NA    | NR_038020_10_-1 |
| Gm15910        | -0.611 | -0.004 | -1.189 | -0.337 | -2.217 | -1.053 | -2.031 | -1.756 | -3.029 | -2.212 | 100504616     | NA    | NR_038023_10_+1 |
| 4933412E12Rik  | -4.821 | -2.169 | 0.022  | -0.996 | 0.900  | -0.096 | -0.407 | -1.762 | -0.875 | -0.308 | 71086         | NA    | NR_038025_10_+1 |
| 4933412E12Rik  | 2.085  | 2.990  | 2.378  | 2.567  | 2.787  | 2.664  | 2.856  | 2.667  | 1.693  | 2.036  | 71086         | NA    | NR_038026_10_+1 |
| B230208H11Rik  | -4.875 | -4.720 | -2.742 | -4.916 | -4.856 | -4.647 | -4.180 | -2.101 | -0.690 | -1.861 | 320273        | NA    | NR_038027_10_-1 |
| B230208H11Rik  | -2.602 | -2.681 | -3.427 | -2.928 | -2.599 | -3.808 | -0.218 | -2.320 | 2.361  | 0.168  | 320273        | NA    | NR_038028_10_-1 |
| 4930562F07Rik  | -4.514 | -4.526 | -4.675 | -4.880 | -4.859 | -4.949 | -4.690 | -4.924 | -4.624 | -4.860 | 75255         | NA    | NR_038030_1_-1  |
| 4930562F07Rik  | 0.236  | -2.062 | 0.883  | 0.294  | 1.302  | 1.053  | 1.086  | 0.828  | 0.108  | 0.329  | 75255         | NA    | NR_038031_1_-1  |
| Gm15663        | -0.818 | -1.972 | -0.506 | -2.510 | -1.984 | -4.366 | -2.596 | -3.336 | -4.981 | -4.227 | 327812        | NA    | NR_038032_10_+1 |
| E130307A14Rik  | 2.778  | 2.448  | 2.193  | 2.174  | 3.173  | 2.735  | 2.590  | 2.208  | 2.802  | 2.278  | 327744        | NA    | NR_038037_10_-1 |
| Hk1os          | 0.631  | -0.182 | -0.064 | -1.323 | 0.570  | -0.980 | -0.347 | -0.702 | 1.410  | 0.472  | 70162         | NA    | NR_038038_10_+1 |
| 1700028116Rik  | -4.981 | -4.981 | -4.708 | -3.101 | -4.870 | -1.658 | -4.892 | -0.423 | -4.981 | -2.993 | 70003         | NA    | NR_038042_10_+1 |
| Gm10033        | 1.514  | 1.643  | 1.640  | 1.329  | 1.383  | 1.677  | 1.804  | 0.511  | 0.768  | 0.853  | 378466        | NA    | NR_038043_8_-1  |
| Gm10033        | 1.019  | 0.727  | 0.441  | 0.372  | 0.676  | 1.092  | 0.346  | 0.109  | 0.130  | -0.053 | 378466        | NA    | NR_038044_8_-1  |
| Yars2          | 2.532  | 2.521  | 2.185  | 1.952  | 2.200  | 2.208  | 2.125  | 2.057  | 1.699  | 0.588  | 70120         | YARS2 | NR_038046_16_+1 |
| D130020L05Rik  | -3.476 | -4.981 | -2.897 | -1.543 | -2.725 | -1.677 | -4.938 | -4.910 | -4.853 | -3.898 | 319760        | NA    | NR_038047_12_+1 |
| D130020L05Rik  | 0.721  | 2.059  | -0.422 | -0.628 | 0.274  | 0.209  | -0.069 | 0.476  | -0.422 | -3.589 | 319760        | NA    | NR_038048_12_+1 |
| D130020L05Rik  | 0.089  | -0.046 | -0.986 | -2.394 | -2.162 | -2.257 | -1.010 | -3.550 | -2.872 | -2.942 | 319760        | NA    | NR_038049_12_+1 |
| D130020L05Rik  | 0.488  | -0.070 | -0.489 | 0.251  | -1.258 | 0.064  | -0.672 | -1.277 | -0.746 | 0.015  | 319760        | NA    | NR_038050_12_+1 |
| 4930546C10Rik  | 0.759  | -0.637 | -3.495 | -4.125 | -4.845 | -4.962 | -4.941 | -4.901 | -4.981 | -4.981 | 78931         | NA    | NR_038051_18_-1 |
| 4930579G18Rik  | -1.174 | -1.941 | -2.339 | -2.101 | -2.030 | -1.798 | -1.333 | -2.424 | -1.072 | -2.515 | 75913         | NA    | NR_038053_14_+1 |
| C030037D09Rik  | -3.099 | -1.736 | -1.004 | -1.605 | -0.960 | -3.200 | -2.714 | -2.637 | -4.981 | -4.316 | 193280        | NA    | NR_038058_11_+1 |
| 5830428M24Rik  | 4.074  | 4.166  | 3.494  | 3.841  | 1.958  | 2.462  | 1.008  | 2.038  | -0.489 | -1.661 | 76062         | NA    | NR_038060_12_-1 |
| Record_removed | 4.185  | 1.182  | 3.562  | 1.546  | 0.813  | -0.251 | 1.203  | 0.743  | -1.368 | -3.924 | Record_remove | NA    | NR_038061_12_-1 |
| Yipf2          | 2.597  | 3.460  | 1.907  | 2.596  | 2.101  | 2.628  | -0.054 | 1.917  | 2.438  | 2.558  | 74766         | YIPF2 | NR_038062_9_-1  |
| Rplp2-ps1      | 3.333  | 3.169  | 3.790  | 3.506  | 3.661  | 3.336  | 4.168  | 3.483  | 2.570  | 2.339  | 665931        | NA    | NR_038063_12_-1 |
| Gm2011         | -1.345 | -1.650 | -1.793 | -2.613 | -2.290 | -2.838 | -1.727 | -3.249 | -1.785 | -2.884 | 100039027     | NA    | NR_038067_3_+1  |
| Snhg4          | 3.181  | 3.316  | 3.777  | 3.168  | 2.216  | 1.996  | 2.691  | 2.415  | 1.209  | 0.871  | 100503380     | NA    | NR_038073_18_+1 |
| Parp6          | 3.123  | 2.872  | 2.876  | 2.743  | 2.935  | 2.817  | 3.109  | 3.084  | 3.687  | 3.726  | 67287         | PARP6 | NR_038074_9_+1  |
| Parp6          | 2.026  | 2.419  | 1.257  | 1.035  | 2.385  | 1.518  | 1.812  | 2.173  | 2.752  | 2.372  | 67287         | PARP6 | NR_038075_9_+1  |
| 1700001G11Rik  | 0.995  | 1.100  | -0.099 | -0.158 | 0.035  | 0.452  | 0.018  | -1.241 | -2.651 | -2.749 | 69303         | NA    | NR_038077_14_-1 |
| Gm38431        | 2.072  | 2.154  | 1.520  | 2.013  | 1.909  | 1.873  | 2.300  | 2.734  | 1.856  | 2.218  | 100568458     | NA    | NR_038081_9_-1  |
| Six3os1        | -4.981 | -4.981 | -4.981 | -4.981 | -3.587 | -4.611 | -4.981 | -4.981 | -4.981 | -4.981 | 100043902     | NA    | NR_038082_17_-1 |
| Six3os1        | -4.981 | -4.981 | -4.981 | -4.981 | -3.126 | -2.737 | -4.981 | -4.981 | -4.981 | -4.981 | 100043902     | NA    | NR_038083_17_-1 |
| Six3os1        | -4.981 | -4.981 | -4.981 | -4.981 | -4.931 | -4.942 | -4.981 | -4.981 | -4.981 | -4.981 | 100043902     | NA    | NR_038084_17_-1 |
| Gm6654         | -0.892 | -1.521 | -0.472 | 0.135  | -0.299 | -0.440 | -0.587 | -1.018 | -2.159 | -1.409 | 626175        | NA    | NR_038089_6_-1  |
| Al506816       | -2.559 | -2.507 | -0.310 | -2.168 | -1.494 | -3.245 | -1.514 | -3.548 | -3.332 | -3.480 | 433855        | NA    | NR_038090_5_-1  |
| Morf4l1-ps1    | 2.525  | 2.579  | 2.266  | 2.104  | 2.044  | 2.101  | 1.945  | 1.439  | 2.015  | 2.011  | 624582        | NA    | NR_038091_16_+1 |
| Gm11696        | 0.228  | 0.167  | 0.186  | 0.450  | -0.743 | -0.216 | -0.741 | -0.419 | -0.484 | 0.520  | 100036768     | NA    | NR_038097_11_-1 |
| Gm14327        | -2.686 | -3.408 | -2.341 | -4.006 | -2.615 | -4.087 | -3.143 | -5.014 | -3.322 | -4.981 | 665205        | NA    | NR_038101_2_+1  |
| Cxcl11         | -4.981 | -4.981 | 0.319  | -0.759 | -4.228 | -2.950 | -2.737 | -3.969 | -3.844 | -4.121 | 56066         | NA    | NR_038116_5_-1  |
| 0610009L18Rik  | 2.892  | 2.243  | 2.708  | 2.133  | 2.197  | 1.836  | 1.898  | 1.459  | 0.963  | 1.034  | 66838         | NA    | NR_038126_11_+1 |
| Tmem132cos     | -4.981 | -4.981 | -4.981 | -4.981 | -2.925 | -4.815 | -4.958 | -4.941 | -4.981 | -4.981 | 67351         | NA    | NR_038127_5_-1  |
| Tmem132cos     | -4.981 | -4.981 | -4.981 | -4.981 | -4.957 | -4.963 | -4.979 | -4.978 | -4.981 | -4.981 | 67351         | NA    | NR_038128_5_-1  |
| Tmem132cos     | -4.981 | -4.981 | -4.981 | -4.981 | -4.981 | -4.981 | -4.981 | -4.981 | -4.981 | -4.981 | 67351         | NA    | NR_038129_5_-1  |
| Epb41l4aos     | 2.903  | 2.279  | 2.121  | 1.379  | 2.116  | 1.902  | 2.732  | 1.606  | 1.313  | 1.016  | 69749         | NA    | NR_038151_18_+1 |
| Epb41l4aos     | -0.383 | -2.180 | -2.351 | -4.027 | -1.366 | -3.268 | -1.186 | -3.013 | -2.380 | -4.981 | 69749         | NA    | NR_038152_18_+1 |
| 1810044D09Rik  | 2.718  | 2.081  | 1.644  | 1.272  | 2.176  | 2.250  | 1.254  | 1.017  | 0.554  | -0.370 | 69798         | NA    | NR_038153_6_+1  |
| 2610020C07Rik  | 0.113  | 0.822  | -0.131 | -0.120 | 0.280  | -0.136 | 0.393  | -0.660 | -0.936 | -0.734 | 69918         | NA    | NR_038156_16_+1 |
| 5730405O15Rik  | -1.492 | -2.587 | -1.305 | -3.495 | -1.492 | -2.089 | -2.394 | -2.785 | -2.093 | -1.974 | 70489         | NA    | NR_038158_X_+1  |
| Stamos         | 1.147  | 1.247  | -2.129 | -1.307 | -1.316 | -1.003 | -0.752 | -1.345 | -1.828 | -2.034 | 70957         | NA    | NR_038162_2_-1  |
| 0610005C13Rik  | -1.224 | -1.521 | -2.704 | -4.566 | -4.962 | -4.876 | -4.366 | -4.974 | -3.925 | -3.855 | 71661         | NA    | NR_038165_7_-1  |
| 0610005C13Rik  | -4.981 | -4.981 | -4.121 | -3.394 | -4.421 | -4.737 | -4.385 | -4.611 | -4.981 | -4.981 | 71661         | NA    | NR_038166_7_-1  |
| 4931403G20Rik  | -4.469 | -4.265 | -2.657 | -4.209 | -3.074 | -4.956 | -3.473 | -4.353 | -4.656 | -4.879 | 70934         | NA    | NR_038172_12_+1 |

|               |        |        |        |        |        |        |        |        |        |        |           |    |                  |
|---------------|--------|--------|--------|--------|--------|--------|--------|--------|--------|--------|-----------|----|------------------|
| 4931403G20Rik | -0.143 | -0.919 | -1.050 | -2.156 | -2.295 | -3.435 | -1.290 | -2.518 | -1.262 | -1.879 | 70934     | NA | NR_038173_12_+_1 |
| 2610206C17Rik | -3.189 | -0.021 | -2.622 | -2.718 | -4.248 | -3.149 | -4.798 | -1.827 | -2.331 | -2.588 | 72495     | NA | NR_038175_7_+_1  |
| C430049B03Rik | -4.981 | -4.981 | -3.617 | -4.553 | -3.102 | -3.010 | -2.534 | -3.309 | -2.928 | -0.449 | 72575     | NA | NR_038184_X_-_1  |
| C430049B03Rik | -4.981 | -4.981 | -4.977 | -4.475 | -4.301 | -3.887 | -4.413 | -3.778 | -2.651 | -2.526 | 72575     | NA | NR_038185_X_-_1  |
| Shhg18        | -0.601 | 2.641  | -4.002 | -2.360 | -4.818 | -1.418 | -2.982 | 0.370  | -4.981 | -4.981 | 100616095 | NA | NR_038186_15_-_1 |
| Cd1d2         | -4.770 | -0.783 | -0.064 | 0.286  | -1.130 | -1.827 | -4.109 | -2.698 | -4.981 | -4.955 | 12480     | NA | NR_038188_3_+_1  |
| AV039307      | -3.090 | -2.275 | -2.979 | -3.182 | -4.860 | -2.943 | -4.744 | -3.081 | -3.637 | -3.419 | 100502700 | NA | NR_038349_2_+_1  |
| AV039307      | -2.573 | -3.254 | -3.926 | -4.561 | -4.203 | -4.878 | -4.546 | -4.926 | -3.790 | -3.612 | 100502700 | NA | NR_038350_2_+_1  |
| Fam187b       | -4.981 | -4.981 | -0.741 | -1.457 | -4.296 | -3.965 | -1.503 | -0.912 | 1.450  | 0.157  | 76415     | NA | NR_038860_7_+_1  |
| Mir5104       | -4.981 | -4.981 | -4.814 | -4.400 | -4.982 | -4.966 | -4.772 | -4.975 | -4.981 | -4.981 | 100628581 | NA | NR_039563_10_+_1 |
| Mir5107       | -2.134 | -1.736 | -0.548 | -1.492 | -0.273 | -0.852 | -1.055 | -1.920 | -3.322 | -3.098 | 100628611 | NA | NR_039567_18_+_1 |
| Gm14405       | -4.981 | -4.981 | -4.746 | -4.960 | -4.981 | -4.981 | -4.720 | -4.972 | -4.439 | -3.511 | 626877    | NA | NR_040256_2_+_1  |
| 2210408F21Rik | 1.395  | 1.426  | -4.882 | -2.217 | -3.042 | -3.734 | -2.767 | -2.268 | -0.741 | -1.341 | 73652     | NA | NR_040257_6_+_1  |
| 2210408F21Rik | 3.374  | 3.628  | -0.090 | 0.901  | -0.543 | -0.479 | 0.974  | -0.219 | 0.360  | 0.957  | 73652     | NA | NR_040258_6_+_1  |
| 2210408F21Rik | 1.963  | 2.850  | -1.788 | -0.713 | -3.409 | -1.735 | -0.518 | -0.499 | -0.536 | 0.193  | 73652     | NA | NR_040259_6_+_1  |
| 2210408F21Rik | -0.696 | -0.987 | -4.885 | -4.026 | -4.869 | -3.998 | -4.974 | -4.672 | -3.878 | -4.978 | 73652     | NA | NR_040260_6_+_1  |
| 2210408F21Rik | 0.810  | 0.988  | -2.927 | -1.649 | -3.079 | -3.838 | -3.334 | -3.249 | -2.342 | -1.222 | 73652     | NA | NR_040261_6_+_1  |
| 2210408F21Rik | -1.457 | -0.790 | -3.630 | -3.866 | -4.963 | -4.963 | -3.811 | -4.910 | -3.930 | -4.981 | 73652     | NA | NR_040262_6_+_1  |
| Smkr-ps       | -0.915 | -4.981 | -2.286 | -4.477 | -1.838 | -3.734 | -2.482 | -4.754 | -0.540 | -4.119 | 76419     | NA | NR_040263_6_+_1  |
| Smkr-ps       | -1.846 | -4.981 | -4.328 | -4.664 | -4.954 | -4.829 | -4.404 | -4.553 | -3.584 | -3.164 | 76419     | NA | NR_040264_6_+_1  |
| 2310001H17Rik | 4.039  | 3.200  | 2.538  | 1.997  | 3.368  | 2.521  | 3.710  | 2.497  | 2.041  | 1.457  | 76432     | NA | NR_040265_6_-_1  |
| 2310001H17Rik | 0.070  | -0.110 | -0.453 | -4.967 | 0.422  | -4.612 | 1.489  | -2.102 | 1.286  | -4.978 | 76432     | NA | NR_040266_6_-_1  |
| 2310001H17Rik | 0.980  | 0.118  | -2.279 | -4.929 | -1.343 | -3.480 | 1.917  | -1.157 | 2.867  | -4.972 | 76432     | NA | NR_040268_6_-_1  |
| Kantr         | 3.785  | 3.178  | 2.758  | 1.684  | 3.332  | 3.471  | 2.699  | 3.105  | 3.360  | 3.697  | 72997     | NA | NR_040269_X_-_1  |
| Kantr         | 1.586  | 1.899  | 1.324  | 0.923  | 1.850  | 0.585  | 2.600  | -0.203 | 0.452  | 3.309  | 72997     | NA | NR_040270_X_-_1  |
| 9330179D12Rik | -2.394 | -4.858 | -3.170 | -3.613 | -1.790 | -1.739 | -3.710 | -4.937 | -4.981 | -4.975 | 77558     | NA | NR_040273_6_+_1  |
| 9330179D12Rik | -0.381 | -2.850 | -3.538 | -2.954 | -1.180 | -2.225 | -1.875 | -3.184 | -4.981 | -4.338 | 77558     | NA | NR_040274_6_+_1  |
| 9330179D12Rik | -1.338 | -2.137 | -2.819 | -3.319 | -3.378 | -3.194 | -3.863 | -3.446 | -4.981 | -4.227 | 77558     | NA | NR_040275_6_+_1  |
| Plxna4os1     | -0.379 | -1.459 | -1.784 | -1.470 | -0.620 | -1.193 | 3.684  | 3.926  | 3.559  | 4.073  | 319849    | NA | NR_040277_6_+_1  |
| E230016M11Rik | 0.044  | -3.133 | 0.396  | -2.662 | -0.865 | -3.690 | -0.618 | -3.671 | 0.898  | -1.329 | 320172    | NA | NR_040278_6_+_1  |
| 3632454L22Rik | -3.901 | -3.836 | -4.535 | -4.831 | -4.665 | -4.409 | -4.691 | -4.876 | -4.870 | -4.728 | 320606    | NA | NR_040281_X_-_1  |
| 3632454L22Rik | -1.593 | -2.402 | -2.810 | -4.209 | -2.695 | -3.979 | -3.384 | -4.238 | -4.485 | -4.069 | 320606    | NA | NR_040282_X_-_1  |
| 3632454L22Rik | -4.981 | -4.981 | -4.699 | -4.349 | -4.973 | -4.876 | -4.784 | -4.959 | -4.981 | -4.981 | 320606    | NA | NR_040283_X_-_1  |
| Lyrm7os       | -4.981 | -4.981 | -3.840 | -3.121 | -4.906 | -4.974 | -4.959 | -4.404 | -4.981 | -4.981 | 432562    | NA | NR_040284_11_+_1 |
| A730020E08Rik | -3.422 | -3.278 | 2.722  | 2.454  | 1.317  | 0.783  | 0.660  | 0.142  | -3.232 | -4.981 | 100504262 | NA | NR_040287_6_-_1  |
| 4933424G06Rik | -4.981 | -4.981 | -4.256 | -4.643 | -2.939 | -3.380 | -2.841 | -3.981 | -4.394 | -3.459 | 71166     | NA | NR_040290_1_+_1  |
| 6430706D22Rik | 3.798  | 2.526  | 4.299  | 2.734  | 5.099  | 3.367  | 5.478  | 2.972  | 5.159  | 3.053  | 78605     | NA | NR_040291_1_-_1  |
| 2310040G24Rik | 3.221  | 3.364  | 5.190  | 4.847  | 2.611  | 2.367  | 3.371  | 3.695  | 2.142  | 2.315  | 381792    | NA | NR_040292_6_-_1  |
| 2310040G24Rik | -0.089 | -0.277 | -2.273 | -2.545 | -3.167 | -1.411 | -4.059 | -3.799 | -2.543 | -1.975 | 381792    | NA | NR_040293_6_-_1  |
| 4930414N06Rik | -3.090 | -2.600 | -4.955 | -4.955 | -4.944 | -4.387 | -4.547 | -4.976 | -4.206 | -3.126 | 73894     | NA | NR_040294_19_-_1 |
| Gm19434       | -4.981 | -4.981 | -0.883 | -2.641 | -0.558 | -0.051 | 0.573  | -1.503 | -3.354 | -1.935 | 100502888 | NA | NR_040296_6_+_1  |
| Gm19757       | 0.840  | 1.383  | 0.672  | 0.817  | 0.680  | 0.989  | 0.094  | 0.731  | 0.431  | 0.528  | 100503536 | NA | NR_040297_6_-_1  |
| Mklin1os      | 0.429  | 0.629  | -4.243 | -1.361 | -1.002 | -0.204 | -1.460 | -2.293 | -3.196 | -1.710 | 100503869 | NA | NR_040300_6_-_1  |
| Gm20362       | -4.027 | -3.854 | -4.282 | -4.980 | -4.679 | -4.845 | -4.978 | -4.971 | -4.462 | -4.981 | 100504701 | NA | NR_040301_6_+_1  |
| Gm20362       | -3.782 | -3.610 | -3.984 | -4.977 | -4.498 | -4.748 | -4.975 | -4.974 | -3.909 | -4.981 | 100504701 | NA | NR_040302_6_+_1  |
| Gm20743       | -2.355 | -2.060 | -4.978 | -4.978 | -4.981 | -4.981 | -4.981 | -4.981 | -4.981 | -4.981 | 433374    | NA | NR_040303_1_+_1  |
| 6720468P15Rik | -4.981 | -4.981 | -4.981 | -4.981 | -4.981 | -4.981 | -4.981 | -4.981 | -4.981 | -4.981 | 78073     | NA | NR_040306_19_+_1 |
| 6720468P15Rik | 1.129  | 1.829  | -4.941 | -4.941 | -1.909 | -1.513 | -1.083 | -1.083 | -0.591 | 0.715  | 78073     | NA | NR_040307_19_+_1 |
| Apol7d        | -4.981 | -4.981 | -4.981 | -4.981 | -4.981 | -4.981 | -4.888 | -3.636 | -1.339 | -1.115 | 100042814 | NA | NR_040308_1_+_1  |
| 1700025B11Rik | -4.981 | -4.981 | -1.643 | -4.914 | -3.933 | -4.928 | -4.479 | -4.995 | -4.981 | -4.981 | 76409     | NA | NR_040310_15_-_1 |
| Mir9-3hg      | -4.981 | -4.981 | -4.813 | -4.953 | -4.892 | -4.958 | -4.981 | -4.981 | -4.981 | -4.981 | 101694    | NA | NR_040311_7_+_1  |
| Mir9-3hg      | -4.981 | -4.981 | -4.755 | -4.968 | -4.725 | -4.928 | -4.980 | -4.981 | -4.981 | -4.981 | 101694    | NA | NR_040312_7_+_1  |
| Mir9-3hg      | -4.981 | -4.981 | -3.743 | -4.909 | -3.302 | -4.835 | -4.978 | -4.979 | -4.981 | -4.981 | 101694    | NA | NR_040313_7_+_1  |
| Mir9-3hg      | -4.981 | -4.981 | -4.876 | -4.583 | -3.562 | -3.629 | -4.957 | -4.969 | -4.981 | -4.981 | 101694    | NA | NR_040314_7_+_1  |
| B230217O12Rik | 0.213  | -2.997 | -1.353 | -3.036 | -2.557 | -1.731 | -0.861 | -1.924 | -1.884 | -1.687 | 320879    | NA | NR_040316_19_-_1 |
| 2500004C02Rik | 2.040  | 1.769  | 1.346  | 0.732  | 0.680  | 0.913  | 0.615  | 0.619  | 0.717  | 1.238  | 72326     | NA | NR_040318_2_-_1  |
| E130018N17Rik | -1.732 | -2.160 | -4.965 | -3.602 | -4.208 | -3.941 | -4.419 | -3.413 | -3.109 | -2.647 | 77017     | NA | NR_040327_2_-_1  |
| 4833419F23Rik | 2.094  | 0.751  | 1.812  | 1.267  | 1.609  | 1.183  | 1.914  | 1.025  | 2.066  | 1.304  | 73915     | NA | NR_040328_18_+_1 |
| E130215H24Rik | 1.020  | 0.562  | -1.060 | -1.832 | 0.579  | 0.650  | 0.666  | 0.062  | 0.071  | -1.040 | 109344    | NA | NR_040331_2_+_1  |
| A930006I01Rik | -1.069 | -1.756 | -3.322 | -0.466 | -0.789 | -1.027 | -0.677 | -0.354 | -4.394 | -3.210 | 319854    | NA | NR_040332_2_-_1  |
| A230108P19Rik | -2.739 | -2.137 | -2.961 | -3.976 | -0.202 | -1.594 | -1.565 | -2.698 | -4.981 | -1.145 | 320132    | NA | NR_040333_2_+_1  |
| D330023K18Rik | 3.287  | 2.286  | 1.362  | 0.765  | 1.690  | 1.233  | 2.364  | 0.757  | 1.629  | 0.939  | 320973    | NA | NR_040334_2_-_1  |
| D330050G23Rik | -4.981 | -4.981 | -4.978 | -4.920 | -4.773 | -4.922 | -4.598 | -4.970 | -4.845 | -4.981 | 320975    | NA | NR_040335_2_+_1  |
| D330050G23Rik | -4.981 | -4.981 | -2.805 | -0.677 | -1.134 | -2.758 | -1.723 | -3.351 | -3.448 | -4.981 | 320975    | NA | NR_040336_2_+_1  |
| Gm16982       | -3.563 | -4.981 | -4.035 | -2.543 | -4.022 | -2.732 | -3.266 | -2.742 | -0.704 | -0.539 | 100036523 | NA | NR_040337_7_-_1  |
| Redrum        | -4.981 | -0.313 | -4.278 | 0.940  | -3.920 | 1.042  | -2.358 | 1.192  | -2.989 | 0.332  | 77433     | NA | NR_040338_18_+_1 |
| Gm19897       | 2.354  | 2.555  | 1.943  | 1.939  | 2.707  | 2.634  | 2.286  | 1.670  | 1.678  | 0.962  | 100503790 | NA | NR_040339_7_-_1  |
| Gm16157       | -2.573 | -4.579 | -4.975 | -4.981 | -4.956 | -4.979 | -4.831 | -4.398 | -4.981 | -4.981 | 100504026 | NA | NR_040340_7_-_1  |
| Gm15880       | -1.987 | -2.097 | -2.513 | -2.389 | -0.043 | -0.005 | -1.558 | -1.193 | -2.239 | -1.443 | 100504375 | NA | NR_040343_7_+_1  |
| 1810019D21Rik | -4.927 | -4.866 | -4.976 | -4.976 | -4.981 | -4.981 | -4.881 | -4.968 | -4.864 | -4.968 | 69771     | NA | NR_040344_8_+_1  |
| 1810019D21Rik | -4.888 | -4.812 | -4.974 | -4.975 | -4.981 | -4.981 | -4.835 | -4.960 | -4.799 | -4.948 | 69771     | NA | NR_040345_8_+_1  |
| 1810019D21Rik | -3.668 | -2.600 | -4.653 | -4.847 | -4.931 | -4.864 | -2.038 | -3.567 | -1.043 | -1.450 | 69771     | NA | NR_040346_8_+_1  |
| Gm20556       | -4.981 | -4.981 | -3.016 | -3.180 | -4.859 | -4.799 | -4.954 | -4.968 | -4.981 | -4.981 | 328576    | NA | NR_040347_15_-_1 |
| 4930473A02Rik | -2.458 | -2.583 | -3.691 | -4.071 | -3.709 | -4.318 | -3.289 | -3.863 | -2.168 | -2.401 | 321014    | NA | NR_040348_2_-_1  |

|               |        |        |        |        |        |        |        |        |        |        |           |    |                     |
|---------------|--------|--------|--------|--------|--------|--------|--------|--------|--------|--------|-----------|----|---------------------|
| Gm19466       | -0.826 | -0.994 | -1.006 | -1.546 | -0.548 | -1.173 | -2.256 | -2.845 | -2.753 | -2.063 | 100502945 | NA | NR_040349_18_+1     |
| Gm5475        | -4.981 | -4.981 | -4.121 | -3.038 | -3.096 | -3.244 | -2.991 | -4.053 | -4.981 | -3.527 | 432982    | NA | NR_040351_15_+1     |
| E030013119Rik | -4.981 | -4.981 | 2.871  | 1.313  | -4.968 | -3.913 | -4.458 | -3.923 | -1.533 | -4.981 | 338535    | NA | NR_040353_2_+1      |
| Znf41-ps      | 3.158  | 2.132  | 2.581  | -2.043 | 2.766  | -1.165 | 3.413  | -0.443 | 3.346  | 1.298  | 70005     | NA | NR_040355_4_+1      |
| Gm13483       | -3.349 | -2.349 | -4.981 | -4.981 | -2.655 | -2.668 | -4.958 | -4.771 | -3.823 | -4.316 | 100502624 | NA | NR_040362_2_+1      |
| 9430091E24Rik | -4.194 | -3.762 | -4.778 | -4.807 | -3.291 | -4.927 | -4.365 | -4.871 | -4.489 | -4.674 | 434350    | NA | NR_040363_8_-1      |
| 9430091E24Rik | 2.072  | 1.785  | -0.174 | 0.792  | 0.594  | 0.764  | -0.074 | 0.870  | 0.552  | 0.408  | 434350    | NA | NR_040364_8_-1      |
| Gm15446       | 1.333  | 0.833  | 0.577  | 0.228  | 0.805  | 0.497  | 0.651  | -0.054 | 0.127  | 0.492  | 100642166 | NA | NR_040366_5_+1      |
| Gm16796       | -3.668 | -3.408 | -2.020 | -4.317 | -3.879 | -4.994 | -3.934 | -4.589 | -3.738 | -4.227 | 100502946 | NA | NR_040367_2_-1      |
| Gm14023       | -0.835 | -4.981 | -1.950 | -1.561 | -2.816 | -4.310 | -2.176 | -3.093 | -0.752 | -1.195 | 100503468 | NA | NR_040371_2_+1      |
| Asb17os       | -4.981 | -1.756 | -3.788 | -0.836 | -4.504 | -0.513 | -3.297 | -0.351 | -4.981 | -2.247 | 72317     | NA | NR_040373_3_-1      |
| B130034C11Rik | -0.649 | -1.360 | -2.772 | -2.337 | -1.835 | -3.908 | -2.101 | -3.158 | -2.356 | -3.758 | 414095    | NA | NR_040375_16_+1     |
| Gm16793       | -1.718 | -1.005 | -2.821 | -1.829 | -4.674 | -3.325 | -4.647 | -3.851 | -3.815 | -1.700 | 100504714 | NA | NR_040376_8_-1      |
| G730013B05Rik | -4.333 | -4.981 | -4.428 | -4.715 | -4.782 | -4.950 | -4.174 | -4.745 | -1.739 | -4.454 | 619312    | NA | NR_040379_16_+1     |
| G730013B05Rik | -1.119 | -4.981 | -1.839 | -2.534 | -2.516 | -4.043 | -0.110 | -1.155 | -3.624 | -1.719 | 619312    | NA | NR_040380_16_+1     |
| 4930520O04Rik | -0.792 | -1.469 | -1.922 | -4.950 | -1.190 | -0.429 | -1.449 | -3.026 | -2.826 | -3.200 | 75116     | NA | NR_040383_9_+1      |
| 4930520O04Rik | -0.397 | -1.144 | -2.750 | -2.828 | -1.602 | -0.986 | -1.720 | -2.191 | -3.710 | -3.166 | 75116     | NA | NR_040384_9_+1      |
| Platr4        | -2.573 | -1.693 | -4.981 | -4.981 | -4.981 | -4.981 | -4.976 | -4.900 | -4.981 | -4.981 | 78706     | NA | NR_040385_3_-1      |
| Al115009      | -2.925 | -0.431 | -4.931 | -4.575 | -4.981 | -4.981 | -4.981 | -4.981 | -4.981 | -4.981 | 99542     | NA | NR_040386_3_+1      |
| Gm10785       | 1.215  | 1.430  | -0.408 | -0.141 | -0.234 | -0.470 | 0.097  | -0.375 | 0.138  | -0.368 | 100038392 | NA | NR_040389_16_+1     |
| A730090N16Rik | -1.774 | -1.953 | -3.744 | -3.286 | -4.401 | -3.523 | -3.010 | -2.845 | -2.898 | -4.227 | 319798    | NA | NR_040390_3_-1      |
| 1700063D05Rik | -4.981 | -3.267 | -4.029 | -3.708 | -3.787 | -4.490 | -4.068 | -4.211 | -4.981 | -4.981 | 78500     | NA | NR_040392_9_+1      |
| D430036J16Rik | -4.981 | -4.981 | -4.981 | -4.981 | -4.981 | -4.981 | -2.792 | -4.542 | -4.981 | -4.981 | 319405    | NA | NR_040393_9_+1      |
| D430036J16Rik | -4.981 | -4.981 | -4.981 | -4.981 | -4.981 | -4.981 | -2.117 | -4.703 | -4.981 | -4.981 | 319405    | NA | NR_040394_9_+1      |
| D430036J16Rik | -4.981 | -4.981 | -4.981 | -4.981 | -4.981 | -4.981 | -2.989 | -4.342 | -4.981 | -4.981 | 319405    | NA | NR_040395_9_+1      |
| D430036J16Rik | -4.981 | -4.981 | -4.981 | -4.981 | -4.981 | -4.981 | -3.998 | -4.615 | -4.981 | -4.981 | 319405    | NA | NR_040396_9_+1      |
| D430036J16Rik | -4.981 | -4.981 | -4.981 | -4.981 | -4.981 | -4.981 | -2.867 | -4.508 | -4.981 | -4.981 | 319405    | NA | NR_040397_9_+1      |
| 4930570G19Rik | -2.483 | -4.981 | -3.462 | -4.904 | -2.035 | -4.245 | -3.136 | -2.530 | -0.676 | -1.597 | 329782    | NA | NR_040398_3_-1      |
| 4930570G19Rik | -0.166 | -4.981 | -4.948 | -4.948 | -3.137 | -4.896 | -2.574 | -4.965 | -1.433 | -4.981 | 329782    | NA | NR_040399_3_-1      |
| 4930570G19Rik | -0.444 | -1.435 | -2.398 | -4.357 | -3.767 | -4.147 | -1.818 | -4.343 | -1.270 | -3.183 | 329782    | NA | NR_040400_3_-1      |
| C920006O11Rik | 2.709  | -0.566 | 0.808  | -3.359 | 1.446  | -3.781 | 1.163  | -2.305 | 1.058  | -2.372 | 320295    | NA | NR_040401_9_+1      |
| Gm19522       | 1.619  | 1.464  | -1.263 | -0.743 | -0.643 | -1.026 | -1.557 | -0.706 | -3.925 | -4.227 | 100503040 | NA | NR_040402_16_-1     |
| Gm15417       | -1.327 | -4.981 | 0.015  | -1.367 | -2.761 | -1.868 | 0.514  | -0.687 | 1.949  | -0.072 | 545539    | NA | NR_040403_3_+1      |
| Gm15417       | -0.921 | -2.616 | 1.949  | 0.053  | 1.104  | -0.991 | 2.191  | 0.725  | 2.134  | 0.596  | 545539    | NA | NR_040404_3_+1      |
| Gm16845       | 1.814  | -3.466 | -0.064 | -1.975 | -2.201 | -3.279 | -2.137 | -2.957 | 1.251  | -1.353 | 100503652 | NA | NR_040406_9_+1      |
| Gm16845       | 1.072  | 2.627  | 0.217  | 1.033  | 0.381  | 0.947  | 0.771  | 0.758  | 0.657  | 1.608  | 100503652 | NA | NR_040407_9_+1      |
| Gm15441       | 0.799  | 0.502  | -0.538 | -0.829 | -0.007 | -0.485 | 0.074  | -0.425 | 1.175  | 0.416  | 100038464 | NA | NR_040409_3_-1      |
| Gm15471       | -3.663 | -2.349 | -2.117 | -2.926 | -2.004 | -4.301 | -2.779 | -3.501 | -1.532 | -1.764 | 100503157 | NA | NR_040412_3_+1      |
| Gm12504       | 2.113  | -0.922 | -1.159 | -1.731 | -1.533 | -2.338 | -1.436 | -2.606 | -1.069 | -0.992 | 623796    | NA | NR_040414_4_+1      |
| 1810021B22Rik | 1.274  | -0.966 | 1.183  | -0.316 | -0.371 | -3.677 | -0.285 | -2.143 | -0.881 | -2.774 | 69120     | NA | NR_040417_15_-1     |
| 2310034G01Rik | 2.191  | -1.404 | 1.420  | 0.467  | 0.879  | -0.114 | 0.843  | -0.742 | 0.711  | -1.783 | 75579     | NA | NR_040418_19_-1     |
| Gm6568        | -3.392 | -4.981 | -4.538 | -4.528 | -4.536 | -4.639 | -3.816 | -4.927 | -4.981 | -4.981 | 625253    | NA | NR_040420_X_+1      |
| Gm15401       | -4.981 | -4.981 | -3.473 | -4.047 | -4.187 | -4.494 | -3.996 | -4.735 | -4.263 | -4.981 | 100038714 | NA | NR_040421_6_+1      |
| Gm15401       | -4.981 | -4.981 | -4.986 | -4.365 | -4.824 | -4.986 | -3.347 | -4.936 | -1.909 | -4.981 | 100038714 | NA | NR_040422_6_+1      |
| Rbakdn        | -3.843 | -4.981 | -4.945 | -4.076 | -4.769 | -4.970 | -4.883 | -4.978 | -4.981 | -4.981 | 100042605 | NA | NR_040424_5_-1      |
| Rbakdn        | -3.663 | -2.600 | -4.939 | -4.939 | -3.875 | -4.754 | -3.989 | -3.410 | -2.519 | -3.853 | 100042605 | NA | NR_040425_5_-1      |
| Rbakdn        | -2.296 | -4.981 | -4.880 | -4.880 | -4.197 | -2.753 | -4.480 | -4.132 | -4.981 | -4.981 | 100042605 | NA | NR_040426_5_-1      |
| Gm15408       | -0.676 | -0.662 | -4.621 | -3.141 | -3.143 | -3.635 | -3.957 | -3.863 | -4.981 | -4.316 | 100503307 | NA | NR_040429_5_+1      |
| Gm15787       | -1.935 | -0.907 | -4.442 | -4.722 | -4.670 | -3.851 | -1.873 | -3.780 | -4.350 | -4.699 | 100504007 | NA | NR_040430_5_-1      |
| Gm15787       | -1.236 | -0.626 | -0.920 | -1.300 | -1.631 | -0.711 | -1.808 | -1.200 | -0.859 | -0.074 | 100504007 | NA | NR_040431_5_-1      |
| Gm15708       | 2.641  | 1.839  | -0.012 | -0.997 | 3.438  | 0.275  | 2.131  | -1.785 | 0.750  | -1.305 | 100504231 | NA | NR_040432_5_+1      |
| E130218I03Rik | -1.683 | -1.790 | -1.603 | -3.069 | -2.630 | -3.599 | -2.985 | -3.760 | -1.669 | -2.662 | 77490     | NA | NR_040435_4_+1      |
| E130218I03Rik | -4.786 | -4.527 | -4.955 | -4.844 | -4.978 | -4.981 | -4.981 | -4.981 | -4.771 | -4.914 | 77490     | NA | NR_040436_4_+1      |
| 3110045C21Rik | 0.836  | 0.003  | -1.559 | -4.534 | -0.928 | -3.925 | -1.773 | -3.550 | -2.310 | -4.981 | 67303     | NA | NR_040438_1_+1      |
| 1810006J02Rik | -3.189 | -4.981 | -4.287 | -3.493 | -3.553 | -3.003 | -3.786 | -2.604 | -4.981 | -3.386 | 69030     | NA | NR_040439_1_+1      |
| Alms1-ps2     | -3.750 | -4.981 | -3.494 | -3.974 | -4.935 | -4.875 | -4.979 | -4.916 | -4.981 | -4.929 | 623273    | NA | NR_040440_6_+1      |
| Gm16023       | 0.118  | 0.086  | 0.474  | 0.192  | 0.144  | -0.465 | -0.039 | -0.112 | -0.157 | -1.171 | 100502734 | NA | NR_040441_4_-1      |
| AV051173      | -0.202 | -1.308 | -0.752 | -1.400 | -1.656 | -1.568 | -1.845 | -1.859 | -1.308 | -1.126 | 100502959 | NA | NR_040442_4_-1      |
| C920021L13Rik | 0.654  | 0.124  | 3.787  | 2.938  | 0.727  | 0.504  | 2.183  | 2.369  | 2.644  | 2.176  | 100042889 | NA | NR_040446_3_+1      |
| 1700047G03Rik | -2.842 | -1.773 | -4.972 | -4.972 | -4.977 | -4.977 | -4.978 | -4.941 | -4.981 | -2.684 | 73339     | NA | NR_040447_15_+1     |
| A430035B10Rik | 6.118  | 5.805  | 2.641  | 1.039  | 1.502  | 0.753  | 1.218  | 1.520  | -0.234 | 1.203  | 320312    | NA | NR_040452_6_-1      |
| Gm17757       | 0.698  | 1.758  | 0.887  | -0.209 | 0.471  | -0.280 | 1.927  | 1.136  | 3.071  | 2.412  | 100417829 | NA | NR_040453_7_-1      |
| Gm17757       | 0.704  | -4.981 | -0.177 | -2.952 | 0.751  | -4.852 | 1.569  | -4.768 | 3.010  | -4.884 | 100417829 | NA | NR_040453_dup1_7_-2 |
| 4933417E11Rik | -4.981 | -4.981 | -4.981 | -4.981 | -4.981 | -4.981 | -4.976 | -4.904 | 0.114  | -0.373 | 71134     | NA | NR_040454_1_-1      |
| Gm18853       | 0.173  | 1.227  | 0.345  | -0.765 | 0.648  | -0.897 | 2.283  | 1.139  | 2.822  | 1.872  | 100417831 | NA | NR_040456_7_-1      |
| Gm18853       | 0.177  | -4.981 | -0.718 | -3.325 | 0.626  | -4.880 | 1.532  | -4.705 | 2.721  | -4.890 | 100417831 | NA | NR_040456_dup1_7_-2 |
| 1700034P13Rik | -2.825 | -1.702 | -1.390 | -0.817 | -1.004 | -1.587 | -1.645 | -2.026 | -1.489 | -1.407 | 73331     | NA | NR_040462_1_+1      |
| 1700066B17Rik | -4.981 | -4.981 | -3.759 | -4.642 | -4.664 | -4.692 | -4.393 | -4.980 | -4.981 | -4.981 | 73426     | NA | NR_040465_1_-1      |
| 5830418P13Rik | -1.839 | -3.142 | -1.379 | -1.081 | -1.483 | -1.282 | -1.838 | -0.387 | -4.981 | -4.981 | 100529079 | NA | NR_040466_9_+1      |
| 5031425E22Rik | 4.480  | 4.326  | 3.914  | 3.666  | 3.998  | 4.419  | 4.443  | 4.106  | 4.353  | 3.896  | 269630    | NA | NR_040469_5_-1      |
| Platr17       | 4.039  | 3.193  | 1.902  | 1.105  | 1.614  | 0.916  | 2.727  | 2.109  | 2.820  | 2.523  | 474160    | NA | NR_040470_17_+1     |
| 1700067G17Rik | -1.910 | -2.437 | -3.794 | -4.941 | -4.599 | -4.704 | -3.749 | -4.973 | -4.981 | -4.981 | 73475     | NA | NR_040471_1_+1      |
| 1700112H15Rik | -3.668 | -4.981 | -4.675 | -4.966 | -3.338 | -4.497 | -3.627 | -4.925 | -4.981 | -4.981 | 73590     | NA | NR_040472_1_-1      |
| 4930565N06Rik | -2.948 | -2.344 | -2.356 | -2.809 | -2.862 | -4.693 | -3.545 | -3.164 | -2.148 | -3.131 | 68306     | NA | NR_040476_16_-1     |

|               |        |        |        |        |        |        |        |        |        |        |           |       |                 |
|---------------|--------|--------|--------|--------|--------|--------|--------|--------|--------|--------|-----------|-------|-----------------|
| 1600002D24Rik | -4.981 | -4.981 | -4.981 | -4.981 | -4.979 | -4.946 | -3.175 | -4.595 | -3.738 | -4.981 | 69776     | NA    | NR_040485_16_-1 |
| 1810053B23Rik | -4.981 | -4.981 | -4.934 | -4.934 | -4.866 | -3.678 | -4.952 | -4.848 | -4.981 | -4.981 | 69857     | NA    | NR_040491_16_-1 |
| 4930405A21Rik | -2.075 | -1.642 | -0.699 | -0.936 | -0.351 | -1.639 | -1.571 | -3.662 | -4.981 | -4.227 | 74846     | NA    | NR_040505_2_-1  |
| 4930545L23Rik | -4.981 | -4.981 | -4.976 | -4.882 | -4.981 | -4.981 | -4.077 | -4.922 | -2.871 | -3.011 | 78805     | NA    | NR_040517_2_-1  |
| Gm4262        | -0.033 | 0.222  | -2.511 | -3.207 | -2.107 | -4.684 | -2.223 | -3.225 | -2.765 | -3.733 | 100043147 | NA    | NR_040518_16_+1 |
| 1700025N23Rik | -4.981 | -2.681 | -2.607 | -2.886 | -4.367 | -4.928 | -2.306 | -3.417 | -1.613 | -2.540 | 69986     | NA    | NR_040523_6_-1  |
| Dbhos         | -0.275 | 0.013  | -0.994 | -0.972 | -1.246 | -0.905 | -1.348 | -1.892 | -1.387 | -1.197 | 329371    | NA    | NR_040524_2_-1  |
| Gm9926        | -4.981 | -4.981 | -4.963 | -4.963 | -4.520 | -4.105 | -4.907 | -4.720 | -4.981 | -4.981 | 100503565 | NA    | NR_040528_18_+1 |
| Gm13807       | -2.317 | -1.833 | -1.597 | -2.944 | -1.852 | -2.278 | -1.901 | -2.854 | -4.981 | -4.981 | 639658    | NA    | NR_040529_2_+1  |
| Gm10804       | -1.926 | -1.805 | -3.953 | -3.921 | -4.233 | -3.719 | -3.392 | -4.867 | -4.981 | -4.981 | 100038525 | NA    | NR_040532_2_+1  |
| Gm10804       | -3.563 | -4.981 | -2.256 | -3.345 | -3.194 | -2.709 | -4.094 | -4.691 | -4.981 | -2.923 | 100038525 | NA    | NR_040533_2_+1  |
| Gm10548       | 1.928  | 2.422  | 0.207  | 0.639  | -0.917 | -1.456 | -1.626 | -1.007 | -1.997 | -1.219 | 633395    | NA    | NR_040534_18_-1 |
| Platr10       | -3.349 | -4.981 | -4.981 | -4.981 | -4.975 | -4.870 | -4.960 | -4.653 | -4.981 | -4.981 | 69193     | NA    | NR_040539_3_-1  |
| 4930406D18Rik | -4.981 | -4.981 | -3.700 | -4.094 | -3.813 | -4.537 | -4.550 | -4.946 | -4.981 | -4.981 | 73806     | NA    | NR_040543_3_+1  |
| 1700125G22Rik | -4.981 | -2.437 | -4.316 | -4.948 | -4.931 | -4.363 | -4.965 | -4.953 | -4.190 | -4.227 | 76657     | NA    | NR_040548_3_+1  |
| 9830132P13Rik | -4.981 | -4.981 | -4.838 | -4.243 | -4.928 | -3.804 | -4.650 | -2.870 | -3.738 | -4.079 | 329753    | NA    | NR_040552_3_+1  |
| 4933439K11Rik | -1.455 | -2.160 | 1.262  | 1.192  | 0.176  | 0.315  | -0.420 | 0.588  | -0.509 | -0.822 | 71319     | NA    | NR_040558_1_-1  |
| Gm12522       | 1.278  | -0.510 | 1.008  | -0.001 | 1.808  | 1.543  | 1.665  | 0.900  | -0.397 | -0.359 | 100038453 | NA    | NR_040560_3_-1  |
| 2810442N19Rik | -4.981 | -3.408 | -3.594 | -4.818 | -4.497 | -4.756 | -4.536 | -2.936 | -3.925 | -2.249 | 72753     | NA    | NR_040562_1_+1  |
| Gm10560       | -4.981 | -4.981 | -3.594 | -3.002 | -3.543 | -3.674 | -3.276 | -4.134 | -4.981 | -4.981 | 100038526 | NA    | NR_040563_4_-1  |
| 4930547E14Rik | -4.981 | -4.981 | -2.617 | -2.967 | -4.262 | -4.295 | -4.873 | -4.972 | -4.981 | -4.981 | 75145     | NA    | NR_040564_16_+1 |
| 4930478L05Rik | 0.421  | 0.241  | -0.569 | -0.356 | -1.864 | -0.585 | -0.601 | -0.799 | -0.247 | 0.625  | 75818     | NA    | NR_040569_16_+1 |
| 1700123M08Rik | 1.047  | 1.165  | -0.255 | -2.117 | -0.742 | -1.189 | -1.301 | -1.878 | -0.793 | -1.767 | 100503636 | NA    | NR_040577_4_+1  |
| 1700094J05Rik | -4.981 | -4.981 | -4.981 | -4.981 | -4.972 | -4.835 | -4.981 | -4.981 | -4.981 | -4.981 | 67523     | NA    | NR_040580_10_+1 |
| Tspan2os      | -1.075 | -0.994 | -4.476 | -3.578 | -1.697 | -1.401 | -1.741 | -4.346 | -4.981 | -3.882 | 78491     | NA    | NR_040588_3_-1  |
| 1700030L20Rik | -4.981 | -4.981 | -2.630 | -4.290 | -3.223 | -4.415 | -3.307 | -4.507 | -3.525 | -4.981 | 70055     | NA    | NR_040592_3_-1  |
| 4930487H11Rik | -4.981 | -4.981 | -4.976 | -4.882 | -4.966 | -4.966 | -4.605 | -5.013 | -4.981 | -4.227 | 74992     | NA    | NR_040601_1_-1  |
| 4931402G19Rik | -2.977 | -3.315 | -2.659 | -1.074 | -2.163 | -3.645 | -2.465 | -3.141 | -1.820 | -2.025 | 70933     | NA    | NR_040608_2_-1  |
| 2010009K17Rik | -4.981 | -3.267 | -4.098 | -3.805 | -4.811 | -4.927 | -4.848 | -4.532 | -4.981 | -3.303 | 72340     | NA    | NR_040609_2_-1  |
| Accs2os       | -4.981 | -4.981 | -4.442 | -4.674 | -4.895 | -4.944 | -4.956 | -4.871 | -3.142 | -3.429 | 74945     | NA    | NR_040613_2_-1  |
| A130077B15Rik | 1.286  | 1.206  | 1.667  | 1.736  | 1.970  | 1.785  | 1.408  | 1.261  | 1.144  | 1.731  | 319272    | NA    | NR_040616_10_-1 |
| A930019D19Rik | -4.981 | -2.895 | -4.268 | -4.269 | -3.981 | -4.134 | -4.800 | -3.524 | -1.875 | -4.227 | 77806     | NA    | NR_040619_2_+1  |
| 4930573O16Rik | -2.573 | -2.883 | -4.776 | -4.976 | -4.981 | -4.981 | -4.981 | -4.981 | -4.981 | -4.981 | 78049     | NA    | NR_040620_2_+1  |
| D930015M05Rik | -3.090 | -4.981 | -2.834 | -2.898 | -2.808 | -3.250 | -2.578 | -4.099 | -3.277 | -3.540 | 320507    | NA    | NR_040621_2_-1  |
| Arhgap15os    | -3.422 | -4.981 | -3.423 | -3.398 | -4.059 | -3.886 | -2.770 | -4.955 | -3.244 | -3.748 | 320872    | NA    | NR_040622_2_-1  |
| 9230105E05Rik | -4.981 | -4.981 | -4.349 | -4.168 | -4.907 | -4.968 | -4.955 | -4.937 | -4.981 | -4.981 | 320626    | NA    | NR_040626_10_+1 |
| Gm17066       | 4.466  | 4.298  | 4.090  | 3.722  | 3.837  | 3.905  | 3.814  | 3.432  | 3.033  | 3.555  | 100502987 | NA    | NR_040628_14_-1 |
| Gm20753       | -4.010 | -3.315 | -3.272 | -4.244 | -3.487 | -4.449 | -4.479 | -4.626 | -4.981 | -4.981 | 626049    | NA    | NR_040630_1_-1  |
| 0610043K17Rik | -1.176 | -4.981 | -1.922 | -2.772 | -4.013 | -4.746 | -3.864 | -4.274 | -4.190 | -4.981 | 68400     | NA    | NR_040640_4_+1  |
| Ctrcos        | -4.981 | -3.408 | -3.047 | -4.478 | -3.788 | -4.640 | -4.539 | -4.722 | -4.241 | -4.981 | 69139     | NA    | NR_040641_4_+1  |
| Mipep         | -0.760 | 0.422  | -0.930 | 0.493  | -0.493 | -0.243 | -0.811 | -0.423 | 0.543  | -0.527 | 70478     | MIPEP | NR_040642_14_+1 |
| 2210414B05Rik | -2.483 | -4.981 | -4.978 | -4.978 | 0.229  | -0.785 | -2.567 | -1.562 | -3.750 | -2.452 | 70143     | NA    | NR_040643_4_+1  |
| 8430436N08Rik | -3.189 | -0.672 | -4.981 | -4.981 | -4.981 | -4.981 | -4.981 | -4.981 | -4.981 | -4.981 | 71510     | NA    | NR_040645_4_+1  |
| A330049N07Rik | -2.336 | -3.408 | -4.102 | -4.521 | -4.970 | -4.721 | -4.938 | -4.959 | -4.981 | -3.430 | 327768    | NA    | NR_040646_10_-1 |
| 1700003M07Rik | -4.981 | -4.749 | -4.944 | -4.977 | -4.974 | -4.974 | -4.980 | -4.979 | -1.993 | -4.937 | 72225     | NA    | NR_040647_4_+1  |
| 1700003M07Rik | -4.981 | -3.267 | -3.860 | -4.986 | -4.867 | -4.898 | -4.692 | -4.856 | -1.763 | -3.181 | 72225     | NA    | NR_040648_4_+1  |
| Alg11         | 2.733  | 3.217  | 2.420  | 1.995  | 2.001  | 2.055  | 2.367  | 2.667  | 2.093  | 2.721  | 207958    | ALG11 | NR_040650_8_+1  |
| Platr7        | -4.981 | -1.541 | -4.258 | -4.950 | -4.128 | -4.894 | -3.837 | -4.545 | -1.539 | -2.436 | 442847    | NA    | NR_040658_10_-1 |
| Gm5860        | -0.307 | -2.140 | -1.693 | -3.349 | -1.276 | -2.860 | -1.682 | -2.821 | -2.469 | -2.560 | 545641    | NA    | NR_040659_4_+1  |
| LOC100504703  | 2.652  | 2.425  | 0.484  | 0.435  | 1.336  | 1.193  | 1.622  | 0.809  | 0.649  | -0.277 | 100504703 | NA    | NR_040660_10_+1 |
| Fhad1os1      | -4.981 | -4.981 | -4.180 | -4.719 | -4.275 | -4.943 | -4.981 | -4.981 | -4.981 | -4.981 | 545691    | NA    | NR_040672_4_+1  |
| Gm12505       | 0.417  | -0.176 | 1.290  | 0.090  | 0.505  | 0.627  | -1.172 | -0.255 | -2.103 | -1.440 | 100415914 | NA    | NR_040674_4_-1  |
| 2310034O05Rik | -4.981 | -4.981 | -4.888 | -3.534 | -2.632 | -3.740 | -3.937 | -4.701 | -4.394 | -4.981 | 69571     | NA    | NR_040679_5_+1  |
| LOC100503496  | -0.222 | -0.775 | 0.680  | -0.692 | 0.539  | 0.023  | 0.294  | -0.015 | 0.070  | -0.350 | 100503496 | NA    | NR_040680_11_+1 |
| Prkag2os1     | -1.278 | -0.436 | -2.203 | -3.075 | -1.800 | -3.674 | -1.702 | -2.486 | -0.993 | -1.370 | 71161     | NA    | NR_040684_5_+1  |
| 4933438B17Rik | -4.981 | -4.981 | -4.981 | -4.981 | -4.921 | -0.760 | -4.976 | -4.904 | -4.981 | -4.981 | 71247     | NA    | NR_040685_5_+1  |
| AW046200      | -1.262 | -4.981 | -0.161 | -1.772 | -4.007 | -4.164 | -3.389 | -4.164 | -2.126 | -4.342 | 100502619 | NA    | NR_040698_8_+1  |
| 1110046J04Rik | -3.189 | -4.981 | -2.972 | -4.916 | -3.485 | -4.822 | -3.710 | -3.440 | -4.190 | -3.386 | 68808     | NA    | NR_040707_13_+1 |
| E130102H24Rik | 2.753  | 2.453  | 3.408  | 2.896  | 2.031  | 2.110  | 2.319  | 1.626  | 1.273  | 0.723  | 77866     | NA    | NR_040708_4_-1  |
| Plet1os       | -4.981 | -1.991 | -4.059 | -2.508 | -3.710 | -3.273 | -2.752 | -2.986 | -4.190 | -4.981 | 69631     | NA    | NR_040714_9_-1  |
| C130083M11Rik | -4.981 | -4.981 | -4.954 | -3.565 | -4.671 | -4.383 | -4.547 | -4.760 | -4.981 | -4.342 | 414111    | NA    | NR_040717_5_-1  |
| 4933433G15Rik | -0.334 | 0.623  | -1.053 | -0.280 | 1.512  | 2.010  | 0.838  | -1.426 | -0.442 | -1.317 | 71274     | NA    | NR_040719_9_+1  |
| Snhg5         | 4.422  | 4.041  | 4.561  | 4.342  | 4.086  | 4.159  | 4.008  | 4.281  | 2.756  | 2.768  | 72655     | NA    | NR_040721_9_-1  |
| 1700110K17Rik | -4.981 | -4.981 | -4.735 | -4.406 | -4.885 | -4.801 | -4.977 | -4.971 | -4.981 | -4.981 | 73558     | NA    | NR_040728_9_+1  |
| 4833428L15Rik | -4.981 | -4.981 | -5.017 | -3.854 | -4.619 | -4.034 | -4.974 | -4.978 | -4.981 | -3.758 | 74602     | NA    | NR_040732_9_-1  |
| 4930429F24Rik | -2.501 | -2.533 | -2.924 | -3.194 | -3.592 | -3.317 | -2.963 | -4.520 | -4.981 | -2.733 | 74633     | NA    | NR_040734_9_+1  |
| 4930524O08Rik | -4.981 | -4.981 | -4.962 | -4.592 | -3.478 | -3.813 | -4.974 | -4.978 | -4.981 | -4.981 | 74700     | NA    | NR_040735_9_+1  |
| 4930525D18Rik | -4.981 | -4.981 | -3.721 | -4.966 | -4.970 | -4.794 | -3.247 | -4.878 | -3.925 | -4.227 | 75100     | NA    | NR_040738_9_-1  |
| Scarletttr    | -4.981 | -4.981 | -4.981 | -4.981 | -4.981 | -4.981 | -4.970 | -4.734 | -4.190 | -4.981 | 76814     | NA    | NR_040743_9_+1  |
| Gm15133       | 2.084  | -4.981 | 2.344  | -4.620 | 2.154  | -4.699 | 1.897  | -4.672 | 0.662  | -4.227 | 622070    | NA    | NR_040749_7_+1  |
| Gm20752       | -4.981 | -4.981 | -4.972 | -4.972 | -4.966 | -4.966 | -4.935 | -4.843 | -4.981 | -2.721 | 624759    | NA    | NR_040750_3_+1  |
| AU023762      | -4.981 | -3.408 | -3.635 | -3.874 | -3.916 | -4.670 | -3.978 | -3.980 | -4.190 | -4.981 | 102688    | NA    | NR_040760_9_-1  |
| 4930511E03Rik | -4.981 | -4.981 | -4.978 | -4.508 | -4.677 | -4.937 | -4.100 | -4.957 | -4.981 | -4.981 | 78773     | NA    | NR_040761_6_+1  |
| 9430037G07Rik | -3.189 | -3.207 | -0.906 | -0.522 | -1.793 | 0.482  | -1.936 | -0.348 | -0.906 | -1.082 | 320692    | NA    | NR_040766_9_-1  |

|               |        |        |        |        |        |        |        |        |        |        |           |          |                      |
|---------------|--------|--------|--------|--------|--------|--------|--------|--------|--------|--------|-----------|----------|----------------------|
| Gm5122        | -4.981 | -4.981 | -4.971 | -4.782 | -4.756 | -4.440 | -4.981 | -4.981 | -4.981 | -4.227 | 330956    | NA       | NR_040767_9_+1       |
| Gm20756       | -2.388 | -2.336 | -4.940 | -3.212 | -3.016 | -2.642 | -3.834 | -4.512 | -4.981 | -3.142 | 626904    | NA       | NR_040771_6_+1       |
| 2210039801Rik | 2.011  | 0.687  | 1.801  | 1.166  | 1.865  | 0.391  | 1.844  | 0.914  | 1.206  | -0.931 | 73644     | NA       | NR_044985_12_+1      |
| Gm6936        | -4.981 | -4.981 | -4.399 | -4.996 | -4.894 | -3.956 | -4.933 | -4.389 | -4.981 | -4.981 | 628951    | NA       | NR_045001_16_+1      |
| Gm20257       | 5.028  | 4.845  | 2.669  | 1.961  | 2.308  | 2.076  | 2.915  | 3.295  | 2.762  | 2.905  | 100504501 | NA       | NR_045007_1_+1       |
| Gm20300       | 2.797  | 2.554  | 3.552  | 3.089  | 2.558  | 1.887  | 2.692  | 2.053  | 2.384  | 2.440  | 100504586 | NA       | NR_045008_10_-1      |
| Gm15987       | 3.205  | 1.551  | 3.081  | 3.210  | 4.883  | 4.851  | 5.457  | 5.225  | 5.160  | 5.256  | 100504591 | NA       | NR_045009_6_-1       |
| Sfpq          | 4.325  | 4.700  | 4.731  | 4.456  | 5.248  | 5.181  | 4.748  | 4.195  | 3.929  | 3.284  | 71514     | SFPQ     | NR_045010_4_+1       |
| Gdap10        | 3.170  | 3.342  | 5.196  | 4.836  | 5.342  | 4.202  | 4.321  | 3.566  | 3.876  | 3.659  | 100504486 | NA       | NR_045032_12_+1      |
| Khdrbs1       | 1.977  | 1.646  | 4.093  | 4.029  | 4.162  | 3.996  | 3.710  | 3.239  | 3.520  | 3.170  | 20218     | KHDRBS1  | NR_045036_4_-1       |
| Zfp207        | 3.032  | 2.910  | 2.883  | 2.689  | 3.453  | 3.147  | 3.064  | 3.149  | 3.041  | 3.338  | 22680     | ZNF207   | NR_045038_11_+1      |
| 2700038G22Rik | 0.493  | 0.282  | 0.187  | -1.025 | -1.173 | -0.744 | -3.173 | -3.229 | -3.256 | -3.335 | 67194     | NA       | NR_045040_5_+1       |
| 2700038G22Rik | 1.011  | 2.007  | 1.048  | 2.396  | 0.740  | 1.342  | 0.127  | 1.396  | -0.240 | 0.480  | 67194     | NA       | NR_045042_5_+1       |
| 9130015A21Rik | -4.981 | -2.510 | -3.060 | -3.310 | -2.679 | -3.044 | -4.053 | -4.061 | -4.981 | -3.498 | 71581     | NA       | NR_045050_12_-1      |
| 9130015A21Rik | -2.842 | -1.258 | 1.812  | 0.581  | -1.338 | -1.673 | -2.909 | -3.705 | -4.981 | -4.981 | 71581     | NA       | NR_045051_12_-1      |
| Gm20187       | -4.981 | -4.981 | -4.446 | -4.987 | -4.470 | -4.303 | -4.838 | -4.967 | -4.190 | -4.092 | 100504347 | NA       | NR_045052_12_-1      |
| 2610307P16Rik | -0.014 | -0.097 | -3.832 | -4.176 | -4.481 | -4.743 | -3.319 | -3.649 | -4.981 | -4.981 | 72518     | NA       | NR_045053_13_-1      |
| 2610307P16Rik | -2.391 | -0.525 | -4.936 | -3.877 | -4.921 | -4.463 | -4.912 | -4.030 | -4.981 | -4.981 | 72518     | NA       | NR_045054_13_-1      |
| 3110056K07Rik | -1.793 | -1.684 | -2.790 | -2.672 | -3.613 | -4.619 | -3.343 | -4.268 | -4.981 | -3.702 | 73204     | NA       | NR_045055_12_-1      |
| 3110056K07Rik | 3.857  | 3.790  | 3.464  | 3.485  | 2.927  | 2.885  | 3.029  | 3.253  | 2.177  | 2.868  | 73204     | NA       | NR_045056_12_-1      |
| Gm20337       | 0.797  | -0.933 | -0.581 | 0.612  | 0.288  | 0.314  | -0.277 | 0.112  | 0.010  | -0.043 | 100504661 | NA       | NR_045057_12_-1      |
| 4930431P03Rik | -4.981 | -4.981 | -2.621 | -4.531 | -4.696 | -2.336 | -4.799 | -2.958 | -1.927 | -2.743 | 73895     | NA       | NR_045059_14_-1      |
| Gm20324       | 2.338  | 1.223  | 3.943  | 3.577  | 4.023  | 3.748  | 3.548  | 3.258  | 1.874  | 1.507  | 100504637 | NA       | NR_045068_15_+1      |
| Gm16576       | 0.310  | 0.062  | 1.223  | 1.212  | 1.847  | 0.952  | 1.264  | 1.494  | 1.878  | 1.673  | 100504191 | NA       | NR_045069_15_+1      |
| 4930592A05Rik | -4.981 | -2.510 | -3.049 | -3.108 | -4.980 | -4.957 | -3.911 | -4.487 | -3.576 | -4.145 | 75880     | NA       | NR_045070_15_-1      |
| Gm19510       | -3.563 | -0.773 | -1.124 | -1.519 | -4.832 | -3.992 | -4.432 | -4.769 | -1.250 | -4.981 | 100503021 | NA       | NR_045076_15_-1      |
| Gm3716        | -4.981 | -4.981 | -4.945 | -0.453 | -4.972 | -3.310 | -4.968 | -2.228 | -4.981 | -4.316 | 100042198 | NA       | NR_045078_5_-1       |
| 330005D01Rik  | 2.961  | 3.656  | -1.833 | 0.076  | 0.169  | 2.847  | -2.037 | 0.827  | -2.862 | -1.920 | 78512     | NA       | NR_045079_17_+1      |
| 330005D01Rik  | 0.808  | 0.962  | -1.795 | -1.543 | -0.472 | -2.018 | -1.615 | -1.843 | -3.693 | -2.095 | 78512     | NA       | NR_045080_17_+1      |
| 330005D01Rik  | 3.913  | -0.344 | 1.069  | -0.257 | 2.008  | 0.657  | 0.875  | -0.798 | 0.128  | -1.558 | 78512     | NA       | NR_045081_17_+1      |
| Gm2721        | -4.981 | -1.499 | -4.981 | -4.981 | -3.996 | -3.376 | -4.981 | -4.981 | -4.981 | -4.981 | 100040339 | NA       | NR_045085_12_-1      |
| AW495222      | -4.981 | -4.981 | -4.981 | -4.981 | -2.511 | -2.645 | -3.673 | -4.367 | -4.981 | -4.981 | 105364    | NA       | NR_045086_13_-1      |
| Gm16677       | -4.981 | -4.981 | -4.965 | -4.965 | -4.901 | -3.895 | -4.981 | -4.981 | -4.981 | -4.981 | 100504477 | NA       | NR_045091_14_-1      |
| Gm16677       | -4.981 | -4.981 | -4.965 | -4.965 | -4.901 | -3.895 | -4.981 | -4.981 | -4.981 | -4.981 | 100504477 | NA       | NR_045091_dup1_14_-2 |
| Gm9920        | -3.668 | -4.981 | -0.756 | -0.657 | -1.797 | -1.782 | -0.338 | -1.680 | -0.470 | -0.396 | 100503794 | NA       | NR_045093_15_-1      |
| Gm12159       | -0.393 | -0.194 | -0.422 | -0.691 | 2.342  | 2.597  | 0.348  | 0.120  | -3.750 | -1.721 | 100504255 | NA       | NR_045100_11_-1      |
| Patz1         | -4.981 | -4.981 | -3.382 | -2.587 | -3.740 | -4.313 | -4.723 | -4.867 | -0.214 | -2.249 | 56218     | PATZ1    | NR_045108_11_+1      |
| Patz1         | -4.981 | -4.981 | 0.101  | -1.680 | -2.688 | -3.644 | -1.148 | -1.908 | -2.124 | -3.418 | 56218     | PATZ1    | NR_045109_11_+1      |
| Gm2027        | -4.981 | -2.459 | -2.401 | -2.358 | -3.591 | -3.627 | -3.254 | -4.961 | -3.471 | -3.816 | 100039062 | NA       | NR_045113_12_+1      |
| 1110028F11Rik | -4.981 | -4.981 | -3.841 | -3.038 | -1.225 | -2.924 | -0.220 | -1.952 | -4.981 | -2.342 | 68690     | NA       | NR_045139_11_+1      |
| BC051226      | -0.164 | -0.558 | -0.245 | -1.148 | -1.415 | -2.439 | -0.038 | -0.523 | 1.260  | 0.742  | 407803    | NA       | NR_045146_17_-1      |
| Slain1os      | -1.536 | -2.782 | -3.106 | -2.797 | -2.325 | -1.899 | -3.917 | -3.061 | -4.981 | -4.981 | 70898     | NA       | NR_045148_14_-1      |
| E13008D07Rik  | -4.981 | -4.981 | -4.981 | -4.981 | -4.971 | -4.971 | -4.981 | -4.981 | -4.981 | -3.758 | 545207    | NA       | NR_045153_17_-1      |
| E13008D07Rik  | -3.563 | -4.981 | -4.958 | -4.435 | -4.878 | -4.970 | -4.966 | -3.040 | -4.981 | -2.063 | 545207    | NA       | NR_045154_17_-1      |
| Gm7008        | -2.494 | -4.981 | -4.642 | -4.520 | -3.887 | -4.796 | -4.306 | -4.832 | -3.022 | -4.981 | 629820    | NA       | NR_045157_12_+1      |
| A83009L08Rik  | -3.668 | -2.340 | -2.458 | -3.593 | -3.023 | -4.099 | -2.295 | -3.649 | -2.809 | -2.516 | 320297    | NA       | NR_045161_13_-1      |
| 4933431G14Rik | -4.981 | -4.981 | -2.779 | -4.799 | -4.511 | -4.130 | -4.306 | -4.963 | -3.189 | -4.981 | 71265     | NA       | NR_045163_6_-1       |
| Slc2a4rg-ps   | 0.431  | 1.781  | 1.064  | 1.460  | 1.571  | 1.927  | 1.451  | 1.646  | 0.441  | 0.891  | 329584    | NA       | NR_045164_2_+1       |
| 4933431G14Rik | -4.981 | -4.981 | -1.580 | -2.075 | -1.581 | -3.365 | -2.864 | -3.357 | -4.981 | -4.981 | 71265     | NA       | NR_045165_6_-1       |
| B4galnt1      | 1.527  | 0.408  | 1.929  | 3.297  | 3.582  | 4.879  | 2.767  | 3.389  | 2.531  | 3.826  | 14421     | B4GALNT1 | NR_045166_10_+1      |
| 2010310C07Rik | -3.090 | -4.981 | -4.299 | -4.977 | -4.967 | -4.967 | -4.655 | -4.970 | -2.946 | -4.227 | 72131     | NA       | NR_045169_6_+1       |
| Gm10336       | 2.273  | 1.343  | 0.794  | 0.211  | 1.907  | 2.198  | 2.080  | 1.511  | 0.982  | 1.661  | 328186    | NA       | NR_045170_13_-1      |
| 1700012D01Rik | -3.349 | -4.981 | -0.677 | -1.759 | -0.772 | -0.365 | 0.088  | -0.317 | -0.727 | -0.405 | 72243     | NA       | NR_045171_10_+1      |
| Smc2os        | -0.956 | -0.342 | -3.324 | -2.399 | -3.522 | -3.343 | -1.538 | -3.962 | -3.109 | -2.539 | 72648     | NA       | NR_045175_4_-1       |
| 2810468N07Rik | 2.939  | 3.523  | -0.279 | -0.453 | -0.629 | -0.831 | 0.384  | 1.375  | 0.346  | 1.724  | 72834     | NA       | NR_045176_17_+1      |
| 4932702P03Rik | -4.981 | -4.981 | -4.980 | -4.980 | -4.947 | -4.933 | -4.976 | -4.979 | -4.486 | -4.981 | 73326     | NA       | NR_045182_13_+1      |
| 4931431B13Rik | -2.826 | -1.106 | -4.327 | -4.952 | -4.839 | -4.886 | -4.981 | -4.981 | -4.981 | -4.981 | 70973     | NA       | NR_045183_7_-1       |
| 4833417C18Rik | 2.456  | 1.318  | 1.484  | 0.823  | 2.151  | 1.579  | 2.534  | 1.554  | 1.274  | 0.976  | 73906     | NA       | NR_045187_11_+1      |
| St18          | -4.288 | -4.981 | -4.899 | -4.783 | -4.724 | -4.857 | -3.365 | -4.873 | -4.981 | -4.981 | 240690    | ST18     | NR_045188_1_+1       |
| St18          | -3.854 | -4.981 | -4.807 | -4.577 | -4.305 | -4.654 | -3.608 | -4.863 | -4.981 | -4.981 | 240690    | ST18     | NR_045189_1_+1       |
| 4930525G20Rik | -4.981 | -4.981 | -4.981 | -4.981 | -4.523 | -4.723 | -4.910 | -4.867 | -4.981 | -4.981 | 320163    | NA       | NR_045194_13_-1      |
| A830082K12Rik | -4.981 | -4.981 | -4.981 | -4.981 | -4.981 | -4.981 | -4.954 | -4.703 | -4.981 | -4.981 | 320174    | NA       | NR_045195_13_+1      |
| Mira          | 3.725  | 3.192  | 0.101  | -0.822 | 1.680  | 1.603  | 0.989  | -1.075 | -4.394 | -4.981 | 100736249 | NA       | NR_045199_6_-1       |
| AI847159      | -1.433 | -4.981 | -2.456 | -2.301 | -2.597 | -3.060 | -4.650 | -3.162 | -4.981 | -4.981 | 100048701 | NA       | NR_045264_2_-1       |
| Toporsos      | 5.004  | 4.918  | 4.000  | 3.990  | 4.194  | 4.104  | 4.796  | 4.317  | 3.315  | 3.360  | 100504309 | NA       | NR_045265_4_+1       |
| Gm15545       | 0.374  | -0.386 | -0.118 | -0.451 | 0.166  | -0.384 | -0.095 | -0.078 | 0.014  | -0.022 | 100502630 | NA       | NR_045266_7_+1       |
| 2810013P06Rik | 6.287  | 6.432  | 5.058  | 4.860  | 4.843  | 5.195  | 5.106  | 5.158  | 4.679  | 4.744  | 100503178 | NA       | NR_045268_8_+1       |
| Sp3os         | 3.779  | 3.511  | 2.240  | 2.087  | 2.017  | 2.169  | 3.003  | 2.524  | 3.608  | 2.721  | 100503849 | NA       | NR_045269_2_+1       |
| 1700101111Rik | 0.511  | 0.194  | -1.838 | -1.577 | -1.004 | -1.790 | -1.200 | -2.942 | -2.192 | -2.371 | 100504641 | NA       | NR_045270_6_-1       |
| Med9os        | -3.028 | -4.981 | -3.314 | -4.945 | -4.443 | -4.983 | -3.678 | -4.934 | -4.981 | -4.981 | 100504121 | NA       | NR_045273_11_-1      |
| 5430437J10Rik | -1.137 | -1.893 | 2.654  | 2.452  | 2.860  | 3.915  | 3.417  | 3.404  | 2.287  | 2.646  | 71432     | NA       | NR_045274_15_+1      |
| 8430429K09Rik | 2.527  | 2.389  | -0.238 | 0.184  | 0.144  | 0.713  | 0.684  | 0.038  | 0.373  | -0.691 | 71523     | NA       | NR_045275_11_+1      |
| 8430429K09Rik | 0.362  | 0.296  | 0.559  | 0.315  | -0.855 | -0.161 | -1.808 | 0.675  | -1.260 | 0.520  | 71523     | NA       | NR_045276_11_+1      |
| Gm10433       | -3.090 | -4.981 | -2.051 | -1.706 | -2.097 | -1.795 | -3.340 | -3.301 | -4.981 | -3.205 | 100038378 | NA       | NR_045282_12_+1      |

|               |        |        |        |        |        |        |        |        |        |        |           |       |                 |
|---------------|--------|--------|--------|--------|--------|--------|--------|--------|--------|--------|-----------|-------|-----------------|
| Gm15941       | -4.981 | -4.981 | -4.981 | -4.981 | -4.239 | -4.915 | -4.963 | -4.802 | -4.981 | -4.981 | 100503538 | NA    | NR_045283_15_-1 |
| 1700097N02Rik | 2.800  | 2.862  | -1.376 | -1.570 | 0.454  | -0.368 | -0.565 | -0.599 | -1.259 | -1.531 | 67522     | NA    | NR_045287_17_-1 |
| 1700064M15Rik | -1.188 | -2.133 | -1.084 | -2.824 | -0.771 | -3.714 | -1.419 | -3.321 | -1.841 | -3.165 | 73457     | NA    | NR_045288_12_-1 |
| Rab26os       | 0.771  | 0.349  | 0.416  | 0.378  | -0.225 | 0.100  | 0.160  | -0.284 | -0.529 | -0.978 | 75614     | NA    | NR_045289_17_+1 |
| 4732491K20Rik | 2.167  | 1.447  | -0.515 | -0.360 | -3.286 | -3.766 | -2.390 | -1.730 | -0.985 | -0.974 | 224523    | NA    | NR_045290_17_+1 |
| Gm4285        | 1.287  | 1.752  | 1.380  | 1.393  | 0.301  | 0.712  | 0.789  | 1.002  | 1.467  | 1.154  | 100043189 | NA    | NR_045294_14_-1 |
| 2810029C07Rik | 1.300  | -0.285 | 1.131  | 0.150  | 1.223  | 0.231  | -0.424 | -2.006 | -0.489 | -3.882 | 100504687 | NA    | NR_045295_12_-1 |
| Gm17644       | 2.240  | 2.044  | 3.072  | 2.515  | 3.401  | 2.696  | 2.455  | 1.570  | 1.645  | 1.257  | 329096    | NA    | NR_045297_1_+1  |
| 2900009J06Rik | -4.981 | -4.981 | -4.985 | -4.420 | -3.515 | -4.668 | -4.177 | -4.269 | -4.981 | -4.981 | 100502745 | NA    | NR_045298_1_-1  |
| 2900076A07Rik | 1.943  | 2.101  | 1.312  | 0.730  | 1.310  | 0.981  | 1.047  | 1.209  | 1.154  | 0.572  | 100504421 | NA    | NR_045299_7_+1  |
| 1700048M11Rik | -4.981 | -4.981 | -4.645 | -4.740 | -4.511 | -4.875 | -4.486 | -4.726 | -2.485 | -4.227 | 100503166 | NA    | NR_045300_16_-1 |
| 1700102H20Rik | -4.981 | -4.981 | -4.945 | -4.084 | -4.962 | -4.549 | -4.346 | -3.869 | -4.981 | -4.981 | 68230     | NA    | NR_045302_17_+1 |
| 1700102H20Rik | -1.260 | -1.148 | -1.794 | -2.036 | -2.133 | -2.100 | -3.384 | -2.832 | -3.823 | -3.853 | 68230     | NA    | NR_045303_17_+1 |
| AU040972      | -3.349 | -2.087 | -3.377 | -3.404 | -4.663 | -4.430 | -3.639 | -4.313 | -1.810 | -3.480 | 104522    | NA    | NR_045305_11_-1 |
| 4931403E22Rik | -3.843 | -4.981 | -4.416 | -4.343 | -3.712 | -3.380 | -4.612 | -4.308 | -2.809 | -4.227 | 70942     | NA    | NR_045306_19_-1 |
| A430088P11Rik | -3.602 | -2.761 | -4.768 | -4.536 | -4.943 | -4.529 | -4.889 | -2.164 | -4.981 | -2.212 | 106059    | NA    | NR_045309_15_-1 |
| A430088P11Rik | -0.908 | -0.315 | -4.504 | -3.601 | -4.960 | -3.731 | -4.204 | -3.180 | -2.958 | -1.583 | 106059    | NA    | NR_045310_15_-1 |
| Rptoros       | -4.566 | -4.331 | -3.700 | -4.290 | -3.399 | -3.603 | -4.880 | -4.944 | -4.709 | -4.902 | 319454    | NA    | NR_045312_11_-1 |
| Rptoros       | -0.584 | -0.824 | -1.637 | -3.285 | -1.132 | -2.514 | -0.434 | -2.371 | -2.196 | -1.774 | 319454    | NA    | NR_045313_11_-1 |
| 9830166K06Rik | -4.981 | -4.981 | -4.981 | -4.981 | -4.981 | -4.981 | -4.941 | -4.914 | -0.723 | -4.981 | 402757    | NA    | NR_045314_19_-1 |
| 4930552P12Rik | -0.242 | -2.087 | -1.382 | -2.935 | -0.979 | -1.405 | -2.004 | -3.704 | -1.642 | -2.215 | 77594     | NA    | NR_045318_19_-1 |
| Gm19557       | -2.106 | -1.668 | 2.482  | 0.474  | -1.049 | -2.252 | -1.452 | -0.908 | 1.145  | 0.739  | 100503104 | NA    | NR_045322_19_+1 |
| Gm14827       | -3.843 | -4.981 | -4.811 | -4.330 | -4.506 | -4.792 | -4.854 | -3.914 | -4.981 | -4.981 | 100503393 | NA    | NR_045323_X_+1  |
| Gm19705       | 4.263  | 4.348  | -4.569 | -3.675 | -4.395 | -3.432 | -2.626 | -1.324 | -2.678 | -3.309 | 100503460 | NA    | NR_045324_1_+1  |
| Gm19705       | -0.779 | -4.981 | -4.420 | -4.548 | -3.326 | -4.462 | -3.110 | -4.311 | -2.446 | -4.026 | 100503460 | NA    | NR_045325_1_+1  |
| A330009N23Rik | -3.215 | -4.981 | -0.949 | -1.905 | -0.323 | 0.176  | -2.029 | -2.151 | -4.625 | -2.452 | 380977    | NA    | NR_045326_15_-1 |
| A330009N23Rik | -3.303 | -0.619 | -1.941 | -2.148 | -0.145 | -0.485 | -2.032 | -2.675 | -1.869 | -4.981 | 380977    | NA    | NR_045327_15_-1 |
| A330009N23Rik | -0.974 | 0.413  | -0.825 | -0.544 | 1.177  | 1.158  | -0.204 | -1.199 | -4.443 | -2.553 | 380977    | NA    | NR_045328_15_-1 |
| A330032B11Rik | -2.762 | -1.273 | -1.013 | -1.815 | -1.896 | -2.885 | -2.517 | -2.576 | -2.038 | -1.997 | 319931    | NA    | NR_045329_19_+1 |
| Mir1a-1hg     | -1.670 | -1.228 | -3.608 | -4.583 | -4.880 | -4.779 | -4.935 | -4.394 | -4.981 | -4.981 | 622283    | NA    | NR_045331_2_+1  |
| E330023G01Rik | -3.843 | -4.981 | -2.346 | -4.513 | -2.759 | -3.969 | -4.958 | -4.928 | -3.134 | -4.342 | 331011    | NA    | NR_045332_9_-1  |
| 2310039L15Rik | -2.652 | -1.941 | -2.368 | -1.151 | -2.244 | -2.948 | -2.092 | -3.153 | -1.817 | -3.714 | 69629     | NA    | NR_045337_10_+1 |
| 5730420D15Rik | -4.981 | -4.981 | -4.911 | -4.825 | -4.730 | -4.943 | -4.682 | -4.850 | -4.981 | -4.981 | 70523     | NA    | NR_045338_10_+1 |
| 5730420D15Rik | -4.981 | -4.981 | -4.749 | -4.374 | -4.202 | -4.803 | -4.047 | -4.202 | -4.981 | -4.981 | 70523     | NA    | NR_045339_10_+1 |
| 5730435O14Rik | 0.548  | 0.188  | -4.981 | -4.981 | -2.785 | -3.334 | -3.703 | -4.861 | -4.981 | -4.981 | 70538     | NA    | NR_045341_10_+1 |
| 4933411E08Rik | -4.981 | -4.981 | -3.200 | -4.064 | -4.847 | -4.989 | -2.485 | -4.830 | -4.981 | -4.981 | 71067     | NA    | NR_045342_10_+1 |
| Arhgap27os3   | 3.219  | 4.602  | 1.932  | 3.524  | 2.059  | 3.600  | 1.525  | 3.589  | 1.147  | 3.380  | 653030    | NA    | NR_045346_11_+1 |
| 4930455C13Rik | -1.638 | -3.202 | -2.359 | -2.591 | -2.877 | -3.840 | -2.512 | -4.254 | -1.686 | -3.364 | 73990     | NA    | NR_045352_10_-1 |
| 4930483K19Rik | -4.981 | -4.981 | -4.624 | -4.499 | -4.878 | -4.887 | -4.695 | -4.861 | -4.981 | -4.316 | 74953     | NA    | NR_045354_10_-1 |
| C130060C02Rik | -0.783 | -1.589 | -4.796 | -4.971 | -3.179 | -4.590 | -3.533 | -4.982 | -1.992 | -4.981 | 100502653 | NA    | NR_045355_19_+1 |
| 2210409D07Rik | -4.981 | -4.981 | -1.502 | -1.711 | -2.862 | -3.723 | -3.416 | -4.789 | -4.981 | -4.981 | 70157     | NA    | NR_045360_18_-1 |
| Gm6602        | -4.981 | -4.981 | -4.975 | -4.842 | -4.495 | -4.729 | -4.575 | -4.947 | -4.981 | -4.981 | 625585    | NA    | NR_045362_3_+1  |
| 1700024F13Rik | -4.981 | -4.981 | -2.722 | -3.418 | -0.968 | -2.114 | -3.176 | -4.968 | -4.981 | -4.342 | 73270     | NA    | NR_045363_13_+1 |
| A630012P03Rik | -4.981 | -4.981 | -4.696 | -4.915 | -4.759 | -4.902 | -2.148 | -3.428 | -2.239 | -2.367 | 100504594 | NA    | NR_045367_X_+1  |
| 4933424G05Rik | -4.981 | -4.981 | -3.649 | -4.403 | -2.374 | -3.804 | -4.969 | -4.953 | -4.981 | -4.981 | 74456     | NA    | NR_045372_18_+1 |
| 4930549G23Rik | -0.489 | -1.059 | -0.851 | -1.799 | -1.464 | -1.662 | -1.805 | -2.762 | -1.630 | -1.244 | 75286     | NA    | NR_045376_18_-1 |
| 4930563E18Rik | -1.665 | -4.981 | -4.929 | -4.335 | -4.911 | -4.430 | -4.521 | -3.938 | -4.981 | -4.981 | 75370     | NA    | NR_045379_18_+1 |
| 1700034I23Rik | -2.075 | -2.262 | -3.120 | -2.485 | -3.299 | -3.515 | -3.569 | -3.986 | -3.043 | -1.324 | 73297     | NA    | NR_045380_3_-1  |
| 5830416I19Rik | -2.075 | -4.981 | -4.981 | -4.981 | -4.981 | -4.981 | -4.981 | -4.981 | -1.685 | -4.342 | 74757     | NA    | NR_045384_5_+1  |
| 4930578E11Rik | -4.981 | -4.981 | -4.716 | -4.934 | -4.983 | -4.793 | -4.261 | -4.967 | -3.621 | -4.227 | 78058     | NA    | NR_045391_18_-1 |
| Gm10731       | -4.981 | -1.732 | -4.033 | -4.209 | -4.981 | -4.980 | -4.970 | -4.976 | -3.925 | -4.981 | 100039043 | NA    | NR_045392_3_-1  |
| 2010010A06Rik | -4.981 | -4.981 | -4.743 | -4.002 | -4.874 | -4.263 | -4.822 | -4.928 | -4.190 | -4.981 | 100503117 | NA    | NR_045394_18_-1 |
| A830052D11Rik | -3.843 | -2.533 | -1.954 | -3.389 | -1.778 | -3.472 | -0.907 | -2.839 | -3.373 | -3.461 | 402767    | NA    | NR_045403_18_-1 |
| 4930513D17Rik | 0.759  | 1.071  | -4.981 | -4.981 | -4.981 | -4.981 | -4.965 | -4.953 | -4.981 | -4.981 | 75095     | NA    | NR_045416_5_-1  |
| Bvht          | -3.189 | -3.315 | 2.147  | 0.471  | -3.943 | -4.419 | -1.810 | -1.363 | -4.981 | -2.161 | 545261    | NA    | NR_045420_18_+1 |
| 2410021H03Rik | -4.981 | -4.981 | -4.972 | -4.972 | -4.822 | -4.910 | -4.963 | -4.869 | -4.981 | -4.981 | 69750     | NA    | NR_045428_17_-1 |
| Bcor          | 3.321  | 2.986  | 0.506  | 0.006  | 1.755  | 1.803  | 1.713  | 1.146  | 0.199  | 0.662  | 71458     | BCOR  | NR_045434_X_-1  |
| 2700054A10Rik | -4.107 | -3.807 | -4.696 | -4.580 | -4.680 | -4.816 | -4.785 | -4.801 | -4.204 | -4.370 | 72578     | NA    | NR_045436_17_-1 |
| 2700054A10Rik | -2.228 | -1.618 | -3.212 | -1.060 | -1.597 | -0.554 | -2.536 | -1.035 | -1.585 | -0.291 | 72578     | NA    | NR_045437_17_-1 |
| Mospd4        | -4.981 | -4.981 | -0.279 | -1.498 | 0.817  | 0.567  | -0.342 | -1.448 | -2.519 | -2.124 | 72076     | NA    | NR_045438_18_-1 |
| 1700071M16Rik | -3.843 | -4.981 | -0.583 | -1.567 | 1.149  | 1.577  | 1.584  | 1.803  | 3.220  | 3.808  | 73504     | NA    | NR_045444_17_-1 |
| 1700071M16Rik | -4.981 | -4.981 | -4.981 | -4.981 | -4.981 | -4.981 | -3.193 | -4.428 | -4.981 | -4.981 | 73504     | NA    | NR_045445_17_-1 |
| Tbc1d22bos    | -4.981 | -4.981 | -2.690 | -4.445 | -3.642 | -4.899 | -2.995 | -4.419 | -4.190 | -3.361 | 74092     | NA    | NR_045447_17_-1 |
| B630019K06Rik | 1.382  | 2.645  | 2.597  | 3.382  | 3.653  | 4.248  | 2.894  | 2.368  | 0.753  | 0.850  | 102941    | NA    | NR_045448_X_+1  |
| Gm11413       | -4.981 | -4.981 | -2.205 | -4.510 | -0.851 | -1.684 | -0.522 | -2.154 | -4.981 | -4.981 | 790913    | NA    | NR_045450_4_-1  |
| 4933433H22Rik | -4.981 | -4.981 | -4.560 | -3.982 | -2.177 | -2.496 | -0.574 | -2.761 | -0.602 | -2.126 | 74473     | NA    | NR_045458_17_+1 |
| 1700110C19Rik | -2.948 | -2.583 | -4.478 | -4.223 | -4.763 | -4.094 | -4.232 | -3.900 | -3.491 | -3.480 | 76634     | NA    | NR_045461_17_+1 |
| 1810012K16Rik | -2.842 | -1.527 | -3.847 | -3.637 | -4.975 | -4.919 | -4.980 | -4.418 | -4.981 | -4.316 | 69108     | NA    | NR_045473_8_+1  |
| 1700007J10Rik | -4.981 | -4.981 | -3.116 | -4.555 | -3.547 | -4.162 | -3.043 | -4.039 | -3.242 | -3.351 | 69320     | NA    | NR_045476_11_-1 |
| 1810020O05Rik | -4.981 | -4.981 | 0.521  | -0.051 | -4.981 | -4.981 | -4.832 | -4.971 | -4.981 | -4.342 | 613264    | NA    | NR_045482_6_-1  |
| Tor2a         | 2.665  | 2.191  | 1.686  | 1.952  | 1.356  | 1.247  | 0.431  | 1.122  | 1.706  | 1.883  | 30933     | TOR2A | NR_045485_2_+1  |
| 1700029N11Rik | -4.981 | -4.981 | -2.836 | -3.829 | -1.266 | -2.715 | -3.588 | -4.968 | -4.981 | -3.853 | 69491     | NA    | NR_045489_13_+1 |
| 2410003L11Rik | -1.667 | -4.981 | -2.867 | -3.872 | -3.173 | -4.820 | -2.278 | -4.230 | -1.394 | -3.435 | 69729     | NA    | NR_045496_11_+1 |
| 2210416O15Rik | -4.981 | -4.981 | -3.109 | -3.723 | -4.819 | -4.685 | -4.969 | -4.901 | -4.981 | -4.981 | 70393     | NA    | NR_045499_11_+1 |

|               |        |        |        |        |        |        |        |        |        |        |           |         |                  |
|---------------|--------|--------|--------|--------|--------|--------|--------|--------|--------|--------|-----------|---------|------------------|
| 5730480H06Rik | 1.143  | 0.898  | -0.633 | -1.111 | -0.553 | -0.381 | -0.027 | -1.223 | -0.885 | -1.808 | 70592     | NA      | NR_045500_5_+_1  |
| 4921509007Rik | -4.981 | -4.981 | -4.978 | -4.513 | -4.979 | -4.946 | -4.970 | -4.734 | -4.394 | -3.855 | 70917     | NA      | NR_045501_13_-_1 |
| 4921511C10Rik | -0.859 | 0.233  | -0.499 | -0.206 | -0.285 | 0.066  | -0.924 | -1.140 | -0.556 | -0.646 | 70924     | NA      | NR_045502_3_+_1  |
| Dlg1          | -0.478 | -2.934 | 0.921  | -0.642 | 0.691  | -0.285 | -0.030 | 0.649  | -0.501 | -0.178 | 13383     | DLG1    | NR_045516_16_+_1 |
| Cldnd1        | 6.604  | 6.804  | 6.203  | 6.145  | 4.889  | 4.579  | 5.430  | 5.674  | 5.460  | 5.935  | 224250    | CLDND1  | NR_045517_16_+_1 |
| Cldnd1        | 5.432  | 5.547  | 4.717  | 4.385  | 3.289  | 2.848  | 3.603  | 3.927  | 4.135  | 4.431  | 224250    | CLDND1  | NR_045518_16_+_1 |
| Ranbp3        | 0.904  | 1.675  | 1.568  | 1.323  | 0.075  | 1.207  | 0.580  | 0.504  | 0.895  | 0.068  | 71810     | RANBP3  | NR_045519_17_+_1 |
| Lmf1          | -1.321 | -2.000 | -4.930 | -4.050 | -2.989 | -2.248 | -3.268 | -2.934 | -1.119 | -2.603 | 76483     | LMF1    | NR_045520_17_+_1 |
| Prmt1         | -0.255 | -1.049 | -0.354 | -1.144 | -1.781 | -1.710 | -0.748 | -2.126 | -0.854 | -1.423 | 15469     | PRMT1   | NR_045521_7_-_1  |
| March2        | -3.831 | -3.603 | -2.598 | -3.634 | -2.556 | -2.073 | -2.841 | -4.054 | -2.383 | -2.551 | 224703    | MARCH2  | NR_045522_17_-_1 |
| March2        | -4.019 | -0.139 | -0.576 | -1.178 | -3.860 | -2.652 | -1.433 | -3.615 | -1.992 | -2.332 | 224703    | MARCH2  | NR_045523_17_-_1 |
| Osbp1a        | -4.625 | 0.339  | -4.974 | -4.864 | -4.483 | -4.235 | -3.648 | -4.970 | -4.665 | -4.975 | 64291     | OSBPL1A | NR_045524_18_-_1 |
| Rbbp8         | -4.211 | -1.055 | -1.381 | -4.084 | -0.591 | -1.630 | -0.406 | -1.410 | -1.549 | 0.116  | 225182    | RBBP8   | NR_045526_18_+_1 |
| Rbbp8         | -4.819 | -4.781 | -2.432 | -1.831 | -1.947 | -3.221 | -1.278 | -2.316 | -1.807 | 0.155  | 225182    | RBBP8   | NR_045527_18_+_1 |
| Klc2          | -2.333 | 0.258  | 0.006  | 0.209  | 0.816  | 0.531  | 0.236  | -0.864 | -0.657 | -0.668 | 16594     | KLC2    | NR_045528_19_-_1 |
| Sh2d3c        | 1.050  | 0.538  | 1.774  | 1.316  | 1.334  | 2.580  | 1.381  | 1.352  | 3.037  | 2.408  | 27387     | SH2D3C  | NR_045535_2_+_1  |
| Spns1         | 1.072  | 1.536  | 2.006  | 0.039  | 1.298  | 1.243  | 0.594  | -1.452 | 1.061  | 1.249  | 73658     | SPNS1   | NR_045537_7_-_1  |
| Mllt10        | 4.325  | 4.696  | 4.440  | 4.365  | 4.637  | 4.455  | 4.464  | 4.474  | 3.570  | 3.984  | 17354     | MLLT10  | NR_045538_2_+_1  |
| Mllt10        | -0.686 | -0.776 | -1.492 | -1.467 | -1.374 | -1.520 | -3.486 | -2.256 | -1.941 | -4.807 | 17354     | MLLT10  | NR_045539_2_+_1  |
| Oprl1         | -4.981 | -4.981 | -4.826 | -4.978 | -4.975 | -4.976 | -4.960 | -4.981 | -4.859 | -4.981 | 18389     | OPRL1   | NR_045540_2_+_1  |
| Oprl1         | -4.981 | -4.981 | -4.584 | -4.975 | -4.961 | -4.976 | -4.890 | -4.985 | -4.672 | -4.981 | 18389     | OPRL1   | NR_045541_2_+_1  |
| Oprl1         | -4.981 | -4.981 | -4.505 | -4.972 | -4.953 | -4.977 | -4.863 | -4.985 | -4.624 | -4.981 | 18389     | OPRL1   | NR_045542_2_+_1  |
| Slc35c2       | 0.119  | 1.183  | 1.825  | 0.922  | 1.916  | 0.289  | 1.864  | 0.554  | -0.563 | -1.324 | 228875    | SLC35C2 | NR_045544_2_-_1  |
| Zfp410        | -0.178 | -0.125 | -2.842 | -0.091 | -0.476 | -0.296 | -0.073 | 0.759  | -1.048 | 0.025  | 52708     | ZNF410  | NR_045546_12_+_1 |
| Fut8          | 1.219  | 2.241  | 2.383  | 2.737  | 2.289  | 2.172  | 1.927  | 1.894  | 2.976  | 3.110  | 53618     | FUT8    | NR_045554_12_+_1 |
| Cdh23         | -3.472 | -3.332 | -3.896 | -4.080 | -4.079 | -4.725 | -3.556 | -3.541 | -0.801 | -4.008 | 22295     | CDH23   | NR_045556_10_-_1 |
| Ccdc77        | -0.238 | 1.043  | -1.220 | -0.642 | -0.535 | -0.341 | -0.109 | -0.438 | -0.580 | -0.495 | 67200     | CCDC77  | NR_045558_6_-_1  |
| Csf3r         | -3.937 | -4.756 | -4.840 | -2.281 | 0.033  | -1.539 | 1.600  | 2.998  | 5.004  | 4.750  | 12986     | CSF3R   | NR_045561_4_+_1  |
| Fam214b       | 1.373  | 1.437  | -0.679 | 0.903  | -1.012 | -0.545 | 0.299  | -1.765 | -0.364 | -2.961 | 230088    | FAM214B | NR_045567_4_-_1  |
| B4galt2       | -4.981 | -4.981 | -4.758 | -4.966 | -4.854 | -4.936 | -4.947 | -4.885 | -4.772 | -4.981 | 53418     | B4GALT2 | NR_045570_4_-_1  |
| Ubxn11        | -0.986 | -4.712 | -4.877 | -4.919 | -2.394 | -3.200 | -4.653 | -3.988 | -1.499 | -4.773 | 67586     | UBXN11  | NR_045571_4_+_1  |
| Mtfr1         | -4.606 | -4.443 | -4.584 | -3.673 | -3.205 | -4.888 | -4.549 | -4.935 | -4.475 | -4.850 | 67472     | MTFR1   | NR_045575_3_+_1  |
| Plk4          | -2.559 | -0.167 | 1.213  | 0.765  | -1.778 | -0.704 | -0.372 | -1.602 | -0.222 | -0.395 | 20873     | PLK4    | NR_045576_3_+_1  |
| St7l          | 3.079  | 2.824  | 2.448  | 2.390  | 2.299  | 1.405  | 2.290  | 2.631  | 2.657  | 2.242  | 229681    | ST7L    | NR_045578_3_+_1  |
| Slc12a4       | -0.875 | -2.657 | 0.211  | 0.824  | -0.196 | -1.219 | -0.234 | -3.280 | 0.764  | 0.495  | 20498     | SLC12A4 | NR_045594_8_-_1  |
| Gm15706       | 3.268  | 3.206  | 1.457  | 0.855  | 2.214  | 2.709  | 1.640  | 1.712  | 1.642  | 1.569  | 100039495 | NA      | NR_045598_6_+_1  |
| Elp3          | -1.535 | -4.316 | -2.165 | -1.448 | -0.914 | -3.709 | -4.857 | -2.191 | -4.797 | -4.883 | 74195     | ELP3    | NR_045599_14_-_1 |
| Alg9          | 0.553  | 1.554  | 0.695  | 1.721  | 0.860  | -0.503 | 1.901  | 0.304  | 2.046  | 2.067  | 102580    | ALG9    | NR_045601_9_+_1  |
| Tmem205       | -4.981 | -4.981 | -4.016 | -4.933 | -4.456 | -4.496 | -4.981 | -4.981 | -3.707 | -4.981 | 235043    | TMEM205 | NR_045606_9_-_1  |
| Mtf2          | 0.564  | 0.151  | 1.196  | 1.010  | 1.608  | 1.778  | 1.500  | 1.659  | 0.963  | 1.805  | 17765     | MTF2    | NR_045608_5_+_1  |
| Irf3          | 3.898  | 3.524  | 3.844  | 3.329  | 3.975  | 4.017  | 4.027  | 3.699  | 3.139  | 3.093  | 54131     | IRF3    | NR_045611_7_+_1  |
| 4930413G21Rik | 4.102  | 4.159  | 2.203  | 1.985  | 2.340  | 2.525  | 2.260  | 2.012  | 1.568  | 1.332  | 73951     | NA      | NR_045614_7_-_1  |
| Zfp410        | -1.194 | -0.722 | -1.840 | -1.865 | -1.169 | -1.621 | -0.473 | -1.945 | -0.437 | -0.374 | 52708     | ZNF410  | NR_045615_12_+_1 |
| 1700011804Rik | -4.981 | -4.981 | -3.376 | -4.987 | 0.002  | 1.243  | -2.602 | -3.308 | -3.823 | -3.510 | 100503727 | NA      | NR_045616_13_+_1 |
| Gm9958        | 2.425  | 0.688  | 0.354  | -1.032 | 0.124  | -0.895 | -0.624 | -1.111 | 0.079  | -0.701 | 791294    | NA      | NR_045618_5_+_1  |
| Gm9776        | 1.261  | -0.123 | 0.794  | 1.163  | 0.742  | 0.183  | 1.105  | 0.569  | 1.083  | 0.661  | 328309    | NA      | NR_045619_13_-_1 |
| 1700120C14Rik | -1.340 | -0.685 | -1.137 | -2.015 | -1.827 | -2.465 | -2.289 | -3.097 | -1.916 | -2.054 | 73600     | NA      | NR_045627_15_+_1 |
| Gm20199       | 3.189  | 3.529  | 3.661  | 3.550  | 3.962  | 3.944  | 3.361  | 3.034  | 3.129  | 3.582  | 100504377 | NA      | NR_045640_9_-_1  |
| F630111L10Rik | 6.695  | 6.834  | 6.550  | 6.429  | -3.804 | -1.424 | 0.891  | 2.441  | -1.634 | -3.816 | 320463    | NA      | NR_045641_3_-_1  |
| Tk2           | 3.607  | 3.548  | 3.920  | 3.559  | 3.749  | 3.865  | 3.351  | 3.893  | 3.671  | 3.429  | 57813     | TK2     | NR_045642_8_-_1  |
| 5930403L14Rik | -4.981 | -4.981 | -4.981 | -4.981 | -2.973 | 0.164  | -2.433 | -1.255 | -4.981 | -4.981 | 320939    | NA      | NR_045643_4_-_1  |
| BC037704      | 2.413  | 3.079  | 1.562  | 2.377  | 1.424  | 3.031  | 1.417  | 2.416  | 1.031  | 2.001  | 100502982 | NA      | NR_045645_19_+_1 |
| 4933432I03Rik | -3.563 | -4.981 | -4.616 | -3.876 | -4.516 | -4.270 | -3.850 | -4.825 | -2.605 | -3.386 | 71264     | NA      | NR_045657_14_-_1 |
| Gm5124        | 1.185  | 1.792  | -1.448 | -3.968 | -1.982 | -0.981 | -3.450 | -3.878 | -4.981 | -4.981 | 331392    | NA      | NR_045668_X_+_1  |
| Rasgrp4       | 0.911  | 1.811  | 1.179  | 0.840  | 1.143  | 1.186  | -0.020 | -1.504 | 1.020  | 2.390  | 233046    | RASGRP4 | NR_045676_7_+_1  |
| Gm16062       | 1.139  | 0.734  | 0.136  | -0.154 | -0.132 | -0.071 | 1.498  | 0.879  | 0.676  | 0.366  | 100504104 | NA      | NR_045686_11_+_1 |
| Gm9895        | -3.099 | -1.478 | -0.592 | 0.176  | -0.133 | 0.369  | -0.237 | -0.296 | -0.594 | -0.548 | 100503337 | NA      | NR_045687_19_+_1 |
| Hsf4          | -4.981 | -4.981 | -4.540 | -4.903 | -4.175 | -4.955 | -4.305 | -4.227 | -4.532 | -3.902 | 26386     | HSF4    | NR_045689_8_+_1  |
| Oxsr1         | -2.176 | 0.374  | -0.178 | -1.388 | -1.381 | -0.422 | 0.438  | -0.437 | -1.477 | -0.169 | 108737    | OXSR1   | NR_045693_9_-_1  |
| Gm21057       | -3.028 | -0.807 | -3.524 | -3.848 | -3.395 | -3.970 | -3.667 | -4.619 | -4.981 | -3.797 | 100859962 | NA      | NR_045695_7_-_1  |
| 9330133O14Rik | 5.257  | 4.700  | 3.823  | 3.869  | 4.519  | 4.673  | 4.251  | 4.019  | 3.901  | 3.952  | 100689703 | NA      | NR_045696_8_+_1  |
| 1700028E10Rik | -0.802 | 0.664  | -1.911 | -1.494 | -0.977 | -2.014 | -0.848 | -0.684 | -1.317 | -0.044 | 625175    | NA      | NR_045699_5_+_1  |
| 1700028E10Rik | -0.796 | -4.981 | -3.363 | -3.112 | -2.010 | -4.123 | -2.194 | -3.758 | -1.318 | -4.774 | 625175    | NA      | NR_045700_5_+_1  |
| C330013E15Rik | 1.858  | 1.490  | 0.094  | -0.061 | 0.291  | -0.172 | -0.232 | -0.195 | -0.203 | -0.237 | 78445     | NA      | NR_045701_15_-_1 |
| 1700105P06Rik | -3.090 | -4.981 | -3.106 | -4.152 | -4.417 | -4.533 | -4.970 | -3.897 | -4.981 | -4.316 | 654802    | NA      | NR_045703_19_+_1 |
| Gm7457        | -4.981 | -3.267 | -4.374 | -4.956 | -3.275 | -4.057 | -4.970 | -4.978 | -4.981 | -4.981 | 665037    | NA      | NR_045707_6_+_1  |
| Gm11944       | -3.682 | -3.315 | -3.333 | -3.377 | -2.679 | -3.805 | -4.221 | -3.778 | -2.727 | -3.461 | 100302648 | NA      | NR_045708_11_+_1 |
| 1700007L15Rik | 3.992  | 3.130  | 2.281  | 2.006  | 1.922  | 2.231  | 1.447  | 1.056  | 0.733  | -0.121 | 100502742 | NA      | NR_045709_16_-_1 |
| Gm9833        | -4.981 | -3.074 | -4.967 | -2.511 | -4.290 | -4.292 | -3.197 | -4.565 | -3.013 | -4.941 | 100041480 | NA      | NR_045710_3_+_1  |
| F420014N23Rik | -1.465 | -3.921 | -2.411 | -4.788 | -3.547 | -4.880 | -4.744 | -3.869 | -4.629 | -4.857 | 100038591 | NA      | NR_045715_10_+_1 |
| F420014N23Rik | -2.047 | 0.420  | -0.941 | -1.168 | -0.617 | -1.449 | -1.819 | -2.789 | -2.406 | -1.597 | 100038591 | NA      | NR_045716_10_+_1 |
| Fam219aos     | -4.981 | -4.981 | -3.496 | -4.581 | -4.651 | -4.996 | -4.580 | -4.898 | -3.531 | -2.867 | 76992     | NA      | NR_045726_4_+_1  |
| Gm16617       | -4.981 | -4.981 | 0.427  | 1.952  | -0.570 | 0.209  | -1.791 | -0.305 | -4.981 | -4.981 | 100502764 | NA      | NR_045728_14_-_1 |
| Nron          | -1.271 | -2.437 | -1.478 | -3.138 | -1.059 | -2.912 | -2.797 | -3.085 | -3.925 | -4.981 | 320482    | NA      | NR_045729_2_+_1  |

|               |        |        |        |        |        |        |        |        |        |        |           |       |                 |
|---------------|--------|--------|--------|--------|--------|--------|--------|--------|--------|--------|-----------|-------|-----------------|
| 4930509E16Rik | -0.743 | -2.239 | -4.258 | -3.766 | -2.260 | -2.708 | -2.415 | -3.960 | -2.086 | -4.981 | 75115     | NA    | NR_045735_9_-1  |
| 8030423F21Rik | -3.843 | -4.981 | -4.403 | -4.958 | -4.185 | -4.883 | -4.536 | -4.970 | -4.981 | -4.981 | 211001    | NA    | NR_045738_5_-1  |
| A630020A06    | -1.475 | -1.489 | -2.321 | -1.088 | -3.523 | -2.045 | -4.960 | -1.610 | -4.981 | -0.766 | 328489    | NA    | NR_045740_15_+1 |
| Gm10432       | -3.679 | -3.206 | 0.938  | -0.282 | -1.711 | -1.469 | -2.490 | -1.470 | -3.325 | -2.900 | 100038713 | NA    | NR_045741_12_+1 |
| Gm16853       | -2.185 | -1.523 | -2.743 | -3.680 | -2.926 | -3.711 | -3.351 | -3.606 | -3.531 | -4.981 | 330902    | NA    | NR_045742_9_-1  |
| Gm10865       | -3.243 | -2.997 | -2.262 | -3.992 | -3.878 | -4.238 | -4.057 | -3.689 | -2.342 | -3.288 | 100038602 | NA    | NR_045746_15_-1 |
| Mirt2         | -4.981 | -4.981 | -4.294 | -2.511 | -4.821 | -0.844 | -2.407 | -0.385 | -2.226 | -1.445 | 100038659 | NA    | NR_045747_15_-1 |
| Gm19710       | -0.778 | -2.468 | -1.948 | -1.726 | -1.002 | -0.716 | -1.123 | -2.376 | -2.685 | -1.908 | 100503469 | NA    | NR_045749_3_+1  |
| Gm16675       | 0.715  | 0.133  | 1.012  | 1.277  | 0.127  | -0.481 | 0.817  | 0.859  | 2.259  | 1.381  | 100503498 | NA    | NR_045750_8_-1  |
| 4930470H14Rik | 2.529  | 3.031  | 3.084  | 3.572  | 3.475  | 3.726  | 2.613  | 2.829  | 2.117  | 2.447  | 75815     | NA    | NR_045764_17_-1 |
| A530072M11Rik | 1.480  | 1.008  | -0.874 | -1.663 | 0.765  | 0.863  | 0.286  | -1.381 | -0.469 | -0.242 | 100415915 | NA    | NR_045765_4_+1  |
| Gm10509       | 2.955  | 2.588  | 1.771  | 2.061  | 2.096  | 1.707  | 2.140  | 2.037  | 3.084  | 3.557  | 100310809 | NA    | NR_045766_17_+1 |
| Gm15350       | -3.668 | -4.981 | -4.001 | -2.892 | -4.292 | -4.301 | -4.138 | -4.571 | -4.981 | -3.566 | 100504249 | NA    | NR_045775_8_-1  |
| 9530080O11Rik | -1.568 | -0.972 | -2.443 | -2.938 | -2.965 | -3.739 | -4.952 | -4.370 | -4.981 | -4.981 | 319247    | NA    | NR_045776_4_-1  |
| 9530080O11Rik | -4.981 | -4.981 | -4.957 | -4.365 | -4.673 | -4.718 | -4.981 | -4.981 | -4.981 | -4.981 | 319247    | NA    | NR_045777_4_-1  |
| Ubl4a         | 0.078  | 0.057  | -0.854 | -0.838 | -0.772 | -1.507 | -1.465 | -1.635 | -2.144 | -4.955 | 27643     | UBL4A | NR_045779_X_-1  |
| Zfp652os      | -1.277 | -2.437 | -1.411 | -2.196 | -2.038 | -3.617 | -1.412 | -2.726 | 0.616  | -0.209 | 432396    | NA    | NR_045780_11_-1 |
| I730030J21Rik | 0.099  | 1.359  | -1.079 | -1.568 | 1.325  | 0.915  | 0.680  | 0.479  | -2.507 | -2.036 | 619313    | NA    | NR_045781_15_-1 |
| I730030J21Rik | 1.671  | 1.443  | -1.895 | -1.435 | 1.435  | 1.247  | 1.127  | 0.714  | -2.264 | -1.476 | 619313    | NA    | NR_045782_15_-1 |
| Gm10814       | -3.090 | -1.751 | -1.898 | -3.522 | -4.108 | -3.804 | -3.074 | -3.962 | -4.231 | -2.963 | 100502985 | NA    | NR_045783_19_+1 |
| Gm10390       | -4.981 | -1.601 | -4.228 | -4.560 | -2.836 | -3.713 | -4.732 | -4.384 | -2.669 | -2.859 | 100503427 | NA    | NR_045784_10_+1 |
| Gm16907       | -0.043 | 0.396  | -0.182 | -1.507 | -0.241 | -0.249 | -1.031 | -0.697 | 0.767  | 0.591  | 100504114 | NA    | NR_045794_13_-1 |
| Gm16702       | 0.367  | 0.815  | 1.638  | 1.140  | 1.526  | 1.237  | 1.258  | 1.314  | 1.024  | 0.374  | 100504601 | NA    | NR_045795_17_-1 |
| 1810034E14Rik | 6.329  | 4.955  | 1.191  | 0.291  | 0.723  | -0.088 | 1.174  | 0.743  | 2.702  | 1.599  | 66503     | NA    | NR_045798_13_+1 |
| 4930417O22Rik | -4.981 | -4.981 | -4.959 | -4.520 | -4.796 | -4.960 | -4.981 | -4.981 | -4.981 | -4.981 | 73887     | NA    | NR_045800_11_+1 |
| 4931431C16Rik | 2.162  | 2.363  | 2.821  | 3.065  | 1.470  | 1.396  | 1.764  | 2.020  | 2.254  | 1.844  | 74364     | NA    | NR_045807_5_-1  |
| D17Ert648e    | -4.981 | -4.981 | -2.986 | -4.248 | -4.363 | -4.428 | -4.366 | -4.853 | -2.764 | -3.797 | 52027     | NA    | NR_045808_17_-1 |
| 4933408J17Rik | -3.698 | -4.981 | -4.651 | -4.998 | -3.482 | -4.769 | -2.975 | -4.555 | -1.773 | -4.981 | 74454     | NA    | NR_045810_10_+1 |
| 4930599N23Rik | -4.981 | -4.981 | -0.263 | -0.657 | -0.925 | -1.789 | -0.497 | -1.809 | -0.331 | -1.270 | 75379     | NA    | NR_045813_6_+1  |
| A930024E05Rik | 1.002  | 1.447  | 0.256  | -0.349 | 0.498  | 0.103  | -0.214 | -0.871 | -1.052 | -2.426 | 109202    | NA    | NR_045820_5_+1  |
| 6330418K02Rik | 2.279  | 1.939  | 0.937  | 0.432  | 2.705  | 2.865  | 2.516  | 1.787  | 2.068  | 1.748  | 69004     | NA    | NR_045821_5_+1  |
| Gm4890        | 2.061  | 1.061  | 0.726  | -0.407 | 0.859  | 0.567  | 0.755  | -0.377 | -0.067 | -1.239 | 234479    | NA    | NR_045822_8_+1  |
| Gm4890        | -3.249 | -4.708 | -4.911 | -3.923 | -4.227 | -4.981 | -4.006 | -4.887 | -4.981 | -4.968 | 234479    | NA    | NR_045823_8_+1  |
| Alkbh3os1     | -4.981 | -2.336 | -2.334 | -4.199 | -3.227 | -4.134 | -2.084 | -3.823 | -2.720 | -3.166 | 70852     | NA    | NR_045827_2_+1  |
| 492151117Rik  | -4.981 | -4.981 | -1.709 | -3.143 | -0.221 | -0.851 | -2.301 | -3.029 | -0.892 | -1.072 | 70858     | NA    | NR_045829_12_-1 |
| 4933408N05Rik | -4.981 | -4.981 | -4.789 | -4.566 | -4.360 | -4.668 | -4.071 | -4.968 | -4.981 | -4.981 | 71122     | NA    | NR_045831_8_-1  |
| A430090L17Rik | -2.205 | -2.883 | -2.515 | -2.486 | -1.954 | -2.651 | -2.229 | -3.625 | -1.204 | -0.738 | 319803    | NA    | NR_045836_13_-1 |
| 9130227L01Rik | -4.981 | -4.981 | -3.363 | -4.185 | -3.330 | -3.681 | -3.790 | -1.577 | -4.981 | -3.853 | 329159    | NA    | NR_045837_1_+1  |
| A730036I17Rik | -4.981 | -3.315 | -4.973 | -2.874 | -3.175 | -2.507 | -2.992 | -3.743 | -4.981 | -3.386 | 329513    | NA    | NR_045838_2_+1  |
| 4933416M07Rik | -4.981 | -4.981 | 0.868  | 0.534  | 0.000  | -0.328 | -0.873 | -1.559 | -1.001 | -1.159 | 71082     | NA    | NR_045840_8_+1  |
| Gm5547        | 7.893  | 7.330  | 3.487  | 2.385  | 6.308  | 5.266  | 5.998  | 4.763  | 3.197  | 3.000  | 433637    | NA    | NR_045845_3_+1  |
| D930028M14Rik | -4.778 | -4.772 | -4.918 | -4.954 | -4.952 | -4.976 | -4.763 | -4.947 | -4.699 | -4.910 | 434147    | NA    | NR_045847_7_+1  |
| D930028M14Rik | -2.013 | -2.895 | -3.641 | -2.764 | -3.043 | -1.298 | 0.124  | 0.105  | 1.656  | 0.921  | 434147    | NA    | NR_045848_7_+1  |
| 4933417D19Rik | -2.126 | -2.126 | -2.798 | -3.051 | -4.342 | -3.534 | -3.851 | -3.647 | -0.976 | -2.923 | 71186     | NA    | NR_045849_8_+1  |
| 4933433G19Rik | -4.981 | -4.981 | -4.751 | -4.818 | -4.533 | -4.706 | -4.370 | -4.845 | -4.981 | -4.981 | 71226     | NA    | NR_045851_13_-1 |
| Gm14634       | -0.658 | -0.440 | -2.078 | -1.504 | -1.099 | -0.653 | -2.193 | -2.003 | -2.078 | -1.668 | 552913    | NA    | NR_045852_X_+1  |
| 5430427M07Rik | -4.981 | -4.981 | -4.944 | -4.944 | -4.990 | -4.701 | -4.514 | -4.935 | -3.738 | -4.981 | 71349     | NA    | NR_045858_12_+1 |
| Gm6313        | -3.189 | -3.267 | -4.992 | -4.260 | -4.569 | -4.945 | -4.968 | -4.975 | -3.603 | -4.316 | 622319    | NA    | NR_045867_6_-1  |
| 4930428O21Rik | -4.981 | -4.981 | -4.716 | -2.735 | -2.580 | -4.710 | -4.967 | -4.596 | -4.981 | -4.981 | 654809    | NA    | NR_045871_5_-1  |
| Gm9054        | 1.515  | 3.451  | 1.109  | 2.777  | -0.166 | 1.750  | -0.949 | 1.490  | -1.552 | 0.924  | 668224    | NA    | NR_045872_3_+1  |
| Gm11201       | -4.981 | -4.981 | -3.196 | -3.223 | -1.270 | -2.397 | -1.477 | -3.069 | -0.922 | -1.279 | 790910    | NA    | NR_045873_11_+1 |
| Gm15413       | -1.949 | -0.945 | -4.258 | -4.950 | -4.941 | -4.811 | -4.971 | -4.805 | -4.981 | -4.981 | 791381    | NA    | NR_045874_7_-1  |
| Bcas3os1      | -4.981 | -1.773 | -2.307 | -2.882 | -3.127 | -2.910 | -2.320 | -3.335 | -2.953 | -3.527 | 71489     | NA    | NR_045875_11_-1 |
| F630206G17Rik | 1.339  | 1.575  | -2.166 | -2.459 | -1.902 | -2.834 | -1.004 | -2.295 | -2.390 | -1.977 | 100009664 | NA    | NR_045876_11_+1 |
| 9030404E10Rik | -2.620 | -1.347 | -2.966 | -3.672 | -2.255 | -3.771 | -0.940 | -2.391 | -1.031 | -2.225 | 71528     | NA    | NR_045878_16_-1 |
| Gm15612       | -1.681 | -4.981 | -4.959 | -3.380 | -4.744 | -4.368 | -4.413 | -4.071 | -4.981 | -2.993 | 100038356 | NA    | NR_045880_6_+1  |
| Dnmt3aos      | -0.907 | -4.981 | -1.990 | -2.968 | -0.160 | -0.796 | -0.557 | -2.840 | -3.322 | -4.981 | 100038522 | NA    | NR_045884_12_-1 |
| Gm10658       | -1.399 | 0.162  | -1.436 | -2.551 | -1.240 | -1.018 | -2.185 | -2.451 | -2.394 | -1.654 | 100038566 | NA    | NR_045886_9_-1  |
| 3200001D21Rik | -1.254 | -0.027 | -0.989 | -1.587 | -0.986 | -2.741 | -1.789 | -2.507 | -2.078 | -2.383 | 71818     | NA    | NR_045888_12_-1 |
| Gm10791       | -0.847 | -4.981 | -1.589 | -0.900 | -0.561 | -1.992 | -1.219 | -1.882 | -1.939 | -1.003 | 100038614 | NA    | NR_045889_16_+1 |
| Snhg15        | 4.890  | 5.083  | 4.556  | 4.479  | 6.273  | 5.718  | 6.027  | 5.214  | 3.789  | 3.095  | 100041286 | NA    | NR_045893_11_-1 |
| Gm13446       | -4.981 | -4.981 | -4.981 | -4.981 | -4.979 | -4.728 | -4.981 | -4.981 | -4.981 | -4.981 | 100042194 | NA    | NR_045894_2_-1  |
| Gm13546       | -2.606 | 1.974  | -0.634 | 0.665  | -0.914 | 0.693  | -1.955 | -0.815 | -3.454 | -0.313 | 100042926 | NA    | NR_045895_2_+1  |
| Gm13546       | -1.112 | 0.641  | -0.600 | -1.150 | -0.950 | -1.739 | -1.308 | -1.722 | -4.704 | -1.282 | 100042926 | NA    | NR_045896_2_+1  |
| Gm13031       | 2.368  | 0.184  | -2.442 | -4.568 | -4.975 | -4.975 | -3.184 | -4.399 | -3.568 | -2.769 | 100126227 | NA    | NR_045911_4_-1  |
| Frs3os        | -4.981 | -4.981 | -4.941 | -4.971 | -4.884 | -4.975 | -4.939 | -4.977 | -4.981 | -4.630 | 100126242 | NA    | NR_045912_17_-1 |
| Frs3os        | -4.981 | -4.981 | -4.532 | -4.806 | -3.601 | -4.167 | -4.532 | -4.853 | -4.981 | -3.710 | 100126242 | NA    | NR_045913_17_-1 |
| Ino8odos      | -1.091 | -1.584 | -1.240 | -1.764 | -1.987 | -1.997 | 0.465  | -0.803 | -0.076 | -0.189 | 100380944 | NA    | NR_045914_1_+1  |
| Ino8odos      | -2.516 | -0.755 | -2.234 | -1.532 | -1.996 | -3.635 | -1.350 | -1.509 | 0.138  | -0.537 | 100380944 | NA    | NR_045915_1_+1  |
| 9530027J09Rik | -1.083 | -2.469 | -3.072 | -3.627 | -2.099 | -1.897 | -2.067 | -1.866 | -1.136 | -1.574 | 100500713 | NA    | NR_045916_X_-1  |
| 1700054M17Rik | -3.349 | -4.981 | -2.288 | -3.709 | -4.910 | -3.962 | -4.177 | -4.824 | -4.981 | -4.981 | 73358     | NA    | NR_045919_2_+1  |
| Slfn5os       | -4.981 | -4.981 | -4.970 | -4.970 | -4.953 | -4.953 | -4.970 | -4.976 | -4.981 | -4.981 | 76392     | NA    | NR_045932_11_-1 |
| Gm4827        | -2.134 | -4.981 | -1.122 | -0.834 | 0.855  | 2.170  | -0.124 | -0.527 | -2.792 | -3.816 | 224180    | NA    | NR_045935_16_-1 |
| Gm13032       | 2.929  | 0.988  | -4.423 | -2.180 | -3.727 | -4.635 | -4.016 | -4.710 | -4.394 | -4.981 | 100049161 | NA    | NR_045944_4_+1  |

|               |        |        |        |        |        |        |        |        |        |        |           |    |                     |
|---------------|--------|--------|--------|--------|--------|--------|--------|--------|--------|--------|-----------|----|---------------------|
| Tomm6os       | -0.904 | -1.593 | -0.967 | -1.229 | -0.900 | -0.582 | -1.072 | -1.367 | -0.163 | -1.311 | 100415787 | NA | NR_045945_17_+1     |
| Scep1os       | -4.981 | -3.092 | -4.287 | -4.643 | -4.180 | -4.573 | -3.479 | -4.046 | -4.981 | -4.981 | 73921     | NA | NR_045955_11_+1     |
| 49304471I8Rik | -1.778 | -3.315 | -4.981 | -4.981 | -4.928 | -4.978 | -3.981 | -4.981 | -3.738 | -4.981 | 73961     | NA | NR_045959_14_+1     |
| Gm1976        | -4.083 | -3.553 | -4.408 | -4.713 | -4.731 | -4.928 | -4.713 | -4.824 | -4.848 | -4.677 | 100038746 | NA | NR_045963_17_-1     |
| Gm1976        | 1.947  | -0.343 | 0.189  | -1.624 | -0.109 | -2.471 | 0.357  | -1.992 | 0.232  | -3.785 | 100038746 | NA | NR_045964_17_-1     |
| A730085K08Rik | -4.981 | -4.981 | -4.959 | -4.767 | -4.973 | -4.667 | -4.981 | -4.981 | -3.823 | -3.855 | 654800    | NA | NR_045967_9_-1      |
| Gm16938       | 0.625  | 1.310  | -0.973 | -2.002 | -3.405 | -4.925 | -4.577 | -3.190 | -2.160 | -4.887 | 330599    | NA | NR_045969_7_+1      |
| Gm16938       | 0.055  | -1.227 | -2.801 | -3.597 | -4.742 | -4.911 | -4.824 | -4.838 | -4.254 | -1.755 | 330599    | NA | NR_045970_7_+1      |
| Gm16938       | 1.062  | 0.857  | -3.502 | -2.080 | -4.305 | -4.878 | -3.358 | -3.307 | -1.970 | -4.861 | 330599    | NA | NR_045971_7_+1      |
| Gm16938       | -2.682 | -0.443 | -3.905 | -1.525 | -2.428 | -3.290 | -3.999 | -2.845 | -1.487 | -4.454 | 330599    | NA | NR_045972_7_+1      |
| 4930528D03Rik | -4.981 | -4.981 | -4.092 | -4.582 | -3.922 | -4.639 | -3.667 | -4.758 | -3.088 | -4.981 | 75223     | NA | NR_045977_13_+1     |
| 4930471M09Rik | -3.843 | -2.353 | -4.799 | -4.602 | -4.956 | -4.613 | -4.920 | -4.680 | -4.981 | -4.981 | 75787     | NA | NR_045980_6_-1      |
| 9430018G01Rik | -3.349 | -4.981 | -4.197 | -4.292 | -3.973 | -4.121 | -4.890 | -3.710 | -3.351 | -4.342 | 319812    | NA | NR_045988_6_+1      |
| 4930578M01Rik | -2.842 | -2.616 | -2.784 | -3.428 | -2.449 | -3.973 | -1.901 | -3.015 | -3.471 | -3.210 | 75951     | NA | NR_045991_15_+1     |
| Tmem150cos    | -4.981 | -4.981 | -3.929 | -4.790 | -4.483 | -4.546 | -4.967 | -4.974 | -4.981 | -4.981 | 76003     | NA | NR_045993_5_+1      |
| 1110019D14Rik | 0.010  | 0.622  | 1.168  | 1.484  | 0.965  | 1.261  | 1.558  | 1.363  | 0.841  | 1.609  | 76311     | NA | NR_045995_6_+1      |
| 1700113A16Rik | 4.336  | 4.178  | 2.709  | 2.488  | 3.016  | 2.725  | 3.479  | 2.840  | 2.983  | 2.718  | 76642     | NA | NR_045997_3_-1      |
| 9130221H12Rik | 1.070  | 0.748  | 0.226  | 0.420  | 1.485  | 0.582  | 1.511  | 0.199  | 1.517  | 0.908  | 77124     | NA | NR_046001_7_+1      |
| 4933406J10Rik | -4.981 | 2.885  | -3.552 | -4.469 | -3.802 | -4.520 | -3.235 | -4.754 | -3.738 | -4.981 | 77800     | NA | NR_046004_7_-1      |
| 2310010J17Rik | -1.863 | -4.981 | -2.287 | -4.231 | -2.438 | -3.962 | -2.629 | -2.951 | -2.537 | -2.028 | 78329     | NA | NR_046006_7_-1      |
| 2310010J17Rik | 1.846  | 1.669  | 1.082  | 0.069  | 0.906  | 0.609  | 0.695  | -0.065 | -0.039 | -0.541 | 78329     | NA | NR_046007_7_-1      |
| Particl       | 2.897  | 2.143  | 2.956  | 2.467  | 2.496  | 1.825  | 2.658  | 2.052  | 2.666  | 1.983  | 78108     | NA | NR_046011_6_+1      |
| Gm1720        | -4.981 | -4.981 | -2.083 | -2.111 | -0.809 | -1.210 | 1.747  | 1.305  | -4.981 | -4.981 | 382255    | NA | NR_046015_X_+1      |
| 9530052E02Rik | -4.981 | -4.981 | -4.978 | -3.872 | -2.698 | -4.558 | -4.727 | -4.575 | -4.981 | -4.981 | 619321    | NA | NR_046017_8_+1      |
| 2700070H01Rik | -4.981 | -3.204 | -2.809 | -4.104 | -2.087 | -2.858 | -3.112 | -4.421 | -3.644 | -4.316 | 72609     | NA | NR_046019_14_+1     |
| Gm6416        | -4.981 | -4.981 | -2.560 | -3.086 | -3.802 | -4.859 | -4.970 | -4.609 | -4.394 | -4.981 | 623312    | NA | NR_046023_13_+1     |
| Gm15713       | 0.265  | 0.099  | -1.413 | -1.906 | -2.662 | -3.549 | -2.404 | -4.773 | -2.390 | -4.981 | 626693    | NA | NR_046026_16_-1     |
| Slc36a1os     | -4.981 | -4.981 | -2.490 | -2.476 | -3.079 | -4.151 | -4.416 | -4.446 | -3.491 | -3.095 | 74045     | NA | NR_046034_11_-1     |
| Gm13710       | 0.788  | 0.182  | 2.836  | 3.621  | 0.313  | 1.260  | 0.958  | 2.568  | -1.466 | -0.528 | 672763    | NA | NR_046046_2_-1      |
| Gm10677       | -4.981 | 1.315  | 1.772  | 1.152  | -4.958 | -3.446 | -2.513 | -2.352 | -4.981 | -4.981 | 100038460 | NA | NR_046048_9_-1      |
| 4931430N09Rik | -4.981 | -4.981 | -4.972 | -4.972 | -4.889 | -4.606 | -4.981 | -4.981 | -4.981 | -4.981 | 74363     | NA | NR_046053_6_+1      |
| Gm10640       | -3.668 | -4.981 | -4.103 | -4.946 | -3.886 | -4.950 | -4.428 | -4.523 | -4.981 | -4.981 | 100038516 | NA | NR_046062_7_+1      |
| Gm12409       | 0.936  | 1.590  | -4.679 | -4.298 | -3.757 | -4.713 | -3.926 | -3.237 | -1.905 | -1.759 | 100040567 | NA | NR_046068_4_-1      |
| Gm2848        | -1.245 | 0.585  | -1.248 | -1.977 | -0.386 | 0.793  | -0.450 | 0.384  | -0.576 | 0.181  | 100040572 | NA | NR_046069_13_-1     |
| Gm25018       | -3.795 | -3.065 | -3.872 | -4.289 | -4.402 | -4.738 | -3.934 | -4.626 | -4.205 | -4.239 | 100861480 | NA | NR_046127_8_-1      |
| Gm25018       | -3.795 | -3.065 | -3.872 | -4.289 | -4.402 | -4.738 | -3.934 | -4.626 | -4.205 | -4.239 | 100861480 | NA | NR_046127_dup1_8_-1 |
| Gm25018       | -3.795 | -3.065 | -3.872 | -4.289 | -4.402 | -4.738 | -3.934 | -4.626 | -4.205 | -4.239 | 100861480 | NA | NR_046127_dup2_8_-1 |
| Gm25018       | -3.795 | -3.065 | -3.872 | -4.289 | -4.402 | -4.738 | -3.934 | -4.626 | -4.205 | -4.239 | 100861480 | NA | NR_046127_dup3_8_-1 |
| Gm25018       | -3.795 | -3.065 | -3.872 | -4.289 | -4.402 | -4.738 | -3.934 | -4.626 | -4.205 | -4.239 | 100861480 | NA | NR_046127_dup4_8_-1 |
| Gm25018       | -3.795 | -3.065 | -3.872 | -4.289 | -4.402 | -4.738 | -3.934 | -4.626 | -4.205 | -4.239 | 100861480 | NA | NR_046127_dup5_8_-1 |
| Gm25018       | -3.795 | -3.065 | -3.872 | -4.289 | -4.402 | -4.738 | -3.934 | -4.626 | -4.205 | -4.239 | 100861480 | NA | NR_046127_dup6_8_-1 |
| Gm25018       | -3.795 | -3.065 | -3.872 | -4.289 | -4.402 | -4.738 | -3.934 | -4.626 | -4.205 | -4.239 | 100861480 | NA | NR_046127_dup7_8_-1 |
| Gm25018       | -3.795 | -3.065 | -3.872 | -4.289 | -4.402 | -4.738 | -3.934 | -4.626 | -4.205 | -4.239 | 100861480 | NA | NR_046127_dup8_8_-1 |
| Gm25018       | -3.795 | -3.065 | -3.872 | -4.289 | -4.402 | -4.738 | -3.934 | -4.626 | -4.205 | -4.239 | 100861480 | NA | NR_046127_dup9_8_-1 |
| Gm26391       | -3.795 | -3.065 | -3.872 | -4.289 | -4.402 | -4.738 | -3.934 | -4.626 | -4.205 | -4.239 | 100861488 | NA | NR_046140_8_-1      |
| Gm26391       | -3.795 | -3.065 | -3.872 | -4.289 | -4.402 | -4.738 | -3.934 | -4.626 | -4.205 | -4.239 | 100861488 | NA | NR_046140_dup1_8_-1 |
| Gm26391       | -3.795 | -3.065 | -3.872 | -4.289 | -4.402 | -4.738 | -3.934 | -4.626 | -4.205 | -4.239 | 100861488 | NA | NR_046140_dup2_8_-1 |
| Gm26391       | -3.795 | -3.065 | -3.872 | -4.289 | -4.402 | -4.738 | -3.934 | -4.626 | -4.205 | -4.239 | 100861488 | NA | NR_046140_dup3_8_-1 |
| Gm26391       | -3.795 | -3.065 | -3.872 | -4.289 | -4.402 | -4.738 | -3.934 | -4.626 | -4.205 | -4.239 | 100861488 | NA | NR_046140_dup4_8_-1 |
| Gm26391       | -3.795 | -3.065 | -3.872 | -4.289 | -4.402 | -4.738 | -3.934 | -4.626 | -4.205 | -4.239 | 100861488 | NA | NR_046140_dup5_8_-1 |
| Gm26391       | -3.795 | -3.065 | -3.872 | -4.289 | -4.402 | -4.738 | -3.934 | -4.626 | -4.205 | -4.239 | 100861488 | NA | NR_046140_dup6_8_-1 |
| Gm26391       | -3.795 | -3.065 | -3.872 | -4.289 | -4.402 | -4.738 | -3.934 | -4.626 | -4.205 | -4.239 | 100861488 | NA | NR_046140_dup7_8_-1 |
| Gm26391       | -3.795 | -3.065 | -3.872 | -4.289 | -4.402 | -4.738 | -3.934 | -4.626 | -4.205 | -4.239 | 100861488 | NA | NR_046140_dup8_8_-1 |
| Gm26391       | -3.795 | -3.065 | -3.872 | -4.289 | -4.402 | -4.738 | -3.934 | -4.626 | -4.205 | -4.239 | 100861488 | NA | NR_046140_dup9_8_-1 |
| Gm22109       | -3.795 | -3.065 | -3.872 | -4.289 | -4.402 | -4.738 | -3.934 | -4.626 | -4.205 | -4.239 | 100861494 | NA | NR_046147_8_-1      |
| Gm22109       | -3.795 | -3.065 | -3.872 | -4.289 | -4.402 | -4.738 | -3.934 | -4.626 | -4.205 | -4.239 | 100861494 | NA | NR_046147_dup1_8_-1 |
| Gm22109       | -3.795 | -3.065 | -3.872 | -4.289 | -4.402 | -4.738 | -3.934 | -4.626 | -4.205 | -4.239 | 100861494 | NA | NR_046147_dup2_8_-1 |
| Gm22109       | -3.795 | -3.065 | -3.872 | -4.289 | -4.402 | -4.738 | -3.934 | -4.626 | -4.205 | -4.239 | 100861494 | NA | NR_046147_dup3_8_-1 |
| Gm22109       | -3.795 | -3.065 | -3.872 | -4.289 | -4.402 | -4.738 | -3.934 | -4.626 | -4.205 | -4.239 | 100861494 | NA | NR_046147_dup4_8_-1 |
| Gm22109       | -3.795 | -3.065 | -3.872 | -4.289 | -4.402 | -4.738 | -3.934 | -4.626 | -4.205 | -4.239 | 100861494 | NA | NR_046147_dup5_8_-1 |
| Gm22109       | -3.795 | -3.065 | -3.872 | -4.289 | -4.402 | -4.738 | -3.934 | -4.626 | -4.205 | -4.239 | 100861494 | NA | NR_046147_dup6_8_-1 |
| Gm22109       | -3.795 | -3.065 | -3.872 | -4.289 | -4.402 | -4.738 | -3.934 | -4.626 | -4.205 | -4.239 | 100861494 | NA | NR_046147_dup7_8_-1 |
| Gm22109       | -3.795 | -3.065 | -3.872 | -4.289 | -4.402 | -4.738 | -3.934 | -4.626 | -4.205 | -4.239 | 100861494 | NA | NR_046147_dup8_8_-1 |
| Gm22109       | -3.795 | -3.065 | -3.872 | -4.289 | -4.402 | -4.738 | -3.934 | -4.626 | -4.205 | -4.239 | 100861494 | NA | NR_046147_dup9_8_-1 |
| Gm25212       | -3.795 | -3.065 | -3.872 | -4.289 | -4.402 | -4.738 | -3.934 | -4.626 | -4.205 | -4.239 | 100861499 | NA | NR_046152_8_-1      |
| Gm25212       | -3.795 | -3.065 | -3.872 | -4.289 | -4.402 | -4.738 | -3.934 | -4.626 | -4.205 | -4.239 | 100861499 | NA | NR_046152_dup1_8_-1 |
| Gm25212       | -3.795 | -3.065 | -3.872 | -4.289 | -4.402 | -4.738 | -3.934 | -4.626 | -4.205 | -4.239 | 100861499 | NA | NR_046152_dup2_8_-1 |
| Gm25212       | -3.795 | -3.065 | -3.872 | -4.289 | -4.402 | -4.738 | -3.934 | -4.626 | -4.205 | -4.239 | 100861499 | NA | NR_046152_dup3_8_-1 |
| Gm25212       | -3.795 | -3.065 | -3.872 | -4.289 | -4.402 | -4.738 | -3.934 | -4.626 | -4.205 | -4.239 | 100861499 | NA | NR_046152_dup4_8_-1 |
| Gm25212       | -3.795 | -3.065 | -3.872 | -4.289 | -4.402 | -4.738 | -3.934 | -4.626 | -4.205 | -4.239 | 100861499 | NA | NR_046152_dup5_8_-1 |
| Gm25212       | -3.795 | -3.065 | -3.872 | -4.289 | -4.402 | -4.738 | -3.934 | -4.626 | -4.205 | -4.239 | 100861499 | NA | NR_046152_dup6_8_-1 |
| Gm25212       | -3.795 | -3.065 | -3.872 | -4.289 | -4.402 | -4.738 | -3.934 | -4.626 | -4.205 | -4.239 | 100861499 | NA | NR_046152_dup7_8_-1 |
| Gm25212       | -3.795 | -3.065 | -3.872 | -4.289 | -4.402 | -4.738 | -3.934 | -4.626 | -4.205 | -4.239 | 100861499 | NA | NR_046152_dup8_8_-1 |
| Gm25212       | -3.795 | -3.065 | -3.872 | -4.289 | -4.402 | -4.738 | -3.934 | -4.626 | -4.205 | -4.239 | 100861499 | NA | NR_046152_dup9_8_-1 |

|               |        |        |        |        |        |        |        |        |        |        |           |                 |                     |
|---------------|--------|--------|--------|--------|--------|--------|--------|--------|--------|--------|-----------|-----------------|---------------------|
| Gm22291       | -3.795 | -3.065 | -3.872 | -4.289 | -4.402 | -4.738 | -3.934 | -4.626 | -4.205 | -4.239 | 100861501 | NA              | NR_046154_8_-1      |
| Gm22291       | -3.795 | -3.065 | -3.872 | -4.289 | -4.402 | -4.738 | -3.934 | -4.626 | -4.205 | -4.239 | 100861501 | NA              | NR_046154_dup1_8_-1 |
| Gm22291       | -3.795 | -3.065 | -3.872 | -4.289 | -4.402 | -4.738 | -3.934 | -4.626 | -4.205 | -4.239 | 100861501 | NA              | NR_046154_dup2_8_-1 |
| Gm22291       | -3.795 | -3.065 | -3.872 | -4.289 | -4.402 | -4.738 | -3.934 | -4.626 | -4.205 | -4.239 | 100861501 | NA              | NR_046154_dup3_8_-1 |
| Gm22291       | -3.795 | -3.065 | -3.872 | -4.289 | -4.402 | -4.738 | -3.934 | -4.626 | -4.205 | -4.239 | 100861501 | NA              | NR_046154_dup4_8_-1 |
| Gm22291       | -3.795 | -3.065 | -3.872 | -4.289 | -4.402 | -4.738 | -3.934 | -4.626 | -4.205 | -4.239 | 100861501 | NA              | NR_046154_dup5_8_-1 |
| Gm22291       | -3.795 | -3.065 | -3.872 | -4.289 | -4.402 | -4.738 | -3.934 | -4.626 | -4.205 | -4.239 | 100861501 | NA              | NR_046154_dup6_8_-1 |
| Gm22291       | -3.795 | -3.065 | -3.872 | -4.289 | -4.402 | -4.738 | -3.934 | -4.626 | -4.205 | -4.239 | 100861501 | NA              | NR_046154_dup7_8_-1 |
| Gm22291       | -3.795 | -3.065 | -3.872 | -4.289 | -4.402 | -4.738 | -3.934 | -4.626 | -4.205 | -4.239 | 100861501 | NA              | NR_046154_dup8_8_-1 |
| Gm22291       | -3.795 | -3.065 | -3.872 | -4.289 | -4.402 | -4.738 | -3.934 | -4.626 | -4.205 | -4.239 | 100861501 | NA              | NR_046154_dup9_8_-1 |
| Gm23284       | -3.795 | -3.065 | -3.872 | -4.289 | -4.402 | -4.738 | -3.934 | -4.626 | -4.205 | -4.239 | 100861502 | NA              | NR_046155_8_-1      |
| Gm23284       | -3.795 | -3.065 | -3.872 | -4.289 | -4.402 | -4.738 | -3.934 | -4.626 | -4.205 | -4.239 | 100861502 | NA              | NR_046155_dup1_8_-1 |
| Gm23284       | -3.795 | -3.065 | -3.872 | -4.289 | -4.402 | -4.738 | -3.934 | -4.626 | -4.205 | -4.239 | 100861502 | NA              | NR_046155_dup2_8_-1 |
| Gm23284       | -3.795 | -3.065 | -3.872 | -4.289 | -4.402 | -4.738 | -3.934 | -4.626 | -4.205 | -4.239 | 100861502 | NA              | NR_046155_dup3_8_-1 |
| Gm23284       | -3.795 | -3.065 | -3.872 | -4.289 | -4.402 | -4.738 | -3.934 | -4.626 | -4.205 | -4.239 | 100861502 | NA              | NR_046155_dup4_8_-1 |
| Gm23284       | -3.795 | -3.065 | -3.872 | -4.289 | -4.402 | -4.738 | -3.934 | -4.626 | -4.205 | -4.239 | 100861502 | NA              | NR_046155_dup5_8_-1 |
| Gm23284       | -3.795 | -3.065 | -3.872 | -4.289 | -4.402 | -4.738 | -3.934 | -4.626 | -4.205 | -4.239 | 100861502 | NA              | NR_046155_dup6_8_-1 |
| Gm23284       | -3.795 | -3.065 | -3.872 | -4.289 | -4.402 | -4.738 | -3.934 | -4.626 | -4.205 | -4.239 | 100861502 | NA              | NR_046155_dup7_8_-1 |
| Gm23284       | -3.795 | -3.065 | -3.872 | -4.289 | -4.402 | -4.738 | -3.934 | -4.626 | -4.205 | -4.239 | 100861502 | NA              | NR_046155_dup8_8_-1 |
| Gm23284       | -3.795 | -3.065 | -3.872 | -4.289 | -4.402 | -4.738 | -3.934 | -4.626 | -4.205 | -4.239 | 100861502 | NA              | NR_046155_dup9_8_-1 |
| Gm5086        | 7.072  | 6.771  | -0.693 | -0.675 | 5.282  | 5.726  | 4.670  | 4.566  | 2.281  | 3.543  | 328314    | NA              | NR_046157_13_+1     |
| Gm5091        | -3.563 | -1.446 | -4.981 | -4.981 | -4.981 | -4.981 | -4.981 | -4.981 | -4.981 | -4.981 | 328747    | NA              | NR_046164_17_-1     |
| Gm15850       | -3.936 | -4.981 | -4.980 | -4.980 | -4.641 | -4.936 | -4.296 | -4.932 | -4.981 | -4.981 | 329253    | NA              | NR_046167_1_-1      |
| Gm15850       | -3.376 | -4.981 | -4.980 | -4.980 | -4.525 | -4.809 | -4.052 | -4.921 | -4.981 | -4.981 | 329253    | NA              | NR_046168_1_-1      |
| C230024C17Rik | -4.981 | -4.981 | -4.959 | -4.959 | -4.959 | -4.343 | -4.981 | -4.981 | -4.981 | -4.981 | 329271    | NA              | NR_046171_1_-1      |
| 9130221F21Rik | -4.981 | -4.981 | -4.949 | -4.949 | -4.412 | -4.562 | -4.341 | -4.935 | -4.981 | -4.981 | 330350    | NA              | NR_046180_6_-1      |
| A630019I02Rik | 1.255  | 1.435  | -4.977 | -4.684 | -0.259 | -0.295 | -2.776 | -3.352 | -4.981 | -4.981 | 408254    | NA              | NR_046182_13_+1     |
| BC051537      | -3.529 | -4.981 | -4.232 | -2.998 | -3.088 | -4.219 | -3.659 | -4.486 | -4.981 | -4.981 | 414076    | NA              | NR_046183_17_-1     |
| 4930447K03Rik | 1.336  | 1.237  | -0.434 | -0.938 | 0.097  | 0.153  | -1.641 | -1.938 | -2.480 | -2.557 | 432745    | NA              | NR_046184_13_-1     |
| Bcas3os2      | -4.981 | -4.981 | -4.981 | -4.981 | -4.923 | -4.960 | -4.883 | -4.978 | -4.981 | -4.981 | 78420     | NA              | NR_046194_11_-1     |
| A930041C12Rik | -1.021 | -0.832 | -3.571 | -4.982 | -4.380 | -2.491 | -3.611 | -3.500 | -4.981 | -4.981 | 78443     | NA              | NR_046195_5_-1      |
| Gm16973       | 1.829  | 2.158  | 2.376  | 1.815  | 1.919  | 0.044  | 1.085  | 0.697  | 2.234  | 1.723  | 100503823 | NA              | NR_046209_14_-1     |
| Gm16973       | -0.370 | 1.141  | 0.528  | -0.310 | 1.174  | 1.132  | 0.341  | 0.396  | -2.120 | 0.704  | 100503823 | NA              | NR_046210_14_-1     |
| Rn45s         | 3.735  | 3.905  | 5.701  | 5.754  | 5.196  | 5.664  | 4.550  | 5.024  | 4.917  | 5.217  | 100861531 | NA              | NR_046233_17_+1     |
| 4930479D17Rik | -3.843 | -2.353 | -4.694 | -5.017 | -3.051 | -4.532 | -3.940 | -4.217 | -2.898 | -4.981 | 74925     | NA              | NR_046277_6_+1      |
| Zfp672        | 2.162  | 1.890  | 1.796  | 0.483  | 1.344  | 0.322  | 1.640  | -0.034 | 1.467  | -0.108 | 319475    | ZNF672          | NR_046280_11_-1     |
| 4930502E09Rik | -2.573 | -3.267 | -3.984 | -4.359 | -3.539 | -4.582 | -3.464 | -3.995 | -4.394 | -4.981 | 74995     | NA              | NR_046281_11_+1     |
| H2-T10        | 0.583  | -3.867 | -0.218 | -0.839 | -2.235 | -3.215 | -2.198 | -1.856 | 1.138  | 0.435  | 15024     | NA              | NR_046286_17_-1     |
| Tcp10a        | -4.981 | -4.981 | -4.944 | -4.957 | -4.974 | -4.972 | -4.981 | -4.981 | -4.931 | 21461  | NA        | NR_046291_17_+1 |                     |
| Map1lc3a      | -2.583 | -4.981 | -4.972 | -3.118 | -3.051 | -4.289 | -3.152 | -4.809 | -1.202 | -2.035 | 66734     | MAP1LC3A        | NR_046364_2_+1      |
| H2-Q5         | 1.708  | 0.724  | 1.782  | 1.277  | 1.972  | 1.154  | 1.445  | 1.031  | 1.508  | 0.533  | 15016     | NA              | NR_051981_17_+1     |
| Ankzf1        | 2.106  | 1.204  | 2.162  | 0.269  | 2.033  | 1.139  | 2.108  | 1.201  | 2.805  | 1.988  | 52231     | ANKZF1          | NR_051998_1_+1      |
| Ankzf1        | -0.512 | -1.365 | 0.775  | -1.499 | -0.004 | -0.406 | 0.029  | -0.357 | 0.372  | 0.366  | 52231     | ANKZF1          | NR_051999_1_+1      |
| Fuk           | -3.905 | -2.707 | -1.029 | -0.817 | -1.238 | -1.139 | -1.473 | -0.551 | 0.761  | 0.824  | 234730    | FUK             | NR_052009_8_-1      |
| Gpr19         | 0.771  | 0.714  | -0.449 | -1.093 | 0.373  | -0.904 | -0.781 | -0.381 | 0.385  | -0.769 | 14760     | GPR19           | NR_072990_6_-1      |
| 4930431F12Rik | -4.981 | -2.883 | -3.308 | -3.828 | -4.291 | -4.749 | -4.474 | -4.568 | -3.109 | -3.760 | 75783     | NA              | NR_073013_5_+1      |
| A930016O22Rik | -4.804 | -4.715 | -4.825 | -4.958 | -4.597 | -4.960 | -4.783 | -4.580 | -4.981 | -4.316 | 100503495 | NA              | NR_073014_7_-1      |
| A930016O22Rik | -1.515 | -3.267 | -3.445 | -4.599 | -4.400 | -4.881 | -3.883 | -4.561 | -4.981 | -4.981 | 100503495 | NA              | NR_073015_7_-1      |
| 4732471J01Rik | -0.915 | -1.416 | -1.258 | -1.470 | -0.918 | -0.504 | -1.016 | -1.695 | -1.101 | -1.705 | 654804    | NA              | NR_073027_7_+1      |
| 4732471J01Rik | -4.981 | -3.267 | -0.504 | -0.914 | -0.630 | -1.103 | -0.455 | -1.432 | -0.670 | -0.885 | 654804    | NA              | NR_073028_7_+1      |
| Ube2w         | 0.788  | 0.978  | 0.941  | 1.273  | 0.296  | 0.039  | 0.773  | -0.038 | -1.247 | 1.098  | 66799     | UBE2W           | NR_073122_1_-1      |
| Adck5         | 2.210  | 2.963  | 3.048  | 2.969  | 1.646  | 1.857  | 1.267  | 1.475  | 1.391  | 0.675  | 268822    | ADCK5           | NR_073123_15_+1     |
| Flcn          | 2.200  | -0.734 | 0.362  | -2.610 | 1.678  | -3.088 | 2.220  | -0.188 | 3.877  | 0.292  | 216805    | FLCN            | NR_073164_11_-1     |
| Milr1         | 3.429  | 4.040  | 1.226  | 1.197  | 2.612  | 2.685  | 2.611  | 2.763  | 2.916  | 3.050  | 380732    | NA              | NR_073165_11_+1     |
| Nol8          | 0.642  | -0.915 | -0.554 | -0.982 | 0.363  | -0.403 | -2.091 | -0.519 | 0.781  | -0.362 | 70930     | NOL8            | NR_073167_13_+1     |
| Nol8          | -0.324 | 0.670  | -0.699 | -0.641 | -0.344 | -1.149 | -0.776 | -1.113 | 0.159  | 0.804  | 70930     | NOL8            | NR_073168_13_+1     |
| Ager          | -3.296 | -4.981 | -1.468 | -1.389 | -1.406 | -2.115 | -3.115 | -3.059 | -0.617 | -1.517 | 11596     | AGER            | NR_073173_17_+1     |
| Ager          | -4.897 | -4.981 | -3.148 | -4.861 | -4.888 | -4.621 | -4.868 | -4.963 | -4.813 | -3.715 | 11596     | AGER            | NR_073175_17_+1     |
| Ager          | -4.880 | -4.981 | -4.819 | -4.978 | -4.970 | -4.976 | -4.864 | -4.969 | -4.958 | -4.858 | 11596     | AGER            | NR_073176_17_+1     |
| Fth1          | -1.734 | -1.277 | -1.641 | -2.526 | -0.326 | -0.776 | -0.442 | -2.318 | -0.617 | -0.770 | 14319     | FTH1            | NR_073181_19_+1     |
| Gabpb1        | -3.044 | -2.793 | -3.517 | -3.313 | -2.789 | -3.346 | -4.895 | -4.973 | -3.217 | -4.981 | 14391     | GABPB1          | NR_073183_2_-1      |
| Pglyrp2       | -1.099 | -1.557 | -4.737 | -1.572 | 1.167  | 1.422  | -1.281 | -4.187 | -4.954 | -3.246 | 57757     | PGLYRP2         | NR_073184_17_-1     |
| Gnb5          | -4.664 | -4.471 | -4.880 | -4.908 | -4.878 | -3.950 | -4.607 | -4.959 | -4.854 | -4.955 | 14697     | GNB5            | NR_073186_9_+1      |
| Chka          | 0.377  | -4.063 | 0.287  | 1.079  | 3.576  | 3.071  | 2.139  | 0.909  | -4.501 | -0.784 | 12660     | CHKA            | NR_073190_19_+1     |
| Il15ra        | -2.824 | -3.878 | -0.368 | -0.117 | -1.455 | -2.250 | -0.626 | -1.746 | 1.034  | -0.148 | 16169     | IL15RA          | NR_073191_2_+1      |
| Il15ra        | -4.341 | -4.063 | -2.701 | -3.034 | -2.124 | -2.145 | -1.015 | -3.099 | 0.036  | -0.290 | 16169     | IL15RA          | NR_073192_2_+1      |
| Crem          | -0.819 | -0.304 | -2.728 | -4.840 | -2.774 | -1.122 | -3.577 | -4.503 | -3.005 | -1.804 | 12916     | CREM            | NR_073193_18_-1     |
| Aire          | -4.981 | -4.981 | -3.459 | -4.880 | -4.834 | -4.901 | -4.932 | -4.931 | -4.981 | -4.981 | 11634     | AIRE            | NR_073358_10_-1     |
| 5830454E08Rik | 3.276  | 2.816  | 1.058  | 0.862  | 0.829  | 1.336  | 1.212  | 1.072  | 0.521  | 0.812  | 76100     | NA              | NR_073359_9_+1      |
| 4930453L07Rik | -4.981 | -4.981 | -4.981 | -4.981 | -1.741 | -4.015 | -4.457 | -4.968 | -4.981 | -4.981 | 74688     | NA              | NR_073360_8_+1      |
| 1700091H14Rik | -4.981 | -4.981 | -4.984 | -3.354 | -4.927 | 0.441  | -4.852 | -0.271 | -4.981 | 0.138  | 73553     | NA              | NR_073362_14_-1     |
| Phc1          | 0.941  | -0.458 | -3.263 | -4.787 | 1.348  | 1.664  | -3.214 | -4.615 | -0.614 | -0.304 | 13619     | PHC1            | NR_073364_6_-1      |
| Smim10l1      | -0.433 | 0.038  | -0.742 | -1.598 | -0.342 | -3.024 | -0.338 | -2.525 | -0.837 | -1.369 | 381820    | SMIM10L1        | NR_073368_6_+1      |
| Dnajc5        | 3.913  |        |        |        |        |        |        |        |        |        |           |                 |                     |

|               |        |        |        |        |        |        |        |        |        |        |           |          |                 |
|---------------|--------|--------|--------|--------|--------|--------|--------|--------|--------|--------|-----------|----------|-----------------|
| 4930451G09Rik | 0.285  | 0.007  | -1.558 | -1.620 | -0.317 | 0.531  | -0.905 | -0.521 | -1.971 | -1.191 | 74684     | NA       | NR_073370_16_+1 |
| 4930506C21Rik | -0.682 | 0.294  | -2.368 | -1.362 | -1.357 | -1.681 | -2.916 | -1.882 | -1.567 | -2.218 | 75060     | NA       | NR_073374_17_-1 |
| NcapH2        | 4.625  | 4.788  | 4.872  | 4.876  | 4.872  | 4.054  | 4.208  | 4.520  | 4.362  | 3.880  | 52683     | NCAHP2   | NR_073376_15_+1 |
| Runx2         | 3.195  | 0.636  | -1.879 | -1.995 | 0.738  | 0.609  | 1.114  | -1.677 | -4.052 | 0.730  | 12393     | RUNX2    | NR_073392_17_-1 |
| Surf1         | 5.084  | 4.791  | 2.970  | 2.650  | 3.242  | 3.300  | 2.950  | 2.980  | 3.102  | 3.042  | 20930     | SURF1    | NR_073420_2_-1  |
| Runx2         | 2.365  | 2.334  | -0.970 | -3.656 | -0.455 | -0.731 | -1.835 | -0.820 | -0.077 | -1.592 | 12393     | RUNX2    | NR_073425_17_-1 |
| Eci2          | 4.594  | 4.543  | 3.168  | 3.658  | 3.650  | 3.670  | 3.383  | 3.245  | 3.182  | 2.703  | 23986     | ECI2     | NR_073427_13_-1 |
| 4930577N17Rik | 1.844  | 1.811  | 2.566  | 2.531  | 0.854  | 0.644  | 1.068  | 1.048  | 1.780  | 2.049  | 67746     | NA       | NR_073429_3_+1  |
| 1600023N17Rik | -0.474 | -1.910 | -1.740 | -2.566 | -1.858 | -1.943 | -1.635 | -3.282 | -3.109 | -2.519 | 69788     | NA       | NR_073433_5_-1  |
| Crebzf        | 4.069  | 4.013  | 3.332  | 3.196  | 3.917  | 4.307  | 3.484  | 3.308  | 1.553  | 2.588  | 233490    | CREBZF   | NR_073436_7_+1  |
| Crebzf        | 0.122  | -0.958 | 0.034  | -1.564 | -0.027 | 0.843  | 0.033  | 0.308  | -1.254 | 0.241  | 233490    | CREBZF   | NR_073437_7_+1  |
| Crebzf        | 2.200  | 2.111  | 1.602  | 1.358  | 1.795  | 1.822  | 0.987  | 1.249  | 1.898  | 1.721  | 233490    | CREBZF   | NR_073438_7_+1  |
| Rchy1         | -1.196 | 0.150  | 0.044  | 0.567  | -2.154 | -0.684 | 0.823  | 1.272  | 1.863  | 1.049  | 68098     | RCHY1    | NR_073442_5_-1  |
| 5730488B01Rik | -4.981 | -4.981 | -2.095 | -2.087 | -4.056 | -1.225 | -1.391 | -0.367 | -3.109 | -4.316 | 70602     | NA       | NR_073462_4_+1  |
| Aqp9          | -4.694 | -4.981 | -4.533 | -4.810 | -4.770 | -1.566 | -2.039 | -4.893 | -1.278 | -4.911 | 64008     | AQP9     | NR_073483_9_-1  |
| Slfn10-ps     | -3.718 | -0.147 | -3.465 | -3.091 | -2.924 | -4.496 | -2.366 | -2.305 | -0.717 | -0.319 | 237887    | NA       | NR_073523_11_-1 |
| Slfn10-ps     | 0.783  | 0.625  | 0.729  | -1.210 | 0.715  | 0.829  | -0.242 | 1.081  | 0.860  | 0.347  | 237887    | NA       | NR_073524_11_-1 |
| Gm10364       | -3.426 | -3.157 | -4.135 | -3.008 | -4.525 | -3.689 | -3.554 | -3.369 | -1.998 | -3.266 | 100151693 | NA       | NR_073535_14_+1 |
| Sema6c        | -4.856 | -4.786 | -4.251 | -4.953 | -4.981 | -4.981 | -4.978 | -4.981 | -4.948 | -4.966 | 20360     | SEMA6C   | NR_073549_3_+1  |
| Sema6c        | -4.863 | -4.791 | -4.981 | -4.981 | -4.981 | -4.981 | -4.978 | -4.981 | -4.950 | -4.967 | 20360     | SEMA6C   | NR_073550_3_+1  |
| Sema6c        | -4.837 | -4.769 | -4.981 | -4.981 | -4.981 | -4.981 | -4.948 | -4.323 | -4.941 | -4.964 | 20360     | SEMA6C   | NR_073551_3_+1  |
| Stxbp3-ps     | -4.981 | -3.103 | -2.184 | -2.304 | -3.514 | -4.283 | -2.917 | -3.520 | -2.232 | -1.774 | 619371    | NA       | NR_073559_19_-1 |
| Numb          | -0.046 | 2.406  | 3.480  | 3.605  | 3.215  | 3.275  | 2.626  | 2.686  | 3.757  | 3.903  | 18222     | NUMB     | NR_073563_12_-1 |
| Numb          | -4.711 | -3.918 | -2.904 | -4.860 | -2.656 | -4.469 | -4.313 | -4.787 | -4.660 | -4.923 | 18222     | NUMB     | NR_073564_12_-1 |
| Abhd10        | 1.850  | 0.848  | 2.197  | -0.336 | 1.605  | -1.152 | 1.746  | 0.999  | 1.274  | -0.165 | 213012    | ABHD10   | NR_073572_16_-1 |
| Tysnd1        | 2.284  | 2.344  | 1.119  | 0.918  | 1.453  | 0.491  | 1.499  | 0.301  | -0.300 | 1.063  | 71767     | TYSND1   | NR_073587_10_+1 |
| Gpr19         | -4.672 | -1.696 | -4.797 | -4.443 | -4.854 | -3.734 | -4.712 | -1.544 | -4.789 | -2.671 | 14760     | GPR19    | NR_074084_6_-1  |
| Brat1         | 1.620  | 1.817  | -1.247 | -0.726 | 1.067  | 0.052  | 0.057  | 1.780  | -3.806 | 1.289  | 231841    | BRAT1    | NR_074085_5_+1  |
| Aes           | 0.848  | 1.072  | 0.560  | 0.230  | 0.840  | -0.141 | 0.472  | -0.100 | 0.958  | 0.398  | 14797     | AES      | NR_074087_10_+1 |
| Wwp1          | 2.784  | 2.973  | 0.063  | -0.567 | -0.167 | -0.303 | 1.638  | -0.569 | -4.020 | 0.666  | 107568    | WWP1     | NR_074089_4_-1  |
| Wwp1          | -0.591 | 2.181  | -0.302 | -0.583 | 0.067  | 0.320  | 1.254  | 0.660  | 0.866  | 1.846  | 107568    | WWP1     | NR_074090_4_-1  |
| Dnm1l         | -4.119 | -0.145 | 0.426  | 0.584  | -0.030 | 0.285  | 0.222  | 0.174  | 1.579  | 1.159  | 74006     | DNM1L    | NR_075104_7_-1  |
| Pitpnm1       | 3.555  | 3.403  | 6.217  | 6.245  | 5.314  | 5.278  | 6.450  | 6.368  | 7.769  | 7.553  | 18739     | PITPNM1  | NR_075078_19_+1 |
| Ippk          | -4.802 | -4.371 | -2.237 | -4.791 | -4.865 | -4.936 | -4.312 | -2.783 | -4.661 | -4.768 | 75678     | IPPK     | NR_075085_13_+1 |
| Nup88         | 1.047  | 1.979  | 1.305  | 2.250  | 1.000  | 2.171  | -0.225 | 1.406  | -0.510 | -0.017 | 19069     | NUP88    | NR_075087_11_-1 |
| Cenpk         | 1.047  | 1.043  | 1.226  | 1.577  | 2.018  | 1.497  | 1.687  | 1.296  | -0.024 | 0.300  | 60411     | CENPK    | NR_075088_13_+1 |
| Slc25a43      | -3.281 | -4.592 | -3.693 | -4.955 | -4.488 | -4.963 | -4.958 | -4.978 | -4.869 | -4.965 | 194744    | SLC25A43 | NR_075096_X_+1  |
| Slc25a43      | -3.107 | -1.866 | -2.103 | -3.346 | -2.820 | -3.476 | -1.887 | -2.535 | -0.056 | -0.286 | 194744    | SLC25A43 | NR_075097_X_+1  |
| Etfb          | -0.892 | -1.400 | -1.203 | -2.253 | -1.986 | -3.009 | -2.406 | -2.539 | -1.435 | -4.952 | 110826    | ETFB     | NR_075104_7_+1  |
| Gm6756        | -4.981 | -0.829 | -4.938 | -3.950 | -4.969 | -3.744 | -4.964 | -3.258 | -4.981 | -4.974 | 627427    | NA       | NR_076393_18_+1 |
| 2310002F09Rik | -4.981 | -4.981 | -4.981 | -4.981 | -4.893 | -4.464 | -4.260 | -4.442 | -4.981 | -4.981 | 100504720 | NA       | NR_077063_7_-1  |
| C030013G03Rik | -1.041 | -0.755 | -4.973 | -4.973 | -4.981 | -4.981 | -4.734 | -4.929 | -4.761 | -4.981 | 77414     | NA       | NR_077216_17_+1 |
| C030013G03Rik | 4.532  | 4.353  | -4.906 | -3.787 | -4.966 | -4.835 | -4.081 | -2.027 | -4.492 | -4.981 | 77414     | NA       | NR_077217_17_+1 |
| A930006K02Rik | 3.801  | 3.393  | 1.711  | 1.376  | 1.294  | 1.235  | 1.687  | 1.471  | 0.306  | 0.240  | 100503120 | NA       | NR_077219_16_+1 |
| Gm6297        | -0.820 | -0.827 | -3.380 | -2.475 | -2.155 | -2.069 | -2.260 | -3.571 | -4.735 | -2.738 | 622208    | NA       | NR_077221_4_-1  |
| 9330102E08Rik | -4.981 | -1.569 | -4.981 | -4.981 | -4.467 | -4.948 | -4.981 | -4.981 | -4.981 | -4.981 | 330427    | NA       | NR_077223_6_-1  |
| Gm6297        | -2.014 | -1.201 | -0.153 | -0.665 | 0.526  | -0.085 | -0.299 | -1.774 | -1.824 | -1.182 | 622208    | NA       | NR_077226_4_-1  |
| 8430426J06Rik | -4.981 | -4.981 | -4.382 | -4.957 | -4.981 | -4.981 | -4.981 | -4.981 | -4.981 | -4.981 | 78102     | NA       | NR_077229_15_-1 |
| 8430426J06Rik | -1.803 | -4.785 | -4.981 | -4.981 | -4.981 | -4.981 | -4.981 | -4.981 | -4.981 | -4.981 | 78102     | NA       | NR_077230_15_-1 |
| 8430426J06Rik | -3.279 | -1.842 | -4.961 | -4.980 | -4.980 | -4.969 | -4.981 | -4.981 | -4.981 | -4.981 | 78102     | NA       | NR_077231_15_-1 |
| C230037L18Rik | 0.087  | 0.528  | -0.962 | -1.445 | -0.702 | -1.527 | -1.210 | -1.125 | -1.962 | -1.500 | 100532730 | NA       | NR_077233_15_+1 |
| Tubgcp4       | 2.463  | 1.903  | 2.387  | 2.924  | 2.647  | 2.628  | 1.307  | 2.539  | 1.935  | 2.415  | 51885     | TUBGCP4  | NR_077245_2_+1  |
| Gm21284       | -4.981 | -2.787 | -3.690 | -2.201 | -3.322 | -4.150 | -3.123 | -4.210 | -3.603 | -4.981 | 100861870 | NA       | NR_078345_6_+1  |
| AI839979      | -2.388 | -1.953 | -0.993 | -1.666 | -2.717 | -1.101 | 2.282  | 3.275  | 6.705  | 6.712  | 100740    | NA       | NR_102275_5_-1  |
| AI314278      | -3.843 | -4.981 | -4.627 | -4.618 | -4.980 | -4.980 | -4.956 | -4.969 | -4.185 | -4.981 | 101521    | NA       | NR_102276_7_+1  |
| Cops5         | 2.492  | 3.691  | 1.729  | 1.872  | 2.157  | 1.861  | 1.173  | 1.848  | 1.791  | 1.632  | 26754     | COP55    | NR_102282_1_-1  |
| 5830444B04Rik | 0.136  | -2.301 | -1.358 | -4.379 | -1.871 | -3.709 | -1.266 | -4.172 | -1.503 | -3.300 | 641454    | NA       | NR_102283_4_-1  |
| 5830444B04Rik | -1.499 | -4.981 | -3.024 | -4.976 | -3.712 | -4.987 | -3.446 | -4.962 | -2.064 | -4.981 | 641454    | NA       | NR_102284_4_-1  |
| 4833411C07Rik | -2.739 | -4.981 | -2.585 | -1.891 | 0.221  | 1.035  | 0.229  | 0.286  | -2.086 | -3.449 | 71624     | NA       | NR_102285_8_+1  |
| 5830444B04Rik | 1.204  | -4.981 | -0.240 | -4.927 | -1.549 | -4.961 | -1.100 | -4.959 | -1.124 | -4.981 | 641454    | NA       | NR_102287_4_-1  |
| Man2c1os      | 2.059  | 0.643  | 0.742  | -0.398 | 0.197  | 0.107  | 0.987  | 0.881  | 1.179  | 0.654  | 76794     | NA       | NR_102289_9_-1  |
| A630023P12Rik | -3.563 | -4.981 | -4.769 | -3.274 | -3.852 | -2.994 | -4.070 | -0.623 | -4.981 | -3.853 | 231603    | NA       | NR_102290_5_+1  |
| Rpl22         | -2.545 | -3.395 | -3.219 | -2.553 | -3.329 | -4.848 | -2.712 | -2.306 | -1.669 | -2.858 | 19934     | RPL22    | NR_102291_4_+1  |
| Rpl22         | -2.511 | -3.051 | -4.938 | -3.721 | -4.981 | -4.769 | -4.978 | -4.552 | -4.981 | -3.363 | 19934     | RPL22    | NR_102292_4_+1  |
| Gm29811       | -4.981 | -3.752 | -4.710 | -4.342 | -4.011 | -4.806 | -4.763 | -4.521 | -2.901 | -3.828 | 101243624 | NA       | NR_102297_3_-1  |
| Gm29811       | -4.981 | -3.673 | -4.680 | -4.115 | -3.705 | -4.728 | -4.717 | -4.292 | -2.399 | -3.352 | 101243624 | NA       | NR_102298_3_-1  |
| D630024D03Rik | -1.104 | -4.108 | -4.221 | -4.952 | -4.981 | -4.981 | -4.981 | -4.981 | -4.981 | -4.981 | 414116    | NA       | NR_102310_11_-1 |
| D630024D03Rik | -1.355 | 0.123  | -4.981 | -4.981 | -4.981 | -4.981 | -4.947 | -4.964 | -4.981 | -4.981 | 414116    | NA       | NR_102311_11_-1 |
| Stap2         | -0.513 | -4.238 | 3.481  | 4.295  | 3.619  | 3.874  | 2.420  | 2.351  | -4.869 | -3.386 | 106766    | STAP2    | NR_102313_17_-1 |
| 6030443J06Rik | -3.028 | -3.267 | -3.528 | -3.637 | -2.928 | -3.270 | -3.707 | -3.091 | -4.981 | -2.057 | 320719    | NA       | NR_102315_5_+1  |
| 9330162012Rik | -4.981 | -3.315 | -4.060 | -4.154 | -4.003 | -3.053 | -4.975 | -3.934 | -4.190 | -2.605 | 493800    | NA       | NR_102323_13_+1 |
| Gm4432        | -0.098 | 0.301  | -0.272 | -1.722 | 0.109  | -0.200 | -0.382 | -1.200 | -0.483 | 0.281  | 100043434 | NA       | NR_102329_17_+1 |
| Szrd1         | 3.261  | 3.505  | 3.605  | 4.207  | 3.553  | 3.504  | 3.648  | 3.973  | 4.399  | 4.333  | 213491    | SZRD1    | NR_102343_4_-1  |
| Szrd1         | 0.457  | 2.026  | 1.962  | 1.404  | 2.032  | 0.459  | 1.216  | 1.517  | 1.986  | 2.801  | 213491    | SZRD1    | NR_102344_4_-1  |

|               |        |        |        |        |        |        |        |        |        |        |           |          |                 |
|---------------|--------|--------|--------|--------|--------|--------|--------|--------|--------|--------|-----------|----------|-----------------|
| Zbtb24        | 0.138  | -0.879 | 1.332  | -0.524 | 1.002  | 0.724  | -0.070 | -1.210 | 0.398  | -4.477 | 268294    | ZBTB24   | NR_102360_10_+1 |
| AW112010      | 6.489  | 4.927  | 8.644  | 8.754  | 7.434  | 7.704  | 8.361  | 8.255  | 4.950  | 5.189  | 107350    | NA       | NR_102366_19_-1 |
| 9630001P10Rik | -4.981 | -4.981 | -3.941 | -4.144 | -4.973 | -3.609 | -4.971 | -4.805 | -4.981 | -4.981 | 319251    | NA       | NR_102378_5_+1  |
| Adam17        | 1.427  | 1.342  | 1.304  | 1.756  | 0.723  | 0.467  | 0.204  | 0.853  | 1.439  | 1.971  | 11491     | ADAM17   | NR_102380_12_-1 |
| Fanc1         | 0.762  | -0.517 | 2.057  | -1.910 | 1.737  | -2.552 | 1.594  | -3.626 | 0.479  | -3.016 | 67030     | FANCL    | NR_102382_11_+1 |
| 5930430L01Rik | -1.156 | 0.883  | -4.915 | -1.946 | -4.951 | -3.197 | -4.479 | -0.908 | -4.808 | -4.960 | 319982    | NA       | NR_102383_5_-1  |
| 5930430L01Rik | -0.303 | -4.981 | -3.909 | -4.966 | -3.906 | -4.296 | -4.647 | -4.028 | -2.809 | -2.867 | 319982    | NA       | NR_102384_5_-1  |
| Ank1          | -2.438 | -4.981 | -3.459 | -3.517 | -3.248 | -4.911 | -3.888 | -2.629 | -3.293 | -3.040 | 11733     | ANK1     | NR_102385_8_+1  |
| Ank1          | -4.981 | -4.343 | -4.970 | -4.905 | -4.857 | -4.358 | -4.979 | -4.937 | -4.978 | -4.740 | 11733     | ANK1     | NR_102386_8_+1  |
| C130046K22Rik | -1.647 | -1.663 | -4.429 | -3.659 | -3.387 | -2.577 | -4.598 | -3.249 | -3.547 | -0.033 | 399609    | NA       | NR_102388_11_+1 |
| C130046K22Rik | -1.946 | -0.962 | -3.926 | -3.034 | -2.943 | -2.739 | -3.119 | -2.413 | -1.204 | -1.534 | 399609    | NA       | NR_102389_11_+1 |
| Mea1          | 4.694  | 4.569  | 4.036  | 4.006  | 3.617  | 3.635  | 4.129  | 4.068  | 3.236  | 3.552  | 17256     | MEA1     | NR_102392_17_+1 |
| Gm12992       | -1.973 | -1.247 | -0.336 | -0.697 | -0.450 | -1.053 | -0.302 | -1.688 | 0.497  | -0.032 | 545681    | NA       | NR_102393_4_-1  |
| Gm12992       | -4.981 | -4.981 | -3.390 | -4.824 | -4.821 | -4.708 | -4.973 | -3.665 | -2.230 | -3.209 | 545681    | NA       | NR_102394_4_-1  |
| C130046K22Rik | -0.101 | 0.533  | -0.556 | -0.622 | 0.889  | -0.352 | -0.407 | -0.352 | 0.276  | 0.414  | 399609    | NA       | NR_102396_11_+1 |
| Adam28        | -3.509 | -3.429 | -3.472 | -3.752 | -4.022 | -2.845 | -3.982 | -3.111 | -3.836 | -4.171 | 13522     | ADAM28   | NR_102399_14_-1 |
| AA413626      | -3.563 | -1.755 | -2.241 | -3.799 | -3.530 | -3.688 | -3.012 | -4.716 | -2.352 | -3.816 | 100359413 | NA       | NR_102683_11_+1 |
| Gm6815        | -4.981 | -4.981 | -4.548 | -4.537 | -4.402 | -4.700 | -4.945 | -4.806 | -4.012 | -4.981 | 627962    | NA       | NR_102685_16_-1 |
| Mphosph9      | 0.130  | 0.689  | 0.936  | 0.842  | 1.492  | 1.251  | 1.255  | 0.211  | 0.671  | 1.059  | 269702    | MPHOSPH9 | NR_102690_5_-1  |
| Gm6083        | -4.981 | -4.981 | -4.981 | -4.981 | -0.115 | 0.249  | -2.877 | -4.473 | -4.981 | -4.981 | 619355    | NA       | NR_102704_5_+1  |
| 6030469F06Rik | -4.981 | -4.981 | -4.981 | -4.981 | -4.981 | -4.981 | -4.180 | -4.772 | -4.981 | -4.981 | 100043065 | NA       | NR_102715_12_+1 |
| Ppp2r3d       | -0.336 | -0.053 | -0.862 | -1.040 | -1.169 | -1.740 | -0.832 | -0.953 | -0.669 | -0.394 | 19054     | NA       | NR_102716_9_-1  |
| Rad51d        | -1.339 | 0.010  | -1.371 | -1.405 | -1.461 | -1.482 | -3.833 | -3.328 | -4.454 | -4.558 | 19364     | RAD51D   | NR_102717_11_-1 |
| Rad51d        | 1.270  | -3.714 | -2.083 | -0.642 | -0.343 | -0.822 | -0.429 | -1.487 | -0.848 | -4.398 | 19364     | RAD51D   | NR_102718_11_-1 |
| Rad51d        | -1.084 | 0.012  | -2.404 | -2.440 | -0.746 | -0.220 | -1.599 | -4.892 | -3.972 | -1.450 | 19364     | RAD51D   | NR_102719_11_-1 |
| Rad51d        | -4.482 | -4.353 | -4.623 | -4.857 | -4.858 | -4.963 | -4.737 | -4.961 | -4.687 | -4.652 | 19364     | RAD51D   | NR_102720_11_-1 |
| 4930526115Rik | -4.981 | -2.239 | -3.650 | -3.810 | -4.962 | -3.603 | -3.519 | -4.698 | -2.911 | -4.981 | 75135     | NA       | NR_102721_9_+1  |
| Cd22          | -4.160 | -3.946 | -2.857 | -2.800 | 0.850  | 0.273  | -1.077 | -0.198 | -4.741 | -4.941 | 12483     | CD22     | NR_102722_7_-1  |
| Cd22          | -1.120 | -2.315 | 0.992  | 0.247  | 3.559  | 3.372  | 2.552  | 2.908  | -0.281 | -1.866 | 12483     | CD22     | NR_102723_7_-1  |
| Flt3l         | -0.540 | 0.417  | -0.283 | -1.618 | -0.321 | -0.252 | -0.893 | -0.485 | -2.177 | -0.134 | 14256     | FLT3LG   | NR_102725_7_-1  |
| Ly9           | 4.116  | 3.713  | 2.614  | 3.402  | 4.382  | 3.821  | 3.145  | 2.798  | 3.212  | 2.007  | 17085     | LY9      | NR_102726_1_-1  |
| Ldha          | -0.381 | 0.646  | 1.099  | 1.077  | 0.017  | 0.025  | 0.036  | -0.298 | -0.075 | -0.647 | 16828     | LDHA     | NR_102727_7_+1  |
| Snap91        | -4.981 | -4.981 | -4.981 | -4.981 | -4.981 | -4.981 | -4.981 | -4.981 | -4.981 | -4.981 | 20616     | SNAP91   | NR_102729_9_-1  |
| Meis3         | -4.119 | -4.121 | -3.091 | -3.391 | -2.795 | -4.925 | -4.312 | -3.322 | -4.977 | -4.450 | 17537     | MEIS3    | NR_102730_7_+1  |
| Stk16         | 3.269  | 3.092  | 2.317  | 2.183  | 2.656  | 2.935  | 3.077  | 1.522  | 3.368  | 2.591  | 20872     | STK16    | NR_102731_1_+1  |
| Farsb         | 0.337  | 0.593  | 0.129  | 0.008  | 0.237  | 0.624  | -1.557 | -1.759 | -0.586 | -1.368 | 23874     | FARSB    | NR_102757_1_-1  |
| Farsb         | -0.439 | -1.216 | -0.388 | 0.810  | 0.179  | -1.991 | -1.423 | -0.777 | -0.010 | -4.070 | 23874     | FARSB    | NR_102758_1_-1  |
| Hspa14        | 0.907  | 1.354  | 1.711  | 2.590  | 1.915  | 1.814  | 1.673  | 1.489  | 2.161  | 1.263  | 50497     | HSPA14   | NR_103465_2_-1  |
| Dmc1          | -2.483 | -4.981 | -4.945 | -4.945 | -3.507 | -3.333 | -3.928 | -4.450 | -3.773 | -4.981 | 13404     | DMC1     | NR_103477_15_-1 |
| Gm26705       | -4.981 | -3.408 | -4.653 | -4.217 | -4.355 | -4.151 | -3.790 | -4.647 | -3.738 | -4.227 | 381967    | NA       | NR_103487_7_-1  |
| Gm44504       | -2.160 | -1.915 | -2.972 | -1.994 | -1.989 | -2.307 | -3.195 | -2.580 | -2.723 | -3.959 | 100169864 | UBL4A    | NR_103489_X_-1  |
| Gm38426       | -0.618 | 1.112  | 2.066  | 2.355  | 0.798  | 2.506  | -0.936 | 1.498  | -2.827 | -3.185 | 100503676 | NA       | NR_103491_8_+1  |
| Gm15694       | -0.980 | -0.737 | -1.241 | -1.226 | -0.496 | -1.002 | -0.092 | -2.725 | -1.965 | -1.691 | 101669761 | NA       | NR_103513_16_-1 |
| Ndufa7        | 0.438  | 0.543  | -0.620 | -0.868 | -0.978 | -1.615 | 0.293  | -0.559 | 0.168  | -0.430 | 66416     | NDUFA7   | NR_103514_17_+1 |
| Ndufa7        | 5.146  | 4.639  | 4.797  | 4.505  | 4.049  | 3.986  | 4.426  | 4.335  | 3.739  | 3.535  | 66416     | NDUFA7   | NR_103515_17_+1 |
| Ndufa7        | 3.926  | 4.186  | 3.544  | 2.911  | 3.021  | 2.889  | 3.349  | 3.199  | 2.822  | 2.962  | 66416     | NDUFA7   | NR_103516_17_+1 |
| 5430425K12Rik | 0.658  | 0.810  | -3.351 | -3.591 | -2.691 | -3.217 | -1.629 | -2.694 | -0.462 | -2.285 | 71416     | NA       | NR_103550_13_+1 |
| Tti2          | 1.725  | 3.707  | 0.724  | 2.253  | 0.823  | 2.697  | 0.817  | 2.065  | 0.509  | 2.434  | 234138    | TTI2     | NR_103719_8_+1  |
| Dgkh          | -4.981 | -4.981 | -2.102 | -3.860 | -4.965 | -4.969 | -3.669 | -3.051 | -0.751 | -2.458 | 380921    | DGKH     | NR_104044_14_-1 |
| Gria3         | -2.526 | 0.357  | -2.690 | -4.520 | -1.251 | -4.892 | -3.733 | -2.134 | -1.300 | -4.422 | 53623     | GRIA3    | NR_104053_X_+1  |
| Pcsk7         | 1.196  | 1.059  | 1.047  | 1.396  | 0.847  | 0.447  | 0.012  | 0.576  | 3.215  | 2.515  | 18554     | PCSK7    | NR_104055_9_+1  |
| Vasp          | 4.593  | 4.596  | 5.448  | 5.582  | 6.277  | 6.413  | 6.152  | 5.448  | 4.602  | 4.741  | 22323     | VASP     | NR_104069_7_-1  |
| Ptpn22        | -0.664 | -3.742 | 3.259  | 1.779  | 3.354  | 2.097  | 2.602  | 1.681  | 3.052  | 2.028  | 19260     | PTPN22   | NR_104070_3_+1  |
| Gtf2a2        | 1.950  | 2.293  | 1.885  | 1.528  | 1.784  | 1.930  | 1.735  | 1.522  | 0.557  | 0.681  | 235459    | GTF2A2   | NR_104093_9_+1  |
| Slc10a7       | -4.981 | -4.863 | -1.948 | -2.870 | -1.642 | -2.484 | -3.837 | -1.825 | -4.777 | -1.886 | 76775     | SLC10A7  | NR_104094_8_+1  |
| Klra14-ps     | -3.572 | -4.981 | -4.483 | -4.985 | -4.981 | -4.981 | -4.429 | -4.823 | -3.872 | -4.981 | 654449    | NA       | NR_104105_6_-1  |
| Klra14-ps     | -2.816 | -4.981 | -3.243 | -4.977 | -4.981 | -4.981 | -3.638 | -4.676 | -2.991 | -4.981 | 654449    | NA       | NR_104106_6_-1  |
| Tmevpg1       | -4.981 | -2.353 | -4.841 | -3.908 | -4.923 | -3.882 | -4.842 | -4.679 | -2.871 | -4.981 | 103214    | NA       | NR_104123_10_-1 |
| Dffa          | -2.495 | 0.252  | -4.528 | -4.298 | -4.661 | -4.758 | -3.944 | -4.864 | -4.667 | -4.922 | 13347     | DFFA     | NR_104263_4_+1  |
| Pdlim7        | -4.926 | -4.981 | -3.358 | -1.891 | -4.864 | -4.950 | -4.355 | -3.717 | -4.981 | -4.759 | 67399     | PDLIM7   | NR_104287_13_-1 |
| Rnf41         | -1.992 | 1.467  | 0.633  | 0.470  | 0.642  | 0.323  | -2.311 | -0.940 | -0.303 | 0.935  | 67588     | RNF41    | NR_104288_10_+1 |
| Rnf41         | 0.613  | -2.228 | 0.385  | -0.371 | 0.965  | 1.050  | 0.800  | 0.285  | -0.421 | 0.775  | 67588     | RNF41    | NR_104289_10_+1 |
| Rnf41         | -1.584 | -4.981 | -1.190 | -2.101 | -2.182 | -1.427 | -2.749 | -2.496 | -1.064 | -1.144 | 67588     | RNF41    | NR_104290_10_+1 |
| Gnl3          | 3.196  | 3.837  | 1.743  | 2.182  | 2.066  | 2.039  | 2.715  | 2.347  | -0.194 | -0.817 | 30877     | GNL3     | NR_104298_14_-1 |
| Dph3          | -2.780 | -0.221 | -1.594 | -2.468 | -2.876 | -2.295 | -1.939 | -2.993 | -3.047 | -2.099 | 105638    | DPH3     | NR_104303_14_-1 |
| Dph3          | 4.150  | 3.482  | 2.507  | 2.501  | 2.669  | 2.932  | 2.698  | 2.368  | 2.783  | 2.036  | 105638    | DPH3     | NR_104304_14_-1 |
| Dph3          | 3.204  | 2.765  | 2.260  | 1.633  | 1.682  | 1.891  | 1.403  | 1.633  | 1.325  | 1.851  | 105638    | DPH3     | NR_104305_14_-1 |
| Nprl3         | 1.319  | 1.138  | -0.657 | -2.424 | -2.004 | -1.285 | -0.590 | -2.068 | -0.301 | -0.673 | 17168     | NPRL3    | NR_104306_11_-1 |
| Akap1         | -3.931 | -2.910 | -4.320 | -4.717 | -4.555 | -4.882 | -4.194 | -3.526 | -4.403 | -4.902 | 11640     | AKAP1    | NR_104310_11_-1 |
| Dhx15         | 2.575  | 3.095  | 1.765  | 1.101  | 2.247  | 2.423  | 2.807  | 0.538  | 2.487  | 1.391  | 13204     | DHX15    | NR_104311_5_-1  |
| Smagp         | -4.981 | -4.981 | -0.645 | 0.212  | -1.124 | 0.239  | -2.193 | -0.720 | -2.712 | -2.320 | 207818    | SMAGP    | NR_104337_15_-1 |
| Smagp         | -4.981 | -4.981 | -1.699 | -1.189 | -4.731 | -2.978 | -4.816 | -2.874 | -4.721 | -2.052 | 207818    | SMAGP    | NR_104338_15_-1 |
| Adamts15      | -4.981 | -4.846 | -4.950 | -4.947 | -4.617 | -4.550 | -4.975 | -3.878 | -4.981 | -4.981 | 66548     | ADAMTS15 | NR_104339_10_-1 |
| Adamts15      | -4.981 | -4.844 | -4.961 | -4.957 | -4.968 | -4.513 | -3.745 | -4.575 | -4.981 | -4.981 | 66548     | ADAMTS15 | NR_104340_10_-1 |

|                |        |        |        |        |        |        |        |        |        |        |               |           |                  |
|----------------|--------|--------|--------|--------|--------|--------|--------|--------|--------|--------|---------------|-----------|------------------|
| Gdap2          | 1.102  | 3.233  | 2.830  | 3.229  | 1.718  | 2.424  | 1.800  | 2.634  | 2.680  | 3.068  | 14547         | GDAP2     | NR_104341_3_+_1  |
| Gfra1          | -4.755 | -4.981 | -4.972 | -4.979 | -4.981 | -4.981 | -4.981 | -4.981 | -4.981 | -4.981 | 14585         | GFRA1     | NR_104342_19_-_1 |
| Carf           | 1.293  | 1.078  | -1.963 | -0.234 | -2.093 | -2.046 | -0.343 | -2.127 | -1.830 | -1.022 | 241066        | CARF      | NR_104344_1_+_1  |
| Gnb1l          | -4.827 | -1.015 | -4.852 | -4.949 | -2.225 | -2.687 | -3.810 | -4.948 | -4.789 | -4.935 | 13972         | GNB1L     | NR_104347_16_+_1 |
| Gm28042        | -0.093 | 1.329  | 0.552  | 1.442  | 1.387  | 1.494  | 0.845  | 1.786  | 0.763  | 0.751  | 102238433     | NA        | NR_104353_2_+_1  |
| Chchd7         | -0.186 | 0.411  | -1.508 | -2.060 | -3.204 | -2.791 | -1.268 | -2.591 | -1.534 | -2.077 | 66433         | CHCHD7    | NR_104354_4_+_1  |
| Chchd7         | 0.037  | -0.470 | -3.708 | -2.957 | -3.974 | -4.119 | -3.413 | -4.517 | -2.476 | -2.154 | 66433         | CHCHD7    | NR_104355_4_+_1  |
| Chchd7         | -3.400 | -4.981 | -4.976 | -4.976 | -4.744 | -4.925 | -3.031 | -4.942 | -3.271 | -4.981 | 66433         | CHCHD7    | NR_104356_4_+_1  |
| Exosc5         | 2.438  | 2.835  | 2.260  | 2.180  | 2.841  | 3.213  | 2.520  | 2.201  | 2.067  | 2.115  | 27998         | EXOSC5    | NR_104358_7_+_1  |
| Osgepl1        | 1.734  | 2.179  | -0.352 | 0.467  | 1.606  | 1.651  | 0.425  | 0.846  | -0.342 | 0.665  | 72085         | OSGEPL1   | NR_104360_1_+_1  |
| Osgepl1        | -2.422 | -4.761 | -3.557 | -1.973 | -4.937 | -2.635 | -3.378 | -4.972 | -4.689 | -4.929 | 72085         | OSGEPL1   | NR_104361_1_+_1  |
| Zmym6          | 1.569  | 2.303  | 1.163  | 0.667  | 2.283  | 2.074  | 1.957  | 1.510  | 1.100  | 0.913  | 100177        | ZMYM6     | NR_104366_4_+_1  |
| Fbxo44         | -1.175 | -1.357 | -1.109 | -3.057 | -2.104 | -3.652 | -2.060 | -4.180 | -4.877 | -2.952 | 230903        | FBXO44    | NR_104374_4_-_1  |
| Fbxo44         | -0.066 | -4.589 | -3.117 | -2.500 | -1.830 | -3.101 | -3.926 | -4.288 | -2.589 | -4.829 | 230903        | FBXO44    | NR_104375_4_-_1  |
| 1700024P16Rik  | 1.025  | -0.763 | -4.973 | -4.868 | -4.980 | -4.959 | -4.936 | -3.964 | -4.981 | -4.848 | 242594        | C1orf168  | NR_104376_4_+_1  |
| Fbxl4          | 3.399  | 2.504  | 1.290  | 0.651  | 1.366  | 1.520  | 2.072  | 0.323  | 2.171  | 2.162  | 269514        | FBXL4     | NR_104378_4_+_1  |
| Fbxl4          | -2.261 | 1.110  | 0.055  | -2.650 | -0.927 | -2.171 | -1.133 | -1.467 | 1.071  | -0.043 | 269514        | FBXL4     | NR_104379_4_+_1  |
| Fbxl4          | 1.593  | 0.947  | 1.717  | 0.048  | 1.203  | 1.297  | 1.585  | 0.396  | 1.956  | 1.780  | 269514        | FBXL4     | NR_104380_4_+_1  |
| Plekhhg5       | 1.224  | 1.436  | 2.657  | 2.103  | 3.563  | 3.203  | 2.128  | 1.278  | 0.002  | 0.533  | 269608        | PLEKHG5   | NR_104381_4_+_1  |
| Ncf1           | 0.091  | 0.501  | -1.799 | -2.583 | -1.768 | -1.992 | -4.200 | -2.627 | -2.217 | -4.981 | 17969         | NCF1      | NR_104383_5_-_1  |
| Dab1           | -3.668 | -4.981 | -3.715 | -4.698 | -4.838 | -4.912 | -4.966 | -4.974 | -4.981 | -4.981 | 13131         | DAB1      | NR_104385_4_+_1  |
| Nin            | -4.626 | -4.177 | -4.704 | -4.689 | -4.930 | -4.971 | -4.815 | -4.305 | -4.183 | -4.609 | 18080         | NIN       | NR_104397_12_-_1 |
| Nin            | 0.939  | 1.105  | -1.799 | -2.019 | 0.221  | 0.046  | 0.422  | -0.094 | 1.153  | 1.094  | 18080         | NIN       | NR_104398_12_-_1 |
| Terf2          | -4.730 | -4.191 | -2.338 | -1.299 | -4.625 | -2.061 | -1.595 | -1.025 | -4.978 | -2.475 | 21750         | TERF2     | NR_104410_8_-_1  |
| Fuom           | -2.737 | -2.550 | -4.885 | -3.923 | -2.981 | -2.134 | -3.855 | -1.882 | 0.036  | -1.084 | 69064         | FUOM      | NR_104415_7_-_1  |
| 1810009A15Rik  | 1.134  | 1.126  | 1.443  | 1.003  | 1.614  | 1.575  | 1.185  | 0.582  | 0.095  | -0.183 | 66276         | C11orf98  | NR_104416_19_+_1 |
| Hnrnpa1        | 4.965  | 4.745  | 4.598  | 4.549  | 4.196  | 4.199  | 4.203  | 4.072  | 3.301  | 2.959  | 15382         | NA        | NR_104427_15_+_1 |
| Cd209b         | -4.981 | -4.981 | -4.315 | -4.952 | -3.232 | -4.072 | -3.174 | -0.740 | -4.981 | -3.122 | 69165         | NA        | NR_104430_8_-_1  |
| Cklf           | 0.745  | 1.373  | -0.224 | 0.015  | 1.116  | 1.453  | 1.064  | 0.448  | -0.165 | -0.647 | 75458         | CKLF      | NR_104433_8_+_1  |
| Nr2c2ap        | 4.816  | 4.545  | 3.170  | 2.885  | 3.903  | 3.465  | 2.834  | 2.302  | 1.859  | 1.401  | 75692         | NR2C2AP   | NR_104434_8_+_1  |
| Clmn           | -4.981 | -3.749 | -4.801 | -4.512 | -4.437 | -4.477 | -4.337 | -4.574 | -3.682 | -4.399 | 94040         | CLMN      | NR_104435_12_-_1 |
| Clmn           | -4.981 | -3.200 | -4.750 | -4.415 | -4.345 | -4.582 | -4.250 | -4.399 | -3.555 | -4.486 | 94040         | CLMN      | NR_104436_12_-_1 |
| Clmn           | -4.981 | -2.979 | -4.703 | -4.198 | -3.968 | -2.807 | -4.095 | -3.956 | -3.234 | -4.410 | 94040         | CLMN      | NR_104437_12_-_1 |
| Clmn           | -4.981 | -3.888 | -4.833 | -4.599 | -4.520 | -4.804 | -4.409 | -4.658 | -3.823 | -4.498 | 94040         | CLMN      | NR_104438_12_-_1 |
| Clmn           | -4.981 | -2.680 | -4.693 | -4.075 | -3.385 | -3.381 | -3.990 | -3.560 | -2.916 | -2.468 | 94040         | CLMN      | NR_104439_12_-_1 |
| Tctn1          | -4.391 | -4.207 | -1.416 | -4.816 | -1.237 | -4.859 | -4.430 | -4.852 | -2.691 | -3.792 | 654470        | TCTN1     | NR_104441_5_-_1  |
| Rtn1           | -1.348 | -2.319 | 2.327  | 1.166  | 3.523  | 2.782  | 3.373  | -0.563 | -0.858 | -4.168 | 104001        | RTN1      | NR_104446_12_-_1 |
| Galnt9         | -4.981 | -4.981 | -4.967 | -4.727 | -4.969 | -4.981 | -1.834 | -2.173 | 0.852  | 0.980  | 231605        | GALNT9    | NR_104449_5_+_1  |
| Cuta           | 4.192  | 4.343  | 3.682  | 3.985  | 3.067  | 2.928  | 3.433  | 3.674  | 3.071  | 2.982  | 67675         | CUTA      | NR_104458_17_-_1 |
| Tex264         | -0.182 | -3.540 | -3.017 | -3.479 | -1.797 | -4.895 | -3.148 | -4.914 | -4.662 | -4.843 | 21767         | TEX264    | NR_104459_9_-_1  |
| Ahnak          | -2.650 | -2.482 | -4.077 | -4.950 | -4.958 | -3.546 | -4.764 | -4.967 | -2.894 | -1.921 | 66395         | AHNAK     | NR_104460_19_+_1 |
| Ppp4r1         | 2.305  | 2.413  | -0.491 | -1.349 | -0.343 | -0.505 | -0.727 | 0.533  | -4.153 | -4.270 | 70351         | PPP4R1    | NR_104465_17_+_1 |
| Hnrnpa2b1      | 7.148  | 7.453  | 7.570  | 7.531  | 7.914  | 7.895  | 7.246  | 7.260  | 6.243  | 6.394  | 53379         | HNRNPA2B1 | NR_104468_6_-_1  |
| Rab43          | -4.691 | -4.256 | 1.695  | 1.243  | -3.137 | -3.849 | -0.669 | -0.036 | 0.417  | -0.956 | 69834         | RAB43     | NR_104477_6_-_1  |
| Rab43          | -4.628 | -4.127 | 1.701  | 0.092  | -2.457 | -4.094 | -1.787 | -2.048 | 0.580  | 0.492  | 69834         | RAB43     | NR_104478_6_-_1  |
| Banf1          | 2.476  | 1.592  | 2.050  | 1.408  | 2.469  | 1.637  | 2.602  | 1.548  | 1.629  | -0.222 | 23825         | BANF1     | NR_104482_19_-_1 |
| Arhgap25       | 1.273  | 1.159  | 1.298  | 1.128  | 2.289  | 2.026  | 1.216  | 1.040  | 2.096  | 2.171  | 232201        | ARHGAP25  | NR_104483_6_-_1  |
| Erc1           | -4.335 | 0.249  | 1.332  | 0.922  | -0.113 | -1.294 | -0.440 | 0.769  | -1.715 | 0.103  | 111173        | ERC1      | NR_104484_6_-_1  |
| Tmem176b       | -4.981 | -2.235 | -0.676 | -0.463 | 1.133  | 1.226  | 1.605  | 0.847  | 0.671  | 1.146  | 65963         | TMEM176B  | NR_104575_6_-_1  |
| Strip2         | -3.539 | -3.083 | 0.844  | 0.130  | -0.722 | -2.835 | -3.078 | -2.740 | -4.510 | -4.296 | 320609        | STRIP2    | NR_104576_6_+_1  |
| Slc8a1         | 1.625  | 1.641  | 4.819  | 4.536  | 4.684  | 4.971  | 4.570  | 4.677  | 5.114  | 5.959  | 20541         | SLC8A1    | NR_104580_17_-_1 |
| Xntrpc         | -4.639 | -4.882 | -4.321 | -4.501 | -2.937 | -2.554 | -3.825 | -4.412 | -1.535 | -4.731 | 102443351     | NA        | NR_104582_7_+_1  |
| Rnaseh1        | 0.897  | 0.081  | -0.200 | -3.991 | 0.568  | -2.098 | -0.865 | -2.507 | -0.427 | -4.959 | 19819         | RNASEH1   | NR_104608_12_+_1 |
| Pla2g12a       | -2.258 | -4.981 | -2.115 | -4.941 | -4.641 | -4.118 | -4.928 | -3.178 | -4.981 | -4.981 | 66350         | PLA2G12A  | NR_104611_3_+_1  |
| 1010001N08Rik  | -3.028 | -3.408 | -3.777 | -4.740 | -3.983 | -4.503 | -3.967 | -4.782 | -2.678 | -4.981 | 68434         | NA        | NR_105023_18_-_1 |
| 1700124L16Rik  | -3.099 | -4.981 | -3.956 | -4.420 | -3.945 | -4.632 | -4.466 | -4.728 | -2.608 | -4.981 | 67934         | NA        | NR_105027_6_-_1  |
| Gm12596        | -1.049 | -4.981 | -3.992 | -4.934 | -3.737 | -4.791 | -4.973 | -4.548 | -4.394 | -4.981 | 101055769     | NA        | NR_105031_4_+_1  |
| Record_removed | 1.931  | 2.034  | 2.120  | 1.800  | 2.305  | 1.889  | 2.422  | 2.256  | 3.293  | 3.361  | Record_remove | NA        | NR_105032_5_-_1  |
| Gm15908        | -4.981 | -4.981 | -4.981 | -4.981 | -4.725 | -4.745 | -4.935 | -4.512 | -4.981 | -4.981 | 101056149     | NA        | NR_105041_13_+_1 |
| Hltf           | 2.315  | 2.742  | 2.586  | 1.154  | 2.394  | -0.259 | 1.276  | -2.075 | 0.251  | -0.091 | 20585         | HLTF      | NR_105046_3_+_1  |
| Hltf           | 2.339  | 2.940  | 3.527  | 2.877  | 3.854  | 3.860  | 3.448  | 2.497  | 2.777  | 2.548  | 20585         | HLTF      | NR_105047_3_+_1  |
| Dreh           | -4.981 | -4.981 | -1.215 | -2.320 | -4.981 | -4.981 | -4.945 | -4.920 | -4.981 | -4.981 | 101202683     | NA        | NR_105051_17_+_1 |
| Gm17026        | -4.981 | -2.895 | -4.988 | -2.768 | -4.906 | 0.784  | -4.880 | -0.098 | -4.981 | 0.547  | 101056136     | NA        | NR_105055_14_-_1 |
| Mir6385        | -1.778 | -2.340 | -4.615 | -4.442 | -4.943 | -4.329 | -4.755 | -3.967 | -4.981 | -4.981 | 102466639     | NA        | NR_105806_9_+_1  |
| Mir6516        | -2.727 | -2.616 | -3.579 | -4.598 | -3.557 | -4.782 | -3.047 | -4.443 | -2.691 | -2.730 | 102465258     | NA        | NR_105853_11_+_1 |
| Mir6539        | -4.981 | -4.981 | -3.826 | -4.311 | -4.088 | -4.846 | -4.487 | -4.846 | -3.351 | -4.227 | 102465310     | NA        | NR_105857_14_-_1 |
| Mir6935        | -4.981 | -4.981 | -4.382 | -4.267 | -4.072 | -4.921 | -4.768 | -4.899 | -4.981 | -4.342 | 102465564     | NA        | NR_105900_11_-_1 |
| Mir6973a       | -4.981 | -4.981 | -4.981 | -4.981 | -4.205 | -4.679 | -4.863 | -4.966 | -4.981 | -4.981 | 102465588     | NA        | NR_105939_17_+_1 |
| Mir6992        | -4.981 | -2.883 | -4.654 | -4.323 | -4.468 | -4.870 | -4.755 | -4.792 | -3.461 | -3.853 | 102465599     | NA        | NR_105958_19_+_1 |
| Mir7035        | -4.981 | -4.981 | -4.801 | -4.943 | -4.955 | -4.788 | -4.732 | -4.883 | -4.981 | -4.981 | 102465626     | NA        | NR_106002_5_+_1  |
| Mir7091        | -4.981 | -4.981 | -4.681 | -4.830 | -4.761 | -4.978 | -4.688 | -4.476 | -4.394 | -3.758 | 102466804     | NA        | NR_106059_X_-_1  |
| Mir3473f       | -4.981 | -4.981 | -4.332 | -4.691 | -4.415 | -4.937 | -4.932 | -4.929 | -4.390 | -4.981 | 102466254     | NA        | NR_106164_1_-_1  |
| Mir8096        | -4.981 | -4.981 | -4.981 | -4.981 | -4.966 | -4.085 | -4.979 | -4.975 | -4.981 | -4.981 | 102466882     | NA        | NR_106172_1_+_1  |
| Mir142b        | -3.843 | -1.733 | -1.960 | -2.857 | -1.631 | -2.537 | -2.497 | -2.892 | -4.981 | -2.747 | 102466883     | NA        | NR_106176_11_-_1 |

|               |        |        |        |        |        |        |        |        |        |        |           |            |                 |
|---------------|--------|--------|--------|--------|--------|--------|--------|--------|--------|--------|-----------|------------|-----------------|
| Mir8100       | -4.981 | -4.981 | -4.028 | -4.824 | -4.981 | -4.981 | -4.981 | -4.981 | -4.981 | -4.981 | 102465996 | NA         | NR_106177_11_+1 |
| Mir1668       | -4.981 | -1.941 | -3.690 | -3.942 | -3.484 | -4.529 | -4.397 | -4.854 | -4.394 | -4.227 | 102465897 | NA         | NR_106188_8_-1  |
| Mir8112       | -4.981 | -4.981 | -3.163 | -4.578 | -4.512 | -4.674 | -4.603 | -4.478 | -4.190 | -3.481 | 102465900 | NA         | NR_106192_6_+1  |
| Mir8120       | -4.981 | -4.981 | -4.981 | -4.981 | -4.496 | -4.724 | -4.478 | -4.430 | -4.981 | -4.981 | 102465905 | NA         | NR_106200_3_+1  |
| Gm16712       | 1.448  | 1.342  | 2.366  | 2.145  | 2.471  | 1.756  | 2.024  | 1.528  | 2.570  | 2.125  | 100504333 | NA         | NR_108021_17_-1 |
| Gm16740       | 2.495  | 1.784  | -0.045 | -0.493 | 0.525  | 0.448  | 0.350  | -0.132 | -0.017 | 0.249  | 100504029 | NA         | NR_108026_3_+1  |
| 9030619P08Rik | 3.031  | 2.558  | -2.132 | -4.192 | -4.946 | -4.890 | -4.979 | -4.838 | -2.370 | -4.981 | 105892    | NA         | NR_108041_15_-1 |
| Glb1          | -4.694 | -4.317 | -0.113 | -0.041 | -1.160 | 1.042  | -1.643 | -2.118 | -1.483 | 0.467  | 12091     | GLB1       | NR_108101_9_+1  |
| Glb1          | -2.566 | 3.532  | -0.226 | 3.062  | -1.224 | 2.737  | -0.631 | 3.189  | 0.677  | 2.627  | 12091     | GLB1       | NR_108102_9_+1  |
| 4930596121Rik | -4.981 | -2.275 | -1.049 | -2.205 | -4.056 | -3.630 | -3.719 | -3.368 | -3.925 | -3.758 | 78229     | NA         | NR_108103_1_+1  |
| Mst1r         | -4.981 | -4.981 | -4.981 | -4.981 | -4.882 | -4.908 | -3.466 | -4.970 | 1.309  | -3.091 | 19882     | MST1R      | NR_109782_9_+1  |
| Mir692-2      | -4.981 | -3.654 | -3.827 | -4.854 | -4.478 | -4.865 | -4.123 | -4.760 | -3.859 | -4.539 | 735288    | NA         | NR_109835_13_+1 |
| Mir692-2      | -4.981 | -3.654 | -3.827 | -4.854 | -4.478 | -4.865 | -4.121 | -4.760 | -3.859 | -4.539 | 735288    | NA         | NR_109835_4_+1  |
| Arhgap6       | -3.585 | -3.451 | -3.991 | -4.491 | -2.392 | -2.274 | -4.044 | -4.678 | -4.424 | -4.797 | 11856     | ARHGAP6    | NR_109847_X_+1  |
| Atg9a         | -1.309 | 2.384  | 1.276  | 0.502  | 0.874  | 0.376  | 1.081  | -0.131 | 1.571  | 1.922  | 245860    | ATG9A      | NR_109938_1_-1  |
| 4631405J19Rik | -4.981 | -4.981 | -4.821 | -4.973 | -4.826 | -2.445 | -4.981 | -4.981 | -4.981 | -4.981 | 433456    | NA         | NR_110333_2_+1  |
| A530013C23Rik | -4.981 | -4.981 | -4.119 | -3.917 | -4.951 | -4.951 | -2.090 | -1.591 | -0.276 | -1.559 | 329562    | NA         | NR_110334_2_+1  |
| Elf4a2        | 5.290  | 5.759  | 4.856  | 4.625  | 4.642  | 4.758  | 4.534  | 4.624  | 4.117  | 3.940  | 13682     | EIF4A2     | NR_110335_16_+1 |
| Dgkeos        | -1.057 | -1.126 | -4.358 | -2.747 | -4.974 | -4.931 | -3.013 | -4.437 | -4.981 | -4.981 | 414094    | NA         | NR_110336_11_+1 |
| Spn           | 1.594  | 1.792  | -0.755 | -1.545 | -0.100 | -0.798 | 2.485  | 1.642  | 2.286  | 2.057  | 20737     | SPN        | NR_110337_7_-1  |
| Trem1         | -4.913 | -4.981 | -4.072 | -4.311 | -3.843 | -4.335 | -3.744 | -4.912 | -2.964 | -4.981 | 71326     | TREML1     | NR_110338_17_+1 |
| Gpx4          | -1.839 | -3.052 | -3.154 | -3.636 | -4.029 | -3.398 | -2.468 | -4.124 | -2.217 | -3.395 | 625249    | GPX4       | NR_110342_10_+1 |
| Sh3yl1        | -4.719 | -4.981 | -4.923 | -4.943 | -4.907 | -4.970 | -3.972 | -4.956 | -4.857 | -4.973 | 24057     | SH3YL1     | NR_110343_12_+1 |
| Tcerg1        | 2.329  | 1.838  | 2.983  | 3.528  | 4.007  | 3.452  | 2.987  | 2.266  | 1.343  | 2.365  | 56070     | TCERG1     | NR_110344_18_+1 |
| Adarb2        | -1.862 | 0.219  | -2.791 | -0.433 | -2.563 | -0.311 | -2.272 | -0.787 | -2.873 | -0.721 | 94191     | ADARB2     | NR_110345_13_+1 |
| Sh2b1         | 3.095  | 4.152  | 2.320  | 1.339  | 2.596  | 2.101  | 2.137  | 2.655  | 1.207  | 2.386  | 20399     | SH2B1      | NR_110346_7_-1  |
| St6galnac6    | -0.808 | -4.139 | -2.970 | -1.810 | -0.176 | 0.396  | 0.975  | 0.716  | 1.996  | 2.527  | 50935     | ST6GALNAC6 | NR_110347_2_+1  |
| Sytl2         | -4.981 | -4.981 | -4.938 | -4.578 | -4.981 | -4.808 | -4.923 | -4.157 | -3.373 | -4.981 | 83671     | SYTL2      | NR_110348_7_+1  |
| Psd2          | -2.283 | -3.102 | -3.596 | -4.255 | -4.487 | -4.377 | -3.562 | -2.789 | -4.340 | -3.613 | 74002     | PSD2       | NR_110349_18_+1 |
| Tasp1         | -4.457 | -0.902 | -2.160 | -4.891 | -3.226 | -1.602 | -4.720 | -2.514 | -4.437 | -2.405 | 75812     | TASP1      | NR_110350_2_-1  |
| Tasp1         | -3.096 | -0.685 | -1.559 | -2.880 | -0.268 | -1.432 | -2.161 | -2.439 | -1.853 | -0.919 | 75812     | TASP1      | NR_110351_2_-1  |
| Tasp1         | 0.091  | -0.362 | -3.544 | -3.061 | -1.737 | -1.981 | -4.967 | -4.980 | -4.978 | -2.060 | 75812     | TASP1      | NR_110352_2_-1  |
| Celf3         | -4.053 | -3.450 | -4.412 | -3.953 | -4.606 | -4.556 | -4.054 | -4.250 | -3.000 | -2.197 | 78784     | CELF3      | NR_110353_3_+1  |
| R74862        | -2.739 | -4.981 | 0.808  | 0.939  | -0.715 | -2.075 | -0.694 | -1.055 | -3.249 | -1.715 | 97423     | NA         | NR_110354_7_-1  |
| R74862        | -4.641 | -4.981 | -1.189 | -2.411 | -2.630 | -4.115 | -4.279 | -4.799 | -3.479 | -4.981 | 97423     | NA         | NR_110355_7_-1  |
| Tmem241       | 0.870  | 0.120  | 0.005  | 0.029  | 0.773  | 0.851  | -0.196 | -0.120 | 0.392  | 0.780  | 338363    | TMEM241    | NR_110356_18_-1 |
| Kctd17        | -4.981 | -1.179 | 0.997  | 0.155  | 0.383  | -0.529 | -0.056 | 0.532  | 2.105  | 2.332  | 72844     | KCTD17     | NR_110357_15_+1 |
| Pde4dip       | -4.268 | -3.907 | -2.430 | -3.690 | 0.450  | -3.116 | -3.305 | -3.858 | -4.622 | -4.844 | 83679     | PDE4DIP    | NR_110360_3_-1  |
| L3mbtl2       | -0.501 | -4.378 | -2.888 | -3.317 | -0.841 | -2.271 | -0.867 | -2.544 | -0.597 | -0.161 | 214669    | L3MBTL2    | NR_110362_15_+1 |
| E230029C05Rik | -0.156 | -4.981 | -0.778 | -1.422 | 0.366  | -0.072 | 1.062  | 1.672  | 1.140  | 1.311  | 319711    | NA         | NR_110364_7_+1  |
| E230029C05Rik | 0.200  | -1.008 | -1.005 | 0.246  | 0.642  | 2.026  | 1.835  | 3.300  | 1.309  | 2.645  | 319711    | NA         | NR_110365_7_+1  |
| 6820408C15Rik | -1.842 | -4.529 | -4.803 | -4.699 | -4.905 | -4.957 | -4.898 | -4.978 | -4.981 | -4.981 | 228778    | C20orf96   | NR_110367_2_+1  |
| 6820408C15Rik | -3.376 | -1.254 | -4.114 | -4.576 | -4.581 | -4.305 | -4.963 | -4.945 | -4.981 | -4.981 | 228778    | C20orf96   | NR_110368_2_+1  |
| Rnf32         | -4.981 | -4.981 | -4.951 | -4.273 | -4.977 | -3.610 | -4.971 | -4.843 | -4.981 | -4.981 | 56874     | RNF32      | NR_110371_5_+1  |
| Dgcr6         | -1.653 | -4.981 | -3.214 | -4.979 | -4.960 | -4.962 | -4.918 | -4.948 | -1.342 | -2.896 | 13353     | NA         | NR_110380_16_+1 |
| Cyp2r1        | -4.981 | -0.529 | -2.155 | -4.847 | -3.017 | -4.685 | -2.392 | -3.421 | -0.977 | -4.872 | 244209    | CYP2R1     | NR_110407_7_-1  |
| Cyp2r1        | -2.131 | -2.875 | -2.070 | -1.780 | -0.643 | -3.003 | -2.060 | -2.938 | -2.069 | -2.209 | 244209    | CYP2R1     | NR_110408_7_-1  |
| Cox6b2        | -4.981 | -1.393 | -3.795 | -1.522 | -3.552 | -2.472 | -1.860 | -1.408 | -2.108 | -1.066 | 333182    | COX6B2     | NR_110411_7_-1  |
| Ptgs2os2      | -0.828 | -1.693 | -0.534 | -2.283 | 4.349  | 3.956  | 3.246  | 1.265  | -1.323 | -1.588 | 102639566 | NA         | NR_110420_1_-1  |
| Eldr          | 6.244  | 6.295  | -1.763 | -1.261 | -4.973 | -4.453 | -4.961 | -4.591 | -4.835 | -4.972 | 72735     | NA         | NR_110421_11_-1 |
| Eldr          | 6.339  | 6.437  | -0.003 | -0.802 | -2.984 | -1.442 | -2.604 | -1.199 | -4.690 | -4.927 | 72735     | NA         | NR_110422_11_-1 |
| Eldr          | 0.183  | 1.343  | -4.693 | -4.852 | -4.952 | -4.883 | -4.781 | -4.274 | -4.695 | -3.346 | 72735     | NA         | NR_110423_11_-1 |
| Eldr          | 7.052  | 6.940  | 1.645  | 1.412  | -0.209 | -0.990 | -0.199 | -0.719 | -2.620 | -2.657 | 72735     | NA         | NR_110424_11_-1 |
| Eldr          | 5.906  | 5.705  | 0.597  | -0.261 | -1.392 | -2.547 | -0.129 | -1.807 | -2.815 | -3.779 | 72735     | NA         | NR_110425_11_-1 |
| 4930459C07Rik | -4.981 | -4.981 | -4.986 | -4.986 | -4.341 | -4.622 | -4.917 | -3.717 | -2.278 | -1.619 | 74881     | NA         | NR_110448_10_+1 |
| Crnde         | -3.349 | -4.981 | -3.610 | -4.861 | -3.686 | -4.925 | -3.603 | -4.429 | -3.750 | -3.855 | 71296     | NA         | NR_110452_8_-1  |
| Lncpint       | 3.251  | 3.446  | 1.425  | 1.589  | 2.440  | 2.667  | 1.397  | 1.614  | 1.497  | 1.412  | 232685    | NA         | NR_110469_6_-1  |
| Lncpint       | 3.371  | 3.313  | 1.914  | 1.890  | 2.303  | 2.894  | 1.983  | 1.551  | 1.960  | 1.904  | 232685    | NA         | NR_110470_6_-1  |
| Lncpint       | -0.992 | -0.368 | -1.645 | -1.377 | -1.679 | -1.396 | -1.052 | -1.830 | -1.565 | -1.732 | 232685    | NA         | NR_110471_6_-1  |
| Gm12338       | 4.573  | 4.943  | 4.564  | 4.608  | 4.043  | 4.447  | 4.566  | 4.559  | 3.840  | 3.814  | 654359    | NA         | NR_110477_11_-1 |
| Lncppara      | -3.843 | -2.616 | -3.903 | -4.363 | -2.684 | -4.245 | -2.246 | -4.792 | -1.517 | -2.343 | 102800312 | NA         | NR_110483_15_+1 |
| 4921529L05Rik | -2.273 | -4.981 | -4.952 | -4.952 | -4.691 | -4.965 | -2.431 | -4.766 | -3.531 | -4.981 | 320178    | NA         | NR_110484_6_+1  |
| 9230116L04Rik | -0.080 | 1.118  | -3.075 | -1.657 | -1.349 | -2.757 | -2.976 | -2.674 | -1.080 | -3.008 | 321017    | NA         | NR_110486_12_-1 |
| AW822252      | -4.981 | -4.981 | -2.233 | -1.770 | -3.909 | -2.509 | -4.957 | -4.148 | -4.981 | -3.386 | 331578    | NA         | NR_110489_X_-1  |
| Tug1          | 5.383  | 4.474  | 5.777  | 5.264  | 5.330  | 5.528  | 5.404  | 5.573  | 6.435  | 6.890  | 544752    | NA         | NR_110490_11_-1 |
| A330074K22Rik | -4.981 | -4.981 | -4.952 | -4.952 | -4.195 | -5.002 | -4.052 | -4.950 | -4.981 | -4.981 | 434353    | NA         | NR_110496_8_-1  |
| Rpl14-ps1     | 2.780  | 2.231  | 3.541  | 3.368  | 2.628  | 2.283  | 3.060  | 2.452  | 1.767  | 1.449  | 100040970 | NA         | NR_110499_7_+1  |
| Gm31763       | -3.843 | -2.064 | -1.730 | -4.989 | -0.596 | -3.050 | -0.268 | -2.734 | -3.043 | -2.976 | 102634101 | NA         | NR_110511_10_+1 |
| Gm32511       | -4.981 | -1.612 | -2.427 | -0.840 | -1.383 | 0.937  | -3.016 | -1.307 | -4.981 | -4.981 | 102635087 | NA         | NR_110517_9_+1  |
| Gm3458        | -4.981 | -4.981 | -4.998 | -2.719 | -3.384 | -3.594 | -3.344 | -4.969 | -4.981 | -4.981 | 100041660 | NA         | NR_110518_9_-1  |
| Gm3458        | -4.981 | -4.981 | -4.654 | -4.424 | -2.590 | -2.042 | -4.740 | -4.789 | -4.981 | -4.981 | 100041660 | NA         | NR_110519_9_-1  |
| 2010111I01Rik | 1.929  | 3.208  | -1.719 | 0.278  | 0.538  | 0.438  | 1.599  | 2.192  | 0.932  | 2.035  | 72061     | C9orf3     | NR_110520_13_+1 |
| 2010111I01Rik | -1.869 | -0.928 | -3.477 | -3.668 | -3.199 | -4.434 | -2.676 | -4.475 | -2.921 | -3.201 | 72061     | C9orf3     | NR_110521_13_+1 |
| Zeb2os        | 3.841  | 3.629  | -0.451 | -0.901 | 1.221  | 1.225  | 2.962  | 2.418  | 3.577  | 3.052  | 433424    | NA         | NR_110571_2_+1  |

|               |        |        |        |        |        |        |        |        |        |        |        |          |                 |
|---------------|--------|--------|--------|--------|--------|--------|--------|--------|--------|--------|--------|----------|-----------------|
| Zeb2os        | 1.399  | 1.799  | -4.528 | -3.730 | 0.430  | -0.571 | 0.716  | 1.055  | 1.628  | 2.253  | 433424 | NA       | NR_110572_2_+1  |
| A230103J11Rik | -4.981 | -4.847 | -3.854 | -4.357 | -4.926 | -4.926 | -4.278 | -4.159 | -4.840 | -4.972 | 320466 | NA       | NR_110581_8_-1  |
| A230103J11Rik | -3.563 | -2.794 | -3.974 | -3.712 | -3.955 | -3.618 | -4.325 | -3.069 | -2.050 | -3.683 | 320466 | NA       | NR_110582_8_-1  |
| Ccdc169       | -4.834 | -4.981 | -4.949 | -4.975 | -4.967 | -4.974 | -4.981 | -4.981 | -4.981 | -4.981 | 320604 | CCDC169  | NR_110776_3_+1  |
| Ccdc169       | -3.303 | -4.981 | -3.957 | -4.096 | -4.573 | -4.651 | -4.977 | -4.925 | -4.981 | -4.981 | 320604 | CCDC169  | NR_110780_3_+1  |
| Ccdc169       | -4.172 | -4.981 | -4.733 | -4.814 | -4.807 | -4.887 | -4.980 | -4.968 | -4.981 | -4.981 | 320604 | CCDC169  | NR_110781_3_+1  |
| Pld6          | -3.843 | -2.137 | -4.139 | -3.002 | -4.599 | -4.523 | -4.433 | -3.198 | -4.981 | -3.449 | 194908 | NA       | NR_110894_11_-1 |
| Tmem67        | -4.609 | -1.094 | -0.284 | -3.422 | -1.332 | -1.618 | -2.273 | -2.900 | -1.558 | -1.803 | 329795 | TMEM67   | NR_110955_4_-1  |
| Inpp5e        | -3.352 | -2.559 | -0.686 | -2.592 | -1.687 | -1.901 | -0.782 | -1.168 | 0.277  | 0.331  | 64436  | INPP5E   | NR_110957_2_-1  |
| Zfp428        | -4.981 | -4.649 | -4.971 | -4.977 | -4.930 | -4.464 | -3.983 | -4.964 | -4.592 | -4.981 | 232969 | ZNF428   | NR_110958_7_+1  |
| Rnf185        | -1.072 | -3.920 | -2.678 | -4.443 | -4.671 | -1.470 | -1.118 | -4.390 | 0.643  | -0.640 | 193670 | RNF185   | NR_110959_11_-1 |
| Rhbdd3        | 0.995  | 1.178  | 0.976  | 0.945  | 0.539  | -1.799 | -0.075 | 0.925  | 0.586  | -0.585 | 279766 | RHBDD3   | NR_110961_11_+1 |
| Trub2         | -4.346 | -0.601 | -0.873 | -2.207 | -3.379 | -1.057 | -0.731 | -0.983 | -3.069 | -0.649 | 227682 | TRUB2    | NR_110962_2_-1  |
| Dolpp1        | -4.760 | -1.330 | -0.621 | -2.579 | -2.733 | -2.900 | -2.229 | -4.963 | -4.855 | -0.625 | 57170  | DOLPP1   | NR_110963_2_+1  |
| Mospd1        | 1.915  | -4.073 | -4.224 | -0.319 | -2.579 | -4.683 | -2.590 | -4.651 | -4.644 | -3.649 | 70380  | MOSPD1   | NR_110964_X_-1  |
| Swi5          | 0.341  | 0.896  | -0.769 | -0.999 | -1.164 | -1.718 | -0.563 | -0.580 | -0.420 | -0.869 | 72931  | SWI5     | NR_110965_2_-1  |
| Rp2           | -0.009 | -0.662 | 0.430  | -0.396 | 1.068  | 0.957  | -0.518 | -2.231 | -0.678 | -1.810 | 19889  | RP2      | NR_110966_X_+1  |
| Rp2           | -0.237 | 1.030  | -2.560 | -3.305 | -1.942 | -2.394 | -2.063 | -4.846 | -1.291 | -2.657 | 19889  | RP2      | NR_110967_X_+1  |
| Golga1        | 2.963  | 2.961  | 2.945  | 1.856  | 3.070  | 3.058  | 2.349  | 2.001  | 1.820  | 1.758  | 76899  | GOLGA1   | NR_110968_2_-1  |
| Sh3kbp1       | 1.085  | 1.376  | 0.839  | -1.182 | 0.600  | 0.199  | -0.752 | 0.862  | 2.617  | 2.512  | 58194  | SH3KBP1  | NR_110969_X_+1  |
| Sh3kbp1       | -2.349 | 0.444  | -0.221 | -2.462 | -1.168 | -1.899 | -3.897 | -0.694 | -0.415 | -1.350 | 58194  | SH3KBP1  | NR_110970_X_+1  |
| Smap1         | -2.724 | 0.343  | -3.274 | -2.828 | -2.699 | -1.915 | -2.049 | -3.434 | -1.975 | -1.918 | 98366  | SMAP1    | NR_110972_1_-1  |
| Ranbp17       | -3.236 | -2.703 | -3.811 | -2.824 | -4.628 | -2.966 | -4.199 | -4.307 | -4.817 | -4.364 | 66011  | RANBP17  | NR_110973_11_-1 |
| Tsga10        | 1.534  | 1.558  | -0.031 | -1.166 | 0.277  | -0.370 | 0.663  | 0.764  | 2.292  | 2.572  | 211484 | TSGA10   | NR_110976_1_-1  |
| Mettl5        | 0.173  | 0.651  | 1.377  | 0.460  | 0.987  | 0.017  | 1.250  | -1.617 | -0.212 | 0.355  | 75422  | METTL5   | NR_110977_2_-1  |
| Tmem222       | 3.313  | 3.999  | 3.085  | 3.730  | 3.606  | 3.921  | 3.197  | 3.384  | 3.151  | 3.175  | 52174  | TMEM222  | NR_110978_4_-1  |
| Ppp1r1c       | -4.981 | -4.981 | -4.830 | -4.973 | -4.845 | -4.806 | -4.981 | -4.981 | -4.981 | -4.981 | 75276  | PPP1R1C  | NR_110980_2_+1  |
| Slc39a13      | 0.818  | 1.669  | 1.146  | 0.561  | 0.816  | 1.092  | 1.512  | 1.051  | -1.856 | 1.172  | 68427  | SLC39A13 | NR_110981_2_-1  |
| Tubgcp4       | 2.681  | 1.741  | 2.377  | 2.204  | 2.438  | 2.685  | 1.812  | 2.067  | 2.394  | 3.362  | 51885  | TUBGCP4  | NR_110985_2_+1  |
| Serf2         | 5.011  | 5.094  | 4.604  | 4.473  | 4.540  | 4.960  | 4.653  | 4.639  | 4.407  | 4.413  | 378702 | SERF2    | NR_110986_2_+1  |
| Lmtk3         | -4.981 | -4.981 | -4.792 | -4.965 | -4.579 | -4.892 | -4.231 | -4.733 | -4.981 | -4.981 | 381983 | LMTK3    | NR_110987_7_+1  |
| Kcnp3         | -4.146 | -4.981 | 0.261  | -0.723 | -1.962 | -2.388 | -0.081 | -3.519 | -4.411 | -4.847 | 56461  | KCNIP3   | NR_110989_2_-1  |
| Ap5s1         | 3.413  | 3.539  | 2.141  | 2.322  | 2.618  | 2.679  | 2.770  | 2.582  | 2.831  | 2.786  | 69596  | AP5S1    | NR_110992_2_+1  |
| Cd68          | 3.914  | 3.490  | 3.064  | 2.969  | 3.664  | 3.636  | 3.973  | 3.483  | 3.111  | 3.015  | 12514  | CD68     | NR_110993_11_-1 |
| Dynlrb1       | 1.286  | 0.226  | -0.134 | -1.953 | -0.818 | -1.900 | -0.775 | -2.407 | 0.231  | -1.982 | 67068  | DYNLRB1  | NR_111890_2_+1  |
| Dynlrb1       | 1.345  | 1.980  | 1.719  | 0.273  | 1.041  | 0.055  | 1.704  | 0.922  | 1.376  | 0.850  | 67068  | DYNLRB1  | NR_111891_2_+1  |
| Stau1         | 1.736  | 1.887  | 0.862  | 1.250  | 1.828  | 1.001  | 2.110  | 1.141  | 1.255  | -0.346 | 20853  | STAU1    | NR_111895_2_-1  |
| Timm22        | -3.879 | -3.454 | -4.626 | -4.841 | -4.367 | -4.837 | -4.038 | -4.801 | -4.981 | -4.534 | 56322  | TIMM22   | NR_111896_11_+1 |
| Nfatc2        | -4.981 | -4.981 | -4.980 | -4.981 | -4.981 | -4.981 | -4.940 | -4.978 | -4.981 | -4.981 | 18019  | NFATC2   | NR_111897_2_-1  |
| Nfatc2        | -4.981 | -4.565 | -4.949 | -4.943 | -4.951 | -4.977 | -4.899 | -4.977 | -4.981 | -4.981 | 18019  | NFATC2   | NR_111898_2_-1  |
| Tpd52l2       | -2.543 | -4.981 | -2.898 | -4.902 | -3.776 | -3.976 | -2.311 | -4.183 | -1.296 | -2.702 | 66314  | TPD52L2  | NR_111899_2_+1  |
| Mrps23        | -4.981 | -4.981 | -4.981 | -4.981 | -4.981 | -4.981 | -4.973 | -4.980 | -4.836 | -4.973 | 64656  | MRPS23   | NR_111902_11_+1 |
| Tm6sf1        | -1.670 | -4.567 | -0.204 | -0.640 | -0.005 | -0.837 | -0.142 | -1.911 | 1.685  | 0.667  | 107769 | TM6SF1   | NR_111910_7_+1  |
| Hikeshi       | -1.777 | -2.508 | -1.699 | -3.086 | -2.107 | -2.535 | -1.397 | -3.397 | -0.581 | -2.401 | 67669  | HIKESHI  | NR_111916_7_-1  |
| Art5          | -4.981 | -4.981 | -4.981 | -4.981 | -4.971 | -4.959 | -4.954 | -4.252 | -4.981 | -4.981 | 11875  | ART5     | NR_111935_7_-1  |
| Pgap2         | 1.828  | -0.210 | -1.376 | -3.475 | -1.065 | -1.946 | 1.174  | 0.363  | -2.490 | -3.907 | 233575 | NA       | NR_111937_7_+1  |
| Pgap2         | -4.169 | -2.303 | -0.944 | -4.579 | -3.342 | -1.482 | -2.029 | -3.779 | -2.100 | -4.928 | 233575 | NA       | NR_111938_7_+1  |
| Dido1         | 1.769  | 1.361  | -1.250 | -1.116 | 1.683  | 0.766  | 1.044  | -0.579 | -2.780 | -1.675 | 23856  | DIDO1    | NR_111965_2_-1  |
| Sema3b        | -4.981 | -4.981 | -3.801 | -4.218 | -4.952 | -4.321 | -4.968 | -3.122 | -2.614 | -4.981 | 20347  | SEMA3B   | NR_111986_9_-1  |
| Map4k2        | 3.516  | 1.397  | 1.483  | 2.242  | 1.841  | 2.240  | 0.761  | 1.877  | 2.158  | 2.092  | 26412  | MAP4K2   | NR_117093_19_+1 |
| Adam17        | 1.258  | 1.905  | 0.365  | 1.131  | 2.091  | 1.821  | 2.165  | 1.456  | 2.060  | 0.999  | 11491  | ADAM17   | NR_120376_12_-1 |
| Lin9          | 0.466  | -3.616 | -4.255 | -2.464 | -4.660 | -1.413 | -2.103 | -4.561 | -4.148 | -4.481 | 72568  | LIN9     | NR_120498_1_+1  |
| Tspan5        | 0.458  | -4.646 | -0.614 | -3.208 | 0.675  | -0.887 | 1.383  | 0.946  | 3.464  | 2.521  | 56224  | TSPAN5   | NR_121195_3_+1  |
| Plcd1         | -4.981 | -4.981 | -4.137 | -4.639 | -4.171 | -4.935 | -2.614 | -1.566 | -3.896 | -0.310 | 18799  | PLCD1    | NR_121571_9_-1  |
| Uimc1         | -0.153 | 1.148  | 1.153  | 0.597  | 0.530  | 1.999  | 0.099  | 0.141  | 1.071  | 1.244  | 20184  | UIMC1    | NR_121592_13_-1 |
| Gm1965        | -2.599 | 1.922  | 0.881  | 0.557  | -4.969 | -4.971 | -4.802 | -4.954 | -4.981 | -4.981 | 434065 | NA       | NR_121593_6_+1  |
| Gm1965        | 3.533  | 0.222  | 1.654  | 0.690  | -4.967 | -4.969 | -4.768 | -4.945 | -4.981 | -4.981 | 434065 | NA       | NR_121594_6_+1  |
| Gm1965        | 3.329  | 2.375  | 1.439  | 1.188  | -4.926 | -4.942 | -3.833 | -4.855 | -4.981 | -4.981 | 434065 | NA       | NR_121595_6_+1  |
| Gm1965        | 2.787  | 1.930  | 0.636  | -1.358 | -4.262 | -4.880 | -4.527 | -3.618 | -4.981 | -4.981 | 434065 | NA       | NR_121596_6_+1  |
| Atp11a        | -3.111 | -2.816 | -1.092 | -0.658 | 1.780  | -1.222 | -3.008 | -2.724 | -3.869 | -0.123 | 50770  | ATP11A   | NR_121603_8_+1  |
| Plpp5         | 2.755  | 1.787  | 1.158  | -0.401 | -1.751 | 0.439  | 1.135  | -0.584 | -3.611 | 1.857  | 71910  | PLPP5    | NR_121642_8_+1  |
| Plpp5         | -0.172 | 1.355  | 0.362  | -0.452 | -0.481 | -1.385 | -0.775 | -1.632 | -1.202 | -2.053 | 71910  | PLPP5    | NR_121643_8_+1  |
| Rorc          | -4.981 | -4.981 | -4.232 | -4.966 | -2.165 | 2.230  | -4.395 | 1.009  | -4.981 | -4.981 | 19885  | RORC     | NR_121656_3_+1  |
| Trim46        | -0.531 | -1.014 | -4.315 | -4.431 | -4.726 | -4.942 | -4.862 | -4.830 | -2.430 | -4.981 | 360213 | TRIM46   | NR_121683_3_-1  |
| Tmem161a      | -0.277 | -0.353 | -1.130 | -1.387 | 0.142  | -0.504 | -0.311 | -0.562 | -4.755 | -4.891 | 234371 | TMEM161A | NR_122028_8_+1  |
| Ocel1         | 1.204  | 0.617  | -0.993 | -1.744 | -0.846 | -0.814 | -0.760 | -0.879 | 0.412  | -0.560 | 77090  | OCEL1    | NR_122030_8_+1  |
| Gba           | -0.216 | -0.584 | -0.378 | 0.805  | -0.392 | -0.133 | -0.571 | -2.589 | 0.422  | 0.110  | 14466  | GBA      | NR_122037_3_+1  |
| Tsc22d3       | 1.665  | 1.667  | 2.129  | 1.908  | 0.646  | 1.154  | 0.370  | -0.602 | 0.478  | 0.148  | 14605  | TSC22D3  | NR_122039_X_-1  |
| Inpp5d        | -0.027 | 0.887  | 2.161  | 1.414  | 0.496  | 0.639  | 0.706  | -2.814 | -3.797 | 0.407  | 16331  | INPP5D   | NR_122078_1_+1  |
| Dda1          | 2.734  | 2.450  | 2.234  | 1.480  | 1.092  | 0.585  | 0.474  | 1.549  | 2.235  | 1.872  | 66498  | DDA1     | NR_122114_8_+1  |
| Dda1          | 3.325  | 3.195  | 2.730  | 2.799  | 2.527  | 2.783  | 2.198  | 1.472  | 3.039  | 2.138  | 66498  | DDA1     | NR_122115_8_+1  |
| Agbl5         | -4.581 | 0.375  | -4.660 | -4.532 | -2.924 | -1.003 | -2.231 | -2.233 | -4.442 | -4.654 | 231093 | AGBL5    | NR_122116_5_+1  |
| Agbl5         | 1.907  | 1.618  | 1.504  | 0.714  | 1.672  | 1.894  | 1.562  | 0.801  | 0.620  | 1.041  | 231093 | AGBL5    | NR_122117_5_+1  |
| Sf1           | 3.617  | 3.814  | 3.764  | 3.103  | 3.810  | 4.052  | 3.137  | 3.032  | 3.963  | 3.177  | 22668  | NA       | NR_122118_19_+1 |

|               |        |        |        |        |        |        |        |        |        |        |           |          |                 |
|---------------|--------|--------|--------|--------|--------|--------|--------|--------|--------|--------|-----------|----------|-----------------|
| 4930445N18Rik | -1.227 | -2.681 | 0.332  | 0.115  | 0.417  | 0.289  | -0.414 | -2.248 | -2.356 | -2.572 | 73985     | NA       | NR_125720_18_+1 |
| Mb21d1        | -1.280 | -1.800 | 0.523  | 0.450  | 0.039  | 0.180  | 0.691  | -0.200 | -0.586 | -0.483 | 214763    | MB21D1   | NR_125721_9_-1  |
| Gm2694        | -2.151 | -4.981 | -4.456 | -3.945 | -4.450 | -4.924 | -1.986 | -4.947 | -4.981 | -4.981 | 100040294 | NA       | NR_125722_8_+1  |
| Hipk1         | -1.902 | -2.485 | -1.593 | -1.347 | -1.411 | -0.897 | -1.262 | -1.517 | -0.340 | -0.122 | 15257     | HIPK1    | NR_125731_3_-1  |
| Clasrp        | 3.144  | 3.209  | 2.537  | 1.903  | 2.466  | 2.042  | 2.513  | 2.558  | 2.929  | 2.474  | 53609     | NA       | NR_125832_7_-1  |
| Clasrp        | 2.424  | 2.702  | 1.986  | 1.247  | 2.324  | 1.851  | 1.791  | 1.718  | 2.454  | 2.082  | 53609     | NA       | NR_125833_7_-1  |
| Clasrp        | 0.103  | -0.498 | -0.235 | -0.417 | -0.136 | 0.022  | -0.275 | -1.261 | 1.547  | 1.874  | 53609     | NA       | NR_125834_7_-1  |
| Clasrp        | -0.633 | -2.451 | -0.333 | -2.059 | 0.236  | -0.528 | 0.143  | -2.736 | -0.144 | 0.503  | 53609     | NA       | NR_125835_7_-1  |
| Clasrp        | -2.522 | -1.055 | -3.510 | -4.457 | -2.489 | -1.097 | -1.467 | -2.490 | -0.665 | -1.385 | 53609     | NA       | NR_125836_7_-1  |
| Xiap          | 3.481  | 4.202  | 1.933  | 2.999  | 3.504  | 3.701  | 4.072  | 3.185  | 3.523  | 4.407  | 11798     | XIAP     | NR_125870_X_+1  |
| Aup1          | 3.784  | 3.961  | 4.140  | 4.024  | 4.361  | 4.430  | 4.236  | 4.518  | 4.503  | 4.145  | 11993     | AUP1     | NR_125891_6_+1  |
| Sumo3         | -3.372 | -0.351 | 2.493  | 2.854  | -1.855 | -1.308 | -0.427 | -0.245 | -1.513 | 0.360  | 20610     | SUMO3    | NR_125903_10_+1 |
| Sumo3         | 4.285  | 4.918  | 3.158  | 3.357  | 2.694  | 3.470  | 2.626  | 2.626  | 2.289  | 1.730  | 20610     | SUMO3    | NR_125904_10_+1 |
| Azin1         | 2.729  | 3.327  | 1.970  | 2.496  | 2.103  | 2.380  | 2.363  | 2.849  | 2.676  | 2.841  | 54375     | AZIN1    | NR_125913_15_-1 |
| Mpdu1         | 2.088  | 2.029  | 1.765  | 1.274  | 1.894  | 1.674  | 1.417  | 0.476  | 1.175  | 0.879  | 24070     | MPDU1    | NR_125917_11_-1 |
| Dnm1          | -4.981 | -4.244 | -4.979 | -4.979 | -4.895 | -4.969 | -4.978 | -4.980 | -4.981 | -4.981 | 13429     | DNM1     | NR_125959_2_-1  |
| E4f1          | 0.538  | 0.585  | 0.514  | 1.509  | 1.555  | 0.838  | 1.207  | 1.601  | 1.742  | 1.846  | 13560     | E4F1     | NR_125990_17_-1 |
| Stk11         | 1.948  | 1.993  | 0.756  | 0.738  | 2.154  | 2.324  | 2.426  | 0.974  | 0.805  | 1.938  | 20869     | STK11    | NR_126043_10_+1 |
| Fkbp1a        | 1.059  | -0.386 | 0.502  | -3.054 | -1.401 | -1.236 | -0.816 | -1.672 | -0.221 | -1.241 | 14225     | FKBP1A   | NR_126058_2_+1  |
| G630064G18Rik | -4.981 | -4.981 | -4.238 | -4.680 | -4.122 | -4.927 | -4.870 | -4.869 | -4.981 | -4.981 | 414128    | NA       | NR_126063_8_-1  |
| Gm15972       | 0.544  | 0.907  | -3.476 | -3.437 | -1.600 | -2.144 | -0.676 | -1.216 | -0.103 | -0.520 | 100502834 | NA       | NR_126066_18_-1 |
| Gm11423       | 3.859  | 2.951  | 1.612  | 1.260  | 1.726  | 2.006  | 1.760  | 1.496  | 1.513  | 0.074  | 100503272 | NA       | NR_126067_11_-1 |
| Gm11423       | 2.496  | 2.118  | 1.322  | 1.061  | 0.820  | 0.557  | 0.797  | 0.645  | -0.350 | 0.029  | 100503272 | NA       | NR_126068_11_-1 |
| Cenpa         | -0.950 | -0.596 | -0.566 | -0.227 | 0.213  | -1.198 | 0.407  | -1.268 | -0.191 | -0.356 | 12615     | CENPA    | NR_126074_5_+1  |
| 4930447F24Rik | -2.352 | -4.856 | -4.975 | -4.870 | -4.981 | -4.981 | -4.947 | -4.944 | -4.981 | -4.977 | 76873     | NA       | NR_126077_9_+1  |
| A930002C04Rik | -4.981 | -4.981 | -3.058 | -3.598 | -4.976 | -4.921 | -4.960 | -4.971 | -4.981 | -4.981 | 319467    | NA       | NR_126083_13_-1 |
| Pde6g         | -3.843 | -1.349 | -3.187 | -3.345 | -4.254 | -4.037 | -4.936 | -4.882 | -4.981 | -4.981 | 18588     | PDE6G    | NR_126089_11_-1 |
| Tmem138       | 1.822  | 2.286  | 0.214  | 1.198  | 0.757  | 1.457  | -0.581 | 0.753  | -1.828 | -0.339 | 72982     | TMEM138  | NR_126092_19_-1 |
| Dmpk          | -4.872 | -4.554 | -2.537 | -3.043 | -1.656 | -3.326 | -3.714 | -3.335 | -2.924 | -4.892 | 13400     | DMPK     | NR_126095_7_+1  |
| Mrpl55        | -0.640 | 1.330  | -0.911 | 0.806  | -1.577 | 0.980  | -0.826 | 1.357  | -0.798 | 0.921  | 67212     | MRPL55   | NR_126101_11_+1 |
| Pik3r6        | -3.420 | -3.877 | -0.724 | -1.565 | 0.353  | -0.565 | 1.038  | -2.214 | 1.356  | 2.632  | 104709    | PIK3R6   | NR_126153_11_+1 |
| Pik3r6        | -4.538 | -4.698 | -3.876 | -2.630 | 0.201  | 0.221  | -0.379 | 0.738  | 2.667  | 2.674  | 104709    | PIK3R6   | NR_126154_11_+1 |
| Clcn4         | -1.200 | -1.846 | -1.916 | -3.763 | -1.808 | -1.617 | -2.026 | -3.821 | -4.661 | -4.518 | 12727     | CLCN4    | NR_126156_7_-1  |
| Clcn4         | -1.555 | -4.357 | -4.667 | -4.294 | -3.719 | -4.880 | -4.367 | -3.758 | -1.736 | -2.930 | 12727     | CLCN4    | NR_126157_7_-1  |
| Phf1          | 2.678  | 3.129  | 1.765  | 1.739  | 2.185  | 2.633  | 1.818  | 2.734  | 2.442  | 2.394  | 21652     | PHF1     | NR_126158_17_+1 |
| Gzmm          | -4.981 | -4.981 | -3.603 | -4.953 | -4.964 | -4.878 | -4.954 | -4.969 | -4.512 | -4.981 | 16904     | GZMM     | NR_126325_10_+1 |
| Esr1          | -2.925 | -1.533 | -1.763 | -3.610 | -1.133 | -1.536 | -1.542 | -2.819 | -0.717 | -1.154 | 13982     | ESR1     | NR_126357_10_+1 |
| 3300002P13Rik | -2.842 | -0.385 | -2.559 | -2.941 | -2.996 | -4.016 | -3.960 | -4.886 | -4.981 | -4.981 | 70230     | NA       | NR_126426_7_-1  |
| Gm13985       | -3.492 | -4.981 | -3.443 | -3.929 | -3.145 | -3.733 | -2.408 | -2.460 | -2.772 | -4.156 | 100504728 | NA       | NR_126427_2_-1  |
| 1700095J12Rik | -4.981 | -3.267 | -4.248 | -4.519 | -3.731 | -2.707 | -4.458 | -4.377 | -3.134 | -4.342 | 73563     | NA       | NR_126429_4_-1  |
| 4833415N18Rik | -4.981 | -4.981 | -4.805 | -4.705 | -4.981 | -4.981 | -4.364 | -4.878 | -4.981 | -4.981 | 73761     | NA       | NR_126430_16_+1 |
| 4930597A21Rik | -4.981 | -4.981 | -4.853 | -4.511 | -4.714 | -2.957 | -4.974 | -0.401 | -4.981 | -4.981 | 75389     | NA       | NR_126460_11_+1 |
| Inpp5b        | -4.309 | -0.010 | 0.297  | -1.626 | -0.739 | 0.044  | -2.768 | -3.029 | 1.164  | -0.515 | 16330     | INPP5B   | NR_126474_4_+1  |
| Lymr1         | -1.026 | -4.733 | -4.475 | -4.340 | -2.397 | -3.701 | -3.416 | -3.800 | -1.061 | -0.550 | 73919     | LYRM1    | NR_126475_7_+1  |
| Gm13986       | -4.981 | -4.981 | -4.981 | -4.981 | -4.970 | -4.519 | -4.979 | -4.972 | -1.625 | -1.429 | 329496    | NA       | NR_126479_2_-1  |
| 6330415G19Rik | 1.289  | 0.617  | -0.057 | -0.774 | -0.584 | -0.409 | -1.085 | 0.154  | -0.824 | -0.813 | 320020    | NA       | NR_126484_17_+1 |
| 6330415G19Rik | -1.743 | -4.981 | -3.956 | -4.942 | -4.964 | -4.129 | -4.954 | -4.976 | -4.981 | -4.981 | 320020    | NA       | NR_126485_17_+1 |
| 2210406O10Rik | -4.981 | -4.981 | -3.106 | -4.878 | -4.993 | -3.946 | -4.966 | -4.737 | -4.981 | -4.981 | 76710     | NA       | NR_126489_5_-1  |
| 2210406O10Rik | -2.501 | -4.981 | -4.998 | -2.924 | -3.422 | -4.597 | -3.398 | -4.216 | -3.109 | -4.316 | 76710     | NA       | NR_126490_5_-1  |
| D030018L15Rik | -4.981 | -4.981 | 0.714  | 0.399  | -4.981 | -4.981 | -4.981 | -4.981 | -4.981 | -4.981 | 402773    | NA       | NR_126492_15_-1 |
| Iffo1         | 1.865  | 1.004  | 0.101  | 0.041  | -0.458 | 0.062  | 0.504  | 0.165  | 3.048  | 1.958  | 320678    | IFFO1    | NR_126495_6_+1  |
| Mdm4          | 4.484  | 4.673  | 5.225  | 5.102  | 5.597  | 5.741  | 5.104  | 4.949  | 4.074  | 4.821  | 17248     | MDM4     | NR_126506_1_-1  |
| Chd6          | 3.625  | 3.726  | 3.297  | 3.749  | 4.129  | 4.097  | 3.826  | 3.145  | 1.991  | 2.673  | 71389     | CHD6     | NR_126509_2_-1  |
| Oas1g         | -4.981 | -4.981 | -2.925 | -4.725 | 2.101  | -2.257 | 2.582  | -2.185 | 3.572  | -0.456 | 23960     | OAS1     | NR_126529_5_-1  |
| Gm1647        | -3.099 | -3.267 | 0.344  | -0.546 | 0.226  | -0.075 | -0.011 | -1.940 | -3.204 | -1.791 | 381452    | NA       | NR_126533_3_+1  |
| Snrrp70       | -1.587 | -0.471 | -1.272 | -2.144 | -0.400 | 0.029  | -1.594 | -0.906 | 2.086  | 1.842  | 20637     | SNRRNP70 | NR_126538_7_-1  |
| Snrrp70       | 3.640  | 3.968  | 4.504  | 4.367  | 4.454  | 4.937  | 4.442  | 4.660  | 5.514  | 5.946  | 20637     | SNRRNP70 | NR_126539_7_-1  |
| Mirc35hg      | -1.329 | -2.895 | -4.988 | -4.779 | -3.735 | -4.693 | -4.569 | -4.499 | -3.290 | -4.981 | 101447999 | NA       | NR_126540_6_-1  |
| Far1os        | -4.981 | -3.315 | -3.059 | -3.816 | -3.995 | -4.212 | -4.168 | -4.514 | -2.506 | -3.003 | 69295     | NA       | NR_126544_7_-1  |
| 1700100I10Rik | -4.981 | -4.981 | -4.981 | -4.981 | -4.973 | -4.632 | -4.981 | -4.981 | -4.981 | -4.981 | 74982     | NA       | NR_126548_14_-1 |
| 1700100I10Rik | -4.981 | -4.981 | -4.981 | -4.981 | -4.981 | -4.981 | -4.981 | -4.981 | -4.981 | -4.981 | 74982     | NA       | NR_126549_14_-1 |
| 1700100I10Rik | -4.863 | -4.426 | -4.976 | -4.961 | -4.729 | -4.974 | -4.769 | -4.947 | -4.981 | -4.981 | 74982     | NA       | NR_126550_14_-1 |
| 1700100I10Rik | -3.843 | -2.275 | -4.762 | -4.539 | -4.952 | -4.952 | -3.944 | -4.356 | -4.981 | -4.981 | 74982     | NA       | NR_126551_14_-1 |
| C030013C21Rik | -2.559 | -1.591 | -4.243 | -2.595 | -2.754 | -2.164 | -1.834 | -1.387 | -4.981 | -4.981 | 77417     | NA       | NR_126552_11_-1 |
| 2500002B13Rik | -0.229 | 0.068  | -2.560 | -2.170 | 0.173  | -0.376 | 1.118  | 0.890  | 1.249  | 3.131  | 78353     | NA       | NR_126553_8_+1  |
| 2500002B13Rik | 0.101  | -1.462 | -2.923 | -2.550 | -1.804 | -2.198 | -3.657 | -3.324 | -4.981 | -4.981 | 78353     | NA       | NR_126555_8_+1  |
| 2500002B13Rik | -4.783 | -2.160 | -3.798 | -3.048 | -3.311 | -3.481 | -2.715 | -1.556 | -0.285 | 2.499  | 78353     | NA       | NR_126556_8_+1  |
| E230013L22Rik | -1.078 | -1.780 | -0.360 | 0.654  | 0.505  | 0.619  | 1.234  | 1.434  | 0.669  | 1.613  | 102132    | NA       | NR_126558_8_+1  |
| 4930447M23Rik | -4.981 | -4.981 | -4.374 | -4.956 | -3.788 | -4.586 | -3.806 | -4.920 | -4.981 | -4.981 | 108871    | NA       | NR_126563_2_+1  |
| Prmt2         | -4.707 | -0.682 | -4.377 | -3.922 | -4.849 | -4.911 | -4.801 | -4.865 | -4.651 | -4.871 | 15468     | PRMT2    | NR_126571_10_-1 |
| Gm10371       | -1.433 | -3.315 | -4.253 | -2.417 | -4.226 | -2.741 | -4.959 | -3.171 | -4.394 | -2.593 | 100038654 | NA       | NR_126579_14_-1 |
| Gm20219       | -0.656 | -0.028 | -1.259 | -0.569 | -0.184 | -1.084 | -0.934 | -1.078 | -0.937 | -1.431 | 100504425 | NA       | NR_130128_17_-1 |
| Prdx6         | 2.758  | 2.348  | 1.845  | 1.170  | 2.917  | 3.067  | 3.005  | 2.317  | 2.234  | 1.943  | 11758     | PRDX6    | NR_130150_1_-1  |
| 4930480K23Rik | -1.679 | -1.481 | -3.380 | -3.191 | -3.183 | -3.862 | -3.292 | -4.129 | -2.614 | -1.683 | 75016     | NA       | NR_130157_14_+1 |

|               |        |        |        |        |        |        |        |        |        |        |           |               |                     |
|---------------|--------|--------|--------|--------|--------|--------|--------|--------|--------|--------|-----------|---------------|---------------------|
| 4930594021Rik | -4.981 | -4.981 | -4.940 | -4.979 | -4.981 | -4.981 | -4.981 | -4.981 | -4.981 | -4.981 | 75947     | NA            | NR_130161_3_+1      |
| 4930594021Rik | -4.981 | -4.981 | -4.522 | -4.602 | -4.981 | -4.981 | -4.981 | -4.981 | -4.981 | -4.981 | 75947     | NA            | NR_130162_3_+1      |
| 4930480K23Rik | -0.326 | -0.740 | -1.466 | -2.293 | -1.364 | -0.650 | -1.056 | -2.428 | -3.254 | -0.985 | 75016     | NA            | NR_130166_14_+1     |
| 6530403H02Rik | -3.324 | -3.177 | -1.969 | -3.333 | -3.159 | -3.221 | -3.281 | -3.439 | -3.201 | -2.045 | 320739    | NA            | NR_130170_3_-1      |
| 1700099109Rik | -4.981 | -3.061 | -4.980 | -4.178 | -4.457 | -4.932 | -4.981 | -4.981 | -4.981 | -4.981 | 76624     | NA            | NR_130171_13_+1     |
| 4930405022Rik | -2.413 | -3.267 | -2.782 | -3.047 | -2.705 | -4.135 | -3.811 | -3.965 | -4.981 | -3.882 | 414079    | NA            | NR_130176_17_-1     |
| Hus1          | -0.072 | 0.402  | -1.353 | -0.659 | -0.620 | 0.783  | -1.627 | -2.169 | 0.390  | -2.047 | 15574     | HUS1          | NR_130178_11_-1     |
| Gm16070       | -4.981 | -4.981 | -3.255 | -4.825 | -3.656 | -4.754 | -4.489 | -4.138 | -3.595 | -4.199 | 102634913 | NA            | NR_130314_1_-1      |
| 1700099109Rik | -2.925 | -1.293 | -4.335 | -3.850 | -4.130 | -4.082 | -3.941 | -4.747 | -4.394 | -4.342 | 76624     | NA            | NR_130318_13_+1     |
| Gm15326       | 4.055  | 0.128  | -0.611 | -4.002 | -0.813 | -3.367 | -0.335 | -3.396 | 0.849  | -3.853 | 102636620 | NA            | NR_130345_13_+1     |
| Msh5          | -0.896 | -4.108 | -2.690 | -3.369 | -4.696 | -2.414 | -1.881 | -3.870 | -4.448 | -4.923 | 17687     | MSH5          | NR_130640_17_-1     |
| Msh5          | -4.353 | -4.338 | -0.365 | -2.565 | -1.470 | -2.847 | -3.325 | -2.414 | -3.871 | -4.605 | 17687     | MSH5          | NR_130641_17_-1     |
| Kcnmb4os2     | -4.981 | -4.981 | -0.155 | -1.492 | -4.778 | -4.379 | -4.548 | -1.704 | -3.322 | -4.981 | 100504412 | NA            | NR_130644_10_+1     |
| Dzip1         | -2.157 | -4.501 | -1.954 | -4.957 | -3.405 | -4.043 | -3.143 | -4.688 | -4.932 | -4.967 | 66573     | DZIP1         | NR_130725_14_-1     |
| Rnf13         | 5.749  | 5.481  | 2.753  | 2.162  | 4.525  | 4.356  | 4.087  | 3.286  | 4.463  | 4.319  | 24017     | RNF13         | NR_130743_3_+1      |
| Slc9a8        | -0.545 | 1.264  | -1.616 | -1.332 | -0.262 | -2.280 | 0.086  | -1.127 | -1.779 | 0.628  | 77031     | SLC9A8        | NR_130767_2_+1      |
| Cep41         | 1.446  | 1.211  | 0.464  | -0.250 | -0.179 | -0.835 | 0.381  | -1.743 | -4.147 | -2.138 | 83922     | CEP41         | NR_130775_6_-1      |
| Cep41         | -4.426 | 0.918  | -4.275 | -4.860 | -2.845 | -4.546 | -4.395 | -4.770 | -4.500 | -4.656 | 83922     | CEP41         | NR_130781_6_-1      |
| Tbce          | 2.275  | 3.489  | 3.319  | 3.370  | 3.180  | 3.513  | 2.688  | 3.164  | 2.229  | 2.558  | 70430     | TBCE          | NR_130788_13_-1     |
| 2400006E01Rik | -4.981 | -4.981 | -4.981 | -4.981 | -4.981 | -4.981 | -4.981 | -4.981 | -4.981 | -4.981 | 78648     | NA            | NR_130791_3_-1      |
| C1ca3a1       | -2.133 | -4.981 | -3.510 | -3.400 | -2.754 | -2.502 | -2.577 | -3.201 | -4.981 | -2.932 | 12722     | NA            | NR_130895_3_-1      |
| Pex26         | -3.026 | -1.429 | -2.111 | -2.214 | -1.856 | -2.475 | -2.005 | -4.541 | -1.730 | -3.368 | 74043     | PEX26         | NR_130903_6_+1      |
| 1500026H17Rik | -1.901 | -0.990 | -4.064 | -3.806 | -3.173 | -4.777 | -2.606 | -3.525 | -3.351 | -3.481 | 69002     | NA            | NR_130956_10_+1     |
| 4632404H12Rik | 1.406  | 2.046  | 1.222  | 1.168  | 1.446  | 1.323  | 0.893  | 1.229  | 0.894  | 0.921  | 74034     | NA            | NR_130957_3_-1      |
| Brip1os       | 4.636  | 5.102  | 4.775  | 4.646  | 5.036  | 4.944  | 4.969  | 5.068  | 4.584  | 4.902  | 74038     | NA            | NR_130958_11_+1     |
| Brip1os       | -0.607 | -2.297 | -0.825 | -0.731 | -1.045 | -1.577 | -2.308 | -2.203 | -1.177 | -0.751 | 74038     | NA            | NR_130959_11_+1     |
| B230354K17Rik | -0.646 | -0.267 | 2.989  | 1.987  | 1.669  | 2.167  | 2.032  | 1.672  | 1.365  | 2.262  | 105246278 | NA            | NR_130960_17_+1     |
| B230354K17Rik | 2.243  | 2.672  | 2.283  | 1.642  | 2.351  | 1.276  | 1.714  | 1.630  | 1.600  | 0.993  | 105246278 | NA            | NR_130961_17_+1     |
| B230307C23Rik | 3.842  | 3.346  | 3.768  | 3.490  | 2.932  | 2.560  | 3.193  | 2.888  | 2.898  | 2.412  | 245305    | NA            | NR_130962_16_+1     |
| Gm14296       | -1.803 | -1.963 | -4.670 | -3.122 | -3.967 | -4.108 | -4.570 | -4.305 | -4.009 | -3.603 | 102639598 | ZNF559-ZNF177 | NR_130970_2_+1      |
| Gm14296       | -2.674 | -1.255 | -5.001 | -3.130 | -3.874 | -4.245 | -4.570 | -4.305 | -4.009 | -3.603 | 102639598 | ZNF559-ZNF177 | NR_130970_dup1_2_-1 |
| 2210418010Rik | -1.822 | -1.978 | -4.675 | -3.145 | -4.025 | -4.123 | -4.586 | -4.292 | -4.013 | -3.621 | 100504263 | NA            | NR_130971_2_+1      |
| 2210418010Rik | -2.684 | -1.275 | -5.002 | -3.152 | -3.937 | -4.258 | -4.586 | -4.292 | -4.013 | -3.621 | 100504263 | NA            | NR_130971_dup1_2_-1 |
| 4930549C15Rik | -2.604 | -4.981 | -4.981 | -4.981 | -4.800 | -4.764 | -2.375 | -3.364 | -0.742 | -3.167 | 75243     | NA            | NR_130981_12_+1     |
| 4930504C09Rik | -3.668 | -3.267 | -2.550 | -4.189 | -3.253 | -4.487 | -4.370 | -4.398 | -3.925 | -4.342 | 75076     | NA            | NR_130983_15_+1     |
| 4930595D18Rik | -4.981 | -4.981 | -4.991 | -4.237 | -3.645 | -4.482 | -2.812 | -4.060 | -4.394 | -2.629 | 78062     | NA            | NR_130987_12_-1     |
| 4930557K07Rik | -3.563 | -3.267 | -3.609 | -3.853 | -3.128 | -3.736 | -4.022 | -4.433 | -1.841 | -1.787 | 78202     | NA            | NR_130997_6_-1      |
| 1810041H14Rik | -0.087 | -0.401 | 2.267  | 2.344  | 3.476  | 3.891  | 3.045  | 1.782  | -1.323 | -0.840 | 78312     | NA            | NR_130999_14_-1     |
| 5430431A17Rik | -3.349 | -1.736 | -3.779 | -3.177 | -3.215 | -3.654 | -3.793 | -4.817 | -3.322 | -3.527 | 71368     | NA            | NR_131001_7_+1      |
| 1810041H14Rik | -3.349 | -4.981 | -3.031 | -2.222 | -3.527 | -3.587 | -3.192 | -3.950 | -4.981 | -4.981 | 78312     | NA            | NR_131002_14_-1     |
| 1700122C19Rik | -4.981 | -4.981 | -4.970 | -4.970 | -4.981 | -4.981 | -4.981 | -4.981 | -4.981 | -4.981 | 78640     | NA            | NR_131008_19_+1     |
| 1700122C19Rik | -2.647 | -3.315 | -4.981 | -4.981 | -4.981 | -4.981 | -4.981 | -4.981 | -4.981 | -4.981 | 78640     | NA            | NR_131009_19_+1     |
| 9530062K07Rik | 0.942  | -0.750 | -0.996 | -1.907 | -0.841 | -1.947 | -0.073 | -1.803 | -2.753 | -3.205 | 78739     | NA            | NR_131013_6_-1      |
| 4930455G09Rik | -1.108 | -2.291 | 4.486  | 3.585  | -0.558 | -1.474 | 2.049  | 1.733  | 3.255  | 2.079  | 78917     | NA            | NR_131014_4_+1      |
| 5033403F01Rik | -1.753 | -3.230 | -2.243 | -3.639 | -2.187 | -2.261 | -2.630 | -2.280 | -4.190 | -2.668 | 75958     | NA            | NR_131019_13_+1     |
| 4930512J16Rik | -4.981 | -4.981 | -1.228 | -0.600 | -4.761 | -4.957 | -3.806 | -4.405 | -4.981 | -4.981 | 75131     | NA            | NR_131021_6_-1      |
| 0610039H22Rik | 1.045  | -3.408 | -1.450 | -4.524 | -1.796 | -4.739 | -1.734 | -4.337 | -4.981 | -4.981 | 68397     | NA            | NR_131025_11_+1     |
| Cenpl         | 1.154  | -0.016 | 0.588  | 1.031  | 0.731  | 0.888  | 0.843  | 0.787  | -0.037 | 1.039  | 70454     | CENPL         | NR_131028_1_+1      |
| Cenpl         | -0.956 | 0.209  | -0.561 | 0.623  | -1.641 | -4.778 | -1.943 | -2.241 | -1.735 | 0.011  | 70454     | CENPL         | NR_131029_1_+1      |
| Cenpl         | 0.562  | 0.192  | 0.725  | 0.848  | 1.244  | 0.676  | 1.547  | 1.855  | 1.177  | 0.848  | 70454     | CENPL         | NR_131030_1_+1      |
| Atxn71los2    | -0.475 | -2.203 | -0.221 | -0.557 | -0.528 | -1.184 | -1.521 | -1.686 | -0.777 | -0.062 | 75836     | NA            | NR_131031_12_-1     |
| LOC105246506  | -3.004 | -2.188 | -2.340 | -2.384 | -1.697 | -2.993 | -2.175 | -1.528 | -0.374 | -1.624 | 105246506 | NA            | NR_131039_18_+1     |
| 2010001A14Rik | 2.176  | 2.488  | 0.726  | 1.048  | 0.516  | 1.286  | 0.567  | 0.474  | 0.004  | 0.477  | 76516     | NA            | NR_131042_11_-1     |
| 1700112J16Rik | -4.981 | -1.693 | -3.696 | -3.788 | -4.415 | -4.902 | -4.223 | -4.539 | -4.981 | -4.981 | 76628     | NA            | NR_131043_7_-1      |
| 1700112J16Rik | -3.563 | -3.267 | -3.821 | -4.285 | -3.599 | -3.595 | -4.981 | -3.778 | -4.981 | -4.981 | 76628     | NA            | NR_131044_7_-1      |
| 1700123J17Rik | -4.819 | -4.318 | -4.908 | -4.978 | -4.951 | -4.979 | -4.954 | -4.978 | -4.981 | -4.981 | 76728     | NA            | NR_131046_7_-1      |
| 1700123J17Rik | -1.901 | 2.486  | -3.356 | -4.968 | -3.489 | -4.038 | -3.346 | -3.850 | -4.981 | -4.981 | 76728     | NA            | NR_131047_7_-1      |
| 2510003B16Rik | -1.075 | -1.435 | -2.521 | -3.243 | -1.360 | -1.348 | -2.956 | -1.478 | -1.971 | -2.713 | 76786     | NA            | NR_131048_4_+1      |
| 4933404K13Rik | -1.512 | -2.600 | -4.873 | -3.570 | -4.936 | -4.320 | -4.945 | -3.660 | -4.981 | -4.981 | 71018     | NA            | NR_131055_10_+1     |
| Gm38415       | -3.668 | -3.315 | -2.354 | -2.781 | -2.196 | -3.000 | -3.005 | -4.366 | -4.190 | -4.316 | 330796    | NA            | NR_131056_8_-1      |
| Gm27162       | -3.668 | -3.408 | -3.904 | -4.804 | -4.652 | -3.885 | -3.614 | -4.936 | -4.981 | -4.981 | 330917    | NA            | NR_131058_9_-1      |
| BC046251      | -4.981 | -4.981 | -2.765 | -3.999 | -4.237 | -4.709 | -3.632 | -4.390 | -4.981 | -4.981 | 407810    | NA            | NR_131060_7_+1      |
| Exosc10       | 3.596  | 1.173  | 2.394  | 2.293  | 2.008  | 2.248  | 0.118  | 1.923  | 2.513  | 2.440  | 50912     | EXOSC10       | NR_131061_4_+1      |
| Exosc10       | -0.587 | 1.712  | 1.278  | 0.855  | -0.031 | 0.712  | -0.704 | 0.912  | 0.723  | 0.890  | 50912     | EXOSC10       | NR_131062_4_+1      |
| Nol9          | 0.972  | -0.499 | -0.339 | 1.487  | 1.427  | 1.304  | 1.453  | 0.686  | 0.836  | -4.359 | 74035     | NOL9          | NR_131076_4_+1      |
| 9530020I12Rik | -2.483 | -2.344 | -4.981 | -4.981 | -4.981 | -4.981 | -4.981 | -4.981 | -4.981 | -4.981 | 77442     | NA            | NR_131084_12_-1     |
| 4831407H17Rik | -0.476 | -4.981 | -4.981 | -4.981 | -4.979 | -4.979 | -4.965 | -4.350 | -2.614 | -2.962 | 77710     | NA            | NR_131095_14_+1     |
| 9430065F17Rik | -0.644 | -4.981 | -2.285 | -4.316 | -1.566 | -4.437 | -4.209 | -4.921 | -3.750 | -4.981 | 77857     | NA            | NR_131098_13_+1     |
| 9430065F17Rik | -4.981 | -4.981 | -4.881 | -4.975 | -4.277 | -4.976 | -4.621 | -4.980 | -4.394 | -4.981 | 77857     | NA            | NR_131100_13_+1     |
| 9630013K17Rik | -4.981 | -4.981 | -4.480 | -4.332 | -4.593 | -4.805 | -4.695 | -4.623 | -3.373 | -4.342 | 78883     | NA            | NR_131111_11_+1     |
| 9630028I04Rik | -3.563 | -4.981 | 1.236  | 1.757  | 2.937  | 3.689  | 2.957  | 2.788  | -0.462 | -0.306 | 319720    | NA            | NR_131118_17_-1     |
| Tardbp        | 2.128  | 0.633  | 1.275  | 1.600  | 1.638  | 1.779  | 1.089  | 0.852  | 0.524  | 1.111  | 230908    | TARDBP        | NR_131120_4_-1      |
| 4930533N22Rik | -3.843 | -4.981 | -4.277 | -4.159 | -3.795 | -4.781 | -4.205 | -4.720 | -2.433 | -3.421 | 75205     | NA            | NR_131122_7_+1      |
| 9330136K24Rik | -2.319 | -0.679 | -0.305 | -0.698 | -0.638 | -1.598 | -0.959 | -1.164 | -1.572 | -0.766 | 319870    | NA            | NR_131123_17_-1     |

|               |        |        |        |        |        |        |        |        |        |        |           |         |                 |
|---------------|--------|--------|--------|--------|--------|--------|--------|--------|--------|--------|-----------|---------|-----------------|
| A430078I02Rik | -1.466 | -4.393 | -4.782 | -4.917 | -2.702 | -3.910 | -2.399 | -4.864 | -4.744 | -4.916 | 320486    | NA      | NR_131125_6_-1  |
| A430078I02Rik | -0.322 | -0.127 | -1.093 | -0.625 | 0.396  | 1.394  | -0.309 | -0.183 | -1.852 | -0.611 | 320486    | NA      | NR_131126_6_-1  |
| C230072F16Rik | -1.422 | -1.036 | -4.974 | -4.470 | -4.948 | -4.351 | -4.798 | -4.991 | -4.981 | -4.981 | 320784    | NA      | NR_131127_17_+1 |
| C230072F16Rik | -4.981 | -4.981 | -4.509 | -4.246 | -3.386 | -4.304 | -3.156 | -4.335 | -4.045 | -2.807 | 320784    | NA      | NR_131128_17_+1 |
| Gm12018       | -3.189 | -4.981 | -1.798 | -2.793 | -2.818 | -3.335 | -2.792 | -4.098 | -2.440 | -2.895 | 327872    | NA      | NR_131129_11_+1 |
| Gm16223       | -4.981 | -2.771 | -4.996 | -3.080 | -4.944 | -2.398 | -4.959 | -2.816 | -4.232 | -1.813 | 433882    | NA      | NR_131130_5_+1  |
| Gm21859       | -4.981 | -1.615 | -4.930 | -4.930 | -4.981 | -4.981 | -4.981 | -4.981 | -3.196 | -4.342 | 545180    | NA      | NR_131135_16_-1 |
| Gm29683       | -4.981 | -4.981 | -3.783 | -4.780 | -3.658 | -4.792 | -4.166 | -4.885 | -3.351 | -4.981 | 624549    | NA      | NR_131144_7_-1  |
| Gm6961        | -1.709 | -0.328 | -4.970 | -4.763 | -4.981 | -4.981 | -4.936 | -4.906 | -4.981 | -4.981 | 629300    | NA      | NR_131148_15_-1 |
| A430046D13Rik | 2.850  | 3.090  | 0.835  | 0.281  | 1.520  | 1.318  | 1.581  | 1.378  | 2.590  | 2.531  | 654440    | NA      | NR_131150_10_+1 |
| A430046D13Rik | 1.767  | 1.735  | -0.312 | -1.270 | 1.277  | 0.994  | 1.503  | 1.512  | 2.626  | 2.467  | 654440    | NA      | NR_131151_10_+1 |
| Gm8013        | 0.738  | 0.457  | -0.640 | -0.691 | 0.107  | -0.550 | -0.166 | -0.590 | -1.307 | -0.409 | 666266    | NA      | NR_131152_5_+1  |
| Gm3704        | -1.451 | -2.349 | -4.414 | -2.291 | -1.184 | -2.208 | -1.835 | -1.707 | -1.046 | -2.138 | 100042166 | NA      | NR_131166_5_+1  |
| Apoa2         | -4.981 | -4.981 | -4.473 | -4.763 | -4.546 | -4.922 | -4.956 | -4.629 | -3.738 | -4.227 | 11807     | APOA2   | NR_131173_1_+1  |
| Hotairm1      | -4.981 | -2.365 | -1.910 | -2.876 | -1.465 | -2.558 | -0.788 | -2.136 | -0.333 | -0.827 | 105242658 | NA      | NR_131181_6_+1  |
| Hoxaas2       | -3.487 | -4.981 | -4.393 | -3.807 | -2.492 | -3.608 | -3.310 | -4.110 | -4.981 | -4.981 | 105242657 | NA      | NR_131182_6_+1  |
| Ttc39aos1     | -1.901 | -1.729 | 2.880  | 3.436  | -4.599 | -3.155 | -4.928 | -3.011 | -4.981 | -4.981 | 102635290 | NA      | NR_131195_4_-1  |
| Bloodlinc     | -4.981 | -3.267 | -4.944 | -4.944 | -4.930 | -4.316 | -4.542 | -4.683 | -4.981 | -4.981 | 105463053 | NA      | NR_131196_11_-1 |
| Ggnbp2os      | 4.233  | 3.863  | 1.608  | 1.984  | 2.471  | 3.240  | 2.121  | 2.138  | 0.776  | 0.182  | 102635561 | NA      | NR_131197_11_+1 |
| Ggnbp2os      | 2.773  | 2.782  | 1.467  | 1.125  | 1.737  | 1.630  | 1.762  | 1.060  | 1.013  | 1.015  | 102635561 | NA      | NR_131201_11_+1 |
| Gm35612       | -2.686 | -4.981 | -2.039 | -4.353 | -2.730 | -3.707 | -4.828 | -3.653 | -4.981 | -3.527 | 102639259 | NA      | NR_131207_X_+1  |
| Themis        | -4.981 | -4.981 | -4.397 | -4.654 | -4.926 | -4.278 | -4.981 | -4.015 | -4.981 | -4.981 | 210757    | THEMIS  | NR_131208_10_+1 |
| Neat1         | 5.315  | 5.725  | 5.992  | 6.180  | 6.932  | 7.268  | 6.610  | 6.003  | 6.761  | 6.437  | 66961     | NA      | NR_131212_19_-1 |
| Akap8         | -1.854 | -3.129 | 0.766  | 1.039  | 0.611  | 0.136  | 0.624  | 0.971  | 3.527  | 2.949  | 56399     | AKAP8   | NR_131218_17_-1 |
| Akap8         | 3.336  | 3.757  | 2.698  | 2.989  | 3.087  | 3.630  | 3.369  | 3.149  | 3.102  | 3.600  | 56399     | AKAP8   | NR_131219_17_-1 |
| Ttpal         | 0.355  | -0.169 | 1.161  | -0.164 | -3.257 | -1.991 | -1.114 | -0.841 | 1.933  | 0.520  | 76080     | TTPAL   | NR_131225_2_+1  |
| Pank4         | 3.053  | 3.252  | 3.382  | 2.796  | 3.838  | 3.755  | 3.577  | 3.460  | 3.506  | 3.394  | 269614    | PANK4   | NR_131230_4_+1  |
| Limk1         | -4.957 | -1.648 | -1.081 | -1.005 | -1.815 | -1.383 | -2.815 | -2.335 | -0.242 | -1.774 | 16885     | LIMK1   | NR_131247_5_-1  |
| Carlr         | -4.981 | -4.981 | -3.577 | -4.932 | -4.069 | -4.032 | -4.981 | -4.981 | -4.981 | -4.981 | 66774     | NA      | NR_131254_2_-1  |
| Fcho1         | 1.236  | 1.924  | 2.111  | 1.121  | 1.041  | 0.696  | 0.226  | -0.118 | 1.366  | -0.035 | 74015     | FCHO1   | NR_131256_8_-1  |
| Tnfrsf23      | -4.756 | -4.981 | -4.733 | -0.644 | -4.454 | -4.350 | -2.513 | -4.959 | -0.617 | -4.795 | 79201     | NA      | NR_131763_7_-1  |
| Mtrr          | 0.151  | -2.011 | 0.071  | -1.530 | -1.073 | -0.913 | 0.335  | -0.711 | -0.774 | -1.184 | 210009    | MTRR    | NR_131892_13_-1 |
| Porcn         | -4.981 | -4.981 | -1.067 | 0.317  | -2.385 | -1.386 | -2.648 | -1.611 | -0.724 | 0.379  | 53627     | PORCN   | NR_131893_X_-1  |
| Cdkal1        | -4.981 | -4.981 | -4.981 | -4.981 | -4.981 | -4.981 | -4.954 | -4.968 | -4.981 | -4.981 | 68916     | CDKAL1  | NR_131896_13_-1 |
| Mrgpra6       | 4.209  | 4.370  | 5.102  | 4.927  | 5.387  | 5.493  | 4.807  | 4.478  | 4.131  | 4.441  | 381886    | NA      | NR_131899_7_-1  |
| Hymai         | -4.981 | -4.981 | -2.534 | -3.768 | -1.212 | -1.970 | -2.099 | -3.963 | -3.925 | -4.981 | 338438    | NA      | NR_131912_10_+1 |
| Lincred1      | -4.981 | -2.353 | -4.963 | -2.999 | -4.253 | -4.194 | -4.990 | -2.950 | -1.695 | -2.993 | 100996933 | NA      | NR_131913_2_+1  |
| Gm12866       | -4.981 | -4.981 | -4.981 | -4.981 | -4.981 | -4.981 | -4.981 | -4.981 | -4.981 | -4.227 | 433751    | NA      | NR_131914_4_-1  |
| Etaa1os       | -0.291 | -4.981 | 0.252  | -4.011 | -2.228 | -4.913 | -1.850 | -4.602 | -2.106 | -4.981 | 102633673 | NA      | NR_131915_11_+1 |
| Etaa1os       | -2.123 | 0.031  | -1.405 | -1.171 | -2.372 | -1.599 | -1.870 | -1.268 | -3.109 | -2.010 | 102633673 | NA      | NR_131916_11_+1 |
| Ube4bos3      | -4.981 | -2.997 | -3.848 | -2.946 | -2.434 | -3.990 | -2.630 | -3.692 | -2.343 | -1.715 | 74310     | NA      | NR_131918_4_+1  |
| Kif16bos      | -4.981 | -3.315 | -4.108 | -4.571 | -4.348 | -4.498 | -4.200 | -4.876 | -4.981 | -4.316 | 75053     | NA      | NR_131921_2_+1  |
| D5Ert6d15e    | 0.527  | -1.776 | -1.956 | -3.534 | -2.732 | -2.597 | -2.617 | -2.897 | -1.807 | -2.241 | 52401     | NA      | NR_131933_5_-1  |
| Pum3          | -0.693 | -4.981 | -4.808 | -2.448 | -2.172 | -2.932 | -0.869 | -3.435 | -1.734 | -2.645 | 52874     | PUM3    | NR_131940_19_-1 |
| Zfp950        | -4.981 | -4.981 | -2.495 | -3.503 | -4.536 | -4.822 | -3.552 | -4.153 | -1.542 | -3.998 | 414758    | NA      | NR_131953_19_-1 |
| Zfp950        | 3.832  | 3.588  | 2.229  | 1.533  | 2.617  | 1.401  | 2.083  | 1.516  | 1.786  | 1.960  | 414758    | NA      | NR_131954_19_-1 |
| Zfp950        | 3.749  | 1.788  | 1.641  | 0.296  | 2.250  | 1.251  | 1.994  | 0.366  | 1.698  | -0.406 | 414758    | NA      | NR_131955_19_-1 |
| Zfp950        | 2.158  | -4.981 | -0.735 | -4.810 | 0.242  | -4.910 | 0.174  | -4.947 | -0.557 | -4.943 | 414758    | NA      | NR_131956_19_-1 |
| Panct2        | -4.981 | -4.981 | -1.790 | -1.569 | -4.985 | -4.769 | -4.887 | -3.917 | -0.829 | -4.981 | 329217    | NA      | NR_131964_1_+1  |
| Mdrl          | 0.103  | -0.334 | -1.626 | -1.515 | -1.486 | -2.313 | -1.279 | -3.704 | -1.120 | -1.734 | 69591     | NA      | NR_131979_X_-1  |
| Magef1        | 4.352  | 4.122  | 3.866  | 3.578  | 2.783  | 2.783  | 2.791  | 3.010  | 2.504  | 2.488  | 76222     | NA      | NR_131983_16_-1 |
| LOC100049077  | 2.045  | 0.966  | -0.110 | -0.217 | -0.477 | -0.737 | -0.704 | -0.869 | -0.764 | -1.274 | 100049077 | NA      | NR_132099_9_-1  |
| Mir155hg      | -0.438 | -0.907 | 1.915  | 1.078  | 0.178  | -0.172 | 0.535  | -0.532 | -4.981 | -4.227 | 100653389 | NA      | NR_132106_16_+1 |
| Gbp11         | -4.981 | -3.738 | -4.975 | -4.670 | -4.553 | -4.825 | -3.681 | -3.995 | -4.981 | -4.981 | 634650    | GBP6    | NR_132129_5_-1  |
| Clec7a        | -2.516 | -2.098 | 1.719  | 2.611  | 2.173  | 2.885  | 4.670  | 6.864  | 4.521  | 7.617  | 56644     | CLEC7A  | NR_132130_6_-1  |
| Borcs8        | 1.045  | 2.327  | 0.557  | 0.369  | 0.188  | -0.012 | -0.912 | -0.146 | -0.006 | -0.725 | 72368     | BORCS8  | NR_132131_8_+1  |
| Borcs8        | 1.778  | 2.830  | 0.395  | 0.879  | 0.790  | 1.641  | 0.537  | 0.046  | -0.012 | 0.113  | 72368     | BORCS8  | NR_132132_8_+1  |
| Borcs8        | -1.017 | -0.803 | -2.936 | -3.320 | -2.578 | -2.380 | -1.961 | -2.290 | -1.787 | -1.161 | 72368     | BORCS8  | NR_132133_8_+1  |
| Cox16         | -3.138 | -2.272 | -4.905 | -4.464 | -4.933 | -4.697 | -4.456 | -4.971 | -2.857 | -3.962 | 66272     | COX16   | NR_132134_12_-1 |
| Cox16         | -0.810 | -0.076 | -1.366 | -1.907 | -2.302 | -3.401 | -1.124 | -2.483 | -2.866 | -1.979 | 66272     | COX16   | NR_132135_12_-1 |
| Synj2bp       | 2.984  | 3.395  | 3.256  | 2.946  | 2.166  | 1.736  | 2.315  | 2.841  | 2.208  | 2.859  | 24071     | SYNJ2BP | NR_132136_12_-1 |
| Synj2bp       | -0.863 | -2.529 | 0.205  | -0.393 | -0.209 | -0.339 | -0.644 | -1.129 | -0.117 | -1.307 | 24071     | SYNJ2BP | NR_132142_12_-1 |
| Pold4         | 1.445  | 1.381  | 1.801  | 1.593  | 1.475  | 1.961  | 1.444  | 2.033  | 1.156  | 0.979  | 69745     | POLD4   | NR_132280_19_+1 |
| Clcf1-pold4   | -4.981 | -4.981 | -4.801 | -4.981 | -4.725 | -4.954 | -4.361 | -4.548 | -3.203 | -4.981 | 105948585 | NA      | NR_132308_19_+1 |
| Clcf1-pold4   | -3.145 | -4.981 | -3.440 | -4.205 | -3.772 | -4.301 | -4.930 | -4.955 | -2.519 | -4.981 | 105948585 | NA      | NR_132309_19_+1 |
| Dpm1-adnp     | 6.090  | 6.138  | 5.777  | 5.579  | 5.797  | 5.793  | 5.460  | 5.157  | 4.647  | 4.992  | 105980075 | NA      | NR_132310_2_-1  |
| Rnf8-cmtr1    | 3.162  | 2.743  | 2.867  | 2.354  | 2.776  | 2.857  | 2.509  | 2.290  | 2.614  | 2.275  | 106014251 | NA      | NR_132314_17_+1 |























333442\_dup1\_17\_-\_1

































083955\_dup1\_11+\_2

097979\_dup1\_13+\_1

00109\_dup1\_12+\_2

00116\_dup1\_12+\_2

01656\_dup1\_11\_-1

01657\_dup1\_11\_-1





10555\_dup1\_13+\_1







123367\_dup1\_17\_-\_2

123367\_dup2\_17\_-\_3

123368\_dup1\_17\_-\_3















































66627\_dup1\_17\_-\_1

66630\_dup1\_17\_-\_1

66636\_dup1\_10+\_2

66636\_dup2\_10\_-\_1

66637\_dup1\_10+\_1

66637\_dup2\_10+\_2











177538\_dup1\_14+\_2  
177538\_dup2\_14+\_3

177539\_dup1\_14+\_2  
177539\_dup2\_14+\_3

177544\_dup1\_13-\_1





















42941\_dup1\_14+\_2

42945\_dup1\_14+\_2

43067\_dup1\_10+\_2













256501\_dup1\_14\_+\_2

256885\_dup1\_14\_+\_2

256886\_dup1\_14\_-\_2

70495\_dup1\_14\_-\_2  
70495\_dup2\_14\_-\_3

70496\_dup1\_14\_-\_2  
70496\_dup2\_14\_-\_3

70498\_dup1\_14\_-\_2  
70498\_dup2\_14\_-\_3

70499\_dup1\_14\_-\_2  
70499\_dup2\_14\_-\_3

70503\_dup1\_14\_-\_2  
70503\_dup2\_14\_-\_3

70806\_dup1\_14\_+\_3  
70806\_dup2\_14\_+\_1















































91093\_dup1\_14\_-\_2

91094\_dup1\_14\_-\_2
